# Supplementary material for: Genetic dissection of seed-iron and zinc concentrations in chickpea
Source: PubMed Central journal article supplement (PMC4827059; doi:10.1038/srep24050), 2016-04-11
Supplement: srep24050-s1.pdf [file srep24050-s1.pdf]

## **Genetic dissection of seed-iron and zinc concentrations in chickpea**

**Hari D. Upadhyaya<sup>1a</sup>, Deepak Bajaj<sup>2a</sup>, Shouvik Das<sup>2a</sup>, Vinod Kumar<sup>3</sup>, C.L.L. Gowda<sup>1</sup>, Shivali Sharma<sup>1</sup>, Akhilesh K. Tyagi<sup>2</sup> & Swarup K. Parida<sup>2\*</sup>**

<sup>1</sup>International Crops Research Institute for the Semi-Arid Tropics (ICRISAT), Patancheru 502324, Andhra Pradesh, India

<sup>2</sup>National Institute of Plant Genome Research (NIPGR), Aruna Asaf Ali Marg, New Delhi 110067, India

<sup>3</sup>National Research Centre on Plant Biotechnology (NRCPB), New Delhi 110012, India

<sup>a</sup>These authors contributed equally to this work

\*Corresponding author

**Table S1.** 24405 genome-wide SNPs identified using reference *kabuli* genome- and *de novo*-based GBS assay in chickpea

| S.N. | SNP IDs  | Cultivars     | Chromosomes/scaffolds  | Physical positions (bp) | SNPs  |
|------|----------|---------------|------------------------|-------------------------|-------|
| 1    | CakSNP1  | <i>Kabuli</i> | <i>Ca_Kabuli_Chr01</i> | 523                     | (G/C) |
| 2    | CakSNP2  | <i>Kabuli</i> | <i>Ca_Kabuli_Chr01</i> | 462                     | (G/C) |
| 3    | CakSNP3  | <i>Kabuli</i> | <i>Ca_Kabuli_Chr01</i> | 548                     | (G/C) |
| 4    | CakSNP4  | <i>Kabuli</i> | <i>Ca_Kabuli_Chr01</i> | 578                     | (G/A) |
| 5    | CakSNP5  | <i>Kabuli</i> | <i>Ca_Kabuli_Chr01</i> | 579                     | (T/C) |
| 6    | CakSNP6  | <i>Kabuli</i> | <i>Ca_Kabuli_Chr01</i> | 589                     | (A/C) |
| 7    | CakSNP7  | <i>Kabuli</i> | <i>Ca_Kabuli_Chr01</i> | 627                     | (C/A) |
| 8    | CakSNP8  | <i>Kabuli</i> | <i>Ca_Kabuli_Chr01</i> | 839                     | (A/T) |
| 9    | CakSNP9  | <i>Kabuli</i> | <i>Ca_Kabuli_Chr01</i> | 903                     | (G/T) |
| 10   | CakSNP10 | <i>Kabuli</i> | <i>Ca_Kabuli_Chr01</i> | 927                     | (C/A) |
| 11   | CakSNP11 | <i>Kabuli</i> | <i>Ca_Kabuli_Chr01</i> | 98930                   | (T/C) |
| 12   | CakSNP12 | <i>Kabuli</i> | <i>Ca_Kabuli_Chr01</i> | 98992                   | (G/T) |
| 13   | CakSNP13 | <i>Kabuli</i> | <i>Ca_Kabuli_Chr01</i> | 99242                   | (G/A) |
| 14   | CakSNP14 | <i>Kabuli</i> | <i>Ca_Kabuli_Chr01</i> | 108882                  | (C/A) |
| 15   | CakSNP15 | <i>Kabuli</i> | <i>Ca_Kabuli_Chr01</i> | 108984                  | (G/A) |
| 16   | CakSNP16 | <i>Kabuli</i> | <i>Ca_Kabuli_Chr01</i> | 108979                  | (T/G) |
| 17   | CakSNP17 | <i>Kabuli</i> | <i>Ca_Kabuli_Chr01</i> | 129394                  | (A/G) |
| 18   | CakSNP18 | <i>Kabuli</i> | <i>Ca_Kabuli_Chr01</i> | 129401                  | (A/G) |
| 19   | CakSNP19 | <i>Kabuli</i> | <i>Ca_Kabuli_Chr01</i> | 173669                  | (C/T) |
| 20   | CakSNP20 | <i>Kabuli</i> | <i>Ca_Kabuli_Chr01</i> | 202954                  | (G/T) |
| 21   | CakSNP21 | <i>Kabuli</i> | <i>Ca_Kabuli_Chr01</i> | 208244                  | (G/A) |
| 22   | CakSNP22 | <i>Kabuli</i> | <i>Ca_Kabuli_Chr01</i> | 214979                  | (T/A) |
| 23   | CakSNP23 | <i>Kabuli</i> | <i>Ca_Kabuli_Chr01</i> | 215066                  | (G/T) |
| 24   | CakSNP24 | <i>Kabuli</i> | <i>Ca_Kabuli_Chr01</i> | 215058                  | (T/C) |
| 25   | CakSNP25 | <i>Kabuli</i> | <i>Ca_Kabuli_Chr01</i> | 215053                  | (G/T) |
| 26   | CakSNP26 | <i>Kabuli</i> | <i>Ca_Kabuli_Chr01</i> | 215048                  | (C/T) |
| 27   | CakSNP27 | <i>Kabuli</i> | <i>Ca_Kabuli_Chr01</i> | 215029                  | (C/A) |
| 28   | CakSNP28 | <i>Kabuli</i> | <i>Ca_Kabuli_Chr01</i> | 215027                  | (T/C) |
| 29   | CakSNP29 | <i>Kabuli</i> | <i>Ca_Kabuli_Chr01</i> | 215006                  | (C/T) |
| 30   | CakSNP30 | <i>Kabuli</i> | <i>Ca_Kabuli_Chr01</i> | 215239                  | (C/G) |
| 31   | CakSNP31 | <i>Kabuli</i> | <i>Ca_Kabuli_Chr01</i> | 292962                  | (T/C) |
| 32   | CakSNP32 | <i>Kabuli</i> | <i>Ca_Kabuli_Chr01</i> | 292972                  | (G/A) |
| 33   | CakSNP33 | <i>Kabuli</i> | <i>Ca_Kabuli_Chr01</i> | 292998                  | (T/C) |
| 34   | CakSNP34 | <i>Kabuli</i> | <i>Ca_Kabuli_Chr01</i> | 347620                  | (A/C) |
| 35   | CakSNP35 | <i>Kabuli</i> | <i>Ca_Kabuli_Chr01</i> | 372530                  | (A/G) |
| 36   | CakSNP36 | <i>Kabuli</i> | <i>Ca_Kabuli_Chr01</i> | 406570                  | (A/G) |
| 37   | CakSNP37 | <i>Kabuli</i> | <i>Ca_Kabuli_Chr01</i> | 425149                  | (T/C) |

| <b>S.N.</b> | <b>SNP IDs</b> | <b>Cultivars</b> | <b>Chromosomes/scaffolds</b> | <b>Physical positions (bp)</b> | <b>SNPs</b> |
|-------------|----------------|------------------|------------------------------|--------------------------------|-------------|
| 38          | CakSNP38       | <i>Kabuli</i>    | <i>Ca_Kabuli_Chr01</i>       | 425076                         | (A/G)       |
| 39          | CakSNP39       | <i>Kabuli</i>    | <i>Ca_Kabuli_Chr01</i>       | 435259                         | (A/G)       |
| 40          | CakSNP40       | <i>Kabuli</i>    | <i>Ca_Kabuli_Chr01</i>       | 435274                         | (G/T)       |
| 41          | CakSNP41       | <i>Kabuli</i>    | <i>Ca_Kabuli_Chr01</i>       | 435280                         | (T/C)       |
| 42          | CakSNP42       | <i>Kabuli</i>    | <i>Ca_Kabuli_Chr01</i>       | 435297                         | (G/A)       |
| 43          | CakSNP43       | <i>Kabuli</i>    | <i>Ca_Kabuli_Chr01</i>       | 435304                         | (G/T)       |
| 44          | CakSNP44       | <i>Kabuli</i>    | <i>Ca_Kabuli_Chr01</i>       | 435343                         | (C/A)       |
| 45          | CakSNP45       | <i>Kabuli</i>    | <i>Ca_Kabuli_Chr01</i>       | 435338                         | (T/C)       |
| 46          | CakSNP46       | <i>Kabuli</i>    | <i>Ca_Kabuli_Chr01</i>       | 435264                         | (G/T)       |
| 47          | CakSNP47       | <i>Kabuli</i>    | <i>Ca_Kabuli_Chr01</i>       | 441283                         | (G/A)       |
| 48          | CakSNP48       | <i>Kabuli</i>    | <i>Ca_Kabuli_Chr01</i>       | 441286                         | (C/T)       |
| 49          | CakSNP49       | <i>Kabuli</i>    | <i>Ca_Kabuli_Chr01</i>       | 441288                         | (T/A)       |
| 50          | CakSNP50       | <i>Kabuli</i>    | <i>Ca_Kabuli_Chr01</i>       | 441343                         | (T/A)       |
| 51          | CakSNP51       | <i>Kabuli</i>    | <i>Ca_Kabuli_Chr01</i>       | 446409                         | (T/C)       |
| 52          | CakSNP52       | <i>Kabuli</i>    | <i>Ca_Kabuli_Chr01</i>       | 446443                         | (A/G)       |
| 53          | CakSNP53       | <i>Kabuli</i>    | <i>Ca_Kabuli_Chr01</i>       | 446484                         | (C/T)       |
| 54          | CakSNP54       | <i>Kabuli</i>    | <i>Ca_Kabuli_Chr01</i>       | 446558                         | (G/T)       |
| 55          | CakSNP55       | <i>Kabuli</i>    | <i>Ca_Kabuli_Chr01</i>       | 459968                         | (T/G)       |
| 56          | CakSNP56       | <i>Kabuli</i>    | <i>Ca_Kabuli_Chr01</i>       | 464039                         | (A/C)       |
| 57          | CakSNP57       | <i>Kabuli</i>    | <i>Ca_Kabuli_Chr01</i>       | 464040                         | (G/C)       |
| 58          | CakSNP58       | <i>Kabuli</i>    | <i>Ca_Kabuli_Chr01</i>       | 464043                         | (C/G)       |
| 59          | CakSNP59       | <i>Kabuli</i>    | <i>Ca_Kabuli_Chr01</i>       | 471007                         | (C/T)       |
| 60          | CakSNP60       | <i>Kabuli</i>    | <i>Ca_Kabuli_Chr01</i>       | 471037                         | (C/T)       |
| 61          | CakSNP61       | <i>Kabuli</i>    | <i>Ca_Kabuli_Chr01</i>       | 527271                         | (T/G)       |
| 62          | CakSNP62       | <i>Kabuli</i>    | <i>Ca_Kabuli_Chr01</i>       | 527321                         | (C/T)       |
| 63          | CakSNP63       | <i>Kabuli</i>    | <i>Ca_Kabuli_Chr01</i>       | 554581                         | (G/T)       |
| 64          | CakSNP64       | <i>Kabuli</i>    | <i>Ca_Kabuli_Chr01</i>       | 554677                         | (G/A)       |
| 65          | CakSNP65       | <i>Kabuli</i>    | <i>Ca_Kabuli_Chr01</i>       | 571020                         | (T/G)       |
| 66          | CakSNP66       | <i>Kabuli</i>    | <i>Ca_Kabuli_Chr01</i>       | 591609                         | (T/C)       |
| 67          | CakSNP67       | <i>Kabuli</i>    | <i>Ca_Kabuli_Chr01</i>       | 609709                         | (A/G)       |
| 68          | CakSNP68       | <i>Kabuli</i>    | <i>Ca_Kabuli_Chr01</i>       | 609671                         | (C/T)       |
| 69          | CakSNP69       | <i>Kabuli</i>    | <i>Ca_Kabuli_Chr01</i>       | 609669                         | (C/G)       |
| 70          | CakSNP70       | <i>Kabuli</i>    | <i>Ca_Kabuli_Chr01</i>       | 644318                         | (C/T)       |
| 71          | CakSNP71       | <i>Kabuli</i>    | <i>Ca_Kabuli_Chr01</i>       | 644353                         | (G/A)       |
| 72          | CakSNP72       | <i>Kabuli</i>    | <i>Ca_Kabuli_Chr01</i>       | 644359                         | (T/A)       |
| 73          | CakSNP73       | <i>Kabuli</i>    | <i>Ca_Kabuli_Chr01</i>       | 644440                         | (T/C)       |
| 74          | CakSNP74       | <i>Kabuli</i>    | <i>Ca_Kabuli_Chr01</i>       | 644425                         | (G/A)       |
| 75          | CakSNP75       | <i>Kabuli</i>    | <i>Ca_Kabuli_Chr01</i>       | 661882                         | (A/G)       |
| 76          | CakSNP76       | <i>Kabuli</i>    | <i>Ca_Kabuli_Chr01</i>       | 662341                         | (A/C)       |

| <b>S.N.</b> | <b>SNP IDs</b> | <b>Cultivars</b> | <b>Chromosomes/scaffolds</b> | <b>Physical positions (bp)</b> | <b>SNPs</b> |
|-------------|----------------|------------------|------------------------------|--------------------------------|-------------|
| 77          | CakSNP77       | <i>Kabuli</i>    | <i>Ca_Kabuli_Chr01</i>       | 662489                         | (T/A)       |
| 78          | CakSNP78       | <i>Kabuli</i>    | <i>Ca_Kabuli_Chr01</i>       | 671420                         | (C/A)       |
| 79          | CakSNP79       | <i>Kabuli</i>    | <i>Ca_Kabuli_Chr01</i>       | 671410                         | (T/C)       |
| 80          | CakSNP80       | <i>Kabuli</i>    | <i>Ca_Kabuli_Chr01</i>       | 671391                         | (T/C)       |
| 81          | CakSNP81       | <i>Kabuli</i>    | <i>Ca_Kabuli_Chr01</i>       | 671389                         | (A/G)       |
| 82          | CakSNP82       | <i>Kabuli</i>    | <i>Ca_Kabuli_Chr01</i>       | 671388                         | (A/T)       |
| 83          | CakSNP83       | <i>Kabuli</i>    | <i>Ca_Kabuli_Chr01</i>       | 690156                         | (C/A)       |
| 84          | CakSNP84       | <i>Kabuli</i>    | <i>Ca_Kabuli_Chr01</i>       | 690431                         | (G/A)       |
| 85          | CakSNP85       | <i>Kabuli</i>    | <i>Ca_Kabuli_Chr01</i>       | 691102                         | (A/T)       |
| 86          | CakSNP86       | <i>Kabuli</i>    | <i>Ca_Kabuli_Chr01</i>       | 695962                         | (A/C)       |
| 87          | CakSNP87       | <i>Kabuli</i>    | <i>Ca_Kabuli_Chr01</i>       | 712110                         | (T/C)       |
| 88          | CakSNP88       | <i>Kabuli</i>    | <i>Ca_Kabuli_Chr01</i>       | 712073                         | (C/T)       |
| 89          | CakSNP89       | <i>Kabuli</i>    | <i>Ca_Kabuli_Chr01</i>       | 741514                         | (G/T)       |
| 90          | CakSNP90       | <i>Kabuli</i>    | <i>Ca_Kabuli_Chr01</i>       | 741535                         | (C/T)       |
| 91          | CakSNP91       | <i>Kabuli</i>    | <i>Ca_Kabuli_Chr01</i>       | 741565                         | (T/C)       |
| 92          | CakSNP92       | <i>Kabuli</i>    | <i>Ca_Kabuli_Chr01</i>       | 741549                         | (C/T)       |
| 93          | CakSNP93       | <i>Kabuli</i>    | <i>Ca_Kabuli_Chr01</i>       | 741980                         | (C/G)       |
| 94          | CakSNP94       | <i>Kabuli</i>    | <i>Ca_Kabuli_Chr01</i>       | 742043                         | (G/A)       |
| 95          | CakSNP95       | <i>Kabuli</i>    | <i>Ca_Kabuli_Chr01</i>       | 742026                         | (T/G)       |
| 96          | CakSNP96       | <i>Kabuli</i>    | <i>Ca_Kabuli_Chr01</i>       | 750693                         | (C/T)       |
| 97          | CakSNP97       | <i>Kabuli</i>    | <i>Ca_Kabuli_Chr01</i>       | 777273                         | (C/T)       |
| 98          | CakSNP98       | <i>Kabuli</i>    | <i>Ca_Kabuli_Chr01</i>       | 777240                         | (G/A)       |
| 99          | CakSNP99       | <i>Kabuli</i>    | <i>Ca_Kabuli_Chr01</i>       | 790004                         | (A/C)       |
| 100         | CakSNP100      | <i>Kabuli</i>    | <i>Ca_Kabuli_Chr01</i>       | 790000                         | (C/T)       |
| 101         | CakSNP101      | <i>Kabuli</i>    | <i>Ca_Kabuli_Chr01</i>       | 790102                         | (G/T)       |
| 102         | CakSNP102      | <i>Kabuli</i>    | <i>Ca_Kabuli_Chr01</i>       | 864205                         | (T/C)       |
| 103         | CakSNP103      | <i>Kabuli</i>    | <i>Ca_Kabuli_Chr01</i>       | 864382                         | (T/C)       |
| 104         | CakSNP104      | <i>Kabuli</i>    | <i>Ca_Kabuli_Chr01</i>       | 864381                         | (G/A)       |
| 105         | CakSNP105      | <i>Kabuli</i>    | <i>Ca_Kabuli_Chr01</i>       | 864351                         | (T/C)       |
| 106         | CakSNP106      | <i>Kabuli</i>    | <i>Ca_Kabuli_Chr01</i>       | 866872                         | (T/C)       |
| 107         | CakSNP107      | <i>Kabuli</i>    | <i>Ca_Kabuli_Chr01</i>       | 872443                         | (G/T)       |
| 108         | CakSNP108      | <i>Kabuli</i>    | <i>Ca_Kabuli_Chr01</i>       | 872452                         | (C/T)       |
| 109         | CakSNP109      | <i>Kabuli</i>    | <i>Ca_Kabuli_Chr01</i>       | 876616                         | (T/C)       |
| 110         | CakSNP110      | <i>Kabuli</i>    | <i>Ca_Kabuli_Chr01</i>       | 876633                         | (T/A)       |
| 111         | CakSNP111      | <i>Kabuli</i>    | <i>Ca_Kabuli_Chr01</i>       | 881543                         | (C/A)       |
| 112         | CakSNP112      | <i>Kabuli</i>    | <i>Ca_Kabuli_Chr01</i>       | 881673                         | (G/A)       |
| 113         | CakSNP113      | <i>Kabuli</i>    | <i>Ca_Kabuli_Chr01</i>       | 881703                         | (G/T)       |
| 114         | CakSNP114      | <i>Kabuli</i>    | <i>Ca_Kabuli_Chr01</i>       | 890949                         | (G/A)       |
| 115         | CakSNP115      | <i>Kabuli</i>    | <i>Ca_Kabuli_Chr01</i>       | 890948                         | (C/T)       |

| <b>S.N.</b> | <b>SNP IDs</b> | <b>Cultivars</b> | <b>Chromosomes/scaffolds</b> | <b>Physical positions (bp)</b> | <b>SNPs</b> |
|-------------|----------------|------------------|------------------------------|--------------------------------|-------------|
| 116         | CakSNP116      | <i>Kabuli</i>    | <i>Ca_Kabuli_Chr01</i>       | 910486                         | (T/A)       |
| 117         | CakSNP117      | <i>Kabuli</i>    | <i>Ca_Kabuli_Chr01</i>       | 970315                         | (A/T)       |
| 118         | CakSNP118      | <i>Kabuli</i>    | <i>Ca_Kabuli_Chr01</i>       | 996439                         | (T/C)       |
| 119         | CakSNP119      | <i>Kabuli</i>    | <i>Ca_Kabuli_Chr01</i>       | 1007698                        | (A/G)       |
| 120         | CakSNP120      | <i>Kabuli</i>    | <i>Ca_Kabuli_Chr01</i>       | 1008895                        | (A/G)       |
| 121         | CakSNP121      | <i>Kabuli</i>    | <i>Ca_Kabuli_Chr01</i>       | 1008971                        | (C/G)       |
| 122         | CakSNP122      | <i>Kabuli</i>    | <i>Ca_Kabuli_Chr01</i>       | 1009058                        | (A/C)       |
| 123         | CakSNP123      | <i>Kabuli</i>    | <i>Ca_Kabuli_Chr01</i>       | 1018966                        | (C/G)       |
| 124         | CakSNP124      | <i>Kabuli</i>    | <i>Ca_Kabuli_Chr01</i>       | 1020800                        | (A/G)       |
| 125         | CakSNP125      | <i>Kabuli</i>    | <i>Ca_Kabuli_Chr01</i>       | 1023550                        | (C/T)       |
| 126         | CakSNP126      | <i>Kabuli</i>    | <i>Ca_Kabuli_Chr01</i>       | 1023538                        | (T/C)       |
| 127         | CakSNP127      | <i>Kabuli</i>    | <i>Ca_Kabuli_Chr01</i>       | 1032734                        | (A/T)       |
| 128         | CakSNP128      | <i>Kabuli</i>    | <i>Ca_Kabuli_Chr01</i>       | 1059209                        | (A/G)       |
| 129         | CakSNP129      | <i>Kabuli</i>    | <i>Ca_Kabuli_Chr01</i>       | 1059311                        | (A/G)       |
| 130         | CakSNP130      | <i>Kabuli</i>    | <i>Ca_Kabuli_Chr01</i>       | 1083274                        | (T/C)       |
| 131         | CakSNP131      | <i>Kabuli</i>    | <i>Ca_Kabuli_Chr01</i>       | 1083388                        | (G/A)       |
| 132         | CakSNP132      | <i>Kabuli</i>    | <i>Ca_Kabuli_Chr01</i>       | 1083403                        | (C/T)       |
| 133         | CakSNP133      | <i>Kabuli</i>    | <i>Ca_Kabuli_Chr01</i>       | 1085228                        | (A/C)       |
| 134         | CakSNP134      | <i>Kabuli</i>    | <i>Ca_Kabuli_Chr01</i>       | 1085230                        | (T/G)       |
| 135         | CakSNP135      | <i>Kabuli</i>    | <i>Ca_Kabuli_Chr01</i>       | 1085238                        | (A/G)       |
| 136         | CakSNP136      | <i>Kabuli</i>    | <i>Ca_Kabuli_Chr01</i>       | 1085254                        | (A/C)       |
| 137         | CakSNP137      | <i>Kabuli</i>    | <i>Ca_Kabuli_Chr01</i>       | 1085263                        | (A/C)       |
| 138         | CakSNP138      | <i>Kabuli</i>    | <i>Ca_Kabuli_Chr01</i>       | 1085293                        | (G/A)       |
| 139         | CakSNP139      | <i>Kabuli</i>    | <i>Ca_Kabuli_Chr01</i>       | 1085348                        | (G/A)       |
| 140         | CakSNP140      | <i>Kabuli</i>    | <i>Ca_Kabuli_Chr01</i>       | 1091548                        | (T/A)       |
| 141         | CakSNP141      | <i>Kabuli</i>    | <i>Ca_Kabuli_Chr01</i>       | 1091534                        | (A/C)       |
| 142         | CakSNP142      | <i>Kabuli</i>    | <i>Ca_Kabuli_Chr01</i>       | 1091504                        | (C/T)       |
| 143         | CakSNP143      | <i>Kabuli</i>    | <i>Ca_Kabuli_Chr01</i>       | 1098703                        | (C/G)       |
| 144         | CakSNP144      | <i>Kabuli</i>    | <i>Ca_Kabuli_Chr01</i>       | 1098789                        | (A/G)       |
| 145         | CakSNP145      | <i>Kabuli</i>    | <i>Ca_Kabuli_Chr01</i>       | 1115668                        | (C/T)       |
| 146         | CakSNP146      | <i>Kabuli</i>    | <i>Ca_Kabuli_Chr01</i>       | 1115809                        | (A/G)       |
| 147         | CakSNP147      | <i>Kabuli</i>    | <i>Ca_Kabuli_Chr01</i>       | 1116043                        | (C/T)       |
| 148         | CakSNP148      | <i>Kabuli</i>    | <i>Ca_Kabuli_Chr01</i>       | 1140313                        | (A/C)       |
| 149         | CakSNP149      | <i>Kabuli</i>    | <i>Ca_Kabuli_Chr01</i>       | 1140405                        | (A/T)       |
| 150         | CakSNP150      | <i>Kabuli</i>    | <i>Ca_Kabuli_Chr01</i>       | 1150973                        | (C/T)       |
| 151         | CakSNP151      | <i>Kabuli</i>    | <i>Ca_Kabuli_Chr01</i>       | 1159383                        | (C/A)       |
| 152         | CakSNP152      | <i>Kabuli</i>    | <i>Ca_Kabuli_Chr01</i>       | 1159411                        | (T/G)       |
| 153         | CakSNP153      | <i>Kabuli</i>    | <i>Ca_Kabuli_Chr01</i>       | 1215024                        | (T/C)       |
| 154         | CakSNP154      | <i>Kabuli</i>    | <i>Ca_Kabuli_Chr01</i>       | 1269212                        | (C/G)       |

| <b>S.N.</b> | <b>SNP IDs</b> | <b>Cultivars</b> | <b>Chromosomes/scaffolds</b> | <b>Physical positions (bp)</b> | <b>SNPs</b> |
|-------------|----------------|------------------|------------------------------|--------------------------------|-------------|
| 155         | CakSNP155      | <i>Kabuli</i>    | <i>Ca_Kabuli_Chr01</i>       | 1269180                        | (C/A)       |
| 156         | CakSNP156      | <i>Kabuli</i>    | <i>Ca_Kabuli_Chr01</i>       | 1278884                        | (G/T)       |
| 157         | CakSNP157      | <i>Kabuli</i>    | <i>Ca_Kabuli_Chr01</i>       | 1278997                        | (T/A)       |
| 158         | CakSNP158      | <i>Kabuli</i>    | <i>Ca_Kabuli_Chr01</i>       | 1295527                        | (T/G)       |
| 159         | CakSNP159      | <i>Kabuli</i>    | <i>Ca_Kabuli_Chr01</i>       | 1335518                        | (A/C)       |
| 160         | CakSNP160      | <i>Kabuli</i>    | <i>Ca_Kabuli_Chr01</i>       | 1385553                        | (C/A)       |
| 161         | CakSNP161      | <i>Kabuli</i>    | <i>Ca_Kabuli_Chr01</i>       | 1385554                        | (G/T)       |
| 162         | CakSNP162      | <i>Kabuli</i>    | <i>Ca_Kabuli_Chr01</i>       | 1390073                        | (A/G)       |
| 163         | CakSNP163      | <i>Kabuli</i>    | <i>Ca_Kabuli_Chr01</i>       | 1411348                        | (C/T)       |
| 164         | CakSNP164      | <i>Kabuli</i>    | <i>Ca_Kabuli_Chr01</i>       | 1411351                        | (A/C)       |
| 165         | CakSNP165      | <i>Kabuli</i>    | <i>Ca_Kabuli_Chr01</i>       | 1411501                        | (C/T)       |
| 166         | CakSNP166      | <i>Kabuli</i>    | <i>Ca_Kabuli_Chr01</i>       | 1411498                        | (T/A)       |
| 167         | CakSNP167      | <i>Kabuli</i>    | <i>Ca_Kabuli_Chr01</i>       | 1411495                        | (A/G)       |
| 168         | CakSNP168      | <i>Kabuli</i>    | <i>Ca_Kabuli_Chr01</i>       | 1411490                        | (T/C)       |
| 169         | CakSNP169      | <i>Kabuli</i>    | <i>Ca_Kabuli_Chr01</i>       | 1428222                        | (C/G)       |
| 170         | CakSNP170      | <i>Kabuli</i>    | <i>Ca_Kabuli_Chr01</i>       | 1428251                        | (T/G)       |
| 171         | CakSNP171      | <i>Kabuli</i>    | <i>Ca_Kabuli_Chr01</i>       | 1428264                        | (T/G)       |
| 172         | CakSNP172      | <i>Kabuli</i>    | <i>Ca_Kabuli_Chr01</i>       | 1434121                        | (A/G)       |
| 173         | CakSNP173      | <i>Kabuli</i>    | <i>Ca_Kabuli_Chr01</i>       | 1434883                        | (A/G)       |
| 174         | CakSNP174      | <i>Kabuli</i>    | <i>Ca_Kabuli_Chr01</i>       | 1434875                        | (A/G)       |
| 175         | CakSNP175      | <i>Kabuli</i>    | <i>Ca_Kabuli_Chr01</i>       | 1449848                        | (G/A)       |
| 176         | CakSNP176      | <i>Kabuli</i>    | <i>Ca_Kabuli_Chr01</i>       | 1449913                        | (T/G)       |
| 177         | CakSNP177      | <i>Kabuli</i>    | <i>Ca_Kabuli_Chr01</i>       | 1449949                        | (G/A)       |
| 178         | CakSNP178      | <i>Kabuli</i>    | <i>Ca_Kabuli_Chr01</i>       | 1449980                        | (A/G)       |
| 179         | CakSNP179      | <i>Kabuli</i>    | <i>Ca_Kabuli_Chr01</i>       | 1461574                        | (T/A)       |
| 180         | CakSNP180      | <i>Kabuli</i>    | <i>Ca_Kabuli_Chr01</i>       | 1461600                        | (T/C)       |
| 181         | CakSNP181      | <i>Kabuli</i>    | <i>Ca_Kabuli_Chr01</i>       | 1467056                        | (A/G)       |
| 182         | CakSNP182      | <i>Kabuli</i>    | <i>Ca_Kabuli_Chr01</i>       | 1527513                        | (A/G)       |
| 183         | CakSNP183      | <i>Kabuli</i>    | <i>Ca_Kabuli_Chr01</i>       | 1528325                        | (G/A)       |
| 184         | CakSNP184      | <i>Kabuli</i>    | <i>Ca_Kabuli_Chr01</i>       | 1533723                        | (G/A)       |
| 185         | CakSNP185      | <i>Kabuli</i>    | <i>Ca_Kabuli_Chr01</i>       | 1546679                        | (G/C)       |
| 186         | CakSNP186      | <i>Kabuli</i>    | <i>Ca_Kabuli_Chr01</i>       | 1599821                        | (A/G)       |
| 187         | CakSNP187      | <i>Kabuli</i>    | <i>Ca_Kabuli_Chr01</i>       | 1654823                        | (C/T)       |
| 188         | CakSNP188      | <i>Kabuli</i>    | <i>Ca_Kabuli_Chr01</i>       | 1654855                        | (A/C)       |
| 189         | CakSNP189      | <i>Kabuli</i>    | <i>Ca_Kabuli_Chr01</i>       | 1655018                        | (G/A)       |
| 190         | CakSNP190      | <i>Kabuli</i>    | <i>Ca_Kabuli_Chr01</i>       | 1655012                        | (G/T)       |
| 191         | CakSNP191      | <i>Kabuli</i>    | <i>Ca_Kabuli_Chr01</i>       | 1693010                        | (T/A)       |
| 192         | CakSNP192      | <i>Kabuli</i>    | <i>Ca_Kabuli_Chr01</i>       | 1693013                        | (C/T)       |
| 193         | CakSNP193      | <i>Kabuli</i>    | <i>Ca_Kabuli_Chr01</i>       | 1693022                        | (T/C)       |

| <b>S.N.</b> | <b>SNP IDs</b> | <b>Cultivars</b> | <b>Chromosomes/scaffolds</b> | <b>Physical positions (bp)</b> | <b>SNPs</b> |
|-------------|----------------|------------------|------------------------------|--------------------------------|-------------|
| 194         | CakSNP194      | <i>Kabuli</i>    | <i>Ca_Kabuli_Chr01</i>       | 1693023                        | (T/C)       |
| 195         | CakSNP195      | <i>Kabuli</i>    | <i>Ca_Kabuli_Chr01</i>       | 1693031                        | (C/A)       |
| 196         | CakSNP196      | <i>Kabuli</i>    | <i>Ca_Kabuli_Chr01</i>       | 1738179                        | (G/C)       |
| 197         | CakSNP197      | <i>Kabuli</i>    | <i>Ca_Kabuli_Chr01</i>       | 1772813                        | (T/C)       |
| 198         | CakSNP198      | <i>Kabuli</i>    | <i>Ca_Kabuli_Chr01</i>       | 1782760                        | (G/A)       |
| 199         | CakSNP199      | <i>Kabuli</i>    | <i>Ca_Kabuli_Chr01</i>       | 1782793                        | (G/T)       |
| 200         | CakSNP200      | <i>Kabuli</i>    | <i>Ca_Kabuli_Chr01</i>       | 1782808                        | (G/C)       |
| 201         | CakSNP201      | <i>Kabuli</i>    | <i>Ca_Kabuli_Chr01</i>       | 1782953                        | (G/A)       |
| 202         | CakSNP202      | <i>Kabuli</i>    | <i>Ca_Kabuli_Chr01</i>       | 1782948                        | (T/C)       |
| 203         | CakSNP203      | <i>Kabuli</i>    | <i>Ca_Kabuli_Chr01</i>       | 1782930                        | (G/A)       |
| 204         | CakSNP204      | <i>Kabuli</i>    | <i>Ca_Kabuli_Chr01</i>       | 1782929                        | (C/T)       |
| 205         | CakSNP205      | <i>Kabuli</i>    | <i>Ca_Kabuli_Chr01</i>       | 1783207                        | (G/A)       |
| 206         | CakSNP206      | <i>Kabuli</i>    | <i>Ca_Kabuli_Chr01</i>       | 1783277                        | (G/A)       |
| 207         | CakSNP207      | <i>Kabuli</i>    | <i>Ca_Kabuli_Chr01</i>       | 1783280                        | (A/C)       |
| 208         | CakSNP208      | <i>Kabuli</i>    | <i>Ca_Kabuli_Chr01</i>       | 1783342                        | (A/T)       |
| 209         | CakSNP209      | <i>Kabuli</i>    | <i>Ca_Kabuli_Chr01</i>       | 1783923                        | (C/A)       |
| 210         | CakSNP210      | <i>Kabuli</i>    | <i>Ca_Kabuli_Chr01</i>       | 1784006                        | (T/C)       |
| 211         | CakSNP211      | <i>Kabuli</i>    | <i>Ca_Kabuli_Chr01</i>       | 1788958                        | (T/A)       |
| 212         | CakSNP212      | <i>Kabuli</i>    | <i>Ca_Kabuli_Chr01</i>       | 1789087                        | (T/C)       |
| 213         | CakSNP213      | <i>Kabuli</i>    | <i>Ca_Kabuli_Chr01</i>       | 1802992                        | (C/G)       |
| 214         | CakSNP214      | <i>Kabuli</i>    | <i>Ca_Kabuli_Chr01</i>       | 1858073                        | (C/T)       |
| 215         | CakSNP215      | <i>Kabuli</i>    | <i>Ca_Kabuli_Chr01</i>       | 1858078                        | (T/C)       |
| 216         | CakSNP216      | <i>Kabuli</i>    | <i>Ca_Kabuli_Chr01</i>       | 1858084                        | (C/T)       |
| 217         | CakSNP217      | <i>Kabuli</i>    | <i>Ca_Kabuli_Chr01</i>       | 1858132                        | (T/A)       |
| 218         | CakSNP218      | <i>Kabuli</i>    | <i>Ca_Kabuli_Chr01</i>       | 1858156                        | (C/T)       |
| 219         | CakSNP219      | <i>Kabuli</i>    | <i>Ca_Kabuli_Chr01</i>       | 1858177                        | (T/C)       |
| 220         | CakSNP220      | <i>Kabuli</i>    | <i>Ca_Kabuli_Chr01</i>       | 1858159                        | (A/G)       |
| 221         | CakSNP221      | <i>Kabuli</i>    | <i>Ca_Kabuli_Chr01</i>       | 1858509                        | (C/T)       |
| 222         | CakSNP222      | <i>Kabuli</i>    | <i>Ca_Kabuli_Chr01</i>       | 1858608                        | (T/A)       |
| 223         | CakSNP223      | <i>Kabuli</i>    | <i>Ca_Kabuli_Chr01</i>       | 1858600                        | (G/A)       |
| 224         | CakSNP224      | <i>Kabuli</i>    | <i>Ca_Kabuli_Chr01</i>       | 1859789                        | (C/T)       |
| 225         | CakSNP225      | <i>Kabuli</i>    | <i>Ca_Kabuli_Chr01</i>       | 1859857                        | (A/G)       |
| 226         | CakSNP226      | <i>Kabuli</i>    | <i>Ca_Kabuli_Chr01</i>       | 1859914                        | (G/A)       |
| 227         | CakSNP227      | <i>Kabuli</i>    | <i>Ca_Kabuli_Chr01</i>       | 1859902                        | (G/A)       |
| 228         | CakSNP228      | <i>Kabuli</i>    | <i>Ca_Kabuli_Chr01</i>       | 1861696                        | (C/T)       |
| 229         | CakSNP229      | <i>Kabuli</i>    | <i>Ca_Kabuli_Chr01</i>       | 1861707                        | (T/G)       |
| 230         | CakSNP230      | <i>Kabuli</i>    | <i>Ca_Kabuli_Chr01</i>       | 1861722                        | (T/A)       |
| 231         | CakSNP231      | <i>Kabuli</i>    | <i>Ca_Kabuli_Chr01</i>       | 1861729                        | (T/C)       |
| 232         | CakSNP232      | <i>Kabuli</i>    | <i>Ca_Kabuli_Chr01</i>       | 1861837                        | (T/G)       |

| <b>S.N.</b> | <b>SNP IDs</b> | <b>Cultivars</b> | <b>Chromosomes/scaffolds</b> | <b>Physical positions (bp)</b> | <b>SNPs</b> |
|-------------|----------------|------------------|------------------------------|--------------------------------|-------------|
| 233         | CakSNP233      | <i>Kabuli</i>    | <i>Ca_Kabuli_Chr01</i>       | 1904233                        | (T/C)       |
| 234         | CakSNP234      | <i>Kabuli</i>    | <i>Ca_Kabuli_Chr01</i>       | 1904230                        | (G/T)       |
| 235         | CakSNP235      | <i>Kabuli</i>    | <i>Ca_Kabuli_Chr01</i>       | 1904365                        | (G/A)       |
| 236         | CakSNP236      | <i>Kabuli</i>    | <i>Ca_Kabuli_Chr01</i>       | 1904391                        | (A/G)       |
| 237         | CakSNP237      | <i>Kabuli</i>    | <i>Ca_Kabuli_Chr01</i>       | 1935729                        | (A/G)       |
| 238         | CakSNP238      | <i>Kabuli</i>    | <i>Ca_Kabuli_Chr01</i>       | 1962876                        | (A/G)       |
| 239         | CakSNP239      | <i>Kabuli</i>    | <i>Ca_Kabuli_Chr01</i>       | 1968828                        | (G/A)       |
| 240         | CakSNP240      | <i>Kabuli</i>    | <i>Ca_Kabuli_Chr01</i>       | 2002844                        | (G/A)       |
| 241         | CakSNP241      | <i>Kabuli</i>    | <i>Ca_Kabuli_Chr01</i>       | 2002922                        | (G/T)       |
| 242         | CakSNP242      | <i>Kabuli</i>    | <i>Ca_Kabuli_Chr01</i>       | 2040943                        | (C/T)       |
| 243         | CakSNP243      | <i>Kabuli</i>    | <i>Ca_Kabuli_Chr01</i>       | 2040946                        | (G/T)       |
| 244         | CakSNP244      | <i>Kabuli</i>    | <i>Ca_Kabuli_Chr01</i>       | 2041027                        | (C/G)       |
| 245         | CakSNP245      | <i>Kabuli</i>    | <i>Ca_Kabuli_Chr01</i>       | 2041190                        | (A/C)       |
| 246         | CakSNP246      | <i>Kabuli</i>    | <i>Ca_Kabuli_Chr01</i>       | 2041180                        | (T/C)       |
| 247         | CakSNP247      | <i>Kabuli</i>    | <i>Ca_Kabuli_Chr01</i>       | 2041178                        | (A/C)       |
| 248         | CakSNP248      | <i>Kabuli</i>    | <i>Ca_Kabuli_Chr01</i>       | 2041174                        | (C/T)       |
| 249         | CakSNP249      | <i>Kabuli</i>    | <i>Ca_Kabuli_Chr01</i>       | 2041154                        | (G/C)       |
| 250         | CakSNP250      | <i>Kabuli</i>    | <i>Ca_Kabuli_Chr01</i>       | 2041132                        | (C/T)       |
| 251         | CakSNP251      | <i>Kabuli</i>    | <i>Ca_Kabuli_Chr01</i>       | 2042071                        | (C/G)       |
| 252         | CakSNP252      | <i>Kabuli</i>    | <i>Ca_Kabuli_Chr01</i>       | 2042185                        | (T/C)       |
| 253         | CakSNP253      | <i>Kabuli</i>    | <i>Ca_Kabuli_Chr01</i>       | 2042152                        | (G/C)       |
| 254         | CakSNP254      | <i>Kabuli</i>    | <i>Ca_Kabuli_Chr01</i>       | 2042149                        | (G/T)       |
| 255         | CakSNP255      | <i>Kabuli</i>    | <i>Ca_Kabuli_Chr01</i>       | 2044338                        | (G/A)       |
| 256         | CakSNP256      | <i>Kabuli</i>    | <i>Ca_Kabuli_Chr01</i>       | 2044304                        | (A/C)       |
| 257         | CakSNP257      | <i>Kabuli</i>    | <i>Ca_Kabuli_Chr01</i>       | 2044289                        | (A/G)       |
| 258         | CakSNP258      | <i>Kabuli</i>    | <i>Ca_Kabuli_Chr01</i>       | 2044263                        | (A/C)       |
| 259         | CakSNP259      | <i>Kabuli</i>    | <i>Ca_Kabuli_Chr01</i>       | 2044359                        | (C/T)       |
| 260         | CakSNP260      | <i>Kabuli</i>    | <i>Ca_Kabuli_Chr01</i>       | 2044374                        | (C/G)       |
| 261         | CakSNP261      | <i>Kabuli</i>    | <i>Ca_Kabuli_Chr01</i>       | 2044380                        | (G/C)       |
| 262         | CakSNP262      | <i>Kabuli</i>    | <i>Ca_Kabuli_Chr01</i>       | 2044408                        | (A/C)       |
| 263         | CakSNP263      | <i>Kabuli</i>    | <i>Ca_Kabuli_Chr01</i>       | 2044414                        | (G/A)       |
| 264         | CakSNP264      | <i>Kabuli</i>    | <i>Ca_Kabuli_Chr01</i>       | 2044474                        | (A/G)       |
| 265         | CakSNP265      | <i>Kabuli</i>    | <i>Ca_Kabuli_Chr01</i>       | 2050232                        | (A/T)       |
| 266         | CakSNP266      | <i>Kabuli</i>    | <i>Ca_Kabuli_Chr01</i>       | 2050187                        | (C/G)       |
| 267         | CakSNP267      | <i>Kabuli</i>    | <i>Ca_Kabuli_Chr01</i>       | 2050479                        | (A/C)       |
| 268         | CakSNP268      | <i>Kabuli</i>    | <i>Ca_Kabuli_Chr01</i>       | 2050469                        | (T/C)       |
| 269         | CakSNP269      | <i>Kabuli</i>    | <i>Ca_Kabuli_Chr01</i>       | 2050467                        | (A/C)       |
| 270         | CakSNP270      | <i>Kabuli</i>    | <i>Ca_Kabuli_Chr01</i>       | 2050465                        | (A/G)       |
| 271         | CakSNP271      | <i>Kabuli</i>    | <i>Ca_Kabuli_Chr01</i>       | 2050463                        | (C/T)       |



| <b>S.N.</b> | <b>SNP IDs</b> | <b>Cultivars</b> | <b>Chromosomes/scaffolds</b> | <b>Physical positions (bp)</b> | <b>SNPs</b> |
|-------------|----------------|------------------|------------------------------|--------------------------------|-------------|
| 272         | CakSNP272      | <i>Kabuli</i>    | <i>Ca_Kabuli_Chr01</i>       | 2050443                        | (G/C)       |
| 273         | CakSNP273      | <i>Kabuli</i>    | <i>Ca_Kabuli_Chr01</i>       | 2050421                        | (C/T)       |
| 274         | CakSNP274      | <i>Kabuli</i>    | <i>Ca_Kabuli_Chr01</i>       | 2051360                        | (A/G)       |
| 275         | CakSNP275      | <i>Kabuli</i>    | <i>Ca_Kabuli_Chr01</i>       | 2051375                        | (G/T)       |
| 276         | CakSNP276      | <i>Kabuli</i>    | <i>Ca_Kabuli_Chr01</i>       | 2051379                        | (C/T)       |
| 277         | CakSNP277      | <i>Kabuli</i>    | <i>Ca_Kabuli_Chr01</i>       | 2053732                        | (C/T)       |
| 278         | CakSNP278      | <i>Kabuli</i>    | <i>Ca_Kabuli_Chr01</i>       | 2053744                        | (C/A)       |
| 279         | CakSNP279      | <i>Kabuli</i>    | <i>Ca_Kabuli_Chr01</i>       | 2053749                        | (T/A)       |
| 280         | CakSNP280      | <i>Kabuli</i>    | <i>Ca_Kabuli_Chr01</i>       | 2053756                        | (G/T)       |
| 281         | CakSNP281      | <i>Kabuli</i>    | <i>Ca_Kabuli_Chr01</i>       | 2053757                        | (C/T)       |
| 282         | CakSNP282      | <i>Kabuli</i>    | <i>Ca_Kabuli_Chr01</i>       | 2053758                        | (A/G)       |
| 283         | CakSNP283      | <i>Kabuli</i>    | <i>Ca_Kabuli_Chr01</i>       | 2053784                        | (C/A)       |
| 284         | CakSNP284      | <i>Kabuli</i>    | <i>Ca_Kabuli_Chr01</i>       | 2053788                        | (A/G)       |
| 285         | CakSNP285      | <i>Kabuli</i>    | <i>Ca_Kabuli_Chr01</i>       | 2053790                        | (G/A)       |
| 286         | CakSNP286      | <i>Kabuli</i>    | <i>Ca_Kabuli_Chr01</i>       | 2053808                        | (G/T)       |
| 287         | CakSNP287      | <i>Kabuli</i>    | <i>Ca_Kabuli_Chr01</i>       | 2053856                        | (T/G)       |
| 288         | CakSNP288      | <i>Kabuli</i>    | <i>Ca_Kabuli_Chr01</i>       | 2053843                        | (T/A)       |
| 289         | CakSNP289      | <i>Kabuli</i>    | <i>Ca_Kabuli_Chr01</i>       | 2053841                        | (C/A)       |
| 290         | CakSNP290      | <i>Kabuli</i>    | <i>Ca_Kabuli_Chr01</i>       | 2053840                        | (A/C)       |
| 291         | CakSNP291      | <i>Kabuli</i>    | <i>Ca_Kabuli_Chr01</i>       | 2053833                        | (T/G)       |
| 292         | CakSNP292      | <i>Kabuli</i>    | <i>Ca_Kabuli_Chr01</i>       | 2053830                        | (A/G)       |
| 293         | CakSNP293      | <i>Kabuli</i>    | <i>Ca_Kabuli_Chr01</i>       | 2053819                        | (C/A)       |
| 294         | CakSNP294      | <i>Kabuli</i>    | <i>Ca_Kabuli_Chr01</i>       | 2053818                        | (G/C)       |
| 295         | CakSNP295      | <i>Kabuli</i>    | <i>Ca_Kabuli_Chr01</i>       | 2071456                        | (T/A)       |
| 296         | CakSNP296      | <i>Kabuli</i>    | <i>Ca_Kabuli_Chr01</i>       | 2071448                        | (A/T)       |
| 297         | CakSNP297      | <i>Kabuli</i>    | <i>Ca_Kabuli_Chr01</i>       | 2071424                        | (T/A)       |
| 298         | CakSNP298      | <i>Kabuli</i>    | <i>Ca_Kabuli_Chr01</i>       | 2071708                        | (C/G)       |
| 299         | CakSNP299      | <i>Kabuli</i>    | <i>Ca_Kabuli_Chr01</i>       | 2071703                        | (A/C)       |
| 300         | CakSNP300      | <i>Kabuli</i>    | <i>Ca_Kabuli_Chr01</i>       | 2071699                        | (T/C)       |
| 301         | CakSNP301      | <i>Kabuli</i>    | <i>Ca_Kabuli_Chr01</i>       | 2071693                        | (T/C)       |
| 302         | CakSNP302      | <i>Kabuli</i>    | <i>Ca_Kabuli_Chr01</i>       | 2071691                        | (A/C)       |
| 303         | CakSNP303      | <i>Kabuli</i>    | <i>Ca_Kabuli_Chr01</i>       | 2071689                        | (A/G)       |
| 304         | CakSNP304      | <i>Kabuli</i>    | <i>Ca_Kabuli_Chr01</i>       | 2071687                        | (C/T)       |
| 305         | CakSNP305      | <i>Kabuli</i>    | <i>Ca_Kabuli_Chr01</i>       | 2071667                        | (G/C)       |
| 306         | CakSNP306      | <i>Kabuli</i>    | <i>Ca_Kabuli_Chr01</i>       | 2071645                        | (C/T)       |
| 307         | CakSNP307      | <i>Kabuli</i>    | <i>Ca_Kabuli_Chr01</i>       | 2072613                        | (G/A)       |
| 308         | CakSNP308      | <i>Kabuli</i>    | <i>Ca_Kabuli_Chr01</i>       | 2072627                        | (A/T)       |
| 309         | CakSNP309      | <i>Kabuli</i>    | <i>Ca_Kabuli_Chr01</i>       | 2074998                        | (A/C)       |
| 310         | CakSNP310      | <i>Kabuli</i>    | <i>Ca_Kabuli_Chr01</i>       | 2075087                        | (A/T)       |

| <b>S.N.</b> | <b>SNP IDs</b> | <b>Cultivars</b> | <b>Chromosomes/scaffolds</b> | <b>Physical positions (bp)</b> | <b>SNPs</b> |
|-------------|----------------|------------------|------------------------------|--------------------------------|-------------|
| 311         | CakSNP311      | <i>Kabuli</i>    | <i>Ca_Kabuli_Chr01</i>       | 2075057                        | (G/T)       |
| 312         | CakSNP312      | <i>Kabuli</i>    | <i>Ca_Kabuli_Chr01</i>       | 2075045                        | (C/A)       |
| 313         | CakSNP313      | <i>Kabuli</i>    | <i>Ca_Kabuli_Chr01</i>       | 2075044                        | (A/G)       |
| 314         | CakSNP314      | <i>Kabuli</i>    | <i>Ca_Kabuli_Chr01</i>       | 2075043                        | (C/A)       |
| 315         | CakSNP315      | <i>Kabuli</i>    | <i>Ca_Kabuli_Chr01</i>       | 2075015                        | (G/A)       |
| 316         | CakSNP316      | <i>Kabuli</i>    | <i>Ca_Kabuli_Chr01</i>       | 2075013                        | (A/G)       |
| 317         | CakSNP317      | <i>Kabuli</i>    | <i>Ca_Kabuli_Chr01</i>       | 2075009                        | (C/A)       |
| 318         | CakSNP318      | <i>Kabuli</i>    | <i>Ca_Kabuli_Chr01</i>       | 2082760                        | (C/G)       |
| 319         | CakSNP319      | <i>Kabuli</i>    | <i>Ca_Kabuli_Chr01</i>       | 2082801                        | (G/A)       |
| 320         | CakSNP320      | <i>Kabuli</i>    | <i>Ca_Kabuli_Chr01</i>       | 2083003                        | (G/C)       |
| 321         | CakSNP321      | <i>Kabuli</i>    | <i>Ca_Kabuli_Chr01</i>       | 2083059                        | (A/T)       |
| 322         | CakSNP322      | <i>Kabuli</i>    | <i>Ca_Kabuli_Chr01</i>       | 2126267                        | (G/A)       |
| 323         | CakSNP323      | <i>Kabuli</i>    | <i>Ca_Kabuli_Chr01</i>       | 2148583                        | (T/G)       |
| 324         | CakSNP324      | <i>Kabuli</i>    | <i>Ca_Kabuli_Chr01</i>       | 2170090                        | (G/C)       |
| 325         | CakSNP325      | <i>Kabuli</i>    | <i>Ca_Kabuli_Chr01</i>       | 2170935                        | (A/C)       |
| 326         | CakSNP326      | <i>Kabuli</i>    | <i>Ca_Kabuli_Chr01</i>       | 2172076                        | (T/C)       |
| 327         | CakSNP327      | <i>Kabuli</i>    | <i>Ca_Kabuli_Chr01</i>       | 2172113                        | (G/A)       |
| 328         | CakSNP328      | <i>Kabuli</i>    | <i>Ca_Kabuli_Chr01</i>       | 2172143                        | (T/G)       |
| 329         | CakSNP329      | <i>Kabuli</i>    | <i>Ca_Kabuli_Chr01</i>       | 2172149                        | (G/A)       |
| 330         | CakSNP330      | <i>Kabuli</i>    | <i>Ca_Kabuli_Chr01</i>       | 2183544                        | (A/G)       |
| 331         | CakSNP331      | <i>Kabuli</i>    | <i>Ca_Kabuli_Chr01</i>       | 2188472                        | (T/C)       |
| 332         | CakSNP332      | <i>Kabuli</i>    | <i>Ca_Kabuli_Chr01</i>       | 2232724                        | (A/G)       |
| 333         | CakSNP333      | <i>Kabuli</i>    | <i>Ca_Kabuli_Chr01</i>       | 2232764                        | (C/T)       |
| 334         | CakSNP334      | <i>Kabuli</i>    | <i>Ca_Kabuli_Chr01</i>       | 2232779                        | (A/G)       |
| 335         | CakSNP335      | <i>Kabuli</i>    | <i>Ca_Kabuli_Chr01</i>       | 2252270                        | (C/T)       |
| 336         | CakSNP336      | <i>Kabuli</i>    | <i>Ca_Kabuli_Chr01</i>       | 2252320                        | (G/T)       |
| 337         | CakSNP337      | <i>Kabuli</i>    | <i>Ca_Kabuli_Chr01</i>       | 2252328                        | (C/A)       |
| 338         | CakSNP338      | <i>Kabuli</i>    | <i>Ca_Kabuli_Chr01</i>       | 2252342                        | (C/T)       |
| 339         | CakSNP339      | <i>Kabuli</i>    | <i>Ca_Kabuli_Chr01</i>       | 2252343                        | (G/T)       |
| 340         | CakSNP340      | <i>Kabuli</i>    | <i>Ca_Kabuli_Chr01</i>       | 2252463                        | (T/C)       |
| 341         | CakSNP341      | <i>Kabuli</i>    | <i>Ca_Kabuli_Chr01</i>       | 2252401                        | (A/G)       |
| 342         | CakSNP342      | <i>Kabuli</i>    | <i>Ca_Kabuli_Chr01</i>       | 2252496                        | (C/A)       |
| 343         | CakSNP343      | <i>Kabuli</i>    | <i>Ca_Kabuli_Chr01</i>       | 2252513                        | (C/T)       |
| 344         | CakSNP344      | <i>Kabuli</i>    | <i>Ca_Kabuli_Chr01</i>       | 2269319                        | (T/G)       |
| 345         | CakSNP345      | <i>Kabuli</i>    | <i>Ca_Kabuli_Chr01</i>       | 2269489                        | (A/C)       |
| 346         | CakSNP346      | <i>Kabuli</i>    | <i>Ca_Kabuli_Chr01</i>       | 2277459                        | (G/A)       |
| 347         | CakSNP347      | <i>Kabuli</i>    | <i>Ca_Kabuli_Chr01</i>       | 2285879                        | (G/A)       |
| 348         | CakSNP348      | <i>Kabuli</i>    | <i>Ca_Kabuli_Chr01</i>       | 2287408                        | (A/T)       |
| 349         | CakSNP349      | <i>Kabuli</i>    | <i>Ca_Kabuli_Chr01</i>       | 2287478                        | (A/T)       |

| <b>S.N.</b> | <b>SNP IDs</b> | <b>Cultivars</b> | <b>Chromosomes/scaffolds</b> | <b>Physical positions (bp)</b> | <b>SNPs</b> |
|-------------|----------------|------------------|------------------------------|--------------------------------|-------------|
| 350         | CakSNP350      | <i>Kabuli</i>    | <i>Ca_Kabuli_Chr01</i>       | 2366413                        | (T/C)       |
| 351         | CakSNP351      | <i>Kabuli</i>    | <i>Ca_Kabuli_Chr01</i>       | 2366409                        | (T/A)       |
| 352         | CakSNP352      | <i>Kabuli</i>    | <i>Ca_Kabuli_Chr01</i>       | 2373166                        | (A/G)       |
| 353         | CakSNP353      | <i>Kabuli</i>    | <i>Ca_Kabuli_Chr01</i>       | 2373862                        | (G/A)       |
| 354         | CakSNP354      | <i>Kabuli</i>    | <i>Ca_Kabuli_Chr01</i>       | 2373910                        | (C/T)       |
| 355         | CakSNP355      | <i>Kabuli</i>    | <i>Ca_Kabuli_Chr01</i>       | 2373954                        | (G/T)       |
| 356         | CakSNP356      | <i>Kabuli</i>    | <i>Ca_Kabuli_Chr01</i>       | 2395842                        | (A/C)       |
| 357         | CakSNP357      | <i>Kabuli</i>    | <i>Ca_Kabuli_Chr01</i>       | 2400799                        | (T/G)       |
| 358         | CakSNP358      | <i>Kabuli</i>    | <i>Ca_Kabuli_Chr01</i>       | 2400892                        | (C/T)       |
| 359         | CakSNP359      | <i>Kabuli</i>    | <i>Ca_Kabuli_Chr01</i>       | 2428531                        | (A/G)       |
| 360         | CakSNP360      | <i>Kabuli</i>    | <i>Ca_Kabuli_Chr01</i>       | 2439915                        | (A/G)       |
| 361         | CakSNP361      | <i>Kabuli</i>    | <i>Ca_Kabuli_Chr01</i>       | 2439917                        | (G/A)       |
| 362         | CakSNP362      | <i>Kabuli</i>    | <i>Ca_Kabuli_Chr01</i>       | 2473309                        | (T/C)       |
| 363         | CakSNP363      | <i>Kabuli</i>    | <i>Ca_Kabuli_Chr01</i>       | 2513476                        | (T/A)       |
| 364         | CakSNP364      | <i>Kabuli</i>    | <i>Ca_Kabuli_Chr01</i>       | 2513516                        | (T/A)       |
| 365         | CakSNP365      | <i>Kabuli</i>    | <i>Ca_Kabuli_Chr01</i>       | 2513535                        | (T/C)       |
| 366         | CakSNP366      | <i>Kabuli</i>    | <i>Ca_Kabuli_Chr01</i>       | 2513737                        | (T/C)       |
| 367         | CakSNP367      | <i>Kabuli</i>    | <i>Ca_Kabuli_Chr01</i>       | 2513860                        | (G/A)       |
| 368         | CakSNP368      | <i>Kabuli</i>    | <i>Ca_Kabuli_Chr01</i>       | 2513854                        | (G/A)       |
| 369         | CakSNP369      | <i>Kabuli</i>    | <i>Ca_Kabuli_Chr01</i>       | 2513792                        | (A/G)       |
| 370         | CakSNP370      | <i>Kabuli</i>    | <i>Ca_Kabuli_Chr01</i>       | 2513914                        | (T/C)       |
| 371         | CakSNP371      | <i>Kabuli</i>    | <i>Ca_Kabuli_Chr01</i>       | 2542652                        | (G/A)       |
| 372         | CakSNP372      | <i>Kabuli</i>    | <i>Ca_Kabuli_Chr01</i>       | 2649822                        | (G/C)       |
| 373         | CakSNP373      | <i>Kabuli</i>    | <i>Ca_Kabuli_Chr01</i>       | 2649864                        | (C/A)       |
| 374         | CakSNP374      | <i>Kabuli</i>    | <i>Ca_Kabuli_Chr01</i>       | 2649921                        | (T/C)       |
| 375         | CakSNP375      | <i>Kabuli</i>    | <i>Ca_Kabuli_Chr01</i>       | 2649906                        | (C/T)       |
| 376         | CakSNP376      | <i>Kabuli</i>    | <i>Ca_Kabuli_Chr01</i>       | 2649974                        | (A/C)       |
| 377         | CakSNP377      | <i>Kabuli</i>    | <i>Ca_Kabuli_Chr01</i>       | 2671403                        | (G/T)       |
| 378         | CakSNP378      | <i>Kabuli</i>    | <i>Ca_Kabuli_Chr01</i>       | 2694584                        | (T/C)       |
| 379         | CakSNP379      | <i>Kabuli</i>    | <i>Ca_Kabuli_Chr01</i>       | 2745499                        | (C/A)       |
| 380         | CakSNP380      | <i>Kabuli</i>    | <i>Ca_Kabuli_Chr01</i>       | 2745514                        | (A/C)       |
| 381         | CakSNP381      | <i>Kabuli</i>    | <i>Ca_Kabuli_Chr01</i>       | 2745519                        | (G/C)       |
| 382         | CakSNP382      | <i>Kabuli</i>    | <i>Ca_Kabuli_Chr01</i>       | 2745486                        | (C/T)       |
| 383         | CakSNP383      | <i>Kabuli</i>    | <i>Ca_Kabuli_Chr01</i>       | 2754998                        | (C/T)       |
| 384         | CakSNP384      | <i>Kabuli</i>    | <i>Ca_Kabuli_Chr01</i>       | 2755012                        | (C/T)       |
| 385         | CakSNP385      | <i>Kabuli</i>    | <i>Ca_Kabuli_Chr01</i>       | 2755013                        | (T/A)       |
| 386         | CakSNP386      | <i>Kabuli</i>    | <i>Ca_Kabuli_Chr01</i>       | 2755015                        | (T/C)       |
| 387         | CakSNP387      | <i>Kabuli</i>    | <i>Ca_Kabuli_Chr01</i>       | 2755443                        | (T/A)       |
| 388         | CakSNP388      | <i>Kabuli</i>    | <i>Ca_Kabuli_Chr01</i>       | 2755455                        | (G/A)       |

| <b>S.N.</b> | <b>SNP IDs</b> | <b>Cultivars</b> | <b>Chromosomes/scaffolds</b> | <b>Physical positions (bp)</b> | <b>SNPs</b> |
|-------------|----------------|------------------|------------------------------|--------------------------------|-------------|
| 389         | CakSNP389      | <i>Kabuli</i>    | <i>Ca_Kabuli_Chr01</i>       | 2755457                        | (C/T)       |
| 390         | CakSNP390      | <i>Kabuli</i>    | <i>Ca_Kabuli_Chr01</i>       | 2755459                        | (T/G)       |
| 391         | CakSNP391      | <i>Kabuli</i>    | <i>Ca_Kabuli_Chr01</i>       | 2755465                        | (T/A)       |
| 392         | CakSNP392      | <i>Kabuli</i>    | <i>Ca_Kabuli_Chr01</i>       | 2755466                        | (C/G)       |
| 393         | CakSNP393      | <i>Kabuli</i>    | <i>Ca_Kabuli_Chr01</i>       | 2755470                        | (A/T)       |
| 394         | CakSNP394      | <i>Kabuli</i>    | <i>Ca_Kabuli_Chr01</i>       | 2755471                        | (C/A)       |
| 395         | CakSNP395      | <i>Kabuli</i>    | <i>Ca_Kabuli_Chr01</i>       | 2755489                        | (G/A)       |
| 396         | CakSNP396      | <i>Kabuli</i>    | <i>Ca_Kabuli_Chr01</i>       | 2755494                        | (T/C)       |
| 397         | CakSNP397      | <i>Kabuli</i>    | <i>Ca_Kabuli_Chr01</i>       | 2755496                        | (A/G)       |
| 398         | CakSNP398      | <i>Kabuli</i>    | <i>Ca_Kabuli_Chr01</i>       | 2755613                        | (G/T)       |
| 399         | CakSNP399      | <i>Kabuli</i>    | <i>Ca_Kabuli_Chr01</i>       | 2755604                        | (A/C)       |
| 400         | CakSNP400      | <i>Kabuli</i>    | <i>Ca_Kabuli_Chr01</i>       | 2755596                        | (C/A)       |
| 401         | CakSNP401      | <i>Kabuli</i>    | <i>Ca_Kabuli_Chr01</i>       | 2757711                        | (T/G)       |
| 402         | CakSNP402      | <i>Kabuli</i>    | <i>Ca_Kabuli_Chr01</i>       | 2757696                        | (A/G)       |
| 403         | CakSNP403      | <i>Kabuli</i>    | <i>Ca_Kabuli_Chr01</i>       | 2757693                        | (C/T)       |
| 404         | CakSNP404      | <i>Kabuli</i>    | <i>Ca_Kabuli_Chr01</i>       | 2757678                        | (A/G)       |
| 405         | CakSNP405      | <i>Kabuli</i>    | <i>Ca_Kabuli_Chr01</i>       | 2758781                        | (G/C)       |
| 406         | CakSNP406      | <i>Kabuli</i>    | <i>Ca_Kabuli_Chr01</i>       | 2758759                        | (G/C)       |
| 407         | CakSNP407      | <i>Kabuli</i>    | <i>Ca_Kabuli_Chr01</i>       | 2758750                        | (A/G)       |
| 408         | CakSNP408      | <i>Kabuli</i>    | <i>Ca_Kabuli_Chr01</i>       | 2758746                        | (G/A)       |
| 409         | CakSNP409      | <i>Kabuli</i>    | <i>Ca_Kabuli_Chr01</i>       | 2758739                        | (A/T)       |
| 410         | CakSNP410      | <i>Kabuli</i>    | <i>Ca_Kabuli_Chr01</i>       | 2758738                        | (T/G)       |
| 411         | CakSNP411      | <i>Kabuli</i>    | <i>Ca_Kabuli_Chr01</i>       | 2758859                        | (A/T)       |
| 412         | CakSNP412      | <i>Kabuli</i>    | <i>Ca_Kabuli_Chr01</i>       | 2758835                        | (T/A)       |
| 413         | CakSNP413      | <i>Kabuli</i>    | <i>Ca_Kabuli_Chr01</i>       | 2758827                        | (A/T)       |
| 414         | CakSNP414      | <i>Kabuli</i>    | <i>Ca_Kabuli_Chr01</i>       | 2787006                        | (C/T)       |
| 415         | CakSNP415      | <i>Kabuli</i>    | <i>Ca_Kabuli_Chr01</i>       | 2786994                        | (A/C)       |
| 416         | CakSNP416      | <i>Kabuli</i>    | <i>Ca_Kabuli_Chr01</i>       | 2786989                        | (T/C)       |
| 417         | CakSNP417      | <i>Kabuli</i>    | <i>Ca_Kabuli_Chr01</i>       | 2786976                        | (A/C)       |
| 418         | CakSNP418      | <i>Kabuli</i>    | <i>Ca_Kabuli_Chr01</i>       | 2786974                        | (T/C)       |
| 419         | CakSNP419      | <i>Kabuli</i>    | <i>Ca_Kabuli_Chr01</i>       | 2786970                        | (T/A)       |
| 420         | CakSNP420      | <i>Kabuli</i>    | <i>Ca_Kabuli_Chr01</i>       | 2807605                        | (G/C)       |
| 421         | CakSNP421      | <i>Kabuli</i>    | <i>Ca_Kabuli_Chr01</i>       | 2807616                        | (G/A)       |
| 422         | CakSNP422      | <i>Kabuli</i>    | <i>Ca_Kabuli_Chr01</i>       | 2808197                        | (T/C)       |
| 423         | CakSNP423      | <i>Kabuli</i>    | <i>Ca_Kabuli_Chr01</i>       | 2808170                        | (T/G)       |
| 424         | CakSNP424      | <i>Kabuli</i>    | <i>Ca_Kabuli_Chr01</i>       | 2832792                        | (G/A)       |
| 425         | CakSNP425      | <i>Kabuli</i>    | <i>Ca_Kabuli_Chr01</i>       | 2832969                        | (G/A)       |
| 426         | CakSNP426      | <i>Kabuli</i>    | <i>Ca_Kabuli_Chr01</i>       | 2832939                        | (G/T)       |
| 427         | CakSNP427      | <i>Kabuli</i>    | <i>Ca_Kabuli_Chr01</i>       | 2833448                        | (C/A)       |

| <b>S.N.</b> | <b>SNP IDs</b> | <b>Cultivars</b> | <b>Chromosomes/scaffolds</b> | <b>Physical positions (bp)</b> | <b>SNPs</b> |
|-------------|----------------|------------------|------------------------------|--------------------------------|-------------|
| 428         | CakSNP428      | <i>Kabuli</i>    | <i>Ca_Kabuli_Chr01</i>       | 2855919                        | (T/G)       |
| 429         | CakSNP429      | <i>Kabuli</i>    | <i>Ca_Kabuli_Chr01</i>       | 2855926                        | (T/A)       |
| 430         | CakSNP430      | <i>Kabuli</i>    | <i>Ca_Kabuli_Chr01</i>       | 2855927                        | (T/A)       |
| 431         | CakSNP431      | <i>Kabuli</i>    | <i>Ca_Kabuli_Chr01</i>       | 2855941                        | (T/G)       |
| 432         | CakSNP432      | <i>Kabuli</i>    | <i>Ca_Kabuli_Chr01</i>       | 2855962                        | (A/G)       |
| 433         | CakSNP433      | <i>Kabuli</i>    | <i>Ca_Kabuli_Chr01</i>       | 2855969                        | (C/T)       |
| 434         | CakSNP434      | <i>Kabuli</i>    | <i>Ca_Kabuli_Chr01</i>       | 2856003                        | (T/C)       |
| 435         | CakSNP435      | <i>Kabuli</i>    | <i>Ca_Kabuli_Chr01</i>       | 2856045                        | (C/T)       |
| 436         | CakSNP436      | <i>Kabuli</i>    | <i>Ca_Kabuli_Chr01</i>       | 2856079                        | (T/G)       |
| 437         | CakSNP437      | <i>Kabuli</i>    | <i>Ca_Kabuli_Chr01</i>       | 2856094                        | (T/G)       |
| 438         | CakSNP438      | <i>Kabuli</i>    | <i>Ca_Kabuli_Chr01</i>       | 2856120                        | (T/G)       |
| 439         | CakSNP439      | <i>Kabuli</i>    | <i>Ca_Kabuli_Chr01</i>       | 2856534                        | (T/A)       |
| 440         | CakSNP440      | <i>Kabuli</i>    | <i>Ca_Kabuli_Chr01</i>       | 2858263                        | (A/G)       |
| 441         | CakSNP441      | <i>Kabuli</i>    | <i>Ca_Kabuli_Chr01</i>       | 2858278                        | (T/A)       |
| 442         | CakSNP442      | <i>Kabuli</i>    | <i>Ca_Kabuli_Chr01</i>       | 2858287                        | (G/T)       |
| 443         | CakSNP443      | <i>Kabuli</i>    | <i>Ca_Kabuli_Chr01</i>       | 2858299                        | (C/A)       |
| 444         | CakSNP444      | <i>Kabuli</i>    | <i>Ca_Kabuli_Chr01</i>       | 2868942                        | (G/A)       |
| 445         | CakSNP445      | <i>Kabuli</i>    | <i>Ca_Kabuli_Chr01</i>       | 2881315                        | (T/C)       |
| 446         | CakSNP446      | <i>Kabuli</i>    | <i>Ca_Kabuli_Chr01</i>       | 2881321                        | (C/A)       |
| 447         | CakSNP447      | <i>Kabuli</i>    | <i>Ca_Kabuli_Chr01</i>       | 2881323                        | (A/T)       |
| 448         | CakSNP448      | <i>Kabuli</i>    | <i>Ca_Kabuli_Chr01</i>       | 2881327                        | (C/T)       |
| 449         | CakSNP449      | <i>Kabuli</i>    | <i>Ca_Kabuli_Chr01</i>       | 2881356                        | (C/A)       |
| 450         | CakSNP450      | <i>Kabuli</i>    | <i>Ca_Kabuli_Chr01</i>       | 2881357                        | (A/T)       |
| 451         | CakSNP451      | <i>Kabuli</i>    | <i>Ca_Kabuli_Chr01</i>       | 2881422                        | (T/C)       |
| 452         | CakSNP452      | <i>Kabuli</i>    | <i>Ca_Kabuli_Chr01</i>       | 2881389                        | (G/C)       |
| 453         | CakSNP453      | <i>Kabuli</i>    | <i>Ca_Kabuli_Chr01</i>       | 2881386                        | (G/T)       |
| 454         | CakSNP454      | <i>Kabuli</i>    | <i>Ca_Kabuli_Chr01</i>       | 2883625                        | (T/A)       |
| 455         | CakSNP455      | <i>Kabuli</i>    | <i>Ca_Kabuli_Chr01</i>       | 2883634                        | (T/A)       |
| 456         | CakSNP456      | <i>Kabuli</i>    | <i>Ca_Kabuli_Chr01</i>       | 2883635                        | (A/G)       |
| 457         | CakSNP457      | <i>Kabuli</i>    | <i>Ca_Kabuli_Chr01</i>       | 2883660                        | (C/G)       |
| 458         | CakSNP458      | <i>Kabuli</i>    | <i>Ca_Kabuli_Chr01</i>       | 2883666                        | (G/A)       |
| 459         | CakSNP459      | <i>Kabuli</i>    | <i>Ca_Kabuli_Chr01</i>       | 2883684                        | (G/T)       |
| 460         | CakSNP460      | <i>Kabuli</i>    | <i>Ca_Kabuli_Chr01</i>       | 2883717                        | (C/A)       |
| 461         | CakSNP461      | <i>Kabuli</i>    | <i>Ca_Kabuli_Chr01</i>       | 2883716                        | (A/C)       |
| 462         | CakSNP462      | <i>Kabuli</i>    | <i>Ca_Kabuli_Chr01</i>       | 2883709                        | (A/G)       |
| 463         | CakSNP463      | <i>Kabuli</i>    | <i>Ca_Kabuli_Chr01</i>       | 2885508                        | (T/C)       |
| 464         | CakSNP464      | <i>Kabuli</i>    | <i>Ca_Kabuli_Chr01</i>       | 2885525                        | (T/C)       |
| 465         | CakSNP465      | <i>Kabuli</i>    | <i>Ca_Kabuli_Chr01</i>       | 2885531                        | (C/T)       |
| 466         | CakSNP466      | <i>Kabuli</i>    | <i>Ca_Kabuli_Chr01</i>       | 2885626                        | (A/G)       |

| <b>S.N.</b> | <b>SNP IDs</b> | <b>Cultivars</b> | <b>Chromosomes/scaffolds</b> | <b>Physical positions (bp)</b> | <b>SNPs</b> |
|-------------|----------------|------------------|------------------------------|--------------------------------|-------------|
| 467         | CakSNP467      | <i>Kabuli</i>    | <i>Ca_Kabuli_Chr01</i>       | 2885673                        | (G/C)       |
| 468         | CakSNP468      | <i>Kabuli</i>    | <i>Ca_Kabuli_Chr01</i>       | 2885892                        | (T/A)       |
| 469         | CakSNP469      | <i>Kabuli</i>    | <i>Ca_Kabuli_Chr01</i>       | 2885906                        | (C/T)       |
| 470         | CakSNP470      | <i>Kabuli</i>    | <i>Ca_Kabuli_Chr01</i>       | 2885923                        | (C/G)       |
| 471         | CakSNP471      | <i>Kabuli</i>    | <i>Ca_Kabuli_Chr01</i>       | 2886025                        | (A/G)       |
| 472         | CakSNP472      | <i>Kabuli</i>    | <i>Ca_Kabuli_Chr01</i>       | 2886020                        | (G/T)       |
| 473         | CakSNP473      | <i>Kabuli</i>    | <i>Ca_Kabuli_Chr01</i>       | 2886015                        | (G/A)       |
| 474         | CakSNP474      | <i>Kabuli</i>    | <i>Ca_Kabuli_Chr01</i>       | 2886005                        | (G/A)       |
| 475         | CakSNP475      | <i>Kabuli</i>    | <i>Ca_Kabuli_Chr01</i>       | 2885997                        | (G/A)       |
| 476         | CakSNP476      | <i>Kabuli</i>    | <i>Ca_Kabuli_Chr01</i>       | 2885988                        | (C/G)       |
| 477         | CakSNP477      | <i>Kabuli</i>    | <i>Ca_Kabuli_Chr01</i>       | 2885987                        | (T/A)       |
| 478         | CakSNP478      | <i>Kabuli</i>    | <i>Ca_Kabuli_Chr01</i>       | 2948211                        | (C/T)       |
| 479         | CakSNP479      | <i>Kabuli</i>    | <i>Ca_Kabuli_Chr01</i>       | 3009417                        | (C/T)       |
| 480         | CakSNP480      | <i>Kabuli</i>    | <i>Ca_Kabuli_Chr01</i>       | 3032061                        | (C/A)       |
| 481         | CakSNP481      | <i>Kabuli</i>    | <i>Ca_Kabuli_Chr01</i>       | 3081723                        | (G/T)       |
| 482         | CakSNP482      | <i>Kabuli</i>    | <i>Ca_Kabuli_Chr01</i>       | 3081851                        | (T/G)       |
| 483         | CakSNP483      | <i>Kabuli</i>    | <i>Ca_Kabuli_Chr01</i>       | 3081850                        | (C/A)       |
| 484         | CakSNP484      | <i>Kabuli</i>    | <i>Ca_Kabuli_Chr01</i>       | 3082280                        | (G/A)       |
| 485         | CakSNP485      | <i>Kabuli</i>    | <i>Ca_Kabuli_Chr01</i>       | 3151007                        | (G/A)       |
| 486         | CakSNP486      | <i>Kabuli</i>    | <i>Ca_Kabuli_Chr01</i>       | 3150986                        | (T/C)       |
| 487         | CakSNP487      | <i>Kabuli</i>    | <i>Ca_Kabuli_Chr01</i>       | 3150964                        | (C/G)       |
| 488         | CakSNP488      | <i>Kabuli</i>    | <i>Ca_Kabuli_Chr01</i>       | 3259114                        | (G/A)       |
| 489         | CakSNP489      | <i>Kabuli</i>    | <i>Ca_Kabuli_Chr01</i>       | 3259117                        | (G/C)       |
| 490         | CakSNP490      | <i>Kabuli</i>    | <i>Ca_Kabuli_Chr01</i>       | 3259177                        | (G/C)       |
| 491         | CakSNP491      | <i>Kabuli</i>    | <i>Ca_Kabuli_Chr01</i>       | 3298327                        | (C/G)       |
| 492         | CakSNP492      | <i>Kabuli</i>    | <i>Ca_Kabuli_Chr01</i>       | 3298783                        | (T/G)       |
| 493         | CakSNP493      | <i>Kabuli</i>    | <i>Ca_Kabuli_Chr01</i>       | 3359148                        | (C/A)       |
| 494         | CakSNP494      | <i>Kabuli</i>    | <i>Ca_Kabuli_Chr01</i>       | 3364952                        | (A/C)       |
| 495         | CakSNP495      | <i>Kabuli</i>    | <i>Ca_Kabuli_Chr01</i>       | 3374375                        | (G/A)       |
| 496         | CakSNP496      | <i>Kabuli</i>    | <i>Ca_Kabuli_Chr01</i>       | 3427555                        | (A/C)       |
| 497         | CakSNP497      | <i>Kabuli</i>    | <i>Ca_Kabuli_Chr01</i>       | 3427649                        | (A/G)       |
| 498         | CakSNP498      | <i>Kabuli</i>    | <i>Ca_Kabuli_Chr01</i>       | 3503059                        | (C/A)       |
| 499         | CakSNP499      | <i>Kabuli</i>    | <i>Ca_Kabuli_Chr01</i>       | 3503153                        | (G/A)       |
| 500         | CakSNP500      | <i>Kabuli</i>    | <i>Ca_Kabuli_Chr01</i>       | 3542263                        | (A/C)       |
| 501         | CakSNP501      | <i>Kabuli</i>    | <i>Ca_Kabuli_Chr01</i>       | 3544948                        | (A/T)       |
| 502         | CakSNP502      | <i>Kabuli</i>    | <i>Ca_Kabuli_Chr01</i>       | 3545011                        | (G/A)       |
| 503         | CakSNP503      | <i>Kabuli</i>    | <i>Ca_Kabuli_Chr01</i>       | 3564342                        | (G/T)       |
| 504         | CakSNP504      | <i>Kabuli</i>    | <i>Ca_Kabuli_Chr01</i>       | 3596241                        | (C/T)       |
| 505         | CakSNP505      | <i>Kabuli</i>    | <i>Ca_Kabuli_Chr01</i>       | 3597842                        | (G/A)       |

| <b>S.N.</b> | <b>SNP IDs</b> | <b>Cultivars</b> | <b>Chromosomes/scaffolds</b> | <b>Physical positions (bp)</b> | <b>SNPs</b> |
|-------------|----------------|------------------|------------------------------|--------------------------------|-------------|
| 506         | CakSNP506      | <i>Kabuli</i>    | <i>Ca_Kabuli_Chr01</i>       | 3605582                        | (G/A)       |
| 507         | CakSNP507      | <i>Kabuli</i>    | <i>Ca_Kabuli_Chr01</i>       | 3605583                        | (C/T)       |
| 508         | CakSNP508      | <i>Kabuli</i>    | <i>Ca_Kabuli_Chr01</i>       | 3609580                        | (T/C)       |
| 509         | CakSNP509      | <i>Kabuli</i>    | <i>Ca_Kabuli_Chr01</i>       | 3611231                        | (C/A)       |
| 510         | CakSNP510      | <i>Kabuli</i>    | <i>Ca_Kabuli_Chr01</i>       | 3614966                        | (A/G)       |
| 511         | CakSNP511      | <i>Kabuli</i>    | <i>Ca_Kabuli_Chr01</i>       | 3615037                        | (G/T)       |
| 512         | CakSNP512      | <i>Kabuli</i>    | <i>Ca_Kabuli_Chr01</i>       | 3615064                        | (T/C)       |
| 513         | CakSNP513      | <i>Kabuli</i>    | <i>Ca_Kabuli_Chr01</i>       | 3615052                        | (C/A)       |
| 514         | CakSNP514      | <i>Kabuli</i>    | <i>Ca_Kabuli_Chr01</i>       | 3622757                        | (C/T)       |
| 515         | CakSNP515      | <i>Kabuli</i>    | <i>Ca_Kabuli_Chr01</i>       | 3711498                        | (T/G)       |
| 516         | CakSNP516      | <i>Kabuli</i>    | <i>Ca_Kabuli_Chr01</i>       | 3711525                        | (T/G)       |
| 517         | CakSNP517      | <i>Kabuli</i>    | <i>Ca_Kabuli_Chr01</i>       | 3751865                        | (G/T)       |
| 518         | CakSNP518      | <i>Kabuli</i>    | <i>Ca_Kabuli_Chr01</i>       | 3777223                        | (C/T)       |
| 519         | CakSNP519      | <i>Kabuli</i>    | <i>Ca_Kabuli_Chr01</i>       | 3810931                        | (T/C)       |
| 520         | CakSNP520      | <i>Kabuli</i>    | <i>Ca_Kabuli_Chr01</i>       | 3852035                        | (A/C)       |
| 521         | CakSNP521      | <i>Kabuli</i>    | <i>Ca_Kabuli_Chr01</i>       | 3852476                        | (A/C)       |
| 522         | CakSNP522      | <i>Kabuli</i>    | <i>Ca_Kabuli_Chr01</i>       | 3853408                        | (T/C)       |
| 523         | CakSNP523      | <i>Kabuli</i>    | <i>Ca_Kabuli_Chr01</i>       | 3855229                        | (G/A)       |
| 524         | CakSNP524      | <i>Kabuli</i>    | <i>Ca_Kabuli_Chr01</i>       | 3891319                        | (T/C)       |
| 525         | CakSNP525      | <i>Kabuli</i>    | <i>Ca_Kabuli_Chr01</i>       | 3911547                        | (G/A)       |
| 526         | CakSNP526      | <i>Kabuli</i>    | <i>Ca_Kabuli_Chr01</i>       | 3941250                        | (C/T)       |
| 527         | CakSNP527      | <i>Kabuli</i>    | <i>Ca_Kabuli_Chr01</i>       | 3941399                        | (T/C)       |
| 528         | CakSNP528      | <i>Kabuli</i>    | <i>Ca_Kabuli_Chr01</i>       | 3952819                        | (G/A)       |
| 529         | CakSNP529      | <i>Kabuli</i>    | <i>Ca_Kabuli_Chr01</i>       | 3956031                        | (T/C)       |
| 530         | CakSNP530      | <i>Kabuli</i>    | <i>Ca_Kabuli_Chr01</i>       | 3956028                        | (C/T)       |
| 531         | CakSNP531      | <i>Kabuli</i>    | <i>Ca_Kabuli_Chr01</i>       | 3972671                        | (G/T)       |
| 532         | CakSNP532      | <i>Kabuli</i>    | <i>Ca_Kabuli_Chr01</i>       | 4048854                        | (G/A)       |
| 533         | CakSNP533      | <i>Kabuli</i>    | <i>Ca_Kabuli_Chr01</i>       | 4048875                        | (A/T)       |
| 534         | CakSNP534      | <i>Kabuli</i>    | <i>Ca_Kabuli_Chr01</i>       | 4073941                        | (A/C)       |
| 535         | CakSNP535      | <i>Kabuli</i>    | <i>Ca_Kabuli_Chr01</i>       | 4112929                        | (A/T)       |
| 536         | CakSNP536      | <i>Kabuli</i>    | <i>Ca_Kabuli_Chr01</i>       | 4189333                        | (C/T)       |
| 537         | CakSNP537      | <i>Kabuli</i>    | <i>Ca_Kabuli_Chr01</i>       | 4189297                        | (T/C)       |
| 538         | CakSNP538      | <i>Kabuli</i>    | <i>Ca_Kabuli_Chr01</i>       | 4245058                        | (C/G)       |
| 539         | CakSNP539      | <i>Kabuli</i>    | <i>Ca_Kabuli_Chr01</i>       | 4245073                        | (C/G)       |
| 540         | CakSNP540      | <i>Kabuli</i>    | <i>Ca_Kabuli_Chr01</i>       | 4245176                        | (G/T)       |
| 541         | CakSNP541      | <i>Kabuli</i>    | <i>Ca_Kabuli_Chr01</i>       | 4292981                        | (G/C)       |
| 542         | CakSNP542      | <i>Kabuli</i>    | <i>Ca_Kabuli_Chr01</i>       | 4302669                        | (G/C)       |
| 543         | CakSNP543      | <i>Kabuli</i>    | <i>Ca_Kabuli_Chr01</i>       | 4302770                        | (A/C)       |
| 544         | CakSNP544      | <i>Kabuli</i>    | <i>Ca_Kabuli_Chr01</i>       | 4302751                        | (T/C)       |

| <b>S.N.</b> | <b>SNP IDs</b> | <b>Cultivars</b> | <b>Chromosomes/scaffolds</b> | <b>Physical positions (bp)</b> | <b>SNPs</b> |
|-------------|----------------|------------------|------------------------------|--------------------------------|-------------|
| 545         | CakSNP545      | <i>Kabuli</i>    | <i>Ca_Kabuli_Chr01</i>       | 4334299                        | (A/T)       |
| 546         | CakSNP546      | <i>Kabuli</i>    | <i>Ca_Kabuli_Chr01</i>       | 4334336                        | (A/G)       |
| 547         | CakSNP547      | <i>Kabuli</i>    | <i>Ca_Kabuli_Chr01</i>       | 4372257                        | (A/G)       |
| 548         | CakSNP548      | <i>Kabuli</i>    | <i>Ca_Kabuli_Chr01</i>       | 4375710                        | (T/C)       |
| 549         | CakSNP549      | <i>Kabuli</i>    | <i>Ca_Kabuli_Chr01</i>       | 4385002                        | (C/T)       |
| 550         | CakSNP550      | <i>Kabuli</i>    | <i>Ca_Kabuli_Chr01</i>       | 4386114                        | (T/G)       |
| 551         | CakSNP551      | <i>Kabuli</i>    | <i>Ca_Kabuli_Chr01</i>       | 4386111                        | (T/C)       |
| 552         | CakSNP552      | <i>Kabuli</i>    | <i>Ca_Kabuli_Chr01</i>       | 4392680                        | (A/G)       |
| 553         | CakSNP553      | <i>Kabuli</i>    | <i>Ca_Kabuli_Chr01</i>       | 4414410                        | (A/T)       |
| 554         | CakSNP554      | <i>Kabuli</i>    | <i>Ca_Kabuli_Chr01</i>       | 4423984                        | (A/G)       |
| 555         | CakSNP555      | <i>Kabuli</i>    | <i>Ca_Kabuli_Chr01</i>       | 4429044                        | (C/T)       |
| 556         | CakSNP556      | <i>Kabuli</i>    | <i>Ca_Kabuli_Chr01</i>       | 4432569                        | (A/G)       |
| 557         | CakSNP557      | <i>Kabuli</i>    | <i>Ca_Kabuli_Chr01</i>       | 4432549                        | (C/T)       |
| 558         | CakSNP558      | <i>Kabuli</i>    | <i>Ca_Kabuli_Chr01</i>       | 4432545                        | (C/A)       |
| 559         | CakSNP559      | <i>Kabuli</i>    | <i>Ca_Kabuli_Chr01</i>       | 4432541                        | (C/A)       |
| 560         | CakSNP560      | <i>Kabuli</i>    | <i>Ca_Kabuli_Chr01</i>       | 4456662                        | (G/A)       |
| 561         | CakSNP561      | <i>Kabuli</i>    | <i>Ca_Kabuli_Chr01</i>       | 4456654                        | (A/C)       |
| 562         | CakSNP562      | <i>Kabuli</i>    | <i>Ca_Kabuli_Chr01</i>       | 4456648                        | (T/C)       |
| 563         | CakSNP563      | <i>Kabuli</i>    | <i>Ca_Kabuli_Chr01</i>       | 4457588                        | (A/G)       |
| 564         | CakSNP564      | <i>Kabuli</i>    | <i>Ca_Kabuli_Chr01</i>       | 4460112                        | (A/T)       |
| 565         | CakSNP565      | <i>Kabuli</i>    | <i>Ca_Kabuli_Chr01</i>       | 4494270                        | (C/T)       |
| 566         | CakSNP566      | <i>Kabuli</i>    | <i>Ca_Kabuli_Chr01</i>       | 4494467                        | (A/G)       |
| 567         | CakSNP567      | <i>Kabuli</i>    | <i>Ca_Kabuli_Chr01</i>       | 4512566                        | (T/C)       |
| 568         | CakSNP568      | <i>Kabuli</i>    | <i>Ca_Kabuli_Chr01</i>       | 4528117                        | (A/G)       |
| 569         | CakSNP569      | <i>Kabuli</i>    | <i>Ca_Kabuli_Chr01</i>       | 4528184                        | (C/T)       |
| 570         | CakSNP570      | <i>Kabuli</i>    | <i>Ca_Kabuli_Chr01</i>       | 4530304                        | (T/C)       |
| 571         | CakSNP571      | <i>Kabuli</i>    | <i>Ca_Kabuli_Chr01</i>       | 4560792                        | (C/T)       |
| 572         | CakSNP572      | <i>Kabuli</i>    | <i>Ca_Kabuli_Chr01</i>       | 4560920                        | (G/A)       |
| 573         | CakSNP573      | <i>Kabuli</i>    | <i>Ca_Kabuli_Chr01</i>       | 4569669                        | (T/A)       |
| 574         | CakSNP574      | <i>Kabuli</i>    | <i>Ca_Kabuli_Chr01</i>       | 4569670                        | (T/A)       |
| 575         | CakSNP575      | <i>Kabuli</i>    | <i>Ca_Kabuli_Chr01</i>       | 4569690                        | (A/G)       |
| 576         | CakSNP576      | <i>Kabuli</i>    | <i>Ca_Kabuli_Chr01</i>       | 4571615                        | (T/C)       |
| 577         | CakSNP577      | <i>Kabuli</i>    | <i>Ca_Kabuli_Chr01</i>       | 4571540                        | (C/G)       |
| 578         | CakSNP578      | <i>Kabuli</i>    | <i>Ca_Kabuli_Chr01</i>       | 4571539                        | (G/A)       |
| 579         | CakSNP579      | <i>Kabuli</i>    | <i>Ca_Kabuli_Chr01</i>       | 4576888                        | (A/G)       |
| 580         | CakSNP580      | <i>Kabuli</i>    | <i>Ca_Kabuli_Chr01</i>       | 4578967                        | (T/G)       |
| 581         | CakSNP581      | <i>Kabuli</i>    | <i>Ca_Kabuli_Chr01</i>       | 4578999                        | (T/A)       |
| 582         | CakSNP582      | <i>Kabuli</i>    | <i>Ca_Kabuli_Chr01</i>       | 4582189                        | (C/T)       |
| 583         | CakSNP583      | <i>Kabuli</i>    | <i>Ca_Kabuli_Chr01</i>       | 4626099                        | (T/G)       |



| <b>S.N.</b> | <b>SNP IDs</b> | <b>Cultivars</b> | <b>Chromosomes/scaffolds</b> | <b>Physical positions (bp)</b> | <b>SNPs</b> |
|-------------|----------------|------------------|------------------------------|--------------------------------|-------------|
| 584         | CakSNP584      | <i>Kabuli</i>    | <i>Ca_Kabuli_Chr01</i>       | 4626098                        | (C/G)       |
| 585         | CakSNP585      | <i>Kabuli</i>    | <i>Ca_Kabuli_Chr01</i>       | 4631467                        | (G/A)       |
| 586         | CakSNP586      | <i>Kabuli</i>    | <i>Ca_Kabuli_Chr01</i>       | 4632188                        | (G/A)       |
| 587         | CakSNP587      | <i>Kabuli</i>    | <i>Ca_Kabuli_Chr01</i>       | 4632965                        | (G/A)       |
| 588         | CakSNP588      | <i>Kabuli</i>    | <i>Ca_Kabuli_Chr01</i>       | 4634413                        | (C/T)       |
| 589         | CakSNP589      | <i>Kabuli</i>    | <i>Ca_Kabuli_Chr01</i>       | 4635347                        | (G/A)       |
| 590         | CakSNP590      | <i>Kabuli</i>    | <i>Ca_Kabuli_Chr01</i>       | 4635302                        | (A/C)       |
| 591         | CakSNP591      | <i>Kabuli</i>    | <i>Ca_Kabuli_Chr01</i>       | 4662564                        | (A/G)       |
| 592         | CakSNP592      | <i>Kabuli</i>    | <i>Ca_Kabuli_Chr01</i>       | 4672439                        | (G/A)       |
| 593         | CakSNP593      | <i>Kabuli</i>    | <i>Ca_Kabuli_Chr01</i>       | 4715563                        | (T/C)       |
| 594         | CakSNP594      | <i>Kabuli</i>    | <i>Ca_Kabuli_Chr01</i>       | 4780330                        | (C/T)       |
| 595         | CakSNP595      | <i>Kabuli</i>    | <i>Ca_Kabuli_Chr01</i>       | 4780345                        | (G/T)       |
| 596         | CakSNP596      | <i>Kabuli</i>    | <i>Ca_Kabuli_Chr01</i>       | 4781362                        | (C/T)       |
| 597         | CakSNP597      | <i>Kabuli</i>    | <i>Ca_Kabuli_Chr01</i>       | 4781416                        | (G/A)       |
| 598         | CakSNP598      | <i>Kabuli</i>    | <i>Ca_Kabuli_Chr01</i>       | 4781704                        | (G/A)       |
| 599         | CakSNP599      | <i>Kabuli</i>    | <i>Ca_Kabuli_Chr01</i>       | 4808910                        | (A/T)       |
| 600         | CakSNP600      | <i>Kabuli</i>    | <i>Ca_Kabuli_Chr01</i>       | 4878683                        | (T/C)       |
| 601         | CakSNP601      | <i>Kabuli</i>    | <i>Ca_Kabuli_Chr01</i>       | 4878691                        | (A/C)       |
| 602         | CakSNP602      | <i>Kabuli</i>    | <i>Ca_Kabuli_Chr01</i>       | 4878695                        | (T/C)       |
| 603         | CakSNP603      | <i>Kabuli</i>    | <i>Ca_Kabuli_Chr01</i>       | 4878823                        | (A/G)       |
| 604         | CakSNP604      | <i>Kabuli</i>    | <i>Ca_Kabuli_Chr01</i>       | 4903185                        | (T/A)       |
| 605         | CakSNP605      | <i>Kabuli</i>    | <i>Ca_Kabuli_Chr01</i>       | 4903203                        | (A/G)       |
| 606         | CakSNP606      | <i>Kabuli</i>    | <i>Ca_Kabuli_Chr01</i>       | 4903239                        | (G/A)       |
| 607         | CakSNP607      | <i>Kabuli</i>    | <i>Ca_Kabuli_Chr01</i>       | 4906759                        | (G/C)       |
| 608         | CakSNP608      | <i>Kabuli</i>    | <i>Ca_Kabuli_Chr01</i>       | 4906775                        | (A/T)       |
| 609         | CakSNP609      | <i>Kabuli</i>    | <i>Ca_Kabuli_Chr01</i>       | 4906777                        | (G/T)       |
| 610         | CakSNP610      | <i>Kabuli</i>    | <i>Ca_Kabuli_Chr01</i>       | 4906778                        | (T/G)       |
| 611         | CakSNP611      | <i>Kabuli</i>    | <i>Ca_Kabuli_Chr01</i>       | 4906800                        | (T/G)       |
| 612         | CakSNP612      | <i>Kabuli</i>    | <i>Ca_Kabuli_Chr01</i>       | 4906816                        | (A/G)       |
| 613         | CakSNP613      | <i>Kabuli</i>    | <i>Ca_Kabuli_Chr01</i>       | 4906868                        | (G/C)       |
| 614         | CakSNP614      | <i>Kabuli</i>    | <i>Ca_Kabuli_Chr01</i>       | 4906859                        | (T/C)       |
| 615         | CakSNP615      | <i>Kabuli</i>    | <i>Ca_Kabuli_Chr01</i>       | 4906854                        | (A/G)       |
| 616         | CakSNP616      | <i>Kabuli</i>    | <i>Ca_Kabuli_Chr01</i>       | 4909155                        | (T/C)       |
| 617         | CakSNP617      | <i>Kabuli</i>    | <i>Ca_Kabuli_Chr01</i>       | 4909286                        | (T/G)       |
| 618         | CakSNP618      | <i>Kabuli</i>    | <i>Ca_Kabuli_Chr01</i>       | 4909280                        | (T/G)       |
| 619         | CakSNP619      | <i>Kabuli</i>    | <i>Ca_Kabuli_Chr01</i>       | 4909271                        | (A/G)       |
| 620         | CakSNP620      | <i>Kabuli</i>    | <i>Ca_Kabuli_Chr01</i>       | 4909268                        | (C/T)       |
| 621         | CakSNP621      | <i>Kabuli</i>    | <i>Ca_Kabuli_Chr01</i>       | 4909261                        | (G/T)       |
| 622         | CakSNP622      | <i>Kabuli</i>    | <i>Ca_Kabuli_Chr01</i>       | 4909255                        | (G/A)       |

| <b>S.N.</b> | <b>SNP IDs</b> | <b>Cultivars</b> | <b>Chromosomes/scaffolds</b> | <b>Physical positions (bp)</b> | <b>SNPs</b> |
|-------------|----------------|------------------|------------------------------|--------------------------------|-------------|
| 623         | CakSNP623      | <i>Kabuli</i>    | <i>Ca_Kabuli_Chr01</i>       | 4909253                        | (A/G)       |
| 624         | CakSNP624      | <i>Kabuli</i>    | <i>Ca_Kabuli_Chr01</i>       | 4910497                        | (A/G)       |
| 625         | CakSNP625      | <i>Kabuli</i>    | <i>Ca_Kabuli_Chr01</i>       | 4910494                        | (C/A)       |
| 626         | CakSNP626      | <i>Kabuli</i>    | <i>Ca_Kabuli_Chr01</i>       | 4948740                        | (A/T)       |
| 627         | CakSNP627      | <i>Kabuli</i>    | <i>Ca_Kabuli_Chr01</i>       | 4949578                        | (A/T)       |
| 628         | CakSNP628      | <i>Kabuli</i>    | <i>Ca_Kabuli_Chr01</i>       | 4950457                        | (G/A)       |
| 629         | CakSNP629      | <i>Kabuli</i>    | <i>Ca_Kabuli_Chr01</i>       | 4950726                        | (G/T)       |
| 630         | CakSNP630      | <i>Kabuli</i>    | <i>Ca_Kabuli_Chr01</i>       | 4959562                        | (A/C)       |
| 631         | CakSNP631      | <i>Kabuli</i>    | <i>Ca_Kabuli_Chr01</i>       | 4995240                        | (T/A)       |
| 632         | CakSNP632      | <i>Kabuli</i>    | <i>Ca_Kabuli_Chr01</i>       | 4996404                        | (A/C)       |
| 633         | CakSNP633      | <i>Kabuli</i>    | <i>Ca_Kabuli_Chr01</i>       | 4996459                        | (T/C)       |
| 634         | CakSNP634      | <i>Kabuli</i>    | <i>Ca_Kabuli_Chr01</i>       | 4996476                        | (G/A)       |
| 635         | CakSNP635      | <i>Kabuli</i>    | <i>Ca_Kabuli_Chr01</i>       | 4996536                        | (C/T)       |
| 636         | CakSNP636      | <i>Kabuli</i>    | <i>Ca_Kabuli_Chr01</i>       | 5071210                        | (A/G)       |
| 637         | CakSNP637      | <i>Kabuli</i>    | <i>Ca_Kabuli_Chr01</i>       | 5071195                        | (T/A)       |
| 638         | CakSNP638      | <i>Kabuli</i>    | <i>Ca_Kabuli_Chr01</i>       | 5071177                        | (A/G)       |
| 639         | CakSNP639      | <i>Kabuli</i>    | <i>Ca_Kabuli_Chr01</i>       | 5071158                        | (G/A)       |
| 640         | CakSNP640      | <i>Kabuli</i>    | <i>Ca_Kabuli_Chr01</i>       | 5072022                        | (C/A)       |
| 641         | CakSNP641      | <i>Kabuli</i>    | <i>Ca_Kabuli_Chr01</i>       | 5080342                        | (A/T)       |
| 642         | CakSNP642      | <i>Kabuli</i>    | <i>Ca_Kabuli_Chr01</i>       | 5080358                        | (G/A)       |
| 643         | CakSNP643      | <i>Kabuli</i>    | <i>Ca_Kabuli_Chr01</i>       | 5087428                        | (T/C)       |
| 644         | CakSNP644      | <i>Kabuli</i>    | <i>Ca_Kabuli_Chr01</i>       | 5096676                        | (A/T)       |
| 645         | CakSNP645      | <i>Kabuli</i>    | <i>Ca_Kabuli_Chr01</i>       | 5096650                        | (C/T)       |
| 646         | CakSNP646      | <i>Kabuli</i>    | <i>Ca_Kabuli_Chr01</i>       | 5122663                        | (A/G)       |
| 647         | CakSNP647      | <i>Kabuli</i>    | <i>Ca_Kabuli_Chr01</i>       | 5129940                        | (G/A)       |
| 648         | CakSNP648      | <i>Kabuli</i>    | <i>Ca_Kabuli_Chr01</i>       | 5138013                        | (A/C)       |
| 649         | CakSNP649      | <i>Kabuli</i>    | <i>Ca_Kabuli_Chr01</i>       | 5140801                        | (C/A)       |
| 650         | CakSNP650      | <i>Kabuli</i>    | <i>Ca_Kabuli_Chr01</i>       | 5140837                        | (A/T)       |
| 651         | CakSNP651      | <i>Kabuli</i>    | <i>Ca_Kabuli_Chr01</i>       | 5141009                        | (G/C)       |
| 652         | CakSNP652      | <i>Kabuli</i>    | <i>Ca_Kabuli_Chr01</i>       | 5140944                        | (C/G)       |
| 653         | CakSNP653      | <i>Kabuli</i>    | <i>Ca_Kabuli_Chr01</i>       | 5146658                        | (C/A)       |
| 654         | CakSNP654      | <i>Kabuli</i>    | <i>Ca_Kabuli_Chr01</i>       | 5146667                        | (T/G)       |
| 655         | CakSNP655      | <i>Kabuli</i>    | <i>Ca_Kabuli_Chr01</i>       | 5146696                        | (T/A)       |
| 656         | CakSNP656      | <i>Kabuli</i>    | <i>Ca_Kabuli_Chr01</i>       | 5164127                        | (A/G)       |
| 657         | CakSNP657      | <i>Kabuli</i>    | <i>Ca_Kabuli_Chr01</i>       | 5164136                        | (C/T)       |
| 658         | CakSNP658      | <i>Kabuli</i>    | <i>Ca_Kabuli_Chr01</i>       | 5164198                        | (C/A)       |
| 659         | CakSNP659      | <i>Kabuli</i>    | <i>Ca_Kabuli_Chr01</i>       | 5197461                        | (C/T)       |
| 660         | CakSNP660      | <i>Kabuli</i>    | <i>Ca_Kabuli_Chr01</i>       | 5197475                        | (T/A)       |
| 661         | CakSNP661      | <i>Kabuli</i>    | <i>Ca_Kabuli_Chr01</i>       | 5200250                        | (T/G)       |

| <b>S.N.</b> | <b>SNP IDs</b> | <b>Cultivars</b> | <b>Chromosomes/scaffolds</b> | <b>Physical positions (bp)</b> | <b>SNPs</b> |
|-------------|----------------|------------------|------------------------------|--------------------------------|-------------|
| 662         | CakSNP662      | <i>Kabuli</i>    | <i>Ca_Kabuli_Chr01</i>       | 5200289                        | (G/T)       |
| 663         | CakSNP663      | <i>Kabuli</i>    | <i>Ca_Kabuli_Chr01</i>       | 5249839                        | (G/A)       |
| 664         | CakSNP664      | <i>Kabuli</i>    | <i>Ca_Kabuli_Chr01</i>       | 5249846                        | (A/C)       |
| 665         | CakSNP665      | <i>Kabuli</i>    | <i>Ca_Kabuli_Chr01</i>       | 5249868                        | (G/A)       |
| 666         | CakSNP666      | <i>Kabuli</i>    | <i>Ca_Kabuli_Chr01</i>       | 5288427                        | (T/C)       |
| 667         | CakSNP667      | <i>Kabuli</i>    | <i>Ca_Kabuli_Chr01</i>       | 5288421                        | (A/C)       |
| 668         | CakSNP668      | <i>Kabuli</i>    | <i>Ca_Kabuli_Chr01</i>       | 5304576                        | (A/C)       |
| 669         | CakSNP669      | <i>Kabuli</i>    | <i>Ca_Kabuli_Chr01</i>       | 5321398                        | (A/G)       |
| 670         | CakSNP670      | <i>Kabuli</i>    | <i>Ca_Kabuli_Chr01</i>       | 5430700                        | (A/C)       |
| 671         | CakSNP671      | <i>Kabuli</i>    | <i>Ca_Kabuli_Chr01</i>       | 5430703                        | (T/G)       |
| 672         | CakSNP672      | <i>Kabuli</i>    | <i>Ca_Kabuli_Chr01</i>       | 5430809                        | (G/A)       |
| 673         | CakSNP673      | <i>Kabuli</i>    | <i>Ca_Kabuli_Chr01</i>       | 5444130                        | (A/C)       |
| 674         | CakSNP674      | <i>Kabuli</i>    | <i>Ca_Kabuli_Chr01</i>       | 5444142                        | (A/T)       |
| 675         | CakSNP675      | <i>Kabuli</i>    | <i>Ca_Kabuli_Chr01</i>       | 5474604                        | (G/A)       |
| 676         | CakSNP676      | <i>Kabuli</i>    | <i>Ca_Kabuli_Chr01</i>       | 5477196                        | (T/C)       |
| 677         | CakSNP677      | <i>Kabuli</i>    | <i>Ca_Kabuli_Chr01</i>       | 5487535                        | (A/G)       |
| 678         | CakSNP678      | <i>Kabuli</i>    | <i>Ca_Kabuli_Chr01</i>       | 5489806                        | (C/G)       |
| 679         | CakSNP679      | <i>Kabuli</i>    | <i>Ca_Kabuli_Chr01</i>       | 5577080                        | (T/C)       |
| 680         | CakSNP680      | <i>Kabuli</i>    | <i>Ca_Kabuli_Chr01</i>       | 5629027                        | (G/A)       |
| 681         | CakSNP681      | <i>Kabuli</i>    | <i>Ca_Kabuli_Chr01</i>       | 5637388                        | (T/A)       |
| 682         | CakSNP682      | <i>Kabuli</i>    | <i>Ca_Kabuli_Chr01</i>       | 5637442                        | (C/T)       |
| 683         | CakSNP683      | <i>Kabuli</i>    | <i>Ca_Kabuli_Chr01</i>       | 5643313                        | (G/C)       |
| 684         | CakSNP684      | <i>Kabuli</i>    | <i>Ca_Kabuli_Chr01</i>       | 5666178                        | (A/C)       |
| 685         | CakSNP685      | <i>Kabuli</i>    | <i>Ca_Kabuli_Chr01</i>       | 5666217                        | (C/A)       |
| 686         | CakSNP686      | <i>Kabuli</i>    | <i>Ca_Kabuli_Chr01</i>       | 5666260                        | (T/G)       |
| 687         | CakSNP687      | <i>Kabuli</i>    | <i>Ca_Kabuli_Chr01</i>       | 5666266                        | (T/G)       |
| 688         | CakSNP688      | <i>Kabuli</i>    | <i>Ca_Kabuli_Chr01</i>       | 5666263                        | (T/G)       |
| 689         | CakSNP689      | <i>Kabuli</i>    | <i>Ca_Kabuli_Chr01</i>       | 5666355                        | (T/G)       |
| 690         | CakSNP690      | <i>Kabuli</i>    | <i>Ca_Kabuli_Chr01</i>       | 5667605                        | (G/A)       |
| 691         | CakSNP691      | <i>Kabuli</i>    | <i>Ca_Kabuli_Chr01</i>       | 5702638                        | (C/T)       |
| 692         | CakSNP692      | <i>Kabuli</i>    | <i>Ca_Kabuli_Chr01</i>       | 5706858                        | (A/T)       |
| 693         | CakSNP693      | <i>Kabuli</i>    | <i>Ca_Kabuli_Chr01</i>       | 5706961                        | (G/T)       |
| 694         | CakSNP694      | <i>Kabuli</i>    | <i>Ca_Kabuli_Chr01</i>       | 5706948                        | (A/T)       |
| 695         | CakSNP695      | <i>Kabuli</i>    | <i>Ca_Kabuli_Chr01</i>       | 5706944                        | (T/G)       |
| 696         | CakSNP696      | <i>Kabuli</i>    | <i>Ca_Kabuli_Chr01</i>       | 5706920                        | (G/A)       |
| 697         | CakSNP697      | <i>Kabuli</i>    | <i>Ca_Kabuli_Chr01</i>       | 5721616                        | (A/T)       |
| 698         | CakSNP698      | <i>Kabuli</i>    | <i>Ca_Kabuli_Chr01</i>       | 5749456                        | (C/T)       |
| 699         | CakSNP699      | <i>Kabuli</i>    | <i>Ca_Kabuli_Chr01</i>       | 5791118                        | (T/G)       |
| 700         | CakSNP700      | <i>Kabuli</i>    | <i>Ca_Kabuli_Chr01</i>       | 5796146                        | (C/T)       |

| <b>S.N.</b> | <b>SNP IDs</b> | <b>Cultivars</b> | <b>Chromosomes/scaffolds</b> | <b>Physical positions (bp)</b> | <b>SNPs</b> |
|-------------|----------------|------------------|------------------------------|--------------------------------|-------------|
| 701         | CakSNP701      | <i>Kabuli</i>    | <i>Ca_Kabuli_Chr01</i>       | 5796886                        | (A/G)       |
| 702         | CakSNP702      | <i>Kabuli</i>    | <i>Ca_Kabuli_Chr01</i>       | 5807492                        | (T/C)       |
| 703         | CakSNP703      | <i>Kabuli</i>    | <i>Ca_Kabuli_Chr01</i>       | 5812283                        | (G/T)       |
| 704         | CakSNP704      | <i>Kabuli</i>    | <i>Ca_Kabuli_Chr01</i>       | 5812298                        | (G/A)       |
| 705         | CakSNP705      | <i>Kabuli</i>    | <i>Ca_Kabuli_Chr01</i>       | 5862565                        | (C/T)       |
| 706         | CakSNP706      | <i>Kabuli</i>    | <i>Ca_Kabuli_Chr01</i>       | 5960264                        | (T/C)       |
| 707         | CakSNP707      | <i>Kabuli</i>    | <i>Ca_Kabuli_Chr01</i>       | 5978146                        | (G/A)       |
| 708         | CakSNP708      | <i>Kabuli</i>    | <i>Ca_Kabuli_Chr01</i>       | 5978289                        | (C/T)       |
| 709         | CakSNP709      | <i>Kabuli</i>    | <i>Ca_Kabuli_Chr01</i>       | 5981127                        | (C/T)       |
| 710         | CakSNP710      | <i>Kabuli</i>    | <i>Ca_Kabuli_Chr01</i>       | 5981178                        | (A/G)       |
| 711         | CakSNP711      | <i>Kabuli</i>    | <i>Ca_Kabuli_Chr01</i>       | 6011727                        | (G/T)       |
| 712         | CakSNP712      | <i>Kabuli</i>    | <i>Ca_Kabuli_Chr01</i>       | 6011697                        | (T/G)       |
| 713         | CakSNP713      | <i>Kabuli</i>    | <i>Ca_Kabuli_Chr01</i>       | 6011689                        | (G/A)       |
| 714         | CakSNP714      | <i>Kabuli</i>    | <i>Ca_Kabuli_Chr01</i>       | 6011657                        | (T/C)       |
| 715         | CakSNP715      | <i>Kabuli</i>    | <i>Ca_Kabuli_Chr01</i>       | 6011761                        | (C/T)       |
| 716         | CakSNP716      | <i>Kabuli</i>    | <i>Ca_Kabuli_Chr01</i>       | 6017854                        | (A/C)       |
| 717         | CakSNP717      | <i>Kabuli</i>    | <i>Ca_Kabuli_Chr01</i>       | 6066972                        | (C/T)       |
| 718         | CakSNP718      | <i>Kabuli</i>    | <i>Ca_Kabuli_Chr01</i>       | 6066936                        | (A/G)       |
| 719         | CakSNP719      | <i>Kabuli</i>    | <i>Ca_Kabuli_Chr01</i>       | 6066933                        | (C/T)       |
| 720         | CakSNP720      | <i>Kabuli</i>    | <i>Ca_Kabuli_Chr01</i>       | 6067846                        | (T/C)       |
| 721         | CakSNP721      | <i>Kabuli</i>    | <i>Ca_Kabuli_Chr01</i>       | 6088283                        | (C/T)       |
| 722         | CakSNP722      | <i>Kabuli</i>    | <i>Ca_Kabuli_Chr01</i>       | 6101205                        | (C/T)       |
| 723         | CakSNP723      | <i>Kabuli</i>    | <i>Ca_Kabuli_Chr01</i>       | 6126761                        | (T/A)       |
| 724         | CakSNP724      | <i>Kabuli</i>    | <i>Ca_Kabuli_Chr01</i>       | 6126772                        | (G/A)       |
| 725         | CakSNP725      | <i>Kabuli</i>    | <i>Ca_Kabuli_Chr01</i>       | 6155341                        | (A/G)       |
| 726         | CakSNP726      | <i>Kabuli</i>    | <i>Ca_Kabuli_Chr01</i>       | 6224010                        | (C/G)       |
| 727         | CakSNP727      | <i>Kabuli</i>    | <i>Ca_Kabuli_Chr01</i>       | 6224015                        | (C/T)       |
| 728         | CakSNP728      | <i>Kabuli</i>    | <i>Ca_Kabuli_Chr01</i>       | 6249062                        | (T/C)       |
| 729         | CakSNP729      | <i>Kabuli</i>    | <i>Ca_Kabuli_Chr01</i>       | 6249035                        | (T/C)       |
| 730         | CakSNP730      | <i>Kabuli</i>    | <i>Ca_Kabuli_Chr01</i>       | 6257653                        | (C/G)       |
| 731         | CakSNP731      | <i>Kabuli</i>    | <i>Ca_Kabuli_Chr01</i>       | 6257712                        | (A/T)       |
| 732         | CakSNP732      | <i>Kabuli</i>    | <i>Ca_Kabuli_Chr01</i>       | 6259458                        | (T/C)       |
| 733         | CakSNP733      | <i>Kabuli</i>    | <i>Ca_Kabuli_Chr01</i>       | 6262461                        | (A/G)       |
| 734         | CakSNP734      | <i>Kabuli</i>    | <i>Ca_Kabuli_Chr01</i>       | 6262529                        | (T/G)       |
| 735         | CakSNP735      | <i>Kabuli</i>    | <i>Ca_Kabuli_Chr01</i>       | 6262577                        | (A/G)       |
| 736         | CakSNP736      | <i>Kabuli</i>    | <i>Ca_Kabuli_Chr01</i>       | 6278572                        | (T/C)       |
| 737         | CakSNP737      | <i>Kabuli</i>    | <i>Ca_Kabuli_Chr01</i>       | 6278625                        | (T/C)       |
| 738         | CakSNP738      | <i>Kabuli</i>    | <i>Ca_Kabuli_Chr01</i>       | 6279644                        | (G/T)       |
| 739         | CakSNP739      | <i>Kabuli</i>    | <i>Ca_Kabuli_Chr01</i>       | 6296858                        | (G/A)       |

| <b>S.N.</b> | <b>SNP IDs</b> | <b>Cultivars</b> | <b>Chromosomes/scaffolds</b> | <b>Physical positions (bp)</b> | <b>SNPs</b> |
|-------------|----------------|------------------|------------------------------|--------------------------------|-------------|
| 740         | CakSNP740      | <i>Kabuli</i>    | <i>Ca_Kabuli_Chr01</i>       | 6296986                        | (C/A)       |
| 741         | CakSNP741      | <i>Kabuli</i>    | <i>Ca_Kabuli_Chr01</i>       | 6296929                        | (C/T)       |
| 742         | CakSNP742      | <i>Kabuli</i>    | <i>Ca_Kabuli_Chr01</i>       | 6315337                        | (G/T)       |
| 743         | CakSNP743      | <i>Kabuli</i>    | <i>Ca_Kabuli_Chr01</i>       | 6315402                        | (C/T)       |
| 744         | CakSNP744      | <i>Kabuli</i>    | <i>Ca_Kabuli_Chr01</i>       | 6315399                        | (T/G)       |
| 745         | CakSNP745      | <i>Kabuli</i>    | <i>Ca_Kabuli_Chr01</i>       | 6315397                        | (C/G)       |
| 746         | CakSNP746      | <i>Kabuli</i>    | <i>Ca_Kabuli_Chr01</i>       | 6328801                        | (T/A)       |
| 747         | CakSNP747      | <i>Kabuli</i>    | <i>Ca_Kabuli_Chr01</i>       | 6328957                        | (C/T)       |
| 748         | CakSNP748      | <i>Kabuli</i>    | <i>Ca_Kabuli_Chr01</i>       | 6328963                        | (A/G)       |
| 749         | CakSNP749      | <i>Kabuli</i>    | <i>Ca_Kabuli_Chr01</i>       | 6329805                        | (A/G)       |
| 750         | CakSNP750      | <i>Kabuli</i>    | <i>Ca_Kabuli_Chr01</i>       | 6329814                        | (T/A)       |
| 751         | CakSNP751      | <i>Kabuli</i>    | <i>Ca_Kabuli_Chr01</i>       | 6329844                        | (C/T)       |
| 752         | CakSNP752      | <i>Kabuli</i>    | <i>Ca_Kabuli_Chr01</i>       | 6329847                        | (A/G)       |
| 753         | CakSNP753      | <i>Kabuli</i>    | <i>Ca_Kabuli_Chr01</i>       | 6332229                        | (T/C)       |
| 754         | CakSNP754      | <i>Kabuli</i>    | <i>Ca_Kabuli_Chr01</i>       | 6347626                        | (C/T)       |
| 755         | CakSNP755      | <i>Kabuli</i>    | <i>Ca_Kabuli_Chr01</i>       | 6347720                        | (G/A)       |
| 756         | CakSNP756      | <i>Kabuli</i>    | <i>Ca_Kabuli_Chr01</i>       | 6381114                        | (T/G)       |
| 757         | CakSNP757      | <i>Kabuli</i>    | <i>Ca_Kabuli_Chr01</i>       | 6381191                        | (T/C)       |
| 758         | CakSNP758      | <i>Kabuli</i>    | <i>Ca_Kabuli_Chr01</i>       | 6390541                        | (T/A)       |
| 759         | CakSNP759      | <i>Kabuli</i>    | <i>Ca_Kabuli_Chr01</i>       | 6390849                        | (G/A)       |
| 760         | CakSNP760      | <i>Kabuli</i>    | <i>Ca_Kabuli_Chr01</i>       | 6391017                        | (T/C)       |
| 761         | CakSNP761      | <i>Kabuli</i>    | <i>Ca_Kabuli_Chr01</i>       | 6433592                        | (T/G)       |
| 762         | CakSNP762      | <i>Kabuli</i>    | <i>Ca_Kabuli_Chr01</i>       | 6433826                        | (G/A)       |
| 763         | CakSNP763      | <i>Kabuli</i>    | <i>Ca_Kabuli_Chr01</i>       | 6433838                        | (C/T)       |
| 764         | CakSNP764      | <i>Kabuli</i>    | <i>Ca_Kabuli_Chr01</i>       | 6433841                        | (C/T)       |
| 765         | CakSNP765      | <i>Kabuli</i>    | <i>Ca_Kabuli_Chr01</i>       | 6433883                        | (A/G)       |
| 766         | CakSNP766      | <i>Kabuli</i>    | <i>Ca_Kabuli_Chr01</i>       | 6433934                        | (T/A)       |
| 767         | CakSNP767      | <i>Kabuli</i>    | <i>Ca_Kabuli_Chr01</i>       | 6433925                        | (C/T)       |
| 768         | CakSNP768      | <i>Kabuli</i>    | <i>Ca_Kabuli_Chr01</i>       | 6478736                        | (A/G)       |
| 769         | CakSNP769      | <i>Kabuli</i>    | <i>Ca_Kabuli_Chr01</i>       | 6478758                        | (A/G)       |
| 770         | CakSNP770      | <i>Kabuli</i>    | <i>Ca_Kabuli_Chr01</i>       | 6486446                        | (G/C)       |
| 771         | CakSNP771      | <i>Kabuli</i>    | <i>Ca_Kabuli_Chr01</i>       | 6490978                        | (A/T)       |
| 772         | CakSNP772      | <i>Kabuli</i>    | <i>Ca_Kabuli_Chr01</i>       | 6491008                        | (A/T)       |
| 773         | CakSNP773      | <i>Kabuli</i>    | <i>Ca_Kabuli_Chr01</i>       | 6491030                        | (T/G)       |
| 774         | CakSNP774      | <i>Kabuli</i>    | <i>Ca_Kabuli_Chr01</i>       | 6491017                        | (T/C)       |
| 775         | CakSNP775      | <i>Kabuli</i>    | <i>Ca_Kabuli_Chr01</i>       | 6521670                        | (C/T)       |
| 776         | CakSNP776      | <i>Kabuli</i>    | <i>Ca_Kabuli_Chr01</i>       | 6521673                        | (G/A)       |
| 777         | CakSNP777      | <i>Kabuli</i>    | <i>Ca_Kabuli_Chr01</i>       | 6521856                        | (A/G)       |
| 778         | CakSNP778      | <i>Kabuli</i>    | <i>Ca_Kabuli_Chr01</i>       | 6521859                        | (T/A)       |

| <b>S.N.</b> | <b>SNP IDs</b> | <b>Cultivars</b> | <b>Chromosomes/scaffolds</b> | <b>Physical positions (bp)</b> | <b>SNPs</b> |
|-------------|----------------|------------------|------------------------------|--------------------------------|-------------|
| 779         | CakSNP779      | <i>Kabuli</i>    | <i>Ca_Kabuli_Chr01</i>       | 6521970                        | (C/T)       |
| 780         | CakSNP780      | <i>Kabuli</i>    | <i>Ca_Kabuli_Chr01</i>       | 6540056                        | (C/T)       |
| 781         | CakSNP781      | <i>Kabuli</i>    | <i>Ca_Kabuli_Chr01</i>       | 6540170                        | (G/A)       |
| 782         | CakSNP782      | <i>Kabuli</i>    | <i>Ca_Kabuli_Chr01</i>       | 6553107                        | (A/C)       |
| 783         | CakSNP783      | <i>Kabuli</i>    | <i>Ca_Kabuli_Chr01</i>       | 6564716                        | (C/T)       |
| 784         | CakSNP784      | <i>Kabuli</i>    | <i>Ca_Kabuli_Chr01</i>       | 6564789                        | (C/T)       |
| 785         | CakSNP785      | <i>Kabuli</i>    | <i>Ca_Kabuli_Chr01</i>       | 6591506                        | (G/C)       |
| 786         | CakSNP786      | <i>Kabuli</i>    | <i>Ca_Kabuli_Chr01</i>       | 6591518                        | (G/T)       |
| 787         | CakSNP787      | <i>Kabuli</i>    | <i>Ca_Kabuli_Chr01</i>       | 6599917                        | (C/A)       |
| 788         | CakSNP788      | <i>Kabuli</i>    | <i>Ca_Kabuli_Chr01</i>       | 6634482                        | (G/C)       |
| 789         | CakSNP789      | <i>Kabuli</i>    | <i>Ca_Kabuli_Chr01</i>       | 6635404                        | (C/T)       |
| 790         | CakSNP790      | <i>Kabuli</i>    | <i>Ca_Kabuli_Chr01</i>       | 6635401                        | (T/C)       |
| 791         | CakSNP791      | <i>Kabuli</i>    | <i>Ca_Kabuli_Chr01</i>       | 6635366                        | (T/C)       |
| 792         | CakSNP792      | <i>Kabuli</i>    | <i>Ca_Kabuli_Chr01</i>       | 6679253                        | (A/G)       |
| 793         | CakSNP793      | <i>Kabuli</i>    | <i>Ca_Kabuli_Chr01</i>       | 6679329                        | (A/G)       |
| 794         | CakSNP794      | <i>Kabuli</i>    | <i>Ca_Kabuli_Chr01</i>       | 6803364                        | (G/A)       |
| 795         | CakSNP795      | <i>Kabuli</i>    | <i>Ca_Kabuli_Chr01</i>       | 6804031                        | (C/T)       |
| 796         | CakSNP796      | <i>Kabuli</i>    | <i>Ca_Kabuli_Chr01</i>       | 6804110                        | (A/T)       |
| 797         | CakSNP797      | <i>Kabuli</i>    | <i>Ca_Kabuli_Chr01</i>       | 6849437                        | (C/T)       |
| 798         | CakSNP798      | <i>Kabuli</i>    | <i>Ca_Kabuli_Chr01</i>       | 6849512                        | (G/C)       |
| 799         | CakSNP799      | <i>Kabuli</i>    | <i>Ca_Kabuli_Chr01</i>       | 6879110                        | (G/C)       |
| 800         | CakSNP800      | <i>Kabuli</i>    | <i>Ca_Kabuli_Chr01</i>       | 6880666                        | (A/G)       |
| 801         | CakSNP801      | <i>Kabuli</i>    | <i>Ca_Kabuli_Chr01</i>       | 6880837                        | (A/G)       |
| 802         | CakSNP802      | <i>Kabuli</i>    | <i>Ca_Kabuli_Chr01</i>       | 6904278                        | (A/C)       |
| 803         | CakSNP803      | <i>Kabuli</i>    | <i>Ca_Kabuli_Chr01</i>       | 6904313                        | (A/C)       |
| 804         | CakSNP804      | <i>Kabuli</i>    | <i>Ca_Kabuli_Chr01</i>       | 6904338                        | (C/T)       |
| 805         | CakSNP805      | <i>Kabuli</i>    | <i>Ca_Kabuli_Chr01</i>       | 6952382                        | (G/T)       |
| 806         | CakSNP806      | <i>Kabuli</i>    | <i>Ca_Kabuli_Chr01</i>       | 7050825                        | (G/A)       |
| 807         | CakSNP807      | <i>Kabuli</i>    | <i>Ca_Kabuli_Chr01</i>       | 7050958                        | (C/T)       |
| 808         | CakSNP808      | <i>Kabuli</i>    | <i>Ca_Kabuli_Chr01</i>       | 7050953                        | (C/T)       |
| 809         | CakSNP809      | <i>Kabuli</i>    | <i>Ca_Kabuli_Chr01</i>       | 7104985                        | (G/T)       |
| 810         | CakSNP810      | <i>Kabuli</i>    | <i>Ca_Kabuli_Chr01</i>       | 7127843                        | (A/G)       |
| 811         | CakSNP811      | <i>Kabuli</i>    | <i>Ca_Kabuli_Chr01</i>       | 7136677                        | (T/C)       |
| 812         | CakSNP812      | <i>Kabuli</i>    | <i>Ca_Kabuli_Chr01</i>       | 7147651                        | (T/A)       |
| 813         | CakSNP813      | <i>Kabuli</i>    | <i>Ca_Kabuli_Chr01</i>       | 7147643                        | (A/G)       |
| 814         | CakSNP814      | <i>Kabuli</i>    | <i>Ca_Kabuli_Chr01</i>       | 7155344                        | (A/G)       |
| 815         | CakSNP815      | <i>Kabuli</i>    | <i>Ca_Kabuli_Chr01</i>       | 7155302                        | (A/G)       |
| 816         | CakSNP816      | <i>Kabuli</i>    | <i>Ca_Kabuli_Chr01</i>       | 7156354                        | (G/T)       |
| 817         | CakSNP817      | <i>Kabuli</i>    | <i>Ca_Kabuli_Chr01</i>       | 7156355                        | (A/T)       |

| <b>S.N.</b> | <b>SNP IDs</b> | <b>Cultivars</b> | <b>Chromosomes/scaffolds</b> | <b>Physical positions (bp)</b> | <b>SNPs</b> |
|-------------|----------------|------------------|------------------------------|--------------------------------|-------------|
| 818         | CakSNP818      | <i>Kabuli</i>    | <i>Ca_Kabuli_Chr01</i>       | 7157057                        | (A/C)       |
| 819         | CakSNP819      | <i>Kabuli</i>    | <i>Ca_Kabuli_Chr01</i>       | 7157112                        | (T/C)       |
| 820         | CakSNP820      | <i>Kabuli</i>    | <i>Ca_Kabuli_Chr01</i>       | 7160649                        | (T/C)       |
| 821         | CakSNP821      | <i>Kabuli</i>    | <i>Ca_Kabuli_Chr01</i>       | 7160648                        | (A/T)       |
| 822         | CakSNP822      | <i>Kabuli</i>    | <i>Ca_Kabuli_Chr01</i>       | 7160695                        | (G/A)       |
| 823         | CakSNP823      | <i>Kabuli</i>    | <i>Ca_Kabuli_Chr01</i>       | 7160698                        | (A/C)       |
| 824         | CakSNP824      | <i>Kabuli</i>    | <i>Ca_Kabuli_Chr01</i>       | 7160754                        | (A/T)       |
| 825         | CakSNP825      | <i>Kabuli</i>    | <i>Ca_Kabuli_Chr01</i>       | 7160781                        | (A/C)       |
| 826         | CakSNP826      | <i>Kabuli</i>    | <i>Ca_Kabuli_Chr01</i>       | 7160773                        | (G/A)       |
| 827         | CakSNP827      | <i>Kabuli</i>    | <i>Ca_Kabuli_Chr01</i>       | 7161122                        | (A/G)       |
| 828         | CakSNP828      | <i>Kabuli</i>    | <i>Ca_Kabuli_Chr01</i>       | 7184813                        | (A/C)       |
| 829         | CakSNP829      | <i>Kabuli</i>    | <i>Ca_Kabuli_Chr01</i>       | 7184773                        | (G/A)       |
| 830         | CakSNP830      | <i>Kabuli</i>    | <i>Ca_Kabuli_Chr01</i>       | 7187934                        | (A/G)       |
| 831         | CakSNP831      | <i>Kabuli</i>    | <i>Ca_Kabuli_Chr01</i>       | 7187969                        | (C/G)       |
| 832         | CakSNP832      | <i>Kabuli</i>    | <i>Ca_Kabuli_Chr01</i>       | 7196570                        | (T/C)       |
| 833         | CakSNP833      | <i>Kabuli</i>    | <i>Ca_Kabuli_Chr01</i>       | 7196601                        | (T/C)       |
| 834         | CakSNP834      | <i>Kabuli</i>    | <i>Ca_Kabuli_Chr01</i>       | 7231750                        | (A/C)       |
| 835         | CakSNP835      | <i>Kabuli</i>    | <i>Ca_Kabuli_Chr01</i>       | 7325164                        | (T/A)       |
| 836         | CakSNP836      | <i>Kabuli</i>    | <i>Ca_Kabuli_Chr01</i>       | 7417717                        | (G/A)       |
| 837         | CakSNP837      | <i>Kabuli</i>    | <i>Ca_Kabuli_Chr01</i>       | 7417699                        | (G/A)       |
| 838         | CakSNP838      | <i>Kabuli</i>    | <i>Ca_Kabuli_Chr01</i>       | 7417788                        | (G/A)       |
| 839         | CakSNP839      | <i>Kabuli</i>    | <i>Ca_Kabuli_Chr01</i>       | 7439421                        | (C/T)       |
| 840         | CakSNP840      | <i>Kabuli</i>    | <i>Ca_Kabuli_Chr01</i>       | 7467280                        | (A/G)       |
| 841         | CakSNP841      | <i>Kabuli</i>    | <i>Ca_Kabuli_Chr01</i>       | 7478022                        | (G/A)       |
| 842         | CakSNP842      | <i>Kabuli</i>    | <i>Ca_Kabuli_Chr01</i>       | 7478046                        | (T/G)       |
| 843         | CakSNP843      | <i>Kabuli</i>    | <i>Ca_Kabuli_Chr01</i>       | 7486102                        | (C/T)       |
| 844         | CakSNP844      | <i>Kabuli</i>    | <i>Ca_Kabuli_Chr01</i>       | 7486273                        | (T/C)       |
| 845         | CakSNP845      | <i>Kabuli</i>    | <i>Ca_Kabuli_Chr01</i>       | 7486282                        | (G/A)       |
| 846         | CakSNP846      | <i>Kabuli</i>    | <i>Ca_Kabuli_Chr01</i>       | 7497334                        | (C/A)       |
| 847         | CakSNP847      | <i>Kabuli</i>    | <i>Ca_Kabuli_Chr01</i>       | 7497362                        | (T/C)       |
| 848         | CakSNP848      | <i>Kabuli</i>    | <i>Ca_Kabuli_Chr01</i>       | 7500494                        | (T/G)       |
| 849         | CakSNP849      | <i>Kabuli</i>    | <i>Ca_Kabuli_Chr01</i>       | 7500524                        | (T/C)       |
| 850         | CakSNP850      | <i>Kabuli</i>    | <i>Ca_Kabuli_Chr01</i>       | 7500665                        | (C/A)       |
| 851         | CakSNP851      | <i>Kabuli</i>    | <i>Ca_Kabuli_Chr01</i>       | 7505779                        | (A/T)       |
| 852         | CakSNP852      | <i>Kabuli</i>    | <i>Ca_Kabuli_Chr01</i>       | 7505792                        | (A/T)       |
| 853         | CakSNP853      | <i>Kabuli</i>    | <i>Ca_Kabuli_Chr01</i>       | 7515002                        | (T/C)       |
| 854         | CakSNP854      | <i>Kabuli</i>    | <i>Ca_Kabuli_Chr01</i>       | 7515605                        | (T/C)       |
| 855         | CakSNP855      | <i>Kabuli</i>    | <i>Ca_Kabuli_Chr01</i>       | 7515578                        | (A/C)       |
| 856         | CakSNP856      | <i>Kabuli</i>    | <i>Ca_Kabuli_Chr01</i>       | 7557751                        | (T/G)       |

| <b>S.N.</b> | <b>SNP IDs</b> | <b>Cultivars</b> | <b>Chromosomes/scaffolds</b> | <b>Physical positions (bp)</b> | <b>SNPs</b> |
|-------------|----------------|------------------|------------------------------|--------------------------------|-------------|
| 857         | CakSNP857      | <i>Kabuli</i>    | <i>Ca_Kabuli_Chrom1</i>      | 7557811                        | (A/T)       |
| 858         | CakSNP858      | <i>Kabuli</i>    | <i>Ca_Kabuli_Chrom1</i>      | 7690613                        | (T/G)       |
| 859         | CakSNP859      | <i>Kabuli</i>    | <i>Ca_Kabuli_Chrom1</i>      | 7690620                        | (T/G)       |
| 860         | CakSNP860      | <i>Kabuli</i>    | <i>Ca_Kabuli_Chrom1</i>      | 7690625                        | (A/C)       |
| 861         | CakSNP861      | <i>Kabuli</i>    | <i>Ca_Kabuli_Chrom1</i>      | 7695844                        | (T/C)       |
| 862         | CakSNP862      | <i>Kabuli</i>    | <i>Ca_Kabuli_Chrom1</i>      | 7811388                        | (C/T)       |
| 863         | CakSNP863      | <i>Kabuli</i>    | <i>Ca_Kabuli_Chrom1</i>      | 7925666                        | (A/C)       |
| 864         | CakSNP864      | <i>Kabuli</i>    | <i>Ca_Kabuli_Chrom1</i>      | 7925801                        | (C/T)       |
| 865         | CakSNP865      | <i>Kabuli</i>    | <i>Ca_Kabuli_Chrom1</i>      | 7925774                        | (C/T)       |
| 866         | CakSNP866      | <i>Kabuli</i>    | <i>Ca_Kabuli_Chrom1</i>      | 7925738                        | (C/T)       |
| 867         | CakSNP867      | <i>Kabuli</i>    | <i>Ca_Kabuli_Chrom1</i>      | 7969202                        | (A/C)       |
| 868         | CakSNP868      | <i>Kabuli</i>    | <i>Ca_Kabuli_Chrom1</i>      | 7969694                        | (A/G)       |
| 869         | CakSNP869      | <i>Kabuli</i>    | <i>Ca_Kabuli_Chrom1</i>      | 7969647                        | (G/A)       |
| 870         | CakSNP870      | <i>Kabuli</i>    | <i>Ca_Kabuli_Chrom1</i>      | 8036666                        | (C/T)       |
| 871         | CakSNP871      | <i>Kabuli</i>    | <i>Ca_Kabuli_Chrom1</i>      | 8036706                        | (A/G)       |
| 872         | CakSNP872      | <i>Kabuli</i>    | <i>Ca_Kabuli_Chrom1</i>      | 8036917                        | (T/G)       |
| 873         | CakSNP873      | <i>Kabuli</i>    | <i>Ca_Kabuli_Chrom1</i>      | 8036903                        | (A/T)       |
| 874         | CakSNP874      | <i>Kabuli</i>    | <i>Ca_Kabuli_Chrom1</i>      | 8075631                        | (A/T)       |
| 875         | CakSNP875      | <i>Kabuli</i>    | <i>Ca_Kabuli_Chrom1</i>      | 8103090                        | (G/T)       |
| 876         | CakSNP876      | <i>Kabuli</i>    | <i>Ca_Kabuli_Chrom1</i>      | 8103339                        | (T/C)       |
| 877         | CakSNP877      | <i>Kabuli</i>    | <i>Ca_Kabuli_Chrom1</i>      | 8103401                        | (T/A)       |
| 878         | CakSNP878      | <i>Kabuli</i>    | <i>Ca_Kabuli_Chrom1</i>      | 8107967                        | (A/C)       |
| 879         | CakSNP879      | <i>Kabuli</i>    | <i>Ca_Kabuli_Chrom1</i>      | 8108014                        | (C/T)       |
| 880         | CakSNP880      | <i>Kabuli</i>    | <i>Ca_Kabuli_Chrom1</i>      | 8111588                        | (G/A)       |
| 881         | CakSNP881      | <i>Kabuli</i>    | <i>Ca_Kabuli_Chrom1</i>      | 8112343                        | (C/T)       |
| 882         | CakSNP882      | <i>Kabuli</i>    | <i>Ca_Kabuli_Chrom1</i>      | 8113235                        | (G/T)       |
| 883         | CakSNP883      | <i>Kabuli</i>    | <i>Ca_Kabuli_Chrom1</i>      | 8113383                        | (T/G)       |
| 884         | CakSNP884      | <i>Kabuli</i>    | <i>Ca_Kabuli_Chrom1</i>      | 8113449                        | (T/A)       |
| 885         | CakSNP885      | <i>Kabuli</i>    | <i>Ca_Kabuli_Chrom1</i>      | 8113403                        | (A/T)       |
| 886         | CakSNP886      | <i>Kabuli</i>    | <i>Ca_Kabuli_Chrom1</i>      | 8113398                        | (C/G)       |
| 887         | CakSNP887      | <i>Kabuli</i>    | <i>Ca_Kabuli_Chrom1</i>      | 8123033                        | (A/G)       |
| 888         | CakSNP888      | <i>Kabuli</i>    | <i>Ca_Kabuli_Chrom1</i>      | 8123257                        | (A/G)       |
| 889         | CakSNP889      | <i>Kabuli</i>    | <i>Ca_Kabuli_Chrom1</i>      | 8123481                        | (A/G)       |
| 890         | CakSNP890      | <i>Kabuli</i>    | <i>Ca_Kabuli_Chrom1</i>      | 8134368                        | (T/C)       |
| 891         | CakSNP891      | <i>Kabuli</i>    | <i>Ca_Kabuli_Chrom1</i>      | 8178109                        | (T/C)       |
| 892         | CakSNP892      | <i>Kabuli</i>    | <i>Ca_Kabuli_Chrom1</i>      | 8178146                        | (G/A)       |
| 893         | CakSNP893      | <i>Kabuli</i>    | <i>Ca_Kabuli_Chrom1</i>      | 8192580                        | (T/C)       |
| 894         | CakSNP894      | <i>Kabuli</i>    | <i>Ca_Kabuli_Chrom1</i>      | 8220996                        | (T/A)       |
| 895         | CakSNP895      | <i>Kabuli</i>    | <i>Ca_Kabuli_Chrom1</i>      | 8220968                        | (A/G)       |



| <b>S.N.</b> | <b>SNP IDs</b> | <b>Cultivars</b> | <b>Chromosomes/scaffolds</b> | <b>Physical positions (bp)</b> | <b>SNPs</b> |
|-------------|----------------|------------------|------------------------------|--------------------------------|-------------|
| 896         | CakSNP896      | <i>Kabuli</i>    | <i>Ca_Kabuli_Chr01</i>       | 8343356                        | (G/A)       |
| 897         | CakSNP897      | <i>Kabuli</i>    | <i>Ca_Kabuli_Chr01</i>       | 8389242                        | (G/A)       |
| 898         | CakSNP898      | <i>Kabuli</i>    | <i>Ca_Kabuli_Chr01</i>       | 8464621                        | (C/G)       |
| 899         | CakSNP899      | <i>Kabuli</i>    | <i>Ca_Kabuli_Chr01</i>       | 8582341                        | (T/C)       |
| 900         | CakSNP900      | <i>Kabuli</i>    | <i>Ca_Kabuli_Chr01</i>       | 8607820                        | (T/C)       |
| 901         | CakSNP901      | <i>Kabuli</i>    | <i>Ca_Kabuli_Chr01</i>       | 8607919                        | (A/C)       |
| 902         | CakSNP902      | <i>Kabuli</i>    | <i>Ca_Kabuli_Chr01</i>       | 8633598                        | (G/A)       |
| 903         | CakSNP903      | <i>Kabuli</i>    | <i>Ca_Kabuli_Chr01</i>       | 8665705                        | (T/G)       |
| 904         | CakSNP904      | <i>Kabuli</i>    | <i>Ca_Kabuli_Chr01</i>       | 8697177                        | (G/T)       |
| 905         | CakSNP905      | <i>Kabuli</i>    | <i>Ca_Kabuli_Chr01</i>       | 8698059                        | (T/C)       |
| 906         | CakSNP906      | <i>Kabuli</i>    | <i>Ca_Kabuli_Chr01</i>       | 8735740                        | (G/T)       |
| 907         | CakSNP907      | <i>Kabuli</i>    | <i>Ca_Kabuli_Chr01</i>       | 8735727                        | (G/C)       |
| 908         | CakSNP908      | <i>Kabuli</i>    | <i>Ca_Kabuli_Chr01</i>       | 8736733                        | (G/A)       |
| 909         | CakSNP909      | <i>Kabuli</i>    | <i>Ca_Kabuli_Chr01</i>       | 8736711                        | (G/T)       |
| 910         | CakSNP910      | <i>Kabuli</i>    | <i>Ca_Kabuli_Chr01</i>       | 8737380                        | (A/G)       |
| 911         | CakSNP911      | <i>Kabuli</i>    | <i>Ca_Kabuli_Chr01</i>       | 8738691                        | (T/G)       |
| 912         | CakSNP912      | <i>Kabuli</i>    | <i>Ca_Kabuli_Chr01</i>       | 8738695                        | (G/C)       |
| 913         | CakSNP913      | <i>Kabuli</i>    | <i>Ca_Kabuli_Chr01</i>       | 8767122                        | (T/A)       |
| 914         | CakSNP914      | <i>Kabuli</i>    | <i>Ca_Kabuli_Chr01</i>       | 8767121                        | (A/T)       |
| 915         | CakSNP915      | <i>Kabuli</i>    | <i>Ca_Kabuli_Chr01</i>       | 8799685                        | (T/G)       |
| 916         | CakSNP916      | <i>Kabuli</i>    | <i>Ca_Kabuli_Chr01</i>       | 8799701                        | (T/C)       |
| 917         | CakSNP917      | <i>Kabuli</i>    | <i>Ca_Kabuli_Chr01</i>       | 8799708                        | (T/C)       |
| 918         | CakSNP918      | <i>Kabuli</i>    | <i>Ca_Kabuli_Chr01</i>       | 8799758                        | (C/G)       |
| 919         | CakSNP919      | <i>Kabuli</i>    | <i>Ca_Kabuli_Chr01</i>       | 8809188                        | (T/A)       |
| 920         | CakSNP920      | <i>Kabuli</i>    | <i>Ca_Kabuli_Chr01</i>       | 8809191                        | (C/T)       |
| 921         | CakSNP921      | <i>Kabuli</i>    | <i>Ca_Kabuli_Chr01</i>       | 8809295                        | (A/T)       |
| 922         | CakSNP922      | <i>Kabuli</i>    | <i>Ca_Kabuli_Chr01</i>       | 8809517                        | (C/G)       |
| 923         | CakSNP923      | <i>Kabuli</i>    | <i>Ca_Kabuli_Chr01</i>       | 8822121                        | (G/T)       |
| 924         | CakSNP924      | <i>Kabuli</i>    | <i>Ca_Kabuli_Chr01</i>       | 8822375                        | (G/A)       |
| 925         | CakSNP925      | <i>Kabuli</i>    | <i>Ca_Kabuli_Chr01</i>       | 8822366                        | (T/A)       |
| 926         | CakSNP926      | <i>Kabuli</i>    | <i>Ca_Kabuli_Chr01</i>       | 8824856                        | (T/C)       |
| 927         | CakSNP927      | <i>Kabuli</i>    | <i>Ca_Kabuli_Chr01</i>       | 8852863                        | (G/T)       |
| 928         | CakSNP928      | <i>Kabuli</i>    | <i>Ca_Kabuli_Chr01</i>       | 8852928                        | (T/A)       |
| 929         | CakSNP929      | <i>Kabuli</i>    | <i>Ca_Kabuli_Chr01</i>       | 8852981                        | (C/A)       |
| 930         | CakSNP930      | <i>Kabuli</i>    | <i>Ca_Kabuli_Chr01</i>       | 8852957                        | (C/A)       |
| 931         | CakSNP931      | <i>Kabuli</i>    | <i>Ca_Kabuli_Chr01</i>       | 8852943                        | (C/A)       |
| 932         | CakSNP932      | <i>Kabuli</i>    | <i>Ca_Kabuli_Chr01</i>       | 8853010                        | (A/G)       |
| 933         | CakSNP933      | <i>Kabuli</i>    | <i>Ca_Kabuli_Chr01</i>       | 8854211                        | (G/T)       |
| 934         | CakSNP934      | <i>Kabuli</i>    | <i>Ca_Kabuli_Chr01</i>       | 8891438                        | (T/G)       |

| <b>S.N.</b> | <b>SNP IDs</b> | <b>Cultivars</b> | <b>Chromosomes/scaffolds</b> | <b>Physical positions (bp)</b> | <b>SNPs</b> |
|-------------|----------------|------------------|------------------------------|--------------------------------|-------------|
| 935         | CakSNP935      | <i>Kabuli</i>    | <i>Ca_Kabuli_Chr01</i>       | 8891485                        | (T/G)       |
| 936         | CakSNP936      | <i>Kabuli</i>    | <i>Ca_Kabuli_Chr01</i>       | 8891562                        | (C/G)       |
| 937         | CakSNP937      | <i>Kabuli</i>    | <i>Ca_Kabuli_Chr01</i>       | 8891561                        | (G/A)       |
| 938         | CakSNP938      | <i>Kabuli</i>    | <i>Ca_Kabuli_Chr01</i>       | 8893985                        | (G/A)       |
| 939         | CakSNP939      | <i>Kabuli</i>    | <i>Ca_Kabuli_Chr01</i>       | 8901769                        | (C/A)       |
| 940         | CakSNP940      | <i>Kabuli</i>    | <i>Ca_Kabuli_Chr01</i>       | 8901842                        | (T/A)       |
| 941         | CakSNP941      | <i>Kabuli</i>    | <i>Ca_Kabuli_Chr01</i>       | 8941004                        | (A/C)       |
| 942         | CakSNP942      | <i>Kabuli</i>    | <i>Ca_Kabuli_Chr01</i>       | 8941029                        | (G/A)       |
| 943         | CakSNP943      | <i>Kabuli</i>    | <i>Ca_Kabuli_Chr01</i>       | 8941031                        | (G/C)       |
| 944         | CakSNP944      | <i>Kabuli</i>    | <i>Ca_Kabuli_Chr01</i>       | 8942137                        | (T/C)       |
| 945         | CakSNP945      | <i>Kabuli</i>    | <i>Ca_Kabuli_Chr01</i>       | 8942131                        | (T/C)       |
| 946         | CakSNP946      | <i>Kabuli</i>    | <i>Ca_Kabuli_Chr01</i>       | 8942198                        | (A/G)       |
| 947         | CakSNP947      | <i>Kabuli</i>    | <i>Ca_Kabuli_Chr01</i>       | 8942179                        | (C/G)       |
| 948         | CakSNP948      | <i>Kabuli</i>    | <i>Ca_Kabuli_Chr01</i>       | 8949723                        | (G/T)       |
| 949         | CakSNP949      | <i>Kabuli</i>    | <i>Ca_Kabuli_Chr01</i>       | 8960630                        | (T/C)       |
| 950         | CakSNP950      | <i>Kabuli</i>    | <i>Ca_Kabuli_Chr01</i>       | 8969321                        | (C/T)       |
| 951         | CakSNP951      | <i>Kabuli</i>    | <i>Ca_Kabuli_Chr01</i>       | 8971718                        | (C/G)       |
| 952         | CakSNP952      | <i>Kabuli</i>    | <i>Ca_Kabuli_Chr01</i>       | 8971776                        | (A/G)       |
| 953         | CakSNP953      | <i>Kabuli</i>    | <i>Ca_Kabuli_Chr01</i>       | 8976169                        | (A/T)       |
| 954         | CakSNP954      | <i>Kabuli</i>    | <i>Ca_Kabuli_Chr01</i>       | 8980112                        | (C/A)       |
| 955         | CakSNP955      | <i>Kabuli</i>    | <i>Ca_Kabuli_Chr01</i>       | 8993300                        | (T/C)       |
| 956         | CakSNP956      | <i>Kabuli</i>    | <i>Ca_Kabuli_Chr01</i>       | 8993329                        | (A/C)       |
| 957         | CakSNP957      | <i>Kabuli</i>    | <i>Ca_Kabuli_Chr01</i>       | 9018113                        | (A/C)       |
| 958         | CakSNP958      | <i>Kabuli</i>    | <i>Ca_Kabuli_Chr01</i>       | 9031417                        | (G/T)       |
| 959         | CakSNP959      | <i>Kabuli</i>    | <i>Ca_Kabuli_Chr01</i>       | 9031825                        | (G/T)       |
| 960         | CakSNP960      | <i>Kabuli</i>    | <i>Ca_Kabuli_Chr01</i>       | 9032126                        | (G/A)       |
| 961         | CakSNP961      | <i>Kabuli</i>    | <i>Ca_Kabuli_Chr01</i>       | 9035744                        | (G/A)       |
| 962         | CakSNP962      | <i>Kabuli</i>    | <i>Ca_Kabuli_Chr01</i>       | 9040419                        | (T/A)       |
| 963         | CakSNP963      | <i>Kabuli</i>    | <i>Ca_Kabuli_Chr01</i>       | 9048675                        | (A/T)       |
| 964         | CakSNP964      | <i>Kabuli</i>    | <i>Ca_Kabuli_Chr01</i>       | 9048682                        | (T/G)       |
| 965         | CakSNP965      | <i>Kabuli</i>    | <i>Ca_Kabuli_Chr01</i>       | 9054490                        | (G/A)       |
| 966         | CakSNP966      | <i>Kabuli</i>    | <i>Ca_Kabuli_Chr01</i>       | 9065933                        | (T/C)       |
| 967         | CakSNP967      | <i>Kabuli</i>    | <i>Ca_Kabuli_Chr01</i>       | 9093812                        | (C/G)       |
| 968         | CakSNP968      | <i>Kabuli</i>    | <i>Ca_Kabuli_Chr01</i>       | 9093964                        | (T/A)       |
| 969         | CakSNP969      | <i>Kabuli</i>    | <i>Ca_Kabuli_Chr01</i>       | 9097885                        | (A/G)       |
| 970         | CakSNP970      | <i>Kabuli</i>    | <i>Ca_Kabuli_Chr01</i>       | 9097881                        | (C/G)       |
| 971         | CakSNP971      | <i>Kabuli</i>    | <i>Ca_Kabuli_Chr01</i>       | 9097879                        | (C/A)       |
| 972         | CakSNP972      | <i>Kabuli</i>    | <i>Ca_Kabuli_Chr01</i>       | 9097878                        | (A/G)       |
| 973         | CakSNP973      | <i>Kabuli</i>    | <i>Ca_Kabuli_Chr01</i>       | 9097877                        | (C/A)       |

| <b>S.N.</b> | <b>SNP IDs</b> | <b>Cultivars</b> | <b>Chromosomes/scaffolds</b> | <b>Physical positions (bp)</b> | <b>SNPs</b> |
|-------------|----------------|------------------|------------------------------|--------------------------------|-------------|
| 974         | CakSNP974      | <i>Kabuli</i>    | <i>Ca_Kabuli_Chr01</i>       | 9097869                        | (G/T)       |
| 975         | CakSNP975      | <i>Kabuli</i>    | <i>Ca_Kabuli_Chr01</i>       | 9097947                        | (C/A)       |
| 976         | CakSNP976      | <i>Kabuli</i>    | <i>Ca_Kabuli_Chr01</i>       | 9097949                        | (A/C)       |
| 977         | CakSNP977      | <i>Kabuli</i>    | <i>Ca_Kabuli_Chr01</i>       | 9098003                        | (C/T)       |
| 978         | CakSNP978      | <i>Kabuli</i>    | <i>Ca_Kabuli_Chr01</i>       | 9098051                        | (A/G)       |
| 979         | CakSNP979      | <i>Kabuli</i>    | <i>Ca_Kabuli_Chr01</i>       | 9105432                        | (C/T)       |
| 980         | CakSNP980      | <i>Kabuli</i>    | <i>Ca_Kabuli_Chr01</i>       | 9195312                        | (G/A)       |
| 981         | CakSNP981      | <i>Kabuli</i>    | <i>Ca_Kabuli_Chr01</i>       | 9237766                        | (T/G)       |
| 982         | CakSNP982      | <i>Kabuli</i>    | <i>Ca_Kabuli_Chr01</i>       | 9237813                        | (G/T)       |
| 983         | CakSNP983      | <i>Kabuli</i>    | <i>Ca_Kabuli_Chr01</i>       | 9269888                        | (T/A)       |
| 984         | CakSNP984      | <i>Kabuli</i>    | <i>Ca_Kabuli_Chr01</i>       | 9468041                        | (C/T)       |
| 985         | CakSNP985      | <i>Kabuli</i>    | <i>Ca_Kabuli_Chr01</i>       | 9468895                        | (C/A)       |
| 986         | CakSNP986      | <i>Kabuli</i>    | <i>Ca_Kabuli_Chr01</i>       | 9476207                        | (A/C)       |
| 987         | CakSNP987      | <i>Kabuli</i>    | <i>Ca_Kabuli_Chr01</i>       | 9476388                        | (A/G)       |
| 988         | CakSNP988      | <i>Kabuli</i>    | <i>Ca_Kabuli_Chr01</i>       | 9476385                        | (A/G)       |
| 989         | CakSNP989      | <i>Kabuli</i>    | <i>Ca_Kabuli_Chr01</i>       | 9535616                        | (C/T)       |
| 990         | CakSNP990      | <i>Kabuli</i>    | <i>Ca_Kabuli_Chr01</i>       | 9547223                        | (A/G)       |
| 991         | CakSNP991      | <i>Kabuli</i>    | <i>Ca_Kabuli_Chr01</i>       | 9547310                        | (A/G)       |
| 992         | CakSNP992      | <i>Kabuli</i>    | <i>Ca_Kabuli_Chr01</i>       | 9547854                        | (G/A)       |
| 993         | CakSNP993      | <i>Kabuli</i>    | <i>Ca_Kabuli_Chr01</i>       | 9547834                        | (C/T)       |
| 994         | CakSNP994      | <i>Kabuli</i>    | <i>Ca_Kabuli_Chr01</i>       | 9547819                        | (T/C)       |
| 995         | CakSNP995      | <i>Kabuli</i>    | <i>Ca_Kabuli_Chr01</i>       | 9556418                        | (C/G)       |
| 996         | CakSNP996      | <i>Kabuli</i>    | <i>Ca_Kabuli_Chr01</i>       | 9556486                        | (T/G)       |
| 997         | CakSNP997      | <i>Kabuli</i>    | <i>Ca_Kabuli_Chr01</i>       | 9556487                        | (T/A)       |
| 998         | CakSNP998      | <i>Kabuli</i>    | <i>Ca_Kabuli_Chr01</i>       | 9556488                        | (G/A)       |
| 999         | CakSNP999      | <i>Kabuli</i>    | <i>Ca_Kabuli_Chr01</i>       | 9556588                        | (G/T)       |
| 1000        | CakSNP1000     | <i>Kabuli</i>    | <i>Ca_Kabuli_Chr01</i>       | 9556604                        | (G/C)       |
| 1001        | CakSNP1001     | <i>Kabuli</i>    | <i>Ca_Kabuli_Chr01</i>       | 9556628                        | (G/A)       |
| 1002        | CakSNP1002     | <i>Kabuli</i>    | <i>Ca_Kabuli_Chr01</i>       | 9556735                        | (G/A)       |
| 1003        | CakSNP1003     | <i>Kabuli</i>    | <i>Ca_Kabuli_Chr01</i>       | 9556662                        | (C/T)       |
| 1004        | CakSNP1004     | <i>Kabuli</i>    | <i>Ca_Kabuli_Chr01</i>       | 9567049                        | (C/G)       |
| 1005        | CakSNP1005     | <i>Kabuli</i>    | <i>Ca_Kabuli_Chr01</i>       | 9603896                        | (T/A)       |
| 1006        | CakSNP1006     | <i>Kabuli</i>    | <i>Ca_Kabuli_Chr01</i>       | 9634823                        | (C/T)       |
| 1007        | CakSNP1007     | <i>Kabuli</i>    | <i>Ca_Kabuli_Chr01</i>       | 9647861                        | (G/C)       |
| 1008        | CakSNP1008     | <i>Kabuli</i>    | <i>Ca_Kabuli_Chr01</i>       | 9659316                        | (C/T)       |
| 1009        | CakSNP1009     | <i>Kabuli</i>    | <i>Ca_Kabuli_Chr01</i>       | 9705162                        | (A/C)       |
| 1010        | CakSNP1010     | <i>Kabuli</i>    | <i>Ca_Kabuli_Chr01</i>       | 9706910                        | (C/T)       |
| 1011        | CakSNP1011     | <i>Kabuli</i>    | <i>Ca_Kabuli_Chr01</i>       | 9737032                        | (C/T)       |
| 1012        | CakSNP1012     | <i>Kabuli</i>    | <i>Ca_Kabuli_Chr01</i>       | 9737067                        | (T/C)       |

| <b>S.N.</b> | <b>SNP IDs</b> | <b>Cultivars</b> | <b>Chromosomes/scaffolds</b> | <b>Physical positions (bp)</b> | <b>SNPs</b> |
|-------------|----------------|------------------|------------------------------|--------------------------------|-------------|
| 1013        | CakSNP1013     | <i>Kabuli</i>    | <i>Ca_Kabuli_Chr01</i>       | 9757006                        | (G/A)       |
| 1014        | CakSNP1014     | <i>Kabuli</i>    | <i>Ca_Kabuli_Chr01</i>       | 9779398                        | (G/A)       |
| 1015        | CakSNP1015     | <i>Kabuli</i>    | <i>Ca_Kabuli_Chr01</i>       | 9797342                        | (G/T)       |
| 1016        | CakSNP1016     | <i>Kabuli</i>    | <i>Ca_Kabuli_Chr01</i>       | 9810275                        | (T/C)       |
| 1017        | CakSNP1017     | <i>Kabuli</i>    | <i>Ca_Kabuli_Chr01</i>       | 9815448                        | (A/T)       |
| 1018        | CakSNP1018     | <i>Kabuli</i>    | <i>Ca_Kabuli_Chr01</i>       | 9815508                        | (G/C)       |
| 1019        | CakSNP1019     | <i>Kabuli</i>    | <i>Ca_Kabuli_Chr01</i>       | 9836198                        | (A/C)       |
| 1020        | CakSNP1020     | <i>Kabuli</i>    | <i>Ca_Kabuli_Chr01</i>       | 9896511                        | (C/T)       |
| 1021        | CakSNP1021     | <i>Kabuli</i>    | <i>Ca_Kabuli_Chr01</i>       | 9920951                        | (G/A)       |
| 1022        | CakSNP1022     | <i>Kabuli</i>    | <i>Ca_Kabuli_Chr01</i>       | 9920986                        | (A/C)       |
| 1023        | CakSNP1023     | <i>Kabuli</i>    | <i>Ca_Kabuli_Chr01</i>       | 9932690                        | (C/G)       |
| 1024        | CakSNP1024     | <i>Kabuli</i>    | <i>Ca_Kabuli_Chr01</i>       | 10038486                       | (T/G)       |
| 1025        | CakSNP1025     | <i>Kabuli</i>    | <i>Ca_Kabuli_Chr01</i>       | 10049364                       | (A/G)       |
| 1026        | CakSNP1026     | <i>Kabuli</i>    | <i>Ca_Kabuli_Chr01</i>       | 10049469                       | (A/G)       |
| 1027        | CakSNP1027     | <i>Kabuli</i>    | <i>Ca_Kabuli_Chr01</i>       | 10142688                       | (A/G)       |
| 1028        | CakSNP1028     | <i>Kabuli</i>    | <i>Ca_Kabuli_Chr01</i>       | 10155496                       | (T/G)       |
| 1029        | CakSNP1029     | <i>Kabuli</i>    | <i>Ca_Kabuli_Chr01</i>       | 10155584                       | (T/C)       |
| 1030        | CakSNP1030     | <i>Kabuli</i>    | <i>Ca_Kabuli_Chr01</i>       | 10191578                       | (A/C)       |
| 1031        | CakSNP1031     | <i>Kabuli</i>    | <i>Ca_Kabuli_Chr01</i>       | 10201074                       | (C/G)       |
| 1032        | CakSNP1032     | <i>Kabuli</i>    | <i>Ca_Kabuli_Chr01</i>       | 10212925                       | (G/C)       |
| 1033        | CakSNP1033     | <i>Kabuli</i>    | <i>Ca_Kabuli_Chr01</i>       | 10212926                       | (A/C)       |
| 1034        | CakSNP1034     | <i>Kabuli</i>    | <i>Ca_Kabuli_Chr01</i>       | 10212948                       | (T/C)       |
| 1035        | CakSNP1035     | <i>Kabuli</i>    | <i>Ca_Kabuli_Chr01</i>       | 10212976                       | (T/A)       |
| 1036        | CakSNP1036     | <i>Kabuli</i>    | <i>Ca_Kabuli_Chr01</i>       | 10213111                       | (T/C)       |
| 1037        | CakSNP1037     | <i>Kabuli</i>    | <i>Ca_Kabuli_Chr01</i>       | 10266774                       | (C/T)       |
| 1038        | CakSNP1038     | <i>Kabuli</i>    | <i>Ca_Kabuli_Chr01</i>       | 10289781                       | (G/A)       |
| 1039        | CakSNP1039     | <i>Kabuli</i>    | <i>Ca_Kabuli_Chr01</i>       | 10340870                       | (G/C)       |
| 1040        | CakSNP1040     | <i>Kabuli</i>    | <i>Ca_Kabuli_Chr01</i>       | 10364986                       | (C/G)       |
| 1041        | CakSNP1041     | <i>Kabuli</i>    | <i>Ca_Kabuli_Chr01</i>       | 10365024                       | (G/A)       |
| 1042        | CakSNP1042     | <i>Kabuli</i>    | <i>Ca_Kabuli_Chr01</i>       | 10365029                       | (T/A)       |
| 1043        | CakSNP1043     | <i>Kabuli</i>    | <i>Ca_Kabuli_Chr01</i>       | 10366383                       | (G/A)       |
| 1044        | CakSNP1044     | <i>Kabuli</i>    | <i>Ca_Kabuli_Chr01</i>       | 10377700                       | (G/C)       |
| 1045        | CakSNP1045     | <i>Kabuli</i>    | <i>Ca_Kabuli_Chr01</i>       | 10377698                       | (T/C)       |
| 1046        | CakSNP1046     | <i>Kabuli</i>    | <i>Ca_Kabuli_Chr01</i>       | 10377691                       | (T/C)       |
| 1047        | CakSNP1047     | <i>Kabuli</i>    | <i>Ca_Kabuli_Chr01</i>       | 10377860                       | (T/A)       |
| 1048        | CakSNP1048     | <i>Kabuli</i>    | <i>Ca_Kabuli_Chr01</i>       | 10408322                       | (A/G)       |
| 1049        | CakSNP1049     | <i>Kabuli</i>    | <i>Ca_Kabuli_Chr01</i>       | 10408349                       | (G/T)       |
| 1050        | CakSNP1050     | <i>Kabuli</i>    | <i>Ca_Kabuli_Chr01</i>       | 10410479                       | (T/C)       |
| 1051        | CakSNP1051     | <i>Kabuli</i>    | <i>Ca_Kabuli_Chr01</i>       | 10439153                       | (C/G)       |

| <b>S.N.</b> | <b>SNP IDs</b> | <b>Cultivars</b> | <b>Chromosomes/scaffolds</b> | <b>Physical positions (bp)</b> | <b>SNPs</b> |
|-------------|----------------|------------------|------------------------------|--------------------------------|-------------|
| 1052        | CakSNP1052     | <i>Kabuli</i>    | <i>Ca_Kabuli_Chr01</i>       | 10439177                       | (T/C)       |
| 1053        | CakSNP1053     | <i>Kabuli</i>    | <i>Ca_Kabuli_Chr01</i>       | 10439190                       | (C/A)       |
| 1054        | CakSNP1054     | <i>Kabuli</i>    | <i>Ca_Kabuli_Chr01</i>       | 10440393                       | (C/T)       |
| 1055        | CakSNP1055     | <i>Kabuli</i>    | <i>Ca_Kabuli_Chr01</i>       | 10440430                       | (G/T)       |
| 1056        | CakSNP1056     | <i>Kabuli</i>    | <i>Ca_Kabuli_Chr01</i>       | 10440533                       | (C/A)       |
| 1057        | CakSNP1057     | <i>Kabuli</i>    | <i>Ca_Kabuli_Chr01</i>       | 10440479                       | (C/T)       |
| 1058        | CakSNP1058     | <i>Kabuli</i>    | <i>Ca_Kabuli_Chr01</i>       | 10489197                       | (A/G)       |
| 1059        | CakSNP1059     | <i>Kabuli</i>    | <i>Ca_Kabuli_Chr01</i>       | 10527733                       | (A/G)       |
| 1060        | CakSNP1060     | <i>Kabuli</i>    | <i>Ca_Kabuli_Chr01</i>       | 10551440                       | (T/C)       |
| 1061        | CakSNP1061     | <i>Kabuli</i>    | <i>Ca_Kabuli_Chr01</i>       | 10556610                       | (T/G)       |
| 1062        | CakSNP1062     | <i>Kabuli</i>    | <i>Ca_Kabuli_Chr01</i>       | 10560693                       | (A/G)       |
| 1063        | CakSNP1063     | <i>Kabuli</i>    | <i>Ca_Kabuli_Chr01</i>       | 10560690                       | (T/G)       |
| 1064        | CakSNP1064     | <i>Kabuli</i>    | <i>Ca_Kabuli_Chr01</i>       | 10567303                       | (A/C)       |
| 1065        | CakSNP1065     | <i>Kabuli</i>    | <i>Ca_Kabuli_Chr01</i>       | 10571949                       | (G/A)       |
| 1066        | CakSNP1066     | <i>Kabuli</i>    | <i>Ca_Kabuli_Chr01</i>       | 10601318                       | (T/G)       |
| 1067        | CakSNP1067     | <i>Kabuli</i>    | <i>Ca_Kabuli_Chr01</i>       | 10605977                       | (G/A)       |
| 1068        | CakSNP1068     | <i>Kabuli</i>    | <i>Ca_Kabuli_Chr01</i>       | 10623359                       | (T/G)       |
| 1069        | CakSNP1069     | <i>Kabuli</i>    | <i>Ca_Kabuli_Chr01</i>       | 10630658                       | (A/T)       |
| 1070        | CakSNP1070     | <i>Kabuli</i>    | <i>Ca_Kabuli_Chr01</i>       | 10649758                       | (C/T)       |
| 1071        | CakSNP1071     | <i>Kabuli</i>    | <i>Ca_Kabuli_Chr01</i>       | 10655633                       | (G/T)       |
| 1072        | CakSNP1072     | <i>Kabuli</i>    | <i>Ca_Kabuli_Chr01</i>       | 10657464                       | (T/A)       |
| 1073        | CakSNP1073     | <i>Kabuli</i>    | <i>Ca_Kabuli_Chr01</i>       | 10697972                       | (C/G)       |
| 1074        | CakSNP1074     | <i>Kabuli</i>    | <i>Ca_Kabuli_Chr01</i>       | 10710672                       | (T/G)       |
| 1075        | CakSNP1075     | <i>Kabuli</i>    | <i>Ca_Kabuli_Chr01</i>       | 10712235                       | (G/A)       |
| 1076        | CakSNP1076     | <i>Kabuli</i>    | <i>Ca_Kabuli_Chr01</i>       | 10713001                       | (T/A)       |
| 1077        | CakSNP1077     | <i>Kabuli</i>    | <i>Ca_Kabuli_Chr01</i>       | 10734511                       | (G/A)       |
| 1078        | CakSNP1078     | <i>Kabuli</i>    | <i>Ca_Kabuli_Chr01</i>       | 10734570                       | (G/A)       |
| 1079        | CakSNP1079     | <i>Kabuli</i>    | <i>Ca_Kabuli_Chr01</i>       | 10739374                       | (T/A)       |
| 1080        | CakSNP1080     | <i>Kabuli</i>    | <i>Ca_Kabuli_Chr01</i>       | 10761609                       | (G/T)       |
| 1081        | CakSNP1081     | <i>Kabuli</i>    | <i>Ca_Kabuli_Chr01</i>       | 10761648                       | (C/T)       |
| 1082        | CakSNP1082     | <i>Kabuli</i>    | <i>Ca_Kabuli_Chr01</i>       | 10814166                       | (T/C)       |
| 1083        | CakSNP1083     | <i>Kabuli</i>    | <i>Ca_Kabuli_Chr01</i>       | 10837203                       | (C/T)       |
| 1084        | CakSNP1084     | <i>Kabuli</i>    | <i>Ca_Kabuli_Chr01</i>       | 10861334                       | (A/G)       |
| 1085        | CakSNP1085     | <i>Kabuli</i>    | <i>Ca_Kabuli_Chr01</i>       | 10861332                       | (C/G)       |
| 1086        | CakSNP1086     | <i>Kabuli</i>    | <i>Ca_Kabuli_Chr01</i>       | 10861326                       | (T/G)       |
| 1087        | CakSNP1087     | <i>Kabuli</i>    | <i>Ca_Kabuli_Chr01</i>       | 10869338                       | (A/T)       |
| 1088        | CakSNP1088     | <i>Kabuli</i>    | <i>Ca_Kabuli_Chr01</i>       | 10869336                       | (G/A)       |
| 1089        | CakSNP1089     | <i>Kabuli</i>    | <i>Ca_Kabuli_Chr01</i>       | 10887927                       | (C/A)       |
| 1090        | CakSNP1090     | <i>Kabuli</i>    | <i>Ca_Kabuli_Chr01</i>       | 10939428                       | (T/C)       |

| <b>S.N.</b> | <b>SNP IDs</b> | <b>Cultivars</b> | <b>Chromosomes/scaffolds</b> | <b>Physical positions (bp)</b> | <b>SNPs</b> |
|-------------|----------------|------------------|------------------------------|--------------------------------|-------------|
| 1091        | CakSNP1091     | <i>Kabuli</i>    | <i>Ca_Kabuli_Chr01</i>       | 10973356                       | (C/T)       |
| 1092        | CakSNP1092     | <i>Kabuli</i>    | <i>Ca_Kabuli_Chr01</i>       | 11065411                       | (T/A)       |
| 1093        | CakSNP1093     | <i>Kabuli</i>    | <i>Ca_Kabuli_Chr01</i>       | 11103176                       | (T/C)       |
| 1094        | CakSNP1094     | <i>Kabuli</i>    | <i>Ca_Kabuli_Chr01</i>       | 11121162                       | (G/A)       |
| 1095        | CakSNP1095     | <i>Kabuli</i>    | <i>Ca_Kabuli_Chr01</i>       | 11122665                       | (G/T)       |
| 1096        | CakSNP1096     | <i>Kabuli</i>    | <i>Ca_Kabuli_Chr01</i>       | 11191023                       | (G/A)       |
| 1097        | CakSNP1097     | <i>Kabuli</i>    | <i>Ca_Kabuli_Chr01</i>       | 11193334                       | (G/C)       |
| 1098        | CakSNP1098     | <i>Kabuli</i>    | <i>Ca_Kabuli_Chr01</i>       | 11225828                       | (T/C)       |
| 1099        | CakSNP1099     | <i>Kabuli</i>    | <i>Ca_Kabuli_Chr01</i>       | 11227614                       | (T/C)       |
| 1100        | CakSNP1100     | <i>Kabuli</i>    | <i>Ca_Kabuli_Chr01</i>       | 11230086                       | (A/G)       |
| 1101        | CakSNP1101     | <i>Kabuli</i>    | <i>Ca_Kabuli_Chr01</i>       | 11230109                       | (T/C)       |
| 1102        | CakSNP1102     | <i>Kabuli</i>    | <i>Ca_Kabuli_Chr01</i>       | 11230115                       | (G/C)       |
| 1103        | CakSNP1103     | <i>Kabuli</i>    | <i>Ca_Kabuli_Chr01</i>       | 11230116                       | (T/C)       |
| 1104        | CakSNP1104     | <i>Kabuli</i>    | <i>Ca_Kabuli_Chr01</i>       | 11230118                       | (A/T)       |
| 1105        | CakSNP1105     | <i>Kabuli</i>    | <i>Ca_Kabuli_Chr01</i>       | 11230125                       | (A/C)       |
| 1106        | CakSNP1106     | <i>Kabuli</i>    | <i>Ca_Kabuli_Chr01</i>       | 11230126                       | (G/T)       |
| 1107        | CakSNP1107     | <i>Kabuli</i>    | <i>Ca_Kabuli_Chr01</i>       | 11230127                       | (G/T)       |
| 1108        | CakSNP1108     | <i>Kabuli</i>    | <i>Ca_Kabuli_Chr01</i>       | 11230128                       | (T/G)       |
| 1109        | CakSNP1109     | <i>Kabuli</i>    | <i>Ca_Kabuli_Chr01</i>       | 11230133                       | (G/A)       |
| 1110        | CakSNP1110     | <i>Kabuli</i>    | <i>Ca_Kabuli_Chr01</i>       | 11230972                       | (C/T)       |
| 1111        | CakSNP1111     | <i>Kabuli</i>    | <i>Ca_Kabuli_Chr01</i>       | 11230998                       | (A/T)       |
| 1112        | CakSNP1112     | <i>Kabuli</i>    | <i>Ca_Kabuli_Chr01</i>       | 11231052                       | (A/G)       |
| 1113        | CakSNP1113     | <i>Kabuli</i>    | <i>Ca_Kabuli_Chr01</i>       | 11231064                       | (A/G)       |
| 1114        | CakSNP1114     | <i>Kabuli</i>    | <i>Ca_Kabuli_Chr01</i>       | 11231077                       | (T/C)       |
| 1115        | CakSNP1115     | <i>Kabuli</i>    | <i>Ca_Kabuli_Chr01</i>       | 11235211                       | (C/T)       |
| 1116        | CakSNP1116     | <i>Kabuli</i>    | <i>Ca_Kabuli_Chr01</i>       | 11265367                       | (T/C)       |
| 1117        | CakSNP1117     | <i>Kabuli</i>    | <i>Ca_Kabuli_Chr01</i>       | 11277703                       | (T/A)       |
| 1118        | CakSNP1118     | <i>Kabuli</i>    | <i>Ca_Kabuli_Chr01</i>       | 11277964                       | (C/T)       |
| 1119        | CakSNP1119     | <i>Kabuli</i>    | <i>Ca_Kabuli_Chr01</i>       | 11284183                       | (T/C)       |
| 1120        | CakSNP1120     | <i>Kabuli</i>    | <i>Ca_Kabuli_Chr01</i>       | 11285192                       | (G/A)       |
| 1121        | CakSNP1121     | <i>Kabuli</i>    | <i>Ca_Kabuli_Chr01</i>       | 11285247                       | (T/C)       |
| 1122        | CakSNP1122     | <i>Kabuli</i>    | <i>Ca_Kabuli_Chr01</i>       | 11285291                       | (C/A)       |
| 1123        | CakSNP1123     | <i>Kabuli</i>    | <i>Ca_Kabuli_Chr01</i>       | 11291516                       | (G/A)       |
| 1124        | CakSNP1124     | <i>Kabuli</i>    | <i>Ca_Kabuli_Chr01</i>       | 11291741                       | (A/C)       |
| 1125        | CakSNP1125     | <i>Kabuli</i>    | <i>Ca_Kabuli_Chr01</i>       | 11291740                       | (T/A)       |
| 1126        | CakSNP1126     | <i>Kabuli</i>    | <i>Ca_Kabuli_Chr01</i>       | 11291737                       | (C/A)       |
| 1127        | CakSNP1127     | <i>Kabuli</i>    | <i>Ca_Kabuli_Chr01</i>       | 11319264                       | (A/C)       |
| 1128        | CakSNP1128     | <i>Kabuli</i>    | <i>Ca_Kabuli_Chr01</i>       | 11321670                       | (G/C)       |
| 1129        | CakSNP1129     | <i>Kabuli</i>    | <i>Ca_Kabuli_Chr01</i>       | 11324018                       | (C/A)       |

| <b>S.N.</b> | <b>SNP IDs</b> | <b>Cultivars</b> | <b>Chromosomes/scaffolds</b> | <b>Physical positions (bp)</b> | <b>SNPs</b> |
|-------------|----------------|------------------|------------------------------|--------------------------------|-------------|
| 1130        | CakSNP1130     | <i>Kabuli</i>    | <i>Ca_Kabuli_Chr01</i>       | 11324023                       | (C/T)       |
| 1131        | CakSNP1131     | <i>Kabuli</i>    | <i>Ca_Kabuli_Chr01</i>       | 11324035                       | (C/T)       |
| 1132        | CakSNP1132     | <i>Kabuli</i>    | <i>Ca_Kabuli_Chr01</i>       | 11324050                       | (G/T)       |
| 1133        | CakSNP1133     | <i>Kabuli</i>    | <i>Ca_Kabuli_Chr01</i>       | 11342388                       | (T/C)       |
| 1134        | CakSNP1134     | <i>Kabuli</i>    | <i>Ca_Kabuli_Chr01</i>       | 11361646                       | (G/A)       |
| 1135        | CakSNP1135     | <i>Kabuli</i>    | <i>Ca_Kabuli_Chr01</i>       | 11361588                       | (T/G)       |
| 1136        | CakSNP1136     | <i>Kabuli</i>    | <i>Ca_Kabuli_Chr01</i>       | 11361583                       | (T/C)       |
| 1137        | CakSNP1137     | <i>Kabuli</i>    | <i>Ca_Kabuli_Chr01</i>       | 11374707                       | (G/A)       |
| 1138        | CakSNP1138     | <i>Kabuli</i>    | <i>Ca_Kabuli_Chr01</i>       | 11405015                       | (A/G)       |
| 1139        | CakSNP1139     | <i>Kabuli</i>    | <i>Ca_Kabuli_Chr01</i>       | 11405118                       | (G/A)       |
| 1140        | CakSNP1140     | <i>Kabuli</i>    | <i>Ca_Kabuli_Chr01</i>       | 11423677                       | (C/A)       |
| 1141        | CakSNP1141     | <i>Kabuli</i>    | <i>Ca_Kabuli_Chr01</i>       | 11487689                       | (A/G)       |
| 1142        | CakSNP1142     | <i>Kabuli</i>    | <i>Ca_Kabuli_Chr01</i>       | 11487630                       | (C/A)       |
| 1143        | CakSNP1143     | <i>Kabuli</i>    | <i>Ca_Kabuli_Chr01</i>       | 11487752                       | (G/T)       |
| 1144        | CakSNP1144     | <i>Kabuli</i>    | <i>Ca_Kabuli_Chr01</i>       | 11502148                       | (C/A)       |
| 1145        | CakSNP1145     | <i>Kabuli</i>    | <i>Ca_Kabuli_Chr01</i>       | 11514888                       | (T/A)       |
| 1146        | CakSNP1146     | <i>Kabuli</i>    | <i>Ca_Kabuli_Chr01</i>       | 11514898                       | (T/C)       |
| 1147        | CakSNP1147     | <i>Kabuli</i>    | <i>Ca_Kabuli_Chr01</i>       | 11514903                       | (A/G)       |
| 1148        | CakSNP1148     | <i>Kabuli</i>    | <i>Ca_Kabuli_Chr01</i>       | 11515055                       | (G/A)       |
| 1149        | CakSNP1149     | <i>Kabuli</i>    | <i>Ca_Kabuli_Chr01</i>       | 11515130                       | (T/G)       |
| 1150        | CakSNP1150     | <i>Kabuli</i>    | <i>Ca_Kabuli_Chr01</i>       | 11522656                       | (G/T)       |
| 1151        | CakSNP1151     | <i>Kabuli</i>    | <i>Ca_Kabuli_Chr01</i>       | 11522743                       | (T/C)       |
| 1152        | CakSNP1152     | <i>Kabuli</i>    | <i>Ca_Kabuli_Chr01</i>       | 11522875                       | (C/T)       |
| 1153        | CakSNP1153     | <i>Kabuli</i>    | <i>Ca_Kabuli_Chr01</i>       | 11601347                       | (T/C)       |
| 1154        | CakSNP1154     | <i>Kabuli</i>    | <i>Ca_Kabuli_Chr01</i>       | 11624419                       | (C/G)       |
| 1155        | CakSNP1155     | <i>Kabuli</i>    | <i>Ca_Kabuli_Chr01</i>       | 11624464                       | (C/T)       |
| 1156        | CakSNP1156     | <i>Kabuli</i>    | <i>Ca_Kabuli_Chr01</i>       | 11669794                       | (T/G)       |
| 1157        | CakSNP1157     | <i>Kabuli</i>    | <i>Ca_Kabuli_Chr01</i>       | 11673478                       | (A/C)       |
| 1158        | CakSNP1158     | <i>Kabuli</i>    | <i>Ca_Kabuli_Chr01</i>       | 11677097                       | (C/A)       |
| 1159        | CakSNP1159     | <i>Kabuli</i>    | <i>Ca_Kabuli_Chr01</i>       | 11685769                       | (A/G)       |
| 1160        | CakSNP1160     | <i>Kabuli</i>    | <i>Ca_Kabuli_Chr01</i>       | 11685790                       | (T/C)       |
| 1161        | CakSNP1161     | <i>Kabuli</i>    | <i>Ca_Kabuli_Chr01</i>       | 11706451                       | (C/T)       |
| 1162        | CakSNP1162     | <i>Kabuli</i>    | <i>Ca_Kabuli_Chr01</i>       | 11706494                       | (G/C)       |
| 1163        | CakSNP1163     | <i>Kabuli</i>    | <i>Ca_Kabuli_Chr01</i>       | 11706583                       | (A/C)       |
| 1164        | CakSNP1164     | <i>Kabuli</i>    | <i>Ca_Kabuli_Chr01</i>       | 11706545                       | (C/G)       |
| 1165        | CakSNP1165     | <i>Kabuli</i>    | <i>Ca_Kabuli_Chr01</i>       | 11741448                       | (T/A)       |
| 1166        | CakSNP1166     | <i>Kabuli</i>    | <i>Ca_Kabuli_Chr01</i>       | 11793443                       | (C/A)       |
| 1167        | CakSNP1167     | <i>Kabuli</i>    | <i>Ca_Kabuli_Chr01</i>       | 11822248                       | (A/T)       |
| 1168        | CakSNP1168     | <i>Kabuli</i>    | <i>Ca_Kabuli_Chr01</i>       | 11822305                       | (G/T)       |

| <b>S.N.</b> | <b>SNP IDs</b> | <b>Cultivars</b> | <b>Chromosomes/scaffolds</b> | <b>Physical positions (bp)</b> | <b>SNPs</b> |
|-------------|----------------|------------------|------------------------------|--------------------------------|-------------|
| 1169        | CakSNP1169     | <i>Kabuli</i>    | <i>Ca_Kabuli_Chr01</i>       | 11822309                       | (C/A)       |
| 1170        | CakSNP1170     | <i>Kabuli</i>    | <i>Ca_Kabuli_Chr01</i>       | 11870401                       | (A/G)       |
| 1171        | CakSNP1171     | <i>Kabuli</i>    | <i>Ca_Kabuli_Chr01</i>       | 11935333                       | (A/T)       |
| 1172        | CakSNP1172     | <i>Kabuli</i>    | <i>Ca_Kabuli_Chr01</i>       | 11955896                       | (G/T)       |
| 1173        | CakSNP1173     | <i>Kabuli</i>    | <i>Ca_Kabuli_Chr01</i>       | 11955866                       | (G/A)       |
| 1174        | CakSNP1174     | <i>Kabuli</i>    | <i>Ca_Kabuli_Chr01</i>       | 11955853                       | (A/T)       |
| 1175        | CakSNP1175     | <i>Kabuli</i>    | <i>Ca_Kabuli_Chr01</i>       | 12054809                       | (C/T)       |
| 1176        | CakSNP1176     | <i>Kabuli</i>    | <i>Ca_Kabuli_Chr01</i>       | 12189822                       | (T/G)       |
| 1177        | CakSNP1177     | <i>Kabuli</i>    | <i>Ca_Kabuli_Chr01</i>       | 12189825                       | (T/G)       |
| 1178        | CakSNP1178     | <i>Kabuli</i>    | <i>Ca_Kabuli_Chr01</i>       | 12193933                       | (T/G)       |
| 1179        | CakSNP1179     | <i>Kabuli</i>    | <i>Ca_Kabuli_Chr01</i>       | 12199691                       | (C/G)       |
| 1180        | CakSNP1180     | <i>Kabuli</i>    | <i>Ca_Kabuli_Chr01</i>       | 12236387                       | (T/A)       |
| 1181        | CakSNP1181     | <i>Kabuli</i>    | <i>Ca_Kabuli_Chr01</i>       | 12264697                       | (T/G)       |
| 1182        | CakSNP1182     | <i>Kabuli</i>    | <i>Ca_Kabuli_Chr01</i>       | 12326230                       | (A/G)       |
| 1183        | CakSNP1183     | <i>Kabuli</i>    | <i>Ca_Kabuli_Chr01</i>       | 12326234                       | (T/A)       |
| 1184        | CakSNP1184     | <i>Kabuli</i>    | <i>Ca_Kabuli_Chr01</i>       | 12326318                       | (C/G)       |
| 1185        | CakSNP1185     | <i>Kabuli</i>    | <i>Ca_Kabuli_Chr01</i>       | 12334259                       | (C/T)       |
| 1186        | CakSNP1186     | <i>Kabuli</i>    | <i>Ca_Kabuli_Chr01</i>       | 12340884                       | (C/T)       |
| 1187        | CakSNP1187     | <i>Kabuli</i>    | <i>Ca_Kabuli_Chr01</i>       | 12390756                       | (G/T)       |
| 1188        | CakSNP1188     | <i>Kabuli</i>    | <i>Ca_Kabuli_Chr01</i>       | 12390750                       | (T/C)       |
| 1189        | CakSNP1189     | <i>Kabuli</i>    | <i>Ca_Kabuli_Chr01</i>       | 12391116                       | (G/C)       |
| 1190        | CakSNP1190     | <i>Kabuli</i>    | <i>Ca_Kabuli_Chr01</i>       | 12391074                       | (G/A)       |
| 1191        | CakSNP1191     | <i>Kabuli</i>    | <i>Ca_Kabuli_Chr01</i>       | 12391067                       | (C/A)       |
| 1192        | CakSNP1192     | <i>Kabuli</i>    | <i>Ca_Kabuli_Chr01</i>       | 12413012                       | (G/T)       |
| 1193        | CakSNP1193     | <i>Kabuli</i>    | <i>Ca_Kabuli_Chr01</i>       | 12413016                       | (T/A)       |
| 1194        | CakSNP1194     | <i>Kabuli</i>    | <i>Ca_Kabuli_Chr01</i>       | 12413025                       | (G/C)       |
| 1195        | CakSNP1195     | <i>Kabuli</i>    | <i>Ca_Kabuli_Chr01</i>       | 12413116                       | (G/A)       |
| 1196        | CakSNP1196     | <i>Kabuli</i>    | <i>Ca_Kabuli_Chr01</i>       | 12414040                       | (G/A)       |
| 1197        | CakSNP1197     | <i>Kabuli</i>    | <i>Ca_Kabuli_Chr01</i>       | 12481879                       | (C/A)       |
| 1198        | CakSNP1198     | <i>Kabuli</i>    | <i>Ca_Kabuli_Chr01</i>       | 12525445                       | (A/G)       |
| 1199        | CakSNP1199     | <i>Kabuli</i>    | <i>Ca_Kabuli_Chr01</i>       | 12525640                       | (G/C)       |
| 1200        | CakSNP1200     | <i>Kabuli</i>    | <i>Ca_Kabuli_Chr01</i>       | 12566565                       | (C/T)       |
| 1201        | CakSNP1201     | <i>Kabuli</i>    | <i>Ca_Kabuli_Chr01</i>       | 12566579                       | (C/T)       |
| 1202        | CakSNP1202     | <i>Kabuli</i>    | <i>Ca_Kabuli_Chr01</i>       | 12566607                       | (T/C)       |
| 1203        | CakSNP1203     | <i>Kabuli</i>    | <i>Ca_Kabuli_Chr01</i>       | 12566615                       | (C/T)       |
| 1204        | CakSNP1204     | <i>Kabuli</i>    | <i>Ca_Kabuli_Chr01</i>       | 12566641                       | (T/C)       |
| 1205        | CakSNP1205     | <i>Kabuli</i>    | <i>Ca_Kabuli_Chr01</i>       | 12588525                       | (A/G)       |
| 1206        | CakSNP1206     | <i>Kabuli</i>    | <i>Ca_Kabuli_Chr01</i>       | 12597939                       | (A/T)       |
| 1207        | CakSNP1207     | <i>Kabuli</i>    | <i>Ca_Kabuli_Chr01</i>       | 12639552                       | (T/A)       |



| <b>S.N.</b> | <b>SNP IDs</b> | <b>Cultivars</b> | <b>Chromosomes/scaffolds</b> | <b>Physical positions (bp)</b> | <b>SNPs</b> |
|-------------|----------------|------------------|------------------------------|--------------------------------|-------------|
| 1208        | CakSNP1208     | <i>Kabuli</i>    | <i>Ca_Kabuli_Chr01</i>       | 12639584                       | (T/C)       |
| 1209        | CakSNP1209     | <i>Kabuli</i>    | <i>Ca_Kabuli_Chr01</i>       | 12687506                       | (C/T)       |
| 1210        | CakSNP1210     | <i>Kabuli</i>    | <i>Ca_Kabuli_Chr01</i>       | 12688424                       | (A/G)       |
| 1211        | CakSNP1211     | <i>Kabuli</i>    | <i>Ca_Kabuli_Chr01</i>       | 12688435                       | (A/C)       |
| 1212        | CakSNP1212     | <i>Kabuli</i>    | <i>Ca_Kabuli_Chr01</i>       | 12704406                       | (G/T)       |
| 1213        | CakSNP1213     | <i>Kabuli</i>    | <i>Ca_Kabuli_Chr01</i>       | 12705665                       | (C/T)       |
| 1214        | CakSNP1214     | <i>Kabuli</i>    | <i>Ca_Kabuli_Chr01</i>       | 12705731                       | (G/A)       |
| 1215        | CakSNP1215     | <i>Kabuli</i>    | <i>Ca_Kabuli_Chr01</i>       | 12715427                       | (C/T)       |
| 1216        | CakSNP1216     | <i>Kabuli</i>    | <i>Ca_Kabuli_Chr01</i>       | 12719734                       | (T/A)       |
| 1217        | CakSNP1217     | <i>Kabuli</i>    | <i>Ca_Kabuli_Chr01</i>       | 12719735                       | (G/T)       |
| 1218        | CakSNP1218     | <i>Kabuli</i>    | <i>Ca_Kabuli_Chr01</i>       | 12719752                       | (G/C)       |
| 1219        | CakSNP1219     | <i>Kabuli</i>    | <i>Ca_Kabuli_Chr01</i>       | 12736298                       | (A/G)       |
| 1220        | CakSNP1220     | <i>Kabuli</i>    | <i>Ca_Kabuli_Chr01</i>       | 12736353                       | (A/C)       |
| 1221        | CakSNP1221     | <i>Kabuli</i>    | <i>Ca_Kabuli_Chr01</i>       | 12736622                       | (T/G)       |
| 1222        | CakSNP1222     | <i>Kabuli</i>    | <i>Ca_Kabuli_Chr01</i>       | 12738564                       | (C/T)       |
| 1223        | CakSNP1223     | <i>Kabuli</i>    | <i>Ca_Kabuli_Chr01</i>       | 12754422                       | (G/T)       |
| 1224        | CakSNP1224     | <i>Kabuli</i>    | <i>Ca_Kabuli_Chr01</i>       | 12794075                       | (C/A)       |
| 1225        | CakSNP1225     | <i>Kabuli</i>    | <i>Ca_Kabuli_Chr01</i>       | 12794147                       | (G/T)       |
| 1226        | CakSNP1226     | <i>Kabuli</i>    | <i>Ca_Kabuli_Chr01</i>       | 12794251                       | (A/C)       |
| 1227        | CakSNP1227     | <i>Kabuli</i>    | <i>Ca_Kabuli_Chr01</i>       | 12800638                       | (T/C)       |
| 1228        | CakSNP1228     | <i>Kabuli</i>    | <i>Ca_Kabuli_Chr01</i>       | 12800610                       | (A/C)       |
| 1229        | CakSNP1229     | <i>Kabuli</i>    | <i>Ca_Kabuli_Chr01</i>       | 12800607                       | (T/A)       |
| 1230        | CakSNP1230     | <i>Kabuli</i>    | <i>Ca_Kabuli_Chr01</i>       | 12800601                       | (T/A)       |
| 1231        | CakSNP1231     | <i>Kabuli</i>    | <i>Ca_Kabuli_Chr01</i>       | 12800597                       | (G/T)       |
| 1232        | CakSNP1232     | <i>Kabuli</i>    | <i>Ca_Kabuli_Chr01</i>       | 12831717                       | (G/T)       |
| 1233        | CakSNP1233     | <i>Kabuli</i>    | <i>Ca_Kabuli_Chr01</i>       | 12845445                       | (A/C)       |
| 1234        | CakSNP1234     | <i>Kabuli</i>    | <i>Ca_Kabuli_Chr01</i>       | 12875506                       | (G/A)       |
| 1235        | CakSNP1235     | <i>Kabuli</i>    | <i>Ca_Kabuli_Chr01</i>       | 12880408                       | (G/A)       |
| 1236        | CakSNP1236     | <i>Kabuli</i>    | <i>Ca_Kabuli_Chr01</i>       | 12912621                       | (C/T)       |
| 1237        | CakSNP1237     | <i>Kabuli</i>    | <i>Ca_Kabuli_Chr01</i>       | 12912625                       | (T/C)       |
| 1238        | CakSNP1238     | <i>Kabuli</i>    | <i>Ca_Kabuli_Chr01</i>       | 12912670                       | (C/T)       |
| 1239        | CakSNP1239     | <i>Kabuli</i>    | <i>Ca_Kabuli_Chr01</i>       | 12947377                       | (C/T)       |
| 1240        | CakSNP1240     | <i>Kabuli</i>    | <i>Ca_Kabuli_Chr01</i>       | 12947376                       | (C/T)       |
| 1241        | CakSNP1241     | <i>Kabuli</i>    | <i>Ca_Kabuli_Chr01</i>       | 12947358                       | (A/T)       |
| 1242        | CakSNP1242     | <i>Kabuli</i>    | <i>Ca_Kabuli_Chr01</i>       | 12947347                       | (A/G)       |
| 1243        | CakSNP1243     | <i>Kabuli</i>    | <i>Ca_Kabuli_Chr01</i>       | 12992445                       | (A/C)       |
| 1244        | CakSNP1244     | <i>Kabuli</i>    | <i>Ca_Kabuli_Chr01</i>       | 12992423                       | (A/C)       |
| 1245        | CakSNP1245     | <i>Kabuli</i>    | <i>Ca_Kabuli_Chr01</i>       | 12992569                       | (A/G)       |
| 1246        | CakSNP1246     | <i>Kabuli</i>    | <i>Ca_Kabuli_Chr01</i>       | 13028543                       | (T/C)       |

| <b>S.N.</b> | <b>SNP IDs</b> | <b>Cultivars</b> | <b>Chromosomes/scaffolds</b> | <b>Physical positions (bp)</b> | <b>SNPs</b> |
|-------------|----------------|------------------|------------------------------|--------------------------------|-------------|
| 1247        | CakSNP1247     | <i>Kabuli</i>    | <i>Ca_Kabuli_Chr01</i>       | 13028517                       | (G/A)       |
| 1248        | CakSNP1248     | <i>Kabuli</i>    | <i>Ca_Kabuli_Chr01</i>       | 13028505                       | (A/G)       |
| 1249        | CakSNP1249     | <i>Kabuli</i>    | <i>Ca_Kabuli_Chr01</i>       | 13034708                       | (T/G)       |
| 1250        | CakSNP1250     | <i>Kabuli</i>    | <i>Ca_Kabuli_Chr01</i>       | 13034810                       | (G/A)       |
| 1251        | CakSNP1251     | <i>Kabuli</i>    | <i>Ca_Kabuli_Chr01</i>       | 13040664                       | (T/C)       |
| 1252        | CakSNP1252     | <i>Kabuli</i>    | <i>Ca_Kabuli_Chr01</i>       | 13066954                       | (C/T)       |
| 1253        | CakSNP1253     | <i>Kabuli</i>    | <i>Ca_Kabuli_Chr01</i>       | 13066968                       | (C/G)       |
| 1254        | CakSNP1254     | <i>Kabuli</i>    | <i>Ca_Kabuli_Chr01</i>       | 13076647                       | (T/A)       |
| 1255        | CakSNP1255     | <i>Kabuli</i>    | <i>Ca_Kabuli_Chr01</i>       | 13076695                       | (G/A)       |
| 1256        | CakSNP1256     | <i>Kabuli</i>    | <i>Ca_Kabuli_Chr01</i>       | 13156473                       | (A/C)       |
| 1257        | CakSNP1257     | <i>Kabuli</i>    | <i>Ca_Kabuli_Chr01</i>       | 13158244                       | (C/T)       |
| 1258        | CakSNP1258     | <i>Kabuli</i>    | <i>Ca_Kabuli_Chr01</i>       | 13158201                       | (C/T)       |
| 1259        | CakSNP1259     | <i>Kabuli</i>    | <i>Ca_Kabuli_Chr01</i>       | 13158192                       | (T/C)       |
| 1260        | CakSNP1260     | <i>Kabuli</i>    | <i>Ca_Kabuli_Chr01</i>       | 13199761                       | (T/A)       |
| 1261        | CakSNP1261     | <i>Kabuli</i>    | <i>Ca_Kabuli_Chr01</i>       | 13202986                       | (T/G)       |
| 1262        | CakSNP1262     | <i>Kabuli</i>    | <i>Ca_Kabuli_Chr01</i>       | 13202991                       | (T/G)       |
| 1263        | CakSNP1263     | <i>Kabuli</i>    | <i>Ca_Kabuli_Chr01</i>       | 13216776                       | (G/T)       |
| 1264        | CakSNP1264     | <i>Kabuli</i>    | <i>Ca_Kabuli_Chr01</i>       | 13216741                       | (T/A)       |
| 1265        | CakSNP1265     | <i>Kabuli</i>    | <i>Ca_Kabuli_Chr01</i>       | 13216710                       | (G/A)       |
| 1266        | CakSNP1266     | <i>Kabuli</i>    | <i>Ca_Kabuli_Chr01</i>       | 13267896                       | (T/C)       |
| 1267        | CakSNP1267     | <i>Kabuli</i>    | <i>Ca_Kabuli_Chr01</i>       | 13282556                       | (A/G)       |
| 1268        | CakSNP1268     | <i>Kabuli</i>    | <i>Ca_Kabuli_Chr01</i>       | 13282552                       | (T/C)       |
| 1269        | CakSNP1269     | <i>Kabuli</i>    | <i>Ca_Kabuli_Chr01</i>       | 13316992                       | (C/A)       |
| 1270        | CakSNP1270     | <i>Kabuli</i>    | <i>Ca_Kabuli_Chr01</i>       | 13331955                       | (T/A)       |
| 1271        | CakSNP1271     | <i>Kabuli</i>    | <i>Ca_Kabuli_Chr01</i>       | 13331941                       | (C/T)       |
| 1272        | CakSNP1272     | <i>Kabuli</i>    | <i>Ca_Kabuli_Chr01</i>       | 13332015                       | (C/A)       |
| 1273        | CakSNP1273     | <i>Kabuli</i>    | <i>Ca_Kabuli_Chr01</i>       | 13332025                       | (T/G)       |
| 1274        | CakSNP1274     | <i>Kabuli</i>    | <i>Ca_Kabuli_Chr01</i>       | 13365594                       | (T/A)       |
| 1275        | CakSNP1275     | <i>Kabuli</i>    | <i>Ca_Kabuli_Chr01</i>       | 13365625                       | (C/G)       |
| 1276        | CakSNP1276     | <i>Kabuli</i>    | <i>Ca_Kabuli_Chr01</i>       | 13368341                       | (G/A)       |
| 1277        | CakSNP1277     | <i>Kabuli</i>    | <i>Ca_Kabuli_Chr01</i>       | 13368556                       | (T/A)       |
| 1278        | CakSNP1278     | <i>Kabuli</i>    | <i>Ca_Kabuli_Chr01</i>       | 13369730                       | (G/A)       |
| 1279        | CakSNP1279     | <i>Kabuli</i>    | <i>Ca_Kabuli_Chr01</i>       | 13369986                       | (C/A)       |
| 1280        | CakSNP1280     | <i>Kabuli</i>    | <i>Ca_Kabuli_Chr01</i>       | 13497572                       | (G/T)       |
| 1281        | CakSNP1281     | <i>Kabuli</i>    | <i>Ca_Kabuli_Chr01</i>       | 13549635                       | (T/C)       |
| 1282        | CakSNP1282     | <i>Kabuli</i>    | <i>Ca_Kabuli_Chr01</i>       | 13550600                       | (G/A)       |
| 1283        | CakSNP1283     | <i>Kabuli</i>    | <i>Ca_Kabuli_Chr01</i>       | 13560364                       | (T/G)       |
| 1284        | CakSNP1284     | <i>Kabuli</i>    | <i>Ca_Kabuli_Chr01</i>       | 13590903                       | (G/T)       |
| 1285        | CakSNP1285     | <i>Kabuli</i>    | <i>Ca_Kabuli_Chr01</i>       | 13591177                       | (G/A)       |

| <b>S.N.</b> | <b>SNP IDs</b> | <b>Cultivars</b> | <b>Chromosomes/scaffolds</b> | <b>Physical positions (bp)</b> | <b>SNPs</b> |
|-------------|----------------|------------------|------------------------------|--------------------------------|-------------|
| 1286        | CakSNP1286     | <i>Kabuli</i>    | <i>Ca_Kabuli_Chr01</i>       | 13591203                       | (C/G)       |
| 1287        | CakSNP1287     | <i>Kabuli</i>    | <i>Ca_Kabuli_Chr01</i>       | 13591314                       | (C/T)       |
| 1288        | CakSNP1288     | <i>Kabuli</i>    | <i>Ca_Kabuli_Chr01</i>       | 13593931                       | (T/A)       |
| 1289        | CakSNP1289     | <i>Kabuli</i>    | <i>Ca_Kabuli_Chr01</i>       | 13596411                       | (G/T)       |
| 1290        | CakSNP1290     | <i>Kabuli</i>    | <i>Ca_Kabuli_Chr01</i>       | 13596528                       | (T/A)       |
| 1291        | CakSNP1291     | <i>Kabuli</i>    | <i>Ca_Kabuli_Chr01</i>       | 13596539                       | (A/G)       |
| 1292        | CakSNP1292     | <i>Kabuli</i>    | <i>Ca_Kabuli_Chr01</i>       | 13596666                       | (T/A)       |
| 1293        | CakSNP1293     | <i>Kabuli</i>    | <i>Ca_Kabuli_Chr01</i>       | 13596659                       | (T/A)       |
| 1294        | CakSNP1294     | <i>Kabuli</i>    | <i>Ca_Kabuli_Chr01</i>       | 13596631                       | (C/T)       |
| 1295        | CakSNP1295     | <i>Kabuli</i>    | <i>Ca_Kabuli_Chr01</i>       | 13596621                       | (C/T)       |
| 1296        | CakSNP1296     | <i>Kabuli</i>    | <i>Ca_Kabuli_Chr01</i>       | 13596741                       | (C/T)       |
| 1297        | CakSNP1297     | <i>Kabuli</i>    | <i>Ca_Kabuli_Chr01</i>       | 13596771                       | (C/A)       |
| 1298        | CakSNP1298     | <i>Kabuli</i>    | <i>Ca_Kabuli_Chr01</i>       | 13607486                       | (A/C)       |
| 1299        | CakSNP1299     | <i>Kabuli</i>    | <i>Ca_Kabuli_Chr01</i>       | 13608414                       | (T/C)       |
| 1300        | CakSNP1300     | <i>Kabuli</i>    | <i>Ca_Kabuli_Chr01</i>       | 13637705                       | (G/T)       |
| 1301        | CakSNP1301     | <i>Kabuli</i>    | <i>Ca_Kabuli_Chr01</i>       | 13637688                       | (A/G)       |
| 1302        | CakSNP1302     | <i>Kabuli</i>    | <i>Ca_Kabuli_Chr01</i>       | 13637687                       | (C/T)       |
| 1303        | CakSNP1303     | <i>Kabuli</i>    | <i>Ca_Kabuli_Chr01</i>       | 13637684                       | (C/T)       |
| 1304        | CakSNP1304     | <i>Kabuli</i>    | <i>Ca_Kabuli_Chr01</i>       | 13639157                       | (T/C)       |
| 1305        | CakSNP1305     | <i>Kabuli</i>    | <i>Ca_Kabuli_Chr01</i>       | 13641517                       | (A/G)       |
| 1306        | CakSNP1306     | <i>Kabuli</i>    | <i>Ca_Kabuli_Chr01</i>       | 13641644                       | (G/A)       |
| 1307        | CakSNP1307     | <i>Kabuli</i>    | <i>Ca_Kabuli_Chr01</i>       | 13641615                       | (A/G)       |
| 1308        | CakSNP1308     | <i>Kabuli</i>    | <i>Ca_Kabuli_Chr01</i>       | 13641608                       | (G/T)       |
| 1309        | CakSNP1309     | <i>Kabuli</i>    | <i>Ca_Kabuli_Chr01</i>       | 13641574                       | (A/C)       |
| 1310        | CakSNP1310     | <i>Kabuli</i>    | <i>Ca_Kabuli_Chr01</i>       | 13641564                       | (G/A)       |
| 1311        | CakSNP1311     | <i>Kabuli</i>    | <i>Ca_Kabuli_Chr01</i>       | 13668759                       | (T/A)       |
| 1312        | CakSNP1312     | <i>Kabuli</i>    | <i>Ca_Kabuli_Chr01</i>       | 13680002                       | (G/T)       |
| 1313        | CakSNP1313     | <i>Kabuli</i>    | <i>Ca_Kabuli_Chr01</i>       | 13680008                       | (G/C)       |
| 1314        | CakSNP1314     | <i>Kabuli</i>    | <i>Ca_Kabuli_Chr01</i>       | 13762410                       | (C/A)       |
| 1315        | CakSNP1315     | <i>Kabuli</i>    | <i>Ca_Kabuli_Chr01</i>       | 13769805                       | (C/T)       |
| 1316        | CakSNP1316     | <i>Kabuli</i>    | <i>Ca_Kabuli_Chr01</i>       | 13769771                       | (T/C)       |
| 1317        | CakSNP1317     | <i>Kabuli</i>    | <i>Ca_Kabuli_Chr01</i>       | 13782049                       | (C/T)       |
| 1318        | CakSNP1318     | <i>Kabuli</i>    | <i>Ca_Kabuli_Chr01</i>       | 13814790                       | (T/C)       |
| 1319        | CakSNP1319     | <i>Kabuli</i>    | <i>Ca_Kabuli_Chr01</i>       | 13828703                       | (C/T)       |
| 1320        | CakSNP1320     | <i>Kabuli</i>    | <i>Ca_Kabuli_Chr01</i>       | 13828659                       | (G/A)       |
| 1321        | CakSNP1321     | <i>Kabuli</i>    | <i>Ca_Kabuli_Chr01</i>       | 13828657                       | (G/A)       |
| 1322        | CakSNP1322     | <i>Kabuli</i>    | <i>Ca_Kabuli_Chr01</i>       | 13828744                       | (A/T)       |
| 1323        | CakSNP1323     | <i>Kabuli</i>    | <i>Ca_Kabuli_Chr01</i>       | 13991356                       | (T/G)       |
| 1324        | CakSNP1324     | <i>Kabuli</i>    | <i>Ca_Kabuli_Chr01</i>       | 14014566                       | (C/A)       |

| <b>S.N.</b> | <b>SNP IDs</b> | <b>Cultivars</b> | <b>Chromosomes/scaffolds</b> | <b>Physical positions (bp)</b> | <b>SNPs</b> |
|-------------|----------------|------------------|------------------------------|--------------------------------|-------------|
| 1325        | CakSNP1325     | <i>Kabuli</i>    | <i>Ca_Kabuli_Chr01</i>       | 14015757                       | (T/C)       |
| 1326        | CakSNP1326     | <i>Kabuli</i>    | <i>Ca_Kabuli_Chr01</i>       | 14015781                       | (G/C)       |
| 1327        | CakSNP1327     | <i>Kabuli</i>    | <i>Ca_Kabuli_Chr01</i>       | 14015818                       | (C/T)       |
| 1328        | CakSNP1328     | <i>Kabuli</i>    | <i>Ca_Kabuli_Chr01</i>       | 14022892                       | (C/A)       |
| 1329        | CakSNP1329     | <i>Kabuli</i>    | <i>Ca_Kabuli_Chr01</i>       | 14022890                       | (A/T)       |
| 1330        | CakSNP1330     | <i>Kabuli</i>    | <i>Ca_Kabuli_Chr01</i>       | 14023097                       | (A/C)       |
| 1331        | CakSNP1331     | <i>Kabuli</i>    | <i>Ca_Kabuli_Chr01</i>       | 14023095                       | (T/A)       |
| 1332        | CakSNP1332     | <i>Kabuli</i>    | <i>Ca_Kabuli_Chr01</i>       | 14023078                       | (T/A)       |
| 1333        | CakSNP1333     | <i>Kabuli</i>    | <i>Ca_Kabuli_Chr01</i>       | 14025015                       | (G/A)       |
| 1334        | CakSNP1334     | <i>Kabuli</i>    | <i>Ca_Kabuli_Chr01</i>       | 14025075                       | (A/G)       |
| 1335        | CakSNP1335     | <i>Kabuli</i>    | <i>Ca_Kabuli_Chr01</i>       | 14026347                       | (C/G)       |
| 1336        | CakSNP1336     | <i>Kabuli</i>    | <i>Ca_Kabuli_Chr01</i>       | 14026391                       | (T/C)       |
| 1337        | CakSNP1337     | <i>Kabuli</i>    | <i>Ca_Kabuli_Chr01</i>       | 14026467                       | (C/T)       |
| 1338        | CakSNP1338     | <i>Kabuli</i>    | <i>Ca_Kabuli_Chr01</i>       | 14026444                       | (G/T)       |
| 1339        | CakSNP1339     | <i>Kabuli</i>    | <i>Ca_Kabuli_Chr01</i>       | 14026437                       | (C/A)       |
| 1340        | CakSNP1340     | <i>Kabuli</i>    | <i>Ca_Kabuli_Chr01</i>       | 14033226                       | (C/T)       |
| 1341        | CakSNP1341     | <i>Kabuli</i>    | <i>Ca_Kabuli_Chr01</i>       | 14033285                       | (C/T)       |
| 1342        | CakSNP1342     | <i>Kabuli</i>    | <i>Ca_Kabuli_Chr01</i>       | 14033277                       | (G/C)       |
| 1343        | CakSNP1343     | <i>Kabuli</i>    | <i>Ca_Kabuli_Chr01</i>       | 14033951                       | (G/A)       |
| 1344        | CakSNP1344     | <i>Kabuli</i>    | <i>Ca_Kabuli_Chr01</i>       | 14034011                       | (A/G)       |
| 1345        | CakSNP1345     | <i>Kabuli</i>    | <i>Ca_Kabuli_Chr01</i>       | 14045110                       | (T/C)       |
| 1346        | CakSNP1346     | <i>Kabuli</i>    | <i>Ca_Kabuli_Chr01</i>       | 14045239                       | (A/G)       |
| 1347        | CakSNP1347     | <i>Kabuli</i>    | <i>Ca_Kabuli_Chr01</i>       | 14076924                       | (T/C)       |
| 1348        | CakSNP1348     | <i>Kabuli</i>    | <i>Ca_Kabuli_Chr01</i>       | 14101608                       | (C/T)       |
| 1349        | CakSNP1349     | <i>Kabuli</i>    | <i>Ca_Kabuli_Chr01</i>       | 14101621                       | (T/C)       |
| 1350        | CakSNP1350     | <i>Kabuli</i>    | <i>Ca_Kabuli_Chr01</i>       | 14101624                       | (C/T)       |
| 1351        | CakSNP1351     | <i>Kabuli</i>    | <i>Ca_Kabuli_Chr01</i>       | 14101644                       | (A/G)       |
| 1352        | CakSNP1352     | <i>Kabuli</i>    | <i>Ca_Kabuli_Chr01</i>       | 14163638                       | (C/T)       |
| 1353        | CakSNP1353     | <i>Kabuli</i>    | <i>Ca_Kabuli_Chr01</i>       | 14163721                       | (T/C)       |
| 1354        | CakSNP1354     | <i>Kabuli</i>    | <i>Ca_Kabuli_Chr01</i>       | 14163836                       | (A/C)       |
| 1355        | CakSNP1355     | <i>Kabuli</i>    | <i>Ca_Kabuli_Chr01</i>       | 14225210                       | (G/T)       |
| 1356        | CakSNP1356     | <i>Kabuli</i>    | <i>Ca_Kabuli_Chr01</i>       | 14237163                       | (T/G)       |
| 1357        | CakSNP1357     | <i>Kabuli</i>    | <i>Ca_Kabuli_Chr01</i>       | 14237164                       | (T/A)       |
| 1358        | CakSNP1358     | <i>Kabuli</i>    | <i>Ca_Kabuli_Chr01</i>       | 14237273                       | (A/T)       |
| 1359        | CakSNP1359     | <i>Kabuli</i>    | <i>Ca_Kabuli_Chr01</i>       | 14240571                       | (C/T)       |
| 1360        | CakSNP1360     | <i>Kabuli</i>    | <i>Ca_Kabuli_Chr01</i>       | 14259435                       | (G/C)       |
| 1361        | CakSNP1361     | <i>Kabuli</i>    | <i>Ca_Kabuli_Chr01</i>       | 14259455                       | (A/G)       |
| 1362        | CakSNP1362     | <i>Kabuli</i>    | <i>Ca_Kabuli_Chr01</i>       | 14281643                       | (T/C)       |
| 1363        | CakSNP1363     | <i>Kabuli</i>    | <i>Ca_Kabuli_Chr01</i>       | 14348207                       | (C/T)       |

| <b>S.N.</b> | <b>SNP IDs</b> | <b>Cultivars</b> | <b>Chromosomes/scaffolds</b> | <b>Physical positions (bp)</b> | <b>SNPs</b> |
|-------------|----------------|------------------|------------------------------|--------------------------------|-------------|
| 1364        | CakSNP1364     | <i>Kabuli</i>    | <i>Ca_Kabuli_Chr01</i>       | 14393255                       | (A/G)       |
| 1365        | CakSNP1365     | <i>Kabuli</i>    | <i>Ca_Kabuli_Chr01</i>       | 14393313                       | (C/A)       |
| 1366        | CakSNP1366     | <i>Kabuli</i>    | <i>Ca_Kabuli_Chr01</i>       | 14459908                       | (T/C)       |
| 1367        | CakSNP1367     | <i>Kabuli</i>    | <i>Ca_Kabuli_Chr01</i>       | 14576525                       | (C/T)       |
| 1368        | CakSNP1368     | <i>Kabuli</i>    | <i>Ca_Kabuli_Chr01</i>       | 14623271                       | (T/C)       |
| 1369        | CakSNP1369     | <i>Kabuli</i>    | <i>Ca_Kabuli_Chr01</i>       | 14698461                       | (A/T)       |
| 1370        | CakSNP1370     | <i>Kabuli</i>    | <i>Ca_Kabuli_Chr01</i>       | 14801406                       | (A/G)       |
| 1371        | CakSNP1371     | <i>Kabuli</i>    | <i>Ca_Kabuli_Chr01</i>       | 14884940                       | (G/T)       |
| 1372        | CakSNP1372     | <i>Kabuli</i>    | <i>Ca_Kabuli_Chr01</i>       | 14916633                       | (G/C)       |
| 1373        | CakSNP1373     | <i>Kabuli</i>    | <i>Ca_Kabuli_Chr01</i>       | 15126244                       | (T/C)       |
| 1374        | CakSNP1374     | <i>Kabuli</i>    | <i>Ca_Kabuli_Chr01</i>       | 15137319                       | (C/T)       |
| 1375        | CakSNP1375     | <i>Kabuli</i>    | <i>Ca_Kabuli_Chr01</i>       | 15146123                       | (A/G)       |
| 1376        | CakSNP1376     | <i>Kabuli</i>    | <i>Ca_Kabuli_Chr01</i>       | 15146149                       | (G/A)       |
| 1377        | CakSNP1377     | <i>Kabuli</i>    | <i>Ca_Kabuli_Chr01</i>       | 15167641                       | (T/C)       |
| 1378        | CakSNP1378     | <i>Kabuli</i>    | <i>Ca_Kabuli_Chr01</i>       | 15167643                       | (G/A)       |
| 1379        | CakSNP1379     | <i>Kabuli</i>    | <i>Ca_Kabuli_Chr01</i>       | 15196154                       | (T/A)       |
| 1380        | CakSNP1380     | <i>Kabuli</i>    | <i>Ca_Kabuli_Chr01</i>       | 15236202                       | (A/G)       |
| 1381        | CakSNP1381     | <i>Kabuli</i>    | <i>Ca_Kabuli_Chr01</i>       | 15253283                       | (G/A)       |
| 1382        | CakSNP1382     | <i>Kabuli</i>    | <i>Ca_Kabuli_Chr01</i>       | 15253285                       | (A/G)       |
| 1383        | CakSNP1383     | <i>Kabuli</i>    | <i>Ca_Kabuli_Chr01</i>       | 15291748                       | (C/T)       |
| 1384        | CakSNP1384     | <i>Kabuli</i>    | <i>Ca_Kabuli_Chr01</i>       | 15319181                       | (T/C)       |
| 1385        | CakSNP1385     | <i>Kabuli</i>    | <i>Ca_Kabuli_Chr01</i>       | 15611784                       | (T/C)       |
| 1386        | CakSNP1386     | <i>Kabuli</i>    | <i>Ca_Kabuli_Chr01</i>       | 15613071                       | (A/C)       |
| 1387        | CakSNP1387     | <i>Kabuli</i>    | <i>Ca_Kabuli_Chr01</i>       | 15683091                       | (G/A)       |
| 1388        | CakSNP1388     | <i>Kabuli</i>    | <i>Ca_Kabuli_Chr01</i>       | 15683101                       | (A/C)       |
| 1389        | CakSNP1389     | <i>Kabuli</i>    | <i>Ca_Kabuli_Chr01</i>       | 15683106                       | (C/A)       |
| 1390        | CakSNP1390     | <i>Kabuli</i>    | <i>Ca_Kabuli_Chr01</i>       | 15683117                       | (G/T)       |
| 1391        | CakSNP1391     | <i>Kabuli</i>    | <i>Ca_Kabuli_Chr01</i>       | 15683138                       | (A/G)       |
| 1392        | CakSNP1392     | <i>Kabuli</i>    | <i>Ca_Kabuli_Chr01</i>       | 15760638                       | (C/A)       |
| 1393        | CakSNP1393     | <i>Kabuli</i>    | <i>Ca_Kabuli_Chr01</i>       | 15784021                       | (C/T)       |
| 1394        | CakSNP1394     | <i>Kabuli</i>    | <i>Ca_Kabuli_Chr01</i>       | 15802393                       | (G/A)       |
| 1395        | CakSNP1395     | <i>Kabuli</i>    | <i>Ca_Kabuli_Chr01</i>       | 15862493                       | (C/T)       |
| 1396        | CakSNP1396     | <i>Kabuli</i>    | <i>Ca_Kabuli_Chr01</i>       | 15960425                       | (A/C)       |
| 1397        | CakSNP1397     | <i>Kabuli</i>    | <i>Ca_Kabuli_Chr01</i>       | 15965278                       | (G/A)       |
| 1398        | CakSNP1398     | <i>Kabuli</i>    | <i>Ca_Kabuli_Chr01</i>       | 16061242                       | (A/G)       |
| 1399        | CakSNP1399     | <i>Kabuli</i>    | <i>Ca_Kabuli_Chr01</i>       | 16061293                       | (C/G)       |
| 1400        | CakSNP1400     | <i>Kabuli</i>    | <i>Ca_Kabuli_Chr01</i>       | 16061294                       | (T/A)       |
| 1401        | CakSNP1401     | <i>Kabuli</i>    | <i>Ca_Kabuli_Chr01</i>       | 16061295                       | (A/G)       |
| 1402        | CakSNP1402     | <i>Kabuli</i>    | <i>Ca_Kabuli_Chr01</i>       | 16061300                       | (A/G)       |

| <b>S.N.</b> | <b>SNP IDs</b> | <b>Cultivars</b> | <b>Chromosomes/scaffolds</b> | <b>Physical positions (bp)</b> | <b>SNPs</b> |
|-------------|----------------|------------------|------------------------------|--------------------------------|-------------|
| 1403        | CakSNP1403     | <i>Kabuli</i>    | <i>Ca_Kabuli_Chr01</i>       | 16061385                       | (A/G)       |
| 1404        | CakSNP1404     | <i>Kabuli</i>    | <i>Ca_Kabuli_Chr01</i>       | 16061486                       | (G/A)       |
| 1405        | CakSNP1405     | <i>Kabuli</i>    | <i>Ca_Kabuli_Chr01</i>       | 16061541                       | (G/A)       |
| 1406        | CakSNP1406     | <i>Kabuli</i>    | <i>Ca_Kabuli_Chr01</i>       | 16061536                       | (A/C)       |
| 1407        | CakSNP1407     | <i>Kabuli</i>    | <i>Ca_Kabuli_Chr01</i>       | 16081438                       | (T/C)       |
| 1408        | CakSNP1408     | <i>Kabuli</i>    | <i>Ca_Kabuli_Chr01</i>       | 16099437                       | (T/G)       |
| 1409        | CakSNP1409     | <i>Kabuli</i>    | <i>Ca_Kabuli_Chr01</i>       | 16099438                       | (G/A)       |
| 1410        | CakSNP1410     | <i>Kabuli</i>    | <i>Ca_Kabuli_Chr01</i>       | 16099468                       | (G/A)       |
| 1411        | CakSNP1411     | <i>Kabuli</i>    | <i>Ca_Kabuli_Chr01</i>       | 16099444                       | (T/C)       |
| 1412        | CakSNP1412     | <i>Kabuli</i>    | <i>Ca_Kabuli_Chr01</i>       | 16099459                       | (T/C)       |
| 1413        | CakSNP1413     | <i>Kabuli</i>    | <i>Ca_Kabuli_Chr01</i>       | 16099457                       | (T/C)       |
| 1414        | CakSNP1414     | <i>Kabuli</i>    | <i>Ca_Kabuli_Chr01</i>       | 16104255                       | (G/T)       |
| 1415        | CakSNP1415     | <i>Kabuli</i>    | <i>Ca_Kabuli_Chr01</i>       | 16104351                       | (G/A)       |
| 1416        | CakSNP1416     | <i>Kabuli</i>    | <i>Ca_Kabuli_Chr01</i>       | 16104334                       | (T/G)       |
| 1417        | CakSNP1417     | <i>Kabuli</i>    | <i>Ca_Kabuli_Chr01</i>       | 16104298                       | (C/T)       |
| 1418        | CakSNP1418     | <i>Kabuli</i>    | <i>Ca_Kabuli_Chr01</i>       | 16114607                       | (C/A)       |
| 1419        | CakSNP1419     | <i>Kabuli</i>    | <i>Ca_Kabuli_Chr01</i>       | 16196930                       | (A/G)       |
| 1420        | CakSNP1420     | <i>Kabuli</i>    | <i>Ca_Kabuli_Chr01</i>       | 16228049                       | (C/A)       |
| 1421        | CakSNP1421     | <i>Kabuli</i>    | <i>Ca_Kabuli_Chr01</i>       | 16228039                       | (C/A)       |
| 1422        | CakSNP1422     | <i>Kabuli</i>    | <i>Ca_Kabuli_Chr01</i>       | 16289397                       | (G/A)       |
| 1423        | CakSNP1423     | <i>Kabuli</i>    | <i>Ca_Kabuli_Chr01</i>       | 16329161                       | (G/A)       |
| 1424        | CakSNP1424     | <i>Kabuli</i>    | <i>Ca_Kabuli_Chr01</i>       | 16376254                       | (G/T)       |
| 1425        | CakSNP1425     | <i>Kabuli</i>    | <i>Ca_Kabuli_Chr01</i>       | 16379239                       | (A/G)       |
| 1426        | CakSNP1426     | <i>Kabuli</i>    | <i>Ca_Kabuli_Chr01</i>       | 16379258                       | (C/T)       |
| 1427        | CakSNP1427     | <i>Kabuli</i>    | <i>Ca_Kabuli_Chr01</i>       | 16410186                       | (C/T)       |
| 1428        | CakSNP1428     | <i>Kabuli</i>    | <i>Ca_Kabuli_Chr01</i>       | 16419469                       | (C/T)       |
| 1429        | CakSNP1429     | <i>Kabuli</i>    | <i>Ca_Kabuli_Chr01</i>       | 16454432                       | (C/T)       |
| 1430        | CakSNP1430     | <i>Kabuli</i>    | <i>Ca_Kabuli_Chr01</i>       | 16454487                       | (G/C)       |
| 1431        | CakSNP1431     | <i>Kabuli</i>    | <i>Ca_Kabuli_Chr01</i>       | 16493894                       | (A/G)       |
| 1432        | CakSNP1432     | <i>Kabuli</i>    | <i>Ca_Kabuli_Chr01</i>       | 16512011                       | (G/T)       |
| 1433        | CakSNP1433     | <i>Kabuli</i>    | <i>Ca_Kabuli_Chr01</i>       | 16512026                       | (C/T)       |
| 1434        | CakSNP1434     | <i>Kabuli</i>    | <i>Ca_Kabuli_Chr01</i>       | 16512171                       | (G/A)       |
| 1435        | CakSNP1435     | <i>Kabuli</i>    | <i>Ca_Kabuli_Chr01</i>       | 16512195                       | (G/A)       |
| 1436        | CakSNP1436     | <i>Kabuli</i>    | <i>Ca_Kabuli_Chr01</i>       | 16515112                       | (T/C)       |
| 1437        | CakSNP1437     | <i>Kabuli</i>    | <i>Ca_Kabuli_Chr01</i>       | 16527347                       | (T/A)       |
| 1438        | CakSNP1438     | <i>Kabuli</i>    | <i>Ca_Kabuli_Chr01</i>       | 16527366                       | (G/A)       |
| 1439        | CakSNP1439     | <i>Kabuli</i>    | <i>Ca_Kabuli_Chr01</i>       | 16575167                       | (A/G)       |
| 1440        | CakSNP1440     | <i>Kabuli</i>    | <i>Ca_Kabuli_Chr01</i>       | 16636587                       | (G/A)       |
| 1441        | CakSNP1441     | <i>Kabuli</i>    | <i>Ca_Kabuli_Chr01</i>       | 16743569                       | (C/T)       |

| <b>S.N.</b> | <b>SNP IDs</b> | <b>Cultivars</b> | <b>Chromosomes/scaffolds</b> | <b>Physical positions (bp)</b> | <b>SNPs</b> |
|-------------|----------------|------------------|------------------------------|--------------------------------|-------------|
| 1442        | CakSNP1442     | <i>Kabuli</i>    | <i>Ca_Kabuli_Chr01</i>       | 16799112                       | (T/C)       |
| 1443        | CakSNP1443     | <i>Kabuli</i>    | <i>Ca_Kabuli_Chr01</i>       | 16799142                       | (C/T)       |
| 1444        | CakSNP1444     | <i>Kabuli</i>    | <i>Ca_Kabuli_Chr01</i>       | 16813600                       | (T/A)       |
| 1445        | CakSNP1445     | <i>Kabuli</i>    | <i>Ca_Kabuli_Chr01</i>       | 16813603                       | (T/G)       |
| 1446        | CakSNP1446     | <i>Kabuli</i>    | <i>Ca_Kabuli_Chr01</i>       | 16813604                       | (T/C)       |
| 1447        | CakSNP1447     | <i>Kabuli</i>    | <i>Ca_Kabuli_Chr01</i>       | 16813657                       | (A/T)       |
| 1448        | CakSNP1448     | <i>Kabuli</i>    | <i>Ca_Kabuli_Chr01</i>       | 16813616                       | (T/A)       |
| 1449        | CakSNP1449     | <i>Kabuli</i>    | <i>Ca_Kabuli_Chr01</i>       | 16873356                       | (C/T)       |
| 1450        | CakSNP1450     | <i>Kabuli</i>    | <i>Ca_Kabuli_Chr01</i>       | 16877812                       | (C/A)       |
| 1451        | CakSNP1451     | <i>Kabuli</i>    | <i>Ca_Kabuli_Chr01</i>       | 16877829                       | (C/A)       |
| 1452        | CakSNP1452     | <i>Kabuli</i>    | <i>Ca_Kabuli_Chr01</i>       | 16883153                       | (C/T)       |
| 1453        | CakSNP1453     | <i>Kabuli</i>    | <i>Ca_Kabuli_Chr01</i>       | 16901798                       | (C/A)       |
| 1454        | CakSNP1454     | <i>Kabuli</i>    | <i>Ca_Kabuli_Chr01</i>       | 16902129                       | (G/A)       |
| 1455        | CakSNP1455     | <i>Kabuli</i>    | <i>Ca_Kabuli_Chr01</i>       | 16908636                       | (G/A)       |
| 1456        | CakSNP1456     | <i>Kabuli</i>    | <i>Ca_Kabuli_Chr01</i>       | 16933423                       | (T/G)       |
| 1457        | CakSNP1457     | <i>Kabuli</i>    | <i>Ca_Kabuli_Chr01</i>       | 16933431                       | (T/G)       |
| 1458        | CakSNP1458     | <i>Kabuli</i>    | <i>Ca_Kabuli_Chr01</i>       | 17006391                       | (T/C)       |
| 1459        | CakSNP1459     | <i>Kabuli</i>    | <i>Ca_Kabuli_Chr01</i>       | 17023111                       | (G/C)       |
| 1460        | CakSNP1460     | <i>Kabuli</i>    | <i>Ca_Kabuli_Chr01</i>       | 17024083                       | (A/C)       |
| 1461        | CakSNP1461     | <i>Kabuli</i>    | <i>Ca_Kabuli_Chr01</i>       | 17068798                       | (A/C)       |
| 1462        | CakSNP1462     | <i>Kabuli</i>    | <i>Ca_Kabuli_Chr01</i>       | 17092204                       | (C/T)       |
| 1463        | CakSNP1463     | <i>Kabuli</i>    | <i>Ca_Kabuli_Chr01</i>       | 17092404                       | (G/A)       |
| 1464        | CakSNP1464     | <i>Kabuli</i>    | <i>Ca_Kabuli_Chr01</i>       | 17092413                       | (C/T)       |
| 1465        | CakSNP1465     | <i>Kabuli</i>    | <i>Ca_Kabuli_Chr01</i>       | 17093640                       | (T/C)       |
| 1466        | CakSNP1466     | <i>Kabuli</i>    | <i>Ca_Kabuli_Chr01</i>       | 17167019                       | (G/A)       |
| 1467        | CakSNP1467     | <i>Kabuli</i>    | <i>Ca_Kabuli_Chr01</i>       | 17170443                       | (A/T)       |
| 1468        | CakSNP1468     | <i>Kabuli</i>    | <i>Ca_Kabuli_Chr01</i>       | 17170727                       | (T/C)       |
| 1469        | CakSNP1469     | <i>Kabuli</i>    | <i>Ca_Kabuli_Chr01</i>       | 17182711                       | (C/T)       |
| 1470        | CakSNP1470     | <i>Kabuli</i>    | <i>Ca_Kabuli_Chr01</i>       | 17182697                       | (A/T)       |
| 1471        | CakSNP1471     | <i>Kabuli</i>    | <i>Ca_Kabuli_Chr01</i>       | 17182867                       | (G/A)       |
| 1472        | CakSNP1472     | <i>Kabuli</i>    | <i>Ca_Kabuli_Chr01</i>       | 17194835                       | (C/T)       |
| 1473        | CakSNP1473     | <i>Kabuli</i>    | <i>Ca_Kabuli_Chr01</i>       | 17272338                       | (A/C)       |
| 1474        | CakSNP1474     | <i>Kabuli</i>    | <i>Ca_Kabuli_Chr01</i>       | 17272401                       | (C/T)       |
| 1475        | CakSNP1475     | <i>Kabuli</i>    | <i>Ca_Kabuli_Chr01</i>       | 17314880                       | (A/C)       |
| 1476        | CakSNP1476     | <i>Kabuli</i>    | <i>Ca_Kabuli_Chr01</i>       | 17314911                       | (A/G)       |
| 1477        | CakSNP1477     | <i>Kabuli</i>    | <i>Ca_Kabuli_Chr01</i>       | 17314945                       | (T/C)       |
| 1478        | CakSNP1478     | <i>Kabuli</i>    | <i>Ca_Kabuli_Chr01</i>       | 17315046                       | (G/A)       |
| 1479        | CakSNP1479     | <i>Kabuli</i>    | <i>Ca_Kabuli_Chr01</i>       | 17328721                       | (G/A)       |
| 1480        | CakSNP1480     | <i>Kabuli</i>    | <i>Ca_Kabuli_Chr01</i>       | 17328808                       | (G/A)       |

| <b>S.N.</b> | <b>SNP IDs</b> | <b>Cultivars</b> | <b>Chromosomes/scaffolds</b> | <b>Physical positions (bp)</b> | <b>SNPs</b> |
|-------------|----------------|------------------|------------------------------|--------------------------------|-------------|
| 1481        | CakSNP1481     | <i>Kabuli</i>    | <i>Ca_Kabuli_Chr01</i>       | 17332981                       | (C/T)       |
| 1482        | CakSNP1482     | <i>Kabuli</i>    | <i>Ca_Kabuli_Chr01</i>       | 17333056                       | (C/G)       |
| 1483        | CakSNP1483     | <i>Kabuli</i>    | <i>Ca_Kabuli_Chr01</i>       | 17333049                       | (C/T)       |
| 1484        | CakSNP1484     | <i>Kabuli</i>    | <i>Ca_Kabuli_Chr01</i>       | 17340321                       | (T/C)       |
| 1485        | CakSNP1485     | <i>Kabuli</i>    | <i>Ca_Kabuli_Chr01</i>       | 17340350                       | (G/T)       |
| 1486        | CakSNP1486     | <i>Kabuli</i>    | <i>Ca_Kabuli_Chr01</i>       | 17340398                       | (G/T)       |
| 1487        | CakSNP1487     | <i>Kabuli</i>    | <i>Ca_Kabuli_Chr01</i>       | 17359712                       | (A/G)       |
| 1488        | CakSNP1488     | <i>Kabuli</i>    | <i>Ca_Kabuli_Chr01</i>       | 17359688                       | (A/C)       |
| 1489        | CakSNP1489     | <i>Kabuli</i>    | <i>Ca_Kabuli_Chr01</i>       | 17359686                       | (C/T)       |
| 1490        | CakSNP1490     | <i>Kabuli</i>    | <i>Ca_Kabuli_Chr01</i>       | 17359682                       | (A/C)       |
| 1491        | CakSNP1491     | <i>Kabuli</i>    | <i>Ca_Kabuli_Chr01</i>       | 17386549                       | (C/T)       |
| 1492        | CakSNP1492     | <i>Kabuli</i>    | <i>Ca_Kabuli_Chr01</i>       | 17386603                       | (A/T)       |
| 1493        | CakSNP1493     | <i>Kabuli</i>    | <i>Ca_Kabuli_Chr01</i>       | 17395543                       | (C/A)       |
| 1494        | CakSNP1494     | <i>Kabuli</i>    | <i>Ca_Kabuli_Chr01</i>       | 17437336                       | (G/C)       |
| 1495        | CakSNP1495     | <i>Kabuli</i>    | <i>Ca_Kabuli_Chr01</i>       | 17558885                       | (T/C)       |
| 1496        | CakSNP1496     | <i>Kabuli</i>    | <i>Ca_Kabuli_Chr01</i>       | 17558940                       | (A/G)       |
| 1497        | CakSNP1497     | <i>Kabuli</i>    | <i>Ca_Kabuli_Chr01</i>       | 17558975                       | (A/G)       |
| 1498        | CakSNP1498     | <i>Kabuli</i>    | <i>Ca_Kabuli_Chr01</i>       | 17576793                       | (T/G)       |
| 1499        | CakSNP1499     | <i>Kabuli</i>    | <i>Ca_Kabuli_Chr01</i>       | 17761244                       | (T/C)       |
| 1500        | CakSNP1500     | <i>Kabuli</i>    | <i>Ca_Kabuli_Chr01</i>       | 17763949                       | (G/A)       |
| 1501        | CakSNP1501     | <i>Kabuli</i>    | <i>Ca_Kabuli_Chr01</i>       | 17819374                       | (A/C)       |
| 1502        | CakSNP1502     | <i>Kabuli</i>    | <i>Ca_Kabuli_Chr01</i>       | 17856892                       | (A/G)       |
| 1503        | CakSNP1503     | <i>Kabuli</i>    | <i>Ca_Kabuli_Chr01</i>       | 17857089                       | (T/A)       |
| 1504        | CakSNP1504     | <i>Kabuli</i>    | <i>Ca_Kabuli_Chr01</i>       | 17880143                       | (T/C)       |
| 1505        | CakSNP1505     | <i>Kabuli</i>    | <i>Ca_Kabuli_Chr01</i>       | 17880185                       | (T/C)       |
| 1506        | CakSNP1506     | <i>Kabuli</i>    | <i>Ca_Kabuli_Chr01</i>       | 17961779                       | (T/C)       |
| 1507        | CakSNP1507     | <i>Kabuli</i>    | <i>Ca_Kabuli_Chr01</i>       | 17983301                       | (T/G)       |
| 1508        | CakSNP1508     | <i>Kabuli</i>    | <i>Ca_Kabuli_Chr01</i>       | 17983310                       | (T/G)       |
| 1509        | CakSNP1509     | <i>Kabuli</i>    | <i>Ca_Kabuli_Chr01</i>       | 18009665                       | (C/G)       |
| 1510        | CakSNP1510     | <i>Kabuli</i>    | <i>Ca_Kabuli_Chr01</i>       | 18050590                       | (G/T)       |
| 1511        | CakSNP1511     | <i>Kabuli</i>    | <i>Ca_Kabuli_Chr01</i>       | 18064930                       | (C/T)       |
| 1512        | CakSNP1512     | <i>Kabuli</i>    | <i>Ca_Kabuli_Chr01</i>       | 18065239                       | (T/C)       |
| 1513        | CakSNP1513     | <i>Kabuli</i>    | <i>Ca_Kabuli_Chr01</i>       | 18092704                       | (T/G)       |
| 1514        | CakSNP1514     | <i>Kabuli</i>    | <i>Ca_Kabuli_Chr01</i>       | 18092761                       | (C/T)       |
| 1515        | CakSNP1515     | <i>Kabuli</i>    | <i>Ca_Kabuli_Chr01</i>       | 18098516                       | (C/T)       |
| 1516        | CakSNP1516     | <i>Kabuli</i>    | <i>Ca_Kabuli_Chr01</i>       | 18099331                       | (C/T)       |
| 1517        | CakSNP1517     | <i>Kabuli</i>    | <i>Ca_Kabuli_Chr01</i>       | 18099334                       | (T/A)       |
| 1518        | CakSNP1518     | <i>Kabuli</i>    | <i>Ca_Kabuli_Chr01</i>       | 18112318                       | (A/G)       |
| 1519        | CakSNP1519     | <i>Kabuli</i>    | <i>Ca_Kabuli_Chr01</i>       | 18112353                       | (T/C)       |



| <b>S.N.</b> | <b>SNP IDs</b> | <b>Cultivars</b> | <b>Chromosomes/scaffolds</b> | <b>Physical positions (bp)</b> | <b>SNPs</b> |
|-------------|----------------|------------------|------------------------------|--------------------------------|-------------|
| 1520        | CakSNP1520     | <i>Kabuli</i>    | <i>Ca_Kabuli_Chr01</i>       | 18131516                       | (T/G)       |
| 1521        | CakSNP1521     | <i>Kabuli</i>    | <i>Ca_Kabuli_Chr01</i>       | 18131545                       | (A/T)       |
| 1522        | CakSNP1522     | <i>Kabuli</i>    | <i>Ca_Kabuli_Chr01</i>       | 18131898                       | (G/A)       |
| 1523        | CakSNP1523     | <i>Kabuli</i>    | <i>Ca_Kabuli_Chr01</i>       | 18141990                       | (C/A)       |
| 1524        | CakSNP1524     | <i>Kabuli</i>    | <i>Ca_Kabuli_Chr01</i>       | 18144107                       | (C/G)       |
| 1525        | CakSNP1525     | <i>Kabuli</i>    | <i>Ca_Kabuli_Chr01</i>       | 18144137                       | (T/A)       |
| 1526        | CakSNP1526     | <i>Kabuli</i>    | <i>Ca_Kabuli_Chr01</i>       | 18147011                       | (C/G)       |
| 1527        | CakSNP1527     | <i>Kabuli</i>    | <i>Ca_Kabuli_Chr01</i>       | 18150151                       | (G/A)       |
| 1528        | CakSNP1528     | <i>Kabuli</i>    | <i>Ca_Kabuli_Chr01</i>       | 18153870                       | (T/G)       |
| 1529        | CakSNP1529     | <i>Kabuli</i>    | <i>Ca_Kabuli_Chr01</i>       | 18154083                       | (A/G)       |
| 1530        | CakSNP1530     | <i>Kabuli</i>    | <i>Ca_Kabuli_Chr01</i>       | 18156634                       | (A/G)       |
| 1531        | CakSNP1531     | <i>Kabuli</i>    | <i>Ca_Kabuli_Chr01</i>       | 18172762                       | (G/T)       |
| 1532        | CakSNP1532     | <i>Kabuli</i>    | <i>Ca_Kabuli_Chr01</i>       | 18198444                       | (C/T)       |
| 1533        | CakSNP1533     | <i>Kabuli</i>    | <i>Ca_Kabuli_Chr01</i>       | 18488172                       | (G/A)       |
| 1534        | CakSNP1534     | <i>Kabuli</i>    | <i>Ca_Kabuli_Chr01</i>       | 18746045                       | (T/G)       |
| 1535        | CakSNP1535     | <i>Kabuli</i>    | <i>Ca_Kabuli_Chr01</i>       | 18763916                       | (G/A)       |
| 1536        | CakSNP1536     | <i>Kabuli</i>    | <i>Ca_Kabuli_Chr01</i>       | 18763911                       | (C/A)       |
| 1537        | CakSNP1537     | <i>Kabuli</i>    | <i>Ca_Kabuli_Chr01</i>       | 18764225                       | (C/T)       |
| 1538        | CakSNP1538     | <i>Kabuli</i>    | <i>Ca_Kabuli_Chr01</i>       | 18768563                       | (C/A)       |
| 1539        | CakSNP1539     | <i>Kabuli</i>    | <i>Ca_Kabuli_Chr01</i>       | 18797330                       | (T/C)       |
| 1540        | CakSNP1540     | <i>Kabuli</i>    | <i>Ca_Kabuli_Chr01</i>       | 18890559                       | (A/G)       |
| 1541        | CakSNP1541     | <i>Kabuli</i>    | <i>Ca_Kabuli_Chr01</i>       | 18890616                       | (G/A)       |
| 1542        | CakSNP1542     | <i>Kabuli</i>    | <i>Ca_Kabuli_Chr01</i>       | 18890833                       | (G/A)       |
| 1543        | CakSNP1543     | <i>Kabuli</i>    | <i>Ca_Kabuli_Chr01</i>       | 18910213                       | (C/T)       |
| 1544        | CakSNP1544     | <i>Kabuli</i>    | <i>Ca_Kabuli_Chr01</i>       | 18910202                       | (G/A)       |
| 1545        | CakSNP1545     | <i>Kabuli</i>    | <i>Ca_Kabuli_Chr01</i>       | 18910173                       | (T/C)       |
| 1546        | CakSNP1546     | <i>Kabuli</i>    | <i>Ca_Kabuli_Chr01</i>       | 19000445                       | (T/C)       |
| 1547        | CakSNP1547     | <i>Kabuli</i>    | <i>Ca_Kabuli_Chr01</i>       | 19055085                       | (C/T)       |
| 1548        | CakSNP1548     | <i>Kabuli</i>    | <i>Ca_Kabuli_Chr01</i>       | 19130894                       | (T/C)       |
| 1549        | CakSNP1549     | <i>Kabuli</i>    | <i>Ca_Kabuli_Chr01</i>       | 19130884                       | (C/A)       |
| 1550        | CakSNP1550     | <i>Kabuli</i>    | <i>Ca_Kabuli_Chr01</i>       | 19130883                       | (C/A)       |
| 1551        | CakSNP1551     | <i>Kabuli</i>    | <i>Ca_Kabuli_Chr01</i>       | 19130872                       | (G/A)       |
| 1552        | CakSNP1552     | <i>Kabuli</i>    | <i>Ca_Kabuli_Chr01</i>       | 19130833                       | (G/T)       |
| 1553        | CakSNP1553     | <i>Kabuli</i>    | <i>Ca_Kabuli_Chr01</i>       | 19130831                       | (A/G)       |
| 1554        | CakSNP1554     | <i>Kabuli</i>    | <i>Ca_Kabuli_Chr01</i>       | 19130848                       | (C/T)       |
| 1555        | CakSNP1555     | <i>Kabuli</i>    | <i>Ca_Kabuli_Chr01</i>       | 19130853                       | (G/A)       |
| 1556        | CakSNP1556     | <i>Kabuli</i>    | <i>Ca_Kabuli_Chr01</i>       | 19164976                       | (T/C)       |
| 1557        | CakSNP1557     | <i>Kabuli</i>    | <i>Ca_Kabuli_Chr01</i>       | 19166597                       | (A/G)       |
| 1558        | CakSNP1558     | <i>Kabuli</i>    | <i>Ca_Kabuli_Chr01</i>       | 19218067                       | (G/A)       |

| <b>S.N.</b> | <b>SNP IDs</b> | <b>Cultivars</b> | <b>Chromosomes/scaffolds</b> | <b>Physical positions (bp)</b> | <b>SNPs</b> |
|-------------|----------------|------------------|------------------------------|--------------------------------|-------------|
| 1559        | CakSNP1559     | <i>Kabuli</i>    | <i>Ca_Kabuli_Chr01</i>       | 19218093                       | (T/G)       |
| 1560        | CakSNP1560     | <i>Kabuli</i>    | <i>Ca_Kabuli_Chr01</i>       | 19252952                       | (G/T)       |
| 1561        | CakSNP1561     | <i>Kabuli</i>    | <i>Ca_Kabuli_Chr01</i>       | 19252938                       | (G/A)       |
| 1562        | CakSNP1562     | <i>Kabuli</i>    | <i>Ca_Kabuli_Chr01</i>       | 19253655                       | (C/T)       |
| 1563        | CakSNP1563     | <i>Kabuli</i>    | <i>Ca_Kabuli_Chr01</i>       | 19254161                       | (G/A)       |
| 1564        | CakSNP1564     | <i>Kabuli</i>    | <i>Ca_Kabuli_Chr01</i>       | 19276489                       | (A/G)       |
| 1565        | CakSNP1565     | <i>Kabuli</i>    | <i>Ca_Kabuli_Chr01</i>       | 19276697                       | (C/G)       |
| 1566        | CakSNP1566     | <i>Kabuli</i>    | <i>Ca_Kabuli_Chr01</i>       | 19359812                       | (A/C)       |
| 1567        | CakSNP1567     | <i>Kabuli</i>    | <i>Ca_Kabuli_Chr01</i>       | 19359844                       | (C/A)       |
| 1568        | CakSNP1568     | <i>Kabuli</i>    | <i>Ca_Kabuli_Chr01</i>       | 19399112                       | (C/T)       |
| 1569        | CakSNP1569     | <i>Kabuli</i>    | <i>Ca_Kabuli_Chr01</i>       | 19526320                       | (T/C)       |
| 1570        | CakSNP1570     | <i>Kabuli</i>    | <i>Ca_Kabuli_Chr01</i>       | 19526531                       | (C/G)       |
| 1571        | CakSNP1571     | <i>Kabuli</i>    | <i>Ca_Kabuli_Chr01</i>       | 19526548                       | (G/A)       |
| 1572        | CakSNP1572     | <i>Kabuli</i>    | <i>Ca_Kabuli_Chr01</i>       | 19526561                       | (T/C)       |
| 1573        | CakSNP1573     | <i>Kabuli</i>    | <i>Ca_Kabuli_Chr01</i>       | 19526592                       | (T/A)       |
| 1574        | CakSNP1574     | <i>Kabuli</i>    | <i>Ca_Kabuli_Chr01</i>       | 19526652                       | (G/T)       |
| 1575        | CakSNP1575     | <i>Kabuli</i>    | <i>Ca_Kabuli_Chr01</i>       | 19526632                       | (C/T)       |
| 1576        | CakSNP1576     | <i>Kabuli</i>    | <i>Ca_Kabuli_Chr01</i>       | 19572408                       | (C/T)       |
| 1577        | CakSNP1577     | <i>Kabuli</i>    | <i>Ca_Kabuli_Chr01</i>       | 19572494                       | (G/C)       |
| 1578        | CakSNP1578     | <i>Kabuli</i>    | <i>Ca_Kabuli_Chr01</i>       | 19591671                       | (A/G)       |
| 1579        | CakSNP1579     | <i>Kabuli</i>    | <i>Ca_Kabuli_Chr01</i>       | 19877654                       | (A/T)       |
| 1580        | CakSNP1580     | <i>Kabuli</i>    | <i>Ca_Kabuli_Chr01</i>       | 19902735                       | (T/A)       |
| 1581        | CakSNP1581     | <i>Kabuli</i>    | <i>Ca_Kabuli_Chr01</i>       | 19903665                       | (A/G)       |
| 1582        | CakSNP1582     | <i>Kabuli</i>    | <i>Ca_Kabuli_Chr01</i>       | 19903683                       | (G/A)       |
| 1583        | CakSNP1583     | <i>Kabuli</i>    | <i>Ca_Kabuli_Chr01</i>       | 19903686                       | (T/A)       |
| 1584        | CakSNP1584     | <i>Kabuli</i>    | <i>Ca_Kabuli_Chr01</i>       | 19903690                       | (A/G)       |
| 1585        | CakSNP1585     | <i>Kabuli</i>    | <i>Ca_Kabuli_Chr01</i>       | 19903693                       | (G/T)       |
| 1586        | CakSNP1586     | <i>Kabuli</i>    | <i>Ca_Kabuli_Chr01</i>       | 19903701                       | (G/A)       |
| 1587        | CakSNP1587     | <i>Kabuli</i>    | <i>Ca_Kabuli_Chr01</i>       | 19903704                       | (G/A)       |
| 1588        | CakSNP1588     | <i>Kabuli</i>    | <i>Ca_Kabuli_Chr01</i>       | 20004655                       | (A/G)       |
| 1589        | CakSNP1589     | <i>Kabuli</i>    | <i>Ca_Kabuli_Chr01</i>       | 20005747                       | (C/T)       |
| 1590        | CakSNP1590     | <i>Kabuli</i>    | <i>Ca_Kabuli_Chr01</i>       | 20016525                       | (C/T)       |
| 1591        | CakSNP1591     | <i>Kabuli</i>    | <i>Ca_Kabuli_Chr01</i>       | 20070045                       | (A/G)       |
| 1592        | CakSNP1592     | <i>Kabuli</i>    | <i>Ca_Kabuli_Chr01</i>       | 20070197                       | (T/C)       |
| 1593        | CakSNP1593     | <i>Kabuli</i>    | <i>Ca_Kabuli_Chr01</i>       | 20091291                       | (T/G)       |
| 1594        | CakSNP1594     | <i>Kabuli</i>    | <i>Ca_Kabuli_Chr01</i>       | 20092571                       | (C/G)       |
| 1595        | CakSNP1595     | <i>Kabuli</i>    | <i>Ca_Kabuli_Chr01</i>       | 20092677                       | (C/A)       |
| 1596        | CakSNP1596     | <i>Kabuli</i>    | <i>Ca_Kabuli_Chr01</i>       | 21822975                       | (A/G)       |
| 1597        | CakSNP1597     | <i>Kabuli</i>    | <i>Ca_Kabuli_Chr01</i>       | 21881133                       | (G/A)       |

| <b>S.N.</b> | <b>SNP IDs</b> | <b>Cultivars</b> | <b>Chromosomes/scaffolds</b> | <b>Physical positions (bp)</b> | <b>SNPs</b> |
|-------------|----------------|------------------|------------------------------|--------------------------------|-------------|
| 1598        | CakSNP1598     | <i>Kabuli</i>    | <i>Ca_Kabuli_Chr01</i>       | 21881112                       | (C/T)       |
| 1599        | CakSNP1599     | <i>Kabuli</i>    | <i>Ca_Kabuli_Chr01</i>       | 21881103                       | (G/A)       |
| 1600        | CakSNP1600     | <i>Kabuli</i>    | <i>Ca_Kabuli_Chr01</i>       | 21881094                       | (G/A)       |
| 1601        | CakSNP1601     | <i>Kabuli</i>    | <i>Ca_Kabuli_Chr01</i>       | 21918747                       | (G/A)       |
| 1602        | CakSNP1602     | <i>Kabuli</i>    | <i>Ca_Kabuli_Chr01</i>       | 22344003                       | (G/A)       |
| 1603        | CakSNP1603     | <i>Kabuli</i>    | <i>Ca_Kabuli_Chr01</i>       | 22437033                       | (C/T)       |
| 1604        | CakSNP1604     | <i>Kabuli</i>    | <i>Ca_Kabuli_Chr01</i>       | 22465555                       | (C/T)       |
| 1605        | CakSNP1605     | <i>Kabuli</i>    | <i>Ca_Kabuli_Chr01</i>       | 22465692                       | (A/G)       |
| 1606        | CakSNP1606     | <i>Kabuli</i>    | <i>Ca_Kabuli_Chr01</i>       | 22719581                       | (T/G)       |
| 1607        | CakSNP1607     | <i>Kabuli</i>    | <i>Ca_Kabuli_Chr01</i>       | 22743361                       | (T/G)       |
| 1608        | CakSNP1608     | <i>Kabuli</i>    | <i>Ca_Kabuli_Chr01</i>       | 23122951                       | (A/G)       |
| 1609        | CakSNP1609     | <i>Kabuli</i>    | <i>Ca_Kabuli_Chr01</i>       | 23128921                       | (T/A)       |
| 1610        | CakSNP1610     | <i>Kabuli</i>    | <i>Ca_Kabuli_Chr01</i>       | 23128979                       | (G/T)       |
| 1611        | CakSNP1611     | <i>Kabuli</i>    | <i>Ca_Kabuli_Chr01</i>       | 23129094                       | (C/T)       |
| 1612        | CakSNP1612     | <i>Kabuli</i>    | <i>Ca_Kabuli_Chr01</i>       | 23131178                       | (A/C)       |
| 1613        | CakSNP1613     | <i>Kabuli</i>    | <i>Ca_Kabuli_Chr01</i>       | 23131914                       | (T/C)       |
| 1614        | CakSNP1614     | <i>Kabuli</i>    | <i>Ca_Kabuli_Chr01</i>       | 23148736                       | (A/C)       |
| 1615        | CakSNP1615     | <i>Kabuli</i>    | <i>Ca_Kabuli_Chr01</i>       | 23149053                       | (A/G)       |
| 1616        | CakSNP1616     | <i>Kabuli</i>    | <i>Ca_Kabuli_Chr01</i>       | 23149096                       | (A/C)       |
| 1617        | CakSNP1617     | <i>Kabuli</i>    | <i>Ca_Kabuli_Chr01</i>       | 23341499                       | (C/G)       |
| 1618        | CakSNP1618     | <i>Kabuli</i>    | <i>Ca_Kabuli_Chr01</i>       | 23382483                       | (T/A)       |
| 1619        | CakSNP1619     | <i>Kabuli</i>    | <i>Ca_Kabuli_Chr01</i>       | 23382454                       | (G/T)       |
| 1620        | CakSNP1620     | <i>Kabuli</i>    | <i>Ca_Kabuli_Chr01</i>       | 23382664                       | (C/T)       |
| 1621        | CakSNP1621     | <i>Kabuli</i>    | <i>Ca_Kabuli_Chr01</i>       | 23382645                       | (C/G)       |
| 1622        | CakSNP1622     | <i>Kabuli</i>    | <i>Ca_Kabuli_Chr01</i>       | 23915127                       | (C/G)       |
| 1623        | CakSNP1623     | <i>Kabuli</i>    | <i>Ca_Kabuli_Chr01</i>       | 23941438                       | (G/A)       |
| 1624        | CakSNP1624     | <i>Kabuli</i>    | <i>Ca_Kabuli_Chr01</i>       | 23941518                       | (C/T)       |
| 1625        | CakSNP1625     | <i>Kabuli</i>    | <i>Ca_Kabuli_Chr01</i>       | 24070908                       | (C/T)       |
| 1626        | CakSNP1626     | <i>Kabuli</i>    | <i>Ca_Kabuli_Chr01</i>       | 24070968                       | (C/T)       |
| 1627        | CakSNP1627     | <i>Kabuli</i>    | <i>Ca_Kabuli_Chr01</i>       | 24071007                       | (C/A)       |
| 1628        | CakSNP1628     | <i>Kabuli</i>    | <i>Ca_Kabuli_Chr01</i>       | 24071014                       | (T/G)       |
| 1629        | CakSNP1629     | <i>Kabuli</i>    | <i>Ca_Kabuli_Chr01</i>       | 24173273                       | (A/G)       |
| 1630        | CakSNP1630     | <i>Kabuli</i>    | <i>Ca_Kabuli_Chr01</i>       | 24450415                       | (T/C)       |
| 1631        | CakSNP1631     | <i>Kabuli</i>    | <i>Ca_Kabuli_Chr01</i>       | 24450511                       | (A/G)       |
| 1632        | CakSNP1632     | <i>Kabuli</i>    | <i>Ca_Kabuli_Chr01</i>       | 24450483                       | (T/G)       |
| 1633        | CakSNP1633     | <i>Kabuli</i>    | <i>Ca_Kabuli_Chr01</i>       | 24693506                       | (C/T)       |
| 1634        | CakSNP1634     | <i>Kabuli</i>    | <i>Ca_Kabuli_Chr01</i>       | 24693602                       | (A/G)       |
| 1635        | CakSNP1635     | <i>Kabuli</i>    | <i>Ca_Kabuli_Chr01</i>       | 24693601                       | (C/T)       |
| 1636        | CakSNP1636     | <i>Kabuli</i>    | <i>Ca_Kabuli_Chr01</i>       | 24693586                       | (C/T)       |

| <b>S.N.</b> | <b>SNP IDs</b> | <b>Cultivars</b> | <b>Chromosomes/scaffolds</b> | <b>Physical positions (bp)</b> | <b>SNPs</b> |
|-------------|----------------|------------------|------------------------------|--------------------------------|-------------|
| 1637        | CakSNP1637     | <i>Kabuli</i>    | <i>Ca_Kabuli_Chr01</i>       | 24693571                       | (G/A)       |
| 1638        | CakSNP1638     | <i>Kabuli</i>    | <i>Ca_Kabuli_Chr01</i>       | 24693550                       | (G/A)       |
| 1639        | CakSNP1639     | <i>Kabuli</i>    | <i>Ca_Kabuli_Chr01</i>       | 24693533                       | (G/A)       |
| 1640        | CakSNP1640     | <i>Kabuli</i>    | <i>Ca_Kabuli_Chr01</i>       | 24693521                       | (G/A)       |
| 1641        | CakSNP1641     | <i>Kabuli</i>    | <i>Ca_Kabuli_Chr01</i>       | 24828169                       | (C/T)       |
| 1642        | CakSNP1642     | <i>Kabuli</i>    | <i>Ca_Kabuli_Chr01</i>       | 24828245                       | (A/C)       |
| 1643        | CakSNP1643     | <i>Kabuli</i>    | <i>Ca_Kabuli_Chr01</i>       | 24845148                       | (A/C)       |
| 1644        | CakSNP1644     | <i>Kabuli</i>    | <i>Ca_Kabuli_Chr01</i>       | 24983908                       | (A/G)       |
| 1645        | CakSNP1645     | <i>Kabuli</i>    | <i>Ca_Kabuli_Chr01</i>       | 25039836                       | (T/C)       |
| 1646        | CakSNP1646     | <i>Kabuli</i>    | <i>Ca_Kabuli_Chr01</i>       | 25083482                       | (A/C)       |
| 1647        | CakSNP1647     | <i>Kabuli</i>    | <i>Ca_Kabuli_Chr01</i>       | 25083534                       | (A/C)       |
| 1648        | CakSNP1648     | <i>Kabuli</i>    | <i>Ca_Kabuli_Chr01</i>       | 25175124                       | (C/T)       |
| 1649        | CakSNP1649     | <i>Kabuli</i>    | <i>Ca_Kabuli_Chr01</i>       | 25176162                       | (C/A)       |
| 1650        | CakSNP1650     | <i>Kabuli</i>    | <i>Ca_Kabuli_Chr01</i>       | 25192363                       | (T/C)       |
| 1651        | CakSNP1651     | <i>Kabuli</i>    | <i>Ca_Kabuli_Chr01</i>       | 25524382                       | (C/T)       |
| 1652        | CakSNP1652     | <i>Kabuli</i>    | <i>Ca_Kabuli_Chr01</i>       | 25524425                       | (C/T)       |
| 1653        | CakSNP1653     | <i>Kabuli</i>    | <i>Ca_Kabuli_Chr01</i>       | 25524441                       | (T/C)       |
| 1654        | CakSNP1654     | <i>Kabuli</i>    | <i>Ca_Kabuli_Chr01</i>       | 25524459                       | (C/G)       |
| 1655        | CakSNP1655     | <i>Kabuli</i>    | <i>Ca_Kabuli_Chr01</i>       | 25524532                       | (T/C)       |
| 1656        | CakSNP1656     | <i>Kabuli</i>    | <i>Ca_Kabuli_Chr01</i>       | 25524519                       | (C/T)       |
| 1657        | CakSNP1657     | <i>Kabuli</i>    | <i>Ca_Kabuli_Chr01</i>       | 25524481                       | (T/A)       |
| 1658        | CakSNP1658     | <i>Kabuli</i>    | <i>Ca_Kabuli_Chr01</i>       | 25524480                       | (G/A)       |
| 1659        | CakSNP1659     | <i>Kabuli</i>    | <i>Ca_Kabuli_Chr01</i>       | 25524473                       | (C/T)       |
| 1660        | CakSNP1660     | <i>Kabuli</i>    | <i>Ca_Kabuli_Chr01</i>       | 25524465                       | (A/G)       |
| 1661        | CakSNP1661     | <i>Kabuli</i>    | <i>Ca_Kabuli_Chr01</i>       | 25524460                       | (G/A)       |
| 1662        | CakSNP1662     | <i>Kabuli</i>    | <i>Ca_Kabuli_Chr01</i>       | 25524458                       | (G/A)       |
| 1663        | CakSNP1663     | <i>Kabuli</i>    | <i>Ca_Kabuli_Chr01</i>       | 25524456                       | (C/T)       |
| 1664        | CakSNP1664     | <i>Kabuli</i>    | <i>Ca_Kabuli_Chr01</i>       | 25524455                       | (G/A)       |
| 1665        | CakSNP1665     | <i>Kabuli</i>    | <i>Ca_Kabuli_Chr01</i>       | 25524453                       | (C/T)       |
| 1666        | CakSNP1666     | <i>Kabuli</i>    | <i>Ca_Kabuli_Chr01</i>       | 25524451                       | (A/T)       |
| 1667        | CakSNP1667     | <i>Kabuli</i>    | <i>Ca_Kabuli_Chr01</i>       | 25524450                       | (C/T)       |
| 1668        | CakSNP1668     | <i>Kabuli</i>    | <i>Ca_Kabuli_Chr01</i>       | 25524464                       | (G/A)       |
| 1669        | CakSNP1669     | <i>Kabuli</i>    | <i>Ca_Kabuli_Chr01</i>       | 25524478                       | (C/A)       |
| 1670        | CakSNP1670     | <i>Kabuli</i>    | <i>Ca_Kabuli_Chr01</i>       | 25524488                       | (G/T)       |
| 1671        | CakSNP1671     | <i>Kabuli</i>    | <i>Ca_Kabuli_Chr01</i>       | 25524498                       | (G/C)       |
| 1672        | CakSNP1672     | <i>Kabuli</i>    | <i>Ca_Kabuli_Chr01</i>       | 25524505                       | (A/G)       |
| 1673        | CakSNP1673     | <i>Kabuli</i>    | <i>Ca_Kabuli_Chr01</i>       | 25524520                       | (C/T)       |
| 1674        | CakSNP1674     | <i>Kabuli</i>    | <i>Ca_Kabuli_Chr01</i>       | 25524522                       | (G/A)       |
| 1675        | CakSNP1675     | <i>Kabuli</i>    | <i>Ca_Kabuli_Chr01</i>       | 25524524                       | (C/T)       |

| <b>S.N.</b> | <b>SNP IDs</b> | <b>Cultivars</b> | <b>Chromosomes/scaffolds</b> | <b>Physical positions (bp)</b> | <b>SNPs</b> |
|-------------|----------------|------------------|------------------------------|--------------------------------|-------------|
| 1676        | CakSNP1676     | <i>Kabuli</i>    | <i>Ca_Kabuli_Chr01</i>       | 25732004                       | (T/C)       |
| 1677        | CakSNP1677     | <i>Kabuli</i>    | <i>Ca_Kabuli_Chr01</i>       | 25887539                       | (G/A)       |
| 1678        | CakSNP1678     | <i>Kabuli</i>    | <i>Ca_Kabuli_Chr01</i>       | 25987201                       | (A/C)       |
| 1679        | CakSNP1679     | <i>Kabuli</i>    | <i>Ca_Kabuli_Chr01</i>       | 26026817                       | (C/T)       |
| 1680        | CakSNP1680     | <i>Kabuli</i>    | <i>Ca_Kabuli_Chr01</i>       | 26190096                       | (G/A)       |
| 1681        | CakSNP1681     | <i>Kabuli</i>    | <i>Ca_Kabuli_Chr01</i>       | 26190050                       | (G/A)       |
| 1682        | CakSNP1682     | <i>Kabuli</i>    | <i>Ca_Kabuli_Chr01</i>       | 26481730                       | (C/T)       |
| 1683        | CakSNP1683     | <i>Kabuli</i>    | <i>Ca_Kabuli_Chr01</i>       | 26481747                       | (T/G)       |
| 1684        | CakSNP1684     | <i>Kabuli</i>    | <i>Ca_Kabuli_Chr01</i>       | 26484868                       | (G/C)       |
| 1685        | CakSNP1685     | <i>Kabuli</i>    | <i>Ca_Kabuli_Chr01</i>       | 26574098                       | (C/T)       |
| 1686        | CakSNP1686     | <i>Kabuli</i>    | <i>Ca_Kabuli_Chr01</i>       | 26574146                       | (C/T)       |
| 1687        | CakSNP1687     | <i>Kabuli</i>    | <i>Ca_Kabuli_Chr01</i>       | 26579621                       | (A/C)       |
| 1688        | CakSNP1688     | <i>Kabuli</i>    | <i>Ca_Kabuli_Chr01</i>       | 26746094                       | (A/T)       |
| 1689        | CakSNP1689     | <i>Kabuli</i>    | <i>Ca_Kabuli_Chr01</i>       | 26767522                       | (A/G)       |
| 1690        | CakSNP1690     | <i>Kabuli</i>    | <i>Ca_Kabuli_Chr01</i>       | 26767514                       | (A/G)       |
| 1691        | CakSNP1691     | <i>Kabuli</i>    | <i>Ca_Kabuli_Chr01</i>       | 26784404                       | (G/A)       |
| 1692        | CakSNP1692     | <i>Kabuli</i>    | <i>Ca_Kabuli_Chr01</i>       | 26784421                       | (G/T)       |
| 1693        | CakSNP1693     | <i>Kabuli</i>    | <i>Ca_Kabuli_Chr01</i>       | 26784422                       | (C/T)       |
| 1694        | CakSNP1694     | <i>Kabuli</i>    | <i>Ca_Kabuli_Chr01</i>       | 26784464                       | (C/T)       |
| 1695        | CakSNP1695     | <i>Kabuli</i>    | <i>Ca_Kabuli_Chr01</i>       | 26784548                       | (C/A)       |
| 1696        | CakSNP1696     | <i>Kabuli</i>    | <i>Ca_Kabuli_Chr01</i>       | 26784570                       | (A/G)       |
| 1697        | CakSNP1697     | <i>Kabuli</i>    | <i>Ca_Kabuli_Chr01</i>       | 26784592                       | (A/G)       |
| 1698        | CakSNP1698     | <i>Kabuli</i>    | <i>Ca_Kabuli_Chr01</i>       | 26784618                       | (G/A)       |
| 1699        | CakSNP1699     | <i>Kabuli</i>    | <i>Ca_Kabuli_Chr01</i>       | 26784732                       | (C/G)       |
| 1700        | CakSNP1700     | <i>Kabuli</i>    | <i>Ca_Kabuli_Chr01</i>       | 26785566                       | (T/G)       |
| 1701        | CakSNP1701     | <i>Kabuli</i>    | <i>Ca_Kabuli_Chr01</i>       | 26807401                       | (A/G)       |
| 1702        | CakSNP1702     | <i>Kabuli</i>    | <i>Ca_Kabuli_Chr01</i>       | 26807395                       | (T/G)       |
| 1703        | CakSNP1703     | <i>Kabuli</i>    | <i>Ca_Kabuli_Chr01</i>       | 26856541                       | (A/T)       |
| 1704        | CakSNP1704     | <i>Kabuli</i>    | <i>Ca_Kabuli_Chr01</i>       | 26856691                       | (G/A)       |
| 1705        | CakSNP1705     | <i>Kabuli</i>    | <i>Ca_Kabuli_Chr01</i>       | 26921471                       | (C/T)       |
| 1706        | CakSNP1706     | <i>Kabuli</i>    | <i>Ca_Kabuli_Chr01</i>       | 26921487                       | (C/A)       |
| 1707        | CakSNP1707     | <i>Kabuli</i>    | <i>Ca_Kabuli_Chr01</i>       | 26922011                       | (T/G)       |
| 1708        | CakSNP1708     | <i>Kabuli</i>    | <i>Ca_Kabuli_Chr01</i>       | 26922631                       | (C/T)       |
| 1709        | CakSNP1709     | <i>Kabuli</i>    | <i>Ca_Kabuli_Chr01</i>       | 26953535                       | (C/T)       |
| 1710        | CakSNP1710     | <i>Kabuli</i>    | <i>Ca_Kabuli_Chr01</i>       | 27012495                       | (C/T)       |
| 1711        | CakSNP1711     | <i>Kabuli</i>    | <i>Ca_Kabuli_Chr01</i>       | 27012660                       | (G/C)       |
| 1712        | CakSNP1712     | <i>Kabuli</i>    | <i>Ca_Kabuli_Chr01</i>       | 27014895                       | (T/G)       |
| 1713        | CakSNP1713     | <i>Kabuli</i>    | <i>Ca_Kabuli_Chr01</i>       | 27014981                       | (A/G)       |
| 1714        | CakSNP1714     | <i>Kabuli</i>    | <i>Ca_Kabuli_Chr01</i>       | 27014951                       | (A/C)       |

| <b>S.N.</b> | <b>SNP IDs</b> | <b>Cultivars</b> | <b>Chromosomes/scaffolds</b> | <b>Physical positions (bp)</b> | <b>SNPs</b> |
|-------------|----------------|------------------|------------------------------|--------------------------------|-------------|
| 1715        | CakSNP1715     | <i>Kabuli</i>    | <i>Ca_Kabuli_Chr01</i>       | 27016101                       | (G/A)       |
| 1716        | CakSNP1716     | <i>Kabuli</i>    | <i>Ca_Kabuli_Chr01</i>       | 27016206                       | (T/A)       |
| 1717        | CakSNP1717     | <i>Kabuli</i>    | <i>Ca_Kabuli_Chr01</i>       | 27017559                       | (G/A)       |
| 1718        | CakSNP1718     | <i>Kabuli</i>    | <i>Ca_Kabuli_Chr01</i>       | 27017560                       | (G/A)       |
| 1719        | CakSNP1719     | <i>Kabuli</i>    | <i>Ca_Kabuli_Chr01</i>       | 27017570                       | (A/G)       |
| 1720        | CakSNP1720     | <i>Kabuli</i>    | <i>Ca_Kabuli_Chr01</i>       | 27017604                       | (T/G)       |
| 1721        | CakSNP1721     | <i>Kabuli</i>    | <i>Ca_Kabuli_Chr01</i>       | 27017606                       | (C/T)       |
| 1722        | CakSNP1722     | <i>Kabuli</i>    | <i>Ca_Kabuli_Chr01</i>       | 27017617                       | (G/A)       |
| 1723        | CakSNP1723     | <i>Kabuli</i>    | <i>Ca_Kabuli_Chr01</i>       | 27017626                       | (A/C)       |
| 1724        | CakSNP1724     | <i>Kabuli</i>    | <i>Ca_Kabuli_Chr01</i>       | 27017628                       | (C/A)       |
| 1725        | CakSNP1725     | <i>Kabuli</i>    | <i>Ca_Kabuli_Chr01</i>       | 27017734                       | (T/C)       |
| 1726        | CakSNP1726     | <i>Kabuli</i>    | <i>Ca_Kabuli_Chr01</i>       | 27017765                       | (A/T)       |
| 1727        | CakSNP1727     | <i>Kabuli</i>    | <i>Ca_Kabuli_Chr01</i>       | 27017771                       | (G/A)       |
| 1728        | CakSNP1728     | <i>Kabuli</i>    | <i>Ca_Kabuli_Chr01</i>       | 27020193                       | (T/C)       |
| 1729        | CakSNP1729     | <i>Kabuli</i>    | <i>Ca_Kabuli_Chr01</i>       | 27020354                       | (C/A)       |
| 1730        | CakSNP1730     | <i>Kabuli</i>    | <i>Ca_Kabuli_Chr01</i>       | 28088501                       | (T/C)       |
| 1731        | CakSNP1731     | <i>Kabuli</i>    | <i>Ca_Kabuli_Chr01</i>       | 28106756                       | (G/A)       |
| 1732        | CakSNP1732     | <i>Kabuli</i>    | <i>Ca_Kabuli_Chr01</i>       | 28133847                       | (A/G)       |
| 1733        | CakSNP1733     | <i>Kabuli</i>    | <i>Ca_Kabuli_Chr01</i>       | 28133830                       | (A/T)       |
| 1734        | CakSNP1734     | <i>Kabuli</i>    | <i>Ca_Kabuli_Chr01</i>       | 28133814                       | (C/T)       |
| 1735        | CakSNP1735     | <i>Kabuli</i>    | <i>Ca_Kabuli_Chr01</i>       | 28143955                       | (G/A)       |
| 1736        | CakSNP1736     | <i>Kabuli</i>    | <i>Ca_Kabuli_Chr01</i>       | 28152260                       | (A/G)       |
| 1737        | CakSNP1737     | <i>Kabuli</i>    | <i>Ca_Kabuli_Chr01</i>       | 28656197                       | (C/A)       |
| 1738        | CakSNP1738     | <i>Kabuli</i>    | <i>Ca_Kabuli_Chr01</i>       | 28832810                       | (C/A)       |
| 1739        | CakSNP1739     | <i>Kabuli</i>    | <i>Ca_Kabuli_Chr01</i>       | 28907617                       | (G/A)       |
| 1740        | CakSNP1740     | <i>Kabuli</i>    | <i>Ca_Kabuli_Chr01</i>       | 28909059                       | (T/A)       |
| 1741        | CakSNP1741     | <i>Kabuli</i>    | <i>Ca_Kabuli_Chr01</i>       | 29020220                       | (T/G)       |
| 1742        | CakSNP1742     | <i>Kabuli</i>    | <i>Ca_Kabuli_Chr01</i>       | 29116430                       | (T/C)       |
| 1743        | CakSNP1743     | <i>Kabuli</i>    | <i>Ca_Kabuli_Chr01</i>       | 29460440                       | (C/A)       |
| 1744        | CakSNP1744     | <i>Kabuli</i>    | <i>Ca_Kabuli_Chr01</i>       | 29634320                       | (G/T)       |
| 1745        | CakSNP1745     | <i>Kabuli</i>    | <i>Ca_Kabuli_Chr01</i>       | 29637509                       | (A/C)       |
| 1746        | CakSNP1746     | <i>Kabuli</i>    | <i>Ca_Kabuli_Chr01</i>       | 29637526                       | (C/T)       |
| 1747        | CakSNP1747     | <i>Kabuli</i>    | <i>Ca_Kabuli_Chr01</i>       | 29637572                       | (T/G)       |
| 1748        | CakSNP1748     | <i>Kabuli</i>    | <i>Ca_Kabuli_Chr01</i>       | 29637571                       | (T/G)       |
| 1749        | CakSNP1749     | <i>Kabuli</i>    | <i>Ca_Kabuli_Chr01</i>       | 30262124                       | (A/G)       |
| 1750        | CakSNP1750     | <i>Kabuli</i>    | <i>Ca_Kabuli_Chr01</i>       | 31080673                       | (T/G)       |
| 1751        | CakSNP1751     | <i>Kabuli</i>    | <i>Ca_Kabuli_Chr01</i>       | 31080792                       | (T/C)       |
| 1752        | CakSNP1752     | <i>Kabuli</i>    | <i>Ca_Kabuli_Chr01</i>       | 31240370                       | (A/G)       |
| 1753        | CakSNP1753     | <i>Kabuli</i>    | <i>Ca_Kabuli_Chr01</i>       | 31359861                       | (C/A)       |

| <b>S.N.</b> | <b>SNP IDs</b> | <b>Cultivars</b> | <b>Chromosomes/scaffolds</b> | <b>Physical positions (bp)</b> | <b>SNPs</b> |
|-------------|----------------|------------------|------------------------------|--------------------------------|-------------|
| 1754        | CakSNP1754     | <i>Kabuli</i>    | <i>Ca_Kabuli_Chr01</i>       | 31369599                       | (T/C)       |
| 1755        | CakSNP1755     | <i>Kabuli</i>    | <i>Ca_Kabuli_Chr01</i>       | 31590263                       | (C/G)       |
| 1756        | CakSNP1756     | <i>Kabuli</i>    | <i>Ca_Kabuli_Chr01</i>       | 31590510                       | (G/A)       |
| 1757        | CakSNP1757     | <i>Kabuli</i>    | <i>Ca_Kabuli_Chr01</i>       | 31590548                       | (C/T)       |
| 1758        | CakSNP1758     | <i>Kabuli</i>    | <i>Ca_Kabuli_Chr01</i>       | 31838239                       | (G/A)       |
| 1759        | CakSNP1759     | <i>Kabuli</i>    | <i>Ca_Kabuli_Chr01</i>       | 32286538                       | (C/T)       |
| 1760        | CakSNP1760     | <i>Kabuli</i>    | <i>Ca_Kabuli_Chr01</i>       | 32286534                       | (G/C)       |
| 1761        | CakSNP1761     | <i>Kabuli</i>    | <i>Ca_Kabuli_Chr01</i>       | 32286518                       | (C/A)       |
| 1762        | CakSNP1762     | <i>Kabuli</i>    | <i>Ca_Kabuli_Chr01</i>       | 32286517                       | (G/A)       |
| 1763        | CakSNP1763     | <i>Kabuli</i>    | <i>Ca_Kabuli_Chr01</i>       | 32286469                       | (G/A)       |
| 1764        | CakSNP1764     | <i>Kabuli</i>    | <i>Ca_Kabuli_Chr01</i>       | 32286466                       | (A/G)       |
| 1765        | CakSNP1765     | <i>Kabuli</i>    | <i>Ca_Kabuli_Chr01</i>       | 32286568                       | (A/C)       |
| 1766        | CakSNP1766     | <i>Kabuli</i>    | <i>Ca_Kabuli_Chr01</i>       | 32286558                       | (A/G)       |
| 1767        | CakSNP1767     | <i>Kabuli</i>    | <i>Ca_Kabuli_Chr01</i>       | 32286550                       | (G/A)       |
| 1768        | CakSNP1768     | <i>Kabuli</i>    | <i>Ca_Kabuli_Chr01</i>       | 32286536                       | (G/A)       |
| 1769        | CakSNP1769     | <i>Kabuli</i>    | <i>Ca_Kabuli_Chr01</i>       | 32286551                       | (C/T)       |
| 1770        | CakSNP1770     | <i>Kabuli</i>    | <i>Ca_Kabuli_Chr01</i>       | 32286567                       | (C/T)       |
| 1771        | CakSNP1771     | <i>Kabuli</i>    | <i>Ca_Kabuli_Chr01</i>       | 32467929                       | (G/A)       |
| 1772        | CakSNP1772     | <i>Kabuli</i>    | <i>Ca_Kabuli_Chr01</i>       | 32467954                       | (A/C)       |
| 1773        | CakSNP1773     | <i>Kabuli</i>    | <i>Ca_Kabuli_Chr01</i>       | 32468053                       | (A/C)       |
| 1774        | CakSNP1774     | <i>Kabuli</i>    | <i>Ca_Kabuli_Chr01</i>       | 32468080                       | (A/T)       |
| 1775        | CakSNP1775     | <i>Kabuli</i>    | <i>Ca_Kabuli_Chr01</i>       | 32468105                       | (C/G)       |
| 1776        | CakSNP1776     | <i>Kabuli</i>    | <i>Ca_Kabuli_Chr01</i>       | 32468116                       | (A/G)       |
| 1777        | CakSNP1777     | <i>Kabuli</i>    | <i>Ca_Kabuli_Chr01</i>       | 32468119                       | (T/C)       |
| 1778        | CakSNP1778     | <i>Kabuli</i>    | <i>Ca_Kabuli_Chr01</i>       | 33058743                       | (T/C)       |
| 1779        | CakSNP1779     | <i>Kabuli</i>    | <i>Ca_Kabuli_Chr01</i>       | 33063207                       | (C/T)       |
| 1780        | CakSNP1780     | <i>Kabuli</i>    | <i>Ca_Kabuli_Chr01</i>       | 33194600                       | (T/C)       |
| 1781        | CakSNP1781     | <i>Kabuli</i>    | <i>Ca_Kabuli_Chr01</i>       | 33804152                       | (C/T)       |
| 1782        | CakSNP1782     | <i>Kabuli</i>    | <i>Ca_Kabuli_Chr01</i>       | 33804153                       | (C/T)       |
| 1783        | CakSNP1783     | <i>Kabuli</i>    | <i>Ca_Kabuli_Chr01</i>       | 33804189                       | (C/T)       |
| 1784        | CakSNP1784     | <i>Kabuli</i>    | <i>Ca_Kabuli_Chr01</i>       | 33804201                       | (C/T)       |
| 1785        | CakSNP1785     | <i>Kabuli</i>    | <i>Ca_Kabuli_Chr01</i>       | 33804232                       | (T/G)       |
| 1786        | CakSNP1786     | <i>Kabuli</i>    | <i>Ca_Kabuli_Chr01</i>       | 33804247                       | (A/G)       |
| 1787        | CakSNP1787     | <i>Kabuli</i>    | <i>Ca_Kabuli_Chr01</i>       | 33804262                       | (C/G)       |
| 1788        | CakSNP1788     | <i>Kabuli</i>    | <i>Ca_Kabuli_Chr01</i>       | 34161921                       | (G/A)       |
| 1789        | CakSNP1789     | <i>Kabuli</i>    | <i>Ca_Kabuli_Chr01</i>       | 34261166                       | (C/A)       |
| 1790        | CakSNP1790     | <i>Kabuli</i>    | <i>Ca_Kabuli_Chr01</i>       | 34261158                       | (C/A)       |
| 1791        | CakSNP1791     | <i>Kabuli</i>    | <i>Ca_Kabuli_Chr01</i>       | 34311145                       | (T/G)       |
| 1792        | CakSNP1792     | <i>Kabuli</i>    | <i>Ca_Kabuli_Chr01</i>       | 34437114                       | (C/T)       |

| <b>S.N.</b> | <b>SNP IDs</b> | <b>Cultivars</b> | <b>Chromosomes/scaffolds</b> | <b>Physical positions (bp)</b> | <b>SNPs</b> |
|-------------|----------------|------------------|------------------------------|--------------------------------|-------------|
| 1793        | CakSNP1793     | <i>Kabuli</i>    | <i>Ca_Kabuli_Chr01</i>       | 34727251                       | (T/G)       |
| 1794        | CakSNP1794     | <i>Kabuli</i>    | <i>Ca_Kabuli_Chr01</i>       | 34772813                       | (T/A)       |
| 1795        | CakSNP1795     | <i>Kabuli</i>    | <i>Ca_Kabuli_Chr01</i>       | 34866709                       | (C/A)       |
| 1796        | CakSNP1796     | <i>Kabuli</i>    | <i>Ca_Kabuli_Chr01</i>       | 34905580                       | (A/G)       |
| 1797        | CakSNP1797     | <i>Kabuli</i>    | <i>Ca_Kabuli_Chr01</i>       | 34911065                       | (T/A)       |
| 1798        | CakSNP1798     | <i>Kabuli</i>    | <i>Ca_Kabuli_Chr01</i>       | 34948934                       | (A/G)       |
| 1799        | CakSNP1799     | <i>Kabuli</i>    | <i>Ca_Kabuli_Chr01</i>       | 35041241                       | (T/G)       |
| 1800        | CakSNP1800     | <i>Kabuli</i>    | <i>Ca_Kabuli_Chr01</i>       | 35041324                       | (G/T)       |
| 1801        | CakSNP1801     | <i>Kabuli</i>    | <i>Ca_Kabuli_Chr01</i>       | 35313277                       | (A/G)       |
| 1802        | CakSNP1802     | <i>Kabuli</i>    | <i>Ca_Kabuli_Chr01</i>       | 35315381                       | (T/A)       |
| 1803        | CakSNP1803     | <i>Kabuli</i>    | <i>Ca_Kabuli_Chr01</i>       | 35315379                       | (A/T)       |
| 1804        | CakSNP1804     | <i>Kabuli</i>    | <i>Ca_Kabuli_Chr01</i>       | 35315347                       | (C/T)       |
| 1805        | CakSNP1805     | <i>Kabuli</i>    | <i>Ca_Kabuli_Chr01</i>       | 35315327                       | (T/A)       |
| 1806        | CakSNP1806     | <i>Kabuli</i>    | <i>Ca_Kabuli_Chr01</i>       | 35315436                       | (G/A)       |
| 1807        | CakSNP1807     | <i>Kabuli</i>    | <i>Ca_Kabuli_Chr01</i>       | 35708841                       | (C/T)       |
| 1808        | CakSNP1808     | <i>Kabuli</i>    | <i>Ca_Kabuli_Chr01</i>       | 36126090                       | (C/T)       |
| 1809        | CakSNP1809     | <i>Kabuli</i>    | <i>Ca_Kabuli_Chr01</i>       | 36794731                       | (A/G)       |
| 1810        | CakSNP1810     | <i>Kabuli</i>    | <i>Ca_Kabuli_Chr01</i>       | 36794797                       | (G/A)       |
| 1811        | CakSNP1811     | <i>Kabuli</i>    | <i>Ca_Kabuli_Chr01</i>       | 36794800                       | (G/T)       |
| 1812        | CakSNP1812     | <i>Kabuli</i>    | <i>Ca_Kabuli_Chr01</i>       | 36794806                       | (G/T)       |
| 1813        | CakSNP1813     | <i>Kabuli</i>    | <i>Ca_Kabuli_Chr01</i>       | 36794813                       | (C/T)       |
| 1814        | CakSNP1814     | <i>Kabuli</i>    | <i>Ca_Kabuli_Chr01</i>       | 36794887                       | (G/A)       |
| 1815        | CakSNP1815     | <i>Kabuli</i>    | <i>Ca_Kabuli_Chr01</i>       | 36794870                       | (C/T)       |
| 1816        | CakSNP1816     | <i>Kabuli</i>    | <i>Ca_Kabuli_Chr01</i>       | 36794900                       | (C/T)       |
| 1817        | CakSNP1817     | <i>Kabuli</i>    | <i>Ca_Kabuli_Chr01</i>       | 36794906                       | (A/C)       |
| 1818        | CakSNP1818     | <i>Kabuli</i>    | <i>Ca_Kabuli_Chr01</i>       | 36794912                       | (G/T)       |
| 1819        | CakSNP1819     | <i>Kabuli</i>    | <i>Ca_Kabuli_Chr01</i>       | 36794913                       | (A/T)       |
| 1820        | CakSNP1820     | <i>Kabuli</i>    | <i>Ca_Kabuli_Chr01</i>       | 36794915                       | (G/A)       |
| 1821        | CakSNP1821     | <i>Kabuli</i>    | <i>Ca_Kabuli_Chr01</i>       | 36892533                       | (C/T)       |
| 1822        | CakSNP1822     | <i>Kabuli</i>    | <i>Ca_Kabuli_Chr01</i>       | 37026302                       | (C/T)       |
| 1823        | CakSNP1823     | <i>Kabuli</i>    | <i>Ca_Kabuli_Chr01</i>       | 37608030                       | (G/A)       |
| 1824        | CakSNP1824     | <i>Kabuli</i>    | <i>Ca_Kabuli_Chr01</i>       | 37608050                       | (T/G)       |
| 1825        | CakSNP1825     | <i>Kabuli</i>    | <i>Ca_Kabuli_Chr01</i>       | 37642546                       | (G/A)       |
| 1826        | CakSNP1826     | <i>Kabuli</i>    | <i>Ca_Kabuli_Chr01</i>       | 37643213                       | (T/C)       |
| 1827        | CakSNP1827     | <i>Kabuli</i>    | <i>Ca_Kabuli_Chr01</i>       | 37647602                       | (C/G)       |
| 1828        | CakSNP1828     | <i>Kabuli</i>    | <i>Ca_Kabuli_Chr01</i>       | 37651679                       | (G/A)       |
| 1829        | CakSNP1829     | <i>Kabuli</i>    | <i>Ca_Kabuli_Chr01</i>       | 37651695                       | (G/A)       |
| 1830        | CakSNP1830     | <i>Kabuli</i>    | <i>Ca_Kabuli_Chr01</i>       | 37651764                       | (A/C)       |
| 1831        | CakSNP1831     | <i>Kabuli</i>    | <i>Ca_Kabuli_Chr01</i>       | 37651711                       | (G/T)       |



| <b>S.N.</b> | <b>SNP IDs</b> | <b>Cultivars</b> | <b>Chromosomes/scaffolds</b> | <b>Physical positions (bp)</b> | <b>SNPs</b> |
|-------------|----------------|------------------|------------------------------|--------------------------------|-------------|
| 1832        | CakSNP1832     | <i>Kabuli</i>    | <i>Ca_Kabuli_Chr01</i>       | 37651800                       | (T/A)       |
| 1833        | CakSNP1833     | <i>Kabuli</i>    | <i>Ca_Kabuli_Chr01</i>       | 37651823                       | (A/G)       |
| 1834        | CakSNP1834     | <i>Kabuli</i>    | <i>Ca_Kabuli_Chr01</i>       | 37651827                       | (C/T)       |
| 1835        | CakSNP1835     | <i>Kabuli</i>    | <i>Ca_Kabuli_Chr01</i>       | 37651843                       | (T/C)       |
| 1836        | CakSNP1836     | <i>Kabuli</i>    | <i>Ca_Kabuli_Chr01</i>       | 37654039                       | (C/G)       |
| 1837        | CakSNP1837     | <i>Kabuli</i>    | <i>Ca_Kabuli_Chr01</i>       | 37654136                       | (C/G)       |
| 1838        | CakSNP1838     | <i>Kabuli</i>    | <i>Ca_Kabuli_Chr01</i>       | 37654926                       | (C/T)       |
| 1839        | CakSNP1839     | <i>Kabuli</i>    | <i>Ca_Kabuli_Chr01</i>       | 37690416                       | (G/A)       |
| 1840        | CakSNP1840     | <i>Kabuli</i>    | <i>Ca_Kabuli_Chr01</i>       | 37690465                       | (T/C)       |
| 1841        | CakSNP1841     | <i>Kabuli</i>    | <i>Ca_Kabuli_Chr01</i>       | 37690498                       | (C/A)       |
| 1842        | CakSNP1842     | <i>Kabuli</i>    | <i>Ca_Kabuli_Chr01</i>       | 37690497                       | (A/T)       |
| 1843        | CakSNP1843     | <i>Kabuli</i>    | <i>Ca_Kabuli_Chr01</i>       | 37699039                       | (T/G)       |
| 1844        | CakSNP1844     | <i>Kabuli</i>    | <i>Ca_Kabuli_Chr01</i>       | 37699036                       | (T/C)       |
| 1845        | CakSNP1845     | <i>Kabuli</i>    | <i>Ca_Kabuli_Chr01</i>       | 37722095                       | (G/A)       |
| 1846        | CakSNP1846     | <i>Kabuli</i>    | <i>Ca_Kabuli_Chr01</i>       | 37722143                       | (G/C)       |
| 1847        | CakSNP1847     | <i>Kabuli</i>    | <i>Ca_Kabuli_Chr01</i>       | 37768179                       | (T/A)       |
| 1848        | CakSNP1848     | <i>Kabuli</i>    | <i>Ca_Kabuli_Chr01</i>       | 37768206                       | (A/T)       |
| 1849        | CakSNP1849     | <i>Kabuli</i>    | <i>Ca_Kabuli_Chr01</i>       | 37768238                       | (A/G)       |
| 1850        | CakSNP1850     | <i>Kabuli</i>    | <i>Ca_Kabuli_Chr01</i>       | 37768333                       | (C/T)       |
| 1851        | CakSNP1851     | <i>Kabuli</i>    | <i>Ca_Kabuli_Chr01</i>       | 37768299                       | (A/G)       |
| 1852        | CakSNP1852     | <i>Kabuli</i>    | <i>Ca_Kabuli_Chr01</i>       | 37768276                       | (G/C)       |
| 1853        | CakSNP1853     | <i>Kabuli</i>    | <i>Ca_Kabuli_Chr01</i>       | 37768264                       | (A/G)       |
| 1854        | CakSNP1854     | <i>Kabuli</i>    | <i>Ca_Kabuli_Chr01</i>       | 37862342                       | (T/G)       |
| 1855        | CakSNP1855     | <i>Kabuli</i>    | <i>Ca_Kabuli_Chr01</i>       | 37880995                       | (T/C)       |
| 1856        | CakSNP1856     | <i>Kabuli</i>    | <i>Ca_Kabuli_Chr01</i>       | 37892088                       | (A/C)       |
| 1857        | CakSNP1857     | <i>Kabuli</i>    | <i>Ca_Kabuli_Chr01</i>       | 37892089                       | (C/T)       |
| 1858        | CakSNP1858     | <i>Kabuli</i>    | <i>Ca_Kabuli_Chr01</i>       | 37892095                       | (A/G)       |
| 1859        | CakSNP1859     | <i>Kabuli</i>    | <i>Ca_Kabuli_Chr01</i>       | 37892139                       | (A/T)       |
| 1860        | CakSNP1860     | <i>Kabuli</i>    | <i>Ca_Kabuli_Chr01</i>       | 38049721                       | (C/T)       |
| 1861        | CakSNP1861     | <i>Kabuli</i>    | <i>Ca_Kabuli_Chr01</i>       | 38678712                       | (T/C)       |
| 1862        | CakSNP1862     | <i>Kabuli</i>    | <i>Ca_Kabuli_Chr01</i>       | 38877670                       | (T/C)       |
| 1863        | CakSNP1863     | <i>Kabuli</i>    | <i>Ca_Kabuli_Chr01</i>       | 38877692                       | (G/T)       |
| 1864        | CakSNP1864     | <i>Kabuli</i>    | <i>Ca_Kabuli_Chr01</i>       | 39436291                       | (T/C)       |
| 1865        | CakSNP1865     | <i>Kabuli</i>    | <i>Ca_Kabuli_Chr01</i>       | 39601982                       | (T/G)       |
| 1866        | CakSNP1866     | <i>Kabuli</i>    | <i>Ca_Kabuli_Chr01</i>       | 39602029                       | (G/T)       |
| 1867        | CakSNP1867     | <i>Kabuli</i>    | <i>Ca_Kabuli_Chr01</i>       | 39616139                       | (A/C)       |
| 1868        | CakSNP1868     | <i>Kabuli</i>    | <i>Ca_Kabuli_Chr01</i>       | 39663432                       | (C/G)       |
| 1869        | CakSNP1869     | <i>Kabuli</i>    | <i>Ca_Kabuli_Chr01</i>       | 40224835                       | (T/A)       |
| 1870        | CakSNP1870     | <i>Kabuli</i>    | <i>Ca_Kabuli_Chr01</i>       | 40224834                       | (C/G)       |

| <b>S.N.</b> | <b>SNP IDs</b> | <b>Cultivars</b> | <b>Chromosomes/scaffolds</b> | <b>Physical positions (bp)</b> | <b>SNPs</b> |
|-------------|----------------|------------------|------------------------------|--------------------------------|-------------|
| 1871        | CakSNP1871     | <i>Kabuli</i>    | <i>Ca_Kabuli_Chr01</i>       | 40224804                       | (A/G)       |
| 1872        | CakSNP1872     | <i>Kabuli</i>    | <i>Ca_Kabuli_Chr01</i>       | 40343216                       | (G/T)       |
| 1873        | CakSNP1873     | <i>Kabuli</i>    | <i>Ca_Kabuli_Chr01</i>       | 40346280                       | (A/C)       |
| 1874        | CakSNP1874     | <i>Kabuli</i>    | <i>Ca_Kabuli_Chr01</i>       | 40358693                       | (C/T)       |
| 1875        | CakSNP1875     | <i>Kabuli</i>    | <i>Ca_Kabuli_Chr01</i>       | 40358747                       | (T/G)       |
| 1876        | CakSNP1876     | <i>Kabuli</i>    | <i>Ca_Kabuli_Chr01</i>       | 40367940                       | (G/A)       |
| 1877        | CakSNP1877     | <i>Kabuli</i>    | <i>Ca_Kabuli_Chr01</i>       | 40368845                       | (C/T)       |
| 1878        | CakSNP1878     | <i>Kabuli</i>    | <i>Ca_Kabuli_Chr01</i>       | 40502077                       | (T/C)       |
| 1879        | CakSNP1879     | <i>Kabuli</i>    | <i>Ca_Kabuli_Chr01</i>       | 40570811                       | (G/T)       |
| 1880        | CakSNP1880     | <i>Kabuli</i>    | <i>Ca_Kabuli_Chr01</i>       | 40585026                       | (T/C)       |
| 1881        | CakSNP1881     | <i>Kabuli</i>    | <i>Ca_Kabuli_Chr01</i>       | 40630215                       | (C/T)       |
| 1882        | CakSNP1882     | <i>Kabuli</i>    | <i>Ca_Kabuli_Chr01</i>       | 40630213                       | (G/T)       |
| 1883        | CakSNP1883     | <i>Kabuli</i>    | <i>Ca_Kabuli_Chr01</i>       | 40630158                       | (T/A)       |
| 1884        | CakSNP1884     | <i>Kabuli</i>    | <i>Ca_Kabuli_Chr01</i>       | 40660069                       | (T/G)       |
| 1885        | CakSNP1885     | <i>Kabuli</i>    | <i>Ca_Kabuli_Chr01</i>       | 40660116                       | (G/A)       |
| 1886        | CakSNP1886     | <i>Kabuli</i>    | <i>Ca_Kabuli_Chr01</i>       | 40745421                       | (G/T)       |
| 1887        | CakSNP1887     | <i>Kabuli</i>    | <i>Ca_Kabuli_Chr01</i>       | 40745452                       | (T/C)       |
| 1888        | CakSNP1888     | <i>Kabuli</i>    | <i>Ca_Kabuli_Chr01</i>       | 40745492                       | (A/G)       |
| 1889        | CakSNP1889     | <i>Kabuli</i>    | <i>Ca_Kabuli_Chr01</i>       | 40745846                       | (T/C)       |
| 1890        | CakSNP1890     | <i>Kabuli</i>    | <i>Ca_Kabuli_Chr01</i>       | 41029732                       | (C/T)       |
| 1891        | CakSNP1891     | <i>Kabuli</i>    | <i>Ca_Kabuli_Chr01</i>       | 41065797                       | (G/C)       |
| 1892        | CakSNP1892     | <i>Kabuli</i>    | <i>Ca_Kabuli_Chr01</i>       | 41125493                       | (T/C)       |
| 1893        | CakSNP1893     | <i>Kabuli</i>    | <i>Ca_Kabuli_Chr01</i>       | 41169218                       | (G/T)       |
| 1894        | CakSNP1894     | <i>Kabuli</i>    | <i>Ca_Kabuli_Chr01</i>       | 41169430                       | (T/G)       |
| 1895        | CakSNP1895     | <i>Kabuli</i>    | <i>Ca_Kabuli_Chr01</i>       | 41169372                       | (T/A)       |
| 1896        | CakSNP1896     | <i>Kabuli</i>    | <i>Ca_Kabuli_Chr01</i>       | 41178168                       | (G/A)       |
| 1897        | CakSNP1897     | <i>Kabuli</i>    | <i>Ca_Kabuli_Chr01</i>       | 41178183                       | (C/A)       |
| 1898        | CakSNP1898     | <i>Kabuli</i>    | <i>Ca_Kabuli_Chr01</i>       | 41179660                       | (G/T)       |
| 1899        | CakSNP1899     | <i>Kabuli</i>    | <i>Ca_Kabuli_Chr01</i>       | 41179650                       | (A/T)       |
| 1900        | CakSNP1900     | <i>Kabuli</i>    | <i>Ca_Kabuli_Chr01</i>       | 41185512                       | (T/G)       |
| 1901        | CakSNP1901     | <i>Kabuli</i>    | <i>Ca_Kabuli_Chr01</i>       | 41202173                       | (T/G)       |
| 1902        | CakSNP1902     | <i>Kabuli</i>    | <i>Ca_Kabuli_Chr01</i>       | 41202206                       | (A/G)       |
| 1903        | CakSNP1903     | <i>Kabuli</i>    | <i>Ca_Kabuli_Chr01</i>       | 41310401                       | (T/G)       |
| 1904        | CakSNP1904     | <i>Kabuli</i>    | <i>Ca_Kabuli_Chr01</i>       | 41339408                       | (T/A)       |
| 1905        | CakSNP1905     | <i>Kabuli</i>    | <i>Ca_Kabuli_Chr01</i>       | 41339445                       | (C/A)       |
| 1906        | CakSNP1906     | <i>Kabuli</i>    | <i>Ca_Kabuli_Chr01</i>       | 41380061                       | (G/T)       |
| 1907        | CakSNP1907     | <i>Kabuli</i>    | <i>Ca_Kabuli_Chr01</i>       | 41437222                       | (A/G)       |
| 1908        | CakSNP1908     | <i>Kabuli</i>    | <i>Ca_Kabuli_Chr01</i>       | 41437366                       | (T/C)       |
| 1909        | CakSNP1909     | <i>Kabuli</i>    | <i>Ca_Kabuli_Chr01</i>       | 41437453                       | (T/G)       |

| <b>S.N.</b> | <b>SNP IDs</b> | <b>Cultivars</b> | <b>Chromosomes/scaffolds</b> | <b>Physical positions (bp)</b> | <b>SNPs</b> |
|-------------|----------------|------------------|------------------------------|--------------------------------|-------------|
| 1910        | CakSNP1910     | <i>Kabuli</i>    | <i>Ca_Kabuli_Chr01</i>       | 41437483                       | (G/A)       |
| 1911        | CakSNP1911     | <i>Kabuli</i>    | <i>Ca_Kabuli_Chr01</i>       | 41439539                       | (A/G)       |
| 1912        | CakSNP1912     | <i>Kabuli</i>    | <i>Ca_Kabuli_Chr01</i>       | 41439593                       | (A/G)       |
| 1913        | CakSNP1913     | <i>Kabuli</i>    | <i>Ca_Kabuli_Chr01</i>       | 41451910                       | (C/T)       |
| 1914        | CakSNP1914     | <i>Kabuli</i>    | <i>Ca_Kabuli_Chr01</i>       | 41451977                       | (C/T)       |
| 1915        | CakSNP1915     | <i>Kabuli</i>    | <i>Ca_Kabuli_Chr01</i>       | 41475442                       | (T/C)       |
| 1916        | CakSNP1916     | <i>Kabuli</i>    | <i>Ca_Kabuli_Chr01</i>       | 41484033                       | (T/C)       |
| 1917        | CakSNP1917     | <i>Kabuli</i>    | <i>Ca_Kabuli_Chr01</i>       | 41484085                       | (C/T)       |
| 1918        | CakSNP1918     | <i>Kabuli</i>    | <i>Ca_Kabuli_Chr01</i>       | 41564809                       | (T/C)       |
| 1919        | CakSNP1919     | <i>Kabuli</i>    | <i>Ca_Kabuli_Chr01</i>       | 41795343                       | (G/A)       |
| 1920        | CakSNP1920     | <i>Kabuli</i>    | <i>Ca_Kabuli_Chr01</i>       | 41795367                       | (C/T)       |
| 1921        | CakSNP1921     | <i>Kabuli</i>    | <i>Ca_Kabuli_Chr01</i>       | 41822419                       | (C/T)       |
| 1922        | CakSNP1922     | <i>Kabuli</i>    | <i>Ca_Kabuli_Chr01</i>       | 41827388                       | (T/C)       |
| 1923        | CakSNP1923     | <i>Kabuli</i>    | <i>Ca_Kabuli_Chr01</i>       | 41867035                       | (C/T)       |
| 1924        | CakSNP1924     | <i>Kabuli</i>    | <i>Ca_Kabuli_Chr01</i>       | 41897216                       | (C/A)       |
| 1925        | CakSNP1925     | <i>Kabuli</i>    | <i>Ca_Kabuli_Chr01</i>       | 41946005                       | (A/G)       |
| 1926        | CakSNP1926     | <i>Kabuli</i>    | <i>Ca_Kabuli_Chr01</i>       | 41981244                       | (G/A)       |
| 1927        | CakSNP1927     | <i>Kabuli</i>    | <i>Ca_Kabuli_Chr01</i>       | 41981259                       | (G/A)       |
| 1928        | CakSNP1928     | <i>Kabuli</i>    | <i>Ca_Kabuli_Chr01</i>       | 42189380                       | (A/G)       |
| 1929        | CakSNP1929     | <i>Kabuli</i>    | <i>Ca_Kabuli_Chr01</i>       | 42452801                       | (G/A)       |
| 1930        | CakSNP1930     | <i>Kabuli</i>    | <i>Ca_Kabuli_Chr01</i>       | 42452939                       | (G/T)       |
| 1931        | CakSNP1931     | <i>Kabuli</i>    | <i>Ca_Kabuli_Chr01</i>       | 42515406                       | (C/T)       |
| 1932        | CakSNP1932     | <i>Kabuli</i>    | <i>Ca_Kabuli_Chr01</i>       | 42551574                       | (T/G)       |
| 1933        | CakSNP1933     | <i>Kabuli</i>    | <i>Ca_Kabuli_Chr01</i>       | 42551585                       | (C/A)       |
| 1934        | CakSNP1934     | <i>Kabuli</i>    | <i>Ca_Kabuli_Chr01</i>       | 42552658                       | (A/C)       |
| 1935        | CakSNP1935     | <i>Kabuli</i>    | <i>Ca_Kabuli_Chr01</i>       | 42605239                       | (T/G)       |
| 1936        | CakSNP1936     | <i>Kabuli</i>    | <i>Ca_Kabuli_Chr01</i>       | 42610115                       | (A/C)       |
| 1937        | CakSNP1937     | <i>Kabuli</i>    | <i>Ca_Kabuli_Chr01</i>       | 42613060                       | (T/G)       |
| 1938        | CakSNP1938     | <i>Kabuli</i>    | <i>Ca_Kabuli_Chr01</i>       | 42894518                       | (T/C)       |
| 1939        | CakSNP1939     | <i>Kabuli</i>    | <i>Ca_Kabuli_Chr01</i>       | 42894525                       | (T/C)       |
| 1940        | CakSNP1940     | <i>Kabuli</i>    | <i>Ca_Kabuli_Chr01</i>       | 42894536                       | (G/T)       |
| 1941        | CakSNP1941     | <i>Kabuli</i>    | <i>Ca_Kabuli_Chr01</i>       | 43053424                       | (G/C)       |
| 1942        | CakSNP1942     | <i>Kabuli</i>    | <i>Ca_Kabuli_Chr01</i>       | 43273910                       | (G/T)       |
| 1943        | CakSNP1943     | <i>Kabuli</i>    | <i>Ca_Kabuli_Chr01</i>       | 43273922                       | (T/C)       |
| 1944        | CakSNP1944     | <i>Kabuli</i>    | <i>Ca_Kabuli_Chr01</i>       | 43273925                       | (A/G)       |
| 1945        | CakSNP1945     | <i>Kabuli</i>    | <i>Ca_Kabuli_Chr01</i>       | 43273931                       | (G/A)       |
| 1946        | CakSNP1946     | <i>Kabuli</i>    | <i>Ca_Kabuli_Chr01</i>       | 43273941                       | (C/G)       |
| 1947        | CakSNP1947     | <i>Kabuli</i>    | <i>Ca_Kabuli_Chr01</i>       | 43273943                       | (A/G)       |
| 1948        | CakSNP1948     | <i>Kabuli</i>    | <i>Ca_Kabuli_Chr01</i>       | 43273961                       | (C/T)       |

| <b>S.N.</b> | <b>SNP IDs</b> | <b>Cultivars</b> | <b>Chromosomes/scaffolds</b> | <b>Physical positions (bp)</b> | <b>SNPs</b> |
|-------------|----------------|------------------|------------------------------|--------------------------------|-------------|
| 1949        | CakSNP1949     | <i>Kabuli</i>    | <i>Ca_Kabuli_Chr01</i>       | 43273962                       | (A/G)       |
| 1950        | CakSNP1950     | <i>Kabuli</i>    | <i>Ca_Kabuli_Chr01</i>       | 43273968                       | (T/G)       |
| 1951        | CakSNP1951     | <i>Kabuli</i>    | <i>Ca_Kabuli_Chr01</i>       | 43273972                       | (C/T)       |
| 1952        | CakSNP1952     | <i>Kabuli</i>    | <i>Ca_Kabuli_Chr01</i>       | 43273981                       | (G/T)       |
| 1953        | CakSNP1953     | <i>Kabuli</i>    | <i>Ca_Kabuli_Chr01</i>       | 43273985                       | (G/A)       |
| 1954        | CakSNP1954     | <i>Kabuli</i>    | <i>Ca_Kabuli_Chr01</i>       | 43304584                       | (A/C)       |
| 1955        | CakSNP1955     | <i>Kabuli</i>    | <i>Ca_Kabuli_Chr01</i>       | 43304573                       | (C/T)       |
| 1956        | CakSNP1956     | <i>Kabuli</i>    | <i>Ca_Kabuli_Chr01</i>       | 43305858                       | (T/C)       |
| 1957        | CakSNP1957     | <i>Kabuli</i>    | <i>Ca_Kabuli_Chr01</i>       | 43305870                       | (G/A)       |
| 1958        | CakSNP1958     | <i>Kabuli</i>    | <i>Ca_Kabuli_Chr01</i>       | 43305886                       | (T/C)       |
| 1959        | CakSNP1959     | <i>Kabuli</i>    | <i>Ca_Kabuli_Chr01</i>       | 43305904                       | (C/A)       |
| 1960        | CakSNP1960     | <i>Kabuli</i>    | <i>Ca_Kabuli_Chr01</i>       | 43306048                       | (G/A)       |
| 1961        | CakSNP1961     | <i>Kabuli</i>    | <i>Ca_Kabuli_Chr01</i>       | 43306045                       | (C/A)       |
| 1962        | CakSNP1962     | <i>Kabuli</i>    | <i>Ca_Kabuli_Chr01</i>       | 43306036                       | (G/A)       |
| 1963        | CakSNP1963     | <i>Kabuli</i>    | <i>Ca_Kabuli_Chr01</i>       | 43306012                       | (G/A)       |
| 1964        | CakSNP1964     | <i>Kabuli</i>    | <i>Ca_Kabuli_Chr01</i>       | 43306221                       | (A/G)       |
| 1965        | CakSNP1965     | <i>Kabuli</i>    | <i>Ca_Kabuli_Chr01</i>       | 43509159                       | (A/G)       |
| 1966        | CakSNP1966     | <i>Kabuli</i>    | <i>Ca_Kabuli_Chr01</i>       | 43509409                       | (T/C)       |
| 1967        | CakSNP1967     | <i>Kabuli</i>    | <i>Ca_Kabuli_Chr01</i>       | 43576059                       | (A/G)       |
| 1968        | CakSNP1968     | <i>Kabuli</i>    | <i>Ca_Kabuli_Chr01</i>       | 43585657                       | (T/G)       |
| 1969        | CakSNP1969     | <i>Kabuli</i>    | <i>Ca_Kabuli_Chr01</i>       | 43590106                       | (C/T)       |
| 1970        | CakSNP1970     | <i>Kabuli</i>    | <i>Ca_Kabuli_Chr01</i>       | 43590258                       | (T/C)       |
| 1971        | CakSNP1971     | <i>Kabuli</i>    | <i>Ca_Kabuli_Chr01</i>       | 43724824                       | (C/T)       |
| 1972        | CakSNP1972     | <i>Kabuli</i>    | <i>Ca_Kabuli_Chr01</i>       | 43724839                       | (C/T)       |
| 1973        | CakSNP1973     | <i>Kabuli</i>    | <i>Ca_Kabuli_Chr01</i>       | 43724963                       | (C/T)       |
| 1974        | CakSNP1974     | <i>Kabuli</i>    | <i>Ca_Kabuli_Chr01</i>       | 43725059                       | (C/T)       |
| 1975        | CakSNP1975     | <i>Kabuli</i>    | <i>Ca_Kabuli_Chr01</i>       | 43725104                       | (T/C)       |
| 1976        | CakSNP1976     | <i>Kabuli</i>    | <i>Ca_Kabuli_Chr01</i>       | 43727804                       | (C/T)       |
| 1977        | CakSNP1977     | <i>Kabuli</i>    | <i>Ca_Kabuli_Chr01</i>       | 43792565                       | (G/A)       |
| 1978        | CakSNP1978     | <i>Kabuli</i>    | <i>Ca_Kabuli_Chr01</i>       | 43800367                       | (C/T)       |
| 1979        | CakSNP1979     | <i>Kabuli</i>    | <i>Ca_Kabuli_Chr01</i>       | 43930143                       | (A/T)       |
| 1980        | CakSNP1980     | <i>Kabuli</i>    | <i>Ca_Kabuli_Chr01</i>       | 43930138                       | (T/C)       |
| 1981        | CakSNP1981     | <i>Kabuli</i>    | <i>Ca_Kabuli_Chr01</i>       | 43933881                       | (G/C)       |
| 1982        | CakSNP1982     | <i>Kabuli</i>    | <i>Ca_Kabuli_Chr01</i>       | 43933904                       | (A/G)       |
| 1983        | CakSNP1983     | <i>Kabuli</i>    | <i>Ca_Kabuli_Chr01</i>       | 43934024                       | (G/T)       |
| 1984        | CakSNP1984     | <i>Kabuli</i>    | <i>Ca_Kabuli_Chr01</i>       | 43934120                       | (A/G)       |
| 1985        | CakSNP1985     | <i>Kabuli</i>    | <i>Ca_Kabuli_Chr01</i>       | 43934117                       | (G/T)       |
| 1986        | CakSNP1986     | <i>Kabuli</i>    | <i>Ca_Kabuli_Chr01</i>       | 43934081                       | (C/T)       |
| 1987        | CakSNP1987     | <i>Kabuli</i>    | <i>Ca_Kabuli_Chr01</i>       | 43943035                       | (G/T)       |

| <b>S.N.</b> | <b>SNP IDs</b> | <b>Cultivars</b> | <b>Chromosomes/scaffolds</b> | <b>Physical positions (bp)</b> | <b>SNPs</b> |
|-------------|----------------|------------------|------------------------------|--------------------------------|-------------|
| 1988        | CakSNP1988     | <i>Kabuli</i>    | <i>Ca_Kabuli_Chr01</i>       | 43954743                       | (C/G)       |
| 1989        | CakSNP1989     | <i>Kabuli</i>    | <i>Ca_Kabuli_Chr01</i>       | 44043281                       | (G/A)       |
| 1990        | CakSNP1990     | <i>Kabuli</i>    | <i>Ca_Kabuli_Chr01</i>       | 44085069                       | (C/T)       |
| 1991        | CakSNP1991     | <i>Kabuli</i>    | <i>Ca_Kabuli_Chr01</i>       | 44348947                       | (C/T)       |
| 1992        | CakSNP1992     | <i>Kabuli</i>    | <i>Ca_Kabuli_Chr01</i>       | 44349004                       | (T/C)       |
| 1993        | CakSNP1993     | <i>Kabuli</i>    | <i>Ca_Kabuli_Chr01</i>       | 44350953                       | (G/T)       |
| 1994        | CakSNP1994     | <i>Kabuli</i>    | <i>Ca_Kabuli_Chr01</i>       | 44635939                       | (T/C)       |
| 1995        | CakSNP1995     | <i>Kabuli</i>    | <i>Ca_Kabuli_Chr01</i>       | 44635926                       | (A/G)       |
| 1996        | CakSNP1996     | <i>Kabuli</i>    | <i>Ca_Kabuli_Chr01</i>       | 44635893                       | (A/G)       |
| 1997        | CakSNP1997     | <i>Kabuli</i>    | <i>Ca_Kabuli_Chr01</i>       | 44976738                       | (T/A)       |
| 1998        | CakSNP1998     | <i>Kabuli</i>    | <i>Ca_Kabuli_Chr01</i>       | 44976735                       | (C/T)       |
| 1999        | CakSNP1999     | <i>Kabuli</i>    | <i>Ca_Kabuli_Chr01</i>       | 44988344                       | (A/G)       |
| 2000        | CakSNP2000     | <i>Kabuli</i>    | <i>Ca_Kabuli_Chr01</i>       | 44988387                       | (C/A)       |
| 2001        | CakSNP2001     | <i>Kabuli</i>    | <i>Ca_Kabuli_Chr01</i>       | 45003190                       | (G/A)       |
| 2002        | CakSNP2002     | <i>Kabuli</i>    | <i>Ca_Kabuli_Chr01</i>       | 45003514                       | (G/A)       |
| 2003        | CakSNP2003     | <i>Kabuli</i>    | <i>Ca_Kabuli_Chr01</i>       | 45003509                       | (C/A)       |
| 2004        | CakSNP2004     | <i>Kabuli</i>    | <i>Ca_Kabuli_Chr01</i>       | 45003505                       | (A/C)       |
| 2005        | CakSNP2005     | <i>Kabuli</i>    | <i>Ca_Kabuli_Chr01</i>       | 45003938                       | (A/G)       |
| 2006        | CakSNP2006     | <i>Kabuli</i>    | <i>Ca_Kabuli_Chr01</i>       | 45003939                       | (T/A)       |
| 2007        | CakSNP2007     | <i>Kabuli</i>    | <i>Ca_Kabuli_Chr01</i>       | 45003940                       | (T/G)       |
| 2008        | CakSNP2008     | <i>Kabuli</i>    | <i>Ca_Kabuli_Chr01</i>       | 45003944                       | (C/T)       |
| 2009        | CakSNP2009     | <i>Kabuli</i>    | <i>Ca_Kabuli_Chr01</i>       | 45003945                       | (T/A)       |
| 2010        | CakSNP2010     | <i>Kabuli</i>    | <i>Ca_Kabuli_Chr01</i>       | 45003946                       | (T/G)       |
| 2011        | CakSNP2011     | <i>Kabuli</i>    | <i>Ca_Kabuli_Chr01</i>       | 45003947                       | (C/A)       |
| 2012        | CakSNP2012     | <i>Kabuli</i>    | <i>Ca_Kabuli_Chr01</i>       | 45003973                       | (T/C)       |
| 2013        | CakSNP2013     | <i>Kabuli</i>    | <i>Ca_Kabuli_Chr01</i>       | 45003985                       | (G/T)       |
| 2014        | CakSNP2014     | <i>Kabuli</i>    | <i>Ca_Kabuli_Chr01</i>       | 45003998                       | (G/A)       |
| 2015        | CakSNP2015     | <i>Kabuli</i>    | <i>Ca_Kabuli_Chr01</i>       | 45004001                       | (C/T)       |
| 2016        | CakSNP2016     | <i>Kabuli</i>    | <i>Ca_Kabuli_Chr01</i>       | 45007032                       | (A/C)       |
| 2017        | CakSNP2017     | <i>Kabuli</i>    | <i>Ca_Kabuli_Chr01</i>       | 45007227                       | (T/C)       |
| 2018        | CakSNP2018     | <i>Kabuli</i>    | <i>Ca_Kabuli_Chr01</i>       | 45007259                       | (A/G)       |
| 2019        | CakSNP2019     | <i>Kabuli</i>    | <i>Ca_Kabuli_Chr01</i>       | 45007331                       | (C/T)       |
| 2020        | CakSNP2020     | <i>Kabuli</i>    | <i>Ca_Kabuli_Chr01</i>       | 45008076                       | (G/A)       |
| 2021        | CakSNP2021     | <i>Kabuli</i>    | <i>Ca_Kabuli_Chr01</i>       | 45008075                       | (T/C)       |
| 2022        | CakSNP2022     | <i>Kabuli</i>    | <i>Ca_Kabuli_Chr01</i>       | 45008073                       | (T/G)       |
| 2023        | CakSNP2023     | <i>Kabuli</i>    | <i>Ca_Kabuli_Chr01</i>       | 45008071                       | (G/C)       |
| 2024        | CakSNP2024     | <i>Kabuli</i>    | <i>Ca_Kabuli_Chr01</i>       | 45008050                       | (C/G)       |
| 2025        | CakSNP2025     | <i>Kabuli</i>    | <i>Ca_Kabuli_Chr01</i>       | 45008044                       | (T/C)       |
| 2026        | CakSNP2026     | <i>Kabuli</i>    | <i>Ca_Kabuli_Chr01</i>       | 45008041                       | (C/G)       |

| <b>S.N.</b> | <b>SNP IDs</b> | <b>Cultivars</b> | <b>Chromosomes/scaffolds</b> | <b>Physical positions (bp)</b> | <b>SNPs</b> |
|-------------|----------------|------------------|------------------------------|--------------------------------|-------------|
| 2027        | CakSNP2027     | <i>Kabuli</i>    | <i>Ca_Kabuli_Chr01</i>       | 45008040                       | (G/C)       |
| 2028        | CakSNP2028     | <i>Kabuli</i>    | <i>Ca_Kabuli_Chr01</i>       | 45008039                       | (C/T)       |
| 2029        | CakSNP2029     | <i>Kabuli</i>    | <i>Ca_Kabuli_Chr01</i>       | 45008016                       | (T/A)       |
| 2030        | CakSNP2030     | <i>Kabuli</i>    | <i>Ca_Kabuli_Chr01</i>       | 45008015                       | (G/A)       |
| 2031        | CakSNP2031     | <i>Kabuli</i>    | <i>Ca_Kabuli_Chr01</i>       | 45008009                       | (C/T)       |
| 2032        | CakSNP2032     | <i>Kabuli</i>    | <i>Ca_Kabuli_Chr01</i>       | 45008006                       | (C/A)       |
| 2033        | CakSNP2033     | <i>Kabuli</i>    | <i>Ca_Kabuli_Chr01</i>       | 45008004                       | (C/T)       |
| 2034        | CakSNP2034     | <i>Kabuli</i>    | <i>Ca_Kabuli_Chr01</i>       | 45008074                       | (C/T)       |
| 2035        | CakSNP2035     | <i>Kabuli</i>    | <i>Ca_Kabuli_Chr01</i>       | 45250874                       | (G/A)       |
| 2036        | CakSNP2036     | <i>Kabuli</i>    | <i>Ca_Kabuli_Chr01</i>       | 45250872                       | (G/T)       |
| 2037        | CakSNP2037     | <i>Kabuli</i>    | <i>Ca_Kabuli_Chr01</i>       | 45250869                       | (G/A)       |
| 2038        | CakSNP2038     | <i>Kabuli</i>    | <i>Ca_Kabuli_Chr01</i>       | 45250863                       | (C/T)       |
| 2039        | CakSNP2039     | <i>Kabuli</i>    | <i>Ca_Kabuli_Chr01</i>       | 45250862                       | (A/T)       |
| 2040        | CakSNP2040     | <i>Kabuli</i>    | <i>Ca_Kabuli_Chr01</i>       | 45250834                       | (A/G)       |
| 2041        | CakSNP2041     | <i>Kabuli</i>    | <i>Ca_Kabuli_Chr01</i>       | 45250828                       | (G/C)       |
| 2042        | CakSNP2042     | <i>Kabuli</i>    | <i>Ca_Kabuli_Chr01</i>       | 45250807                       | (C/G)       |
| 2043        | CakSNP2043     | <i>Kabuli</i>    | <i>Ca_Kabuli_Chr01</i>       | 45250805                       | (A/C)       |
| 2044        | CakSNP2044     | <i>Kabuli</i>    | <i>Ca_Kabuli_Chr01</i>       | 45250803                       | (A/G)       |
| 2045        | CakSNP2045     | <i>Kabuli</i>    | <i>Ca_Kabuli_Chr01</i>       | 45250802                       | (C/T)       |
| 2046        | CakSNP2046     | <i>Kabuli</i>    | <i>Ca_Kabuli_Chr01</i>       | 46437023                       | (T/G)       |
| 2047        | CakSNP2047     | <i>Kabuli</i>    | <i>Ca_Kabuli_Chr01</i>       | 46523221                       | (C/T)       |
| 2048        | CakSNP2048     | <i>Kabuli</i>    | <i>Ca_Kabuli_Chr01</i>       | 46597131                       | (T/G)       |
| 2049        | CakSNP2049     | <i>Kabuli</i>    | <i>Ca_Kabuli_Chr01</i>       | 46745628                       | (C/A)       |
| 2050        | CakSNP2050     | <i>Kabuli</i>    | <i>Ca_Kabuli_Chr01</i>       | 46778814                       | (A/C)       |
| 2051        | CakSNP2051     | <i>Kabuli</i>    | <i>Ca_Kabuli_Chr01</i>       | 46791939                       | (T/G)       |
| 2052        | CakSNP2052     | <i>Kabuli</i>    | <i>Ca_Kabuli_Chr01</i>       | 46793244                       | (G/A)       |
| 2053        | CakSNP2053     | <i>Kabuli</i>    | <i>Ca_Kabuli_Chr01</i>       | 46793357                       | (T/C)       |
| 2054        | CakSNP2054     | <i>Kabuli</i>    | <i>Ca_Kabuli_Chr01</i>       | 46793331                       | (C/G)       |
| 2055        | CakSNP2055     | <i>Kabuli</i>    | <i>Ca_Kabuli_Chr01</i>       | 46816041                       | (A/T)       |
| 2056        | CakSNP2056     | <i>Kabuli</i>    | <i>Ca_Kabuli_Chr01</i>       | 46825211                       | (G/A)       |
| 2057        | CakSNP2057     | <i>Kabuli</i>    | <i>Ca_Kabuli_Chr01</i>       | 46829662                       | (C/T)       |
| 2058        | CakSNP2058     | <i>Kabuli</i>    | <i>Ca_Kabuli_Chr01</i>       | 46832306                       | (T/G)       |
| 2059        | CakSNP2059     | <i>Kabuli</i>    | <i>Ca_Kabuli_Chr01</i>       | 46832395                       | (A/G)       |
| 2060        | CakSNP2060     | <i>Kabuli</i>    | <i>Ca_Kabuli_Chr01</i>       | 46832383                       | (T/C)       |
| 2061        | CakSNP2061     | <i>Kabuli</i>    | <i>Ca_Kabuli_Chr01</i>       | 46920524                       | (C/T)       |
| 2062        | CakSNP2062     | <i>Kabuli</i>    | <i>Ca_Kabuli_Chr01</i>       | 46920554                       | (T/C)       |
| 2063        | CakSNP2063     | <i>Kabuli</i>    | <i>Ca_Kabuli_Chr01</i>       | 46936196                       | (C/A)       |
| 2064        | CakSNP2064     | <i>Kabuli</i>    | <i>Ca_Kabuli_Chr01</i>       | 46936201                       | (C/T)       |
| 2065        | CakSNP2065     | <i>Kabuli</i>    | <i>Ca_Kabuli_Chr01</i>       | 46936207                       | (C/A)       |

| <b>S.N.</b> | <b>SNP IDs</b> | <b>Cultivars</b> | <b>Chromosomes/scaffolds</b> | <b>Physical positions (bp)</b> | <b>SNPs</b> |
|-------------|----------------|------------------|------------------------------|--------------------------------|-------------|
| 2066        | CakSNP2066     | <i>Kabuli</i>    | <i>Ca_Kabuli_Chr01</i>       | 46936209                       | (C/T)       |
| 2067        | CakSNP2067     | <i>Kabuli</i>    | <i>Ca_Kabuli_Chr01</i>       | 46936329                       | (C/A)       |
| 2068        | CakSNP2068     | <i>Kabuli</i>    | <i>Ca_Kabuli_Chr01</i>       | 46936297                       | (A/G)       |
| 2069        | CakSNP2069     | <i>Kabuli</i>    | <i>Ca_Kabuli_Chr01</i>       | 46936428                       | (T/C)       |
| 2070        | CakSNP2070     | <i>Kabuli</i>    | <i>Ca_Kabuli_Chr01</i>       | 46936460                       | (A/C)       |
| 2071        | CakSNP2071     | <i>Kabuli</i>    | <i>Ca_Kabuli_Chr01</i>       | 46936456                       | (T/C)       |
| 2072        | CakSNP2072     | <i>Kabuli</i>    | <i>Ca_Kabuli_Chr01</i>       | 46936448                       | (A/C)       |
| 2073        | CakSNP2073     | <i>Kabuli</i>    | <i>Ca_Kabuli_Chr01</i>       | 46936447                       | (G/A)       |
| 2074        | CakSNP2074     | <i>Kabuli</i>    | <i>Ca_Kabuli_Chr01</i>       | 46941875                       | (T/C)       |
| 2075        | CakSNP2075     | <i>Kabuli</i>    | <i>Ca_Kabuli_Chr01</i>       | 46968740                       | (T/C)       |
| 2076        | CakSNP2076     | <i>Kabuli</i>    | <i>Ca_Kabuli_Chr01</i>       | 46969221                       | (T/A)       |
| 2077        | CakSNP2077     | <i>Kabuli</i>    | <i>Ca_Kabuli_Chr01</i>       | 46976508                       | (A/G)       |
| 2078        | CakSNP2078     | <i>Kabuli</i>    | <i>Ca_Kabuli_Chr01</i>       | 47042798                       | (T/A)       |
| 2079        | CakSNP2079     | <i>Kabuli</i>    | <i>Ca_Kabuli_Chr01</i>       | 47203123                       | (A/C)       |
| 2080        | CakSNP2080     | <i>Kabuli</i>    | <i>Ca_Kabuli_Chr01</i>       | 47263589                       | (C/T)       |
| 2081        | CakSNP2081     | <i>Kabuli</i>    | <i>Ca_Kabuli_Chr01</i>       | 47278505                       | (T/C)       |
| 2082        | CakSNP2082     | <i>Kabuli</i>    | <i>Ca_Kabuli_Chr01</i>       | 47331082                       | (T/C)       |
| 2083        | CakSNP2083     | <i>Kabuli</i>    | <i>Ca_Kabuli_Chr01</i>       | 47331080                       | (T/C)       |
| 2084        | CakSNP2084     | <i>Kabuli</i>    | <i>Ca_Kabuli_Chr01</i>       | 47423715                       | (A/T)       |
| 2085        | CakSNP2085     | <i>Kabuli</i>    | <i>Ca_Kabuli_Chr01</i>       | 47449818                       | (A/G)       |
| 2086        | CakSNP2086     | <i>Kabuli</i>    | <i>Ca_Kabuli_Chr01</i>       | 47449950                       | (T/C)       |
| 2087        | CakSNP2087     | <i>Kabuli</i>    | <i>Ca_Kabuli_Chr01</i>       | 47449891                       | (T/C)       |
| 2088        | CakSNP2088     | <i>Kabuli</i>    | <i>Ca_Kabuli_Chr01</i>       | 47449882                       | (A/C)       |
| 2089        | CakSNP2089     | <i>Kabuli</i>    | <i>Ca_Kabuli_Chr01</i>       | 47801491                       | (A/G)       |
| 2090        | CakSNP2090     | <i>Kabuli</i>    | <i>Ca_Kabuli_Chr01</i>       | 47890026                       | (C/T)       |
| 2091        | CakSNP2091     | <i>Kabuli</i>    | <i>Ca_Kabuli_Chr01</i>       | 47897914                       | (C/T)       |
| 2092        | CakSNP2092     | <i>Kabuli</i>    | <i>Ca_Kabuli_Chr01</i>       | 47936748                       | (G/A)       |
| 2093        | CakSNP2093     | <i>Kabuli</i>    | <i>Ca_Kabuli_Chr01</i>       | 47936841                       | (A/G)       |
| 2094        | CakSNP2094     | <i>Kabuli</i>    | <i>Ca_Kabuli_Chr01</i>       | 47938884                       | (T/G)       |
| 2095        | CakSNP2095     | <i>Kabuli</i>    | <i>Ca_Kabuli_Chr01</i>       | 47947009                       | (T/C)       |
| 2096        | CakSNP2096     | <i>Kabuli</i>    | <i>Ca_Kabuli_Chr01</i>       | 47947281                       | (A/C)       |
| 2097        | CakSNP2097     | <i>Kabuli</i>    | <i>Ca_Kabuli_Chr01</i>       | 48026664                       | (G/T)       |
| 2098        | CakSNP2098     | <i>Kabuli</i>    | <i>Ca_Kabuli_Chr01</i>       | 48026701                       | (C/T)       |
| 2099        | CakSNP2099     | <i>Kabuli</i>    | <i>Ca_Kabuli_Chr01</i>       | 48026716                       | (T/G)       |
| 2100        | CakSNP2100     | <i>Kabuli</i>    | <i>Ca_Kabuli_Chr01</i>       | 48026727                       | (A/C)       |
| 2101        | CakSNP2101     | <i>Kabuli</i>    | <i>Ca_Kabuli_Chr01</i>       | 48027714                       | (C/A)       |
| 2102        | CakSNP2102     | <i>Kabuli</i>    | <i>Ca_Kabuli_Chr01</i>       | 48027869                       | (T/C)       |
| 2103        | CakSNP2103     | <i>Kabuli</i>    | <i>Ca_Kabuli_Chr01</i>       | 48028094                       | (G/A)       |
| 2104        | CakSNP2104     | <i>Kabuli</i>    | <i>Ca_Kabuli_Chr01</i>       | 48049293                       | (C/T)       |

| <b>S.N.</b> | <b>SNP IDs</b> | <b>Cultivars</b> | <b>Chromosomes/scaffolds</b> | <b>Physical positions (bp)</b> | <b>SNPs</b> |
|-------------|----------------|------------------|------------------------------|--------------------------------|-------------|
| 2105        | CakSNP2105     | <i>Kabuli</i>    | <i>Ca_Kabuli_Chr01</i>       | 48132217                       | (G/A)       |
| 2106        | CakSNP2106     | <i>Kabuli</i>    | <i>Ca_Kabuli_Chr01</i>       | 48132521                       | (A/C)       |
| 2107        | CakSNP2107     | <i>Kabuli</i>    | <i>Ca_Kabuli_Chr01</i>       | 48154321                       | (A/C)       |
| 2108        | CakSNP2108     | <i>Kabuli</i>    | <i>Ca_Kabuli_Chr01</i>       | 48191460                       | (T/A)       |
| 2109        | CakSNP2109     | <i>Kabuli</i>    | <i>Ca_Kabuli_Chr01</i>       | 48195174                       | (T/A)       |
| 2110        | CakSNP2110     | <i>Kabuli</i>    | <i>Ca_Kabuli_Chr01</i>       | 48197895                       | (A/T)       |
| 2111        | CakSNP2111     | <i>Kabuli</i>    | <i>Ca_Kabuli_Chr01</i>       | 48197911                       | (T/G)       |
| 2112        | CakSNP2112     | <i>Kabuli</i>    | <i>Ca_Kabuli_Chr01</i>       | 48197979                       | (A/G)       |
| 2113        | CakSNP2113     | <i>Kabuli</i>    | <i>Ca_Kabuli_Chr01</i>       | 48197969                       | (G/A)       |
| 2114        | CakSNP2114     | <i>Kabuli</i>    | <i>Ca_Kabuli_Chr01</i>       | 48198932                       | (A/T)       |
| 2115        | CakSNP2115     | <i>Kabuli</i>    | <i>Ca_Kabuli_Chr01</i>       | 48265590                       | (T/G)       |
| 2116        | CakSNP2116     | <i>Kabuli</i>    | <i>Ca_Kabuli_Chr01</i>       | 48273097                       | (G/C)       |
| 2117        | CakSNP2117     | <i>Kabuli</i>    | <i>Ca_Kabuli_Chr01</i>       | 48273307                       | (C/T)       |
| 2118        | CakSNP2118     | <i>Kabuli</i>    | <i>Ca_Kabuli_Chr02</i>       | 113330                         | (C/T)       |
| 2119        | CakSNP2119     | <i>Kabuli</i>    | <i>Ca_Kabuli_Chr02</i>       | 149250                         | (C/A)       |
| 2120        | CakSNP2120     | <i>Kabuli</i>    | <i>Ca_Kabuli_Chr02</i>       | 149251                         | (A/T)       |
| 2121        | CakSNP2121     | <i>Kabuli</i>    | <i>Ca_Kabuli_Chr02</i>       | 149259                         | (A/C)       |
| 2122        | CakSNP2122     | <i>Kabuli</i>    | <i>Ca_Kabuli_Chr02</i>       | 149269                         | (C/T)       |
| 2123        | CakSNP2123     | <i>Kabuli</i>    | <i>Ca_Kabuli_Chr02</i>       | 149278                         | (G/T)       |
| 2124        | CakSNP2124     | <i>Kabuli</i>    | <i>Ca_Kabuli_Chr02</i>       | 149315                         | (C/A)       |
| 2125        | CakSNP2125     | <i>Kabuli</i>    | <i>Ca_Kabuli_Chr02</i>       | 149322                         | (C/A)       |
| 2126        | CakSNP2126     | <i>Kabuli</i>    | <i>Ca_Kabuli_Chr02</i>       | 149402                         | (C/T)       |
| 2127        | CakSNP2127     | <i>Kabuli</i>    | <i>Ca_Kabuli_Chr02</i>       | 149395                         | (T/C)       |
| 2128        | CakSNP2128     | <i>Kabuli</i>    | <i>Ca_Kabuli_Chr02</i>       | 189287                         | (A/G)       |
| 2129        | CakSNP2129     | <i>Kabuli</i>    | <i>Ca_Kabuli_Chr02</i>       | 189784                         | (C/A)       |
| 2130        | CakSNP2130     | <i>Kabuli</i>    | <i>Ca_Kabuli_Chr02</i>       | 221903                         | (A/T)       |
| 2131        | CakSNP2131     | <i>Kabuli</i>    | <i>Ca_Kabuli_Chr02</i>       | 221955                         | (A/G)       |
| 2132        | CakSNP2132     | <i>Kabuli</i>    | <i>Ca_Kabuli_Chr02</i>       | 233589                         | (C/T)       |
| 2133        | CakSNP2133     | <i>Kabuli</i>    | <i>Ca_Kabuli_Chr02</i>       | 270139                         | (G/A)       |
| 2134        | CakSNP2134     | <i>Kabuli</i>    | <i>Ca_Kabuli_Chr02</i>       | 354795                         | (T/C)       |
| 2135        | CakSNP2135     | <i>Kabuli</i>    | <i>Ca_Kabuli_Chr02</i>       | 355905                         | (T/C)       |
| 2136        | CakSNP2136     | <i>Kabuli</i>    | <i>Ca_Kabuli_Chr02</i>       | 507857                         | (G/T)       |
| 2137        | CakSNP2137     | <i>Kabuli</i>    | <i>Ca_Kabuli_Chr02</i>       | 522943                         | (A/G)       |
| 2138        | CakSNP2138     | <i>Kabuli</i>    | <i>Ca_Kabuli_Chr02</i>       | 543360                         | (G/T)       |
| 2139        | CakSNP2139     | <i>Kabuli</i>    | <i>Ca_Kabuli_Chr02</i>       | 616251                         | (C/T)       |
| 2140        | CakSNP2140     | <i>Kabuli</i>    | <i>Ca_Kabuli_Chr02</i>       | 616410                         | (C/G)       |
| 2141        | CakSNP2141     | <i>Kabuli</i>    | <i>Ca_Kabuli_Chr02</i>       | 669304                         | (A/T)       |
| 2142        | CakSNP2142     | <i>Kabuli</i>    | <i>Ca_Kabuli_Chr02</i>       | 728957                         | (T/C)       |
| 2143        | CakSNP2143     | <i>Kabuli</i>    | <i>Ca_Kabuli_Chr02</i>       | 737183                         | (T/G)       |



| <b>S.N.</b> | <b>SNP IDs</b> | <b>Cultivars</b> | <b>Chromosomes/scaffolds</b> | <b>Physical positions (bp)</b> | <b>SNPs</b> |
|-------------|----------------|------------------|------------------------------|--------------------------------|-------------|
| 2144        | CakSNP2144     | <i>Kabuli</i>    | <i>Ca_Kabuli_Chr02</i>       | 770164                         | (A/C)       |
| 2145        | CakSNP2145     | <i>Kabuli</i>    | <i>Ca_Kabuli_Chr02</i>       | 770183                         | (C/T)       |
| 2146        | CakSNP2146     | <i>Kabuli</i>    | <i>Ca_Kabuli_Chr02</i>       | 770234                         | (C/T)       |
| 2147        | CakSNP2147     | <i>Kabuli</i>    | <i>Ca_Kabuli_Chr02</i>       | 770237                         | (C/T)       |
| 2148        | CakSNP2148     | <i>Kabuli</i>    | <i>Ca_Kabuli_Chr02</i>       | 770225                         | (C/T)       |
| 2149        | CakSNP2149     | <i>Kabuli</i>    | <i>Ca_Kabuli_Chr02</i>       | 770260                         | (C/T)       |
| 2150        | CakSNP2150     | <i>Kabuli</i>    | <i>Ca_Kabuli_Chr02</i>       | 770266                         | (C/A)       |
| 2151        | CakSNP2151     | <i>Kabuli</i>    | <i>Ca_Kabuli_Chr02</i>       | 1231486                        | (A/G)       |
| 2152        | CakSNP2152     | <i>Kabuli</i>    | <i>Ca_Kabuli_Chr02</i>       | 1231500                        | (A/G)       |
| 2153        | CakSNP2153     | <i>Kabuli</i>    | <i>Ca_Kabuli_Chr02</i>       | 1231519                        | (T/C)       |
| 2154        | CakSNP2154     | <i>Kabuli</i>    | <i>Ca_Kabuli_Chr02</i>       | 1231618                        | (G/A)       |
| 2155        | CakSNP2155     | <i>Kabuli</i>    | <i>Ca_Kabuli_Chr02</i>       | 1234932                        | (C/T)       |
| 2156        | CakSNP2156     | <i>Kabuli</i>    | <i>Ca_Kabuli_Chr02</i>       | 1235018                        | (G/A)       |
| 2157        | CakSNP2157     | <i>Kabuli</i>    | <i>Ca_Kabuli_Chr02</i>       | 1234983                        | (T/C)       |
| 2158        | CakSNP2158     | <i>Kabuli</i>    | <i>Ca_Kabuli_Chr02</i>       | 1314367                        | (G/A)       |
| 2159        | CakSNP2159     | <i>Kabuli</i>    | <i>Ca_Kabuli_Chr02</i>       | 1368911                        | (A/G)       |
| 2160        | CakSNP2160     | <i>Kabuli</i>    | <i>Ca_Kabuli_Chr02</i>       | 1389661                        | (A/G)       |
| 2161        | CakSNP2161     | <i>Kabuli</i>    | <i>Ca_Kabuli_Chr02</i>       | 1397779                        | (C/T)       |
| 2162        | CakSNP2162     | <i>Kabuli</i>    | <i>Ca_Kabuli_Chr02</i>       | 1429186                        | (T/C)       |
| 2163        | CakSNP2163     | <i>Kabuli</i>    | <i>Ca_Kabuli_Chr02</i>       | 1429471                        | (G/C)       |
| 2164        | CakSNP2164     | <i>Kabuli</i>    | <i>Ca_Kabuli_Chr02</i>       | 1431368                        | (A/C)       |
| 2165        | CakSNP2165     | <i>Kabuli</i>    | <i>Ca_Kabuli_Chr02</i>       | 1493971                        | (A/G)       |
| 2166        | CakSNP2166     | <i>Kabuli</i>    | <i>Ca_Kabuli_Chr02</i>       | 1610477                        | (G/T)       |
| 2167        | CakSNP2167     | <i>Kabuli</i>    | <i>Ca_Kabuli_Chr02</i>       | 1668116                        | (A/G)       |
| 2168        | CakSNP2168     | <i>Kabuli</i>    | <i>Ca_Kabuli_Chr02</i>       | 1713343                        | (T/C)       |
| 2169        | CakSNP2169     | <i>Kabuli</i>    | <i>Ca_Kabuli_Chr02</i>       | 1797399                        | (A/G)       |
| 2170        | CakSNP2170     | <i>Kabuli</i>    | <i>Ca_Kabuli_Chr02</i>       | 1801341                        | (C/T)       |
| 2171        | CakSNP2171     | <i>Kabuli</i>    | <i>Ca_Kabuli_Chr02</i>       | 1828318                        | (T/C)       |
| 2172        | CakSNP2172     | <i>Kabuli</i>    | <i>Ca_Kabuli_Chr02</i>       | 1828406                        | (G/A)       |
| 2173        | CakSNP2173     | <i>Kabuli</i>    | <i>Ca_Kabuli_Chr02</i>       | 1829772                        | (C/T)       |
| 2174        | CakSNP2174     | <i>Kabuli</i>    | <i>Ca_Kabuli_Chr02</i>       | 1835055                        | (G/A)       |
| 2175        | CakSNP2175     | <i>Kabuli</i>    | <i>Ca_Kabuli_Chr02</i>       | 1841290                        | (A/T)       |
| 2176        | CakSNP2176     | <i>Kabuli</i>    | <i>Ca_Kabuli_Chr02</i>       | 1841267                        | (C/T)       |
| 2177        | CakSNP2177     | <i>Kabuli</i>    | <i>Ca_Kabuli_Chr02</i>       | 1867041                        | (C/A)       |
| 2178        | CakSNP2178     | <i>Kabuli</i>    | <i>Ca_Kabuli_Chr02</i>       | 1882691                        | (C/T)       |
| 2179        | CakSNP2179     | <i>Kabuli</i>    | <i>Ca_Kabuli_Chr02</i>       | 1884583                        | (C/T)       |
| 2180        | CakSNP2180     | <i>Kabuli</i>    | <i>Ca_Kabuli_Chr02</i>       | 1884704                        | (A/G)       |
| 2181        | CakSNP2181     | <i>Kabuli</i>    | <i>Ca_Kabuli_Chr02</i>       | 1888657                        | (C/G)       |
| 2182        | CakSNP2182     | <i>Kabuli</i>    | <i>Ca_Kabuli_Chr02</i>       | 1953614                        | (T/C)       |

| <b>S.N.</b> | <b>SNP IDs</b> | <b>Cultivars</b> | <b>Chromosomes/scaffolds</b> | <b>Physical positions (bp)</b> | <b>SNPs</b> |
|-------------|----------------|------------------|------------------------------|--------------------------------|-------------|
| 2183        | CakSNP2183     | <i>Kabuli</i>    | <i>Ca_Kabuli_Chr02</i>       | 1997914                        | (C/T)       |
| 2184        | CakSNP2184     | <i>Kabuli</i>    | <i>Ca_Kabuli_Chr02</i>       | 1998003                        | (C/T)       |
| 2185        | CakSNP2185     | <i>Kabuli</i>    | <i>Ca_Kabuli_Chr02</i>       | 2086763                        | (T/G)       |
| 2186        | CakSNP2186     | <i>Kabuli</i>    | <i>Ca_Kabuli_Chr02</i>       | 2220871                        | (C/T)       |
| 2187        | CakSNP2187     | <i>Kabuli</i>    | <i>Ca_Kabuli_Chr02</i>       | 2227118                        | (A/G)       |
| 2188        | CakSNP2188     | <i>Kabuli</i>    | <i>Ca_Kabuli_Chr02</i>       | 2227074                        | (T/C)       |
| 2189        | CakSNP2189     | <i>Kabuli</i>    | <i>Ca_Kabuli_Chr02</i>       | 2227465                        | (G/A)       |
| 2190        | CakSNP2190     | <i>Kabuli</i>    | <i>Ca_Kabuli_Chr02</i>       | 2230089                        | (G/A)       |
| 2191        | CakSNP2191     | <i>Kabuli</i>    | <i>Ca_Kabuli_Chr02</i>       | 2230056                        | (T/C)       |
| 2192        | CakSNP2192     | <i>Kabuli</i>    | <i>Ca_Kabuli_Chr02</i>       | 2230984                        | (T/G)       |
| 2193        | CakSNP2193     | <i>Kabuli</i>    | <i>Ca_Kabuli_Chr02</i>       | 2230980                        | (C/A)       |
| 2194        | CakSNP2194     | <i>Kabuli</i>    | <i>Ca_Kabuli_Chr02</i>       | 2230976                        | (T/G)       |
| 2195        | CakSNP2195     | <i>Kabuli</i>    | <i>Ca_Kabuli_Chr02</i>       | 2246678                        | (T/C)       |
| 2196        | CakSNP2196     | <i>Kabuli</i>    | <i>Ca_Kabuli_Chr02</i>       | 2311915                        | (C/A)       |
| 2197        | CakSNP2197     | <i>Kabuli</i>    | <i>Ca_Kabuli_Chr02</i>       | 2311917                        | (A/C)       |
| 2198        | CakSNP2198     | <i>Kabuli</i>    | <i>Ca_Kabuli_Chr02</i>       | 2312104                        | (C/T)       |
| 2199        | CakSNP2199     | <i>Kabuli</i>    | <i>Ca_Kabuli_Chr02</i>       | 2312037                        | (T/G)       |
| 2200        | CakSNP2200     | <i>Kabuli</i>    | <i>Ca_Kabuli_Chr02</i>       | 2344777                        | (G/A)       |
| 2201        | CakSNP2201     | <i>Kabuli</i>    | <i>Ca_Kabuli_Chr02</i>       | 2344778                        | (A/G)       |
| 2202        | CakSNP2202     | <i>Kabuli</i>    | <i>Ca_Kabuli_Chr02</i>       | 2344786                        | (G/A)       |
| 2203        | CakSNP2203     | <i>Kabuli</i>    | <i>Ca_Kabuli_Chr02</i>       | 2344835                        | (G/T)       |
| 2204        | CakSNP2204     | <i>Kabuli</i>    | <i>Ca_Kabuli_Chr02</i>       | 2414265                        | (A/G)       |
| 2205        | CakSNP2205     | <i>Kabuli</i>    | <i>Ca_Kabuli_Chr02</i>       | 2416422                        | (C/T)       |
| 2206        | CakSNP2206     | <i>Kabuli</i>    | <i>Ca_Kabuli_Chr02</i>       | 2441571                        | (G/A)       |
| 2207        | CakSNP2207     | <i>Kabuli</i>    | <i>Ca_Kabuli_Chr02</i>       | 2602831                        | (A/C)       |
| 2208        | CakSNP2208     | <i>Kabuli</i>    | <i>Ca_Kabuli_Chr02</i>       | 2650375                        | (T/C)       |
| 2209        | CakSNP2209     | <i>Kabuli</i>    | <i>Ca_Kabuli_Chr02</i>       | 2650373                        | (A/T)       |
| 2210        | CakSNP2210     | <i>Kabuli</i>    | <i>Ca_Kabuli_Chr02</i>       | 2652189                        | (A/T)       |
| 2211        | CakSNP2211     | <i>Kabuli</i>    | <i>Ca_Kabuli_Chr02</i>       | 2682235                        | (T/C)       |
| 2212        | CakSNP2212     | <i>Kabuli</i>    | <i>Ca_Kabuli_Chr02</i>       | 2682293                        | (T/C)       |
| 2213        | CakSNP2213     | <i>Kabuli</i>    | <i>Ca_Kabuli_Chr02</i>       | 2682321                        | (G/A)       |
| 2214        | CakSNP2214     | <i>Kabuli</i>    | <i>Ca_Kabuli_Chr02</i>       | 2682375                        | (A/G)       |
| 2215        | CakSNP2215     | <i>Kabuli</i>    | <i>Ca_Kabuli_Chr02</i>       | 2682408                        | (G/A)       |
| 2216        | CakSNP2216     | <i>Kabuli</i>    | <i>Ca_Kabuli_Chr02</i>       | 2682471                        | (A/G)       |
| 2217        | CakSNP2217     | <i>Kabuli</i>    | <i>Ca_Kabuli_Chr02</i>       | 2685299                        | (T/C)       |
| 2218        | CakSNP2218     | <i>Kabuli</i>    | <i>Ca_Kabuli_Chr02</i>       | 2697688                        | (G/C)       |
| 2219        | CakSNP2219     | <i>Kabuli</i>    | <i>Ca_Kabuli_Chr02</i>       | 2708805                        | (G/C)       |
| 2220        | CakSNP2220     | <i>Kabuli</i>    | <i>Ca_Kabuli_Chr02</i>       | 2780283                        | (C/T)       |
| 2221        | CakSNP2221     | <i>Kabuli</i>    | <i>Ca_Kabuli_Chr02</i>       | 2783727                        | (G/A)       |

| <b>S.N.</b> | <b>SNP IDs</b> | <b>Cultivars</b> | <b>Chromosomes/scaffolds</b> | <b>Physical positions (bp)</b> | <b>SNPs</b> |
|-------------|----------------|------------------|------------------------------|--------------------------------|-------------|
| 2222        | CakSNP2222     | <i>Kabuli</i>    | <i>Ca_Kabuli_Chr02</i>       | 2846667                        | (T/C)       |
| 2223        | CakSNP2223     | <i>Kabuli</i>    | <i>Ca_Kabuli_Chr02</i>       | 2846774                        | (C/A)       |
| 2224        | CakSNP2224     | <i>Kabuli</i>    | <i>Ca_Kabuli_Chr02</i>       | 2965867                        | (G/A)       |
| 2225        | CakSNP2225     | <i>Kabuli</i>    | <i>Ca_Kabuli_Chr02</i>       | 3099959                        | (C/A)       |
| 2226        | CakSNP2226     | <i>Kabuli</i>    | <i>Ca_Kabuli_Chr02</i>       | 3099997                        | (A/T)       |
| 2227        | CakSNP2227     | <i>Kabuli</i>    | <i>Ca_Kabuli_Chr02</i>       | 3100116                        | (A/G)       |
| 2228        | CakSNP2228     | <i>Kabuli</i>    | <i>Ca_Kabuli_Chr02</i>       | 3113560                        | (G/A)       |
| 2229        | CakSNP2229     | <i>Kabuli</i>    | <i>Ca_Kabuli_Chr02</i>       | 3141128                        | (A/C)       |
| 2230        | CakSNP2230     | <i>Kabuli</i>    | <i>Ca_Kabuli_Chr02</i>       | 3164404                        | (A/G)       |
| 2231        | CakSNP2231     | <i>Kabuli</i>    | <i>Ca_Kabuli_Chr02</i>       | 3164355                        | (G/A)       |
| 2232        | CakSNP2232     | <i>Kabuli</i>    | <i>Ca_Kabuli_Chr02</i>       | 3366023                        | (C/T)       |
| 2233        | CakSNP2233     | <i>Kabuli</i>    | <i>Ca_Kabuli_Chr02</i>       | 3410375                        | (C/T)       |
| 2234        | CakSNP2234     | <i>Kabuli</i>    | <i>Ca_Kabuli_Chr02</i>       | 3450904                        | (C/A)       |
| 2235        | CakSNP2235     | <i>Kabuli</i>    | <i>Ca_Kabuli_Chr02</i>       | 3503763                        | (T/G)       |
| 2236        | CakSNP2236     | <i>Kabuli</i>    | <i>Ca_Kabuli_Chr02</i>       | 3503759                        | (T/A)       |
| 2237        | CakSNP2237     | <i>Kabuli</i>    | <i>Ca_Kabuli_Chr02</i>       | 3503753                        | (C/G)       |
| 2238        | CakSNP2238     | <i>Kabuli</i>    | <i>Ca_Kabuli_Chr02</i>       | 3503750                        | (C/G)       |
| 2239        | CakSNP2239     | <i>Kabuli</i>    | <i>Ca_Kabuli_Chr02</i>       | 3789808                        | (G/T)       |
| 2240        | CakSNP2240     | <i>Kabuli</i>    | <i>Ca_Kabuli_Chr02</i>       | 3843814                        | (C/T)       |
| 2241        | CakSNP2241     | <i>Kabuli</i>    | <i>Ca_Kabuli_Chr02</i>       | 3843826                        | (T/C)       |
| 2242        | CakSNP2242     | <i>Kabuli</i>    | <i>Ca_Kabuli_Chr02</i>       | 3843836                        | (G/A)       |
| 2243        | CakSNP2243     | <i>Kabuli</i>    | <i>Ca_Kabuli_Chr02</i>       | 3852203                        | (C/A)       |
| 2244        | CakSNP2244     | <i>Kabuli</i>    | <i>Ca_Kabuli_Chr02</i>       | 3894041                        | (G/T)       |
| 2245        | CakSNP2245     | <i>Kabuli</i>    | <i>Ca_Kabuli_Chr02</i>       | 3904757                        | (G/A)       |
| 2246        | CakSNP2246     | <i>Kabuli</i>    | <i>Ca_Kabuli_Chr02</i>       | 3904761                        | (A/G)       |
| 2247        | CakSNP2247     | <i>Kabuli</i>    | <i>Ca_Kabuli_Chr02</i>       | 3908928                        | (A/G)       |
| 2248        | CakSNP2248     | <i>Kabuli</i>    | <i>Ca_Kabuli_Chr02</i>       | 3908955                        | (G/A)       |
| 2249        | CakSNP2249     | <i>Kabuli</i>    | <i>Ca_Kabuli_Chr02</i>       | 3909068                        | (G/A)       |
| 2250        | CakSNP2250     | <i>Kabuli</i>    | <i>Ca_Kabuli_Chr02</i>       | 3909062                        | (C/T)       |
| 2251        | CakSNP2251     | <i>Kabuli</i>    | <i>Ca_Kabuli_Chr02</i>       | 3915549                        | (A/G)       |
| 2252        | CakSNP2252     | <i>Kabuli</i>    | <i>Ca_Kabuli_Chr02</i>       | 3930211                        | (A/G)       |
| 2253        | CakSNP2253     | <i>Kabuli</i>    | <i>Ca_Kabuli_Chr02</i>       | 3930182                        | (A/G)       |
| 2254        | CakSNP2254     | <i>Kabuli</i>    | <i>Ca_Kabuli_Chr02</i>       | 3941397                        | (A/T)       |
| 2255        | CakSNP2255     | <i>Kabuli</i>    | <i>Ca_Kabuli_Chr02</i>       | 3994150                        | (A/C)       |
| 2256        | CakSNP2256     | <i>Kabuli</i>    | <i>Ca_Kabuli_Chr02</i>       | 3998491                        | (A/C)       |
| 2257        | CakSNP2257     | <i>Kabuli</i>    | <i>Ca_Kabuli_Chr02</i>       | 3999615                        | (C/T)       |
| 2258        | CakSNP2258     | <i>Kabuli</i>    | <i>Ca_Kabuli_Chr02</i>       | 4039745                        | (T/C)       |
| 2259        | CakSNP2259     | <i>Kabuli</i>    | <i>Ca_Kabuli_Chr02</i>       | 4039854                        | (G/A)       |
| 2260        | CakSNP2260     | <i>Kabuli</i>    | <i>Ca_Kabuli_Chr02</i>       | 4325658                        | (A/C)       |

| <b>S.N.</b> | <b>SNP IDs</b> | <b>Cultivars</b> | <b>Chromosomes/scaffolds</b> | <b>Physical positions (bp)</b> | <b>SNPs</b> |
|-------------|----------------|------------------|------------------------------|--------------------------------|-------------|
| 2261        | CakSNP2261     | <i>Kabuli</i>    | <i>Ca_Kabuli_Chr02</i>       | 4325684                        | (C/A)       |
| 2262        | CakSNP2262     | <i>Kabuli</i>    | <i>Ca_Kabuli_Chr02</i>       | 4404813                        | (C/T)       |
| 2263        | CakSNP2263     | <i>Kabuli</i>    | <i>Ca_Kabuli_Chr02</i>       | 4404797                        | (G/A)       |
| 2264        | CakSNP2264     | <i>Kabuli</i>    | <i>Ca_Kabuli_Chr02</i>       | 4966216                        | (C/T)       |
| 2265        | CakSNP2265     | <i>Kabuli</i>    | <i>Ca_Kabuli_Chr02</i>       | 4966168                        | (G/C)       |
| 2266        | CakSNP2266     | <i>Kabuli</i>    | <i>Ca_Kabuli_Chr02</i>       | 4981626                        | (A/G)       |
| 2267        | CakSNP2267     | <i>Kabuli</i>    | <i>Ca_Kabuli_Chr02</i>       | 4981698                        | (C/T)       |
| 2268        | CakSNP2268     | <i>Kabuli</i>    | <i>Ca_Kabuli_Chr02</i>       | 4981686                        | (T/C)       |
| 2269        | CakSNP2269     | <i>Kabuli</i>    | <i>Ca_Kabuli_Chr02</i>       | 4981666                        | (G/C)       |
| 2270        | CakSNP2270     | <i>Kabuli</i>    | <i>Ca_Kabuli_Chr02</i>       | 5017291                        | (T/A)       |
| 2271        | CakSNP2271     | <i>Kabuli</i>    | <i>Ca_Kabuli_Chr02</i>       | 5017330                        | (G/C)       |
| 2272        | CakSNP2272     | <i>Kabuli</i>    | <i>Ca_Kabuli_Chr02</i>       | 5078323                        | (T/C)       |
| 2273        | CakSNP2273     | <i>Kabuli</i>    | <i>Ca_Kabuli_Chr02</i>       | 5079639                        | (C/T)       |
| 2274        | CakSNP2274     | <i>Kabuli</i>    | <i>Ca_Kabuli_Chr02</i>       | 5085761                        | (A/C)       |
| 2275        | CakSNP2275     | <i>Kabuli</i>    | <i>Ca_Kabuli_Chr02</i>       | 5085836                        | (G/C)       |
| 2276        | CakSNP2276     | <i>Kabuli</i>    | <i>Ca_Kabuli_Chr02</i>       | 5100017                        | (T/A)       |
| 2277        | CakSNP2277     | <i>Kabuli</i>    | <i>Ca_Kabuli_Chr02</i>       | 5099985                        | (A/G)       |
| 2278        | CakSNP2278     | <i>Kabuli</i>    | <i>Ca_Kabuli_Chr02</i>       | 5118370                        | (A/T)       |
| 2279        | CakSNP2279     | <i>Kabuli</i>    | <i>Ca_Kabuli_Chr02</i>       | 5118364                        | (C/T)       |
| 2280        | CakSNP2280     | <i>Kabuli</i>    | <i>Ca_Kabuli_Chr02</i>       | 5141075                        | (C/T)       |
| 2281        | CakSNP2281     | <i>Kabuli</i>    | <i>Ca_Kabuli_Chr02</i>       | 5141081                        | (A/T)       |
| 2282        | CakSNP2282     | <i>Kabuli</i>    | <i>Ca_Kabuli_Chr02</i>       | 5247305                        | (T/C)       |
| 2283        | CakSNP2283     | <i>Kabuli</i>    | <i>Ca_Kabuli_Chr02</i>       | 5247548                        | (G/T)       |
| 2284        | CakSNP2284     | <i>Kabuli</i>    | <i>Ca_Kabuli_Chr02</i>       | 5247547                        | (A/G)       |
| 2285        | CakSNP2285     | <i>Kabuli</i>    | <i>Ca_Kabuli_Chr02</i>       | 5247540                        | (T/C)       |
| 2286        | CakSNP2286     | <i>Kabuli</i>    | <i>Ca_Kabuli_Chr02</i>       | 5247481                        | (T/A)       |
| 2287        | CakSNP2287     | <i>Kabuli</i>    | <i>Ca_Kabuli_Chr02</i>       | 5247557                        | (A/C)       |
| 2288        | CakSNP2288     | <i>Kabuli</i>    | <i>Ca_Kabuli_Chr02</i>       | 5247558                        | (G/T)       |
| 2289        | CakSNP2289     | <i>Kabuli</i>    | <i>Ca_Kabuli_Chr02</i>       | 5259254                        | (T/C)       |
| 2290        | CakSNP2290     | <i>Kabuli</i>    | <i>Ca_Kabuli_Chr02</i>       | 5276208                        | (T/C)       |
| 2291        | CakSNP2291     | <i>Kabuli</i>    | <i>Ca_Kabuli_Chr02</i>       | 5342864                        | (C/A)       |
| 2292        | CakSNP2292     | <i>Kabuli</i>    | <i>Ca_Kabuli_Chr02</i>       | 5342923                        | (A/G)       |
| 2293        | CakSNP2293     | <i>Kabuli</i>    | <i>Ca_Kabuli_Chr02</i>       | 5359177                        | (C/A)       |
| 2294        | CakSNP2294     | <i>Kabuli</i>    | <i>Ca_Kabuli_Chr02</i>       | 5449886                        | (C/T)       |
| 2295        | CakSNP2295     | <i>Kabuli</i>    | <i>Ca_Kabuli_Chr02</i>       | 5449978                        | (T/C)       |
| 2296        | CakSNP2296     | <i>Kabuli</i>    | <i>Ca_Kabuli_Chr02</i>       | 5449907                        | (G/A)       |
| 2297        | CakSNP2297     | <i>Kabuli</i>    | <i>Ca_Kabuli_Chr02</i>       | 5462902                        | (A/T)       |
| 2298        | CakSNP2298     | <i>Kabuli</i>    | <i>Ca_Kabuli_Chr02</i>       | 5468575                        | (A/T)       |
| 2299        | CakSNP2299     | <i>Kabuli</i>    | <i>Ca_Kabuli_Chr02</i>       | 5475329                        | (C/A)       |

| <b>S.N.</b> | <b>SNP IDs</b> | <b>Cultivars</b> | <b>Chromosomes/scaffolds</b> | <b>Physical positions (bp)</b> | <b>SNPs</b> |
|-------------|----------------|------------------|------------------------------|--------------------------------|-------------|
| 2300        | CakSNP2300     | <i>Kabuli</i>    | <i>Ca_Kabuli_Chr02</i>       | 5475344                        | (A/G)       |
| 2301        | CakSNP2301     | <i>Kabuli</i>    | <i>Ca_Kabuli_Chr02</i>       | 5475365                        | (T/C)       |
| 2302        | CakSNP2302     | <i>Kabuli</i>    | <i>Ca_Kabuli_Chr02</i>       | 5475407                        | (C/T)       |
| 2303        | CakSNP2303     | <i>Kabuli</i>    | <i>Ca_Kabuli_Chr02</i>       | 5504300                        | (T/G)       |
| 2304        | CakSNP2304     | <i>Kabuli</i>    | <i>Ca_Kabuli_Chr02</i>       | 5601092                        | (G/C)       |
| 2305        | CakSNP2305     | <i>Kabuli</i>    | <i>Ca_Kabuli_Chr02</i>       | 5787862                        | (G/A)       |
| 2306        | CakSNP2306     | <i>Kabuli</i>    | <i>Ca_Kabuli_Chr02</i>       | 5787887                        | (A/C)       |
| 2307        | CakSNP2307     | <i>Kabuli</i>    | <i>Ca_Kabuli_Chr02</i>       | 5877688                        | (A/G)       |
| 2308        | CakSNP2308     | <i>Kabuli</i>    | <i>Ca_Kabuli_Chr02</i>       | 5881503                        | (A/G)       |
| 2309        | CakSNP2309     | <i>Kabuli</i>    | <i>Ca_Kabuli_Chr02</i>       | 5897314                        | (T/C)       |
| 2310        | CakSNP2310     | <i>Kabuli</i>    | <i>Ca_Kabuli_Chr02</i>       | 5904368                        | (T/C)       |
| 2311        | CakSNP2311     | <i>Kabuli</i>    | <i>Ca_Kabuli_Chr02</i>       | 5936796                        | (C/A)       |
| 2312        | CakSNP2312     | <i>Kabuli</i>    | <i>Ca_Kabuli_Chr02</i>       | 5936902                        | (A/T)       |
| 2313        | CakSNP2313     | <i>Kabuli</i>    | <i>Ca_Kabuli_Chr02</i>       | 6042131                        | (G/A)       |
| 2314        | CakSNP2314     | <i>Kabuli</i>    | <i>Ca_Kabuli_Chr02</i>       | 6042139                        | (C/A)       |
| 2315        | CakSNP2315     | <i>Kabuli</i>    | <i>Ca_Kabuli_Chr02</i>       | 6042210                        | (C/A)       |
| 2316        | CakSNP2316     | <i>Kabuli</i>    | <i>Ca_Kabuli_Chr02</i>       | 6060259                        | (G/C)       |
| 2317        | CakSNP2317     | <i>Kabuli</i>    | <i>Ca_Kabuli_Chr02</i>       | 6130301                        | (G/C)       |
| 2318        | CakSNP2318     | <i>Kabuli</i>    | <i>Ca_Kabuli_Chr02</i>       | 6130257                        | (C/A)       |
| 2319        | CakSNP2319     | <i>Kabuli</i>    | <i>Ca_Kabuli_Chr02</i>       | 6130247                        | (G/C)       |
| 2320        | CakSNP2320     | <i>Kabuli</i>    | <i>Ca_Kabuli_Chr02</i>       | 6162378                        | (T/G)       |
| 2321        | CakSNP2321     | <i>Kabuli</i>    | <i>Ca_Kabuli_Chr02</i>       | 6162406                        | (G/C)       |
| 2322        | CakSNP2322     | <i>Kabuli</i>    | <i>Ca_Kabuli_Chr02</i>       | 6213582                        | (T/A)       |
| 2323        | CakSNP2323     | <i>Kabuli</i>    | <i>Ca_Kabuli_Chr02</i>       | 6213580                        | (C/A)       |
| 2324        | CakSNP2324     | <i>Kabuli</i>    | <i>Ca_Kabuli_Chr02</i>       | 6213566                        | (C/T)       |
| 2325        | CakSNP2325     | <i>Kabuli</i>    | <i>Ca_Kabuli_Chr02</i>       | 6213530                        | (C/A)       |
| 2326        | CakSNP2326     | <i>Kabuli</i>    | <i>Ca_Kabuli_Chr02</i>       | 6213520                        | (G/T)       |
| 2327        | CakSNP2327     | <i>Kabuli</i>    | <i>Ca_Kabuli_Chr02</i>       | 6349208                        | (T/G)       |
| 2328        | CakSNP2328     | <i>Kabuli</i>    | <i>Ca_Kabuli_Chr02</i>       | 6367649                        | (A/G)       |
| 2329        | CakSNP2329     | <i>Kabuli</i>    | <i>Ca_Kabuli_Chr02</i>       | 6367704                        | (A/G)       |
| 2330        | CakSNP2330     | <i>Kabuli</i>    | <i>Ca_Kabuli_Chr02</i>       | 6391819                        | (T/C)       |
| 2331        | CakSNP2331     | <i>Kabuli</i>    | <i>Ca_Kabuli_Chr02</i>       | 6392158                        | (A/T)       |
| 2332        | CakSNP2332     | <i>Kabuli</i>    | <i>Ca_Kabuli_Chr02</i>       | 6392209                        | (G/A)       |
| 2333        | CakSNP2333     | <i>Kabuli</i>    | <i>Ca_Kabuli_Chr02</i>       | 6392272                        | (T/C)       |
| 2334        | CakSNP2334     | <i>Kabuli</i>    | <i>Ca_Kabuli_Chr02</i>       | 6392254                        | (T/C)       |
| 2335        | CakSNP2335     | <i>Kabuli</i>    | <i>Ca_Kabuli_Chr02</i>       | 6392449                        | (A/G)       |
| 2336        | CakSNP2336     | <i>Kabuli</i>    | <i>Ca_Kabuli_Chr02</i>       | 6397551                        | (A/G)       |
| 2337        | CakSNP2337     | <i>Kabuli</i>    | <i>Ca_Kabuli_Chr02</i>       | 6397597                        | (A/C)       |
| 2338        | CakSNP2338     | <i>Kabuli</i>    | <i>Ca_Kabuli_Chr02</i>       | 6408406                        | (C/A)       |

| <b>S.N.</b> | <b>SNP IDs</b> | <b>Cultivars</b> | <b>Chromosomes/scaffolds</b> | <b>Physical positions (bp)</b> | <b>SNPs</b> |
|-------------|----------------|------------------|------------------------------|--------------------------------|-------------|
| 2339        | CakSNP2339     | <i>Kabuli</i>    | <i>Ca_Kabuli_Chr02</i>       | 6534776                        | (C/A)       |
| 2340        | CakSNP2340     | <i>Kabuli</i>    | <i>Ca_Kabuli_Chr02</i>       | 6537296                        | (G/T)       |
| 2341        | CakSNP2341     | <i>Kabuli</i>    | <i>Ca_Kabuli_Chr02</i>       | 6537300                        | (G/T)       |
| 2342        | CakSNP2342     | <i>Kabuli</i>    | <i>Ca_Kabuli_Chr02</i>       | 6727932                        | (G/C)       |
| 2343        | CakSNP2343     | <i>Kabuli</i>    | <i>Ca_Kabuli_Chr02</i>       | 6727905                        | (G/C)       |
| 2344        | CakSNP2344     | <i>Kabuli</i>    | <i>Ca_Kabuli_Chr02</i>       | 6727900                        | (G/C)       |
| 2345        | CakSNP2345     | <i>Kabuli</i>    | <i>Ca_Kabuli_Chr02</i>       | 6728716                        | (A/T)       |
| 2346        | CakSNP2346     | <i>Kabuli</i>    | <i>Ca_Kabuli_Chr02</i>       | 6728719                        | (C/T)       |
| 2347        | CakSNP2347     | <i>Kabuli</i>    | <i>Ca_Kabuli_Chr02</i>       | 6728763                        | (T/C)       |
| 2348        | CakSNP2348     | <i>Kabuli</i>    | <i>Ca_Kabuli_Chr02</i>       | 6989950                        | (A/G)       |
| 2349        | CakSNP2349     | <i>Kabuli</i>    | <i>Ca_Kabuli_Chr02</i>       | 6990083                        | (G/A)       |
| 2350        | CakSNP2350     | <i>Kabuli</i>    | <i>Ca_Kabuli_Chr02</i>       | 7007701                        | (G/C)       |
| 2351        | CakSNP2351     | <i>Kabuli</i>    | <i>Ca_Kabuli_Chr02</i>       | 7027093                        | (G/A)       |
| 2352        | CakSNP2352     | <i>Kabuli</i>    | <i>Ca_Kabuli_Chr02</i>       | 7027146                        | (T/C)       |
| 2353        | CakSNP2353     | <i>Kabuli</i>    | <i>Ca_Kabuli_Chr02</i>       | 7047195                        | (C/A)       |
| 2354        | CakSNP2354     | <i>Kabuli</i>    | <i>Ca_Kabuli_Chr02</i>       | 7047196                        | (T/C)       |
| 2355        | CakSNP2355     | <i>Kabuli</i>    | <i>Ca_Kabuli_Chr02</i>       | 7047197                        | (G/C)       |
| 2356        | CakSNP2356     | <i>Kabuli</i>    | <i>Ca_Kabuli_Chr02</i>       | 7051451                        | (G/A)       |
| 2357        | CakSNP2357     | <i>Kabuli</i>    | <i>Ca_Kabuli_Chr02</i>       | 7125992                        | (T/G)       |
| 2358        | CakSNP2358     | <i>Kabuli</i>    | <i>Ca_Kabuli_Chr02</i>       | 7126018                        | (T/G)       |
| 2359        | CakSNP2359     | <i>Kabuli</i>    | <i>Ca_Kabuli_Chr02</i>       | 7507259                        | (C/A)       |
| 2360        | CakSNP2360     | <i>Kabuli</i>    | <i>Ca_Kabuli_Chr02</i>       | 7633520                        | (G/A)       |
| 2361        | CakSNP2361     | <i>Kabuli</i>    | <i>Ca_Kabuli_Chr02</i>       | 7633547                        | (C/T)       |
| 2362        | CakSNP2362     | <i>Kabuli</i>    | <i>Ca_Kabuli_Chr02</i>       | 7633564                        | (G/T)       |
| 2363        | CakSNP2363     | <i>Kabuli</i>    | <i>Ca_Kabuli_Chr02</i>       | 7633572                        | (T/C)       |
| 2364        | CakSNP2364     | <i>Kabuli</i>    | <i>Ca_Kabuli_Chr02</i>       | 7633605                        | (T/A)       |
| 2365        | CakSNP2365     | <i>Kabuli</i>    | <i>Ca_Kabuli_Chr02</i>       | 7633592                        | (G/A)       |
| 2366        | CakSNP2366     | <i>Kabuli</i>    | <i>Ca_Kabuli_Chr02</i>       | 7633585                        | (G/A)       |
| 2367        | CakSNP2367     | <i>Kabuli</i>    | <i>Ca_Kabuli_Chr02</i>       | 7633869                        | (G/A)       |
| 2368        | CakSNP2368     | <i>Kabuli</i>    | <i>Ca_Kabuli_Chr02</i>       | 7633826                        | (G/A)       |
| 2369        | CakSNP2369     | <i>Kabuli</i>    | <i>Ca_Kabuli_Chr02</i>       | 7633818                        | (G/A)       |
| 2370        | CakSNP2370     | <i>Kabuli</i>    | <i>Ca_Kabuli_Chr02</i>       | 7633816                        | (G/A)       |
| 2371        | CakSNP2371     | <i>Kabuli</i>    | <i>Ca_Kabuli_Chr02</i>       | 7633813                        | (G/T)       |
| 2372        | CakSNP2372     | <i>Kabuli</i>    | <i>Ca_Kabuli_Chr02</i>       | 7633793                        | (C/T)       |
| 2373        | CakSNP2373     | <i>Kabuli</i>    | <i>Ca_Kabuli_Chr02</i>       | 7634041                        | (G/A)       |
| 2374        | CakSNP2374     | <i>Kabuli</i>    | <i>Ca_Kabuli_Chr02</i>       | 7679627                        | (A/T)       |
| 2375        | CakSNP2375     | <i>Kabuli</i>    | <i>Ca_Kabuli_Chr02</i>       | 7679693                        | (C/G)       |
| 2376        | CakSNP2376     | <i>Kabuli</i>    | <i>Ca_Kabuli_Chr02</i>       | 7701189                        | (T/G)       |
| 2377        | CakSNP2377     | <i>Kabuli</i>    | <i>Ca_Kabuli_Chr02</i>       | 7701199                        | (T/G)       |

| <b>S.N.</b> | <b>SNP IDs</b> | <b>Cultivars</b> | <b>Chromosomes/scaffolds</b> | <b>Physical positions (bp)</b> | <b>SNPs</b> |
|-------------|----------------|------------------|------------------------------|--------------------------------|-------------|
| 2378        | CakSNP2378     | <i>Kabuli</i>    | <i>Ca_Kabuli_Chr02</i>       | 7701216                        | (T/G)       |
| 2379        | CakSNP2379     | <i>Kabuli</i>    | <i>Ca_Kabuli_Chr02</i>       | 7701230                        | (T/G)       |
| 2380        | CakSNP2380     | <i>Kabuli</i>    | <i>Ca_Kabuli_Chr02</i>       | 7702468                        | (A/T)       |
| 2381        | CakSNP2381     | <i>Kabuli</i>    | <i>Ca_Kabuli_Chr02</i>       | 7708668                        | (C/T)       |
| 2382        | CakSNP2382     | <i>Kabuli</i>    | <i>Ca_Kabuli_Chr02</i>       | 7708663                        | (T/C)       |
| 2383        | CakSNP2383     | <i>Kabuli</i>    | <i>Ca_Kabuli_Chr02</i>       | 7708660                        | (G/A)       |
| 2384        | CakSNP2384     | <i>Kabuli</i>    | <i>Ca_Kabuli_Chr02</i>       | 7708630                        | (C/A)       |
| 2385        | CakSNP2385     | <i>Kabuli</i>    | <i>Ca_Kabuli_Chr02</i>       | 7708617                        | (G/T)       |
| 2386        | CakSNP2386     | <i>Kabuli</i>    | <i>Ca_Kabuli_Chr02</i>       | 7708603                        | (C/T)       |
| 2387        | CakSNP2387     | <i>Kabuli</i>    | <i>Ca_Kabuli_Chr02</i>       | 7708598                        | (C/T)       |
| 2388        | CakSNP2388     | <i>Kabuli</i>    | <i>Ca_Kabuli_Chr02</i>       | 7708596                        | (T/C)       |
| 2389        | CakSNP2389     | <i>Kabuli</i>    | <i>Ca_Kabuli_Chr02</i>       | 7708590                        | (A/T)       |
| 2390        | CakSNP2390     | <i>Kabuli</i>    | <i>Ca_Kabuli_Chr02</i>       | 7708678                        | (C/T)       |
| 2391        | CakSNP2391     | <i>Kabuli</i>    | <i>Ca_Kabuli_Chr02</i>       | 7712181                        | (C/T)       |
| 2392        | CakSNP2392     | <i>Kabuli</i>    | <i>Ca_Kabuli_Chr02</i>       | 7712155                        | (G/T)       |
| 2393        | CakSNP2393     | <i>Kabuli</i>    | <i>Ca_Kabuli_Chr02</i>       | 7714392                        | (G/A)       |
| 2394        | CakSNP2394     | <i>Kabuli</i>    | <i>Ca_Kabuli_Chr02</i>       | 7714454                        | (A/G)       |
| 2395        | CakSNP2395     | <i>Kabuli</i>    | <i>Ca_Kabuli_Chr02</i>       | 7714463                        | (T/C)       |
| 2396        | CakSNP2396     | <i>Kabuli</i>    | <i>Ca_Kabuli_Chr02</i>       | 7753419                        | (G/C)       |
| 2397        | CakSNP2397     | <i>Kabuli</i>    | <i>Ca_Kabuli_Chr02</i>       | 7753425                        | (T/C)       |
| 2398        | CakSNP2398     | <i>Kabuli</i>    | <i>Ca_Kabuli_Chr02</i>       | 7753440                        | (C/T)       |
| 2399        | CakSNP2399     | <i>Kabuli</i>    | <i>Ca_Kabuli_Chr02</i>       | 7819281                        | (T/C)       |
| 2400        | CakSNP2400     | <i>Kabuli</i>    | <i>Ca_Kabuli_Chr02</i>       | 7870919                        | (G/T)       |
| 2401        | CakSNP2401     | <i>Kabuli</i>    | <i>Ca_Kabuli_Chr02</i>       | 7870943                        | (T/G)       |
| 2402        | CakSNP2402     | <i>Kabuli</i>    | <i>Ca_Kabuli_Chr02</i>       | 7938890                        | (T/C)       |
| 2403        | CakSNP2403     | <i>Kabuli</i>    | <i>Ca_Kabuli_Chr02</i>       | 8337517                        | (C/T)       |
| 2404        | CakSNP2404     | <i>Kabuli</i>    | <i>Ca_Kabuli_Chr02</i>       | 8484840                        | (A/T)       |
| 2405        | CakSNP2405     | <i>Kabuli</i>    | <i>Ca_Kabuli_Chr02</i>       | 8487331                        | (T/A)       |
| 2406        | CakSNP2406     | <i>Kabuli</i>    | <i>Ca_Kabuli_Chr02</i>       | 8487343                        | (C/T)       |
| 2407        | CakSNP2407     | <i>Kabuli</i>    | <i>Ca_Kabuli_Chr02</i>       | 8489241                        | (C/A)       |
| 2408        | CakSNP2408     | <i>Kabuli</i>    | <i>Ca_Kabuli_Chr02</i>       | 8489237                        | (G/A)       |
| 2409        | CakSNP2409     | <i>Kabuli</i>    | <i>Ca_Kabuli_Chr02</i>       | 8489172                        | (C/A)       |
| 2410        | CakSNP2410     | <i>Kabuli</i>    | <i>Ca_Kabuli_Chr02</i>       | 8600256                        | (C/G)       |
| 2411        | CakSNP2411     | <i>Kabuli</i>    | <i>Ca_Kabuli_Chr02</i>       | 8600298                        | (A/G)       |
| 2412        | CakSNP2412     | <i>Kabuli</i>    | <i>Ca_Kabuli_Chr02</i>       | 8600309                        | (T/C)       |
| 2413        | CakSNP2413     | <i>Kabuli</i>    | <i>Ca_Kabuli_Chr02</i>       | 8600450                        | (C/T)       |
| 2414        | CakSNP2414     | <i>Kabuli</i>    | <i>Ca_Kabuli_Chr02</i>       | 8600666                        | (T/C)       |
| 2415        | CakSNP2415     | <i>Kabuli</i>    | <i>Ca_Kabuli_Chr02</i>       | 8685674                        | (G/A)       |
| 2416        | CakSNP2416     | <i>Kabuli</i>    | <i>Ca_Kabuli_Chr02</i>       | 8719725                        | (T/A)       |

| <b>S.N.</b> | <b>SNP IDs</b> | <b>Cultivars</b> | <b>Chromosomes/scaffolds</b> | <b>Physical positions (bp)</b> | <b>SNPs</b> |
|-------------|----------------|------------------|------------------------------|--------------------------------|-------------|
| 2417        | CakSNP2417     | <i>Kabuli</i>    | <i>Ca_Kabuli_Chr02</i>       | 8734136                        | (G/A)       |
| 2418        | CakSNP2418     | <i>Kabuli</i>    | <i>Ca_Kabuli_Chr02</i>       | 8802884                        | (A/G)       |
| 2419        | CakSNP2419     | <i>Kabuli</i>    | <i>Ca_Kabuli_Chr02</i>       | 9458933                        | (C/T)       |
| 2420        | CakSNP2420     | <i>Kabuli</i>    | <i>Ca_Kabuli_Chr02</i>       | 9458985                        | (A/G)       |
| 2421        | CakSNP2421     | <i>Kabuli</i>    | <i>Ca_Kabuli_Chr02</i>       | 9473339                        | (T/C)       |
| 2422        | CakSNP2422     | <i>Kabuli</i>    | <i>Ca_Kabuli_Chr02</i>       | 9473353                        | (C/A)       |
| 2423        | CakSNP2423     | <i>Kabuli</i>    | <i>Ca_Kabuli_Chr02</i>       | 9473362                        | (G/A)       |
| 2424        | CakSNP2424     | <i>Kabuli</i>    | <i>Ca_Kabuli_Chr02</i>       | 9473380                        | (A/G)       |
| 2425        | CakSNP2425     | <i>Kabuli</i>    | <i>Ca_Kabuli_Chr02</i>       | 9473393                        | (G/A)       |
| 2426        | CakSNP2426     | <i>Kabuli</i>    | <i>Ca_Kabuli_Chr02</i>       | 9473474                        | (T/A)       |
| 2427        | CakSNP2427     | <i>Kabuli</i>    | <i>Ca_Kabuli_Chr02</i>       | 9473452                        | (A/G)       |
| 2428        | CakSNP2428     | <i>Kabuli</i>    | <i>Ca_Kabuli_Chr02</i>       | 9473430                        | (A/G)       |
| 2429        | CakSNP2429     | <i>Kabuli</i>    | <i>Ca_Kabuli_Chr02</i>       | 9621953                        | (A/C)       |
| 2430        | CakSNP2430     | <i>Kabuli</i>    | <i>Ca_Kabuli_Chr02</i>       | 9740018                        | (G/A)       |
| 2431        | CakSNP2431     | <i>Kabuli</i>    | <i>Ca_Kabuli_Chr02</i>       | 9740017                        | (C/T)       |
| 2432        | CakSNP2432     | <i>Kabuli</i>    | <i>Ca_Kabuli_Chr02</i>       | 9740010                        | (A/G)       |
| 2433        | CakSNP2433     | <i>Kabuli</i>    | <i>Ca_Kabuli_Chr02</i>       | 9740007                        | (A/G)       |
| 2434        | CakSNP2434     | <i>Kabuli</i>    | <i>Ca_Kabuli_Chr02</i>       | 9739980                        | (G/C)       |
| 2435        | CakSNP2435     | <i>Kabuli</i>    | <i>Ca_Kabuli_Chr02</i>       | 9739974                        | (T/C)       |
| 2436        | CakSNP2436     | <i>Kabuli</i>    | <i>Ca_Kabuli_Chr02</i>       | 9739959                        | (T/C)       |
| 2437        | CakSNP2437     | <i>Kabuli</i>    | <i>Ca_Kabuli_Chr02</i>       | 9739965                        | (A/G)       |
| 2438        | CakSNP2438     | <i>Kabuli</i>    | <i>Ca_Kabuli_Chr02</i>       | 9756955                        | (G/A)       |
| 2439        | CakSNP2439     | <i>Kabuli</i>    | <i>Ca_Kabuli_Chr02</i>       | 9756946                        | (C/T)       |
| 2440        | CakSNP2440     | <i>Kabuli</i>    | <i>Ca_Kabuli_Chr02</i>       | 9756910                        | (G/A)       |
| 2441        | CakSNP2441     | <i>Kabuli</i>    | <i>Ca_Kabuli_Chr02</i>       | 9756887                        | (G/T)       |
| 2442        | CakSNP2442     | <i>Kabuli</i>    | <i>Ca_Kabuli_Chr02</i>       | 9823224                        | (G/A)       |
| 2443        | CakSNP2443     | <i>Kabuli</i>    | <i>Ca_Kabuli_Chr02</i>       | 9823165                        | (T/C)       |
| 2444        | CakSNP2444     | <i>Kabuli</i>    | <i>Ca_Kabuli_Chr02</i>       | 9825526                        | (C/G)       |
| 2445        | CakSNP2445     | <i>Kabuli</i>    | <i>Ca_Kabuli_Chr02</i>       | 9841625                        | (A/G)       |
| 2446        | CakSNP2446     | <i>Kabuli</i>    | <i>Ca_Kabuli_Chr02</i>       | 9862794                        | (A/G)       |
| 2447        | CakSNP2447     | <i>Kabuli</i>    | <i>Ca_Kabuli_Chr02</i>       | 9906042                        | (T/G)       |
| 2448        | CakSNP2448     | <i>Kabuli</i>    | <i>Ca_Kabuli_Chr02</i>       | 9906077                        | (T/A)       |
| 2449        | CakSNP2449     | <i>Kabuli</i>    | <i>Ca_Kabuli_Chr02</i>       | 9918536                        | (T/A)       |
| 2450        | CakSNP2450     | <i>Kabuli</i>    | <i>Ca_Kabuli_Chr02</i>       | 9943370                        | (A/G)       |
| 2451        | CakSNP2451     | <i>Kabuli</i>    | <i>Ca_Kabuli_Chr02</i>       | 9943374                        | (C/T)       |
| 2452        | CakSNP2452     | <i>Kabuli</i>    | <i>Ca_Kabuli_Chr02</i>       | 9943404                        | (T/G)       |
| 2453        | CakSNP2453     | <i>Kabuli</i>    | <i>Ca_Kabuli_Chr02</i>       | 9986639                        | (C/T)       |
| 2454        | CakSNP2454     | <i>Kabuli</i>    | <i>Ca_Kabuli_Chr02</i>       | 9986683                        | (C/T)       |
| 2455        | CakSNP2455     | <i>Kabuli</i>    | <i>Ca_Kabuli_Chr02</i>       | 10004694                       | (G/A)       |



| <b>S.N.</b> | <b>SNP IDs</b> | <b>Cultivars</b> | <b>Chromosomes/scaffolds</b> | <b>Physical positions (bp)</b> | <b>SNPs</b> |
|-------------|----------------|------------------|------------------------------|--------------------------------|-------------|
| 2456        | CakSNP2456     | <i>Kabuli</i>    | <i>Ca_Kabuli_Chr02</i>       | 10025451                       | (G/A)       |
| 2457        | CakSNP2457     | <i>Kabuli</i>    | <i>Ca_Kabuli_Chr02</i>       | 10033991                       | (T/C)       |
| 2458        | CakSNP2458     | <i>Kabuli</i>    | <i>Ca_Kabuli_Chr02</i>       | 10060196                       | (G/T)       |
| 2459        | CakSNP2459     | <i>Kabuli</i>    | <i>Ca_Kabuli_Chr02</i>       | 10060200                       | (G/T)       |
| 2460        | CakSNP2460     | <i>Kabuli</i>    | <i>Ca_Kabuli_Chr02</i>       | 10060207                       | (C/T)       |
| 2461        | CakSNP2461     | <i>Kabuli</i>    | <i>Ca_Kabuli_Chr02</i>       | 10067093                       | (G/C)       |
| 2462        | CakSNP2462     | <i>Kabuli</i>    | <i>Ca_Kabuli_Chr02</i>       | 10067078                       | (T/G)       |
| 2463        | CakSNP2463     | <i>Kabuli</i>    | <i>Ca_Kabuli_Chr02</i>       | 10067061                       | (T/G)       |
| 2464        | CakSNP2464     | <i>Kabuli</i>    | <i>Ca_Kabuli_Chr02</i>       | 10067195                       | (T/A)       |
| 2465        | CakSNP2465     | <i>Kabuli</i>    | <i>Ca_Kabuli_Chr02</i>       | 10067262                       | (A/C)       |
| 2466        | CakSNP2466     | <i>Kabuli</i>    | <i>Ca_Kabuli_Chr02</i>       | 10067278                       | (G/T)       |
| 2467        | CakSNP2467     | <i>Kabuli</i>    | <i>Ca_Kabuli_Chr02</i>       | 10067285                       | (T/G)       |
| 2468        | CakSNP2468     | <i>Kabuli</i>    | <i>Ca_Kabuli_Chr02</i>       | 10067286                       | (A/T)       |
| 2469        | CakSNP2469     | <i>Kabuli</i>    | <i>Ca_Kabuli_Chr02</i>       | 10067451                       | (A/T)       |
| 2470        | CakSNP2470     | <i>Kabuli</i>    | <i>Ca_Kabuli_Chr02</i>       | 10067516                       | (G/A)       |
| 2471        | CakSNP2471     | <i>Kabuli</i>    | <i>Ca_Kabuli_Chr02</i>       | 10067538                       | (C/T)       |
| 2472        | CakSNP2472     | <i>Kabuli</i>    | <i>Ca_Kabuli_Chr02</i>       | 10068214                       | (A/G)       |
| 2473        | CakSNP2473     | <i>Kabuli</i>    | <i>Ca_Kabuli_Chr02</i>       | 10220396                       | (T/C)       |
| 2474        | CakSNP2474     | <i>Kabuli</i>    | <i>Ca_Kabuli_Chr02</i>       | 10270474                       | (C/A)       |
| 2475        | CakSNP2475     | <i>Kabuli</i>    | <i>Ca_Kabuli_Chr02</i>       | 10284426                       | (C/G)       |
| 2476        | CakSNP2476     | <i>Kabuli</i>    | <i>Ca_Kabuli_Chr02</i>       | 10294698                       | (A/G)       |
| 2477        | CakSNP2477     | <i>Kabuli</i>    | <i>Ca_Kabuli_Chr02</i>       | 10294635                       | (T/C)       |
| 2478        | CakSNP2478     | <i>Kabuli</i>    | <i>Ca_Kabuli_Chr02</i>       | 10322943                       | (T/C)       |
| 2479        | CakSNP2479     | <i>Kabuli</i>    | <i>Ca_Kabuli_Chr02</i>       | 10352705                       | (T/A)       |
| 2480        | CakSNP2480     | <i>Kabuli</i>    | <i>Ca_Kabuli_Chr02</i>       | 10358484                       | (C/T)       |
| 2481        | CakSNP2481     | <i>Kabuli</i>    | <i>Ca_Kabuli_Chr02</i>       | 10358496                       | (G/T)       |
| 2482        | CakSNP2482     | <i>Kabuli</i>    | <i>Ca_Kabuli_Chr02</i>       | 10377695                       | (G/A)       |
| 2483        | CakSNP2483     | <i>Kabuli</i>    | <i>Ca_Kabuli_Chr02</i>       | 10434727                       | (T/C)       |
| 2484        | CakSNP2484     | <i>Kabuli</i>    | <i>Ca_Kabuli_Chr02</i>       | 10434726                       | (G/C)       |
| 2485        | CakSNP2485     | <i>Kabuli</i>    | <i>Ca_Kabuli_Chr02</i>       | 10434714                       | (C/G)       |
| 2486        | CakSNP2486     | <i>Kabuli</i>    | <i>Ca_Kabuli_Chr02</i>       | 10540735                       | (C/T)       |
| 2487        | CakSNP2487     | <i>Kabuli</i>    | <i>Ca_Kabuli_Chr02</i>       | 10637631                       | (C/A)       |
| 2488        | CakSNP2488     | <i>Kabuli</i>    | <i>Ca_Kabuli_Chr02</i>       | 10656518                       | (A/T)       |
| 2489        | CakSNP2489     | <i>Kabuli</i>    | <i>Ca_Kabuli_Chr02</i>       | 10705902                       | (C/A)       |
| 2490        | CakSNP2490     | <i>Kabuli</i>    | <i>Ca_Kabuli_Chr02</i>       | 10705923                       | (T/A)       |
| 2491        | CakSNP2491     | <i>Kabuli</i>    | <i>Ca_Kabuli_Chr02</i>       | 10705979                       | (C/A)       |
| 2492        | CakSNP2492     | <i>Kabuli</i>    | <i>Ca_Kabuli_Chr02</i>       | 10705982                       | (C/T)       |
| 2493        | CakSNP2493     | <i>Kabuli</i>    | <i>Ca_Kabuli_Chr02</i>       | 10760939                       | (G/A)       |
| 2494        | CakSNP2494     | <i>Kabuli</i>    | <i>Ca_Kabuli_Chr02</i>       | 10761036                       | (C/G)       |

| <b>S.N.</b> | <b>SNP IDs</b> | <b>Cultivars</b> | <b>Chromosomes/scaffolds</b> | <b>Physical positions (bp)</b> | <b>SNPs</b> |
|-------------|----------------|------------------|------------------------------|--------------------------------|-------------|
| 2495        | CakSNP2495     | <i>Kabuli</i>    | <i>Ca_Kabuli_Chr02</i>       | 11799472                       | (G/A)       |
| 2496        | CakSNP2496     | <i>Kabuli</i>    | <i>Ca_Kabuli_Chr02</i>       | 11799462                       | (G/A)       |
| 2497        | CakSNP2497     | <i>Kabuli</i>    | <i>Ca_Kabuli_Chr02</i>       | 12252285                       | (T/G)       |
| 2498        | CakSNP2498     | <i>Kabuli</i>    | <i>Ca_Kabuli_Chr02</i>       | 12252370                       | (A/G)       |
| 2499        | CakSNP2499     | <i>Kabuli</i>    | <i>Ca_Kabuli_Chr02</i>       | 12278583                       | (G/A)       |
| 2500        | CakSNP2500     | <i>Kabuli</i>    | <i>Ca_Kabuli_Chr02</i>       | 12278584                       | (T/C)       |
| 2501        | CakSNP2501     | <i>Kabuli</i>    | <i>Ca_Kabuli_Chr02</i>       | 12278606                       | (T/C)       |
| 2502        | CakSNP2502     | <i>Kabuli</i>    | <i>Ca_Kabuli_Chr02</i>       | 12281599                       | (A/C)       |
| 2503        | CakSNP2503     | <i>Kabuli</i>    | <i>Ca_Kabuli_Chr02</i>       | 12357732                       | (A/G)       |
| 2504        | CakSNP2504     | <i>Kabuli</i>    | <i>Ca_Kabuli_Chr02</i>       | 12389166                       | (G/T)       |
| 2505        | CakSNP2505     | <i>Kabuli</i>    | <i>Ca_Kabuli_Chr02</i>       | 12389112                       | (G/A)       |
| 2506        | CakSNP2506     | <i>Kabuli</i>    | <i>Ca_Kabuli_Chr02</i>       | 12515595                       | (A/G)       |
| 2507        | CakSNP2507     | <i>Kabuli</i>    | <i>Ca_Kabuli_Chr02</i>       | 12528825                       | (C/G)       |
| 2508        | CakSNP2508     | <i>Kabuli</i>    | <i>Ca_Kabuli_Chr02</i>       | 12710137                       | (G/A)       |
| 2509        | CakSNP2509     | <i>Kabuli</i>    | <i>Ca_Kabuli_Chr02</i>       | 12737814                       | (T/C)       |
| 2510        | CakSNP2510     | <i>Kabuli</i>    | <i>Ca_Kabuli_Chr02</i>       | 12794438                       | (G/A)       |
| 2511        | CakSNP2511     | <i>Kabuli</i>    | <i>Ca_Kabuli_Chr02</i>       | 12854610                       | (A/G)       |
| 2512        | CakSNP2512     | <i>Kabuli</i>    | <i>Ca_Kabuli_Chr02</i>       | 12854591                       | (T/A)       |
| 2513        | CakSNP2513     | <i>Kabuli</i>    | <i>Ca_Kabuli_Chr02</i>       | 12854586                       | (G/A)       |
| 2514        | CakSNP2514     | <i>Kabuli</i>    | <i>Ca_Kabuli_Chr02</i>       | 12862414                       | (G/C)       |
| 2515        | CakSNP2515     | <i>Kabuli</i>    | <i>Ca_Kabuli_Chr02</i>       | 13079417                       | (T/G)       |
| 2516        | CakSNP2516     | <i>Kabuli</i>    | <i>Ca_Kabuli_Chr02</i>       | 13079445                       | (T/G)       |
| 2517        | CakSNP2517     | <i>Kabuli</i>    | <i>Ca_Kabuli_Chr02</i>       | 13217781                       | (T/C)       |
| 2518        | CakSNP2518     | <i>Kabuli</i>    | <i>Ca_Kabuli_Chr02</i>       | 13355018                       | (T/G)       |
| 2519        | CakSNP2519     | <i>Kabuli</i>    | <i>Ca_Kabuli_Chr02</i>       | 13355022                       | (G/T)       |
| 2520        | CakSNP2520     | <i>Kabuli</i>    | <i>Ca_Kabuli_Chr02</i>       | 13355033                       | (A/T)       |
| 2521        | CakSNP2521     | <i>Kabuli</i>    | <i>Ca_Kabuli_Chr02</i>       | 13355615                       | (T/G)       |
| 2522        | CakSNP2522     | <i>Kabuli</i>    | <i>Ca_Kabuli_Chr02</i>       | 13425568                       | (T/A)       |
| 2523        | CakSNP2523     | <i>Kabuli</i>    | <i>Ca_Kabuli_Chr02</i>       | 13434904                       | (G/A)       |
| 2524        | CakSNP2524     | <i>Kabuli</i>    | <i>Ca_Kabuli_Chr02</i>       | 13434884                       | (T/A)       |
| 2525        | CakSNP2525     | <i>Kabuli</i>    | <i>Ca_Kabuli_Chr02</i>       | 13435043                       | (C/T)       |
| 2526        | CakSNP2526     | <i>Kabuli</i>    | <i>Ca_Kabuli_Chr02</i>       | 13435030                       | (G/C)       |
| 2527        | CakSNP2527     | <i>Kabuli</i>    | <i>Ca_Kabuli_Chr02</i>       | 13434995                       | (A/C)       |
| 2528        | CakSNP2528     | <i>Kabuli</i>    | <i>Ca_Kabuli_Chr02</i>       | 13437317                       | (A/G)       |
| 2529        | CakSNP2529     | <i>Kabuli</i>    | <i>Ca_Kabuli_Chr02</i>       | 13529057                       | (G/A)       |
| 2530        | CakSNP2530     | <i>Kabuli</i>    | <i>Ca_Kabuli_Chr02</i>       | 13552505                       | (T/A)       |
| 2531        | CakSNP2531     | <i>Kabuli</i>    | <i>Ca_Kabuli_Chr02</i>       | 13554038                       | (T/C)       |
| 2532        | CakSNP2532     | <i>Kabuli</i>    | <i>Ca_Kabuli_Chr02</i>       | 13554045                       | (T/C)       |
| 2533        | CakSNP2533     | <i>Kabuli</i>    | <i>Ca_Kabuli_Chr02</i>       | 13554047                       | (A/T)       |

| <b>S.N.</b> | <b>SNP IDs</b> | <b>Cultivars</b> | <b>Chromosomes/scaffolds</b> | <b>Physical positions (bp)</b> | <b>SNPs</b> |
|-------------|----------------|------------------|------------------------------|--------------------------------|-------------|
| 2534        | CakSNP2534     | <i>Kabuli</i>    | <i>Ca_Kabuli_Chr02</i>       | 13703083                       | (G/A)       |
| 2535        | CakSNP2535     | <i>Kabuli</i>    | <i>Ca_Kabuli_Chr02</i>       | 13782906                       | (C/A)       |
| 2536        | CakSNP2536     | <i>Kabuli</i>    | <i>Ca_Kabuli_Chr02</i>       | 14101913                       | (T/A)       |
| 2537        | CakSNP2537     | <i>Kabuli</i>    | <i>Ca_Kabuli_Chr02</i>       | 14134413                       | (A/C)       |
| 2538        | CakSNP2538     | <i>Kabuli</i>    | <i>Ca_Kabuli_Chr02</i>       | 14134676                       | (T/C)       |
| 2539        | CakSNP2539     | <i>Kabuli</i>    | <i>Ca_Kabuli_Chr02</i>       | 14136062                       | (C/A)       |
| 2540        | CakSNP2540     | <i>Kabuli</i>    | <i>Ca_Kabuli_Chr02</i>       | 14136019                       | (A/G)       |
| 2541        | CakSNP2541     | <i>Kabuli</i>    | <i>Ca_Kabuli_Chr02</i>       | 14136013                       | (T/G)       |
| 2542        | CakSNP2542     | <i>Kabuli</i>    | <i>Ca_Kabuli_Chr02</i>       | 14136223                       | (A/C)       |
| 2543        | CakSNP2543     | <i>Kabuli</i>    | <i>Ca_Kabuli_Chr02</i>       | 15160301                       | (T/C)       |
| 2544        | CakSNP2544     | <i>Kabuli</i>    | <i>Ca_Kabuli_Chr02</i>       | 15178565                       | (G/A)       |
| 2545        | CakSNP2545     | <i>Kabuli</i>    | <i>Ca_Kabuli_Chr02</i>       | 15178564                       | (A/G)       |
| 2546        | CakSNP2546     | <i>Kabuli</i>    | <i>Ca_Kabuli_Chr02</i>       | 15178540                       | (A/G)       |
| 2547        | CakSNP2547     | <i>Kabuli</i>    | <i>Ca_Kabuli_Chr02</i>       | 15181635                       | (G/T)       |
| 2548        | CakSNP2548     | <i>Kabuli</i>    | <i>Ca_Kabuli_Chr02</i>       | 15234951                       | (C/A)       |
| 2549        | CakSNP2549     | <i>Kabuli</i>    | <i>Ca_Kabuli_Chr02</i>       | 15389412                       | (G/A)       |
| 2550        | CakSNP2550     | <i>Kabuli</i>    | <i>Ca_Kabuli_Chr02</i>       | 15390673                       | (A/G)       |
| 2551        | CakSNP2551     | <i>Kabuli</i>    | <i>Ca_Kabuli_Chr02</i>       | 15390731                       | (G/A)       |
| 2552        | CakSNP2552     | <i>Kabuli</i>    | <i>Ca_Kabuli_Chr02</i>       | 15390684                       | (A/G)       |
| 2553        | CakSNP2553     | <i>Kabuli</i>    | <i>Ca_Kabuli_Chr02</i>       | 15688657                       | (G/T)       |
| 2554        | CakSNP2554     | <i>Kabuli</i>    | <i>Ca_Kabuli_Chr02</i>       | 15817688                       | (T/C)       |
| 2555        | CakSNP2555     | <i>Kabuli</i>    | <i>Ca_Kabuli_Chr02</i>       | 16460174                       | (G/A)       |
| 2556        | CakSNP2556     | <i>Kabuli</i>    | <i>Ca_Kabuli_Chr02</i>       | 16460142                       | (A/G)       |
| 2557        | CakSNP2557     | <i>Kabuli</i>    | <i>Ca_Kabuli_Chr02</i>       | 16460097                       | (C/A)       |
| 2558        | CakSNP2558     | <i>Kabuli</i>    | <i>Ca_Kabuli_Chr02</i>       | 16460106                       | (C/T)       |
| 2559        | CakSNP2559     | <i>Kabuli</i>    | <i>Ca_Kabuli_Chr02</i>       | 16460175                       | (C/A)       |
| 2560        | CakSNP2560     | <i>Kabuli</i>    | <i>Ca_Kabuli_Chr02</i>       | 16462095                       | (A/G)       |
| 2561        | CakSNP2561     | <i>Kabuli</i>    | <i>Ca_Kabuli_Chr02</i>       | 16462089                       | (C/T)       |
| 2562        | CakSNP2562     | <i>Kabuli</i>    | <i>Ca_Kabuli_Chr02</i>       | 16462056                       | (A/C)       |
| 2563        | CakSNP2563     | <i>Kabuli</i>    | <i>Ca_Kabuli_Chr02</i>       | 16462038                       | (G/T)       |
| 2564        | CakSNP2564     | <i>Kabuli</i>    | <i>Ca_Kabuli_Chr02</i>       | 16555733                       | (C/T)       |
| 2565        | CakSNP2565     | <i>Kabuli</i>    | <i>Ca_Kabuli_Chr02</i>       | 16555790                       | (C/G)       |
| 2566        | CakSNP2566     | <i>Kabuli</i>    | <i>Ca_Kabuli_Chr02</i>       | 16563117                       | (A/T)       |
| 2567        | CakSNP2567     | <i>Kabuli</i>    | <i>Ca_Kabuli_Chr02</i>       | 16563121                       | (A/T)       |
| 2568        | CakSNP2568     | <i>Kabuli</i>    | <i>Ca_Kabuli_Chr02</i>       | 16563123                       | (C/T)       |
| 2569        | CakSNP2569     | <i>Kabuli</i>    | <i>Ca_Kabuli_Chr02</i>       | 16563125                       | (A/T)       |
| 2570        | CakSNP2570     | <i>Kabuli</i>    | <i>Ca_Kabuli_Chr02</i>       | 16563133                       | (A/T)       |
| 2571        | CakSNP2571     | <i>Kabuli</i>    | <i>Ca_Kabuli_Chr02</i>       | 16705119                       | (C/T)       |
| 2572        | CakSNP2572     | <i>Kabuli</i>    | <i>Ca_Kabuli_Chr02</i>       | 17450780                       | (C/T)       |

| <b>S.N.</b> | <b>SNP IDs</b> | <b>Cultivars</b> | <b>Chromosomes/scaffolds</b> | <b>Physical positions (bp)</b> | <b>SNPs</b> |
|-------------|----------------|------------------|------------------------------|--------------------------------|-------------|
| 2573        | CakSNP2573     | <i>Kabuli</i>    | <i>Ca_Kabuli_Chr02</i>       | 17578623                       | (G/A)       |
| 2574        | CakSNP2574     | <i>Kabuli</i>    | <i>Ca_Kabuli_Chr02</i>       | 17578633                       | (C/G)       |
| 2575        | CakSNP2575     | <i>Kabuli</i>    | <i>Ca_Kabuli_Chr02</i>       | 17578659                       | (A/G)       |
| 2576        | CakSNP2576     | <i>Kabuli</i>    | <i>Ca_Kabuli_Chr02</i>       | 17578689                       | (G/A)       |
| 2577        | CakSNP2577     | <i>Kabuli</i>    | <i>Ca_Kabuli_Chr02</i>       | 17578663                       | (C/A)       |
| 2578        | CakSNP2578     | <i>Kabuli</i>    | <i>Ca_Kabuli_Chr02</i>       | 17578676                       | (T/C)       |
| 2579        | CakSNP2579     | <i>Kabuli</i>    | <i>Ca_Kabuli_Chr02</i>       | 17578701                       | (A/C)       |
| 2580        | CakSNP2580     | <i>Kabuli</i>    | <i>Ca_Kabuli_Chr02</i>       | 17578706                       | (A/T)       |
| 2581        | CakSNP2581     | <i>Kabuli</i>    | <i>Ca_Kabuli_Chr02</i>       | 17578726                       | (A/T)       |
| 2582        | CakSNP2582     | <i>Kabuli</i>    | <i>Ca_Kabuli_Chr02</i>       | 17578740                       | (A/G)       |
| 2583        | CakSNP2583     | <i>Kabuli</i>    | <i>Ca_Kabuli_Chr02</i>       | 17681915                       | (C/T)       |
| 2584        | CakSNP2584     | <i>Kabuli</i>    | <i>Ca_Kabuli_Chr02</i>       | 17716022                       | (A/T)       |
| 2585        | CakSNP2585     | <i>Kabuli</i>    | <i>Ca_Kabuli_Chr02</i>       | 17727340                       | (G/A)       |
| 2586        | CakSNP2586     | <i>Kabuli</i>    | <i>Ca_Kabuli_Chr02</i>       | 17727362                       | (G/C)       |
| 2587        | CakSNP2587     | <i>Kabuli</i>    | <i>Ca_Kabuli_Chr02</i>       | 17727403                       | (C/T)       |
| 2588        | CakSNP2588     | <i>Kabuli</i>    | <i>Ca_Kabuli_Chr02</i>       | 17839209                       | (T/A)       |
| 2589        | CakSNP2589     | <i>Kabuli</i>    | <i>Ca_Kabuli_Chr02</i>       | 17839297                       | (T/C)       |
| 2590        | CakSNP2590     | <i>Kabuli</i>    | <i>Ca_Kabuli_Chr02</i>       | 17910111                       | (C/G)       |
| 2591        | CakSNP2591     | <i>Kabuli</i>    | <i>Ca_Kabuli_Chr02</i>       | 17910145                       | (C/T)       |
| 2592        | CakSNP2592     | <i>Kabuli</i>    | <i>Ca_Kabuli_Chr02</i>       | 17910783                       | (A/T)       |
| 2593        | CakSNP2593     | <i>Kabuli</i>    | <i>Ca_Kabuli_Chr02</i>       | 18312200                       | (T/C)       |
| 2594        | CakSNP2594     | <i>Kabuli</i>    | <i>Ca_Kabuli_Chr02</i>       | 18395345                       | (A/C)       |
| 2595        | CakSNP2595     | <i>Kabuli</i>    | <i>Ca_Kabuli_Chr02</i>       | 18395410                       | (T/C)       |
| 2596        | CakSNP2596     | <i>Kabuli</i>    | <i>Ca_Kabuli_Chr02</i>       | 18395378                       | (A/G)       |
| 2597        | CakSNP2597     | <i>Kabuli</i>    | <i>Ca_Kabuli_Chr02</i>       | 18546345                       | (T/C)       |
| 2598        | CakSNP2598     | <i>Kabuli</i>    | <i>Ca_Kabuli_Chr02</i>       | 18546366                       | (A/T)       |
| 2599        | CakSNP2599     | <i>Kabuli</i>    | <i>Ca_Kabuli_Chr02</i>       | 18631367                       | (T/A)       |
| 2600        | CakSNP2600     | <i>Kabuli</i>    | <i>Ca_Kabuli_Chr02</i>       | 18631383                       | (A/G)       |
| 2601        | CakSNP2601     | <i>Kabuli</i>    | <i>Ca_Kabuli_Chr02</i>       | 18631404                       | (T/G)       |
| 2602        | CakSNP2602     | <i>Kabuli</i>    | <i>Ca_Kabuli_Chr02</i>       | 18631412                       | (T/G)       |
| 2603        | CakSNP2603     | <i>Kabuli</i>    | <i>Ca_Kabuli_Chr02</i>       | 18631522                       | (A/C)       |
| 2604        | CakSNP2604     | <i>Kabuli</i>    | <i>Ca_Kabuli_Chr02</i>       | 18671692                       | (C/A)       |
| 2605        | CakSNP2605     | <i>Kabuli</i>    | <i>Ca_Kabuli_Chr02</i>       | 18671672                       | (T/A)       |
| 2606        | CakSNP2606     | <i>Kabuli</i>    | <i>Ca_Kabuli_Chr02</i>       | 18671666                       | (C/T)       |
| 2607        | CakSNP2607     | <i>Kabuli</i>    | <i>Ca_Kabuli_Chr02</i>       | 18671637                       | (G/A)       |
| 2608        | CakSNP2608     | <i>Kabuli</i>    | <i>Ca_Kabuli_Chr02</i>       | 18671618                       | (T/G)       |
| 2609        | CakSNP2609     | <i>Kabuli</i>    | <i>Ca_Kabuli_Chr02</i>       | 18671723                       | (C/G)       |
| 2610        | CakSNP2610     | <i>Kabuli</i>    | <i>Ca_Kabuli_Chr02</i>       | 18671746                       | (C/T)       |
| 2611        | CakSNP2611     | <i>Kabuli</i>    | <i>Ca_Kabuli_Chr02</i>       | 18671756                       | (T/A)       |

| <b>S.N.</b> | <b>SNP IDs</b> | <b>Cultivars</b> | <b>Chromosomes/scaffolds</b> | <b>Physical positions (bp)</b> | <b>SNPs</b> |
|-------------|----------------|------------------|------------------------------|--------------------------------|-------------|
| 2612        | CakSNP2612     | <i>Kabuli</i>    | <i>Ca_Kabuli_Chr02</i>       | 18671765                       | (C/A)       |
| 2613        | CakSNP2613     | <i>Kabuli</i>    | <i>Ca_Kabuli_Chr02</i>       | 18671767                       | (G/C)       |
| 2614        | CakSNP2614     | <i>Kabuli</i>    | <i>Ca_Kabuli_Chr02</i>       | 18671785                       | (G/A)       |
| 2615        | CakSNP2615     | <i>Kabuli</i>    | <i>Ca_Kabuli_Chr02</i>       | 18671824                       | (C/T)       |
| 2616        | CakSNP2616     | <i>Kabuli</i>    | <i>Ca_Kabuli_Chr02</i>       | 20392224                       | (A/G)       |
| 2617        | CakSNP2617     | <i>Kabuli</i>    | <i>Ca_Kabuli_Chr02</i>       | 20762187                       | (A/G)       |
| 2618        | CakSNP2618     | <i>Kabuli</i>    | <i>Ca_Kabuli_Chr02</i>       | 20762205                       | (A/T)       |
| 2619        | CakSNP2619     | <i>Kabuli</i>    | <i>Ca_Kabuli_Chr02</i>       | 21000509                       | (C/T)       |
| 2620        | CakSNP2620     | <i>Kabuli</i>    | <i>Ca_Kabuli_Chr02</i>       | 21000466                       | (C/T)       |
| 2621        | CakSNP2621     | <i>Kabuli</i>    | <i>Ca_Kabuli_Chr02</i>       | 21000463                       | (C/T)       |
| 2622        | CakSNP2622     | <i>Kabuli</i>    | <i>Ca_Kabuli_Chr02</i>       | 21849874                       | (A/T)       |
| 2623        | CakSNP2623     | <i>Kabuli</i>    | <i>Ca_Kabuli_Chr02</i>       | 21906952                       | (A/G)       |
| 2624        | CakSNP2624     | <i>Kabuli</i>    | <i>Ca_Kabuli_Chr02</i>       | 21965365                       | (T/C)       |
| 2625        | CakSNP2625     | <i>Kabuli</i>    | <i>Ca_Kabuli_Chr02</i>       | 22158593                       | (C/T)       |
| 2626        | CakSNP2626     | <i>Kabuli</i>    | <i>Ca_Kabuli_Chr02</i>       | 22158602                       | (C/T)       |
| 2627        | CakSNP2627     | <i>Kabuli</i>    | <i>Ca_Kabuli_Chr02</i>       | 22190700                       | (C/T)       |
| 2628        | CakSNP2628     | <i>Kabuli</i>    | <i>Ca_Kabuli_Chr02</i>       | 22190743                       | (C/T)       |
| 2629        | CakSNP2629     | <i>Kabuli</i>    | <i>Ca_Kabuli_Chr02</i>       | 22190748                       | (G/T)       |
| 2630        | CakSNP2630     | <i>Kabuli</i>    | <i>Ca_Kabuli_Chr02</i>       | 22190751                       | (C/T)       |
| 2631        | CakSNP2631     | <i>Kabuli</i>    | <i>Ca_Kabuli_Chr02</i>       | 22190756                       | (C/A)       |
| 2632        | CakSNP2632     | <i>Kabuli</i>    | <i>Ca_Kabuli_Chr02</i>       | 22190753                       | (C/T)       |
| 2633        | CakSNP2633     | <i>Kabuli</i>    | <i>Ca_Kabuli_Chr02</i>       | 22190790                       | (G/A)       |
| 2634        | CakSNP2634     | <i>Kabuli</i>    | <i>Ca_Kabuli_Chr02</i>       | 22190815                       | (C/T)       |
| 2635        | CakSNP2635     | <i>Kabuli</i>    | <i>Ca_Kabuli_Chr02</i>       | 22205024                       | (G/C)       |
| 2636        | CakSNP2636     | <i>Kabuli</i>    | <i>Ca_Kabuli_Chr02</i>       | 22347405                       | (C/T)       |
| 2637        | CakSNP2637     | <i>Kabuli</i>    | <i>Ca_Kabuli_Chr02</i>       | 22415930                       | (C/T)       |
| 2638        | CakSNP2638     | <i>Kabuli</i>    | <i>Ca_Kabuli_Chr02</i>       | 22416899                       | (A/C)       |
| 2639        | CakSNP2639     | <i>Kabuli</i>    | <i>Ca_Kabuli_Chr02</i>       | 22419501                       | (C/G)       |
| 2640        | CakSNP2640     | <i>Kabuli</i>    | <i>Ca_Kabuli_Chr02</i>       | 22419513                       | (T/C)       |
| 2641        | CakSNP2641     | <i>Kabuli</i>    | <i>Ca_Kabuli_Chr02</i>       | 22419514                       | (C/T)       |
| 2642        | CakSNP2642     | <i>Kabuli</i>    | <i>Ca_Kabuli_Chr02</i>       | 22419529                       | (T/C)       |
| 2643        | CakSNP2643     | <i>Kabuli</i>    | <i>Ca_Kabuli_Chr02</i>       | 22419625                       | (C/T)       |
| 2644        | CakSNP2644     | <i>Kabuli</i>    | <i>Ca_Kabuli_Chr02</i>       | 22419633                       | (C/T)       |
| 2645        | CakSNP2645     | <i>Kabuli</i>    | <i>Ca_Kabuli_Chr02</i>       | 22419634                       | (G/C)       |
| 2646        | CakSNP2646     | <i>Kabuli</i>    | <i>Ca_Kabuli_Chr02</i>       | 22419679                       | (G/A)       |
| 2647        | CakSNP2647     | <i>Kabuli</i>    | <i>Ca_Kabuli_Chr02</i>       | 22457234                       | (G/A)       |
| 2648        | CakSNP2648     | <i>Kabuli</i>    | <i>Ca_Kabuli_Chr02</i>       | 22457221                       | (T/A)       |
| 2649        | CakSNP2649     | <i>Kabuli</i>    | <i>Ca_Kabuli_Chr02</i>       | 22457215                       | (G/A)       |
| 2650        | CakSNP2650     | <i>Kabuli</i>    | <i>Ca_Kabuli_Chr02</i>       | 22457181                       | (G/T)       |

| <b>S.N.</b> | <b>SNP IDs</b> | <b>Cultivars</b> | <b>Chromosomes/scaffolds</b> | <b>Physical positions (bp)</b> | <b>SNPs</b> |
|-------------|----------------|------------------|------------------------------|--------------------------------|-------------|
| 2651        | CakSNP2651     | <i>Kabuli</i>    | <i>Ca_Kabuli_Chr02</i>       | 22457233                       | (C/T)       |
| 2652        | CakSNP2652     | <i>Kabuli</i>    | <i>Ca_Kabuli_Chr02</i>       | 22457255                       | (C/T)       |
| 2653        | CakSNP2653     | <i>Kabuli</i>    | <i>Ca_Kabuli_Chr02</i>       | 22457263                       | (G/A)       |
| 2654        | CakSNP2654     | <i>Kabuli</i>    | <i>Ca_Kabuli_Chr02</i>       | 22457257                       | (G/A)       |
| 2655        | CakSNP2655     | <i>Kabuli</i>    | <i>Ca_Kabuli_Chr02</i>       | 22483072                       | (C/T)       |
| 2656        | CakSNP2656     | <i>Kabuli</i>    | <i>Ca_Kabuli_Chr02</i>       | 22483067                       | (G/A)       |
| 2657        | CakSNP2657     | <i>Kabuli</i>    | <i>Ca_Kabuli_Chr02</i>       | 22483052                       | (C/T)       |
| 2658        | CakSNP2658     | <i>Kabuli</i>    | <i>Ca_Kabuli_Chr02</i>       | 22483019                       | (A/T)       |
| 2659        | CakSNP2659     | <i>Kabuli</i>    | <i>Ca_Kabuli_Chr02</i>       | 22703091                       | (A/C)       |
| 2660        | CakSNP2660     | <i>Kabuli</i>    | <i>Ca_Kabuli_Chr02</i>       | 22820616                       | (C/G)       |
| 2661        | CakSNP2661     | <i>Kabuli</i>    | <i>Ca_Kabuli_Chr02</i>       | 22820588                       | (A/C)       |
| 2662        | CakSNP2662     | <i>Kabuli</i>    | <i>Ca_Kabuli_Chr02</i>       | 22897694                       | (G/A)       |
| 2663        | CakSNP2663     | <i>Kabuli</i>    | <i>Ca_Kabuli_Chr02</i>       | 22897647                       | (T/C)       |
| 2664        | CakSNP2664     | <i>Kabuli</i>    | <i>Ca_Kabuli_Chr02</i>       | 23123734                       | (C/T)       |
| 2665        | CakSNP2665     | <i>Kabuli</i>    | <i>Ca_Kabuli_Chr02</i>       | 23141564                       | (C/T)       |
| 2666        | CakSNP2666     | <i>Kabuli</i>    | <i>Ca_Kabuli_Chr02</i>       | 23181353                       | (C/T)       |
| 2667        | CakSNP2667     | <i>Kabuli</i>    | <i>Ca_Kabuli_Chr02</i>       | 23247801                       | (C/T)       |
| 2668        | CakSNP2668     | <i>Kabuli</i>    | <i>Ca_Kabuli_Chr02</i>       | 23282374                       | (T/C)       |
| 2669        | CakSNP2669     | <i>Kabuli</i>    | <i>Ca_Kabuli_Chr02</i>       | 23297412                       | (G/A)       |
| 2670        | CakSNP2670     | <i>Kabuli</i>    | <i>Ca_Kabuli_Chr02</i>       | 23329325                       | (G/T)       |
| 2671        | CakSNP2671     | <i>Kabuli</i>    | <i>Ca_Kabuli_Chr02</i>       | 23329424                       | (C/T)       |
| 2672        | CakSNP2672     | <i>Kabuli</i>    | <i>Ca_Kabuli_Chr02</i>       | 23329440                       | (G/A)       |
| 2673        | CakSNP2673     | <i>Kabuli</i>    | <i>Ca_Kabuli_Chr02</i>       | 23417518                       | (T/G)       |
| 2674        | CakSNP2674     | <i>Kabuli</i>    | <i>Ca_Kabuli_Chr02</i>       | 23435939                       | (A/G)       |
| 2675        | CakSNP2675     | <i>Kabuli</i>    | <i>Ca_Kabuli_Chr02</i>       | 23439966                       | (T/C)       |
| 2676        | CakSNP2676     | <i>Kabuli</i>    | <i>Ca_Kabuli_Chr02</i>       | 23441740                       | (A/G)       |
| 2677        | CakSNP2677     | <i>Kabuli</i>    | <i>Ca_Kabuli_Chr02</i>       | 23910254                       | (T/C)       |
| 2678        | CakSNP2678     | <i>Kabuli</i>    | <i>Ca_Kabuli_Chr02</i>       | 23961003                       | (G/A)       |
| 2679        | CakSNP2679     | <i>Kabuli</i>    | <i>Ca_Kabuli_Chr02</i>       | 24048087                       | (A/C)       |
| 2680        | CakSNP2680     | <i>Kabuli</i>    | <i>Ca_Kabuli_Chr02</i>       | 24098243                       | (T/C)       |
| 2681        | CakSNP2681     | <i>Kabuli</i>    | <i>Ca_Kabuli_Chr02</i>       | 24101371                       | (C/T)       |
| 2682        | CakSNP2682     | <i>Kabuli</i>    | <i>Ca_Kabuli_Chr02</i>       | 24164335                       | (A/T)       |
| 2683        | CakSNP2683     | <i>Kabuli</i>    | <i>Ca_Kabuli_Chr02</i>       | 24164840                       | (T/A)       |
| 2684        | CakSNP2684     | <i>Kabuli</i>    | <i>Ca_Kabuli_Chr02</i>       | 24164903                       | (T/C)       |
| 2685        | CakSNP2685     | <i>Kabuli</i>    | <i>Ca_Kabuli_Chr02</i>       | 24164900                       | (A/T)       |
| 2686        | CakSNP2686     | <i>Kabuli</i>    | <i>Ca_Kabuli_Chr02</i>       | 24221498                       | (G/T)       |
| 2687        | CakSNP2687     | <i>Kabuli</i>    | <i>Ca_Kabuli_Chr02</i>       | 24291665                       | (T/C)       |
| 2688        | CakSNP2688     | <i>Kabuli</i>    | <i>Ca_Kabuli_Chr02</i>       | 24353303                       | (A/G)       |
| 2689        | CakSNP2689     | <i>Kabuli</i>    | <i>Ca_Kabuli_Chr02</i>       | 24353243                       | (A/T)       |

| <b>S.N.</b> | <b>SNP IDs</b> | <b>Cultivars</b> | <b>Chromosomes/scaffolds</b> | <b>Physical positions (bp)</b> | <b>SNPs</b> |
|-------------|----------------|------------------|------------------------------|--------------------------------|-------------|
| 2690        | CakSNP2690     | <i>Kabuli</i>    | <i>Ca_Kabuli_Chr02</i>       | 24511053                       | (G/A)       |
| 2691        | CakSNP2691     | <i>Kabuli</i>    | <i>Ca_Kabuli_Chr02</i>       | 24511114                       | (G/A)       |
| 2692        | CakSNP2692     | <i>Kabuli</i>    | <i>Ca_Kabuli_Chr02</i>       | 24511121                       | (G/A)       |
| 2693        | CakSNP2693     | <i>Kabuli</i>    | <i>Ca_Kabuli_Chr02</i>       | 24511119                       | (T/G)       |
| 2694        | CakSNP2694     | <i>Kabuli</i>    | <i>Ca_Kabuli_Chr02</i>       | 24511116                       | (C/A)       |
| 2695        | CakSNP2695     | <i>Kabuli</i>    | <i>Ca_Kabuli_Chr02</i>       | 24586360                       | (T/C)       |
| 2696        | CakSNP2696     | <i>Kabuli</i>    | <i>Ca_Kabuli_Chr02</i>       | 24709014                       | (C/G)       |
| 2697        | CakSNP2697     | <i>Kabuli</i>    | <i>Ca_Kabuli_Chr02</i>       | 24709103                       | (G/A)       |
| 2698        | CakSNP2698     | <i>Kabuli</i>    | <i>Ca_Kabuli_Chr02</i>       | 24709139                       | (A/G)       |
| 2699        | CakSNP2699     | <i>Kabuli</i>    | <i>Ca_Kabuli_Chr02</i>       | 24709159                       | (T/A)       |
| 2700        | CakSNP2700     | <i>Kabuli</i>    | <i>Ca_Kabuli_Chr02</i>       | 24709295                       | (G/A)       |
| 2701        | CakSNP2701     | <i>Kabuli</i>    | <i>Ca_Kabuli_Chr02</i>       | 24741195                       | (C/T)       |
| 2702        | CakSNP2702     | <i>Kabuli</i>    | <i>Ca_Kabuli_Chr02</i>       | 24744726                       | (A/T)       |
| 2703        | CakSNP2703     | <i>Kabuli</i>    | <i>Ca_Kabuli_Chr02</i>       | 24817957                       | (G/A)       |
| 2704        | CakSNP2704     | <i>Kabuli</i>    | <i>Ca_Kabuli_Chr02</i>       | 24817945                       | (C/T)       |
| 2705        | CakSNP2705     | <i>Kabuli</i>    | <i>Ca_Kabuli_Chr02</i>       | 24817940                       | (G/A)       |
| 2706        | CakSNP2706     | <i>Kabuli</i>    | <i>Ca_Kabuli_Chr02</i>       | 24817934                       | (A/G)       |
| 2707        | CakSNP2707     | <i>Kabuli</i>    | <i>Ca_Kabuli_Chr02</i>       | 24817921                       | (G/A)       |
| 2708        | CakSNP2708     | <i>Kabuli</i>    | <i>Ca_Kabuli_Chr02</i>       | 24876355                       | (T/G)       |
| 2709        | CakSNP2709     | <i>Kabuli</i>    | <i>Ca_Kabuli_Chr02</i>       | 24911080                       | (T/C)       |
| 2710        | CakSNP2710     | <i>Kabuli</i>    | <i>Ca_Kabuli_Chr02</i>       | 24911154                       | (G/C)       |
| 2711        | CakSNP2711     | <i>Kabuli</i>    | <i>Ca_Kabuli_Chr02</i>       | 25022971                       | (A/G)       |
| 2712        | CakSNP2712     | <i>Kabuli</i>    | <i>Ca_Kabuli_Chr02</i>       | 25104319                       | (G/T)       |
| 2713        | CakSNP2713     | <i>Kabuli</i>    | <i>Ca_Kabuli_Chr02</i>       | 25104291                       | (A/T)       |
| 2714        | CakSNP2714     | <i>Kabuli</i>    | <i>Ca_Kabuli_Chr02</i>       | 25108249                       | (T/C)       |
| 2715        | CakSNP2715     | <i>Kabuli</i>    | <i>Ca_Kabuli_Chr02</i>       | 25126798                       | (C/T)       |
| 2716        | CakSNP2716     | <i>Kabuli</i>    | <i>Ca_Kabuli_Chr02</i>       | 25126804                       | (A/G)       |
| 2717        | CakSNP2717     | <i>Kabuli</i>    | <i>Ca_Kabuli_Chr02</i>       | 25126837                       | (G/T)       |
| 2718        | CakSNP2718     | <i>Kabuli</i>    | <i>Ca_Kabuli_Chr02</i>       | 25126910                       | (G/C)       |
| 2719        | CakSNP2719     | <i>Kabuli</i>    | <i>Ca_Kabuli_Chr02</i>       | 25163062                       | (C/G)       |
| 2720        | CakSNP2720     | <i>Kabuli</i>    | <i>Ca_Kabuli_Chr02</i>       | 25194583                       | (G/A)       |
| 2721        | CakSNP2721     | <i>Kabuli</i>    | <i>Ca_Kabuli_Chr02</i>       | 25317391                       | (A/G)       |
| 2722        | CakSNP2722     | <i>Kabuli</i>    | <i>Ca_Kabuli_Chr02</i>       | 25321993                       | (C/A)       |
| 2723        | CakSNP2723     | <i>Kabuli</i>    | <i>Ca_Kabuli_Chr02</i>       | 25493973                       | (T/G)       |
| 2724        | CakSNP2724     | <i>Kabuli</i>    | <i>Ca_Kabuli_Chr02</i>       | 25507637                       | (C/G)       |
| 2725        | CakSNP2725     | <i>Kabuli</i>    | <i>Ca_Kabuli_Chr02</i>       | 25507681                       | (A/G)       |
| 2726        | CakSNP2726     | <i>Kabuli</i>    | <i>Ca_Kabuli_Chr02</i>       | 25508579                       | (C/A)       |
| 2727        | CakSNP2727     | <i>Kabuli</i>    | <i>Ca_Kabuli_Chr02</i>       | 25508679                       | (A/G)       |
| 2728        | CakSNP2728     | <i>Kabuli</i>    | <i>Ca_Kabuli_Chr02</i>       | 25508660                       | (G/C)       |

| <b>S.N.</b> | <b>SNP IDs</b> | <b>Cultivars</b> | <b>Chromosomes/scaffolds</b> | <b>Physical positions (bp)</b> | <b>SNPs</b> |
|-------------|----------------|------------------|------------------------------|--------------------------------|-------------|
| 2729        | CakSNP2729     | Kabuli           | Ca_Kabuli_Chr02              | 25508920                       | (G/A)       |
| 2730        | CakSNP2730     | Kabuli           | Ca_Kabuli_Chr02              | 25508969                       | (T/C)       |
| 2731        | CakSNP2731     | Kabuli           | Ca_Kabuli_Chr02              | 25508964                       | (A/C)       |
| 2732        | CakSNP2732     | Kabuli           | Ca_Kabuli_Chr02              | 25508963                       | (A/G)       |
| 2733        | CakSNP2733     | Kabuli           | Ca_Kabuli_Chr02              | 25508935                       | (A/T)       |
| 2734        | CakSNP2734     | Kabuli           | Ca_Kabuli_Chr02              | 25509087                       | (C/A)       |
| 2735        | CakSNP2735     | Kabuli           | Ca_Kabuli_Chr02              | 25509093                       | (C/G)       |
| 2736        | CakSNP2736     | Kabuli           | Ca_Kabuli_Chr02              | 25509095                       | (G/A)       |
| 2737        | CakSNP2737     | Kabuli           | Ca_Kabuli_Chr02              | 25509203                       | (T/C)       |
| 2738        | CakSNP2738     | Kabuli           | Ca_Kabuli_Chr02              | 25509202                       | (T/A)       |
| 2739        | CakSNP2739     | Kabuli           | Ca_Kabuli_Chr02              | 25667417                       | (G/C)       |
| 2740        | CakSNP2740     | Kabuli           | Ca_Kabuli_Chr02              | 25667427                       | (T/C)       |
| 2741        | CakSNP2741     | Kabuli           | Ca_Kabuli_Chr02              | 25788124                       | (T/A)       |
| 2742        | CakSNP2742     | Kabuli           | Ca_Kabuli_Chr02              | 25788139                       | (T/C)       |
| 2743        | CakSNP2743     | Kabuli           | Ca_Kabuli_Chr02              | 25880318                       | (T/C)       |
| 2744        | CakSNP2744     | Kabuli           | Ca_Kabuli_Chr02              | 25898931                       | (T/C)       |
| 2745        | CakSNP2745     | Kabuli           | Ca_Kabuli_Chr02              | 25930490                       | (G/A)       |
| 2746        | CakSNP2746     | Kabuli           | Ca_Kabuli_Chr02              | 26051667                       | (T/G)       |
| 2747        | CakSNP2747     | Kabuli           | Ca_Kabuli_Chr02              | 26092881                       | (C/G)       |
| 2748        | CakSNP2748     | Kabuli           | Ca_Kabuli_Chr02              | 26092913                       | (C/A)       |
| 2749        | CakSNP2749     | Kabuli           | Ca_Kabuli_Chr02              | 26092928                       | (T/G)       |
| 2750        | CakSNP2750     | Kabuli           | Ca_Kabuli_Chr02              | 26092991                       | (T/C)       |
| 2751        | CakSNP2751     | Kabuli           | Ca_Kabuli_Chr02              | 26121495                       | (A/C)       |
| 2752        | CakSNP2752     | Kabuli           | Ca_Kabuli_Chr02              | 26121491                       | (T/G)       |
| 2753        | CakSNP2753     | Kabuli           | Ca_Kabuli_Chr02              | 26417311                       | (T/A)       |
| 2754        | CakSNP2754     | Kabuli           | Ca_Kabuli_Chr02              | 26417281                       | (A/G)       |
| 2755        | CakSNP2755     | Kabuli           | Ca_Kabuli_Chr02              | 26417256                       | (T/C)       |
| 2756        | CakSNP2756     | Kabuli           | Ca_Kabuli_Chr02              | 26431061                       | (T/C)       |
| 2757        | CakSNP2757     | Kabuli           | Ca_Kabuli_Chr02              | 26431058                       | (G/C)       |
| 2758        | CakSNP2758     | Kabuli           | Ca_Kabuli_Chr02              | 26431052                       | (T/C)       |
| 2759        | CakSNP2759     | Kabuli           | Ca_Kabuli_Chr02              | 26461867                       | (C/G)       |
| 2760        | CakSNP2760     | Kabuli           | Ca_Kabuli_Chr02              | 26461986                       | (A/C)       |
| 2761        | CakSNP2761     | Kabuli           | Ca_Kabuli_Chr02              | 26461960                       | (T/A)       |
| 2762        | CakSNP2762     | Kabuli           | Ca_Kabuli_Chr02              | 26486049                       | (G/A)       |
| 2763        | CakSNP2763     | Kabuli           | Ca_Kabuli_Chr02              | 26486065                       | (C/T)       |
| 2764        | CakSNP2764     | Kabuli           | Ca_Kabuli_Chr02              | 26486109                       | (T/C)       |
| 2765        | CakSNP2765     | Kabuli           | Ca_Kabuli_Chr02              | 26502153                       | (T/C)       |
| 2766        | CakSNP2766     | Kabuli           | Ca_Kabuli_Chr02              | 26503262                       | (C/A)       |
| 2767        | CakSNP2767     | Kabuli           | Ca_Kabuli_Chr02              | 26567088                       | (T/C)       |



| <b>S.N.</b> | <b>SNP IDs</b> | <b>Cultivars</b> | <b>Chromosomes/scaffolds</b> | <b>Physical positions (bp)</b> | <b>SNPs</b> |
|-------------|----------------|------------------|------------------------------|--------------------------------|-------------|
| 2768        | CakSNP2768     | Kabuli           | Ca_Kabuli_Ch02               | 26585842                       | (T/A)       |
| 2769        | CakSNP2769     | Kabuli           | Ca_Kabuli_Ch02               | 26601337                       | (C/A)       |
| 2770        | CakSNP2770     | Kabuli           | Ca_Kabuli_Ch02               | 26601331                       | (G/C)       |
| 2771        | CakSNP2771     | Kabuli           | Ca_Kabuli_Ch02               | 26706849                       | (A/G)       |
| 2772        | CakSNP2772     | Kabuli           | Ca_Kabuli_Ch02               | 27057582                       | (C/T)       |
| 2773        | CakSNP2773     | Kabuli           | Ca_Kabuli_Ch02               | 27063749                       | (C/A)       |
| 2774        | CakSNP2774     | Kabuli           | Ca_Kabuli_Ch02               | 27134574                       | (A/G)       |
| 2775        | CakSNP2775     | Kabuli           | Ca_Kabuli_Ch02               | 27134560                       | (G/T)       |
| 2776        | CakSNP2776     | Kabuli           | Ca_Kabuli_Ch02               | 27182855                       | (T/C)       |
| 2777        | CakSNP2777     | Kabuli           | Ca_Kabuli_Ch02               | 27317272                       | (A/T)       |
| 2778        | CakSNP2778     | Kabuli           | Ca_Kabuli_Ch02               | 27374064                       | (A/T)       |
| 2779        | CakSNP2779     | Kabuli           | Ca_Kabuli_Ch02               | 27374094                       | (C/A)       |
| 2780        | CakSNP2780     | Kabuli           | Ca_Kabuli_Ch02               | 27377809                       | (T/G)       |
| 2781        | CakSNP2781     | Kabuli           | Ca_Kabuli_Ch02               | 27623258                       | (A/G)       |
| 2782        | CakSNP2782     | Kabuli           | Ca_Kabuli_Ch02               | 27703356                       | (G/A)       |
| 2783        | CakSNP2783     | Kabuli           | Ca_Kabuli_Ch02               | 27724425                       | (G/T)       |
| 2784        | CakSNP2784     | Kabuli           | Ca_Kabuli_Ch02               | 27757490                       | (T/C)       |
| 2785        | CakSNP2785     | Kabuli           | Ca_Kabuli_Ch02               | 27757824                       | (A/G)       |
| 2786        | CakSNP2786     | Kabuli           | Ca_Kabuli_Ch02               | 27757804                       | (A/G)       |
| 2787        | CakSNP2787     | Kabuli           | Ca_Kabuli_Ch02               | 27757795                       | (T/G)       |
| 2788        | CakSNP2788     | Kabuli           | Ca_Kabuli_Ch02               | 27758057                       | (C/T)       |
| 2789        | CakSNP2789     | Kabuli           | Ca_Kabuli_Ch02               | 27758058                       | (A/G)       |
| 2790        | CakSNP2790     | Kabuli           | Ca_Kabuli_Ch02               | 27758065                       | (C/G)       |
| 2791        | CakSNP2791     | Kabuli           | Ca_Kabuli_Ch02               | 27758093                       | (C/T)       |
| 2792        | CakSNP2792     | Kabuli           | Ca_Kabuli_Ch02               | 27766561                       | (T/A)       |
| 2793        | CakSNP2793     | Kabuli           | Ca_Kabuli_Ch02               | 27766623                       | (T/C)       |
| 2794        | CakSNP2794     | Kabuli           | Ca_Kabuli_Ch02               | 27766605                       | (A/C)       |
| 2795        | CakSNP2795     | Kabuli           | Ca_Kabuli_Ch02               | 27766594                       | (C/A)       |
| 2796        | CakSNP2796     | Kabuli           | Ca_Kabuli_Ch02               | 27807994                       | (A/G)       |
| 2797        | CakSNP2797     | Kabuli           | Ca_Kabuli_Ch02               | 27808070                       | (G/A)       |
| 2798        | CakSNP2798     | Kabuli           | Ca_Kabuli_Ch02               | 27824962                       | (G/A)       |
| 2799        | CakSNP2799     | Kabuli           | Ca_Kabuli_Ch02               | 27831340                       | (A/C)       |
| 2800        | CakSNP2800     | Kabuli           | Ca_Kabuli_Ch02               | 27831398                       | (A/G)       |
| 2801        | CakSNP2801     | Kabuli           | Ca_Kabuli_Ch02               | 27835871                       | (G/A)       |
| 2802        | CakSNP2802     | Kabuli           | Ca_Kabuli_Ch02               | 27835850                       | (G/A)       |
| 2803        | CakSNP2803     | Kabuli           | Ca_Kabuli_Ch02               | 27835843                       | (C/A)       |
| 2804        | CakSNP2804     | Kabuli           | Ca_Kabuli_Ch02               | 27835837                       | (C/T)       |
| 2805        | CakSNP2805     | Kabuli           | Ca_Kabuli_Ch02               | 27835832                       | (C/T)       |
| 2806        | CakSNP2806     | Kabuli           | Ca_Kabuli_Ch02               | 27847670                       | (A/C)       |

| <b>S.N.</b> | <b>SNP IDs</b> | <b>Cultivars</b> | <b>Chromosomes/scaffolds</b> | <b>Physical positions (bp)</b> | <b>SNPs</b> |
|-------------|----------------|------------------|------------------------------|--------------------------------|-------------|
| 2807        | CakSNP2807     | <i>Kabuli</i>    | <i>Ca_Kabuli_Chr02</i>       | 28017163                       | (A/G)       |
| 2808        | CakSNP2808     | <i>Kabuli</i>    | <i>Ca_Kabuli_Chr02</i>       | 28018158                       | (T/C)       |
| 2809        | CakSNP2809     | <i>Kabuli</i>    | <i>Ca_Kabuli_Chr02</i>       | 28060867                       | (T/G)       |
| 2810        | CakSNP2810     | <i>Kabuli</i>    | <i>Ca_Kabuli_Chr02</i>       | 28060850                       | (A/G)       |
| 2811        | CakSNP2811     | <i>Kabuli</i>    | <i>Ca_Kabuli_Chr02</i>       | 28060879                       | (C/T)       |
| 2812        | CakSNP2812     | <i>Kabuli</i>    | <i>Ca_Kabuli_Chr02</i>       | 28060896                       | (T/C)       |
| 2813        | CakSNP2813     | <i>Kabuli</i>    | <i>Ca_Kabuli_Chr02</i>       | 28060921                       | (C/T)       |
| 2814        | CakSNP2814     | <i>Kabuli</i>    | <i>Ca_Kabuli_Chr02</i>       | 28060922                       | (A/G)       |
| 2815        | CakSNP2815     | <i>Kabuli</i>    | <i>Ca_Kabuli_Chr02</i>       | 28060928                       | (C/T)       |
| 2816        | CakSNP2816     | <i>Kabuli</i>    | <i>Ca_Kabuli_Chr02</i>       | 28060930                       | (T/G)       |
| 2817        | CakSNP2817     | <i>Kabuli</i>    | <i>Ca_Kabuli_Chr02</i>       | 28060940                       | (C/T)       |
| 2818        | CakSNP2818     | <i>Kabuli</i>    | <i>Ca_Kabuli_Chr02</i>       | 28061049                       | (G/T)       |
| 2819        | CakSNP2819     | <i>Kabuli</i>    | <i>Ca_Kabuli_Chr02</i>       | 28076664                       | (C/T)       |
| 2820        | CakSNP2820     | <i>Kabuli</i>    | <i>Ca_Kabuli_Chr02</i>       | 28076834                       | (C/T)       |
| 2821        | CakSNP2821     | <i>Kabuli</i>    | <i>Ca_Kabuli_Chr02</i>       | 28076851                       | (G/A)       |
| 2822        | CakSNP2822     | <i>Kabuli</i>    | <i>Ca_Kabuli_Chr02</i>       | 28084910                       | (C/T)       |
| 2823        | CakSNP2823     | <i>Kabuli</i>    | <i>Ca_Kabuli_Chr02</i>       | 28084913                       | (C/A)       |
| 2824        | CakSNP2824     | <i>Kabuli</i>    | <i>Ca_Kabuli_Chr02</i>       | 28084953                       | (C/T)       |
| 2825        | CakSNP2825     | <i>Kabuli</i>    | <i>Ca_Kabuli_Chr02</i>       | 28229031                       | (G/A)       |
| 2826        | CakSNP2826     | <i>Kabuli</i>    | <i>Ca_Kabuli_Chr02</i>       | 28229046                       | (G/A)       |
| 2827        | CakSNP2827     | <i>Kabuli</i>    | <i>Ca_Kabuli_Chr02</i>       | 28324577                       | (T/A)       |
| 2828        | CakSNP2828     | <i>Kabuli</i>    | <i>Ca_Kabuli_Chr02</i>       | 28352533                       | (C/A)       |
| 2829        | CakSNP2829     | <i>Kabuli</i>    | <i>Ca_Kabuli_Chr02</i>       | 28407316                       | (T/C)       |
| 2830        | CakSNP2830     | <i>Kabuli</i>    | <i>Ca_Kabuli_Chr02</i>       | 28407324                       | (C/T)       |
| 2831        | CakSNP2831     | <i>Kabuli</i>    | <i>Ca_Kabuli_Chr02</i>       | 28534235                       | (T/C)       |
| 2832        | CakSNP2832     | <i>Kabuli</i>    | <i>Ca_Kabuli_Chr02</i>       | 28699149                       | (C/T)       |
| 2833        | CakSNP2833     | <i>Kabuli</i>    | <i>Ca_Kabuli_Chr02</i>       | 28699178                       | (T/C)       |
| 2834        | CakSNP2834     | <i>Kabuli</i>    | <i>Ca_Kabuli_Chr02</i>       | 28699185                       | (C/A)       |
| 2835        | CakSNP2835     | <i>Kabuli</i>    | <i>Ca_Kabuli_Chr02</i>       | 28699219                       | (T/G)       |
| 2836        | CakSNP2836     | <i>Kabuli</i>    | <i>Ca_Kabuli_Chr02</i>       | 28699229                       | (C/T)       |
| 2837        | CakSNP2837     | <i>Kabuli</i>    | <i>Ca_Kabuli_Chr02</i>       | 28699276                       | (T/C)       |
| 2838        | CakSNP2838     | <i>Kabuli</i>    | <i>Ca_Kabuli_Chr02</i>       | 28699383                       | (A/T)       |
| 2839        | CakSNP2839     | <i>Kabuli</i>    | <i>Ca_Kabuli_Chr02</i>       | 28699403                       | (C/T)       |
| 2840        | CakSNP2840     | <i>Kabuli</i>    | <i>Ca_Kabuli_Chr02</i>       | 28699414                       | (C/T)       |
| 2841        | CakSNP2841     | <i>Kabuli</i>    | <i>Ca_Kabuli_Chr02</i>       | 28699579                       | (A/C)       |
| 2842        | CakSNP2842     | <i>Kabuli</i>    | <i>Ca_Kabuli_Chr02</i>       | 28701724                       | (A/G)       |
| 2843        | CakSNP2843     | <i>Kabuli</i>    | <i>Ca_Kabuli_Chr02</i>       | 28741764                       | (T/C)       |
| 2844        | CakSNP2844     | <i>Kabuli</i>    | <i>Ca_Kabuli_Chr02</i>       | 28931402                       | (T/C)       |
| 2845        | CakSNP2845     | <i>Kabuli</i>    | <i>Ca_Kabuli_Chr02</i>       | 28931340                       | (T/C)       |

| <b>S.N.</b> | <b>SNP IDs</b> | <b>Cultivars</b> | <b>Chromosomes/scaffolds</b> | <b>Physical positions (bp)</b> | <b>SNPs</b> |
|-------------|----------------|------------------|------------------------------|--------------------------------|-------------|
| 2846        | CakSNP2846     | <i>Kabuli</i>    | <i>Ca_Kabuli_Chr02</i>       | 28944712                       | (T/C)       |
| 2847        | CakSNP2847     | <i>Kabuli</i>    | <i>Ca_Kabuli_Chr02</i>       | 28944707                       | (A/C)       |
| 2848        | CakSNP2848     | <i>Kabuli</i>    | <i>Ca_Kabuli_Chr02</i>       | 28949900                       | (C/T)       |
| 2849        | CakSNP2849     | <i>Kabuli</i>    | <i>Ca_Kabuli_Chr02</i>       | 28949909                       | (G/A)       |
| 2850        | CakSNP2850     | <i>Kabuli</i>    | <i>Ca_Kabuli_Chr02</i>       | 28949911                       | (A/C)       |
| 2851        | CakSNP2851     | <i>Kabuli</i>    | <i>Ca_Kabuli_Chr02</i>       | 28949919                       | (A/T)       |
| 2852        | CakSNP2852     | <i>Kabuli</i>    | <i>Ca_Kabuli_Chr02</i>       | 28949954                       | (T/A)       |
| 2853        | CakSNP2853     | <i>Kabuli</i>    | <i>Ca_Kabuli_Chr02</i>       | 28949948                       | (A/G)       |
| 2854        | CakSNP2854     | <i>Kabuli</i>    | <i>Ca_Kabuli_Chr02</i>       | 28970621                       | (A/G)       |
| 2855        | CakSNP2855     | <i>Kabuli</i>    | <i>Ca_Kabuli_Chr02</i>       | 28970618                       | (A/G)       |
| 2856        | CakSNP2856     | <i>Kabuli</i>    | <i>Ca_Kabuli_Chr02</i>       | 29103993                       | (T/C)       |
| 2857        | CakSNP2857     | <i>Kabuli</i>    | <i>Ca_Kabuli_Chr02</i>       | 29103970                       | (C/T)       |
| 2858        | CakSNP2858     | <i>Kabuli</i>    | <i>Ca_Kabuli_Chr02</i>       | 29122581                       | (G/A)       |
| 2859        | CakSNP2859     | <i>Kabuli</i>    | <i>Ca_Kabuli_Chr02</i>       | 29122589                       | (T/G)       |
| 2860        | CakSNP2860     | <i>Kabuli</i>    | <i>Ca_Kabuli_Chr02</i>       | 29592666                       | (G/A)       |
| 2861        | CakSNP2861     | <i>Kabuli</i>    | <i>Ca_Kabuli_Chr02</i>       | 29592694                       | (T/C)       |
| 2862        | CakSNP2862     | <i>Kabuli</i>    | <i>Ca_Kabuli_Chr02</i>       | 29601458                       | (C/T)       |
| 2863        | CakSNP2863     | <i>Kabuli</i>    | <i>Ca_Kabuli_Chr02</i>       | 29601463                       | (C/T)       |
| 2864        | CakSNP2864     | <i>Kabuli</i>    | <i>Ca_Kabuli_Chr02</i>       | 29614370                       | (C/T)       |
| 2865        | CakSNP2865     | <i>Kabuli</i>    | <i>Ca_Kabuli_Chr02</i>       | 29614375                       | (C/T)       |
| 2866        | CakSNP2866     | <i>Kabuli</i>    | <i>Ca_Kabuli_Chr02</i>       | 29693107                       | (A/G)       |
| 2867        | CakSNP2867     | <i>Kabuli</i>    | <i>Ca_Kabuli_Chr02</i>       | 29948356                       | (G/A)       |
| 2868        | CakSNP2868     | <i>Kabuli</i>    | <i>Ca_Kabuli_Chr02</i>       | 29960049                       | (G/A)       |
| 2869        | CakSNP2869     | <i>Kabuli</i>    | <i>Ca_Kabuli_Chr02</i>       | 29960054                       | (G/A)       |
| 2870        | CakSNP2870     | <i>Kabuli</i>    | <i>Ca_Kabuli_Chr02</i>       | 29960130                       | (C/T)       |
| 2871        | CakSNP2871     | <i>Kabuli</i>    | <i>Ca_Kabuli_Chr02</i>       | 30042255                       | (A/C)       |
| 2872        | CakSNP2872     | <i>Kabuli</i>    | <i>Ca_Kabuli_Chr02</i>       | 30042309                       | (T/G)       |
| 2873        | CakSNP2873     | <i>Kabuli</i>    | <i>Ca_Kabuli_Chr02</i>       | 30042302                       | (A/T)       |
| 2874        | CakSNP2874     | <i>Kabuli</i>    | <i>Ca_Kabuli_Chr02</i>       | 30042297                       | (C/T)       |
| 2875        | CakSNP2875     | <i>Kabuli</i>    | <i>Ca_Kabuli_Chr02</i>       | 30042267                       | (C/T)       |
| 2876        | CakSNP2876     | <i>Kabuli</i>    | <i>Ca_Kabuli_Chr02</i>       | 30045338                       | (C/G)       |
| 2877        | CakSNP2877     | <i>Kabuli</i>    | <i>Ca_Kabuli_Chr02</i>       | 30091313                       | (G/A)       |
| 2878        | CakSNP2878     | <i>Kabuli</i>    | <i>Ca_Kabuli_Chr02</i>       | 30091311                       | (C/T)       |
| 2879        | CakSNP2879     | <i>Kabuli</i>    | <i>Ca_Kabuli_Chr02</i>       | 30091308                       | (A/T)       |
| 2880        | CakSNP2880     | <i>Kabuli</i>    | <i>Ca_Kabuli_Chr02</i>       | 30091307                       | (C/T)       |
| 2881        | CakSNP2881     | <i>Kabuli</i>    | <i>Ca_Kabuli_Chr02</i>       | 30091295                       | (T/A)       |
| 2882        | CakSNP2882     | <i>Kabuli</i>    | <i>Ca_Kabuli_Chr02</i>       | 30091290                       | (T/C)       |
| 2883        | CakSNP2883     | <i>Kabuli</i>    | <i>Ca_Kabuli_Chr02</i>       | 30091286                       | (G/A)       |
| 2884        | CakSNP2884     | <i>Kabuli</i>    | <i>Ca_Kabuli_Chr02</i>       | 30091284                       | (A/C)       |

| <b>S.N.</b> | <b>SNP IDs</b> | <b>Cultivars</b> | <b>Chromosomes/scaffolds</b> | <b>Physical positions (bp)</b> | <b>SNPs</b> |
|-------------|----------------|------------------|------------------------------|--------------------------------|-------------|
| 2885        | CakSNP2885     | <i>Kabuli</i>    | <i>Ca_Kabuli_Chr02</i>       | 30091280                       | (C/G)       |
| 2886        | CakSNP2886     | <i>Kabuli</i>    | <i>Ca_Kabuli_Chr02</i>       | 30133162                       | (G/A)       |
| 2887        | CakSNP2887     | <i>Kabuli</i>    | <i>Ca_Kabuli_Chr02</i>       | 30133189                       | (G/A)       |
| 2888        | CakSNP2888     | <i>Kabuli</i>    | <i>Ca_Kabuli_Chr02</i>       | 30133215                       | (G/T)       |
| 2889        | CakSNP2889     | <i>Kabuli</i>    | <i>Ca_Kabuli_Chr02</i>       | 30133221                       | (A/T)       |
| 2890        | CakSNP2890     | <i>Kabuli</i>    | <i>Ca_Kabuli_Chr02</i>       | 30335160                       | (T/C)       |
| 2891        | CakSNP2891     | <i>Kabuli</i>    | <i>Ca_Kabuli_Chr02</i>       | 30335212                       | (T/A)       |
| 2892        | CakSNP2892     | <i>Kabuli</i>    | <i>Ca_Kabuli_Chr02</i>       | 30335194                       | (A/G)       |
| 2893        | CakSNP2893     | <i>Kabuli</i>    | <i>Ca_Kabuli_Chr02</i>       | 30363957                       | (C/A)       |
| 2894        | CakSNP2894     | <i>Kabuli</i>    | <i>Ca_Kabuli_Chr02</i>       | 30364073                       | (T/A)       |
| 2895        | CakSNP2895     | <i>Kabuli</i>    | <i>Ca_Kabuli_Chr02</i>       | 30364042                       | (A/G)       |
| 2896        | CakSNP2896     | <i>Kabuli</i>    | <i>Ca_Kabuli_Chr02</i>       | 30364025                       | (T/C)       |
| 2897        | CakSNP2897     | <i>Kabuli</i>    | <i>Ca_Kabuli_Chr02</i>       | 30370013                       | (C/A)       |
| 2898        | CakSNP2898     | <i>Kabuli</i>    | <i>Ca_Kabuli_Chr02</i>       | 30370003                       | (A/C)       |
| 2899        | CakSNP2899     | <i>Kabuli</i>    | <i>Ca_Kabuli_Chr02</i>       | 30370411                       | (T/C)       |
| 2900        | CakSNP2900     | <i>Kabuli</i>    | <i>Ca_Kabuli_Chr02</i>       | 30467552                       | (C/T)       |
| 2901        | CakSNP2901     | <i>Kabuli</i>    | <i>Ca_Kabuli_Chr02</i>       | 30467551                       | (A/T)       |
| 2902        | CakSNP2902     | <i>Kabuli</i>    | <i>Ca_Kabuli_Chr02</i>       | 30508454                       | (T/C)       |
| 2903        | CakSNP2903     | <i>Kabuli</i>    | <i>Ca_Kabuli_Chr02</i>       | 30530642                       | (A/T)       |
| 2904        | CakSNP2904     | <i>Kabuli</i>    | <i>Ca_Kabuli_Chr02</i>       | 30537667                       | (A/T)       |
| 2905        | CakSNP2905     | <i>Kabuli</i>    | <i>Ca_Kabuli_Chr02</i>       | 30537673                       | (A/G)       |
| 2906        | CakSNP2906     | <i>Kabuli</i>    | <i>Ca_Kabuli_Chr02</i>       | 30537687                       | (T/C)       |
| 2907        | CakSNP2907     | <i>Kabuli</i>    | <i>Ca_Kabuli_Chr02</i>       | 30537701                       | (T/A)       |
| 2908        | CakSNP2908     | <i>Kabuli</i>    | <i>Ca_Kabuli_Chr02</i>       | 30537953                       | (T/C)       |
| 2909        | CakSNP2909     | <i>Kabuli</i>    | <i>Ca_Kabuli_Chr02</i>       | 30614086                       | (C/T)       |
| 2910        | CakSNP2910     | <i>Kabuli</i>    | <i>Ca_Kabuli_Chr02</i>       | 30686920                       | (C/T)       |
| 2911        | CakSNP2911     | <i>Kabuli</i>    | <i>Ca_Kabuli_Chr02</i>       | 30702121                       | (T/C)       |
| 2912        | CakSNP2912     | <i>Kabuli</i>    | <i>Ca_Kabuli_Chr02</i>       | 30702090                       | (G/A)       |
| 2913        | CakSNP2913     | <i>Kabuli</i>    | <i>Ca_Kabuli_Chr02</i>       | 30867547                       | (G/A)       |
| 2914        | CakSNP2914     | <i>Kabuli</i>    | <i>Ca_Kabuli_Chr02</i>       | 30880148                       | (A/G)       |
| 2915        | CakSNP2915     | <i>Kabuli</i>    | <i>Ca_Kabuli_Chr02</i>       | 30880243                       | (G/C)       |
| 2916        | CakSNP2916     | <i>Kabuli</i>    | <i>Ca_Kabuli_Chr02</i>       | 30880246                       | (G/A)       |
| 2917        | CakSNP2917     | <i>Kabuli</i>    | <i>Ca_Kabuli_Chr02</i>       | 30880303                       | (T/A)       |
| 2918        | CakSNP2918     | <i>Kabuli</i>    | <i>Ca_Kabuli_Chr02</i>       | 30880302                       | (T/C)       |
| 2919        | CakSNP2919     | <i>Kabuli</i>    | <i>Ca_Kabuli_Chr02</i>       | 30880282                       | (A/G)       |
| 2920        | CakSNP2920     | <i>Kabuli</i>    | <i>Ca_Kabuli_Chr02</i>       | 30921092                       | (C/A)       |
| 2921        | CakSNP2921     | <i>Kabuli</i>    | <i>Ca_Kabuli_Chr02</i>       | 30921758                       | (C/T)       |
| 2922        | CakSNP2922     | <i>Kabuli</i>    | <i>Ca_Kabuli_Chr02</i>       | 30921888                       | (T/C)       |
| 2923        | CakSNP2923     | <i>Kabuli</i>    | <i>Ca_Kabuli_Chr02</i>       | 30921882                       | (C/G)       |

| <b>S.N.</b> | <b>SNP IDs</b> | <b>Cultivars</b> | <b>Chromosomes/scaffolds</b> | <b>Physical positions (bp)</b> | <b>SNPs</b> |
|-------------|----------------|------------------|------------------------------|--------------------------------|-------------|
| 2924        | CakSNP2924     | Kabuli           | Ca_Kabuli_Ch02               | 30921917                       | (C/A)       |
| 2925        | CakSNP2925     | Kabuli           | Ca_Kabuli_Ch02               | 30921923                       | (A/G)       |
| 2926        | CakSNP2926     | Kabuli           | Ca_Kabuli_Ch02               | 30954317                       | (G/A)       |
| 2927        | CakSNP2927     | Kabuli           | Ca_Kabuli_Ch02               | 30954305                       | (T/G)       |
| 2928        | CakSNP2928     | Kabuli           | Ca_Kabuli_Ch02               | 30977572                       | (A/G)       |
| 2929        | CakSNP2929     | Kabuli           | Ca_Kabuli_Ch02               | 30977528                       | (C/T)       |
| 2930        | CakSNP2930     | Kabuli           | Ca_Kabuli_Ch02               | 30977522                       | (A/T)       |
| 2931        | CakSNP2931     | Kabuli           | Ca_Kabuli_Ch02               | 30977508                       | (A/T)       |
| 2932        | CakSNP2932     | Kabuli           | Ca_Kabuli_Ch02               | 30997769                       | (T/A)       |
| 2933        | CakSNP2933     | Kabuli           | Ca_Kabuli_Ch02               | 30997780                       | (A/C)       |
| 2934        | CakSNP2934     | Kabuli           | Ca_Kabuli_Ch02               | 30997784                       | (T/A)       |
| 2935        | CakSNP2935     | Kabuli           | Ca_Kabuli_Ch02               | 31005847                       | (T/G)       |
| 2936        | CakSNP2936     | Kabuli           | Ca_Kabuli_Ch02               | 31005845                       | (C/T)       |
| 2937        | CakSNP2937     | Kabuli           | Ca_Kabuli_Ch02               | 31014295                       | (A/T)       |
| 2938        | CakSNP2938     | Kabuli           | Ca_Kabuli_Ch02               | 31055083                       | (C/T)       |
| 2939        | CakSNP2939     | Kabuli           | Ca_Kabuli_Ch02               | 31055007                       | (G/A)       |
| 2940        | CakSNP2940     | Kabuli           | Ca_Kabuli_Ch02               | 31088681                       | (G/T)       |
| 2941        | CakSNP2941     | Kabuli           | Ca_Kabuli_Ch02               | 31088676                       | (G/C)       |
| 2942        | CakSNP2942     | Kabuli           | Ca_Kabuli_Ch02               | 31088670                       | (C/T)       |
| 2943        | CakSNP2943     | Kabuli           | Ca_Kabuli_Ch02               | 31088648                       | (A/G)       |
| 2944        | CakSNP2944     | Kabuli           | Ca_Kabuli_Ch02               | 31088645                       | (A/C)       |
| 2945        | CakSNP2945     | Kabuli           | Ca_Kabuli_Ch02               | 31088778                       | (A/T)       |
| 2946        | CakSNP2946     | Kabuli           | Ca_Kabuli_Ch02               | 31088800                       | (T/C)       |
| 2947        | CakSNP2947     | Kabuli           | Ca_Kabuli_Ch02               | 31088882                       | (A/G)       |
| 2948        | CakSNP2948     | Kabuli           | Ca_Kabuli_Ch02               | 31109311                       | (G/T)       |
| 2949        | CakSNP2949     | Kabuli           | Ca_Kabuli_Ch02               | 31109358                       | (C/T)       |
| 2950        | CakSNP2950     | Kabuli           | Ca_Kabuli_Ch02               | 31109481                       | (G/A)       |
| 2951        | CakSNP2951     | Kabuli           | Ca_Kabuli_Ch02               | 31109441                       | (C/G)       |
| 2952        | CakSNP2952     | Kabuli           | Ca_Kabuli_Ch02               | 31109435                       | (G/A)       |
| 2953        | CakSNP2953     | Kabuli           | Ca_Kabuli_Ch02               | 31109427                       | (C/T)       |
| 2954        | CakSNP2954     | Kabuli           | Ca_Kabuli_Ch02               | 31141019                       | (G/A)       |
| 2955        | CakSNP2955     | Kabuli           | Ca_Kabuli_Ch02               | 31167603                       | (G/A)       |
| 2956        | CakSNP2956     | Kabuli           | Ca_Kabuli_Ch02               | 31167594                       | (A/G)       |
| 2957        | CakSNP2957     | Kabuli           | Ca_Kabuli_Ch02               | 31188355                       | (A/G)       |
| 2958        | CakSNP2958     | Kabuli           | Ca_Kabuli_Ch02               | 31201872                       | (T/C)       |
| 2959        | CakSNP2959     | Kabuli           | Ca_Kabuli_Ch02               | 31201859                       | (T/A)       |
| 2960        | CakSNP2960     | Kabuli           | Ca_Kabuli_Ch02               | 31201795                       | (A/G)       |
| 2961        | CakSNP2961     | Kabuli           | Ca_Kabuli_Ch02               | 31203154                       | (G/A)       |
| 2962        | CakSNP2962     | Kabuli           | Ca_Kabuli_Ch02               | 31205531                       | (C/T)       |

| <b>S.N.</b> | <b>SNP IDs</b> | <b>Cultivars</b> | <b>Chromosomes/scaffolds</b> | <b>Physical positions (bp)</b> | <b>SNPs</b> |
|-------------|----------------|------------------|------------------------------|--------------------------------|-------------|
| 2963        | CakSNP2963     | <i>Kabuli</i>    | <i>Ca_Kabuli_Chr02</i>       | 31427861                       | (A/G)       |
| 2964        | CakSNP2964     | <i>Kabuli</i>    | <i>Ca_Kabuli_Chr02</i>       | 31427902                       | (G/C)       |
| 2965        | CakSNP2965     | <i>Kabuli</i>    | <i>Ca_Kabuli_Chr02</i>       | 31427915                       | (A/G)       |
| 2966        | CakSNP2966     | <i>Kabuli</i>    | <i>Ca_Kabuli_Chr02</i>       | 31428024                       | (T/G)       |
| 2967        | CakSNP2967     | <i>Kabuli</i>    | <i>Ca_Kabuli_Chr02</i>       | 31428132                       | (G/A)       |
| 2968        | CakSNP2968     | <i>Kabuli</i>    | <i>Ca_Kabuli_Chr02</i>       | 31428405                       | (T/C)       |
| 2969        | CakSNP2969     | <i>Kabuli</i>    | <i>Ca_Kabuli_Chr02</i>       | 31428429                       | (T/G)       |
| 2970        | CakSNP2970     | <i>Kabuli</i>    | <i>Ca_Kabuli_Chr02</i>       | 31534265                       | (A/C)       |
| 2971        | CakSNP2971     | <i>Kabuli</i>    | <i>Ca_Kabuli_Chr02</i>       | 31534283                       | (A/G)       |
| 2972        | CakSNP2972     | <i>Kabuli</i>    | <i>Ca_Kabuli_Chr02</i>       | 31534455                       | (T/C)       |
| 2973        | CakSNP2973     | <i>Kabuli</i>    | <i>Ca_Kabuli_Chr02</i>       | 31686714                       | (C/T)       |
| 2974        | CakSNP2974     | <i>Kabuli</i>    | <i>Ca_Kabuli_Chr02</i>       | 31686716                       | (C/T)       |
| 2975        | CakSNP2975     | <i>Kabuli</i>    | <i>Ca_Kabuli_Chr02</i>       | 31686742                       | (A/C)       |
| 2976        | CakSNP2976     | <i>Kabuli</i>    | <i>Ca_Kabuli_Chr02</i>       | 31686751                       | (A/T)       |
| 2977        | CakSNP2977     | <i>Kabuli</i>    | <i>Ca_Kabuli_Chr02</i>       | 31686758                       | (C/A)       |
| 2978        | CakSNP2978     | <i>Kabuli</i>    | <i>Ca_Kabuli_Chr02</i>       | 31686761                       | (A/C)       |
| 2979        | CakSNP2979     | <i>Kabuli</i>    | <i>Ca_Kabuli_Chr02</i>       | 31686767                       | (C/T)       |
| 2980        | CakSNP2980     | <i>Kabuli</i>    | <i>Ca_Kabuli_Chr02</i>       | 31686779                       | (G/A)       |
| 2981        | CakSNP2981     | <i>Kabuli</i>    | <i>Ca_Kabuli_Chr02</i>       | 31686820                       | (T/C)       |
| 2982        | CakSNP2982     | <i>Kabuli</i>    | <i>Ca_Kabuli_Chr02</i>       | 31756777                       | (G/T)       |
| 2983        | CakSNP2983     | <i>Kabuli</i>    | <i>Ca_Kabuli_Chr02</i>       | 31847033                       | (A/C)       |
| 2984        | CakSNP2984     | <i>Kabuli</i>    | <i>Ca_Kabuli_Chr02</i>       | 31881918                       | (G/T)       |
| 2985        | CakSNP2985     | <i>Kabuli</i>    | <i>Ca_Kabuli_Chr02</i>       | 31885934                       | (A/G)       |
| 2986        | CakSNP2986     | <i>Kabuli</i>    | <i>Ca_Kabuli_Chr02</i>       | 31908694                       | (G/A)       |
| 2987        | CakSNP2987     | <i>Kabuli</i>    | <i>Ca_Kabuli_Chr02</i>       | 31908742                       | (G/A)       |
| 2988        | CakSNP2988     | <i>Kabuli</i>    | <i>Ca_Kabuli_Chr02</i>       | 31908803                       | (C/T)       |
| 2989        | CakSNP2989     | <i>Kabuli</i>    | <i>Ca_Kabuli_Chr02</i>       | 31908787                       | (G/A)       |
| 2990        | CakSNP2990     | <i>Kabuli</i>    | <i>Ca_Kabuli_Chr02</i>       | 31908845                       | (T/A)       |
| 2991        | CakSNP2991     | <i>Kabuli</i>    | <i>Ca_Kabuli_Chr02</i>       | 31908857                       | (C/T)       |
| 2992        | CakSNP2992     | <i>Kabuli</i>    | <i>Ca_Kabuli_Chr02</i>       | 31941463                       | (T/C)       |
| 2993        | CakSNP2993     | <i>Kabuli</i>    | <i>Ca_Kabuli_Chr02</i>       | 31941554                       | (A/T)       |
| 2994        | CakSNP2994     | <i>Kabuli</i>    | <i>Ca_Kabuli_Chr02</i>       | 31975269                       | (C/T)       |
| 2995        | CakSNP2995     | <i>Kabuli</i>    | <i>Ca_Kabuli_Chr02</i>       | 32003536                       | (G/T)       |
| 2996        | CakSNP2996     | <i>Kabuli</i>    | <i>Ca_Kabuli_Chr02</i>       | 32017361                       | (G/A)       |
| 2997        | CakSNP2997     | <i>Kabuli</i>    | <i>Ca_Kabuli_Chr02</i>       | 32049523                       | (C/A)       |
| 2998        | CakSNP2998     | <i>Kabuli</i>    | <i>Ca_Kabuli_Chr02</i>       | 32049525                       | (A/C)       |
| 2999        | CakSNP2999     | <i>Kabuli</i>    | <i>Ca_Kabuli_Chr02</i>       | 32058591                       | (T/C)       |
| 3000        | CakSNP3000     | <i>Kabuli</i>    | <i>Ca_Kabuli_Chr02</i>       | 32061053                       | (C/T)       |
| 3001        | CakSNP3001     | <i>Kabuli</i>    | <i>Ca_Kabuli_Chr02</i>       | 32061054                       | (T/C)       |

| <b>S.N.</b> | <b>SNP IDs</b> | <b>Cultivars</b> | <b>Chromosomes/scaffolds</b> | <b>Physical positions (bp)</b> | <b>SNPs</b> |
|-------------|----------------|------------------|------------------------------|--------------------------------|-------------|
| 3002        | CakSNP3002     | <i>Kabuli</i>    | <i>Ca_Kabuli_Chr02</i>       | 32062010                       | (A/C)       |
| 3003        | CakSNP3003     | <i>Kabuli</i>    | <i>Ca_Kabuli_Chr02</i>       | 32071107                       | (C/G)       |
| 3004        | CakSNP3004     | <i>Kabuli</i>    | <i>Ca_Kabuli_Chr02</i>       | 32080002                       | (T/C)       |
| 3005        | CakSNP3005     | <i>Kabuli</i>    | <i>Ca_Kabuli_Chr02</i>       | 32080007                       | (T/C)       |
| 3006        | CakSNP3006     | <i>Kabuli</i>    | <i>Ca_Kabuli_Chr02</i>       | 32080010                       | (G/C)       |
| 3007        | CakSNP3007     | <i>Kabuli</i>    | <i>Ca_Kabuli_Chr02</i>       | 32080016                       | (A/T)       |
| 3008        | CakSNP3008     | <i>Kabuli</i>    | <i>Ca_Kabuli_Chr02</i>       | 32080022                       | (C/A)       |
| 3009        | CakSNP3009     | <i>Kabuli</i>    | <i>Ca_Kabuli_Chr02</i>       | 32080037                       | (A/G)       |
| 3010        | CakSNP3010     | <i>Kabuli</i>    | <i>Ca_Kabuli_Chr02</i>       | 32096192                       | (A/C)       |
| 3011        | CakSNP3011     | <i>Kabuli</i>    | <i>Ca_Kabuli_Chr02</i>       | 32096186                       | (T/A)       |
| 3012        | CakSNP3012     | <i>Kabuli</i>    | <i>Ca_Kabuli_Chr02</i>       | 32096180                       | (C/G)       |
| 3013        | CakSNP3013     | <i>Kabuli</i>    | <i>Ca_Kabuli_Chr02</i>       | 32096177                       | (C/T)       |
| 3014        | CakSNP3014     | <i>Kabuli</i>    | <i>Ca_Kabuli_Chr02</i>       | 32096172                       | (C/T)       |
| 3015        | CakSNP3015     | <i>Kabuli</i>    | <i>Ca_Kabuli_Chr02</i>       | 32099757                       | (C/T)       |
| 3016        | CakSNP3016     | <i>Kabuli</i>    | <i>Ca_Kabuli_Chr02</i>       | 32099907                       | (T/C)       |
| 3017        | CakSNP3017     | <i>Kabuli</i>    | <i>Ca_Kabuli_Chr02</i>       | 32109805                       | (G/A)       |
| 3018        | CakSNP3018     | <i>Kabuli</i>    | <i>Ca_Kabuli_Chr02</i>       | 32109811                       | (G/A)       |
| 3019        | CakSNP3019     | <i>Kabuli</i>    | <i>Ca_Kabuli_Chr02</i>       | 32109813                       | (C/T)       |
| 3020        | CakSNP3020     | <i>Kabuli</i>    | <i>Ca_Kabuli_Chr02</i>       | 32109821                       | (G/A)       |
| 3021        | CakSNP3021     | <i>Kabuli</i>    | <i>Ca_Kabuli_Chr02</i>       | 32109827                       | (T/C)       |
| 3022        | CakSNP3022     | <i>Kabuli</i>    | <i>Ca_Kabuli_Chr02</i>       | 32109859                       | (A/C)       |
| 3023        | CakSNP3023     | <i>Kabuli</i>    | <i>Ca_Kabuli_Chr02</i>       | 32109904                       | (T/A)       |
| 3024        | CakSNP3024     | <i>Kabuli</i>    | <i>Ca_Kabuli_Chr02</i>       | 32109895                       | (A/G)       |
| 3025        | CakSNP3025     | <i>Kabuli</i>    | <i>Ca_Kabuli_Chr02</i>       | 32109892                       | (T/A)       |
| 3026        | CakSNP3026     | <i>Kabuli</i>    | <i>Ca_Kabuli_Chr02</i>       | 32119094                       | (A/T)       |
| 3027        | CakSNP3027     | <i>Kabuli</i>    | <i>Ca_Kabuli_Chr02</i>       | 32119268                       | (T/A)       |
| 3028        | CakSNP3028     | <i>Kabuli</i>    | <i>Ca_Kabuli_Chr02</i>       | 32119274                       | (T/C)       |
| 3029        | CakSNP3029     | <i>Kabuli</i>    | <i>Ca_Kabuli_Chr02</i>       | 32119331                       | (A/T)       |
| 3030        | CakSNP3030     | <i>Kabuli</i>    | <i>Ca_Kabuli_Chr02</i>       | 32129272                       | (T/C)       |
| 3031        | CakSNP3031     | <i>Kabuli</i>    | <i>Ca_Kabuli_Chr02</i>       | 32129395                       | (C/G)       |
| 3032        | CakSNP3032     | <i>Kabuli</i>    | <i>Ca_Kabuli_Chr02</i>       | 32140939                       | (A/T)       |
| 3033        | CakSNP3033     | <i>Kabuli</i>    | <i>Ca_Kabuli_Chr02</i>       | 32140948                       | (A/C)       |
| 3034        | CakSNP3034     | <i>Kabuli</i>    | <i>Ca_Kabuli_Chr02</i>       | 32140987                       | (A/G)       |
| 3035        | CakSNP3035     | <i>Kabuli</i>    | <i>Ca_Kabuli_Chr02</i>       | 32141047                       | (A/G)       |
| 3036        | CakSNP3036     | <i>Kabuli</i>    | <i>Ca_Kabuli_Chr02</i>       | 32141038                       | (T/C)       |
| 3037        | CakSNP3037     | <i>Kabuli</i>    | <i>Ca_Kabuli_Chr02</i>       | 32141019                       | (G/A)       |
| 3038        | CakSNP3038     | <i>Kabuli</i>    | <i>Ca_Kabuli_Chr02</i>       | 32141013                       | (G/C)       |
| 3039        | CakSNP3039     | <i>Kabuli</i>    | <i>Ca_Kabuli_Chr02</i>       | 32141002                       | (A/T)       |
| 3040        | CakSNP3040     | <i>Kabuli</i>    | <i>Ca_Kabuli_Chr02</i>       | 32140998                       | (G/T)       |

| <b>S.N.</b> | <b>SNP IDs</b> | <b>Cultivars</b> | <b>Chromosomes/scaffolds</b> | <b>Physical positions (bp)</b> | <b>SNPs</b> |
|-------------|----------------|------------------|------------------------------|--------------------------------|-------------|
| 3041        | CakSNP3041     | <i>Kabuli</i>    | <i>Ca_Kabuli_Chr02</i>       | 32140990                       | (G/A)       |
| 3042        | CakSNP3042     | <i>Kabuli</i>    | <i>Ca_Kabuli_Chr02</i>       | 32203032                       | (A/G)       |
| 3043        | CakSNP3043     | <i>Kabuli</i>    | <i>Ca_Kabuli_Chr02</i>       | 32203036                       | (A/T)       |
| 3044        | CakSNP3044     | <i>Kabuli</i>    | <i>Ca_Kabuli_Chr02</i>       | 32242818                       | (T/G)       |
| 3045        | CakSNP3045     | <i>Kabuli</i>    | <i>Ca_Kabuli_Chr02</i>       | 32348054                       | (T/A)       |
| 3046        | CakSNP3046     | <i>Kabuli</i>    | <i>Ca_Kabuli_Chr02</i>       | 32348087                       | (A/C)       |
| 3047        | CakSNP3047     | <i>Kabuli</i>    | <i>Ca_Kabuli_Chr02</i>       | 32348119                       | (G/T)       |
| 3048        | CakSNP3048     | <i>Kabuli</i>    | <i>Ca_Kabuli_Chr02</i>       | 32348793                       | (G/A)       |
| 3049        | CakSNP3049     | <i>Kabuli</i>    | <i>Ca_Kabuli_Chr02</i>       | 32348870                       | (T/C)       |
| 3050        | CakSNP3050     | <i>Kabuli</i>    | <i>Ca_Kabuli_Chr02</i>       | 32411994                       | (G/T)       |
| 3051        | CakSNP3051     | <i>Kabuli</i>    | <i>Ca_Kabuli_Chr02</i>       | 32412000                       | (G/T)       |
| 3052        | CakSNP3052     | <i>Kabuli</i>    | <i>Ca_Kabuli_Chr02</i>       | 32481969                       | (C/T)       |
| 3053        | CakSNP3053     | <i>Kabuli</i>    | <i>Ca_Kabuli_Chr02</i>       | 32481983                       | (G/T)       |
| 3054        | CakSNP3054     | <i>Kabuli</i>    | <i>Ca_Kabuli_Chr02</i>       | 32484223                       | (C/T)       |
| 3055        | CakSNP3055     | <i>Kabuli</i>    | <i>Ca_Kabuli_Chr02</i>       | 32545320                       | (A/G)       |
| 3056        | CakSNP3056     | <i>Kabuli</i>    | <i>Ca_Kabuli_Chr02</i>       | 32545329                       | (T/C)       |
| 3057        | CakSNP3057     | <i>Kabuli</i>    | <i>Ca_Kabuli_Chr02</i>       | 32545351                       | (G/A)       |
| 3058        | CakSNP3058     | <i>Kabuli</i>    | <i>Ca_Kabuli_Chr02</i>       | 32556992                       | (T/A)       |
| 3059        | CakSNP3059     | <i>Kabuli</i>    | <i>Ca_Kabuli_Chr02</i>       | 32564427                       | (T/C)       |
| 3060        | CakSNP3060     | <i>Kabuli</i>    | <i>Ca_Kabuli_Chr02</i>       | 32564480                       | (G/A)       |
| 3061        | CakSNP3061     | <i>Kabuli</i>    | <i>Ca_Kabuli_Chr02</i>       | 32564770                       | (G/T)       |
| 3062        | CakSNP3062     | <i>Kabuli</i>    | <i>Ca_Kabuli_Chr02</i>       | 32564796                       | (A/T)       |
| 3063        | CakSNP3063     | <i>Kabuli</i>    | <i>Ca_Kabuli_Chr02</i>       | 32570394                       | (G/A)       |
| 3064        | CakSNP3064     | <i>Kabuli</i>    | <i>Ca_Kabuli_Chr02</i>       | 32570479                       | (T/G)       |
| 3065        | CakSNP3065     | <i>Kabuli</i>    | <i>Ca_Kabuli_Chr02</i>       | 32570429                       | (G/A)       |
| 3066        | CakSNP3066     | <i>Kabuli</i>    | <i>Ca_Kabuli_Chr02</i>       | 32570504                       | (G/C)       |
| 3067        | CakSNP3067     | <i>Kabuli</i>    | <i>Ca_Kabuli_Chr02</i>       | 32577274                       | (T/A)       |
| 3068        | CakSNP3068     | <i>Kabuli</i>    | <i>Ca_Kabuli_Chr02</i>       | 32577593                       | (A/G)       |
| 3069        | CakSNP3069     | <i>Kabuli</i>    | <i>Ca_Kabuli_Chr02</i>       | 32579849                       | (T/C)       |
| 3070        | CakSNP3070     | <i>Kabuli</i>    | <i>Ca_Kabuli_Chr02</i>       | 32579900                       | (C/G)       |
| 3071        | CakSNP3071     | <i>Kabuli</i>    | <i>Ca_Kabuli_Chr02</i>       | 32608900                       | (A/T)       |
| 3072        | CakSNP3072     | <i>Kabuli</i>    | <i>Ca_Kabuli_Chr02</i>       | 32611624                       | (C/T)       |
| 3073        | CakSNP3073     | <i>Kabuli</i>    | <i>Ca_Kabuli_Chr02</i>       | 32611609                       | (A/G)       |
| 3074        | CakSNP3074     | <i>Kabuli</i>    | <i>Ca_Kabuli_Chr02</i>       | 32611601                       | (G/T)       |
| 3075        | CakSNP3075     | <i>Kabuli</i>    | <i>Ca_Kabuli_Chr02</i>       | 32627727                       | (C/G)       |
| 3076        | CakSNP3076     | <i>Kabuli</i>    | <i>Ca_Kabuli_Chr02</i>       | 32629763                       | (A/G)       |
| 3077        | CakSNP3077     | <i>Kabuli</i>    | <i>Ca_Kabuli_Chr02</i>       | 32670054                       | (C/T)       |
| 3078        | CakSNP3078     | <i>Kabuli</i>    | <i>Ca_Kabuli_Chr02</i>       | 32670099                       | (C/T)       |
| 3079        | CakSNP3079     | <i>Kabuli</i>    | <i>Ca_Kabuli_Chr02</i>       | 32670181                       | (T/G)       |



| <b>S.N.</b> | <b>SNP IDs</b> | <b>Cultivars</b> | <b>Chromosomes/scaffolds</b> | <b>Physical positions (bp)</b> | <b>SNPs</b> |
|-------------|----------------|------------------|------------------------------|--------------------------------|-------------|
| 3080        | CakSNP3080     | <i>Kabuli</i>    | <i>Ca_Kabuli_Chr02</i>       | 32671354                       | (T/A)       |
| 3081        | CakSNP3081     | <i>Kabuli</i>    | <i>Ca_Kabuli_Chr02</i>       | 32781880                       | (A/G)       |
| 3082        | CakSNP3082     | <i>Kabuli</i>    | <i>Ca_Kabuli_Chr02</i>       | 32844754                       | (T/G)       |
| 3083        | CakSNP3083     | <i>Kabuli</i>    | <i>Ca_Kabuli_Chr02</i>       | 32844842                       | (C/G)       |
| 3084        | CakSNP3084     | <i>Kabuli</i>    | <i>Ca_Kabuli_Chr02</i>       | 32867125                       | (A/G)       |
| 3085        | CakSNP3085     | <i>Kabuli</i>    | <i>Ca_Kabuli_Chr02</i>       | 32934646                       | (C/T)       |
| 3086        | CakSNP3086     | <i>Kabuli</i>    | <i>Ca_Kabuli_Chr02</i>       | 32934633                       | (G/C)       |
| 3087        | CakSNP3087     | <i>Kabuli</i>    | <i>Ca_Kabuli_Chr02</i>       | 32936855                       | (A/G)       |
| 3088        | CakSNP3088     | <i>Kabuli</i>    | <i>Ca_Kabuli_Chr02</i>       | 32936908                       | (G/A)       |
| 3089        | CakSNP3089     | <i>Kabuli</i>    | <i>Ca_Kabuli_Chr02</i>       | 32957515                       | (A/G)       |
| 3090        | CakSNP3090     | <i>Kabuli</i>    | <i>Ca_Kabuli_Chr02</i>       | 32957523                       | (T/C)       |
| 3091        | CakSNP3091     | <i>Kabuli</i>    | <i>Ca_Kabuli_Chr02</i>       | 32957538                       | (A/C)       |
| 3092        | CakSNP3092     | <i>Kabuli</i>    | <i>Ca_Kabuli_Chr02</i>       | 32957572                       | (A/C)       |
| 3093        | CakSNP3093     | <i>Kabuli</i>    | <i>Ca_Kabuli_Chr02</i>       | 32957958                       | (A/C)       |
| 3094        | CakSNP3094     | <i>Kabuli</i>    | <i>Ca_Kabuli_Chr02</i>       | 32958034                       | (C/G)       |
| 3095        | CakSNP3095     | <i>Kabuli</i>    | <i>Ca_Kabuli_Chr02</i>       | 32989134                       | (G/T)       |
| 3096        | CakSNP3096     | <i>Kabuli</i>    | <i>Ca_Kabuli_Chr02</i>       | 32989205                       | (G/T)       |
| 3097        | CakSNP3097     | <i>Kabuli</i>    | <i>Ca_Kabuli_Chr02</i>       | 33083903                       | (T/A)       |
| 3098        | CakSNP3098     | <i>Kabuli</i>    | <i>Ca_Kabuli_Chr02</i>       | 33084095                       | (T/G)       |
| 3099        | CakSNP3099     | <i>Kabuli</i>    | <i>Ca_Kabuli_Chr02</i>       | 33084132                       | (T/A)       |
| 3100        | CakSNP3100     | <i>Kabuli</i>    | <i>Ca_Kabuli_Chr02</i>       | 33103318                       | (G/A)       |
| 3101        | CakSNP3101     | <i>Kabuli</i>    | <i>Ca_Kabuli_Chr02</i>       | 33103466                       | (G/A)       |
| 3102        | CakSNP3102     | <i>Kabuli</i>    | <i>Ca_Kabuli_Chr02</i>       | 33103750                       | (A/G)       |
| 3103        | CakSNP3103     | <i>Kabuli</i>    | <i>Ca_Kabuli_Chr02</i>       | 33103766                       | (G/A)       |
| 3104        | CakSNP3104     | <i>Kabuli</i>    | <i>Ca_Kabuli_Chr02</i>       | 33172936                       | (C/T)       |
| 3105        | CakSNP3105     | <i>Kabuli</i>    | <i>Ca_Kabuli_Chr02</i>       | 33172971                       | (T/G)       |
| 3106        | CakSNP3106     | <i>Kabuli</i>    | <i>Ca_Kabuli_Chr02</i>       | 33178391                       | (G/A)       |
| 3107        | CakSNP3107     | <i>Kabuli</i>    | <i>Ca_Kabuli_Chr02</i>       | 33178407                       | (C/T)       |
| 3108        | CakSNP3108     | <i>Kabuli</i>    | <i>Ca_Kabuli_Chr02</i>       | 33178419                       | (C/A)       |
| 3109        | CakSNP3109     | <i>Kabuli</i>    | <i>Ca_Kabuli_Chr02</i>       | 33178420                       | (A/C)       |
| 3110        | CakSNP3110     | <i>Kabuli</i>    | <i>Ca_Kabuli_Chr02</i>       | 33178506                       | (T/C)       |
| 3111        | CakSNP3111     | <i>Kabuli</i>    | <i>Ca_Kabuli_Chr02</i>       | 33184262                       | (T/C)       |
| 3112        | CakSNP3112     | <i>Kabuli</i>    | <i>Ca_Kabuli_Chr02</i>       | 33194198                       | (A/G)       |
| 3113        | CakSNP3113     | <i>Kabuli</i>    | <i>Ca_Kabuli_Chr02</i>       | 33204253                       | (C/T)       |
| 3114        | CakSNP3114     | <i>Kabuli</i>    | <i>Ca_Kabuli_Chr02</i>       | 33326392                       | (T/G)       |
| 3115        | CakSNP3115     | <i>Kabuli</i>    | <i>Ca_Kabuli_Chr02</i>       | 33326398                       | (C/T)       |
| 3116        | CakSNP3116     | <i>Kabuli</i>    | <i>Ca_Kabuli_Chr02</i>       | 33326444                       | (G/A)       |
| 3117        | CakSNP3117     | <i>Kabuli</i>    | <i>Ca_Kabuli_Chr02</i>       | 33326522                       | (G/A)       |
| 3118        | CakSNP3118     | <i>Kabuli</i>    | <i>Ca_Kabuli_Chr02</i>       | 33326520                       | (T/C)       |

| <b>S.N.</b> | <b>SNP IDs</b> | <b>Cultivars</b> | <b>Chromosomes/scaffolds</b> | <b>Physical positions (bp)</b> | <b>SNPs</b> |
|-------------|----------------|------------------|------------------------------|--------------------------------|-------------|
| 3119        | CakSNP3119     | <i>Kabuli</i>    | <i>Ca_Kabuli_Chr02</i>       | 33326516                       | (G/A)       |
| 3120        | CakSNP3120     | <i>Kabuli</i>    | <i>Ca_Kabuli_Chr02</i>       | 33326510                       | (C/G)       |
| 3121        | CakSNP3121     | <i>Kabuli</i>    | <i>Ca_Kabuli_Chr02</i>       | 33393209                       | (T/C)       |
| 3122        | CakSNP3122     | <i>Kabuli</i>    | <i>Ca_Kabuli_Chr02</i>       | 33398561                       | (C/T)       |
| 3123        | CakSNP3123     | <i>Kabuli</i>    | <i>Ca_Kabuli_Chr02</i>       | 33398550                       | (G/A)       |
| 3124        | CakSNP3124     | <i>Kabuli</i>    | <i>Ca_Kabuli_Chr02</i>       | 33398549                       | (T/C)       |
| 3125        | CakSNP3125     | <i>Kabuli</i>    | <i>Ca_Kabuli_Chr02</i>       | 33398527                       | (T/G)       |
| 3126        | CakSNP3126     | <i>Kabuli</i>    | <i>Ca_Kabuli_Chr02</i>       | 33399010                       | (C/T)       |
| 3127        | CakSNP3127     | <i>Kabuli</i>    | <i>Ca_Kabuli_Chr02</i>       | 33399019                       | (T/C)       |
| 3128        | CakSNP3128     | <i>Kabuli</i>    | <i>Ca_Kabuli_Chr02</i>       | 33399045                       | (A/C)       |
| 3129        | CakSNP3129     | <i>Kabuli</i>    | <i>Ca_Kabuli_Chr02</i>       | 33399098                       | (G/A)       |
| 3130        | CakSNP3130     | <i>Kabuli</i>    | <i>Ca_Kabuli_Chr02</i>       | 33399063                       | (C/T)       |
| 3131        | CakSNP3131     | <i>Kabuli</i>    | <i>Ca_Kabuli_Chr02</i>       | 33399405                       | (C/T)       |
| 3132        | CakSNP3132     | <i>Kabuli</i>    | <i>Ca_Kabuli_Chr02</i>       | 33399404                       | (C/A)       |
| 3133        | CakSNP3133     | <i>Kabuli</i>    | <i>Ca_Kabuli_Chr02</i>       | 33399397                       | (C/T)       |
| 3134        | CakSNP3134     | <i>Kabuli</i>    | <i>Ca_Kabuli_Chr02</i>       | 33399393                       | (C/A)       |
| 3135        | CakSNP3135     | <i>Kabuli</i>    | <i>Ca_Kabuli_Chr02</i>       | 33399381                       | (C/T)       |
| 3136        | CakSNP3136     | <i>Kabuli</i>    | <i>Ca_Kabuli_Chr02</i>       | 33399342                       | (A/C)       |
| 3137        | CakSNP3137     | <i>Kabuli</i>    | <i>Ca_Kabuli_Chr02</i>       | 33399465                       | (C/G)       |
| 3138        | CakSNP3138     | <i>Kabuli</i>    | <i>Ca_Kabuli_Chr02</i>       | 33399608                       | (C/A)       |
| 3139        | CakSNP3139     | <i>Kabuli</i>    | <i>Ca_Kabuli_Chr02</i>       | 33401608                       | (A/G)       |
| 3140        | CakSNP3140     | <i>Kabuli</i>    | <i>Ca_Kabuli_Chr02</i>       | 33490058                       | (C/A)       |
| 3141        | CakSNP3141     | <i>Kabuli</i>    | <i>Ca_Kabuli_Chr02</i>       | 33489989                       | (T/C)       |
| 3142        | CakSNP3142     | <i>Kabuli</i>    | <i>Ca_Kabuli_Chr02</i>       | 33575286                       | (A/C)       |
| 3143        | CakSNP3143     | <i>Kabuli</i>    | <i>Ca_Kabuli_Chr02</i>       | 33582948                       | (G/A)       |
| 3144        | CakSNP3144     | <i>Kabuli</i>    | <i>Ca_Kabuli_Chr02</i>       | 33582900                       | (G/A)       |
| 3145        | CakSNP3145     | <i>Kabuli</i>    | <i>Ca_Kabuli_Chr02</i>       | 33650447                       | (A/T)       |
| 3146        | CakSNP3146     | <i>Kabuli</i>    | <i>Ca_Kabuli_Chr02</i>       | 33651426                       | (G/A)       |
| 3147        | CakSNP3147     | <i>Kabuli</i>    | <i>Ca_Kabuli_Chr02</i>       | 33651408                       | (A/G)       |
| 3148        | CakSNP3148     | <i>Kabuli</i>    | <i>Ca_Kabuli_Chr02</i>       | 33661177                       | (C/T)       |
| 3149        | CakSNP3149     | <i>Kabuli</i>    | <i>Ca_Kabuli_Chr02</i>       | 33661316                       | (T/C)       |
| 3150        | CakSNP3150     | <i>Kabuli</i>    | <i>Ca_Kabuli_Chr02</i>       | 33686794                       | (G/A)       |
| 3151        | CakSNP3151     | <i>Kabuli</i>    | <i>Ca_Kabuli_Chr02</i>       | 33692368                       | (C/A)       |
| 3152        | CakSNP3152     | <i>Kabuli</i>    | <i>Ca_Kabuli_Chr02</i>       | 33713018                       | (G/A)       |
| 3153        | CakSNP3153     | <i>Kabuli</i>    | <i>Ca_Kabuli_Chr02</i>       | 33721515                       | (T/A)       |
| 3154        | CakSNP3154     | <i>Kabuli</i>    | <i>Ca_Kabuli_Chr02</i>       | 33733893                       | (C/T)       |
| 3155        | CakSNP3155     | <i>Kabuli</i>    | <i>Ca_Kabuli_Chr02</i>       | 33745281                       | (A/G)       |
| 3156        | CakSNP3156     | <i>Kabuli</i>    | <i>Ca_Kabuli_Chr02</i>       | 33764634                       | (G/A)       |
| 3157        | CakSNP3157     | <i>Kabuli</i>    | <i>Ca_Kabuli_Chr02</i>       | 33783871                       | (C/T)       |

| <b>S.N.</b> | <b>SNP IDs</b> | <b>Cultivars</b> | <b>Chromosomes/scaffolds</b> | <b>Physical positions (bp)</b> | <b>SNPs</b> |
|-------------|----------------|------------------|------------------------------|--------------------------------|-------------|
| 3158        | CakSNP3158     | <i>Kabuli</i>    | <i>Ca_Kabuli_Chr02</i>       | 33785203                       | (G/A)       |
| 3159        | CakSNP3159     | <i>Kabuli</i>    | <i>Ca_Kabuli_Chr02</i>       | 33786243                       | (G/A)       |
| 3160        | CakSNP3160     | <i>Kabuli</i>    | <i>Ca_Kabuli_Chr02</i>       | 33788913                       | (A/C)       |
| 3161        | CakSNP3161     | <i>Kabuli</i>    | <i>Ca_Kabuli_Chr02</i>       | 33798717                       | (T/C)       |
| 3162        | CakSNP3162     | <i>Kabuli</i>    | <i>Ca_Kabuli_Chr02</i>       | 33798748                       | (T/C)       |
| 3163        | CakSNP3163     | <i>Kabuli</i>    | <i>Ca_Kabuli_Chr02</i>       | 34152352                       | (T/C)       |
| 3164        | CakSNP3164     | <i>Kabuli</i>    | <i>Ca_Kabuli_Chr02</i>       | 34152384                       | (T/C)       |
| 3165        | CakSNP3165     | <i>Kabuli</i>    | <i>Ca_Kabuli_Chr02</i>       | 34152476                       | (C/T)       |
| 3166        | CakSNP3166     | <i>Kabuli</i>    | <i>Ca_Kabuli_Chr02</i>       | 34155090                       | (A/G)       |
| 3167        | CakSNP3167     | <i>Kabuli</i>    | <i>Ca_Kabuli_Chr02</i>       | 34155179                       | (A/G)       |
| 3168        | CakSNP3168     | <i>Kabuli</i>    | <i>Ca_Kabuli_Chr02</i>       | 34178534                       | (G/A)       |
| 3169        | CakSNP3169     | <i>Kabuli</i>    | <i>Ca_Kabuli_Chr02</i>       | 34203162                       | (T/C)       |
| 3170        | CakSNP3170     | <i>Kabuli</i>    | <i>Ca_Kabuli_Chr02</i>       | 34203444                       | (T/C)       |
| 3171        | CakSNP3171     | <i>Kabuli</i>    | <i>Ca_Kabuli_Chr02</i>       | 34222585                       | (G/A)       |
| 3172        | CakSNP3172     | <i>Kabuli</i>    | <i>Ca_Kabuli_Chr02</i>       | 34249987                       | (C/T)       |
| 3173        | CakSNP3173     | <i>Kabuli</i>    | <i>Ca_Kabuli_Chr02</i>       | 34249953                       | (G/T)       |
| 3174        | CakSNP3174     | <i>Kabuli</i>    | <i>Ca_Kabuli_Chr02</i>       | 34250042                       | (C/T)       |
| 3175        | CakSNP3175     | <i>Kabuli</i>    | <i>Ca_Kabuli_Chr02</i>       | 34250266                       | (T/C)       |
| 3176        | CakSNP3176     | <i>Kabuli</i>    | <i>Ca_Kabuli_Chr02</i>       | 34266109                       | (A/G)       |
| 3177        | CakSNP3177     | <i>Kabuli</i>    | <i>Ca_Kabuli_Chr02</i>       | 34288116                       | (G/C)       |
| 3178        | CakSNP3178     | <i>Kabuli</i>    | <i>Ca_Kabuli_Chr02</i>       | 34299096                       | (G/A)       |
| 3179        | CakSNP3179     | <i>Kabuli</i>    | <i>Ca_Kabuli_Chr02</i>       | 34299075                       | (C/T)       |
| 3180        | CakSNP3180     | <i>Kabuli</i>    | <i>Ca_Kabuli_Chr02</i>       | 34299074                       | (A/C)       |
| 3181        | CakSNP3181     | <i>Kabuli</i>    | <i>Ca_Kabuli_Chr02</i>       | 34299063                       | (G/A)       |
| 3182        | CakSNP3182     | <i>Kabuli</i>    | <i>Ca_Kabuli_Chr02</i>       | 34299079                       | (A/C)       |
| 3183        | CakSNP3183     | <i>Kabuli</i>    | <i>Ca_Kabuli_Chr02</i>       | 34299846                       | (C/T)       |
| 3184        | CakSNP3184     | <i>Kabuli</i>    | <i>Ca_Kabuli_Chr02</i>       | 34300059                       | (A/G)       |
| 3185        | CakSNP3185     | <i>Kabuli</i>    | <i>Ca_Kabuli_Chr02</i>       | 34300057                       | (A/G)       |
| 3186        | CakSNP3186     | <i>Kabuli</i>    | <i>Ca_Kabuli_Chr02</i>       | 34343478                       | (C/G)       |
| 3187        | CakSNP3187     | <i>Kabuli</i>    | <i>Ca_Kabuli_Chr02</i>       | 34343705                       | (G/A)       |
| 3188        | CakSNP3188     | <i>Kabuli</i>    | <i>Ca_Kabuli_Chr02</i>       | 34346849                       | (C/T)       |
| 3189        | CakSNP3189     | <i>Kabuli</i>    | <i>Ca_Kabuli_Chr02</i>       | 34346842                       | (T/C)       |
| 3190        | CakSNP3190     | <i>Kabuli</i>    | <i>Ca_Kabuli_Chr02</i>       | 34372503                       | (T/G)       |
| 3191        | CakSNP3191     | <i>Kabuli</i>    | <i>Ca_Kabuli_Chr02</i>       | 34428978                       | (C/A)       |
| 3192        | CakSNP3192     | <i>Kabuli</i>    | <i>Ca_Kabuli_Chr02</i>       | 34428979                       | (G/C)       |
| 3193        | CakSNP3193     | <i>Kabuli</i>    | <i>Ca_Kabuli_Chr02</i>       | 34429029                       | (G/T)       |
| 3194        | CakSNP3194     | <i>Kabuli</i>    | <i>Ca_Kabuli_Chr02</i>       | 34429030                       | (A/T)       |
| 3195        | CakSNP3195     | <i>Kabuli</i>    | <i>Ca_Kabuli_Chr02</i>       | 34551849                       | (A/C)       |
| 3196        | CakSNP3196     | <i>Kabuli</i>    | <i>Ca_Kabuli_Chr02</i>       | 34554164                       | (A/C)       |

| <b>S.N.</b> | <b>SNP IDs</b> | <b>Cultivars</b> | <b>Chromosomes/scaffolds</b> | <b>Physical positions (bp)</b> | <b>SNPs</b> |
|-------------|----------------|------------------|------------------------------|--------------------------------|-------------|
| 3197        | CakSNP3197     | <i>Kabuli</i>    | <i>Ca_Kabuli_Chr02</i>       | 34601444                       | (C/A)       |
| 3198        | CakSNP3198     | <i>Kabuli</i>    | <i>Ca_Kabuli_Chr02</i>       | 34634128                       | (C/T)       |
| 3199        | CakSNP3199     | <i>Kabuli</i>    | <i>Ca_Kabuli_Chr02</i>       | 34638960                       | (A/C)       |
| 3200        | CakSNP3200     | <i>Kabuli</i>    | <i>Ca_Kabuli_Chr02</i>       | 34638955                       | (T/A)       |
| 3201        | CakSNP3201     | <i>Kabuli</i>    | <i>Ca_Kabuli_Chr02</i>       | 34734329                       | (G/A)       |
| 3202        | CakSNP3202     | <i>Kabuli</i>    | <i>Ca_Kabuli_Chr02</i>       | 34734379                       | (G/A)       |
| 3203        | CakSNP3203     | <i>Kabuli</i>    | <i>Ca_Kabuli_Chr02</i>       | 34734439                       | (G/A)       |
| 3204        | CakSNP3204     | <i>Kabuli</i>    | <i>Ca_Kabuli_Chr02</i>       | 34734472                       | (A/G)       |
| 3205        | CakSNP3205     | <i>Kabuli</i>    | <i>Ca_Kabuli_Chr02</i>       | 34736649                       | (T/C)       |
| 3206        | CakSNP3206     | <i>Kabuli</i>    | <i>Ca_Kabuli_Chr02</i>       | 34736658                       | (A/C)       |
| 3207        | CakSNP3207     | <i>Kabuli</i>    | <i>Ca_Kabuli_Chr02</i>       | 34736753                       | (C/T)       |
| 3208        | CakSNP3208     | <i>Kabuli</i>    | <i>Ca_Kabuli_Chr02</i>       | 34754363                       | (T/C)       |
| 3209        | CakSNP3209     | <i>Kabuli</i>    | <i>Ca_Kabuli_Chr02</i>       | 34754507                       | (C/T)       |
| 3210        | CakSNP3210     | <i>Kabuli</i>    | <i>Ca_Kabuli_Chr02</i>       | 34820075                       | (C/T)       |
| 3211        | CakSNP3211     | <i>Kabuli</i>    | <i>Ca_Kabuli_Chr02</i>       | 34830995                       | (A/G)       |
| 3212        | CakSNP3212     | <i>Kabuli</i>    | <i>Ca_Kabuli_Chr02</i>       | 34847681                       | (C/A)       |
| 3213        | CakSNP3213     | <i>Kabuli</i>    | <i>Ca_Kabuli_Chr02</i>       | 34848053                       | (G/A)       |
| 3214        | CakSNP3214     | <i>Kabuli</i>    | <i>Ca_Kabuli_Chr02</i>       | 34848480                       | (T/C)       |
| 3215        | CakSNP3215     | <i>Kabuli</i>    | <i>Ca_Kabuli_Chr02</i>       | 34862129                       | (G/T)       |
| 3216        | CakSNP3216     | <i>Kabuli</i>    | <i>Ca_Kabuli_Chr02</i>       | 34862135                       | (G/A)       |
| 3217        | CakSNP3217     | <i>Kabuli</i>    | <i>Ca_Kabuli_Chr02</i>       | 34862139                       | (A/G)       |
| 3218        | CakSNP3218     | <i>Kabuli</i>    | <i>Ca_Kabuli_Chr02</i>       | 34862150                       | (C/T)       |
| 3219        | CakSNP3219     | <i>Kabuli</i>    | <i>Ca_Kabuli_Chr02</i>       | 34862276                       | (C/G)       |
| 3220        | CakSNP3220     | <i>Kabuli</i>    | <i>Ca_Kabuli_Chr02</i>       | 34888414                       | (T/C)       |
| 3221        | CakSNP3221     | <i>Kabuli</i>    | <i>Ca_Kabuli_Chr02</i>       | 35013088                       | (G/C)       |
| 3222        | CakSNP3222     | <i>Kabuli</i>    | <i>Ca_Kabuli_Chr02</i>       | 35013084                       | (T/C)       |
| 3223        | CakSNP3223     | <i>Kabuli</i>    | <i>Ca_Kabuli_Chr02</i>       | 35052930                       | (C/A)       |
| 3224        | CakSNP3224     | <i>Kabuli</i>    | <i>Ca_Kabuli_Chr02</i>       | 35054244                       | (C/A)       |
| 3225        | CakSNP3225     | <i>Kabuli</i>    | <i>Ca_Kabuli_Chr02</i>       | 35059446                       | (A/T)       |
| 3226        | CakSNP3226     | <i>Kabuli</i>    | <i>Ca_Kabuli_Chr02</i>       | 35059434                       | (T/C)       |
| 3227        | CakSNP3227     | <i>Kabuli</i>    | <i>Ca_Kabuli_Chr02</i>       | 35059440                       | (A/C)       |
| 3228        | CakSNP3228     | <i>Kabuli</i>    | <i>Ca_Kabuli_Chr02</i>       | 35059451                       | (C/A)       |
| 3229        | CakSNP3229     | <i>Kabuli</i>    | <i>Ca_Kabuli_Chr02</i>       | 35060171                       | (A/G)       |
| 3230        | CakSNP3230     | <i>Kabuli</i>    | <i>Ca_Kabuli_Chr02</i>       | 35060178                       | (A/T)       |
| 3231        | CakSNP3231     | <i>Kabuli</i>    | <i>Ca_Kabuli_Chr02</i>       | 35060228                       | (T/C)       |
| 3232        | CakSNP3232     | <i>Kabuli</i>    | <i>Ca_Kabuli_Chr02</i>       | 35060273                       | (G/A)       |
| 3233        | CakSNP3233     | <i>Kabuli</i>    | <i>Ca_Kabuli_Chr02</i>       | 35060264                       | (A/T)       |
| 3234        | CakSNP3234     | <i>Kabuli</i>    | <i>Ca_Kabuli_Chr02</i>       | 35066138                       | (G/A)       |
| 3235        | CakSNP3235     | <i>Kabuli</i>    | <i>Ca_Kabuli_Chr02</i>       | 35095010                       | (A/G)       |

| <b>S.N.</b> | <b>SNP IDs</b> | <b>Cultivars</b> | <b>Chromosomes/scaffolds</b> | <b>Physical positions (bp)</b> | <b>SNPs</b> |
|-------------|----------------|------------------|------------------------------|--------------------------------|-------------|
| 3236        | CakSNP3236     | <i>Kabuli</i>    | <i>Ca_Kabuli_Chr02</i>       | 35096648                       | (A/T)       |
| 3237        | CakSNP3237     | <i>Kabuli</i>    | <i>Ca_Kabuli_Chr02</i>       | 35096649                       | (A/T)       |
| 3238        | CakSNP3238     | <i>Kabuli</i>    | <i>Ca_Kabuli_Chr02</i>       | 35120761                       | (G/A)       |
| 3239        | CakSNP3239     | <i>Kabuli</i>    | <i>Ca_Kabuli_Chr02</i>       | 35122109                       | (C/G)       |
| 3240        | CakSNP3240     | <i>Kabuli</i>    | <i>Ca_Kabuli_Chr02</i>       | 35154629                       | (C/A)       |
| 3241        | CakSNP3241     | <i>Kabuli</i>    | <i>Ca_Kabuli_Chr02</i>       | 35154603                       | (G/A)       |
| 3242        | CakSNP3242     | <i>Kabuli</i>    | <i>Ca_Kabuli_Chr02</i>       | 35171882                       | (T/G)       |
| 3243        | CakSNP3243     | <i>Kabuli</i>    | <i>Ca_Kabuli_Chr02</i>       | 35189471                       | (C/T)       |
| 3244        | CakSNP3244     | <i>Kabuli</i>    | <i>Ca_Kabuli_Chr02</i>       | 35195303                       | (T/C)       |
| 3245        | CakSNP3245     | <i>Kabuli</i>    | <i>Ca_Kabuli_Chr02</i>       | 35198352                       | (T/C)       |
| 3246        | CakSNP3246     | <i>Kabuli</i>    | <i>Ca_Kabuli_Chr02</i>       | 35209940                       | (C/T)       |
| 3247        | CakSNP3247     | <i>Kabuli</i>    | <i>Ca_Kabuli_Chr02</i>       | 35362587                       | (A/G)       |
| 3248        | CakSNP3248     | <i>Kabuli</i>    | <i>Ca_Kabuli_Chr02</i>       | 35362642                       | (A/G)       |
| 3249        | CakSNP3249     | <i>Kabuli</i>    | <i>Ca_Kabuli_Chr02</i>       | 35362657                       | (C/A)       |
| 3250        | CakSNP3250     | <i>Kabuli</i>    | <i>Ca_Kabuli_Chr02</i>       | 35362729                       | (A/G)       |
| 3251        | CakSNP3251     | <i>Kabuli</i>    | <i>Ca_Kabuli_Chr02</i>       | 35363488                       | (T/C)       |
| 3252        | CakSNP3252     | <i>Kabuli</i>    | <i>Ca_Kabuli_Chr02</i>       | 35363501                       | (T/C)       |
| 3253        | CakSNP3253     | <i>Kabuli</i>    | <i>Ca_Kabuli_Chr02</i>       | 35365029                       | (C/T)       |
| 3254        | CakSNP3254     | <i>Kabuli</i>    | <i>Ca_Kabuli_Chr02</i>       | 35367161                       | (G/A)       |
| 3255        | CakSNP3255     | <i>Kabuli</i>    | <i>Ca_Kabuli_Chr02</i>       | 35413400                       | (T/A)       |
| 3256        | CakSNP3256     | <i>Kabuli</i>    | <i>Ca_Kabuli_Chr02</i>       | 35441184                       | (C/T)       |
| 3257        | CakSNP3257     | <i>Kabuli</i>    | <i>Ca_Kabuli_Chr02</i>       | 35441180                       | (A/G)       |
| 3258        | CakSNP3258     | <i>Kabuli</i>    | <i>Ca_Kabuli_Chr02</i>       | 35441174                       | (T/G)       |
| 3259        | CakSNP3259     | <i>Kabuli</i>    | <i>Ca_Kabuli_Chr02</i>       | 35447976                       | (A/G)       |
| 3260        | CakSNP3260     | <i>Kabuli</i>    | <i>Ca_Kabuli_Chr02</i>       | 35448018                       | (C/G)       |
| 3261        | CakSNP3261     | <i>Kabuli</i>    | <i>Ca_Kabuli_Chr02</i>       | 35448126                       | (T/A)       |
| 3262        | CakSNP3262     | <i>Kabuli</i>    | <i>Ca_Kabuli_Chr02</i>       | 35449653                       | (G/A)       |
| 3263        | CakSNP3263     | <i>Kabuli</i>    | <i>Ca_Kabuli_Chr02</i>       | 35473250                       | (C/T)       |
| 3264        | CakSNP3264     | <i>Kabuli</i>    | <i>Ca_Kabuli_Chr02</i>       | 35505791                       | (C/G)       |
| 3265        | CakSNP3265     | <i>Kabuli</i>    | <i>Ca_Kabuli_Chr02</i>       | 35505874                       | (T/G)       |
| 3266        | CakSNP3266     | <i>Kabuli</i>    | <i>Ca_Kabuli_Chr02</i>       | 35533246                       | (G/A)       |
| 3267        | CakSNP3267     | <i>Kabuli</i>    | <i>Ca_Kabuli_Chr02</i>       | 35593439                       | (T/C)       |
| 3268        | CakSNP3268     | <i>Kabuli</i>    | <i>Ca_Kabuli_Chr02</i>       | 35593797                       | (G/T)       |
| 3269        | CakSNP3269     | <i>Kabuli</i>    | <i>Ca_Kabuli_Chr02</i>       | 35593824                       | (A/C)       |
| 3270        | CakSNP3270     | <i>Kabuli</i>    | <i>Ca_Kabuli_Chr02</i>       | 35593827                       | (A/G)       |
| 3271        | CakSNP3271     | <i>Kabuli</i>    | <i>Ca_Kabuli_Chr02</i>       | 35594018                       | (A/T)       |
| 3272        | CakSNP3272     | <i>Kabuli</i>    | <i>Ca_Kabuli_Chr02</i>       | 35594013                       | (C/T)       |
| 3273        | CakSNP3273     | <i>Kabuli</i>    | <i>Ca_Kabuli_Chr02</i>       | 35593985                       | (A/G)       |
| 3274        | CakSNP3274     | <i>Kabuli</i>    | <i>Ca_Kabuli_Chr02</i>       | 35593965                       | (C/T)       |

| <b>S.N.</b> | <b>SNP IDs</b> | <b>Cultivars</b> | <b>Chromosomes/scaffolds</b> | <b>Physical positions (bp)</b> | <b>SNPs</b> |
|-------------|----------------|------------------|------------------------------|--------------------------------|-------------|
| 3275        | CakSNP3275     | Kabuli           | Ca_Kabuli_Chr02              | 35593956                       | (A/G)       |
| 3276        | CakSNP3276     | Kabuli           | Ca_Kabuli_Chr02              | 35601566                       | (T/C)       |
| 3277        | CakSNP3277     | Kabuli           | Ca_Kabuli_Chr02              | 35601571                       | (A/C)       |
| 3278        | CakSNP3278     | Kabuli           | Ca_Kabuli_Chr02              | 35601578                       | (C/T)       |
| 3279        | CakSNP3279     | Kabuli           | Ca_Kabuli_Chr02              | 35601605                       | (G/A)       |
| 3280        | CakSNP3280     | Kabuli           | Ca_Kabuli_Chr02              | 35601691                       | (A/G)       |
| 3281        | CakSNP3281     | Kabuli           | Ca_Kabuli_Chr02              | 35601657                       | (T/C)       |
| 3282        | CakSNP3282     | Kabuli           | Ca_Kabuli_Chr02              | 35601632                       | (G/T)       |
| 3283        | CakSNP3283     | Kabuli           | Ca_Kabuli_Chr02              | 35612587                       | (C/A)       |
| 3284        | CakSNP3284     | Kabuli           | Ca_Kabuli_Chr02              | 35612590                       | (G/A)       |
| 3285        | CakSNP3285     | Kabuli           | Ca_Kabuli_Chr02              | 35612644                       | (G/A)       |
| 3286        | CakSNP3286     | Kabuli           | Ca_Kabuli_Chr02              | 35612788                       | (G/A)       |
| 3287        | CakSNP3287     | Kabuli           | Ca_Kabuli_Chr02              | 35612895                       | (T/C)       |
| 3288        | CakSNP3288     | Kabuli           | Ca_Kabuli_Chr02              | 35612900                       | (C/T)       |
| 3289        | CakSNP3289     | Kabuli           | Ca_Kabuli_Chr02              | 35613016                       | (G/A)       |
| 3290        | CakSNP3290     | Kabuli           | Ca_Kabuli_Chr02              | 35613135                       | (T/C)       |
| 3291        | CakSNP3291     | Kabuli           | Ca_Kabuli_Chr02              | 35658426                       | (C/T)       |
| 3292        | CakSNP3292     | Kabuli           | Ca_Kabuli_Chr02              | 35658537                       | (T/C)       |
| 3293        | CakSNP3293     | Kabuli           | Ca_Kabuli_Chr02              | 35661053                       | (C/T)       |
| 3294        | CakSNP3294     | Kabuli           | Ca_Kabuli_Chr02              | 35670478                       | (A/G)       |
| 3295        | CakSNP3295     | Kabuli           | Ca_Kabuli_Chr02              | 35704018                       | (A/G)       |
| 3296        | CakSNP3296     | Kabuli           | Ca_Kabuli_Chr02              | 35704069                       | (G/A)       |
| 3297        | CakSNP3297     | Kabuli           | Ca_Kabuli_Chr02              | 35704228                       | (C/A)       |
| 3298        | CakSNP3298     | Kabuli           | Ca_Kabuli_Chr02              | 35704213                       | (A/G)       |
| 3299        | CakSNP3299     | Kabuli           | Ca_Kabuli_Chr02              | 35704204                       | (T/C)       |
| 3300        | CakSNP3300     | Kabuli           | Ca_Kabuli_Chr02              | 35704200                       | (T/C)       |
| 3301        | CakSNP3301     | Kabuli           | Ca_Kabuli_Chr02              | 35704180                       | (A/G)       |
| 3302        | CakSNP3302     | Kabuli           | Ca_Kabuli_Chr02              | 35704178                       | (G/A)       |
| 3303        | CakSNP3303     | Kabuli           | Ca_Kabuli_Chr02              | 35728285                       | (T/A)       |
| 3304        | CakSNP3304     | Kabuli           | Ca_Kabuli_Chr02              | 35754617                       | (G/T)       |
| 3305        | CakSNP3305     | Kabuli           | Ca_Kabuli_Chr02              | 35754557                       | (C/T)       |
| 3306        | CakSNP3306     | Kabuli           | Ca_Kabuli_Chr02              | 35754680                       | (C/A)       |
| 3307        | CakSNP3307     | Kabuli           | Ca_Kabuli_Chr02              | 35754682                       | (A/G)       |
| 3308        | CakSNP3308     | Kabuli           | Ca_Kabuli_Chr02              | 35754806                       | (G/C)       |
| 3309        | CakSNP3309     | Kabuli           | Ca_Kabuli_Chr02              | 35754757                       | (G/C)       |
| 3310        | CakSNP3310     | Kabuli           | Ca_Kabuli_Chr02              | 35759932                       | (A/T)       |
| 3311        | CakSNP3311     | Kabuli           | Ca_Kabuli_Chr02              | 35759940                       | (T/C)       |
| 3312        | CakSNP3312     | Kabuli           | Ca_Kabuli_Chr02              | 35759981                       | (G/A)       |
| 3313        | CakSNP3313     | Kabuli           | Ca_Kabuli_Chr02              | 35760062                       | (G/C)       |

| <b>S.N.</b> | <b>SNP IDs</b> | <b>Cultivars</b> | <b>Chromosomes/scaffolds</b> | <b>Physical positions (bp)</b> | <b>SNPs</b> |
|-------------|----------------|------------------|------------------------------|--------------------------------|-------------|
| 3314        | CakSNP3314     | <i>Kabuli</i>    | <i>Ca_Kabuli_Chr02</i>       | 35760073                       | (A/T)       |
| 3315        | CakSNP3315     | <i>Kabuli</i>    | <i>Ca_Kabuli_Chr02</i>       | 35760170                       | (A/G)       |
| 3316        | CakSNP3316     | <i>Kabuli</i>    | <i>Ca_Kabuli_Chr02</i>       | 35760155                       | (G/A)       |
| 3317        | CakSNP3317     | <i>Kabuli</i>    | <i>Ca_Kabuli_Chr02</i>       | 35770569                       | (A/G)       |
| 3318        | CakSNP3318     | <i>Kabuli</i>    | <i>Ca_Kabuli_Chr02</i>       | 35795446                       | (G/A)       |
| 3319        | CakSNP3319     | <i>Kabuli</i>    | <i>Ca_Kabuli_Chr02</i>       | 35795395                       | (A/G)       |
| 3320        | CakSNP3320     | <i>Kabuli</i>    | <i>Ca_Kabuli_Chr02</i>       | 35795494                       | (G/A)       |
| 3321        | CakSNP3321     | <i>Kabuli</i>    | <i>Ca_Kabuli_Chr02</i>       | 35795496                       | (G/T)       |
| 3322        | CakSNP3322     | <i>Kabuli</i>    | <i>Ca_Kabuli_Chr02</i>       | 35795497                       | (G/T)       |
| 3323        | CakSNP3323     | <i>Kabuli</i>    | <i>Ca_Kabuli_Chr02</i>       | 35795521                       | (T/C)       |
| 3324        | CakSNP3324     | <i>Kabuli</i>    | <i>Ca_Kabuli_Chr02</i>       | 35828553                       | (G/A)       |
| 3325        | CakSNP3325     | <i>Kabuli</i>    | <i>Ca_Kabuli_Chr02</i>       | 35829782                       | (A/G)       |
| 3326        | CakSNP3326     | <i>Kabuli</i>    | <i>Ca_Kabuli_Chr02</i>       | 35844790                       | (A/G)       |
| 3327        | CakSNP3327     | <i>Kabuli</i>    | <i>Ca_Kabuli_Chr02</i>       | 35844762                       | (A/G)       |
| 3328        | CakSNP3328     | <i>Kabuli</i>    | <i>Ca_Kabuli_Chr02</i>       | 35862852                       | (C/T)       |
| 3329        | CakSNP3329     | <i>Kabuli</i>    | <i>Ca_Kabuli_Chr02</i>       | 35862878                       | (T/G)       |
| 3330        | CakSNP3330     | <i>Kabuli</i>    | <i>Ca_Kabuli_Chr02</i>       | 35875666                       | (A/G)       |
| 3331        | CakSNP3331     | <i>Kabuli</i>    | <i>Ca_Kabuli_Chr02</i>       | 35875653                       | (C/T)       |
| 3332        | CakSNP3332     | <i>Kabuli</i>    | <i>Ca_Kabuli_Chr02</i>       | 35930699                       | (T/G)       |
| 3333        | CakSNP3333     | <i>Kabuli</i>    | <i>Ca_Kabuli_Chr02</i>       | 35993062                       | (C/T)       |
| 3334        | CakSNP3334     | <i>Kabuli</i>    | <i>Ca_Kabuli_Chr02</i>       | 35993082                       | (T/G)       |
| 3335        | CakSNP3335     | <i>Kabuli</i>    | <i>Ca_Kabuli_Chr02</i>       | 35993089                       | (C/T)       |
| 3336        | CakSNP3336     | <i>Kabuli</i>    | <i>Ca_Kabuli_Chr02</i>       | 35993092                       | (A/T)       |
| 3337        | CakSNP3337     | <i>Kabuli</i>    | <i>Ca_Kabuli_Chr02</i>       | 35993178                       | (G/A)       |
| 3338        | CakSNP3338     | <i>Kabuli</i>    | <i>Ca_Kabuli_Chr02</i>       | 36013809                       | (A/G)       |
| 3339        | CakSNP3339     | <i>Kabuli</i>    | <i>Ca_Kabuli_Chr02</i>       | 36039428                       | (C/T)       |
| 3340        | CakSNP3340     | <i>Kabuli</i>    | <i>Ca_Kabuli_Chr02</i>       | 36039377                       | (C/T)       |
| 3341        | CakSNP3341     | <i>Kabuli</i>    | <i>Ca_Kabuli_Chr02</i>       | 36039364                       | (G/T)       |
| 3342        | CakSNP3342     | <i>Kabuli</i>    | <i>Ca_Kabuli_Chr02</i>       | 36046593                       | (G/T)       |
| 3343        | CakSNP3343     | <i>Kabuli</i>    | <i>Ca_Kabuli_Chr02</i>       | 36046595                       | (T/G)       |
| 3344        | CakSNP3344     | <i>Kabuli</i>    | <i>Ca_Kabuli_Chr02</i>       | 36046741                       | (G/A)       |
| 3345        | CakSNP3345     | <i>Kabuli</i>    | <i>Ca_Kabuli_Chr02</i>       | 36046720                       | (T/A)       |
| 3346        | CakSNP3346     | <i>Kabuli</i>    | <i>Ca_Kabuli_Chr02</i>       | 36046767                       | (T/A)       |
| 3347        | CakSNP3347     | <i>Kabuli</i>    | <i>Ca_Kabuli_Chr02</i>       | 36046799                       | (C/A)       |
| 3348        | CakSNP3348     | <i>Kabuli</i>    | <i>Ca_Kabuli_Chr02</i>       | 36046820                       | (T/A)       |
| 3349        | CakSNP3349     | <i>Kabuli</i>    | <i>Ca_Kabuli_Chr02</i>       | 36046844                       | (T/G)       |
| 3350        | CakSNP3350     | <i>Kabuli</i>    | <i>Ca_Kabuli_Chr02</i>       | 36069340                       | (T/C)       |
| 3351        | CakSNP3351     | <i>Kabuli</i>    | <i>Ca_Kabuli_Chr02</i>       | 36072247                       | (C/A)       |
| 3352        | CakSNP3352     | <i>Kabuli</i>    | <i>Ca_Kabuli_Chr02</i>       | 36074147                       | (T/C)       |

| <b>S.N.</b> | <b>SNP IDs</b> | <b>Cultivars</b> | <b>Chromosomes/scaffolds</b> | <b>Physical positions (bp)</b> | <b>SNPs</b> |
|-------------|----------------|------------------|------------------------------|--------------------------------|-------------|
| 3353        | CakSNP3353     | <i>Kabuli</i>    | <i>Ca_Kabuli_Chr02</i>       | 36088577                       | (A/T)       |
| 3354        | CakSNP3354     | <i>Kabuli</i>    | <i>Ca_Kabuli_Chr02</i>       | 36088623                       | (C/T)       |
| 3355        | CakSNP3355     | <i>Kabuli</i>    | <i>Ca_Kabuli_Chr02</i>       | 36088676                       | (T/C)       |
| 3356        | CakSNP3356     | <i>Kabuli</i>    | <i>Ca_Kabuli_Chr02</i>       | 36088853                       | (G/A)       |
| 3357        | CakSNP3357     | <i>Kabuli</i>    | <i>Ca_Kabuli_Chr02</i>       | 36101358                       | (A/G)       |
| 3358        | CakSNP3358     | <i>Kabuli</i>    | <i>Ca_Kabuli_Chr02</i>       | 36101379                       | (A/G)       |
| 3359        | CakSNP3359     | <i>Kabuli</i>    | <i>Ca_Kabuli_Chr02</i>       | 36101421                       | (C/T)       |
| 3360        | CakSNP3360     | <i>Kabuli</i>    | <i>Ca_Kabuli_Chr02</i>       | 36117695                       | (T/A)       |
| 3361        | CakSNP3361     | <i>Kabuli</i>    | <i>Ca_Kabuli_Chr02</i>       | 36117647                       | (G/A)       |
| 3362        | CakSNP3362     | <i>Kabuli</i>    | <i>Ca_Kabuli_Chr02</i>       | 36253581                       | (C/T)       |
| 3363        | CakSNP3363     | <i>Kabuli</i>    | <i>Ca_Kabuli_Chr02</i>       | 36276791                       | (G/A)       |
| 3364        | CakSNP3364     | <i>Kabuli</i>    | <i>Ca_Kabuli_Chr02</i>       | 36323575                       | (G/T)       |
| 3365        | CakSNP3365     | <i>Kabuli</i>    | <i>Ca_Kabuli_Chr02</i>       | 36326361                       | (A/C)       |
| 3366        | CakSNP3366     | <i>Kabuli</i>    | <i>Ca_Kabuli_Chr02</i>       | 36335252                       | (A/C)       |
| 3367        | CakSNP3367     | <i>Kabuli</i>    | <i>Ca_Kabuli_Chr02</i>       | 36343900                       | (C/T)       |
| 3368        | CakSNP3368     | <i>Kabuli</i>    | <i>Ca_Kabuli_Chr02</i>       | 36343933                       | (T/C)       |
| 3369        | CakSNP3369     | <i>Kabuli</i>    | <i>Ca_Kabuli_Chr02</i>       | 36346336                       | (A/G)       |
| 3370        | CakSNP3370     | <i>Kabuli</i>    | <i>Ca_Kabuli_Chr02</i>       | 36375224                       | (A/G)       |
| 3371        | CakSNP3371     | <i>Kabuli</i>    | <i>Ca_Kabuli_Chr02</i>       | 36375638                       | (A/G)       |
| 3372        | CakSNP3372     | <i>Kabuli</i>    | <i>Ca_Kabuli_Chr02</i>       | 36387189                       | (G/C)       |
| 3373        | CakSNP3373     | <i>Kabuli</i>    | <i>Ca_Kabuli_Chr02</i>       | 36387245                       | (T/C)       |
| 3374        | CakSNP3374     | <i>Kabuli</i>    | <i>Ca_Kabuli_Chr02</i>       | 36389041                       | (G/A)       |
| 3375        | CakSNP3375     | <i>Kabuli</i>    | <i>Ca_Kabuli_Chr02</i>       | 36389096                       | (C/T)       |
| 3376        | CakSNP3376     | <i>Kabuli</i>    | <i>Ca_Kabuli_Chr02</i>       | 36403788                       | (A/G)       |
| 3377        | CakSNP3377     | <i>Kabuli</i>    | <i>Ca_Kabuli_Chr02</i>       | 36427841                       | (C/T)       |
| 3378        | CakSNP3378     | <i>Kabuli</i>    | <i>Ca_Kabuli_Chr02</i>       | 36429512                       | (T/C)       |
| 3379        | CakSNP3379     | <i>Kabuli</i>    | <i>Ca_Kabuli_Chr02</i>       | 36438939                       | (T/G)       |
| 3380        | CakSNP3380     | <i>Kabuli</i>    | <i>Ca_Kabuli_Chr02</i>       | 36453691                       | (A/G)       |
| 3381        | CakSNP3381     | <i>Kabuli</i>    | <i>Ca_Kabuli_Chr02</i>       | 36453685                       | (G/A)       |
| 3382        | CakSNP3382     | <i>Kabuli</i>    | <i>Ca_Kabuli_Chr02</i>       | 36466837                       | (C/T)       |
| 3383        | CakSNP3383     | <i>Kabuli</i>    | <i>Ca_Kabuli_Chr02</i>       | 36466998                       | (A/G)       |
| 3384        | CakSNP3384     | <i>Kabuli</i>    | <i>Ca_Kabuli_Chr02</i>       | 36467100                       | (A/C)       |
| 3385        | CakSNP3385     | <i>Kabuli</i>    | <i>Ca_Kabuli_Chr02</i>       | 36468390                       | (A/G)       |
| 3386        | CakSNP3386     | <i>Kabuli</i>    | <i>Ca_Kabuli_Chr02</i>       | 36468505                       | (C/A)       |
| 3387        | CakSNP3387     | <i>Kabuli</i>    | <i>Ca_Kabuli_Chr02</i>       | 36469921                       | (A/G)       |
| 3388        | CakSNP3388     | <i>Kabuli</i>    | <i>Ca_Kabuli_Chr02</i>       | 36505316                       | (C/A)       |
| 3389        | CakSNP3389     | <i>Kabuli</i>    | <i>Ca_Kabuli_Chr02</i>       | 36521200                       | (T/C)       |
| 3390        | CakSNP3390     | <i>Kabuli</i>    | <i>Ca_Kabuli_Chr02</i>       | 36533821                       | (A/C)       |
| 3391        | CakSNP3391     | <i>Kabuli</i>    | <i>Ca_Kabuli_Chr02</i>       | 36533910                       | (G/A)       |



| <b>S.N.</b> | <b>SNP IDs</b> | <b>Cultivars</b> | <b>Chromosomes/scaffolds</b> | <b>Physical positions (bp)</b> | <b>SNPs</b> |
|-------------|----------------|------------------|------------------------------|--------------------------------|-------------|
| 3392        | CakSNP3392     | <i>Kabuli</i>    | <i>Ca_Kabuli_Chr02</i>       | 36554430                       | (G/A)       |
| 3393        | CakSNP3393     | <i>Kabuli</i>    | <i>Ca_Kabuli_Chr02</i>       | 36609730                       | (T/A)       |
| 3394        | CakSNP3394     | <i>Kabuli</i>    | <i>Ca_Kabuli_Chr02</i>       | 36609743                       | (C/T)       |
| 3395        | CakSNP3395     | <i>Kabuli</i>    | <i>Ca_Kabuli_Chr02</i>       | 36609744                       | (G/C)       |
| 3396        | CakSNP3396     | <i>Kabuli</i>    | <i>Ca_Kabuli_Chr02</i>       | 36609858                       | (C/G)       |
| 3397        | CakSNP3397     | <i>Kabuli</i>    | <i>Ca_Kabuli_Chr02</i>       | 36609950                       | (C/T)       |
| 3398        | CakSNP3398     | <i>Kabuli</i>    | <i>Ca_Kabuli_Chr02</i>       | 36609968                       | (C/T)       |
| 3399        | CakSNP3399     | <i>Kabuli</i>    | <i>Ca_Kabuli_Chr02</i>       | 36634234                       | (T/C)       |
| 3400        | CakSNP3400     | <i>Kabuli</i>    | <i>Ca_Kabuli_Chr02</i>       | 36634297                       | (C/G)       |
| 3401        | CakSNP3401     | <i>Kabuli</i>    | <i>Ca_Kabuli_Chr03</i>       | 171409                         | (A/T)       |
| 3402        | CakSNP3402     | <i>Kabuli</i>    | <i>Ca_Kabuli_Chr03</i>       | 171468                         | (A/G)       |
| 3403        | CakSNP3403     | <i>Kabuli</i>    | <i>Ca_Kabuli_Chr03</i>       | 171574                         | (C/A)       |
| 3404        | CakSNP3404     | <i>Kabuli</i>    | <i>Ca_Kabuli_Chr03</i>       | 171576                         | (G/T)       |
| 3405        | CakSNP3405     | <i>Kabuli</i>    | <i>Ca_Kabuli_Chr03</i>       | 171579                         | (C/T)       |
| 3406        | CakSNP3406     | <i>Kabuli</i>    | <i>Ca_Kabuli_Chr03</i>       | 171675                         | (T/A)       |
| 3407        | CakSNP3407     | <i>Kabuli</i>    | <i>Ca_Kabuli_Chr03</i>       | 208233                         | (C/A)       |
| 3408        | CakSNP3408     | <i>Kabuli</i>    | <i>Ca_Kabuli_Chr03</i>       | 220564                         | (A/G)       |
| 3409        | CakSNP3409     | <i>Kabuli</i>    | <i>Ca_Kabuli_Chr03</i>       | 220568                         | (A/T)       |
| 3410        | CakSNP3410     | <i>Kabuli</i>    | <i>Ca_Kabuli_Chr03</i>       | 220572                         | (T/C)       |
| 3411        | CakSNP3411     | <i>Kabuli</i>    | <i>Ca_Kabuli_Chr03</i>       | 220573                         | (G/T)       |
| 3412        | CakSNP3412     | <i>Kabuli</i>    | <i>Ca_Kabuli_Chr03</i>       | 223943                         | (G/A)       |
| 3413        | CakSNP3413     | <i>Kabuli</i>    | <i>Ca_Kabuli_Chr03</i>       | 223976                         | (G/C)       |
| 3414        | CakSNP3414     | <i>Kabuli</i>    | <i>Ca_Kabuli_Chr03</i>       | 286425                         | (G/T)       |
| 3415        | CakSNP3415     | <i>Kabuli</i>    | <i>Ca_Kabuli_Chr03</i>       | 419715                         | (T/G)       |
| 3416        | CakSNP3416     | <i>Kabuli</i>    | <i>Ca_Kabuli_Chr03</i>       | 988477                         | (G/A)       |
| 3417        | CakSNP3417     | <i>Kabuli</i>    | <i>Ca_Kabuli_Chr03</i>       | 988471                         | (T/C)       |
| 3418        | CakSNP3418     | <i>Kabuli</i>    | <i>Ca_Kabuli_Chr03</i>       | 1499038                        | (G/A)       |
| 3419        | CakSNP3419     | <i>Kabuli</i>    | <i>Ca_Kabuli_Chr03</i>       | 1499006                        | (A/G)       |
| 3420        | CakSNP3420     | <i>Kabuli</i>    | <i>Ca_Kabuli_Chr03</i>       | 1746388                        | (C/A)       |
| 3421        | CakSNP3421     | <i>Kabuli</i>    | <i>Ca_Kabuli_Chr03</i>       | 1746389                        | (A/G)       |
| 3422        | CakSNP3422     | <i>Kabuli</i>    | <i>Ca_Kabuli_Chr03</i>       | 1829412                        | (T/G)       |
| 3423        | CakSNP3423     | <i>Kabuli</i>    | <i>Ca_Kabuli_Chr03</i>       | 1829358                        | (T/C)       |
| 3424        | CakSNP3424     | <i>Kabuli</i>    | <i>Ca_Kabuli_Chr03</i>       | 1829352                        | (C/T)       |
| 3425        | CakSNP3425     | <i>Kabuli</i>    | <i>Ca_Kabuli_Chr03</i>       | 1831920                        | (T/G)       |
| 3426        | CakSNP3426     | <i>Kabuli</i>    | <i>Ca_Kabuli_Chr03</i>       | 1831866                        | (T/C)       |
| 3427        | CakSNP3427     | <i>Kabuli</i>    | <i>Ca_Kabuli_Chr03</i>       | 1831860                        | (C/T)       |
| 3428        | CakSNP3428     | <i>Kabuli</i>    | <i>Ca_Kabuli_Chr03</i>       | 1831931                        | (A/C)       |
| 3429        | CakSNP3429     | <i>Kabuli</i>    | <i>Ca_Kabuli_Chr03</i>       | 2097376                        | (T/G)       |
| 3430        | CakSNP3430     | <i>Kabuli</i>    | <i>Ca_Kabuli_Chr03</i>       | 2097413                        | (A/G)       |

| <b>S.N.</b> | <b>SNP IDs</b> | <b>Cultivars</b> | <b>Chromosomes/scaffolds</b> | <b>Physical positions (bp)</b> | <b>SNPs</b> |
|-------------|----------------|------------------|------------------------------|--------------------------------|-------------|
| 3431        | CakSNP3431     | <i>Kabuli</i>    | <i>Ca_Kabuli_Chr03</i>       | 2391515                        | (T/G)       |
| 3432        | CakSNP3432     | <i>Kabuli</i>    | <i>Ca_Kabuli_Chr03</i>       | 2423760                        | (T/C)       |
| 3433        | CakSNP3433     | <i>Kabuli</i>    | <i>Ca_Kabuli_Chr03</i>       | 2708703                        | (C/T)       |
| 3434        | CakSNP3434     | <i>Kabuli</i>    | <i>Ca_Kabuli_Chr03</i>       | 2825546                        | (G/T)       |
| 3435        | CakSNP3435     | <i>Kabuli</i>    | <i>Ca_Kabuli_Chr03</i>       | 2927148                        | (T/A)       |
| 3436        | CakSNP3436     | <i>Kabuli</i>    | <i>Ca_Kabuli_Chr03</i>       | 2927150                        | (A/T)       |
| 3437        | CakSNP3437     | <i>Kabuli</i>    | <i>Ca_Kabuli_Chr03</i>       | 2931027                        | (G/C)       |
| 3438        | CakSNP3438     | <i>Kabuli</i>    | <i>Ca_Kabuli_Chr03</i>       | 2931046                        | (C/T)       |
| 3439        | CakSNP3439     | <i>Kabuli</i>    | <i>Ca_Kabuli_Chr03</i>       | 2975179                        | (T/C)       |
| 3440        | CakSNP3440     | <i>Kabuli</i>    | <i>Ca_Kabuli_Chr03</i>       | 3280478                        | (C/T)       |
| 3441        | CakSNP3441     | <i>Kabuli</i>    | <i>Ca_Kabuli_Chr03</i>       | 3280500                        | (C/T)       |
| 3442        | CakSNP3442     | <i>Kabuli</i>    | <i>Ca_Kabuli_Chr03</i>       | 3280530                        | (G/A)       |
| 3443        | CakSNP3443     | <i>Kabuli</i>    | <i>Ca_Kabuli_Chr03</i>       | 3280595                        | (G/A)       |
| 3444        | CakSNP3444     | <i>Kabuli</i>    | <i>Ca_Kabuli_Chr03</i>       | 3617555                        | (G/A)       |
| 3445        | CakSNP3445     | <i>Kabuli</i>    | <i>Ca_Kabuli_Chr03</i>       | 3701394                        | (A/T)       |
| 3446        | CakSNP3446     | <i>Kabuli</i>    | <i>Ca_Kabuli_Chr03</i>       | 3701396                        | (C/T)       |
| 3447        | CakSNP3447     | <i>Kabuli</i>    | <i>Ca_Kabuli_Chr03</i>       | 3701398                        | (A/T)       |
| 3448        | CakSNP3448     | <i>Kabuli</i>    | <i>Ca_Kabuli_Chr03</i>       | 3701401                        | (A/T)       |
| 3449        | CakSNP3449     | <i>Kabuli</i>    | <i>Ca_Kabuli_Chr03</i>       | 3701403                        | (A/T)       |
| 3450        | CakSNP3450     | <i>Kabuli</i>    | <i>Ca_Kabuli_Chr03</i>       | 3701405                        | (G/T)       |
| 3451        | CakSNP3451     | <i>Kabuli</i>    | <i>Ca_Kabuli_Chr03</i>       | 3701415                        | (C/T)       |
| 3452        | CakSNP3452     | <i>Kabuli</i>    | <i>Ca_Kabuli_Chr03</i>       | 3701422                        | (C/T)       |
| 3453        | CakSNP3453     | <i>Kabuli</i>    | <i>Ca_Kabuli_Chr03</i>       | 3701426                        | (T/C)       |
| 3454        | CakSNP3454     | <i>Kabuli</i>    | <i>Ca_Kabuli_Chr03</i>       | 3701435                        | (A/T)       |
| 3455        | CakSNP3455     | <i>Kabuli</i>    | <i>Ca_Kabuli_Chr03</i>       | 3701436                        | (C/T)       |
| 3456        | CakSNP3456     | <i>Kabuli</i>    | <i>Ca_Kabuli_Chr03</i>       | 3701437                        | (A/T)       |
| 3457        | CakSNP3457     | <i>Kabuli</i>    | <i>Ca_Kabuli_Chr03</i>       | 3701440                        | (G/T)       |
| 3458        | CakSNP3458     | <i>Kabuli</i>    | <i>Ca_Kabuli_Chr03</i>       | 3701450                        | (C/T)       |
| 3459        | CakSNP3459     | <i>Kabuli</i>    | <i>Ca_Kabuli_Chr03</i>       | 3701375                        | (G/A)       |
| 3460        | CakSNP3460     | <i>Kabuli</i>    | <i>Ca_Kabuli_Chr03</i>       | 3701370                        | (G/A)       |
| 3461        | CakSNP3461     | <i>Kabuli</i>    | <i>Ca_Kabuli_Chr03</i>       | 3744908                        | (G/A)       |
| 3462        | CakSNP3462     | <i>Kabuli</i>    | <i>Ca_Kabuli_Chr03</i>       | 3764420                        | (T/A)       |
| 3463        | CakSNP3463     | <i>Kabuli</i>    | <i>Ca_Kabuli_Chr03</i>       | 3764508                        | (T/C)       |
| 3464        | CakSNP3464     | <i>Kabuli</i>    | <i>Ca_Kabuli_Chr03</i>       | 3764545                        | (C/T)       |
| 3465        | CakSNP3465     | <i>Kabuli</i>    | <i>Ca_Kabuli_Chr03</i>       | 4145743                        | (G/A)       |
| 3466        | CakSNP3466     | <i>Kabuli</i>    | <i>Ca_Kabuli_Chr03</i>       | 4178154                        | (C/T)       |
| 3467        | CakSNP3467     | <i>Kabuli</i>    | <i>Ca_Kabuli_Chr03</i>       | 4266739                        | (G/A)       |
| 3468        | CakSNP3468     | <i>Kabuli</i>    | <i>Ca_Kabuli_Chr03</i>       | 4266700                        | (T/G)       |
| 3469        | CakSNP3469     | <i>Kabuli</i>    | <i>Ca_Kabuli_Chr03</i>       | 4266691                        | (C/T)       |

| <b>S.N.</b> | <b>SNP IDs</b> | <b>Cultivars</b> | <b>Chromosomes/scaffolds</b> | <b>Physical positions (bp)</b> | <b>SNPs</b> |
|-------------|----------------|------------------|------------------------------|--------------------------------|-------------|
| 3470        | CakSNP3470     | <i>Kabuli</i>    | <i>Ca_Kabuli_Chr03</i>       | 4266686                        | (C/T)       |
| 3471        | CakSNP3471     | <i>Kabuli</i>    | <i>Ca_Kabuli_Chr03</i>       | 4266668                        | (G/A)       |
| 3472        | CakSNP3472     | <i>Kabuli</i>    | <i>Ca_Kabuli_Chr03</i>       | 4555124                        | (G/A)       |
| 3473        | CakSNP3473     | <i>Kabuli</i>    | <i>Ca_Kabuli_Chr03</i>       | 4555142                        | (T/A)       |
| 3474        | CakSNP3474     | <i>Kabuli</i>    | <i>Ca_Kabuli_Chr03</i>       | 4555167                        | (C/G)       |
| 3475        | CakSNP3475     | <i>Kabuli</i>    | <i>Ca_Kabuli_Chr03</i>       | 4555177                        | (C/T)       |
| 3476        | CakSNP3476     | <i>Kabuli</i>    | <i>Ca_Kabuli_Chr03</i>       | 4596815                        | (C/T)       |
| 3477        | CakSNP3477     | <i>Kabuli</i>    | <i>Ca_Kabuli_Chr03</i>       | 4596782                        | (A/G)       |
| 3478        | CakSNP3478     | <i>Kabuli</i>    | <i>Ca_Kabuli_Chr03</i>       | 4604649                        | (A/G)       |
| 3479        | CakSNP3479     | <i>Kabuli</i>    | <i>Ca_Kabuli_Chr03</i>       | 4606129                        | (T/A)       |
| 3480        | CakSNP3480     | <i>Kabuli</i>    | <i>Ca_Kabuli_Chr03</i>       | 4606128                        | (A/G)       |
| 3481        | CakSNP3481     | <i>Kabuli</i>    | <i>Ca_Kabuli_Chr03</i>       | 4629742                        | (A/T)       |
| 3482        | CakSNP3482     | <i>Kabuli</i>    | <i>Ca_Kabuli_Chr03</i>       | 4629747                        | (A/C)       |
| 3483        | CakSNP3483     | <i>Kabuli</i>    | <i>Ca_Kabuli_Chr03</i>       | 4654906                        | (C/T)       |
| 3484        | CakSNP3484     | <i>Kabuli</i>    | <i>Ca_Kabuli_Chr03</i>       | 4654898                        | (G/T)       |
| 3485        | CakSNP3485     | <i>Kabuli</i>    | <i>Ca_Kabuli_Chr03</i>       | 4654896                        | (T/C)       |
| 3486        | CakSNP3486     | <i>Kabuli</i>    | <i>Ca_Kabuli_Chr03</i>       | 4823828                        | (T/C)       |
| 3487        | CakSNP3487     | <i>Kabuli</i>    | <i>Ca_Kabuli_Chr03</i>       | 5224781                        | (A/G)       |
| 3488        | CakSNP3488     | <i>Kabuli</i>    | <i>Ca_Kabuli_Chr03</i>       | 5225052                        | (A/G)       |
| 3489        | CakSNP3489     | <i>Kabuli</i>    | <i>Ca_Kabuli_Chr03</i>       | 5225063                        | (G/T)       |
| 3490        | CakSNP3490     | <i>Kabuli</i>    | <i>Ca_Kabuli_Chr03</i>       | 5225108                        | (T/G)       |
| 3491        | CakSNP3491     | <i>Kabuli</i>    | <i>Ca_Kabuli_Chr03</i>       | 5225079                        | (G/A)       |
| 3492        | CakSNP3492     | <i>Kabuli</i>    | <i>Ca_Kabuli_Chr03</i>       | 5415782                        | (G/A)       |
| 3493        | CakSNP3493     | <i>Kabuli</i>    | <i>Ca_Kabuli_Chr03</i>       | 5436267                        | (A/G)       |
| 3494        | CakSNP3494     | <i>Kabuli</i>    | <i>Ca_Kabuli_Chr03</i>       | 5436272                        | (T/C)       |
| 3495        | CakSNP3495     | <i>Kabuli</i>    | <i>Ca_Kabuli_Chr03</i>       | 5436277                        | (C/T)       |
| 3496        | CakSNP3496     | <i>Kabuli</i>    | <i>Ca_Kabuli_Chr03</i>       | 5436288                        | (G/T)       |
| 3497        | CakSNP3497     | <i>Kabuli</i>    | <i>Ca_Kabuli_Chr03</i>       | 5436295                        | (G/A)       |
| 3498        | CakSNP3498     | <i>Kabuli</i>    | <i>Ca_Kabuli_Chr03</i>       | 5436296                        | (C/T)       |
| 3499        | CakSNP3499     | <i>Kabuli</i>    | <i>Ca_Kabuli_Chr03</i>       | 5436299                        | (A/C)       |
| 3500        | CakSNP3500     | <i>Kabuli</i>    | <i>Ca_Kabuli_Chr03</i>       | 5436331                        | (C/A)       |
| 3501        | CakSNP3501     | <i>Kabuli</i>    | <i>Ca_Kabuli_Chr03</i>       | 5514176                        | (A/G)       |
| 3502        | CakSNP3502     | <i>Kabuli</i>    | <i>Ca_Kabuli_Chr03</i>       | 5514287                        | (C/A)       |
| 3503        | CakSNP3503     | <i>Kabuli</i>    | <i>Ca_Kabuli_Chr03</i>       | 6169456                        | (G/T)       |
| 3504        | CakSNP3504     | <i>Kabuli</i>    | <i>Ca_Kabuli_Chr03</i>       | 6169539                        | (T/C)       |
| 3505        | CakSNP3505     | <i>Kabuli</i>    | <i>Ca_Kabuli_Chr03</i>       | 6169510                        | (A/C)       |
| 3506        | CakSNP3506     | <i>Kabuli</i>    | <i>Ca_Kabuli_Chr03</i>       | 6278104                        | (G/A)       |
| 3507        | CakSNP3507     | <i>Kabuli</i>    | <i>Ca_Kabuli_Chr03</i>       | 6467014                        | (G/A)       |
| 3508        | CakSNP3508     | <i>Kabuli</i>    | <i>Ca_Kabuli_Chr03</i>       | 6683646                        | (A/G)       |

| <b>S.N.</b> | <b>SNP IDs</b> | <b>Cultivars</b> | <b>Chromosomes/scaffolds</b> | <b>Physical positions (bp)</b> | <b>SNPs</b> |
|-------------|----------------|------------------|------------------------------|--------------------------------|-------------|
| 3509        | CakSNP3509     | <i>Kabuli</i>    | <i>Ca_Kabuli_Chr03</i>       | 6683587                        | (T/A)       |
| 3510        | CakSNP3510     | <i>Kabuli</i>    | <i>Ca_Kabuli_Chr03</i>       | 6828181                        | (A/T)       |
| 3511        | CakSNP3511     | <i>Kabuli</i>    | <i>Ca_Kabuli_Chr03</i>       | 6840644                        | (C/T)       |
| 3512        | CakSNP3512     | <i>Kabuli</i>    | <i>Ca_Kabuli_Chr03</i>       | 6894987                        | (C/A)       |
| 3513        | CakSNP3513     | <i>Kabuli</i>    | <i>Ca_Kabuli_Chr03</i>       | 6895085                        | (T/C)       |
| 3514        | CakSNP3514     | <i>Kabuli</i>    | <i>Ca_Kabuli_Chr03</i>       | 6899667                        | (T/C)       |
| 3515        | CakSNP3515     | <i>Kabuli</i>    | <i>Ca_Kabuli_Chr03</i>       | 7013492                        | (G/A)       |
| 3516        | CakSNP3516     | <i>Kabuli</i>    | <i>Ca_Kabuli_Chr03</i>       | 7015213                        | (T/G)       |
| 3517        | CakSNP3517     | <i>Kabuli</i>    | <i>Ca_Kabuli_Chr03</i>       | 7024620                        | (G/A)       |
| 3518        | CakSNP3518     | <i>Kabuli</i>    | <i>Ca_Kabuli_Chr03</i>       | 7204053                        | (G/A)       |
| 3519        | CakSNP3519     | <i>Kabuli</i>    | <i>Ca_Kabuli_Chr03</i>       | 7204071                        | (T/C)       |
| 3520        | CakSNP3520     | <i>Kabuli</i>    | <i>Ca_Kabuli_Chr03</i>       | 7204087                        | (C/T)       |
| 3521        | CakSNP3521     | <i>Kabuli</i>    | <i>Ca_Kabuli_Chr03</i>       | 7204088                        | (G/C)       |
| 3522        | CakSNP3522     | <i>Kabuli</i>    | <i>Ca_Kabuli_Chr03</i>       | 7204098                        | (G/A)       |
| 3523        | CakSNP3523     | <i>Kabuli</i>    | <i>Ca_Kabuli_Chr03</i>       | 7204099                        | (C/T)       |
| 3524        | CakSNP3524     | <i>Kabuli</i>    | <i>Ca_Kabuli_Chr03</i>       | 7204111                        | (G/A)       |
| 3525        | CakSNP3525     | <i>Kabuli</i>    | <i>Ca_Kabuli_Chr03</i>       | 7204112                        | (G/A)       |
| 3526        | CakSNP3526     | <i>Kabuli</i>    | <i>Ca_Kabuli_Chr03</i>       | 7204133                        | (G/T)       |
| 3527        | CakSNP3527     | <i>Kabuli</i>    | <i>Ca_Kabuli_Chr03</i>       | 7226689                        | (T/C)       |
| 3528        | CakSNP3528     | <i>Kabuli</i>    | <i>Ca_Kabuli_Chr03</i>       | 7226661                        | (G/T)       |
| 3529        | CakSNP3529     | <i>Kabuli</i>    | <i>Ca_Kabuli_Chr03</i>       | 7226632                        | (G/T)       |
| 3530        | CakSNP3530     | <i>Kabuli</i>    | <i>Ca_Kabuli_Chr03</i>       | 7246049                        | (T/G)       |
| 3531        | CakSNP3531     | <i>Kabuli</i>    | <i>Ca_Kabuli_Chr03</i>       | 7420705                        | (G/A)       |
| 3532        | CakSNP3532     | <i>Kabuli</i>    | <i>Ca_Kabuli_Chr03</i>       | 7433747                        | (C/A)       |
| 3533        | CakSNP3533     | <i>Kabuli</i>    | <i>Ca_Kabuli_Chr03</i>       | 7461833                        | (A/G)       |
| 3534        | CakSNP3534     | <i>Kabuli</i>    | <i>Ca_Kabuli_Chr03</i>       | 7482871                        | (C/T)       |
| 3535        | CakSNP3535     | <i>Kabuli</i>    | <i>Ca_Kabuli_Chr03</i>       | 7606843                        | (A/G)       |
| 3536        | CakSNP3536     | <i>Kabuli</i>    | <i>Ca_Kabuli_Chr03</i>       | 7606901                        | (T/C)       |
| 3537        | CakSNP3537     | <i>Kabuli</i>    | <i>Ca_Kabuli_Chr03</i>       | 7606905                        | (C/G)       |
| 3538        | CakSNP3538     | <i>Kabuli</i>    | <i>Ca_Kabuli_Chr03</i>       | 7608100                        | (A/G)       |
| 3539        | CakSNP3539     | <i>Kabuli</i>    | <i>Ca_Kabuli_Chr03</i>       | 7665123                        | (G/A)       |
| 3540        | CakSNP3540     | <i>Kabuli</i>    | <i>Ca_Kabuli_Chr03</i>       | 7665112                        | (C/T)       |
| 3541        | CakSNP3541     | <i>Kabuli</i>    | <i>Ca_Kabuli_Chr03</i>       | 7665100                        | (G/T)       |
| 3542        | CakSNP3542     | <i>Kabuli</i>    | <i>Ca_Kabuli_Chr03</i>       | 7665098                        | (C/T)       |
| 3543        | CakSNP3543     | <i>Kabuli</i>    | <i>Ca_Kabuli_Chr03</i>       | 7665090                        | (C/T)       |
| 3544        | CakSNP3544     | <i>Kabuli</i>    | <i>Ca_Kabuli_Chr03</i>       | 7665078                        | (G/A)       |
| 3545        | CakSNP3545     | <i>Kabuli</i>    | <i>Ca_Kabuli_Chr03</i>       | 7665075                        | (G/A)       |
| 3546        | CakSNP3546     | <i>Kabuli</i>    | <i>Ca_Kabuli_Chr03</i>       | 7665156                        | (G/A)       |
| 3547        | CakSNP3547     | <i>Kabuli</i>    | <i>Ca_Kabuli_Chr03</i>       | 7665149                        | (T/G)       |

| <b>S.N.</b> | <b>SNP IDs</b> | <b>Cultivars</b> | <b>Chromosomes/scaffolds</b> | <b>Physical positions (bp)</b> | <b>SNPs</b> |
|-------------|----------------|------------------|------------------------------|--------------------------------|-------------|
| 3548        | CakSNP3548     | <i>Kabuli</i>    | <i>Ca_Kabuli_Chr03</i>       | 7665142                        | (G/A)       |
| 3549        | CakSNP3549     | <i>Kabuli</i>    | <i>Ca_Kabuli_Chr03</i>       | 7665140                        | (G/T)       |
| 3550        | CakSNP3550     | <i>Kabuli</i>    | <i>Ca_Kabuli_Chr03</i>       | 7665157                        | (C/T)       |
| 3551        | CakSNP3551     | <i>Kabuli</i>    | <i>Ca_Kabuli_Chr03</i>       | 7694198                        | (C/T)       |
| 3552        | CakSNP3552     | <i>Kabuli</i>    | <i>Ca_Kabuli_Chr03</i>       | 7694297                        | (T/C)       |
| 3553        | CakSNP3553     | <i>Kabuli</i>    | <i>Ca_Kabuli_Chr03</i>       | 8536213                        | (T/C)       |
| 3554        | CakSNP3554     | <i>Kabuli</i>    | <i>Ca_Kabuli_Chr03</i>       | 8536275                        | (C/T)       |
| 3555        | CakSNP3555     | <i>Kabuli</i>    | <i>Ca_Kabuli_Chr03</i>       | 8536295                        | (A/T)       |
| 3556        | CakSNP3556     | <i>Kabuli</i>    | <i>Ca_Kabuli_Chr03</i>       | 8536301                        | (G/T)       |
| 3557        | CakSNP3557     | <i>Kabuli</i>    | <i>Ca_Kabuli_Chr03</i>       | 8536425                        | (C/A)       |
| 3558        | CakSNP3558     | <i>Kabuli</i>    | <i>Ca_Kabuli_Chr03</i>       | 8536498                        | (T/A)       |
| 3559        | CakSNP3559     | <i>Kabuli</i>    | <i>Ca_Kabuli_Chr03</i>       | 8536559                        | (T/C)       |
| 3560        | CakSNP3560     | <i>Kabuli</i>    | <i>Ca_Kabuli_Chr03</i>       | 8668628                        | (A/C)       |
| 3561        | CakSNP3561     | <i>Kabuli</i>    | <i>Ca_Kabuli_Chr03</i>       | 8669004                        | (A/T)       |
| 3562        | CakSNP3562     | <i>Kabuli</i>    | <i>Ca_Kabuli_Chr03</i>       | 8669132                        | (T/A)       |
| 3563        | CakSNP3563     | <i>Kabuli</i>    | <i>Ca_Kabuli_Chr03</i>       | 8697186                        | (A/G)       |
| 3564        | CakSNP3564     | <i>Kabuli</i>    | <i>Ca_Kabuli_Chr03</i>       | 8712381                        | (A/C)       |
| 3565        | CakSNP3565     | <i>Kabuli</i>    | <i>Ca_Kabuli_Chr03</i>       | 8933037                        | (T/C)       |
| 3566        | CakSNP3566     | <i>Kabuli</i>    | <i>Ca_Kabuli_Chr03</i>       | 8933084                        | (G/A)       |
| 3567        | CakSNP3567     | <i>Kabuli</i>    | <i>Ca_Kabuli_Chr03</i>       | 8933086                        | (C/A)       |
| 3568        | CakSNP3568     | <i>Kabuli</i>    | <i>Ca_Kabuli_Chr03</i>       | 8933221                        | (T/A)       |
| 3569        | CakSNP3569     | <i>Kabuli</i>    | <i>Ca_Kabuli_Chr03</i>       | 8933183                        | (A/G)       |
| 3570        | CakSNP3570     | <i>Kabuli</i>    | <i>Ca_Kabuli_Chr03</i>       | 8933255                        | (A/T)       |
| 3571        | CakSNP3571     | <i>Kabuli</i>    | <i>Ca_Kabuli_Chr03</i>       | 8933266                        | (G/T)       |
| 3572        | CakSNP3572     | <i>Kabuli</i>    | <i>Ca_Kabuli_Chr03</i>       | 8933409                        | (A/C)       |
| 3573        | CakSNP3573     | <i>Kabuli</i>    | <i>Ca_Kabuli_Chr03</i>       | 8933370                        | (A/G)       |
| 3574        | CakSNP3574     | <i>Kabuli</i>    | <i>Ca_Kabuli_Chr03</i>       | 8933355                        | (A/T)       |
| 3575        | CakSNP3575     | <i>Kabuli</i>    | <i>Ca_Kabuli_Chr03</i>       | 9221403                        | (G/A)       |
| 3576        | CakSNP3576     | <i>Kabuli</i>    | <i>Ca_Kabuli_Chr03</i>       | 9221528                        | (C/T)       |
| 3577        | CakSNP3577     | <i>Kabuli</i>    | <i>Ca_Kabuli_Chr03</i>       | 9221579                        | (G/C)       |
| 3578        | CakSNP3578     | <i>Kabuli</i>    | <i>Ca_Kabuli_Chr03</i>       | 9221580                        | (T/G)       |
| 3579        | CakSNP3579     | <i>Kabuli</i>    | <i>Ca_Kabuli_Chr03</i>       | 9223444                        | (G/C)       |
| 3580        | CakSNP3580     | <i>Kabuli</i>    | <i>Ca_Kabuli_Chr03</i>       | 9223875                        | (G/A)       |
| 3581        | CakSNP3581     | <i>Kabuli</i>    | <i>Ca_Kabuli_Chr03</i>       | 9224033                        | (C/A)       |
| 3582        | CakSNP3582     | <i>Kabuli</i>    | <i>Ca_Kabuli_Chr03</i>       | 9224011                        | (G/A)       |
| 3583        | CakSNP3583     | <i>Kabuli</i>    | <i>Ca_Kabuli_Chr03</i>       | 9296469                        | (T/G)       |
| 3584        | CakSNP3584     | <i>Kabuli</i>    | <i>Ca_Kabuli_Chr03</i>       | 9448525                        | (T/C)       |
| 3585        | CakSNP3585     | <i>Kabuli</i>    | <i>Ca_Kabuli_Chr03</i>       | 9577402                        | (G/A)       |
| 3586        | CakSNP3586     | <i>Kabuli</i>    | <i>Ca_Kabuli_Chr03</i>       | 9579805                        | (A/T)       |

| <b>S.N.</b> | <b>SNP IDs</b> | <b>Cultivars</b> | <b>Chromosomes/scaffolds</b> | <b>Physical positions (bp)</b> | <b>SNPs</b> |
|-------------|----------------|------------------|------------------------------|--------------------------------|-------------|
| 3587        | CakSNP3587     | <i>Kabuli</i>    | <i>Ca_Kabuli_Chr03</i>       | 9579808                        | (C/T)       |
| 3588        | CakSNP3588     | <i>Kabuli</i>    | <i>Ca_Kabuli_Chr03</i>       | 9579811                        | (G/C)       |
| 3589        | CakSNP3589     | <i>Kabuli</i>    | <i>Ca_Kabuli_Chr03</i>       | 9579817                        | (G/A)       |
| 3590        | CakSNP3590     | <i>Kabuli</i>    | <i>Ca_Kabuli_Chr03</i>       | 9579818                        | (G/T)       |
| 3591        | CakSNP3591     | <i>Kabuli</i>    | <i>Ca_Kabuli_Chr03</i>       | 9579824                        | (A/G)       |
| 3592        | CakSNP3592     | <i>Kabuli</i>    | <i>Ca_Kabuli_Chr03</i>       | 9579830                        | (T/A)       |
| 3593        | CakSNP3593     | <i>Kabuli</i>    | <i>Ca_Kabuli_Chr03</i>       | 9579831                        | (C/G)       |
| 3594        | CakSNP3594     | <i>Kabuli</i>    | <i>Ca_Kabuli_Chr03</i>       | 9579839                        | (G/A)       |
| 3595        | CakSNP3595     | <i>Kabuli</i>    | <i>Ca_Kabuli_Chr03</i>       | 9894316                        | (C/T)       |
| 3596        | CakSNP3596     | <i>Kabuli</i>    | <i>Ca_Kabuli_Chr03</i>       | 9894310                        | (C/A)       |
| 3597        | CakSNP3597     | <i>Kabuli</i>    | <i>Ca_Kabuli_Chr03</i>       | 10039539                       | (T/A)       |
| 3598        | CakSNP3598     | <i>Kabuli</i>    | <i>Ca_Kabuli_Chr03</i>       | 10105733                       | (A/G)       |
| 3599        | CakSNP3599     | <i>Kabuli</i>    | <i>Ca_Kabuli_Chr03</i>       | 10142152                       | (C/A)       |
| 3600        | CakSNP3600     | <i>Kabuli</i>    | <i>Ca_Kabuli_Chr03</i>       | 10159836                       | (A/C)       |
| 3601        | CakSNP3601     | <i>Kabuli</i>    | <i>Ca_Kabuli_Chr03</i>       | 10159859                       | (G/A)       |
| 3602        | CakSNP3602     | <i>Kabuli</i>    | <i>Ca_Kabuli_Chr03</i>       | 10159941                       | (C/A)       |
| 3603        | CakSNP3603     | <i>Kabuli</i>    | <i>Ca_Kabuli_Chr03</i>       | 10159943                       | (G/A)       |
| 3604        | CakSNP3604     | <i>Kabuli</i>    | <i>Ca_Kabuli_Chr03</i>       | 10159944                       | (T/C)       |
| 3605        | CakSNP3605     | <i>Kabuli</i>    | <i>Ca_Kabuli_Chr03</i>       | 10186893                       | (G/C)       |
| 3606        | CakSNP3606     | <i>Kabuli</i>    | <i>Ca_Kabuli_Chr03</i>       | 10186861                       | (G/T)       |
| 3607        | CakSNP3607     | <i>Kabuli</i>    | <i>Ca_Kabuli_Chr03</i>       | 10186857                       | (A/G)       |
| 3608        | CakSNP3608     | <i>Kabuli</i>    | <i>Ca_Kabuli_Chr03</i>       | 10186880                       | (A/G)       |
| 3609        | CakSNP3609     | <i>Kabuli</i>    | <i>Ca_Kabuli_Chr03</i>       | 10186889                       | (G/A)       |
| 3610        | CakSNP3610     | <i>Kabuli</i>    | <i>Ca_Kabuli_Chr03</i>       | 10186891                       | (C/G)       |
| 3611        | CakSNP3611     | <i>Kabuli</i>    | <i>Ca_Kabuli_Chr03</i>       | 10201361                       | (G/T)       |
| 3612        | CakSNP3612     | <i>Kabuli</i>    | <i>Ca_Kabuli_Chr03</i>       | 10722780                       | (G/T)       |
| 3613        | CakSNP3613     | <i>Kabuli</i>    | <i>Ca_Kabuli_Chr03</i>       | 10722849                       | (G/C)       |
| 3614        | CakSNP3614     | <i>Kabuli</i>    | <i>Ca_Kabuli_Chr03</i>       | 10722859                       | (G/A)       |
| 3615        | CakSNP3615     | <i>Kabuli</i>    | <i>Ca_Kabuli_Chr03</i>       | 11143751                       | (G/A)       |
| 3616        | CakSNP3616     | <i>Kabuli</i>    | <i>Ca_Kabuli_Chr03</i>       | 11143818                       | (G/A)       |
| 3617        | CakSNP3617     | <i>Kabuli</i>    | <i>Ca_Kabuli_Chr03</i>       | 11143816                       | (C/T)       |
| 3618        | CakSNP3618     | <i>Kabuli</i>    | <i>Ca_Kabuli_Chr03</i>       | 11376752                       | (C/A)       |
| 3619        | CakSNP3619     | <i>Kabuli</i>    | <i>Ca_Kabuli_Chr03</i>       | 11378141                       | (C/T)       |
| 3620        | CakSNP3620     | <i>Kabuli</i>    | <i>Ca_Kabuli_Chr03</i>       | 11378425                       | (G/T)       |
| 3621        | CakSNP3621     | <i>Kabuli</i>    | <i>Ca_Kabuli_Chr03</i>       | 11590767                       | (C/T)       |
| 3622        | CakSNP3622     | <i>Kabuli</i>    | <i>Ca_Kabuli_Chr03</i>       | 11590793                       | (C/T)       |
| 3623        | CakSNP3623     | <i>Kabuli</i>    | <i>Ca_Kabuli_Chr03</i>       | 11590817                       | (C/G)       |
| 3624        | CakSNP3624     | <i>Kabuli</i>    | <i>Ca_Kabuli_Chr03</i>       | 11590874                       | (A/G)       |
| 3625        | CakSNP3625     | <i>Kabuli</i>    | <i>Ca_Kabuli_Chr03</i>       | 11590860                       | (G/A)       |

| <b>S.N.</b> | <b>SNP IDs</b> | <b>Cultivars</b> | <b>Chromosomes/scaffolds</b> | <b>Physical positions (bp)</b> | <b>SNPs</b> |
|-------------|----------------|------------------|------------------------------|--------------------------------|-------------|
| 3626        | CakSNP3626     | <i>Kabuli</i>    | <i>Ca_Kabuli_Chr03</i>       | 11590832                       | (G/A)       |
| 3627        | CakSNP3627     | <i>Kabuli</i>    | <i>Ca_Kabuli_Chr03</i>       | 11590814                       | (T/C)       |
| 3628        | CakSNP3628     | <i>Kabuli</i>    | <i>Ca_Kabuli_Chr03</i>       | 11610500                       | (A/G)       |
| 3629        | CakSNP3629     | <i>Kabuli</i>    | <i>Ca_Kabuli_Chr03</i>       | 11610494                       | (C/T)       |
| 3630        | CakSNP3630     | <i>Kabuli</i>    | <i>Ca_Kabuli_Chr03</i>       | 11610460                       | (A/G)       |
| 3631        | CakSNP3631     | <i>Kabuli</i>    | <i>Ca_Kabuli_Chr03</i>       | 11610441                       | (G/T)       |
| 3632        | CakSNP3632     | <i>Kabuli</i>    | <i>Ca_Kabuli_Chr03</i>       | 11610481                       | (C/T)       |
| 3633        | CakSNP3633     | <i>Kabuli</i>    | <i>Ca_Kabuli_Chr03</i>       | 11610451                       | (C/T)       |
| 3634        | CakSNP3634     | <i>Kabuli</i>    | <i>Ca_Kabuli_Chr03</i>       | 11678625                       | (G/A)       |
| 3635        | CakSNP3635     | <i>Kabuli</i>    | <i>Ca_Kabuli_Chr03</i>       | 11684552                       | (G/A)       |
| 3636        | CakSNP3636     | <i>Kabuli</i>    | <i>Ca_Kabuli_Chr03</i>       | 11709777                       | (G/T)       |
| 3637        | CakSNP3637     | <i>Kabuli</i>    | <i>Ca_Kabuli_Chr03</i>       | 11811685                       | (A/G)       |
| 3638        | CakSNP3638     | <i>Kabuli</i>    | <i>Ca_Kabuli_Chr03</i>       | 12051826                       | (A/C)       |
| 3639        | CakSNP3639     | <i>Kabuli</i>    | <i>Ca_Kabuli_Chr03</i>       | 12058576                       | (T/C)       |
| 3640        | CakSNP3640     | <i>Kabuli</i>    | <i>Ca_Kabuli_Chr03</i>       | 12058756                       | (A/G)       |
| 3641        | CakSNP3641     | <i>Kabuli</i>    | <i>Ca_Kabuli_Chr03</i>       | 12058748                       | (A/T)       |
| 3642        | CakSNP3642     | <i>Kabuli</i>    | <i>Ca_Kabuli_Chr03</i>       | 12067458                       | (A/C)       |
| 3643        | CakSNP3643     | <i>Kabuli</i>    | <i>Ca_Kabuli_Chr03</i>       | 12069092                       | (T/G)       |
| 3644        | CakSNP3644     | <i>Kabuli</i>    | <i>Ca_Kabuli_Chr03</i>       | 12095571                       | (T/G)       |
| 3645        | CakSNP3645     | <i>Kabuli</i>    | <i>Ca_Kabuli_Chr03</i>       | 12124099                       | (G/A)       |
| 3646        | CakSNP3646     | <i>Kabuli</i>    | <i>Ca_Kabuli_Chr03</i>       | 12394742                       | (G/A)       |
| 3647        | CakSNP3647     | <i>Kabuli</i>    | <i>Ca_Kabuli_Chr03</i>       | 12599496                       | (A/C)       |
| 3648        | CakSNP3648     | <i>Kabuli</i>    | <i>Ca_Kabuli_Chr03</i>       | 12622503                       | (A/G)       |
| 3649        | CakSNP3649     | <i>Kabuli</i>    | <i>Ca_Kabuli_Chr03</i>       | 12622504                       | (G/T)       |
| 3650        | CakSNP3650     | <i>Kabuli</i>    | <i>Ca_Kabuli_Chr03</i>       | 12622518                       | (T/G)       |
| 3651        | CakSNP3651     | <i>Kabuli</i>    | <i>Ca_Kabuli_Chr03</i>       | 12622534                       | (C/T)       |
| 3652        | CakSNP3652     | <i>Kabuli</i>    | <i>Ca_Kabuli_Chr03</i>       | 12622550                       | (A/T)       |
| 3653        | CakSNP3653     | <i>Kabuli</i>    | <i>Ca_Kabuli_Chr03</i>       | 12622578                       | (G/A)       |
| 3654        | CakSNP3654     | <i>Kabuli</i>    | <i>Ca_Kabuli_Chr03</i>       | 12622567                       | (A/C)       |
| 3655        | CakSNP3655     | <i>Kabuli</i>    | <i>Ca_Kabuli_Chr03</i>       | 12622543                       | (G/A)       |
| 3656        | CakSNP3656     | <i>Kabuli</i>    | <i>Ca_Kabuli_Chr03</i>       | 12627120                       | (C/T)       |
| 3657        | CakSNP3657     | <i>Kabuli</i>    | <i>Ca_Kabuli_Chr03</i>       | 12627125                       | (T/C)       |
| 3658        | CakSNP3658     | <i>Kabuli</i>    | <i>Ca_Kabuli_Chr03</i>       | 12627131                       | (G/A)       |
| 3659        | CakSNP3659     | <i>Kabuli</i>    | <i>Ca_Kabuli_Chr03</i>       | 12627144                       | (G/A)       |
| 3660        | CakSNP3660     | <i>Kabuli</i>    | <i>Ca_Kabuli_Chr03</i>       | 12627165                       | (T/C)       |
| 3661        | CakSNP3661     | <i>Kabuli</i>    | <i>Ca_Kabuli_Chr03</i>       | 12627143                       | (T/C)       |
| 3662        | CakSNP3662     | <i>Kabuli</i>    | <i>Ca_Kabuli_Chr03</i>       | 12627164                       | (G/A)       |
| 3663        | CakSNP3663     | <i>Kabuli</i>    | <i>Ca_Kabuli_Chr03</i>       | 12627170                       | (C/G)       |
| 3664        | CakSNP3664     | <i>Kabuli</i>    | <i>Ca_Kabuli_Chr03</i>       | 12809390                       | (A/G)       |

| <b>S.N.</b> | <b>SNP IDs</b> | <b>Cultivars</b> | <b>Chromosomes/scaffolds</b> | <b>Physical positions (bp)</b> | <b>SNPs</b> |
|-------------|----------------|------------------|------------------------------|--------------------------------|-------------|
| 3665        | CakSNP3665     | <i>Kabuli</i>    | <i>Ca_Kabuli_Chr03</i>       | 12809794                       | (T/C)       |
| 3666        | CakSNP3666     | <i>Kabuli</i>    | <i>Ca_Kabuli_Chr03</i>       | 12814631                       | (C/T)       |
| 3667        | CakSNP3667     | <i>Kabuli</i>    | <i>Ca_Kabuli_Chr03</i>       | 12814603                       | (T/C)       |
| 3668        | CakSNP3668     | <i>Kabuli</i>    | <i>Ca_Kabuli_Chr03</i>       | 12814601                       | (A/C)       |
| 3669        | CakSNP3669     | <i>Kabuli</i>    | <i>Ca_Kabuli_Chr03</i>       | 12814600                       | (A/G)       |
| 3670        | CakSNP3670     | <i>Kabuli</i>    | <i>Ca_Kabuli_Chr03</i>       | 12814599                       | (A/T)       |
| 3671        | CakSNP3671     | <i>Kabuli</i>    | <i>Ca_Kabuli_Chr03</i>       | 12814597                       | (T/A)       |
| 3672        | CakSNP3672     | <i>Kabuli</i>    | <i>Ca_Kabuli_Chr03</i>       | 12814571                       | (C/A)       |
| 3673        | CakSNP3673     | <i>Kabuli</i>    | <i>Ca_Kabuli_Chr03</i>       | 12814558                       | (A/G)       |
| 3674        | CakSNP3674     | <i>Kabuli</i>    | <i>Ca_Kabuli_Chr03</i>       | 12897820                       | (C/T)       |
| 3675        | CakSNP3675     | <i>Kabuli</i>    | <i>Ca_Kabuli_Chr03</i>       | 12897831                       | (C/A)       |
| 3676        | CakSNP3676     | <i>Kabuli</i>    | <i>Ca_Kabuli_Chr03</i>       | 12897839                       | (G/A)       |
| 3677        | CakSNP3677     | <i>Kabuli</i>    | <i>Ca_Kabuli_Chr03</i>       | 12897841                       | (C/A)       |
| 3678        | CakSNP3678     | <i>Kabuli</i>    | <i>Ca_Kabuli_Chr03</i>       | 12897876                       | (C/T)       |
| 3679        | CakSNP3679     | <i>Kabuli</i>    | <i>Ca_Kabuli_Chr03</i>       | 12897881                       | (C/T)       |
| 3680        | CakSNP3680     | <i>Kabuli</i>    | <i>Ca_Kabuli_Chr03</i>       | 12897882                       | (T/G)       |
| 3681        | CakSNP3681     | <i>Kabuli</i>    | <i>Ca_Kabuli_Chr03</i>       | 12897926                       | (A/C)       |
| 3682        | CakSNP3682     | <i>Kabuli</i>    | <i>Ca_Kabuli_Chr03</i>       | 12897906                       | (C/A)       |
| 3683        | CakSNP3683     | <i>Kabuli</i>    | <i>Ca_Kabuli_Chr03</i>       | 12897887                       | (T/C)       |
| 3684        | CakSNP3684     | <i>Kabuli</i>    | <i>Ca_Kabuli_Chr03</i>       | 12897884                       | (C/T)       |
| 3685        | CakSNP3685     | <i>Kabuli</i>    | <i>Ca_Kabuli_Chr03</i>       | 12897883                       | (G/T)       |
| 3686        | CakSNP3686     | <i>Kabuli</i>    | <i>Ca_Kabuli_Chr03</i>       | 12897886                       | (G/A)       |
| 3687        | CakSNP3687     | <i>Kabuli</i>    | <i>Ca_Kabuli_Chr03</i>       | 13185541                       | (G/A)       |
| 3688        | CakSNP3688     | <i>Kabuli</i>    | <i>Ca_Kabuli_Chr03</i>       | 13185530                       | (C/T)       |
| 3689        | CakSNP3689     | <i>Kabuli</i>    | <i>Ca_Kabuli_Chr03</i>       | 13185496                       | (G/A)       |
| 3690        | CakSNP3690     | <i>Kabuli</i>    | <i>Ca_Kabuli_Chr03</i>       | 13185490                       | (G/A)       |
| 3691        | CakSNP3691     | <i>Kabuli</i>    | <i>Ca_Kabuli_Chr03</i>       | 13185493                       | (G/A)       |
| 3692        | CakSNP3692     | <i>Kabuli</i>    | <i>Ca_Kabuli_Chr03</i>       | 13185508                       | (C/T)       |
| 3693        | CakSNP3693     | <i>Kabuli</i>    | <i>Ca_Kabuli_Chr03</i>       | 13185516                       | (C/T)       |
| 3694        | CakSNP3694     | <i>Kabuli</i>    | <i>Ca_Kabuli_Chr03</i>       | 13185583                       | (T/C)       |
| 3695        | CakSNP3695     | <i>Kabuli</i>    | <i>Ca_Kabuli_Chr03</i>       | 13185581                       | (T/A)       |
| 3696        | CakSNP3696     | <i>Kabuli</i>    | <i>Ca_Kabuli_Chr03</i>       | 13185574                       | (G/A)       |
| 3697        | CakSNP3697     | <i>Kabuli</i>    | <i>Ca_Kabuli_Chr03</i>       | 13185560                       | (G/A)       |
| 3698        | CakSNP3698     | <i>Kabuli</i>    | <i>Ca_Kabuli_Chr03</i>       | 13185575                       | (C/T)       |
| 3699        | CakSNP3699     | <i>Kabuli</i>    | <i>Ca_Kabuli_Chr03</i>       | 13185582                       | (A/G)       |
| 3700        | CakSNP3700     | <i>Kabuli</i>    | <i>Ca_Kabuli_Chr03</i>       | 13185590                       | (C/A)       |
| 3701        | CakSNP3701     | <i>Kabuli</i>    | <i>Ca_Kabuli_Chr03</i>       | 13185591                       | (C/T)       |
| 3702        | CakSNP3702     | <i>Kabuli</i>    | <i>Ca_Kabuli_Chr03</i>       | 13185592                       | (A/C)       |
| 3703        | CakSNP3703     | <i>Kabuli</i>    | <i>Ca_Kabuli_Chr03</i>       | 13202989                       | (C/T)       |



| <b>S.N.</b> | <b>SNP IDs</b> | <b>Cultivars</b> | <b>Chromosomes/scaffolds</b> | <b>Physical positions (bp)</b> | <b>SNPs</b> |
|-------------|----------------|------------------|------------------------------|--------------------------------|-------------|
| 3704        | CakSNP3704     | <i>Kabuli</i>    | <i>Ca_Kabuli_Chr03</i>       | 13396925                       | (A/T)       |
| 3705        | CakSNP3705     | <i>Kabuli</i>    | <i>Ca_Kabuli_Chr03</i>       | 13397207                       | (A/C)       |
| 3706        | CakSNP3706     | <i>Kabuli</i>    | <i>Ca_Kabuli_Chr03</i>       | 13420776                       | (T/C)       |
| 3707        | CakSNP3707     | <i>Kabuli</i>    | <i>Ca_Kabuli_Chr03</i>       | 13420758                       | (A/G)       |
| 3708        | CakSNP3708     | <i>Kabuli</i>    | <i>Ca_Kabuli_Chr03</i>       | 13420756                       | (A/G)       |
| 3709        | CakSNP3709     | <i>Kabuli</i>    | <i>Ca_Kabuli_Chr03</i>       | 13617948                       | (A/C)       |
| 3710        | CakSNP3710     | <i>Kabuli</i>    | <i>Ca_Kabuli_Chr03</i>       | 14200381                       | (A/C)       |
| 3711        | CakSNP3711     | <i>Kabuli</i>    | <i>Ca_Kabuli_Chr03</i>       | 14465236                       | (T/G)       |
| 3712        | CakSNP3712     | <i>Kabuli</i>    | <i>Ca_Kabuli_Chr03</i>       | 14497374                       | (C/A)       |
| 3713        | CakSNP3713     | <i>Kabuli</i>    | <i>Ca_Kabuli_Chr03</i>       | 14653195                       | (G/T)       |
| 3714        | CakSNP3714     | <i>Kabuli</i>    | <i>Ca_Kabuli_Chr03</i>       | 14653194                       | (C/T)       |
| 3715        | CakSNP3715     | <i>Kabuli</i>    | <i>Ca_Kabuli_Chr03</i>       | 14653193                       | (T/G)       |
| 3716        | CakSNP3716     | <i>Kabuli</i>    | <i>Ca_Kabuli_Chr03</i>       | 14653270                       | (C/A)       |
| 3717        | CakSNP3717     | <i>Kabuli</i>    | <i>Ca_Kabuli_Chr03</i>       | 14653271                       | (G/A)       |
| 3718        | CakSNP3718     | <i>Kabuli</i>    | <i>Ca_Kabuli_Chr03</i>       | 14658175                       | (A/C)       |
| 3719        | CakSNP3719     | <i>Kabuli</i>    | <i>Ca_Kabuli_Chr03</i>       | 14812960                       | (A/C)       |
| 3720        | CakSNP3720     | <i>Kabuli</i>    | <i>Ca_Kabuli_Chr03</i>       | 14982667                       | (C/T)       |
| 3721        | CakSNP3721     | <i>Kabuli</i>    | <i>Ca_Kabuli_Chr03</i>       | 14982739                       | (A/T)       |
| 3722        | CakSNP3722     | <i>Kabuli</i>    | <i>Ca_Kabuli_Chr03</i>       | 15744906                       | (T/A)       |
| 3723        | CakSNP3723     | <i>Kabuli</i>    | <i>Ca_Kabuli_Chr03</i>       | 15745010                       | (C/T)       |
| 3724        | CakSNP3724     | <i>Kabuli</i>    | <i>Ca_Kabuli_Chr03</i>       | 15745017                       | (A/G)       |
| 3725        | CakSNP3725     | <i>Kabuli</i>    | <i>Ca_Kabuli_Chr03</i>       | 15745264                       | (G/C)       |
| 3726        | CakSNP3726     | <i>Kabuli</i>    | <i>Ca_Kabuli_Chr03</i>       | 15745311                       | (G/A)       |
| 3727        | CakSNP3727     | <i>Kabuli</i>    | <i>Ca_Kabuli_Chr03</i>       | 15757804                       | (T/C)       |
| 3728        | CakSNP3728     | <i>Kabuli</i>    | <i>Ca_Kabuli_Chr03</i>       | 15757829                       | (C/T)       |
| 3729        | CakSNP3729     | <i>Kabuli</i>    | <i>Ca_Kabuli_Chr03</i>       | 15757852                       | (A/C)       |
| 3730        | CakSNP3730     | <i>Kabuli</i>    | <i>Ca_Kabuli_Chr03</i>       | 16071411                       | (G/C)       |
| 3731        | CakSNP3731     | <i>Kabuli</i>    | <i>Ca_Kabuli_Chr03</i>       | 16396662                       | (C/G)       |
| 3732        | CakSNP3732     | <i>Kabuli</i>    | <i>Ca_Kabuli_Chr03</i>       | 16396673                       | (A/C)       |
| 3733        | CakSNP3733     | <i>Kabuli</i>    | <i>Ca_Kabuli_Chr03</i>       | 16436286                       | (T/A)       |
| 3734        | CakSNP3734     | <i>Kabuli</i>    | <i>Ca_Kabuli_Chr03</i>       | 16458123                       | (G/T)       |
| 3735        | CakSNP3735     | <i>Kabuli</i>    | <i>Ca_Kabuli_Chr03</i>       | 16458413                       | (T/A)       |
| 3736        | CakSNP3736     | <i>Kabuli</i>    | <i>Ca_Kabuli_Chr03</i>       | 16540328                       | (T/G)       |
| 3737        | CakSNP3737     | <i>Kabuli</i>    | <i>Ca_Kabuli_Chr03</i>       | 16568567                       | (A/G)       |
| 3738        | CakSNP3738     | <i>Kabuli</i>    | <i>Ca_Kabuli_Chr03</i>       | 16621498                       | (G/A)       |
| 3739        | CakSNP3739     | <i>Kabuli</i>    | <i>Ca_Kabuli_Chr03</i>       | 16621624                       | (G/T)       |
| 3740        | CakSNP3740     | <i>Kabuli</i>    | <i>Ca_Kabuli_Chr03</i>       | 16768867                       | (A/G)       |
| 3741        | CakSNP3741     | <i>Kabuli</i>    | <i>Ca_Kabuli_Chr03</i>       | 16768936                       | (A/G)       |
| 3742        | CakSNP3742     | <i>Kabuli</i>    | <i>Ca_Kabuli_Chr03</i>       | 16768917                       | (C/T)       |

| <b>S.N.</b> | <b>SNP IDs</b> | <b>Cultivars</b> | <b>Chromosomes/scaffolds</b> | <b>Physical positions (bp)</b> | <b>SNPs</b> |
|-------------|----------------|------------------|------------------------------|--------------------------------|-------------|
| 3743        | CakSNP3743     | <i>Kabuli</i>    | <i>Ca_Kabuli_Chr03</i>       | 16948510                       | (G/T)       |
| 3744        | CakSNP3744     | <i>Kabuli</i>    | <i>Ca_Kabuli_Chr03</i>       | 16948854                       | (A/T)       |
| 3745        | CakSNP3745     | <i>Kabuli</i>    | <i>Ca_Kabuli_Chr03</i>       | 16995243                       | (C/T)       |
| 3746        | CakSNP3746     | <i>Kabuli</i>    | <i>Ca_Kabuli_Chr03</i>       | 16997328                       | (G/A)       |
| 3747        | CakSNP3747     | <i>Kabuli</i>    | <i>Ca_Kabuli_Chr03</i>       | 16997331                       | (C/T)       |
| 3748        | CakSNP3748     | <i>Kabuli</i>    | <i>Ca_Kabuli_Chr03</i>       | 16997400                       | (T/C)       |
| 3749        | CakSNP3749     | <i>Kabuli</i>    | <i>Ca_Kabuli_Chr03</i>       | 17136071                       | (G/C)       |
| 3750        | CakSNP3750     | <i>Kabuli</i>    | <i>Ca_Kabuli_Chr03</i>       | 17136097                       | (T/C)       |
| 3751        | CakSNP3751     | <i>Kabuli</i>    | <i>Ca_Kabuli_Chr03</i>       | 17145639                       | (A/T)       |
| 3752        | CakSNP3752     | <i>Kabuli</i>    | <i>Ca_Kabuli_Chr03</i>       | 17145643                       | (G/T)       |
| 3753        | CakSNP3753     | <i>Kabuli</i>    | <i>Ca_Kabuli_Chr03</i>       | 17181213                       | (A/G)       |
| 3754        | CakSNP3754     | <i>Kabuli</i>    | <i>Ca_Kabuli_Chr03</i>       | 17185682                       | (A/G)       |
| 3755        | CakSNP3755     | <i>Kabuli</i>    | <i>Ca_Kabuli_Chr03</i>       | 17334924                       | (G/T)       |
| 3756        | CakSNP3756     | <i>Kabuli</i>    | <i>Ca_Kabuli_Chr03</i>       | 17335851                       | (A/C)       |
| 3757        | CakSNP3757     | <i>Kabuli</i>    | <i>Ca_Kabuli_Chr03</i>       | 17351553                       | (A/T)       |
| 3758        | CakSNP3758     | <i>Kabuli</i>    | <i>Ca_Kabuli_Chr03</i>       | 17351526                       | (A/C)       |
| 3759        | CakSNP3759     | <i>Kabuli</i>    | <i>Ca_Kabuli_Chr03</i>       | 17459986                       | (T/A)       |
| 3760        | CakSNP3760     | <i>Kabuli</i>    | <i>Ca_Kabuli_Chr03</i>       | 17460002                       | (G/A)       |
| 3761        | CakSNP3761     | <i>Kabuli</i>    | <i>Ca_Kabuli_Chr03</i>       | 17460012                       | (C/A)       |
| 3762        | CakSNP3762     | <i>Kabuli</i>    | <i>Ca_Kabuli_Chr03</i>       | 17574247                       | (C/T)       |
| 3763        | CakSNP3763     | <i>Kabuli</i>    | <i>Ca_Kabuli_Chr03</i>       | 17635591                       | (T/A)       |
| 3764        | CakSNP3764     | <i>Kabuli</i>    | <i>Ca_Kabuli_Chr03</i>       | 17635531                       | (T/C)       |
| 3765        | CakSNP3765     | <i>Kabuli</i>    | <i>Ca_Kabuli_Chr03</i>       | 17679409                       | (C/T)       |
| 3766        | CakSNP3766     | <i>Kabuli</i>    | <i>Ca_Kabuli_Chr03</i>       | 17679404                       | (C/T)       |
| 3767        | CakSNP3767     | <i>Kabuli</i>    | <i>Ca_Kabuli_Chr03</i>       | 17914677                       | (T/G)       |
| 3768        | CakSNP3768     | <i>Kabuli</i>    | <i>Ca_Kabuli_Chr03</i>       | 17936321                       | (T/C)       |
| 3769        | CakSNP3769     | <i>Kabuli</i>    | <i>Ca_Kabuli_Chr03</i>       | 17936729                       | (G/A)       |
| 3770        | CakSNP3770     | <i>Kabuli</i>    | <i>Ca_Kabuli_Chr03</i>       | 17936842                       | (A/G)       |
| 3771        | CakSNP3771     | <i>Kabuli</i>    | <i>Ca_Kabuli_Chr03</i>       | 17984978                       | (T/G)       |
| 3772        | CakSNP3772     | <i>Kabuli</i>    | <i>Ca_Kabuli_Chr03</i>       | 17986521                       | (G/C)       |
| 3773        | CakSNP3773     | <i>Kabuli</i>    | <i>Ca_Kabuli_Chr03</i>       | 17986525                       | (G/T)       |
| 3774        | CakSNP3774     | <i>Kabuli</i>    | <i>Ca_Kabuli_Chr03</i>       | 17986740                       | (T/C)       |
| 3775        | CakSNP3775     | <i>Kabuli</i>    | <i>Ca_Kabuli_Chr03</i>       | 18215321                       | (G/C)       |
| 3776        | CakSNP3776     | <i>Kabuli</i>    | <i>Ca_Kabuli_Chr03</i>       | 18215332                       | (T/C)       |
| 3777        | CakSNP3777     | <i>Kabuli</i>    | <i>Ca_Kabuli_Chr03</i>       | 18355427                       | (T/C)       |
| 3778        | CakSNP3778     | <i>Kabuli</i>    | <i>Ca_Kabuli_Chr03</i>       | 18355445                       | (T/C)       |
| 3779        | CakSNP3779     | <i>Kabuli</i>    | <i>Ca_Kabuli_Chr03</i>       | 18375547                       | (T/C)       |
| 3780        | CakSNP3780     | <i>Kabuli</i>    | <i>Ca_Kabuli_Chr03</i>       | 18375581                       | (G/C)       |
| 3781        | CakSNP3781     | <i>Kabuli</i>    | <i>Ca_Kabuli_Chr03</i>       | 18382404                       | (T/C)       |

| <b>S.N.</b> | <b>SNP IDs</b> | <b>Cultivars</b> | <b>Chromosomes/scaffolds</b> | <b>Physical positions (bp)</b> | <b>SNPs</b> |
|-------------|----------------|------------------|------------------------------|--------------------------------|-------------|
| 3782        | CakSNP3782     | <i>Kabuli</i>    | <i>Ca_Kabuli_Chr03</i>       | 18382438                       | (G/C)       |
| 3783        | CakSNP3783     | <i>Kabuli</i>    | <i>Ca_Kabuli_Chr03</i>       | 18383884                       | (T/C)       |
| 3784        | CakSNP3784     | <i>Kabuli</i>    | <i>Ca_Kabuli_Chr03</i>       | 18476006                       | (A/G)       |
| 3785        | CakSNP3785     | <i>Kabuli</i>    | <i>Ca_Kabuli_Chr03</i>       | 18476065                       | (C/A)       |
| 3786        | CakSNP3786     | <i>Kabuli</i>    | <i>Ca_Kabuli_Chr03</i>       | 18497633                       | (T/C)       |
| 3787        | CakSNP3787     | <i>Kabuli</i>    | <i>Ca_Kabuli_Chr03</i>       | 18573701                       | (T/A)       |
| 3788        | CakSNP3788     | <i>Kabuli</i>    | <i>Ca_Kabuli_Chr03</i>       | 18645114                       | (T/C)       |
| 3789        | CakSNP3789     | <i>Kabuli</i>    | <i>Ca_Kabuli_Chr03</i>       | 18687994                       | (T/A)       |
| 3790        | CakSNP3790     | <i>Kabuli</i>    | <i>Ca_Kabuli_Chr03</i>       | 18709398                       | (G/A)       |
| 3791        | CakSNP3791     | <i>Kabuli</i>    | <i>Ca_Kabuli_Chr03</i>       | 18731098                       | (T/C)       |
| 3792        | CakSNP3792     | <i>Kabuli</i>    | <i>Ca_Kabuli_Chr03</i>       | 18825708                       | (T/C)       |
| 3793        | CakSNP3793     | <i>Kabuli</i>    | <i>Ca_Kabuli_Chr03</i>       | 18825687                       | (T/C)       |
| 3794        | CakSNP3794     | <i>Kabuli</i>    | <i>Ca_Kabuli_Chr03</i>       | 18939425                       | (C/G)       |
| 3795        | CakSNP3795     | <i>Kabuli</i>    | <i>Ca_Kabuli_Chr03</i>       | 19372722                       | (G/T)       |
| 3796        | CakSNP3796     | <i>Kabuli</i>    | <i>Ca_Kabuli_Chr03</i>       | 19372739                       | (C/T)       |
| 3797        | CakSNP3797     | <i>Kabuli</i>    | <i>Ca_Kabuli_Chr03</i>       | 19400104                       | (T/C)       |
| 3798        | CakSNP3798     | <i>Kabuli</i>    | <i>Ca_Kabuli_Chr03</i>       | 19400121                       | (G/T)       |
| 3799        | CakSNP3799     | <i>Kabuli</i>    | <i>Ca_Kabuli_Chr03</i>       | 19400276                       | (C/T)       |
| 3800        | CakSNP3800     | <i>Kabuli</i>    | <i>Ca_Kabuli_Chr03</i>       | 19442839                       | (G/A)       |
| 3801        | CakSNP3801     | <i>Kabuli</i>    | <i>Ca_Kabuli_Chr03</i>       | 19442884                       | (G/C)       |
| 3802        | CakSNP3802     | <i>Kabuli</i>    | <i>Ca_Kabuli_Chr03</i>       | 19442941                       | (G/A)       |
| 3803        | CakSNP3803     | <i>Kabuli</i>    | <i>Ca_Kabuli_Chr03</i>       | 19445925                       | (A/G)       |
| 3804        | CakSNP3804     | <i>Kabuli</i>    | <i>Ca_Kabuli_Chr03</i>       | 19445920                       | (T/A)       |
| 3805        | CakSNP3805     | <i>Kabuli</i>    | <i>Ca_Kabuli_Chr03</i>       | 19448140                       | (A/G)       |
| 3806        | CakSNP3806     | <i>Kabuli</i>    | <i>Ca_Kabuli_Chr03</i>       | 19475095                       | (G/T)       |
| 3807        | CakSNP3807     | <i>Kabuli</i>    | <i>Ca_Kabuli_Chr03</i>       | 19571396                       | (C/A)       |
| 3808        | CakSNP3808     | <i>Kabuli</i>    | <i>Ca_Kabuli_Chr03</i>       | 19571382                       | (G/T)       |
| 3809        | CakSNP3809     | <i>Kabuli</i>    | <i>Ca_Kabuli_Chr03</i>       | 19571371                       | (A/G)       |
| 3810        | CakSNP3810     | <i>Kabuli</i>    | <i>Ca_Kabuli_Chr03</i>       | 19742600                       | (G/A)       |
| 3811        | CakSNP3811     | <i>Kabuli</i>    | <i>Ca_Kabuli_Chr03</i>       | 19742530                       | (C/T)       |
| 3812        | CakSNP3812     | <i>Kabuli</i>    | <i>Ca_Kabuli_Chr03</i>       | 19788512                       | (G/A)       |
| 3813        | CakSNP3813     | <i>Kabuli</i>    | <i>Ca_Kabuli_Chr03</i>       | 19802763                       | (C/T)       |
| 3814        | CakSNP3814     | <i>Kabuli</i>    | <i>Ca_Kabuli_Chr03</i>       | 19804985                       | (T/C)       |
| 3815        | CakSNP3815     | <i>Kabuli</i>    | <i>Ca_Kabuli_Chr03</i>       | 19805063                       | (A/C)       |
| 3816        | CakSNP3816     | <i>Kabuli</i>    | <i>Ca_Kabuli_Chr03</i>       | 19829510                       | (G/T)       |
| 3817        | CakSNP3817     | <i>Kabuli</i>    | <i>Ca_Kabuli_Chr03</i>       | 19850532                       | (T/C)       |
| 3818        | CakSNP3818     | <i>Kabuli</i>    | <i>Ca_Kabuli_Chr03</i>       | 19850589                       | (C/T)       |
| 3819        | CakSNP3819     | <i>Kabuli</i>    | <i>Ca_Kabuli_Chr03</i>       | 19855217                       | (T/C)       |
| 3820        | CakSNP3820     | <i>Kabuli</i>    | <i>Ca_Kabuli_Chr03</i>       | 19857613                       | (T/A)       |

| <b>S.N.</b> | <b>SNP IDs</b> | <b>Cultivars</b> | <b>Chromosomes/scaffolds</b> | <b>Physical positions (bp)</b> | <b>SNPs</b> |
|-------------|----------------|------------------|------------------------------|--------------------------------|-------------|
| 3821        | CakSNP3821     | <i>Kabuli</i>    | <i>Ca_Kabuli_Chr03</i>       | 19883898                       | (T/C)       |
| 3822        | CakSNP3822     | <i>Kabuli</i>    | <i>Ca_Kabuli_Chr03</i>       | 19883927                       | (A/G)       |
| 3823        | CakSNP3823     | <i>Kabuli</i>    | <i>Ca_Kabuli_Chr03</i>       | 19883936                       | (T/G)       |
| 3824        | CakSNP3824     | <i>Kabuli</i>    | <i>Ca_Kabuli_Chr03</i>       | 19896800                       | (C/T)       |
| 3825        | CakSNP3825     | <i>Kabuli</i>    | <i>Ca_Kabuli_Chr03</i>       | 19896849                       | (G/A)       |
| 3826        | CakSNP3826     | <i>Kabuli</i>    | <i>Ca_Kabuli_Chr03</i>       | 19907774                       | (T/C)       |
| 3827        | CakSNP3827     | <i>Kabuli</i>    | <i>Ca_Kabuli_Chr03</i>       | 19956343                       | (C/T)       |
| 3828        | CakSNP3828     | <i>Kabuli</i>    | <i>Ca_Kabuli_Chr03</i>       | 19956391                       | (C/T)       |
| 3829        | CakSNP3829     | <i>Kabuli</i>    | <i>Ca_Kabuli_Chr03</i>       | 19978343                       | (A/C)       |
| 3830        | CakSNP3830     | <i>Kabuli</i>    | <i>Ca_Kabuli_Chr03</i>       | 19978334                       | (A/C)       |
| 3831        | CakSNP3831     | <i>Kabuli</i>    | <i>Ca_Kabuli_Chr03</i>       | 19978407                       | (C/T)       |
| 3832        | CakSNP3832     | <i>Kabuli</i>    | <i>Ca_Kabuli_Chr03</i>       | 19979288                       | (A/T)       |
| 3833        | CakSNP3833     | <i>Kabuli</i>    | <i>Ca_Kabuli_Chr03</i>       | 19979318                       | (C/A)       |
| 3834        | CakSNP3834     | <i>Kabuli</i>    | <i>Ca_Kabuli_Chr03</i>       | 19979390                       | (A/T)       |
| 3835        | CakSNP3835     | <i>Kabuli</i>    | <i>Ca_Kabuli_Chr03</i>       | 20000967                       | (C/G)       |
| 3836        | CakSNP3836     | <i>Kabuli</i>    | <i>Ca_Kabuli_Chr03</i>       | 20030262                       | (T/C)       |
| 3837        | CakSNP3837     | <i>Kabuli</i>    | <i>Ca_Kabuli_Chr03</i>       | 20030298                       | (G/A)       |
| 3838        | CakSNP3838     | <i>Kabuli</i>    | <i>Ca_Kabuli_Chr03</i>       | 20030484                       | (A/G)       |
| 3839        | CakSNP3839     | <i>Kabuli</i>    | <i>Ca_Kabuli_Chr03</i>       | 20103039                       | (G/A)       |
| 3840        | CakSNP3840     | <i>Kabuli</i>    | <i>Ca_Kabuli_Chr03</i>       | 20103060                       | (C/T)       |
| 3841        | CakSNP3841     | <i>Kabuli</i>    | <i>Ca_Kabuli_Chr03</i>       | 20103126                       | (A/C)       |
| 3842        | CakSNP3842     | <i>Kabuli</i>    | <i>Ca_Kabuli_Chr03</i>       | 20172492                       | (C/T)       |
| 3843        | CakSNP3843     | <i>Kabuli</i>    | <i>Ca_Kabuli_Chr03</i>       | 20240118                       | (T/G)       |
| 3844        | CakSNP3844     | <i>Kabuli</i>    | <i>Ca_Kabuli_Chr03</i>       | 20242663                       | (C/T)       |
| 3845        | CakSNP3845     | <i>Kabuli</i>    | <i>Ca_Kabuli_Chr03</i>       | 20331659                       | (G/A)       |
| 3846        | CakSNP3846     | <i>Kabuli</i>    | <i>Ca_Kabuli_Chr03</i>       | 20365442                       | (A/C)       |
| 3847        | CakSNP3847     | <i>Kabuli</i>    | <i>Ca_Kabuli_Chr03</i>       | 20387399                       | (T/A)       |
| 3848        | CakSNP3848     | <i>Kabuli</i>    | <i>Ca_Kabuli_Chr03</i>       | 20387471                       | (A/G)       |
| 3849        | CakSNP3849     | <i>Kabuli</i>    | <i>Ca_Kabuli_Chr03</i>       | 20415660                       | (C/G)       |
| 3850        | CakSNP3850     | <i>Kabuli</i>    | <i>Ca_Kabuli_Chr03</i>       | 20415615                       | (A/G)       |
| 3851        | CakSNP3851     | <i>Kabuli</i>    | <i>Ca_Kabuli_Chr03</i>       | 20462715                       | (T/A)       |
| 3852        | CakSNP3852     | <i>Kabuli</i>    | <i>Ca_Kabuli_Chr03</i>       | 20490488                       | (T/C)       |
| 3853        | CakSNP3853     | <i>Kabuli</i>    | <i>Ca_Kabuli_Chr03</i>       | 20495810                       | (G/A)       |
| 3854        | CakSNP3854     | <i>Kabuli</i>    | <i>Ca_Kabuli_Chr03</i>       | 20503939                       | (G/T)       |
| 3855        | CakSNP3855     | <i>Kabuli</i>    | <i>Ca_Kabuli_Chr03</i>       | 20506663                       | (C/G)       |
| 3856        | CakSNP3856     | <i>Kabuli</i>    | <i>Ca_Kabuli_Chr03</i>       | 20552836                       | (T/G)       |
| 3857        | CakSNP3857     | <i>Kabuli</i>    | <i>Ca_Kabuli_Chr03</i>       | 20555942                       | (G/A)       |
| 3858        | CakSNP3858     | <i>Kabuli</i>    | <i>Ca_Kabuli_Chr03</i>       | 20690207                       | (T/G)       |
| 3859        | CakSNP3859     | <i>Kabuli</i>    | <i>Ca_Kabuli_Chr03</i>       | 20690185                       | (A/T)       |

| <b>S.N.</b> | <b>SNP IDs</b> | <b>Cultivars</b> | <b>Chromosomes/scaffolds</b> | <b>Physical positions (bp)</b> | <b>SNPs</b> |
|-------------|----------------|------------------|------------------------------|--------------------------------|-------------|
| 3860        | CakSNP3860     | <i>Kabuli</i>    | <i>Ca_Kabuli_Chr03</i>       | 20794236                       | (A/T)       |
| 3861        | CakSNP3861     | <i>Kabuli</i>    | <i>Ca_Kabuli_Chr03</i>       | 20794206                       | (A/T)       |
| 3862        | CakSNP3862     | <i>Kabuli</i>    | <i>Ca_Kabuli_Chr03</i>       | 20794984                       | (C/T)       |
| 3863        | CakSNP3863     | <i>Kabuli</i>    | <i>Ca_Kabuli_Chr03</i>       | 20795019                       | (C/T)       |
| 3864        | CakSNP3864     | <i>Kabuli</i>    | <i>Ca_Kabuli_Chr03</i>       | 20795014                       | (C/T)       |
| 3865        | CakSNP3865     | <i>Kabuli</i>    | <i>Ca_Kabuli_Chr03</i>       | 20794976                       | (A/C)       |
| 3866        | CakSNP3866     | <i>Kabuli</i>    | <i>Ca_Kabuli_Chr03</i>       | 20794993                       | (A/G)       |
| 3867        | CakSNP3867     | <i>Kabuli</i>    | <i>Ca_Kabuli_Chr03</i>       | 20794990                       | (G/A)       |
| 3868        | CakSNP3868     | <i>Kabuli</i>    | <i>Ca_Kabuli_Chr03</i>       | 20799767                       | (A/G)       |
| 3869        | CakSNP3869     | <i>Kabuli</i>    | <i>Ca_Kabuli_Chr03</i>       | 20799778                       | (C/T)       |
| 3870        | CakSNP3870     | <i>Kabuli</i>    | <i>Ca_Kabuli_Chr03</i>       | 20799811                       | (C/T)       |
| 3871        | CakSNP3871     | <i>Kabuli</i>    | <i>Ca_Kabuli_Chr03</i>       | 20799860                       | (A/G)       |
| 3872        | CakSNP3872     | <i>Kabuli</i>    | <i>Ca_Kabuli_Chr03</i>       | 20799841                       | (C/T)       |
| 3873        | CakSNP3873     | <i>Kabuli</i>    | <i>Ca_Kabuli_Chr03</i>       | 20799819                       | (C/T)       |
| 3874        | CakSNP3874     | <i>Kabuli</i>    | <i>Ca_Kabuli_Chr03</i>       | 20799820                       | (A/G)       |
| 3875        | CakSNP3875     | <i>Kabuli</i>    | <i>Ca_Kabuli_Chr03</i>       | 20822676                       | (T/C)       |
| 3876        | CakSNP3876     | <i>Kabuli</i>    | <i>Ca_Kabuli_Chr03</i>       | 20823146                       | (C/T)       |
| 3877        | CakSNP3877     | <i>Kabuli</i>    | <i>Ca_Kabuli_Chr03</i>       | 20828272                       | (G/T)       |
| 3878        | CakSNP3878     | <i>Kabuli</i>    | <i>Ca_Kabuli_Chr03</i>       | 20829399                       | (A/G)       |
| 3879        | CakSNP3879     | <i>Kabuli</i>    | <i>Ca_Kabuli_Chr03</i>       | 20829407                       | (T/G)       |
| 3880        | CakSNP3880     | <i>Kabuli</i>    | <i>Ca_Kabuli_Chr03</i>       | 20841298                       | (T/G)       |
| 3881        | CakSNP3881     | <i>Kabuli</i>    | <i>Ca_Kabuli_Chr03</i>       | 20841352                       | (C/T)       |
| 3882        | CakSNP3882     | <i>Kabuli</i>    | <i>Ca_Kabuli_Chr03</i>       | 20880294                       | (T/A)       |
| 3883        | CakSNP3883     | <i>Kabuli</i>    | <i>Ca_Kabuli_Chr03</i>       | 21020182                       | (A/G)       |
| 3884        | CakSNP3884     | <i>Kabuli</i>    | <i>Ca_Kabuli_Chr03</i>       | 21020191                       | (C/T)       |
| 3885        | CakSNP3885     | <i>Kabuli</i>    | <i>Ca_Kabuli_Chr03</i>       | 21069672                       | (A/G)       |
| 3886        | CakSNP3886     | <i>Kabuli</i>    | <i>Ca_Kabuli_Chr03</i>       | 21069714                       | (G/A)       |
| 3887        | CakSNP3887     | <i>Kabuli</i>    | <i>Ca_Kabuli_Chr03</i>       | 21069916                       | (C/T)       |
| 3888        | CakSNP3888     | <i>Kabuli</i>    | <i>Ca_Kabuli_Chr03</i>       | 21069917                       | (G/A)       |
| 3889        | CakSNP3889     | <i>Kabuli</i>    | <i>Ca_Kabuli_Chr03</i>       | 21069938                       | (C/A)       |
| 3890        | CakSNP3890     | <i>Kabuli</i>    | <i>Ca_Kabuli_Chr03</i>       | 21069959                       | (G/A)       |
| 3891        | CakSNP3891     | <i>Kabuli</i>    | <i>Ca_Kabuli_Chr03</i>       | 21069986                       | (A/C)       |
| 3892        | CakSNP3892     | <i>Kabuli</i>    | <i>Ca_Kabuli_Chr03</i>       | 21127162                       | (C/G)       |
| 3893        | CakSNP3893     | <i>Kabuli</i>    | <i>Ca_Kabuli_Chr03</i>       | 21127156                       | (T/G)       |
| 3894        | CakSNP3894     | <i>Kabuli</i>    | <i>Ca_Kabuli_Chr03</i>       | 21198607                       | (A/T)       |
| 3895        | CakSNP3895     | <i>Kabuli</i>    | <i>Ca_Kabuli_Chr03</i>       | 21210002                       | (T/A)       |
| 3896        | CakSNP3896     | <i>Kabuli</i>    | <i>Ca_Kabuli_Chr03</i>       | 21210005                       | (C/A)       |
| 3897        | CakSNP3897     | <i>Kabuli</i>    | <i>Ca_Kabuli_Chr03</i>       | 21210008                       | (T/C)       |
| 3898        | CakSNP3898     | <i>Kabuli</i>    | <i>Ca_Kabuli_Chr03</i>       | 21210049                       | (A/G)       |

| <b>S.N.</b> | <b>SNP IDs</b> | <b>Cultivars</b> | <b>Chromosomes/scaffolds</b> | <b>Physical positions (bp)</b> | <b>SNPs</b> |
|-------------|----------------|------------------|------------------------------|--------------------------------|-------------|
| 3899        | CakSNP3899     | <i>Kabuli</i>    | <i>Ca_Kabuli_Chr03</i>       | 21273368                       | (A/G)       |
| 3900        | CakSNP3900     | <i>Kabuli</i>    | <i>Ca_Kabuli_Chr03</i>       | 21288626                       | (C/A)       |
| 3901        | CakSNP3901     | <i>Kabuli</i>    | <i>Ca_Kabuli_Chr03</i>       | 21288652                       | (G/C)       |
| 3902        | CakSNP3902     | <i>Kabuli</i>    | <i>Ca_Kabuli_Chr03</i>       | 21288695                       | (G/A)       |
| 3903        | CakSNP3903     | <i>Kabuli</i>    | <i>Ca_Kabuli_Chr03</i>       | 21335892                       | (C/T)       |
| 3904        | CakSNP3904     | <i>Kabuli</i>    | <i>Ca_Kabuli_Chr03</i>       | 21382790                       | (G/A)       |
| 3905        | CakSNP3905     | <i>Kabuli</i>    | <i>Ca_Kabuli_Chr03</i>       | 21421082                       | (A/G)       |
| 3906        | CakSNP3906     | <i>Kabuli</i>    | <i>Ca_Kabuli_Chr03</i>       | 21421085                       | (G/A)       |
| 3907        | CakSNP3907     | <i>Kabuli</i>    | <i>Ca_Kabuli_Chr03</i>       | 21421146                       | (C/A)       |
| 3908        | CakSNP3908     | <i>Kabuli</i>    | <i>Ca_Kabuli_Chr03</i>       | 21421162                       | (G/A)       |
| 3909        | CakSNP3909     | <i>Kabuli</i>    | <i>Ca_Kabuli_Chr03</i>       | 21421358                       | (G/A)       |
| 3910        | CakSNP3910     | <i>Kabuli</i>    | <i>Ca_Kabuli_Chr03</i>       | 21421362                       | (T/A)       |
| 3911        | CakSNP3911     | <i>Kabuli</i>    | <i>Ca_Kabuli_Chr03</i>       | 21421369                       | (G/A)       |
| 3912        | CakSNP3912     | <i>Kabuli</i>    | <i>Ca_Kabuli_Chr03</i>       | 21421424                       | (G/A)       |
| 3913        | CakSNP3913     | <i>Kabuli</i>    | <i>Ca_Kabuli_Chr03</i>       | 21421440                       | (C/T)       |
| 3914        | CakSNP3914     | <i>Kabuli</i>    | <i>Ca_Kabuli_Chr03</i>       | 21450650                       | (A/G)       |
| 3915        | CakSNP3915     | <i>Kabuli</i>    | <i>Ca_Kabuli_Chr03</i>       | 21452017                       | (G/A)       |
| 3916        | CakSNP3916     | <i>Kabuli</i>    | <i>Ca_Kabuli_Chr03</i>       | 21468634                       | (G/A)       |
| 3917        | CakSNP3917     | <i>Kabuli</i>    | <i>Ca_Kabuli_Chr03</i>       | 21468692                       | (A/C)       |
| 3918        | CakSNP3918     | <i>Kabuli</i>    | <i>Ca_Kabuli_Chr03</i>       | 21470784                       | (C/T)       |
| 3919        | CakSNP3919     | <i>Kabuli</i>    | <i>Ca_Kabuli_Chr03</i>       | 21500178                       | (G/A)       |
| 3920        | CakSNP3920     | <i>Kabuli</i>    | <i>Ca_Kabuli_Chr03</i>       | 21500179                       | (A/T)       |
| 3921        | CakSNP3921     | <i>Kabuli</i>    | <i>Ca_Kabuli_Chr03</i>       | 21507422                       | (T/C)       |
| 3922        | CakSNP3922     | <i>Kabuli</i>    | <i>Ca_Kabuli_Chr03</i>       | 21524084                       | (T/C)       |
| 3923        | CakSNP3923     | <i>Kabuli</i>    | <i>Ca_Kabuli_Chr03</i>       | 21524192                       | (T/C)       |
| 3924        | CakSNP3924     | <i>Kabuli</i>    | <i>Ca_Kabuli_Chr03</i>       | 21524296                       | (G/T)       |
| 3925        | CakSNP3925     | <i>Kabuli</i>    | <i>Ca_Kabuli_Chr03</i>       | 21524379                       | (A/G)       |
| 3926        | CakSNP3926     | <i>Kabuli</i>    | <i>Ca_Kabuli_Chr03</i>       | 21525184                       | (C/T)       |
| 3927        | CakSNP3927     | <i>Kabuli</i>    | <i>Ca_Kabuli_Chr03</i>       | 21525177                       | (G/A)       |
| 3928        | CakSNP3928     | <i>Kabuli</i>    | <i>Ca_Kabuli_Chr03</i>       | 21558388                       | (A/G)       |
| 3929        | CakSNP3929     | <i>Kabuli</i>    | <i>Ca_Kabuli_Chr03</i>       | 21558357                       | (T/G)       |
| 3930        | CakSNP3930     | <i>Kabuli</i>    | <i>Ca_Kabuli_Chr03</i>       | 21627610                       | (T/C)       |
| 3931        | CakSNP3931     | <i>Kabuli</i>    | <i>Ca_Kabuli_Chr03</i>       | 21634275                       | (A/C)       |
| 3932        | CakSNP3932     | <i>Kabuli</i>    | <i>Ca_Kabuli_Chr03</i>       | 21634271                       | (A/G)       |
| 3933        | CakSNP3933     | <i>Kabuli</i>    | <i>Ca_Kabuli_Chr03</i>       | 21646863                       | (C/T)       |
| 3934        | CakSNP3934     | <i>Kabuli</i>    | <i>Ca_Kabuli_Chr03</i>       | 21646872                       | (T/C)       |
| 3935        | CakSNP3935     | <i>Kabuli</i>    | <i>Ca_Kabuli_Chr03</i>       | 21646893                       | (C/A)       |
| 3936        | CakSNP3936     | <i>Kabuli</i>    | <i>Ca_Kabuli_Chr03</i>       | 21646965                       | (C/T)       |
| 3937        | CakSNP3937     | <i>Kabuli</i>    | <i>Ca_Kabuli_Chr03</i>       | 21646962                       | (A/G)       |

| <b>S.N.</b> | <b>SNP IDs</b> | <b>Cultivars</b> | <b>Chromosomes/scaffolds</b> | <b>Physical positions (bp)</b> | <b>SNPs</b> |
|-------------|----------------|------------------|------------------------------|--------------------------------|-------------|
| 3938        | CakSNP3938     | <i>Kabuli</i>    | <i>Ca_Kabuli_Chr03</i>       | 21654592                       | (T/A)       |
| 3939        | CakSNP3939     | <i>Kabuli</i>    | <i>Ca_Kabuli_Chr03</i>       | 21686470                       | (C/T)       |
| 3940        | CakSNP3940     | <i>Kabuli</i>    | <i>Ca_Kabuli_Chr03</i>       | 21687439                       | (G/T)       |
| 3941        | CakSNP3941     | <i>Kabuli</i>    | <i>Ca_Kabuli_Chr03</i>       | 21687966                       | (C/A)       |
| 3942        | CakSNP3942     | <i>Kabuli</i>    | <i>Ca_Kabuli_Chr03</i>       | 21687961                       | (C/A)       |
| 3943        | CakSNP3943     | <i>Kabuli</i>    | <i>Ca_Kabuli_Chr03</i>       | 21687960                       | (G/A)       |
| 3944        | CakSNP3944     | <i>Kabuli</i>    | <i>Ca_Kabuli_Chr03</i>       | 21687959                       | (T/C)       |
| 3945        | CakSNP3945     | <i>Kabuli</i>    | <i>Ca_Kabuli_Chr03</i>       | 21687956                       | (C/T)       |
| 3946        | CakSNP3946     | <i>Kabuli</i>    | <i>Ca_Kabuli_Chr03</i>       | 21687953                       | (C/T)       |
| 3947        | CakSNP3947     | <i>Kabuli</i>    | <i>Ca_Kabuli_Chr03</i>       | 21741914                       | (C/A)       |
| 3948        | CakSNP3948     | <i>Kabuli</i>    | <i>Ca_Kabuli_Chr03</i>       | 21809395                       | (G/A)       |
| 3949        | CakSNP3949     | <i>Kabuli</i>    | <i>Ca_Kabuli_Chr03</i>       | 21809456                       | (T/C)       |
| 3950        | CakSNP3950     | <i>Kabuli</i>    | <i>Ca_Kabuli_Chr03</i>       | 21809457                       | (G/A)       |
| 3951        | CakSNP3951     | <i>Kabuli</i>    | <i>Ca_Kabuli_Chr03</i>       | 21809546                       | (T/A)       |
| 3952        | CakSNP3952     | <i>Kabuli</i>    | <i>Ca_Kabuli_Chr03</i>       | 21809505                       | (A/G)       |
| 3953        | CakSNP3953     | <i>Kabuli</i>    | <i>Ca_Kabuli_Chr03</i>       | 21809503                       | (T/C)       |
| 3954        | CakSNP3954     | <i>Kabuli</i>    | <i>Ca_Kabuli_Chr03</i>       | 21950053                       | (C/G)       |
| 3955        | CakSNP3955     | <i>Kabuli</i>    | <i>Ca_Kabuli_Chr03</i>       | 21950186                       | (A/G)       |
| 3956        | CakSNP3956     | <i>Kabuli</i>    | <i>Ca_Kabuli_Chr03</i>       | 21950164                       | (A/G)       |
| 3957        | CakSNP3957     | <i>Kabuli</i>    | <i>Ca_Kabuli_Chr03</i>       | 22008087                       | (G/A)       |
| 3958        | CakSNP3958     | <i>Kabuli</i>    | <i>Ca_Kabuli_Chr03</i>       | 22026111                       | (A/G)       |
| 3959        | CakSNP3959     | <i>Kabuli</i>    | <i>Ca_Kabuli_Chr03</i>       | 22026647                       | (A/G)       |
| 3960        | CakSNP3960     | <i>Kabuli</i>    | <i>Ca_Kabuli_Chr03</i>       | 22060199                       | (G/T)       |
| 3961        | CakSNP3961     | <i>Kabuli</i>    | <i>Ca_Kabuli_Chr03</i>       | 22061236                       | (A/G)       |
| 3962        | CakSNP3962     | <i>Kabuli</i>    | <i>Ca_Kabuli_Chr03</i>       | 22062029                       | (G/T)       |
| 3963        | CakSNP3963     | <i>Kabuli</i>    | <i>Ca_Kabuli_Chr03</i>       | 22062958                       | (T/C)       |
| 3964        | CakSNP3964     | <i>Kabuli</i>    | <i>Ca_Kabuli_Chr03</i>       | 22062965                       | (C/T)       |
| 3965        | CakSNP3965     | <i>Kabuli</i>    | <i>Ca_Kabuli_Chr03</i>       | 22063826                       | (G/A)       |
| 3966        | CakSNP3966     | <i>Kabuli</i>    | <i>Ca_Kabuli_Chr03</i>       | 22063829                       | (G/A)       |
| 3967        | CakSNP3967     | <i>Kabuli</i>    | <i>Ca_Kabuli_Chr03</i>       | 22063835                       | (C/T)       |
| 3968        | CakSNP3968     | <i>Kabuli</i>    | <i>Ca_Kabuli_Chr03</i>       | 22073381                       | (C/T)       |
| 3969        | CakSNP3969     | <i>Kabuli</i>    | <i>Ca_Kabuli_Chr03</i>       | 22073447                       | (T/A)       |
| 3970        | CakSNP3970     | <i>Kabuli</i>    | <i>Ca_Kabuli_Chr03</i>       | 22075779                       | (C/G)       |
| 3971        | CakSNP3971     | <i>Kabuli</i>    | <i>Ca_Kabuli_Chr03</i>       | 22075990                       | (T/C)       |
| 3972        | CakSNP3972     | <i>Kabuli</i>    | <i>Ca_Kabuli_Chr03</i>       | 22169816                       | (T/C)       |
| 3973        | CakSNP3973     | <i>Kabuli</i>    | <i>Ca_Kabuli_Chr03</i>       | 22188124                       | (T/C)       |
| 3974        | CakSNP3974     | <i>Kabuli</i>    | <i>Ca_Kabuli_Chr03</i>       | 22188169                       | (T/A)       |
| 3975        | CakSNP3975     | <i>Kabuli</i>    | <i>Ca_Kabuli_Chr03</i>       | 22200927                       | (T/C)       |
| 3976        | CakSNP3976     | <i>Kabuli</i>    | <i>Ca_Kabuli_Chr03</i>       | 22201045                       | (T/A)       |

| <b>S.N.</b> | <b>SNP IDs</b> | <b>Cultivars</b> | <b>Chromosomes/scaffolds</b> | <b>Physical positions (bp)</b> | <b>SNPs</b> |
|-------------|----------------|------------------|------------------------------|--------------------------------|-------------|
| 3977        | CakSNP3977     | <i>Kabuli</i>    | <i>Ca_Kabuli_Chr03</i>       | 22202317                       | (C/T)       |
| 3978        | CakSNP3978     | <i>Kabuli</i>    | <i>Ca_Kabuli_Chr03</i>       | 22202819                       | (T/C)       |
| 3979        | CakSNP3979     | <i>Kabuli</i>    | <i>Ca_Kabuli_Chr03</i>       | 22203460                       | (A/G)       |
| 3980        | CakSNP3980     | <i>Kabuli</i>    | <i>Ca_Kabuli_Chr03</i>       | 22225186                       | (C/A)       |
| 3981        | CakSNP3981     | <i>Kabuli</i>    | <i>Ca_Kabuli_Chr03</i>       | 22225154                       | (C/G)       |
| 3982        | CakSNP3982     | <i>Kabuli</i>    | <i>Ca_Kabuli_Chr03</i>       | 22225129                       | (C/G)       |
| 3983        | CakSNP3983     | <i>Kabuli</i>    | <i>Ca_Kabuli_Chr03</i>       | 22233428                       | (G/A)       |
| 3984        | CakSNP3984     | <i>Kabuli</i>    | <i>Ca_Kabuli_Chr03</i>       | 22233409                       | (T/C)       |
| 3985        | CakSNP3985     | <i>Kabuli</i>    | <i>Ca_Kabuli_Chr03</i>       | 22235801                       | (G/A)       |
| 3986        | CakSNP3986     | <i>Kabuli</i>    | <i>Ca_Kabuli_Chr03</i>       | 22253842                       | (T/C)       |
| 3987        | CakSNP3987     | <i>Kabuli</i>    | <i>Ca_Kabuli_Chr03</i>       | 22331057                       | (C/T)       |
| 3988        | CakSNP3988     | <i>Kabuli</i>    | <i>Ca_Kabuli_Chr03</i>       | 22346294                       | (T/C)       |
| 3989        | CakSNP3989     | <i>Kabuli</i>    | <i>Ca_Kabuli_Chr03</i>       | 22404660                       | (G/T)       |
| 3990        | CakSNP3990     | <i>Kabuli</i>    | <i>Ca_Kabuli_Chr03</i>       | 22527529                       | (A/C)       |
| 3991        | CakSNP3991     | <i>Kabuli</i>    | <i>Ca_Kabuli_Chr03</i>       | 22539384                       | (G/A)       |
| 3992        | CakSNP3992     | <i>Kabuli</i>    | <i>Ca_Kabuli_Chr03</i>       | 22539702                       | (C/T)       |
| 3993        | CakSNP3993     | <i>Kabuli</i>    | <i>Ca_Kabuli_Chr03</i>       | 22539885                       | (C/T)       |
| 3994        | CakSNP3994     | <i>Kabuli</i>    | <i>Ca_Kabuli_Chr03</i>       | 22539952                       | (G/A)       |
| 3995        | CakSNP3995     | <i>Kabuli</i>    | <i>Ca_Kabuli_Chr03</i>       | 22636201                       | (T/C)       |
| 3996        | CakSNP3996     | <i>Kabuli</i>    | <i>Ca_Kabuli_Chr03</i>       | 22646897                       | (T/C)       |
| 3997        | CakSNP3997     | <i>Kabuli</i>    | <i>Ca_Kabuli_Chr03</i>       | 22659924                       | (G/A)       |
| 3998        | CakSNP3998     | <i>Kabuli</i>    | <i>Ca_Kabuli_Chr03</i>       | 22681658                       | (G/A)       |
| 3999        | CakSNP3999     | <i>Kabuli</i>    | <i>Ca_Kabuli_Chr03</i>       | 22719470                       | (T/C)       |
| 4000        | CakSNP4000     | <i>Kabuli</i>    | <i>Ca_Kabuli_Chr03</i>       | 22719487                       | (T/C)       |
| 4001        | CakSNP4001     | <i>Kabuli</i>    | <i>Ca_Kabuli_Chr03</i>       | 22719494                       | (C/T)       |
| 4002        | CakSNP4002     | <i>Kabuli</i>    | <i>Ca_Kabuli_Chr03</i>       | 22719519                       | (G/A)       |
| 4003        | CakSNP4003     | <i>Kabuli</i>    | <i>Ca_Kabuli_Chr03</i>       | 22727393                       | (G/A)       |
| 4004        | CakSNP4004     | <i>Kabuli</i>    | <i>Ca_Kabuli_Chr03</i>       | 22727439                       | (A/C)       |
| 4005        | CakSNP4005     | <i>Kabuli</i>    | <i>Ca_Kabuli_Chr03</i>       | 22765806                       | (G/A)       |
| 4006        | CakSNP4006     | <i>Kabuli</i>    | <i>Ca_Kabuli_Chr03</i>       | 22765862                       | (T/C)       |
| 4007        | CakSNP4007     | <i>Kabuli</i>    | <i>Ca_Kabuli_Chr03</i>       | 22765987                       | (G/T)       |
| 4008        | CakSNP4008     | <i>Kabuli</i>    | <i>Ca_Kabuli_Chr03</i>       | 22798281                       | (T/G)       |
| 4009        | CakSNP4009     | <i>Kabuli</i>    | <i>Ca_Kabuli_Chr03</i>       | 22812717                       | (A/T)       |
| 4010        | CakSNP4010     | <i>Kabuli</i>    | <i>Ca_Kabuli_Chr03</i>       | 22846051                       | (G/A)       |
| 4011        | CakSNP4011     | <i>Kabuli</i>    | <i>Ca_Kabuli_Chr03</i>       | 22847885                       | (G/T)       |
| 4012        | CakSNP4012     | <i>Kabuli</i>    | <i>Ca_Kabuli_Chr03</i>       | 22847984                       | (A/G)       |
| 4013        | CakSNP4013     | <i>Kabuli</i>    | <i>Ca_Kabuli_Chr03</i>       | 22990523                       | (C/T)       |
| 4014        | CakSNP4014     | <i>Kabuli</i>    | <i>Ca_Kabuli_Chr03</i>       | 23028855                       | (A/G)       |
| 4015        | CakSNP4015     | <i>Kabuli</i>    | <i>Ca_Kabuli_Chr03</i>       | 23033373                       | (A/C)       |



| <b>S.N.</b> | <b>SNP IDs</b> | <b>Cultivars</b> | <b>Chromosomes/scaffolds</b> | <b>Physical positions (bp)</b> | <b>SNPs</b> |
|-------------|----------------|------------------|------------------------------|--------------------------------|-------------|
| 4016        | CakSNP4016     | <i>Kabuli</i>    | <i>Ca_Kabuli_Chr03</i>       | 23042249                       | (A/C)       |
| 4017        | CakSNP4017     | <i>Kabuli</i>    | <i>Ca_Kabuli_Chr03</i>       | 23053008                       | (C/G)       |
| 4018        | CakSNP4018     | <i>Kabuli</i>    | <i>Ca_Kabuli_Chr03</i>       | 23053005                       | (G/C)       |
| 4019        | CakSNP4019     | <i>Kabuli</i>    | <i>Ca_Kabuli_Chr03</i>       | 23053066                       | (A/C)       |
| 4020        | CakSNP4020     | <i>Kabuli</i>    | <i>Ca_Kabuli_Chr03</i>       | 23095498                       | (C/T)       |
| 4021        | CakSNP4021     | <i>Kabuli</i>    | <i>Ca_Kabuli_Chr03</i>       | 23273057                       | (T/A)       |
| 4022        | CakSNP4022     | <i>Kabuli</i>    | <i>Ca_Kabuli_Chr03</i>       | 23273069                       | (C/G)       |
| 4023        | CakSNP4023     | <i>Kabuli</i>    | <i>Ca_Kabuli_Chr03</i>       | 23327648                       | (C/T)       |
| 4024        | CakSNP4024     | <i>Kabuli</i>    | <i>Ca_Kabuli_Chr03</i>       | 23327700                       | (G/C)       |
| 4025        | CakSNP4025     | <i>Kabuli</i>    | <i>Ca_Kabuli_Chr03</i>       | 23331530                       | (T/G)       |
| 4026        | CakSNP4026     | <i>Kabuli</i>    | <i>Ca_Kabuli_Chr03</i>       | 23335788                       | (A/T)       |
| 4027        | CakSNP4027     | <i>Kabuli</i>    | <i>Ca_Kabuli_Chr03</i>       | 23335789                       | (T/G)       |
| 4028        | CakSNP4028     | <i>Kabuli</i>    | <i>Ca_Kabuli_Chr03</i>       | 23340171                       | (A/G)       |
| 4029        | CakSNP4029     | <i>Kabuli</i>    | <i>Ca_Kabuli_Chr03</i>       | 23340134                       | (G/A)       |
| 4030        | CakSNP4030     | <i>Kabuli</i>    | <i>Ca_Kabuli_Chr03</i>       | 23340133                       | (T/C)       |
| 4031        | CakSNP4031     | <i>Kabuli</i>    | <i>Ca_Kabuli_Chr03</i>       | 23341384                       | (T/G)       |
| 4032        | CakSNP4032     | <i>Kabuli</i>    | <i>Ca_Kabuli_Chr03</i>       | 23342297                       | (T/C)       |
| 4033        | CakSNP4033     | <i>Kabuli</i>    | <i>Ca_Kabuli_Chr03</i>       | 23342305                       | (T/C)       |
| 4034        | CakSNP4034     | <i>Kabuli</i>    | <i>Ca_Kabuli_Chr03</i>       | 23342338                       | (G/T)       |
| 4035        | CakSNP4035     | <i>Kabuli</i>    | <i>Ca_Kabuli_Chr03</i>       | 23342347                       | (G/A)       |
| 4036        | CakSNP4036     | <i>Kabuli</i>    | <i>Ca_Kabuli_Chr03</i>       | 23342350                       | (A/G)       |
| 4037        | CakSNP4037     | <i>Kabuli</i>    | <i>Ca_Kabuli_Chr03</i>       | 23342351                       | (T/C)       |
| 4038        | CakSNP4038     | <i>Kabuli</i>    | <i>Ca_Kabuli_Chr03</i>       | 23360857                       | (C/T)       |
| 4039        | CakSNP4039     | <i>Kabuli</i>    | <i>Ca_Kabuli_Chr03</i>       | 23400864                       | (A/C)       |
| 4040        | CakSNP4040     | <i>Kabuli</i>    | <i>Ca_Kabuli_Chr03</i>       | 23455008                       | (A/G)       |
| 4041        | CakSNP4041     | <i>Kabuli</i>    | <i>Ca_Kabuli_Chr03</i>       | 23455128                       | (A/G)       |
| 4042        | CakSNP4042     | <i>Kabuli</i>    | <i>Ca_Kabuli_Chr03</i>       | 23461370                       | (C/A)       |
| 4043        | CakSNP4043     | <i>Kabuli</i>    | <i>Ca_Kabuli_Chr03</i>       | 23555586                       | (C/A)       |
| 4044        | CakSNP4044     | <i>Kabuli</i>    | <i>Ca_Kabuli_Chr03</i>       | 23593288                       | (G/A)       |
| 4045        | CakSNP4045     | <i>Kabuli</i>    | <i>Ca_Kabuli_Chr03</i>       | 23593294                       | (T/C)       |
| 4046        | CakSNP4046     | <i>Kabuli</i>    | <i>Ca_Kabuli_Chr03</i>       | 23593309                       | (T/C)       |
| 4047        | CakSNP4047     | <i>Kabuli</i>    | <i>Ca_Kabuli_Chr03</i>       | 23593269                       | (T/C)       |
| 4048        | CakSNP4048     | <i>Kabuli</i>    | <i>Ca_Kabuli_Chr03</i>       | 23714158                       | (T/A)       |
| 4049        | CakSNP4049     | <i>Kabuli</i>    | <i>Ca_Kabuli_Chr03</i>       | 23714129                       | (C/A)       |
| 4050        | CakSNP4050     | <i>Kabuli</i>    | <i>Ca_Kabuli_Chr03</i>       | 23745324                       | (C/T)       |
| 4051        | CakSNP4051     | <i>Kabuli</i>    | <i>Ca_Kabuli_Chr03</i>       | 23792975                       | (A/T)       |
| 4052        | CakSNP4052     | <i>Kabuli</i>    | <i>Ca_Kabuli_Chr03</i>       | 23833683                       | (G/A)       |
| 4053        | CakSNP4053     | <i>Kabuli</i>    | <i>Ca_Kabuli_Chr03</i>       | 23833680                       | (G/C)       |
| 4054        | CakSNP4054     | <i>Kabuli</i>    | <i>Ca_Kabuli_Chr03</i>       | 23833668                       | (G/A)       |

| <b>S.N.</b> | <b>SNP IDs</b> | <b>Cultivars</b> | <b>Chromosomes/scaffolds</b> | <b>Physical positions (bp)</b> | <b>SNPs</b> |
|-------------|----------------|------------------|------------------------------|--------------------------------|-------------|
| 4055        | CakSNP4055     | <i>Kabuli</i>    | <i>Ca_Kabuli_Chr03</i>       | 23886582                       | (A/G)       |
| 4056        | CakSNP4056     | <i>Kabuli</i>    | <i>Ca_Kabuli_Chr03</i>       | 23918105                       | (T/C)       |
| 4057        | CakSNP4057     | <i>Kabuli</i>    | <i>Ca_Kabuli_Chr03</i>       | 23966110                       | (G/A)       |
| 4058        | CakSNP4058     | <i>Kabuli</i>    | <i>Ca_Kabuli_Chr03</i>       | 23997287                       | (A/T)       |
| 4059        | CakSNP4059     | <i>Kabuli</i>    | <i>Ca_Kabuli_Chr03</i>       | 24000847                       | (G/T)       |
| 4060        | CakSNP4060     | <i>Kabuli</i>    | <i>Ca_Kabuli_Chr03</i>       | 24000818                       | (T/C)       |
| 4061        | CakSNP4061     | <i>Kabuli</i>    | <i>Ca_Kabuli_Chr03</i>       | 24024560                       | (T/C)       |
| 4062        | CakSNP4062     | <i>Kabuli</i>    | <i>Ca_Kabuli_Chr03</i>       | 24024513                       | (A/C)       |
| 4063        | CakSNP4063     | <i>Kabuli</i>    | <i>Ca_Kabuli_Chr03</i>       | 24025900                       | (G/C)       |
| 4064        | CakSNP4064     | <i>Kabuli</i>    | <i>Ca_Kabuli_Chr03</i>       | 24025924                       | (T/G)       |
| 4065        | CakSNP4065     | <i>Kabuli</i>    | <i>Ca_Kabuli_Chr03</i>       | 24026428                       | (C/T)       |
| 4066        | CakSNP4066     | <i>Kabuli</i>    | <i>Ca_Kabuli_Chr03</i>       | 24041806                       | (C/T)       |
| 4067        | CakSNP4067     | <i>Kabuli</i>    | <i>Ca_Kabuli_Chr03</i>       | 24095268                       | (T/C)       |
| 4068        | CakSNP4068     | <i>Kabuli</i>    | <i>Ca_Kabuli_Chr03</i>       | 24099191                       | (C/G)       |
| 4069        | CakSNP4069     | <i>Kabuli</i>    | <i>Ca_Kabuli_Chr03</i>       | 24127222                       | (C/T)       |
| 4070        | CakSNP4070     | <i>Kabuli</i>    | <i>Ca_Kabuli_Chr03</i>       | 24127201                       | (A/C)       |
| 4071        | CakSNP4071     | <i>Kabuli</i>    | <i>Ca_Kabuli_Chr03</i>       | 24162153                       | (C/T)       |
| 4072        | CakSNP4072     | <i>Kabuli</i>    | <i>Ca_Kabuli_Chr03</i>       | 24194574                       | (C/T)       |
| 4073        | CakSNP4073     | <i>Kabuli</i>    | <i>Ca_Kabuli_Chr03</i>       | 24247161                       | (G/C)       |
| 4074        | CakSNP4074     | <i>Kabuli</i>    | <i>Ca_Kabuli_Chr03</i>       | 24297842                       | (T/G)       |
| 4075        | CakSNP4075     | <i>Kabuli</i>    | <i>Ca_Kabuli_Chr03</i>       | 24297894                       | (C/A)       |
| 4076        | CakSNP4076     | <i>Kabuli</i>    | <i>Ca_Kabuli_Chr03</i>       | 24417477                       | (T/G)       |
| 4077        | CakSNP4077     | <i>Kabuli</i>    | <i>Ca_Kabuli_Chr03</i>       | 24417507                       | (A/T)       |
| 4078        | CakSNP4078     | <i>Kabuli</i>    | <i>Ca_Kabuli_Chr03</i>       | 24418063                       | (G/T)       |
| 4079        | CakSNP4079     | <i>Kabuli</i>    | <i>Ca_Kabuli_Chr03</i>       | 24418111                       | (A/G)       |
| 4080        | CakSNP4080     | <i>Kabuli</i>    | <i>Ca_Kabuli_Chr03</i>       | 24418130                       | (T/A)       |
| 4081        | CakSNP4081     | <i>Kabuli</i>    | <i>Ca_Kabuli_Chr03</i>       | 24459669                       | (G/A)       |
| 4082        | CakSNP4082     | <i>Kabuli</i>    | <i>Ca_Kabuli_Chr03</i>       | 24515489                       | (T/G)       |
| 4083        | CakSNP4083     | <i>Kabuli</i>    | <i>Ca_Kabuli_Chr03</i>       | 24538726                       | (A/C)       |
| 4084        | CakSNP4084     | <i>Kabuli</i>    | <i>Ca_Kabuli_Chr03</i>       | 24540199                       | (A/G)       |
| 4085        | CakSNP4085     | <i>Kabuli</i>    | <i>Ca_Kabuli_Chr03</i>       | 24540304                       | (T/C)       |
| 4086        | CakSNP4086     | <i>Kabuli</i>    | <i>Ca_Kabuli_Chr03</i>       | 24637834                       | (G/T)       |
| 4087        | CakSNP4087     | <i>Kabuli</i>    | <i>Ca_Kabuli_Chr03</i>       | 24637837                       | (A/C)       |
| 4088        | CakSNP4088     | <i>Kabuli</i>    | <i>Ca_Kabuli_Chr03</i>       | 24664582                       | (G/T)       |
| 4089        | CakSNP4089     | <i>Kabuli</i>    | <i>Ca_Kabuli_Chr03</i>       | 24664550                       | (T/G)       |
| 4090        | CakSNP4090     | <i>Kabuli</i>    | <i>Ca_Kabuli_Chr03</i>       | 24664651                       | (G/T)       |
| 4091        | CakSNP4091     | <i>Kabuli</i>    | <i>Ca_Kabuli_Chr03</i>       | 24666594                       | (T/C)       |
| 4092        | CakSNP4092     | <i>Kabuli</i>    | <i>Ca_Kabuli_Chr03</i>       | 24763730                       | (A/G)       |
| 4093        | CakSNP4093     | <i>Kabuli</i>    | <i>Ca_Kabuli_Chr03</i>       | 24933940                       | (T/C)       |

| <b>S.N.</b> | <b>SNP IDs</b> | <b>Cultivars</b> | <b>Chromosomes/scaffolds</b> | <b>Physical positions (bp)</b> | <b>SNPs</b> |
|-------------|----------------|------------------|------------------------------|--------------------------------|-------------|
| 4094        | CakSNP4094     | <i>Kabuli</i>    | <i>Ca_Kabuli_Chr03</i>       | 24933901                       | (C/A)       |
| 4095        | CakSNP4095     | <i>Kabuli</i>    | <i>Ca_Kabuli_Chr03</i>       | 24933899                       | (G/T)       |
| 4096        | CakSNP4096     | <i>Kabuli</i>    | <i>Ca_Kabuli_Chr03</i>       | 24998316                       | (C/G)       |
| 4097        | CakSNP4097     | <i>Kabuli</i>    | <i>Ca_Kabuli_Chr03</i>       | 24998300                       | (C/T)       |
| 4098        | CakSNP4098     | <i>Kabuli</i>    | <i>Ca_Kabuli_Chr03</i>       | 25037746                       | (G/A)       |
| 4099        | CakSNP4099     | <i>Kabuli</i>    | <i>Ca_Kabuli_Chr03</i>       | 25046423                       | (C/G)       |
| 4100        | CakSNP4100     | <i>Kabuli</i>    | <i>Ca_Kabuli_Chr03</i>       | 25046421                       | (T/C)       |
| 4101        | CakSNP4101     | <i>Kabuli</i>    | <i>Ca_Kabuli_Chr03</i>       | 25055049                       | (C/T)       |
| 4102        | CakSNP4102     | <i>Kabuli</i>    | <i>Ca_Kabuli_Chr03</i>       | 25062250                       | (C/A)       |
| 4103        | CakSNP4103     | <i>Kabuli</i>    | <i>Ca_Kabuli_Chr03</i>       | 25110037                       | (T/G)       |
| 4104        | CakSNP4104     | <i>Kabuli</i>    | <i>Ca_Kabuli_Chr03</i>       | 25137192                       | (T/A)       |
| 4105        | CakSNP4105     | <i>Kabuli</i>    | <i>Ca_Kabuli_Chr03</i>       | 25147096                       | (G/A)       |
| 4106        | CakSNP4106     | <i>Kabuli</i>    | <i>Ca_Kabuli_Chr03</i>       | 25205548                       | (C/A)       |
| 4107        | CakSNP4107     | <i>Kabuli</i>    | <i>Ca_Kabuli_Chr03</i>       | 25241115                       | (G/A)       |
| 4108        | CakSNP4108     | <i>Kabuli</i>    | <i>Ca_Kabuli_Chr03</i>       | 25244194                       | (A/C)       |
| 4109        | CakSNP4109     | <i>Kabuli</i>    | <i>Ca_Kabuli_Chr03</i>       | 25270592                       | (C/G)       |
| 4110        | CakSNP4110     | <i>Kabuli</i>    | <i>Ca_Kabuli_Chr03</i>       | 25399911                       | (C/G)       |
| 4111        | CakSNP4111     | <i>Kabuli</i>    | <i>Ca_Kabuli_Chr03</i>       | 25457474                       | (T/A)       |
| 4112        | CakSNP4112     | <i>Kabuli</i>    | <i>Ca_Kabuli_Chr03</i>       | 25457494                       | (A/T)       |
| 4113        | CakSNP4113     | <i>Kabuli</i>    | <i>Ca_Kabuli_Chr03</i>       | 25457514                       | (C/A)       |
| 4114        | CakSNP4114     | <i>Kabuli</i>    | <i>Ca_Kabuli_Chr03</i>       | 25462227                       | (A/C)       |
| 4115        | CakSNP4115     | <i>Kabuli</i>    | <i>Ca_Kabuli_Chr03</i>       | 25504708                       | (A/G)       |
| 4116        | CakSNP4116     | <i>Kabuli</i>    | <i>Ca_Kabuli_Chr03</i>       | 25505438                       | (C/T)       |
| 4117        | CakSNP4117     | <i>Kabuli</i>    | <i>Ca_Kabuli_Chr03</i>       | 25505420                       | (G/T)       |
| 4118        | CakSNP4118     | <i>Kabuli</i>    | <i>Ca_Kabuli_Chr03</i>       | 25534044                       | (C/T)       |
| 4119        | CakSNP4119     | <i>Kabuli</i>    | <i>Ca_Kabuli_Chr03</i>       | 25538867                       | (T/C)       |
| 4120        | CakSNP4120     | <i>Kabuli</i>    | <i>Ca_Kabuli_Chr03</i>       | 25580072                       | (A/T)       |
| 4121        | CakSNP4121     | <i>Kabuli</i>    | <i>Ca_Kabuli_Chr03</i>       | 25614515                       | (T/G)       |
| 4122        | CakSNP4122     | <i>Kabuli</i>    | <i>Ca_Kabuli_Chr03</i>       | 25641434                       | (C/A)       |
| 4123        | CakSNP4123     | <i>Kabuli</i>    | <i>Ca_Kabuli_Chr03</i>       | 25641433                       | (G/A)       |
| 4124        | CakSNP4124     | <i>Kabuli</i>    | <i>Ca_Kabuli_Chr03</i>       | 25688341                       | (G/A)       |
| 4125        | CakSNP4125     | <i>Kabuli</i>    | <i>Ca_Kabuli_Chr03</i>       | 25702238                       | (G/A)       |
| 4126        | CakSNP4126     | <i>Kabuli</i>    | <i>Ca_Kabuli_Chr03</i>       | 25718829                       | (C/A)       |
| 4127        | CakSNP4127     | <i>Kabuli</i>    | <i>Ca_Kabuli_Chr03</i>       | 25718827                       | (T/A)       |
| 4128        | CakSNP4128     | <i>Kabuli</i>    | <i>Ca_Kabuli_Chr03</i>       | 25757693                       | (C/T)       |
| 4129        | CakSNP4129     | <i>Kabuli</i>    | <i>Ca_Kabuli_Chr03</i>       | 25987920                       | (T/G)       |
| 4130        | CakSNP4130     | <i>Kabuli</i>    | <i>Ca_Kabuli_Chr03</i>       | 26119425                       | (T/G)       |
| 4131        | CakSNP4131     | <i>Kabuli</i>    | <i>Ca_Kabuli_Chr03</i>       | 26119461                       | (C/T)       |
| 4132        | CakSNP4132     | <i>Kabuli</i>    | <i>Ca_Kabuli_Chr03</i>       | 26163449                       | (G/A)       |

| <b>S.N.</b> | <b>SNP IDs</b> | <b>Cultivars</b> | <b>Chromosomes/scaffolds</b> | <b>Physical positions (bp)</b> | <b>SNPs</b> |
|-------------|----------------|------------------|------------------------------|--------------------------------|-------------|
| 4133        | CakSNP4133     | <i>Kabuli</i>    | <i>Ca_Kabuli_Chr03</i>       | 26178592                       | (G/A)       |
| 4134        | CakSNP4134     | <i>Kabuli</i>    | <i>Ca_Kabuli_Chr03</i>       | 26198368                       | (G/A)       |
| 4135        | CakSNP4135     | <i>Kabuli</i>    | <i>Ca_Kabuli_Chr03</i>       | 26198372                       | (G/A)       |
| 4136        | CakSNP4136     | <i>Kabuli</i>    | <i>Ca_Kabuli_Chr03</i>       | 26293846                       | (A/G)       |
| 4137        | CakSNP4137     | <i>Kabuli</i>    | <i>Ca_Kabuli_Chr03</i>       | 26335889                       | (T/A)       |
| 4138        | CakSNP4138     | <i>Kabuli</i>    | <i>Ca_Kabuli_Chr03</i>       | 26339286                       | (T/C)       |
| 4139        | CakSNP4139     | <i>Kabuli</i>    | <i>Ca_Kabuli_Chr03</i>       | 26339449                       | (G/T)       |
| 4140        | CakSNP4140     | <i>Kabuli</i>    | <i>Ca_Kabuli_Chr03</i>       | 26562004                       | (A/G)       |
| 4141        | CakSNP4141     | <i>Kabuli</i>    | <i>Ca_Kabuli_Chr03</i>       | 26573902                       | (A/G)       |
| 4142        | CakSNP4142     | <i>Kabuli</i>    | <i>Ca_Kabuli_Chr03</i>       | 26574056                       | (C/T)       |
| 4143        | CakSNP4143     | <i>Kabuli</i>    | <i>Ca_Kabuli_Chr03</i>       | 26574068                       | (T/G)       |
| 4144        | CakSNP4144     | <i>Kabuli</i>    | <i>Ca_Kabuli_Chr03</i>       | 26574831                       | (A/G)       |
| 4145        | CakSNP4145     | <i>Kabuli</i>    | <i>Ca_Kabuli_Chr03</i>       | 26589678                       | (T/A)       |
| 4146        | CakSNP4146     | <i>Kabuli</i>    | <i>Ca_Kabuli_Chr03</i>       | 26627150                       | (T/G)       |
| 4147        | CakSNP4147     | <i>Kabuli</i>    | <i>Ca_Kabuli_Chr03</i>       | 26636553                       | (A/G)       |
| 4148        | CakSNP4148     | <i>Kabuli</i>    | <i>Ca_Kabuli_Chr03</i>       | 26646152                       | (C/T)       |
| 4149        | CakSNP4149     | <i>Kabuli</i>    | <i>Ca_Kabuli_Chr03</i>       | 26678343                       | (T/C)       |
| 4150        | CakSNP4150     | <i>Kabuli</i>    | <i>Ca_Kabuli_Chr03</i>       | 26678433                       | (T/G)       |
| 4151        | CakSNP4151     | <i>Kabuli</i>    | <i>Ca_Kabuli_Chr03</i>       | 26726897                       | (C/A)       |
| 4152        | CakSNP4152     | <i>Kabuli</i>    | <i>Ca_Kabuli_Chr03</i>       | 26758452                       | (C/A)       |
| 4153        | CakSNP4153     | <i>Kabuli</i>    | <i>Ca_Kabuli_Chr03</i>       | 26848870                       | (G/C)       |
| 4154        | CakSNP4154     | <i>Kabuli</i>    | <i>Ca_Kabuli_Chr03</i>       | 26849288                       | (T/A)       |
| 4155        | CakSNP4155     | <i>Kabuli</i>    | <i>Ca_Kabuli_Chr03</i>       | 26878028                       | (A/T)       |
| 4156        | CakSNP4156     | <i>Kabuli</i>    | <i>Ca_Kabuli_Chr03</i>       | 26900271                       | (T/A)       |
| 4157        | CakSNP4157     | <i>Kabuli</i>    | <i>Ca_Kabuli_Chr03</i>       | 26911443                       | (A/T)       |
| 4158        | CakSNP4158     | <i>Kabuli</i>    | <i>Ca_Kabuli_Chr03</i>       | 26911514                       | (A/G)       |
| 4159        | CakSNP4159     | <i>Kabuli</i>    | <i>Ca_Kabuli_Chr03</i>       | 26911723                       | (T/A)       |
| 4160        | CakSNP4160     | <i>Kabuli</i>    | <i>Ca_Kabuli_Chr03</i>       | 26911792                       | (A/G)       |
| 4161        | CakSNP4161     | <i>Kabuli</i>    | <i>Ca_Kabuli_Chr03</i>       | 26976249                       | (A/G)       |
| 4162        | CakSNP4162     | <i>Kabuli</i>    | <i>Ca_Kabuli_Chr03</i>       | 26976323                       | (G/A)       |
| 4163        | CakSNP4163     | <i>Kabuli</i>    | <i>Ca_Kabuli_Chr03</i>       | 27024215                       | (T/C)       |
| 4164        | CakSNP4164     | <i>Kabuli</i>    | <i>Ca_Kabuli_Chr03</i>       | 27047840                       | (A/G)       |
| 4165        | CakSNP4165     | <i>Kabuli</i>    | <i>Ca_Kabuli_Chr03</i>       | 27047847                       | (A/C)       |
| 4166        | CakSNP4166     | <i>Kabuli</i>    | <i>Ca_Kabuli_Chr03</i>       | 27063150                       | (A/C)       |
| 4167        | CakSNP4167     | <i>Kabuli</i>    | <i>Ca_Kabuli_Chr03</i>       | 27074842                       | (C/A)       |
| 4168        | CakSNP4168     | <i>Kabuli</i>    | <i>Ca_Kabuli_Chr03</i>       | 27074896                       | (A/T)       |
| 4169        | CakSNP4169     | <i>Kabuli</i>    | <i>Ca_Kabuli_Chr03</i>       | 27074931                       | (A/T)       |
| 4170        | CakSNP4170     | <i>Kabuli</i>    | <i>Ca_Kabuli_Chr03</i>       | 27074930                       | (A/C)       |
| 4171        | CakSNP4171     | <i>Kabuli</i>    | <i>Ca_Kabuli_Chr03</i>       | 27076716                       | (T/C)       |

| <b>S.N.</b> | <b>SNP IDs</b> | <b>Cultivars</b> | <b>Chromosomes/scaffolds</b> | <b>Physical positions (bp)</b> | <b>SNPs</b> |
|-------------|----------------|------------------|------------------------------|--------------------------------|-------------|
| 4172        | CakSNP4172     | <i>Kabuli</i>    | <i>Ca_Kabuli_Chr03</i>       | 27076735                       | (T/G)       |
| 4173        | CakSNP4173     | <i>Kabuli</i>    | <i>Ca_Kabuli_Chr03</i>       | 27076744                       | (C/A)       |
| 4174        | CakSNP4174     | <i>Kabuli</i>    | <i>Ca_Kabuli_Chr03</i>       | 27105637                       | (C/T)       |
| 4175        | CakSNP4175     | <i>Kabuli</i>    | <i>Ca_Kabuli_Chr03</i>       | 27157840                       | (T/A)       |
| 4176        | CakSNP4176     | <i>Kabuli</i>    | <i>Ca_Kabuli_Chr03</i>       | 27157848                       | (C/T)       |
| 4177        | CakSNP4177     | <i>Kabuli</i>    | <i>Ca_Kabuli_Chr03</i>       | 27161813                       | (T/G)       |
| 4178        | CakSNP4178     | <i>Kabuli</i>    | <i>Ca_Kabuli_Chr03</i>       | 27161801                       | (A/G)       |
| 4179        | CakSNP4179     | <i>Kabuli</i>    | <i>Ca_Kabuli_Chr03</i>       | 27194033                       | (C/T)       |
| 4180        | CakSNP4180     | <i>Kabuli</i>    | <i>Ca_Kabuli_Chr03</i>       | 27194069                       | (T/C)       |
| 4181        | CakSNP4181     | <i>Kabuli</i>    | <i>Ca_Kabuli_Chr03</i>       | 27338521                       | (T/C)       |
| 4182        | CakSNP4182     | <i>Kabuli</i>    | <i>Ca_Kabuli_Chr03</i>       | 27342919                       | (G/A)       |
| 4183        | CakSNP4183     | <i>Kabuli</i>    | <i>Ca_Kabuli_Chr03</i>       | 27391199                       | (G/A)       |
| 4184        | CakSNP4184     | <i>Kabuli</i>    | <i>Ca_Kabuli_Chr03</i>       | 27391354                       | (G/A)       |
| 4185        | CakSNP4185     | <i>Kabuli</i>    | <i>Ca_Kabuli_Chr03</i>       | 27391321                       | (A/G)       |
| 4186        | CakSNP4186     | <i>Kabuli</i>    | <i>Ca_Kabuli_Chr03</i>       | 27417561                       | (A/T)       |
| 4187        | CakSNP4187     | <i>Kabuli</i>    | <i>Ca_Kabuli_Chr03</i>       | 27420276                       | (T/C)       |
| 4188        | CakSNP4188     | <i>Kabuli</i>    | <i>Ca_Kabuli_Chr03</i>       | 27420330                       | (C/T)       |
| 4189        | CakSNP4189     | <i>Kabuli</i>    | <i>Ca_Kabuli_Chr03</i>       | 27435210                       | (T/C)       |
| 4190        | CakSNP4190     | <i>Kabuli</i>    | <i>Ca_Kabuli_Chr03</i>       | 27435209                       | (G/C)       |
| 4191        | CakSNP4191     | <i>Kabuli</i>    | <i>Ca_Kabuli_Chr03</i>       | 27435198                       | (T/A)       |
| 4192        | CakSNP4192     | <i>Kabuli</i>    | <i>Ca_Kabuli_Chr03</i>       | 27447685                       | (C/A)       |
| 4193        | CakSNP4193     | <i>Kabuli</i>    | <i>Ca_Kabuli_Chr03</i>       | 27470443                       | (A/C)       |
| 4194        | CakSNP4194     | <i>Kabuli</i>    | <i>Ca_Kabuli_Chr03</i>       | 27470439                       | (G/T)       |
| 4195        | CakSNP4195     | <i>Kabuli</i>    | <i>Ca_Kabuli_Chr03</i>       | 27597331                       | (A/C)       |
| 4196        | CakSNP4196     | <i>Kabuli</i>    | <i>Ca_Kabuli_Chr03</i>       | 27597409                       | (A/G)       |
| 4197        | CakSNP4197     | <i>Kabuli</i>    | <i>Ca_Kabuli_Chr03</i>       | 27632100                       | (G/A)       |
| 4198        | CakSNP4198     | <i>Kabuli</i>    | <i>Ca_Kabuli_Chr03</i>       | 27632169                       | (T/C)       |
| 4199        | CakSNP4199     | <i>Kabuli</i>    | <i>Ca_Kabuli_Chr03</i>       | 27654798                       | (A/C)       |
| 4200        | CakSNP4200     | <i>Kabuli</i>    | <i>Ca_Kabuli_Chr03</i>       | 27673727                       | (C/A)       |
| 4201        | CakSNP4201     | <i>Kabuli</i>    | <i>Ca_Kabuli_Chr03</i>       | 27681551                       | (T/C)       |
| 4202        | CakSNP4202     | <i>Kabuli</i>    | <i>Ca_Kabuli_Chr03</i>       | 27716396                       | (C/T)       |
| 4203        | CakSNP4203     | <i>Kabuli</i>    | <i>Ca_Kabuli_Chr03</i>       | 27763236                       | (C/T)       |
| 4204        | CakSNP4204     | <i>Kabuli</i>    | <i>Ca_Kabuli_Chr03</i>       | 27812571                       | (A/T)       |
| 4205        | CakSNP4205     | <i>Kabuli</i>    | <i>Ca_Kabuli_Chr03</i>       | 27876405                       | (A/G)       |
| 4206        | CakSNP4206     | <i>Kabuli</i>    | <i>Ca_Kabuli_Chr03</i>       | 27877442                       | (A/T)       |
| 4207        | CakSNP4207     | <i>Kabuli</i>    | <i>Ca_Kabuli_Chr03</i>       | 27877479                       | (C/T)       |
| 4208        | CakSNP4208     | <i>Kabuli</i>    | <i>Ca_Kabuli_Chr03</i>       | 27877480                       | (G/A)       |
| 4209        | CakSNP4209     | <i>Kabuli</i>    | <i>Ca_Kabuli_Chr03</i>       | 27877510                       | (G/A)       |
| 4210        | CakSNP4210     | <i>Kabuli</i>    | <i>Ca_Kabuli_Chr03</i>       | 27888817                       | (G/C)       |

| <b>S.N.</b> | <b>SNP IDs</b> | <b>Cultivars</b> | <b>Chromosomes/scaffolds</b> | <b>Physical positions (bp)</b> | <b>SNPs</b> |
|-------------|----------------|------------------|------------------------------|--------------------------------|-------------|
| 4211        | CakSNP4211     | <i>Kabuli</i>    | <i>Ca_Kabuli_Chr03</i>       | 27889107                       | (A/G)       |
| 4212        | CakSNP4212     | <i>Kabuli</i>    | <i>Ca_Kabuli_Chr03</i>       | 27890849                       | (C/T)       |
| 4213        | CakSNP4213     | <i>Kabuli</i>    | <i>Ca_Kabuli_Chr03</i>       | 27905944                       | (T/C)       |
| 4214        | CakSNP4214     | <i>Kabuli</i>    | <i>Ca_Kabuli_Chr03</i>       | 27905989                       | (G/A)       |
| 4215        | CakSNP4215     | <i>Kabuli</i>    | <i>Ca_Kabuli_Chr03</i>       | 27905995                       | (C/T)       |
| 4216        | CakSNP4216     | <i>Kabuli</i>    | <i>Ca_Kabuli_Chr03</i>       | 27906069                       | (C/A)       |
| 4217        | CakSNP4217     | <i>Kabuli</i>    | <i>Ca_Kabuli_Chr03</i>       | 27914409                       | (C/T)       |
| 4218        | CakSNP4218     | <i>Kabuli</i>    | <i>Ca_Kabuli_Chr03</i>       | 27968979                       | (T/G)       |
| 4219        | CakSNP4219     | <i>Kabuli</i>    | <i>Ca_Kabuli_Chr03</i>       | 27969014                       | (T/C)       |
| 4220        | CakSNP4220     | <i>Kabuli</i>    | <i>Ca_Kabuli_Chr03</i>       | 27969005                       | (A/G)       |
| 4221        | CakSNP4221     | <i>Kabuli</i>    | <i>Ca_Kabuli_Chr03</i>       | 27969207                       | (C/T)       |
| 4222        | CakSNP4222     | <i>Kabuli</i>    | <i>Ca_Kabuli_Chr03</i>       | 28044035                       | (A/T)       |
| 4223        | CakSNP4223     | <i>Kabuli</i>    | <i>Ca_Kabuli_Chr03</i>       | 28176380                       | (A/C)       |
| 4224        | CakSNP4224     | <i>Kabuli</i>    | <i>Ca_Kabuli_Chr03</i>       | 28176333                       | (C/A)       |
| 4225        | CakSNP4225     | <i>Kabuli</i>    | <i>Ca_Kabuli_Chr03</i>       | 28277991                       | (C/G)       |
| 4226        | CakSNP4226     | <i>Kabuli</i>    | <i>Ca_Kabuli_Chr03</i>       | 28278018                       | (C/G)       |
| 4227        | CakSNP4227     | <i>Kabuli</i>    | <i>Ca_Kabuli_Chr03</i>       | 28374024                       | (C/T)       |
| 4228        | CakSNP4228     | <i>Kabuli</i>    | <i>Ca_Kabuli_Chr03</i>       | 28375082                       | (G/A)       |
| 4229        | CakSNP4229     | <i>Kabuli</i>    | <i>Ca_Kabuli_Chr03</i>       | 28409001                       | (G/A)       |
| 4230        | CakSNP4230     | <i>Kabuli</i>    | <i>Ca_Kabuli_Chr03</i>       | 28420948                       | (C/T)       |
| 4231        | CakSNP4231     | <i>Kabuli</i>    | <i>Ca_Kabuli_Chr03</i>       | 28478044                       | (C/T)       |
| 4232        | CakSNP4232     | <i>Kabuli</i>    | <i>Ca_Kabuli_Chr03</i>       | 28478539                       | (C/G)       |
| 4233        | CakSNP4233     | <i>Kabuli</i>    | <i>Ca_Kabuli_Chr03</i>       | 28478569                       | (C/A)       |
| 4234        | CakSNP4234     | <i>Kabuli</i>    | <i>Ca_Kabuli_Chr03</i>       | 28602055                       | (C/A)       |
| 4235        | CakSNP4235     | <i>Kabuli</i>    | <i>Ca_Kabuli_Chr03</i>       | 28603892                       | (T/C)       |
| 4236        | CakSNP4236     | <i>Kabuli</i>    | <i>Ca_Kabuli_Chr03</i>       | 28613067                       | (A/G)       |
| 4237        | CakSNP4237     | <i>Kabuli</i>    | <i>Ca_Kabuli_Chr03</i>       | 28614784                       | (A/G)       |
| 4238        | CakSNP4238     | <i>Kabuli</i>    | <i>Ca_Kabuli_Chr03</i>       | 28614919                       | (A/T)       |
| 4239        | CakSNP4239     | <i>Kabuli</i>    | <i>Ca_Kabuli_Chr03</i>       | 28680858                       | (C/T)       |
| 4240        | CakSNP4240     | <i>Kabuli</i>    | <i>Ca_Kabuli_Chr03</i>       | 28706106                       | (T/A)       |
| 4241        | CakSNP4241     | <i>Kabuli</i>    | <i>Ca_Kabuli_Chr03</i>       | 28706292                       | (G/C)       |
| 4242        | CakSNP4242     | <i>Kabuli</i>    | <i>Ca_Kabuli_Chr03</i>       | 28712993                       | (T/C)       |
| 4243        | CakSNP4243     | <i>Kabuli</i>    | <i>Ca_Kabuli_Chr03</i>       | 28716003                       | (C/T)       |
| 4244        | CakSNP4244     | <i>Kabuli</i>    | <i>Ca_Kabuli_Chr03</i>       | 28716027                       | (A/T)       |
| 4245        | CakSNP4245     | <i>Kabuli</i>    | <i>Ca_Kabuli_Chr03</i>       | 28716028                       | (A/T)       |
| 4246        | CakSNP4246     | <i>Kabuli</i>    | <i>Ca_Kabuli_Chr03</i>       | 28716029                       | (A/G)       |
| 4247        | CakSNP4247     | <i>Kabuli</i>    | <i>Ca_Kabuli_Chr03</i>       | 28716038                       | (T/G)       |
| 4248        | CakSNP4248     | <i>Kabuli</i>    | <i>Ca_Kabuli_Chr03</i>       | 28716047                       | (G/A)       |
| 4249        | CakSNP4249     | <i>Kabuli</i>    | <i>Ca_Kabuli_Chr03</i>       | 28755111                       | (A/G)       |

| <b>S.N.</b> | <b>SNP IDs</b> | <b>Cultivars</b> | <b>Chromosomes/scaffolds</b> | <b>Physical positions (bp)</b> | <b>SNPs</b> |
|-------------|----------------|------------------|------------------------------|--------------------------------|-------------|
| 4250        | CakSNP4250     | <i>Kabuli</i>    | <i>Ca_Kabuli_Chr03</i>       | 28755149                       | (G/A)       |
| 4251        | CakSNP4251     | <i>Kabuli</i>    | <i>Ca_Kabuli_Chr03</i>       | 28845958                       | (A/C)       |
| 4252        | CakSNP4252     | <i>Kabuli</i>    | <i>Ca_Kabuli_Chr03</i>       | 28926094                       | (T/A)       |
| 4253        | CakSNP4253     | <i>Kabuli</i>    | <i>Ca_Kabuli_Chr03</i>       | 28926290                       | (T/C)       |
| 4254        | CakSNP4254     | <i>Kabuli</i>    | <i>Ca_Kabuli_Chr03</i>       | 28934196                       | (C/T)       |
| 4255        | CakSNP4255     | <i>Kabuli</i>    | <i>Ca_Kabuli_Chr03</i>       | 28943956                       | (C/T)       |
| 4256        | CakSNP4256     | <i>Kabuli</i>    | <i>Ca_Kabuli_Chr03</i>       | 28943989                       | (G/T)       |
| 4257        | CakSNP4257     | <i>Kabuli</i>    | <i>Ca_Kabuli_Chr03</i>       | 29056451                       | (T/C)       |
| 4258        | CakSNP4258     | <i>Kabuli</i>    | <i>Ca_Kabuli_Chr03</i>       | 29056528                       | (G/T)       |
| 4259        | CakSNP4259     | <i>Kabuli</i>    | <i>Ca_Kabuli_Chr03</i>       | 29056768                       | (T/C)       |
| 4260        | CakSNP4260     | <i>Kabuli</i>    | <i>Ca_Kabuli_Chr03</i>       | 29107776                       | (A/G)       |
| 4261        | CakSNP4261     | <i>Kabuli</i>    | <i>Ca_Kabuli_Chr03</i>       | 29107947                       | (C/A)       |
| 4262        | CakSNP4262     | <i>Kabuli</i>    | <i>Ca_Kabuli_Chr03</i>       | 29155741                       | (C/G)       |
| 4263        | CakSNP4263     | <i>Kabuli</i>    | <i>Ca_Kabuli_Chr03</i>       | 29177885                       | (A/C)       |
| 4264        | CakSNP4264     | <i>Kabuli</i>    | <i>Ca_Kabuli_Chr03</i>       | 29188300                       | (T/G)       |
| 4265        | CakSNP4265     | <i>Kabuli</i>    | <i>Ca_Kabuli_Chr03</i>       | 29188308                       | (G/A)       |
| 4266        | CakSNP4266     | <i>Kabuli</i>    | <i>Ca_Kabuli_Chr03</i>       | 29207338                       | (G/A)       |
| 4267        | CakSNP4267     | <i>Kabuli</i>    | <i>Ca_Kabuli_Chr03</i>       | 29293770                       | (G/T)       |
| 4268        | CakSNP4268     | <i>Kabuli</i>    | <i>Ca_Kabuli_Chr03</i>       | 29293783                       | (G/A)       |
| 4269        | CakSNP4269     | <i>Kabuli</i>    | <i>Ca_Kabuli_Chr03</i>       | 29293840                       | (C/A)       |
| 4270        | CakSNP4270     | <i>Kabuli</i>    | <i>Ca_Kabuli_Chr03</i>       | 29302251                       | (C/T)       |
| 4271        | CakSNP4271     | <i>Kabuli</i>    | <i>Ca_Kabuli_Chr03</i>       | 29302448                       | (A/C)       |
| 4272        | CakSNP4272     | <i>Kabuli</i>    | <i>Ca_Kabuli_Chr03</i>       | 29303144                       | (A/C)       |
| 4273        | CakSNP4273     | <i>Kabuli</i>    | <i>Ca_Kabuli_Chr03</i>       | 29304116                       | (A/G)       |
| 4274        | CakSNP4274     | <i>Kabuli</i>    | <i>Ca_Kabuli_Chr03</i>       | 29304161                       | (C/T)       |
| 4275        | CakSNP4275     | <i>Kabuli</i>    | <i>Ca_Kabuli_Chr03</i>       | 29311672                       | (C/A)       |
| 4276        | CakSNP4276     | <i>Kabuli</i>    | <i>Ca_Kabuli_Chr03</i>       | 29348267                       | (C/T)       |
| 4277        | CakSNP4277     | <i>Kabuli</i>    | <i>Ca_Kabuli_Chr03</i>       | 29355268                       | (T/A)       |
| 4278        | CakSNP4278     | <i>Kabuli</i>    | <i>Ca_Kabuli_Chr03</i>       | 29376025                       | (A/G)       |
| 4279        | CakSNP4279     | <i>Kabuli</i>    | <i>Ca_Kabuli_Chr03</i>       | 29376008                       | (G/A)       |
| 4280        | CakSNP4280     | <i>Kabuli</i>    | <i>Ca_Kabuli_Chr03</i>       | 29439505                       | (A/G)       |
| 4281        | CakSNP4281     | <i>Kabuli</i>    | <i>Ca_Kabuli_Chr03</i>       | 29485590                       | (T/C)       |
| 4282        | CakSNP4282     | <i>Kabuli</i>    | <i>Ca_Kabuli_Chr03</i>       | 29485566                       | (T/A)       |
| 4283        | CakSNP4283     | <i>Kabuli</i>    | <i>Ca_Kabuli_Chr03</i>       | 29508831                       | (C/T)       |
| 4284        | CakSNP4284     | <i>Kabuli</i>    | <i>Ca_Kabuli_Chr03</i>       | 29509323                       | (G/A)       |
| 4285        | CakSNP4285     | <i>Kabuli</i>    | <i>Ca_Kabuli_Chr03</i>       | 29509310                       | (G/T)       |
| 4286        | CakSNP4286     | <i>Kabuli</i>    | <i>Ca_Kabuli_Chr03</i>       | 29547528                       | (G/A)       |
| 4287        | CakSNP4287     | <i>Kabuli</i>    | <i>Ca_Kabuli_Chr03</i>       | 29588940                       | (C/T)       |
| 4288        | CakSNP4288     | <i>Kabuli</i>    | <i>Ca_Kabuli_Chr03</i>       | 29588934                       | (T/C)       |

| <b>S.N.</b> | <b>SNP IDs</b> | <b>Cultivars</b> | <b>Chromosomes/scaffolds</b> | <b>Physical positions (bp)</b> | <b>SNPs</b> |
|-------------|----------------|------------------|------------------------------|--------------------------------|-------------|
| 4289        | CakSNP4289     | <i>Kabuli</i>    | <i>Ca_Kabuli_Chr03</i>       | 29588930                       | (T/C)       |
| 4290        | CakSNP4290     | <i>Kabuli</i>    | <i>Ca_Kabuli_Chr03</i>       | 29591575                       | (T/G)       |
| 4291        | CakSNP4291     | <i>Kabuli</i>    | <i>Ca_Kabuli_Chr03</i>       | 29591613                       | (G/T)       |
| 4292        | CakSNP4292     | <i>Kabuli</i>    | <i>Ca_Kabuli_Chr03</i>       | 29603720                       | (T/C)       |
| 4293        | CakSNP4293     | <i>Kabuli</i>    | <i>Ca_Kabuli_Chr03</i>       | 29640075                       | (A/C)       |
| 4294        | CakSNP4294     | <i>Kabuli</i>    | <i>Ca_Kabuli_Chr03</i>       | 29640071                       | (T/C)       |
| 4295        | CakSNP4295     | <i>Kabuli</i>    | <i>Ca_Kabuli_Chr03</i>       | 29666633                       | (C/T)       |
| 4296        | CakSNP4296     | <i>Kabuli</i>    | <i>Ca_Kabuli_Chr03</i>       | 29690732                       | (C/A)       |
| 4297        | CakSNP4297     | <i>Kabuli</i>    | <i>Ca_Kabuli_Chr03</i>       | 29698166                       | (G/T)       |
| 4298        | CakSNP4298     | <i>Kabuli</i>    | <i>Ca_Kabuli_Chr03</i>       | 29698245                       | (T/A)       |
| 4299        | CakSNP4299     | <i>Kabuli</i>    | <i>Ca_Kabuli_Chr03</i>       | 29698289                       | (G/A)       |
| 4300        | CakSNP4300     | <i>Kabuli</i>    | <i>Ca_Kabuli_Chr03</i>       | 29698273                       | (A/C)       |
| 4301        | CakSNP4301     | <i>Kabuli</i>    | <i>Ca_Kabuli_Chr03</i>       | 29730019                       | (G/T)       |
| 4302        | CakSNP4302     | <i>Kabuli</i>    | <i>Ca_Kabuli_Chr03</i>       | 29744878                       | (T/G)       |
| 4303        | CakSNP4303     | <i>Kabuli</i>    | <i>Ca_Kabuli_Chr03</i>       | 29744890                       | (A/C)       |
| 4304        | CakSNP4304     | <i>Kabuli</i>    | <i>Ca_Kabuli_Chr03</i>       | 29803866                       | (C/T)       |
| 4305        | CakSNP4305     | <i>Kabuli</i>    | <i>Ca_Kabuli_Chr03</i>       | 29803962                       | (A/G)       |
| 4306        | CakSNP4306     | <i>Kabuli</i>    | <i>Ca_Kabuli_Chr03</i>       | 29807091                       | (C/G)       |
| 4307        | CakSNP4307     | <i>Kabuli</i>    | <i>Ca_Kabuli_Chr03</i>       | 29807248                       | (A/G)       |
| 4308        | CakSNP4308     | <i>Kabuli</i>    | <i>Ca_Kabuli_Chr03</i>       | 29836337                       | (C/A)       |
| 4309        | CakSNP4309     | <i>Kabuli</i>    | <i>Ca_Kabuli_Chr03</i>       | 29840029                       | (C/G)       |
| 4310        | CakSNP4310     | <i>Kabuli</i>    | <i>Ca_Kabuli_Chr03</i>       | 29840028                       | (T/C)       |
| 4311        | CakSNP4311     | <i>Kabuli</i>    | <i>Ca_Kabuli_Chr03</i>       | 29840022                       | (C/A)       |
| 4312        | CakSNP4312     | <i>Kabuli</i>    | <i>Ca_Kabuli_Chr03</i>       | 29840012                       | (A/T)       |
| 4313        | CakSNP4313     | <i>Kabuli</i>    | <i>Ca_Kabuli_Chr03</i>       | 29844509                       | (T/A)       |
| 4314        | CakSNP4314     | <i>Kabuli</i>    | <i>Ca_Kabuli_Chr03</i>       | 29869190                       | (G/T)       |
| 4315        | CakSNP4315     | <i>Kabuli</i>    | <i>Ca_Kabuli_Chr03</i>       | 29869199                       | (T/C)       |
| 4316        | CakSNP4316     | <i>Kabuli</i>    | <i>Ca_Kabuli_Chr03</i>       | 29869428                       | (G/T)       |
| 4317        | CakSNP4317     | <i>Kabuli</i>    | <i>Ca_Kabuli_Chr03</i>       | 29869381                       | (G/A)       |
| 4318        | CakSNP4318     | <i>Kabuli</i>    | <i>Ca_Kabuli_Chr03</i>       | 29869380                       | (G/A)       |
| 4319        | CakSNP4319     | <i>Kabuli</i>    | <i>Ca_Kabuli_Chr03</i>       | 29872643                       | (A/G)       |
| 4320        | CakSNP4320     | <i>Kabuli</i>    | <i>Ca_Kabuli_Chr03</i>       | 29872682                       | (G/A)       |
| 4321        | CakSNP4321     | <i>Kabuli</i>    | <i>Ca_Kabuli_Chr03</i>       | 29898396                       | (A/G)       |
| 4322        | CakSNP4322     | <i>Kabuli</i>    | <i>Ca_Kabuli_Chr03</i>       | 29912488                       | (A/G)       |
| 4323        | CakSNP4323     | <i>Kabuli</i>    | <i>Ca_Kabuli_Chr03</i>       | 29915510                       | (G/A)       |
| 4324        | CakSNP4324     | <i>Kabuli</i>    | <i>Ca_Kabuli_Chr03</i>       | 29932378                       | (C/G)       |
| 4325        | CakSNP4325     | <i>Kabuli</i>    | <i>Ca_Kabuli_Chr03</i>       | 29932504                       | (T/A)       |
| 4326        | CakSNP4326     | <i>Kabuli</i>    | <i>Ca_Kabuli_Chr03</i>       | 29932502                       | (G/C)       |
| 4327        | CakSNP4327     | <i>Kabuli</i>    | <i>Ca_Kabuli_Chr03</i>       | 29954498                       | (G/A)       |



| <b>S.N.</b> | <b>SNP IDs</b> | <b>Cultivars</b> | <b>Chromosomes/scaffolds</b> | <b>Physical positions (bp)</b> | <b>SNPs</b> |
|-------------|----------------|------------------|------------------------------|--------------------------------|-------------|
| 4328        | CakSNP4328     | <i>Kabuli</i>    | <i>Ca_Kabuli_Chr03</i>       | 29954533                       | (A/G)       |
| 4329        | CakSNP4329     | <i>Kabuli</i>    | <i>Ca_Kabuli_Chr03</i>       | 29954648                       | (A/T)       |
| 4330        | CakSNP4330     | <i>Kabuli</i>    | <i>Ca_Kabuli_Chr03</i>       | 29954612                       | (T/G)       |
| 4331        | CakSNP4331     | <i>Kabuli</i>    | <i>Ca_Kabuli_Chr03</i>       | 29974532                       | (A/G)       |
| 4332        | CakSNP4332     | <i>Kabuli</i>    | <i>Ca_Kabuli_Chr03</i>       | 29974535                       | (A/G)       |
| 4333        | CakSNP4333     | <i>Kabuli</i>    | <i>Ca_Kabuli_Chr03</i>       | 29974595                       | (C/T)       |
| 4334        | CakSNP4334     | <i>Kabuli</i>    | <i>Ca_Kabuli_Chr03</i>       | 29982638                       | (A/G)       |
| 4335        | CakSNP4335     | <i>Kabuli</i>    | <i>Ca_Kabuli_Chr03</i>       | 29982644                       | (T/C)       |
| 4336        | CakSNP4336     | <i>Kabuli</i>    | <i>Ca_Kabuli_Chr03</i>       | 29982718                       | (C/A)       |
| 4337        | CakSNP4337     | <i>Kabuli</i>    | <i>Ca_Kabuli_Chr03</i>       | 30004352                       | (T/A)       |
| 4338        | CakSNP4338     | <i>Kabuli</i>    | <i>Ca_Kabuli_Chr03</i>       | 30004311                       | (T/G)       |
| 4339        | CakSNP4339     | <i>Kabuli</i>    | <i>Ca_Kabuli_Chr03</i>       | 30004295                       | (A/G)       |
| 4340        | CakSNP4340     | <i>Kabuli</i>    | <i>Ca_Kabuli_Chr03</i>       | 30004279                       | (G/T)       |
| 4341        | CakSNP4341     | <i>Kabuli</i>    | <i>Ca_Kabuli_Chr03</i>       | 30009698                       | (C/T)       |
| 4342        | CakSNP4342     | <i>Kabuli</i>    | <i>Ca_Kabuli_Chr03</i>       | 30009751                       | (A/C)       |
| 4343        | CakSNP4343     | <i>Kabuli</i>    | <i>Ca_Kabuli_Chr03</i>       | 30011584                       | (T/C)       |
| 4344        | CakSNP4344     | <i>Kabuli</i>    | <i>Ca_Kabuli_Chr03</i>       | 30011669                       | (A/G)       |
| 4345        | CakSNP4345     | <i>Kabuli</i>    | <i>Ca_Kabuli_Chr03</i>       | 30011642                       | (T/A)       |
| 4346        | CakSNP4346     | <i>Kabuli</i>    | <i>Ca_Kabuli_Chr03</i>       | 30011621                       | (C/T)       |
| 4347        | CakSNP4347     | <i>Kabuli</i>    | <i>Ca_Kabuli_Chr03</i>       | 30029874                       | (C/T)       |
| 4348        | CakSNP4348     | <i>Kabuli</i>    | <i>Ca_Kabuli_Chr03</i>       | 30029858                       | (T/A)       |
| 4349        | CakSNP4349     | <i>Kabuli</i>    | <i>Ca_Kabuli_Chr03</i>       | 30029842                       | (G/C)       |
| 4350        | CakSNP4350     | <i>Kabuli</i>    | <i>Ca_Kabuli_Chr03</i>       | 30029826                       | (T/C)       |
| 4351        | CakSNP4351     | <i>Kabuli</i>    | <i>Ca_Kabuli_Chr03</i>       | 30029817                       | (T/G)       |
| 4352        | CakSNP4352     | <i>Kabuli</i>    | <i>Ca_Kabuli_Chr03</i>       | 30084154                       | (T/C)       |
| 4353        | CakSNP4353     | <i>Kabuli</i>    | <i>Ca_Kabuli_Chr03</i>       | 30101412                       | (T/C)       |
| 4354        | CakSNP4354     | <i>Kabuli</i>    | <i>Ca_Kabuli_Chr03</i>       | 30101476                       | (A/C)       |
| 4355        | CakSNP4355     | <i>Kabuli</i>    | <i>Ca_Kabuli_Chr03</i>       | 30111154                       | (A/C)       |
| 4356        | CakSNP4356     | <i>Kabuli</i>    | <i>Ca_Kabuli_Chr03</i>       | 30111146                       | (G/C)       |
| 4357        | CakSNP4357     | <i>Kabuli</i>    | <i>Ca_Kabuli_Chr03</i>       | 30148907                       | (T/C)       |
| 4358        | CakSNP4358     | <i>Kabuli</i>    | <i>Ca_Kabuli_Chr03</i>       | 30194810                       | (C/T)       |
| 4359        | CakSNP4359     | <i>Kabuli</i>    | <i>Ca_Kabuli_Chr03</i>       | 30206121                       | (T/A)       |
| 4360        | CakSNP4360     | <i>Kabuli</i>    | <i>Ca_Kabuli_Chr03</i>       | 30206266                       | (G/A)       |
| 4361        | CakSNP4361     | <i>Kabuli</i>    | <i>Ca_Kabuli_Chr03</i>       | 30206281                       | (A/T)       |
| 4362        | CakSNP4362     | <i>Kabuli</i>    | <i>Ca_Kabuli_Chr03</i>       | 30206436                       | (G/A)       |
| 4363        | CakSNP4363     | <i>Kabuli</i>    | <i>Ca_Kabuli_Chr03</i>       | 30267761                       | (T/G)       |
| 4364        | CakSNP4364     | <i>Kabuli</i>    | <i>Ca_Kabuli_Chr03</i>       | 30271022                       | (G/T)       |
| 4365        | CakSNP4365     | <i>Kabuli</i>    | <i>Ca_Kabuli_Chr03</i>       | 30271028                       | (G/A)       |
| 4366        | CakSNP4366     | <i>Kabuli</i>    | <i>Ca_Kabuli_Chr03</i>       | 30271034                       | (G/A)       |

| <b>S.N.</b> | <b>SNP IDs</b> | <b>Cultivars</b> | <b>Chromosomes/scaffolds</b> | <b>Physical positions (bp)</b> | <b>SNPs</b> |
|-------------|----------------|------------------|------------------------------|--------------------------------|-------------|
| 4367        | CakSNP4367     | <i>Kabuli</i>    | <i>Ca_Kabuli_Chr03</i>       | 30309625                       | (G/C)       |
| 4368        | CakSNP4368     | <i>Kabuli</i>    | <i>Ca_Kabuli_Chr03</i>       | 30309624                       | (A/T)       |
| 4369        | CakSNP4369     | <i>Kabuli</i>    | <i>Ca_Kabuli_Chr03</i>       | 30321177                       | (C/G)       |
| 4370        | CakSNP4370     | <i>Kabuli</i>    | <i>Ca_Kabuli_Chr03</i>       | 30321245                       | (C/T)       |
| 4371        | CakSNP4371     | <i>Kabuli</i>    | <i>Ca_Kabuli_Chr03</i>       | 30321272                       | (C/A)       |
| 4372        | CakSNP4372     | <i>Kabuli</i>    | <i>Ca_Kabuli_Chr03</i>       | 30323585                       | (G/A)       |
| 4373        | CakSNP4373     | <i>Kabuli</i>    | <i>Ca_Kabuli_Chr03</i>       | 30376319                       | (G/A)       |
| 4374        | CakSNP4374     | <i>Kabuli</i>    | <i>Ca_Kabuli_Chr03</i>       | 30385144                       | (G/A)       |
| 4375        | CakSNP4375     | <i>Kabuli</i>    | <i>Ca_Kabuli_Chr03</i>       | 30385153                       | (T/A)       |
| 4376        | CakSNP4376     | <i>Kabuli</i>    | <i>Ca_Kabuli_Chr03</i>       | 30390663                       | (C/T)       |
| 4377        | CakSNP4377     | <i>Kabuli</i>    | <i>Ca_Kabuli_Chr03</i>       | 30397262                       | (A/T)       |
| 4378        | CakSNP4378     | <i>Kabuli</i>    | <i>Ca_Kabuli_Chr03</i>       | 30425496                       | (G/T)       |
| 4379        | CakSNP4379     | <i>Kabuli</i>    | <i>Ca_Kabuli_Chr03</i>       | 30510392                       | (T/A)       |
| 4380        | CakSNP4380     | <i>Kabuli</i>    | <i>Ca_Kabuli_Chr03</i>       | 30510333                       | (C/T)       |
| 4381        | CakSNP4381     | <i>Kabuli</i>    | <i>Ca_Kabuli_Chr03</i>       | 30522442                       | (A/C)       |
| 4382        | CakSNP4382     | <i>Kabuli</i>    | <i>Ca_Kabuli_Chr03</i>       | 30522485                       | (C/T)       |
| 4383        | CakSNP4383     | <i>Kabuli</i>    | <i>Ca_Kabuli_Chr03</i>       | 30522498                       | (T/C)       |
| 4384        | CakSNP4384     | <i>Kabuli</i>    | <i>Ca_Kabuli_Chr03</i>       | 30650598                       | (C/A)       |
| 4385        | CakSNP4385     | <i>Kabuli</i>    | <i>Ca_Kabuli_Chr03</i>       | 30650634                       | (T/C)       |
| 4386        | CakSNP4386     | <i>Kabuli</i>    | <i>Ca_Kabuli_Chr03</i>       | 30650659                       | (C/T)       |
| 4387        | CakSNP4387     | <i>Kabuli</i>    | <i>Ca_Kabuli_Chr03</i>       | 30659438                       | (T/A)       |
| 4388        | CakSNP4388     | <i>Kabuli</i>    | <i>Ca_Kabuli_Chr03</i>       | 30675468                       | (T/G)       |
| 4389        | CakSNP4389     | <i>Kabuli</i>    | <i>Ca_Kabuli_Chr03</i>       | 30681031                       | (A/G)       |
| 4390        | CakSNP4390     | <i>Kabuli</i>    | <i>Ca_Kabuli_Chr03</i>       | 30681032                       | (A/G)       |
| 4391        | CakSNP4391     | <i>Kabuli</i>    | <i>Ca_Kabuli_Chr03</i>       | 30688336                       | (T/G)       |
| 4392        | CakSNP4392     | <i>Kabuli</i>    | <i>Ca_Kabuli_Chr03</i>       | 30688354                       | (G/A)       |
| 4393        | CakSNP4393     | <i>Kabuli</i>    | <i>Ca_Kabuli_Chr03</i>       | 30688369                       | (T/C)       |
| 4394        | CakSNP4394     | <i>Kabuli</i>    | <i>Ca_Kabuli_Chr03</i>       | 30688418                       | (A/C)       |
| 4395        | CakSNP4395     | <i>Kabuli</i>    | <i>Ca_Kabuli_Chr03</i>       | 30688511                       | (G/C)       |
| 4396        | CakSNP4396     | <i>Kabuli</i>    | <i>Ca_Kabuli_Chr03</i>       | 30688485                       | (C/A)       |
| 4397        | CakSNP4397     | <i>Kabuli</i>    | <i>Ca_Kabuli_Chr03</i>       | 30688484                       | (A/C)       |
| 4398        | CakSNP4398     | <i>Kabuli</i>    | <i>Ca_Kabuli_Chr03</i>       | 30688454                       | (A/G)       |
| 4399        | CakSNP4399     | <i>Kabuli</i>    | <i>Ca_Kabuli_Chr03</i>       | 30688451                       | (T/C)       |
| 4400        | CakSNP4400     | <i>Kabuli</i>    | <i>Ca_Kabuli_Chr03</i>       | 30718334                       | (G/T)       |
| 4401        | CakSNP4401     | <i>Kabuli</i>    | <i>Ca_Kabuli_Chr03</i>       | 30751893                       | (A/C)       |
| 4402        | CakSNP4402     | <i>Kabuli</i>    | <i>Ca_Kabuli_Chr03</i>       | 30751949                       | (A/T)       |
| 4403        | CakSNP4403     | <i>Kabuli</i>    | <i>Ca_Kabuli_Chr03</i>       | 30791169                       | (A/T)       |
| 4404        | CakSNP4404     | <i>Kabuli</i>    | <i>Ca_Kabuli_Chr03</i>       | 30791229                       | (G/A)       |
| 4405        | CakSNP4405     | <i>Kabuli</i>    | <i>Ca_Kabuli_Chr03</i>       | 30791693                       | (C/T)       |

| <b>S.N.</b> | <b>SNP IDs</b> | <b>Cultivars</b> | <b>Chromosomes/scaffolds</b> | <b>Physical positions (bp)</b> | <b>SNPs</b> |
|-------------|----------------|------------------|------------------------------|--------------------------------|-------------|
| 4406        | CakSNP4406     | <i>Kabuli</i>    | <i>Ca_Kabuli_Chr03</i>       | 30794040                       | (C/A)       |
| 4407        | CakSNP4407     | <i>Kabuli</i>    | <i>Ca_Kabuli_Chr03</i>       | 30794046                       | (A/C)       |
| 4408        | CakSNP4408     | <i>Kabuli</i>    | <i>Ca_Kabuli_Chr03</i>       | 30837147                       | (A/G)       |
| 4409        | CakSNP4409     | <i>Kabuli</i>    | <i>Ca_Kabuli_Chr03</i>       | 30837284                       | (C/T)       |
| 4410        | CakSNP4410     | <i>Kabuli</i>    | <i>Ca_Kabuli_Chr03</i>       | 30837265                       | (T/C)       |
| 4411        | CakSNP4411     | <i>Kabuli</i>    | <i>Ca_Kabuli_Chr03</i>       | 30880452                       | (T/C)       |
| 4412        | CakSNP4412     | <i>Kabuli</i>    | <i>Ca_Kabuli_Chr03</i>       | 30880610                       | (A/G)       |
| 4413        | CakSNP4413     | <i>Kabuli</i>    | <i>Ca_Kabuli_Chr03</i>       | 31020357                       | (C/A)       |
| 4414        | CakSNP4414     | <i>Kabuli</i>    | <i>Ca_Kabuli_Chr03</i>       | 31020358                       | (C/G)       |
| 4415        | CakSNP4415     | <i>Kabuli</i>    | <i>Ca_Kabuli_Chr03</i>       | 31073396                       | (T/C)       |
| 4416        | CakSNP4416     | <i>Kabuli</i>    | <i>Ca_Kabuli_Chr03</i>       | 31073425                       | (G/C)       |
| 4417        | CakSNP4417     | <i>Kabuli</i>    | <i>Ca_Kabuli_Chr03</i>       | 31073451                       | (A/G)       |
| 4418        | CakSNP4418     | <i>Kabuli</i>    | <i>Ca_Kabuli_Chr03</i>       | 31091875                       | (T/G)       |
| 4419        | CakSNP4419     | <i>Kabuli</i>    | <i>Ca_Kabuli_Chr03</i>       | 31267639                       | (T/A)       |
| 4420        | CakSNP4420     | <i>Kabuli</i>    | <i>Ca_Kabuli_Chr03</i>       | 31267675                       | (A/G)       |
| 4421        | CakSNP4421     | <i>Kabuli</i>    | <i>Ca_Kabuli_Chr03</i>       | 31267681                       | (G/A)       |
| 4422        | CakSNP4422     | <i>Kabuli</i>    | <i>Ca_Kabuli_Chr03</i>       | 31267828                       | (A/G)       |
| 4423        | CakSNP4423     | <i>Kabuli</i>    | <i>Ca_Kabuli_Chr03</i>       | 31267927                       | (T/G)       |
| 4424        | CakSNP4424     | <i>Kabuli</i>    | <i>Ca_Kabuli_Chr03</i>       | 31268143                       | (A/G)       |
| 4425        | CakSNP4425     | <i>Kabuli</i>    | <i>Ca_Kabuli_Chr03</i>       | 31279502                       | (C/T)       |
| 4426        | CakSNP4426     | <i>Kabuli</i>    | <i>Ca_Kabuli_Chr03</i>       | 31279541                       | (A/G)       |
| 4427        | CakSNP4427     | <i>Kabuli</i>    | <i>Ca_Kabuli_Chr03</i>       | 31279639                       | (C/T)       |
| 4428        | CakSNP4428     | <i>Kabuli</i>    | <i>Ca_Kabuli_Chr03</i>       | 31279629                       | (C/G)       |
| 4429        | CakSNP4429     | <i>Kabuli</i>    | <i>Ca_Kabuli_Chr03</i>       | 31279628                       | (T/C)       |
| 4430        | CakSNP4430     | <i>Kabuli</i>    | <i>Ca_Kabuli_Chr03</i>       | 31279616                       | (T/A)       |
| 4431        | CakSNP4431     | <i>Kabuli</i>    | <i>Ca_Kabuli_Chr03</i>       | 31279606                       | (G/A)       |
| 4432        | CakSNP4432     | <i>Kabuli</i>    | <i>Ca_Kabuli_Chr03</i>       | 31279605                       | (G/A)       |
| 4433        | CakSNP4433     | <i>Kabuli</i>    | <i>Ca_Kabuli_Chr03</i>       | 31279604                       | (C/G)       |
| 4434        | CakSNP4434     | <i>Kabuli</i>    | <i>Ca_Kabuli_Chr03</i>       | 31279600                       | (T/C)       |
| 4435        | CakSNP4435     | <i>Kabuli</i>    | <i>Ca_Kabuli_Chr03</i>       | 31279586                       | (A/G)       |
| 4436        | CakSNP4436     | <i>Kabuli</i>    | <i>Ca_Kabuli_Chr03</i>       | 31287618                       | (C/A)       |
| 4437        | CakSNP4437     | <i>Kabuli</i>    | <i>Ca_Kabuli_Chr03</i>       | 31287909                       | (A/G)       |
| 4438        | CakSNP4438     | <i>Kabuli</i>    | <i>Ca_Kabuli_Chr03</i>       | 31288143                       | (T/C)       |
| 4439        | CakSNP4439     | <i>Kabuli</i>    | <i>Ca_Kabuli_Chr03</i>       | 31301723                       | (G/A)       |
| 4440        | CakSNP4440     | <i>Kabuli</i>    | <i>Ca_Kabuli_Chr03</i>       | 31301783                       | (A/G)       |
| 4441        | CakSNP4441     | <i>Kabuli</i>    | <i>Ca_Kabuli_Chr03</i>       | 31302060                       | (T/C)       |
| 4442        | CakSNP4442     | <i>Kabuli</i>    | <i>Ca_Kabuli_Chr03</i>       | 31302117                       | (C/T)       |
| 4443        | CakSNP4443     | <i>Kabuli</i>    | <i>Ca_Kabuli_Chr03</i>       | 31313021                       | (G/T)       |
| 4444        | CakSNP4444     | <i>Kabuli</i>    | <i>Ca_Kabuli_Chr03</i>       | 31317521                       | (T/G)       |

| <b>S.N.</b> | <b>SNP IDs</b> | <b>Cultivars</b> | <b>Chromosomes/scaffolds</b> | <b>Physical positions (bp)</b> | <b>SNPs</b> |
|-------------|----------------|------------------|------------------------------|--------------------------------|-------------|
| 4445        | CakSNP4445     | <i>Kabuli</i>    | <i>Ca_Kabuli_Chr03</i>       | 31321725                       | (A/G)       |
| 4446        | CakSNP4446     | <i>Kabuli</i>    | <i>Ca_Kabuli_Chr03</i>       | 31321778                       | (G/A)       |
| 4447        | CakSNP4447     | <i>Kabuli</i>    | <i>Ca_Kabuli_Chr03</i>       | 31321850                       | (A/G)       |
| 4448        | CakSNP4448     | <i>Kabuli</i>    | <i>Ca_Kabuli_Chr03</i>       | 31341335                       | (C/T)       |
| 4449        | CakSNP4449     | <i>Kabuli</i>    | <i>Ca_Kabuli_Chr03</i>       | 31341323                       | (T/C)       |
| 4450        | CakSNP4450     | <i>Kabuli</i>    | <i>Ca_Kabuli_Chr03</i>       | 31342119                       | (A/T)       |
| 4451        | CakSNP4451     | <i>Kabuli</i>    | <i>Ca_Kabuli_Chr03</i>       | 31354988                       | (G/C)       |
| 4452        | CakSNP4452     | <i>Kabuli</i>    | <i>Ca_Kabuli_Chr03</i>       | 31355001                       | (C/T)       |
| 4453        | CakSNP4453     | <i>Kabuli</i>    | <i>Ca_Kabuli_Chr03</i>       | 31355026                       | (T/C)       |
| 4454        | CakSNP4454     | <i>Kabuli</i>    | <i>Ca_Kabuli_Chr03</i>       | 31355066                       | (A/T)       |
| 4455        | CakSNP4455     | <i>Kabuli</i>    | <i>Ca_Kabuli_Chr03</i>       | 31357787                       | (A/T)       |
| 4456        | CakSNP4456     | <i>Kabuli</i>    | <i>Ca_Kabuli_Chr03</i>       | 31431216                       | (C/T)       |
| 4457        | CakSNP4457     | <i>Kabuli</i>    | <i>Ca_Kabuli_Chr03</i>       | 31478804                       | (T/C)       |
| 4458        | CakSNP4458     | <i>Kabuli</i>    | <i>Ca_Kabuli_Chr03</i>       | 31478882                       | (C/T)       |
| 4459        | CakSNP4459     | <i>Kabuli</i>    | <i>Ca_Kabuli_Chr03</i>       | 31480603                       | (T/C)       |
| 4460        | CakSNP4460     | <i>Kabuli</i>    | <i>Ca_Kabuli_Chr03</i>       | 31516662                       | (G/T)       |
| 4461        | CakSNP4461     | <i>Kabuli</i>    | <i>Ca_Kabuli_Chr03</i>       | 31516766                       | (T/C)       |
| 4462        | CakSNP4462     | <i>Kabuli</i>    | <i>Ca_Kabuli_Chr03</i>       | 31520119                       | (C/T)       |
| 4463        | CakSNP4463     | <i>Kabuli</i>    | <i>Ca_Kabuli_Chr03</i>       | 31520225                       | (A/T)       |
| 4464        | CakSNP4464     | <i>Kabuli</i>    | <i>Ca_Kabuli_Chr03</i>       | 31520198                       | (G/A)       |
| 4465        | CakSNP4465     | <i>Kabuli</i>    | <i>Ca_Kabuli_Chr03</i>       | 31520190                       | (T/C)       |
| 4466        | CakSNP4466     | <i>Kabuli</i>    | <i>Ca_Kabuli_Chr03</i>       | 31520832                       | (G/A)       |
| 4467        | CakSNP4467     | <i>Kabuli</i>    | <i>Ca_Kabuli_Chr03</i>       | 31521142                       | (T/C)       |
| 4468        | CakSNP4468     | <i>Kabuli</i>    | <i>Ca_Kabuli_Chr03</i>       | 31521155                       | (T/A)       |
| 4469        | CakSNP4469     | <i>Kabuli</i>    | <i>Ca_Kabuli_Chr03</i>       | 31589355                       | (A/G)       |
| 4470        | CakSNP4470     | <i>Kabuli</i>    | <i>Ca_Kabuli_Chr03</i>       | 31589329                       | (C/T)       |
| 4471        | CakSNP4471     | <i>Kabuli</i>    | <i>Ca_Kabuli_Chr03</i>       | 31591065                       | (G/A)       |
| 4472        | CakSNP4472     | <i>Kabuli</i>    | <i>Ca_Kabuli_Chr03</i>       | 31606359                       | (C/T)       |
| 4473        | CakSNP4473     | <i>Kabuli</i>    | <i>Ca_Kabuli_Chr03</i>       | 31630175                       | (T/A)       |
| 4474        | CakSNP4474     | <i>Kabuli</i>    | <i>Ca_Kabuli_Chr03</i>       | 31630178                       | (G/T)       |
| 4475        | CakSNP4475     | <i>Kabuli</i>    | <i>Ca_Kabuli_Chr03</i>       | 31630195                       | (T/C)       |
| 4476        | CakSNP4476     | <i>Kabuli</i>    | <i>Ca_Kabuli_Chr03</i>       | 31631451                       | (A/C)       |
| 4477        | CakSNP4477     | <i>Kabuli</i>    | <i>Ca_Kabuli_Chr03</i>       | 31631444                       | (T/G)       |
| 4478        | CakSNP4478     | <i>Kabuli</i>    | <i>Ca_Kabuli_Chr03</i>       | 31631561                       | (G/A)       |
| 4479        | CakSNP4479     | <i>Kabuli</i>    | <i>Ca_Kabuli_Chr03</i>       | 31631534                       | (A/G)       |
| 4480        | CakSNP4480     | <i>Kabuli</i>    | <i>Ca_Kabuli_Chr03</i>       | 31631622                       | (G/A)       |
| 4481        | CakSNP4481     | <i>Kabuli</i>    | <i>Ca_Kabuli_Chr03</i>       | 31631644                       | (A/C)       |
| 4482        | CakSNP4482     | <i>Kabuli</i>    | <i>Ca_Kabuli_Chr03</i>       | 31646735                       | (C/T)       |
| 4483        | CakSNP4483     | <i>Kabuli</i>    | <i>Ca_Kabuli_Chr03</i>       | 31646817                       | (C/T)       |

| <b>S.N.</b> | <b>SNP IDs</b> | <b>Cultivars</b> | <b>Chromosomes/scaffolds</b> | <b>Physical positions (bp)</b> | <b>SNPs</b> |
|-------------|----------------|------------------|------------------------------|--------------------------------|-------------|
| 4484        | CakSNP4484     | <i>Kabuli</i>    | <i>Ca_Kabuli_Chr03</i>       | 31646802                       | (G/A)       |
| 4485        | CakSNP4485     | <i>Kabuli</i>    | <i>Ca_Kabuli_Chr03</i>       | 31683906                       | (A/G)       |
| 4486        | CakSNP4486     | <i>Kabuli</i>    | <i>Ca_Kabuli_Chr03</i>       | 31689128                       | (C/T)       |
| 4487        | CakSNP4487     | <i>Kabuli</i>    | <i>Ca_Kabuli_Chr03</i>       | 31698493                       | (A/C)       |
| 4488        | CakSNP4488     | <i>Kabuli</i>    | <i>Ca_Kabuli_Chr03</i>       | 31766363                       | (G/A)       |
| 4489        | CakSNP4489     | <i>Kabuli</i>    | <i>Ca_Kabuli_Chr03</i>       | 31770365                       | (A/C)       |
| 4490        | CakSNP4490     | <i>Kabuli</i>    | <i>Ca_Kabuli_Chr03</i>       | 31771314                       | (C/A)       |
| 4491        | CakSNP4491     | <i>Kabuli</i>    | <i>Ca_Kabuli_Chr03</i>       | 31790189                       | (C/T)       |
| 4492        | CakSNP4492     | <i>Kabuli</i>    | <i>Ca_Kabuli_Chr03</i>       | 31790216                       | (G/A)       |
| 4493        | CakSNP4493     | <i>Kabuli</i>    | <i>Ca_Kabuli_Chr03</i>       | 31790239                       | (G/T)       |
| 4494        | CakSNP4494     | <i>Kabuli</i>    | <i>Ca_Kabuli_Chr03</i>       | 31790352                       | (G/A)       |
| 4495        | CakSNP4495     | <i>Kabuli</i>    | <i>Ca_Kabuli_Chr03</i>       | 31814300                       | (A/G)       |
| 4496        | CakSNP4496     | <i>Kabuli</i>    | <i>Ca_Kabuli_Chr03</i>       | 31852191                       | (T/C)       |
| 4497        | CakSNP4497     | <i>Kabuli</i>    | <i>Ca_Kabuli_Chr03</i>       | 31857877                       | (C/T)       |
| 4498        | CakSNP4498     | <i>Kabuli</i>    | <i>Ca_Kabuli_Chr03</i>       | 31859152                       | (C/G)       |
| 4499        | CakSNP4499     | <i>Kabuli</i>    | <i>Ca_Kabuli_Chr03</i>       | 31859251                       | (T/C)       |
| 4500        | CakSNP4500     | <i>Kabuli</i>    | <i>Ca_Kabuli_Chr03</i>       | 31926694                       | (C/G)       |
| 4501        | CakSNP4501     | <i>Kabuli</i>    | <i>Ca_Kabuli_Chr03</i>       | 31931014                       | (A/C)       |
| 4502        | CakSNP4502     | <i>Kabuli</i>    | <i>Ca_Kabuli_Chr03</i>       | 31945504                       | (C/T)       |
| 4503        | CakSNP4503     | <i>Kabuli</i>    | <i>Ca_Kabuli_Chr03</i>       | 31945634                       | (A/G)       |
| 4504        | CakSNP4504     | <i>Kabuli</i>    | <i>Ca_Kabuli_Chr03</i>       | 31951994                       | (G/A)       |
| 4505        | CakSNP4505     | <i>Kabuli</i>    | <i>Ca_Kabuli_Chr03</i>       | 31953466                       | (G/A)       |
| 4506        | CakSNP4506     | <i>Kabuli</i>    | <i>Ca_Kabuli_Chr03</i>       | 31953549                       | (C/T)       |
| 4507        | CakSNP4507     | <i>Kabuli</i>    | <i>Ca_Kabuli_Chr03</i>       | 32351052                       | (C/T)       |
| 4508        | CakSNP4508     | <i>Kabuli</i>    | <i>Ca_Kabuli_Chr03</i>       | 32351031                       | (G/C)       |
| 4509        | CakSNP4509     | <i>Kabuli</i>    | <i>Ca_Kabuli_Chr03</i>       | 32357599                       | (C/T)       |
| 4510        | CakSNP4510     | <i>Kabuli</i>    | <i>Ca_Kabuli_Chr03</i>       | 32357578                       | (G/C)       |
| 4511        | CakSNP4511     | <i>Kabuli</i>    | <i>Ca_Kabuli_Chr03</i>       | 32448959                       | (T/C)       |
| 4512        | CakSNP4512     | <i>Kabuli</i>    | <i>Ca_Kabuli_Chr03</i>       | 32449654                       | (T/G)       |
| 4513        | CakSNP4513     | <i>Kabuli</i>    | <i>Ca_Kabuli_Chr03</i>       | 32449700                       | (C/T)       |
| 4514        | CakSNP4514     | <i>Kabuli</i>    | <i>Ca_Kabuli_Chr03</i>       | 32510033                       | (T/G)       |
| 4515        | CakSNP4515     | <i>Kabuli</i>    | <i>Ca_Kabuli_Chr03</i>       | 32510090                       | (A/G)       |
| 4516        | CakSNP4516     | <i>Kabuli</i>    | <i>Ca_Kabuli_Chr03</i>       | 32510130                       | (A/G)       |
| 4517        | CakSNP4517     | <i>Kabuli</i>    | <i>Ca_Kabuli_Chr03</i>       | 32510124                       | (C/T)       |
| 4518        | CakSNP4518     | <i>Kabuli</i>    | <i>Ca_Kabuli_Chr03</i>       | 32510111                       | (C/T)       |
| 4519        | CakSNP4519     | <i>Kabuli</i>    | <i>Ca_Kabuli_Chr03</i>       | 32510071                       | (G/T)       |
| 4520        | CakSNP4520     | <i>Kabuli</i>    | <i>Ca_Kabuli_Chr03</i>       | 32510081                       | (C/T)       |
| 4521        | CakSNP4521     | <i>Kabuli</i>    | <i>Ca_Kabuli_Chr03</i>       | 32514908                       | (A/G)       |
| 4522        | CakSNP4522     | <i>Kabuli</i>    | <i>Ca_Kabuli_Chr03</i>       | 32514890                       | (A/G)       |

| <b>S.N.</b> | <b>SNP IDs</b> | <b>Cultivars</b> | <b>Chromosomes/scaffolds</b> | <b>Physical positions (bp)</b> | <b>SNPs</b> |
|-------------|----------------|------------------|------------------------------|--------------------------------|-------------|
| 4523        | CakSNP4523     | <i>Kabuli</i>    | <i>Ca_Kabuli_Chr03</i>       | 32514889                       | (C/T)       |
| 4524        | CakSNP4524     | <i>Kabuli</i>    | <i>Ca_Kabuli_Chr03</i>       | 32514869                       | (C/T)       |
| 4525        | CakSNP4525     | <i>Kabuli</i>    | <i>Ca_Kabuli_Chr03</i>       | 32514868                       | (A/G)       |
| 4526        | CakSNP4526     | <i>Kabuli</i>    | <i>Ca_Kabuli_Chr03</i>       | 32514867                       | (C/T)       |
| 4527        | CakSNP4527     | <i>Kabuli</i>    | <i>Ca_Kabuli_Chr03</i>       | 32514863                       | (G/C)       |
| 4528        | CakSNP4528     | <i>Kabuli</i>    | <i>Ca_Kabuli_Chr03</i>       | 32514859                       | (C/T)       |
| 4529        | CakSNP4529     | <i>Kabuli</i>    | <i>Ca_Kabuli_Chr03</i>       | 32514916                       | (G/C)       |
| 4530        | CakSNP4530     | <i>Kabuli</i>    | <i>Ca_Kabuli_Chr03</i>       | 32525128                       | (G/T)       |
| 4531        | CakSNP4531     | <i>Kabuli</i>    | <i>Ca_Kabuli_Chr03</i>       | 32557850                       | (C/T)       |
| 4532        | CakSNP4532     | <i>Kabuli</i>    | <i>Ca_Kabuli_Chr03</i>       | 32571237                       | (G/A)       |
| 4533        | CakSNP4533     | <i>Kabuli</i>    | <i>Ca_Kabuli_Chr03</i>       | 32571291                       | (A/G)       |
| 4534        | CakSNP4534     | <i>Kabuli</i>    | <i>Ca_Kabuli_Chr03</i>       | 32571275                       | (T/C)       |
| 4535        | CakSNP4535     | <i>Kabuli</i>    | <i>Ca_Kabuli_Chr03</i>       | 32600003                       | (A/G)       |
| 4536        | CakSNP4536     | <i>Kabuli</i>    | <i>Ca_Kabuli_Chr03</i>       | 32601732                       | (T/C)       |
| 4537        | CakSNP4537     | <i>Kabuli</i>    | <i>Ca_Kabuli_Chr03</i>       | 32608947                       | (A/G)       |
| 4538        | CakSNP4538     | <i>Kabuli</i>    | <i>Ca_Kabuli_Chr03</i>       | 32662861                       | (A/G)       |
| 4539        | CakSNP4539     | <i>Kabuli</i>    | <i>Ca_Kabuli_Chr03</i>       | 32662858                       | (A/G)       |
| 4540        | CakSNP4540     | <i>Kabuli</i>    | <i>Ca_Kabuli_Chr03</i>       | 32663015                       | (C/T)       |
| 4541        | CakSNP4541     | <i>Kabuli</i>    | <i>Ca_Kabuli_Chr03</i>       | 32663059                       | (A/C)       |
| 4542        | CakSNP4542     | <i>Kabuli</i>    | <i>Ca_Kabuli_Chr03</i>       | 32694509                       | (T/C)       |
| 4543        | CakSNP4543     | <i>Kabuli</i>    | <i>Ca_Kabuli_Chr03</i>       | 32694454                       | (T/C)       |
| 4544        | CakSNP4544     | <i>Kabuli</i>    | <i>Ca_Kabuli_Chr03</i>       | 32704734                       | (G/A)       |
| 4545        | CakSNP4545     | <i>Kabuli</i>    | <i>Ca_Kabuli_Chr03</i>       | 32704868                       | (G/T)       |
| 4546        | CakSNP4546     | <i>Kabuli</i>    | <i>Ca_Kabuli_Chr03</i>       | 32704953                       | (G/A)       |
| 4547        | CakSNP4547     | <i>Kabuli</i>    | <i>Ca_Kabuli_Chr03</i>       | 32706200                       | (C/T)       |
| 4548        | CakSNP4548     | <i>Kabuli</i>    | <i>Ca_Kabuli_Chr03</i>       | 32725039                       | (C/G)       |
| 4549        | CakSNP4549     | <i>Kabuli</i>    | <i>Ca_Kabuli_Chr03</i>       | 32725096                       | (A/T)       |
| 4550        | CakSNP4550     | <i>Kabuli</i>    | <i>Ca_Kabuli_Chr03</i>       | 32758259                       | (C/A)       |
| 4551        | CakSNP4551     | <i>Kabuli</i>    | <i>Ca_Kabuli_Chr03</i>       | 32758293                       | (T/C)       |
| 4552        | CakSNP4552     | <i>Kabuli</i>    | <i>Ca_Kabuli_Chr03</i>       | 32785228                       | (A/G)       |
| 4553        | CakSNP4553     | <i>Kabuli</i>    | <i>Ca_Kabuli_Chr03</i>       | 32827067                       | (C/G)       |
| 4554        | CakSNP4554     | <i>Kabuli</i>    | <i>Ca_Kabuli_Chr03</i>       | 32827065                       | (T/G)       |
| 4555        | CakSNP4555     | <i>Kabuli</i>    | <i>Ca_Kabuli_Chr03</i>       | 32845361                       | (A/G)       |
| 4556        | CakSNP4556     | <i>Kabuli</i>    | <i>Ca_Kabuli_Chr03</i>       | 32845395                       | (C/A)       |
| 4557        | CakSNP4557     | <i>Kabuli</i>    | <i>Ca_Kabuli_Chr03</i>       | 32847120                       | (T/A)       |
| 4558        | CakSNP4558     | <i>Kabuli</i>    | <i>Ca_Kabuli_Chr03</i>       | 32847216                       | (A/G)       |
| 4559        | CakSNP4559     | <i>Kabuli</i>    | <i>Ca_Kabuli_Chr03</i>       | 32865549                       | (C/T)       |
| 4560        | CakSNP4560     | <i>Kabuli</i>    | <i>Ca_Kabuli_Chr03</i>       | 32865530                       | (C/G)       |
| 4561        | CakSNP4561     | <i>Kabuli</i>    | <i>Ca_Kabuli_Chr03</i>       | 32954428                       | (T/C)       |

| <b>S.N.</b> | <b>SNP IDs</b> | <b>Cultivars</b> | <b>Chromosomes/scaffolds</b> | <b>Physical positions (bp)</b> | <b>SNPs</b> |
|-------------|----------------|------------------|------------------------------|--------------------------------|-------------|
| 4562        | CakSNP4562     | <i>Kabuli</i>    | <i>Ca_Kabuli_Chr03</i>       | 33033245                       | (T/C)       |
| 4563        | CakSNP4563     | <i>Kabuli</i>    | <i>Ca_Kabuli_Chr03</i>       | 33091737                       | (A/C)       |
| 4564        | CakSNP4564     | <i>Kabuli</i>    | <i>Ca_Kabuli_Chr03</i>       | 33120619                       | (G/A)       |
| 4565        | CakSNP4565     | <i>Kabuli</i>    | <i>Ca_Kabuli_Chr03</i>       | 33120825                       | (G/A)       |
| 4566        | CakSNP4566     | <i>Kabuli</i>    | <i>Ca_Kabuli_Chr03</i>       | 33520615                       | (A/C)       |
| 4567        | CakSNP4567     | <i>Kabuli</i>    | <i>Ca_Kabuli_Chr03</i>       | 33520887                       | (G/A)       |
| 4568        | CakSNP4568     | <i>Kabuli</i>    | <i>Ca_Kabuli_Chr03</i>       | 33522974                       | (G/A)       |
| 4569        | CakSNP4569     | <i>Kabuli</i>    | <i>Ca_Kabuli_Chr03</i>       | 33533273                       | (G/A)       |
| 4570        | CakSNP4570     | <i>Kabuli</i>    | <i>Ca_Kabuli_Chr03</i>       | 33627826                       | (A/C)       |
| 4571        | CakSNP4571     | <i>Kabuli</i>    | <i>Ca_Kabuli_Chr03</i>       | 33715215                       | (G/T)       |
| 4572        | CakSNP4572     | <i>Kabuli</i>    | <i>Ca_Kabuli_Chr03</i>       | 33898250                       | (C/T)       |
| 4573        | CakSNP4573     | <i>Kabuli</i>    | <i>Ca_Kabuli_Chr03</i>       | 33900522                       | (A/G)       |
| 4574        | CakSNP4574     | <i>Kabuli</i>    | <i>Ca_Kabuli_Chr03</i>       | 33900533                       | (A/G)       |
| 4575        | CakSNP4575     | <i>Kabuli</i>    | <i>Ca_Kabuli_Chr03</i>       | 33904394                       | (T/A)       |
| 4576        | CakSNP4576     | <i>Kabuli</i>    | <i>Ca_Kabuli_Chr03</i>       | 34247736                       | (T/G)       |
| 4577        | CakSNP4577     | <i>Kabuli</i>    | <i>Ca_Kabuli_Chr03</i>       | 34247831                       | (G/A)       |
| 4578        | CakSNP4578     | <i>Kabuli</i>    | <i>Ca_Kabuli_Chr03</i>       | 34247828                       | (T/C)       |
| 4579        | CakSNP4579     | <i>Kabuli</i>    | <i>Ca_Kabuli_Chr03</i>       | 34247893                       | (A/G)       |
| 4580        | CakSNP4580     | <i>Kabuli</i>    | <i>Ca_Kabuli_Chr03</i>       | 34268356                       | (A/T)       |
| 4581        | CakSNP4581     | <i>Kabuli</i>    | <i>Ca_Kabuli_Chr03</i>       | 34282419                       | (C/T)       |
| 4582        | CakSNP4582     | <i>Kabuli</i>    | <i>Ca_Kabuli_Chr03</i>       | 34290129                       | (T/C)       |
| 4583        | CakSNP4583     | <i>Kabuli</i>    | <i>Ca_Kabuli_Chr03</i>       | 34290135                       | (G/A)       |
| 4584        | CakSNP4584     | <i>Kabuli</i>    | <i>Ca_Kabuli_Chr03</i>       | 34290173                       | (C/T)       |
| 4585        | CakSNP4585     | <i>Kabuli</i>    | <i>Ca_Kabuli_Chr03</i>       | 34352385                       | (A/C)       |
| 4586        | CakSNP4586     | <i>Kabuli</i>    | <i>Ca_Kabuli_Chr03</i>       | 34356844                       | (A/C)       |
| 4587        | CakSNP4587     | <i>Kabuli</i>    | <i>Ca_Kabuli_Chr03</i>       | 34357171                       | (T/G)       |
| 4588        | CakSNP4588     | <i>Kabuli</i>    | <i>Ca_Kabuli_Chr03</i>       | 34357296                       | (C/G)       |
| 4589        | CakSNP4589     | <i>Kabuli</i>    | <i>Ca_Kabuli_Chr03</i>       | 34496982                       | (G/C)       |
| 4590        | CakSNP4590     | <i>Kabuli</i>    | <i>Ca_Kabuli_Chr03</i>       | 34524656                       | (C/A)       |
| 4591        | CakSNP4591     | <i>Kabuli</i>    | <i>Ca_Kabuli_Chr03</i>       | 34542046                       | (T/G)       |
| 4592        | CakSNP4592     | <i>Kabuli</i>    | <i>Ca_Kabuli_Chr03</i>       | 34543039                       | (C/T)       |
| 4593        | CakSNP4593     | <i>Kabuli</i>    | <i>Ca_Kabuli_Chr03</i>       | 34543111                       | (A/G)       |
| 4594        | CakSNP4594     | <i>Kabuli</i>    | <i>Ca_Kabuli_Chr03</i>       | 34547052                       | (A/T)       |
| 4595        | CakSNP4595     | <i>Kabuli</i>    | <i>Ca_Kabuli_Chr03</i>       | 34547069                       | (G/T)       |
| 4596        | CakSNP4596     | <i>Kabuli</i>    | <i>Ca_Kabuli_Chr03</i>       | 34547141                       | (A/G)       |
| 4597        | CakSNP4597     | <i>Kabuli</i>    | <i>Ca_Kabuli_Chr03</i>       | 34576769                       | (G/A)       |
| 4598        | CakSNP4598     | <i>Kabuli</i>    | <i>Ca_Kabuli_Chr03</i>       | 34595487                       | (A/G)       |
| 4599        | CakSNP4599     | <i>Kabuli</i>    | <i>Ca_Kabuli_Chr03</i>       | 34601038                       | (T/C)       |
| 4600        | CakSNP4600     | <i>Kabuli</i>    | <i>Ca_Kabuli_Chr03</i>       | 34603669                       | (T/A)       |

| <b>S.N.</b> | <b>SNP IDs</b> | <b>Cultivars</b> | <b>Chromosomes/scaffolds</b> | <b>Physical positions (bp)</b> | <b>SNPs</b> |
|-------------|----------------|------------------|------------------------------|--------------------------------|-------------|
| 4601        | CakSNP4601     | <i>Kabuli</i>    | <i>Ca_Kabuli_Chr03</i>       | 34650308                       | (G/A)       |
| 4602        | CakSNP4602     | <i>Kabuli</i>    | <i>Ca_Kabuli_Chr03</i>       | 34650245                       | (G/A)       |
| 4603        | CakSNP4603     | <i>Kabuli</i>    | <i>Ca_Kabuli_Chr03</i>       | 34662736                       | (T/G)       |
| 4604        | CakSNP4604     | <i>Kabuli</i>    | <i>Ca_Kabuli_Chr03</i>       | 34699114                       | (C/A)       |
| 4605        | CakSNP4605     | <i>Kabuli</i>    | <i>Ca_Kabuli_Chr03</i>       | 34699076                       | (T/C)       |
| 4606        | CakSNP4606     | <i>Kabuli</i>    | <i>Ca_Kabuli_Chr03</i>       | 34722508                       | (A/T)       |
| 4607        | CakSNP4607     | <i>Kabuli</i>    | <i>Ca_Kabuli_Chr03</i>       | 34722931                       | (A/G)       |
| 4608        | CakSNP4608     | <i>Kabuli</i>    | <i>Ca_Kabuli_Chr03</i>       | 34722979                       | (T/C)       |
| 4609        | CakSNP4609     | <i>Kabuli</i>    | <i>Ca_Kabuli_Chr03</i>       | 34722992                       | (T/G)       |
| 4610        | CakSNP4610     | <i>Kabuli</i>    | <i>Ca_Kabuli_Chr03</i>       | 34730463                       | (T/C)       |
| 4611        | CakSNP4611     | <i>Kabuli</i>    | <i>Ca_Kabuli_Chr03</i>       | 34730954                       | (G/A)       |
| 4612        | CakSNP4612     | <i>Kabuli</i>    | <i>Ca_Kabuli_Chr03</i>       | 34800277                       | (G/A)       |
| 4613        | CakSNP4613     | <i>Kabuli</i>    | <i>Ca_Kabuli_Chr03</i>       | 34820472                       | (T/A)       |
| 4614        | CakSNP4614     | <i>Kabuli</i>    | <i>Ca_Kabuli_Chr03</i>       | 34820532                       | (T/A)       |
| 4615        | CakSNP4615     | <i>Kabuli</i>    | <i>Ca_Kabuli_Chr03</i>       | 34852030                       | (G/A)       |
| 4616        | CakSNP4616     | <i>Kabuli</i>    | <i>Ca_Kabuli_Chr03</i>       | 34852070                       | (T/G)       |
| 4617        | CakSNP4617     | <i>Kabuli</i>    | <i>Ca_Kabuli_Chr03</i>       | 34852047                       | (T/A)       |
| 4618        | CakSNP4618     | <i>Kabuli</i>    | <i>Ca_Kabuli_Chr03</i>       | 34889316                       | (C/G)       |
| 4619        | CakSNP4619     | <i>Kabuli</i>    | <i>Ca_Kabuli_Chr03</i>       | 34889361                       | (T/C)       |
| 4620        | CakSNP4620     | <i>Kabuli</i>    | <i>Ca_Kabuli_Chr03</i>       | 34911621                       | (G/A)       |
| 4621        | CakSNP4621     | <i>Kabuli</i>    | <i>Ca_Kabuli_Chr03</i>       | 35071821                       | (A/G)       |
| 4622        | CakSNP4622     | <i>Kabuli</i>    | <i>Ca_Kabuli_Chr03</i>       | 35071852                       | (T/G)       |
| 4623        | CakSNP4623     | <i>Kabuli</i>    | <i>Ca_Kabuli_Chr03</i>       | 35085559                       | (T/A)       |
| 4624        | CakSNP4624     | <i>Kabuli</i>    | <i>Ca_Kabuli_Chr03</i>       | 35085658                       | (C/A)       |
| 4625        | CakSNP4625     | <i>Kabuli</i>    | <i>Ca_Kabuli_Chr03</i>       | 35126649                       | (C/G)       |
| 4626        | CakSNP4626     | <i>Kabuli</i>    | <i>Ca_Kabuli_Chr03</i>       | 35126766                       | (G/A)       |
| 4627        | CakSNP4627     | <i>Kabuli</i>    | <i>Ca_Kabuli_Chr03</i>       | 35126760                       | (G/A)       |
| 4628        | CakSNP4628     | <i>Kabuli</i>    | <i>Ca_Kabuli_Chr03</i>       | 35167312                       | (T/G)       |
| 4629        | CakSNP4629     | <i>Kabuli</i>    | <i>Ca_Kabuli_Chr03</i>       | 35167359                       | (T/G)       |
| 4630        | CakSNP4630     | <i>Kabuli</i>    | <i>Ca_Kabuli_Chr03</i>       | 35185001                       | (G/T)       |
| 4631        | CakSNP4631     | <i>Kabuli</i>    | <i>Ca_Kabuli_Chr03</i>       | 35274992                       | (A/G)       |
| 4632        | CakSNP4632     | <i>Kabuli</i>    | <i>Ca_Kabuli_Chr03</i>       | 35275199                       | (T/C)       |
| 4633        | CakSNP4633     | <i>Kabuli</i>    | <i>Ca_Kabuli_Chr03</i>       | 35332088                       | (T/A)       |
| 4634        | CakSNP4634     | <i>Kabuli</i>    | <i>Ca_Kabuli_Chr03</i>       | 35332091                       | (T/C)       |
| 4635        | CakSNP4635     | <i>Kabuli</i>    | <i>Ca_Kabuli_Chr03</i>       | 35383318                       | (C/T)       |
| 4636        | CakSNP4636     | <i>Kabuli</i>    | <i>Ca_Kabuli_Chr03</i>       | 35394684                       | (G/T)       |
| 4637        | CakSNP4637     | <i>Kabuli</i>    | <i>Ca_Kabuli_Chr03</i>       | 35403074                       | (A/G)       |
| 4638        | CakSNP4638     | <i>Kabuli</i>    | <i>Ca_Kabuli_Chr03</i>       | 35420061                       | (A/G)       |
| 4639        | CakSNP4639     | <i>Kabuli</i>    | <i>Ca_Kabuli_Chr03</i>       | 35420108                       | (T/A)       |



| <b>S.N.</b> | <b>SNP IDs</b> | <b>Cultivars</b> | <b>Chromosomes/scaffolds</b> | <b>Physical positions (bp)</b> | <b>SNPs</b> |
|-------------|----------------|------------------|------------------------------|--------------------------------|-------------|
| 4640        | CakSNP4640     | <i>Kabuli</i>    | <i>Ca_Kabuli_Chr03</i>       | 35424994                       | (T/C)       |
| 4641        | CakSNP4641     | <i>Kabuli</i>    | <i>Ca_Kabuli_Chr03</i>       | 35483932                       | (T/C)       |
| 4642        | CakSNP4642     | <i>Kabuli</i>    | <i>Ca_Kabuli_Chr03</i>       | 35483960                       | (T/C)       |
| 4643        | CakSNP4643     | <i>Kabuli</i>    | <i>Ca_Kabuli_Chr03</i>       | 35483995                       | (T/C)       |
| 4644        | CakSNP4644     | <i>Kabuli</i>    | <i>Ca_Kabuli_Chr03</i>       | 35483999                       | (C/T)       |
| 4645        | CakSNP4645     | <i>Kabuli</i>    | <i>Ca_Kabuli_Chr03</i>       | 35484034                       | (G/C)       |
| 4646        | CakSNP4646     | <i>Kabuli</i>    | <i>Ca_Kabuli_Chr03</i>       | 35487736                       | (T/C)       |
| 4647        | CakSNP4647     | <i>Kabuli</i>    | <i>Ca_Kabuli_Chr03</i>       | 35488503                       | (A/C)       |
| 4648        | CakSNP4648     | <i>Kabuli</i>    | <i>Ca_Kabuli_Chr03</i>       | 35488597                       | (T/C)       |
| 4649        | CakSNP4649     | <i>Kabuli</i>    | <i>Ca_Kabuli_Chr03</i>       | 35488570                       | (G/T)       |
| 4650        | CakSNP4650     | <i>Kabuli</i>    | <i>Ca_Kabuli_Chr03</i>       | 35490991                       | (A/G)       |
| 4651        | CakSNP4651     | <i>Kabuli</i>    | <i>Ca_Kabuli_Chr03</i>       | 35490951                       | (C/T)       |
| 4652        | CakSNP4652     | <i>Kabuli</i>    | <i>Ca_Kabuli_Chr03</i>       | 35543614                       | (C/T)       |
| 4653        | CakSNP4653     | <i>Kabuli</i>    | <i>Ca_Kabuli_Chr03</i>       | 35631679                       | (C/G)       |
| 4654        | CakSNP4654     | <i>Kabuli</i>    | <i>Ca_Kabuli_Chr03</i>       | 35631689                       | (C/A)       |
| 4655        | CakSNP4655     | <i>Kabuli</i>    | <i>Ca_Kabuli_Chr03</i>       | 35631723                       | (A/G)       |
| 4656        | CakSNP4656     | <i>Kabuli</i>    | <i>Ca_Kabuli_Chr03</i>       | 35647986                       | (C/G)       |
| 4657        | CakSNP4657     | <i>Kabuli</i>    | <i>Ca_Kabuli_Chr03</i>       | 35747394                       | (C/G)       |
| 4658        | CakSNP4658     | <i>Kabuli</i>    | <i>Ca_Kabuli_Chr03</i>       | 35807222                       | (A/G)       |
| 4659        | CakSNP4659     | <i>Kabuli</i>    | <i>Ca_Kabuli_Chr03</i>       | 35807265                       | (T/C)       |
| 4660        | CakSNP4660     | <i>Kabuli</i>    | <i>Ca_Kabuli_Chr03</i>       | 35807407                       | (A/T)       |
| 4661        | CakSNP4661     | <i>Kabuli</i>    | <i>Ca_Kabuli_Chr03</i>       | 35829834                       | (A/G)       |
| 4662        | CakSNP4662     | <i>Kabuli</i>    | <i>Ca_Kabuli_Chr03</i>       | 35898320                       | (G/C)       |
| 4663        | CakSNP4663     | <i>Kabuli</i>    | <i>Ca_Kabuli_Chr03</i>       | 35898374                       | (G/A)       |
| 4664        | CakSNP4664     | <i>Kabuli</i>    | <i>Ca_Kabuli_Chr03</i>       | 35898581                       | (C/T)       |
| 4665        | CakSNP4665     | <i>Kabuli</i>    | <i>Ca_Kabuli_Chr03</i>       | 35920684                       | (A/C)       |
| 4666        | CakSNP4666     | <i>Kabuli</i>    | <i>Ca_Kabuli_Chr03</i>       | 35920860                       | (C/A)       |
| 4667        | CakSNP4667     | <i>Kabuli</i>    | <i>Ca_Kabuli_Chr03</i>       | 35948487                       | (G/A)       |
| 4668        | CakSNP4668     | <i>Kabuli</i>    | <i>Ca_Kabuli_Chr03</i>       | 35979412                       | (G/T)       |
| 4669        | CakSNP4669     | <i>Kabuli</i>    | <i>Ca_Kabuli_Chr03</i>       | 36003699                       | (G/A)       |
| 4670        | CakSNP4670     | <i>Kabuli</i>    | <i>Ca_Kabuli_Chr03</i>       | 36003682                       | (G/T)       |
| 4671        | CakSNP4671     | <i>Kabuli</i>    | <i>Ca_Kabuli_Chr03</i>       | 36004638                       | (C/T)       |
| 4672        | CakSNP4672     | <i>Kabuli</i>    | <i>Ca_Kabuli_Chr03</i>       | 36004663                       | (T/C)       |
| 4673        | CakSNP4673     | <i>Kabuli</i>    | <i>Ca_Kabuli_Chr03</i>       | 36004668                       | (A/G)       |
| 4674        | CakSNP4674     | <i>Kabuli</i>    | <i>Ca_Kabuli_Chr03</i>       | 36046759                       | (G/A)       |
| 4675        | CakSNP4675     | <i>Kabuli</i>    | <i>Ca_Kabuli_Chr03</i>       | 36046938                       | (C/T)       |
| 4676        | CakSNP4676     | <i>Kabuli</i>    | <i>Ca_Kabuli_Chr03</i>       | 36046956                       | (A/C)       |
| 4677        | CakSNP4677     | <i>Kabuli</i>    | <i>Ca_Kabuli_Chr03</i>       | 36050259                       | (T/G)       |
| 4678        | CakSNP4678     | <i>Kabuli</i>    | <i>Ca_Kabuli_Chr03</i>       | 36050319                       | (T/C)       |

| <b>S.N.</b> | <b>SNP IDs</b> | <b>Cultivars</b> | <b>Chromosomes/scaffolds</b> | <b>Physical positions (bp)</b> | <b>SNPs</b> |
|-------------|----------------|------------------|------------------------------|--------------------------------|-------------|
| 4679        | CakSNP4679     | <i>Kabuli</i>    | <i>Ca_Kabuli_Chr03</i>       | 36071033                       | (A/G)       |
| 4680        | CakSNP4680     | <i>Kabuli</i>    | <i>Ca_Kabuli_Chr03</i>       | 36085966                       | (G/A)       |
| 4681        | CakSNP4681     | <i>Kabuli</i>    | <i>Ca_Kabuli_Chr03</i>       | 36117521                       | (A/G)       |
| 4682        | CakSNP4682     | <i>Kabuli</i>    | <i>Ca_Kabuli_Chr03</i>       | 36118120                       | (T/C)       |
| 4683        | CakSNP4683     | <i>Kabuli</i>    | <i>Ca_Kabuli_Chr03</i>       | 36118156                       | (C/T)       |
| 4684        | CakSNP4684     | <i>Kabuli</i>    | <i>Ca_Kabuli_Chr03</i>       | 36119592                       | (T/C)       |
| 4685        | CakSNP4685     | <i>Kabuli</i>    | <i>Ca_Kabuli_Chr03</i>       | 36119602                       | (C/A)       |
| 4686        | CakSNP4686     | <i>Kabuli</i>    | <i>Ca_Kabuli_Chr03</i>       | 36130561                       | (T/A)       |
| 4687        | CakSNP4687     | <i>Kabuli</i>    | <i>Ca_Kabuli_Chr03</i>       | 36130610                       | (C/A)       |
| 4688        | CakSNP4688     | <i>Kabuli</i>    | <i>Ca_Kabuli_Chr03</i>       | 36132440                       | (T/C)       |
| 4689        | CakSNP4689     | <i>Kabuli</i>    | <i>Ca_Kabuli_Chr03</i>       | 36132437                       | (C/T)       |
| 4690        | CakSNP4690     | <i>Kabuli</i>    | <i>Ca_Kabuli_Chr03</i>       | 36132401                       | (C/T)       |
| 4691        | CakSNP4691     | <i>Kabuli</i>    | <i>Ca_Kabuli_Chr03</i>       | 36132480                       | (C/T)       |
| 4692        | CakSNP4692     | <i>Kabuli</i>    | <i>Ca_Kabuli_Chr03</i>       | 36132539                       | (C/T)       |
| 4693        | CakSNP4693     | <i>Kabuli</i>    | <i>Ca_Kabuli_Chr03</i>       | 36132586                       | (T/G)       |
| 4694        | CakSNP4694     | <i>Kabuli</i>    | <i>Ca_Kabuli_Chr03</i>       | 36132570                       | (G/A)       |
| 4695        | CakSNP4695     | <i>Kabuli</i>    | <i>Ca_Kabuli_Chr03</i>       | 36132554                       | (A/T)       |
| 4696        | CakSNP4696     | <i>Kabuli</i>    | <i>Ca_Kabuli_Chr03</i>       | 36150722                       | (G/A)       |
| 4697        | CakSNP4697     | <i>Kabuli</i>    | <i>Ca_Kabuli_Chr03</i>       | 36150717                       | (T/C)       |
| 4698        | CakSNP4698     | <i>Kabuli</i>    | <i>Ca_Kabuli_Chr03</i>       | 36164863                       | (T/G)       |
| 4699        | CakSNP4699     | <i>Kabuli</i>    | <i>Ca_Kabuli_Chr03</i>       | 36164866                       | (T/C)       |
| 4700        | CakSNP4700     | <i>Kabuli</i>    | <i>Ca_Kabuli_Chr03</i>       | 36165997                       | (C/G)       |
| 4701        | CakSNP4701     | <i>Kabuli</i>    | <i>Ca_Kabuli_Chr03</i>       | 36167136                       | (G/T)       |
| 4702        | CakSNP4702     | <i>Kabuli</i>    | <i>Ca_Kabuli_Chr03</i>       | 36175164                       | (G/A)       |
| 4703        | CakSNP4703     | <i>Kabuli</i>    | <i>Ca_Kabuli_Chr03</i>       | 36177201                       | (T/C)       |
| 4704        | CakSNP4704     | <i>Kabuli</i>    | <i>Ca_Kabuli_Chr03</i>       | 36205806                       | (T/G)       |
| 4705        | CakSNP4705     | <i>Kabuli</i>    | <i>Ca_Kabuli_Chr03</i>       | 36205819                       | (A/G)       |
| 4706        | CakSNP4706     | <i>Kabuli</i>    | <i>Ca_Kabuli_Chr03</i>       | 36205845                       | (A/G)       |
| 4707        | CakSNP4707     | <i>Kabuli</i>    | <i>Ca_Kabuli_Chr03</i>       | 36206615                       | (A/C)       |
| 4708        | CakSNP4708     | <i>Kabuli</i>    | <i>Ca_Kabuli_Chr03</i>       | 36212799                       | (A/T)       |
| 4709        | CakSNP4709     | <i>Kabuli</i>    | <i>Ca_Kabuli_Chr03</i>       | 36212809                       | (G/A)       |
| 4710        | CakSNP4710     | <i>Kabuli</i>    | <i>Ca_Kabuli_Chr03</i>       | 36212843                       | (T/A)       |
| 4711        | CakSNP4711     | <i>Kabuli</i>    | <i>Ca_Kabuli_Chr03</i>       | 36217686                       | (G/A)       |
| 4712        | CakSNP4712     | <i>Kabuli</i>    | <i>Ca_Kabuli_Chr03</i>       | 36227565                       | (A/T)       |
| 4713        | CakSNP4713     | <i>Kabuli</i>    | <i>Ca_Kabuli_Chr03</i>       | 36227566                       | (A/T)       |
| 4714        | CakSNP4714     | <i>Kabuli</i>    | <i>Ca_Kabuli_Chr03</i>       | 36227948                       | (A/G)       |
| 4715        | CakSNP4715     | <i>Kabuli</i>    | <i>Ca_Kabuli_Chr03</i>       | 36227949                       | (C/T)       |
| 4716        | CakSNP4716     | <i>Kabuli</i>    | <i>Ca_Kabuli_Chr03</i>       | 36228078                       | (G/A)       |
| 4717        | CakSNP4717     | <i>Kabuli</i>    | <i>Ca_Kabuli_Chr03</i>       | 36228032                       | (G/T)       |

| <b>S.N.</b> | <b>SNP IDs</b> | <b>Cultivars</b> | <b>Chromosomes/scaffolds</b> | <b>Physical positions (bp)</b> | <b>SNPs</b> |
|-------------|----------------|------------------|------------------------------|--------------------------------|-------------|
| 4718        | CakSNP4718     | <i>Kabuli</i>    | <i>Ca_Kabuli_Chr03</i>       | 36228121                       | (T/A)       |
| 4719        | CakSNP4719     | <i>Kabuli</i>    | <i>Ca_Kabuli_Chr03</i>       | 36228126                       | (T/A)       |
| 4720        | CakSNP4720     | <i>Kabuli</i>    | <i>Ca_Kabuli_Chr03</i>       | 36242506                       | (C/T)       |
| 4721        | CakSNP4721     | <i>Kabuli</i>    | <i>Ca_Kabuli_Chr03</i>       | 36242504                       | (C/T)       |
| 4722        | CakSNP4722     | <i>Kabuli</i>    | <i>Ca_Kabuli_Chr03</i>       | 36242490                       | (G/T)       |
| 4723        | CakSNP4723     | <i>Kabuli</i>    | <i>Ca_Kabuli_Chr03</i>       | 36242480                       | (G/C)       |
| 4724        | CakSNP4724     | <i>Kabuli</i>    | <i>Ca_Kabuli_Chr03</i>       | 36247792                       | (T/C)       |
| 4725        | CakSNP4725     | <i>Kabuli</i>    | <i>Ca_Kabuli_Chr03</i>       | 36260865                       | (C/A)       |
| 4726        | CakSNP4726     | <i>Kabuli</i>    | <i>Ca_Kabuli_Chr03</i>       | 36282091                       | (T/G)       |
| 4727        | CakSNP4727     | <i>Kabuli</i>    | <i>Ca_Kabuli_Chr03</i>       | 36293589                       | (A/G)       |
| 4728        | CakSNP4728     | <i>Kabuli</i>    | <i>Ca_Kabuli_Chr03</i>       | 36293625                       | (C/T)       |
| 4729        | CakSNP4729     | <i>Kabuli</i>    | <i>Ca_Kabuli_Chr03</i>       | 36293637                       | (C/T)       |
| 4730        | CakSNP4730     | <i>Kabuli</i>    | <i>Ca_Kabuli_Chr03</i>       | 36330750                       | (A/G)       |
| 4731        | CakSNP4731     | <i>Kabuli</i>    | <i>Ca_Kabuli_Chr03</i>       | 36330815                       | (T/C)       |
| 4732        | CakSNP4732     | <i>Kabuli</i>    | <i>Ca_Kabuli_Chr03</i>       | 36345158                       | (T/C)       |
| 4733        | CakSNP4733     | <i>Kabuli</i>    | <i>Ca_Kabuli_Chr03</i>       | 36347203                       | (T/A)       |
| 4734        | CakSNP4734     | <i>Kabuli</i>    | <i>Ca_Kabuli_Chr03</i>       | 36361339                       | (C/T)       |
| 4735        | CakSNP4735     | <i>Kabuli</i>    | <i>Ca_Kabuli_Chr03</i>       | 36378294                       | (G/T)       |
| 4736        | CakSNP4736     | <i>Kabuli</i>    | <i>Ca_Kabuli_Chr03</i>       | 36378299                       | (C/G)       |
| 4737        | CakSNP4737     | <i>Kabuli</i>    | <i>Ca_Kabuli_Chr03</i>       | 36378358                       | (G/A)       |
| 4738        | CakSNP4738     | <i>Kabuli</i>    | <i>Ca_Kabuli_Chr03</i>       | 36387615                       | (A/T)       |
| 4739        | CakSNP4739     | <i>Kabuli</i>    | <i>Ca_Kabuli_Chr03</i>       | 36387732                       | (G/A)       |
| 4740        | CakSNP4740     | <i>Kabuli</i>    | <i>Ca_Kabuli_Chr03</i>       | 36387718                       | (C/T)       |
| 4741        | CakSNP4741     | <i>Kabuli</i>    | <i>Ca_Kabuli_Chr03</i>       | 36396559                       | (C/A)       |
| 4742        | CakSNP4742     | <i>Kabuli</i>    | <i>Ca_Kabuli_Chr03</i>       | 36420902                       | (T/C)       |
| 4743        | CakSNP4743     | <i>Kabuli</i>    | <i>Ca_Kabuli_Chr03</i>       | 36432389                       | (A/G)       |
| 4744        | CakSNP4744     | <i>Kabuli</i>    | <i>Ca_Kabuli_Chr03</i>       | 36447274                       | (G/A)       |
| 4745        | CakSNP4745     | <i>Kabuli</i>    | <i>Ca_Kabuli_Chr03</i>       | 36447364                       | (T/A)       |
| 4746        | CakSNP4746     | <i>Kabuli</i>    | <i>Ca_Kabuli_Chr03</i>       | 36447520                       | (T/A)       |
| 4747        | CakSNP4747     | <i>Kabuli</i>    | <i>Ca_Kabuli_Chr03</i>       | 36447525                       | (C/T)       |
| 4748        | CakSNP4748     | <i>Kabuli</i>    | <i>Ca_Kabuli_Chr03</i>       | 36488722                       | (T/A)       |
| 4749        | CakSNP4749     | <i>Kabuli</i>    | <i>Ca_Kabuli_Chr03</i>       | 36488736                       | (T/C)       |
| 4750        | CakSNP4750     | <i>Kabuli</i>    | <i>Ca_Kabuli_Chr03</i>       | 36488853                       | (A/G)       |
| 4751        | CakSNP4751     | <i>Kabuli</i>    | <i>Ca_Kabuli_Chr03</i>       | 36488890                       | (A/G)       |
| 4752        | CakSNP4752     | <i>Kabuli</i>    | <i>Ca_Kabuli_Chr03</i>       | 36503906                       | (C/T)       |
| 4753        | CakSNP4753     | <i>Kabuli</i>    | <i>Ca_Kabuli_Chr03</i>       | 36503912                       | (T/C)       |
| 4754        | CakSNP4754     | <i>Kabuli</i>    | <i>Ca_Kabuli_Chr03</i>       | 36524598                       | (G/C)       |
| 4755        | CakSNP4755     | <i>Kabuli</i>    | <i>Ca_Kabuli_Chr03</i>       | 36524635                       | (A/G)       |
| 4756        | CakSNP4756     | <i>Kabuli</i>    | <i>Ca_Kabuli_Chr03</i>       | 36524659                       | (T/C)       |

| <b>S.N.</b> | <b>SNP IDs</b> | <b>Cultivars</b> | <b>Chromosomes/scaffolds</b> | <b>Physical positions (bp)</b> | <b>SNPs</b> |
|-------------|----------------|------------------|------------------------------|--------------------------------|-------------|
| 4757        | CakSNP4757     | <i>Kabuli</i>    | <i>Ca_Kabuli_Chr03</i>       | 36531151                       | (C/A)       |
| 4758        | CakSNP4758     | <i>Kabuli</i>    | <i>Ca_Kabuli_Chr03</i>       | 36588856                       | (C/T)       |
| 4759        | CakSNP4759     | <i>Kabuli</i>    | <i>Ca_Kabuli_Chr03</i>       | 36588896                       | (C/G)       |
| 4760        | CakSNP4760     | <i>Kabuli</i>    | <i>Ca_Kabuli_Chr03</i>       | 36606527                       | (G/A)       |
| 4761        | CakSNP4761     | <i>Kabuli</i>    | <i>Ca_Kabuli_Chr03</i>       | 36609043                       | (G/A)       |
| 4762        | CakSNP4762     | <i>Kabuli</i>    | <i>Ca_Kabuli_Chr03</i>       | 36616855                       | (T/C)       |
| 4763        | CakSNP4763     | <i>Kabuli</i>    | <i>Ca_Kabuli_Chr03</i>       | 36644117                       | (A/T)       |
| 4764        | CakSNP4764     | <i>Kabuli</i>    | <i>Ca_Kabuli_Chr03</i>       | 36733097                       | (G/A)       |
| 4765        | CakSNP4765     | <i>Kabuli</i>    | <i>Ca_Kabuli_Chr03</i>       | 36733157                       | (A/G)       |
| 4766        | CakSNP4766     | <i>Kabuli</i>    | <i>Ca_Kabuli_Chr03</i>       | 36733211                       | (A/G)       |
| 4767        | CakSNP4767     | <i>Kabuli</i>    | <i>Ca_Kabuli_Chr03</i>       | 36749775                       | (T/A)       |
| 4768        | CakSNP4768     | <i>Kabuli</i>    | <i>Ca_Kabuli_Chr03</i>       | 36749826                       | (G/A)       |
| 4769        | CakSNP4769     | <i>Kabuli</i>    | <i>Ca_Kabuli_Chr03</i>       | 36749829                       | (T/C)       |
| 4770        | CakSNP4770     | <i>Kabuli</i>    | <i>Ca_Kabuli_Chr03</i>       | 36749831                       | (T/C)       |
| 4771        | CakSNP4771     | <i>Kabuli</i>    | <i>Ca_Kabuli_Chr03</i>       | 36749871                       | (T/C)       |
| 4772        | CakSNP4772     | <i>Kabuli</i>    | <i>Ca_Kabuli_Chr03</i>       | 36749904                       | (C/T)       |
| 4773        | CakSNP4773     | <i>Kabuli</i>    | <i>Ca_Kabuli_Chr03</i>       | 36749916                       | (C/A)       |
| 4774        | CakSNP4774     | <i>Kabuli</i>    | <i>Ca_Kabuli_Chr03</i>       | 36752689                       | (T/G)       |
| 4775        | CakSNP4775     | <i>Kabuli</i>    | <i>Ca_Kabuli_Chr03</i>       | 36769775                       | (G/T)       |
| 4776        | CakSNP4776     | <i>Kabuli</i>    | <i>Ca_Kabuli_Chr03</i>       | 36783494                       | (T/A)       |
| 4777        | CakSNP4777     | <i>Kabuli</i>    | <i>Ca_Kabuli_Chr03</i>       | 36825463                       | (T/C)       |
| 4778        | CakSNP4778     | <i>Kabuli</i>    | <i>Ca_Kabuli_Chr03</i>       | 36860134                       | (A/G)       |
| 4779        | CakSNP4779     | <i>Kabuli</i>    | <i>Ca_Kabuli_Chr03</i>       | 36860246                       | (T/C)       |
| 4780        | CakSNP4780     | <i>Kabuli</i>    | <i>Ca_Kabuli_Chr03</i>       | 36873720                       | (T/C)       |
| 4781        | CakSNP4781     | <i>Kabuli</i>    | <i>Ca_Kabuli_Chr03</i>       | 36883268                       | (T/C)       |
| 4782        | CakSNP4782     | <i>Kabuli</i>    | <i>Ca_Kabuli_Chr03</i>       | 36883333                       | (A/T)       |
| 4783        | CakSNP4783     | <i>Kabuli</i>    | <i>Ca_Kabuli_Chr03</i>       | 36895362                       | (T/C)       |
| 4784        | CakSNP4784     | <i>Kabuli</i>    | <i>Ca_Kabuli_Chr03</i>       | 36938148                       | (A/G)       |
| 4785        | CakSNP4785     | <i>Kabuli</i>    | <i>Ca_Kabuli_Chr03</i>       | 36938271                       | (G/C)       |
| 4786        | CakSNP4786     | <i>Kabuli</i>    | <i>Ca_Kabuli_Chr03</i>       | 36943522                       | (A/G)       |
| 4787        | CakSNP4787     | <i>Kabuli</i>    | <i>Ca_Kabuli_Chr03</i>       | 36991718                       | (C/A)       |
| 4788        | CakSNP4788     | <i>Kabuli</i>    | <i>Ca_Kabuli_Chr03</i>       | 37003976                       | (C/T)       |
| 4789        | CakSNP4789     | <i>Kabuli</i>    | <i>Ca_Kabuli_Chr03</i>       | 37004026                       | (A/G)       |
| 4790        | CakSNP4790     | <i>Kabuli</i>    | <i>Ca_Kabuli_Chr03</i>       | 37022354                       | (A/G)       |
| 4791        | CakSNP4791     | <i>Kabuli</i>    | <i>Ca_Kabuli_Chr03</i>       | 37034618                       | (G/A)       |
| 4792        | CakSNP4792     | <i>Kabuli</i>    | <i>Ca_Kabuli_Chr03</i>       | 37067095                       | (T/G)       |
| 4793        | CakSNP4793     | <i>Kabuli</i>    | <i>Ca_Kabuli_Chr03</i>       | 37072289                       | (A/G)       |
| 4794        | CakSNP4794     | <i>Kabuli</i>    | <i>Ca_Kabuli_Chr03</i>       | 37072276                       | (T/G)       |
| 4795        | CakSNP4795     | <i>Kabuli</i>    | <i>Ca_Kabuli_Chr03</i>       | 37072312                       | (T/C)       |

| <b>S.N.</b> | <b>SNP IDs</b> | <b>Cultivars</b> | <b>Chromosomes/scaffolds</b> | <b>Physical positions (bp)</b> | <b>SNPs</b> |
|-------------|----------------|------------------|------------------------------|--------------------------------|-------------|
| 4796        | CakSNP4796     | <i>Kabuli</i>    | <i>Ca_Kabuli_Chr03</i>       | 37077087                       | (G/T)       |
| 4797        | CakSNP4797     | <i>Kabuli</i>    | <i>Ca_Kabuli_Chr03</i>       | 37090968                       | (T/C)       |
| 4798        | CakSNP4798     | <i>Kabuli</i>    | <i>Ca_Kabuli_Chr03</i>       | 37091004                       | (A/G)       |
| 4799        | CakSNP4799     | <i>Kabuli</i>    | <i>Ca_Kabuli_Chr03</i>       | 37094437                       | (T/C)       |
| 4800        | CakSNP4800     | <i>Kabuli</i>    | <i>Ca_Kabuli_Chr03</i>       | 37100897                       | (G/T)       |
| 4801        | CakSNP4801     | <i>Kabuli</i>    | <i>Ca_Kabuli_Chr03</i>       | 37101339                       | (A/T)       |
| 4802        | CakSNP4802     | <i>Kabuli</i>    | <i>Ca_Kabuli_Chr03</i>       | 37101433                       | (T/G)       |
| 4803        | CakSNP4803     | <i>Kabuli</i>    | <i>Ca_Kabuli_Chr03</i>       | 37101409                       | (A/G)       |
| 4804        | CakSNP4804     | <i>Kabuli</i>    | <i>Ca_Kabuli_Chr03</i>       | 37108762                       | (A/G)       |
| 4805        | CakSNP4805     | <i>Kabuli</i>    | <i>Ca_Kabuli_Chr03</i>       | 37108908                       | (A/G)       |
| 4806        | CakSNP4806     | <i>Kabuli</i>    | <i>Ca_Kabuli_Chr03</i>       | 37108904                       | (A/T)       |
| 4807        | CakSNP4807     | <i>Kabuli</i>    | <i>Ca_Kabuli_Chr03</i>       | 37108876                       | (C/A)       |
| 4808        | CakSNP4808     | <i>Kabuli</i>    | <i>Ca_Kabuli_Chr03</i>       | 37110070                       | (A/G)       |
| 4809        | CakSNP4809     | <i>Kabuli</i>    | <i>Ca_Kabuli_Chr03</i>       | 37110124                       | (A/T)       |
| 4810        | CakSNP4810     | <i>Kabuli</i>    | <i>Ca_Kabuli_Chr03</i>       | 37146766                       | (C/G)       |
| 4811        | CakSNP4811     | <i>Kabuli</i>    | <i>Ca_Kabuli_Chr03</i>       | 37146840                       | (A/G)       |
| 4812        | CakSNP4812     | <i>Kabuli</i>    | <i>Ca_Kabuli_Chr03</i>       | 37154761                       | (T/G)       |
| 4813        | CakSNP4813     | <i>Kabuli</i>    | <i>Ca_Kabuli_Chr03</i>       | 37154857                       | (T/C)       |
| 4814        | CakSNP4814     | <i>Kabuli</i>    | <i>Ca_Kabuli_Chr03</i>       | 37154938                       | (A/C)       |
| 4815        | CakSNP4815     | <i>Kabuli</i>    | <i>Ca_Kabuli_Chr03</i>       | 37154957                       | (C/A)       |
| 4816        | CakSNP4816     | <i>Kabuli</i>    | <i>Ca_Kabuli_Chr03</i>       | 37155925                       | (G/A)       |
| 4817        | CakSNP4817     | <i>Kabuli</i>    | <i>Ca_Kabuli_Chr03</i>       | 37156951                       | (A/G)       |
| 4818        | CakSNP4818     | <i>Kabuli</i>    | <i>Ca_Kabuli_Chr03</i>       | 37160822                       | (G/T)       |
| 4819        | CakSNP4819     | <i>Kabuli</i>    | <i>Ca_Kabuli_Chr03</i>       | 37160939                       | (A/G)       |
| 4820        | CakSNP4820     | <i>Kabuli</i>    | <i>Ca_Kabuli_Chr03</i>       | 37164633                       | (T/C)       |
| 4821        | CakSNP4821     | <i>Kabuli</i>    | <i>Ca_Kabuli_Chr03</i>       | 37170249                       | (C/T)       |
| 4822        | CakSNP4822     | <i>Kabuli</i>    | <i>Ca_Kabuli_Chr03</i>       | 37271869                       | (T/C)       |
| 4823        | CakSNP4823     | <i>Kabuli</i>    | <i>Ca_Kabuli_Chr03</i>       | 37300206                       | (T/G)       |
| 4824        | CakSNP4824     | <i>Kabuli</i>    | <i>Ca_Kabuli_Chr03</i>       | 37303478                       | (G/A)       |
| 4825        | CakSNP4825     | <i>Kabuli</i>    | <i>Ca_Kabuli_Chr03</i>       | 37308614                       | (T/C)       |
| 4826        | CakSNP4826     | <i>Kabuli</i>    | <i>Ca_Kabuli_Chr03</i>       | 37309420                       | (A/C)       |
| 4827        | CakSNP4827     | <i>Kabuli</i>    | <i>Ca_Kabuli_Chr03</i>       | 37316736                       | (T/C)       |
| 4828        | CakSNP4828     | <i>Kabuli</i>    | <i>Ca_Kabuli_Chr03</i>       | 37316737                       | (C/T)       |
| 4829        | CakSNP4829     | <i>Kabuli</i>    | <i>Ca_Kabuli_Chr03</i>       | 37316782                       | (G/A)       |
| 4830        | CakSNP4830     | <i>Kabuli</i>    | <i>Ca_Kabuli_Chr03</i>       | 37355013                       | (A/G)       |
| 4831        | CakSNP4831     | <i>Kabuli</i>    | <i>Ca_Kabuli_Chr03</i>       | 37444451                       | (C/A)       |
| 4832        | CakSNP4832     | <i>Kabuli</i>    | <i>Ca_Kabuli_Chr03</i>       | 37566557                       | (C/A)       |
| 4833        | CakSNP4833     | <i>Kabuli</i>    | <i>Ca_Kabuli_Chr03</i>       | 37599142                       | (T/C)       |
| 4834        | CakSNP4834     | <i>Kabuli</i>    | <i>Ca_Kabuli_Chr03</i>       | 37604672                       | (T/A)       |

| <b>S.N.</b> | <b>SNP IDs</b> | <b>Cultivars</b> | <b>Chromosomes/scaffolds</b> | <b>Physical positions (bp)</b> | <b>SNPs</b> |
|-------------|----------------|------------------|------------------------------|--------------------------------|-------------|
| 4835        | CakSNP4835     | <i>Kabuli</i>    | <i>Ca_Kabuli_Chr03</i>       | 37630502                       | (T/C)       |
| 4836        | CakSNP4836     | <i>Kabuli</i>    | <i>Ca_Kabuli_Chr03</i>       | 37635909                       | (G/A)       |
| 4837        | CakSNP4837     | <i>Kabuli</i>    | <i>Ca_Kabuli_Chr03</i>       | 37635961                       | (C/T)       |
| 4838        | CakSNP4838     | <i>Kabuli</i>    | <i>Ca_Kabuli_Chr03</i>       | 37639300                       | (A/G)       |
| 4839        | CakSNP4839     | <i>Kabuli</i>    | <i>Ca_Kabuli_Chr03</i>       | 37682816                       | (T/C)       |
| 4840        | CakSNP4840     | <i>Kabuli</i>    | <i>Ca_Kabuli_Chr03</i>       | 37682824                       | (G/A)       |
| 4841        | CakSNP4841     | <i>Kabuli</i>    | <i>Ca_Kabuli_Chr03</i>       | 37723959                       | (C/T)       |
| 4842        | CakSNP4842     | <i>Kabuli</i>    | <i>Ca_Kabuli_Chr03</i>       | 37759329                       | (G/A)       |
| 4843        | CakSNP4843     | <i>Kabuli</i>    | <i>Ca_Kabuli_Chr03</i>       | 37765767                       | (A/C)       |
| 4844        | CakSNP4844     | <i>Kabuli</i>    | <i>Ca_Kabuli_Chr03</i>       | 37806690                       | (G/A)       |
| 4845        | CakSNP4845     | <i>Kabuli</i>    | <i>Ca_Kabuli_Chr03</i>       | 37814955                       | (A/T)       |
| 4846        | CakSNP4846     | <i>Kabuli</i>    | <i>Ca_Kabuli_Chr03</i>       | 37814954                       | (T/A)       |
| 4847        | CakSNP4847     | <i>Kabuli</i>    | <i>Ca_Kabuli_Chr03</i>       | 37816895                       | (T/A)       |
| 4848        | CakSNP4848     | <i>Kabuli</i>    | <i>Ca_Kabuli_Chr03</i>       | 37859943                       | (T/C)       |
| 4849        | CakSNP4849     | <i>Kabuli</i>    | <i>Ca_Kabuli_Chr03</i>       | 37864390                       | (C/T)       |
| 4850        | CakSNP4850     | <i>Kabuli</i>    | <i>Ca_Kabuli_Chr03</i>       | 37866258                       | (A/G)       |
| 4851        | CakSNP4851     | <i>Kabuli</i>    | <i>Ca_Kabuli_Chr03</i>       | 37886983                       | (G/T)       |
| 4852        | CakSNP4852     | <i>Kabuli</i>    | <i>Ca_Kabuli_Chr03</i>       | 37886971                       | (A/G)       |
| 4853        | CakSNP4853     | <i>Kabuli</i>    | <i>Ca_Kabuli_Chr03</i>       | 37886942                       | (A/C)       |
| 4854        | CakSNP4854     | <i>Kabuli</i>    | <i>Ca_Kabuli_Chr03</i>       | 37908317                       | (T/C)       |
| 4855        | CakSNP4855     | <i>Kabuli</i>    | <i>Ca_Kabuli_Chr03</i>       | 37908492                       | (A/C)       |
| 4856        | CakSNP4856     | <i>Kabuli</i>    | <i>Ca_Kabuli_Chr03</i>       | 37910881                       | (A/G)       |
| 4857        | CakSNP4857     | <i>Kabuli</i>    | <i>Ca_Kabuli_Chr03</i>       | 37910899                       | (T/C)       |
| 4858        | CakSNP4858     | <i>Kabuli</i>    | <i>Ca_Kabuli_Chr03</i>       | 37910911                       | (C/T)       |
| 4859        | CakSNP4859     | <i>Kabuli</i>    | <i>Ca_Kabuli_Chr03</i>       | 37913266                       | (C/T)       |
| 4860        | CakSNP4860     | <i>Kabuli</i>    | <i>Ca_Kabuli_Chr03</i>       | 37919880                       | (C/T)       |
| 4861        | CakSNP4861     | <i>Kabuli</i>    | <i>Ca_Kabuli_Chr03</i>       | 37942807                       | (A/G)       |
| 4862        | CakSNP4862     | <i>Kabuli</i>    | <i>Ca_Kabuli_Chr03</i>       | 37942962                       | (T/C)       |
| 4863        | CakSNP4863     | <i>Kabuli</i>    | <i>Ca_Kabuli_Chr03</i>       | 37985612                       | (A/C)       |
| 4864        | CakSNP4864     | <i>Kabuli</i>    | <i>Ca_Kabuli_Chr03</i>       | 37985652                       | (C/T)       |
| 4865        | CakSNP4865     | <i>Kabuli</i>    | <i>Ca_Kabuli_Chr03</i>       | 37985776                       | (T/A)       |
| 4866        | CakSNP4866     | <i>Kabuli</i>    | <i>Ca_Kabuli_Chr03</i>       | 37985977                       | (A/G)       |
| 4867        | CakSNP4867     | <i>Kabuli</i>    | <i>Ca_Kabuli_Chr03</i>       | 37985947                       | (A/T)       |
| 4868        | CakSNP4868     | <i>Kabuli</i>    | <i>Ca_Kabuli_Chr03</i>       | 38026470                       | (G/C)       |
| 4869        | CakSNP4869     | <i>Kabuli</i>    | <i>Ca_Kabuli_Chr03</i>       | 38026539                       | (A/G)       |
| 4870        | CakSNP4870     | <i>Kabuli</i>    | <i>Ca_Kabuli_Chr03</i>       | 38026734                       | (G/C)       |
| 4871        | CakSNP4871     | <i>Kabuli</i>    | <i>Ca_Kabuli_Chr03</i>       | 38026725                       | (G/A)       |
| 4872        | CakSNP4872     | <i>Kabuli</i>    | <i>Ca_Kabuli_Chr03</i>       | 38029095                       | (G/C)       |
| 4873        | CakSNP4873     | <i>Kabuli</i>    | <i>Ca_Kabuli_Chr03</i>       | 38033965                       | (G/A)       |

| <b>S.N.</b> | <b>SNP IDs</b> | <b>Cultivars</b> | <b>Chromosomes/scaffolds</b> | <b>Physical positions (bp)</b> | <b>SNPs</b> |
|-------------|----------------|------------------|------------------------------|--------------------------------|-------------|
| 4874        | CakSNP4874     | <i>Kabuli</i>    | <i>Ca_Kabuli_Chr03</i>       | 38033969                       | (A/G)       |
| 4875        | CakSNP4875     | <i>Kabuli</i>    | <i>Ca_Kabuli_Chr03</i>       | 38046510                       | (T/C)       |
| 4876        | CakSNP4876     | <i>Kabuli</i>    | <i>Ca_Kabuli_Chr03</i>       | 38046575                       | (A/C)       |
| 4877        | CakSNP4877     | <i>Kabuli</i>    | <i>Ca_Kabuli_Chr03</i>       | 38049996                       | (A/G)       |
| 4878        | CakSNP4878     | <i>Kabuli</i>    | <i>Ca_Kabuli_Chr03</i>       | 38059303                       | (T/C)       |
| 4879        | CakSNP4879     | <i>Kabuli</i>    | <i>Ca_Kabuli_Chr03</i>       | 38059311                       | (T/A)       |
| 4880        | CakSNP4880     | <i>Kabuli</i>    | <i>Ca_Kabuli_Chr03</i>       | 38060814                       | (A/G)       |
| 4881        | CakSNP4881     | <i>Kabuli</i>    | <i>Ca_Kabuli_Chr03</i>       | 38060755                       | (T/C)       |
| 4882        | CakSNP4882     | <i>Kabuli</i>    | <i>Ca_Kabuli_Chr03</i>       | 38060742                       | (C/T)       |
| 4883        | CakSNP4883     | <i>Kabuli</i>    | <i>Ca_Kabuli_Chr03</i>       | 38074259                       | (C/A)       |
| 4884        | CakSNP4884     | <i>Kabuli</i>    | <i>Ca_Kabuli_Chr03</i>       | 38103375                       | (T/C)       |
| 4885        | CakSNP4885     | <i>Kabuli</i>    | <i>Ca_Kabuli_Chr03</i>       | 38103378                       | (C/T)       |
| 4886        | CakSNP4886     | <i>Kabuli</i>    | <i>Ca_Kabuli_Chr03</i>       | 38103381                       | (C/T)       |
| 4887        | CakSNP4887     | <i>Kabuli</i>    | <i>Ca_Kabuli_Chr03</i>       | 38103385                       | (C/T)       |
| 4888        | CakSNP4888     | <i>Kabuli</i>    | <i>Ca_Kabuli_Chr03</i>       | 38103524                       | (C/T)       |
| 4889        | CakSNP4889     | <i>Kabuli</i>    | <i>Ca_Kabuli_Chr03</i>       | 38112801                       | (C/T)       |
| 4890        | CakSNP4890     | <i>Kabuli</i>    | <i>Ca_Kabuli_Chr03</i>       | 38112802                       | (T/C)       |
| 4891        | CakSNP4891     | <i>Kabuli</i>    | <i>Ca_Kabuli_Chr03</i>       | 38112971                       | (A/G)       |
| 4892        | CakSNP4892     | <i>Kabuli</i>    | <i>Ca_Kabuli_Chr03</i>       | 38117169                       | (T/C)       |
| 4893        | CakSNP4893     | <i>Kabuli</i>    | <i>Ca_Kabuli_Chr03</i>       | 38130415                       | (T/C)       |
| 4894        | CakSNP4894     | <i>Kabuli</i>    | <i>Ca_Kabuli_Chr03</i>       | 38130410                       | (A/G)       |
| 4895        | CakSNP4895     | <i>Kabuli</i>    | <i>Ca_Kabuli_Chr03</i>       | 38145115                       | (C/T)       |
| 4896        | CakSNP4896     | <i>Kabuli</i>    | <i>Ca_Kabuli_Chr03</i>       | 38157519                       | (T/C)       |
| 4897        | CakSNP4897     | <i>Kabuli</i>    | <i>Ca_Kabuli_Chr03</i>       | 38166074                       | (A/G)       |
| 4898        | CakSNP4898     | <i>Kabuli</i>    | <i>Ca_Kabuli_Chr03</i>       | 38166881                       | (C/T)       |
| 4899        | CakSNP4899     | <i>Kabuli</i>    | <i>Ca_Kabuli_Chr03</i>       | 38202223                       | (C/T)       |
| 4900        | CakSNP4900     | <i>Kabuli</i>    | <i>Ca_Kabuli_Chr03</i>       | 38220910                       | (T/C)       |
| 4901        | CakSNP4901     | <i>Kabuli</i>    | <i>Ca_Kabuli_Chr03</i>       | 38220949                       | (A/T)       |
| 4902        | CakSNP4902     | <i>Kabuli</i>    | <i>Ca_Kabuli_Chr03</i>       | 38220958                       | (A/G)       |
| 4903        | CakSNP4903     | <i>Kabuli</i>    | <i>Ca_Kabuli_Chr03</i>       | 38222750                       | (A/C)       |
| 4904        | CakSNP4904     | <i>Kabuli</i>    | <i>Ca_Kabuli_Chr03</i>       | 38222747                       | (G/A)       |
| 4905        | CakSNP4905     | <i>Kabuli</i>    | <i>Ca_Kabuli_Chr03</i>       | 38222733                       | (C/G)       |
| 4906        | CakSNP4906     | <i>Kabuli</i>    | <i>Ca_Kabuli_Chr03</i>       | 38228118                       | (G/T)       |
| 4907        | CakSNP4907     | <i>Kabuli</i>    | <i>Ca_Kabuli_Chr03</i>       | 38237246                       | (T/G)       |
| 4908        | CakSNP4908     | <i>Kabuli</i>    | <i>Ca_Kabuli_Chr03</i>       | 38251660                       | (C/A)       |
| 4909        | CakSNP4909     | <i>Kabuli</i>    | <i>Ca_Kabuli_Chr03</i>       | 38253654                       | (T/C)       |
| 4910        | CakSNP4910     | <i>Kabuli</i>    | <i>Ca_Kabuli_Chr03</i>       | 38258645                       | (C/A)       |
| 4911        | CakSNP4911     | <i>Kabuli</i>    | <i>Ca_Kabuli_Chr03</i>       | 38264250                       | (C/T)       |
| 4912        | CakSNP4912     | <i>Kabuli</i>    | <i>Ca_Kabuli_Chr03</i>       | 38294286                       | (C/A)       |

| <b>S.N.</b> | <b>SNP IDs</b> | <b>Cultivars</b> | <b>Chromosomes/scaffolds</b> | <b>Physical positions (bp)</b> | <b>SNPs</b> |
|-------------|----------------|------------------|------------------------------|--------------------------------|-------------|
| 4913        | CakSNP4913     | <i>Kabuli</i>    | <i>Ca_Kabuli_Chr03</i>       | 38296573                       | (A/G)       |
| 4914        | CakSNP4914     | <i>Kabuli</i>    | <i>Ca_Kabuli_Chr03</i>       | 38315560                       | (G/T)       |
| 4915        | CakSNP4915     | <i>Kabuli</i>    | <i>Ca_Kabuli_Chr03</i>       | 38321159                       | (T/C)       |
| 4916        | CakSNP4916     | <i>Kabuli</i>    | <i>Ca_Kabuli_Chr03</i>       | 38321153                       | (G/T)       |
| 4917        | CakSNP4917     | <i>Kabuli</i>    | <i>Ca_Kabuli_Chr03</i>       | 38386392                       | (T/C)       |
| 4918        | CakSNP4918     | <i>Kabuli</i>    | <i>Ca_Kabuli_Chr03</i>       | 38424238                       | (A/T)       |
| 4919        | CakSNP4919     | <i>Kabuli</i>    | <i>Ca_Kabuli_Chr03</i>       | 38452060                       | (A/C)       |
| 4920        | CakSNP4920     | <i>Kabuli</i>    | <i>Ca_Kabuli_Chr03</i>       | 38465366                       | (G/A)       |
| 4921        | CakSNP4921     | <i>Kabuli</i>    | <i>Ca_Kabuli_Chr03</i>       | 38465335                       | (G/A)       |
| 4922        | CakSNP4922     | <i>Kabuli</i>    | <i>Ca_Kabuli_Chr03</i>       | 38465440                       | (G/A)       |
| 4923        | CakSNP4923     | <i>Kabuli</i>    | <i>Ca_Kabuli_Chr03</i>       | 38496236                       | (A/G)       |
| 4924        | CakSNP4924     | <i>Kabuli</i>    | <i>Ca_Kabuli_Chr03</i>       | 38501705                       | (T/C)       |
| 4925        | CakSNP4925     | <i>Kabuli</i>    | <i>Ca_Kabuli_Chr03</i>       | 38539721                       | (T/G)       |
| 4926        | CakSNP4926     | <i>Kabuli</i>    | <i>Ca_Kabuli_Chr03</i>       | 38551142                       | (C/T)       |
| 4927        | CakSNP4927     | <i>Kabuli</i>    | <i>Ca_Kabuli_Chr03</i>       | 38555941                       | (G/A)       |
| 4928        | CakSNP4928     | <i>Kabuli</i>    | <i>Ca_Kabuli_Chr03</i>       | 38555944                       | (A/G)       |
| 4929        | CakSNP4929     | <i>Kabuli</i>    | <i>Ca_Kabuli_Chr03</i>       | 38592077                       | (G/A)       |
| 4930        | CakSNP4930     | <i>Kabuli</i>    | <i>Ca_Kabuli_Chr03</i>       | 38624786                       | (C/T)       |
| 4931        | CakSNP4931     | <i>Kabuli</i>    | <i>Ca_Kabuli_Chr03</i>       | 38624934                       | (T/C)       |
| 4932        | CakSNP4932     | <i>Kabuli</i>    | <i>Ca_Kabuli_Chr03</i>       | 38672863                       | (C/A)       |
| 4933        | CakSNP4933     | <i>Kabuli</i>    | <i>Ca_Kabuli_Chr03</i>       | 38704356                       | (C/T)       |
| 4934        | CakSNP4934     | <i>Kabuli</i>    | <i>Ca_Kabuli_Chr03</i>       | 38728528                       | (C/T)       |
| 4935        | CakSNP4935     | <i>Kabuli</i>    | <i>Ca_Kabuli_Chr03</i>       | 38728679                       | (T/C)       |
| 4936        | CakSNP4936     | <i>Kabuli</i>    | <i>Ca_Kabuli_Chr03</i>       | 38731315                       | (C/T)       |
| 4937        | CakSNP4937     | <i>Kabuli</i>    | <i>Ca_Kabuli_Chr03</i>       | 38731466                       | (T/G)       |
| 4938        | CakSNP4938     | <i>Kabuli</i>    | <i>Ca_Kabuli_Chr03</i>       | 38764372                       | (G/A)       |
| 4939        | CakSNP4939     | <i>Kabuli</i>    | <i>Ca_Kabuli_Chr03</i>       | 38764390                       | (A/C)       |
| 4940        | CakSNP4940     | <i>Kabuli</i>    | <i>Ca_Kabuli_Chr03</i>       | 38766156                       | (T/A)       |
| 4941        | CakSNP4941     | <i>Kabuli</i>    | <i>Ca_Kabuli_Chr03</i>       | 38766174                       | (A/G)       |
| 4942        | CakSNP4942     | <i>Kabuli</i>    | <i>Ca_Kabuli_Chr03</i>       | 38766311                       | (A/C)       |
| 4943        | CakSNP4943     | <i>Kabuli</i>    | <i>Ca_Kabuli_Chr03</i>       | 38771817                       | (A/G)       |
| 4944        | CakSNP4944     | <i>Kabuli</i>    | <i>Ca_Kabuli_Chr03</i>       | 38776366                       | (T/G)       |
| 4945        | CakSNP4945     | <i>Kabuli</i>    | <i>Ca_Kabuli_Chr03</i>       | 38785843                       | (C/G)       |
| 4946        | CakSNP4946     | <i>Kabuli</i>    | <i>Ca_Kabuli_Chr03</i>       | 38785845                       | (C/T)       |
| 4947        | CakSNP4947     | <i>Kabuli</i>    | <i>Ca_Kabuli_Chr03</i>       | 38793194                       | (T/C)       |
| 4948        | CakSNP4948     | <i>Kabuli</i>    | <i>Ca_Kabuli_Chr03</i>       | 38805822                       | (T/A)       |
| 4949        | CakSNP4949     | <i>Kabuli</i>    | <i>Ca_Kabuli_Chr03</i>       | 38805831                       | (A/C)       |
| 4950        | CakSNP4950     | <i>Kabuli</i>    | <i>Ca_Kabuli_Chr03</i>       | 38809132                       | (G/A)       |
| 4951        | CakSNP4951     | <i>Kabuli</i>    | <i>Ca_Kabuli_Chr03</i>       | 38810765                       | (A/T)       |



| <b>S.N.</b> | <b>SNP IDs</b> | <b>Cultivars</b> | <b>Chromosomes/scaffolds</b> | <b>Physical positions (bp)</b> | <b>SNPs</b> |
|-------------|----------------|------------------|------------------------------|--------------------------------|-------------|
| 4952        | CakSNP4952     | <i>Kabuli</i>    | <i>Ca_Kabuli_Chr03</i>       | 38818340                       | (A/G)       |
| 4953        | CakSNP4953     | <i>Kabuli</i>    | <i>Ca_Kabuli_Chr03</i>       | 38821990                       | (A/G)       |
| 4954        | CakSNP4954     | <i>Kabuli</i>    | <i>Ca_Kabuli_Chr03</i>       | 38831533                       | (T/C)       |
| 4955        | CakSNP4955     | <i>Kabuli</i>    | <i>Ca_Kabuli_Chr03</i>       | 38848358                       | (C/T)       |
| 4956        | CakSNP4956     | <i>Kabuli</i>    | <i>Ca_Kabuli_Chr03</i>       | 38848412                       | (C/G)       |
| 4957        | CakSNP4957     | <i>Kabuli</i>    | <i>Ca_Kabuli_Chr03</i>       | 38878577                       | (C/G)       |
| 4958        | CakSNP4958     | <i>Kabuli</i>    | <i>Ca_Kabuli_Chr03</i>       | 38878664                       | (G/C)       |
| 4959        | CakSNP4959     | <i>Kabuli</i>    | <i>Ca_Kabuli_Chr03</i>       | 38878649                       | (T/C)       |
| 4960        | CakSNP4960     | <i>Kabuli</i>    | <i>Ca_Kabuli_Chr03</i>       | 38878736                       | (G/C)       |
| 4961        | CakSNP4961     | <i>Kabuli</i>    | <i>Ca_Kabuli_Chr03</i>       | 38887640                       | (C/T)       |
| 4962        | CakSNP4962     | <i>Kabuli</i>    | <i>Ca_Kabuli_Chr03</i>       | 38891567                       | (T/C)       |
| 4963        | CakSNP4963     | <i>Kabuli</i>    | <i>Ca_Kabuli_Chr03</i>       | 38896013                       | (A/G)       |
| 4964        | CakSNP4964     | <i>Kabuli</i>    | <i>Ca_Kabuli_Chr03</i>       | 38913449                       | (T/C)       |
| 4965        | CakSNP4965     | <i>Kabuli</i>    | <i>Ca_Kabuli_Chr03</i>       | 38914528                       | (A/G)       |
| 4966        | CakSNP4966     | <i>Kabuli</i>    | <i>Ca_Kabuli_Chr03</i>       | 38923321                       | (C/T)       |
| 4967        | CakSNP4967     | <i>Kabuli</i>    | <i>Ca_Kabuli_Chr03</i>       | 38951428                       | (G/A)       |
| 4968        | CakSNP4968     | <i>Kabuli</i>    | <i>Ca_Kabuli_Chr03</i>       | 38951698                       | (A/C)       |
| 4969        | CakSNP4969     | <i>Kabuli</i>    | <i>Ca_Kabuli_Chr03</i>       | 38965610                       | (T/A)       |
| 4970        | CakSNP4970     | <i>Kabuli</i>    | <i>Ca_Kabuli_Chr03</i>       | 38982481                       | (A/G)       |
| 4971        | CakSNP4971     | <i>Kabuli</i>    | <i>Ca_Kabuli_Chr03</i>       | 38987810                       | (G/A)       |
| 4972        | CakSNP4972     | <i>Kabuli</i>    | <i>Ca_Kabuli_Chr03</i>       | 38987916                       | (A/C)       |
| 4973        | CakSNP4973     | <i>Kabuli</i>    | <i>Ca_Kabuli_Chr03</i>       | 39003771                       | (G/A)       |
| 4974        | CakSNP4974     | <i>Kabuli</i>    | <i>Ca_Kabuli_Chr03</i>       | 39013988                       | (T/G)       |
| 4975        | CakSNP4975     | <i>Kabuli</i>    | <i>Ca_Kabuli_Chr03</i>       | 39029251                       | (A/C)       |
| 4976        | CakSNP4976     | <i>Kabuli</i>    | <i>Ca_Kabuli_Chr03</i>       | 39034246                       | (C/T)       |
| 4977        | CakSNP4977     | <i>Kabuli</i>    | <i>Ca_Kabuli_Chr03</i>       | 39034433                       | (A/G)       |
| 4978        | CakSNP4978     | <i>Kabuli</i>    | <i>Ca_Kabuli_Chr03</i>       | 39036130                       | (T/C)       |
| 4979        | CakSNP4979     | <i>Kabuli</i>    | <i>Ca_Kabuli_Chr03</i>       | 39052024                       | (T/C)       |
| 4980        | CakSNP4980     | <i>Kabuli</i>    | <i>Ca_Kabuli_Chr03</i>       | 39055529                       | (C/T)       |
| 4981        | CakSNP4981     | <i>Kabuli</i>    | <i>Ca_Kabuli_Chr03</i>       | 39055455                       | (T/C)       |
| 4982        | CakSNP4982     | <i>Kabuli</i>    | <i>Ca_Kabuli_Chr03</i>       | 39081040                       | (A/G)       |
| 4983        | CakSNP4983     | <i>Kabuli</i>    | <i>Ca_Kabuli_Chr03</i>       | 39084916                       | (T/A)       |
| 4984        | CakSNP4984     | <i>Kabuli</i>    | <i>Ca_Kabuli_Chr03</i>       | 39084979                       | (A/C)       |
| 4985        | CakSNP4985     | <i>Kabuli</i>    | <i>Ca_Kabuli_Chr03</i>       | 39093242                       | (G/A)       |
| 4986        | CakSNP4986     | <i>Kabuli</i>    | <i>Ca_Kabuli_Chr03</i>       | 39093243                       | (C/A)       |
| 4987        | CakSNP4987     | <i>Kabuli</i>    | <i>Ca_Kabuli_Chr03</i>       | 39093245                       | (T/A)       |
| 4988        | CakSNP4988     | <i>Kabuli</i>    | <i>Ca_Kabuli_Chr03</i>       | 39093215                       | (G/A)       |
| 4989        | CakSNP4989     | <i>Kabuli</i>    | <i>Ca_Kabuli_Chr03</i>       | 39115274                       | (A/C)       |
| 4990        | CakSNP4990     | <i>Kabuli</i>    | <i>Ca_Kabuli_Chr03</i>       | 39115986                       | (C/G)       |

| <b>S.N.</b> | <b>SNP IDs</b> | <b>Cultivars</b> | <b>Chromosomes/scaffolds</b> | <b>Physical positions (bp)</b> | <b>SNPs</b> |
|-------------|----------------|------------------|------------------------------|--------------------------------|-------------|
| 4991        | CakSNP4991     | <i>Kabuli</i>    | <i>Ca_Kabuli_Chr03</i>       | 39115979                       | (A/G)       |
| 4992        | CakSNP4992     | <i>Kabuli</i>    | <i>Ca_Kabuli_Chr03</i>       | 39115972                       | (T/A)       |
| 4993        | CakSNP4993     | <i>Kabuli</i>    | <i>Ca_Kabuli_Chr03</i>       | 39115970                       | (T/G)       |
| 4994        | CakSNP4994     | <i>Kabuli</i>    | <i>Ca_Kabuli_Chr03</i>       | 39118510                       | (C/T)       |
| 4995        | CakSNP4995     | <i>Kabuli</i>    | <i>Ca_Kabuli_Chr03</i>       | 39200823                       | (C/A)       |
| 4996        | CakSNP4996     | <i>Kabuli</i>    | <i>Ca_Kabuli_Chr03</i>       | 39200847                       | (A/C)       |
| 4997        | CakSNP4997     | <i>Kabuli</i>    | <i>Ca_Kabuli_Chr03</i>       | 39202479                       | (G/C)       |
| 4998        | CakSNP4998     | <i>Kabuli</i>    | <i>Ca_Kabuli_Chr03</i>       | 39202481                       | (A/T)       |
| 4999        | CakSNP4999     | <i>Kabuli</i>    | <i>Ca_Kabuli_Chr03</i>       | 39207112                       | (A/C)       |
| 5000        | CakSNP5000     | <i>Kabuli</i>    | <i>Ca_Kabuli_Chr03</i>       | 39215327                       | (C/T)       |
| 5001        | CakSNP5001     | <i>Kabuli</i>    | <i>Ca_Kabuli_Chr03</i>       | 39215476                       | (G/A)       |
| 5002        | CakSNP5002     | <i>Kabuli</i>    | <i>Ca_Kabuli_Chr03</i>       | 39215558                       | (C/T)       |
| 5003        | CakSNP5003     | <i>Kabuli</i>    | <i>Ca_Kabuli_Chr03</i>       | 39233774                       | (A/T)       |
| 5004        | CakSNP5004     | <i>Kabuli</i>    | <i>Ca_Kabuli_Chr03</i>       | 39233852                       | (A/C)       |
| 5005        | CakSNP5005     | <i>Kabuli</i>    | <i>Ca_Kabuli_Chr03</i>       | 39233885                       | (A/T)       |
| 5006        | CakSNP5006     | <i>Kabuli</i>    | <i>Ca_Kabuli_Chr03</i>       | 39234161                       | (A/G)       |
| 5007        | CakSNP5007     | <i>Kabuli</i>    | <i>Ca_Kabuli_Chr03</i>       | 39254527                       | (T/G)       |
| 5008        | CakSNP5008     | <i>Kabuli</i>    | <i>Ca_Kabuli_Chr03</i>       | 39254532                       | (C/G)       |
| 5009        | CakSNP5009     | <i>Kabuli</i>    | <i>Ca_Kabuli_Chr03</i>       | 39255721                       | (A/C)       |
| 5010        | CakSNP5010     | <i>Kabuli</i>    | <i>Ca_Kabuli_Chr03</i>       | 39255715                       | (G/A)       |
| 5011        | CakSNP5011     | <i>Kabuli</i>    | <i>Ca_Kabuli_Chr03</i>       | 39255713                       | (C/A)       |
| 5012        | CakSNP5012     | <i>Kabuli</i>    | <i>Ca_Kabuli_Chr03</i>       | 39255709                       | (A/T)       |
| 5013        | CakSNP5013     | <i>Kabuli</i>    | <i>Ca_Kabuli_Chr03</i>       | 39255729                       | (C/T)       |
| 5014        | CakSNP5014     | <i>Kabuli</i>    | <i>Ca_Kabuli_Chr03</i>       | 39255792                       | (C/T)       |
| 5015        | CakSNP5015     | <i>Kabuli</i>    | <i>Ca_Kabuli_Chr03</i>       | 39257226                       | (A/G)       |
| 5016        | CakSNP5016     | <i>Kabuli</i>    | <i>Ca_Kabuli_Chr03</i>       | 39258671                       | (A/C)       |
| 5017        | CakSNP5017     | <i>Kabuli</i>    | <i>Ca_Kabuli_Chr03</i>       | 39265412                       | (A/C)       |
| 5018        | CakSNP5018     | <i>Kabuli</i>    | <i>Ca_Kabuli_Chr03</i>       | 39289840                       | (T/A)       |
| 5019        | CakSNP5019     | <i>Kabuli</i>    | <i>Ca_Kabuli_Chr03</i>       | 39303386                       | (C/G)       |
| 5020        | CakSNP5020     | <i>Kabuli</i>    | <i>Ca_Kabuli_Chr03</i>       | 39303416                       | (G/T)       |
| 5021        | CakSNP5021     | <i>Kabuli</i>    | <i>Ca_Kabuli_Chr03</i>       | 39303407                       | (C/A)       |
| 5022        | CakSNP5022     | <i>Kabuli</i>    | <i>Ca_Kabuli_Chr03</i>       | 39323779                       | (A/G)       |
| 5023        | CakSNP5023     | <i>Kabuli</i>    | <i>Ca_Kabuli_Chr03</i>       | 39326387                       | (C/T)       |
| 5024        | CakSNP5024     | <i>Kabuli</i>    | <i>Ca_Kabuli_Chr03</i>       | 39405252                       | (C/A)       |
| 5025        | CakSNP5025     | <i>Kabuli</i>    | <i>Ca_Kabuli_Chr03</i>       | 39405873                       | (C/G)       |
| 5026        | CakSNP5026     | <i>Kabuli</i>    | <i>Ca_Kabuli_Chr03</i>       | 39472291                       | (G/C)       |
| 5027        | CakSNP5027     | <i>Kabuli</i>    | <i>Ca_Kabuli_Chr03</i>       | 39481371                       | (A/C)       |
| 5028        | CakSNP5028     | <i>Kabuli</i>    | <i>Ca_Kabuli_Chr03</i>       | 39485182                       | (G/A)       |
| 5029        | CakSNP5029     | <i>Kabuli</i>    | <i>Ca_Kabuli_Chr03</i>       | 39504242                       | (A/G)       |

| <b>S.N.</b> | <b>SNP IDs</b> | <b>Cultivars</b> | <b>Chromosomes/scaffolds</b> | <b>Physical positions (bp)</b> | <b>SNPs</b> |
|-------------|----------------|------------------|------------------------------|--------------------------------|-------------|
| 5030        | CakSNP5030     | <i>Kabuli</i>    | <i>Ca_Kabuli_Chr03</i>       | 39515531                       | (A/G)       |
| 5031        | CakSNP5031     | <i>Kabuli</i>    | <i>Ca_Kabuli_Chr03</i>       | 39515710                       | (T/A)       |
| 5032        | CakSNP5032     | <i>Kabuli</i>    | <i>Ca_Kabuli_Chr03</i>       | 39519640                       | (A/G)       |
| 5033        | CakSNP5033     | <i>Kabuli</i>    | <i>Ca_Kabuli_Chr03</i>       | 39556535                       | (T/A)       |
| 5034        | CakSNP5034     | <i>Kabuli</i>    | <i>Ca_Kabuli_Chr03</i>       | 39587620                       | (T/G)       |
| 5035        | CakSNP5035     | <i>Kabuli</i>    | <i>Ca_Kabuli_Chr03</i>       | 39592340                       | (C/T)       |
| 5036        | CakSNP5036     | <i>Kabuli</i>    | <i>Ca_Kabuli_Chr03</i>       | 39612466                       | (T/C)       |
| 5037        | CakSNP5037     | <i>Kabuli</i>    | <i>Ca_Kabuli_Chr03</i>       | 39612458                       | (C/A)       |
| 5038        | CakSNP5038     | <i>Kabuli</i>    | <i>Ca_Kabuli_Chr03</i>       | 39612447                       | (C/A)       |
| 5039        | CakSNP5039     | <i>Kabuli</i>    | <i>Ca_Kabuli_Chr03</i>       | 39612568                       | (A/T)       |
| 5040        | CakSNP5040     | <i>Kabuli</i>    | <i>Ca_Kabuli_Chr03</i>       | 39628916                       | (G/A)       |
| 5041        | CakSNP5041     | <i>Kabuli</i>    | <i>Ca_Kabuli_Chr03</i>       | 39698060                       | (T/C)       |
| 5042        | CakSNP5042     | <i>Kabuli</i>    | <i>Ca_Kabuli_Chr03</i>       | 39701532                       | (G/A)       |
| 5043        | CakSNP5043     | <i>Kabuli</i>    | <i>Ca_Kabuli_Chr03</i>       | 39722314                       | (C/T)       |
| 5044        | CakSNP5044     | <i>Kabuli</i>    | <i>Ca_Kabuli_Chr03</i>       | 39731437                       | (A/C)       |
| 5045        | CakSNP5045     | <i>Kabuli</i>    | <i>Ca_Kabuli_Chr03</i>       | 39787513                       | (A/C)       |
| 5046        | CakSNP5046     | <i>Kabuli</i>    | <i>Ca_Kabuli_Chr03</i>       | 39787615                       | (C/T)       |
| 5047        | CakSNP5047     | <i>Kabuli</i>    | <i>Ca_Kabuli_Chr03</i>       | 39787716                       | (A/C)       |
| 5048        | CakSNP5048     | <i>Kabuli</i>    | <i>Ca_Kabuli_Chr03</i>       | 39791717                       | (C/T)       |
| 5049        | CakSNP5049     | <i>Kabuli</i>    | <i>Ca_Kabuli_Chr03</i>       | 39793539                       | (G/A)       |
| 5050        | CakSNP5050     | <i>Kabuli</i>    | <i>Ca_Kabuli_Chr03</i>       | 39794672                       | (C/T)       |
| 5051        | CakSNP5051     | <i>Kabuli</i>    | <i>Ca_Kabuli_Chr03</i>       | 39794639                       | (C/G)       |
| 5052        | CakSNP5052     | <i>Kabuli</i>    | <i>Ca_Kabuli_Chr03</i>       | 39801213                       | (A/G)       |
| 5053        | CakSNP5053     | <i>Kabuli</i>    | <i>Ca_Kabuli_Chr03</i>       | 39801242                       | (C/T)       |
| 5054        | CakSNP5054     | <i>Kabuli</i>    | <i>Ca_Kabuli_Chr03</i>       | 39817122                       | (G/A)       |
| 5055        | CakSNP5055     | <i>Kabuli</i>    | <i>Ca_Kabuli_Chr03</i>       | 39839763                       | (T/G)       |
| 5056        | CakSNP5056     | <i>Kabuli</i>    | <i>Ca_Kabuli_Chr03</i>       | 39891075                       | (G/A)       |
| 5057        | CakSNP5057     | <i>Kabuli</i>    | <i>Ca_Kabuli_Chr03</i>       | 39890991                       | (A/T)       |
| 5058        | CakSNP5058     | <i>Kabuli</i>    | <i>Ca_Kabuli_Chr03</i>       | 39896395                       | (A/G)       |
| 5059        | CakSNP5059     | <i>Kabuli</i>    | <i>Ca_Kabuli_Chr03</i>       | 39908983                       | (C/G)       |
| 5060        | CakSNP5060     | <i>Kabuli</i>    | <i>Ca_Kabuli_Chr03</i>       | 39909824                       | (C/G)       |
| 5061        | CakSNP5061     | <i>Kabuli</i>    | <i>Ca_Kabuli_Chr03</i>       | 39909839                       | (T/C)       |
| 5062        | CakSNP5062     | <i>Kabuli</i>    | <i>Ca_Kabuli_Chr03</i>       | 39914344                       | (T/G)       |
| 5063        | CakSNP5063     | <i>Kabuli</i>    | <i>Ca_Kabuli_Chr03</i>       | 39941101                       | (T/G)       |
| 5064        | CakSNP5064     | <i>Kabuli</i>    | <i>Ca_Kabuli_Chr03</i>       | 39941090                       | (G/A)       |
| 5065        | CakSNP5065     | <i>Kabuli</i>    | <i>Ca_Kabuli_Chr04</i>       | 20297                          | (A/G)       |
| 5066        | CakSNP5066     | <i>Kabuli</i>    | <i>Ca_Kabuli_Chr04</i>       | 20495                          | (G/C)       |
| 5067        | CakSNP5067     | <i>Kabuli</i>    | <i>Ca_Kabuli_Chr04</i>       | 167229                         | (T/G)       |
| 5068        | CakSNP5068     | <i>Kabuli</i>    | <i>Ca_Kabuli_Chr04</i>       | 228864                         | (G/A)       |

| <b>S.N.</b> | <b>SNP IDs</b> | <b>Cultivars</b> | <b>Chromosomes/scaffolds</b> | <b>Physical positions (bp)</b> | <b>SNPs</b> |
|-------------|----------------|------------------|------------------------------|--------------------------------|-------------|
| 5069        | CakSNP5069     | <i>Kabuli</i>    | <i>Ca_Kabuli_Chr04</i>       | 305558                         | (C/T)       |
| 5070        | CakSNP5070     | <i>Kabuli</i>    | <i>Ca_Kabuli_Chr04</i>       | 335941                         | (C/T)       |
| 5071        | CakSNP5071     | <i>Kabuli</i>    | <i>Ca_Kabuli_Chr04</i>       | 336055                         | (G/A)       |
| 5072        | CakSNP5072     | <i>Kabuli</i>    | <i>Ca_Kabuli_Chr04</i>       | 336050                         | (T/C)       |
| 5073        | CakSNP5073     | <i>Kabuli</i>    | <i>Ca_Kabuli_Chr04</i>       | 336029                         | (G/A)       |
| 5074        | CakSNP5074     | <i>Kabuli</i>    | <i>Ca_Kabuli_Chr04</i>       | 338641                         | (A/G)       |
| 5075        | CakSNP5075     | <i>Kabuli</i>    | <i>Ca_Kabuli_Chr04</i>       | 338721                         | (C/T)       |
| 5076        | CakSNP5076     | <i>Kabuli</i>    | <i>Ca_Kabuli_Chr04</i>       | 338707                         | (G/T)       |
| 5077        | CakSNP5077     | <i>Kabuli</i>    | <i>Ca_Kabuli_Chr04</i>       | 349309                         | (C/T)       |
| 5078        | CakSNP5078     | <i>Kabuli</i>    | <i>Ca_Kabuli_Chr04</i>       | 353069                         | (C/A)       |
| 5079        | CakSNP5079     | <i>Kabuli</i>    | <i>Ca_Kabuli_Chr04</i>       | 353079                         | (C/T)       |
| 5080        | CakSNP5080     | <i>Kabuli</i>    | <i>Ca_Kabuli_Chr04</i>       | 353119                         | (G/A)       |
| 5081        | CakSNP5081     | <i>Kabuli</i>    | <i>Ca_Kabuli_Chr04</i>       | 353120                         | (C/G)       |
| 5082        | CakSNP5082     | <i>Kabuli</i>    | <i>Ca_Kabuli_Chr04</i>       | 353124                         | (A/G)       |
| 5083        | CakSNP5083     | <i>Kabuli</i>    | <i>Ca_Kabuli_Chr04</i>       | 353126                         | (T/G)       |
| 5084        | CakSNP5084     | <i>Kabuli</i>    | <i>Ca_Kabuli_Chr04</i>       | 369258                         | (C/T)       |
| 5085        | CakSNP5085     | <i>Kabuli</i>    | <i>Ca_Kabuli_Chr04</i>       | 394661                         | (C/G)       |
| 5086        | CakSNP5086     | <i>Kabuli</i>    | <i>Ca_Kabuli_Chr04</i>       | 411208                         | (A/C)       |
| 5087        | CakSNP5087     | <i>Kabuli</i>    | <i>Ca_Kabuli_Chr04</i>       | 412017                         | (C/A)       |
| 5088        | CakSNP5088     | <i>Kabuli</i>    | <i>Ca_Kabuli_Chr04</i>       | 455361                         | (A/G)       |
| 5089        | CakSNP5089     | <i>Kabuli</i>    | <i>Ca_Kabuli_Chr04</i>       | 459360                         | (T/C)       |
| 5090        | CakSNP5090     | <i>Kabuli</i>    | <i>Ca_Kabuli_Chr04</i>       | 480138                         | (C/A)       |
| 5091        | CakSNP5091     | <i>Kabuli</i>    | <i>Ca_Kabuli_Chr04</i>       | 481556                         | (A/G)       |
| 5092        | CakSNP5092     | <i>Kabuli</i>    | <i>Ca_Kabuli_Chr04</i>       | 481687                         | (T/G)       |
| 5093        | CakSNP5093     | <i>Kabuli</i>    | <i>Ca_Kabuli_Chr04</i>       | 504928                         | (C/A)       |
| 5094        | CakSNP5094     | <i>Kabuli</i>    | <i>Ca_Kabuli_Chr04</i>       | 586273                         | (A/G)       |
| 5095        | CakSNP5095     | <i>Kabuli</i>    | <i>Ca_Kabuli_Chr04</i>       | 586703                         | (T/C)       |
| 5096        | CakSNP5096     | <i>Kabuli</i>    | <i>Ca_Kabuli_Chr04</i>       | 589140                         | (T/C)       |
| 5097        | CakSNP5097     | <i>Kabuli</i>    | <i>Ca_Kabuli_Chr04</i>       | 589191                         | (A/G)       |
| 5098        | CakSNP5098     | <i>Kabuli</i>    | <i>Ca_Kabuli_Chr04</i>       | 589204                         | (G/A)       |
| 5099        | CakSNP5099     | <i>Kabuli</i>    | <i>Ca_Kabuli_Chr04</i>       | 589220                         | (A/C)       |
| 5100        | CakSNP5100     | <i>Kabuli</i>    | <i>Ca_Kabuli_Chr04</i>       | 589224                         | (T/C)       |
| 5101        | CakSNP5101     | <i>Kabuli</i>    | <i>Ca_Kabuli_Chr04</i>       | 595982                         | (C/G)       |
| 5102        | CakSNP5102     | <i>Kabuli</i>    | <i>Ca_Kabuli_Chr04</i>       | 613150                         | (G/A)       |
| 5103        | CakSNP5103     | <i>Kabuli</i>    | <i>Ca_Kabuli_Chr04</i>       | 613166                         | (A/G)       |
| 5104        | CakSNP5104     | <i>Kabuli</i>    | <i>Ca_Kabuli_Chr04</i>       | 645103                         | (T/A)       |
| 5105        | CakSNP5105     | <i>Kabuli</i>    | <i>Ca_Kabuli_Chr04</i>       | 645075                         | (T/A)       |
| 5106        | CakSNP5106     | <i>Kabuli</i>    | <i>Ca_Kabuli_Chr04</i>       | 646567                         | (C/T)       |
| 5107        | CakSNP5107     | <i>Kabuli</i>    | <i>Ca_Kabuli_Chr04</i>       | 646576                         | (A/G)       |

| <b>S.N.</b> | <b>SNP IDs</b> | <b>Cultivars</b> | <b>Chromosomes/scaffolds</b> | <b>Physical positions (bp)</b> | <b>SNPs</b> |
|-------------|----------------|------------------|------------------------------|--------------------------------|-------------|
| 5108        | CakSNP5108     | <i>Kabuli</i>    | <i>Ca_Kabuli_Chr04</i>       | 651040                         | (C/T)       |
| 5109        | CakSNP5109     | <i>Kabuli</i>    | <i>Ca_Kabuli_Chr04</i>       | 660034                         | (A/C)       |
| 5110        | CakSNP5110     | <i>Kabuli</i>    | <i>Ca_Kabuli_Chr04</i>       | 660029                         | (T/G)       |
| 5111        | CakSNP5111     | <i>Kabuli</i>    | <i>Ca_Kabuli_Chr04</i>       | 703978                         | (A/T)       |
| 5112        | CakSNP5112     | <i>Kabuli</i>    | <i>Ca_Kabuli_Chr04</i>       | 703975                         | (G/T)       |
| 5113        | CakSNP5113     | <i>Kabuli</i>    | <i>Ca_Kabuli_Chr04</i>       | 704009                         | (G/A)       |
| 5114        | CakSNP5114     | <i>Kabuli</i>    | <i>Ca_Kabuli_Chr04</i>       | 705336                         | (T/G)       |
| 5115        | CakSNP5115     | <i>Kabuli</i>    | <i>Ca_Kabuli_Chr04</i>       | 783302                         | (C/T)       |
| 5116        | CakSNP5116     | <i>Kabuli</i>    | <i>Ca_Kabuli_Chr04</i>       | 783382                         | (G/T)       |
| 5117        | CakSNP5117     | <i>Kabuli</i>    | <i>Ca_Kabuli_Chr04</i>       | 827630                         | (T/C)       |
| 5118        | CakSNP5118     | <i>Kabuli</i>    | <i>Ca_Kabuli_Chr04</i>       | 848192                         | (G/A)       |
| 5119        | CakSNP5119     | <i>Kabuli</i>    | <i>Ca_Kabuli_Chr04</i>       | 913689                         | (A/G)       |
| 5120        | CakSNP5120     | <i>Kabuli</i>    | <i>Ca_Kabuli_Chr04</i>       | 951389                         | (T/G)       |
| 5121        | CakSNP5121     | <i>Kabuli</i>    | <i>Ca_Kabuli_Chr04</i>       | 951390                         | (G/A)       |
| 5122        | CakSNP5122     | <i>Kabuli</i>    | <i>Ca_Kabuli_Chr04</i>       | 1035328                        | (G/C)       |
| 5123        | CakSNP5123     | <i>Kabuli</i>    | <i>Ca_Kabuli_Chr04</i>       | 1047639                        | (G/T)       |
| 5124        | CakSNP5124     | <i>Kabuli</i>    | <i>Ca_Kabuli_Chr04</i>       | 1065107                        | (C/T)       |
| 5125        | CakSNP5125     | <i>Kabuli</i>    | <i>Ca_Kabuli_Chr04</i>       | 1065245                        | (A/G)       |
| 5126        | CakSNP5126     | <i>Kabuli</i>    | <i>Ca_Kabuli_Chr04</i>       | 1189997                        | (C/T)       |
| 5127        | CakSNP5127     | <i>Kabuli</i>    | <i>Ca_Kabuli_Chr04</i>       | 1190007                        | (C/G)       |
| 5128        | CakSNP5128     | <i>Kabuli</i>    | <i>Ca_Kabuli_Chr04</i>       | 1190038                        | (G/T)       |
| 5129        | CakSNP5129     | <i>Kabuli</i>    | <i>Ca_Kabuli_Chr04</i>       | 1190208                        | (T/C)       |
| 5130        | CakSNP5130     | <i>Kabuli</i>    | <i>Ca_Kabuli_Chr04</i>       | 1190184                        | (A/C)       |
| 5131        | CakSNP5131     | <i>Kabuli</i>    | <i>Ca_Kabuli_Chr04</i>       | 1190158                        | (T/G)       |
| 5132        | CakSNP5132     | <i>Kabuli</i>    | <i>Ca_Kabuli_Chr04</i>       | 1259917                        | (G/T)       |
| 5133        | CakSNP5133     | <i>Kabuli</i>    | <i>Ca_Kabuli_Chr04</i>       | 1259915                        | (T/G)       |
| 5134        | CakSNP5134     | <i>Kabuli</i>    | <i>Ca_Kabuli_Chr04</i>       | 1264361                        | (T/C)       |
| 5135        | CakSNP5135     | <i>Kabuli</i>    | <i>Ca_Kabuli_Chr04</i>       | 1266175                        | (A/G)       |
| 5136        | CakSNP5136     | <i>Kabuli</i>    | <i>Ca_Kabuli_Chr04</i>       | 1266174                        | (C/T)       |
| 5137        | CakSNP5137     | <i>Kabuli</i>    | <i>Ca_Kabuli_Chr04</i>       | 1283369                        | (A/G)       |
| 5138        | CakSNP5138     | <i>Kabuli</i>    | <i>Ca_Kabuli_Chr04</i>       | 1344151                        | (T/C)       |
| 5139        | CakSNP5139     | <i>Kabuli</i>    | <i>Ca_Kabuli_Chr04</i>       | 1396281                        | (G/C)       |
| 5140        | CakSNP5140     | <i>Kabuli</i>    | <i>Ca_Kabuli_Chr04</i>       | 1396425                        | (C/A)       |
| 5141        | CakSNP5141     | <i>Kabuli</i>    | <i>Ca_Kabuli_Chr04</i>       | 1474771                        | (T/C)       |
| 5142        | CakSNP5142     | <i>Kabuli</i>    | <i>Ca_Kabuli_Chr04</i>       | 1474898                        | (A/G)       |
| 5143        | CakSNP5143     | <i>Kabuli</i>    | <i>Ca_Kabuli_Chr04</i>       | 1474922                        | (G/T)       |
| 5144        | CakSNP5144     | <i>Kabuli</i>    | <i>Ca_Kabuli_Chr04</i>       | 1493927                        | (T/C)       |
| 5145        | CakSNP5145     | <i>Kabuli</i>    | <i>Ca_Kabuli_Chr04</i>       | 1513664                        | (T/A)       |
| 5146        | CakSNP5146     | <i>Kabuli</i>    | <i>Ca_Kabuli_Chr04</i>       | 1526270                        | (T/C)       |

| <b>S.N.</b> | <b>SNP IDs</b> | <b>Cultivars</b> | <b>Chromosomes/scaffolds</b> | <b>Physical positions (bp)</b> | <b>SNPs</b> |
|-------------|----------------|------------------|------------------------------|--------------------------------|-------------|
| 5147        | CakSNP5147     | <i>Kabuli</i>    | <i>Ca_Kabuli_Chr04</i>       | 1526731                        | (T/G)       |
| 5148        | CakSNP5148     | <i>Kabuli</i>    | <i>Ca_Kabuli_Chr04</i>       | 1613153                        | (G/A)       |
| 5149        | CakSNP5149     | <i>Kabuli</i>    | <i>Ca_Kabuli_Chr04</i>       | 1613193                        | (G/A)       |
| 5150        | CakSNP5150     | <i>Kabuli</i>    | <i>Ca_Kabuli_Chr04</i>       | 1613303                        | (G/A)       |
| 5151        | CakSNP5151     | <i>Kabuli</i>    | <i>Ca_Kabuli_Chr04</i>       | 1687346                        | (A/G)       |
| 5152        | CakSNP5152     | <i>Kabuli</i>    | <i>Ca_Kabuli_Chr04</i>       | 1691555                        | (T/G)       |
| 5153        | CakSNP5153     | <i>Kabuli</i>    | <i>Ca_Kabuli_Chr04</i>       | 1708370                        | (C/T)       |
| 5154        | CakSNP5154     | <i>Kabuli</i>    | <i>Ca_Kabuli_Chr04</i>       | 1711864                        | (A/C)       |
| 5155        | CakSNP5155     | <i>Kabuli</i>    | <i>Ca_Kabuli_Chr04</i>       | 1711865                        | (G/A)       |
| 5156        | CakSNP5156     | <i>Kabuli</i>    | <i>Ca_Kabuli_Chr04</i>       | 1720544                        | (A/C)       |
| 5157        | CakSNP5157     | <i>Kabuli</i>    | <i>Ca_Kabuli_Chr04</i>       | 1720658                        | (A/G)       |
| 5158        | CakSNP5158     | <i>Kabuli</i>    | <i>Ca_Kabuli_Chr04</i>       | 1720642                        | (A/G)       |
| 5159        | CakSNP5159     | <i>Kabuli</i>    | <i>Ca_Kabuli_Chr04</i>       | 1720619                        | (A/C)       |
| 5160        | CakSNP5160     | <i>Kabuli</i>    | <i>Ca_Kabuli_Chr04</i>       | 1742468                        | (C/T)       |
| 5161        | CakSNP5161     | <i>Kabuli</i>    | <i>Ca_Kabuli_Chr04</i>       | 1747181                        | (A/T)       |
| 5162        | CakSNP5162     | <i>Kabuli</i>    | <i>Ca_Kabuli_Chr04</i>       | 1754555                        | (C/T)       |
| 5163        | CakSNP5163     | <i>Kabuli</i>    | <i>Ca_Kabuli_Chr04</i>       | 1755066                        | (G/C)       |
| 5164        | CakSNP5164     | <i>Kabuli</i>    | <i>Ca_Kabuli_Chr04</i>       | 1773886                        | (C/G)       |
| 5165        | CakSNP5165     | <i>Kabuli</i>    | <i>Ca_Kabuli_Chr04</i>       | 1773939                        | (C/T)       |
| 5166        | CakSNP5166     | <i>Kabuli</i>    | <i>Ca_Kabuli_Chr04</i>       | 1773951                        | (C/G)       |
| 5167        | CakSNP5167     | <i>Kabuli</i>    | <i>Ca_Kabuli_Chr04</i>       | 1785705                        | (G/C)       |
| 5168        | CakSNP5168     | <i>Kabuli</i>    | <i>Ca_Kabuli_Chr04</i>       | 1785680                        | (C/T)       |
| 5169        | CakSNP5169     | <i>Kabuli</i>    | <i>Ca_Kabuli_Chr04</i>       | 1807484                        | (G/A)       |
| 5170        | CakSNP5170     | <i>Kabuli</i>    | <i>Ca_Kabuli_Chr04</i>       | 1817779                        | (G/C)       |
| 5171        | CakSNP5171     | <i>Kabuli</i>    | <i>Ca_Kabuli_Chr04</i>       | 1833570                        | (T/C)       |
| 5172        | CakSNP5172     | <i>Kabuli</i>    | <i>Ca_Kabuli_Chr04</i>       | 1833678                        | (A/G)       |
| 5173        | CakSNP5173     | <i>Kabuli</i>    | <i>Ca_Kabuli_Chr04</i>       | 1833725                        | (C/T)       |
| 5174        | CakSNP5174     | <i>Kabuli</i>    | <i>Ca_Kabuli_Chr04</i>       | 1845301                        | (G/A)       |
| 5175        | CakSNP5175     | <i>Kabuli</i>    | <i>Ca_Kabuli_Chr04</i>       | 1867921                        | (G/A)       |
| 5176        | CakSNP5176     | <i>Kabuli</i>    | <i>Ca_Kabuli_Chr04</i>       | 1869577                        | (C/T)       |
| 5177        | CakSNP5177     | <i>Kabuli</i>    | <i>Ca_Kabuli_Chr04</i>       | 1870333                        | (A/G)       |
| 5178        | CakSNP5178     | <i>Kabuli</i>    | <i>Ca_Kabuli_Chr04</i>       | 1870317                        | (T/C)       |
| 5179        | CakSNP5179     | <i>Kabuli</i>    | <i>Ca_Kabuli_Chr04</i>       | 1870666                        | (G/C)       |
| 5180        | CakSNP5180     | <i>Kabuli</i>    | <i>Ca_Kabuli_Chr04</i>       | 1870806                        | (C/A)       |
| 5181        | CakSNP5181     | <i>Kabuli</i>    | <i>Ca_Kabuli_Chr04</i>       | 1870802                        | (C/T)       |
| 5182        | CakSNP5182     | <i>Kabuli</i>    | <i>Ca_Kabuli_Chr04</i>       | 1873733                        | (T/C)       |
| 5183        | CakSNP5183     | <i>Kabuli</i>    | <i>Ca_Kabuli_Chr04</i>       | 1890220                        | (G/C)       |
| 5184        | CakSNP5184     | <i>Kabuli</i>    | <i>Ca_Kabuli_Chr04</i>       | 1941001                        | (T/G)       |
| 5185        | CakSNP5185     | <i>Kabuli</i>    | <i>Ca_Kabuli_Chr04</i>       | 1941089                        | (C/T)       |

| <b>S.N.</b> | <b>SNP IDs</b> | <b>Cultivars</b> | <b>Chromosomes/scaffolds</b> | <b>Physical positions (bp)</b> | <b>SNPs</b> |
|-------------|----------------|------------------|------------------------------|--------------------------------|-------------|
| 5186        | CakSNP5186     | <i>Kabuli</i>    | <i>Ca_Kabuli_Chr04</i>       | 1970471                        | (A/C)       |
| 5187        | CakSNP5187     | <i>Kabuli</i>    | <i>Ca_Kabuli_Chr04</i>       | 1973375                        | (A/C)       |
| 5188        | CakSNP5188     | <i>Kabuli</i>    | <i>Ca_Kabuli_Chr04</i>       | 2009707                        | (A/G)       |
| 5189        | CakSNP5189     | <i>Kabuli</i>    | <i>Ca_Kabuli_Chr04</i>       | 2025214                        | (A/C)       |
| 5190        | CakSNP5190     | <i>Kabuli</i>    | <i>Ca_Kabuli_Chr04</i>       | 2027063                        | (G/A)       |
| 5191        | CakSNP5191     | <i>Kabuli</i>    | <i>Ca_Kabuli_Chr04</i>       | 2027101                        | (T/A)       |
| 5192        | CakSNP5192     | <i>Kabuli</i>    | <i>Ca_Kabuli_Chr04</i>       | 2034429                        | (C/A)       |
| 5193        | CakSNP5193     | <i>Kabuli</i>    | <i>Ca_Kabuli_Chr04</i>       | 2034398                        | (C/T)       |
| 5194        | CakSNP5194     | <i>Kabuli</i>    | <i>Ca_Kabuli_Chr04</i>       | 2034396                        | (A/G)       |
| 5195        | CakSNP5195     | <i>Kabuli</i>    | <i>Ca_Kabuli_Chr04</i>       | 2034739                        | (A/C)       |
| 5196        | CakSNP5196     | <i>Kabuli</i>    | <i>Ca_Kabuli_Chr04</i>       | 2035797                        | (G/A)       |
| 5197        | CakSNP5197     | <i>Kabuli</i>    | <i>Ca_Kabuli_Chr04</i>       | 2035801                        | (G/A)       |
| 5198        | CakSNP5198     | <i>Kabuli</i>    | <i>Ca_Kabuli_Chr04</i>       | 2035841                        | (C/T)       |
| 5199        | CakSNP5199     | <i>Kabuli</i>    | <i>Ca_Kabuli_Chr04</i>       | 2035894                        | (C/A)       |
| 5200        | CakSNP5200     | <i>Kabuli</i>    | <i>Ca_Kabuli_Chr04</i>       | 2051684                        | (T/C)       |
| 5201        | CakSNP5201     | <i>Kabuli</i>    | <i>Ca_Kabuli_Chr04</i>       | 2051642                        | (G/C)       |
| 5202        | CakSNP5202     | <i>Kabuli</i>    | <i>Ca_Kabuli_Chr04</i>       | 2060244                        | (G/A)       |
| 5203        | CakSNP5203     | <i>Kabuli</i>    | <i>Ca_Kabuli_Chr04</i>       | 2060262                        | (C/T)       |
| 5204        | CakSNP5204     | <i>Kabuli</i>    | <i>Ca_Kabuli_Chr04</i>       | 2113564                        | (A/G)       |
| 5205        | CakSNP5205     | <i>Kabuli</i>    | <i>Ca_Kabuli_Chr04</i>       | 2125774                        | (G/A)       |
| 5206        | CakSNP5206     | <i>Kabuli</i>    | <i>Ca_Kabuli_Chr04</i>       | 2143155                        | (A/G)       |
| 5207        | CakSNP5207     | <i>Kabuli</i>    | <i>Ca_Kabuli_Chr04</i>       | 2213710                        | (G/A)       |
| 5208        | CakSNP5208     | <i>Kabuli</i>    | <i>Ca_Kabuli_Chr04</i>       | 2238480                        | (A/T)       |
| 5209        | CakSNP5209     | <i>Kabuli</i>    | <i>Ca_Kabuli_Chr04</i>       | 2270360                        | (T/C)       |
| 5210        | CakSNP5210     | <i>Kabuli</i>    | <i>Ca_Kabuli_Chr04</i>       | 2277421                        | (A/T)       |
| 5211        | CakSNP5211     | <i>Kabuli</i>    | <i>Ca_Kabuli_Chr04</i>       | 2311977                        | (A/G)       |
| 5212        | CakSNP5212     | <i>Kabuli</i>    | <i>Ca_Kabuli_Chr04</i>       | 2313969                        | (G/A)       |
| 5213        | CakSNP5213     | <i>Kabuli</i>    | <i>Ca_Kabuli_Chr04</i>       | 2361088                        | (T/A)       |
| 5214        | CakSNP5214     | <i>Kabuli</i>    | <i>Ca_Kabuli_Chr04</i>       | 2380206                        | (A/G)       |
| 5215        | CakSNP5215     | <i>Kabuli</i>    | <i>Ca_Kabuli_Chr04</i>       | 2393033                        | (T/G)       |
| 5216        | CakSNP5216     | <i>Kabuli</i>    | <i>Ca_Kabuli_Chr04</i>       | 2396883                        | (A/G)       |
| 5217        | CakSNP5217     | <i>Kabuli</i>    | <i>Ca_Kabuli_Chr04</i>       | 2411925                        | (G/T)       |
| 5218        | CakSNP5218     | <i>Kabuli</i>    | <i>Ca_Kabuli_Chr04</i>       | 2422087                        | (A/G)       |
| 5219        | CakSNP5219     | <i>Kabuli</i>    | <i>Ca_Kabuli_Chr04</i>       | 2422092                        | (G/A)       |
| 5220        | CakSNP5220     | <i>Kabuli</i>    | <i>Ca_Kabuli_Chr04</i>       | 2422949                        | (C/T)       |
| 5221        | CakSNP5221     | <i>Kabuli</i>    | <i>Ca_Kabuli_Chr04</i>       | 2463064                        | (A/G)       |
| 5222        | CakSNP5222     | <i>Kabuli</i>    | <i>Ca_Kabuli_Chr04</i>       | 2463038                        | (T/C)       |
| 5223        | CakSNP5223     | <i>Kabuli</i>    | <i>Ca_Kabuli_Chr04</i>       | 2492726                        | (A/G)       |
| 5224        | CakSNP5224     | <i>Kabuli</i>    | <i>Ca_Kabuli_Chr04</i>       | 2493195                        | (T/C)       |

| <b>S.N.</b> | <b>SNP IDs</b> | <b>Cultivars</b> | <b>Chromosomes/scaffolds</b> | <b>Physical positions (bp)</b> | <b>SNPs</b> |
|-------------|----------------|------------------|------------------------------|--------------------------------|-------------|
| 5225        | CakSNP5225     | <i>Kabuli</i>    | <i>Ca_Kabuli_Chr04</i>       | 2494101                        | (C/A)       |
| 5226        | CakSNP5226     | <i>Kabuli</i>    | <i>Ca_Kabuli_Chr04</i>       | 2494140                        | (C/A)       |
| 5227        | CakSNP5227     | <i>Kabuli</i>    | <i>Ca_Kabuli_Chr04</i>       | 2499257                        | (A/C)       |
| 5228        | CakSNP5228     | <i>Kabuli</i>    | <i>Ca_Kabuli_Chr04</i>       | 2562541                        | (G/C)       |
| 5229        | CakSNP5229     | <i>Kabuli</i>    | <i>Ca_Kabuli_Chr04</i>       | 2564500                        | (T/A)       |
| 5230        | CakSNP5230     | <i>Kabuli</i>    | <i>Ca_Kabuli_Chr04</i>       | 2609945                        | (C/T)       |
| 5231        | CakSNP5231     | <i>Kabuli</i>    | <i>Ca_Kabuli_Chr04</i>       | 2676174                        | (C/T)       |
| 5232        | CakSNP5232     | <i>Kabuli</i>    | <i>Ca_Kabuli_Chr04</i>       | 2740041                        | (T/G)       |
| 5233        | CakSNP5233     | <i>Kabuli</i>    | <i>Ca_Kabuli_Chr04</i>       | 2740068                        | (A/T)       |
| 5234        | CakSNP5234     | <i>Kabuli</i>    | <i>Ca_Kabuli_Chr04</i>       | 2740065                        | (A/G)       |
| 5235        | CakSNP5235     | <i>Kabuli</i>    | <i>Ca_Kabuli_Chr04</i>       | 2752538                        | (G/A)       |
| 5236        | CakSNP5236     | <i>Kabuli</i>    | <i>Ca_Kabuli_Chr04</i>       | 2752568                        | (C/T)       |
| 5237        | CakSNP5237     | <i>Kabuli</i>    | <i>Ca_Kabuli_Chr04</i>       | 2886775                        | (T/G)       |
| 5238        | CakSNP5238     | <i>Kabuli</i>    | <i>Ca_Kabuli_Chr04</i>       | 2886863                        | (C/T)       |
| 5239        | CakSNP5239     | <i>Kabuli</i>    | <i>Ca_Kabuli_Chr04</i>       | 2978875                        | (T/C)       |
| 5240        | CakSNP5240     | <i>Kabuli</i>    | <i>Ca_Kabuli_Chr04</i>       | 2978876                        | (T/G)       |
| 5241        | CakSNP5241     | <i>Kabuli</i>    | <i>Ca_Kabuli_Chr04</i>       | 2978882                        | (G/T)       |
| 5242        | CakSNP5242     | <i>Kabuli</i>    | <i>Ca_Kabuli_Chr04</i>       | 2978932                        | (A/C)       |
| 5243        | CakSNP5243     | <i>Kabuli</i>    | <i>Ca_Kabuli_Chr04</i>       | 2978931                        | (A/T)       |
| 5244        | CakSNP5244     | <i>Kabuli</i>    | <i>Ca_Kabuli_Chr04</i>       | 3002755                        | (A/G)       |
| 5245        | CakSNP5245     | <i>Kabuli</i>    | <i>Ca_Kabuli_Chr04</i>       | 3002810                        | (T/C)       |
| 5246        | CakSNP5246     | <i>Kabuli</i>    | <i>Ca_Kabuli_Chr04</i>       | 3037899                        | (A/C)       |
| 5247        | CakSNP5247     | <i>Kabuli</i>    | <i>Ca_Kabuli_Chr04</i>       | 3037986                        | (T/A)       |
| 5248        | CakSNP5248     | <i>Kabuli</i>    | <i>Ca_Kabuli_Chr04</i>       | 3037929                        | (T/G)       |
| 5249        | CakSNP5249     | <i>Kabuli</i>    | <i>Ca_Kabuli_Chr04</i>       | 3038022                        | (C/T)       |
| 5250        | CakSNP5250     | <i>Kabuli</i>    | <i>Ca_Kabuli_Chr04</i>       | 3046920                        | (A/G)       |
| 5251        | CakSNP5251     | <i>Kabuli</i>    | <i>Ca_Kabuli_Chr04</i>       | 3144454                        | (T/C)       |
| 5252        | CakSNP5252     | <i>Kabuli</i>    | <i>Ca_Kabuli_Chr04</i>       | 3158321                        | (A/G)       |
| 5253        | CakSNP5253     | <i>Kabuli</i>    | <i>Ca_Kabuli_Chr04</i>       | 3158323                        | (T/G)       |
| 5254        | CakSNP5254     | <i>Kabuli</i>    | <i>Ca_Kabuli_Chr04</i>       | 3158328                        | (G/T)       |
| 5255        | CakSNP5255     | <i>Kabuli</i>    | <i>Ca_Kabuli_Chr04</i>       | 3158331                        | (A/T)       |
| 5256        | CakSNP5256     | <i>Kabuli</i>    | <i>Ca_Kabuli_Chr04</i>       | 3158426                        | (G/A)       |
| 5257        | CakSNP5257     | <i>Kabuli</i>    | <i>Ca_Kabuli_Chr04</i>       | 3158504                        | (A/T)       |
| 5258        | CakSNP5258     | <i>Kabuli</i>    | <i>Ca_Kabuli_Chr04</i>       | 3158506                        | (T/C)       |
| 5259        | CakSNP5259     | <i>Kabuli</i>    | <i>Ca_Kabuli_Chr04</i>       | 3158549                        | (A/G)       |
| 5260        | CakSNP5260     | <i>Kabuli</i>    | <i>Ca_Kabuli_Chr04</i>       | 3164115                        | (G/A)       |
| 5261        | CakSNP5261     | <i>Kabuli</i>    | <i>Ca_Kabuli_Chr04</i>       | 3164083                        | (G/A)       |
| 5262        | CakSNP5262     | <i>Kabuli</i>    | <i>Ca_Kabuli_Chr04</i>       | 3166657                        | (C/T)       |
| 5263        | CakSNP5263     | <i>Kabuli</i>    | <i>Ca_Kabuli_Chr04</i>       | 3166663                        | (C/T)       |



| <b>S.N.</b> | <b>SNP IDs</b> | <b>Cultivars</b> | <b>Chromosomes/scaffolds</b> | <b>Physical positions (bp)</b> | <b>SNPs</b> |
|-------------|----------------|------------------|------------------------------|--------------------------------|-------------|
| 5264        | CakSNP5264     | <i>Kabuli</i>    | <i>Ca_Kabuli_Chr04</i>       | 3166674                        | (G/T)       |
| 5265        | CakSNP5265     | <i>Kabuli</i>    | <i>Ca_Kabuli_Chr04</i>       | 3171162                        | (G/A)       |
| 5266        | CakSNP5266     | <i>Kabuli</i>    | <i>Ca_Kabuli_Chr04</i>       | 3171384                        | (T/G)       |
| 5267        | CakSNP5267     | <i>Kabuli</i>    | <i>Ca_Kabuli_Chr04</i>       | 3171385                        | (A/G)       |
| 5268        | CakSNP5268     | <i>Kabuli</i>    | <i>Ca_Kabuli_Chr04</i>       | 3171428                        | (T/C)       |
| 5269        | CakSNP5269     | <i>Kabuli</i>    | <i>Ca_Kabuli_Chr04</i>       | 3171551                        | (C/T)       |
| 5270        | CakSNP5270     | <i>Kabuli</i>    | <i>Ca_Kabuli_Chr04</i>       | 3264351                        | (T/C)       |
| 5271        | CakSNP5271     | <i>Kabuli</i>    | <i>Ca_Kabuli_Chr04</i>       | 3280147                        | (G/A)       |
| 5272        | CakSNP5272     | <i>Kabuli</i>    | <i>Ca_Kabuli_Chr04</i>       | 3280217                        | (A/G)       |
| 5273        | CakSNP5273     | <i>Kabuli</i>    | <i>Ca_Kabuli_Chr04</i>       | 3281050                        | (T/G)       |
| 5274        | CakSNP5274     | <i>Kabuli</i>    | <i>Ca_Kabuli_Chr04</i>       | 3290298                        | (T/G)       |
| 5275        | CakSNP5275     | <i>Kabuli</i>    | <i>Ca_Kabuli_Chr04</i>       | 3353106                        | (T/C)       |
| 5276        | CakSNP5276     | <i>Kabuli</i>    | <i>Ca_Kabuli_Chr04</i>       | 3356252                        | (C/G)       |
| 5277        | CakSNP5277     | <i>Kabuli</i>    | <i>Ca_Kabuli_Chr04</i>       | 3356242                        | (C/G)       |
| 5278        | CakSNP5278     | <i>Kabuli</i>    | <i>Ca_Kabuli_Chr04</i>       | 3400828                        | (G/C)       |
| 5279        | CakSNP5279     | <i>Kabuli</i>    | <i>Ca_Kabuli_Chr04</i>       | 3427396                        | (A/G)       |
| 5280        | CakSNP5280     | <i>Kabuli</i>    | <i>Ca_Kabuli_Chr04</i>       | 3429035                        | (G/A)       |
| 5281        | CakSNP5281     | <i>Kabuli</i>    | <i>Ca_Kabuli_Chr04</i>       | 3429059                        | (C/A)       |
| 5282        | CakSNP5282     | <i>Kabuli</i>    | <i>Ca_Kabuli_Chr04</i>       | 3455029                        | (T/C)       |
| 5283        | CakSNP5283     | <i>Kabuli</i>    | <i>Ca_Kabuli_Chr04</i>       | 3455047                        | (G/A)       |
| 5284        | CakSNP5284     | <i>Kabuli</i>    | <i>Ca_Kabuli_Chr04</i>       | 3456450                        | (G/T)       |
| 5285        | CakSNP5285     | <i>Kabuli</i>    | <i>Ca_Kabuli_Chr04</i>       | 3456501                        | (C/T)       |
| 5286        | CakSNP5286     | <i>Kabuli</i>    | <i>Ca_Kabuli_Chr04</i>       | 3483687                        | (A/C)       |
| 5287        | CakSNP5287     | <i>Kabuli</i>    | <i>Ca_Kabuli_Chr04</i>       | 3627810                        | (G/T)       |
| 5288        | CakSNP5288     | <i>Kabuli</i>    | <i>Ca_Kabuli_Chr04</i>       | 3642051                        | (A/T)       |
| 5289        | CakSNP5289     | <i>Kabuli</i>    | <i>Ca_Kabuli_Chr04</i>       | 3642070                        | (T/C)       |
| 5290        | CakSNP5290     | <i>Kabuli</i>    | <i>Ca_Kabuli_Chr04</i>       | 3642116                        | (A/T)       |
| 5291        | CakSNP5291     | <i>Kabuli</i>    | <i>Ca_Kabuli_Chr04</i>       | 3689840                        | (T/C)       |
| 5292        | CakSNP5292     | <i>Kabuli</i>    | <i>Ca_Kabuli_Chr04</i>       | 3689871                        | (G/A)       |
| 5293        | CakSNP5293     | <i>Kabuli</i>    | <i>Ca_Kabuli_Chr04</i>       | 3739386                        | (C/A)       |
| 5294        | CakSNP5294     | <i>Kabuli</i>    | <i>Ca_Kabuli_Chr04</i>       | 3741522                        | (T/G)       |
| 5295        | CakSNP5295     | <i>Kabuli</i>    | <i>Ca_Kabuli_Chr04</i>       | 3741539                        | (T/G)       |
| 5296        | CakSNP5296     | <i>Kabuli</i>    | <i>Ca_Kabuli_Chr04</i>       | 3752141                        | (C/G)       |
| 5297        | CakSNP5297     | <i>Kabuli</i>    | <i>Ca_Kabuli_Chr04</i>       | 3762559                        | (T/C)       |
| 5298        | CakSNP5298     | <i>Kabuli</i>    | <i>Ca_Kabuli_Chr04</i>       | 3762561                        | (C/A)       |
| 5299        | CakSNP5299     | <i>Kabuli</i>    | <i>Ca_Kabuli_Chr04</i>       | 3762585                        | (G/T)       |
| 5300        | CakSNP5300     | <i>Kabuli</i>    | <i>Ca_Kabuli_Chr04</i>       | 3794764                        | (G/A)       |
| 5301        | CakSNP5301     | <i>Kabuli</i>    | <i>Ca_Kabuli_Chr04</i>       | 3794885                        | (C/A)       |
| 5302        | CakSNP5302     | <i>Kabuli</i>    | <i>Ca_Kabuli_Chr04</i>       | 3885444                        | (G/C)       |

| <b>S.N.</b> | <b>SNP IDs</b> | <b>Cultivars</b> | <b>Chromosomes/scaffolds</b> | <b>Physical positions (bp)</b> | <b>SNPs</b> |
|-------------|----------------|------------------|------------------------------|--------------------------------|-------------|
| 5303        | CakSNP5303     | <i>Kabuli</i>    | <i>Ca_Kabuli_Chr04</i>       | 3888010                        | (G/C)       |
| 5304        | CakSNP5304     | <i>Kabuli</i>    | <i>Ca_Kabuli_Chr04</i>       | 3888053                        | (C/A)       |
| 5305        | CakSNP5305     | <i>Kabuli</i>    | <i>Ca_Kabuli_Chr04</i>       | 3888164                        | (T/A)       |
| 5306        | CakSNP5306     | <i>Kabuli</i>    | <i>Ca_Kabuli_Chr04</i>       | 3888185                        | (A/G)       |
| 5307        | CakSNP5307     | <i>Kabuli</i>    | <i>Ca_Kabuli_Chr04</i>       | 3888236                        | (A/G)       |
| 5308        | CakSNP5308     | <i>Kabuli</i>    | <i>Ca_Kabuli_Chr04</i>       | 3888328                        | (C/T)       |
| 5309        | CakSNP5309     | <i>Kabuli</i>    | <i>Ca_Kabuli_Chr04</i>       | 3888462                        | (T/C)       |
| 5310        | CakSNP5310     | <i>Kabuli</i>    | <i>Ca_Kabuli_Chr04</i>       | 3888510                        | (G/A)       |
| 5311        | CakSNP5311     | <i>Kabuli</i>    | <i>Ca_Kabuli_Chr04</i>       | 3888514                        | (G/A)       |
| 5312        | CakSNP5312     | <i>Kabuli</i>    | <i>Ca_Kabuli_Chr04</i>       | 3888529                        | (T/G)       |
| 5313        | CakSNP5313     | <i>Kabuli</i>    | <i>Ca_Kabuli_Chr04</i>       | 3890556                        | (A/G)       |
| 5314        | CakSNP5314     | <i>Kabuli</i>    | <i>Ca_Kabuli_Chr04</i>       | 3890709                        | (A/G)       |
| 5315        | CakSNP5315     | <i>Kabuli</i>    | <i>Ca_Kabuli_Chr04</i>       | 3990810                        | (C/G)       |
| 5316        | CakSNP5316     | <i>Kabuli</i>    | <i>Ca_Kabuli_Chr04</i>       | 3990809                        | (G/A)       |
| 5317        | CakSNP5317     | <i>Kabuli</i>    | <i>Ca_Kabuli_Chr04</i>       | 4002917                        | (T/C)       |
| 5318        | CakSNP5318     | <i>Kabuli</i>    | <i>Ca_Kabuli_Chr04</i>       | 4006213                        | (A/C)       |
| 5319        | CakSNP5319     | <i>Kabuli</i>    | <i>Ca_Kabuli_Chr04</i>       | 4027829                        | (A/T)       |
| 5320        | CakSNP5320     | <i>Kabuli</i>    | <i>Ca_Kabuli_Chr04</i>       | 4027872                        | (A/C)       |
| 5321        | CakSNP5321     | <i>Kabuli</i>    | <i>Ca_Kabuli_Chr04</i>       | 4097989                        | (G/A)       |
| 5322        | CakSNP5322     | <i>Kabuli</i>    | <i>Ca_Kabuli_Chr04</i>       | 4097935                        | (T/C)       |
| 5323        | CakSNP5323     | <i>Kabuli</i>    | <i>Ca_Kabuli_Chr04</i>       | 4116386                        | (G/C)       |
| 5324        | CakSNP5324     | <i>Kabuli</i>    | <i>Ca_Kabuli_Chr04</i>       | 4148061                        | (T/C)       |
| 5325        | CakSNP5325     | <i>Kabuli</i>    | <i>Ca_Kabuli_Chr04</i>       | 4148250                        | (A/G)       |
| 5326        | CakSNP5326     | <i>Kabuli</i>    | <i>Ca_Kabuli_Chr04</i>       | 4154417                        | (A/C)       |
| 5327        | CakSNP5327     | <i>Kabuli</i>    | <i>Ca_Kabuli_Chr04</i>       | 4154507                        | (G/T)       |
| 5328        | CakSNP5328     | <i>Kabuli</i>    | <i>Ca_Kabuli_Chr04</i>       | 4229295                        | (T/A)       |
| 5329        | CakSNP5329     | <i>Kabuli</i>    | <i>Ca_Kabuli_Chr04</i>       | 4229345                        | (C/T)       |
| 5330        | CakSNP5330     | <i>Kabuli</i>    | <i>Ca_Kabuli_Chr04</i>       | 4229381                        | (T/C)       |
| 5331        | CakSNP5331     | <i>Kabuli</i>    | <i>Ca_Kabuli_Chr04</i>       | 4229371                        | (C/T)       |
| 5332        | CakSNP5332     | <i>Kabuli</i>    | <i>Ca_Kabuli_Chr04</i>       | 4255863                        | (T/G)       |
| 5333        | CakSNP5333     | <i>Kabuli</i>    | <i>Ca_Kabuli_Chr04</i>       | 4256023                        | (C/T)       |
| 5334        | CakSNP5334     | <i>Kabuli</i>    | <i>Ca_Kabuli_Chr04</i>       | 4258002                        | (A/G)       |
| 5335        | CakSNP5335     | <i>Kabuli</i>    | <i>Ca_Kabuli_Chr04</i>       | 4258149                        | (A/G)       |
| 5336        | CakSNP5336     | <i>Kabuli</i>    | <i>Ca_Kabuli_Chr04</i>       | 4305891                        | (A/C)       |
| 5337        | CakSNP5337     | <i>Kabuli</i>    | <i>Ca_Kabuli_Chr04</i>       | 4320615                        | (C/T)       |
| 5338        | CakSNP5338     | <i>Kabuli</i>    | <i>Ca_Kabuli_Chr04</i>       | 4320743                        | (A/G)       |
| 5339        | CakSNP5339     | <i>Kabuli</i>    | <i>Ca_Kabuli_Chr04</i>       | 4327268                        | (A/G)       |
| 5340        | CakSNP5340     | <i>Kabuli</i>    | <i>Ca_Kabuli_Chr04</i>       | 4334307                        | (T/G)       |
| 5341        | CakSNP5341     | <i>Kabuli</i>    | <i>Ca_Kabuli_Chr04</i>       | 4343586                        | (C/T)       |

| <b>S.N.</b> | <b>SNP IDs</b> | <b>Cultivars</b> | <b>Chromosomes/scaffolds</b> | <b>Physical positions (bp)</b> | <b>SNPs</b> |
|-------------|----------------|------------------|------------------------------|--------------------------------|-------------|
| 5342        | CakSNP5342     | <i>Kabuli</i>    | <i>Ca_Kabuli_Chr04</i>       | 4343540                        | (C/A)       |
| 5343        | CakSNP5343     | <i>Kabuli</i>    | <i>Ca_Kabuli_Chr04</i>       | 4410351                        | (T/C)       |
| 5344        | CakSNP5344     | <i>Kabuli</i>    | <i>Ca_Kabuli_Chr04</i>       | 4426659                        | (C/T)       |
| 5345        | CakSNP5345     | <i>Kabuli</i>    | <i>Ca_Kabuli_Chr04</i>       | 4426760                        | (T/C)       |
| 5346        | CakSNP5346     | <i>Kabuli</i>    | <i>Ca_Kabuli_Chr04</i>       | 4435621                        | (T/C)       |
| 5347        | CakSNP5347     | <i>Kabuli</i>    | <i>Ca_Kabuli_Chr04</i>       | 4451928                        | (T/C)       |
| 5348        | CakSNP5348     | <i>Kabuli</i>    | <i>Ca_Kabuli_Chr04</i>       | 4452018                        | (T/A)       |
| 5349        | CakSNP5349     | <i>Kabuli</i>    | <i>Ca_Kabuli_Chr04</i>       | 4452380                        | (C/G)       |
| 5350        | CakSNP5350     | <i>Kabuli</i>    | <i>Ca_Kabuli_Chr04</i>       | 4454305                        | (A/C)       |
| 5351        | CakSNP5351     | <i>Kabuli</i>    | <i>Ca_Kabuli_Chr04</i>       | 4454464                        | (A/G)       |
| 5352        | CakSNP5352     | <i>Kabuli</i>    | <i>Ca_Kabuli_Chr04</i>       | 4461562                        | (G/C)       |
| 5353        | CakSNP5353     | <i>Kabuli</i>    | <i>Ca_Kabuli_Chr04</i>       | 4468394                        | (C/T)       |
| 5354        | CakSNP5354     | <i>Kabuli</i>    | <i>Ca_Kabuli_Chr04</i>       | 4536310                        | (A/G)       |
| 5355        | CakSNP5355     | <i>Kabuli</i>    | <i>Ca_Kabuli_Chr04</i>       | 4536286                        | (G/C)       |
| 5356        | CakSNP5356     | <i>Kabuli</i>    | <i>Ca_Kabuli_Chr04</i>       | 4578836                        | (C/T)       |
| 5357        | CakSNP5357     | <i>Kabuli</i>    | <i>Ca_Kabuli_Chr04</i>       | 4579274                        | (C/T)       |
| 5358        | CakSNP5358     | <i>Kabuli</i>    | <i>Ca_Kabuli_Chr04</i>       | 4605340                        | (A/C)       |
| 5359        | CakSNP5359     | <i>Kabuli</i>    | <i>Ca_Kabuli_Chr04</i>       | 4622932                        | (T/G)       |
| 5360        | CakSNP5360     | <i>Kabuli</i>    | <i>Ca_Kabuli_Chr04</i>       | 4622913                        | (C/T)       |
| 5361        | CakSNP5361     | <i>Kabuli</i>    | <i>Ca_Kabuli_Chr04</i>       | 4628221                        | (T/G)       |
| 5362        | CakSNP5362     | <i>Kabuli</i>    | <i>Ca_Kabuli_Chr04</i>       | 4628232                        | (G/A)       |
| 5363        | CakSNP5363     | <i>Kabuli</i>    | <i>Ca_Kabuli_Chr04</i>       | 4628240                        | (C/T)       |
| 5364        | CakSNP5364     | <i>Kabuli</i>    | <i>Ca_Kabuli_Chr04</i>       | 4628243                        | (G/A)       |
| 5365        | CakSNP5365     | <i>Kabuli</i>    | <i>Ca_Kabuli_Chr04</i>       | 4628309                        | (C/T)       |
| 5366        | CakSNP5366     | <i>Kabuli</i>    | <i>Ca_Kabuli_Chr04</i>       | 4630407                        | (G/A)       |
| 5367        | CakSNP5367     | <i>Kabuli</i>    | <i>Ca_Kabuli_Chr04</i>       | 4630419                        | (A/C)       |
| 5368        | CakSNP5368     | <i>Kabuli</i>    | <i>Ca_Kabuli_Chr04</i>       | 4630514                        | (T/C)       |
| 5369        | CakSNP5369     | <i>Kabuli</i>    | <i>Ca_Kabuli_Chr04</i>       | 4633913                        | (T/G)       |
| 5370        | CakSNP5370     | <i>Kabuli</i>    | <i>Ca_Kabuli_Chr04</i>       | 4634542                        | (A/T)       |
| 5371        | CakSNP5371     | <i>Kabuli</i>    | <i>Ca_Kabuli_Chr04</i>       | 4660220                        | (A/G)       |
| 5372        | CakSNP5372     | <i>Kabuli</i>    | <i>Ca_Kabuli_Chr04</i>       | 4670913                        | (A/G)       |
| 5373        | CakSNP5373     | <i>Kabuli</i>    | <i>Ca_Kabuli_Chr04</i>       | 4670975                        | (C/A)       |
| 5374        | CakSNP5374     | <i>Kabuli</i>    | <i>Ca_Kabuli_Chr04</i>       | 4675182                        | (T/G)       |
| 5375        | CakSNP5375     | <i>Kabuli</i>    | <i>Ca_Kabuli_Chr04</i>       | 4675177                        | (T/A)       |
| 5376        | CakSNP5376     | <i>Kabuli</i>    | <i>Ca_Kabuli_Chr04</i>       | 4675176                        | (T/G)       |
| 5377        | CakSNP5377     | <i>Kabuli</i>    | <i>Ca_Kabuli_Chr04</i>       | 4675172                        | (T/A)       |
| 5378        | CakSNP5378     | <i>Kabuli</i>    | <i>Ca_Kabuli_Chr04</i>       | 4675171                        | (T/A)       |
| 5379        | CakSNP5379     | <i>Kabuli</i>    | <i>Ca_Kabuli_Chr04</i>       | 4675166                        | (A/T)       |
| 5380        | CakSNP5380     | <i>Kabuli</i>    | <i>Ca_Kabuli_Chr04</i>       | 4679236                        | (A/G)       |

| <b>S.N.</b> | <b>SNP IDs</b> | <b>Cultivars</b> | <b>Chromosomes/scaffolds</b> | <b>Physical positions (bp)</b> | <b>SNPs</b> |
|-------------|----------------|------------------|------------------------------|--------------------------------|-------------|
| 5381        | CakSNP5381     | <i>Kabuli</i>    | <i>Ca_Kabuli_Chr04</i>       | 4707682                        | (A/G)       |
| 5382        | CakSNP5382     | <i>Kabuli</i>    | <i>Ca_Kabuli_Chr04</i>       | 4722348                        | (G/A)       |
| 5383        | CakSNP5383     | <i>Kabuli</i>    | <i>Ca_Kabuli_Chr04</i>       | 4757357                        | (T/C)       |
| 5384        | CakSNP5384     | <i>Kabuli</i>    | <i>Ca_Kabuli_Chr04</i>       | 4757416                        | (G/A)       |
| 5385        | CakSNP5385     | <i>Kabuli</i>    | <i>Ca_Kabuli_Chr04</i>       | 4757498                        | (C/G)       |
| 5386        | CakSNP5386     | <i>Kabuli</i>    | <i>Ca_Kabuli_Chr04</i>       | 4794122                        | (G/A)       |
| 5387        | CakSNP5387     | <i>Kabuli</i>    | <i>Ca_Kabuli_Chr04</i>       | 4794192                        | (G/C)       |
| 5388        | CakSNP5388     | <i>Kabuli</i>    | <i>Ca_Kabuli_Chr04</i>       | 4799122                        | (C/T)       |
| 5389        | CakSNP5389     | <i>Kabuli</i>    | <i>Ca_Kabuli_Chr04</i>       | 4799116                        | (C/T)       |
| 5390        | CakSNP5390     | <i>Kabuli</i>    | <i>Ca_Kabuli_Chr04</i>       | 4803168                        | (T/A)       |
| 5391        | CakSNP5391     | <i>Kabuli</i>    | <i>Ca_Kabuli_Chr04</i>       | 4803213                        | (C/T)       |
| 5392        | CakSNP5392     | <i>Kabuli</i>    | <i>Ca_Kabuli_Chr04</i>       | 4874780                        | (A/T)       |
| 5393        | CakSNP5393     | <i>Kabuli</i>    | <i>Ca_Kabuli_Chr04</i>       | 4874782                        | (C/A)       |
| 5394        | CakSNP5394     | <i>Kabuli</i>    | <i>Ca_Kabuli_Chr04</i>       | 4874836                        | (C/T)       |
| 5395        | CakSNP5395     | <i>Kabuli</i>    | <i>Ca_Kabuli_Chr04</i>       | 4882813                        | (C/G)       |
| 5396        | CakSNP5396     | <i>Kabuli</i>    | <i>Ca_Kabuli_Chr04</i>       | 4897934                        | (C/G)       |
| 5397        | CakSNP5397     | <i>Kabuli</i>    | <i>Ca_Kabuli_Chr04</i>       | 4907987                        | (G/A)       |
| 5398        | CakSNP5398     | <i>Kabuli</i>    | <i>Ca_Kabuli_Chr04</i>       | 4911083                        | (T/C)       |
| 5399        | CakSNP5399     | <i>Kabuli</i>    | <i>Ca_Kabuli_Chr04</i>       | 4911130                        | (T/C)       |
| 5400        | CakSNP5400     | <i>Kabuli</i>    | <i>Ca_Kabuli_Chr04</i>       | 4911209                        | (A/G)       |
| 5401        | CakSNP5401     | <i>Kabuli</i>    | <i>Ca_Kabuli_Chr04</i>       | 4911217                        | (A/C)       |
| 5402        | CakSNP5402     | <i>Kabuli</i>    | <i>Ca_Kabuli_Chr04</i>       | 4920706                        | (T/C)       |
| 5403        | CakSNP5403     | <i>Kabuli</i>    | <i>Ca_Kabuli_Chr04</i>       | 4920712                        | (A/T)       |
| 5404        | CakSNP5404     | <i>Kabuli</i>    | <i>Ca_Kabuli_Chr04</i>       | 4920719                        | (A/G)       |
| 5405        | CakSNP5405     | <i>Kabuli</i>    | <i>Ca_Kabuli_Chr04</i>       | 4922290                        | (A/C)       |
| 5406        | CakSNP5406     | <i>Kabuli</i>    | <i>Ca_Kabuli_Chr04</i>       | 4928764                        | (T/C)       |
| 5407        | CakSNP5407     | <i>Kabuli</i>    | <i>Ca_Kabuli_Chr04</i>       | 4928890                        | (A/G)       |
| 5408        | CakSNP5408     | <i>Kabuli</i>    | <i>Ca_Kabuli_Chr04</i>       | 4929387                        | (T/C)       |
| 5409        | CakSNP5409     | <i>Kabuli</i>    | <i>Ca_Kabuli_Chr04</i>       | 4953629                        | (C/A)       |
| 5410        | CakSNP5410     | <i>Kabuli</i>    | <i>Ca_Kabuli_Chr04</i>       | 4967336                        | (T/C)       |
| 5411        | CakSNP5411     | <i>Kabuli</i>    | <i>Ca_Kabuli_Chr04</i>       | 4967342                        | (G/A)       |
| 5412        | CakSNP5412     | <i>Kabuli</i>    | <i>Ca_Kabuli_Chr04</i>       | 4967347                        | (A/G)       |
| 5413        | CakSNP5413     | <i>Kabuli</i>    | <i>Ca_Kabuli_Chr04</i>       | 5018591                        | (G/A)       |
| 5414        | CakSNP5414     | <i>Kabuli</i>    | <i>Ca_Kabuli_Chr04</i>       | 5038300                        | (G/C)       |
| 5415        | CakSNP5415     | <i>Kabuli</i>    | <i>Ca_Kabuli_Chr04</i>       | 5051617                        | (A/G)       |
| 5416        | CakSNP5416     | <i>Kabuli</i>    | <i>Ca_Kabuli_Chr04</i>       | 5051574                        | (T/G)       |
| 5417        | CakSNP5417     | <i>Kabuli</i>    | <i>Ca_Kabuli_Chr04</i>       | 5051573                        | (A/C)       |
| 5418        | CakSNP5418     | <i>Kabuli</i>    | <i>Ca_Kabuli_Chr04</i>       | 5086705                        | (T/C)       |
| 5419        | CakSNP5419     | <i>Kabuli</i>    | <i>Ca_Kabuli_Chr04</i>       | 5120207                        | (C/T)       |

| <b>S.N.</b> | <b>SNP IDs</b> | <b>Cultivars</b> | <b>Chromosomes/scaffolds</b> | <b>Physical positions (bp)</b> | <b>SNPs</b> |
|-------------|----------------|------------------|------------------------------|--------------------------------|-------------|
| 5420        | CakSNP5420     | <i>Kabuli</i>    | <i>Ca_Kabuli_Chr04</i>       | 5186401                        | (A/G)       |
| 5421        | CakSNP5421     | <i>Kabuli</i>    | <i>Ca_Kabuli_Chr04</i>       | 5187402                        | (G/C)       |
| 5422        | CakSNP5422     | <i>Kabuli</i>    | <i>Ca_Kabuli_Chr04</i>       | 5187344                        | (C/G)       |
| 5423        | CakSNP5423     | <i>Kabuli</i>    | <i>Ca_Kabuli_Chr04</i>       | 5188084                        | (G/A)       |
| 5424        | CakSNP5424     | <i>Kabuli</i>    | <i>Ca_Kabuli_Chr04</i>       | 5188040                        | (A/G)       |
| 5425        | CakSNP5425     | <i>Kabuli</i>    | <i>Ca_Kabuli_Chr04</i>       | 5197824                        | (T/C)       |
| 5426        | CakSNP5426     | <i>Kabuli</i>    | <i>Ca_Kabuli_Chr04</i>       | 5199907                        | (C/T)       |
| 5427        | CakSNP5427     | <i>Kabuli</i>    | <i>Ca_Kabuli_Chr04</i>       | 5222669                        | (A/C)       |
| 5428        | CakSNP5428     | <i>Kabuli</i>    | <i>Ca_Kabuli_Chr04</i>       | 5222805                        | (G/C)       |
| 5429        | CakSNP5429     | <i>Kabuli</i>    | <i>Ca_Kabuli_Chr04</i>       | 5222851                        | (C/T)       |
| 5430        | CakSNP5430     | <i>Kabuli</i>    | <i>Ca_Kabuli_Chr04</i>       | 5223100                        | (G/A)       |
| 5431        | CakSNP5431     | <i>Kabuli</i>    | <i>Ca_Kabuli_Chr04</i>       | 5223206                        | (A/T)       |
| 5432        | CakSNP5432     | <i>Kabuli</i>    | <i>Ca_Kabuli_Chr04</i>       | 5228950                        | (G/T)       |
| 5433        | CakSNP5433     | <i>Kabuli</i>    | <i>Ca_Kabuli_Chr04</i>       | 5232364                        | (T/C)       |
| 5434        | CakSNP5434     | <i>Kabuli</i>    | <i>Ca_Kabuli_Chr04</i>       | 5263199                        | (A/G)       |
| 5435        | CakSNP5435     | <i>Kabuli</i>    | <i>Ca_Kabuli_Chr04</i>       | 5268995                        | (A/C)       |
| 5436        | CakSNP5436     | <i>Kabuli</i>    | <i>Ca_Kabuli_Chr04</i>       | 5282131                        | (T/C)       |
| 5437        | CakSNP5437     | <i>Kabuli</i>    | <i>Ca_Kabuli_Chr04</i>       | 5310873                        | (A/G)       |
| 5438        | CakSNP5438     | <i>Kabuli</i>    | <i>Ca_Kabuli_Chr04</i>       | 5345520                        | (T/G)       |
| 5439        | CakSNP5439     | <i>Kabuli</i>    | <i>Ca_Kabuli_Chr04</i>       | 5377067                        | (A/C)       |
| 5440        | CakSNP5440     | <i>Kabuli</i>    | <i>Ca_Kabuli_Chr04</i>       | 5377400                        | (C/T)       |
| 5441        | CakSNP5441     | <i>Kabuli</i>    | <i>Ca_Kabuli_Chr04</i>       | 5390236                        | (C/A)       |
| 5442        | CakSNP5442     | <i>Kabuli</i>    | <i>Ca_Kabuli_Chr04</i>       | 5390317                        | (G/A)       |
| 5443        | CakSNP5443     | <i>Kabuli</i>    | <i>Ca_Kabuli_Chr04</i>       | 5453008                        | (A/C)       |
| 5444        | CakSNP5444     | <i>Kabuli</i>    | <i>Ca_Kabuli_Chr04</i>       | 5473174                        | (C/T)       |
| 5445        | CakSNP5445     | <i>Kabuli</i>    | <i>Ca_Kabuli_Chr04</i>       | 5484259                        | (G/T)       |
| 5446        | CakSNP5446     | <i>Kabuli</i>    | <i>Ca_Kabuli_Chr04</i>       | 5484257                        | (G/C)       |
| 5447        | CakSNP5447     | <i>Kabuli</i>    | <i>Ca_Kabuli_Chr04</i>       | 5484238                        | (G/A)       |
| 5448        | CakSNP5448     | <i>Kabuli</i>    | <i>Ca_Kabuli_Chr04</i>       | 5484236                        | (C/T)       |
| 5449        | CakSNP5449     | <i>Kabuli</i>    | <i>Ca_Kabuli_Chr04</i>       | 5484220                        | (A/G)       |
| 5450        | CakSNP5450     | <i>Kabuli</i>    | <i>Ca_Kabuli_Chr04</i>       | 5485052                        | (G/T)       |
| 5451        | CakSNP5451     | <i>Kabuli</i>    | <i>Ca_Kabuli_Chr04</i>       | 5485050                        | (G/C)       |
| 5452        | CakSNP5452     | <i>Kabuli</i>    | <i>Ca_Kabuli_Chr04</i>       | 5485031                        | (G/A)       |
| 5453        | CakSNP5453     | <i>Kabuli</i>    | <i>Ca_Kabuli_Chr04</i>       | 5485029                        | (C/T)       |
| 5454        | CakSNP5454     | <i>Kabuli</i>    | <i>Ca_Kabuli_Chr04</i>       | 5485013                        | (A/G)       |
| 5455        | CakSNP5455     | <i>Kabuli</i>    | <i>Ca_Kabuli_Chr04</i>       | 5528421                        | (T/G)       |
| 5456        | CakSNP5456     | <i>Kabuli</i>    | <i>Ca_Kabuli_Chr04</i>       | 5530612                        | (A/G)       |
| 5457        | CakSNP5457     | <i>Kabuli</i>    | <i>Ca_Kabuli_Chr04</i>       | 5535661                        | (A/G)       |
| 5458        | CakSNP5458     | <i>Kabuli</i>    | <i>Ca_Kabuli_Chr04</i>       | 5575846                        | (G/C)       |

| <b>S.N.</b> | <b>SNP IDs</b> | <b>Cultivars</b> | <b>Chromosomes/scaffolds</b> | <b>Physical positions (bp)</b> | <b>SNPs</b> |
|-------------|----------------|------------------|------------------------------|--------------------------------|-------------|
| 5459        | CakSNP5459     | <i>Kabuli</i>    | <i>Ca_Kabuli_Chr04</i>       | 5595079                        | (T/C)       |
| 5460        | CakSNP5460     | <i>Kabuli</i>    | <i>Ca_Kabuli_Chr04</i>       | 5595077                        | (T/A)       |
| 5461        | CakSNP5461     | <i>Kabuli</i>    | <i>Ca_Kabuli_Chr04</i>       | 5623571                        | (A/G)       |
| 5462        | CakSNP5462     | <i>Kabuli</i>    | <i>Ca_Kabuli_Chr04</i>       | 5627096                        | (C/T)       |
| 5463        | CakSNP5463     | <i>Kabuli</i>    | <i>Ca_Kabuli_Chr04</i>       | 5701873                        | (A/C)       |
| 5464        | CakSNP5464     | <i>Kabuli</i>    | <i>Ca_Kabuli_Chr04</i>       | 5701900                        | (G/T)       |
| 5465        | CakSNP5465     | <i>Kabuli</i>    | <i>Ca_Kabuli_Chr04</i>       | 5701902                        | (C/T)       |
| 5466        | CakSNP5466     | <i>Kabuli</i>    | <i>Ca_Kabuli_Chr04</i>       | 5701907                        | (G/T)       |
| 5467        | CakSNP5467     | <i>Kabuli</i>    | <i>Ca_Kabuli_Chr04</i>       | 5779698                        | (A/G)       |
| 5468        | CakSNP5468     | <i>Kabuli</i>    | <i>Ca_Kabuli_Chr04</i>       | 5779765                        | (A/T)       |
| 5469        | CakSNP5469     | <i>Kabuli</i>    | <i>Ca_Kabuli_Chr04</i>       | 5787727                        | (G/A)       |
| 5470        | CakSNP5470     | <i>Kabuli</i>    | <i>Ca_Kabuli_Chr04</i>       | 5787722                        | (G/A)       |
| 5471        | CakSNP5471     | <i>Kabuli</i>    | <i>Ca_Kabuli_Chr04</i>       | 5841444                        | (C/G)       |
| 5472        | CakSNP5472     | <i>Kabuli</i>    | <i>Ca_Kabuli_Chr04</i>       | 5841462                        | (A/C)       |
| 5473        | CakSNP5473     | <i>Kabuli</i>    | <i>Ca_Kabuli_Chr04</i>       | 5853789                        | (C/T)       |
| 5474        | CakSNP5474     | <i>Kabuli</i>    | <i>Ca_Kabuli_Chr04</i>       | 5853798                        | (T/G)       |
| 5475        | CakSNP5475     | <i>Kabuli</i>    | <i>Ca_Kabuli_Chr04</i>       | 5900194                        | (C/A)       |
| 5476        | CakSNP5476     | <i>Kabuli</i>    | <i>Ca_Kabuli_Chr04</i>       | 5900290                        | (T/C)       |
| 5477        | CakSNP5477     | <i>Kabuli</i>    | <i>Ca_Kabuli_Chr04</i>       | 5905252                        | (C/T)       |
| 5478        | CakSNP5478     | <i>Kabuli</i>    | <i>Ca_Kabuli_Chr04</i>       | 5905276                        | (C/T)       |
| 5479        | CakSNP5479     | <i>Kabuli</i>    | <i>Ca_Kabuli_Chr04</i>       | 5905303                        | (A/C)       |
| 5480        | CakSNP5480     | <i>Kabuli</i>    | <i>Ca_Kabuli_Chr04</i>       | 5905385                        | (G/A)       |
| 5481        | CakSNP5481     | <i>Kabuli</i>    | <i>Ca_Kabuli_Chr04</i>       | 5907409                        | (T/G)       |
| 5482        | CakSNP5482     | <i>Kabuli</i>    | <i>Ca_Kabuli_Chr04</i>       | 5907421                        | (T/G)       |
| 5483        | CakSNP5483     | <i>Kabuli</i>    | <i>Ca_Kabuli_Chr04</i>       | 5907437                        | (C/A)       |
| 5484        | CakSNP5484     | <i>Kabuli</i>    | <i>Ca_Kabuli_Chr04</i>       | 5907465                        | (C/A)       |
| 5485        | CakSNP5485     | <i>Kabuli</i>    | <i>Ca_Kabuli_Chr04</i>       | 5940176                        | (C/T)       |
| 5486        | CakSNP5486     | <i>Kabuli</i>    | <i>Ca_Kabuli_Chr04</i>       | 5999964                        | (T/C)       |
| 5487        | CakSNP5487     | <i>Kabuli</i>    | <i>Ca_Kabuli_Chr04</i>       | 6000010                        | (T/A)       |
| 5488        | CakSNP5488     | <i>Kabuli</i>    | <i>Ca_Kabuli_Chr04</i>       | 6000013                        | (A/C)       |
| 5489        | CakSNP5489     | <i>Kabuli</i>    | <i>Ca_Kabuli_Chr04</i>       | 6000037                        | (T/G)       |
| 5490        | CakSNP5490     | <i>Kabuli</i>    | <i>Ca_Kabuli_Chr04</i>       | 6006849                        | (T/G)       |
| 5491        | CakSNP5491     | <i>Kabuli</i>    | <i>Ca_Kabuli_Chr04</i>       | 6030948                        | (T/G)       |
| 5492        | CakSNP5492     | <i>Kabuli</i>    | <i>Ca_Kabuli_Chr04</i>       | 6030966                        | (A/G)       |
| 5493        | CakSNP5493     | <i>Kabuli</i>    | <i>Ca_Kabuli_Chr04</i>       | 6041134                        | (A/C)       |
| 5494        | CakSNP5494     | <i>Kabuli</i>    | <i>Ca_Kabuli_Chr04</i>       | 6041130                        | (C/A)       |
| 5495        | CakSNP5495     | <i>Kabuli</i>    | <i>Ca_Kabuli_Chr04</i>       | 6041126                        | (A/G)       |
| 5496        | CakSNP5496     | <i>Kabuli</i>    | <i>Ca_Kabuli_Chr04</i>       | 6041120                        | (G/T)       |
| 5497        | CakSNP5497     | <i>Kabuli</i>    | <i>Ca_Kabuli_Chr04</i>       | 6041117                        | (C/T)       |

| <b>S.N.</b> | <b>SNP IDs</b> | <b>Cultivars</b> | <b>Chromosomes/scaffolds</b> | <b>Physical positions (bp)</b> | <b>SNPs</b> |
|-------------|----------------|------------------|------------------------------|--------------------------------|-------------|
| 5498        | CakSNP5498     | <i>Kabuli</i>    | <i>Ca_Kabuli_Chr04</i>       | 6076530                        | (T/C)       |
| 5499        | CakSNP5499     | <i>Kabuli</i>    | <i>Ca_Kabuli_Chr04</i>       | 6076594                        | (G/C)       |
| 5500        | CakSNP5500     | <i>Kabuli</i>    | <i>Ca_Kabuli_Chr04</i>       | 6076614                        | (A/G)       |
| 5501        | CakSNP5501     | <i>Kabuli</i>    | <i>Ca_Kabuli_Chr04</i>       | 6077103                        | (G/A)       |
| 5502        | CakSNP5502     | <i>Kabuli</i>    | <i>Ca_Kabuli_Chr04</i>       | 6077113                        | (G/T)       |
| 5503        | CakSNP5503     | <i>Kabuli</i>    | <i>Ca_Kabuli_Chr04</i>       | 6077156                        | (G/T)       |
| 5504        | CakSNP5504     | <i>Kabuli</i>    | <i>Ca_Kabuli_Chr04</i>       | 6077168                        | (T/C)       |
| 5505        | CakSNP5505     | <i>Kabuli</i>    | <i>Ca_Kabuli_Chr04</i>       | 6157625                        | (T/C)       |
| 5506        | CakSNP5506     | <i>Kabuli</i>    | <i>Ca_Kabuli_Chr04</i>       | 6201137                        | (T/C)       |
| 5507        | CakSNP5507     | <i>Kabuli</i>    | <i>Ca_Kabuli_Chr04</i>       | 6238354                        | (G/A)       |
| 5508        | CakSNP5508     | <i>Kabuli</i>    | <i>Ca_Kabuli_Chr04</i>       | 6238367                        | (T/A)       |
| 5509        | CakSNP5509     | <i>Kabuli</i>    | <i>Ca_Kabuli_Chr04</i>       | 6238376                        | (A/G)       |
| 5510        | CakSNP5510     | <i>Kabuli</i>    | <i>Ca_Kabuli_Chr04</i>       | 6238414                        | (T/A)       |
| 5511        | CakSNP5511     | <i>Kabuli</i>    | <i>Ca_Kabuli_Chr04</i>       | 6277398                        | (C/T)       |
| 5512        | CakSNP5512     | <i>Kabuli</i>    | <i>Ca_Kabuli_Chr04</i>       | 6281228                        | (A/C)       |
| 5513        | CakSNP5513     | <i>Kabuli</i>    | <i>Ca_Kabuli_Chr04</i>       | 6296089                        | (G/T)       |
| 5514        | CakSNP5514     | <i>Kabuli</i>    | <i>Ca_Kabuli_Chr04</i>       | 6387938                        | (T/G)       |
| 5515        | CakSNP5515     | <i>Kabuli</i>    | <i>Ca_Kabuli_Chr04</i>       | 6403910                        | (A/C)       |
| 5516        | CakSNP5516     | <i>Kabuli</i>    | <i>Ca_Kabuli_Chr04</i>       | 6408543                        | (T/G)       |
| 5517        | CakSNP5517     | <i>Kabuli</i>    | <i>Ca_Kabuli_Chr04</i>       | 6415058                        | (A/T)       |
| 5518        | CakSNP5518     | <i>Kabuli</i>    | <i>Ca_Kabuli_Chr04</i>       | 6462228                        | (C/T)       |
| 5519        | CakSNP5519     | <i>Kabuli</i>    | <i>Ca_Kabuli_Chr04</i>       | 6507540                        | (G/A)       |
| 5520        | CakSNP5520     | <i>Kabuli</i>    | <i>Ca_Kabuli_Chr04</i>       | 6509701                        | (T/A)       |
| 5521        | CakSNP5521     | <i>Kabuli</i>    | <i>Ca_Kabuli_Chr04</i>       | 6509761                        | (C/A)       |
| 5522        | CakSNP5522     | <i>Kabuli</i>    | <i>Ca_Kabuli_Chr04</i>       | 6511977                        | (C/T)       |
| 5523        | CakSNP5523     | <i>Kabuli</i>    | <i>Ca_Kabuli_Chr04</i>       | 6512060                        | (A/T)       |
| 5524        | CakSNP5524     | <i>Kabuli</i>    | <i>Ca_Kabuli_Chr04</i>       | 6513321                        | (A/T)       |
| 5525        | CakSNP5525     | <i>Kabuli</i>    | <i>Ca_Kabuli_Chr04</i>       | 6513493                        | (C/T)       |
| 5526        | CakSNP5526     | <i>Kabuli</i>    | <i>Ca_Kabuli_Chr04</i>       | 6513576                        | (A/T)       |
| 5527        | CakSNP5527     | <i>Kabuli</i>    | <i>Ca_Kabuli_Chr04</i>       | 6544385                        | (G/A)       |
| 5528        | CakSNP5528     | <i>Kabuli</i>    | <i>Ca_Kabuli_Chr04</i>       | 6544342                        | (A/C)       |
| 5529        | CakSNP5529     | <i>Kabuli</i>    | <i>Ca_Kabuli_Chr04</i>       | 6544337                        | (A/C)       |
| 5530        | CakSNP5530     | <i>Kabuli</i>    | <i>Ca_Kabuli_Chr04</i>       | 6552776                        | (A/G)       |
| 5531        | CakSNP5531     | <i>Kabuli</i>    | <i>Ca_Kabuli_Chr04</i>       | 6562373                        | (T/A)       |
| 5532        | CakSNP5532     | <i>Kabuli</i>    | <i>Ca_Kabuli_Chr04</i>       | 6562391                        | (A/C)       |
| 5533        | CakSNP5533     | <i>Kabuli</i>    | <i>Ca_Kabuli_Chr04</i>       | 6562402                        | (G/C)       |
| 5534        | CakSNP5534     | <i>Kabuli</i>    | <i>Ca_Kabuli_Chr04</i>       | 6611820                        | (G/A)       |
| 5535        | CakSNP5535     | <i>Kabuli</i>    | <i>Ca_Kabuli_Chr04</i>       | 6616016                        | (C/T)       |
| 5536        | CakSNP5536     | <i>Kabuli</i>    | <i>Ca_Kabuli_Chr04</i>       | 6616071                        | (C/T)       |

| <b>S.N.</b> | <b>SNP IDs</b> | <b>Cultivars</b> | <b>Chromosomes/scaffolds</b> | <b>Physical positions (bp)</b> | <b>SNPs</b> |
|-------------|----------------|------------------|------------------------------|--------------------------------|-------------|
| 5537        | CakSNP5537     | <i>Kabuli</i>    | <i>Ca_Kabuli_Chr04</i>       | 6688218                        | (G/A)       |
| 5538        | CakSNP5538     | <i>Kabuli</i>    | <i>Ca_Kabuli_Chr04</i>       | 6715326                        | (C/T)       |
| 5539        | CakSNP5539     | <i>Kabuli</i>    | <i>Ca_Kabuli_Chr04</i>       | 6723103                        | (G/T)       |
| 5540        | CakSNP5540     | <i>Kabuli</i>    | <i>Ca_Kabuli_Chr04</i>       | 6749334                        | (A/G)       |
| 5541        | CakSNP5541     | <i>Kabuli</i>    | <i>Ca_Kabuli_Chr04</i>       | 6749481                        | (C/T)       |
| 5542        | CakSNP5542     | <i>Kabuli</i>    | <i>Ca_Kabuli_Chr04</i>       | 6749550                        | (G/A)       |
| 5543        | CakSNP5543     | <i>Kabuli</i>    | <i>Ca_Kabuli_Chr04</i>       | 6749522                        | (T/C)       |
| 5544        | CakSNP5544     | <i>Kabuli</i>    | <i>Ca_Kabuli_Chr04</i>       | 6751549                        | (A/T)       |
| 5545        | CakSNP5545     | <i>Kabuli</i>    | <i>Ca_Kabuli_Chr04</i>       | 6761778                        | (C/A)       |
| 5546        | CakSNP5546     | <i>Kabuli</i>    | <i>Ca_Kabuli_Chr04</i>       | 6765922                        | (T/G)       |
| 5547        | CakSNP5547     | <i>Kabuli</i>    | <i>Ca_Kabuli_Chr04</i>       | 6765884                        | (T/C)       |
| 5548        | CakSNP5548     | <i>Kabuli</i>    | <i>Ca_Kabuli_Chr04</i>       | 6792858                        | (T/G)       |
| 5549        | CakSNP5549     | <i>Kabuli</i>    | <i>Ca_Kabuli_Chr04</i>       | 6801632                        | (C/A)       |
| 5550        | CakSNP5550     | <i>Kabuli</i>    | <i>Ca_Kabuli_Chr04</i>       | 6841854                        | (G/A)       |
| 5551        | CakSNP5551     | <i>Kabuli</i>    | <i>Ca_Kabuli_Chr04</i>       | 6841856                        | (G/A)       |
| 5552        | CakSNP5552     | <i>Kabuli</i>    | <i>Ca_Kabuli_Chr04</i>       | 6841858                        | (G/A)       |
| 5553        | CakSNP5553     | <i>Kabuli</i>    | <i>Ca_Kabuli_Chr04</i>       | 6841859                        | (A/C)       |
| 5554        | CakSNP5554     | <i>Kabuli</i>    | <i>Ca_Kabuli_Chr04</i>       | 6841860                        | (G/A)       |
| 5555        | CakSNP5555     | <i>Kabuli</i>    | <i>Ca_Kabuli_Chr04</i>       | 6841861                        | (A/C)       |
| 5556        | CakSNP5556     | <i>Kabuli</i>    | <i>Ca_Kabuli_Chr04</i>       | 6843659                        | (T/C)       |
| 5557        | CakSNP5557     | <i>Kabuli</i>    | <i>Ca_Kabuli_Chr04</i>       | 6852908                        | (T/C)       |
| 5558        | CakSNP5558     | <i>Kabuli</i>    | <i>Ca_Kabuli_Chr04</i>       | 6889964                        | (T/G)       |
| 5559        | CakSNP5559     | <i>Kabuli</i>    | <i>Ca_Kabuli_Chr04</i>       | 6889974                        | (T/G)       |
| 5560        | CakSNP5560     | <i>Kabuli</i>    | <i>Ca_Kabuli_Chr04</i>       | 6890000                        | (A/G)       |
| 5561        | CakSNP5561     | <i>Kabuli</i>    | <i>Ca_Kabuli_Chr04</i>       | 6890005                        | (C/T)       |
| 5562        | CakSNP5562     | <i>Kabuli</i>    | <i>Ca_Kabuli_Chr04</i>       | 6890014                        | (G/T)       |
| 5563        | CakSNP5563     | <i>Kabuli</i>    | <i>Ca_Kabuli_Chr04</i>       | 6889994                        | (T/G)       |
| 5564        | CakSNP5564     | <i>Kabuli</i>    | <i>Ca_Kabuli_Chr04</i>       | 6895804                        | (G/A)       |
| 5565        | CakSNP5565     | <i>Kabuli</i>    | <i>Ca_Kabuli_Chr04</i>       | 6919896                        | (C/T)       |
| 5566        | CakSNP5566     | <i>Kabuli</i>    | <i>Ca_Kabuli_Chr04</i>       | 6920068                        | (G/A)       |
| 5567        | CakSNP5567     | <i>Kabuli</i>    | <i>Ca_Kabuli_Chr04</i>       | 6931668                        | (T/A)       |
| 5568        | CakSNP5568     | <i>Kabuli</i>    | <i>Ca_Kabuli_Chr04</i>       | 6960336                        | (G/A)       |
| 5569        | CakSNP5569     | <i>Kabuli</i>    | <i>Ca_Kabuli_Chr04</i>       | 6969771                        | (G/T)       |
| 5570        | CakSNP5570     | <i>Kabuli</i>    | <i>Ca_Kabuli_Chr04</i>       | 6969799                        | (T/C)       |
| 5571        | CakSNP5571     | <i>Kabuli</i>    | <i>Ca_Kabuli_Chr04</i>       | 6970808                        | (A/G)       |
| 5572        | CakSNP5572     | <i>Kabuli</i>    | <i>Ca_Kabuli_Chr04</i>       | 6970800                        | (A/G)       |
| 5573        | CakSNP5573     | <i>Kabuli</i>    | <i>Ca_Kabuli_Chr04</i>       | 6970792                        | (T/A)       |
| 5574        | CakSNP5574     | <i>Kabuli</i>    | <i>Ca_Kabuli_Chr04</i>       | 6970781                        | (G/A)       |
| 5575        | CakSNP5575     | <i>Kabuli</i>    | <i>Ca_Kabuli_Chr04</i>       | 6970856                        | (T/C)       |



| <b>S.N.</b> | <b>SNP IDs</b> | <b>Cultivars</b> | <b>Chromosomes/scaffolds</b> | <b>Physical positions (bp)</b> | <b>SNPs</b> |
|-------------|----------------|------------------|------------------------------|--------------------------------|-------------|
| 5576        | CakSNP5576     | <i>Kabuli</i>    | <i>Ca_Kabuli_Chr04</i>       | 7013498                        | (A/G)       |
| 5577        | CakSNP5577     | <i>Kabuli</i>    | <i>Ca_Kabuli_Chr04</i>       | 7040229                        | (A/T)       |
| 5578        | CakSNP5578     | <i>Kabuli</i>    | <i>Ca_Kabuli_Chr04</i>       | 7142498                        | (G/A)       |
| 5579        | CakSNP5579     | <i>Kabuli</i>    | <i>Ca_Kabuli_Chr04</i>       | 7143207                        | (G/T)       |
| 5580        | CakSNP5580     | <i>Kabuli</i>    | <i>Ca_Kabuli_Chr04</i>       | 7143214                        | (T/C)       |
| 5581        | CakSNP5581     | <i>Kabuli</i>    | <i>Ca_Kabuli_Chr04</i>       | 7143238                        | (C/T)       |
| 5582        | CakSNP5582     | <i>Kabuli</i>    | <i>Ca_Kabuli_Chr04</i>       | 7155826                        | (G/A)       |
| 5583        | CakSNP5583     | <i>Kabuli</i>    | <i>Ca_Kabuli_Chr04</i>       | 7185974                        | (G/A)       |
| 5584        | CakSNP5584     | <i>Kabuli</i>    | <i>Ca_Kabuli_Chr04</i>       | 7231299                        | (C/T)       |
| 5585        | CakSNP5585     | <i>Kabuli</i>    | <i>Ca_Kabuli_Chr04</i>       | 7239917                        | (T/G)       |
| 5586        | CakSNP5586     | <i>Kabuli</i>    | <i>Ca_Kabuli_Chr04</i>       | 7244301                        | (G/A)       |
| 5587        | CakSNP5587     | <i>Kabuli</i>    | <i>Ca_Kabuli_Chr04</i>       | 7335587                        | (C/T)       |
| 5588        | CakSNP5588     | <i>Kabuli</i>    | <i>Ca_Kabuli_Chr04</i>       | 7349958                        | (T/C)       |
| 5589        | CakSNP5589     | <i>Kabuli</i>    | <i>Ca_Kabuli_Chr04</i>       | 7349948                        | (T/C)       |
| 5590        | CakSNP5590     | <i>Kabuli</i>    | <i>Ca_Kabuli_Chr04</i>       | 7349900                        | (G/A)       |
| 5591        | CakSNP5591     | <i>Kabuli</i>    | <i>Ca_Kabuli_Chr04</i>       | 7349885                        | (G/A)       |
| 5592        | CakSNP5592     | <i>Kabuli</i>    | <i>Ca_Kabuli_Chr04</i>       | 7350192                        | (G/T)       |
| 5593        | CakSNP5593     | <i>Kabuli</i>    | <i>Ca_Kabuli_Chr04</i>       | 7371667                        | (G/A)       |
| 5594        | CakSNP5594     | <i>Kabuli</i>    | <i>Ca_Kabuli_Chr04</i>       | 7371708                        | (T/C)       |
| 5595        | CakSNP5595     | <i>Kabuli</i>    | <i>Ca_Kabuli_Chr04</i>       | 7416949                        | (C/T)       |
| 5596        | CakSNP5596     | <i>Kabuli</i>    | <i>Ca_Kabuli_Chr04</i>       | 7496298                        | (A/G)       |
| 5597        | CakSNP5597     | <i>Kabuli</i>    | <i>Ca_Kabuli_Chr04</i>       | 7520182                        | (A/T)       |
| 5598        | CakSNP5598     | <i>Kabuli</i>    | <i>Ca_Kabuli_Chr04</i>       | 7520184                        | (A/C)       |
| 5599        | CakSNP5599     | <i>Kabuli</i>    | <i>Ca_Kabuli_Chr04</i>       | 7522047                        | (C/T)       |
| 5600        | CakSNP5600     | <i>Kabuli</i>    | <i>Ca_Kabuli_Chr04</i>       | 7522033                        | (A/G)       |
| 5601        | CakSNP5601     | <i>Kabuli</i>    | <i>Ca_Kabuli_Chr04</i>       | 7587317                        | (A/G)       |
| 5602        | CakSNP5602     | <i>Kabuli</i>    | <i>Ca_Kabuli_Chr04</i>       | 7587516                        | (T/C)       |
| 5603        | CakSNP5603     | <i>Kabuli</i>    | <i>Ca_Kabuli_Chr04</i>       | 7598474                        | (G/C)       |
| 5604        | CakSNP5604     | <i>Kabuli</i>    | <i>Ca_Kabuli_Chr04</i>       | 7699429                        | (C/T)       |
| 5605        | CakSNP5605     | <i>Kabuli</i>    | <i>Ca_Kabuli_Chr04</i>       | 7717770                        | (A/G)       |
| 5606        | CakSNP5606     | <i>Kabuli</i>    | <i>Ca_Kabuli_Chr04</i>       | 7717935                        | (T/G)       |
| 5607        | CakSNP5607     | <i>Kabuli</i>    | <i>Ca_Kabuli_Chr04</i>       | 7717978                        | (G/A)       |
| 5608        | CakSNP5608     | <i>Kabuli</i>    | <i>Ca_Kabuli_Chr04</i>       | 7718270                        | (T/C)       |
| 5609        | CakSNP5609     | <i>Kabuli</i>    | <i>Ca_Kabuli_Chr04</i>       | 7718277                        | (G/A)       |
| 5610        | CakSNP5610     | <i>Kabuli</i>    | <i>Ca_Kabuli_Chr04</i>       | 7739202                        | (C/T)       |
| 5611        | CakSNP5611     | <i>Kabuli</i>    | <i>Ca_Kabuli_Chr04</i>       | 7746230                        | (A/C)       |
| 5612        | CakSNP5612     | <i>Kabuli</i>    | <i>Ca_Kabuli_Chr04</i>       | 7746242                        | (C/G)       |
| 5613        | CakSNP5613     | <i>Kabuli</i>    | <i>Ca_Kabuli_Chr04</i>       | 7812468                        | (C/T)       |
| 5614        | CakSNP5614     | <i>Kabuli</i>    | <i>Ca_Kabuli_Chr04</i>       | 7812491                        | (T/A)       |

| <b>S.N.</b> | <b>SNP IDs</b> | <b>Cultivars</b> | <b>Chromosomes/scaffolds</b> | <b>Physical positions (bp)</b> | <b>SNPs</b> |
|-------------|----------------|------------------|------------------------------|--------------------------------|-------------|
| 5615        | CakSNP5615     | <i>Kabuli</i>    | <i>Ca_Kabuli_Chr04</i>       | 7812521                        | (A/G)       |
| 5616        | CakSNP5616     | <i>Kabuli</i>    | <i>Ca_Kabuli_Chr04</i>       | 7819865                        | (T/C)       |
| 5617        | CakSNP5617     | <i>Kabuli</i>    | <i>Ca_Kabuli_Chr04</i>       | 7821269                        | (G/A)       |
| 5618        | CakSNP5618     | <i>Kabuli</i>    | <i>Ca_Kabuli_Chr04</i>       | 7868480                        | (A/T)       |
| 5619        | CakSNP5619     | <i>Kabuli</i>    | <i>Ca_Kabuli_Chr04</i>       | 7883707                        | (T/A)       |
| 5620        | CakSNP5620     | <i>Kabuli</i>    | <i>Ca_Kabuli_Chr04</i>       | 7892596                        | (A/C)       |
| 5621        | CakSNP5621     | <i>Kabuli</i>    | <i>Ca_Kabuli_Chr04</i>       | 7975577                        | (C/G)       |
| 5622        | CakSNP5622     | <i>Kabuli</i>    | <i>Ca_Kabuli_Chr04</i>       | 7975586                        | (T/G)       |
| 5623        | CakSNP5623     | <i>Kabuli</i>    | <i>Ca_Kabuli_Chr04</i>       | 7988367                        | (A/G)       |
| 5624        | CakSNP5624     | <i>Kabuli</i>    | <i>Ca_Kabuli_Chr04</i>       | 7988396                        | (C/T)       |
| 5625        | CakSNP5625     | <i>Kabuli</i>    | <i>Ca_Kabuli_Chr04</i>       | 7988399                        | (G/A)       |
| 5626        | CakSNP5626     | <i>Kabuli</i>    | <i>Ca_Kabuli_Chr04</i>       | 7988422                        | (T/G)       |
| 5627        | CakSNP5627     | <i>Kabuli</i>    | <i>Ca_Kabuli_Chr04</i>       | 7988444                        | (T/G)       |
| 5628        | CakSNP5628     | <i>Kabuli</i>    | <i>Ca_Kabuli_Chr04</i>       | 8025363                        | (T/C)       |
| 5629        | CakSNP5629     | <i>Kabuli</i>    | <i>Ca_Kabuli_Chr04</i>       | 8025348                        | (A/T)       |
| 5630        | CakSNP5630     | <i>Kabuli</i>    | <i>Ca_Kabuli_Chr04</i>       | 8025530                        | (A/G)       |
| 5631        | CakSNP5631     | <i>Kabuli</i>    | <i>Ca_Kabuli_Chr04</i>       | 8050770                        | (T/C)       |
| 5632        | CakSNP5632     | <i>Kabuli</i>    | <i>Ca_Kabuli_Chr04</i>       | 8051306                        | (T/C)       |
| 5633        | CakSNP5633     | <i>Kabuli</i>    | <i>Ca_Kabuli_Chr04</i>       | 8117401                        | (G/A)       |
| 5634        | CakSNP5634     | <i>Kabuli</i>    | <i>Ca_Kabuli_Chr04</i>       | 8178043                        | (G/A)       |
| 5635        | CakSNP5635     | <i>Kabuli</i>    | <i>Ca_Kabuli_Chr04</i>       | 8198702                        | (T/G)       |
| 5636        | CakSNP5636     | <i>Kabuli</i>    | <i>Ca_Kabuli_Chr04</i>       | 8203586                        | (C/T)       |
| 5637        | CakSNP5637     | <i>Kabuli</i>    | <i>Ca_Kabuli_Chr04</i>       | 8236449                        | (C/A)       |
| 5638        | CakSNP5638     | <i>Kabuli</i>    | <i>Ca_Kabuli_Chr04</i>       | 8237145                        | (C/T)       |
| 5639        | CakSNP5639     | <i>Kabuli</i>    | <i>Ca_Kabuli_Chr04</i>       | 8269099                        | (T/G)       |
| 5640        | CakSNP5640     | <i>Kabuli</i>    | <i>Ca_Kabuli_Chr04</i>       | 8269152                        | (C/T)       |
| 5641        | CakSNP5641     | <i>Kabuli</i>    | <i>Ca_Kabuli_Chr04</i>       | 8269347                        | (C/G)       |
| 5642        | CakSNP5642     | <i>Kabuli</i>    | <i>Ca_Kabuli_Chr04</i>       | 8302198                        | (A/G)       |
| 5643        | CakSNP5643     | <i>Kabuli</i>    | <i>Ca_Kabuli_Chr04</i>       | 8383890                        | (G/A)       |
| 5644        | CakSNP5644     | <i>Kabuli</i>    | <i>Ca_Kabuli_Chr04</i>       | 8396861                        | (T/A)       |
| 5645        | CakSNP5645     | <i>Kabuli</i>    | <i>Ca_Kabuli_Chr04</i>       | 8396837                        | (T/G)       |
| 5646        | CakSNP5646     | <i>Kabuli</i>    | <i>Ca_Kabuli_Chr04</i>       | 8401109                        | (A/G)       |
| 5647        | CakSNP5647     | <i>Kabuli</i>    | <i>Ca_Kabuli_Chr04</i>       | 8401126                        | (G/T)       |
| 5648        | CakSNP5648     | <i>Kabuli</i>    | <i>Ca_Kabuli_Chr04</i>       | 8401143                        | (A/T)       |
| 5649        | CakSNP5649     | <i>Kabuli</i>    | <i>Ca_Kabuli_Chr04</i>       | 8401248                        | (T/A)       |
| 5650        | CakSNP5650     | <i>Kabuli</i>    | <i>Ca_Kabuli_Chr04</i>       | 8401230                        | (A/G)       |
| 5651        | CakSNP5651     | <i>Kabuli</i>    | <i>Ca_Kabuli_Chr04</i>       | 8404108                        | (T/C)       |
| 5652        | CakSNP5652     | <i>Kabuli</i>    | <i>Ca_Kabuli_Chr04</i>       | 8404165                        | (C/A)       |
| 5653        | CakSNP5653     | <i>Kabuli</i>    | <i>Ca_Kabuli_Chr04</i>       | 8404244                        | (C/G)       |

| <b>S.N.</b> | <b>SNP IDs</b> | <b>Cultivars</b> | <b>Chromosomes/scaffolds</b> | <b>Physical positions (bp)</b> | <b>SNPs</b> |
|-------------|----------------|------------------|------------------------------|--------------------------------|-------------|
| 5654        | CakSNP5654     | <i>Kabuli</i>    | <i>Ca_Kabuli_Chr04</i>       | 8471029                        | (G/A)       |
| 5655        | CakSNP5655     | <i>Kabuli</i>    | <i>Ca_Kabuli_Chr04</i>       | 8473120                        | (G/A)       |
| 5656        | CakSNP5656     | <i>Kabuli</i>    | <i>Ca_Kabuli_Chr04</i>       | 8473127                        | (G/A)       |
| 5657        | CakSNP5657     | <i>Kabuli</i>    | <i>Ca_Kabuli_Chr04</i>       | 8473294                        | (G/A)       |
| 5658        | CakSNP5658     | <i>Kabuli</i>    | <i>Ca_Kabuli_Chr04</i>       | 8473288                        | (A/G)       |
| 5659        | CakSNP5659     | <i>Kabuli</i>    | <i>Ca_Kabuli_Chr04</i>       | 8473246                        | (T/C)       |
| 5660        | CakSNP5660     | <i>Kabuli</i>    | <i>Ca_Kabuli_Chr04</i>       | 8474442                        | (C/T)       |
| 5661        | CakSNP5661     | <i>Kabuli</i>    | <i>Ca_Kabuli_Chr04</i>       | 8474441                        | (G/A)       |
| 5662        | CakSNP5662     | <i>Kabuli</i>    | <i>Ca_Kabuli_Chr04</i>       | 8474401                        | (T/A)       |
| 5663        | CakSNP5663     | <i>Kabuli</i>    | <i>Ca_Kabuli_Chr04</i>       | 8475634                        | (A/C)       |
| 5664        | CakSNP5664     | <i>Kabuli</i>    | <i>Ca_Kabuli_Chr04</i>       | 8483482                        | (T/C)       |
| 5665        | CakSNP5665     | <i>Kabuli</i>    | <i>Ca_Kabuli_Chr04</i>       | 8483494                        | (T/C)       |
| 5666        | CakSNP5666     | <i>Kabuli</i>    | <i>Ca_Kabuli_Chr04</i>       | 8484976                        | (G/A)       |
| 5667        | CakSNP5667     | <i>Kabuli</i>    | <i>Ca_Kabuli_Chr04</i>       | 8484978                        | (A/G)       |
| 5668        | CakSNP5668     | <i>Kabuli</i>    | <i>Ca_Kabuli_Chr04</i>       | 8496641                        | (C/A)       |
| 5669        | CakSNP5669     | <i>Kabuli</i>    | <i>Ca_Kabuli_Chr04</i>       | 8510011                        | (A/C)       |
| 5670        | CakSNP5670     | <i>Kabuli</i>    | <i>Ca_Kabuli_Chr04</i>       | 8512095                        | (G/A)       |
| 5671        | CakSNP5671     | <i>Kabuli</i>    | <i>Ca_Kabuli_Chr04</i>       | 8512280                        | (C/T)       |
| 5672        | CakSNP5672     | <i>Kabuli</i>    | <i>Ca_Kabuli_Chr04</i>       | 8518979                        | (G/A)       |
| 5673        | CakSNP5673     | <i>Kabuli</i>    | <i>Ca_Kabuli_Chr04</i>       | 8534120                        | (C/T)       |
| 5674        | CakSNP5674     | <i>Kabuli</i>    | <i>Ca_Kabuli_Chr04</i>       | 8567380                        | (A/T)       |
| 5675        | CakSNP5675     | <i>Kabuli</i>    | <i>Ca_Kabuli_Chr04</i>       | 8567431                        | (C/T)       |
| 5676        | CakSNP5676     | <i>Kabuli</i>    | <i>Ca_Kabuli_Chr04</i>       | 8567490                        | (C/A)       |
| 5677        | CakSNP5677     | <i>Kabuli</i>    | <i>Ca_Kabuli_Chr04</i>       | 8567478                        | (A/C)       |
| 5678        | CakSNP5678     | <i>Kabuli</i>    | <i>Ca_Kabuli_Chr04</i>       | 8567477                        | (T/C)       |
| 5679        | CakSNP5679     | <i>Kabuli</i>    | <i>Ca_Kabuli_Chr04</i>       | 8567465                        | (C/T)       |
| 5680        | CakSNP5680     | <i>Kabuli</i>    | <i>Ca_Kabuli_Chr04</i>       | 8570458                        | (T/G)       |
| 5681        | CakSNP5681     | <i>Kabuli</i>    | <i>Ca_Kabuli_Chr04</i>       | 8570501                        | (G/C)       |
| 5682        | CakSNP5682     | <i>Kabuli</i>    | <i>Ca_Kabuli_Chr04</i>       | 8595427                        | (C/T)       |
| 5683        | CakSNP5683     | <i>Kabuli</i>    | <i>Ca_Kabuli_Chr04</i>       | 8601364                        | (T/G)       |
| 5684        | CakSNP5684     | <i>Kabuli</i>    | <i>Ca_Kabuli_Chr04</i>       | 8659774                        | (G/A)       |
| 5685        | CakSNP5685     | <i>Kabuli</i>    | <i>Ca_Kabuli_Chr04</i>       | 8659935                        | (T/A)       |
| 5686        | CakSNP5686     | <i>Kabuli</i>    | <i>Ca_Kabuli_Chr04</i>       | 8659946                        | (C/T)       |
| 5687        | CakSNP5687     | <i>Kabuli</i>    | <i>Ca_Kabuli_Chr04</i>       | 8659985                        | (T/C)       |
| 5688        | CakSNP5688     | <i>Kabuli</i>    | <i>Ca_Kabuli_Chr04</i>       | 8660115                        | (A/T)       |
| 5689        | CakSNP5689     | <i>Kabuli</i>    | <i>Ca_Kabuli_Chr04</i>       | 8660136                        | (G/A)       |
| 5690        | CakSNP5690     | <i>Kabuli</i>    | <i>Ca_Kabuli_Chr04</i>       | 8660608                        | (G/T)       |
| 5691        | CakSNP5691     | <i>Kabuli</i>    | <i>Ca_Kabuli_Chr04</i>       | 8660599                        | (A/G)       |
| 5692        | CakSNP5692     | <i>Kabuli</i>    | <i>Ca_Kabuli_Chr04</i>       | 8668648                        | (G/A)       |

| <b>S.N.</b> | <b>SNP IDs</b> | <b>Cultivars</b> | <b>Chromosomes/scaffolds</b> | <b>Physical positions (bp)</b> | <b>SNPs</b> |
|-------------|----------------|------------------|------------------------------|--------------------------------|-------------|
| 5693        | CakSNP5693     | <i>Kabuli</i>    | <i>Ca_Kabuli_Chr04</i>       | 8668753                        | (A/G)       |
| 5694        | CakSNP5694     | <i>Kabuli</i>    | <i>Ca_Kabuli_Chr04</i>       | 8668945                        | (T/C)       |
| 5695        | CakSNP5695     | <i>Kabuli</i>    | <i>Ca_Kabuli_Chr04</i>       | 8669014                        | (C/G)       |
| 5696        | CakSNP5696     | <i>Kabuli</i>    | <i>Ca_Kabuli_Chr04</i>       | 8669104                        | (T/C)       |
| 5697        | CakSNP5697     | <i>Kabuli</i>    | <i>Ca_Kabuli_Chr04</i>       | 8669515                        | (C/T)       |
| 5698        | CakSNP5698     | <i>Kabuli</i>    | <i>Ca_Kabuli_Chr04</i>       | 8669513                        | (G/A)       |
| 5699        | CakSNP5699     | <i>Kabuli</i>    | <i>Ca_Kabuli_Chr04</i>       | 8669505                        | (G/T)       |
| 5700        | CakSNP5700     | <i>Kabuli</i>    | <i>Ca_Kabuli_Chr04</i>       | 8681949                        | (G/A)       |
| 5701        | CakSNP5701     | <i>Kabuli</i>    | <i>Ca_Kabuli_Chr04</i>       | 8695562                        | (C/T)       |
| 5702        | CakSNP5702     | <i>Kabuli</i>    | <i>Ca_Kabuli_Chr04</i>       | 8751638                        | (A/C)       |
| 5703        | CakSNP5703     | <i>Kabuli</i>    | <i>Ca_Kabuli_Chr04</i>       | 8751629                        | (T/C)       |
| 5704        | CakSNP5704     | <i>Kabuli</i>    | <i>Ca_Kabuli_Chr04</i>       | 8751618                        | (A/C)       |
| 5705        | CakSNP5705     | <i>Kabuli</i>    | <i>Ca_Kabuli_Chr04</i>       | 8751591                        | (A/C)       |
| 5706        | CakSNP5706     | <i>Kabuli</i>    | <i>Ca_Kabuli_Chr04</i>       | 8772215                        | (A/C)       |
| 5707        | CakSNP5707     | <i>Kabuli</i>    | <i>Ca_Kabuli_Chr04</i>       | 8782879                        | (G/C)       |
| 5708        | CakSNP5708     | <i>Kabuli</i>    | <i>Ca_Kabuli_Chr04</i>       | 8791654                        | (A/G)       |
| 5709        | CakSNP5709     | <i>Kabuli</i>    | <i>Ca_Kabuli_Chr04</i>       | 8805504                        | (A/G)       |
| 5710        | CakSNP5710     | <i>Kabuli</i>    | <i>Ca_Kabuli_Chr04</i>       | 8805578                        | (A/C)       |
| 5711        | CakSNP5711     | <i>Kabuli</i>    | <i>Ca_Kabuli_Chr04</i>       | 8805667                        | (C/T)       |
| 5712        | CakSNP5712     | <i>Kabuli</i>    | <i>Ca_Kabuli_Chr04</i>       | 8805867                        | (A/C)       |
| 5713        | CakSNP5713     | <i>Kabuli</i>    | <i>Ca_Kabuli_Chr04</i>       | 8805839                        | (G/A)       |
| 5714        | CakSNP5714     | <i>Kabuli</i>    | <i>Ca_Kabuli_Chr04</i>       | 8809032                        | (C/T)       |
| 5715        | CakSNP5715     | <i>Kabuli</i>    | <i>Ca_Kabuli_Chr04</i>       | 8809064                        | (T/C)       |
| 5716        | CakSNP5716     | <i>Kabuli</i>    | <i>Ca_Kabuli_Chr04</i>       | 8809010                        | (A/G)       |
| 5717        | CakSNP5717     | <i>Kabuli</i>    | <i>Ca_Kabuli_Chr04</i>       | 8809456                        | (A/C)       |
| 5718        | CakSNP5718     | <i>Kabuli</i>    | <i>Ca_Kabuli_Chr04</i>       | 8844846                        | (A/G)       |
| 5719        | CakSNP5719     | <i>Kabuli</i>    | <i>Ca_Kabuli_Chr04</i>       | 8848654                        | (C/T)       |
| 5720        | CakSNP5720     | <i>Kabuli</i>    | <i>Ca_Kabuli_Chr04</i>       | 8848653                        | (T/C)       |
| 5721        | CakSNP5721     | <i>Kabuli</i>    | <i>Ca_Kabuli_Chr04</i>       | 8852334                        | (T/A)       |
| 5722        | CakSNP5722     | <i>Kabuli</i>    | <i>Ca_Kabuli_Chr04</i>       | 8852420                        | (T/C)       |
| 5723        | CakSNP5723     | <i>Kabuli</i>    | <i>Ca_Kabuli_Chr04</i>       | 8873494                        | (G/T)       |
| 5724        | CakSNP5724     | <i>Kabuli</i>    | <i>Ca_Kabuli_Chr04</i>       | 8873509                        | (G/C)       |
| 5725        | CakSNP5725     | <i>Kabuli</i>    | <i>Ca_Kabuli_Chr04</i>       | 8919264                        | (C/T)       |
| 5726        | CakSNP5726     | <i>Kabuli</i>    | <i>Ca_Kabuli_Chr04</i>       | 8919300                        | (C/T)       |
| 5727        | CakSNP5727     | <i>Kabuli</i>    | <i>Ca_Kabuli_Chr04</i>       | 8919395                        | (A/G)       |
| 5728        | CakSNP5728     | <i>Kabuli</i>    | <i>Ca_Kabuli_Chr04</i>       | 8952236                        | (A/G)       |
| 5729        | CakSNP5729     | <i>Kabuli</i>    | <i>Ca_Kabuli_Chr04</i>       | 8985949                        | (C/T)       |
| 5730        | CakSNP5730     | <i>Kabuli</i>    | <i>Ca_Kabuli_Chr04</i>       | 8985961                        | (C/T)       |
| 5731        | CakSNP5731     | <i>Kabuli</i>    | <i>Ca_Kabuli_Chr04</i>       | 8986031                        | (T/A)       |

| <b>S.N.</b> | <b>SNP IDs</b> | <b>Cultivars</b> | <b>Chromosomes/scaffolds</b> | <b>Physical positions (bp)</b> | <b>SNPs</b> |
|-------------|----------------|------------------|------------------------------|--------------------------------|-------------|
| 5732        | CakSNP5732     | <i>Kabuli</i>    | <i>Ca_Kabuli_Chr04</i>       | 8986026                        | (T/A)       |
| 5733        | CakSNP5733     | <i>Kabuli</i>    | <i>Ca_Kabuli_Chr04</i>       | 8986024                        | (T/A)       |
| 5734        | CakSNP5734     | <i>Kabuli</i>    | <i>Ca_Kabuli_Chr04</i>       | 8986018                        | (G/A)       |
| 5735        | CakSNP5735     | <i>Kabuli</i>    | <i>Ca_Kabuli_Chr04</i>       | 8986008                        | (T/A)       |
| 5736        | CakSNP5736     | <i>Kabuli</i>    | <i>Ca_Kabuli_Chr04</i>       | 8986002                        | (T/A)       |
| 5737        | CakSNP5737     | <i>Kabuli</i>    | <i>Ca_Kabuli_Chr04</i>       | 8985998                        | (T/A)       |
| 5738        | CakSNP5738     | <i>Kabuli</i>    | <i>Ca_Kabuli_Chr04</i>       | 8985994                        | (C/A)       |
| 5739        | CakSNP5739     | <i>Kabuli</i>    | <i>Ca_Kabuli_Chr04</i>       | 8986207                        | (G/C)       |
| 5740        | CakSNP5740     | <i>Kabuli</i>    | <i>Ca_Kabuli_Chr04</i>       | 8986217                        | (T/A)       |
| 5741        | CakSNP5741     | <i>Kabuli</i>    | <i>Ca_Kabuli_Chr04</i>       | 9075398                        | (G/A)       |
| 5742        | CakSNP5742     | <i>Kabuli</i>    | <i>Ca_Kabuli_Chr04</i>       | 9075395                        | (A/G)       |
| 5743        | CakSNP5743     | <i>Kabuli</i>    | <i>Ca_Kabuli_Chr04</i>       | 9075459                        | (C/T)       |
| 5744        | CakSNP5744     | <i>Kabuli</i>    | <i>Ca_Kabuli_Chr04</i>       | 9075520                        | (C/T)       |
| 5745        | CakSNP5745     | <i>Kabuli</i>    | <i>Ca_Kabuli_Chr04</i>       | 9075565                        | (A/G)       |
| 5746        | CakSNP5746     | <i>Kabuli</i>    | <i>Ca_Kabuli_Chr04</i>       | 9075543                        | (T/C)       |
| 5747        | CakSNP5747     | <i>Kabuli</i>    | <i>Ca_Kabuli_Chr04</i>       | 9075671                        | (A/G)       |
| 5748        | CakSNP5748     | <i>Kabuli</i>    | <i>Ca_Kabuli_Chr04</i>       | 9075677                        | (T/C)       |
| 5749        | CakSNP5749     | <i>Kabuli</i>    | <i>Ca_Kabuli_Chr04</i>       | 9075682                        | (G/A)       |
| 5750        | CakSNP5750     | <i>Kabuli</i>    | <i>Ca_Kabuli_Chr04</i>       | 9075737                        | (G/A)       |
| 5751        | CakSNP5751     | <i>Kabuli</i>    | <i>Ca_Kabuli_Chr04</i>       | 9075744                        | (T/G)       |
| 5752        | CakSNP5752     | <i>Kabuli</i>    | <i>Ca_Kabuli_Chr04</i>       | 9187887                        | (G/C)       |
| 5753        | CakSNP5753     | <i>Kabuli</i>    | <i>Ca_Kabuli_Chr04</i>       | 9187973                        | (T/G)       |
| 5754        | CakSNP5754     | <i>Kabuli</i>    | <i>Ca_Kabuli_Chr04</i>       | 9189976                        | (T/A)       |
| 5755        | CakSNP5755     | <i>Kabuli</i>    | <i>Ca_Kabuli_Chr04</i>       | 9211570                        | (A/G)       |
| 5756        | CakSNP5756     | <i>Kabuli</i>    | <i>Ca_Kabuli_Chr04</i>       | 9257131                        | (G/A)       |
| 5757        | CakSNP5757     | <i>Kabuli</i>    | <i>Ca_Kabuli_Chr04</i>       | 9331949                        | (C/T)       |
| 5758        | CakSNP5758     | <i>Kabuli</i>    | <i>Ca_Kabuli_Chr04</i>       | 9392373                        | (A/T)       |
| 5759        | CakSNP5759     | <i>Kabuli</i>    | <i>Ca_Kabuli_Chr04</i>       | 9392455                        | (A/G)       |
| 5760        | CakSNP5760     | <i>Kabuli</i>    | <i>Ca_Kabuli_Chr04</i>       | 9392427                        | (G/A)       |
| 5761        | CakSNP5761     | <i>Kabuli</i>    | <i>Ca_Kabuli_Chr04</i>       | 9427890                        | (T/G)       |
| 5762        | CakSNP5762     | <i>Kabuli</i>    | <i>Ca_Kabuli_Chr04</i>       | 9427892                        | (G/T)       |
| 5763        | CakSNP5763     | <i>Kabuli</i>    | <i>Ca_Kabuli_Chr04</i>       | 9427894                        | (A/C)       |
| 5764        | CakSNP5764     | <i>Kabuli</i>    | <i>Ca_Kabuli_Chr04</i>       | 9427964                        | (C/A)       |
| 5765        | CakSNP5765     | <i>Kabuli</i>    | <i>Ca_Kabuli_Chr04</i>       | 9451895                        | (T/A)       |
| 5766        | CakSNP5766     | <i>Kabuli</i>    | <i>Ca_Kabuli_Chr04</i>       | 9451850                        | (T/G)       |
| 5767        | CakSNP5767     | <i>Kabuli</i>    | <i>Ca_Kabuli_Chr04</i>       | 9491741                        | (A/T)       |
| 5768        | CakSNP5768     | <i>Kabuli</i>    | <i>Ca_Kabuli_Chr04</i>       | 9533658                        | (A/G)       |
| 5769        | CakSNP5769     | <i>Kabuli</i>    | <i>Ca_Kabuli_Chr04</i>       | 9533688                        | (T/G)       |
| 5770        | CakSNP5770     | <i>Kabuli</i>    | <i>Ca_Kabuli_Chr04</i>       | 9579383                        | (C/A)       |

| <b>S.N.</b> | <b>SNP IDs</b> | <b>Cultivars</b> | <b>Chromosomes/scaffolds</b> | <b>Physical positions (bp)</b> | <b>SNPs</b> |
|-------------|----------------|------------------|------------------------------|--------------------------------|-------------|
| 5771        | CakSNP5771     | Kabuli           | Ca_Kabuli_Ch04               | 9579393                        | (G/A)       |
| 5772        | CakSNP5772     | Kabuli           | Ca_Kabuli_Ch04               | 9579401                        | (G/T)       |
| 5773        | CakSNP5773     | Kabuli           | Ca_Kabuli_Ch04               | 9579519                        | (A/T)       |
| 5774        | CakSNP5774     | Kabuli           | Ca_Kabuli_Ch04               | 9579517                        | (T/C)       |
| 5775        | CakSNP5775     | Kabuli           | Ca_Kabuli_Ch04               | 9580341                        | (T/A)       |
| 5776        | CakSNP5776     | Kabuli           | Ca_Kabuli_Ch04               | 9580339                        | (T/G)       |
| 5777        | CakSNP5777     | Kabuli           | Ca_Kabuli_Ch04               | 9614897                        | (G/A)       |
| 5778        | CakSNP5778     | Kabuli           | Ca_Kabuli_Ch04               | 9614905                        | (C/A)       |
| 5779        | CakSNP5779     | Kabuli           | Ca_Kabuli_Ch04               | 9661685                        | (G/A)       |
| 5780        | CakSNP5780     | Kabuli           | Ca_Kabuli_Ch04               | 9670905                        | (C/T)       |
| 5781        | CakSNP5781     | Kabuli           | Ca_Kabuli_Ch04               | 9670996                        | (G/T)       |
| 5782        | CakSNP5782     | Kabuli           | Ca_Kabuli_Ch04               | 9671007                        | (G/T)       |
| 5783        | CakSNP5783     | Kabuli           | Ca_Kabuli_Ch04               | 9671089                        | (T/G)       |
| 5784        | CakSNP5784     | Kabuli           | Ca_Kabuli_Ch04               | 9706453                        | (T/G)       |
| 5785        | CakSNP5785     | Kabuli           | Ca_Kabuli_Ch04               | 9706480                        | (T/A)       |
| 5786        | CakSNP5786     | Kabuli           | Ca_Kabuli_Ch04               | 9706481                        | (A/C)       |
| 5787        | CakSNP5787     | Kabuli           | Ca_Kabuli_Ch04               | 9740099                        | (A/G)       |
| 5788        | CakSNP5788     | Kabuli           | Ca_Kabuli_Ch04               | 9800865                        | (C/T)       |
| 5789        | CakSNP5789     | Kabuli           | Ca_Kabuli_Ch04               | 9802603                        | (T/C)       |
| 5790        | CakSNP5790     | Kabuli           | Ca_Kabuli_Ch04               | 9836559                        | (G/T)       |
| 5791        | CakSNP5791     | Kabuli           | Ca_Kabuli_Ch04               | 9840763                        | (C/A)       |
| 5792        | CakSNP5792     | Kabuli           | Ca_Kabuli_Ch04               | 9840906                        | (A/C)       |
| 5793        | CakSNP5793     | Kabuli           | Ca_Kabuli_Ch04               | 9846321                        | (T/A)       |
| 5794        | CakSNP5794     | Kabuli           | Ca_Kabuli_Ch04               | 9947077                        | (A/G)       |
| 5795        | CakSNP5795     | Kabuli           | Ca_Kabuli_Ch04               | 9973728                        | (C/G)       |
| 5796        | CakSNP5796     | Kabuli           | Ca_Kabuli_Ch04               | 9976039                        | (C/T)       |
| 5797        | CakSNP5797     | Kabuli           | Ca_Kabuli_Ch04               | 9999907                        | (A/T)       |
| 5798        | CakSNP5798     | Kabuli           | Ca_Kabuli_Ch04               | 10007069                       | (A/G)       |
| 5799        | CakSNP5799     | Kabuli           | Ca_Kabuli_Ch04               | 10007151                       | (C/T)       |
| 5800        | CakSNP5800     | Kabuli           | Ca_Kabuli_Ch04               | 10007193                       | (T/A)       |
| 5801        | CakSNP5801     | Kabuli           | Ca_Kabuli_Ch04               | 10007332                       | (T/C)       |
| 5802        | CakSNP5802     | Kabuli           | Ca_Kabuli_Ch04               | 10007286                       | (C/T)       |
| 5803        | CakSNP5803     | Kabuli           | Ca_Kabuli_Ch04               | 10007372                       | (C/A)       |
| 5804        | CakSNP5804     | Kabuli           | Ca_Kabuli_Ch04               | 10009839                       | (G/A)       |
| 5805        | CakSNP5805     | Kabuli           | Ca_Kabuli_Ch04               | 10013120                       | (G/A)       |
| 5806        | CakSNP5806     | Kabuli           | Ca_Kabuli_Ch04               | 10013148                       | (G/T)       |
| 5807        | CakSNP5807     | Kabuli           | Ca_Kabuli_Ch04               | 10017467                       | (A/C)       |
| 5808        | CakSNP5808     | Kabuli           | Ca_Kabuli_Ch04               | 10024226                       | (G/A)       |
| 5809        | CakSNP5809     | Kabuli           | Ca_Kabuli_Ch04               | 10030134                       | (A/G)       |

| <b>S.N.</b> | <b>SNP IDs</b> | <b>Cultivars</b> | <b>Chromosomes/scaffolds</b> | <b>Physical positions (bp)</b> | <b>SNPs</b> |
|-------------|----------------|------------------|------------------------------|--------------------------------|-------------|
| 5810        | CakSNP5810     | <i>Kabuli</i>    | <i>Ca_Kabuli_Chr04</i>       | 10116516                       | (T/G)       |
| 5811        | CakSNP5811     | <i>Kabuli</i>    | <i>Ca_Kabuli_Chr04</i>       | 10151711                       | (A/C)       |
| 5812        | CakSNP5812     | <i>Kabuli</i>    | <i>Ca_Kabuli_Chr04</i>       | 10151943                       | (C/T)       |
| 5813        | CakSNP5813     | <i>Kabuli</i>    | <i>Ca_Kabuli_Chr04</i>       | 10184428                       | (G/T)       |
| 5814        | CakSNP5814     | <i>Kabuli</i>    | <i>Ca_Kabuli_Chr04</i>       | 10184427                       | (C/A)       |
| 5815        | CakSNP5815     | <i>Kabuli</i>    | <i>Ca_Kabuli_Chr04</i>       | 10185602                       | (T/G)       |
| 5816        | CakSNP5816     | <i>Kabuli</i>    | <i>Ca_Kabuli_Chr04</i>       | 10185625                       | (A/G)       |
| 5817        | CakSNP5817     | <i>Kabuli</i>    | <i>Ca_Kabuli_Chr04</i>       | 10205246                       | (C/T)       |
| 5818        | CakSNP5818     | <i>Kabuli</i>    | <i>Ca_Kabuli_Chr04</i>       | 10290706                       | (G/T)       |
| 5819        | CakSNP5819     | <i>Kabuli</i>    | <i>Ca_Kabuli_Chr04</i>       | 10293203                       | (T/C)       |
| 5820        | CakSNP5820     | <i>Kabuli</i>    | <i>Ca_Kabuli_Chr04</i>       | 10293241                       | (C/G)       |
| 5821        | CakSNP5821     | <i>Kabuli</i>    | <i>Ca_Kabuli_Chr04</i>       | 10294380                       | (A/G)       |
| 5822        | CakSNP5822     | <i>Kabuli</i>    | <i>Ca_Kabuli_Chr04</i>       | 10305276                       | (G/A)       |
| 5823        | CakSNP5823     | <i>Kabuli</i>    | <i>Ca_Kabuli_Chr04</i>       | 10305235                       | (A/G)       |
| 5824        | CakSNP5824     | <i>Kabuli</i>    | <i>Ca_Kabuli_Chr04</i>       | 10305285                       | (C/A)       |
| 5825        | CakSNP5825     | <i>Kabuli</i>    | <i>Ca_Kabuli_Chr04</i>       | 10411809                       | (G/A)       |
| 5826        | CakSNP5826     | <i>Kabuli</i>    | <i>Ca_Kabuli_Chr04</i>       | 10422142                       | (A/T)       |
| 5827        | CakSNP5827     | <i>Kabuli</i>    | <i>Ca_Kabuli_Chr04</i>       | 10422469                       | (C/A)       |
| 5828        | CakSNP5828     | <i>Kabuli</i>    | <i>Ca_Kabuli_Chr04</i>       | 10430622                       | (A/C)       |
| 5829        | CakSNP5829     | <i>Kabuli</i>    | <i>Ca_Kabuli_Chr04</i>       | 10430617                       | (A/C)       |
| 5830        | CakSNP5830     | <i>Kabuli</i>    | <i>Ca_Kabuli_Chr04</i>       | 10430613                       | (C/A)       |
| 5831        | CakSNP5831     | <i>Kabuli</i>    | <i>Ca_Kabuli_Chr04</i>       | 10430603                       | (G/A)       |
| 5832        | CakSNP5832     | <i>Kabuli</i>    | <i>Ca_Kabuli_Chr04</i>       | 10430595                       | (A/C)       |
| 5833        | CakSNP5833     | <i>Kabuli</i>    | <i>Ca_Kabuli_Chr04</i>       | 10430588                       | (T/C)       |
| 5834        | CakSNP5834     | <i>Kabuli</i>    | <i>Ca_Kabuli_Chr04</i>       | 10430574                       | (A/T)       |
| 5835        | CakSNP5835     | <i>Kabuli</i>    | <i>Ca_Kabuli_Chr04</i>       | 10464927                       | (T/G)       |
| 5836        | CakSNP5836     | <i>Kabuli</i>    | <i>Ca_Kabuli_Chr04</i>       | 10465328                       | (T/C)       |
| 5837        | CakSNP5837     | <i>Kabuli</i>    | <i>Ca_Kabuli_Chr04</i>       | 10547575                       | (G/A)       |
| 5838        | CakSNP5838     | <i>Kabuli</i>    | <i>Ca_Kabuli_Chr04</i>       | 10547561                       | (T/C)       |
| 5839        | CakSNP5839     | <i>Kabuli</i>    | <i>Ca_Kabuli_Chr04</i>       | 10642002                       | (A/G)       |
| 5840        | CakSNP5840     | <i>Kabuli</i>    | <i>Ca_Kabuli_Chr04</i>       | 10642043                       | (T/G)       |
| 5841        | CakSNP5841     | <i>Kabuli</i>    | <i>Ca_Kabuli_Chr04</i>       | 10642044                       | (A/T)       |
| 5842        | CakSNP5842     | <i>Kabuli</i>    | <i>Ca_Kabuli_Chr04</i>       | 10643339                       | (T/A)       |
| 5843        | CakSNP5843     | <i>Kabuli</i>    | <i>Ca_Kabuli_Chr04</i>       | 10643331                       | (T/A)       |
| 5844        | CakSNP5844     | <i>Kabuli</i>    | <i>Ca_Kabuli_Chr04</i>       | 10644245                       | (G/A)       |
| 5845        | CakSNP5845     | <i>Kabuli</i>    | <i>Ca_Kabuli_Chr04</i>       | 10670664                       | (C/A)       |
| 5846        | CakSNP5846     | <i>Kabuli</i>    | <i>Ca_Kabuli_Chr04</i>       | 10699624                       | (A/T)       |
| 5847        | CakSNP5847     | <i>Kabuli</i>    | <i>Ca_Kabuli_Chr04</i>       | 10780990                       | (A/G)       |
| 5848        | CakSNP5848     | <i>Kabuli</i>    | <i>Ca_Kabuli_Chr04</i>       | 10807993                       | (T/C)       |

| <b>S.N.</b> | <b>SNP IDs</b> | <b>Cultivars</b> | <b>Chromosomes/scaffolds</b> | <b>Physical positions (bp)</b> | <b>SNPs</b> |
|-------------|----------------|------------------|------------------------------|--------------------------------|-------------|
| 5849        | CakSNP5849     | <i>Kabuli</i>    | <i>Ca_Kabuli_Chr04</i>       | 10827485                       | (G/A)       |
| 5850        | CakSNP5850     | <i>Kabuli</i>    | <i>Ca_Kabuli_Chr04</i>       | 10827515                       | (C/G)       |
| 5851        | CakSNP5851     | <i>Kabuli</i>    | <i>Ca_Kabuli_Chr04</i>       | 10901282                       | (T/C)       |
| 5852        | CakSNP5852     | <i>Kabuli</i>    | <i>Ca_Kabuli_Chr04</i>       | 10917723                       | (T/C)       |
| 5853        | CakSNP5853     | <i>Kabuli</i>    | <i>Ca_Kabuli_Chr04</i>       | 10917717                       | (C/G)       |
| 5854        | CakSNP5854     | <i>Kabuli</i>    | <i>Ca_Kabuli_Chr04</i>       | 10925490                       | (G/A)       |
| 5855        | CakSNP5855     | <i>Kabuli</i>    | <i>Ca_Kabuli_Chr04</i>       | 10928923                       | (T/C)       |
| 5856        | CakSNP5856     | <i>Kabuli</i>    | <i>Ca_Kabuli_Chr04</i>       | 10950823                       | (C/T)       |
| 5857        | CakSNP5857     | <i>Kabuli</i>    | <i>Ca_Kabuli_Chr04</i>       | 10971039                       | (C/A)       |
| 5858        | CakSNP5858     | <i>Kabuli</i>    | <i>Ca_Kabuli_Chr04</i>       | 10990000                       | (T/C)       |
| 5859        | CakSNP5859     | <i>Kabuli</i>    | <i>Ca_Kabuli_Chr04</i>       | 10990008                       | (A/T)       |
| 5860        | CakSNP5860     | <i>Kabuli</i>    | <i>Ca_Kabuli_Chr04</i>       | 10990049                       | (G/T)       |
| 5861        | CakSNP5861     | <i>Kabuli</i>    | <i>Ca_Kabuli_Chr04</i>       | 10990058                       | (T/C)       |
| 5862        | CakSNP5862     | <i>Kabuli</i>    | <i>Ca_Kabuli_Chr04</i>       | 10990265                       | (T/A)       |
| 5863        | CakSNP5863     | <i>Kabuli</i>    | <i>Ca_Kabuli_Chr04</i>       | 10990261                       | (A/G)       |
| 5864        | CakSNP5864     | <i>Kabuli</i>    | <i>Ca_Kabuli_Chr04</i>       | 10991842                       | (G/A)       |
| 5865        | CakSNP5865     | <i>Kabuli</i>    | <i>Ca_Kabuli_Chr04</i>       | 10991910                       | (C/T)       |
| 5866        | CakSNP5866     | <i>Kabuli</i>    | <i>Ca_Kabuli_Chr04</i>       | 11040108                       | (C/T)       |
| 5867        | CakSNP5867     | <i>Kabuli</i>    | <i>Ca_Kabuli_Chr04</i>       | 11051335                       | (C/T)       |
| 5868        | CakSNP5868     | <i>Kabuli</i>    | <i>Ca_Kabuli_Chr04</i>       | 11059403                       | (T/G)       |
| 5869        | CakSNP5869     | <i>Kabuli</i>    | <i>Ca_Kabuli_Chr04</i>       | 11059404                       | (T/G)       |
| 5870        | CakSNP5870     | <i>Kabuli</i>    | <i>Ca_Kabuli_Chr04</i>       | 11059414                       | (T/G)       |
| 5871        | CakSNP5871     | <i>Kabuli</i>    | <i>Ca_Kabuli_Chr04</i>       | 11059572                       | (G/A)       |
| 5872        | CakSNP5872     | <i>Kabuli</i>    | <i>Ca_Kabuli_Chr04</i>       | 11059540                       | (T/C)       |
| 5873        | CakSNP5873     | <i>Kabuli</i>    | <i>Ca_Kabuli_Chr04</i>       | 11096124                       | (A/G)       |
| 5874        | CakSNP5874     | <i>Kabuli</i>    | <i>Ca_Kabuli_Chr04</i>       | 11096225                       | (A/G)       |
| 5875        | CakSNP5875     | <i>Kabuli</i>    | <i>Ca_Kabuli_Chr04</i>       | 11096290                       | (G/A)       |
| 5876        | CakSNP5876     | <i>Kabuli</i>    | <i>Ca_Kabuli_Chr04</i>       | 11113277                       | (A/C)       |
| 5877        | CakSNP5877     | <i>Kabuli</i>    | <i>Ca_Kabuli_Chr04</i>       | 11114238                       | (T/C)       |
| 5878        | CakSNP5878     | <i>Kabuli</i>    | <i>Ca_Kabuli_Chr04</i>       | 11142202                       | (A/G)       |
| 5879        | CakSNP5879     | <i>Kabuli</i>    | <i>Ca_Kabuli_Chr04</i>       | 11142227                       | (C/T)       |
| 5880        | CakSNP5880     | <i>Kabuli</i>    | <i>Ca_Kabuli_Chr04</i>       | 11196803                       | (T/G)       |
| 5881        | CakSNP5881     | <i>Kabuli</i>    | <i>Ca_Kabuli_Chr04</i>       | 11230403                       | (G/T)       |
| 5882        | CakSNP5882     | <i>Kabuli</i>    | <i>Ca_Kabuli_Chr04</i>       | 11230400                       | (T/A)       |
| 5883        | CakSNP5883     | <i>Kabuli</i>    | <i>Ca_Kabuli_Chr04</i>       | 11230397                       | (G/C)       |
| 5884        | CakSNP5884     | <i>Kabuli</i>    | <i>Ca_Kabuli_Chr04</i>       | 11231142                       | (A/G)       |
| 5885        | CakSNP5885     | <i>Kabuli</i>    | <i>Ca_Kabuli_Chr04</i>       | 11231137                       | (A/G)       |
| 5886        | CakSNP5886     | <i>Kabuli</i>    | <i>Ca_Kabuli_Chr04</i>       | 11231135                       | (C/T)       |
| 5887        | CakSNP5887     | <i>Kabuli</i>    | <i>Ca_Kabuli_Chr04</i>       | 11244334                       | (T/G)       |



| <b>S.N.</b> | <b>SNP IDs</b> | <b>Cultivars</b> | <b>Chromosomes/scaffolds</b> | <b>Physical positions (bp)</b> | <b>SNPs</b> |
|-------------|----------------|------------------|------------------------------|--------------------------------|-------------|
| 5888        | CakSNP5888     | <i>Kabuli</i>    | <i>Ca_Kabuli_Chr04</i>       | 11244395                       | (G/T)       |
| 5889        | CakSNP5889     | <i>Kabuli</i>    | <i>Ca_Kabuli_Chr04</i>       | 11246093                       | (G/A)       |
| 5890        | CakSNP5890     | <i>Kabuli</i>    | <i>Ca_Kabuli_Chr04</i>       | 11246173                       | (C/T)       |
| 5891        | CakSNP5891     | <i>Kabuli</i>    | <i>Ca_Kabuli_Chr04</i>       | 11246164                       | (G/A)       |
| 5892        | CakSNP5892     | <i>Kabuli</i>    | <i>Ca_Kabuli_Chr04</i>       | 11273328                       | (T/C)       |
| 5893        | CakSNP5893     | <i>Kabuli</i>    | <i>Ca_Kabuli_Chr04</i>       | 11273405                       | (A/T)       |
| 5894        | CakSNP5894     | <i>Kabuli</i>    | <i>Ca_Kabuli_Chr04</i>       | 11274281                       | (T/C)       |
| 5895        | CakSNP5895     | <i>Kabuli</i>    | <i>Ca_Kabuli_Chr04</i>       | 11275171                       | (T/C)       |
| 5896        | CakSNP5896     | <i>Kabuli</i>    | <i>Ca_Kabuli_Chr04</i>       | 11276413                       | (C/G)       |
| 5897        | CakSNP5897     | <i>Kabuli</i>    | <i>Ca_Kabuli_Chr04</i>       | 11276484                       | (T/C)       |
| 5898        | CakSNP5898     | <i>Kabuli</i>    | <i>Ca_Kabuli_Chr04</i>       | 11277138                       | (A/G)       |
| 5899        | CakSNP5899     | <i>Kabuli</i>    | <i>Ca_Kabuli_Chr04</i>       | 11277297                       | (G/A)       |
| 5900        | CakSNP5900     | <i>Kabuli</i>    | <i>Ca_Kabuli_Chr04</i>       | 11277574                       | (G/C)       |
| 5901        | CakSNP5901     | <i>Kabuli</i>    | <i>Ca_Kabuli_Chr04</i>       | 11334350                       | (A/G)       |
| 5902        | CakSNP5902     | <i>Kabuli</i>    | <i>Ca_Kabuli_Chr04</i>       | 11334343                       | (A/T)       |
| 5903        | CakSNP5903     | <i>Kabuli</i>    | <i>Ca_Kabuli_Chr04</i>       | 11343257                       | (T/C)       |
| 5904        | CakSNP5904     | <i>Kabuli</i>    | <i>Ca_Kabuli_Chr04</i>       | 11343230                       | (G/C)       |
| 5905        | CakSNP5905     | <i>Kabuli</i>    | <i>Ca_Kabuli_Chr04</i>       | 11379077                       | (T/C)       |
| 5906        | CakSNP5906     | <i>Kabuli</i>    | <i>Ca_Kabuli_Chr04</i>       | 11398699                       | (A/G)       |
| 5907        | CakSNP5907     | <i>Kabuli</i>    | <i>Ca_Kabuli_Chr04</i>       | 11398682                       | (G/A)       |
| 5908        | CakSNP5908     | <i>Kabuli</i>    | <i>Ca_Kabuli_Chr04</i>       | 11398889                       | (A/G)       |
| 5909        | CakSNP5909     | <i>Kabuli</i>    | <i>Ca_Kabuli_Chr04</i>       | 11414506                       | (C/T)       |
| 5910        | CakSNP5910     | <i>Kabuli</i>    | <i>Ca_Kabuli_Chr04</i>       | 11435651                       | (A/G)       |
| 5911        | CakSNP5911     | <i>Kabuli</i>    | <i>Ca_Kabuli_Chr04</i>       | 11441604                       | (T/A)       |
| 5912        | CakSNP5912     | <i>Kabuli</i>    | <i>Ca_Kabuli_Chr04</i>       | 11441615                       | (T/C)       |
| 5913        | CakSNP5913     | <i>Kabuli</i>    | <i>Ca_Kabuli_Chr04</i>       | 11441619                       | (G/A)       |
| 5914        | CakSNP5914     | <i>Kabuli</i>    | <i>Ca_Kabuli_Chr04</i>       | 11441655                       | (T/A)       |
| 5915        | CakSNP5915     | <i>Kabuli</i>    | <i>Ca_Kabuli_Chr04</i>       | 11441707                       | (A/C)       |
| 5916        | CakSNP5916     | <i>Kabuli</i>    | <i>Ca_Kabuli_Chr04</i>       | 11465057                       | (C/G)       |
| 5917        | CakSNP5917     | <i>Kabuli</i>    | <i>Ca_Kabuli_Chr04</i>       | 11465075                       | (T/C)       |
| 5918        | CakSNP5918     | <i>Kabuli</i>    | <i>Ca_Kabuli_Chr04</i>       | 11465113                       | (C/T)       |
| 5919        | CakSNP5919     | <i>Kabuli</i>    | <i>Ca_Kabuli_Chr04</i>       | 11490100                       | (C/T)       |
| 5920        | CakSNP5920     | <i>Kabuli</i>    | <i>Ca_Kabuli_Chr04</i>       | 11490154                       | (A/T)       |
| 5921        | CakSNP5921     | <i>Kabuli</i>    | <i>Ca_Kabuli_Chr04</i>       | 11490125                       | (G/T)       |
| 5922        | CakSNP5922     | <i>Kabuli</i>    | <i>Ca_Kabuli_Chr04</i>       | 11490496                       | (G/A)       |
| 5923        | CakSNP5923     | <i>Kabuli</i>    | <i>Ca_Kabuli_Chr04</i>       | 11517582                       | (C/T)       |
| 5924        | CakSNP5924     | <i>Kabuli</i>    | <i>Ca_Kabuli_Chr04</i>       | 11517517                       | (C/A)       |
| 5925        | CakSNP5925     | <i>Kabuli</i>    | <i>Ca_Kabuli_Chr04</i>       | 11572051                       | (C/T)       |
| 5926        | CakSNP5926     | <i>Kabuli</i>    | <i>Ca_Kabuli_Chr04</i>       | 11645738                       | (A/G)       |

| <b>S.N.</b> | <b>SNP IDs</b> | <b>Cultivars</b> | <b>Chromosomes/scaffolds</b> | <b>Physical positions (bp)</b> | <b>SNPs</b> |
|-------------|----------------|------------------|------------------------------|--------------------------------|-------------|
| 5927        | CakSNP5927     | <i>Kabuli</i>    | <i>Ca_Kabuli_Chr04</i>       | 11646347                       | (C/G)       |
| 5928        | CakSNP5928     | <i>Kabuli</i>    | <i>Ca_Kabuli_Chr04</i>       | 11646453                       | (G/A)       |
| 5929        | CakSNP5929     | <i>Kabuli</i>    | <i>Ca_Kabuli_Chr04</i>       | 11658323                       | (A/G)       |
| 5930        | CakSNP5930     | <i>Kabuli</i>    | <i>Ca_Kabuli_Chr04</i>       | 11658314                       | (A/G)       |
| 5931        | CakSNP5931     | <i>Kabuli</i>    | <i>Ca_Kabuli_Chr04</i>       | 11689611                       | (C/T)       |
| 5932        | CakSNP5932     | <i>Kabuli</i>    | <i>Ca_Kabuli_Chr04</i>       | 11689647                       | (T/C)       |
| 5933        | CakSNP5933     | <i>Kabuli</i>    | <i>Ca_Kabuli_Chr04</i>       | 11752862                       | (A/G)       |
| 5934        | CakSNP5934     | <i>Kabuli</i>    | <i>Ca_Kabuli_Chr04</i>       | 11752855                       | (A/G)       |
| 5935        | CakSNP5935     | <i>Kabuli</i>    | <i>Ca_Kabuli_Chr04</i>       | 11772023                       | (G/T)       |
| 5936        | CakSNP5936     | <i>Kabuli</i>    | <i>Ca_Kabuli_Chr04</i>       | 11838005                       | (C/T)       |
| 5937        | CakSNP5937     | <i>Kabuli</i>    | <i>Ca_Kabuli_Chr04</i>       | 11852291                       | (A/G)       |
| 5938        | CakSNP5938     | <i>Kabuli</i>    | <i>Ca_Kabuli_Chr04</i>       | 11926352                       | (G/C)       |
| 5939        | CakSNP5939     | <i>Kabuli</i>    | <i>Ca_Kabuli_Chr04</i>       | 11985628                       | (G/A)       |
| 5940        | CakSNP5940     | <i>Kabuli</i>    | <i>Ca_Kabuli_Chr04</i>       | 11985604                       | (C/T)       |
| 5941        | CakSNP5941     | <i>Kabuli</i>    | <i>Ca_Kabuli_Chr04</i>       | 12004082                       | (A/T)       |
| 5942        | CakSNP5942     | <i>Kabuli</i>    | <i>Ca_Kabuli_Chr04</i>       | 12004209                       | (C/T)       |
| 5943        | CakSNP5943     | <i>Kabuli</i>    | <i>Ca_Kabuli_Chr04</i>       | 12004205                       | (A/C)       |
| 5944        | CakSNP5944     | <i>Kabuli</i>    | <i>Ca_Kabuli_Chr04</i>       | 12023137                       | (A/T)       |
| 5945        | CakSNP5945     | <i>Kabuli</i>    | <i>Ca_Kabuli_Chr04</i>       | 12023215                       | (G/A)       |
| 5946        | CakSNP5946     | <i>Kabuli</i>    | <i>Ca_Kabuli_Chr04</i>       | 12045899                       | (T/A)       |
| 5947        | CakSNP5947     | <i>Kabuli</i>    | <i>Ca_Kabuli_Chr04</i>       | 12045903                       | (C/A)       |
| 5948        | CakSNP5948     | <i>Kabuli</i>    | <i>Ca_Kabuli_Chr04</i>       | 12045906                       | (C/A)       |
| 5949        | CakSNP5949     | <i>Kabuli</i>    | <i>Ca_Kabuli_Chr04</i>       | 12045910                       | (G/A)       |
| 5950        | CakSNP5950     | <i>Kabuli</i>    | <i>Ca_Kabuli_Chr04</i>       | 12070990                       | (T/A)       |
| 5951        | CakSNP5951     | <i>Kabuli</i>    | <i>Ca_Kabuli_Chr04</i>       | 12070994                       | (C/A)       |
| 5952        | CakSNP5952     | <i>Kabuli</i>    | <i>Ca_Kabuli_Chr04</i>       | 12070997                       | (C/A)       |
| 5953        | CakSNP5953     | <i>Kabuli</i>    | <i>Ca_Kabuli_Chr04</i>       | 12071001                       | (G/A)       |
| 5954        | CakSNP5954     | <i>Kabuli</i>    | <i>Ca_Kabuli_Chr04</i>       | 12167328                       | (A/G)       |
| 5955        | CakSNP5955     | <i>Kabuli</i>    | <i>Ca_Kabuli_Chr04</i>       | 12167568                       | (G/A)       |
| 5956        | CakSNP5956     | <i>Kabuli</i>    | <i>Ca_Kabuli_Chr04</i>       | 12212917                       | (G/A)       |
| 5957        | CakSNP5957     | <i>Kabuli</i>    | <i>Ca_Kabuli_Chr04</i>       | 12213071                       | (C/A)       |
| 5958        | CakSNP5958     | <i>Kabuli</i>    | <i>Ca_Kabuli_Chr04</i>       | 12213046                       | (T/C)       |
| 5959        | CakSNP5959     | <i>Kabuli</i>    | <i>Ca_Kabuli_Chr04</i>       | 12234358                       | (C/A)       |
| 5960        | CakSNP5960     | <i>Kabuli</i>    | <i>Ca_Kabuli_Chr04</i>       | 12249494                       | (T/C)       |
| 5961        | CakSNP5961     | <i>Kabuli</i>    | <i>Ca_Kabuli_Chr04</i>       | 12251184                       | (G/A)       |
| 5962        | CakSNP5962     | <i>Kabuli</i>    | <i>Ca_Kabuli_Chr04</i>       | 12274290                       | (A/T)       |
| 5963        | CakSNP5963     | <i>Kabuli</i>    | <i>Ca_Kabuli_Chr04</i>       | 12316847                       | (T/C)       |
| 5964        | CakSNP5964     | <i>Kabuli</i>    | <i>Ca_Kabuli_Chr04</i>       | 12431895                       | (C/T)       |
| 5965        | CakSNP5965     | <i>Kabuli</i>    | <i>Ca_Kabuli_Chr04</i>       | 12431915                       | (A/G)       |

| <b>S.N.</b> | <b>SNP IDs</b> | <b>Cultivars</b> | <b>Chromosomes/scaffolds</b> | <b>Physical positions (bp)</b> | <b>SNPs</b> |
|-------------|----------------|------------------|------------------------------|--------------------------------|-------------|
| 5966        | CakSNP5966     | <i>Kabuli</i>    | <i>Ca_Kabuli_Chr04</i>       | 12484911                       | (A/T)       |
| 5967        | CakSNP5967     | <i>Kabuli</i>    | <i>Ca_Kabuli_Chr04</i>       | 12506440                       | (A/G)       |
| 5968        | CakSNP5968     | <i>Kabuli</i>    | <i>Ca_Kabuli_Chr04</i>       | 12506450                       | (T/A)       |
| 5969        | CakSNP5969     | <i>Kabuli</i>    | <i>Ca_Kabuli_Chr04</i>       | 12514728                       | (G/A)       |
| 5970        | CakSNP5970     | <i>Kabuli</i>    | <i>Ca_Kabuli_Chr04</i>       | 12514726                       | (C/T)       |
| 5971        | CakSNP5971     | <i>Kabuli</i>    | <i>Ca_Kabuli_Chr04</i>       | 12514724                       | (T/C)       |
| 5972        | CakSNP5972     | <i>Kabuli</i>    | <i>Ca_Kabuli_Chr04</i>       | 12514706                       | (G/A)       |
| 5973        | CakSNP5973     | <i>Kabuli</i>    | <i>Ca_Kabuli_Chr04</i>       | 12525328                       | (A/G)       |
| 5974        | CakSNP5974     | <i>Kabuli</i>    | <i>Ca_Kabuli_Chr04</i>       | 12525358                       | (C/G)       |
| 5975        | CakSNP5975     | <i>Kabuli</i>    | <i>Ca_Kabuli_Chr04</i>       | 12525639                       | (T/A)       |
| 5976        | CakSNP5976     | <i>Kabuli</i>    | <i>Ca_Kabuli_Chr04</i>       | 12534847                       | (T/C)       |
| 5977        | CakSNP5977     | <i>Kabuli</i>    | <i>Ca_Kabuli_Chr04</i>       | 12558541                       | (T/C)       |
| 5978        | CakSNP5978     | <i>Kabuli</i>    | <i>Ca_Kabuli_Chr04</i>       | 12558680                       | (C/T)       |
| 5979        | CakSNP5979     | <i>Kabuli</i>    | <i>Ca_Kabuli_Chr04</i>       | 12568707                       | (G/A)       |
| 5980        | CakSNP5980     | <i>Kabuli</i>    | <i>Ca_Kabuli_Chr04</i>       | 12568845                       | (G/T)       |
| 5981        | CakSNP5981     | <i>Kabuli</i>    | <i>Ca_Kabuli_Chr04</i>       | 12568905                       | (G/A)       |
| 5982        | CakSNP5982     | <i>Kabuli</i>    | <i>Ca_Kabuli_Chr04</i>       | 12568944                       | (A/G)       |
| 5983        | CakSNP5983     | <i>Kabuli</i>    | <i>Ca_Kabuli_Chr04</i>       | 12568995                       | (G/A)       |
| 5984        | CakSNP5984     | <i>Kabuli</i>    | <i>Ca_Kabuli_Chr04</i>       | 12569133                       | (G/A)       |
| 5985        | CakSNP5985     | <i>Kabuli</i>    | <i>Ca_Kabuli_Chr04</i>       | 12574650                       | (G/A)       |
| 5986        | CakSNP5986     | <i>Kabuli</i>    | <i>Ca_Kabuli_Chr04</i>       | 12578259                       | (A/G)       |
| 5987        | CakSNP5987     | <i>Kabuli</i>    | <i>Ca_Kabuli_Chr04</i>       | 12578350                       | (A/G)       |
| 5988        | CakSNP5988     | <i>Kabuli</i>    | <i>Ca_Kabuli_Chr04</i>       | 12581371                       | (G/T)       |
| 5989        | CakSNP5989     | <i>Kabuli</i>    | <i>Ca_Kabuli_Chr04</i>       | 12692925                       | (C/T)       |
| 5990        | CakSNP5990     | <i>Kabuli</i>    | <i>Ca_Kabuli_Chr04</i>       | 12692958                       | (G/C)       |
| 5991        | CakSNP5991     | <i>Kabuli</i>    | <i>Ca_Kabuli_Chr04</i>       | 12693000                       | (T/C)       |
| 5992        | CakSNP5992     | <i>Kabuli</i>    | <i>Ca_Kabuli_Chr04</i>       | 12740330                       | (A/G)       |
| 5993        | CakSNP5993     | <i>Kabuli</i>    | <i>Ca_Kabuli_Chr04</i>       | 12740351                       | (T/G)       |
| 5994        | CakSNP5994     | <i>Kabuli</i>    | <i>Ca_Kabuli_Chr04</i>       | 12779146                       | (A/C)       |
| 5995        | CakSNP5995     | <i>Kabuli</i>    | <i>Ca_Kabuli_Chr04</i>       | 12780274                       | (C/T)       |
| 5996        | CakSNP5996     | <i>Kabuli</i>    | <i>Ca_Kabuli_Chr04</i>       | 12795036                       | (G/A)       |
| 5997        | CakSNP5997     | <i>Kabuli</i>    | <i>Ca_Kabuli_Chr04</i>       | 12795037                       | (G/A)       |
| 5998        | CakSNP5998     | <i>Kabuli</i>    | <i>Ca_Kabuli_Chr04</i>       | 12869023                       | (C/T)       |
| 5999        | CakSNP5999     | <i>Kabuli</i>    | <i>Ca_Kabuli_Chr04</i>       | 12869049                       | (C/T)       |
| 6000        | CakSNP6000     | <i>Kabuli</i>    | <i>Ca_Kabuli_Chr04</i>       | 12907910                       | (C/A)       |
| 6001        | CakSNP6001     | <i>Kabuli</i>    | <i>Ca_Kabuli_Chr04</i>       | 12908080                       | (C/T)       |
| 6002        | CakSNP6002     | <i>Kabuli</i>    | <i>Ca_Kabuli_Chr04</i>       | 12911860                       | (A/G)       |
| 6003        | CakSNP6003     | <i>Kabuli</i>    | <i>Ca_Kabuli_Chr04</i>       | 12911874                       | (T/C)       |
| 6004        | CakSNP6004     | <i>Kabuli</i>    | <i>Ca_Kabuli_Chr04</i>       | 12911888                       | (G/C)       |

| <b>S.N.</b> | <b>SNP IDs</b> | <b>Cultivars</b> | <b>Chromosomes/scaffolds</b> | <b>Physical positions (bp)</b> | <b>SNPs</b> |
|-------------|----------------|------------------|------------------------------|--------------------------------|-------------|
| 6005        | CakSNP6005     | <i>Kabuli</i>    | <i>Ca_Kabuli_Chr04</i>       | 12912015                       | (G/A)       |
| 6006        | CakSNP6006     | <i>Kabuli</i>    | <i>Ca_Kabuli_Chr04</i>       | 12955130                       | (G/A)       |
| 6007        | CakSNP6007     | <i>Kabuli</i>    | <i>Ca_Kabuli_Chr04</i>       | 12973657                       | (C/A)       |
| 6008        | CakSNP6008     | <i>Kabuli</i>    | <i>Ca_Kabuli_Chr04</i>       | 12982420                       | (G/A)       |
| 6009        | CakSNP6009     | <i>Kabuli</i>    | <i>Ca_Kabuli_Chr04</i>       | 13018788                       | (C/G)       |
| 6010        | CakSNP6010     | <i>Kabuli</i>    | <i>Ca_Kabuli_Chr04</i>       | 13020891                       | (A/G)       |
| 6011        | CakSNP6011     | <i>Kabuli</i>    | <i>Ca_Kabuli_Chr04</i>       | 13050470                       | (T/C)       |
| 6012        | CakSNP6012     | <i>Kabuli</i>    | <i>Ca_Kabuli_Chr04</i>       | 13050516                       | (A/G)       |
| 6013        | CakSNP6013     | <i>Kabuli</i>    | <i>Ca_Kabuli_Chr04</i>       | 13050527                       | (C/T)       |
| 6014        | CakSNP6014     | <i>Kabuli</i>    | <i>Ca_Kabuli_Chr04</i>       | 13050585                       | (C/T)       |
| 6015        | CakSNP6015     | <i>Kabuli</i>    | <i>Ca_Kabuli_Chr04</i>       | 13062744                       | (T/A)       |
| 6016        | CakSNP6016     | <i>Kabuli</i>    | <i>Ca_Kabuli_Chr04</i>       | 13062761                       | (A/T)       |
| 6017        | CakSNP6017     | <i>Kabuli</i>    | <i>Ca_Kabuli_Chr04</i>       | 13062805                       | (C/G)       |
| 6018        | CakSNP6018     | <i>Kabuli</i>    | <i>Ca_Kabuli_Chr04</i>       | 13062972                       | (A/T)       |
| 6019        | CakSNP6019     | <i>Kabuli</i>    | <i>Ca_Kabuli_Chr04</i>       | 13063689                       | (T/A)       |
| 6020        | CakSNP6020     | <i>Kabuli</i>    | <i>Ca_Kabuli_Chr04</i>       | 13063699                       | (G/T)       |
| 6021        | CakSNP6021     | <i>Kabuli</i>    | <i>Ca_Kabuli_Chr04</i>       | 13069574                       | (T/C)       |
| 6022        | CakSNP6022     | <i>Kabuli</i>    | <i>Ca_Kabuli_Chr04</i>       | 13071169                       | (T/A)       |
| 6023        | CakSNP6023     | <i>Kabuli</i>    | <i>Ca_Kabuli_Chr04</i>       | 13071199                       | (A/T)       |
| 6024        | CakSNP6024     | <i>Kabuli</i>    | <i>Ca_Kabuli_Chr04</i>       | 13071230                       | (T/G)       |
| 6025        | CakSNP6025     | <i>Kabuli</i>    | <i>Ca_Kabuli_Chr04</i>       | 13072114                       | (T/A)       |
| 6026        | CakSNP6026     | <i>Kabuli</i>    | <i>Ca_Kabuli_Chr04</i>       | 13072118                       | (T/G)       |
| 6027        | CakSNP6027     | <i>Kabuli</i>    | <i>Ca_Kabuli_Chr04</i>       | 13072208                       | (C/A)       |
| 6028        | CakSNP6028     | <i>Kabuli</i>    | <i>Ca_Kabuli_Chr04</i>       | 13082999                       | (A/G)       |
| 6029        | CakSNP6029     | <i>Kabuli</i>    | <i>Ca_Kabuli_Chr04</i>       | 13102381                       | (G/A)       |
| 6030        | CakSNP6030     | <i>Kabuli</i>    | <i>Ca_Kabuli_Chr04</i>       | 13102348                       | (G/T)       |
| 6031        | CakSNP6031     | <i>Kabuli</i>    | <i>Ca_Kabuli_Chr04</i>       | 13147948                       | (A/G)       |
| 6032        | CakSNP6032     | <i>Kabuli</i>    | <i>Ca_Kabuli_Chr04</i>       | 13147951                       | (C/T)       |
| 6033        | CakSNP6033     | <i>Kabuli</i>    | <i>Ca_Kabuli_Chr04</i>       | 13147960                       | (T/C)       |
| 6034        | CakSNP6034     | <i>Kabuli</i>    | <i>Ca_Kabuli_Chr04</i>       | 13147965                       | (A/G)       |
| 6035        | CakSNP6035     | <i>Kabuli</i>    | <i>Ca_Kabuli_Chr04</i>       | 13148016                       | (G/A)       |
| 6036        | CakSNP6036     | <i>Kabuli</i>    | <i>Ca_Kabuli_Chr04</i>       | 13179829                       | (T/C)       |
| 6037        | CakSNP6037     | <i>Kabuli</i>    | <i>Ca_Kabuli_Chr04</i>       | 13203008                       | (A/T)       |
| 6038        | CakSNP6038     | <i>Kabuli</i>    | <i>Ca_Kabuli_Chr04</i>       | 13229035                       | (C/T)       |
| 6039        | CakSNP6039     | <i>Kabuli</i>    | <i>Ca_Kabuli_Chr04</i>       | 13252015                       | (A/T)       |
| 6040        | CakSNP6040     | <i>Kabuli</i>    | <i>Ca_Kabuli_Chr04</i>       | 13252077                       | (C/G)       |
| 6041        | CakSNP6041     | <i>Kabuli</i>    | <i>Ca_Kabuli_Chr04</i>       | 13252126                       | (T/C)       |
| 6042        | CakSNP6042     | <i>Kabuli</i>    | <i>Ca_Kabuli_Chr04</i>       | 13252212                       | (G/A)       |
| 6043        | CakSNP6043     | <i>Kabuli</i>    | <i>Ca_Kabuli_Chr04</i>       | 13272282                       | (T/C)       |

| <b>S.N.</b> | <b>SNP IDs</b> | <b>Cultivars</b> | <b>Chromosomes/scaffolds</b> | <b>Physical positions (bp)</b> | <b>SNPs</b> |
|-------------|----------------|------------------|------------------------------|--------------------------------|-------------|
| 6044        | CakSNP6044     | <i>Kabuli</i>    | <i>Ca_Kabuli_Chr04</i>       | 13282984                       | (A/C)       |
| 6045        | CakSNP6045     | <i>Kabuli</i>    | <i>Ca_Kabuli_Chr04</i>       | 13296221                       | (A/T)       |
| 6046        | CakSNP6046     | <i>Kabuli</i>    | <i>Ca_Kabuli_Chr04</i>       | 13296217                       | (G/T)       |
| 6047        | CakSNP6047     | <i>Kabuli</i>    | <i>Ca_Kabuli_Chr04</i>       | 13310700                       | (T/C)       |
| 6048        | CakSNP6048     | <i>Kabuli</i>    | <i>Ca_Kabuli_Chr04</i>       | 13318811                       | (C/T)       |
| 6049        | CakSNP6049     | <i>Kabuli</i>    | <i>Ca_Kabuli_Chr04</i>       | 13331280                       | (A/G)       |
| 6050        | CakSNP6050     | <i>Kabuli</i>    | <i>Ca_Kabuli_Chr04</i>       | 13332384                       | (G/A)       |
| 6051        | CakSNP6051     | <i>Kabuli</i>    | <i>Ca_Kabuli_Chr04</i>       | 13332452                       | (T/C)       |
| 6052        | CakSNP6052     | <i>Kabuli</i>    | <i>Ca_Kabuli_Chr04</i>       | 13376456                       | (A/T)       |
| 6053        | CakSNP6053     | <i>Kabuli</i>    | <i>Ca_Kabuli_Chr04</i>       | 13463481                       | (C/T)       |
| 6054        | CakSNP6054     | <i>Kabuli</i>    | <i>Ca_Kabuli_Chr04</i>       | 13500679                       | (A/C)       |
| 6055        | CakSNP6055     | <i>Kabuli</i>    | <i>Ca_Kabuli_Chr04</i>       | 13500693                       | (G/A)       |
| 6056        | CakSNP6056     | <i>Kabuli</i>    | <i>Ca_Kabuli_Chr04</i>       | 13588956                       | (C/T)       |
| 6057        | CakSNP6057     | <i>Kabuli</i>    | <i>Ca_Kabuli_Chr04</i>       | 13588928                       | (T/C)       |
| 6058        | CakSNP6058     | <i>Kabuli</i>    | <i>Ca_Kabuli_Chr04</i>       | 13646571                       | (T/C)       |
| 6059        | CakSNP6059     | <i>Kabuli</i>    | <i>Ca_Kabuli_Chr04</i>       | 13646628                       | (C/T)       |
| 6060        | CakSNP6060     | <i>Kabuli</i>    | <i>Ca_Kabuli_Chr04</i>       | 13687456                       | (G/A)       |
| 6061        | CakSNP6061     | <i>Kabuli</i>    | <i>Ca_Kabuli_Chr04</i>       | 13713380                       | (G/T)       |
| 6062        | CakSNP6062     | <i>Kabuli</i>    | <i>Ca_Kabuli_Chr04</i>       | 13713367                       | (G/C)       |
| 6063        | CakSNP6063     | <i>Kabuli</i>    | <i>Ca_Kabuli_Chr04</i>       | 13724666                       | (G/C)       |
| 6064        | CakSNP6064     | <i>Kabuli</i>    | <i>Ca_Kabuli_Chr04</i>       | 13787448                       | (A/C)       |
| 6065        | CakSNP6065     | <i>Kabuli</i>    | <i>Ca_Kabuli_Chr04</i>       | 13787649                       | (T/C)       |
| 6066        | CakSNP6066     | <i>Kabuli</i>    | <i>Ca_Kabuli_Chr04</i>       | 13787720                       | (G/C)       |
| 6067        | CakSNP6067     | <i>Kabuli</i>    | <i>Ca_Kabuli_Chr04</i>       | 13823667                       | (T/A)       |
| 6068        | CakSNP6068     | <i>Kabuli</i>    | <i>Ca_Kabuli_Chr04</i>       | 13823672                       | (G/T)       |
| 6069        | CakSNP6069     | <i>Kabuli</i>    | <i>Ca_Kabuli_Chr04</i>       | 13823695                       | (T/C)       |
| 6070        | CakSNP6070     | <i>Kabuli</i>    | <i>Ca_Kabuli_Chr04</i>       | 13838241                       | (G/T)       |
| 6071        | CakSNP6071     | <i>Kabuli</i>    | <i>Ca_Kabuli_Chr04</i>       | 13838796                       | (A/G)       |
| 6072        | CakSNP6072     | <i>Kabuli</i>    | <i>Ca_Kabuli_Chr04</i>       | 13839294                       | (A/G)       |
| 6073        | CakSNP6073     | <i>Kabuli</i>    | <i>Ca_Kabuli_Chr04</i>       | 13839288                       | (G/A)       |
| 6074        | CakSNP6074     | <i>Kabuli</i>    | <i>Ca_Kabuli_Chr04</i>       | 13840191                       | (T/A)       |
| 6075        | CakSNP6075     | <i>Kabuli</i>    | <i>Ca_Kabuli_Chr04</i>       | 13840227                       | (C/A)       |
| 6076        | CakSNP6076     | <i>Kabuli</i>    | <i>Ca_Kabuli_Chr04</i>       | 13840251                       | (A/G)       |
| 6077        | CakSNP6077     | <i>Kabuli</i>    | <i>Ca_Kabuli_Chr04</i>       | 13840484                       | (T/C)       |
| 6078        | CakSNP6078     | <i>Kabuli</i>    | <i>Ca_Kabuli_Chr04</i>       | 13841340                       | (G/T)       |
| 6079        | CakSNP6079     | <i>Kabuli</i>    | <i>Ca_Kabuli_Chr04</i>       | 13841401                       | (A/G)       |
| 6080        | CakSNP6080     | <i>Kabuli</i>    | <i>Ca_Kabuli_Chr04</i>       | 13845581                       | (A/T)       |
| 6081        | CakSNP6081     | <i>Kabuli</i>    | <i>Ca_Kabuli_Chr04</i>       | 13845639                       | (A/C)       |
| 6082        | CakSNP6082     | <i>Kabuli</i>    | <i>Ca_Kabuli_Chr04</i>       | 13845675                       | (T/A)       |

| <b>S.N.</b> | <b>SNP IDs</b> | <b>Cultivars</b> | <b>Chromosomes/scaffolds</b> | <b>Physical positions (bp)</b> | <b>SNPs</b> |
|-------------|----------------|------------------|------------------------------|--------------------------------|-------------|
| 6083        | CakSNP6083     | <i>Kabuli</i>    | <i>Ca_Kabuli_Chr04</i>       | 13900013                       | (A/G)       |
| 6084        | CakSNP6084     | <i>Kabuli</i>    | <i>Ca_Kabuli_Chr04</i>       | 13923366                       | (T/C)       |
| 6085        | CakSNP6085     | <i>Kabuli</i>    | <i>Ca_Kabuli_Chr04</i>       | 13949513                       | (A/C)       |
| 6086        | CakSNP6086     | <i>Kabuli</i>    | <i>Ca_Kabuli_Chr04</i>       | 13949580                       | (C/G)       |
| 6087        | CakSNP6087     | <i>Kabuli</i>    | <i>Ca_Kabuli_Chr04</i>       | 13954832                       | (G/A)       |
| 6088        | CakSNP6088     | <i>Kabuli</i>    | <i>Ca_Kabuli_Chr04</i>       | 13968291                       | (C/T)       |
| 6089        | CakSNP6089     | <i>Kabuli</i>    | <i>Ca_Kabuli_Chr04</i>       | 13968397                       | (A/G)       |
| 6090        | CakSNP6090     | <i>Kabuli</i>    | <i>Ca_Kabuli_Chr04</i>       | 13968354                       | (A/G)       |
| 6091        | CakSNP6091     | <i>Kabuli</i>    | <i>Ca_Kabuli_Chr04</i>       | 13982970                       | (G/A)       |
| 6092        | CakSNP6092     | <i>Kabuli</i>    | <i>Ca_Kabuli_Chr04</i>       | 14031548                       | (A/G)       |
| 6093        | CakSNP6093     | <i>Kabuli</i>    | <i>Ca_Kabuli_Chr04</i>       | 14056908                       | (A/G)       |
| 6094        | CakSNP6094     | <i>Kabuli</i>    | <i>Ca_Kabuli_Chr04</i>       | 14073059                       | (C/T)       |
| 6095        | CakSNP6095     | <i>Kabuli</i>    | <i>Ca_Kabuli_Chr04</i>       | 14073056                       | (C/T)       |
| 6096        | CakSNP6096     | <i>Kabuli</i>    | <i>Ca_Kabuli_Chr04</i>       | 14073045                       | (G/A)       |
| 6097        | CakSNP6097     | <i>Kabuli</i>    | <i>Ca_Kabuli_Chr04</i>       | 14073044                       | (C/T)       |
| 6098        | CakSNP6098     | <i>Kabuli</i>    | <i>Ca_Kabuli_Chr04</i>       | 14073004                       | (C/A)       |
| 6099        | CakSNP6099     | <i>Kabuli</i>    | <i>Ca_Kabuli_Chr04</i>       | 14082157                       | (C/A)       |
| 6100        | CakSNP6100     | <i>Kabuli</i>    | <i>Ca_Kabuli_Chr04</i>       | 14082158                       | (T/G)       |
| 6101        | CakSNP6101     | <i>Kabuli</i>    | <i>Ca_Kabuli_Chr04</i>       | 14082186                       | (G/A)       |
| 6102        | CakSNP6102     | <i>Kabuli</i>    | <i>Ca_Kabuli_Chr04</i>       | 14082210                       | (T/C)       |
| 6103        | CakSNP6103     | <i>Kabuli</i>    | <i>Ca_Kabuli_Chr04</i>       | 14082285                       | (C/G)       |
| 6104        | CakSNP6104     | <i>Kabuli</i>    | <i>Ca_Kabuli_Chr04</i>       | 14093027                       | (A/G)       |
| 6105        | CakSNP6105     | <i>Kabuli</i>    | <i>Ca_Kabuli_Chr04</i>       | 14104096                       | (A/C)       |
| 6106        | CakSNP6106     | <i>Kabuli</i>    | <i>Ca_Kabuli_Chr04</i>       | 14112911                       | (C/A)       |
| 6107        | CakSNP6107     | <i>Kabuli</i>    | <i>Ca_Kabuli_Chr04</i>       | 14132659                       | (A/C)       |
| 6108        | CakSNP6108     | <i>Kabuli</i>    | <i>Ca_Kabuli_Chr04</i>       | 14149589                       | (G/A)       |
| 6109        | CakSNP6109     | <i>Kabuli</i>    | <i>Ca_Kabuli_Chr04</i>       | 14149588                       | (A/G)       |
| 6110        | CakSNP6110     | <i>Kabuli</i>    | <i>Ca_Kabuli_Chr04</i>       | 14155978                       | (A/G)       |
| 6111        | CakSNP6111     | <i>Kabuli</i>    | <i>Ca_Kabuli_Chr04</i>       | 14156014                       | (C/T)       |
| 6112        | CakSNP6112     | <i>Kabuli</i>    | <i>Ca_Kabuli_Chr04</i>       | 14163060                       | (C/T)       |
| 6113        | CakSNP6113     | <i>Kabuli</i>    | <i>Ca_Kabuli_Chr04</i>       | 14181527                       | (A/G)       |
| 6114        | CakSNP6114     | <i>Kabuli</i>    | <i>Ca_Kabuli_Chr04</i>       | 14189356                       | (A/C)       |
| 6115        | CakSNP6115     | <i>Kabuli</i>    | <i>Ca_Kabuli_Chr04</i>       | 14199191                       | (G/C)       |
| 6116        | CakSNP6116     | <i>Kabuli</i>    | <i>Ca_Kabuli_Chr04</i>       | 14225284                       | (A/G)       |
| 6117        | CakSNP6117     | <i>Kabuli</i>    | <i>Ca_Kabuli_Chr04</i>       | 14270811                       | (G/A)       |
| 6118        | CakSNP6118     | <i>Kabuli</i>    | <i>Ca_Kabuli_Chr04</i>       | 14270763                       | (G/A)       |
| 6119        | CakSNP6119     | <i>Kabuli</i>    | <i>Ca_Kabuli_Chr04</i>       | 14453942                       | (T/C)       |
| 6120        | CakSNP6120     | <i>Kabuli</i>    | <i>Ca_Kabuli_Chr04</i>       | 14515543                       | (T/A)       |
| 6121        | CakSNP6121     | <i>Kabuli</i>    | <i>Ca_Kabuli_Chr04</i>       | 14515531                       | (T/A)       |

| <b>S.N.</b> | <b>SNP IDs</b> | <b>Cultivars</b> | <b>Chromosomes/scaffolds</b> | <b>Physical positions (bp)</b> | <b>SNPs</b> |
|-------------|----------------|------------------|------------------------------|--------------------------------|-------------|
| 6122        | CakSNP6122     | <i>Kabuli</i>    | <i>Ca_Kabuli_Chr04</i>       | 14517424                       | (C/T)       |
| 6123        | CakSNP6123     | <i>Kabuli</i>    | <i>Ca_Kabuli_Chr04</i>       | 14529007                       | (A/G)       |
| 6124        | CakSNP6124     | <i>Kabuli</i>    | <i>Ca_Kabuli_Chr04</i>       | 14565948                       | (A/C)       |
| 6125        | CakSNP6125     | <i>Kabuli</i>    | <i>Ca_Kabuli_Chr04</i>       | 14566064                       | (G/A)       |
| 6126        | CakSNP6126     | <i>Kabuli</i>    | <i>Ca_Kabuli_Chr04</i>       | 14566074                       | (T/A)       |
| 6127        | CakSNP6127     | <i>Kabuli</i>    | <i>Ca_Kabuli_Chr04</i>       | 14566081                       | (A/G)       |
| 6128        | CakSNP6128     | <i>Kabuli</i>    | <i>Ca_Kabuli_Chr04</i>       | 14611177                       | (A/G)       |
| 6129        | CakSNP6129     | <i>Kabuli</i>    | <i>Ca_Kabuli_Chr04</i>       | 14657743                       | (C/T)       |
| 6130        | CakSNP6130     | <i>Kabuli</i>    | <i>Ca_Kabuli_Chr04</i>       | 14696775                       | (T/C)       |
| 6131        | CakSNP6131     | <i>Kabuli</i>    | <i>Ca_Kabuli_Chr04</i>       | 14698825                       | (A/T)       |
| 6132        | CakSNP6132     | <i>Kabuli</i>    | <i>Ca_Kabuli_Chr04</i>       | 14699270                       | (T/C)       |
| 6133        | CakSNP6133     | <i>Kabuli</i>    | <i>Ca_Kabuli_Chr04</i>       | 14748051                       | (A/C)       |
| 6134        | CakSNP6134     | <i>Kabuli</i>    | <i>Ca_Kabuli_Chr04</i>       | 14770484                       | (C/T)       |
| 6135        | CakSNP6135     | <i>Kabuli</i>    | <i>Ca_Kabuli_Chr04</i>       | 14770524                       | (G/C)       |
| 6136        | CakSNP6136     | <i>Kabuli</i>    | <i>Ca_Kabuli_Chr04</i>       | 14770525                       | (G/A)       |
| 6137        | CakSNP6137     | <i>Kabuli</i>    | <i>Ca_Kabuli_Chr04</i>       | 14770532                       | (C/T)       |
| 6138        | CakSNP6138     | <i>Kabuli</i>    | <i>Ca_Kabuli_Chr04</i>       | 14785530                       | (G/A)       |
| 6139        | CakSNP6139     | <i>Kabuli</i>    | <i>Ca_Kabuli_Chr04</i>       | 14785557                       | (A/C)       |
| 6140        | CakSNP6140     | <i>Kabuli</i>    | <i>Ca_Kabuli_Chr04</i>       | 14786093                       | (C/G)       |
| 6141        | CakSNP6141     | <i>Kabuli</i>    | <i>Ca_Kabuli_Chr04</i>       | 14831204                       | (A/T)       |
| 6142        | CakSNP6142     | <i>Kabuli</i>    | <i>Ca_Kabuli_Chr04</i>       | 14831298                       | (A/T)       |
| 6143        | CakSNP6143     | <i>Kabuli</i>    | <i>Ca_Kabuli_Chr04</i>       | 14855406                       | (T/C)       |
| 6144        | CakSNP6144     | <i>Kabuli</i>    | <i>Ca_Kabuli_Chr04</i>       | 14855417                       | (T/A)       |
| 6145        | CakSNP6145     | <i>Kabuli</i>    | <i>Ca_Kabuli_Chr04</i>       | 14870658                       | (T/G)       |
| 6146        | CakSNP6146     | <i>Kabuli</i>    | <i>Ca_Kabuli_Chr04</i>       | 14870641                       | (G/A)       |
| 6147        | CakSNP6147     | <i>Kabuli</i>    | <i>Ca_Kabuli_Chr04</i>       | 14989557                       | (C/T)       |
| 6148        | CakSNP6148     | <i>Kabuli</i>    | <i>Ca_Kabuli_Chr04</i>       | 14989544                       | (C/T)       |
| 6149        | CakSNP6149     | <i>Kabuli</i>    | <i>Ca_Kabuli_Chr04</i>       | 14989526                       | (G/A)       |
| 6150        | CakSNP6150     | <i>Kabuli</i>    | <i>Ca_Kabuli_Chr04</i>       | 15025765                       | (T/A)       |
| 6151        | CakSNP6151     | <i>Kabuli</i>    | <i>Ca_Kabuli_Chr04</i>       | 15025785                       | (T/G)       |
| 6152        | CakSNP6152     | <i>Kabuli</i>    | <i>Ca_Kabuli_Chr04</i>       | 15026058                       | (C/T)       |
| 6153        | CakSNP6153     | <i>Kabuli</i>    | <i>Ca_Kabuli_Chr04</i>       | 15036362                       | (A/G)       |
| 6154        | CakSNP6154     | <i>Kabuli</i>    | <i>Ca_Kabuli_Chr04</i>       | 15039897                       | (C/G)       |
| 6155        | CakSNP6155     | <i>Kabuli</i>    | <i>Ca_Kabuli_Chr04</i>       | 15039905                       | (T/C)       |
| 6156        | CakSNP6156     | <i>Kabuli</i>    | <i>Ca_Kabuli_Chr04</i>       | 15039948                       | (G/C)       |
| 6157        | CakSNP6157     | <i>Kabuli</i>    | <i>Ca_Kabuli_Chr04</i>       | 15039996                       | (C/T)       |
| 6158        | CakSNP6158     | <i>Kabuli</i>    | <i>Ca_Kabuli_Chr04</i>       | 15040072                       | (A/C)       |
| 6159        | CakSNP6159     | <i>Kabuli</i>    | <i>Ca_Kabuli_Chr04</i>       | 15053643                       | (T/C)       |
| 6160        | CakSNP6160     | <i>Kabuli</i>    | <i>Ca_Kabuli_Chr04</i>       | 15075489                       | (T/G)       |

| <b>S.N.</b> | <b>SNP IDs</b> | <b>Cultivars</b> | <b>Chromosomes/scaffolds</b> | <b>Physical positions (bp)</b> | <b>SNPs</b> |
|-------------|----------------|------------------|------------------------------|--------------------------------|-------------|
| 6161        | CakSNP6161     | <i>Kabuli</i>    | <i>Ca_Kabuli_Chr04</i>       | 15075502                       | (G/T)       |
| 6162        | CakSNP6162     | <i>Kabuli</i>    | <i>Ca_Kabuli_Chr04</i>       | 15159143                       | (A/G)       |
| 6163        | CakSNP6163     | <i>Kabuli</i>    | <i>Ca_Kabuli_Chr04</i>       | 15190387                       | (T/G)       |
| 6164        | CakSNP6164     | <i>Kabuli</i>    | <i>Ca_Kabuli_Chr04</i>       | 15190423                       | (T/A)       |
| 6165        | CakSNP6165     | <i>Kabuli</i>    | <i>Ca_Kabuli_Chr04</i>       | 15212787                       | (G/A)       |
| 6166        | CakSNP6166     | <i>Kabuli</i>    | <i>Ca_Kabuli_Chr04</i>       | 15240675                       | (G/A)       |
| 6167        | CakSNP6167     | <i>Kabuli</i>    | <i>Ca_Kabuli_Chr04</i>       | 15240678                       | (T/C)       |
| 6168        | CakSNP6168     | <i>Kabuli</i>    | <i>Ca_Kabuli_Chr04</i>       | 15299232                       | (G/A)       |
| 6169        | CakSNP6169     | <i>Kabuli</i>    | <i>Ca_Kabuli_Chr04</i>       | 15320777                       | (G/A)       |
| 6170        | CakSNP6170     | <i>Kabuli</i>    | <i>Ca_Kabuli_Chr04</i>       | 15357651                       | (C/T)       |
| 6171        | CakSNP6171     | <i>Kabuli</i>    | <i>Ca_Kabuli_Chr04</i>       | 15357695                       | (A/G)       |
| 6172        | CakSNP6172     | <i>Kabuli</i>    | <i>Ca_Kabuli_Chr04</i>       | 15394470                       | (T/C)       |
| 6173        | CakSNP6173     | <i>Kabuli</i>    | <i>Ca_Kabuli_Chr04</i>       | 15448826                       | (G/T)       |
| 6174        | CakSNP6174     | <i>Kabuli</i>    | <i>Ca_Kabuli_Chr04</i>       | 15449843                       | (A/G)       |
| 6175        | CakSNP6175     | <i>Kabuli</i>    | <i>Ca_Kabuli_Chr04</i>       | 15542543                       | (T/C)       |
| 6176        | CakSNP6176     | <i>Kabuli</i>    | <i>Ca_Kabuli_Chr04</i>       | 15542597                       | (A/G)       |
| 6177        | CakSNP6177     | <i>Kabuli</i>    | <i>Ca_Kabuli_Chr04</i>       | 15552690                       | (C/T)       |
| 6178        | CakSNP6178     | <i>Kabuli</i>    | <i>Ca_Kabuli_Chr04</i>       | 15552683                       | (C/T)       |
| 6179        | CakSNP6179     | <i>Kabuli</i>    | <i>Ca_Kabuli_Chr04</i>       | 15697128                       | (A/G)       |
| 6180        | CakSNP6180     | <i>Kabuli</i>    | <i>Ca_Kabuli_Chr04</i>       | 15697303                       | (G/T)       |
| 6181        | CakSNP6181     | <i>Kabuli</i>    | <i>Ca_Kabuli_Chr04</i>       | 15698212                       | (G/T)       |
| 6182        | CakSNP6182     | <i>Kabuli</i>    | <i>Ca_Kabuli_Chr04</i>       | 15698179                       | (G/A)       |
| 6183        | CakSNP6183     | <i>Kabuli</i>    | <i>Ca_Kabuli_Chr04</i>       | 15698233                       | (A/C)       |
| 6184        | CakSNP6184     | <i>Kabuli</i>    | <i>Ca_Kabuli_Chr04</i>       | 15698305                       | (T/C)       |
| 6185        | CakSNP6185     | <i>Kabuli</i>    | <i>Ca_Kabuli_Chr04</i>       | 15698405                       | (G/A)       |
| 6186        | CakSNP6186     | <i>Kabuli</i>    | <i>Ca_Kabuli_Chr04</i>       | 15698486                       | (T/C)       |
| 6187        | CakSNP6187     | <i>Kabuli</i>    | <i>Ca_Kabuli_Chr04</i>       | 15698456                       | (T/C)       |
| 6188        | CakSNP6188     | <i>Kabuli</i>    | <i>Ca_Kabuli_Chr04</i>       | 15698444                       | (C/T)       |
| 6189        | CakSNP6189     | <i>Kabuli</i>    | <i>Ca_Kabuli_Chr04</i>       | 15698420                       | (G/C)       |
| 6190        | CakSNP6190     | <i>Kabuli</i>    | <i>Ca_Kabuli_Chr04</i>       | 15700603                       | (A/T)       |
| 6191        | CakSNP6191     | <i>Kabuli</i>    | <i>Ca_Kabuli_Chr04</i>       | 15700630                       | (G/A)       |
| 6192        | CakSNP6192     | <i>Kabuli</i>    | <i>Ca_Kabuli_Chr04</i>       | 15713955                       | (G/A)       |
| 6193        | CakSNP6193     | <i>Kabuli</i>    | <i>Ca_Kabuli_Chr04</i>       | 15717281                       | (T/C)       |
| 6194        | CakSNP6194     | <i>Kabuli</i>    | <i>Ca_Kabuli_Chr04</i>       | 15735993                       | (T/C)       |
| 6195        | CakSNP6195     | <i>Kabuli</i>    | <i>Ca_Kabuli_Chr04</i>       | 15736015                       | (C/T)       |
| 6196        | CakSNP6196     | <i>Kabuli</i>    | <i>Ca_Kabuli_Chr04</i>       | 15736562                       | (A/T)       |
| 6197        | CakSNP6197     | <i>Kabuli</i>    | <i>Ca_Kabuli_Chr04</i>       | 15736619                       | (T/G)       |
| 6198        | CakSNP6198     | <i>Kabuli</i>    | <i>Ca_Kabuli_Chr04</i>       | 15736627                       | (T/C)       |
| 6199        | CakSNP6199     | <i>Kabuli</i>    | <i>Ca_Kabuli_Chr04</i>       | 15744703                       | (T/G)       |



| <b>S.N.</b> | <b>SNP IDs</b> | <b>Cultivars</b> | <b>Chromosomes/scaffolds</b> | <b>Physical positions (bp)</b> | <b>SNPs</b> |
|-------------|----------------|------------------|------------------------------|--------------------------------|-------------|
| 6200        | CakSNP6200     | <i>Kabuli</i>    | <i>Ca_Kabuli_Chr04</i>       | 15752567                       | (G/C)       |
| 6201        | CakSNP6201     | <i>Kabuli</i>    | <i>Ca_Kabuli_Chr04</i>       | 15766341                       | (A/G)       |
| 6202        | CakSNP6202     | <i>Kabuli</i>    | <i>Ca_Kabuli_Chr04</i>       | 15766360                       | (G/A)       |
| 6203        | CakSNP6203     | <i>Kabuli</i>    | <i>Ca_Kabuli_Chr04</i>       | 15772235                       | (C/A)       |
| 6204        | CakSNP6204     | <i>Kabuli</i>    | <i>Ca_Kabuli_Chr04</i>       | 15772275                       | (A/G)       |
| 6205        | CakSNP6205     | <i>Kabuli</i>    | <i>Ca_Kabuli_Chr04</i>       | 15821282                       | (G/A)       |
| 6206        | CakSNP6206     | <i>Kabuli</i>    | <i>Ca_Kabuli_Chr04</i>       | 15821311                       | (T/A)       |
| 6207        | CakSNP6207     | <i>Kabuli</i>    | <i>Ca_Kabuli_Chr04</i>       | 15825621                       | (A/T)       |
| 6208        | CakSNP6208     | <i>Kabuli</i>    | <i>Ca_Kabuli_Chr04</i>       | 15860388                       | (A/G)       |
| 6209        | CakSNP6209     | <i>Kabuli</i>    | <i>Ca_Kabuli_Chr04</i>       | 15860359                       | (C/A)       |
| 6210        | CakSNP6210     | <i>Kabuli</i>    | <i>Ca_Kabuli_Chr04</i>       | 15900602                       | (G/A)       |
| 6211        | CakSNP6211     | <i>Kabuli</i>    | <i>Ca_Kabuli_Chr04</i>       | 15925936                       | (T/G)       |
| 6212        | CakSNP6212     | <i>Kabuli</i>    | <i>Ca_Kabuli_Chr04</i>       | 15926160                       | (A/G)       |
| 6213        | CakSNP6213     | <i>Kabuli</i>    | <i>Ca_Kabuli_Chr04</i>       | 15934607                       | (A/T)       |
| 6214        | CakSNP6214     | <i>Kabuli</i>    | <i>Ca_Kabuli_Chr04</i>       | 15934901                       | (T/G)       |
| 6215        | CakSNP6215     | <i>Kabuli</i>    | <i>Ca_Kabuli_Chr04</i>       | 15957070                       | (T/A)       |
| 6216        | CakSNP6216     | <i>Kabuli</i>    | <i>Ca_Kabuli_Chr04</i>       | 16027272                       | (G/A)       |
| 6217        | CakSNP6217     | <i>Kabuli</i>    | <i>Ca_Kabuli_Chr04</i>       | 16027292                       | (A/C)       |
| 6218        | CakSNP6218     | <i>Kabuli</i>    | <i>Ca_Kabuli_Chr04</i>       | 16027368                       | (G/T)       |
| 6219        | CakSNP6219     | <i>Kabuli</i>    | <i>Ca_Kabuli_Chr04</i>       | 16027299                       | (T/A)       |
| 6220        | CakSNP6220     | <i>Kabuli</i>    | <i>Ca_Kabuli_Chr04</i>       | 16045694                       | (T/G)       |
| 6221        | CakSNP6221     | <i>Kabuli</i>    | <i>Ca_Kabuli_Chr04</i>       | 16045870                       | (G/A)       |
| 6222        | CakSNP6222     | <i>Kabuli</i>    | <i>Ca_Kabuli_Chr04</i>       | 16046928                       | (T/C)       |
| 6223        | CakSNP6223     | <i>Kabuli</i>    | <i>Ca_Kabuli_Chr04</i>       | 16278600                       | (C/T)       |
| 6224        | CakSNP6224     | <i>Kabuli</i>    | <i>Ca_Kabuli_Chr04</i>       | 16278671                       | (T/A)       |
| 6225        | CakSNP6225     | <i>Kabuli</i>    | <i>Ca_Kabuli_Chr04</i>       | 16446305                       | (T/C)       |
| 6226        | CakSNP6226     | <i>Kabuli</i>    | <i>Ca_Kabuli_Chr04</i>       | 16446341                       | (T/G)       |
| 6227        | CakSNP6227     | <i>Kabuli</i>    | <i>Ca_Kabuli_Chr04</i>       | 16446336                       | (C/G)       |
| 6228        | CakSNP6228     | <i>Kabuli</i>    | <i>Ca_Kabuli_Chr04</i>       | 16446956                       | (T/C)       |
| 6229        | CakSNP6229     | <i>Kabuli</i>    | <i>Ca_Kabuli_Chr04</i>       | 16457940                       | (G/A)       |
| 6230        | CakSNP6230     | <i>Kabuli</i>    | <i>Ca_Kabuli_Chr04</i>       | 16501291                       | (T/A)       |
| 6231        | CakSNP6231     | <i>Kabuli</i>    | <i>Ca_Kabuli_Chr04</i>       | 16501306                       | (T/A)       |
| 6232        | CakSNP6232     | <i>Kabuli</i>    | <i>Ca_Kabuli_Chr04</i>       | 16501354                       | (C/T)       |
| 6233        | CakSNP6233     | <i>Kabuli</i>    | <i>Ca_Kabuli_Chr04</i>       | 16501782                       | (G/A)       |
| 6234        | CakSNP6234     | <i>Kabuli</i>    | <i>Ca_Kabuli_Chr04</i>       | 16501781                       | (C/A)       |
| 6235        | CakSNP6235     | <i>Kabuli</i>    | <i>Ca_Kabuli_Chr04</i>       | 16501769                       | (C/T)       |
| 6236        | CakSNP6236     | <i>Kabuli</i>    | <i>Ca_Kabuli_Chr04</i>       | 16501738                       | (G/A)       |
| 6237        | CakSNP6237     | <i>Kabuli</i>    | <i>Ca_Kabuli_Chr04</i>       | 16501716                       | (T/C)       |
| 6238        | CakSNP6238     | <i>Kabuli</i>    | <i>Ca_Kabuli_Chr04</i>       | 16505159                       | (A/G)       |

| <b>S.N.</b> | <b>SNP IDs</b> | <b>Cultivars</b> | <b>Chromosomes/scaffolds</b> | <b>Physical positions (bp)</b> | <b>SNPs</b> |
|-------------|----------------|------------------|------------------------------|--------------------------------|-------------|
| 6239        | CakSNP6239     | <i>Kabuli</i>    | <i>Ca_Kabuli_Chr04</i>       | 16536754                       | (C/T)       |
| 6240        | CakSNP6240     | <i>Kabuli</i>    | <i>Ca_Kabuli_Chr04</i>       | 16571288                       | (T/C)       |
| 6241        | CakSNP6241     | <i>Kabuli</i>    | <i>Ca_Kabuli_Chr04</i>       | 16586863                       | (G/C)       |
| 6242        | CakSNP6242     | <i>Kabuli</i>    | <i>Ca_Kabuli_Chr04</i>       | 16586913                       | (G/C)       |
| 6243        | CakSNP6243     | <i>Kabuli</i>    | <i>Ca_Kabuli_Chr04</i>       | 16586929                       | (G/C)       |
| 6244        | CakSNP6244     | <i>Kabuli</i>    | <i>Ca_Kabuli_Chr04</i>       | 16619312                       | (T/C)       |
| 6245        | CakSNP6245     | <i>Kabuli</i>    | <i>Ca_Kabuli_Chr04</i>       | 16622514                       | (C/A)       |
| 6246        | CakSNP6246     | <i>Kabuli</i>    | <i>Ca_Kabuli_Chr04</i>       | 16625148                       | (T/G)       |
| 6247        | CakSNP6247     | <i>Kabuli</i>    | <i>Ca_Kabuli_Chr04</i>       | 16625270                       | (T/G)       |
| 6248        | CakSNP6248     | <i>Kabuli</i>    | <i>Ca_Kabuli_Chr04</i>       | 16625221                       | (G/A)       |
| 6249        | CakSNP6249     | <i>Kabuli</i>    | <i>Ca_Kabuli_Chr04</i>       | 16628559                       | (T/G)       |
| 6250        | CakSNP6250     | <i>Kabuli</i>    | <i>Ca_Kabuli_Chr04</i>       | 16628591                       | (T/G)       |
| 6251        | CakSNP6251     | <i>Kabuli</i>    | <i>Ca_Kabuli_Chr04</i>       | 16628594                       | (T/G)       |
| 6252        | CakSNP6252     | <i>Kabuli</i>    | <i>Ca_Kabuli_Chr04</i>       | 16628542                       | (G/A)       |
| 6253        | CakSNP6253     | <i>Kabuli</i>    | <i>Ca_Kabuli_Chr04</i>       | 16628540                       | (G/A)       |
| 6254        | CakSNP6254     | <i>Kabuli</i>    | <i>Ca_Kabuli_Chr04</i>       | 16628536                       | (T/A)       |
| 6255        | CakSNP6255     | <i>Kabuli</i>    | <i>Ca_Kabuli_Chr04</i>       | 16628529                       | (C/A)       |
| 6256        | CakSNP6256     | <i>Kabuli</i>    | <i>Ca_Kabuli_Chr04</i>       | 16628527                       | (G/A)       |
| 6257        | CakSNP6257     | <i>Kabuli</i>    | <i>Ca_Kabuli_Chr04</i>       | 16628523                       | (T/C)       |
| 6258        | CakSNP6258     | <i>Kabuli</i>    | <i>Ca_Kabuli_Chr04</i>       | 16629560                       | (G/T)       |
| 6259        | CakSNP6259     | <i>Kabuli</i>    | <i>Ca_Kabuli_Chr04</i>       | 16629559                       | (T/G)       |
| 6260        | CakSNP6260     | <i>Kabuli</i>    | <i>Ca_Kabuli_Chr04</i>       | 16629638                       | (C/A)       |
| 6261        | CakSNP6261     | <i>Kabuli</i>    | <i>Ca_Kabuli_Chr04</i>       | 16630385                       | (G/T)       |
| 6262        | CakSNP6262     | <i>Kabuli</i>    | <i>Ca_Kabuli_Chr04</i>       | 16669916                       | (T/C)       |
| 6263        | CakSNP6263     | <i>Kabuli</i>    | <i>Ca_Kabuli_Chr04</i>       | 16749740                       | (A/G)       |
| 6264        | CakSNP6264     | <i>Kabuli</i>    | <i>Ca_Kabuli_Chr04</i>       | 16750416                       | (A/G)       |
| 6265        | CakSNP6265     | <i>Kabuli</i>    | <i>Ca_Kabuli_Chr04</i>       | 16751205                       | (T/C)       |
| 6266        | CakSNP6266     | <i>Kabuli</i>    | <i>Ca_Kabuli_Chr04</i>       | 16789476                       | (G/A)       |
| 6267        | CakSNP6267     | <i>Kabuli</i>    | <i>Ca_Kabuli_Chr04</i>       | 16789532                       | (A/C)       |
| 6268        | CakSNP6268     | <i>Kabuli</i>    | <i>Ca_Kabuli_Chr04</i>       | 16820726                       | (C/A)       |
| 6269        | CakSNP6269     | <i>Kabuli</i>    | <i>Ca_Kabuli_Chr04</i>       | 16837336                       | (T/A)       |
| 6270        | CakSNP6270     | <i>Kabuli</i>    | <i>Ca_Kabuli_Chr04</i>       | 16839081                       | (T/A)       |
| 6271        | CakSNP6271     | <i>Kabuli</i>    | <i>Ca_Kabuli_Chr04</i>       | 16845299                       | (G/A)       |
| 6272        | CakSNP6272     | <i>Kabuli</i>    | <i>Ca_Kabuli_Chr04</i>       | 16889650                       | (A/T)       |
| 6273        | CakSNP6273     | <i>Kabuli</i>    | <i>Ca_Kabuli_Chr04</i>       | 16926545                       | (T/C)       |
| 6274        | CakSNP6274     | <i>Kabuli</i>    | <i>Ca_Kabuli_Chr04</i>       | 16926527                       | (T/A)       |
| 6275        | CakSNP6275     | <i>Kabuli</i>    | <i>Ca_Kabuli_Chr04</i>       | 16926614                       | (A/T)       |
| 6276        | CakSNP6276     | <i>Kabuli</i>    | <i>Ca_Kabuli_Chr04</i>       | 17028303                       | (A/G)       |
| 6277        | CakSNP6277     | <i>Kabuli</i>    | <i>Ca_Kabuli_Chr04</i>       | 17028368                       | (G/A)       |

| <b>S.N.</b> | <b>SNP IDs</b> | <b>Cultivars</b> | <b>Chromosomes/scaffolds</b> | <b>Physical positions (bp)</b> | <b>SNPs</b> |
|-------------|----------------|------------------|------------------------------|--------------------------------|-------------|
| 6278        | CakSNP6278     | <i>Kabuli</i>    | <i>Ca_Kabuli_Chr04</i>       | 17028523                       | (C/T)       |
| 6279        | CakSNP6279     | <i>Kabuli</i>    | <i>Ca_Kabuli_Chr04</i>       | 17028495                       | (T/A)       |
| 6280        | CakSNP6280     | <i>Kabuli</i>    | <i>Ca_Kabuli_Chr04</i>       | 17032676                       | (T/C)       |
| 6281        | CakSNP6281     | <i>Kabuli</i>    | <i>Ca_Kabuli_Chr04</i>       | 17032673                       | (C/T)       |
| 6282        | CakSNP6282     | <i>Kabuli</i>    | <i>Ca_Kabuli_Chr04</i>       | 17059830                       | (G/A)       |
| 6283        | CakSNP6283     | <i>Kabuli</i>    | <i>Ca_Kabuli_Chr04</i>       | 17059833                       | (A/T)       |
| 6284        | CakSNP6284     | <i>Kabuli</i>    | <i>Ca_Kabuli_Chr04</i>       | 17059852                       | (T/C)       |
| 6285        | CakSNP6285     | <i>Kabuli</i>    | <i>Ca_Kabuli_Chr04</i>       | 17059866                       | (G/A)       |
| 6286        | CakSNP6286     | <i>Kabuli</i>    | <i>Ca_Kabuli_Chr04</i>       | 17059872                       | (A/G)       |
| 6287        | CakSNP6287     | <i>Kabuli</i>    | <i>Ca_Kabuli_Chr04</i>       | 17059887                       | (G/A)       |
| 6288        | CakSNP6288     | <i>Kabuli</i>    | <i>Ca_Kabuli_Chr04</i>       | 17093090                       | (C/G)       |
| 6289        | CakSNP6289     | <i>Kabuli</i>    | <i>Ca_Kabuli_Chr04</i>       | 17147875                       | (C/T)       |
| 6290        | CakSNP6290     | <i>Kabuli</i>    | <i>Ca_Kabuli_Chr04</i>       | 17147926                       | (T/C)       |
| 6291        | CakSNP6291     | <i>Kabuli</i>    | <i>Ca_Kabuli_Chr04</i>       | 17187560                       | (C/G)       |
| 6292        | CakSNP6292     | <i>Kabuli</i>    | <i>Ca_Kabuli_Chr04</i>       | 17191562                       | (T/A)       |
| 6293        | CakSNP6293     | <i>Kabuli</i>    | <i>Ca_Kabuli_Chr04</i>       | 17199316                       | (T/C)       |
| 6294        | CakSNP6294     | <i>Kabuli</i>    | <i>Ca_Kabuli_Chr04</i>       | 17199477                       | (G/A)       |
| 6295        | CakSNP6295     | <i>Kabuli</i>    | <i>Ca_Kabuli_Chr04</i>       | 17199432                       | (G/A)       |
| 6296        | CakSNP6296     | <i>Kabuli</i>    | <i>Ca_Kabuli_Chr04</i>       | 17202770                       | (A/G)       |
| 6297        | CakSNP6297     | <i>Kabuli</i>    | <i>Ca_Kabuli_Chr04</i>       | 17225334                       | (G/A)       |
| 6298        | CakSNP6298     | <i>Kabuli</i>    | <i>Ca_Kabuli_Chr04</i>       | 17264248                       | (C/A)       |
| 6299        | CakSNP6299     | <i>Kabuli</i>    | <i>Ca_Kabuli_Chr04</i>       | 17264592                       | (G/A)       |
| 6300        | CakSNP6300     | <i>Kabuli</i>    | <i>Ca_Kabuli_Chr04</i>       | 17264621                       | (C/G)       |
| 6301        | CakSNP6301     | <i>Kabuli</i>    | <i>Ca_Kabuli_Chr04</i>       | 17264637                       | (C/T)       |
| 6302        | CakSNP6302     | <i>Kabuli</i>    | <i>Ca_Kabuli_Chr04</i>       | 17282119                       | (T/C)       |
| 6303        | CakSNP6303     | <i>Kabuli</i>    | <i>Ca_Kabuli_Chr04</i>       | 17282139                       | (G/C)       |
| 6304        | CakSNP6304     | <i>Kabuli</i>    | <i>Ca_Kabuli_Chr04</i>       | 17282148                       | (G/C)       |
| 6305        | CakSNP6305     | <i>Kabuli</i>    | <i>Ca_Kabuli_Chr04</i>       | 17282336                       | (G/T)       |
| 6306        | CakSNP6306     | <i>Kabuli</i>    | <i>Ca_Kabuli_Chr04</i>       | 17282345                       | (G/C)       |
| 6307        | CakSNP6307     | <i>Kabuli</i>    | <i>Ca_Kabuli_Chr04</i>       | 17289594                       | (G/C)       |
| 6308        | CakSNP6308     | <i>Kabuli</i>    | <i>Ca_Kabuli_Chr04</i>       | 17297498                       | (G/T)       |
| 6309        | CakSNP6309     | <i>Kabuli</i>    | <i>Ca_Kabuli_Chr04</i>       | 17297567                       | (G/A)       |
| 6310        | CakSNP6310     | <i>Kabuli</i>    | <i>Ca_Kabuli_Chr04</i>       | 17297563                       | (A/G)       |
| 6311        | CakSNP6311     | <i>Kabuli</i>    | <i>Ca_Kabuli_Chr04</i>       | 17309656                       | (A/C)       |
| 6312        | CakSNP6312     | <i>Kabuli</i>    | <i>Ca_Kabuli_Chr04</i>       | 17345431                       | (T/C)       |
| 6313        | CakSNP6313     | <i>Kabuli</i>    | <i>Ca_Kabuli_Chr04</i>       | 17345436                       | (G/T)       |
| 6314        | CakSNP6314     | <i>Kabuli</i>    | <i>Ca_Kabuli_Chr04</i>       | 17345439                       | (G/A)       |
| 6315        | CakSNP6315     | <i>Kabuli</i>    | <i>Ca_Kabuli_Chr04</i>       | 17345448                       | (T/G)       |
| 6316        | CakSNP6316     | <i>Kabuli</i>    | <i>Ca_Kabuli_Chr04</i>       | 17345500                       | (G/A)       |

| <b>S.N.</b> | <b>SNP IDs</b> | <b>Cultivars</b> | <b>Chromosomes/scaffolds</b> | <b>Physical positions (bp)</b> | <b>SNPs</b> |
|-------------|----------------|------------------|------------------------------|--------------------------------|-------------|
| 6317        | CakSNP6317     | <i>Kabuli</i>    | <i>Ca_Kabuli_Chr04</i>       | 17345483                       | (C/A)       |
| 6318        | CakSNP6318     | <i>Kabuli</i>    | <i>Ca_Kabuli_Chr04</i>       | 17345454                       | (A/G)       |
| 6319        | CakSNP6319     | <i>Kabuli</i>    | <i>Ca_Kabuli_Chr04</i>       | 17358736                       | (C/T)       |
| 6320        | CakSNP6320     | <i>Kabuli</i>    | <i>Ca_Kabuli_Chr04</i>       | 17361143                       | (T/A)       |
| 6321        | CakSNP6321     | <i>Kabuli</i>    | <i>Ca_Kabuli_Chr04</i>       | 17396325                       | (A/G)       |
| 6322        | CakSNP6322     | <i>Kabuli</i>    | <i>Ca_Kabuli_Chr04</i>       | 17396349                       | (T/G)       |
| 6323        | CakSNP6323     | <i>Kabuli</i>    | <i>Ca_Kabuli_Chr04</i>       | 17396352                       | (T/G)       |
| 6324        | CakSNP6324     | <i>Kabuli</i>    | <i>Ca_Kabuli_Chr04</i>       | 17429456                       | (A/T)       |
| 6325        | CakSNP6325     | <i>Kabuli</i>    | <i>Ca_Kabuli_Chr04</i>       | 17429457                       | (A/T)       |
| 6326        | CakSNP6326     | <i>Kabuli</i>    | <i>Ca_Kabuli_Chr04</i>       | 17429468                       | (T/C)       |
| 6327        | CakSNP6327     | <i>Kabuli</i>    | <i>Ca_Kabuli_Chr04</i>       | 17429747                       | (G/A)       |
| 6328        | CakSNP6328     | <i>Kabuli</i>    | <i>Ca_Kabuli_Chr04</i>       | 17429742                       | (A/G)       |
| 6329        | CakSNP6329     | <i>Kabuli</i>    | <i>Ca_Kabuli_Chr04</i>       | 17429735                       | (A/G)       |
| 6330        | CakSNP6330     | <i>Kabuli</i>    | <i>Ca_Kabuli_Chr04</i>       | 17429699                       | (G/C)       |
| 6331        | CakSNP6331     | <i>Kabuli</i>    | <i>Ca_Kabuli_Chr04</i>       | 17433782                       | (G/A)       |
| 6332        | CakSNP6332     | <i>Kabuli</i>    | <i>Ca_Kabuli_Chr04</i>       | 17433914                       | (G/A)       |
| 6333        | CakSNP6333     | <i>Kabuli</i>    | <i>Ca_Kabuli_Chr04</i>       | 17444578                       | (A/C)       |
| 6334        | CakSNP6334     | <i>Kabuli</i>    | <i>Ca_Kabuli_Chr04</i>       | 17472129                       | (T/A)       |
| 6335        | CakSNP6335     | <i>Kabuli</i>    | <i>Ca_Kabuli_Chr04</i>       | 17472992                       | (T/G)       |
| 6336        | CakSNP6336     | <i>Kabuli</i>    | <i>Ca_Kabuli_Chr04</i>       | 17473174                       | (C/T)       |
| 6337        | CakSNP6337     | <i>Kabuli</i>    | <i>Ca_Kabuli_Chr04</i>       | 17473237                       | (T/C)       |
| 6338        | CakSNP6338     | <i>Kabuli</i>    | <i>Ca_Kabuli_Chr04</i>       | 17473234                       | (C/A)       |
| 6339        | CakSNP6339     | <i>Kabuli</i>    | <i>Ca_Kabuli_Chr04</i>       | 17603613                       | (T/C)       |
| 6340        | CakSNP6340     | <i>Kabuli</i>    | <i>Ca_Kabuli_Chr04</i>       | 17603677                       | (G/C)       |
| 6341        | CakSNP6341     | <i>Kabuli</i>    | <i>Ca_Kabuli_Chr04</i>       | 17603689                       | (T/C)       |
| 6342        | CakSNP6342     | <i>Kabuli</i>    | <i>Ca_Kabuli_Chr04</i>       | 17603725                       | (T/C)       |
| 6343        | CakSNP6343     | <i>Kabuli</i>    | <i>Ca_Kabuli_Chr04</i>       | 17609554                       | (A/T)       |
| 6344        | CakSNP6344     | <i>Kabuli</i>    | <i>Ca_Kabuli_Chr04</i>       | 17621035                       | (G/T)       |
| 6345        | CakSNP6345     | <i>Kabuli</i>    | <i>Ca_Kabuli_Chr04</i>       | 17621609                       | (G/A)       |
| 6346        | CakSNP6346     | <i>Kabuli</i>    | <i>Ca_Kabuli_Chr04</i>       | 17647558                       | (G/A)       |
| 6347        | CakSNP6347     | <i>Kabuli</i>    | <i>Ca_Kabuli_Chr04</i>       | 17652735                       | (T/C)       |
| 6348        | CakSNP6348     | <i>Kabuli</i>    | <i>Ca_Kabuli_Chr04</i>       | 17685058                       | (T/G)       |
| 6349        | CakSNP6349     | <i>Kabuli</i>    | <i>Ca_Kabuli_Chr04</i>       | 17685113                       | (C/A)       |
| 6350        | CakSNP6350     | <i>Kabuli</i>    | <i>Ca_Kabuli_Chr04</i>       | 17718540                       | (C/T)       |
| 6351        | CakSNP6351     | <i>Kabuli</i>    | <i>Ca_Kabuli_Chr04</i>       | 17718536                       | (C/A)       |
| 6352        | CakSNP6352     | <i>Kabuli</i>    | <i>Ca_Kabuli_Chr04</i>       | 17718894                       | (G/A)       |
| 6353        | CakSNP6353     | <i>Kabuli</i>    | <i>Ca_Kabuli_Chr04</i>       | 17718922                       | (T/G)       |
| 6354        | CakSNP6354     | <i>Kabuli</i>    | <i>Ca_Kabuli_Chr04</i>       | 17718997                       | (C/A)       |
| 6355        | CakSNP6355     | <i>Kabuli</i>    | <i>Ca_Kabuli_Chr04</i>       | 17729988                       | (A/C)       |

| <b>S.N.</b> | <b>SNP IDs</b> | <b>Cultivars</b> | <b>Chromosomes/scaffolds</b> | <b>Physical positions (bp)</b> | <b>SNPs</b> |
|-------------|----------------|------------------|------------------------------|--------------------------------|-------------|
| 6356        | CakSNP6356     | <i>Kabuli</i>    | <i>Ca_Kabuli_Chr04</i>       | 17748171                       | (A/T)       |
| 6357        | CakSNP6357     | <i>Kabuli</i>    | <i>Ca_Kabuli_Chr04</i>       | 17752013                       | (C/T)       |
| 6358        | CakSNP6358     | <i>Kabuli</i>    | <i>Ca_Kabuli_Chr04</i>       | 17760841                       | (A/G)       |
| 6359        | CakSNP6359     | <i>Kabuli</i>    | <i>Ca_Kabuli_Chr04</i>       | 17760853                       | (T/G)       |
| 6360        | CakSNP6360     | <i>Kabuli</i>    | <i>Ca_Kabuli_Chr04</i>       | 17768507                       | (T/C)       |
| 6361        | CakSNP6361     | <i>Kabuli</i>    | <i>Ca_Kabuli_Chr04</i>       | 17771708                       | (C/G)       |
| 6362        | CakSNP6362     | <i>Kabuli</i>    | <i>Ca_Kabuli_Chr04</i>       | 17784792                       | (T/A)       |
| 6363        | CakSNP6363     | <i>Kabuli</i>    | <i>Ca_Kabuli_Chr04</i>       | 17826472                       | (G/A)       |
| 6364        | CakSNP6364     | <i>Kabuli</i>    | <i>Ca_Kabuli_Chr04</i>       | 17826533                       | (A/C)       |
| 6365        | CakSNP6365     | <i>Kabuli</i>    | <i>Ca_Kabuli_Chr04</i>       | 17826601                       | (T/C)       |
| 6366        | CakSNP6366     | <i>Kabuli</i>    | <i>Ca_Kabuli_Chr04</i>       | 17826580                       | (C/G)       |
| 6367        | CakSNP6367     | <i>Kabuli</i>    | <i>Ca_Kabuli_Chr04</i>       | 17826543                       | (T/C)       |
| 6368        | CakSNP6368     | <i>Kabuli</i>    | <i>Ca_Kabuli_Chr04</i>       | 17843480                       | (G/T)       |
| 6369        | CakSNP6369     | <i>Kabuli</i>    | <i>Ca_Kabuli_Chr04</i>       | 17847737                       | (G/A)       |
| 6370        | CakSNP6370     | <i>Kabuli</i>    | <i>Ca_Kabuli_Chr04</i>       | 17847854                       | (T/C)       |
| 6371        | CakSNP6371     | <i>Kabuli</i>    | <i>Ca_Kabuli_Chr04</i>       | 17856307                       | (T/C)       |
| 6372        | CakSNP6372     | <i>Kabuli</i>    | <i>Ca_Kabuli_Chr04</i>       | 17856311                       | (T/G)       |
| 6373        | CakSNP6373     | <i>Kabuli</i>    | <i>Ca_Kabuli_Chr04</i>       | 17856334                       | (A/G)       |
| 6374        | CakSNP6374     | <i>Kabuli</i>    | <i>Ca_Kabuli_Chr04</i>       | 17857753                       | (C/T)       |
| 6375        | CakSNP6375     | <i>Kabuli</i>    | <i>Ca_Kabuli_Chr04</i>       | 17858122                       | (T/G)       |
| 6376        | CakSNP6376     | <i>Kabuli</i>    | <i>Ca_Kabuli_Chr04</i>       | 17858133                       | (C/T)       |
| 6377        | CakSNP6377     | <i>Kabuli</i>    | <i>Ca_Kabuli_Chr04</i>       | 17858135                       | (G/A)       |
| 6378        | CakSNP6378     | <i>Kabuli</i>    | <i>Ca_Kabuli_Chr04</i>       | 17858140                       | (A/C)       |
| 6379        | CakSNP6379     | <i>Kabuli</i>    | <i>Ca_Kabuli_Chr04</i>       | 17858143                       | (A/T)       |
| 6380        | CakSNP6380     | <i>Kabuli</i>    | <i>Ca_Kabuli_Chr04</i>       | 17858144                       | (G/C)       |
| 6381        | CakSNP6381     | <i>Kabuli</i>    | <i>Ca_Kabuli_Chr04</i>       | 17858152                       | (A/T)       |
| 6382        | CakSNP6382     | <i>Kabuli</i>    | <i>Ca_Kabuli_Chr04</i>       | 17858159                       | (C/A)       |
| 6383        | CakSNP6383     | <i>Kabuli</i>    | <i>Ca_Kabuli_Chr04</i>       | 17858226                       | (C/T)       |
| 6384        | CakSNP6384     | <i>Kabuli</i>    | <i>Ca_Kabuli_Chr04</i>       | 17871769                       | (C/A)       |
| 6385        | CakSNP6385     | <i>Kabuli</i>    | <i>Ca_Kabuli_Chr04</i>       | 17871763                       | (T/C)       |
| 6386        | CakSNP6386     | <i>Kabuli</i>    | <i>Ca_Kabuli_Chr04</i>       | 17871804                       | (T/C)       |
| 6387        | CakSNP6387     | <i>Kabuli</i>    | <i>Ca_Kabuli_Chr04</i>       | 17871828                       | (A/C)       |
| 6388        | CakSNP6388     | <i>Kabuli</i>    | <i>Ca_Kabuli_Chr04</i>       | 17871919                       | (A/G)       |
| 6389        | CakSNP6389     | <i>Kabuli</i>    | <i>Ca_Kabuli_Chr04</i>       | 17871915                       | (T/A)       |
| 6390        | CakSNP6390     | <i>Kabuli</i>    | <i>Ca_Kabuli_Chr04</i>       | 17913731                       | (A/C)       |
| 6391        | CakSNP6391     | <i>Kabuli</i>    | <i>Ca_Kabuli_Chr04</i>       | 17913726                       | (G/A)       |
| 6392        | CakSNP6392     | <i>Kabuli</i>    | <i>Ca_Kabuli_Chr04</i>       | 17913719                       | (G/C)       |
| 6393        | CakSNP6393     | <i>Kabuli</i>    | <i>Ca_Kabuli_Chr04</i>       | 17913698                       | (C/T)       |
| 6394        | CakSNP6394     | <i>Kabuli</i>    | <i>Ca_Kabuli_Chr04</i>       | 17913682                       | (C/A)       |

| <b>S.N.</b> | <b>SNP IDs</b> | <b>Cultivars</b> | <b>Chromosomes/scaffolds</b> | <b>Physical positions (bp)</b> | <b>SNPs</b> |
|-------------|----------------|------------------|------------------------------|--------------------------------|-------------|
| 6395        | CakSNP6395     | <i>Kabuli</i>    | <i>Ca_Kabuli_Chr04</i>       | 17920616                       | (C/G)       |
| 6396        | CakSNP6396     | <i>Kabuli</i>    | <i>Ca_Kabuli_Chr04</i>       | 17931955                       | (G/A)       |
| 6397        | CakSNP6397     | <i>Kabuli</i>    | <i>Ca_Kabuli_Chr04</i>       | 17970218                       | (T/G)       |
| 6398        | CakSNP6398     | <i>Kabuli</i>    | <i>Ca_Kabuli_Chr04</i>       | 17970221                       | (C/T)       |
| 6399        | CakSNP6399     | <i>Kabuli</i>    | <i>Ca_Kabuli_Chr04</i>       | 17970225                       | (T/C)       |
| 6400        | CakSNP6400     | <i>Kabuli</i>    | <i>Ca_Kabuli_Chr04</i>       | 17970232                       | (A/G)       |
| 6401        | CakSNP6401     | <i>Kabuli</i>    | <i>Ca_Kabuli_Chr04</i>       | 17970280                       | (T/A)       |
| 6402        | CakSNP6402     | <i>Kabuli</i>    | <i>Ca_Kabuli_Chr04</i>       | 18053756                       | (A/G)       |
| 6403        | CakSNP6403     | <i>Kabuli</i>    | <i>Ca_Kabuli_Chr04</i>       | 18070293                       | (G/T)       |
| 6404        | CakSNP6404     | <i>Kabuli</i>    | <i>Ca_Kabuli_Chr04</i>       | 18071114                       | (C/A)       |
| 6405        | CakSNP6405     | <i>Kabuli</i>    | <i>Ca_Kabuli_Chr04</i>       | 18071324                       | (G/A)       |
| 6406        | CakSNP6406     | <i>Kabuli</i>    | <i>Ca_Kabuli_Chr04</i>       | 18089423                       | (G/C)       |
| 6407        | CakSNP6407     | <i>Kabuli</i>    | <i>Ca_Kabuli_Chr04</i>       | 18089422                       | (T/C)       |
| 6408        | CakSNP6408     | <i>Kabuli</i>    | <i>Ca_Kabuli_Chr04</i>       | 18117833                       | (T/C)       |
| 6409        | CakSNP6409     | <i>Kabuli</i>    | <i>Ca_Kabuli_Chr04</i>       | 18222762                       | (T/C)       |
| 6410        | CakSNP6410     | <i>Kabuli</i>    | <i>Ca_Kabuli_Chr04</i>       | 18231443                       | (T/C)       |
| 6411        | CakSNP6411     | <i>Kabuli</i>    | <i>Ca_Kabuli_Chr04</i>       | 18231463                       | (T/C)       |
| 6412        | CakSNP6412     | <i>Kabuli</i>    | <i>Ca_Kabuli_Chr04</i>       | 18231466                       | (T/C)       |
| 6413        | CakSNP6413     | <i>Kabuli</i>    | <i>Ca_Kabuli_Chr04</i>       | 18242020                       | (C/G)       |
| 6414        | CakSNP6414     | <i>Kabuli</i>    | <i>Ca_Kabuli_Chr04</i>       | 18241995                       | (C/G)       |
| 6415        | CakSNP6415     | <i>Kabuli</i>    | <i>Ca_Kabuli_Chr04</i>       | 18427385                       | (T/G)       |
| 6416        | CakSNP6416     | <i>Kabuli</i>    | <i>Ca_Kabuli_Chr04</i>       | 18427384                       | (C/T)       |
| 6417        | CakSNP6417     | <i>Kabuli</i>    | <i>Ca_Kabuli_Chr04</i>       | 18429046                       | (G/T)       |
| 6418        | CakSNP6418     | <i>Kabuli</i>    | <i>Ca_Kabuli_Chr04</i>       | 18429139                       | (C/T)       |
| 6419        | CakSNP6419     | <i>Kabuli</i>    | <i>Ca_Kabuli_Chr04</i>       | 18485782                       | (T/C)       |
| 6420        | CakSNP6420     | <i>Kabuli</i>    | <i>Ca_Kabuli_Chr04</i>       | 18489456                       | (G/C)       |
| 6421        | CakSNP6421     | <i>Kabuli</i>    | <i>Ca_Kabuli_Chr04</i>       | 18495186                       | (A/G)       |
| 6422        | CakSNP6422     | <i>Kabuli</i>    | <i>Ca_Kabuli_Chr04</i>       | 18545489                       | (A/T)       |
| 6423        | CakSNP6423     | <i>Kabuli</i>    | <i>Ca_Kabuli_Chr04</i>       | 18546209                       | (T/G)       |
| 6424        | CakSNP6424     | <i>Kabuli</i>    | <i>Ca_Kabuli_Chr04</i>       | 18625387                       | (G/A)       |
| 6425        | CakSNP6425     | <i>Kabuli</i>    | <i>Ca_Kabuli_Chr04</i>       | 18628582                       | (A/G)       |
| 6426        | CakSNP6426     | <i>Kabuli</i>    | <i>Ca_Kabuli_Chr04</i>       | 18710941                       | (T/G)       |
| 6427        | CakSNP6427     | <i>Kabuli</i>    | <i>Ca_Kabuli_Chr04</i>       | 18719417                       | (A/G)       |
| 6428        | CakSNP6428     | <i>Kabuli</i>    | <i>Ca_Kabuli_Chr04</i>       | 18721801                       | (G/A)       |
| 6429        | CakSNP6429     | <i>Kabuli</i>    | <i>Ca_Kabuli_Chr04</i>       | 18779396                       | (A/C)       |
| 6430        | CakSNP6430     | <i>Kabuli</i>    | <i>Ca_Kabuli_Chr04</i>       | 18812610                       | (T/C)       |
| 6431        | CakSNP6431     | <i>Kabuli</i>    | <i>Ca_Kabuli_Chr04</i>       | 18880757                       | (A/G)       |
| 6432        | CakSNP6432     | <i>Kabuli</i>    | <i>Ca_Kabuli_Chr04</i>       | 18904060                       | (G/A)       |
| 6433        | CakSNP6433     | <i>Kabuli</i>    | <i>Ca_Kabuli_Chr04</i>       | 18912038                       | (G/C)       |

| <b>S.N.</b> | <b>SNP IDs</b> | <b>Cultivars</b> | <b>Chromosomes/scaffolds</b> | <b>Physical positions (bp)</b> | <b>SNPs</b> |
|-------------|----------------|------------------|------------------------------|--------------------------------|-------------|
| 6434        | CakSNP6434     | <i>Kabuli</i>    | <i>Ca_Kabuli_Chr04</i>       | 18912137                       | (T/C)       |
| 6435        | CakSNP6435     | <i>Kabuli</i>    | <i>Ca_Kabuli_Chr04</i>       | 18912124                       | (C/A)       |
| 6436        | CakSNP6436     | <i>Kabuli</i>    | <i>Ca_Kabuli_Chr04</i>       | 18912142                       | (A/G)       |
| 6437        | CakSNP6437     | <i>Kabuli</i>    | <i>Ca_Kabuli_Chr04</i>       | 18923641                       | (G/T)       |
| 6438        | CakSNP6438     | <i>Kabuli</i>    | <i>Ca_Kabuli_Chr04</i>       | 18953354                       | (C/A)       |
| 6439        | CakSNP6439     | <i>Kabuli</i>    | <i>Ca_Kabuli_Chr04</i>       | 18953423                       | (A/C)       |
| 6440        | CakSNP6440     | <i>Kabuli</i>    | <i>Ca_Kabuli_Chr04</i>       | 18953511                       | (C/G)       |
| 6441        | CakSNP6441     | <i>Kabuli</i>    | <i>Ca_Kabuli_Chr04</i>       | 18998727                       | (C/T)       |
| 6442        | CakSNP6442     | <i>Kabuli</i>    | <i>Ca_Kabuli_Chr04</i>       | 19005285                       | (T/G)       |
| 6443        | CakSNP6443     | <i>Kabuli</i>    | <i>Ca_Kabuli_Chr04</i>       | 19005416                       | (T/G)       |
| 6444        | CakSNP6444     | <i>Kabuli</i>    | <i>Ca_Kabuli_Chr04</i>       | 19006493                       | (C/T)       |
| 6445        | CakSNP6445     | <i>Kabuli</i>    | <i>Ca_Kabuli_Chr04</i>       | 19024709                       | (C/T)       |
| 6446        | CakSNP6446     | <i>Kabuli</i>    | <i>Ca_Kabuli_Chr04</i>       | 19024699                       | (T/C)       |
| 6447        | CakSNP6447     | <i>Kabuli</i>    | <i>Ca_Kabuli_Chr04</i>       | 19206563                       | (A/G)       |
| 6448        | CakSNP6448     | <i>Kabuli</i>    | <i>Ca_Kabuli_Chr04</i>       | 19206581                       | (C/T)       |
| 6449        | CakSNP6449     | <i>Kabuli</i>    | <i>Ca_Kabuli_Chr04</i>       | 19206611                       | (T/C)       |
| 6450        | CakSNP6450     | <i>Kabuli</i>    | <i>Ca_Kabuli_Chr04</i>       | 19206613                       | (T/G)       |
| 6451        | CakSNP6451     | <i>Kabuli</i>    | <i>Ca_Kabuli_Chr04</i>       | 19206678                       | (A/T)       |
| 6452        | CakSNP6452     | <i>Kabuli</i>    | <i>Ca_Kabuli_Chr04</i>       | 19207121                       | (A/T)       |
| 6453        | CakSNP6453     | <i>Kabuli</i>    | <i>Ca_Kabuli_Chr04</i>       | 19227691                       | (G/C)       |
| 6454        | CakSNP6454     | <i>Kabuli</i>    | <i>Ca_Kabuli_Chr04</i>       | 19263964                       | (G/C)       |
| 6455        | CakSNP6455     | <i>Kabuli</i>    | <i>Ca_Kabuli_Chr04</i>       | 19263967                       | (T/G)       |
| 6456        | CakSNP6456     | <i>Kabuli</i>    | <i>Ca_Kabuli_Chr04</i>       | 19267581                       | (A/G)       |
| 6457        | CakSNP6457     | <i>Kabuli</i>    | <i>Ca_Kabuli_Chr04</i>       | 19481258                       | (A/G)       |
| 6458        | CakSNP6458     | <i>Kabuli</i>    | <i>Ca_Kabuli_Chr04</i>       | 19540632                       | (A/C)       |
| 6459        | CakSNP6459     | <i>Kabuli</i>    | <i>Ca_Kabuli_Chr04</i>       | 19540646                       | (T/G)       |
| 6460        | CakSNP6460     | <i>Kabuli</i>    | <i>Ca_Kabuli_Chr04</i>       | 19579390                       | (G/T)       |
| 6461        | CakSNP6461     | <i>Kabuli</i>    | <i>Ca_Kabuli_Chr04</i>       | 19579401                       | (C/A)       |
| 6462        | CakSNP6462     | <i>Kabuli</i>    | <i>Ca_Kabuli_Chr04</i>       | 19579423                       | (A/G)       |
| 6463        | CakSNP6463     | <i>Kabuli</i>    | <i>Ca_Kabuli_Chr04</i>       | 19579433                       | (G/A)       |
| 6464        | CakSNP6464     | <i>Kabuli</i>    | <i>Ca_Kabuli_Chr04</i>       | 19579435                       | (A/G)       |
| 6465        | CakSNP6465     | <i>Kabuli</i>    | <i>Ca_Kabuli_Chr04</i>       | 19579436                       | (A/T)       |
| 6466        | CakSNP6466     | <i>Kabuli</i>    | <i>Ca_Kabuli_Chr04</i>       | 19579442                       | (C/A)       |
| 6467        | CakSNP6467     | <i>Kabuli</i>    | <i>Ca_Kabuli_Chr04</i>       | 19649499                       | (A/G)       |
| 6468        | CakSNP6468     | <i>Kabuli</i>    | <i>Ca_Kabuli_Chr04</i>       | 19668499                       | (T/C)       |
| 6469        | CakSNP6469     | <i>Kabuli</i>    | <i>Ca_Kabuli_Chr04</i>       | 19668502                       | (T/G)       |
| 6470        | CakSNP6470     | <i>Kabuli</i>    | <i>Ca_Kabuli_Chr04</i>       | 19668595                       | (T/C)       |
| 6471        | CakSNP6471     | <i>Kabuli</i>    | <i>Ca_Kabuli_Chr04</i>       | 19688016                       | (A/G)       |
| 6472        | CakSNP6472     | <i>Kabuli</i>    | <i>Ca_Kabuli_Chr04</i>       | 19712406                       | (C/T)       |

| <b>S.N.</b> | <b>SNP IDs</b> | <b>Cultivars</b> | <b>Chromosomes/scaffolds</b> | <b>Physical positions (bp)</b> | <b>SNPs</b> |
|-------------|----------------|------------------|------------------------------|--------------------------------|-------------|
| 6473        | CakSNP6473     | <i>Kabuli</i>    | <i>Ca_Kabuli_Chr04</i>       | 19713311                       | (T/G)       |
| 6474        | CakSNP6474     | <i>Kabuli</i>    | <i>Ca_Kabuli_Chr04</i>       | 19734940                       | (G/A)       |
| 6475        | CakSNP6475     | <i>Kabuli</i>    | <i>Ca_Kabuli_Chr04</i>       | 19844376                       | (A/G)       |
| 6476        | CakSNP6476     | <i>Kabuli</i>    | <i>Ca_Kabuli_Chr04</i>       | 19869729                       | (G/T)       |
| 6477        | CakSNP6477     | <i>Kabuli</i>    | <i>Ca_Kabuli_Chr04</i>       | 19869722                       | (T/G)       |
| 6478        | CakSNP6478     | <i>Kabuli</i>    | <i>Ca_Kabuli_Chr04</i>       | 20218430                       | (T/G)       |
| 6479        | CakSNP6479     | <i>Kabuli</i>    | <i>Ca_Kabuli_Chr04</i>       | 20308992                       | (C/A)       |
| 6480        | CakSNP6480     | <i>Kabuli</i>    | <i>Ca_Kabuli_Chr04</i>       | 20309151                       | (C/T)       |
| 6481        | CakSNP6481     | <i>Kabuli</i>    | <i>Ca_Kabuli_Chr04</i>       | 20398548                       | (T/G)       |
| 6482        | CakSNP6482     | <i>Kabuli</i>    | <i>Ca_Kabuli_Chr04</i>       | 20398685                       | (A/C)       |
| 6483        | CakSNP6483     | <i>Kabuli</i>    | <i>Ca_Kabuli_Chr04</i>       | 20402361                       | (A/G)       |
| 6484        | CakSNP6484     | <i>Kabuli</i>    | <i>Ca_Kabuli_Chr04</i>       | 20402391                       | (A/G)       |
| 6485        | CakSNP6485     | <i>Kabuli</i>    | <i>Ca_Kabuli_Chr04</i>       | 20412329                       | (A/T)       |
| 6486        | CakSNP6486     | <i>Kabuli</i>    | <i>Ca_Kabuli_Chr04</i>       | 20436136                       | (G/A)       |
| 6487        | CakSNP6487     | <i>Kabuli</i>    | <i>Ca_Kabuli_Chr04</i>       | 20444953                       | (T/C)       |
| 6488        | CakSNP6488     | <i>Kabuli</i>    | <i>Ca_Kabuli_Chr04</i>       | 20599050                       | (A/G)       |
| 6489        | CakSNP6489     | <i>Kabuli</i>    | <i>Ca_Kabuli_Chr04</i>       | 20599058                       | (T/C)       |
| 6490        | CakSNP6490     | <i>Kabuli</i>    | <i>Ca_Kabuli_Chr04</i>       | 20599081                       | (C/T)       |
| 6491        | CakSNP6491     | <i>Kabuli</i>    | <i>Ca_Kabuli_Chr04</i>       | 20599091                       | (T/G)       |
| 6492        | CakSNP6492     | <i>Kabuli</i>    | <i>Ca_Kabuli_Chr04</i>       | 20656170                       | (T/G)       |
| 6493        | CakSNP6493     | <i>Kabuli</i>    | <i>Ca_Kabuli_Chr04</i>       | 20669174                       | (T/C)       |
| 6494        | CakSNP6494     | <i>Kabuli</i>    | <i>Ca_Kabuli_Chr04</i>       | 20669442                       | (G/A)       |
| 6495        | CakSNP6495     | <i>Kabuli</i>    | <i>Ca_Kabuli_Chr04</i>       | 20696913                       | (A/G)       |
| 6496        | CakSNP6496     | <i>Kabuli</i>    | <i>Ca_Kabuli_Chr04</i>       | 20696952                       | (G/T)       |
| 6497        | CakSNP6497     | <i>Kabuli</i>    | <i>Ca_Kabuli_Chr04</i>       | 20696979                       | (C/T)       |
| 6498        | CakSNP6498     | <i>Kabuli</i>    | <i>Ca_Kabuli_Chr04</i>       | 20697338                       | (T/A)       |
| 6499        | CakSNP6499     | <i>Kabuli</i>    | <i>Ca_Kabuli_Chr04</i>       | 20697408                       | (A/G)       |
| 6500        | CakSNP6500     | <i>Kabuli</i>    | <i>Ca_Kabuli_Chr04</i>       | 20774180                       | (C/T)       |
| 6501        | CakSNP6501     | <i>Kabuli</i>    | <i>Ca_Kabuli_Chr04</i>       | 20905105                       | (G/A)       |
| 6502        | CakSNP6502     | <i>Kabuli</i>    | <i>Ca_Kabuli_Chr04</i>       | 21096178                       | (G/A)       |
| 6503        | CakSNP6503     | <i>Kabuli</i>    | <i>Ca_Kabuli_Chr04</i>       | 21385308                       | (A/T)       |
| 6504        | CakSNP6504     | <i>Kabuli</i>    | <i>Ca_Kabuli_Chr04</i>       | 21830534                       | (C/T)       |
| 6505        | CakSNP6505     | <i>Kabuli</i>    | <i>Ca_Kabuli_Chr04</i>       | 21835459                       | (T/A)       |
| 6506        | CakSNP6506     | <i>Kabuli</i>    | <i>Ca_Kabuli_Chr04</i>       | 21835457                       | (T/A)       |
| 6507        | CakSNP6507     | <i>Kabuli</i>    | <i>Ca_Kabuli_Chr04</i>       | 21835454                       | (C/A)       |
| 6508        | CakSNP6508     | <i>Kabuli</i>    | <i>Ca_Kabuli_Chr04</i>       | 21835446                       | (T/A)       |
| 6509        | CakSNP6509     | <i>Kabuli</i>    | <i>Ca_Kabuli_Chr04</i>       | 21931559                       | (A/G)       |
| 6510        | CakSNP6510     | <i>Kabuli</i>    | <i>Ca_Kabuli_Chr04</i>       | 21931558                       | (G/A)       |
| 6511        | CakSNP6511     | <i>Kabuli</i>    | <i>Ca_Kabuli_Chr04</i>       | 21931541                       | (C/T)       |



| <b>S.N.</b> | <b>SNP IDs</b> | <b>Cultivars</b> | <b>Chromosomes/scaffolds</b> | <b>Physical positions (bp)</b> | <b>SNPs</b> |
|-------------|----------------|------------------|------------------------------|--------------------------------|-------------|
| 6512        | CakSNP6512     | <i>Kabuli</i>    | <i>Ca_Kabuli_Chr04</i>       | 22079566                       | (G/A)       |
| 6513        | CakSNP6513     | <i>Kabuli</i>    | <i>Ca_Kabuli_Chr04</i>       | 22237989                       | (A/T)       |
| 6514        | CakSNP6514     | <i>Kabuli</i>    | <i>Ca_Kabuli_Chr04</i>       | 22237971                       | (C/T)       |
| 6515        | CakSNP6515     | <i>Kabuli</i>    | <i>Ca_Kabuli_Chr04</i>       | 22288433                       | (T/C)       |
| 6516        | CakSNP6516     | <i>Kabuli</i>    | <i>Ca_Kabuli_Chr04</i>       | 22293495                       | (T/C)       |
| 6517        | CakSNP6517     | <i>Kabuli</i>    | <i>Ca_Kabuli_Chr04</i>       | 22850596                       | (C/G)       |
| 6518        | CakSNP6518     | <i>Kabuli</i>    | <i>Ca_Kabuli_Chr04</i>       | 22859422                       | (G/A)       |
| 6519        | CakSNP6519     | <i>Kabuli</i>    | <i>Ca_Kabuli_Chr04</i>       | 22860281                       | (A/C)       |
| 6520        | CakSNP6520     | <i>Kabuli</i>    | <i>Ca_Kabuli_Chr04</i>       | 22865436                       | (A/T)       |
| 6521        | CakSNP6521     | <i>Kabuli</i>    | <i>Ca_Kabuli_Chr04</i>       | 22865390                       | (G/A)       |
| 6522        | CakSNP6522     | <i>Kabuli</i>    | <i>Ca_Kabuli_Chr04</i>       | 22865389                       | (C/T)       |
| 6523        | CakSNP6523     | <i>Kabuli</i>    | <i>Ca_Kabuli_Chr04</i>       | 22908360                       | (A/G)       |
| 6524        | CakSNP6524     | <i>Kabuli</i>    | <i>Ca_Kabuli_Chr04</i>       | 22971660                       | (G/A)       |
| 6525        | CakSNP6525     | <i>Kabuli</i>    | <i>Ca_Kabuli_Chr04</i>       | 22971766                       | (A/G)       |
| 6526        | CakSNP6526     | <i>Kabuli</i>    | <i>Ca_Kabuli_Chr04</i>       | 22971746                       | (G/A)       |
| 6527        | CakSNP6527     | <i>Kabuli</i>    | <i>Ca_Kabuli_Chr04</i>       | 22971744                       | (A/C)       |
| 6528        | CakSNP6528     | <i>Kabuli</i>    | <i>Ca_Kabuli_Chr04</i>       | 22971847                       | (C/A)       |
| 6529        | CakSNP6529     | <i>Kabuli</i>    | <i>Ca_Kabuli_Chr04</i>       | 22971853                       | (C/A)       |
| 6530        | CakSNP6530     | <i>Kabuli</i>    | <i>Ca_Kabuli_Chr04</i>       | 22971884                       | (G/A)       |
| 6531        | CakSNP6531     | <i>Kabuli</i>    | <i>Ca_Kabuli_Chr04</i>       | 23157656                       | (C/G)       |
| 6532        | CakSNP6532     | <i>Kabuli</i>    | <i>Ca_Kabuli_Chr04</i>       | 23267842                       | (T/C)       |
| 6533        | CakSNP6533     | <i>Kabuli</i>    | <i>Ca_Kabuli_Chr04</i>       | 23267856                       | (C/T)       |
| 6534        | CakSNP6534     | <i>Kabuli</i>    | <i>Ca_Kabuli_Chr04</i>       | 23267858                       | (C/T)       |
| 6535        | CakSNP6535     | <i>Kabuli</i>    | <i>Ca_Kabuli_Chr04</i>       | 23267859                       | (T/C)       |
| 6536        | CakSNP6536     | <i>Kabuli</i>    | <i>Ca_Kabuli_Chr04</i>       | 23314624                       | (C/T)       |
| 6537        | CakSNP6537     | <i>Kabuli</i>    | <i>Ca_Kabuli_Chr04</i>       | 23314665                       | (A/C)       |
| 6538        | CakSNP6538     | <i>Kabuli</i>    | <i>Ca_Kabuli_Chr04</i>       | 23318875                       | (T/C)       |
| 6539        | CakSNP6539     | <i>Kabuli</i>    | <i>Ca_Kabuli_Chr04</i>       | 23319309                       | (G/C)       |
| 6540        | CakSNP6540     | <i>Kabuli</i>    | <i>Ca_Kabuli_Chr04</i>       | 23333610                       | (C/T)       |
| 6541        | CakSNP6541     | <i>Kabuli</i>    | <i>Ca_Kabuli_Chr04</i>       | 23333554                       | (T/C)       |
| 6542        | CakSNP6542     | <i>Kabuli</i>    | <i>Ca_Kabuli_Chr04</i>       | 23337341                       | (T/C)       |
| 6543        | CakSNP6543     | <i>Kabuli</i>    | <i>Ca_Kabuli_Chr04</i>       | 23337312                       | (T/G)       |
| 6544        | CakSNP6544     | <i>Kabuli</i>    | <i>Ca_Kabuli_Chr04</i>       | 23481919                       | (G/A)       |
| 6545        | CakSNP6545     | <i>Kabuli</i>    | <i>Ca_Kabuli_Chr04</i>       | 23481927                       | (G/T)       |
| 6546        | CakSNP6546     | <i>Kabuli</i>    | <i>Ca_Kabuli_Chr04</i>       | 23481962                       | (G/A)       |
| 6547        | CakSNP6547     | <i>Kabuli</i>    | <i>Ca_Kabuli_Chr04</i>       | 23482033                       | (A/G)       |
| 6548        | CakSNP6548     | <i>Kabuli</i>    | <i>Ca_Kabuli_Chr04</i>       | 23481998                       | (T/C)       |
| 6549        | CakSNP6549     | <i>Kabuli</i>    | <i>Ca_Kabuli_Chr04</i>       | 23486812                       | (A/G)       |
| 6550        | CakSNP6550     | <i>Kabuli</i>    | <i>Ca_Kabuli_Chr04</i>       | 23486859                       | (A/G)       |

| <b>S.N.</b> | <b>SNP IDs</b> | <b>Cultivars</b> | <b>Chromosomes/scaffolds</b> | <b>Physical positions (bp)</b> | <b>SNPs</b> |
|-------------|----------------|------------------|------------------------------|--------------------------------|-------------|
| 6551        | CakSNP6551     | <i>Kabuli</i>    | <i>Ca_Kabuli_Chr04</i>       | 23486824                       | (T/C)       |
| 6552        | CakSNP6552     | <i>Kabuli</i>    | <i>Ca_Kabuli_Chr04</i>       | 23671441                       | (T/G)       |
| 6553        | CakSNP6553     | <i>Kabuli</i>    | <i>Ca_Kabuli_Chr04</i>       | 23671443                       | (A/T)       |
| 6554        | CakSNP6554     | <i>Kabuli</i>    | <i>Ca_Kabuli_Chr04</i>       | 23731572                       | (C/T)       |
| 6555        | CakSNP6555     | <i>Kabuli</i>    | <i>Ca_Kabuli_Chr04</i>       | 23732099                       | (A/T)       |
| 6556        | CakSNP6556     | <i>Kabuli</i>    | <i>Ca_Kabuli_Chr04</i>       | 24050459                       | (G/A)       |
| 6557        | CakSNP6557     | <i>Kabuli</i>    | <i>Ca_Kabuli_Chr04</i>       | 24050464                       | (G/A)       |
| 6558        | CakSNP6558     | <i>Kabuli</i>    | <i>Ca_Kabuli_Chr04</i>       | 24120866                       | (A/G)       |
| 6559        | CakSNP6559     | <i>Kabuli</i>    | <i>Ca_Kabuli_Chr04</i>       | 24544345                       | (G/A)       |
| 6560        | CakSNP6560     | <i>Kabuli</i>    | <i>Ca_Kabuli_Chr04</i>       | 24614582                       | (G/T)       |
| 6561        | CakSNP6561     | <i>Kabuli</i>    | <i>Ca_Kabuli_Chr04</i>       | 24729302                       | (T/C)       |
| 6562        | CakSNP6562     | <i>Kabuli</i>    | <i>Ca_Kabuli_Chr04</i>       | 24732991                       | (G/T)       |
| 6563        | CakSNP6563     | <i>Kabuli</i>    | <i>Ca_Kabuli_Chr04</i>       | 24732990                       | (T/C)       |
| 6564        | CakSNP6564     | <i>Kabuli</i>    | <i>Ca_Kabuli_Chr04</i>       | 24771737                       | (T/A)       |
| 6565        | CakSNP6565     | <i>Kabuli</i>    | <i>Ca_Kabuli_Chr04</i>       | 24782714                       | (C/A)       |
| 6566        | CakSNP6566     | <i>Kabuli</i>    | <i>Ca_Kabuli_Chr04</i>       | 24782715                       | (A/G)       |
| 6567        | CakSNP6567     | <i>Kabuli</i>    | <i>Ca_Kabuli_Chr04</i>       | 24856115                       | (A/C)       |
| 6568        | CakSNP6568     | <i>Kabuli</i>    | <i>Ca_Kabuli_Chr04</i>       | 24857501                       | (A/G)       |
| 6569        | CakSNP6569     | <i>Kabuli</i>    | <i>Ca_Kabuli_Chr04</i>       | 25401714                       | (T/C)       |
| 6570        | CakSNP6570     | <i>Kabuli</i>    | <i>Ca_Kabuli_Chr04</i>       | 25446677                       | (G/C)       |
| 6571        | CakSNP6571     | <i>Kabuli</i>    | <i>Ca_Kabuli_Chr04</i>       | 25446684                       | (T/C)       |
| 6572        | CakSNP6572     | <i>Kabuli</i>    | <i>Ca_Kabuli_Chr04</i>       | 25449897                       | (T/G)       |
| 6573        | CakSNP6573     | <i>Kabuli</i>    | <i>Ca_Kabuli_Chr04</i>       | 25455156                       | (G/A)       |
| 6574        | CakSNP6574     | <i>Kabuli</i>    | <i>Ca_Kabuli_Chr04</i>       | 25455204                       | (A/G)       |
| 6575        | CakSNP6575     | <i>Kabuli</i>    | <i>Ca_Kabuli_Chr04</i>       | 25455225                       | (G/A)       |
| 6576        | CakSNP6576     | <i>Kabuli</i>    | <i>Ca_Kabuli_Chr04</i>       | 25592561                       | (T/C)       |
| 6577        | CakSNP6577     | <i>Kabuli</i>    | <i>Ca_Kabuli_Chr04</i>       | 25592548                       | (A/G)       |
| 6578        | CakSNP6578     | <i>Kabuli</i>    | <i>Ca_Kabuli_Chr04</i>       | 25592528                       | (A/C)       |
| 6579        | CakSNP6579     | <i>Kabuli</i>    | <i>Ca_Kabuli_Chr04</i>       | 25592525                       | (C/A)       |
| 6580        | CakSNP6580     | <i>Kabuli</i>    | <i>Ca_Kabuli_Chr04</i>       | 25592492                       | (T/C)       |
| 6581        | CakSNP6581     | <i>Kabuli</i>    | <i>Ca_Kabuli_Chr04</i>       | 25592487                       | (A/G)       |
| 6582        | CakSNP6582     | <i>Kabuli</i>    | <i>Ca_Kabuli_Chr04</i>       | 25592484                       | (A/C)       |
| 6583        | CakSNP6583     | <i>Kabuli</i>    | <i>Ca_Kabuli_Chr04</i>       | 25592481                       | (T/C)       |
| 6584        | CakSNP6584     | <i>Kabuli</i>    | <i>Ca_Kabuli_Chr04</i>       | 25729905                       | (C/A)       |
| 6585        | CakSNP6585     | <i>Kabuli</i>    | <i>Ca_Kabuli_Chr04</i>       | 25729914                       | (C/A)       |
| 6586        | CakSNP6586     | <i>Kabuli</i>    | <i>Ca_Kabuli_Chr04</i>       | 25729974                       | (G/C)       |
| 6587        | CakSNP6587     | <i>Kabuli</i>    | <i>Ca_Kabuli_Chr04</i>       | 25729977                       | (C/T)       |
| 6588        | CakSNP6588     | <i>Kabuli</i>    | <i>Ca_Kabuli_Chr04</i>       | 25747256                       | (T/C)       |
| 6589        | CakSNP6589     | <i>Kabuli</i>    | <i>Ca_Kabuli_Chr04</i>       | 25747262                       | (G/A)       |

| <b>S.N.</b> | <b>SNP IDs</b> | <b>Cultivars</b> | <b>Chromosomes/scaffolds</b> | <b>Physical positions (bp)</b> | <b>SNPs</b> |
|-------------|----------------|------------------|------------------------------|--------------------------------|-------------|
| 6590        | CakSNP6590     | <i>Kabuli</i>    | <i>Ca_Kabuli_Chr04</i>       | 25747274                       | (T/G)       |
| 6591        | CakSNP6591     | <i>Kabuli</i>    | <i>Ca_Kabuli_Chr04</i>       | 25747275                       | (G/A)       |
| 6592        | CakSNP6592     | <i>Kabuli</i>    | <i>Ca_Kabuli_Chr04</i>       | 25747281                       | (T/C)       |
| 6593        | CakSNP6593     | <i>Kabuli</i>    | <i>Ca_Kabuli_Chr04</i>       | 25747295                       | (G/A)       |
| 6594        | CakSNP6594     | <i>Kabuli</i>    | <i>Ca_Kabuli_Chr04</i>       | 25747296                       | (T/C)       |
| 6595        | CakSNP6595     | <i>Kabuli</i>    | <i>Ca_Kabuli_Chr04</i>       | 25747364                       | (T/A)       |
| 6596        | CakSNP6596     | <i>Kabuli</i>    | <i>Ca_Kabuli_Chr04</i>       | 25747297                       | (G/A)       |
| 6597        | CakSNP6597     | <i>Kabuli</i>    | <i>Ca_Kabuli_Chr04</i>       | 25809665                       | (T/C)       |
| 6598        | CakSNP6598     | <i>Kabuli</i>    | <i>Ca_Kabuli_Chr04</i>       | 25921165                       | (T/C)       |
| 6599        | CakSNP6599     | <i>Kabuli</i>    | <i>Ca_Kabuli_Chr04</i>       | 26000532                       | (C/T)       |
| 6600        | CakSNP6600     | <i>Kabuli</i>    | <i>Ca_Kabuli_Chr04</i>       | 26000483                       | (T/A)       |
| 6601        | CakSNP6601     | <i>Kabuli</i>    | <i>Ca_Kabuli_Chr04</i>       | 26002991                       | (C/A)       |
| 6602        | CakSNP6602     | <i>Kabuli</i>    | <i>Ca_Kabuli_Chr04</i>       | 26008744                       | (G/A)       |
| 6603        | CakSNP6603     | <i>Kabuli</i>    | <i>Ca_Kabuli_Chr04</i>       | 26008745                       | (G/A)       |
| 6604        | CakSNP6604     | <i>Kabuli</i>    | <i>Ca_Kabuli_Chr04</i>       | 26008748                       | (C/T)       |
| 6605        | CakSNP6605     | <i>Kabuli</i>    | <i>Ca_Kabuli_Chr04</i>       | 26008768                       | (A/G)       |
| 6606        | CakSNP6606     | <i>Kabuli</i>    | <i>Ca_Kabuli_Chr04</i>       | 26008816                       | (C/A)       |
| 6607        | CakSNP6607     | <i>Kabuli</i>    | <i>Ca_Kabuli_Chr04</i>       | 26009438                       | (G/T)       |
| 6608        | CakSNP6608     | <i>Kabuli</i>    | <i>Ca_Kabuli_Chr04</i>       | 26009439                       | (G/T)       |
| 6609        | CakSNP6609     | <i>Kabuli</i>    | <i>Ca_Kabuli_Chr04</i>       | 26222180                       | (A/G)       |
| 6610        | CakSNP6610     | <i>Kabuli</i>    | <i>Ca_Kabuli_Chr04</i>       | 26282236                       | (A/C)       |
| 6611        | CakSNP6611     | <i>Kabuli</i>    | <i>Ca_Kabuli_Chr04</i>       | 26324460                       | (T/C)       |
| 6612        | CakSNP6612     | <i>Kabuli</i>    | <i>Ca_Kabuli_Chr04</i>       | 26529606                       | (C/T)       |
| 6613        | CakSNP6613     | <i>Kabuli</i>    | <i>Ca_Kabuli_Chr04</i>       | 26532763                       | (T/G)       |
| 6614        | CakSNP6614     | <i>Kabuli</i>    | <i>Ca_Kabuli_Chr04</i>       | 26536919                       | (C/G)       |
| 6615        | CakSNP6615     | <i>Kabuli</i>    | <i>Ca_Kabuli_Chr04</i>       | 26537053                       | (C/T)       |
| 6616        | CakSNP6616     | <i>Kabuli</i>    | <i>Ca_Kabuli_Chr04</i>       | 26537258                       | (A/C)       |
| 6617        | CakSNP6617     | <i>Kabuli</i>    | <i>Ca_Kabuli_Chr04</i>       | 26869756                       | (A/G)       |
| 6618        | CakSNP6618     | <i>Kabuli</i>    | <i>Ca_Kabuli_Chr04</i>       | 26915602                       | (G/A)       |
| 6619        | CakSNP6619     | <i>Kabuli</i>    | <i>Ca_Kabuli_Chr04</i>       | 26915615                       | (A/G)       |
| 6620        | CakSNP6620     | <i>Kabuli</i>    | <i>Ca_Kabuli_Chr04</i>       | 26915621                       | (G/A)       |
| 6621        | CakSNP6621     | <i>Kabuli</i>    | <i>Ca_Kabuli_Chr04</i>       | 26915626                       | (C/T)       |
| 6622        | CakSNP6622     | <i>Kabuli</i>    | <i>Ca_Kabuli_Chr04</i>       | 26989085                       | (G/A)       |
| 6623        | CakSNP6623     | <i>Kabuli</i>    | <i>Ca_Kabuli_Chr04</i>       | 26989090                       | (G/T)       |
| 6624        | CakSNP6624     | <i>Kabuli</i>    | <i>Ca_Kabuli_Chr04</i>       | 26989204                       | (A/C)       |
| 6625        | CakSNP6625     | <i>Kabuli</i>    | <i>Ca_Kabuli_Chr04</i>       | 27102807                       | (G/A)       |
| 6626        | CakSNP6626     | <i>Kabuli</i>    | <i>Ca_Kabuli_Chr04</i>       | 27102817                       | (A/C)       |
| 6627        | CakSNP6627     | <i>Kabuli</i>    | <i>Ca_Kabuli_Chr04</i>       | 27102833                       | (G/T)       |
| 6628        | CakSNP6628     | <i>Kabuli</i>    | <i>Ca_Kabuli_Chr04</i>       | 27262241                       | (C/T)       |

| <b>S.N.</b> | <b>SNP IDs</b> | <b>Cultivars</b> | <b>Chromosomes/scaffolds</b> | <b>Physical positions (bp)</b> | <b>SNPs</b> |
|-------------|----------------|------------------|------------------------------|--------------------------------|-------------|
| 6629        | CakSNP6629     | <i>Kabuli</i>    | <i>Ca_Kabuli_Chr04</i>       | 27262893                       | (G/A)       |
| 6630        | CakSNP6630     | <i>Kabuli</i>    | <i>Ca_Kabuli_Chr04</i>       | 27262870                       | (C/T)       |
| 6631        | CakSNP6631     | <i>Kabuli</i>    | <i>Ca_Kabuli_Chr04</i>       | 27262830                       | (T/A)       |
| 6632        | CakSNP6632     | <i>Kabuli</i>    | <i>Ca_Kabuli_Chr04</i>       | 27268301                       | (G/A)       |
| 6633        | CakSNP6633     | <i>Kabuli</i>    | <i>Ca_Kabuli_Chr04</i>       | 27268278                       | (C/T)       |
| 6634        | CakSNP6634     | <i>Kabuli</i>    | <i>Ca_Kabuli_Chr04</i>       | 27493010                       | (G/T)       |
| 6635        | CakSNP6635     | <i>Kabuli</i>    | <i>Ca_Kabuli_Chr04</i>       | 27613450                       | (C/T)       |
| 6636        | CakSNP6636     | <i>Kabuli</i>    | <i>Ca_Kabuli_Chr04</i>       | 27617803                       | (A/G)       |
| 6637        | CakSNP6637     | <i>Kabuli</i>    | <i>Ca_Kabuli_Chr04</i>       | 27626559                       | (G/A)       |
| 6638        | CakSNP6638     | <i>Kabuli</i>    | <i>Ca_Kabuli_Chr04</i>       | 27626999                       | (C/T)       |
| 6639        | CakSNP6639     | <i>Kabuli</i>    | <i>Ca_Kabuli_Chr04</i>       | 27661241                       | (T/G)       |
| 6640        | CakSNP6640     | <i>Kabuli</i>    | <i>Ca_Kabuli_Chr04</i>       | 27669829                       | (C/G)       |
| 6641        | CakSNP6641     | <i>Kabuli</i>    | <i>Ca_Kabuli_Chr04</i>       | 27777968                       | (A/C)       |
| 6642        | CakSNP6642     | <i>Kabuli</i>    | <i>Ca_Kabuli_Chr04</i>       | 27786162                       | (G/C)       |
| 6643        | CakSNP6643     | <i>Kabuli</i>    | <i>Ca_Kabuli_Chr04</i>       | 27970989                       | (T/G)       |
| 6644        | CakSNP6644     | <i>Kabuli</i>    | <i>Ca_Kabuli_Chr04</i>       | 28061002                       | (A/C)       |
| 6645        | CakSNP6645     | <i>Kabuli</i>    | <i>Ca_Kabuli_Chr04</i>       | 28092609                       | (G/A)       |
| 6646        | CakSNP6646     | <i>Kabuli</i>    | <i>Ca_Kabuli_Chr04</i>       | 28092727                       | (T/A)       |
| 6647        | CakSNP6647     | <i>Kabuli</i>    | <i>Ca_Kabuli_Chr04</i>       | 28092725                       | (T/G)       |
| 6648        | CakSNP6648     | <i>Kabuli</i>    | <i>Ca_Kabuli_Chr04</i>       | 28092724                       | (T/A)       |
| 6649        | CakSNP6649     | <i>Kabuli</i>    | <i>Ca_Kabuli_Chr04</i>       | 28268788                       | (G/A)       |
| 6650        | CakSNP6650     | <i>Kabuli</i>    | <i>Ca_Kabuli_Chr04</i>       | 28289900                       | (C/A)       |
| 6651        | CakSNP6651     | <i>Kabuli</i>    | <i>Ca_Kabuli_Chr04</i>       | 28299238                       | (G/A)       |
| 6652        | CakSNP6652     | <i>Kabuli</i>    | <i>Ca_Kabuli_Chr04</i>       | 28301853                       | (T/C)       |
| 6653        | CakSNP6653     | <i>Kabuli</i>    | <i>Ca_Kabuli_Chr04</i>       | 28423079                       | (T/C)       |
| 6654        | CakSNP6654     | <i>Kabuli</i>    | <i>Ca_Kabuli_Chr04</i>       | 28423140                       | (A/G)       |
| 6655        | CakSNP6655     | <i>Kabuli</i>    | <i>Ca_Kabuli_Chr04</i>       | 28431706                       | (G/A)       |
| 6656        | CakSNP6656     | <i>Kabuli</i>    | <i>Ca_Kabuli_Chr04</i>       | 28790085                       | (A/G)       |
| 6657        | CakSNP6657     | <i>Kabuli</i>    | <i>Ca_Kabuli_Chr04</i>       | 29582296                       | (C/T)       |
| 6658        | CakSNP6658     | <i>Kabuli</i>    | <i>Ca_Kabuli_Chr04</i>       | 29582289                       | (G/A)       |
| 6659        | CakSNP6659     | <i>Kabuli</i>    | <i>Ca_Kabuli_Chr04</i>       | 29582285                       | (C/A)       |
| 6660        | CakSNP6660     | <i>Kabuli</i>    | <i>Ca_Kabuli_Chr04</i>       | 29582282                       | (C/A)       |
| 6661        | CakSNP6661     | <i>Kabuli</i>    | <i>Ca_Kabuli_Chr04</i>       | 29582273                       | (G/A)       |
| 6662        | CakSNP6662     | <i>Kabuli</i>    | <i>Ca_Kabuli_Chr04</i>       | 29582268                       | (C/G)       |
| 6663        | CakSNP6663     | <i>Kabuli</i>    | <i>Ca_Kabuli_Chr04</i>       | 29582257                       | (G/A)       |
| 6664        | CakSNP6664     | <i>Kabuli</i>    | <i>Ca_Kabuli_Chr04</i>       | 29582255                       | (C/T)       |
| 6665        | CakSNP6665     | <i>Kabuli</i>    | <i>Ca_Kabuli_Chr04</i>       | 29582252                       | (G/A)       |
| 6666        | CakSNP6666     | <i>Kabuli</i>    | <i>Ca_Kabuli_Chr04</i>       | 29582249                       | (C/T)       |
| 6667        | CakSNP6667     | <i>Kabuli</i>    | <i>Ca_Kabuli_Chr04</i>       | 29582235                       | (T/A)       |

| <b>S.N.</b> | <b>SNP IDs</b> | <b>Cultivars</b> | <b>Chromosomes/scaffolds</b> | <b>Physical positions (bp)</b> | <b>SNPs</b> |
|-------------|----------------|------------------|------------------------------|--------------------------------|-------------|
| 6668        | CakSNP6668     | <i>Kabuli</i>    | <i>Ca_Kabuli_Chr04</i>       | 29582232                       | (C/T)       |
| 6669        | CakSNP6669     | <i>Kabuli</i>    | <i>Ca_Kabuli_Chr04</i>       | 29582227                       | (G/A)       |
| 6670        | CakSNP6670     | <i>Kabuli</i>    | <i>Ca_Kabuli_Chr04</i>       | 29582219                       | (A/C)       |
| 6671        | CakSNP6671     | <i>Kabuli</i>    | <i>Ca_Kabuli_Chr04</i>       | 29582271                       | (C/T)       |
| 6672        | CakSNP6672     | <i>Kabuli</i>    | <i>Ca_Kabuli_Chr04</i>       | 29582286                       | (T/A)       |
| 6673        | CakSNP6673     | <i>Kabuli</i>    | <i>Ca_Kabuli_Chr04</i>       | 29582294                       | (G/A)       |
| 6674        | CakSNP6674     | <i>Kabuli</i>    | <i>Ca_Kabuli_Chr04</i>       | 29582301                       | (G/T)       |
| 6675        | CakSNP6675     | <i>Kabuli</i>    | <i>Ca_Kabuli_Chr04</i>       | 29671563                       | (G/A)       |
| 6676        | CakSNP6676     | <i>Kabuli</i>    | <i>Ca_Kabuli_Chr04</i>       | 29671606                       | (A/G)       |
| 6677        | CakSNP6677     | <i>Kabuli</i>    | <i>Ca_Kabuli_Chr04</i>       | 29683718                       | (A/T)       |
| 6678        | CakSNP6678     | <i>Kabuli</i>    | <i>Ca_Kabuli_Chr04</i>       | 29923380                       | (G/A)       |
| 6679        | CakSNP6679     | <i>Kabuli</i>    | <i>Ca_Kabuli_Chr04</i>       | 29958122                       | (T/G)       |
| 6680        | CakSNP6680     | <i>Kabuli</i>    | <i>Ca_Kabuli_Chr04</i>       | 29958113                       | (G/A)       |
| 6681        | CakSNP6681     | <i>Kabuli</i>    | <i>Ca_Kabuli_Chr04</i>       | 29972268                       | (T/G)       |
| 6682        | CakSNP6682     | <i>Kabuli</i>    | <i>Ca_Kabuli_Chr04</i>       | 30066903                       | (G/A)       |
| 6683        | CakSNP6683     | <i>Kabuli</i>    | <i>Ca_Kabuli_Chr04</i>       | 30153390                       | (G/A)       |
| 6684        | CakSNP6684     | <i>Kabuli</i>    | <i>Ca_Kabuli_Chr04</i>       | 30153448                       | (T/C)       |
| 6685        | CakSNP6685     | <i>Kabuli</i>    | <i>Ca_Kabuli_Chr04</i>       | 30153505                       | (C/G)       |
| 6686        | CakSNP6686     | <i>Kabuli</i>    | <i>Ca_Kabuli_Chr04</i>       | 30258044                       | (A/T)       |
| 6687        | CakSNP6687     | <i>Kabuli</i>    | <i>Ca_Kabuli_Chr04</i>       | 30258045                       | (A/T)       |
| 6688        | CakSNP6688     | <i>Kabuli</i>    | <i>Ca_Kabuli_Chr04</i>       | 30258056                       | (A/G)       |
| 6689        | CakSNP6689     | <i>Kabuli</i>    | <i>Ca_Kabuli_Chr04</i>       | 30258484                       | (G/C)       |
| 6690        | CakSNP6690     | <i>Kabuli</i>    | <i>Ca_Kabuli_Chr04</i>       | 30258613                       | (C/A)       |
| 6691        | CakSNP6691     | <i>Kabuli</i>    | <i>Ca_Kabuli_Chr04</i>       | 30258607                       | (C/A)       |
| 6692        | CakSNP6692     | <i>Kabuli</i>    | <i>Ca_Kabuli_Chr04</i>       | 30258604                       | (C/A)       |
| 6693        | CakSNP6693     | <i>Kabuli</i>    | <i>Ca_Kabuli_Chr04</i>       | 30258596                       | (G/C)       |
| 6694        | CakSNP6694     | <i>Kabuli</i>    | <i>Ca_Kabuli_Chr04</i>       | 30258567                       | (C/A)       |
| 6695        | CakSNP6695     | <i>Kabuli</i>    | <i>Ca_Kabuli_Chr04</i>       | 30260485                       | (C/A)       |
| 6696        | CakSNP6696     | <i>Kabuli</i>    | <i>Ca_Kabuli_Chr04</i>       | 30281991                       | (A/G)       |
| 6697        | CakSNP6697     | <i>Kabuli</i>    | <i>Ca_Kabuli_Chr04</i>       | 30301002                       | (T/G)       |
| 6698        | CakSNP6698     | <i>Kabuli</i>    | <i>Ca_Kabuli_Chr04</i>       | 30308719                       | (A/C)       |
| 6699        | CakSNP6699     | <i>Kabuli</i>    | <i>Ca_Kabuli_Chr04</i>       | 30308812                       | (G/A)       |
| 6700        | CakSNP6700     | <i>Kabuli</i>    | <i>Ca_Kabuli_Chr04</i>       | 30308788                       | (T/C)       |
| 6701        | CakSNP6701     | <i>Kabuli</i>    | <i>Ca_Kabuli_Chr04</i>       | 30463063                       | (T/C)       |
| 6702        | CakSNP6702     | <i>Kabuli</i>    | <i>Ca_Kabuli_Chr04</i>       | 30463117                       | (C/A)       |
| 6703        | CakSNP6703     | <i>Kabuli</i>    | <i>Ca_Kabuli_Chr04</i>       | 30599096                       | (C/A)       |
| 6704        | CakSNP6704     | <i>Kabuli</i>    | <i>Ca_Kabuli_Chr04</i>       | 30599188                       | (C/T)       |
| 6705        | CakSNP6705     | <i>Kabuli</i>    | <i>Ca_Kabuli_Chr04</i>       | 30667916                       | (G/A)       |
| 6706        | CakSNP6706     | <i>Kabuli</i>    | <i>Ca_Kabuli_Chr04</i>       | 30668893                       | (A/C)       |

| <b>S.N.</b> | <b>SNP IDs</b> | <b>Cultivars</b> | <b>Chromosomes/scaffolds</b> | <b>Physical positions (bp)</b> | <b>SNPs</b> |
|-------------|----------------|------------------|------------------------------|--------------------------------|-------------|
| 6707        | CakSNP6707     | <i>Kabuli</i>    | <i>Ca_Kabuli_Chr04</i>       | 30851027                       | (A/T)       |
| 6708        | CakSNP6708     | <i>Kabuli</i>    | <i>Ca_Kabuli_Chr04</i>       | 30851411                       | (T/G)       |
| 6709        | CakSNP6709     | <i>Kabuli</i>    | <i>Ca_Kabuli_Chr04</i>       | 30851840                       | (A/T)       |
| 6710        | CakSNP6710     | <i>Kabuli</i>    | <i>Ca_Kabuli_Chr04</i>       | 30931586                       | (G/T)       |
| 6711        | CakSNP6711     | <i>Kabuli</i>    | <i>Ca_Kabuli_Chr04</i>       | 31218647                       | (T/C)       |
| 6712        | CakSNP6712     | <i>Kabuli</i>    | <i>Ca_Kabuli_Chr04</i>       | 31221264                       | (T/G)       |
| 6713        | CakSNP6713     | <i>Kabuli</i>    | <i>Ca_Kabuli_Chr04</i>       | 31221253                       | (G/A)       |
| 6714        | CakSNP6714     | <i>Kabuli</i>    | <i>Ca_Kabuli_Chr04</i>       | 31221226                       | (T/A)       |
| 6715        | CakSNP6715     | <i>Kabuli</i>    | <i>Ca_Kabuli_Chr04</i>       | 31224001                       | (G/A)       |
| 6716        | CakSNP6716     | <i>Kabuli</i>    | <i>Ca_Kabuli_Chr04</i>       | 31262596                       | (T/A)       |
| 6717        | CakSNP6717     | <i>Kabuli</i>    | <i>Ca_Kabuli_Chr04</i>       | 31263205                       | (T/A)       |
| 6718        | CakSNP6718     | <i>Kabuli</i>    | <i>Ca_Kabuli_Chr04</i>       | 31594126                       | (A/C)       |
| 6719        | CakSNP6719     | <i>Kabuli</i>    | <i>Ca_Kabuli_Chr04</i>       | 31618949                       | (T/A)       |
| 6720        | CakSNP6720     | <i>Kabuli</i>    | <i>Ca_Kabuli_Chr04</i>       | 31875713                       | (A/G)       |
| 6721        | CakSNP6721     | <i>Kabuli</i>    | <i>Ca_Kabuli_Chr04</i>       | 31987890                       | (A/C)       |
| 6722        | CakSNP6722     | <i>Kabuli</i>    | <i>Ca_Kabuli_Chr04</i>       | 32042488                       | (T/G)       |
| 6723        | CakSNP6723     | <i>Kabuli</i>    | <i>Ca_Kabuli_Chr04</i>       | 32042527                       | (C/T)       |
| 6724        | CakSNP6724     | <i>Kabuli</i>    | <i>Ca_Kabuli_Chr04</i>       | 32068961                       | (A/G)       |
| 6725        | CakSNP6725     | <i>Kabuli</i>    | <i>Ca_Kabuli_Chr04</i>       | 32073552                       | (T/C)       |
| 6726        | CakSNP6726     | <i>Kabuli</i>    | <i>Ca_Kabuli_Chr04</i>       | 32073550                       | (C/G)       |
| 6727        | CakSNP6727     | <i>Kabuli</i>    | <i>Ca_Kabuli_Chr04</i>       | 32073549                       | (G/C)       |
| 6728        | CakSNP6728     | <i>Kabuli</i>    | <i>Ca_Kabuli_Chr04</i>       | 32166559                       | (C/G)       |
| 6729        | CakSNP6729     | <i>Kabuli</i>    | <i>Ca_Kabuli_Chr04</i>       | 32166557                       | (T/A)       |
| 6730        | CakSNP6730     | <i>Kabuli</i>    | <i>Ca_Kabuli_Chr04</i>       | 32183307                       | (C/G)       |
| 6731        | CakSNP6731     | <i>Kabuli</i>    | <i>Ca_Kabuli_Chr04</i>       | 32184628                       | (A/G)       |
| 6732        | CakSNP6732     | <i>Kabuli</i>    | <i>Ca_Kabuli_Chr04</i>       | 32212899                       | (G/A)       |
| 6733        | CakSNP6733     | <i>Kabuli</i>    | <i>Ca_Kabuli_Chr04</i>       | 32297780                       | (C/A)       |
| 6734        | CakSNP6734     | <i>Kabuli</i>    | <i>Ca_Kabuli_Chr04</i>       | 32297758                       | (G/A)       |
| 6735        | CakSNP6735     | <i>Kabuli</i>    | <i>Ca_Kabuli_Chr04</i>       | 32297734                       | (A/G)       |
| 6736        | CakSNP6736     | <i>Kabuli</i>    | <i>Ca_Kabuli_Chr04</i>       | 32303394                       | (C/T)       |
| 6737        | CakSNP6737     | <i>Kabuli</i>    | <i>Ca_Kabuli_Chr04</i>       | 32429228                       | (A/T)       |
| 6738        | CakSNP6738     | <i>Kabuli</i>    | <i>Ca_Kabuli_Chr04</i>       | 32429222                       | (A/C)       |
| 6739        | CakSNP6739     | <i>Kabuli</i>    | <i>Ca_Kabuli_Chr04</i>       | 32521346                       | (T/C)       |
| 6740        | CakSNP6740     | <i>Kabuli</i>    | <i>Ca_Kabuli_Chr04</i>       | 32602658                       | (C/T)       |
| 6741        | CakSNP6741     | <i>Kabuli</i>    | <i>Ca_Kabuli_Chr04</i>       | 32604261                       | (G/A)       |
| 6742        | CakSNP6742     | <i>Kabuli</i>    | <i>Ca_Kabuli_Chr04</i>       | 32604538                       | (T/C)       |
| 6743        | CakSNP6743     | <i>Kabuli</i>    | <i>Ca_Kabuli_Chr04</i>       | 32604510                       | (A/C)       |
| 6744        | CakSNP6744     | <i>Kabuli</i>    | <i>Ca_Kabuli_Chr04</i>       | 32636315                       | (T/C)       |
| 6745        | CakSNP6745     | <i>Kabuli</i>    | <i>Ca_Kabuli_Chr04</i>       | 32636276                       | (T/C)       |

| <b>S.N.</b> | <b>SNP IDs</b> | <b>Cultivars</b> | <b>Chromosomes/scaffolds</b> | <b>Physical positions (bp)</b> | <b>SNPs</b> |
|-------------|----------------|------------------|------------------------------|--------------------------------|-------------|
| 6746        | CakSNP6746     | Kabuli           | Ca_Kabuli_Ch04               | 32636428                       | (C/A)       |
| 6747        | CakSNP6747     | Kabuli           | Ca_Kabuli_Ch04               | 32636459                       | (A/G)       |
| 6748        | CakSNP6748     | Kabuli           | Ca_Kabuli_Ch04               | 32636690                       | (C/T)       |
| 6749        | CakSNP6749     | Kabuli           | Ca_Kabuli_Ch04               | 32636953                       | (A/G)       |
| 6750        | CakSNP6750     | Kabuli           | Ca_Kabuli_Ch04               | 32639121                       | (C/T)       |
| 6751        | CakSNP6751     | Kabuli           | Ca_Kabuli_Ch04               | 32639188                       | (C/G)       |
| 6752        | CakSNP6752     | Kabuli           | Ca_Kabuli_Ch04               | 32639118                       | (A/C)       |
| 6753        | CakSNP6753     | Kabuli           | Ca_Kabuli_Ch04               | 32639262                       | (A/G)       |
| 6754        | CakSNP6754     | Kabuli           | Ca_Kabuli_Ch04               | 32639315                       | (A/G)       |
| 6755        | CakSNP6755     | Kabuli           | Ca_Kabuli_Ch04               | 32639654                       | (T/C)       |
| 6756        | CakSNP6756     | Kabuli           | Ca_Kabuli_Ch04               | 32639681                       | (C/T)       |
| 6757        | CakSNP6757     | Kabuli           | Ca_Kabuli_Ch04               | 32639770                       | (C/G)       |
| 6758        | CakSNP6758     | Kabuli           | Ca_Kabuli_Ch04               | 32640911                       | (A/G)       |
| 6759        | CakSNP6759     | Kabuli           | Ca_Kabuli_Ch04               | 32853834                       | (T/C)       |
| 6760        | CakSNP6760     | Kabuli           | Ca_Kabuli_Ch04               | 32853838                       | (G/T)       |
| 6761        | CakSNP6761     | Kabuli           | Ca_Kabuli_Ch04               | 33068276                       | (G/A)       |
| 6762        | CakSNP6762     | Kabuli           | Ca_Kabuli_Ch04               | 33221361                       | (T/C)       |
| 6763        | CakSNP6763     | Kabuli           | Ca_Kabuli_Ch04               | 33221371                       | (T/C)       |
| 6764        | CakSNP6764     | Kabuli           | Ca_Kabuli_Ch04               | 33221397                       | (T/G)       |
| 6765        | CakSNP6765     | Kabuli           | Ca_Kabuli_Ch04               | 33509759                       | (A/C)       |
| 6766        | CakSNP6766     | Kabuli           | Ca_Kabuli_Ch04               | 33509762                       | (G/A)       |
| 6767        | CakSNP6767     | Kabuli           | Ca_Kabuli_Ch04               | 33509804                       | (A/G)       |
| 6768        | CakSNP6768     | Kabuli           | Ca_Kabuli_Ch04               | 33641757                       | (C/T)       |
| 6769        | CakSNP6769     | Kabuli           | Ca_Kabuli_Ch04               | 33820657                       | (A/C)       |
| 6770        | CakSNP6770     | Kabuli           | Ca_Kabuli_Ch04               | 33874346                       | (T/C)       |
| 6771        | CakSNP6771     | Kabuli           | Ca_Kabuli_Ch04               | 33874327                       | (T/C)       |
| 6772        | CakSNP6772     | Kabuli           | Ca_Kabuli_Ch04               | 33874313                       | (G/A)       |
| 6773        | CakSNP6773     | Kabuli           | Ca_Kabuli_Ch04               | 33929598                       | (A/C)       |
| 6774        | CakSNP6774     | Kabuli           | Ca_Kabuli_Ch04               | 33929777                       | (C/T)       |
| 6775        | CakSNP6775     | Kabuli           | Ca_Kabuli_Ch04               | 34032176                       | (C/T)       |
| 6776        | CakSNP6776     | Kabuli           | Ca_Kabuli_Ch04               | 34155135                       | (A/C)       |
| 6777        | CakSNP6777     | Kabuli           | Ca_Kabuli_Ch04               | 34155131                       | (T/A)       |
| 6778        | CakSNP6778     | Kabuli           | Ca_Kabuli_Ch04               | 34155128                       | (C/T)       |
| 6779        | CakSNP6779     | Kabuli           | Ca_Kabuli_Ch04               | 34155127                       | (G/A)       |
| 6780        | CakSNP6780     | Kabuli           | Ca_Kabuli_Ch04               | 34155124                       | (G/A)       |
| 6781        | CakSNP6781     | Kabuli           | Ca_Kabuli_Ch04               | 34155084                       | (C/G)       |
| 6782        | CakSNP6782     | Kabuli           | Ca_Kabuli_Ch04               | 34155083                       | (C/T)       |
| 6783        | CakSNP6783     | Kabuli           | Ca_Kabuli_Ch04               | 34222792                       | (G/C)       |
| 6784        | CakSNP6784     | Kabuli           | Ca_Kabuli_Ch04               | 34354519                       | (G/T)       |

| <b>S.N.</b> | <b>SNP IDs</b> | <b>Cultivars</b> | <b>Chromosomes/scaffolds</b> | <b>Physical positions (bp)</b> | <b>SNPs</b> |
|-------------|----------------|------------------|------------------------------|--------------------------------|-------------|
| 6785        | CakSNP6785     | <i>Kabuli</i>    | <i>Ca_Kabuli_Chr04</i>       | 34487064                       | (T/G)       |
| 6786        | CakSNP6786     | <i>Kabuli</i>    | <i>Ca_Kabuli_Chr04</i>       | 34744344                       | (T/G)       |
| 6787        | CakSNP6787     | <i>Kabuli</i>    | <i>Ca_Kabuli_Chr04</i>       | 34744398                       | (T/A)       |
| 6788        | CakSNP6788     | <i>Kabuli</i>    | <i>Ca_Kabuli_Chr04</i>       | 34784285                       | (G/A)       |
| 6789        | CakSNP6789     | <i>Kabuli</i>    | <i>Ca_Kabuli_Chr04</i>       | 34798597                       | (C/A)       |
| 6790        | CakSNP6790     | <i>Kabuli</i>    | <i>Ca_Kabuli_Chr04</i>       | 34916032                       | (C/T)       |
| 6791        | CakSNP6791     | <i>Kabuli</i>    | <i>Ca_Kabuli_Chr04</i>       | 34924575                       | (C/T)       |
| 6792        | CakSNP6792     | <i>Kabuli</i>    | <i>Ca_Kabuli_Chr04</i>       | 34955953                       | (A/G)       |
| 6793        | CakSNP6793     | <i>Kabuli</i>    | <i>Ca_Kabuli_Chr04</i>       | 34955971                       | (A/T)       |
| 6794        | CakSNP6794     | <i>Kabuli</i>    | <i>Ca_Kabuli_Chr04</i>       | 34956006                       | (C/T)       |
| 6795        | CakSNP6795     | <i>Kabuli</i>    | <i>Ca_Kabuli_Chr04</i>       | 34956019                       | (G/A)       |
| 6796        | CakSNP6796     | <i>Kabuli</i>    | <i>Ca_Kabuli_Chr04</i>       | 34956035                       | (C/T)       |
| 6797        | CakSNP6797     | <i>Kabuli</i>    | <i>Ca_Kabuli_Chr04</i>       | 34956111                       | (G/T)       |
| 6798        | CakSNP6798     | <i>Kabuli</i>    | <i>Ca_Kabuli_Chr04</i>       | 34956031                       | (G/A)       |
| 6799        | CakSNP6799     | <i>Kabuli</i>    | <i>Ca_Kabuli_Chr04</i>       | 35141281                       | (A/T)       |
| 6800        | CakSNP6800     | <i>Kabuli</i>    | <i>Ca_Kabuli_Chr04</i>       | 35141309                       | (A/C)       |
| 6801        | CakSNP6801     | <i>Kabuli</i>    | <i>Ca_Kabuli_Chr04</i>       | 35141340                       | (G/A)       |
| 6802        | CakSNP6802     | <i>Kabuli</i>    | <i>Ca_Kabuli_Chr04</i>       | 35141353                       | (C/G)       |
| 6803        | CakSNP6803     | <i>Kabuli</i>    | <i>Ca_Kabuli_Chr04</i>       | 35141359                       | (C/G)       |
| 6804        | CakSNP6804     | <i>Kabuli</i>    | <i>Ca_Kabuli_Chr04</i>       | 35141375                       | (A/G)       |
| 6805        | CakSNP6805     | <i>Kabuli</i>    | <i>Ca_Kabuli_Chr04</i>       | 35141403                       | (C/T)       |
| 6806        | CakSNP6806     | <i>Kabuli</i>    | <i>Ca_Kabuli_Chr04</i>       | 35141425                       | (A/T)       |
| 6807        | CakSNP6807     | <i>Kabuli</i>    | <i>Ca_Kabuli_Chr04</i>       | 35141421                       | (T/A)       |
| 6808        | CakSNP6808     | <i>Kabuli</i>    | <i>Ca_Kabuli_Chr04</i>       | 35141408                       | (A/G)       |
| 6809        | CakSNP6809     | <i>Kabuli</i>    | <i>Ca_Kabuli_Chr04</i>       | 35168915                       | (C/T)       |
| 6810        | CakSNP6810     | <i>Kabuli</i>    | <i>Ca_Kabuli_Chr04</i>       | 35168939                       | (C/T)       |
| 6811        | CakSNP6811     | <i>Kabuli</i>    | <i>Ca_Kabuli_Chr04</i>       | 35229966                       | (C/T)       |
| 6812        | CakSNP6812     | <i>Kabuli</i>    | <i>Ca_Kabuli_Chr04</i>       | 35230144                       | (A/G)       |
| 6813        | CakSNP6813     | <i>Kabuli</i>    | <i>Ca_Kabuli_Chr04</i>       | 35231891                       | (C/T)       |
| 6814        | CakSNP6814     | <i>Kabuli</i>    | <i>Ca_Kabuli_Chr04</i>       | 35304102                       | (C/T)       |
| 6815        | CakSNP6815     | <i>Kabuli</i>    | <i>Ca_Kabuli_Chr04</i>       | 35304108                       | (C/A)       |
| 6816        | CakSNP6816     | <i>Kabuli</i>    | <i>Ca_Kabuli_Chr04</i>       | 35309709                       | (A/G)       |
| 6817        | CakSNP6817     | <i>Kabuli</i>    | <i>Ca_Kabuli_Chr04</i>       | 35311815                       | (A/C)       |
| 6818        | CakSNP6818     | <i>Kabuli</i>    | <i>Ca_Kabuli_Chr04</i>       | 35337282                       | (A/G)       |
| 6819        | CakSNP6819     | <i>Kabuli</i>    | <i>Ca_Kabuli_Chr04</i>       | 35344356                       | (A/G)       |
| 6820        | CakSNP6820     | <i>Kabuli</i>    | <i>Ca_Kabuli_Chr04</i>       | 35344353                       | (T/C)       |
| 6821        | CakSNP6821     | <i>Kabuli</i>    | <i>Ca_Kabuli_Chr04</i>       | 35344323                       | (C/T)       |
| 6822        | CakSNP6822     | <i>Kabuli</i>    | <i>Ca_Kabuli_Chr04</i>       | 35346415                       | (G/A)       |
| 6823        | CakSNP6823     | <i>Kabuli</i>    | <i>Ca_Kabuli_Chr04</i>       | 35346417                       | (C/T)       |



| <b>S.N.</b> | <b>SNP IDs</b> | <b>Cultivars</b> | <b>Chromosomes/scaffolds</b> | <b>Physical positions (bp)</b> | <b>SNPs</b> |
|-------------|----------------|------------------|------------------------------|--------------------------------|-------------|
| 6824        | CakSNP6824     | <i>Kabuli</i>    | <i>Ca_Kabuli_Chr04</i>       | 35346495                       | (C/T)       |
| 6825        | CakSNP6825     | <i>Kabuli</i>    | <i>Ca_Kabuli_Chr04</i>       | 35346465                       | (G/T)       |
| 6826        | CakSNP6826     | <i>Kabuli</i>    | <i>Ca_Kabuli_Chr04</i>       | 35346558                       | (G/T)       |
| 6827        | CakSNP6827     | <i>Kabuli</i>    | <i>Ca_Kabuli_Chr04</i>       | 35346563                       | (G/T)       |
| 6828        | CakSNP6828     | <i>Kabuli</i>    | <i>Ca_Kabuli_Chr04</i>       | 35346573                       | (A/G)       |
| 6829        | CakSNP6829     | <i>Kabuli</i>    | <i>Ca_Kabuli_Chr04</i>       | 35346576                       | (C/G)       |
| 6830        | CakSNP6830     | <i>Kabuli</i>    | <i>Ca_Kabuli_Chr04</i>       | 35346624                       | (G/A)       |
| 6831        | CakSNP6831     | <i>Kabuli</i>    | <i>Ca_Kabuli_Chr04</i>       | 35393505                       | (G/T)       |
| 6832        | CakSNP6832     | <i>Kabuli</i>    | <i>Ca_Kabuli_Chr04</i>       | 35393643                       | (G/A)       |
| 6833        | CakSNP6833     | <i>Kabuli</i>    | <i>Ca_Kabuli_Chr04</i>       | 35455095                       | (A/C)       |
| 6834        | CakSNP6834     | <i>Kabuli</i>    | <i>Ca_Kabuli_Chr04</i>       | 35455062                       | (A/T)       |
| 6835        | CakSNP6835     | <i>Kabuli</i>    | <i>Ca_Kabuli_Chr04</i>       | 35455708                       | (G/A)       |
| 6836        | CakSNP6836     | <i>Kabuli</i>    | <i>Ca_Kabuli_Chr04</i>       | 35469308                       | (T/G)       |
| 6837        | CakSNP6837     | <i>Kabuli</i>    | <i>Ca_Kabuli_Chr04</i>       | 35469304                       | (G/A)       |
| 6838        | CakSNP6838     | <i>Kabuli</i>    | <i>Ca_Kabuli_Chr04</i>       | 35487504                       | (G/C)       |
| 6839        | CakSNP6839     | <i>Kabuli</i>    | <i>Ca_Kabuli_Chr04</i>       | 35487496                       | (C/A)       |
| 6840        | CakSNP6840     | <i>Kabuli</i>    | <i>Ca_Kabuli_Chr04</i>       | 35487471                       | (A/C)       |
| 6841        | CakSNP6841     | <i>Kabuli</i>    | <i>Ca_Kabuli_Chr04</i>       | 35528758                       | (C/A)       |
| 6842        | CakSNP6842     | <i>Kabuli</i>    | <i>Ca_Kabuli_Chr04</i>       | 35534777                       | (G/C)       |
| 6843        | CakSNP6843     | <i>Kabuli</i>    | <i>Ca_Kabuli_Chr04</i>       | 35534877                       | (T/C)       |
| 6844        | CakSNP6844     | <i>Kabuli</i>    | <i>Ca_Kabuli_Chr04</i>       | 35534891                       | (C/T)       |
| 6845        | CakSNP6845     | <i>Kabuli</i>    | <i>Ca_Kabuli_Chr04</i>       | 35574379                       | (C/A)       |
| 6846        | CakSNP6846     | <i>Kabuli</i>    | <i>Ca_Kabuli_Chr04</i>       | 35634712                       | (A/G)       |
| 6847        | CakSNP6847     | <i>Kabuli</i>    | <i>Ca_Kabuli_Chr04</i>       | 35634751                       | (A/G)       |
| 6848        | CakSNP6848     | <i>Kabuli</i>    | <i>Ca_Kabuli_Chr04</i>       | 35634873                       | (G/T)       |
| 6849        | CakSNP6849     | <i>Kabuli</i>    | <i>Ca_Kabuli_Chr04</i>       | 35961593                       | (A/C)       |
| 6850        | CakSNP6850     | <i>Kabuli</i>    | <i>Ca_Kabuli_Chr04</i>       | 35977422                       | (G/A)       |
| 6851        | CakSNP6851     | <i>Kabuli</i>    | <i>Ca_Kabuli_Chr04</i>       | 36005847                       | (T/G)       |
| 6852        | CakSNP6852     | <i>Kabuli</i>    | <i>Ca_Kabuli_Chr04</i>       | 36010756                       | (T/G)       |
| 6853        | CakSNP6853     | <i>Kabuli</i>    | <i>Ca_Kabuli_Chr04</i>       | 36153818                       | (A/G)       |
| 6854        | CakSNP6854     | <i>Kabuli</i>    | <i>Ca_Kabuli_Chr04</i>       | 36154771                       | (T/C)       |
| 6855        | CakSNP6855     | <i>Kabuli</i>    | <i>Ca_Kabuli_Chr04</i>       | 36154820                       | (G/A)       |
| 6856        | CakSNP6856     | <i>Kabuli</i>    | <i>Ca_Kabuli_Chr04</i>       | 36154822                       | (T/G)       |
| 6857        | CakSNP6857     | <i>Kabuli</i>    | <i>Ca_Kabuli_Chr04</i>       | 36184969                       | (A/G)       |
| 6858        | CakSNP6858     | <i>Kabuli</i>    | <i>Ca_Kabuli_Chr04</i>       | 36277383                       | (C/T)       |
| 6859        | CakSNP6859     | <i>Kabuli</i>    | <i>Ca_Kabuli_Chr04</i>       | 36368713                       | (T/C)       |
| 6860        | CakSNP6860     | <i>Kabuli</i>    | <i>Ca_Kabuli_Chr04</i>       | 36445345                       | (G/A)       |
| 6861        | CakSNP6861     | <i>Kabuli</i>    | <i>Ca_Kabuli_Chr04</i>       | 36445367                       | (A/G)       |
| 6862        | CakSNP6862     | <i>Kabuli</i>    | <i>Ca_Kabuli_Chr04</i>       | 36449101                       | (C/T)       |

| <b>S.N.</b> | <b>SNP IDs</b> | <b>Cultivars</b> | <b>Chromosomes/scaffolds</b> | <b>Physical positions (bp)</b> | <b>SNPs</b> |
|-------------|----------------|------------------|------------------------------|--------------------------------|-------------|
| 6863        | CakSNP6863     | <i>Kabuli</i>    | <i>Ca_Kabuli_Chr04</i>       | 36461836                       | (A/G)       |
| 6864        | CakSNP6864     | <i>Kabuli</i>    | <i>Ca_Kabuli_Chr04</i>       | 36467928                       | (C/T)       |
| 6865        | CakSNP6865     | <i>Kabuli</i>    | <i>Ca_Kabuli_Chr04</i>       | 36467943                       | (A/G)       |
| 6866        | CakSNP6866     | <i>Kabuli</i>    | <i>Ca_Kabuli_Chr04</i>       | 36467964                       | (G/A)       |
| 6867        | CakSNP6867     | <i>Kabuli</i>    | <i>Ca_Kabuli_Chr04</i>       | 36467967                       | (T/C)       |
| 6868        | CakSNP6868     | <i>Kabuli</i>    | <i>Ca_Kabuli_Chr04</i>       | 36467980                       | (C/A)       |
| 6869        | CakSNP6869     | <i>Kabuli</i>    | <i>Ca_Kabuli_Chr04</i>       | 36467988                       | (C/T)       |
| 6870        | CakSNP6870     | <i>Kabuli</i>    | <i>Ca_Kabuli_Chr04</i>       | 36467990                       | (T/G)       |
| 6871        | CakSNP6871     | <i>Kabuli</i>    | <i>Ca_Kabuli_Chr04</i>       | 36468003                       | (T/A)       |
| 6872        | CakSNP6872     | <i>Kabuli</i>    | <i>Ca_Kabuli_Chr04</i>       | 36468053                       | (A/G)       |
| 6873        | CakSNP6873     | <i>Kabuli</i>    | <i>Ca_Kabuli_Chr04</i>       | 36488966                       | (A/G)       |
| 6874        | CakSNP6874     | <i>Kabuli</i>    | <i>Ca_Kabuli_Chr04</i>       | 36537118                       | (C/T)       |
| 6875        | CakSNP6875     | <i>Kabuli</i>    | <i>Ca_Kabuli_Chr04</i>       | 36537124                       | (C/T)       |
| 6876        | CakSNP6876     | <i>Kabuli</i>    | <i>Ca_Kabuli_Chr04</i>       | 36537170                       | (C/T)       |
| 6877        | CakSNP6877     | <i>Kabuli</i>    | <i>Ca_Kabuli_Chr04</i>       | 36541088                       | (G/T)       |
| 6878        | CakSNP6878     | <i>Kabuli</i>    | <i>Ca_Kabuli_Chr04</i>       | 36541087                       | (T/C)       |
| 6879        | CakSNP6879     | <i>Kabuli</i>    | <i>Ca_Kabuli_Chr04</i>       | 36541083                       | (A/C)       |
| 6880        | CakSNP6880     | <i>Kabuli</i>    | <i>Ca_Kabuli_Chr04</i>       | 36639333                       | (A/T)       |
| 6881        | CakSNP6881     | <i>Kabuli</i>    | <i>Ca_Kabuli_Chr04</i>       | 36639382                       | (T/C)       |
| 6882        | CakSNP6882     | <i>Kabuli</i>    | <i>Ca_Kabuli_Chr04</i>       | 36639474                       | (G/C)       |
| 6883        | CakSNP6883     | <i>Kabuli</i>    | <i>Ca_Kabuli_Chr04</i>       | 36673677                       | (C/A)       |
| 6884        | CakSNP6884     | <i>Kabuli</i>    | <i>Ca_Kabuli_Chr04</i>       | 36682215                       | (G/A)       |
| 6885        | CakSNP6885     | <i>Kabuli</i>    | <i>Ca_Kabuli_Chr04</i>       | 36682213                       | (C/T)       |
| 6886        | CakSNP6886     | <i>Kabuli</i>    | <i>Ca_Kabuli_Chr04</i>       | 36682211                       | (G/A)       |
| 6887        | CakSNP6887     | <i>Kabuli</i>    | <i>Ca_Kabuli_Chr04</i>       | 36682253                       | (T/G)       |
| 6888        | CakSNP6888     | <i>Kabuli</i>    | <i>Ca_Kabuli_Chr04</i>       | 36682231                       | (G/T)       |
| 6889        | CakSNP6889     | <i>Kabuli</i>    | <i>Ca_Kabuli_Chr04</i>       | 36709731                       | (G/A)       |
| 6890        | CakSNP6890     | <i>Kabuli</i>    | <i>Ca_Kabuli_Chr04</i>       | 36754121                       | (T/C)       |
| 6891        | CakSNP6891     | <i>Kabuli</i>    | <i>Ca_Kabuli_Chr04</i>       | 36754149                       | (G/A)       |
| 6892        | CakSNP6892     | <i>Kabuli</i>    | <i>Ca_Kabuli_Chr04</i>       | 36754290                       | (T/A)       |
| 6893        | CakSNP6893     | <i>Kabuli</i>    | <i>Ca_Kabuli_Chr04</i>       | 36754378                       | (C/T)       |
| 6894        | CakSNP6894     | <i>Kabuli</i>    | <i>Ca_Kabuli_Chr04</i>       | 36754377                       | (T/A)       |
| 6895        | CakSNP6895     | <i>Kabuli</i>    | <i>Ca_Kabuli_Chr04</i>       | 36754348                       | (C/T)       |
| 6896        | CakSNP6896     | <i>Kabuli</i>    | <i>Ca_Kabuli_Chr04</i>       | 36754343                       | (A/C)       |
| 6897        | CakSNP6897     | <i>Kabuli</i>    | <i>Ca_Kabuli_Chr04</i>       | 36754327                       | (G/A)       |
| 6898        | CakSNP6898     | <i>Kabuli</i>    | <i>Ca_Kabuli_Chr04</i>       | 36754468                       | (G/A)       |
| 6899        | CakSNP6899     | <i>Kabuli</i>    | <i>Ca_Kabuli_Chr04</i>       | 36754453                       | (A/G)       |
| 6900        | CakSNP6900     | <i>Kabuli</i>    | <i>Ca_Kabuli_Chr04</i>       | 36799551                       | (C/T)       |
| 6901        | CakSNP6901     | <i>Kabuli</i>    | <i>Ca_Kabuli_Chr04</i>       | 36831035                       | (A/G)       |

| <b>S.N.</b> | <b>SNP IDs</b> | <b>Cultivars</b> | <b>Chromosomes/scaffolds</b> | <b>Physical positions (bp)</b> | <b>SNPs</b> |
|-------------|----------------|------------------|------------------------------|--------------------------------|-------------|
| 6902        | CakSNP6902     | <i>Kabuli</i>    | <i>Ca_Kabuli_Chr04</i>       | 36831199                       | (G/A)       |
| 6903        | CakSNP6903     | <i>Kabuli</i>    | <i>Ca_Kabuli_Chr04</i>       | 36831267                       | (A/C)       |
| 6904        | CakSNP6904     | <i>Kabuli</i>    | <i>Ca_Kabuli_Chr04</i>       | 36955706                       | (G/T)       |
| 6905        | CakSNP6905     | <i>Kabuli</i>    | <i>Ca_Kabuli_Chr04</i>       | 36977192                       | (C/T)       |
| 6906        | CakSNP6906     | <i>Kabuli</i>    | <i>Ca_Kabuli_Chr04</i>       | 36977194                       | (G/A)       |
| 6907        | CakSNP6907     | <i>Kabuli</i>    | <i>Ca_Kabuli_Chr04</i>       | 36979866                       | (T/G)       |
| 6908        | CakSNP6908     | <i>Kabuli</i>    | <i>Ca_Kabuli_Chr04</i>       | 36979926                       | (G/T)       |
| 6909        | CakSNP6909     | <i>Kabuli</i>    | <i>Ca_Kabuli_Chr04</i>       | 36979879                       | (C/T)       |
| 6910        | CakSNP6910     | <i>Kabuli</i>    | <i>Ca_Kabuli_Chr04</i>       | 36982955                       | (A/G)       |
| 6911        | CakSNP6911     | <i>Kabuli</i>    | <i>Ca_Kabuli_Chr04</i>       | 36984727                       | (C/G)       |
| 6912        | CakSNP6912     | <i>Kabuli</i>    | <i>Ca_Kabuli_Chr04</i>       | 36984829                       | (C/T)       |
| 6913        | CakSNP6913     | <i>Kabuli</i>    | <i>Ca_Kabuli_Chr04</i>       | 36984795                       | (T/A)       |
| 6914        | CakSNP6914     | <i>Kabuli</i>    | <i>Ca_Kabuli_Chr04</i>       | 36998201                       | (A/C)       |
| 6915        | CakSNP6915     | <i>Kabuli</i>    | <i>Ca_Kabuli_Chr04</i>       | 36998209                       | (C/T)       |
| 6916        | CakSNP6916     | <i>Kabuli</i>    | <i>Ca_Kabuli_Chr04</i>       | 37064588                       | (A/G)       |
| 6917        | CakSNP6917     | <i>Kabuli</i>    | <i>Ca_Kabuli_Chr04</i>       | 37064630                       | (G/A)       |
| 6918        | CakSNP6918     | <i>Kabuli</i>    | <i>Ca_Kabuli_Chr04</i>       | 37185576                       | (T/A)       |
| 6919        | CakSNP6919     | <i>Kabuli</i>    | <i>Ca_Kabuli_Chr04</i>       | 37185577                       | (T/A)       |
| 6920        | CakSNP6920     | <i>Kabuli</i>    | <i>Ca_Kabuli_Chr04</i>       | 37185578                       | (T/A)       |
| 6921        | CakSNP6921     | <i>Kabuli</i>    | <i>Ca_Kabuli_Chr04</i>       | 37237211                       | (G/A)       |
| 6922        | CakSNP6922     | <i>Kabuli</i>    | <i>Ca_Kabuli_Chr04</i>       | 37237276                       | (T/C)       |
| 6923        | CakSNP6923     | <i>Kabuli</i>    | <i>Ca_Kabuli_Chr04</i>       | 37241235                       | (A/G)       |
| 6924        | CakSNP6924     | <i>Kabuli</i>    | <i>Ca_Kabuli_Chr04</i>       | 37241262                       | (G/A)       |
| 6925        | CakSNP6925     | <i>Kabuli</i>    | <i>Ca_Kabuli_Chr04</i>       | 37260697                       | (T/C)       |
| 6926        | CakSNP6926     | <i>Kabuli</i>    | <i>Ca_Kabuli_Chr04</i>       | 37260873                       | (A/G)       |
| 6927        | CakSNP6927     | <i>Kabuli</i>    | <i>Ca_Kabuli_Chr04</i>       | 37260841                       | (T/A)       |
| 6928        | CakSNP6928     | <i>Kabuli</i>    | <i>Ca_Kabuli_Chr04</i>       | 37264628                       | (G/A)       |
| 6929        | CakSNP6929     | <i>Kabuli</i>    | <i>Ca_Kabuli_Chr04</i>       | 37286591                       | (T/A)       |
| 6930        | CakSNP6930     | <i>Kabuli</i>    | <i>Ca_Kabuli_Chr04</i>       | 37286625                       | (C/A)       |
| 6931        | CakSNP6931     | <i>Kabuli</i>    | <i>Ca_Kabuli_Chr04</i>       | 37286632                       | (G/A)       |
| 6932        | CakSNP6932     | <i>Kabuli</i>    | <i>Ca_Kabuli_Chr04</i>       | 37286663                       | (A/G)       |
| 6933        | CakSNP6933     | <i>Kabuli</i>    | <i>Ca_Kabuli_Chr04</i>       | 37293752                       | (G/A)       |
| 6934        | CakSNP6934     | <i>Kabuli</i>    | <i>Ca_Kabuli_Chr04</i>       | 37293780                       | (T/A)       |
| 6935        | CakSNP6935     | <i>Kabuli</i>    | <i>Ca_Kabuli_Chr04</i>       | 37293773                       | (A/T)       |
| 6936        | CakSNP6936     | <i>Kabuli</i>    | <i>Ca_Kabuli_Chr04</i>       | 37293769                       | (C/A)       |
| 6937        | CakSNP6937     | <i>Kabuli</i>    | <i>Ca_Kabuli_Chr04</i>       | 37294720                       | (A/G)       |
| 6938        | CakSNP6938     | <i>Kabuli</i>    | <i>Ca_Kabuli_Chr04</i>       | 37316574                       | (T/A)       |
| 6939        | CakSNP6939     | <i>Kabuli</i>    | <i>Ca_Kabuli_Chr04</i>       | 37316748                       | (T/A)       |
| 6940        | CakSNP6940     | <i>Kabuli</i>    | <i>Ca_Kabuli_Chr04</i>       | 37316738                       | (C/T)       |

| <b>S.N.</b> | <b>SNP IDs</b> | <b>Cultivars</b> | <b>Chromosomes/scaffolds</b> | <b>Physical positions (bp)</b> | <b>SNPs</b> |
|-------------|----------------|------------------|------------------------------|--------------------------------|-------------|
| 6941        | CakSNP6941     | <i>Kabuli</i>    | <i>Ca_Kabuli_Chr04</i>       | 37316713                       | (A/T)       |
| 6942        | CakSNP6942     | <i>Kabuli</i>    | <i>Ca_Kabuli_Chr04</i>       | 37316700                       | (C/A)       |
| 6943        | CakSNP6943     | <i>Kabuli</i>    | <i>Ca_Kabuli_Chr04</i>       | 37349071                       | (T/C)       |
| 6944        | CakSNP6944     | <i>Kabuli</i>    | <i>Ca_Kabuli_Chr04</i>       | 37349212                       | (A/C)       |
| 6945        | CakSNP6945     | <i>Kabuli</i>    | <i>Ca_Kabuli_Chr04</i>       | 37349239                       | (C/G)       |
| 6946        | CakSNP6946     | <i>Kabuli</i>    | <i>Ca_Kabuli_Chr04</i>       | 37349304                       | (T/C)       |
| 6947        | CakSNP6947     | <i>Kabuli</i>    | <i>Ca_Kabuli_Chr04</i>       | 37349331                       | (C/T)       |
| 6948        | CakSNP6948     | <i>Kabuli</i>    | <i>Ca_Kabuli_Chr04</i>       | 37349321                       | (T/C)       |
| 6949        | CakSNP6949     | <i>Kabuli</i>    | <i>Ca_Kabuli_Chr04</i>       | 37356865                       | (C/A)       |
| 6950        | CakSNP6950     | <i>Kabuli</i>    | <i>Ca_Kabuli_Chr04</i>       | 37356889                       | (C/T)       |
| 6951        | CakSNP6951     | <i>Kabuli</i>    | <i>Ca_Kabuli_Chr04</i>       | 37356892                       | (C/T)       |
| 6952        | CakSNP6952     | <i>Kabuli</i>    | <i>Ca_Kabuli_Chr04</i>       | 37356919                       | (A/T)       |
| 6953        | CakSNP6953     | <i>Kabuli</i>    | <i>Ca_Kabuli_Chr04</i>       | 37356951                       | (C/T)       |
| 6954        | CakSNP6954     | <i>Kabuli</i>    | <i>Ca_Kabuli_Chr04</i>       | 37364980                       | (G/A)       |
| 6955        | CakSNP6955     | <i>Kabuli</i>    | <i>Ca_Kabuli_Chr04</i>       | 37365020                       | (C/T)       |
| 6956        | CakSNP6956     | <i>Kabuli</i>    | <i>Ca_Kabuli_Chr04</i>       | 37371262                       | (G/A)       |
| 6957        | CakSNP6957     | <i>Kabuli</i>    | <i>Ca_Kabuli_Chr04</i>       | 37371263                       | (G/A)       |
| 6958        | CakSNP6958     | <i>Kabuli</i>    | <i>Ca_Kabuli_Chr04</i>       | 37433459                       | (G/T)       |
| 6959        | CakSNP6959     | <i>Kabuli</i>    | <i>Ca_Kabuli_Chr04</i>       | 37450206                       | (A/C)       |
| 6960        | CakSNP6960     | <i>Kabuli</i>    | <i>Ca_Kabuli_Chr04</i>       | 37450326                       | (A/T)       |
| 6961        | CakSNP6961     | <i>Kabuli</i>    | <i>Ca_Kabuli_Chr04</i>       | 37450308                       | (C/T)       |
| 6962        | CakSNP6962     | <i>Kabuli</i>    | <i>Ca_Kabuli_Chr04</i>       | 37450294                       | (T/C)       |
| 6963        | CakSNP6963     | <i>Kabuli</i>    | <i>Ca_Kabuli_Chr04</i>       | 37453497                       | (C/G)       |
| 6964        | CakSNP6964     | <i>Kabuli</i>    | <i>Ca_Kabuli_Chr04</i>       | 37453449                       | (A/G)       |
| 6965        | CakSNP6965     | <i>Kabuli</i>    | <i>Ca_Kabuli_Chr04</i>       | 37453590                       | (C/A)       |
| 6966        | CakSNP6966     | <i>Kabuli</i>    | <i>Ca_Kabuli_Chr04</i>       | 37453586                       | (C/A)       |
| 6967        | CakSNP6967     | <i>Kabuli</i>    | <i>Ca_Kabuli_Chr04</i>       | 37454296                       | (A/G)       |
| 6968        | CakSNP6968     | <i>Kabuli</i>    | <i>Ca_Kabuli_Chr04</i>       | 37492422                       | (C/A)       |
| 6969        | CakSNP6969     | <i>Kabuli</i>    | <i>Ca_Kabuli_Chr04</i>       | 37549883                       | (T/C)       |
| 6970        | CakSNP6970     | <i>Kabuli</i>    | <i>Ca_Kabuli_Chr04</i>       | 37549871                       | (A/T)       |
| 6971        | CakSNP6971     | <i>Kabuli</i>    | <i>Ca_Kabuli_Chr04</i>       | 37550122                       | (G/A)       |
| 6972        | CakSNP6972     | <i>Kabuli</i>    | <i>Ca_Kabuli_Chr04</i>       | 37552973                       | (C/T)       |
| 6973        | CakSNP6973     | <i>Kabuli</i>    | <i>Ca_Kabuli_Chr04</i>       | 37558880                       | (C/T)       |
| 6974        | CakSNP6974     | <i>Kabuli</i>    | <i>Ca_Kabuli_Chr04</i>       | 37558881                       | (G/T)       |
| 6975        | CakSNP6975     | <i>Kabuli</i>    | <i>Ca_Kabuli_Chr04</i>       | 37575636                       | (T/C)       |
| 6976        | CakSNP6976     | <i>Kabuli</i>    | <i>Ca_Kabuli_Chr04</i>       | 37575670                       | (C/T)       |
| 6977        | CakSNP6977     | <i>Kabuli</i>    | <i>Ca_Kabuli_Chr04</i>       | 37575709                       | (C/T)       |
| 6978        | CakSNP6978     | <i>Kabuli</i>    | <i>Ca_Kabuli_Chr04</i>       | 37612154                       | (A/G)       |
| 6979        | CakSNP6979     | <i>Kabuli</i>    | <i>Ca_Kabuli_Chr04</i>       | 37630404                       | (A/G)       |

| <b>S.N.</b> | <b>SNP IDs</b> | <b>Cultivars</b> | <b>Chromosomes/scaffolds</b> | <b>Physical positions (bp)</b> | <b>SNPs</b> |
|-------------|----------------|------------------|------------------------------|--------------------------------|-------------|
| 6980        | CakSNP6980     | <i>Kabuli</i>    | <i>Ca_Kabuli_Chr04</i>       | 37630445                       | (A/G)       |
| 6981        | CakSNP6981     | <i>Kabuli</i>    | <i>Ca_Kabuli_Chr04</i>       | 37630527                       | (G/A)       |
| 6982        | CakSNP6982     | <i>Kabuli</i>    | <i>Ca_Kabuli_Chr04</i>       | 37630520                       | (G/C)       |
| 6983        | CakSNP6983     | <i>Kabuli</i>    | <i>Ca_Kabuli_Chr04</i>       | 37634624                       | (C/T)       |
| 6984        | CakSNP6984     | <i>Kabuli</i>    | <i>Ca_Kabuli_Chr04</i>       | 37635300                       | (T/A)       |
| 6985        | CakSNP6985     | <i>Kabuli</i>    | <i>Ca_Kabuli_Chr04</i>       | 37685824                       | (T/C)       |
| 6986        | CakSNP6986     | <i>Kabuli</i>    | <i>Ca_Kabuli_Chr04</i>       | 37685842                       | (T/G)       |
| 6987        | CakSNP6987     | <i>Kabuli</i>    | <i>Ca_Kabuli_Chr04</i>       | 37699176                       | (G/A)       |
| 6988        | CakSNP6988     | <i>Kabuli</i>    | <i>Ca_Kabuli_Chr04</i>       | 37699141                       | (T/G)       |
| 6989        | CakSNP6989     | <i>Kabuli</i>    | <i>Ca_Kabuli_Chr04</i>       | 37699140                       | (C/T)       |
| 6990        | CakSNP6990     | <i>Kabuli</i>    | <i>Ca_Kabuli_Chr04</i>       | 37703656                       | (G/T)       |
| 6991        | CakSNP6991     | <i>Kabuli</i>    | <i>Ca_Kabuli_Chr04</i>       | 37703653                       | (A/C)       |
| 6992        | CakSNP6992     | <i>Kabuli</i>    | <i>Ca_Kabuli_Chr04</i>       | 37703651                       | (T/C)       |
| 6993        | CakSNP6993     | <i>Kabuli</i>    | <i>Ca_Kabuli_Chr04</i>       | 37703649                       | (A/C)       |
| 6994        | CakSNP6994     | <i>Kabuli</i>    | <i>Ca_Kabuli_Chr04</i>       | 37703648                       | (C/T)       |
| 6995        | CakSNP6995     | <i>Kabuli</i>    | <i>Ca_Kabuli_Chr04</i>       | 37707115                       | (G/A)       |
| 6996        | CakSNP6996     | <i>Kabuli</i>    | <i>Ca_Kabuli_Chr04</i>       | 37708260                       | (A/G)       |
| 6997        | CakSNP6997     | <i>Kabuli</i>    | <i>Ca_Kabuli_Chr04</i>       | 37708348                       | (T/G)       |
| 6998        | CakSNP6998     | <i>Kabuli</i>    | <i>Ca_Kabuli_Chr04</i>       | 37708334                       | (T/A)       |
| 6999        | CakSNP6999     | <i>Kabuli</i>    | <i>Ca_Kabuli_Chr04</i>       | 37753479                       | (C/T)       |
| 7000        | CakSNP7000     | <i>Kabuli</i>    | <i>Ca_Kabuli_Chr04</i>       | 37806689                       | (T/C)       |
| 7001        | CakSNP7001     | <i>Kabuli</i>    | <i>Ca_Kabuli_Chr04</i>       | 37812917                       | (G/C)       |
| 7002        | CakSNP7002     | <i>Kabuli</i>    | <i>Ca_Kabuli_Chr04</i>       | 37859069                       | (T/G)       |
| 7003        | CakSNP7003     | <i>Kabuli</i>    | <i>Ca_Kabuli_Chr04</i>       | 37897261                       | (G/T)       |
| 7004        | CakSNP7004     | <i>Kabuli</i>    | <i>Ca_Kabuli_Chr04</i>       | 37897266                       | (A/T)       |
| 7005        | CakSNP7005     | <i>Kabuli</i>    | <i>Ca_Kabuli_Chr04</i>       | 37897351                       | (C/A)       |
| 7006        | CakSNP7006     | <i>Kabuli</i>    | <i>Ca_Kabuli_Chr04</i>       | 37898404                       | (A/G)       |
| 7007        | CakSNP7007     | <i>Kabuli</i>    | <i>Ca_Kabuli_Chr04</i>       | 37899597                       | (C/T)       |
| 7008        | CakSNP7008     | <i>Kabuli</i>    | <i>Ca_Kabuli_Chr04</i>       | 37901584                       | (C/T)       |
| 7009        | CakSNP7009     | <i>Kabuli</i>    | <i>Ca_Kabuli_Chr04</i>       | 37901575                       | (G/A)       |
| 7010        | CakSNP7010     | <i>Kabuli</i>    | <i>Ca_Kabuli_Chr04</i>       | 38008062                       | (T/A)       |
| 7011        | CakSNP7011     | <i>Kabuli</i>    | <i>Ca_Kabuli_Chr04</i>       | 38008082                       | (T/C)       |
| 7012        | CakSNP7012     | <i>Kabuli</i>    | <i>Ca_Kabuli_Chr04</i>       | 38008243                       | (C/T)       |
| 7013        | CakSNP7013     | <i>Kabuli</i>    | <i>Ca_Kabuli_Chr04</i>       | 38008227                       | (G/T)       |
| 7014        | CakSNP7014     | <i>Kabuli</i>    | <i>Ca_Kabuli_Chr04</i>       | 38008213                       | (C/T)       |
| 7015        | CakSNP7015     | <i>Kabuli</i>    | <i>Ca_Kabuli_Chr04</i>       | 38008205                       | (A/G)       |
| 7016        | CakSNP7016     | <i>Kabuli</i>    | <i>Ca_Kabuli_Chr04</i>       | 38008204                       | (G/A)       |
| 7017        | CakSNP7017     | <i>Kabuli</i>    | <i>Ca_Kabuli_Chr04</i>       | 38008186                       | (A/C)       |
| 7018        | CakSNP7018     | <i>Kabuli</i>    | <i>Ca_Kabuli_Chr04</i>       | 38008174                       | (A/G)       |

| <b>S.N.</b> | <b>SNP IDs</b> | <b>Cultivars</b> | <b>Chromosomes/scaffolds</b> | <b>Physical positions (bp)</b> | <b>SNPs</b> |
|-------------|----------------|------------------|------------------------------|--------------------------------|-------------|
| 7019        | CakSNP7019     | Kabuli           | Ca_Kabuli_Chr04              | 38027560                       | (G/A)       |
| 7020        | CakSNP7020     | Kabuli           | Ca_Kabuli_Chr04              | 38029012                       | (T/C)       |
| 7021        | CakSNP7021     | Kabuli           | Ca_Kabuli_Chr04              | 38029050                       | (G/A)       |
| 7022        | CakSNP7022     | Kabuli           | Ca_Kabuli_Chr04              | 38029136                       | (G/T)       |
| 7023        | CakSNP7023     | Kabuli           | Ca_Kabuli_Chr04              | 38038865                       | (C/T)       |
| 7024        | CakSNP7024     | Kabuli           | Ca_Kabuli_Chr04              | 38038959                       | (A/G)       |
| 7025        | CakSNP7025     | Kabuli           | Ca_Kabuli_Chr04              | 38039037                       | (T/C)       |
| 7026        | CakSNP7026     | Kabuli           | Ca_Kabuli_Chr04              | 38039046                       | (C/T)       |
| 7027        | CakSNP7027     | Kabuli           | Ca_Kabuli_Chr04              | 38039076                       | (A/G)       |
| 7028        | CakSNP7028     | Kabuli           | Ca_Kabuli_Chr04              | 38039088                       | (T/C)       |
| 7029        | CakSNP7029     | Kabuli           | Ca_Kabuli_Chr04              | 38039251                       | (G/C)       |
| 7030        | CakSNP7030     | Kabuli           | Ca_Kabuli_Chr04              | 38039289                       | (G/A)       |
| 7031        | CakSNP7031     | Kabuli           | Ca_Kabuli_Chr04              | 38039297                       | (C/T)       |
| 7032        | CakSNP7032     | Kabuli           | Ca_Kabuli_Chr04              | 38039313                       | (G/A)       |
| 7033        | CakSNP7033     | Kabuli           | Ca_Kabuli_Chr04              | 38039371                       | (T/C)       |
| 7034        | CakSNP7034     | Kabuli           | Ca_Kabuli_Chr04              | 38153183                       | (C/A)       |
| 7035        | CakSNP7035     | Kabuli           | Ca_Kabuli_Chr04              | 38153195                       | (T/C)       |
| 7036        | CakSNP7036     | Kabuli           | Ca_Kabuli_Chr04              | 38153216                       | (T/C)       |
| 7037        | CakSNP7037     | Kabuli           | Ca_Kabuli_Chr04              | 38153277                       | (A/G)       |
| 7038        | CakSNP7038     | Kabuli           | Ca_Kabuli_Chr04              | 38153275                       | (C/A)       |
| 7039        | CakSNP7039     | Kabuli           | Ca_Kabuli_Chr04              | 38153269                       | (A/C)       |
| 7040        | CakSNP7040     | Kabuli           | Ca_Kabuli_Chr04              | 38179583                       | (A/C)       |
| 7041        | CakSNP7041     | Kabuli           | Ca_Kabuli_Chr04              | 38179614                       | (G/C)       |
| 7042        | CakSNP7042     | Kabuli           | Ca_Kabuli_Chr04              | 38181292                       | (G/A)       |
| 7043        | CakSNP7043     | Kabuli           | Ca_Kabuli_Chr04              | 38195411                       | (T/A)       |
| 7044        | CakSNP7044     | Kabuli           | Ca_Kabuli_Chr04              | 38195438                       | (C/T)       |
| 7045        | CakSNP7045     | Kabuli           | Ca_Kabuli_Chr04              | 38215267                       | (G/A)       |
| 7046        | CakSNP7046     | Kabuli           | Ca_Kabuli_Chr04              | 38221009                       | (A/G)       |
| 7047        | CakSNP7047     | Kabuli           | Ca_Kabuli_Chr04              | 38288823                       | (G/T)       |
| 7048        | CakSNP7048     | Kabuli           | Ca_Kabuli_Chr04              | 38288877                       | (C/G)       |
| 7049        | CakSNP7049     | Kabuli           | Ca_Kabuli_Chr04              | 38289066                       | (G/A)       |
| 7050        | CakSNP7050     | Kabuli           | Ca_Kabuli_Chr04              | 38289052                       | (G/A)       |
| 7051        | CakSNP7051     | Kabuli           | Ca_Kabuli_Chr04              | 38288997                       | (T/A)       |
| 7052        | CakSNP7052     | Kabuli           | Ca_Kabuli_Chr04              | 38343633                       | (A/T)       |
| 7053        | CakSNP7053     | Kabuli           | Ca_Kabuli_Chr04              | 38343750                       | (C/T)       |
| 7054        | CakSNP7054     | Kabuli           | Ca_Kabuli_Chr04              | 38343687                       | (C/T)       |
| 7055        | CakSNP7055     | Kabuli           | Ca_Kabuli_Chr04              | 38358067                       | (A/G)       |
| 7056        | CakSNP7056     | Kabuli           | Ca_Kabuli_Chr04              | 38358398                       | (A/G)       |
| 7057        | CakSNP7057     | Kabuli           | Ca_Kabuli_Chr04              | 38358677                       | (G/A)       |

| <b>S.N.</b> | <b>SNP IDs</b> | <b>Cultivars</b> | <b>Chromosomes/scaffolds</b> | <b>Physical positions (bp)</b> | <b>SNPs</b> |
|-------------|----------------|------------------|------------------------------|--------------------------------|-------------|
| 7058        | CakSNP7058     | <i>Kabuli</i>    | <i>Ca_Kabuli_Chr04</i>       | 38358887                       | (G/A)       |
| 7059        | CakSNP7059     | <i>Kabuli</i>    | <i>Ca_Kabuli_Chr04</i>       | 38358869                       | (G/A)       |
| 7060        | CakSNP7060     | <i>Kabuli</i>    | <i>Ca_Kabuli_Chr04</i>       | 38362132                       | (T/A)       |
| 7061        | CakSNP7061     | <i>Kabuli</i>    | <i>Ca_Kabuli_Chr04</i>       | 38362139                       | (T/A)       |
| 7062        | CakSNP7062     | <i>Kabuli</i>    | <i>Ca_Kabuli_Chr04</i>       | 38364369                       | (C/T)       |
| 7063        | CakSNP7063     | <i>Kabuli</i>    | <i>Ca_Kabuli_Chr04</i>       | 38370848                       | (A/G)       |
| 7064        | CakSNP7064     | <i>Kabuli</i>    | <i>Ca_Kabuli_Chr04</i>       | 38370864                       | (G/A)       |
| 7065        | CakSNP7065     | <i>Kabuli</i>    | <i>Ca_Kabuli_Chr04</i>       | 38370941                       | (A/G)       |
| 7066        | CakSNP7066     | <i>Kabuli</i>    | <i>Ca_Kabuli_Chr04</i>       | 38370930                       | (C/T)       |
| 7067        | CakSNP7067     | <i>Kabuli</i>    | <i>Ca_Kabuli_Chr04</i>       | 38370926                       | (T/C)       |
| 7068        | CakSNP7068     | <i>Kabuli</i>    | <i>Ca_Kabuli_Chr04</i>       | 38370925                       | (G/A)       |
| 7069        | CakSNP7069     | <i>Kabuli</i>    | <i>Ca_Kabuli_Chr04</i>       | 38370922                       | (G/A)       |
| 7070        | CakSNP7070     | <i>Kabuli</i>    | <i>Ca_Kabuli_Chr04</i>       | 38370921                       | (T/G)       |
| 7071        | CakSNP7071     | <i>Kabuli</i>    | <i>Ca_Kabuli_Chr04</i>       | 38382809                       | (T/C)       |
| 7072        | CakSNP7072     | <i>Kabuli</i>    | <i>Ca_Kabuli_Chr04</i>       | 38382890                       | (C/G)       |
| 7073        | CakSNP7073     | <i>Kabuli</i>    | <i>Ca_Kabuli_Chr04</i>       | 38421798                       | (A/C)       |
| 7074        | CakSNP7074     | <i>Kabuli</i>    | <i>Ca_Kabuli_Chr04</i>       | 38422037                       | (C/T)       |
| 7075        | CakSNP7075     | <i>Kabuli</i>    | <i>Ca_Kabuli_Chr04</i>       | 38421984                       | (C/T)       |
| 7076        | CakSNP7076     | <i>Kabuli</i>    | <i>Ca_Kabuli_Chr04</i>       | 38425675                       | (A/G)       |
| 7077        | CakSNP7077     | <i>Kabuli</i>    | <i>Ca_Kabuli_Chr04</i>       | 38425720                       | (T/A)       |
| 7078        | CakSNP7078     | <i>Kabuli</i>    | <i>Ca_Kabuli_Chr04</i>       | 38473540                       | (A/G)       |
| 7079        | CakSNP7079     | <i>Kabuli</i>    | <i>Ca_Kabuli_Chr04</i>       | 38473653                       | (T/C)       |
| 7080        | CakSNP7080     | <i>Kabuli</i>    | <i>Ca_Kabuli_Chr04</i>       | 38474123                       | (A/T)       |
| 7081        | CakSNP7081     | <i>Kabuli</i>    | <i>Ca_Kabuli_Chr04</i>       | 38474108                       | (T/C)       |
| 7082        | CakSNP7082     | <i>Kabuli</i>    | <i>Ca_Kabuli_Chr04</i>       | 38474192                       | (T/C)       |
| 7083        | CakSNP7083     | <i>Kabuli</i>    | <i>Ca_Kabuli_Chr04</i>       | 38475310                       | (A/C)       |
| 7084        | CakSNP7084     | <i>Kabuli</i>    | <i>Ca_Kabuli_Chr04</i>       | 38475425                       | (A/G)       |
| 7085        | CakSNP7085     | <i>Kabuli</i>    | <i>Ca_Kabuli_Chr04</i>       | 38475449                       | (T/A)       |
| 7086        | CakSNP7086     | <i>Kabuli</i>    | <i>Ca_Kabuli_Chr04</i>       | 38475442                       | (A/G)       |
| 7087        | CakSNP7087     | <i>Kabuli</i>    | <i>Ca_Kabuli_Chr04</i>       | 38475424                       | (C/G)       |
| 7088        | CakSNP7088     | <i>Kabuli</i>    | <i>Ca_Kabuli_Chr04</i>       | 38475547                       | (C/T)       |
| 7089        | CakSNP7089     | <i>Kabuli</i>    | <i>Ca_Kabuli_Chr04</i>       | 38540201                       | (C/T)       |
| 7090        | CakSNP7090     | <i>Kabuli</i>    | <i>Ca_Kabuli_Chr04</i>       | 38540236                       | (C/T)       |
| 7091        | CakSNP7091     | <i>Kabuli</i>    | <i>Ca_Kabuli_Chr04</i>       | 38540247                       | (G/A)       |
| 7092        | CakSNP7092     | <i>Kabuli</i>    | <i>Ca_Kabuli_Chr04</i>       | 38620579                       | (C/T)       |
| 7093        | CakSNP7093     | <i>Kabuli</i>    | <i>Ca_Kabuli_Chr04</i>       | 38620620                       | (A/T)       |
| 7094        | CakSNP7094     | <i>Kabuli</i>    | <i>Ca_Kabuli_Chr04</i>       | 38659377                       | (T/C)       |
| 7095        | CakSNP7095     | <i>Kabuli</i>    | <i>Ca_Kabuli_Chr04</i>       | 38659398                       | (G/A)       |
| 7096        | CakSNP7096     | <i>Kabuli</i>    | <i>Ca_Kabuli_Chr04</i>       | 38659534                       | (T/A)       |

| <b>S.N.</b> | <b>SNP IDs</b> | <b>Cultivars</b> | <b>Chromosomes/scaffolds</b> | <b>Physical positions (bp)</b> | <b>SNPs</b> |
|-------------|----------------|------------------|------------------------------|--------------------------------|-------------|
| 7097        | CakSNP7097     | <i>Kabuli</i>    | <i>Ca_Kabuli_Chr04</i>       | 38679987                       | (A/G)       |
| 7098        | CakSNP7098     | <i>Kabuli</i>    | <i>Ca_Kabuli_Chr04</i>       | 38721154                       | (A/G)       |
| 7099        | CakSNP7099     | <i>Kabuli</i>    | <i>Ca_Kabuli_Chr04</i>       | 38721160                       | (A/G)       |
| 7100        | CakSNP7100     | <i>Kabuli</i>    | <i>Ca_Kabuli_Chr04</i>       | 38721207                       | (A/C)       |
| 7101        | CakSNP7101     | <i>Kabuli</i>    | <i>Ca_Kabuli_Chr04</i>       | 38756507                       | (T/C)       |
| 7102        | CakSNP7102     | <i>Kabuli</i>    | <i>Ca_Kabuli_Chr04</i>       | 38756510                       | (C/G)       |
| 7103        | CakSNP7103     | <i>Kabuli</i>    | <i>Ca_Kabuli_Chr04</i>       | 38759640                       | (A/C)       |
| 7104        | CakSNP7104     | <i>Kabuli</i>    | <i>Ca_Kabuli_Chr04</i>       | 38770348                       | (T/A)       |
| 7105        | CakSNP7105     | <i>Kabuli</i>    | <i>Ca_Kabuli_Chr04</i>       | 38770370                       | (G/C)       |
| 7106        | CakSNP7106     | <i>Kabuli</i>    | <i>Ca_Kabuli_Chr04</i>       | 38770450                       | (C/G)       |
| 7107        | CakSNP7107     | <i>Kabuli</i>    | <i>Ca_Kabuli_Chr04</i>       | 38770510                       | (G/A)       |
| 7108        | CakSNP7108     | <i>Kabuli</i>    | <i>Ca_Kabuli_Chr04</i>       | 38770606                       | (G/A)       |
| 7109        | CakSNP7109     | <i>Kabuli</i>    | <i>Ca_Kabuli_Chr04</i>       | 38770582                       | (G/A)       |
| 7110        | CakSNP7110     | <i>Kabuli</i>    | <i>Ca_Kabuli_Chr04</i>       | 38785535                       | (G/A)       |
| 7111        | CakSNP7111     | <i>Kabuli</i>    | <i>Ca_Kabuli_Chr04</i>       | 38829959                       | (T/G)       |
| 7112        | CakSNP7112     | <i>Kabuli</i>    | <i>Ca_Kabuli_Chr04</i>       | 38833304                       | (C/A)       |
| 7113        | CakSNP7113     | <i>Kabuli</i>    | <i>Ca_Kabuli_Chr04</i>       | 38833280                       | (C/T)       |
| 7114        | CakSNP7114     | <i>Kabuli</i>    | <i>Ca_Kabuli_Chr04</i>       | 38833333                       | (A/C)       |
| 7115        | CakSNP7115     | <i>Kabuli</i>    | <i>Ca_Kabuli_Chr04</i>       | 38833414                       | (A/C)       |
| 7116        | CakSNP7116     | <i>Kabuli</i>    | <i>Ca_Kabuli_Chr04</i>       | 38834383                       | (G/A)       |
| 7117        | CakSNP7117     | <i>Kabuli</i>    | <i>Ca_Kabuli_Chr04</i>       | 38834405                       | (G/A)       |
| 7118        | CakSNP7118     | <i>Kabuli</i>    | <i>Ca_Kabuli_Chr04</i>       | 38834423                       | (G/C)       |
| 7119        | CakSNP7119     | <i>Kabuli</i>    | <i>Ca_Kabuli_Chr04</i>       | 38834431                       | (G/A)       |
| 7120        | CakSNP7120     | <i>Kabuli</i>    | <i>Ca_Kabuli_Chr04</i>       | 38834448                       | (A/T)       |
| 7121        | CakSNP7121     | <i>Kabuli</i>    | <i>Ca_Kabuli_Chr04</i>       | 38834477                       | (A/G)       |
| 7122        | CakSNP7122     | <i>Kabuli</i>    | <i>Ca_Kabuli_Chr04</i>       | 38834474                       | (G/A)       |
| 7123        | CakSNP7123     | <i>Kabuli</i>    | <i>Ca_Kabuli_Chr04</i>       | 38834453                       | (C/T)       |
| 7124        | CakSNP7124     | <i>Kabuli</i>    | <i>Ca_Kabuli_Chr04</i>       | 38888779                       | (C/T)       |
| 7125        | CakSNP7125     | <i>Kabuli</i>    | <i>Ca_Kabuli_Chr04</i>       | 38888791                       | (G/C)       |
| 7126        | CakSNP7126     | <i>Kabuli</i>    | <i>Ca_Kabuli_Chr04</i>       | 38889023                       | (C/T)       |
| 7127        | CakSNP7127     | <i>Kabuli</i>    | <i>Ca_Kabuli_Chr04</i>       | 38918394                       | (A/T)       |
| 7128        | CakSNP7128     | <i>Kabuli</i>    | <i>Ca_Kabuli_Chr04</i>       | 38918424                       | (G/A)       |
| 7129        | CakSNP7129     | <i>Kabuli</i>    | <i>Ca_Kabuli_Chr04</i>       | 38918430                       | (C/A)       |
| 7130        | CakSNP7130     | <i>Kabuli</i>    | <i>Ca_Kabuli_Chr04</i>       | 38918628                       | (C/T)       |
| 7131        | CakSNP7131     | <i>Kabuli</i>    | <i>Ca_Kabuli_Chr04</i>       | 38918547                       | (T/C)       |
| 7132        | CakSNP7132     | <i>Kabuli</i>    | <i>Ca_Kabuli_Chr04</i>       | 38918649                       | (G/C)       |
| 7133        | CakSNP7133     | <i>Kabuli</i>    | <i>Ca_Kabuli_Chr04</i>       | 38929681                       | (A/G)       |
| 7134        | CakSNP7134     | <i>Kabuli</i>    | <i>Ca_Kabuli_Chr04</i>       | 38948414                       | (C/A)       |
| 7135        | CakSNP7135     | <i>Kabuli</i>    | <i>Ca_Kabuli_Chr04</i>       | 38961521                       | (G/A)       |



| <b>S.N.</b> | <b>SNP IDs</b> | <b>Cultivars</b> | <b>Chromosomes/scaffolds</b> | <b>Physical positions (bp)</b> | <b>SNPs</b> |
|-------------|----------------|------------------|------------------------------|--------------------------------|-------------|
| 7136        | CakSNP7136     | <i>Kabuli</i>    | <i>Ca_Kabuli_Chr04</i>       | 38978462                       | (A/G)       |
| 7137        | CakSNP7137     | <i>Kabuli</i>    | <i>Ca_Kabuli_Chr04</i>       | 39031801                       | (C/T)       |
| 7138        | CakSNP7138     | <i>Kabuli</i>    | <i>Ca_Kabuli_Chr04</i>       | 39031823                       | (G/A)       |
| 7139        | CakSNP7139     | <i>Kabuli</i>    | <i>Ca_Kabuli_Chr04</i>       | 39042938                       | (T/G)       |
| 7140        | CakSNP7140     | <i>Kabuli</i>    | <i>Ca_Kabuli_Chr04</i>       | 39042921                       | (T/C)       |
| 7141        | CakSNP7141     | <i>Kabuli</i>    | <i>Ca_Kabuli_Chr04</i>       | 39057991                       | (T/C)       |
| 7142        | CakSNP7142     | <i>Kabuli</i>    | <i>Ca_Kabuli_Chr04</i>       | 39058011                       | (G/C)       |
| 7143        | CakSNP7143     | <i>Kabuli</i>    | <i>Ca_Kabuli_Chr04</i>       | 39081951                       | (A/G)       |
| 7144        | CakSNP7144     | <i>Kabuli</i>    | <i>Ca_Kabuli_Chr04</i>       | 39110408                       | (T/C)       |
| 7145        | CakSNP7145     | <i>Kabuli</i>    | <i>Ca_Kabuli_Chr04</i>       | 39110448                       | (A/G)       |
| 7146        | CakSNP7146     | <i>Kabuli</i>    | <i>Ca_Kabuli_Chr04</i>       | 39110735                       | (A/G)       |
| 7147        | CakSNP7147     | <i>Kabuli</i>    | <i>Ca_Kabuli_Chr04</i>       | 39113309                       | (T/C)       |
| 7148        | CakSNP7148     | <i>Kabuli</i>    | <i>Ca_Kabuli_Chr04</i>       | 39113327                       | (G/A)       |
| 7149        | CakSNP7149     | <i>Kabuli</i>    | <i>Ca_Kabuli_Chr04</i>       | 39113330                       | (G/A)       |
| 7150        | CakSNP7150     | <i>Kabuli</i>    | <i>Ca_Kabuli_Chr04</i>       | 39113401                       | (A/T)       |
| 7151        | CakSNP7151     | <i>Kabuli</i>    | <i>Ca_Kabuli_Chr04</i>       | 39114000                       | (A/C)       |
| 7152        | CakSNP7152     | <i>Kabuli</i>    | <i>Ca_Kabuli_Chr04</i>       | 39136826                       | (C/T)       |
| 7153        | CakSNP7153     | <i>Kabuli</i>    | <i>Ca_Kabuli_Chr04</i>       | 39189012                       | (A/G)       |
| 7154        | CakSNP7154     | <i>Kabuli</i>    | <i>Ca_Kabuli_Chr04</i>       | 39189016                       | (G/A)       |
| 7155        | CakSNP7155     | <i>Kabuli</i>    | <i>Ca_Kabuli_Chr04</i>       | 39268505                       | (T/C)       |
| 7156        | CakSNP7156     | <i>Kabuli</i>    | <i>Ca_Kabuli_Chr04</i>       | 39306900                       | (G/A)       |
| 7157        | CakSNP7157     | <i>Kabuli</i>    | <i>Ca_Kabuli_Chr04</i>       | 39635746                       | (T/A)       |
| 7158        | CakSNP7158     | <i>Kabuli</i>    | <i>Ca_Kabuli_Chr04</i>       | 39635721                       | (A/G)       |
| 7159        | CakSNP7159     | <i>Kabuli</i>    | <i>Ca_Kabuli_Chr04</i>       | 39635720                       | (G/A)       |
| 7160        | CakSNP7160     | <i>Kabuli</i>    | <i>Ca_Kabuli_Chr04</i>       | 39635718                       | (C/T)       |
| 7161        | CakSNP7161     | <i>Kabuli</i>    | <i>Ca_Kabuli_Chr04</i>       | 39650872                       | (T/C)       |
| 7162        | CakSNP7162     | <i>Kabuli</i>    | <i>Ca_Kabuli_Chr04</i>       | 39659757                       | (C/T)       |
| 7163        | CakSNP7163     | <i>Kabuli</i>    | <i>Ca_Kabuli_Chr04</i>       | 39659750                       | (G/A)       |
| 7164        | CakSNP7164     | <i>Kabuli</i>    | <i>Ca_Kabuli_Chr04</i>       | 39659832                       | (C/T)       |
| 7165        | CakSNP7165     | <i>Kabuli</i>    | <i>Ca_Kabuli_Chr04</i>       | 39715087                       | (A/G)       |
| 7166        | CakSNP7166     | <i>Kabuli</i>    | <i>Ca_Kabuli_Chr04</i>       | 39719606                       | (C/G)       |
| 7167        | CakSNP7167     | <i>Kabuli</i>    | <i>Ca_Kabuli_Chr04</i>       | 39719747                       | (G/T)       |
| 7168        | CakSNP7168     | <i>Kabuli</i>    | <i>Ca_Kabuli_Chr04</i>       | 39779796                       | (G/A)       |
| 7169        | CakSNP7169     | <i>Kabuli</i>    | <i>Ca_Kabuli_Chr04</i>       | 39803305                       | (T/C)       |
| 7170        | CakSNP7170     | <i>Kabuli</i>    | <i>Ca_Kabuli_Chr04</i>       | 39849612                       | (G/T)       |
| 7171        | CakSNP7171     | <i>Kabuli</i>    | <i>Ca_Kabuli_Chr04</i>       | 39849657                       | (G/A)       |
| 7172        | CakSNP7172     | <i>Kabuli</i>    | <i>Ca_Kabuli_Chr04</i>       | 39964930                       | (T/C)       |
| 7173        | CakSNP7173     | <i>Kabuli</i>    | <i>Ca_Kabuli_Chr04</i>       | 40010119                       | (A/C)       |
| 7174        | CakSNP7174     | <i>Kabuli</i>    | <i>Ca_Kabuli_Chr04</i>       | 40010201                       | (A/G)       |

| <b>S.N.</b> | <b>SNP IDs</b> | <b>Cultivars</b> | <b>Chromosomes/scaffolds</b> | <b>Physical positions (bp)</b> | <b>SNPs</b> |
|-------------|----------------|------------------|------------------------------|--------------------------------|-------------|
| 7175        | CakSNP7175     | <i>Kabuli</i>    | <i>Ca_Kabuli_Chr04</i>       | 40010177                       | (G/A)       |
| 7176        | CakSNP7176     | <i>Kabuli</i>    | <i>Ca_Kabuli_Chr04</i>       | 40010165                       | (A/C)       |
| 7177        | CakSNP7177     | <i>Kabuli</i>    | <i>Ca_Kabuli_Chr04</i>       | 40059880                       | (C/T)       |
| 7178        | CakSNP7178     | <i>Kabuli</i>    | <i>Ca_Kabuli_Chr04</i>       | 40060022                       | (C/T)       |
| 7179        | CakSNP7179     | <i>Kabuli</i>    | <i>Ca_Kabuli_Chr04</i>       | 40060063                       | (T/G)       |
| 7180        | CakSNP7180     | <i>Kabuli</i>    | <i>Ca_Kabuli_Chr04</i>       | 40061195                       | (T/C)       |
| 7181        | CakSNP7181     | <i>Kabuli</i>    | <i>Ca_Kabuli_Chr04</i>       | 40061262                       | (A/C)       |
| 7182        | CakSNP7182     | <i>Kabuli</i>    | <i>Ca_Kabuli_Chr04</i>       | 40065505                       | (T/A)       |
| 7183        | CakSNP7183     | <i>Kabuli</i>    | <i>Ca_Kabuli_Chr04</i>       | 40134460                       | (A/G)       |
| 7184        | CakSNP7184     | <i>Kabuli</i>    | <i>Ca_Kabuli_Chr04</i>       | 40134518                       | (T/C)       |
| 7185        | CakSNP7185     | <i>Kabuli</i>    | <i>Ca_Kabuli_Chr04</i>       | 40149064                       | (C/T)       |
| 7186        | CakSNP7186     | <i>Kabuli</i>    | <i>Ca_Kabuli_Chr04</i>       | 40149132                       | (G/C)       |
| 7187        | CakSNP7187     | <i>Kabuli</i>    | <i>Ca_Kabuli_Chr04</i>       | 40149324                       | (G/C)       |
| 7188        | CakSNP7188     | <i>Kabuli</i>    | <i>Ca_Kabuli_Chr04</i>       | 40169176                       | (T/G)       |
| 7189        | CakSNP7189     | <i>Kabuli</i>    | <i>Ca_Kabuli_Chr04</i>       | 40185606                       | (A/G)       |
| 7190        | CakSNP7190     | <i>Kabuli</i>    | <i>Ca_Kabuli_Chr04</i>       | 40199692                       | (A/C)       |
| 7191        | CakSNP7191     | <i>Kabuli</i>    | <i>Ca_Kabuli_Chr04</i>       | 40218375                       | (G/T)       |
| 7192        | CakSNP7192     | <i>Kabuli</i>    | <i>Ca_Kabuli_Chr04</i>       | 40218410                       | (G/A)       |
| 7193        | CakSNP7193     | <i>Kabuli</i>    | <i>Ca_Kabuli_Chr04</i>       | 40267713                       | (G/T)       |
| 7194        | CakSNP7194     | <i>Kabuli</i>    | <i>Ca_Kabuli_Chr04</i>       | 40267719                       | (G/A)       |
| 7195        | CakSNP7195     | <i>Kabuli</i>    | <i>Ca_Kabuli_Chr04</i>       | 40279513                       | (G/T)       |
| 7196        | CakSNP7196     | <i>Kabuli</i>    | <i>Ca_Kabuli_Chr04</i>       | 40313721                       | (A/G)       |
| 7197        | CakSNP7197     | <i>Kabuli</i>    | <i>Ca_Kabuli_Chr04</i>       | 40349170                       | (C/T)       |
| 7198        | CakSNP7198     | <i>Kabuli</i>    | <i>Ca_Kabuli_Chr04</i>       | 40368028                       | (C/T)       |
| 7199        | CakSNP7199     | <i>Kabuli</i>    | <i>Ca_Kabuli_Chr04</i>       | 40368278                       | (T/C)       |
| 7200        | CakSNP7200     | <i>Kabuli</i>    | <i>Ca_Kabuli_Chr04</i>       | 40368765                       | (G/A)       |
| 7201        | CakSNP7201     | <i>Kabuli</i>    | <i>Ca_Kabuli_Chr04</i>       | 40375386                       | (C/T)       |
| 7202        | CakSNP7202     | <i>Kabuli</i>    | <i>Ca_Kabuli_Chr04</i>       | 40375361                       | (A/G)       |
| 7203        | CakSNP7203     | <i>Kabuli</i>    | <i>Ca_Kabuli_Chr04</i>       | 40429387                       | (G/A)       |
| 7204        | CakSNP7204     | <i>Kabuli</i>    | <i>Ca_Kabuli_Chr04</i>       | 40471412                       | (G/C)       |
| 7205        | CakSNP7205     | <i>Kabuli</i>    | <i>Ca_Kabuli_Chr04</i>       | 40472097                       | (A/G)       |
| 7206        | CakSNP7206     | <i>Kabuli</i>    | <i>Ca_Kabuli_Chr04</i>       | 40513733                       | (C/T)       |
| 7207        | CakSNP7207     | <i>Kabuli</i>    | <i>Ca_Kabuli_Chr04</i>       | 40583205                       | (G/T)       |
| 7208        | CakSNP7208     | <i>Kabuli</i>    | <i>Ca_Kabuli_Chr04</i>       | 40583206                       | (A/T)       |
| 7209        | CakSNP7209     | <i>Kabuli</i>    | <i>Ca_Kabuli_Chr04</i>       | 40583211                       | (G/T)       |
| 7210        | CakSNP7210     | <i>Kabuli</i>    | <i>Ca_Kabuli_Chr04</i>       | 40583214                       | (G/A)       |
| 7211        | CakSNP7211     | <i>Kabuli</i>    | <i>Ca_Kabuli_Chr04</i>       | 40583216                       | (C/A)       |
| 7212        | CakSNP7212     | <i>Kabuli</i>    | <i>Ca_Kabuli_Chr04</i>       | 40583217                       | (G/A)       |
| 7213        | CakSNP7213     | <i>Kabuli</i>    | <i>Ca_Kabuli_Chr04</i>       | 40583219                       | (G/A)       |

| <b>S.N.</b> | <b>SNP IDs</b> | <b>Cultivars</b> | <b>Chromosomes/scaffolds</b> | <b>Physical positions (bp)</b> | <b>SNPs</b> |
|-------------|----------------|------------------|------------------------------|--------------------------------|-------------|
| 7214        | CakSNP7214     | <i>Kabuli</i>    | <i>Ca_Kabuli_Chr04</i>       | 40597192                       | (G/A)       |
| 7215        | CakSNP7215     | <i>Kabuli</i>    | <i>Ca_Kabuli_Chr04</i>       | 40597534                       | (A/G)       |
| 7216        | CakSNP7216     | <i>Kabuli</i>    | <i>Ca_Kabuli_Chr04</i>       | 40597464                       | (G/A)       |
| 7217        | CakSNP7217     | <i>Kabuli</i>    | <i>Ca_Kabuli_Chr04</i>       | 40723208                       | (C/G)       |
| 7218        | CakSNP7218     | <i>Kabuli</i>    | <i>Ca_Kabuli_Chr04</i>       | 40723212                       | (G/A)       |
| 7219        | CakSNP7219     | <i>Kabuli</i>    | <i>Ca_Kabuli_Chr04</i>       | 40734572                       | (T/G)       |
| 7220        | CakSNP7220     | <i>Kabuli</i>    | <i>Ca_Kabuli_Chr04</i>       | 40734765                       | (G/A)       |
| 7221        | CakSNP7221     | <i>Kabuli</i>    | <i>Ca_Kabuli_Chr04</i>       | 40738927                       | (C/T)       |
| 7222        | CakSNP7222     | <i>Kabuli</i>    | <i>Ca_Kabuli_Chr04</i>       | 40795060                       | (G/A)       |
| 7223        | CakSNP7223     | <i>Kabuli</i>    | <i>Ca_Kabuli_Chr04</i>       | 40795085                       | (C/G)       |
| 7224        | CakSNP7224     | <i>Kabuli</i>    | <i>Ca_Kabuli_Chr04</i>       | 40795137                       | (T/G)       |
| 7225        | CakSNP7225     | <i>Kabuli</i>    | <i>Ca_Kabuli_Chr04</i>       | 40801783                       | (T/C)       |
| 7226        | CakSNP7226     | <i>Kabuli</i>    | <i>Ca_Kabuli_Chr04</i>       | 40801791                       | (C/G)       |
| 7227        | CakSNP7227     | <i>Kabuli</i>    | <i>Ca_Kabuli_Chr04</i>       | 40805740                       | (C/A)       |
| 7228        | CakSNP7228     | <i>Kabuli</i>    | <i>Ca_Kabuli_Chr04</i>       | 40806993                       | (A/G)       |
| 7229        | CakSNP7229     | <i>Kabuli</i>    | <i>Ca_Kabuli_Chr04</i>       | 40839967                       | (G/A)       |
| 7230        | CakSNP7230     | <i>Kabuli</i>    | <i>Ca_Kabuli_Chr04</i>       | 40839949                       | (G/A)       |
| 7231        | CakSNP7231     | <i>Kabuli</i>    | <i>Ca_Kabuli_Chr04</i>       | 40852381                       | (A/C)       |
| 7232        | CakSNP7232     | <i>Kabuli</i>    | <i>Ca_Kabuli_Chr04</i>       | 40852475                       | (T/C)       |
| 7233        | CakSNP7233     | <i>Kabuli</i>    | <i>Ca_Kabuli_Chr04</i>       | 40912677                       | (A/G)       |
| 7234        | CakSNP7234     | <i>Kabuli</i>    | <i>Ca_Kabuli_Chr04</i>       | 40912681                       | (A/G)       |
| 7235        | CakSNP7235     | <i>Kabuli</i>    | <i>Ca_Kabuli_Chr04</i>       | 40912714                       | (C/G)       |
| 7236        | CakSNP7236     | <i>Kabuli</i>    | <i>Ca_Kabuli_Chr04</i>       | 40912731                       | (C/T)       |
| 7237        | CakSNP7237     | <i>Kabuli</i>    | <i>Ca_Kabuli_Chr04</i>       | 40917776                       | (C/A)       |
| 7238        | CakSNP7238     | <i>Kabuli</i>    | <i>Ca_Kabuli_Chr04</i>       | 40917777                       | (T/A)       |
| 7239        | CakSNP7239     | <i>Kabuli</i>    | <i>Ca_Kabuli_Chr04</i>       | 40917807                       | (C/T)       |
| 7240        | CakSNP7240     | <i>Kabuli</i>    | <i>Ca_Kabuli_Chr04</i>       | 40941283                       | (A/G)       |
| 7241        | CakSNP7241     | <i>Kabuli</i>    | <i>Ca_Kabuli_Chr04</i>       | 41032564                       | (A/G)       |
| 7242        | CakSNP7242     | <i>Kabuli</i>    | <i>Ca_Kabuli_Chr04</i>       | 41032590                       | (C/A)       |
| 7243        | CakSNP7243     | <i>Kabuli</i>    | <i>Ca_Kabuli_Chr04</i>       | 41032599                       | (T/C)       |
| 7244        | CakSNP7244     | <i>Kabuli</i>    | <i>Ca_Kabuli_Chr04</i>       | 41032608                       | (T/C)       |
| 7245        | CakSNP7245     | <i>Kabuli</i>    | <i>Ca_Kabuli_Chr04</i>       | 41070048                       | (C/G)       |
| 7246        | CakSNP7246     | <i>Kabuli</i>    | <i>Ca_Kabuli_Chr04</i>       | 41070017                       | (T/A)       |
| 7247        | CakSNP7247     | <i>Kabuli</i>    | <i>Ca_Kabuli_Chr04</i>       | 41094082                       | (T/C)       |
| 7248        | CakSNP7248     | <i>Kabuli</i>    | <i>Ca_Kabuli_Chr04</i>       | 41094554                       | (A/C)       |
| 7249        | CakSNP7249     | <i>Kabuli</i>    | <i>Ca_Kabuli_Chr04</i>       | 41094685                       | (G/C)       |
| 7250        | CakSNP7250     | <i>Kabuli</i>    | <i>Ca_Kabuli_Chr04</i>       | 41117822                       | (C/A)       |
| 7251        | CakSNP7251     | <i>Kabuli</i>    | <i>Ca_Kabuli_Chr04</i>       | 41141086                       | (G/T)       |
| 7252        | CakSNP7252     | <i>Kabuli</i>    | <i>Ca_Kabuli_Chr04</i>       | 41142299                       | (T/C)       |

| <b>S.N.</b> | <b>SNP IDs</b> | <b>Cultivars</b> | <b>Chromosomes/scaffolds</b> | <b>Physical positions (bp)</b> | <b>SNPs</b> |
|-------------|----------------|------------------|------------------------------|--------------------------------|-------------|
| 7253        | CakSNP7253     | Kabuli           | Ca_Kabuli_Chr04              | 41142290                       | (A/G)       |
| 7254        | CakSNP7254     | Kabuli           | Ca_Kabuli_Chr04              | 41142288                       | (T/C)       |
| 7255        | CakSNP7255     | Kabuli           | Ca_Kabuli_Chr04              | 41144277                       | (T/A)       |
| 7256        | CakSNP7256     | Kabuli           | Ca_Kabuli_Chr04              | 41145767                       | (C/T)       |
| 7257        | CakSNP7257     | Kabuli           | Ca_Kabuli_Chr04              | 41145875                       | (G/A)       |
| 7258        | CakSNP7258     | Kabuli           | Ca_Kabuli_Chr04              | 41207328                       | (C/T)       |
| 7259        | CakSNP7259     | Kabuli           | Ca_Kabuli_Chr04              | 41207356                       | (C/T)       |
| 7260        | CakSNP7260     | Kabuli           | Ca_Kabuli_Chr04              | 41207392                       | (T/G)       |
| 7261        | CakSNP7261     | Kabuli           | Ca_Kabuli_Chr04              | 41207354                       | (A/C)       |
| 7262        | CakSNP7262     | Kabuli           | Ca_Kabuli_Chr04              | 41209521                       | (T/G)       |
| 7263        | CakSNP7263     | Kabuli           | Ca_Kabuli_Chr04              | 41209711                       | (C/A)       |
| 7264        | CakSNP7264     | Kabuli           | Ca_Kabuli_Chr04              | 41215850                       | (A/C)       |
| 7265        | CakSNP7265     | Kabuli           | Ca_Kabuli_Chr04              | 41228918                       | (T/C)       |
| 7266        | CakSNP7266     | Kabuli           | Ca_Kabuli_Chr04              | 41229605                       | (C/T)       |
| 7267        | CakSNP7267     | Kabuli           | Ca_Kabuli_Chr04              | 41277786                       | (G/A)       |
| 7268        | CakSNP7268     | Kabuli           | Ca_Kabuli_Chr04              | 41277799                       | (T/G)       |
| 7269        | CakSNP7269     | Kabuli           | Ca_Kabuli_Chr04              | 41292152                       | (T/C)       |
| 7270        | CakSNP7270     | Kabuli           | Ca_Kabuli_Chr04              | 41319598                       | (T/C)       |
| 7271        | CakSNP7271     | Kabuli           | Ca_Kabuli_Chr04              | 41319610                       | (G/A)       |
| 7272        | CakSNP7272     | Kabuli           | Ca_Kabuli_Chr04              | 41344739                       | (A/T)       |
| 7273        | CakSNP7273     | Kabuli           | Ca_Kabuli_Chr04              | 41427081                       | (A/T)       |
| 7274        | CakSNP7274     | Kabuli           | Ca_Kabuli_Chr04              | 41427086                       | (C/A)       |
| 7275        | CakSNP7275     | Kabuli           | Ca_Kabuli_Chr04              | 41427093                       | (T/G)       |
| 7276        | CakSNP7276     | Kabuli           | Ca_Kabuli_Chr04              | 41445171                       | (T/C)       |
| 7277        | CakSNP7277     | Kabuli           | Ca_Kabuli_Chr04              | 41445212                       | (A/G)       |
| 7278        | CakSNP7278     | Kabuli           | Ca_Kabuli_Chr04              | 41445225                       | (A/T)       |
| 7279        | CakSNP7279     | Kabuli           | Ca_Kabuli_Chr04              | 41445242                       | (C/T)       |
| 7280        | CakSNP7280     | Kabuli           | Ca_Kabuli_Chr04              | 41458426                       | (A/G)       |
| 7281        | CakSNP7281     | Kabuli           | Ca_Kabuli_Chr04              | 41500284                       | (A/C)       |
| 7282        | CakSNP7282     | Kabuli           | Ca_Kabuli_Chr04              | 41500286                       | (A/G)       |
| 7283        | CakSNP7283     | Kabuli           | Ca_Kabuli_Chr04              | 41512840                       | (G/A)       |
| 7284        | CakSNP7284     | Kabuli           | Ca_Kabuli_Chr04              | 41568682                       | (A/C)       |
| 7285        | CakSNP7285     | Kabuli           | Ca_Kabuli_Chr04              | 41629852                       | (T/A)       |
| 7286        | CakSNP7286     | Kabuli           | Ca_Kabuli_Chr04              | 41648927                       | (C/T)       |
| 7287        | CakSNP7287     | Kabuli           | Ca_Kabuli_Chr04              | 41648998                       | (A/G)       |
| 7288        | CakSNP7288     | Kabuli           | Ca_Kabuli_Chr04              | 41675299                       | (A/T)       |
| 7289        | CakSNP7289     | Kabuli           | Ca_Kabuli_Chr04              | 41698291                       | (A/G)       |
| 7290        | CakSNP7290     | Kabuli           | Ca_Kabuli_Chr04              | 41698386                       | (A/G)       |
| 7291        | CakSNP7291     | Kabuli           | Ca_Kabuli_Chr04              | 41700712                       | (C/A)       |

| <b>S.N.</b> | <b>SNP IDs</b> | <b>Cultivars</b> | <b>Chromosomes/scaffolds</b> | <b>Physical positions (bp)</b> | <b>SNPs</b> |
|-------------|----------------|------------------|------------------------------|--------------------------------|-------------|
| 7292        | CakSNP7292     | Kabuli           | Ca_Kabuli_Chr04              | 41721289                       | (G/A)       |
| 7293        | CakSNP7293     | Kabuli           | Ca_Kabuli_Chr04              | 41772690                       | (C/T)       |
| 7294        | CakSNP7294     | Kabuli           | Ca_Kabuli_Chr04              | 41772823                       | (G/A)       |
| 7295        | CakSNP7295     | Kabuli           | Ca_Kabuli_Chr04              | 41772796                       | (T/A)       |
| 7296        | CakSNP7296     | Kabuli           | Ca_Kabuli_Chr04              | 41772794                       | (T/C)       |
| 7297        | CakSNP7297     | Kabuli           | Ca_Kabuli_Chr04              | 41864826                       | (G/A)       |
| 7298        | CakSNP7298     | Kabuli           | Ca_Kabuli_Chr04              | 41864846                       | (C/G)       |
| 7299        | CakSNP7299     | Kabuli           | Ca_Kabuli_Chr04              | 41938784                       | (A/G)       |
| 7300        | CakSNP7300     | Kabuli           | Ca_Kabuli_Chr04              | 41938812                       | (T/G)       |
| 7301        | CakSNP7301     | Kabuli           | Ca_Kabuli_Chr04              | 41956050                       | (C/G)       |
| 7302        | CakSNP7302     | Kabuli           | Ca_Kabuli_Chr04              | 41956085                       | (T/C)       |
| 7303        | CakSNP7303     | Kabuli           | Ca_Kabuli_Chr04              | 41987193                       | (A/G)       |
| 7304        | CakSNP7304     | Kabuli           | Ca_Kabuli_Chr04              | 42056479                       | (G/A)       |
| 7305        | CakSNP7305     | Kabuli           | Ca_Kabuli_Chr04              | 42092379                       | (T/G)       |
| 7306        | CakSNP7306     | Kabuli           | Ca_Kabuli_Chr04              | 42092381                       | (A/G)       |
| 7307        | CakSNP7307     | Kabuli           | Ca_Kabuli_Chr04              | 42092385                       | (G/A)       |
| 7308        | CakSNP7308     | Kabuli           | Ca_Kabuli_Chr04              | 42105737                       | (C/T)       |
| 7309        | CakSNP7309     | Kabuli           | Ca_Kabuli_Chr04              | 42105701                       | (A/T)       |
| 7310        | CakSNP7310     | Kabuli           | Ca_Kabuli_Chr04              | 42108980                       | (C/A)       |
| 7311        | CakSNP7311     | Kabuli           | Ca_Kabuli_Chr04              | 42246499                       | (C/T)       |
| 7312        | CakSNP7312     | Kabuli           | Ca_Kabuli_Chr04              | 42246527                       | (C/A)       |
| 7313        | CakSNP7313     | Kabuli           | Ca_Kabuli_Chr04              | 42246565                       | (T/G)       |
| 7314        | CakSNP7314     | Kabuli           | Ca_Kabuli_Chr04              | 42246566                       | (T/G)       |
| 7315        | CakSNP7315     | Kabuli           | Ca_Kabuli_Chr04              | 42246572                       | (T/G)       |
| 7316        | CakSNP7316     | Kabuli           | Ca_Kabuli_Chr04              | 42246653                       | (C/G)       |
| 7317        | CakSNP7317     | Kabuli           | Ca_Kabuli_Chr04              | 42273252                       | (G/A)       |
| 7318        | CakSNP7318     | Kabuli           | Ca_Kabuli_Chr04              | 42353949                       | (C/T)       |
| 7319        | CakSNP7319     | Kabuli           | Ca_Kabuli_Chr04              | 42499699                       | (A/T)       |
| 7320        | CakSNP7320     | Kabuli           | Ca_Kabuli_Chr04              | 42603642                       | (T/C)       |
| 7321        | CakSNP7321     | Kabuli           | Ca_Kabuli_Chr04              | 42768142                       | (T/G)       |
| 7322        | CakSNP7322     | Kabuli           | Ca_Kabuli_Chr04              | 42807483                       | (G/A)       |
| 7323        | CakSNP7323     | Kabuli           | Ca_Kabuli_Chr04              | 42807518                       | (A/G)       |
| 7324        | CakSNP7324     | Kabuli           | Ca_Kabuli_Chr04              | 42807509                       | (C/T)       |
| 7325        | CakSNP7325     | Kabuli           | Ca_Kabuli_Chr04              | 43319846                       | (A/G)       |
| 7326        | CakSNP7326     | Kabuli           | Ca_Kabuli_Chr04              | 43324547                       | (G/C)       |
| 7327        | CakSNP7327     | Kabuli           | Ca_Kabuli_Chr04              | 43431770                       | (C/T)       |
| 7328        | CakSNP7328     | Kabuli           | Ca_Kabuli_Chr04              | 43431772                       | (T/A)       |
| 7329        | CakSNP7329     | Kabuli           | Ca_Kabuli_Chr04              | 43431815                       | (G/T)       |
| 7330        | CakSNP7330     | Kabuli           | Ca_Kabuli_Chr04              | 43446753                       | (T/A)       |

| <b>S.N.</b> | <b>SNP IDs</b> | <b>Cultivars</b> | <b>Chromosomes/scaffolds</b> | <b>Physical positions (bp)</b> | <b>SNPs</b> |
|-------------|----------------|------------------|------------------------------|--------------------------------|-------------|
| 7331        | CakSNP7331     | <i>Kabuli</i>    | <i>Ca_Kabuli_Chr04</i>       | 43447262                       | (A/T)       |
| 7332        | CakSNP7332     | <i>Kabuli</i>    | <i>Ca_Kabuli_Chr04</i>       | 43476193                       | (T/C)       |
| 7333        | CakSNP7333     | <i>Kabuli</i>    | <i>Ca_Kabuli_Chr04</i>       | 43653225                       | (A/G)       |
| 7334        | CakSNP7334     | <i>Kabuli</i>    | <i>Ca_Kabuli_Chr04</i>       | 43653226                       | (C/T)       |
| 7335        | CakSNP7335     | <i>Kabuli</i>    | <i>Ca_Kabuli_Chr04</i>       | 43662224                       | (A/C)       |
| 7336        | CakSNP7336     | <i>Kabuli</i>    | <i>Ca_Kabuli_Chr04</i>       | 43677006                       | (T/G)       |
| 7337        | CakSNP7337     | <i>Kabuli</i>    | <i>Ca_Kabuli_Chr04</i>       | 43677222                       | (C/T)       |
| 7338        | CakSNP7338     | <i>Kabuli</i>    | <i>Ca_Kabuli_Chr04</i>       | 43722728                       | (T/C)       |
| 7339        | CakSNP7339     | <i>Kabuli</i>    | <i>Ca_Kabuli_Chr04</i>       | 43722727                       | (A/G)       |
| 7340        | CakSNP7340     | <i>Kabuli</i>    | <i>Ca_Kabuli_Chr04</i>       | 43722704                       | (C/G)       |
| 7341        | CakSNP7341     | <i>Kabuli</i>    | <i>Ca_Kabuli_Chr04</i>       | 43723219                       | (T/G)       |
| 7342        | CakSNP7342     | <i>Kabuli</i>    | <i>Ca_Kabuli_Chr04</i>       | 43723224                       | (C/A)       |
| 7343        | CakSNP7343     | <i>Kabuli</i>    | <i>Ca_Kabuli_Chr04</i>       | 43723248                       | (T/C)       |
| 7344        | CakSNP7344     | <i>Kabuli</i>    | <i>Ca_Kabuli_Chr04</i>       | 43726406                       | (C/T)       |
| 7345        | CakSNP7345     | <i>Kabuli</i>    | <i>Ca_Kabuli_Chr04</i>       | 43729063                       | (G/T)       |
| 7346        | CakSNP7346     | <i>Kabuli</i>    | <i>Ca_Kabuli_Chr04</i>       | 43729261                       | (C/G)       |
| 7347        | CakSNP7347     | <i>Kabuli</i>    | <i>Ca_Kabuli_Chr04</i>       | 43729266                       | (A/G)       |
| 7348        | CakSNP7348     | <i>Kabuli</i>    | <i>Ca_Kabuli_Chr04</i>       | 43807399                       | (C/T)       |
| 7349        | CakSNP7349     | <i>Kabuli</i>    | <i>Ca_Kabuli_Chr04</i>       | 43807460                       | (C/T)       |
| 7350        | CakSNP7350     | <i>Kabuli</i>    | <i>Ca_Kabuli_Chr04</i>       | 43840666                       | (C/G)       |
| 7351        | CakSNP7351     | <i>Kabuli</i>    | <i>Ca_Kabuli_Chr04</i>       | 43840650                       | (C/T)       |
| 7352        | CakSNP7352     | <i>Kabuli</i>    | <i>Ca_Kabuli_Chr04</i>       | 43979065                       | (A/G)       |
| 7353        | CakSNP7353     | <i>Kabuli</i>    | <i>Ca_Kabuli_Chr04</i>       | 44008835                       | (T/C)       |
| 7354        | CakSNP7354     | <i>Kabuli</i>    | <i>Ca_Kabuli_Chr04</i>       | 44059060                       | (C/T)       |
| 7355        | CakSNP7355     | <i>Kabuli</i>    | <i>Ca_Kabuli_Chr04</i>       | 44059061                       | (G/A)       |
| 7356        | CakSNP7356     | <i>Kabuli</i>    | <i>Ca_Kabuli_Chr04</i>       | 44067780                       | (G/A)       |
| 7357        | CakSNP7357     | <i>Kabuli</i>    | <i>Ca_Kabuli_Chr04</i>       | 44090929                       | (T/G)       |
| 7358        | CakSNP7358     | <i>Kabuli</i>    | <i>Ca_Kabuli_Chr04</i>       | 44186434                       | (C/G)       |
| 7359        | CakSNP7359     | <i>Kabuli</i>    | <i>Ca_Kabuli_Chr04</i>       | 44239783                       | (A/C)       |
| 7360        | CakSNP7360     | <i>Kabuli</i>    | <i>Ca_Kabuli_Chr04</i>       | 44239883                       | (A/T)       |
| 7361        | CakSNP7361     | <i>Kabuli</i>    | <i>Ca_Kabuli_Chr04</i>       | 44250159                       | (C/T)       |
| 7362        | CakSNP7362     | <i>Kabuli</i>    | <i>Ca_Kabuli_Chr04</i>       | 44261184                       | (A/C)       |
| 7363        | CakSNP7363     | <i>Kabuli</i>    | <i>Ca_Kabuli_Chr04</i>       | 44261909                       | (T/A)       |
| 7364        | CakSNP7364     | <i>Kabuli</i>    | <i>Ca_Kabuli_Chr04</i>       | 44266692                       | (T/A)       |
| 7365        | CakSNP7365     | <i>Kabuli</i>    | <i>Ca_Kabuli_Chr04</i>       | 44266695                       | (G/A)       |
| 7366        | CakSNP7366     | <i>Kabuli</i>    | <i>Ca_Kabuli_Chr04</i>       | 44266758                       | (C/T)       |
| 7367        | CakSNP7367     | <i>Kabuli</i>    | <i>Ca_Kabuli_Chr04</i>       | 44266819                       | (G/A)       |
| 7368        | CakSNP7368     | <i>Kabuli</i>    | <i>Ca_Kabuli_Chr04</i>       | 44353354                       | (C/T)       |
| 7369        | CakSNP7369     | <i>Kabuli</i>    | <i>Ca_Kabuli_Chr04</i>       | 44353343                       | (G/A)       |

| <b>S.N.</b> | <b>SNP IDs</b> | <b>Cultivars</b> | <b>Chromosomes/scaffolds</b> | <b>Physical positions (bp)</b> | <b>SNPs</b> |
|-------------|----------------|------------------|------------------------------|--------------------------------|-------------|
| 7370        | CakSNP7370     | Kabuli           | Ca_Kabuli_Chr04              | 44375761                       | (T/C)       |
| 7371        | CakSNP7371     | Kabuli           | Ca_Kabuli_Chr04              | 44375831                       | (T/C)       |
| 7372        | CakSNP7372     | Kabuli           | Ca_Kabuli_Chr04              | 44382515                       | (A/G)       |
| 7373        | CakSNP7373     | Kabuli           | Ca_Kabuli_Chr04              | 44382677                       | (C/T)       |
| 7374        | CakSNP7374     | Kabuli           | Ca_Kabuli_Chr04              | 44382671                       | (C/G)       |
| 7375        | CakSNP7375     | Kabuli           | Ca_Kabuli_Chr04              | 44382614                       | (C/A)       |
| 7376        | CakSNP7376     | Kabuli           | Ca_Kabuli_Chr04              | 44382602                       | (A/G)       |
| 7377        | CakSNP7377     | Kabuli           | Ca_Kabuli_Chr04              | 44386579                       | (A/G)       |
| 7378        | CakSNP7378     | Kabuli           | Ca_Kabuli_Chr04              | 44431319                       | (A/C)       |
| 7379        | CakSNP7379     | Kabuli           | Ca_Kabuli_Chr04              | 44431353                       | (G/A)       |
| 7380        | CakSNP7380     | Kabuli           | Ca_Kabuli_Chr04              | 44439372                       | (C/T)       |
| 7381        | CakSNP7381     | Kabuli           | Ca_Kabuli_Chr04              | 44439503                       | (C/A)       |
| 7382        | CakSNP7382     | Kabuli           | Ca_Kabuli_Chr04              | 44439495                       | (G/A)       |
| 7383        | CakSNP7383     | Kabuli           | Ca_Kabuli_Chr04              | 44439493                       | (A/G)       |
| 7384        | CakSNP7384     | Kabuli           | Ca_Kabuli_Chr04              | 44439492                       | (G/T)       |
| 7385        | CakSNP7385     | Kabuli           | Ca_Kabuli_Chr04              | 44439448                       | (T/C)       |
| 7386        | CakSNP7386     | Kabuli           | Ca_Kabuli_Chr04              | 44446468                       | (G/A)       |
| 7387        | CakSNP7387     | Kabuli           | Ca_Kabuli_Chr04              | 44446575                       | (G/A)       |
| 7388        | CakSNP7388     | Kabuli           | Ca_Kabuli_Chr04              | 44446506                       | (C/T)       |
| 7389        | CakSNP7389     | Kabuli           | Ca_Kabuli_Chr04              | 44446503                       | (T/G)       |
| 7390        | CakSNP7390     | Kabuli           | Ca_Kabuli_Chr04              | 44446497                       | (C/T)       |
| 7391        | CakSNP7391     | Kabuli           | Ca_Kabuli_Chr04              | 44472282                       | (G/A)       |
| 7392        | CakSNP7392     | Kabuli           | Ca_Kabuli_Chr04              | 44472278                       | (A/G)       |
| 7393        | CakSNP7393     | Kabuli           | Ca_Kabuli_Chr04              | 44472237                       | (T/A)       |
| 7394        | CakSNP7394     | Kabuli           | Ca_Kabuli_Chr04              | 44590652                       | (T/C)       |
| 7395        | CakSNP7395     | Kabuli           | Ca_Kabuli_Chr04              | 44590678                       | (G/A)       |
| 7396        | CakSNP7396     | Kabuli           | Ca_Kabuli_Chr04              | 44590697                       | (A/C)       |
| 7397        | CakSNP7397     | Kabuli           | Ca_Kabuli_Chr04              | 44591405                       | (G/T)       |
| 7398        | CakSNP7398     | Kabuli           | Ca_Kabuli_Chr04              | 44754355                       | (C/T)       |
| 7399        | CakSNP7399     | Kabuli           | Ca_Kabuli_Chr04              | 44802374                       | (G/A)       |
| 7400        | CakSNP7400     | Kabuli           | Ca_Kabuli_Chr04              | 44802364                       | (A/C)       |
| 7401        | CakSNP7401     | Kabuli           | Ca_Kabuli_Chr04              | 44803694                       | (T/A)       |
| 7402        | CakSNP7402     | Kabuli           | Ca_Kabuli_Chr04              | 44811519                       | (G/A)       |
| 7403        | CakSNP7403     | Kabuli           | Ca_Kabuli_Chr04              | 44814857                       | (A/G)       |
| 7404        | CakSNP7404     | Kabuli           | Ca_Kabuli_Chr04              | 44814981                       | (T/C)       |
| 7405        | CakSNP7405     | Kabuli           | Ca_Kabuli_Chr04              | 44814982                       | (A/G)       |
| 7406        | CakSNP7406     | Kabuli           | Ca_Kabuli_Chr04              | 44824103                       | (G/T)       |
| 7407        | CakSNP7407     | Kabuli           | Ca_Kabuli_Chr04              | 44824105                       | (T/G)       |
| 7408        | CakSNP7408     | Kabuli           | Ca_Kabuli_Chr04              | 44824178                       | (C/G)       |

| <b>S.N.</b> | <b>SNP IDs</b> | <b>Cultivars</b> | <b>Chromosomes/scaffolds</b> | <b>Physical positions (bp)</b> | <b>SNPs</b> |
|-------------|----------------|------------------|------------------------------|--------------------------------|-------------|
| 7409        | CakSNP7409     | <i>Kabuli</i>    | <i>Ca_Kabuli_Chr04</i>       | 44824258                       | (A/G)       |
| 7410        | CakSNP7410     | <i>Kabuli</i>    | <i>Ca_Kabuli_Chr04</i>       | 44832121                       | (G/C)       |
| 7411        | CakSNP7411     | <i>Kabuli</i>    | <i>Ca_Kabuli_Chr04</i>       | 44832144                       | (T/C)       |
| 7412        | CakSNP7412     | <i>Kabuli</i>    | <i>Ca_Kabuli_Chr04</i>       | 44906128                       | (C/A)       |
| 7413        | CakSNP7413     | <i>Kabuli</i>    | <i>Ca_Kabuli_Chr04</i>       | 44906255                       | (A/G)       |
| 7414        | CakSNP7414     | <i>Kabuli</i>    | <i>Ca_Kabuli_Chr04</i>       | 44979108                       | (G/A)       |
| 7415        | CakSNP7415     | <i>Kabuli</i>    | <i>Ca_Kabuli_Chr04</i>       | 45019764                       | (T/C)       |
| 7416        | CakSNP7416     | <i>Kabuli</i>    | <i>Ca_Kabuli_Chr04</i>       | 45019778                       | (T/C)       |
| 7417        | CakSNP7417     | <i>Kabuli</i>    | <i>Ca_Kabuli_Chr04</i>       | 45019787                       | (G/C)       |
| 7418        | CakSNP7418     | <i>Kabuli</i>    | <i>Ca_Kabuli_Chr04</i>       | 45019805                       | (C/A)       |
| 7419        | CakSNP7419     | <i>Kabuli</i>    | <i>Ca_Kabuli_Chr04</i>       | 45019807                       | (C/T)       |
| 7420        | CakSNP7420     | <i>Kabuli</i>    | <i>Ca_Kabuli_Chr04</i>       | 45019814                       | (C/A)       |
| 7421        | CakSNP7421     | <i>Kabuli</i>    | <i>Ca_Kabuli_Chr04</i>       | 45019820                       | (C/T)       |
| 7422        | CakSNP7422     | <i>Kabuli</i>    | <i>Ca_Kabuli_Chr04</i>       | 45019824                       | (A/C)       |
| 7423        | CakSNP7423     | <i>Kabuli</i>    | <i>Ca_Kabuli_Chr04</i>       | 45019867                       | (C/G)       |
| 7424        | CakSNP7424     | <i>Kabuli</i>    | <i>Ca_Kabuli_Chr04</i>       | 45019858                       | (G/T)       |
| 7425        | CakSNP7425     | <i>Kabuli</i>    | <i>Ca_Kabuli_Chr04</i>       | 45019848                       | (C/T)       |
| 7426        | CakSNP7426     | <i>Kabuli</i>    | <i>Ca_Kabuli_Chr04</i>       | 45035589                       | (G/T)       |
| 7427        | CakSNP7427     | <i>Kabuli</i>    | <i>Ca_Kabuli_Chr04</i>       | 45035629                       | (A/C)       |
| 7428        | CakSNP7428     | <i>Kabuli</i>    | <i>Ca_Kabuli_Chr04</i>       | 45035745                       | (A/G)       |
| 7429        | CakSNP7429     | <i>Kabuli</i>    | <i>Ca_Kabuli_Chr04</i>       | 45067534                       | (C/T)       |
| 7430        | CakSNP7430     | <i>Kabuli</i>    | <i>Ca_Kabuli_Chr04</i>       | 45104767                       | (G/A)       |
| 7431        | CakSNP7431     | <i>Kabuli</i>    | <i>Ca_Kabuli_Chr04</i>       | 45104779                       | (C/A)       |
| 7432        | CakSNP7432     | <i>Kabuli</i>    | <i>Ca_Kabuli_Chr04</i>       | 45104805                       | (A/G)       |
| 7433        | CakSNP7433     | <i>Kabuli</i>    | <i>Ca_Kabuli_Chr04</i>       | 45141976                       | (C/A)       |
| 7434        | CakSNP7434     | <i>Kabuli</i>    | <i>Ca_Kabuli_Chr04</i>       | 45141990                       | (A/G)       |
| 7435        | CakSNP7435     | <i>Kabuli</i>    | <i>Ca_Kabuli_Chr04</i>       | 45142020                       | (T/C)       |
| 7436        | CakSNP7436     | <i>Kabuli</i>    | <i>Ca_Kabuli_Chr04</i>       | 45142009                       | (C/T)       |
| 7437        | CakSNP7437     | <i>Kabuli</i>    | <i>Ca_Kabuli_Chr04</i>       | 45142003                       | (A/G)       |
| 7438        | CakSNP7438     | <i>Kabuli</i>    | <i>Ca_Kabuli_Chr04</i>       | 45142077                       | (C/A)       |
| 7439        | CakSNP7439     | <i>Kabuli</i>    | <i>Ca_Kabuli_Chr04</i>       | 45142087                       | (T/A)       |
| 7440        | CakSNP7440     | <i>Kabuli</i>    | <i>Ca_Kabuli_Chr04</i>       | 45142104                       | (T/C)       |
| 7441        | CakSNP7441     | <i>Kabuli</i>    | <i>Ca_Kabuli_Chr04</i>       | 45165191                       | (T/C)       |
| 7442        | CakSNP7442     | <i>Kabuli</i>    | <i>Ca_Kabuli_Chr04</i>       | 45165246                       | (C/G)       |
| 7443        | CakSNP7443     | <i>Kabuli</i>    | <i>Ca_Kabuli_Chr04</i>       | 45165240                       | (T/C)       |
| 7444        | CakSNP7444     | <i>Kabuli</i>    | <i>Ca_Kabuli_Chr04</i>       | 45165231                       | (A/C)       |
| 7445        | CakSNP7445     | <i>Kabuli</i>    | <i>Ca_Kabuli_Chr04</i>       | 45206203                       | (G/T)       |
| 7446        | CakSNP7446     | <i>Kabuli</i>    | <i>Ca_Kabuli_Chr04</i>       | 45206209                       | (G/C)       |
| 7447        | CakSNP7447     | <i>Kabuli</i>    | <i>Ca_Kabuli_Chr04</i>       | 45220084                       | (G/T)       |



| <b>S.N.</b> | <b>SNP IDs</b> | <b>Cultivars</b> | <b>Chromosomes/scaffolds</b> | <b>Physical positions (bp)</b> | <b>SNPs</b> |
|-------------|----------------|------------------|------------------------------|--------------------------------|-------------|
| 7448        | CakSNP7448     | <i>Kabuli</i>    | <i>Ca_Kabuli_Chr04</i>       | 45220642                       | (C/T)       |
| 7449        | CakSNP7449     | <i>Kabuli</i>    | <i>Ca_Kabuli_Chr04</i>       | 45220916                       | (T/C)       |
| 7450        | CakSNP7450     | <i>Kabuli</i>    | <i>Ca_Kabuli_Chr04</i>       | 45225063                       | (T/C)       |
| 7451        | CakSNP7451     | <i>Kabuli</i>    | <i>Ca_Kabuli_Chr04</i>       | 45225059                       | (G/A)       |
| 7452        | CakSNP7452     | <i>Kabuli</i>    | <i>Ca_Kabuli_Chr04</i>       | 45224997                       | (G/C)       |
| 7453        | CakSNP7453     | <i>Kabuli</i>    | <i>Ca_Kabuli_Chr04</i>       | 45225077                       | (A/T)       |
| 7454        | CakSNP7454     | <i>Kabuli</i>    | <i>Ca_Kabuli_Chr04</i>       | 45225093                       | (G/A)       |
| 7455        | CakSNP7455     | <i>Kabuli</i>    | <i>Ca_Kabuli_Chr04</i>       | 45225145                       | (T/A)       |
| 7456        | CakSNP7456     | <i>Kabuli</i>    | <i>Ca_Kabuli_Chr04</i>       | 45225154                       | (T/A)       |
| 7457        | CakSNP7457     | <i>Kabuli</i>    | <i>Ca_Kabuli_Chr04</i>       | 45225155                       | (C/A)       |
| 7458        | CakSNP7458     | <i>Kabuli</i>    | <i>Ca_Kabuli_Chr04</i>       | 45225210                       | (G/T)       |
| 7459        | CakSNP7459     | <i>Kabuli</i>    | <i>Ca_Kabuli_Chr04</i>       | 45225193                       | (A/G)       |
| 7460        | CakSNP7460     | <i>Kabuli</i>    | <i>Ca_Kabuli_Chr04</i>       | 45225165                       | (T/C)       |
| 7461        | CakSNP7461     | <i>Kabuli</i>    | <i>Ca_Kabuli_Chr04</i>       | 45231839                       | (T/C)       |
| 7462        | CakSNP7462     | <i>Kabuli</i>    | <i>Ca_Kabuli_Chr04</i>       | 45231867                       | (A/T)       |
| 7463        | CakSNP7463     | <i>Kabuli</i>    | <i>Ca_Kabuli_Chr04</i>       | 45231868                       | (C/A)       |
| 7464        | CakSNP7464     | <i>Kabuli</i>    | <i>Ca_Kabuli_Chr04</i>       | 45231893                       | (G/T)       |
| 7465        | CakSNP7465     | <i>Kabuli</i>    | <i>Ca_Kabuli_Chr04</i>       | 45292852                       | (G/T)       |
| 7466        | CakSNP7466     | <i>Kabuli</i>    | <i>Ca_Kabuli_Chr04</i>       | 45292918                       | (T/G)       |
| 7467        | CakSNP7467     | <i>Kabuli</i>    | <i>Ca_Kabuli_Chr04</i>       | 45292981                       | (G/T)       |
| 7468        | CakSNP7468     | <i>Kabuli</i>    | <i>Ca_Kabuli_Chr04</i>       | 45292969                       | (T/A)       |
| 7469        | CakSNP7469     | <i>Kabuli</i>    | <i>Ca_Kabuli_Chr04</i>       | 45292960                       | (A/T)       |
| 7470        | CakSNP7470     | <i>Kabuli</i>    | <i>Ca_Kabuli_Chr04</i>       | 45552675                       | (C/A)       |
| 7471        | CakSNP7471     | <i>Kabuli</i>    | <i>Ca_Kabuli_Chr04</i>       | 45595233                       | (G/A)       |
| 7472        | CakSNP7472     | <i>Kabuli</i>    | <i>Ca_Kabuli_Chr04</i>       | 45612178                       | (T/G)       |
| 7473        | CakSNP7473     | <i>Kabuli</i>    | <i>Ca_Kabuli_Chr04</i>       | 45615465                       | (C/T)       |
| 7474        | CakSNP7474     | <i>Kabuli</i>    | <i>Ca_Kabuli_Chr04</i>       | 45615457                       | (C/T)       |
| 7475        | CakSNP7475     | <i>Kabuli</i>    | <i>Ca_Kabuli_Chr04</i>       | 45615452                       | (A/C)       |
| 7476        | CakSNP7476     | <i>Kabuli</i>    | <i>Ca_Kabuli_Chr04</i>       | 45615401                       | (T/G)       |
| 7477        | CakSNP7477     | <i>Kabuli</i>    | <i>Ca_Kabuli_Chr04</i>       | 45646003                       | (A/G)       |
| 7478        | CakSNP7478     | <i>Kabuli</i>    | <i>Ca_Kabuli_Chr04</i>       | 45645996                       | (A/G)       |
| 7479        | CakSNP7479     | <i>Kabuli</i>    | <i>Ca_Kabuli_Chr04</i>       | 45645957                       | (A/C)       |
| 7480        | CakSNP7480     | <i>Kabuli</i>    | <i>Ca_Kabuli_Chr04</i>       | 45708895                       | (C/A)       |
| 7481        | CakSNP7481     | <i>Kabuli</i>    | <i>Ca_Kabuli_Chr04</i>       | 45735754                       | (G/C)       |
| 7482        | CakSNP7482     | <i>Kabuli</i>    | <i>Ca_Kabuli_Chr04</i>       | 45735819                       | (T/C)       |
| 7483        | CakSNP7483     | <i>Kabuli</i>    | <i>Ca_Kabuli_Chr04</i>       | 45751623                       | (G/A)       |
| 7484        | CakSNP7484     | <i>Kabuli</i>    | <i>Ca_Kabuli_Chr04</i>       | 45751618                       | (C/T)       |
| 7485        | CakSNP7485     | <i>Kabuli</i>    | <i>Ca_Kabuli_Chr04</i>       | 45752844                       | (G/A)       |
| 7486        | CakSNP7486     | <i>Kabuli</i>    | <i>Ca_Kabuli_Chr04</i>       | 45752869                       | (G/T)       |

| <b>S.N.</b> | <b>SNP IDs</b> | <b>Cultivars</b> | <b>Chromosomes/scaffolds</b> | <b>Physical positions (bp)</b> | <b>SNPs</b> |
|-------------|----------------|------------------|------------------------------|--------------------------------|-------------|
| 7487        | CakSNP7487     | <i>Kabuli</i>    | <i>Ca_Kabuli_Chr04</i>       | 45752874                       | (A/T)       |
| 7488        | CakSNP7488     | <i>Kabuli</i>    | <i>Ca_Kabuli_Chr04</i>       | 45782453                       | (A/T)       |
| 7489        | CakSNP7489     | <i>Kabuli</i>    | <i>Ca_Kabuli_Chr04</i>       | 45870087                       | (T/C)       |
| 7490        | CakSNP7490     | <i>Kabuli</i>    | <i>Ca_Kabuli_Chr04</i>       | 45870042                       | (C/T)       |
| 7491        | CakSNP7491     | <i>Kabuli</i>    | <i>Ca_Kabuli_Chr04</i>       | 45918351                       | (A/C)       |
| 7492        | CakSNP7492     | <i>Kabuli</i>    | <i>Ca_Kabuli_Chr04</i>       | 45935594                       | (A/C)       |
| 7493        | CakSNP7493     | <i>Kabuli</i>    | <i>Ca_Kabuli_Chr04</i>       | 45942252                       | (G/A)       |
| 7494        | CakSNP7494     | <i>Kabuli</i>    | <i>Ca_Kabuli_Chr04</i>       | 45942341                       | (T/C)       |
| 7495        | CakSNP7495     | <i>Kabuli</i>    | <i>Ca_Kabuli_Chr04</i>       | 45942729                       | (G/A)       |
| 7496        | CakSNP7496     | <i>Kabuli</i>    | <i>Ca_Kabuli_Chr04</i>       | 46134302                       | (C/G)       |
| 7497        | CakSNP7497     | <i>Kabuli</i>    | <i>Ca_Kabuli_Chr04</i>       | 46140729                       | (A/T)       |
| 7498        | CakSNP7498     | <i>Kabuli</i>    | <i>Ca_Kabuli_Chr04</i>       | 46148985                       | (A/T)       |
| 7499        | CakSNP7499     | <i>Kabuli</i>    | <i>Ca_Kabuli_Chr04</i>       | 46149013                       | (A/G)       |
| 7500        | CakSNP7500     | <i>Kabuli</i>    | <i>Ca_Kabuli_Chr04</i>       | 46150670                       | (T/C)       |
| 7501        | CakSNP7501     | <i>Kabuli</i>    | <i>Ca_Kabuli_Chr04</i>       | 46202862                       | (A/G)       |
| 7502        | CakSNP7502     | <i>Kabuli</i>    | <i>Ca_Kabuli_Chr04</i>       | 46344790                       | (G/A)       |
| 7503        | CakSNP7503     | <i>Kabuli</i>    | <i>Ca_Kabuli_Chr04</i>       | 46344826                       | (A/G)       |
| 7504        | CakSNP7504     | <i>Kabuli</i>    | <i>Ca_Kabuli_Chr04</i>       | 46345042                       | (A/G)       |
| 7505        | CakSNP7505     | <i>Kabuli</i>    | <i>Ca_Kabuli_Chr04</i>       | 46402035                       | (G/A)       |
| 7506        | CakSNP7506     | <i>Kabuli</i>    | <i>Ca_Kabuli_Chr04</i>       | 46430326                       | (C/T)       |
| 7507        | CakSNP7507     | <i>Kabuli</i>    | <i>Ca_Kabuli_Chr04</i>       | 46430311                       | (C/A)       |
| 7508        | CakSNP7508     | <i>Kabuli</i>    | <i>Ca_Kabuli_Chr04</i>       | 46430288                       | (G/C)       |
| 7509        | CakSNP7509     | <i>Kabuli</i>    | <i>Ca_Kabuli_Chr04</i>       | 46605167                       | (A/G)       |
| 7510        | CakSNP7510     | <i>Kabuli</i>    | <i>Ca_Kabuli_Chr04</i>       | 46605131                       | (T/A)       |
| 7511        | CakSNP7511     | <i>Kabuli</i>    | <i>Ca_Kabuli_Chr04</i>       | 46612175                       | (G/A)       |
| 7512        | CakSNP7512     | <i>Kabuli</i>    | <i>Ca_Kabuli_Chr04</i>       | 46612197                       | (G/A)       |
| 7513        | CakSNP7513     | <i>Kabuli</i>    | <i>Ca_Kabuli_Chr04</i>       | 46612244                       | (C/T)       |
| 7514        | CakSNP7514     | <i>Kabuli</i>    | <i>Ca_Kabuli_Chr04</i>       | 46613068                       | (T/G)       |
| 7515        | CakSNP7515     | <i>Kabuli</i>    | <i>Ca_Kabuli_Chr04</i>       | 46694919                       | (T/A)       |
| 7516        | CakSNP7516     | <i>Kabuli</i>    | <i>Ca_Kabuli_Chr04</i>       | 46695043                       | (A/C)       |
| 7517        | CakSNP7517     | <i>Kabuli</i>    | <i>Ca_Kabuli_Chr04</i>       | 46695008                       | (T/C)       |
| 7518        | CakSNP7518     | <i>Kabuli</i>    | <i>Ca_Kabuli_Chr04</i>       | 46705181                       | (G/T)       |
| 7519        | CakSNP7519     | <i>Kabuli</i>    | <i>Ca_Kabuli_Chr04</i>       | 46705178                       | (A/T)       |
| 7520        | CakSNP7520     | <i>Kabuli</i>    | <i>Ca_Kabuli_Chr04</i>       | 46705225                       | (A/C)       |
| 7521        | CakSNP7521     | <i>Kabuli</i>    | <i>Ca_Kabuli_Chr04</i>       | 46713972                       | (C/T)       |
| 7522        | CakSNP7522     | <i>Kabuli</i>    | <i>Ca_Kabuli_Chr04</i>       | 46715350                       | (T/C)       |
| 7523        | CakSNP7523     | <i>Kabuli</i>    | <i>Ca_Kabuli_Chr04</i>       | 46715518                       | (G/C)       |
| 7524        | CakSNP7524     | <i>Kabuli</i>    | <i>Ca_Kabuli_Chr04</i>       | 46717155                       | (T/C)       |
| 7525        | CakSNP7525     | <i>Kabuli</i>    | <i>Ca_Kabuli_Chr04</i>       | 46717153                       | (C/T)       |

| <b>S.N.</b> | <b>SNP IDs</b> | <b>Cultivars</b> | <b>Chromosomes/scaffolds</b> | <b>Physical positions (bp)</b> | <b>SNPs</b> |
|-------------|----------------|------------------|------------------------------|--------------------------------|-------------|
| 7526        | CakSNP7526     | Kabuli           | Ca_Kabuli_Chr04              | 46717200                       | (C/T)       |
| 7527        | CakSNP7527     | Kabuli           | Ca_Kabuli_Chr04              | 46717508                       | (G/A)       |
| 7528        | CakSNP7528     | Kabuli           | Ca_Kabuli_Chr04              | 46763540                       | (C/T)       |
| 7529        | CakSNP7529     | Kabuli           | Ca_Kabuli_Chr04              | 46763555                       | (C/T)       |
| 7530        | CakSNP7530     | Kabuli           | Ca_Kabuli_Chr04              | 46763868                       | (T/C)       |
| 7531        | CakSNP7531     | Kabuli           | Ca_Kabuli_Chr04              | 46763841                       | (A/C)       |
| 7532        | CakSNP7532     | Kabuli           | Ca_Kabuli_Chr04              | 47223016                       | (T/C)       |
| 7533        | CakSNP7533     | Kabuli           | Ca_Kabuli_Chr04              | 47223047                       | (A/G)       |
| 7534        | CakSNP7534     | Kabuli           | Ca_Kabuli_Chr04              | 47223635                       | (G/A)       |
| 7535        | CakSNP7535     | Kabuli           | Ca_Kabuli_Chr04              | 47223668                       | (T/G)       |
| 7536        | CakSNP7536     | Kabuli           | Ca_Kabuli_Chr04              | 47296400                       | (C/T)       |
| 7537        | CakSNP7537     | Kabuli           | Ca_Kabuli_Chr04              | 47379992                       | (C/T)       |
| 7538        | CakSNP7538     | Kabuli           | Ca_Kabuli_Chr04              | 47405685                       | (T/A)       |
| 7539        | CakSNP7539     | Kabuli           | Ca_Kabuli_Chr04              | 47419514                       | (A/G)       |
| 7540        | CakSNP7540     | Kabuli           | Ca_Kabuli_Chr04              | 47419517                       | (C/T)       |
| 7541        | CakSNP7541     | Kabuli           | Ca_Kabuli_Chr04              | 47428580                       | (C/T)       |
| 7542        | CakSNP7542     | Kabuli           | Ca_Kabuli_Chr04              | 47428599                       | (C/T)       |
| 7543        | CakSNP7543     | Kabuli           | Ca_Kabuli_Chr04              | 47428631                       | (A/G)       |
| 7544        | CakSNP7544     | Kabuli           | Ca_Kabuli_Chr04              | 47428733                       | (A/G)       |
| 7545        | CakSNP7545     | Kabuli           | Ca_Kabuli_Chr04              | 47440207                       | (G/A)       |
| 7546        | CakSNP7546     | Kabuli           | Ca_Kabuli_Chr04              | 47450409                       | (C/T)       |
| 7547        | CakSNP7547     | Kabuli           | Ca_Kabuli_Chr04              | 47450479                       | (C/G)       |
| 7548        | CakSNP7548     | Kabuli           | Ca_Kabuli_Chr04              | 47562991                       | (A/T)       |
| 7549        | CakSNP7549     | Kabuli           | Ca_Kabuli_Chr04              | 47572228                       | (G/A)       |
| 7550        | CakSNP7550     | Kabuli           | Ca_Kabuli_Chr04              | 47572276                       | (C/T)       |
| 7551        | CakSNP7551     | Kabuli           | Ca_Kabuli_Chr04              | 47578508                       | (C/T)       |
| 7552        | CakSNP7552     | Kabuli           | Ca_Kabuli_Chr04              | 47578556                       | (T/G)       |
| 7553        | CakSNP7553     | Kabuli           | Ca_Kabuli_Chr04              | 47578655                       | (C/T)       |
| 7554        | CakSNP7554     | Kabuli           | Ca_Kabuli_Chr04              | 47578596                       | (C/T)       |
| 7555        | CakSNP7555     | Kabuli           | Ca_Kabuli_Chr04              | 47588760                       | (G/A)       |
| 7556        | CakSNP7556     | Kabuli           | Ca_Kabuli_Chr04              | 47612395                       | (C/A)       |
| 7557        | CakSNP7557     | Kabuli           | Ca_Kabuli_Chr04              | 47612396                       | (G/T)       |
| 7558        | CakSNP7558     | Kabuli           | Ca_Kabuli_Chr04              | 47615800                       | (G/C)       |
| 7559        | CakSNP7559     | Kabuli           | Ca_Kabuli_Chr04              | 47616120                       | (C/T)       |
| 7560        | CakSNP7560     | Kabuli           | Ca_Kabuli_Chr04              | 47616216                       | (A/G)       |
| 7561        | CakSNP7561     | Kabuli           | Ca_Kabuli_Chr04              | 47622112                       | (G/T)       |
| 7562        | CakSNP7562     | Kabuli           | Ca_Kabuli_Chr04              | 47675446                       | (A/G)       |
| 7563        | CakSNP7563     | Kabuli           | Ca_Kabuli_Chr04              | 47675758                       | (A/T)       |
| 7564        | CakSNP7564     | Kabuli           | Ca_Kabuli_Chr04              | 47675860                       | (G/A)       |

| <b>S.N.</b> | <b>SNP IDs</b> | <b>Cultivars</b> | <b>Chromosomes/scaffolds</b> | <b>Physical positions (bp)</b> | <b>SNPs</b> |
|-------------|----------------|------------------|------------------------------|--------------------------------|-------------|
| 7565        | CakSNP7565     | Kabuli           | Ca_Kabuli_Chr04              | 47697239                       | (C/T)       |
| 7566        | CakSNP7566     | Kabuli           | Ca_Kabuli_Chr04              | 47798580                       | (A/G)       |
| 7567        | CakSNP7567     | Kabuli           | Ca_Kabuli_Chr04              | 47798622                       | (G/A)       |
| 7568        | CakSNP7568     | Kabuli           | Ca_Kabuli_Chr04              | 47819943                       | (T/C)       |
| 7569        | CakSNP7569     | Kabuli           | Ca_Kabuli_Chr04              | 48008987                       | (T/C)       |
| 7570        | CakSNP7570     | Kabuli           | Ca_Kabuli_Chr04              | 48009201                       | (C/T)       |
| 7571        | CakSNP7571     | Kabuli           | Ca_Kabuli_Chr04              | 48011446                       | (A/G)       |
| 7572        | CakSNP7572     | Kabuli           | Ca_Kabuli_Chr04              | 48098570                       | (G/A)       |
| 7573        | CakSNP7573     | Kabuli           | Ca_Kabuli_Chr04              | 48098562                       | (G/A)       |
| 7574        | CakSNP7574     | Kabuli           | Ca_Kabuli_Chr04              | 48103202                       | (G/T)       |
| 7575        | CakSNP7575     | Kabuli           | Ca_Kabuli_Chr04              | 48103196                       | (G/A)       |
| 7576        | CakSNP7576     | Kabuli           | Ca_Kabuli_Chr04              | 48103159                       | (G/A)       |
| 7577        | CakSNP7577     | Kabuli           | Ca_Kabuli_Chr04              | 48103153                       | (A/C)       |
| 7578        | CakSNP7578     | Kabuli           | Ca_Kabuli_Chr04              | 48150277                       | (C/T)       |
| 7579        | CakSNP7579     | Kabuli           | Ca_Kabuli_Chr04              | 48150481                       | (T/C)       |
| 7580        | CakSNP7580     | Kabuli           | Ca_Kabuli_Chr04              | 48150480                       | (C/A)       |
| 7581        | CakSNP7581     | Kabuli           | Ca_Kabuli_Chr04              | 48150553                       | (A/G)       |
| 7582        | CakSNP7582     | Kabuli           | Ca_Kabuli_Chr04              | 48150641                       | (G/T)       |
| 7583        | CakSNP7583     | Kabuli           | Ca_Kabuli_Chr04              | 48238919                       | (C/T)       |
| 7584        | CakSNP7584     | Kabuli           | Ca_Kabuli_Chr04              | 48239048                       | (A/G)       |
| 7585        | CakSNP7585     | Kabuli           | Ca_Kabuli_Chr04              | 48263603                       | (G/A)       |
| 7586        | CakSNP7586     | Kabuli           | Ca_Kabuli_Chr04              | 48269138                       | (G/C)       |
| 7587        | CakSNP7587     | Kabuli           | Ca_Kabuli_Chr04              | 48275016                       | (C/T)       |
| 7588        | CakSNP7588     | Kabuli           | Ca_Kabuli_Chr04              | 48322502                       | (C/T)       |
| 7589        | CakSNP7589     | Kabuli           | Ca_Kabuli_Chr04              | 48322507                       | (C/T)       |
| 7590        | CakSNP7590     | Kabuli           | Ca_Kabuli_Chr04              | 48322633                       | (T/C)       |
| 7591        | CakSNP7591     | Kabuli           | Ca_Kabuli_Chr04              | 48331069                       | (C/A)       |
| 7592        | CakSNP7592     | Kabuli           | Ca_Kabuli_Chr04              | 48345604                       | (A/G)       |
| 7593        | CakSNP7593     | Kabuli           | Ca_Kabuli_Chr04              | 48345608                       | (G/T)       |
| 7594        | CakSNP7594     | Kabuli           | Ca_Kabuli_Chr04              | 48345655                       | (A/C)       |
| 7595        | CakSNP7595     | Kabuli           | Ca_Kabuli_Chr04              | 48345697                       | (C/G)       |
| 7596        | CakSNP7596     | Kabuli           | Ca_Kabuli_Chr04              | 48355358                       | (A/T)       |
| 7597        | CakSNP7597     | Kabuli           | Ca_Kabuli_Chr04              | 48355468                       | (G/T)       |
| 7598        | CakSNP7598     | Kabuli           | Ca_Kabuli_Chr04              | 48364170                       | (G/A)       |
| 7599        | CakSNP7599     | Kabuli           | Ca_Kabuli_Chr04              | 48365208                       | (C/A)       |
| 7600        | CakSNP7600     | Kabuli           | Ca_Kabuli_Chr04              | 48365388                       | (G/A)       |
| 7601        | CakSNP7601     | Kabuli           | Ca_Kabuli_Chr04              | 48382666                       | (G/C)       |
| 7602        | CakSNP7602     | Kabuli           | Ca_Kabuli_Chr04              | 48464493                       | (T/C)       |
| 7603        | CakSNP7603     | Kabuli           | Ca_Kabuli_Chr04              | 48464434                       | (G/C)       |

| <b>S.N.</b> | <b>SNP IDs</b> | <b>Cultivars</b> | <b>Chromosomes/scaffolds</b> | <b>Physical positions (bp)</b> | <b>SNPs</b> |
|-------------|----------------|------------------|------------------------------|--------------------------------|-------------|
| 7604        | CakSNP7604     | Kabuli           | Ca_Kabuli_Chr04              | 48470477                       | (A/G)       |
| 7605        | CakSNP7605     | Kabuli           | Ca_Kabuli_Chr04              | 48475447                       | (T/C)       |
| 7606        | CakSNP7606     | Kabuli           | Ca_Kabuli_Chr04              | 48475461                       | (G/A)       |
| 7607        | CakSNP7607     | Kabuli           | Ca_Kabuli_Chr04              | 48478018                       | (A/G)       |
| 7608        | CakSNP7608     | Kabuli           | Ca_Kabuli_Chr04              | 48478058                       | (T/C)       |
| 7609        | CakSNP7609     | Kabuli           | Ca_Kabuli_Chr04              | 48478303                       | (G/A)       |
| 7610        | CakSNP7610     | Kabuli           | Ca_Kabuli_Chr04              | 48478524                       | (C/T)       |
| 7611        | CakSNP7611     | Kabuli           | Ca_Kabuli_Chr04              | 48484453                       | (A/T)       |
| 7612        | CakSNP7612     | Kabuli           | Ca_Kabuli_Chr04              | 48497731                       | (A/C)       |
| 7613        | CakSNP7613     | Kabuli           | Ca_Kabuli_Chr04              | 48497725                       | (A/C)       |
| 7614        | CakSNP7614     | Kabuli           | Ca_Kabuli_Chr04              | 48497756                       | (A/G)       |
| 7615        | CakSNP7615     | Kabuli           | Ca_Kabuli_Chr04              | 48497765                       | (G/A)       |
| 7616        | CakSNP7616     | Kabuli           | Ca_Kabuli_Chr04              | 48497839                       | (G/A)       |
| 7617        | CakSNP7617     | Kabuli           | Ca_Kabuli_Chr04              | 48498133                       | (C/T)       |
| 7618        | CakSNP7618     | Kabuli           | Ca_Kabuli_Chr04              | 48498181                       | (G/C)       |
| 7619        | CakSNP7619     | Kabuli           | Ca_Kabuli_Chr04              | 48498166                       | (A/G)       |
| 7620        | CakSNP7620     | Kabuli           | Ca_Kabuli_Chr04              | 48498368                       | (C/T)       |
| 7621        | CakSNP7621     | Kabuli           | Ca_Kabuli_Chr04              | 48498334                       | (T/G)       |
| 7622        | CakSNP7622     | Kabuli           | Ca_Kabuli_Chr04              | 48498331                       | (T/A)       |
| 7623        | CakSNP7623     | Kabuli           | Ca_Kabuli_Chr04              | 48498312                       | (T/C)       |
| 7624        | CakSNP7624     | Kabuli           | Ca_Kabuli_Chr04              | 48501567                       | (G/T)       |
| 7625        | CakSNP7625     | Kabuli           | Ca_Kabuli_Chr04              | 48501618                       | (C/A)       |
| 7626        | CakSNP7626     | Kabuli           | Ca_Kabuli_Chr04              | 48501662                       | (A/T)       |
| 7627        | CakSNP7627     | Kabuli           | Ca_Kabuli_Chr04              | 48502554                       | (G/T)       |
| 7628        | CakSNP7628     | Kabuli           | Ca_Kabuli_Chr04              | 48502718                       | (G/C)       |
| 7629        | CakSNP7629     | Kabuli           | Ca_Kabuli_Chr04              | 48502714                       | (T/C)       |
| 7630        | CakSNP7630     | Kabuli           | Ca_Kabuli_Chr04              | 48502687                       | (G/A)       |
| 7631        | CakSNP7631     | Kabuli           | Ca_Kabuli_Chr04              | 48591482                       | (T/G)       |
| 7632        | CakSNP7632     | Kabuli           | Ca_Kabuli_Chr04              | 48591539                       | (T/C)       |
| 7633        | CakSNP7633     | Kabuli           | Ca_Kabuli_Chr04              | 48591578                       | (T/C)       |
| 7634        | CakSNP7634     | Kabuli           | Ca_Kabuli_Chr04              | 48591625                       | (G/T)       |
| 7635        | CakSNP7635     | Kabuli           | Ca_Kabuli_Chr04              | 48678278                       | (T/C)       |
| 7636        | CakSNP7636     | Kabuli           | Ca_Kabuli_Chr04              | 48678692                       | (T/C)       |
| 7637        | CakSNP7637     | Kabuli           | Ca_Kabuli_Chr04              | 48688766                       | (A/G)       |
| 7638        | CakSNP7638     | Kabuli           | Ca_Kabuli_Chr04              | 48705815                       | (C/T)       |
| 7639        | CakSNP7639     | Kabuli           | Ca_Kabuli_Chr04              | 48705856                       | (A/T)       |
| 7640        | CakSNP7640     | Kabuli           | Ca_Kabuli_Chr04              | 48705957                       | (C/T)       |
| 7641        | CakSNP7641     | Kabuli           | Ca_Kabuli_Chr04              | 48714912                       | (G/A)       |
| 7642        | CakSNP7642     | Kabuli           | Ca_Kabuli_Chr04              | 48715028                       | (A/G)       |

| <b>S.N.</b> | <b>SNP IDs</b> | <b>Cultivars</b> | <b>Chromosomes/scaffolds</b> | <b>Physical positions (bp)</b> | <b>SNPs</b> |
|-------------|----------------|------------------|------------------------------|--------------------------------|-------------|
| 7643        | CakSNP7643     | <i>Kabuli</i>    | <i>Ca_Kabuli_Chr04</i>       | 48720330                       | (C/T)       |
| 7644        | CakSNP7644     | <i>Kabuli</i>    | <i>Ca_Kabuli_Chr04</i>       | 48720266                       | (C/T)       |
| 7645        | CakSNP7645     | <i>Kabuli</i>    | <i>Ca_Kabuli_Chr04</i>       | 48784151                       | (T/G)       |
| 7646        | CakSNP7646     | <i>Kabuli</i>    | <i>Ca_Kabuli_Chr04</i>       | 48784176                       | (T/C)       |
| 7647        | CakSNP7647     | <i>Kabuli</i>    | <i>Ca_Kabuli_Chr04</i>       | 48784178                       | (C/G)       |
| 7648        | CakSNP7648     | <i>Kabuli</i>    | <i>Ca_Kabuli_Chr04</i>       | 48784179                       | (G/A)       |
| 7649        | CakSNP7649     | <i>Kabuli</i>    | <i>Ca_Kabuli_Chr04</i>       | 48784189                       | (A/T)       |
| 7650        | CakSNP7650     | <i>Kabuli</i>    | <i>Ca_Kabuli_Chr04</i>       | 48784202                       | (A/C)       |
| 7651        | CakSNP7651     | <i>Kabuli</i>    | <i>Ca_Kabuli_Chr04</i>       | 48784204                       | (G/C)       |
| 7652        | CakSNP7652     | <i>Kabuli</i>    | <i>Ca_Kabuli_Chr04</i>       | 48931112                       | (T/G)       |
| 7653        | CakSNP7653     | <i>Kabuli</i>    | <i>Ca_Kabuli_Chr04</i>       | 48931109                       | (A/G)       |
| 7654        | CakSNP7654     | <i>Kabuli</i>    | <i>Ca_Kabuli_Chr04</i>       | 48936643                       | (G/A)       |
| 7655        | CakSNP7655     | <i>Kabuli</i>    | <i>Ca_Kabuli_Chr04</i>       | 48936669                       | (G/A)       |
| 7656        | CakSNP7656     | <i>Kabuli</i>    | <i>Ca_Kabuli_Chr04</i>       | 48936710                       | (A/G)       |
| 7657        | CakSNP7657     | <i>Kabuli</i>    | <i>Ca_Kabuli_Chr04</i>       | 48936819                       | (C/T)       |
| 7658        | CakSNP7658     | <i>Kabuli</i>    | <i>Ca_Kabuli_Chr04</i>       | 48964200                       | (T/C)       |
| 7659        | CakSNP7659     | <i>Kabuli</i>    | <i>Ca_Kabuli_Chr04</i>       | 48964260                       | (G/C)       |
| 7660        | CakSNP7660     | <i>Kabuli</i>    | <i>Ca_Kabuli_Chr04</i>       | 48964248                       | (C/T)       |
| 7661        | CakSNP7661     | <i>Kabuli</i>    | <i>Ca_Kabuli_Chr04</i>       | 49012733                       | (T/A)       |
| 7662        | CakSNP7662     | <i>Kabuli</i>    | <i>Ca_Kabuli_Chr04</i>       | 49012756                       | (C/T)       |
| 7663        | CakSNP7663     | <i>Kabuli</i>    | <i>Ca_Kabuli_Chr05</i>       | 95087                          | (G/A)       |
| 7664        | CakSNP7664     | <i>Kabuli</i>    | <i>Ca_Kabuli_Chr05</i>       | 95253                          | (A/G)       |
| 7665        | CakSNP7665     | <i>Kabuli</i>    | <i>Ca_Kabuli_Chr05</i>       | 131558                         | (A/C)       |
| 7666        | CakSNP7666     | <i>Kabuli</i>    | <i>Ca_Kabuli_Chr05</i>       | 154084                         | (T/G)       |
| 7667        | CakSNP7667     | <i>Kabuli</i>    | <i>Ca_Kabuli_Chr05</i>       | 154095                         | (C/G)       |
| 7668        | CakSNP7668     | <i>Kabuli</i>    | <i>Ca_Kabuli_Chr05</i>       | 154097                         | (A/T)       |
| 7669        | CakSNP7669     | <i>Kabuli</i>    | <i>Ca_Kabuli_Chr05</i>       | 154162                         | (C/T)       |
| 7670        | CakSNP7670     | <i>Kabuli</i>    | <i>Ca_Kabuli_Chr05</i>       | 154128                         | (G/T)       |
| 7671        | CakSNP7671     | <i>Kabuli</i>    | <i>Ca_Kabuli_Chr05</i>       | 166222                         | (T/G)       |
| 7672        | CakSNP7672     | <i>Kabuli</i>    | <i>Ca_Kabuli_Chr05</i>       | 166217                         | (G/C)       |
| 7673        | CakSNP7673     | <i>Kabuli</i>    | <i>Ca_Kabuli_Chr05</i>       | 166216                         | (T/G)       |
| 7674        | CakSNP7674     | <i>Kabuli</i>    | <i>Ca_Kabuli_Chr05</i>       | 166341                         | (C/A)       |
| 7675        | CakSNP7675     | <i>Kabuli</i>    | <i>Ca_Kabuli_Chr05</i>       | 166381                         | (A/G)       |
| 7676        | CakSNP7676     | <i>Kabuli</i>    | <i>Ca_Kabuli_Chr05</i>       | 210625                         | (T/C)       |
| 7677        | CakSNP7677     | <i>Kabuli</i>    | <i>Ca_Kabuli_Chr05</i>       | 210649                         | (C/A)       |
| 7678        | CakSNP7678     | <i>Kabuli</i>    | <i>Ca_Kabuli_Chr05</i>       | 222651                         | (A/C)       |
| 7679        | CakSNP7679     | <i>Kabuli</i>    | <i>Ca_Kabuli_Chr05</i>       | 222630                         | (A/G)       |
| 7680        | CakSNP7680     | <i>Kabuli</i>    | <i>Ca_Kabuli_Chr05</i>       | 222641                         | (C/T)       |
| 7681        | CakSNP7681     | <i>Kabuli</i>    | <i>Ca_Kabuli_Chr05</i>       | 222653                         | (A/C)       |

| <b>S.N.</b> | <b>SNP IDs</b> | <b>Cultivars</b> | <b>Chromosomes/scaffolds</b> | <b>Physical positions (bp)</b> | <b>SNPs</b> |
|-------------|----------------|------------------|------------------------------|--------------------------------|-------------|
| 7682        | CakSNP7682     | <i>Kabuli</i>    | <i>Ca_Kabuli_Chr05</i>       | 222657                         | (G/A)       |
| 7683        | CakSNP7683     | <i>Kabuli</i>    | <i>Ca_Kabuli_Chr05</i>       | 223384                         | (C/G)       |
| 7684        | CakSNP7684     | <i>Kabuli</i>    | <i>Ca_Kabuli_Chr05</i>       | 234247                         | (T/C)       |
| 7685        | CakSNP7685     | <i>Kabuli</i>    | <i>Ca_Kabuli_Chr05</i>       | 234319                         | (T/A)       |
| 7686        | CakSNP7686     | <i>Kabuli</i>    | <i>Ca_Kabuli_Chr05</i>       | 234311                         | (T/A)       |
| 7687        | CakSNP7687     | <i>Kabuli</i>    | <i>Ca_Kabuli_Chr05</i>       | 234310                         | (G/A)       |
| 7688        | CakSNP7688     | <i>Kabuli</i>    | <i>Ca_Kabuli_Chr05</i>       | 234305                         | (T/A)       |
| 7689        | CakSNP7689     | <i>Kabuli</i>    | <i>Ca_Kabuli_Chr05</i>       | 234303                         | (C/A)       |
| 7690        | CakSNP7690     | <i>Kabuli</i>    | <i>Ca_Kabuli_Chr05</i>       | 234410                         | (A/C)       |
| 7691        | CakSNP7691     | <i>Kabuli</i>    | <i>Ca_Kabuli_Chr05</i>       | 245850                         | (T/G)       |
| 7692        | CakSNP7692     | <i>Kabuli</i>    | <i>Ca_Kabuli_Chr05</i>       | 245863                         | (A/T)       |
| 7693        | CakSNP7693     | <i>Kabuli</i>    | <i>Ca_Kabuli_Chr05</i>       | 245896                         | (A/T)       |
| 7694        | CakSNP7694     | <i>Kabuli</i>    | <i>Ca_Kabuli_Chr05</i>       | 246466                         | (A/T)       |
| 7695        | CakSNP7695     | <i>Kabuli</i>    | <i>Ca_Kabuli_Chr05</i>       | 246654                         | (A/G)       |
| 7696        | CakSNP7696     | <i>Kabuli</i>    | <i>Ca_Kabuli_Chr05</i>       | 256745                         | (G/A)       |
| 7697        | CakSNP7697     | <i>Kabuli</i>    | <i>Ca_Kabuli_Chr05</i>       | 272972                         | (T/A)       |
| 7698        | CakSNP7698     | <i>Kabuli</i>    | <i>Ca_Kabuli_Chr05</i>       | 277040                         | (G/A)       |
| 7699        | CakSNP7699     | <i>Kabuli</i>    | <i>Ca_Kabuli_Chr05</i>       | 277316                         | (T/A)       |
| 7700        | CakSNP7700     | <i>Kabuli</i>    | <i>Ca_Kabuli_Chr05</i>       | 343517                         | (C/T)       |
| 7701        | CakSNP7701     | <i>Kabuli</i>    | <i>Ca_Kabuli_Chr05</i>       | 353792                         | (T/A)       |
| 7702        | CakSNP7702     | <i>Kabuli</i>    | <i>Ca_Kabuli_Chr05</i>       | 438448                         | (C/A)       |
| 7703        | CakSNP7703     | <i>Kabuli</i>    | <i>Ca_Kabuli_Chr05</i>       | 438445                         | (C/A)       |
| 7704        | CakSNP7704     | <i>Kabuli</i>    | <i>Ca_Kabuli_Chr05</i>       | 438442                         | (T/C)       |
| 7705        | CakSNP7705     | <i>Kabuli</i>    | <i>Ca_Kabuli_Chr05</i>       | 443309                         | (A/T)       |
| 7706        | CakSNP7706     | <i>Kabuli</i>    | <i>Ca_Kabuli_Chr05</i>       | 469397                         | (G/A)       |
| 7707        | CakSNP7707     | <i>Kabuli</i>    | <i>Ca_Kabuli_Chr05</i>       | 805859                         | (C/T)       |
| 7708        | CakSNP7708     | <i>Kabuli</i>    | <i>Ca_Kabuli_Chr05</i>       | 805882                         | (A/T)       |
| 7709        | CakSNP7709     | <i>Kabuli</i>    | <i>Ca_Kabuli_Chr05</i>       | 805883                         | (G/T)       |
| 7710        | CakSNP7710     | <i>Kabuli</i>    | <i>Ca_Kabuli_Chr05</i>       | 805910                         | (G/A)       |
| 7711        | CakSNP7711     | <i>Kabuli</i>    | <i>Ca_Kabuli_Chr05</i>       | 870867                         | (A/G)       |
| 7712        | CakSNP7712     | <i>Kabuli</i>    | <i>Ca_Kabuli_Chr05</i>       | 870909                         | (G/A)       |
| 7713        | CakSNP7713     | <i>Kabuli</i>    | <i>Ca_Kabuli_Chr05</i>       | 925554                         | (T/C)       |
| 7714        | CakSNP7714     | <i>Kabuli</i>    | <i>Ca_Kabuli_Chr05</i>       | 925493                         | (T/C)       |
| 7715        | CakSNP7715     | <i>Kabuli</i>    | <i>Ca_Kabuli_Chr05</i>       | 1141755                        | (C/T)       |
| 7716        | CakSNP7716     | <i>Kabuli</i>    | <i>Ca_Kabuli_Chr05</i>       | 1220867                        | (A/G)       |
| 7717        | CakSNP7717     | <i>Kabuli</i>    | <i>Ca_Kabuli_Chr05</i>       | 1252394                        | (G/A)       |
| 7718        | CakSNP7718     | <i>Kabuli</i>    | <i>Ca_Kabuli_Chr05</i>       | 1252388                        | (A/T)       |
| 7719        | CakSNP7719     | <i>Kabuli</i>    | <i>Ca_Kabuli_Chr05</i>       | 1270830                        | (T/C)       |
| 7720        | CakSNP7720     | <i>Kabuli</i>    | <i>Ca_Kabuli_Chr05</i>       | 1272581                        | (T/C)       |

| <b>S.N.</b> | <b>SNP IDs</b> | <b>Cultivars</b> | <b>Chromosomes/scaffolds</b> | <b>Physical positions (bp)</b> | <b>SNPs</b> |
|-------------|----------------|------------------|------------------------------|--------------------------------|-------------|
| 7721        | CakSNP7721     | Kabuli           | Ca_Kabuli_Chr05              | 1280977                        | (T/G)       |
| 7722        | CakSNP7722     | Kabuli           | Ca_Kabuli_Chr05              | 1281006                        | (A/C)       |
| 7723        | CakSNP7723     | Kabuli           | Ca_Kabuli_Chr05              | 1281017                        | (G/A)       |
| 7724        | CakSNP7724     | Kabuli           | Ca_Kabuli_Chr05              | 1281021                        | (C/T)       |
| 7725        | CakSNP7725     | Kabuli           | Ca_Kabuli_Chr05              | 1534904                        | (C/T)       |
| 7726        | CakSNP7726     | Kabuli           | Ca_Kabuli_Chr05              | 1534901                        | (C/T)       |
| 7727        | CakSNP7727     | Kabuli           | Ca_Kabuli_Chr05              | 1534888                        | (T/C)       |
| 7728        | CakSNP7728     | Kabuli           | Ca_Kabuli_Chr05              | 2166586                        | (A/G)       |
| 7729        | CakSNP7729     | Kabuli           | Ca_Kabuli_Chr05              | 2519977                        | (C/T)       |
| 7730        | CakSNP7730     | Kabuli           | Ca_Kabuli_Chr05              | 2519949                        | (C/T)       |
| 7731        | CakSNP7731     | Kabuli           | Ca_Kabuli_Chr05              | 2519961                        | (G/A)       |
| 7732        | CakSNP7732     | Kabuli           | Ca_Kabuli_Chr05              | 2519976                        | (G/A)       |
| 7733        | CakSNP7733     | Kabuli           | Ca_Kabuli_Chr05              | 2520035                        | (G/A)       |
| 7734        | CakSNP7734     | Kabuli           | Ca_Kabuli_Chr05              | 2520058                        | (C/T)       |
| 7735        | CakSNP7735     | Kabuli           | Ca_Kabuli_Chr05              | 2520015                        | (C/G)       |
| 7736        | CakSNP7736     | Kabuli           | Ca_Kabuli_Chr05              | 2520049                        | (C/T)       |
| 7737        | CakSNP7737     | Kabuli           | Ca_Kabuli_Chr05              | 2520050                        | (G/C)       |
| 7738        | CakSNP7738     | Kabuli           | Ca_Kabuli_Chr05              | 2520051                        | (G/T)       |
| 7739        | CakSNP7739     | Kabuli           | Ca_Kabuli_Chr05              | 2520055                        | (C/T)       |
| 7740        | CakSNP7740     | Kabuli           | Ca_Kabuli_Chr05              | 2520068                        | (T/A)       |
| 7741        | CakSNP7741     | Kabuli           | Ca_Kabuli_Chr05              | 2520069                        | (C/T)       |
| 7742        | CakSNP7742     | Kabuli           | Ca_Kabuli_Chr05              | 2520094                        | (G/A)       |
| 7743        | CakSNP7743     | Kabuli           | Ca_Kabuli_Chr05              | 2520061                        | (C/T)       |
| 7744        | CakSNP7744     | Kabuli           | Ca_Kabuli_Chr05              | 2520093                        | (G/A)       |
| 7745        | CakSNP7745     | Kabuli           | Ca_Kabuli_Chr05              | 2520123                        | (A/G)       |
| 7746        | CakSNP7746     | Kabuli           | Ca_Kabuli_Chr05              | 2520114                        | (G/A)       |
| 7747        | CakSNP7747     | Kabuli           | Ca_Kabuli_Chr05              | 2520109                        | (G/A)       |
| 7748        | CakSNP7748     | Kabuli           | Ca_Kabuli_Chr05              | 2520101                        | (C/T)       |
| 7749        | CakSNP7749     | Kabuli           | Ca_Kabuli_Chr05              | 2613423                        | (T/G)       |
| 7750        | CakSNP7750     | Kabuli           | Ca_Kabuli_Chr05              | 2948530                        | (G/T)       |
| 7751        | CakSNP7751     | Kabuli           | Ca_Kabuli_Chr05              | 2948531                        | (T/C)       |
| 7752        | CakSNP7752     | Kabuli           | Ca_Kabuli_Chr05              | 2948549                        | (C/A)       |
| 7753        | CakSNP7753     | Kabuli           | Ca_Kabuli_Chr05              | 2948592                        | (T/C)       |
| 7754        | CakSNP7754     | Kabuli           | Ca_Kabuli_Chr05              | 2948596                        | (C/T)       |
| 7755        | CakSNP7755     | Kabuli           | Ca_Kabuli_Chr05              | 2948616                        | (G/A)       |
| 7756        | CakSNP7756     | Kabuli           | Ca_Kabuli_Chr05              | 2948698                        | (G/A)       |
| 7757        | CakSNP7757     | Kabuli           | Ca_Kabuli_Chr05              | 2948977                        | (G/A)       |
| 7758        | CakSNP7758     | Kabuli           | Ca_Kabuli_Chr05              | 3007213                        | (A/G)       |
| 7759        | CakSNP7759     | Kabuli           | Ca_Kabuli_Chr05              | 3007316                        | (T/C)       |



| <b>S.N.</b> | <b>SNP IDs</b> | <b>Cultivars</b> | <b>Chromosomes/scaffolds</b> | <b>Physical positions (bp)</b> | <b>SNPs</b> |
|-------------|----------------|------------------|------------------------------|--------------------------------|-------------|
| 7760        | CakSNP7760     | <i>Kabuli</i>    | <i>Ca_Kabuli_Chr05</i>       | 3040264                        | (G/T)       |
| 7761        | CakSNP7761     | <i>Kabuli</i>    | <i>Ca_Kabuli_Chr05</i>       | 3040948                        | (G/C)       |
| 7762        | CakSNP7762     | <i>Kabuli</i>    | <i>Ca_Kabuli_Chr05</i>       | 3159061                        | (G/A)       |
| 7763        | CakSNP7763     | <i>Kabuli</i>    | <i>Ca_Kabuli_Chr05</i>       | 3348291                        | (G/A)       |
| 7764        | CakSNP7764     | <i>Kabuli</i>    | <i>Ca_Kabuli_Chr05</i>       | 3348310                        | (A/G)       |
| 7765        | CakSNP7765     | <i>Kabuli</i>    | <i>Ca_Kabuli_Chr05</i>       | 3348366                        | (G/C)       |
| 7766        | CakSNP7766     | <i>Kabuli</i>    | <i>Ca_Kabuli_Chr05</i>       | 3353052                        | (A/G)       |
| 7767        | CakSNP7767     | <i>Kabuli</i>    | <i>Ca_Kabuli_Chr05</i>       | 4122395                        | (T/C)       |
| 7768        | CakSNP7768     | <i>Kabuli</i>    | <i>Ca_Kabuli_Chr05</i>       | 4122342                        | (T/C)       |
| 7769        | CakSNP7769     | <i>Kabuli</i>    | <i>Ca_Kabuli_Chr05</i>       | 5133644                        | (A/G)       |
| 7770        | CakSNP7770     | <i>Kabuli</i>    | <i>Ca_Kabuli_Chr05</i>       | 5205261                        | (T/G)       |
| 7771        | CakSNP7771     | <i>Kabuli</i>    | <i>Ca_Kabuli_Chr05</i>       | 5404261                        | (G/A)       |
| 7772        | CakSNP7772     | <i>Kabuli</i>    | <i>Ca_Kabuli_Chr05</i>       | 6190494                        | (T/C)       |
| 7773        | CakSNP7773     | <i>Kabuli</i>    | <i>Ca_Kabuli_Chr05</i>       | 6225426                        | (T/A)       |
| 7774        | CakSNP7774     | <i>Kabuli</i>    | <i>Ca_Kabuli_Chr05</i>       | 6225415                        | (G/C)       |
| 7775        | CakSNP7775     | <i>Kabuli</i>    | <i>Ca_Kabuli_Chr05</i>       | 6225410                        | (T/A)       |
| 7776        | CakSNP7776     | <i>Kabuli</i>    | <i>Ca_Kabuli_Chr05</i>       | 6290453                        | (G/A)       |
| 7777        | CakSNP7777     | <i>Kabuli</i>    | <i>Ca_Kabuli_Chr05</i>       | 6300337                        | (C/A)       |
| 7778        | CakSNP7778     | <i>Kabuli</i>    | <i>Ca_Kabuli_Chr05</i>       | 6300360                        | (C/A)       |
| 7779        | CakSNP7779     | <i>Kabuli</i>    | <i>Ca_Kabuli_Chr05</i>       | 6300502                        | (C/A)       |
| 7780        | CakSNP7780     | <i>Kabuli</i>    | <i>Ca_Kabuli_Chr05</i>       | 6316787                        | (C/T)       |
| 7781        | CakSNP7781     | <i>Kabuli</i>    | <i>Ca_Kabuli_Chr05</i>       | 6317014                        | (C/T)       |
| 7782        | CakSNP7782     | <i>Kabuli</i>    | <i>Ca_Kabuli_Chr05</i>       | 6931865                        | (A/G)       |
| 7783        | CakSNP7783     | <i>Kabuli</i>    | <i>Ca_Kabuli_Chr05</i>       | 7082295                        | (G/A)       |
| 7784        | CakSNP7784     | <i>Kabuli</i>    | <i>Ca_Kabuli_Chr05</i>       | 7082296                        | (T/G)       |
| 7785        | CakSNP7785     | <i>Kabuli</i>    | <i>Ca_Kabuli_Chr05</i>       | 7082301                        | (G/T)       |
| 7786        | CakSNP7786     | <i>Kabuli</i>    | <i>Ca_Kabuli_Chr05</i>       | 7278953                        | (C/T)       |
| 7787        | CakSNP7787     | <i>Kabuli</i>    | <i>Ca_Kabuli_Chr05</i>       | 7398246                        | (A/C)       |
| 7788        | CakSNP7788     | <i>Kabuli</i>    | <i>Ca_Kabuli_Chr05</i>       | 7425116                        | (C/T)       |
| 7789        | CakSNP7789     | <i>Kabuli</i>    | <i>Ca_Kabuli_Chr05</i>       | 7617914                        | (T/A)       |
| 7790        | CakSNP7790     | <i>Kabuli</i>    | <i>Ca_Kabuli_Chr05</i>       | 7628097                        | (C/A)       |
| 7791        | CakSNP7791     | <i>Kabuli</i>    | <i>Ca_Kabuli_Chr05</i>       | 7641993                        | (T/C)       |
| 7792        | CakSNP7792     | <i>Kabuli</i>    | <i>Ca_Kabuli_Chr05</i>       | 7641925                        | (G/T)       |
| 7793        | CakSNP7793     | <i>Kabuli</i>    | <i>Ca_Kabuli_Chr05</i>       | 7641923                        | (A/G)       |
| 7794        | CakSNP7794     | <i>Kabuli</i>    | <i>Ca_Kabuli_Chr05</i>       | 7664421                        | (T/C)       |
| 7795        | CakSNP7795     | <i>Kabuli</i>    | <i>Ca_Kabuli_Chr05</i>       | 7775286                        | (C/A)       |
| 7796        | CakSNP7796     | <i>Kabuli</i>    | <i>Ca_Kabuli_Chr05</i>       | 7775290                        | (A/T)       |
| 7797        | CakSNP7797     | <i>Kabuli</i>    | <i>Ca_Kabuli_Chr05</i>       | 7775298                        | (A/T)       |
| 7798        | CakSNP7798     | <i>Kabuli</i>    | <i>Ca_Kabuli_Chr05</i>       | 7775329                        | (A/G)       |

| <b>S.N.</b> | <b>SNP IDs</b> | <b>Cultivars</b> | <b>Chromosomes/scaffolds</b> | <b>Physical positions (bp)</b> | <b>SNPs</b> |
|-------------|----------------|------------------|------------------------------|--------------------------------|-------------|
| 7799        | CakSNP7799     | <i>Kabuli</i>    | <i>Ca_Kabuli_Chr05</i>       | 7775516                        | (A/G)       |
| 7800        | CakSNP7800     | <i>Kabuli</i>    | <i>Ca_Kabuli_Chr05</i>       | 7775497                        | (G/C)       |
| 7801        | CakSNP7801     | <i>Kabuli</i>    | <i>Ca_Kabuli_Chr05</i>       | 7775472                        | (G/A)       |
| 7802        | CakSNP7802     | <i>Kabuli</i>    | <i>Ca_Kabuli_Chr05</i>       | 7775456                        | (T/C)       |
| 7803        | CakSNP7803     | <i>Kabuli</i>    | <i>Ca_Kabuli_Chr05</i>       | 7775918                        | (C/T)       |
| 7804        | CakSNP7804     | <i>Kabuli</i>    | <i>Ca_Kabuli_Chr05</i>       | 7789021                        | (G/T)       |
| 7805        | CakSNP7805     | <i>Kabuli</i>    | <i>Ca_Kabuli_Chr05</i>       | 7789065                        | (A/G)       |
| 7806        | CakSNP7806     | <i>Kabuli</i>    | <i>Ca_Kabuli_Chr05</i>       | 7826336                        | (G/T)       |
| 7807        | CakSNP7807     | <i>Kabuli</i>    | <i>Ca_Kabuli_Chr05</i>       | 7826338                        | (T/G)       |
| 7808        | CakSNP7808     | <i>Kabuli</i>    | <i>Ca_Kabuli_Chr05</i>       | 7826362                        | (C/T)       |
| 7809        | CakSNP7809     | <i>Kabuli</i>    | <i>Ca_Kabuli_Chr05</i>       | 7826366                        | (A/G)       |
| 7810        | CakSNP7810     | <i>Kabuli</i>    | <i>Ca_Kabuli_Chr05</i>       | 7925356                        | (A/C)       |
| 7811        | CakSNP7811     | <i>Kabuli</i>    | <i>Ca_Kabuli_Chr05</i>       | 8263483                        | (A/G)       |
| 7812        | CakSNP7812     | <i>Kabuli</i>    | <i>Ca_Kabuli_Chr05</i>       | 8653283                        | (G/A)       |
| 7813        | CakSNP7813     | <i>Kabuli</i>    | <i>Ca_Kabuli_Chr05</i>       | 8676750                        | (T/G)       |
| 7814        | CakSNP7814     | <i>Kabuli</i>    | <i>Ca_Kabuli_Chr05</i>       | 8676807                        | (G/A)       |
| 7815        | CakSNP7815     | <i>Kabuli</i>    | <i>Ca_Kabuli_Chr05</i>       | 8676789                        | (T/C)       |
| 7816        | CakSNP7816     | <i>Kabuli</i>    | <i>Ca_Kabuli_Chr05</i>       | 8676771                        | (G/A)       |
| 7817        | CakSNP7817     | <i>Kabuli</i>    | <i>Ca_Kabuli_Chr05</i>       | 8946218                        | (G/A)       |
| 7818        | CakSNP7818     | <i>Kabuli</i>    | <i>Ca_Kabuli_Chr05</i>       | 9034100                        | (C/G)       |
| 7819        | CakSNP7819     | <i>Kabuli</i>    | <i>Ca_Kabuli_Chr05</i>       | 9076709                        | (C/T)       |
| 7820        | CakSNP7820     | <i>Kabuli</i>    | <i>Ca_Kabuli_Chr05</i>       | 9076712                        | (G/A)       |
| 7821        | CakSNP7821     | <i>Kabuli</i>    | <i>Ca_Kabuli_Chr05</i>       | 9076737                        | (C/A)       |
| 7822        | CakSNP7822     | <i>Kabuli</i>    | <i>Ca_Kabuli_Chr05</i>       | 9076738                        | (G/C)       |
| 7823        | CakSNP7823     | <i>Kabuli</i>    | <i>Ca_Kabuli_Chr05</i>       | 9076767                        | (C/A)       |
| 7824        | CakSNP7824     | <i>Kabuli</i>    | <i>Ca_Kabuli_Chr05</i>       | 9076824                        | (G/A)       |
| 7825        | CakSNP7825     | <i>Kabuli</i>    | <i>Ca_Kabuli_Chr05</i>       | 9076821                        | (G/T)       |
| 7826        | CakSNP7826     | <i>Kabuli</i>    | <i>Ca_Kabuli_Chr05</i>       | 9076809                        | (T/A)       |
| 7827        | CakSNP7827     | <i>Kabuli</i>    | <i>Ca_Kabuli_Chr05</i>       | 9077489                        | (T/C)       |
| 7828        | CakSNP7828     | <i>Kabuli</i>    | <i>Ca_Kabuli_Chr05</i>       | 9519382                        | (C/A)       |
| 7829        | CakSNP7829     | <i>Kabuli</i>    | <i>Ca_Kabuli_Chr05</i>       | 9519390                        | (G/A)       |
| 7830        | CakSNP7830     | <i>Kabuli</i>    | <i>Ca_Kabuli_Chr05</i>       | 9609055                        | (T/C)       |
| 7831        | CakSNP7831     | <i>Kabuli</i>    | <i>Ca_Kabuli_Chr05</i>       | 9620998                        | (A/C)       |
| 7832        | CakSNP7832     | <i>Kabuli</i>    | <i>Ca_Kabuli_Chr05</i>       | 9728498                        | (A/T)       |
| 7833        | CakSNP7833     | <i>Kabuli</i>    | <i>Ca_Kabuli_Chr05</i>       | 9728609                        | (T/A)       |
| 7834        | CakSNP7834     | <i>Kabuli</i>    | <i>Ca_Kabuli_Chr05</i>       | 9728591                        | (A/G)       |
| 7835        | CakSNP7835     | <i>Kabuli</i>    | <i>Ca_Kabuli_Chr05</i>       | 9786213                        | (C/A)       |
| 7836        | CakSNP7836     | <i>Kabuli</i>    | <i>Ca_Kabuli_Chr05</i>       | 9868796                        | (T/C)       |
| 7837        | CakSNP7837     | <i>Kabuli</i>    | <i>Ca_Kabuli_Chr05</i>       | 9869005                        | (T/G)       |

| <b>S.N.</b> | <b>SNP IDs</b> | <b>Cultivars</b> | <b>Chromosomes/scaffolds</b> | <b>Physical positions (bp)</b> | <b>SNPs</b> |
|-------------|----------------|------------------|------------------------------|--------------------------------|-------------|
| 7838        | CakSNP7838     | <i>Kabuli</i>    | <i>Ca_Kabuli_Chr05</i>       | 9961273                        | (T/C)       |
| 7839        | CakSNP7839     | <i>Kabuli</i>    | <i>Ca_Kabuli_Chr05</i>       | 9961396                        | (T/C)       |
| 7840        | CakSNP7840     | <i>Kabuli</i>    | <i>Ca_Kabuli_Chr05</i>       | 9961380                        | (C/T)       |
| 7841        | CakSNP7841     | <i>Kabuli</i>    | <i>Ca_Kabuli_Chr05</i>       | 9965880                        | (G/C)       |
| 7842        | CakSNP7842     | <i>Kabuli</i>    | <i>Ca_Kabuli_Chr05</i>       | 9965890                        | (T/C)       |
| 7843        | CakSNP7843     | <i>Kabuli</i>    | <i>Ca_Kabuli_Chr05</i>       | 9965913                        | (A/C)       |
| 7844        | CakSNP7844     | <i>Kabuli</i>    | <i>Ca_Kabuli_Chr05</i>       | 9965848                        | (T/C)       |
| 7845        | CakSNP7845     | <i>Kabuli</i>    | <i>Ca_Kabuli_Chr05</i>       | 9965846                        | (A/C)       |
| 7846        | CakSNP7846     | <i>Kabuli</i>    | <i>Ca_Kabuli_Chr05</i>       | 10004386                       | (G/T)       |
| 7847        | CakSNP7847     | <i>Kabuli</i>    | <i>Ca_Kabuli_Chr05</i>       | 10004427                       | (T/G)       |
| 7848        | CakSNP7848     | <i>Kabuli</i>    | <i>Ca_Kabuli_Chr05</i>       | 10004430                       | (T/G)       |
| 7849        | CakSNP7849     | <i>Kabuli</i>    | <i>Ca_Kabuli_Chr05</i>       | 10004451                       | (T/G)       |
| 7850        | CakSNP7850     | <i>Kabuli</i>    | <i>Ca_Kabuli_Chr05</i>       | 10054140                       | (G/C)       |
| 7851        | CakSNP7851     | <i>Kabuli</i>    | <i>Ca_Kabuli_Chr05</i>       | 10054146                       | (A/G)       |
| 7852        | CakSNP7852     | <i>Kabuli</i>    | <i>Ca_Kabuli_Chr05</i>       | 10054266                       | (T/C)       |
| 7853        | CakSNP7853     | <i>Kabuli</i>    | <i>Ca_Kabuli_Chr05</i>       | 10054213                       | (A/C)       |
| 7854        | CakSNP7854     | <i>Kabuli</i>    | <i>Ca_Kabuli_Chr05</i>       | 10072358                       | (G/A)       |
| 7855        | CakSNP7855     | <i>Kabuli</i>    | <i>Ca_Kabuli_Chr05</i>       | 10072403                       | (G/C)       |
| 7856        | CakSNP7856     | <i>Kabuli</i>    | <i>Ca_Kabuli_Chr05</i>       | 10154016                       | (A/G)       |
| 7857        | CakSNP7857     | <i>Kabuli</i>    | <i>Ca_Kabuli_Chr05</i>       | 10247223                       | (T/C)       |
| 7858        | CakSNP7858     | <i>Kabuli</i>    | <i>Ca_Kabuli_Chr05</i>       | 10247224                       | (T/A)       |
| 7859        | CakSNP7859     | <i>Kabuli</i>    | <i>Ca_Kabuli_Chr05</i>       | 10247233                       | (C/T)       |
| 7860        | CakSNP7860     | <i>Kabuli</i>    | <i>Ca_Kabuli_Chr05</i>       | 10247244                       | (C/T)       |
| 7861        | CakSNP7861     | <i>Kabuli</i>    | <i>Ca_Kabuli_Chr05</i>       | 10390882                       | (C/T)       |
| 7862        | CakSNP7862     | <i>Kabuli</i>    | <i>Ca_Kabuli_Chr05</i>       | 10406562                       | (C/A)       |
| 7863        | CakSNP7863     | <i>Kabuli</i>    | <i>Ca_Kabuli_Chr05</i>       | 10406602                       | (C/T)       |
| 7864        | CakSNP7864     | <i>Kabuli</i>    | <i>Ca_Kabuli_Chr05</i>       | 10406613                       | (C/T)       |
| 7865        | CakSNP7865     | <i>Kabuli</i>    | <i>Ca_Kabuli_Chr05</i>       | 10406636                       | (A/G)       |
| 7866        | CakSNP7866     | <i>Kabuli</i>    | <i>Ca_Kabuli_Chr05</i>       | 10406649                       | (A/C)       |
| 7867        | CakSNP7867     | <i>Kabuli</i>    | <i>Ca_Kabuli_Chr05</i>       | 10406650                       | (A/G)       |
| 7868        | CakSNP7868     | <i>Kabuli</i>    | <i>Ca_Kabuli_Chr05</i>       | 10406754                       | (G/T)       |
| 7869        | CakSNP7869     | <i>Kabuli</i>    | <i>Ca_Kabuli_Chr05</i>       | 10510166                       | (G/A)       |
| 7870        | CakSNP7870     | <i>Kabuli</i>    | <i>Ca_Kabuli_Chr05</i>       | 10544823                       | (A/G)       |
| 7871        | CakSNP7871     | <i>Kabuli</i>    | <i>Ca_Kabuli_Chr05</i>       | 10546944                       | (A/T)       |
| 7872        | CakSNP7872     | <i>Kabuli</i>    | <i>Ca_Kabuli_Chr05</i>       | 10675252                       | (A/G)       |
| 7873        | CakSNP7873     | <i>Kabuli</i>    | <i>Ca_Kabuli_Chr05</i>       | 10675279                       | (C/G)       |
| 7874        | CakSNP7874     | <i>Kabuli</i>    | <i>Ca_Kabuli_Chr05</i>       | 10675294                       | (A/G)       |
| 7875        | CakSNP7875     | <i>Kabuli</i>    | <i>Ca_Kabuli_Chr05</i>       | 10769765                       | (C/T)       |
| 7876        | CakSNP7876     | <i>Kabuli</i>    | <i>Ca_Kabuli_Chr05</i>       | 10832275                       | (T/C)       |

| <b>S.N.</b> | <b>SNP IDs</b> | <b>Cultivars</b> | <b>Chromosomes/scaffolds</b> | <b>Physical positions (bp)</b> | <b>SNPs</b> |
|-------------|----------------|------------------|------------------------------|--------------------------------|-------------|
| 7877        | CakSNP7877     | <i>Kabuli</i>    | <i>Ca_Kabuli_Chr05</i>       | 10858490                       | (C/T)       |
| 7878        | CakSNP7878     | <i>Kabuli</i>    | <i>Ca_Kabuli_Chr05</i>       | 10918368                       | (A/G)       |
| 7879        | CakSNP7879     | <i>Kabuli</i>    | <i>Ca_Kabuli_Chr05</i>       | 10919246                       | (C/G)       |
| 7880        | CakSNP7880     | <i>Kabuli</i>    | <i>Ca_Kabuli_Chr05</i>       | 11230617                       | (C/G)       |
| 7881        | CakSNP7881     | <i>Kabuli</i>    | <i>Ca_Kabuli_Chr05</i>       | 11230627                       | (A/G)       |
| 7882        | CakSNP7882     | <i>Kabuli</i>    | <i>Ca_Kabuli_Chr05</i>       | 11230648                       | (G/A)       |
| 7883        | CakSNP7883     | <i>Kabuli</i>    | <i>Ca_Kabuli_Chr05</i>       | 11230671                       | (T/C)       |
| 7884        | CakSNP7884     | <i>Kabuli</i>    | <i>Ca_Kabuli_Chr05</i>       | 11263571                       | (C/G)       |
| 7885        | CakSNP7885     | <i>Kabuli</i>    | <i>Ca_Kabuli_Chr05</i>       | 11263574                       | (C/A)       |
| 7886        | CakSNP7886     | <i>Kabuli</i>    | <i>Ca_Kabuli_Chr05</i>       | 11317487                       | (C/T)       |
| 7887        | CakSNP7887     | <i>Kabuli</i>    | <i>Ca_Kabuli_Chr05</i>       | 11317502                       | (C/A)       |
| 7888        | CakSNP7888     | <i>Kabuli</i>    | <i>Ca_Kabuli_Chr05</i>       | 11317534                       | (C/A)       |
| 7889        | CakSNP7889     | <i>Kabuli</i>    | <i>Ca_Kabuli_Chr05</i>       | 11385780                       | (A/C)       |
| 7890        | CakSNP7890     | <i>Kabuli</i>    | <i>Ca_Kabuli_Chr05</i>       | 11385874                       | (A/G)       |
| 7891        | CakSNP7891     | <i>Kabuli</i>    | <i>Ca_Kabuli_Chr05</i>       | 11765841                       | (C/T)       |
| 7892        | CakSNP7892     | <i>Kabuli</i>    | <i>Ca_Kabuli_Chr05</i>       | 11777112                       | (C/T)       |
| 7893        | CakSNP7893     | <i>Kabuli</i>    | <i>Ca_Kabuli_Chr05</i>       | 11807822                       | (G/T)       |
| 7894        | CakSNP7894     | <i>Kabuli</i>    | <i>Ca_Kabuli_Chr05</i>       | 11807842                       | (T/C)       |
| 7895        | CakSNP7895     | <i>Kabuli</i>    | <i>Ca_Kabuli_Chr05</i>       | 11845515                       | (C/T)       |
| 7896        | CakSNP7896     | <i>Kabuli</i>    | <i>Ca_Kabuli_Chr05</i>       | 11853090                       | (C/T)       |
| 7897        | CakSNP7897     | <i>Kabuli</i>    | <i>Ca_Kabuli_Chr05</i>       | 11864959                       | (T/C)       |
| 7898        | CakSNP7898     | <i>Kabuli</i>    | <i>Ca_Kabuli_Chr05</i>       | 12044714                       | (A/G)       |
| 7899        | CakSNP7899     | <i>Kabuli</i>    | <i>Ca_Kabuli_Chr05</i>       | 12157678                       | (A/G)       |
| 7900        | CakSNP7900     | <i>Kabuli</i>    | <i>Ca_Kabuli_Chr05</i>       | 12157683                       | (T/C)       |
| 7901        | CakSNP7901     | <i>Kabuli</i>    | <i>Ca_Kabuli_Chr05</i>       | 12157688                       | (C/T)       |
| 7902        | CakSNP7902     | <i>Kabuli</i>    | <i>Ca_Kabuli_Chr05</i>       | 12157706                       | (G/A)       |
| 7903        | CakSNP7903     | <i>Kabuli</i>    | <i>Ca_Kabuli_Chr05</i>       | 12157707                       | (C/T)       |
| 7904        | CakSNP7904     | <i>Kabuli</i>    | <i>Ca_Kabuli_Chr05</i>       | 12157710                       | (A/C)       |
| 7905        | CakSNP7905     | <i>Kabuli</i>    | <i>Ca_Kabuli_Chr05</i>       | 12157742                       | (C/A)       |
| 7906        | CakSNP7906     | <i>Kabuli</i>    | <i>Ca_Kabuli_Chr05</i>       | 12157699                       | (G/T)       |
| 7907        | CakSNP7907     | <i>Kabuli</i>    | <i>Ca_Kabuli_Chr05</i>       | 12162108                       | (T/G)       |
| 7908        | CakSNP7908     | <i>Kabuli</i>    | <i>Ca_Kabuli_Chr05</i>       | 12162156                       | (T/C)       |
| 7909        | CakSNP7909     | <i>Kabuli</i>    | <i>Ca_Kabuli_Chr05</i>       | 12162160                       | (G/T)       |
| 7910        | CakSNP7910     | <i>Kabuli</i>    | <i>Ca_Kabuli_Chr05</i>       | 12162164                       | (C/G)       |
| 7911        | CakSNP7911     | <i>Kabuli</i>    | <i>Ca_Kabuli_Chr05</i>       | 12198014                       | (G/A)       |
| 7912        | CakSNP7912     | <i>Kabuli</i>    | <i>Ca_Kabuli_Chr05</i>       | 12204521                       | (T/A)       |
| 7913        | CakSNP7913     | <i>Kabuli</i>    | <i>Ca_Kabuli_Chr05</i>       | 12204588                       | (A/G)       |
| 7914        | CakSNP7914     | <i>Kabuli</i>    | <i>Ca_Kabuli_Chr05</i>       | 12427931                       | (C/T)       |
| 7915        | CakSNP7915     | <i>Kabuli</i>    | <i>Ca_Kabuli_Chr05</i>       | 12427940                       | (T/A)       |

| <b>S.N.</b> | <b>SNP IDs</b> | <b>Cultivars</b> | <b>Chromosomes/scaffolds</b> | <b>Physical positions (bp)</b> | <b>SNPs</b> |
|-------------|----------------|------------------|------------------------------|--------------------------------|-------------|
| 7916        | CakSNP7916     | <i>Kabuli</i>    | <i>Ca_Kabuli_Chr05</i>       | 12427970                       | (T/C)       |
| 7917        | CakSNP7917     | <i>Kabuli</i>    | <i>Ca_Kabuli_Chr05</i>       | 12427969                       | (T/C)       |
| 7918        | CakSNP7918     | <i>Kabuli</i>    | <i>Ca_Kabuli_Chr05</i>       | 12427966                       | (T/C)       |
| 7919        | CakSNP7919     | <i>Kabuli</i>    | <i>Ca_Kabuli_Chr05</i>       | 12428027                       | (G/A)       |
| 7920        | CakSNP7920     | <i>Kabuli</i>    | <i>Ca_Kabuli_Chr05</i>       | 12428121                       | (A/T)       |
| 7921        | CakSNP7921     | <i>Kabuli</i>    | <i>Ca_Kabuli_Chr05</i>       | 12428120                       | (G/A)       |
| 7922        | CakSNP7922     | <i>Kabuli</i>    | <i>Ca_Kabuli_Chr05</i>       | 12428102                       | (A/G)       |
| 7923        | CakSNP7923     | <i>Kabuli</i>    | <i>Ca_Kabuli_Chr05</i>       | 12480948                       | (T/G)       |
| 7924        | CakSNP7924     | <i>Kabuli</i>    | <i>Ca_Kabuli_Chr05</i>       | 12553469                       | (A/C)       |
| 7925        | CakSNP7925     | <i>Kabuli</i>    | <i>Ca_Kabuli_Chr05</i>       | 12553470                       | (G/C)       |
| 7926        | CakSNP7926     | <i>Kabuli</i>    | <i>Ca_Kabuli_Chr05</i>       | 12590330                       | (A/G)       |
| 7927        | CakSNP7927     | <i>Kabuli</i>    | <i>Ca_Kabuli_Chr05</i>       | 12590361                       | (T/C)       |
| 7928        | CakSNP7928     | <i>Kabuli</i>    | <i>Ca_Kabuli_Chr05</i>       | 12590478                       | (T/C)       |
| 7929        | CakSNP7929     | <i>Kabuli</i>    | <i>Ca_Kabuli_Chr05</i>       | 12662138                       | (G/T)       |
| 7930        | CakSNP7930     | <i>Kabuli</i>    | <i>Ca_Kabuli_Chr05</i>       | 13982000                       | (T/G)       |
| 7931        | CakSNP7931     | <i>Kabuli</i>    | <i>Ca_Kabuli_Chr05</i>       | 13982041                       | (C/T)       |
| 7932        | CakSNP7932     | <i>Kabuli</i>    | <i>Ca_Kabuli_Chr05</i>       | 15401230                       | (C/T)       |
| 7933        | CakSNP7933     | <i>Kabuli</i>    | <i>Ca_Kabuli_Chr05</i>       | 15500782                       | (G/C)       |
| 7934        | CakSNP7934     | <i>Kabuli</i>    | <i>Ca_Kabuli_Chr05</i>       | 15548719                       | (G/A)       |
| 7935        | CakSNP7935     | <i>Kabuli</i>    | <i>Ca_Kabuli_Chr05</i>       | 15952395                       | (C/T)       |
| 7936        | CakSNP7936     | <i>Kabuli</i>    | <i>Ca_Kabuli_Chr05</i>       | 16227319                       | (G/T)       |
| 7937        | CakSNP7937     | <i>Kabuli</i>    | <i>Ca_Kabuli_Chr05</i>       | 16227321                       | (C/T)       |
| 7938        | CakSNP7938     | <i>Kabuli</i>    | <i>Ca_Kabuli_Chr05</i>       | 16227353                       | (G/A)       |
| 7939        | CakSNP7939     | <i>Kabuli</i>    | <i>Ca_Kabuli_Chr05</i>       | 16227395                       | (G/A)       |
| 7940        | CakSNP7940     | <i>Kabuli</i>    | <i>Ca_Kabuli_Chr05</i>       | 16227401                       | (G/A)       |
| 7941        | CakSNP7941     | <i>Kabuli</i>    | <i>Ca_Kabuli_Chr05</i>       | 16227408                       | (C/T)       |
| 7942        | CakSNP7942     | <i>Kabuli</i>    | <i>Ca_Kabuli_Chr05</i>       | 16426578                       | (G/A)       |
| 7943        | CakSNP7943     | <i>Kabuli</i>    | <i>Ca_Kabuli_Chr05</i>       | 16426575                       | (G/A)       |
| 7944        | CakSNP7944     | <i>Kabuli</i>    | <i>Ca_Kabuli_Chr05</i>       | 16426549                       | (G/A)       |
| 7945        | CakSNP7945     | <i>Kabuli</i>    | <i>Ca_Kabuli_Chr05</i>       | 16426662                       | (C/T)       |
| 7946        | CakSNP7946     | <i>Kabuli</i>    | <i>Ca_Kabuli_Chr05</i>       | 16426657                       | (C/T)       |
| 7947        | CakSNP7947     | <i>Kabuli</i>    | <i>Ca_Kabuli_Chr05</i>       | 16426656                       | (A/G)       |
| 7948        | CakSNP7948     | <i>Kabuli</i>    | <i>Ca_Kabuli_Chr05</i>       | 16426642                       | (A/G)       |
| 7949        | CakSNP7949     | <i>Kabuli</i>    | <i>Ca_Kabuli_Chr05</i>       | 16593880                       | (A/G)       |
| 7950        | CakSNP7950     | <i>Kabuli</i>    | <i>Ca_Kabuli_Chr05</i>       | 16751536                       | (C/T)       |
| 7951        | CakSNP7951     | <i>Kabuli</i>    | <i>Ca_Kabuli_Chr05</i>       | 16767134                       | (C/T)       |
| 7952        | CakSNP7952     | <i>Kabuli</i>    | <i>Ca_Kabuli_Chr05</i>       | 16821406                       | (A/G)       |
| 7953        | CakSNP7953     | <i>Kabuli</i>    | <i>Ca_Kabuli_Chr05</i>       | 16929903                       | (C/G)       |
| 7954        | CakSNP7954     | <i>Kabuli</i>    | <i>Ca_Kabuli_Chr05</i>       | 16929897                       | (A/G)       |

| <b>S.N.</b> | <b>SNP IDs</b> | <b>Cultivars</b> | <b>Chromosomes/scaffolds</b> | <b>Physical positions (bp)</b> | <b>SNPs</b> |
|-------------|----------------|------------------|------------------------------|--------------------------------|-------------|
| 7955        | CakSNP7955     | <i>Kabuli</i>    | <i>Ca_Kabuli_Chr05</i>       | 17037918                       | (G/T)       |
| 7956        | CakSNP7956     | <i>Kabuli</i>    | <i>Ca_Kabuli_Chr05</i>       | 17044340                       | (G/A)       |
| 7957        | CakSNP7957     | <i>Kabuli</i>    | <i>Ca_Kabuli_Chr05</i>       | 17044338                       | (G/A)       |
| 7958        | CakSNP7958     | <i>Kabuli</i>    | <i>Ca_Kabuli_Chr05</i>       | 17044332                       | (A/G)       |
| 7959        | CakSNP7959     | <i>Kabuli</i>    | <i>Ca_Kabuli_Chr05</i>       | 17045235                       | (T/C)       |
| 7960        | CakSNP7960     | <i>Kabuli</i>    | <i>Ca_Kabuli_Chr05</i>       | 17045244                       | (A/G)       |
| 7961        | CakSNP7961     | <i>Kabuli</i>    | <i>Ca_Kabuli_Chr05</i>       | 17045485                       | (T/G)       |
| 7962        | CakSNP7962     | <i>Kabuli</i>    | <i>Ca_Kabuli_Chr05</i>       | 17239612                       | (T/C)       |
| 7963        | CakSNP7963     | <i>Kabuli</i>    | <i>Ca_Kabuli_Chr05</i>       | 17494714                       | (A/G)       |
| 7964        | CakSNP7964     | <i>Kabuli</i>    | <i>Ca_Kabuli_Chr05</i>       | 17494702                       | (G/A)       |
| 7965        | CakSNP7965     | <i>Kabuli</i>    | <i>Ca_Kabuli_Chr05</i>       | 17494700                       | (T/C)       |
| 7966        | CakSNP7966     | <i>Kabuli</i>    | <i>Ca_Kabuli_Chr05</i>       | 17494697                       | (C/T)       |
| 7967        | CakSNP7967     | <i>Kabuli</i>    | <i>Ca_Kabuli_Chr05</i>       | 17494672                       | (C/T)       |
| 7968        | CakSNP7968     | <i>Kabuli</i>    | <i>Ca_Kabuli_Chr05</i>       | 17494699                       | (C/A)       |
| 7969        | CakSNP7969     | <i>Kabuli</i>    | <i>Ca_Kabuli_Chr05</i>       | 17494705                       | (A/T)       |
| 7970        | CakSNP7970     | <i>Kabuli</i>    | <i>Ca_Kabuli_Chr05</i>       | 17494710                       | (C/T)       |
| 7971        | CakSNP7971     | <i>Kabuli</i>    | <i>Ca_Kabuli_Chr05</i>       | 17494731                       | (A/T)       |
| 7972        | CakSNP7972     | <i>Kabuli</i>    | <i>Ca_Kabuli_Chr05</i>       | 18044808                       | (C/G)       |
| 7973        | CakSNP7973     | <i>Kabuli</i>    | <i>Ca_Kabuli_Chr05</i>       | 18664706                       | (C/T)       |
| 7974        | CakSNP7974     | <i>Kabuli</i>    | <i>Ca_Kabuli_Chr05</i>       | 18667782                       | (T/C)       |
| 7975        | CakSNP7975     | <i>Kabuli</i>    | <i>Ca_Kabuli_Chr05</i>       | 18667775                       | (T/C)       |
| 7976        | CakSNP7976     | <i>Kabuli</i>    | <i>Ca_Kabuli_Chr05</i>       | 18682788                       | (A/C)       |
| 7977        | CakSNP7977     | <i>Kabuli</i>    | <i>Ca_Kabuli_Chr05</i>       | 18682792                       | (T/C)       |
| 7978        | CakSNP7978     | <i>Kabuli</i>    | <i>Ca_Kabuli_Chr05</i>       | 18682793                       | (A/G)       |
| 7979        | CakSNP7979     | <i>Kabuli</i>    | <i>Ca_Kabuli_Chr05</i>       | 18682794                       | (A/G)       |
| 7980        | CakSNP7980     | <i>Kabuli</i>    | <i>Ca_Kabuli_Chr05</i>       | 18682812                       | (A/G)       |
| 7981        | CakSNP7981     | <i>Kabuli</i>    | <i>Ca_Kabuli_Chr05</i>       | 18682814                       | (T/A)       |
| 7982        | CakSNP7982     | <i>Kabuli</i>    | <i>Ca_Kabuli_Chr05</i>       | 18682822                       | (A/G)       |
| 7983        | CakSNP7983     | <i>Kabuli</i>    | <i>Ca_Kabuli_Chr05</i>       | 18682827                       | (C/G)       |
| 7984        | CakSNP7984     | <i>Kabuli</i>    | <i>Ca_Kabuli_Chr05</i>       | 18682830                       | (G/A)       |
| 7985        | CakSNP7985     | <i>Kabuli</i>    | <i>Ca_Kabuli_Chr05</i>       | 18684334                       | (C/T)       |
| 7986        | CakSNP7986     | <i>Kabuli</i>    | <i>Ca_Kabuli_Chr05</i>       | 18971085                       | (G/A)       |
| 7987        | CakSNP7987     | <i>Kabuli</i>    | <i>Ca_Kabuli_Chr05</i>       | 18971088                       | (C/A)       |
| 7988        | CakSNP7988     | <i>Kabuli</i>    | <i>Ca_Kabuli_Chr05</i>       | 19421820                       | (C/T)       |
| 7989        | CakSNP7989     | <i>Kabuli</i>    | <i>Ca_Kabuli_Chr05</i>       | 19421868                       | (C/T)       |
| 7990        | CakSNP7990     | <i>Kabuli</i>    | <i>Ca_Kabuli_Chr05</i>       | 19423387                       | (G/A)       |
| 7991        | CakSNP7991     | <i>Kabuli</i>    | <i>Ca_Kabuli_Chr05</i>       | 19423357                       | (C/T)       |
| 7992        | CakSNP7992     | <i>Kabuli</i>    | <i>Ca_Kabuli_Chr05</i>       | 19828124                       | (G/A)       |
| 7993        | CakSNP7993     | <i>Kabuli</i>    | <i>Ca_Kabuli_Chr05</i>       | 19828151                       | (C/A)       |

| <b>S.N.</b> | <b>SNP IDs</b> | <b>Cultivars</b> | <b>Chromosomes/scaffolds</b> | <b>Physical positions (bp)</b> | <b>SNPs</b> |
|-------------|----------------|------------------|------------------------------|--------------------------------|-------------|
| 7994        | CakSNP7994     | <i>Kabuli</i>    | <i>Ca_Kabuli_Chr05</i>       | 19828163                       | (C/T)       |
| 7995        | CakSNP7995     | <i>Kabuli</i>    | <i>Ca_Kabuli_Chr05</i>       | 19828166                       | (C/T)       |
| 7996        | CakSNP7996     | <i>Kabuli</i>    | <i>Ca_Kabuli_Chr05</i>       | 19828167                       | (A/C)       |
| 7997        | CakSNP7997     | <i>Kabuli</i>    | <i>Ca_Kabuli_Chr05</i>       | 19828226                       | (G/A)       |
| 7998        | CakSNP7998     | <i>Kabuli</i>    | <i>Ca_Kabuli_Chr05</i>       | 19828190                       | (T/C)       |
| 7999        | CakSNP7999     | <i>Kabuli</i>    | <i>Ca_Kabuli_Chr05</i>       | 19828184                       | (C/A)       |
| 8000        | CakSNP8000     | <i>Kabuli</i>    | <i>Ca_Kabuli_Chr05</i>       | 19828172                       | (T/G)       |
| 8001        | CakSNP8001     | <i>Kabuli</i>    | <i>Ca_Kabuli_Chr05</i>       | 19828144                       | (A/G)       |
| 8002        | CakSNP8002     | <i>Kabuli</i>    | <i>Ca_Kabuli_Chr05</i>       | 19884132                       | (C/T)       |
| 8003        | CakSNP8003     | <i>Kabuli</i>    | <i>Ca_Kabuli_Chr05</i>       | 19884124                       | (A/G)       |
| 8004        | CakSNP8004     | <i>Kabuli</i>    | <i>Ca_Kabuli_Chr05</i>       | 20008545                       | (C/T)       |
| 8005        | CakSNP8005     | <i>Kabuli</i>    | <i>Ca_Kabuli_Chr05</i>       | 20031711                       | (A/G)       |
| 8006        | CakSNP8006     | <i>Kabuli</i>    | <i>Ca_Kabuli_Chr05</i>       | 20354352                       | (T/C)       |
| 8007        | CakSNP8007     | <i>Kabuli</i>    | <i>Ca_Kabuli_Chr05</i>       | 20359674                       | (G/A)       |
| 8008        | CakSNP8008     | <i>Kabuli</i>    | <i>Ca_Kabuli_Chr05</i>       | 20460857                       | (G/A)       |
| 8009        | CakSNP8009     | <i>Kabuli</i>    | <i>Ca_Kabuli_Chr05</i>       | 20460859                       | (T/G)       |
| 8010        | CakSNP8010     | <i>Kabuli</i>    | <i>Ca_Kabuli_Chr05</i>       | 20546402                       | (T/C)       |
| 8011        | CakSNP8011     | <i>Kabuli</i>    | <i>Ca_Kabuli_Chr05</i>       | 20546385                       | (T/G)       |
| 8012        | CakSNP8012     | <i>Kabuli</i>    | <i>Ca_Kabuli_Chr05</i>       | 20644984                       | (C/A)       |
| 8013        | CakSNP8013     | <i>Kabuli</i>    | <i>Ca_Kabuli_Chr05</i>       | 20834519                       | (A/G)       |
| 8014        | CakSNP8014     | <i>Kabuli</i>    | <i>Ca_Kabuli_Chr05</i>       | 21163371                       | (G/A)       |
| 8015        | CakSNP8015     | <i>Kabuli</i>    | <i>Ca_Kabuli_Chr05</i>       | 21385948                       | (T/C)       |
| 8016        | CakSNP8016     | <i>Kabuli</i>    | <i>Ca_Kabuli_Chr05</i>       | 21495583                       | (C/A)       |
| 8017        | CakSNP8017     | <i>Kabuli</i>    | <i>Ca_Kabuli_Chr05</i>       | 21495631                       | (C/T)       |
| 8018        | CakSNP8018     | <i>Kabuli</i>    | <i>Ca_Kabuli_Chr05</i>       | 21495672                       | (G/A)       |
| 8019        | CakSNP8019     | <i>Kabuli</i>    | <i>Ca_Kabuli_Chr05</i>       | 21495707                       | (A/G)       |
| 8020        | CakSNP8020     | <i>Kabuli</i>    | <i>Ca_Kabuli_Chr05</i>       | 21495679                       | (G/A)       |
| 8021        | CakSNP8021     | <i>Kabuli</i>    | <i>Ca_Kabuli_Chr05</i>       | 21495674                       | (G/A)       |
| 8022        | CakSNP8022     | <i>Kabuli</i>    | <i>Ca_Kabuli_Chr05</i>       | 21769327                       | (G/A)       |
| 8023        | CakSNP8023     | <i>Kabuli</i>    | <i>Ca_Kabuli_Chr05</i>       | 21769419                       | (C/G)       |
| 8024        | CakSNP8024     | <i>Kabuli</i>    | <i>Ca_Kabuli_Chr05</i>       | 21769794                       | (A/C)       |
| 8025        | CakSNP8025     | <i>Kabuli</i>    | <i>Ca_Kabuli_Chr05</i>       | 22027215                       | (T/C)       |
| 8026        | CakSNP8026     | <i>Kabuli</i>    | <i>Ca_Kabuli_Chr05</i>       | 22027257                       | (G/T)       |
| 8027        | CakSNP8027     | <i>Kabuli</i>    | <i>Ca_Kabuli_Chr05</i>       | 22027265                       | (A/T)       |
| 8028        | CakSNP8028     | <i>Kabuli</i>    | <i>Ca_Kabuli_Chr05</i>       | 22029684                       | (C/A)       |
| 8029        | CakSNP8029     | <i>Kabuli</i>    | <i>Ca_Kabuli_Chr05</i>       | 22029686                       | (G/A)       |
| 8030        | CakSNP8030     | <i>Kabuli</i>    | <i>Ca_Kabuli_Chr05</i>       | 22029761                       | (C/T)       |
| 8031        | CakSNP8031     | <i>Kabuli</i>    | <i>Ca_Kabuli_Chr05</i>       | 22065518                       | (C/T)       |
| 8032        | CakSNP8032     | <i>Kabuli</i>    | <i>Ca_Kabuli_Chr05</i>       | 22065859                       | (G/A)       |

| <b>S.N.</b> | <b>SNP IDs</b> | <b>Cultivars</b> | <b>Chromosomes/scaffolds</b> | <b>Physical positions (bp)</b> | <b>SNPs</b> |
|-------------|----------------|------------------|------------------------------|--------------------------------|-------------|
| 8033        | CakSNP8033     | <i>Kabuli</i>    | <i>Ca_Kabuli_Chr05</i>       | 22066034                       | (A/T)       |
| 8034        | CakSNP8034     | <i>Kabuli</i>    | <i>Ca_Kabuli_Chr05</i>       | 22116961                       | (T/G)       |
| 8035        | CakSNP8035     | <i>Kabuli</i>    | <i>Ca_Kabuli_Chr05</i>       | 22188341                       | (C/T)       |
| 8036        | CakSNP8036     | <i>Kabuli</i>    | <i>Ca_Kabuli_Chr05</i>       | 22188318                       | (C/T)       |
| 8037        | CakSNP8037     | <i>Kabuli</i>    | <i>Ca_Kabuli_Chr05</i>       | 22296731                       | (G/A)       |
| 8038        | CakSNP8038     | <i>Kabuli</i>    | <i>Ca_Kabuli_Chr05</i>       | 22296728                       | (G/T)       |
| 8039        | CakSNP8039     | <i>Kabuli</i>    | <i>Ca_Kabuli_Chr05</i>       | 22302350                       | (A/C)       |
| 8040        | CakSNP8040     | <i>Kabuli</i>    | <i>Ca_Kabuli_Chr05</i>       | 22344868                       | (A/G)       |
| 8041        | CakSNP8041     | <i>Kabuli</i>    | <i>Ca_Kabuli_Chr05</i>       | 22445954                       | (T/C)       |
| 8042        | CakSNP8042     | <i>Kabuli</i>    | <i>Ca_Kabuli_Chr05</i>       | 22679380                       | (C/A)       |
| 8043        | CakSNP8043     | <i>Kabuli</i>    | <i>Ca_Kabuli_Chr05</i>       | 23039312                       | (C/T)       |
| 8044        | CakSNP8044     | <i>Kabuli</i>    | <i>Ca_Kabuli_Chr05</i>       | 23049683                       | (C/A)       |
| 8045        | CakSNP8045     | <i>Kabuli</i>    | <i>Ca_Kabuli_Chr05</i>       | 23157899                       | (A/G)       |
| 8046        | CakSNP8046     | <i>Kabuli</i>    | <i>Ca_Kabuli_Chr05</i>       | 23161492                       | (A/T)       |
| 8047        | CakSNP8047     | <i>Kabuli</i>    | <i>Ca_Kabuli_Chr05</i>       | 23261964                       | (A/G)       |
| 8048        | CakSNP8048     | <i>Kabuli</i>    | <i>Ca_Kabuli_Chr05</i>       | 23262114                       | (C/A)       |
| 8049        | CakSNP8049     | <i>Kabuli</i>    | <i>Ca_Kabuli_Chr05</i>       | 23262264                       | (C/A)       |
| 8050        | CakSNP8050     | <i>Kabuli</i>    | <i>Ca_Kabuli_Chr05</i>       | 23323538                       | (G/A)       |
| 8051        | CakSNP8051     | <i>Kabuli</i>    | <i>Ca_Kabuli_Chr05</i>       | 23323520                       | (C/A)       |
| 8052        | CakSNP8052     | <i>Kabuli</i>    | <i>Ca_Kabuli_Chr05</i>       | 23323514                       | (C/A)       |
| 8053        | CakSNP8053     | <i>Kabuli</i>    | <i>Ca_Kabuli_Chr05</i>       | 23323479                       | (A/T)       |
| 8054        | CakSNP8054     | <i>Kabuli</i>    | <i>Ca_Kabuli_Chr05</i>       | 23323478                       | (A/T)       |
| 8055        | CakSNP8055     | <i>Kabuli</i>    | <i>Ca_Kabuli_Chr05</i>       | 23440293                       | (C/T)       |
| 8056        | CakSNP8056     | <i>Kabuli</i>    | <i>Ca_Kabuli_Chr05</i>       | 23449048                       | (T/C)       |
| 8057        | CakSNP8057     | <i>Kabuli</i>    | <i>Ca_Kabuli_Chr05</i>       | 23449134                       | (A/C)       |
| 8058        | CakSNP8058     | <i>Kabuli</i>    | <i>Ca_Kabuli_Chr05</i>       | 23449127                       | (C/A)       |
| 8059        | CakSNP8059     | <i>Kabuli</i>    | <i>Ca_Kabuli_Chr05</i>       | 23562595                       | (G/A)       |
| 8060        | CakSNP8060     | <i>Kabuli</i>    | <i>Ca_Kabuli_Chr05</i>       | 23562827                       | (G/A)       |
| 8061        | CakSNP8061     | <i>Kabuli</i>    | <i>Ca_Kabuli_Chr05</i>       | 23674814                       | (C/G)       |
| 8062        | CakSNP8062     | <i>Kabuli</i>    | <i>Ca_Kabuli_Chr05</i>       | 23674815                       | (C/T)       |
| 8063        | CakSNP8063     | <i>Kabuli</i>    | <i>Ca_Kabuli_Chr05</i>       | 23674845                       | (G/C)       |
| 8064        | CakSNP8064     | <i>Kabuli</i>    | <i>Ca_Kabuli_Chr05</i>       | 23783140                       | (T/C)       |
| 8065        | CakSNP8065     | <i>Kabuli</i>    | <i>Ca_Kabuli_Chr05</i>       | 23783156                       | (C/A)       |
| 8066        | CakSNP8066     | <i>Kabuli</i>    | <i>Ca_Kabuli_Chr05</i>       | 23783157                       | (G/C)       |
| 8067        | CakSNP8067     | <i>Kabuli</i>    | <i>Ca_Kabuli_Chr05</i>       | 23783188                       | (G/A)       |
| 8068        | CakSNP8068     | <i>Kabuli</i>    | <i>Ca_Kabuli_Chr05</i>       | 23783195                       | (C/G)       |
| 8069        | CakSNP8069     | <i>Kabuli</i>    | <i>Ca_Kabuli_Chr05</i>       | 23783254                       | (A/G)       |
| 8070        | CakSNP8070     | <i>Kabuli</i>    | <i>Ca_Kabuli_Chr05</i>       | 23783252                       | (T/A)       |
| 8071        | CakSNP8071     | <i>Kabuli</i>    | <i>Ca_Kabuli_Chr05</i>       | 23884909                       | (C/T)       |



| <b>S.N.</b> | <b>SNP IDs</b> | <b>Cultivars</b> | <b>Chromosomes/scaffolds</b> | <b>Physical positions (bp)</b> | <b>SNPs</b> |
|-------------|----------------|------------------|------------------------------|--------------------------------|-------------|
| 8072        | CakSNP8072     | <i>Kabuli</i>    | <i>Ca_Kabuli_Chr05</i>       | 23884936                       | (G/A)       |
| 8073        | CakSNP8073     | <i>Kabuli</i>    | <i>Ca_Kabuli_Chr05</i>       | 23930933                       | (C/T)       |
| 8074        | CakSNP8074     | <i>Kabuli</i>    | <i>Ca_Kabuli_Chr05</i>       | 23930988                       | (G/A)       |
| 8075        | CakSNP8075     | <i>Kabuli</i>    | <i>Ca_Kabuli_Chr05</i>       | 23932354                       | (C/T)       |
| 8076        | CakSNP8076     | <i>Kabuli</i>    | <i>Ca_Kabuli_Chr05</i>       | 23934198                       | (G/T)       |
| 8077        | CakSNP8077     | <i>Kabuli</i>    | <i>Ca_Kabuli_Chr05</i>       | 24059182                       | (C/G)       |
| 8078        | CakSNP8078     | <i>Kabuli</i>    | <i>Ca_Kabuli_Chr05</i>       | 24090533                       | (C/T)       |
| 8079        | CakSNP8079     | <i>Kabuli</i>    | <i>Ca_Kabuli_Chr05</i>       | 24090523                       | (A/C)       |
| 8080        | CakSNP8080     | <i>Kabuli</i>    | <i>Ca_Kabuli_Chr05</i>       | 24090515                       | (A/C)       |
| 8081        | CakSNP8081     | <i>Kabuli</i>    | <i>Ca_Kabuli_Chr05</i>       | 24090749                       | (A/C)       |
| 8082        | CakSNP8082     | <i>Kabuli</i>    | <i>Ca_Kabuli_Chr05</i>       | 24097823                       | (T/C)       |
| 8083        | CakSNP8083     | <i>Kabuli</i>    | <i>Ca_Kabuli_Chr05</i>       | 24153061                       | (G/C)       |
| 8084        | CakSNP8084     | <i>Kabuli</i>    | <i>Ca_Kabuli_Chr05</i>       | 24153205                       | (T/C)       |
| 8085        | CakSNP8085     | <i>Kabuli</i>    | <i>Ca_Kabuli_Chr05</i>       | 24153273                       | (T/C)       |
| 8086        | CakSNP8086     | <i>Kabuli</i>    | <i>Ca_Kabuli_Chr05</i>       | 24153202                       | (A/C)       |
| 8087        | CakSNP8087     | <i>Kabuli</i>    | <i>Ca_Kabuli_Chr05</i>       | 24153199                       | (C/T)       |
| 8088        | CakSNP8088     | <i>Kabuli</i>    | <i>Ca_Kabuli_Chr05</i>       | 24166103                       | (C/T)       |
| 8089        | CakSNP8089     | <i>Kabuli</i>    | <i>Ca_Kabuli_Chr05</i>       | 24166095                       | (G/A)       |
| 8090        | CakSNP8090     | <i>Kabuli</i>    | <i>Ca_Kabuli_Chr05</i>       | 24166093                       | (A/G)       |
| 8091        | CakSNP8091     | <i>Kabuli</i>    | <i>Ca_Kabuli_Chr05</i>       | 24166046                       | (G/A)       |
| 8092        | CakSNP8092     | <i>Kabuli</i>    | <i>Ca_Kabuli_Chr05</i>       | 24166047                       | (C/T)       |
| 8093        | CakSNP8093     | <i>Kabuli</i>    | <i>Ca_Kabuli_Chr05</i>       | 24166082                       | (G/A)       |
| 8094        | CakSNP8094     | <i>Kabuli</i>    | <i>Ca_Kabuli_Chr05</i>       | 24181232                       | (C/A)       |
| 8095        | CakSNP8095     | <i>Kabuli</i>    | <i>Ca_Kabuli_Chr05</i>       | 24181228                       | (C/A)       |
| 8096        | CakSNP8096     | <i>Kabuli</i>    | <i>Ca_Kabuli_Chr05</i>       | 24245312                       | (C/A)       |
| 8097        | CakSNP8097     | <i>Kabuli</i>    | <i>Ca_Kabuli_Chr05</i>       | 24245308                       | (C/A)       |
| 8098        | CakSNP8098     | <i>Kabuli</i>    | <i>Ca_Kabuli_Chr05</i>       | 24346350                       | (A/T)       |
| 8099        | CakSNP8099     | <i>Kabuli</i>    | <i>Ca_Kabuli_Chr05</i>       | 24576960                       | (C/T)       |
| 8100        | CakSNP8100     | <i>Kabuli</i>    | <i>Ca_Kabuli_Chr05</i>       | 24576970                       | (A/G)       |
| 8101        | CakSNP8101     | <i>Kabuli</i>    | <i>Ca_Kabuli_Chr05</i>       | 24576993                       | (T/G)       |
| 8102        | CakSNP8102     | <i>Kabuli</i>    | <i>Ca_Kabuli_Chr05</i>       | 24596227                       | (T/C)       |
| 8103        | CakSNP8103     | <i>Kabuli</i>    | <i>Ca_Kabuli_Chr05</i>       | 24596257                       | (C/T)       |
| 8104        | CakSNP8104     | <i>Kabuli</i>    | <i>Ca_Kabuli_Chr05</i>       | 24596269                       | (G/A)       |
| 8105        | CakSNP8105     | <i>Kabuli</i>    | <i>Ca_Kabuli_Chr05</i>       | 24605438                       | (A/C)       |
| 8106        | CakSNP8106     | <i>Kabuli</i>    | <i>Ca_Kabuli_Chr05</i>       | 24843015                       | (G/T)       |
| 8107        | CakSNP8107     | <i>Kabuli</i>    | <i>Ca_Kabuli_Chr05</i>       | 25003171                       | (C/T)       |
| 8108        | CakSNP8108     | <i>Kabuli</i>    | <i>Ca_Kabuli_Chr05</i>       | 25006110                       | (A/C)       |
| 8109        | CakSNP8109     | <i>Kabuli</i>    | <i>Ca_Kabuli_Chr05</i>       | 25006123                       | (C/T)       |
| 8110        | CakSNP8110     | <i>Kabuli</i>    | <i>Ca_Kabuli_Chr05</i>       | 25184089                       | (T/C)       |

| <b>S.N.</b> | <b>SNP IDs</b> | <b>Cultivars</b> | <b>Chromosomes/scaffolds</b> | <b>Physical positions (bp)</b> | <b>SNPs</b> |
|-------------|----------------|------------------|------------------------------|--------------------------------|-------------|
| 8111        | CakSNP8111     | <i>Kabuli</i>    | <i>Ca_Kabuli_Chr05</i>       | 25184133                       | (G/A)       |
| 8112        | CakSNP8112     | <i>Kabuli</i>    | <i>Ca_Kabuli_Chr05</i>       | 25399115                       | (T/G)       |
| 8113        | CakSNP8113     | <i>Kabuli</i>    | <i>Ca_Kabuli_Chr05</i>       | 25400604                       | (A/G)       |
| 8114        | CakSNP8114     | <i>Kabuli</i>    | <i>Ca_Kabuli_Chr05</i>       | 25474110                       | (A/C)       |
| 8115        | CakSNP8115     | <i>Kabuli</i>    | <i>Ca_Kabuli_Chr05</i>       | 25474105                       | (C/T)       |
| 8116        | CakSNP8116     | <i>Kabuli</i>    | <i>Ca_Kabuli_Chr05</i>       | 25474093                       | (G/C)       |
| 8117        | CakSNP8117     | <i>Kabuli</i>    | <i>Ca_Kabuli_Chr05</i>       | 25474089                       | (C/A)       |
| 8118        | CakSNP8118     | <i>Kabuli</i>    | <i>Ca_Kabuli_Chr05</i>       | 25597077                       | (A/G)       |
| 8119        | CakSNP8119     | <i>Kabuli</i>    | <i>Ca_Kabuli_Chr05</i>       | 25678975                       | (G/T)       |
| 8120        | CakSNP8120     | <i>Kabuli</i>    | <i>Ca_Kabuli_Chr05</i>       | 25697487                       | (C/G)       |
| 8121        | CakSNP8121     | <i>Kabuli</i>    | <i>Ca_Kabuli_Chr05</i>       | 25805020                       | (A/G)       |
| 8122        | CakSNP8122     | <i>Kabuli</i>    | <i>Ca_Kabuli_Chr05</i>       | 26025243                       | (C/T)       |
| 8123        | CakSNP8123     | <i>Kabuli</i>    | <i>Ca_Kabuli_Chr05</i>       | 26025282                       | (A/G)       |
| 8124        | CakSNP8124     | <i>Kabuli</i>    | <i>Ca_Kabuli_Chr05</i>       | 26025356                       | (A/T)       |
| 8125        | CakSNP8125     | <i>Kabuli</i>    | <i>Ca_Kabuli_Chr05</i>       | 26027313                       | (C/A)       |
| 8126        | CakSNP8126     | <i>Kabuli</i>    | <i>Ca_Kabuli_Chr05</i>       | 26095084                       | (T/G)       |
| 8127        | CakSNP8127     | <i>Kabuli</i>    | <i>Ca_Kabuli_Chr05</i>       | 26124240                       | (T/C)       |
| 8128        | CakSNP8128     | <i>Kabuli</i>    | <i>Ca_Kabuli_Chr05</i>       | 26191896                       | (T/C)       |
| 8129        | CakSNP8129     | <i>Kabuli</i>    | <i>Ca_Kabuli_Chr05</i>       | 26194579                       | (A/G)       |
| 8130        | CakSNP8130     | <i>Kabuli</i>    | <i>Ca_Kabuli_Chr05</i>       | 26238764                       | (T/G)       |
| 8131        | CakSNP8131     | <i>Kabuli</i>    | <i>Ca_Kabuli_Chr05</i>       | 26238752                       | (A/T)       |
| 8132        | CakSNP8132     | <i>Kabuli</i>    | <i>Ca_Kabuli_Chr05</i>       | 26238748                       | (A/T)       |
| 8133        | CakSNP8133     | <i>Kabuli</i>    | <i>Ca_Kabuli_Chr05</i>       | 26238741                       | (G/T)       |
| 8134        | CakSNP8134     | <i>Kabuli</i>    | <i>Ca_Kabuli_Chr05</i>       | 26238739                       | (C/T)       |
| 8135        | CakSNP8135     | <i>Kabuli</i>    | <i>Ca_Kabuli_Chr05</i>       | 26384636                       | (C/G)       |
| 8136        | CakSNP8136     | <i>Kabuli</i>    | <i>Ca_Kabuli_Chr05</i>       | 26467869                       | (A/C)       |
| 8137        | CakSNP8137     | <i>Kabuli</i>    | <i>Ca_Kabuli_Chr05</i>       | 26474910                       | (A/C)       |
| 8138        | CakSNP8138     | <i>Kabuli</i>    | <i>Ca_Kabuli_Chr05</i>       | 26475067                       | (T/C)       |
| 8139        | CakSNP8139     | <i>Kabuli</i>    | <i>Ca_Kabuli_Chr05</i>       | 26477751                       | (A/T)       |
| 8140        | CakSNP8140     | <i>Kabuli</i>    | <i>Ca_Kabuli_Chr05</i>       | 26494631                       | (A/G)       |
| 8141        | CakSNP8141     | <i>Kabuli</i>    | <i>Ca_Kabuli_Chr05</i>       | 26494778                       | (T/C)       |
| 8142        | CakSNP8142     | <i>Kabuli</i>    | <i>Ca_Kabuli_Chr05</i>       | 26494769                       | (T/C)       |
| 8143        | CakSNP8143     | <i>Kabuli</i>    | <i>Ca_Kabuli_Chr05</i>       | 26496197                       | (A/G)       |
| 8144        | CakSNP8144     | <i>Kabuli</i>    | <i>Ca_Kabuli_Chr05</i>       | 26558406                       | (A/G)       |
| 8145        | CakSNP8145     | <i>Kabuli</i>    | <i>Ca_Kabuli_Chr05</i>       | 26558366                       | (A/G)       |
| 8146        | CakSNP8146     | <i>Kabuli</i>    | <i>Ca_Kabuli_Chr05</i>       | 26558363                       | (C/G)       |
| 8147        | CakSNP8147     | <i>Kabuli</i>    | <i>Ca_Kabuli_Chr05</i>       | 26558357                       | (G/A)       |
| 8148        | CakSNP8148     | <i>Kabuli</i>    | <i>Ca_Kabuli_Chr05</i>       | 26558356                       | (G/T)       |
| 8149        | CakSNP8149     | <i>Kabuli</i>    | <i>Ca_Kabuli_Chr05</i>       | 26569400                       | (G/C)       |

| <b>S.N.</b> | <b>SNP IDs</b> | <b>Cultivars</b> | <b>Chromosomes/scaffolds</b> | <b>Physical positions (bp)</b> | <b>SNPs</b> |
|-------------|----------------|------------------|------------------------------|--------------------------------|-------------|
| 8150        | CakSNP8150     | <i>Kabuli</i>    | <i>Ca_Kabuli_Chr05</i>       | 26609014                       | (T/C)       |
| 8151        | CakSNP8151     | <i>Kabuli</i>    | <i>Ca_Kabuli_Chr05</i>       | 26608993                       | (A/G)       |
| 8152        | CakSNP8152     | <i>Kabuli</i>    | <i>Ca_Kabuli_Chr05</i>       | 26621093                       | (C/G)       |
| 8153        | CakSNP8153     | <i>Kabuli</i>    | <i>Ca_Kabuli_Chr05</i>       | 26626861                       | (A/G)       |
| 8154        | CakSNP8154     | <i>Kabuli</i>    | <i>Ca_Kabuli_Chr05</i>       | 26626855                       | (T/G)       |
| 8155        | CakSNP8155     | <i>Kabuli</i>    | <i>Ca_Kabuli_Chr05</i>       | 26638041                       | (G/A)       |
| 8156        | CakSNP8156     | <i>Kabuli</i>    | <i>Ca_Kabuli_Chr05</i>       | 26638042                       | (C/T)       |
| 8157        | CakSNP8157     | <i>Kabuli</i>    | <i>Ca_Kabuli_Chr05</i>       | 26638080                       | (A/G)       |
| 8158        | CakSNP8158     | <i>Kabuli</i>    | <i>Ca_Kabuli_Chr05</i>       | 26638126                       | (C/T)       |
| 8159        | CakSNP8159     | <i>Kabuli</i>    | <i>Ca_Kabuli_Chr05</i>       | 26638118                       | (C/T)       |
| 8160        | CakSNP8160     | <i>Kabuli</i>    | <i>Ca_Kabuli_Chr05</i>       | 26679836                       | (C/T)       |
| 8161        | CakSNP8161     | <i>Kabuli</i>    | <i>Ca_Kabuli_Chr05</i>       | 26696390                       | (G/A)       |
| 8162        | CakSNP8162     | <i>Kabuli</i>    | <i>Ca_Kabuli_Chr05</i>       | 26696412                       | (C/A)       |
| 8163        | CakSNP8163     | <i>Kabuli</i>    | <i>Ca_Kabuli_Chr05</i>       | 26696455                       | (G/A)       |
| 8164        | CakSNP8164     | <i>Kabuli</i>    | <i>Ca_Kabuli_Chr05</i>       | 26696547                       | (C/T)       |
| 8165        | CakSNP8165     | <i>Kabuli</i>    | <i>Ca_Kabuli_Chr05</i>       | 26696533                       | (C/T)       |
| 8166        | CakSNP8166     | <i>Kabuli</i>    | <i>Ca_Kabuli_Chr05</i>       | 26696494                       | (G/A)       |
| 8167        | CakSNP8167     | <i>Kabuli</i>    | <i>Ca_Kabuli_Chr05</i>       | 26696578                       | (G/A)       |
| 8168        | CakSNP8168     | <i>Kabuli</i>    | <i>Ca_Kabuli_Chr05</i>       | 26696602                       | (C/T)       |
| 8169        | CakSNP8169     | <i>Kabuli</i>    | <i>Ca_Kabuli_Chr05</i>       | 26696620                       | (C/T)       |
| 8170        | CakSNP8170     | <i>Kabuli</i>    | <i>Ca_Kabuli_Chr05</i>       | 26696624                       | (G/A)       |
| 8171        | CakSNP8171     | <i>Kabuli</i>    | <i>Ca_Kabuli_Chr05</i>       | 26785140                       | (G/A)       |
| 8172        | CakSNP8172     | <i>Kabuli</i>    | <i>Ca_Kabuli_Chr05</i>       | 26785226                       | (C/A)       |
| 8173        | CakSNP8173     | <i>Kabuli</i>    | <i>Ca_Kabuli_Chr05</i>       | 26997335                       | (T/G)       |
| 8174        | CakSNP8174     | <i>Kabuli</i>    | <i>Ca_Kabuli_Chr05</i>       | 26999793                       | (C/T)       |
| 8175        | CakSNP8175     | <i>Kabuli</i>    | <i>Ca_Kabuli_Chr05</i>       | 27000127                       | (C/G)       |
| 8176        | CakSNP8176     | <i>Kabuli</i>    | <i>Ca_Kabuli_Chr05</i>       | 27000104                       | (C/A)       |
| 8177        | CakSNP8177     | <i>Kabuli</i>    | <i>Ca_Kabuli_Chr05</i>       | 27000278                       | (T/A)       |
| 8178        | CakSNP8178     | <i>Kabuli</i>    | <i>Ca_Kabuli_Chr05</i>       | 27000280                       | (T/G)       |
| 8179        | CakSNP8179     | <i>Kabuli</i>    | <i>Ca_Kabuli_Chr05</i>       | 27025766                       | (A/G)       |
| 8180        | CakSNP8180     | <i>Kabuli</i>    | <i>Ca_Kabuli_Chr05</i>       | 27025752                       | (A/C)       |
| 8181        | CakSNP8181     | <i>Kabuli</i>    | <i>Ca_Kabuli_Chr05</i>       | 27042679                       | (G/A)       |
| 8182        | CakSNP8182     | <i>Kabuli</i>    | <i>Ca_Kabuli_Chr05</i>       | 27117953                       | (A/G)       |
| 8183        | CakSNP8183     | <i>Kabuli</i>    | <i>Ca_Kabuli_Chr05</i>       | 27150550                       | (A/G)       |
| 8184        | CakSNP8184     | <i>Kabuli</i>    | <i>Ca_Kabuli_Chr05</i>       | 27230515                       | (T/A)       |
| 8185        | CakSNP8185     | <i>Kabuli</i>    | <i>Ca_Kabuli_Chr05</i>       | 27230514                       | (A/G)       |
| 8186        | CakSNP8186     | <i>Kabuli</i>    | <i>Ca_Kabuli_Chr05</i>       | 27231394                       | (T/C)       |
| 8187        | CakSNP8187     | <i>Kabuli</i>    | <i>Ca_Kabuli_Chr05</i>       | 27231641                       | (T/A)       |
| 8188        | CakSNP8188     | <i>Kabuli</i>    | <i>Ca_Kabuli_Chr05</i>       | 27232304                       | (T/A)       |

| <b>S.N.</b> | <b>SNP IDs</b> | <b>Cultivars</b> | <b>Chromosomes/scaffolds</b> | <b>Physical positions (bp)</b> | <b>SNPs</b> |
|-------------|----------------|------------------|------------------------------|--------------------------------|-------------|
| 8189        | CakSNP8189     | <i>Kabuli</i>    | <i>Ca_Kabuli_Chr05</i>       | 27234806                       | (G/A)       |
| 8190        | CakSNP8190     | <i>Kabuli</i>    | <i>Ca_Kabuli_Chr05</i>       | 27235002                       | (T/G)       |
| 8191        | CakSNP8191     | <i>Kabuli</i>    | <i>Ca_Kabuli_Chr05</i>       | 27328552                       | (G/A)       |
| 8192        | CakSNP8192     | <i>Kabuli</i>    | <i>Ca_Kabuli_Chr05</i>       | 27328737                       | (G/T)       |
| 8193        | CakSNP8193     | <i>Kabuli</i>    | <i>Ca_Kabuli_Chr05</i>       | 27334056                       | (A/C)       |
| 8194        | CakSNP8194     | <i>Kabuli</i>    | <i>Ca_Kabuli_Chr05</i>       | 27334057                       | (G/C)       |
| 8195        | CakSNP8195     | <i>Kabuli</i>    | <i>Ca_Kabuli_Chr05</i>       | 27334061                       | (G/C)       |
| 8196        | CakSNP8196     | <i>Kabuli</i>    | <i>Ca_Kabuli_Chr05</i>       | 27349210                       | (T/A)       |
| 8197        | CakSNP8197     | <i>Kabuli</i>    | <i>Ca_Kabuli_Chr05</i>       | 27349237                       | (C/T)       |
| 8198        | CakSNP8198     | <i>Kabuli</i>    | <i>Ca_Kabuli_Chr05</i>       | 27361515                       | (C/T)       |
| 8199        | CakSNP8199     | <i>Kabuli</i>    | <i>Ca_Kabuli_Chr05</i>       | 27361579                       | (T/G)       |
| 8200        | CakSNP8200     | <i>Kabuli</i>    | <i>Ca_Kabuli_Chr05</i>       | 27362517                       | (C/G)       |
| 8201        | CakSNP8201     | <i>Kabuli</i>    | <i>Ca_Kabuli_Chr05</i>       | 27362570                       | (G/T)       |
| 8202        | CakSNP8202     | <i>Kabuli</i>    | <i>Ca_Kabuli_Chr05</i>       | 27362573                       | (A/G)       |
| 8203        | CakSNP8203     | <i>Kabuli</i>    | <i>Ca_Kabuli_Chr05</i>       | 27362584                       | (T/G)       |
| 8204        | CakSNP8204     | <i>Kabuli</i>    | <i>Ca_Kabuli_Chr05</i>       | 27452484                       | (C/G)       |
| 8205        | CakSNP8205     | <i>Kabuli</i>    | <i>Ca_Kabuli_Chr05</i>       | 27516054                       | (T/A)       |
| 8206        | CakSNP8206     | <i>Kabuli</i>    | <i>Ca_Kabuli_Chr05</i>       | 27552106                       | (A/C)       |
| 8207        | CakSNP8207     | <i>Kabuli</i>    | <i>Ca_Kabuli_Chr05</i>       | 27555637                       | (T/G)       |
| 8208        | CakSNP8208     | <i>Kabuli</i>    | <i>Ca_Kabuli_Chr05</i>       | 27568101                       | (T/G)       |
| 8209        | CakSNP8209     | <i>Kabuli</i>    | <i>Ca_Kabuli_Chr05</i>       | 27568095                       | (C/A)       |
| 8210        | CakSNP8210     | <i>Kabuli</i>    | <i>Ca_Kabuli_Chr05</i>       | 27568064                       | (A/C)       |
| 8211        | CakSNP8211     | <i>Kabuli</i>    | <i>Ca_Kabuli_Chr05</i>       | 27568059                       | (C/T)       |
| 8212        | CakSNP8212     | <i>Kabuli</i>    | <i>Ca_Kabuli_Chr05</i>       | 27568028                       | (A/T)       |
| 8213        | CakSNP8213     | <i>Kabuli</i>    | <i>Ca_Kabuli_Chr05</i>       | 27568033                       | (G/A)       |
| 8214        | CakSNP8214     | <i>Kabuli</i>    | <i>Ca_Kabuli_Chr05</i>       | 27568082                       | (G/A)       |
| 8215        | CakSNP8215     | <i>Kabuli</i>    | <i>Ca_Kabuli_Chr05</i>       | 27568097                       | (G/A)       |
| 8216        | CakSNP8216     | <i>Kabuli</i>    | <i>Ca_Kabuli_Chr05</i>       | 27568098                       | (C/T)       |
| 8217        | CakSNP8217     | <i>Kabuli</i>    | <i>Ca_Kabuli_Chr05</i>       | 27568118                       | (A/G)       |
| 8218        | CakSNP8218     | <i>Kabuli</i>    | <i>Ca_Kabuli_Chr05</i>       | 27568133                       | (G/T)       |
| 8219        | CakSNP8219     | <i>Kabuli</i>    | <i>Ca_Kabuli_Chr05</i>       | 27568081                       | (G/C)       |
| 8220        | CakSNP8220     | <i>Kabuli</i>    | <i>Ca_Kabuli_Chr05</i>       | 27568107                       | (C/G)       |
| 8221        | CakSNP8221     | <i>Kabuli</i>    | <i>Ca_Kabuli_Chr05</i>       | 27568156                       | (C/G)       |
| 8222        | CakSNP8222     | <i>Kabuli</i>    | <i>Ca_Kabuli_Chr05</i>       | 27568141                       | (C/T)       |
| 8223        | CakSNP8223     | <i>Kabuli</i>    | <i>Ca_Kabuli_Chr05</i>       | 27568180                       | (C/T)       |
| 8224        | CakSNP8224     | <i>Kabuli</i>    | <i>Ca_Kabuli_Chr05</i>       | 27568176                       | (T/C)       |
| 8225        | CakSNP8225     | <i>Kabuli</i>    | <i>Ca_Kabuli_Chr05</i>       | 27579347                       | (C/T)       |
| 8226        | CakSNP8226     | <i>Kabuli</i>    | <i>Ca_Kabuli_Chr05</i>       | 27605037                       | (A/T)       |
| 8227        | CakSNP8227     | <i>Kabuli</i>    | <i>Ca_Kabuli_Chr05</i>       | 27605063                       | (T/A)       |

| <b>S.N.</b> | <b>SNP IDs</b> | <b>Cultivars</b> | <b>Chromosomes/scaffolds</b> | <b>Physical positions (bp)</b> | <b>SNPs</b> |
|-------------|----------------|------------------|------------------------------|--------------------------------|-------------|
| 8228        | CakSNP8228     | <i>Kabuli</i>    | <i>Ca_Kabuli_Chr05</i>       | 27605081                       | (C/T)       |
| 8229        | CakSNP8229     | <i>Kabuli</i>    | <i>Ca_Kabuli_Chr05</i>       | 27605095                       | (G/C)       |
| 8230        | CakSNP8230     | <i>Kabuli</i>    | <i>Ca_Kabuli_Chr05</i>       | 27692816                       | (C/T)       |
| 8231        | CakSNP8231     | <i>Kabuli</i>    | <i>Ca_Kabuli_Chr05</i>       | 27692818                       | (C/T)       |
| 8232        | CakSNP8232     | <i>Kabuli</i>    | <i>Ca_Kabuli_Chr05</i>       | 27692822                       | (C/T)       |
| 8233        | CakSNP8233     | <i>Kabuli</i>    | <i>Ca_Kabuli_Chr05</i>       | 27692823                       | (A/T)       |
| 8234        | CakSNP8234     | <i>Kabuli</i>    | <i>Ca_Kabuli_Chr05</i>       | 27692831                       | (A/T)       |
| 8235        | CakSNP8235     | <i>Kabuli</i>    | <i>Ca_Kabuli_Chr05</i>       | 27694205                       | (C/A)       |
| 8236        | CakSNP8236     | <i>Kabuli</i>    | <i>Ca_Kabuli_Chr05</i>       | 27750155                       | (C/T)       |
| 8237        | CakSNP8237     | <i>Kabuli</i>    | <i>Ca_Kabuli_Chr05</i>       | 27786025                       | (T/C)       |
| 8238        | CakSNP8238     | <i>Kabuli</i>    | <i>Ca_Kabuli_Chr05</i>       | 27838003                       | (T/C)       |
| 8239        | CakSNP8239     | <i>Kabuli</i>    | <i>Ca_Kabuli_Chr05</i>       | 27850760                       | (T/C)       |
| 8240        | CakSNP8240     | <i>Kabuli</i>    | <i>Ca_Kabuli_Chr05</i>       | 27850735                       | (C/A)       |
| 8241        | CakSNP8241     | <i>Kabuli</i>    | <i>Ca_Kabuli_Chr05</i>       | 27853444                       | (C/T)       |
| 8242        | CakSNP8242     | <i>Kabuli</i>    | <i>Ca_Kabuli_Chr05</i>       | 27872968                       | (C/T)       |
| 8243        | CakSNP8243     | <i>Kabuli</i>    | <i>Ca_Kabuli_Chr05</i>       | 27873001                       | (T/C)       |
| 8244        | CakSNP8244     | <i>Kabuli</i>    | <i>Ca_Kabuli_Chr05</i>       | 27874414                       | (C/A)       |
| 8245        | CakSNP8245     | <i>Kabuli</i>    | <i>Ca_Kabuli_Chr05</i>       | 27936521                       | (A/G)       |
| 8246        | CakSNP8246     | <i>Kabuli</i>    | <i>Ca_Kabuli_Chr05</i>       | 27936524                       | (C/T)       |
| 8247        | CakSNP8247     | <i>Kabuli</i>    | <i>Ca_Kabuli_Chr05</i>       | 27939162                       | (G/A)       |
| 8248        | CakSNP8248     | <i>Kabuli</i>    | <i>Ca_Kabuli_Chr05</i>       | 27939135                       | (G/C)       |
| 8249        | CakSNP8249     | <i>Kabuli</i>    | <i>Ca_Kabuli_Chr05</i>       | 27939134                       | (A/T)       |
| 8250        | CakSNP8250     | <i>Kabuli</i>    | <i>Ca_Kabuli_Chr05</i>       | 27939128                       | (A/G)       |
| 8251        | CakSNP8251     | <i>Kabuli</i>    | <i>Ca_Kabuli_Chr05</i>       | 27974691                       | (G/T)       |
| 8252        | CakSNP8252     | <i>Kabuli</i>    | <i>Ca_Kabuli_Chr05</i>       | 28016628                       | (C/T)       |
| 8253        | CakSNP8253     | <i>Kabuli</i>    | <i>Ca_Kabuli_Chr05</i>       | 28016669                       | (A/G)       |
| 8254        | CakSNP8254     | <i>Kabuli</i>    | <i>Ca_Kabuli_Chr05</i>       | 28071467                       | (A/G)       |
| 8255        | CakSNP8255     | <i>Kabuli</i>    | <i>Ca_Kabuli_Chr05</i>       | 28116818                       | (A/G)       |
| 8256        | CakSNP8256     | <i>Kabuli</i>    | <i>Ca_Kabuli_Chr05</i>       | 28116988                       | (A/T)       |
| 8257        | CakSNP8257     | <i>Kabuli</i>    | <i>Ca_Kabuli_Chr05</i>       | 28117011                       | (C/T)       |
| 8258        | CakSNP8258     | <i>Kabuli</i>    | <i>Ca_Kabuli_Chr05</i>       | 28164985                       | (G/C)       |
| 8259        | CakSNP8259     | <i>Kabuli</i>    | <i>Ca_Kabuli_Chr05</i>       | 28168910                       | (A/G)       |
| 8260        | CakSNP8260     | <i>Kabuli</i>    | <i>Ca_Kabuli_Chr05</i>       | 28169475                       | (T/C)       |
| 8261        | CakSNP8261     | <i>Kabuli</i>    | <i>Ca_Kabuli_Chr05</i>       | 28175039                       | (A/G)       |
| 8262        | CakSNP8262     | <i>Kabuli</i>    | <i>Ca_Kabuli_Chr05</i>       | 28266046                       | (T/G)       |
| 8263        | CakSNP8263     | <i>Kabuli</i>    | <i>Ca_Kabuli_Chr05</i>       | 28271638                       | (G/C)       |
| 8264        | CakSNP8264     | <i>Kabuli</i>    | <i>Ca_Kabuli_Chr05</i>       | 28271732                       | (C/T)       |
| 8265        | CakSNP8265     | <i>Kabuli</i>    | <i>Ca_Kabuli_Chr05</i>       | 28271733                       | (G/A)       |
| 8266        | CakSNP8266     | <i>Kabuli</i>    | <i>Ca_Kabuli_Chr05</i>       | 28271742                       | (G/A)       |

| <b>S.N.</b> | <b>SNP IDs</b> | <b>Cultivars</b> | <b>Chromosomes/scaffolds</b> | <b>Physical positions (bp)</b> | <b>SNPs</b> |
|-------------|----------------|------------------|------------------------------|--------------------------------|-------------|
| 8267        | CakSNP8267     | <i>Kabuli</i>    | <i>Ca_Kabuli_Chr05</i>       | 28271767                       | (G/C)       |
| 8268        | CakSNP8268     | <i>Kabuli</i>    | <i>Ca_Kabuli_Chr05</i>       | 28284640                       | (T/C)       |
| 8269        | CakSNP8269     | <i>Kabuli</i>    | <i>Ca_Kabuli_Chr05</i>       | 28327832                       | (T/G)       |
| 8270        | CakSNP8270     | <i>Kabuli</i>    | <i>Ca_Kabuli_Chr05</i>       | 28327883                       | (G/A)       |
| 8271        | CakSNP8271     | <i>Kabuli</i>    | <i>Ca_Kabuli_Chr05</i>       | 28327870                       | (T/C)       |
| 8272        | CakSNP8272     | <i>Kabuli</i>    | <i>Ca_Kabuli_Chr05</i>       | 28327868                       | (G/A)       |
| 8273        | CakSNP8273     | <i>Kabuli</i>    | <i>Ca_Kabuli_Chr05</i>       | 28327856                       | (T/C)       |
| 8274        | CakSNP8274     | <i>Kabuli</i>    | <i>Ca_Kabuli_Chr05</i>       | 28335455                       | (A/C)       |
| 8275        | CakSNP8275     | <i>Kabuli</i>    | <i>Ca_Kabuli_Chr05</i>       | 28346497                       | (C/T)       |
| 8276        | CakSNP8276     | <i>Kabuli</i>    | <i>Ca_Kabuli_Chr05</i>       | 28360495                       | (C/T)       |
| 8277        | CakSNP8277     | <i>Kabuli</i>    | <i>Ca_Kabuli_Chr05</i>       | 28360492                       | (C/T)       |
| 8278        | CakSNP8278     | <i>Kabuli</i>    | <i>Ca_Kabuli_Chr05</i>       | 28360585                       | (A/G)       |
| 8279        | CakSNP8279     | <i>Kabuli</i>    | <i>Ca_Kabuli_Chr05</i>       | 28383374                       | (G/T)       |
| 8280        | CakSNP8280     | <i>Kabuli</i>    | <i>Ca_Kabuli_Chr05</i>       | 28491113                       | (G/A)       |
| 8281        | CakSNP8281     | <i>Kabuli</i>    | <i>Ca_Kabuli_Chr05</i>       | 28491131                       | (G/A)       |
| 8282        | CakSNP8282     | <i>Kabuli</i>    | <i>Ca_Kabuli_Chr05</i>       | 28509048                       | (G/A)       |
| 8283        | CakSNP8283     | <i>Kabuli</i>    | <i>Ca_Kabuli_Chr05</i>       | 28509066                       | (G/A)       |
| 8284        | CakSNP8284     | <i>Kabuli</i>    | <i>Ca_Kabuli_Chr05</i>       | 28562734                       | (G/A)       |
| 8285        | CakSNP8285     | <i>Kabuli</i>    | <i>Ca_Kabuli_Chr05</i>       | 28581814                       | (A/G)       |
| 8286        | CakSNP8286     | <i>Kabuli</i>    | <i>Ca_Kabuli_Chr05</i>       | 28581815                       | (C/G)       |
| 8287        | CakSNP8287     | <i>Kabuli</i>    | <i>Ca_Kabuli_Chr05</i>       | 28581827                       | (T/C)       |
| 8288        | CakSNP8288     | <i>Kabuli</i>    | <i>Ca_Kabuli_Chr05</i>       | 28581866                       | (T/C)       |
| 8289        | CakSNP8289     | <i>Kabuli</i>    | <i>Ca_Kabuli_Chr05</i>       | 28581926                       | (C/A)       |
| 8290        | CakSNP8290     | <i>Kabuli</i>    | <i>Ca_Kabuli_Chr05</i>       | 28582525                       | (C/T)       |
| 8291        | CakSNP8291     | <i>Kabuli</i>    | <i>Ca_Kabuli_Chr05</i>       | 28582806                       | (T/C)       |
| 8292        | CakSNP8292     | <i>Kabuli</i>    | <i>Ca_Kabuli_Chr05</i>       | 28582763                       | (A/G)       |
| 8293        | CakSNP8293     | <i>Kabuli</i>    | <i>Ca_Kabuli_Chr05</i>       | 28583402                       | (G/A)       |
| 8294        | CakSNP8294     | <i>Kabuli</i>    | <i>Ca_Kabuli_Chr05</i>       | 28583375                       | (C/G)       |
| 8295        | CakSNP8295     | <i>Kabuli</i>    | <i>Ca_Kabuli_Chr05</i>       | 28682973                       | (A/C)       |
| 8296        | CakSNP8296     | <i>Kabuli</i>    | <i>Ca_Kabuli_Chr05</i>       | 28682995                       | (G/A)       |
| 8297        | CakSNP8297     | <i>Kabuli</i>    | <i>Ca_Kabuli_Chr05</i>       | 28683084                       | (A/C)       |
| 8298        | CakSNP8298     | <i>Kabuli</i>    | <i>Ca_Kabuli_Chr05</i>       | 28683070                       | (T/A)       |
| 8299        | CakSNP8299     | <i>Kabuli</i>    | <i>Ca_Kabuli_Chr05</i>       | 28683069                       | (A/T)       |
| 8300        | CakSNP8300     | <i>Kabuli</i>    | <i>Ca_Kabuli_Chr05</i>       | 28714658                       | (C/T)       |
| 8301        | CakSNP8301     | <i>Kabuli</i>    | <i>Ca_Kabuli_Chr05</i>       | 28717362                       | (C/T)       |
| 8302        | CakSNP8302     | <i>Kabuli</i>    | <i>Ca_Kabuli_Chr05</i>       | 28717384                       | (C/T)       |
| 8303        | CakSNP8303     | <i>Kabuli</i>    | <i>Ca_Kabuli_Chr05</i>       | 28721236                       | (C/T)       |
| 8304        | CakSNP8304     | <i>Kabuli</i>    | <i>Ca_Kabuli_Chr05</i>       | 28721237                       | (A/G)       |
| 8305        | CakSNP8305     | <i>Kabuli</i>    | <i>Ca_Kabuli_Chr05</i>       | 28721386                       | (T/C)       |

| <b>S.N.</b> | <b>SNP IDs</b> | <b>Cultivars</b> | <b>Chromosomes/scaffolds</b> | <b>Physical positions (bp)</b> | <b>SNPs</b> |
|-------------|----------------|------------------|------------------------------|--------------------------------|-------------|
| 8306        | CakSNP8306     | <i>Kabuli</i>    | <i>Ca_Kabuli_Chr05</i>       | 28721383                       | (A/C)       |
| 8307        | CakSNP8307     | <i>Kabuli</i>    | <i>Ca_Kabuli_Chr05</i>       | 28746139                       | (A/G)       |
| 8308        | CakSNP8308     | <i>Kabuli</i>    | <i>Ca_Kabuli_Chr05</i>       | 28757467                       | (A/T)       |
| 8309        | CakSNP8309     | <i>Kabuli</i>    | <i>Ca_Kabuli_Chr05</i>       | 28757474                       | (T/C)       |
| 8310        | CakSNP8310     | <i>Kabuli</i>    | <i>Ca_Kabuli_Chr05</i>       | 28757479                       | (T/C)       |
| 8311        | CakSNP8311     | <i>Kabuli</i>    | <i>Ca_Kabuli_Chr05</i>       | 28757485                       | (A/C)       |
| 8312        | CakSNP8312     | <i>Kabuli</i>    | <i>Ca_Kabuli_Chr05</i>       | 28757507                       | (A/T)       |
| 8313        | CakSNP8313     | <i>Kabuli</i>    | <i>Ca_Kabuli_Chr05</i>       | 28758723                       | (A/G)       |
| 8314        | CakSNP8314     | <i>Kabuli</i>    | <i>Ca_Kabuli_Chr05</i>       | 28817832                       | (A/G)       |
| 8315        | CakSNP8315     | <i>Kabuli</i>    | <i>Ca_Kabuli_Chr05</i>       | 28827467                       | (A/G)       |
| 8316        | CakSNP8316     | <i>Kabuli</i>    | <i>Ca_Kabuli_Chr05</i>       | 28843854                       | (G/A)       |
| 8317        | CakSNP8317     | <i>Kabuli</i>    | <i>Ca_Kabuli_Chr05</i>       | 28843801                       | (A/G)       |
| 8318        | CakSNP8318     | <i>Kabuli</i>    | <i>Ca_Kabuli_Chr05</i>       | 28843795                       | (A/T)       |
| 8319        | CakSNP8319     | <i>Kabuli</i>    | <i>Ca_Kabuli_Chr05</i>       | 28843782                       | (C/G)       |
| 8320        | CakSNP8320     | <i>Kabuli</i>    | <i>Ca_Kabuli_Chr05</i>       | 28843775                       | (C/T)       |
| 8321        | CakSNP8321     | <i>Kabuli</i>    | <i>Ca_Kabuli_Chr05</i>       | 28854486                       | (C/T)       |
| 8322        | CakSNP8322     | <i>Kabuli</i>    | <i>Ca_Kabuli_Chr05</i>       | 28905203                       | (A/C)       |
| 8323        | CakSNP8323     | <i>Kabuli</i>    | <i>Ca_Kabuli_Chr05</i>       | 29007895                       | (T/C)       |
| 8324        | CakSNP8324     | <i>Kabuli</i>    | <i>Ca_Kabuli_Chr05</i>       | 29007886                       | (C/A)       |
| 8325        | CakSNP8325     | <i>Kabuli</i>    | <i>Ca_Kabuli_Chr05</i>       | 29007884                       | (A/C)       |
| 8326        | CakSNP8326     | <i>Kabuli</i>    | <i>Ca_Kabuli_Chr05</i>       | 29007882                       | (A/C)       |
| 8327        | CakSNP8327     | <i>Kabuli</i>    | <i>Ca_Kabuli_Chr05</i>       | 29007879                       | (T/C)       |
| 8328        | CakSNP8328     | <i>Kabuli</i>    | <i>Ca_Kabuli_Chr05</i>       | 29007847                       | (A/C)       |
| 8329        | CakSNP8329     | <i>Kabuli</i>    | <i>Ca_Kabuli_Chr05</i>       | 29007844                       | (T/C)       |
| 8330        | CakSNP8330     | <i>Kabuli</i>    | <i>Ca_Kabuli_Chr05</i>       | 29061056                       | (T/A)       |
| 8331        | CakSNP8331     | <i>Kabuli</i>    | <i>Ca_Kabuli_Chr05</i>       | 29061025                       | (A/C)       |
| 8332        | CakSNP8332     | <i>Kabuli</i>    | <i>Ca_Kabuli_Chr05</i>       | 29060992                       | (C/T)       |
| 8333        | CakSNP8333     | <i>Kabuli</i>    | <i>Ca_Kabuli_Chr05</i>       | 29062696                       | (G/A)       |
| 8334        | CakSNP8334     | <i>Kabuli</i>    | <i>Ca_Kabuli_Chr05</i>       | 29062738                       | (A/G)       |
| 8335        | CakSNP8335     | <i>Kabuli</i>    | <i>Ca_Kabuli_Chr05</i>       | 29079931                       | (G/A)       |
| 8336        | CakSNP8336     | <i>Kabuli</i>    | <i>Ca_Kabuli_Chr05</i>       | 29079962                       | (A/G)       |
| 8337        | CakSNP8337     | <i>Kabuli</i>    | <i>Ca_Kabuli_Chr05</i>       | 29080066                       | (G/C)       |
| 8338        | CakSNP8338     | <i>Kabuli</i>    | <i>Ca_Kabuli_Chr05</i>       | 29080060                       | (C/T)       |
| 8339        | CakSNP8339     | <i>Kabuli</i>    | <i>Ca_Kabuli_Chr05</i>       | 29111292                       | (T/G)       |
| 8340        | CakSNP8340     | <i>Kabuli</i>    | <i>Ca_Kabuli_Chr05</i>       | 29111293                       | (T/C)       |
| 8341        | CakSNP8341     | <i>Kabuli</i>    | <i>Ca_Kabuli_Chr05</i>       | 29186179                       | (T/G)       |
| 8342        | CakSNP8342     | <i>Kabuli</i>    | <i>Ca_Kabuli_Chr05</i>       | 29220980                       | (T/A)       |
| 8343        | CakSNP8343     | <i>Kabuli</i>    | <i>Ca_Kabuli_Chr05</i>       | 29221003                       | (T/C)       |
| 8344        | CakSNP8344     | <i>Kabuli</i>    | <i>Ca_Kabuli_Chr05</i>       | 29221919                       | (T/A)       |

| <b>S.N.</b> | <b>SNP IDs</b> | <b>Cultivars</b> | <b>Chromosomes/scaffolds</b> | <b>Physical positions (bp)</b> | <b>SNPs</b> |
|-------------|----------------|------------------|------------------------------|--------------------------------|-------------|
| 8345        | CakSNP8345     | <i>Kabuli</i>    | <i>Ca_Kabuli_Chr05</i>       | 29272117                       | (C/G)       |
| 8346        | CakSNP8346     | <i>Kabuli</i>    | <i>Ca_Kabuli_Chr05</i>       | 29272125                       | (C/T)       |
| 8347        | CakSNP8347     | <i>Kabuli</i>    | <i>Ca_Kabuli_Chr05</i>       | 29354269                       | (A/T)       |
| 8348        | CakSNP8348     | <i>Kabuli</i>    | <i>Ca_Kabuli_Chr05</i>       | 29422029                       | (T/A)       |
| 8349        | CakSNP8349     | <i>Kabuli</i>    | <i>Ca_Kabuli_Chr05</i>       | 29422066                       | (A/T)       |
| 8350        | CakSNP8350     | <i>Kabuli</i>    | <i>Ca_Kabuli_Chr05</i>       | 29422091                       | (C/T)       |
| 8351        | CakSNP8351     | <i>Kabuli</i>    | <i>Ca_Kabuli_Chr05</i>       | 29437139                       | (C/T)       |
| 8352        | CakSNP8352     | <i>Kabuli</i>    | <i>Ca_Kabuli_Chr05</i>       | 29437146                       | (C/A)       |
| 8353        | CakSNP8353     | <i>Kabuli</i>    | <i>Ca_Kabuli_Chr05</i>       | 29437159                       | (C/T)       |
| 8354        | CakSNP8354     | <i>Kabuli</i>    | <i>Ca_Kabuli_Chr05</i>       | 29437162                       | (A/C)       |
| 8355        | CakSNP8355     | <i>Kabuli</i>    | <i>Ca_Kabuli_Chr05</i>       | 29437171                       | (A/T)       |
| 8356        | CakSNP8356     | <i>Kabuli</i>    | <i>Ca_Kabuli_Chr05</i>       | 29437181                       | (A/C)       |
| 8357        | CakSNP8357     | <i>Kabuli</i>    | <i>Ca_Kabuli_Chr05</i>       | 29437189                       | (C/T)       |
| 8358        | CakSNP8358     | <i>Kabuli</i>    | <i>Ca_Kabuli_Chr05</i>       | 29437193                       | (A/C)       |
| 8359        | CakSNP8359     | <i>Kabuli</i>    | <i>Ca_Kabuli_Chr05</i>       | 29437182                       | (C/A)       |
| 8360        | CakSNP8360     | <i>Kabuli</i>    | <i>Ca_Kabuli_Chr05</i>       | 29528859                       | (A/T)       |
| 8361        | CakSNP8361     | <i>Kabuli</i>    | <i>Ca_Kabuli_Chr05</i>       | 29528890                       | (T/A)       |
| 8362        | CakSNP8362     | <i>Kabuli</i>    | <i>Ca_Kabuli_Chr05</i>       | 29528904                       | (T/G)       |
| 8363        | CakSNP8363     | <i>Kabuli</i>    | <i>Ca_Kabuli_Chr05</i>       | 29530996                       | (G/A)       |
| 8364        | CakSNP8364     | <i>Kabuli</i>    | <i>Ca_Kabuli_Chr05</i>       | 29531122                       | (A/T)       |
| 8365        | CakSNP8365     | <i>Kabuli</i>    | <i>Ca_Kabuli_Chr05</i>       | 29531113                       | (G/A)       |
| 8366        | CakSNP8366     | <i>Kabuli</i>    | <i>Ca_Kabuli_Chr05</i>       | 29531218                       | (A/T)       |
| 8367        | CakSNP8367     | <i>Kabuli</i>    | <i>Ca_Kabuli_Chr05</i>       | 29531416                       | (A/G)       |
| 8368        | CakSNP8368     | <i>Kabuli</i>    | <i>Ca_Kabuli_Chr05</i>       | 29567676                       | (T/C)       |
| 8369        | CakSNP8369     | <i>Kabuli</i>    | <i>Ca_Kabuli_Chr05</i>       | 29567820                       | (T/C)       |
| 8370        | CakSNP8370     | <i>Kabuli</i>    | <i>Ca_Kabuli_Chr05</i>       | 29576690                       | (A/T)       |
| 8371        | CakSNP8371     | <i>Kabuli</i>    | <i>Ca_Kabuli_Chr05</i>       | 29576689                       | (G/A)       |
| 8372        | CakSNP8372     | <i>Kabuli</i>    | <i>Ca_Kabuli_Chr05</i>       | 29576716                       | (A/C)       |
| 8373        | CakSNP8373     | <i>Kabuli</i>    | <i>Ca_Kabuli_Chr05</i>       | 29608657                       | (T/C)       |
| 8374        | CakSNP8374     | <i>Kabuli</i>    | <i>Ca_Kabuli_Chr05</i>       | 29641659                       | (T/C)       |
| 8375        | CakSNP8375     | <i>Kabuli</i>    | <i>Ca_Kabuli_Chr05</i>       | 29658258                       | (G/C)       |
| 8376        | CakSNP8376     | <i>Kabuli</i>    | <i>Ca_Kabuli_Chr05</i>       | 29658280                       | (A/C)       |
| 8377        | CakSNP8377     | <i>Kabuli</i>    | <i>Ca_Kabuli_Chr05</i>       | 29667787                       | (C/G)       |
| 8378        | CakSNP8378     | <i>Kabuli</i>    | <i>Ca_Kabuli_Chr05</i>       | 29667783                       | (C/T)       |
| 8379        | CakSNP8379     | <i>Kabuli</i>    | <i>Ca_Kabuli_Chr05</i>       | 29667774                       | (G/C)       |
| 8380        | CakSNP8380     | <i>Kabuli</i>    | <i>Ca_Kabuli_Chr05</i>       | 29809862                       | (A/C)       |
| 8381        | CakSNP8381     | <i>Kabuli</i>    | <i>Ca_Kabuli_Chr05</i>       | 29816799                       | (T/C)       |
| 8382        | CakSNP8382     | <i>Kabuli</i>    | <i>Ca_Kabuli_Chr05</i>       | 29816800                       | (T/A)       |
| 8383        | CakSNP8383     | <i>Kabuli</i>    | <i>Ca_Kabuli_Chr05</i>       | 29824218                       | (T/G)       |



| <b>S.N.</b> | <b>SNP IDs</b> | <b>Cultivars</b> | <b>Chromosomes/scaffolds</b> | <b>Physical positions (bp)</b> | <b>SNPs</b> |
|-------------|----------------|------------------|------------------------------|--------------------------------|-------------|
| 8384        | CakSNP8384     | <i>Kabuli</i>    | <i>Ca_Kabuli_Chr05</i>       | 29852130                       | (T/C)       |
| 8385        | CakSNP8385     | <i>Kabuli</i>    | <i>Ca_Kabuli_Chr05</i>       | 29852105                       | (T/G)       |
| 8386        | CakSNP8386     | <i>Kabuli</i>    | <i>Ca_Kabuli_Chr05</i>       | 29886086                       | (T/A)       |
| 8387        | CakSNP8387     | <i>Kabuli</i>    | <i>Ca_Kabuli_Chr05</i>       | 29981826                       | (A/G)       |
| 8388        | CakSNP8388     | <i>Kabuli</i>    | <i>Ca_Kabuli_Chr05</i>       | 29999414                       | (C/T)       |
| 8389        | CakSNP8389     | <i>Kabuli</i>    | <i>Ca_Kabuli_Chr05</i>       | 29999427                       | (G/A)       |
| 8390        | CakSNP8390     | <i>Kabuli</i>    | <i>Ca_Kabuli_Chr05</i>       | 29999433                       | (C/A)       |
| 8391        | CakSNP8391     | <i>Kabuli</i>    | <i>Ca_Kabuli_Chr05</i>       | 29999465                       | (T/G)       |
| 8392        | CakSNP8392     | <i>Kabuli</i>    | <i>Ca_Kabuli_Chr05</i>       | 29999476                       | (G/A)       |
| 8393        | CakSNP8393     | <i>Kabuli</i>    | <i>Ca_Kabuli_Chr05</i>       | 29999523                       | (A/T)       |
| 8394        | CakSNP8394     | <i>Kabuli</i>    | <i>Ca_Kabuli_Chr05</i>       | 30035763                       | (A/T)       |
| 8395        | CakSNP8395     | <i>Kabuli</i>    | <i>Ca_Kabuli_Chr05</i>       | 30049265                       | (G/A)       |
| 8396        | CakSNP8396     | <i>Kabuli</i>    | <i>Ca_Kabuli_Chr05</i>       | 30053540                       | (C/G)       |
| 8397        | CakSNP8397     | <i>Kabuli</i>    | <i>Ca_Kabuli_Chr05</i>       | 30060160                       | (C/T)       |
| 8398        | CakSNP8398     | <i>Kabuli</i>    | <i>Ca_Kabuli_Chr05</i>       | 30086073                       | (A/G)       |
| 8399        | CakSNP8399     | <i>Kabuli</i>    | <i>Ca_Kabuli_Chr05</i>       | 30086232                       | (A/C)       |
| 8400        | CakSNP8400     | <i>Kabuli</i>    | <i>Ca_Kabuli_Chr05</i>       | 30090906                       | (A/G)       |
| 8401        | CakSNP8401     | <i>Kabuli</i>    | <i>Ca_Kabuli_Chr05</i>       | 30091063                       | (G/A)       |
| 8402        | CakSNP8402     | <i>Kabuli</i>    | <i>Ca_Kabuli_Chr05</i>       | 30116978                       | (C/T)       |
| 8403        | CakSNP8403     | <i>Kabuli</i>    | <i>Ca_Kabuli_Chr05</i>       | 30116992                       | (T/G)       |
| 8404        | CakSNP8404     | <i>Kabuli</i>    | <i>Ca_Kabuli_Chr05</i>       | 30159226                       | (C/T)       |
| 8405        | CakSNP8405     | <i>Kabuli</i>    | <i>Ca_Kabuli_Chr05</i>       | 30159173                       | (G/A)       |
| 8406        | CakSNP8406     | <i>Kabuli</i>    | <i>Ca_Kabuli_Chr05</i>       | 30159161                       | (G/A)       |
| 8407        | CakSNP8407     | <i>Kabuli</i>    | <i>Ca_Kabuli_Chr05</i>       | 30191389                       | (A/C)       |
| 8408        | CakSNP8408     | <i>Kabuli</i>    | <i>Ca_Kabuli_Chr05</i>       | 30248447                       | (C/A)       |
| 8409        | CakSNP8409     | <i>Kabuli</i>    | <i>Ca_Kabuli_Chr05</i>       | 30258178                       | (T/G)       |
| 8410        | CakSNP8410     | <i>Kabuli</i>    | <i>Ca_Kabuli_Chr05</i>       | 30287853                       | (C/T)       |
| 8411        | CakSNP8411     | <i>Kabuli</i>    | <i>Ca_Kabuli_Chr05</i>       | 30304076                       | (A/T)       |
| 8412        | CakSNP8412     | <i>Kabuli</i>    | <i>Ca_Kabuli_Chr05</i>       | 30319316                       | (A/G)       |
| 8413        | CakSNP8413     | <i>Kabuli</i>    | <i>Ca_Kabuli_Chr05</i>       | 30359047                       | (T/C)       |
| 8414        | CakSNP8414     | <i>Kabuli</i>    | <i>Ca_Kabuli_Chr05</i>       | 30359022                       | (G/A)       |
| 8415        | CakSNP8415     | <i>Kabuli</i>    | <i>Ca_Kabuli_Chr05</i>       | 30360185                       | (T/C)       |
| 8416        | CakSNP8416     | <i>Kabuli</i>    | <i>Ca_Kabuli_Chr05</i>       | 30360348                       | (T/C)       |
| 8417        | CakSNP8417     | <i>Kabuli</i>    | <i>Ca_Kabuli_Chr05</i>       | 30367349                       | (G/T)       |
| 8418        | CakSNP8418     | <i>Kabuli</i>    | <i>Ca_Kabuli_Chr05</i>       | 30373542                       | (A/G)       |
| 8419        | CakSNP8419     | <i>Kabuli</i>    | <i>Ca_Kabuli_Chr05</i>       | 30373783                       | (T/A)       |
| 8420        | CakSNP8420     | <i>Kabuli</i>    | <i>Ca_Kabuli_Chr05</i>       | 30376661                       | (C/G)       |
| 8421        | CakSNP8421     | <i>Kabuli</i>    | <i>Ca_Kabuli_Chr05</i>       | 30376722                       | (T/C)       |
| 8422        | CakSNP8422     | <i>Kabuli</i>    | <i>Ca_Kabuli_Chr05</i>       | 30376723                       | (T/C)       |

| <b>S.N.</b> | <b>SNP IDs</b> | <b>Cultivars</b> | <b>Chromosomes/scaffolds</b> | <b>Physical positions (bp)</b> | <b>SNPs</b> |
|-------------|----------------|------------------|------------------------------|--------------------------------|-------------|
| 8423        | CakSNP8423     | <i>Kabuli</i>    | <i>Ca_Kabuli_Chr05</i>       | 30378114                       | (A/G)       |
| 8424        | CakSNP8424     | <i>Kabuli</i>    | <i>Ca_Kabuli_Chr05</i>       | 30378184                       | (A/G)       |
| 8425        | CakSNP8425     | <i>Kabuli</i>    | <i>Ca_Kabuli_Chr05</i>       | 30407725                       | (C/G)       |
| 8426        | CakSNP8426     | <i>Kabuli</i>    | <i>Ca_Kabuli_Chr05</i>       | 30408006                       | (C/T)       |
| 8427        | CakSNP8427     | <i>Kabuli</i>    | <i>Ca_Kabuli_Chr05</i>       | 30438913                       | (G/A)       |
| 8428        | CakSNP8428     | <i>Kabuli</i>    | <i>Ca_Kabuli_Chr05</i>       | 30443858                       | (A/T)       |
| 8429        | CakSNP8429     | <i>Kabuli</i>    | <i>Ca_Kabuli_Chr05</i>       | 30562430                       | (C/G)       |
| 8430        | CakSNP8430     | <i>Kabuli</i>    | <i>Ca_Kabuli_Chr05</i>       | 30562524                       | (G/T)       |
| 8431        | CakSNP8431     | <i>Kabuli</i>    | <i>Ca_Kabuli_Chr05</i>       | 30601932                       | (T/C)       |
| 8432        | CakSNP8432     | <i>Kabuli</i>    | <i>Ca_Kabuli_Chr05</i>       | 30601926                       | (T/C)       |
| 8433        | CakSNP8433     | <i>Kabuli</i>    | <i>Ca_Kabuli_Chr05</i>       | 30601920                       | (T/C)       |
| 8434        | CakSNP8434     | <i>Kabuli</i>    | <i>Ca_Kabuli_Chr05</i>       | 30627937                       | (G/T)       |
| 8435        | CakSNP8435     | <i>Kabuli</i>    | <i>Ca_Kabuli_Chr05</i>       | 30632697                       | (A/G)       |
| 8436        | CakSNP8436     | <i>Kabuli</i>    | <i>Ca_Kabuli_Chr05</i>       | 30655941                       | (T/C)       |
| 8437        | CakSNP8437     | <i>Kabuli</i>    | <i>Ca_Kabuli_Chr05</i>       | 30656058                       | (A/T)       |
| 8438        | CakSNP8438     | <i>Kabuli</i>    | <i>Ca_Kabuli_Chr05</i>       | 30690891                       | (T/G)       |
| 8439        | CakSNP8439     | <i>Kabuli</i>    | <i>Ca_Kabuli_Chr05</i>       | 30690852                       | (G/A)       |
| 8440        | CakSNP8440     | <i>Kabuli</i>    | <i>Ca_Kabuli_Chr05</i>       | 30690885                       | (A/G)       |
| 8441        | CakSNP8441     | <i>Kabuli</i>    | <i>Ca_Kabuli_Chr05</i>       | 30691510                       | (A/G)       |
| 8442        | CakSNP8442     | <i>Kabuli</i>    | <i>Ca_Kabuli_Chr05</i>       | 30691515                       | (G/A)       |
| 8443        | CakSNP8443     | <i>Kabuli</i>    | <i>Ca_Kabuli_Chr05</i>       | 30691543                       | (A/G)       |
| 8444        | CakSNP8444     | <i>Kabuli</i>    | <i>Ca_Kabuli_Chr05</i>       | 30697511                       | (G/A)       |
| 8445        | CakSNP8445     | <i>Kabuli</i>    | <i>Ca_Kabuli_Chr05</i>       | 30745571                       | (G/T)       |
| 8446        | CakSNP8446     | <i>Kabuli</i>    | <i>Ca_Kabuli_Chr05</i>       | 30749553                       | (A/T)       |
| 8447        | CakSNP8447     | <i>Kabuli</i>    | <i>Ca_Kabuli_Chr05</i>       | 30749696                       | (A/T)       |
| 8448        | CakSNP8448     | <i>Kabuli</i>    | <i>Ca_Kabuli_Chr05</i>       | 30755644                       | (A/G)       |
| 8449        | CakSNP8449     | <i>Kabuli</i>    | <i>Ca_Kabuli_Chr05</i>       | 30755584                       | (G/A)       |
| 8450        | CakSNP8450     | <i>Kabuli</i>    | <i>Ca_Kabuli_Chr05</i>       | 30811250                       | (A/T)       |
| 8451        | CakSNP8451     | <i>Kabuli</i>    | <i>Ca_Kabuli_Chr05</i>       | 30864010                       | (T/C)       |
| 8452        | CakSNP8452     | <i>Kabuli</i>    | <i>Ca_Kabuli_Chr05</i>       | 30868770                       | (G/C)       |
| 8453        | CakSNP8453     | <i>Kabuli</i>    | <i>Ca_Kabuli_Chr05</i>       | 30868695                       | (G/C)       |
| 8454        | CakSNP8454     | <i>Kabuli</i>    | <i>Ca_Kabuli_Chr05</i>       | 30878047                       | (C/T)       |
| 8455        | CakSNP8455     | <i>Kabuli</i>    | <i>Ca_Kabuli_Chr05</i>       | 30878092                       | (G/T)       |
| 8456        | CakSNP8456     | <i>Kabuli</i>    | <i>Ca_Kabuli_Chr05</i>       | 30878100                       | (T/A)       |
| 8457        | CakSNP8457     | <i>Kabuli</i>    | <i>Ca_Kabuli_Chr05</i>       | 30890480                       | (G/C)       |
| 8458        | CakSNP8458     | <i>Kabuli</i>    | <i>Ca_Kabuli_Chr05</i>       | 30962640                       | (A/T)       |
| 8459        | CakSNP8459     | <i>Kabuli</i>    | <i>Ca_Kabuli_Chr05</i>       | 30962641                       | (C/A)       |
| 8460        | CakSNP8460     | <i>Kabuli</i>    | <i>Ca_Kabuli_Chr05</i>       | 30962650                       | (G/A)       |
| 8461        | CakSNP8461     | <i>Kabuli</i>    | <i>Ca_Kabuli_Chr05</i>       | 30964628                       | (A/G)       |

| <b>S.N.</b> | <b>SNP IDs</b> | <b>Cultivars</b> | <b>Chromosomes/scaffolds</b> | <b>Physical positions (bp)</b> | <b>SNPs</b> |
|-------------|----------------|------------------|------------------------------|--------------------------------|-------------|
| 8462        | CakSNP8462     | <i>Kabuli</i>    | <i>Ca_Kabuli_Chr05</i>       | 31024408                       | (T/C)       |
| 8463        | CakSNP8463     | <i>Kabuli</i>    | <i>Ca_Kabuli_Chr05</i>       | 31025764                       | (G/T)       |
| 8464        | CakSNP8464     | <i>Kabuli</i>    | <i>Ca_Kabuli_Chr05</i>       | 31034500                       | (T/C)       |
| 8465        | CakSNP8465     | <i>Kabuli</i>    | <i>Ca_Kabuli_Chr05</i>       | 31034898                       | (A/G)       |
| 8466        | CakSNP8466     | <i>Kabuli</i>    | <i>Ca_Kabuli_Chr05</i>       | 31064173                       | (C/G)       |
| 8467        | CakSNP8467     | <i>Kabuli</i>    | <i>Ca_Kabuli_Chr05</i>       | 31072213                       | (T/C)       |
| 8468        | CakSNP8468     | <i>Kabuli</i>    | <i>Ca_Kabuli_Chr05</i>       | 31072276                       | (G/A)       |
| 8469        | CakSNP8469     | <i>Kabuli</i>    | <i>Ca_Kabuli_Chr05</i>       | 31084839                       | (A/C)       |
| 8470        | CakSNP8470     | <i>Kabuli</i>    | <i>Ca_Kabuli_Chr05</i>       | 31088698                       | (T/G)       |
| 8471        | CakSNP8471     | <i>Kabuli</i>    | <i>Ca_Kabuli_Chr05</i>       | 31126125                       | (C/T)       |
| 8472        | CakSNP8472     | <i>Kabuli</i>    | <i>Ca_Kabuli_Chr05</i>       | 31131830                       | (T/C)       |
| 8473        | CakSNP8473     | <i>Kabuli</i>    | <i>Ca_Kabuli_Chr05</i>       | 31132568                       | (A/T)       |
| 8474        | CakSNP8474     | <i>Kabuli</i>    | <i>Ca_Kabuli_Chr05</i>       | 31138650                       | (G/A)       |
| 8475        | CakSNP8475     | <i>Kabuli</i>    | <i>Ca_Kabuli_Chr05</i>       | 31140531                       | (T/C)       |
| 8476        | CakSNP8476     | <i>Kabuli</i>    | <i>Ca_Kabuli_Chr05</i>       | 31162533                       | (G/A)       |
| 8477        | CakSNP8477     | <i>Kabuli</i>    | <i>Ca_Kabuli_Chr05</i>       | 31164387                       | (G/C)       |
| 8478        | CakSNP8478     | <i>Kabuli</i>    | <i>Ca_Kabuli_Chr05</i>       | 31164539                       | (T/C)       |
| 8479        | CakSNP8479     | <i>Kabuli</i>    | <i>Ca_Kabuli_Chr05</i>       | 31165048                       | (T/C)       |
| 8480        | CakSNP8480     | <i>Kabuli</i>    | <i>Ca_Kabuli_Chr05</i>       | 31165039                       | (T/C)       |
| 8481        | CakSNP8481     | <i>Kabuli</i>    | <i>Ca_Kabuli_Chr05</i>       | 31165035                       | (T/C)       |
| 8482        | CakSNP8482     | <i>Kabuli</i>    | <i>Ca_Kabuli_Chr05</i>       | 31165002                       | (A/C)       |
| 8483        | CakSNP8483     | <i>Kabuli</i>    | <i>Ca_Kabuli_Chr05</i>       | 31171555                       | (G/A)       |
| 8484        | CakSNP8484     | <i>Kabuli</i>    | <i>Ca_Kabuli_Chr05</i>       | 31176722                       | (T/G)       |
| 8485        | CakSNP8485     | <i>Kabuli</i>    | <i>Ca_Kabuli_Chr05</i>       | 31176810                       | (C/T)       |
| 8486        | CakSNP8486     | <i>Kabuli</i>    | <i>Ca_Kabuli_Chr05</i>       | 31176844                       | (G/A)       |
| 8487        | CakSNP8487     | <i>Kabuli</i>    | <i>Ca_Kabuli_Chr05</i>       | 31192415                       | (C/T)       |
| 8488        | CakSNP8488     | <i>Kabuli</i>    | <i>Ca_Kabuli_Chr05</i>       | 31192413                       | (G/A)       |
| 8489        | CakSNP8489     | <i>Kabuli</i>    | <i>Ca_Kabuli_Chr05</i>       | 31194845                       | (G/T)       |
| 8490        | CakSNP8490     | <i>Kabuli</i>    | <i>Ca_Kabuli_Chr05</i>       | 31194974                       | (T/C)       |
| 8491        | CakSNP8491     | <i>Kabuli</i>    | <i>Ca_Kabuli_Chr05</i>       | 31194988                       | (G/T)       |
| 8492        | CakSNP8492     | <i>Kabuli</i>    | <i>Ca_Kabuli_Chr05</i>       | 31194989                       | (A/C)       |
| 8493        | CakSNP8493     | <i>Kabuli</i>    | <i>Ca_Kabuli_Chr05</i>       | 31215109                       | (C/T)       |
| 8494        | CakSNP8494     | <i>Kabuli</i>    | <i>Ca_Kabuli_Chr05</i>       | 31310698                       | (C/T)       |
| 8495        | CakSNP8495     | <i>Kabuli</i>    | <i>Ca_Kabuli_Chr05</i>       | 31310702                       | (C/G)       |
| 8496        | CakSNP8496     | <i>Kabuli</i>    | <i>Ca_Kabuli_Chr05</i>       | 31310703                       | (A/G)       |
| 8497        | CakSNP8497     | <i>Kabuli</i>    | <i>Ca_Kabuli_Chr05</i>       | 31310741                       | (A/G)       |
| 8498        | CakSNP8498     | <i>Kabuli</i>    | <i>Ca_Kabuli_Chr05</i>       | 31314012                       | (A/C)       |
| 8499        | CakSNP8499     | <i>Kabuli</i>    | <i>Ca_Kabuli_Chr05</i>       | 31314056                       | (A/C)       |
| 8500        | CakSNP8500     | <i>Kabuli</i>    | <i>Ca_Kabuli_Chr05</i>       | 31344725                       | (G/A)       |

| <b>S.N.</b> | <b>SNP IDs</b> | <b>Cultivars</b> | <b>Chromosomes/scaffolds</b> | <b>Physical positions (bp)</b> | <b>SNPs</b> |
|-------------|----------------|------------------|------------------------------|--------------------------------|-------------|
| 8501        | CakSNP8501     | <i>Kabuli</i>    | <i>Ca_Kabuli_Chr05</i>       | 31377103                       | (C/T)       |
| 8502        | CakSNP8502     | <i>Kabuli</i>    | <i>Ca_Kabuli_Chr05</i>       | 31377122                       | (C/T)       |
| 8503        | CakSNP8503     | <i>Kabuli</i>    | <i>Ca_Kabuli_Chr05</i>       | 31377134                       | (A/T)       |
| 8504        | CakSNP8504     | <i>Kabuli</i>    | <i>Ca_Kabuli_Chr05</i>       | 31390221                       | (A/G)       |
| 8505        | CakSNP8505     | <i>Kabuli</i>    | <i>Ca_Kabuli_Chr05</i>       | 31390319                       | (C/T)       |
| 8506        | CakSNP8506     | <i>Kabuli</i>    | <i>Ca_Kabuli_Chr05</i>       | 31522389                       | (T/G)       |
| 8507        | CakSNP8507     | <i>Kabuli</i>    | <i>Ca_Kabuli_Chr05</i>       | 31548555                       | (G/A)       |
| 8508        | CakSNP8508     | <i>Kabuli</i>    | <i>Ca_Kabuli_Chr05</i>       | 31651335                       | (G/T)       |
| 8509        | CakSNP8509     | <i>Kabuli</i>    | <i>Ca_Kabuli_Chr05</i>       | 31651336                       | (T/G)       |
| 8510        | CakSNP8510     | <i>Kabuli</i>    | <i>Ca_Kabuli_Chr05</i>       | 31653418                       | (T/C)       |
| 8511        | CakSNP8511     | <i>Kabuli</i>    | <i>Ca_Kabuli_Chr05</i>       | 31653423                       | (T/C)       |
| 8512        | CakSNP8512     | <i>Kabuli</i>    | <i>Ca_Kabuli_Chr05</i>       | 31653432                       | (A/G)       |
| 8513        | CakSNP8513     | <i>Kabuli</i>    | <i>Ca_Kabuli_Chr05</i>       | 31653437                       | (C/T)       |
| 8514        | CakSNP8514     | <i>Kabuli</i>    | <i>Ca_Kabuli_Chr05</i>       | 31653452                       | (C/A)       |
| 8515        | CakSNP8515     | <i>Kabuli</i>    | <i>Ca_Kabuli_Chr05</i>       | 31687881                       | (C/T)       |
| 8516        | CakSNP8516     | <i>Kabuli</i>    | <i>Ca_Kabuli_Chr05</i>       | 31687891                       | (A/C)       |
| 8517        | CakSNP8517     | <i>Kabuli</i>    | <i>Ca_Kabuli_Chr05</i>       | 31696236                       | (T/C)       |
| 8518        | CakSNP8518     | <i>Kabuli</i>    | <i>Ca_Kabuli_Chr05</i>       | 31710670                       | (G/A)       |
| 8519        | CakSNP8519     | <i>Kabuli</i>    | <i>Ca_Kabuli_Chr05</i>       | 31724217                       | (G/A)       |
| 8520        | CakSNP8520     | <i>Kabuli</i>    | <i>Ca_Kabuli_Chr05</i>       | 31724272                       | (C/T)       |
| 8521        | CakSNP8521     | <i>Kabuli</i>    | <i>Ca_Kabuli_Chr05</i>       | 31724332                       | (G/A)       |
| 8522        | CakSNP8522     | <i>Kabuli</i>    | <i>Ca_Kabuli_Chr05</i>       | 31750150                       | (T/G)       |
| 8523        | CakSNP8523     | <i>Kabuli</i>    | <i>Ca_Kabuli_Chr05</i>       | 31750242                       | (A/G)       |
| 8524        | CakSNP8524     | <i>Kabuli</i>    | <i>Ca_Kabuli_Chr05</i>       | 31758166                       | (T/C)       |
| 8525        | CakSNP8525     | <i>Kabuli</i>    | <i>Ca_Kabuli_Chr05</i>       | 31802684                       | (G/T)       |
| 8526        | CakSNP8526     | <i>Kabuli</i>    | <i>Ca_Kabuli_Chr05</i>       | 31802727                       | (G/A)       |
| 8527        | CakSNP8527     | <i>Kabuli</i>    | <i>Ca_Kabuli_Chr05</i>       | 31816202                       | (A/C)       |
| 8528        | CakSNP8528     | <i>Kabuli</i>    | <i>Ca_Kabuli_Chr05</i>       | 31816228                       | (A/G)       |
| 8529        | CakSNP8529     | <i>Kabuli</i>    | <i>Ca_Kabuli_Chr05</i>       | 31935674                       | (T/C)       |
| 8530        | CakSNP8530     | <i>Kabuli</i>    | <i>Ca_Kabuli_Chr05</i>       | 31951925                       | (G/A)       |
| 8531        | CakSNP8531     | <i>Kabuli</i>    | <i>Ca_Kabuli_Chr05</i>       | 31951944                       | (C/T)       |
| 8532        | CakSNP8532     | <i>Kabuli</i>    | <i>Ca_Kabuli_Chr05</i>       | 31985390                       | (G/C)       |
| 8533        | CakSNP8533     | <i>Kabuli</i>    | <i>Ca_Kabuli_Chr05</i>       | 32011781                       | (G/T)       |
| 8534        | CakSNP8534     | <i>Kabuli</i>    | <i>Ca_Kabuli_Chr05</i>       | 32011792                       | (T/G)       |
| 8535        | CakSNP8535     | <i>Kabuli</i>    | <i>Ca_Kabuli_Chr05</i>       | 32015967                       | (T/C)       |
| 8536        | CakSNP8536     | <i>Kabuli</i>    | <i>Ca_Kabuli_Chr05</i>       | 32019864                       | (G/A)       |
| 8537        | CakSNP8537     | <i>Kabuli</i>    | <i>Ca_Kabuli_Chr05</i>       | 32023925                       | (T/C)       |
| 8538        | CakSNP8538     | <i>Kabuli</i>    | <i>Ca_Kabuli_Chr05</i>       | 32090295                       | (C/A)       |
| 8539        | CakSNP8539     | <i>Kabuli</i>    | <i>Ca_Kabuli_Chr05</i>       | 32144081                       | (G/C)       |

| <b>S.N.</b> | <b>SNP IDs</b> | <b>Cultivars</b> | <b>Chromosomes/scaffolds</b> | <b>Physical positions (bp)</b> | <b>SNPs</b> |
|-------------|----------------|------------------|------------------------------|--------------------------------|-------------|
| 8540        | CakSNP8540     | <i>Kabuli</i>    | <i>Ca_Kabuli_Chr05</i>       | 32144108                       | (A/C)       |
| 8541        | CakSNP8541     | <i>Kabuli</i>    | <i>Ca_Kabuli_Chr05</i>       | 32144120                       | (C/T)       |
| 8542        | CakSNP8542     | <i>Kabuli</i>    | <i>Ca_Kabuli_Chr05</i>       | 32147522                       | (C/T)       |
| 8543        | CakSNP8543     | <i>Kabuli</i>    | <i>Ca_Kabuli_Chr05</i>       | 32171632                       | (G/A)       |
| 8544        | CakSNP8544     | <i>Kabuli</i>    | <i>Ca_Kabuli_Chr05</i>       | 32171652                       | (T/A)       |
| 8545        | CakSNP8545     | <i>Kabuli</i>    | <i>Ca_Kabuli_Chr05</i>       | 32209547                       | (C/G)       |
| 8546        | CakSNP8546     | <i>Kabuli</i>    | <i>Ca_Kabuli_Chr05</i>       | 32209750                       | (T/C)       |
| 8547        | CakSNP8547     | <i>Kabuli</i>    | <i>Ca_Kabuli_Chr05</i>       | 32229485                       | (A/T)       |
| 8548        | CakSNP8548     | <i>Kabuli</i>    | <i>Ca_Kabuli_Chr05</i>       | 32291158                       | (C/T)       |
| 8549        | CakSNP8549     | <i>Kabuli</i>    | <i>Ca_Kabuli_Chr05</i>       | 32291118                       | (G/A)       |
| 8550        | CakSNP8550     | <i>Kabuli</i>    | <i>Ca_Kabuli_Chr05</i>       | 32328110                       | (T/C)       |
| 8551        | CakSNP8551     | <i>Kabuli</i>    | <i>Ca_Kabuli_Chr05</i>       | 32346655                       | (A/C)       |
| 8552        | CakSNP8552     | <i>Kabuli</i>    | <i>Ca_Kabuli_Chr05</i>       | 32357511                       | (G/A)       |
| 8553        | CakSNP8553     | <i>Kabuli</i>    | <i>Ca_Kabuli_Chr05</i>       | 32368485                       | (G/C)       |
| 8554        | CakSNP8554     | <i>Kabuli</i>    | <i>Ca_Kabuli_Chr05</i>       | 32369197                       | (C/A)       |
| 8555        | CakSNP8555     | <i>Kabuli</i>    | <i>Ca_Kabuli_Chr05</i>       | 32399391                       | (T/A)       |
| 8556        | CakSNP8556     | <i>Kabuli</i>    | <i>Ca_Kabuli_Chr05</i>       | 32476432                       | (A/G)       |
| 8557        | CakSNP8557     | <i>Kabuli</i>    | <i>Ca_Kabuli_Chr05</i>       | 32476423                       | (A/G)       |
| 8558        | CakSNP8558     | <i>Kabuli</i>    | <i>Ca_Kabuli_Chr05</i>       | 32516773                       | (T/A)       |
| 8559        | CakSNP8559     | <i>Kabuli</i>    | <i>Ca_Kabuli_Chr05</i>       | 32524646                       | (T/C)       |
| 8560        | CakSNP8560     | <i>Kabuli</i>    | <i>Ca_Kabuli_Chr05</i>       | 32566131                       | (C/G)       |
| 8561        | CakSNP8561     | <i>Kabuli</i>    | <i>Ca_Kabuli_Chr05</i>       | 32598221                       | (C/A)       |
| 8562        | CakSNP8562     | <i>Kabuli</i>    | <i>Ca_Kabuli_Chr05</i>       | 32623507                       | (T/G)       |
| 8563        | CakSNP8563     | <i>Kabuli</i>    | <i>Ca_Kabuli_Chr05</i>       | 32631930                       | (C/A)       |
| 8564        | CakSNP8564     | <i>Kabuli</i>    | <i>Ca_Kabuli_Chr05</i>       | 32643759                       | (A/G)       |
| 8565        | CakSNP8565     | <i>Kabuli</i>    | <i>Ca_Kabuli_Chr05</i>       | 32732862                       | (A/T)       |
| 8566        | CakSNP8566     | <i>Kabuli</i>    | <i>Ca_Kabuli_Chr05</i>       | 32732913                       | (A/T)       |
| 8567        | CakSNP8567     | <i>Kabuli</i>    | <i>Ca_Kabuli_Chr05</i>       | 32759420                       | (T/A)       |
| 8568        | CakSNP8568     | <i>Kabuli</i>    | <i>Ca_Kabuli_Chr05</i>       | 32761420                       | (G/A)       |
| 8569        | CakSNP8569     | <i>Kabuli</i>    | <i>Ca_Kabuli_Chr05</i>       | 32794288                       | (G/A)       |
| 8570        | CakSNP8570     | <i>Kabuli</i>    | <i>Ca_Kabuli_Chr05</i>       | 32816626                       | (G/T)       |
| 8571        | CakSNP8571     | <i>Kabuli</i>    | <i>Ca_Kabuli_Chr05</i>       | 32839347                       | (C/A)       |
| 8572        | CakSNP8572     | <i>Kabuli</i>    | <i>Ca_Kabuli_Chr05</i>       | 32840512                       | (A/T)       |
| 8573        | CakSNP8573     | <i>Kabuli</i>    | <i>Ca_Kabuli_Chr05</i>       | 32840522                       | (T/C)       |
| 8574        | CakSNP8574     | <i>Kabuli</i>    | <i>Ca_Kabuli_Chr05</i>       | 32840541                       | (T/G)       |
| 8575        | CakSNP8575     | <i>Kabuli</i>    | <i>Ca_Kabuli_Chr05</i>       | 32859483                       | (T/A)       |
| 8576        | CakSNP8576     | <i>Kabuli</i>    | <i>Ca_Kabuli_Chr05</i>       | 32859504                       | (T/G)       |
| 8577        | CakSNP8577     | <i>Kabuli</i>    | <i>Ca_Kabuli_Chr05</i>       | 32859515                       | (T/G)       |
| 8578        | CakSNP8578     | <i>Kabuli</i>    | <i>Ca_Kabuli_Chr05</i>       | 32860087                       | (C/T)       |

| <b>S.N.</b> | <b>SNP IDs</b> | <b>Cultivars</b> | <b>Chromosomes/scaffolds</b> | <b>Physical positions (bp)</b> | <b>SNPs</b> |
|-------------|----------------|------------------|------------------------------|--------------------------------|-------------|
| 8579        | CakSNP8579     | <i>Kabuli</i>    | <i>Ca_Kabuli_Chr05</i>       | 32978975                       | (A/T)       |
| 8580        | CakSNP8580     | <i>Kabuli</i>    | <i>Ca_Kabuli_Chr05</i>       | 33052329                       | (C/G)       |
| 8581        | CakSNP8581     | <i>Kabuli</i>    | <i>Ca_Kabuli_Chr05</i>       | 33143038                       | (A/T)       |
| 8582        | CakSNP8582     | <i>Kabuli</i>    | <i>Ca_Kabuli_Chr05</i>       | 33189733                       | (A/G)       |
| 8583        | CakSNP8583     | <i>Kabuli</i>    | <i>Ca_Kabuli_Chr05</i>       | 33189791                       | (G/A)       |
| 8584        | CakSNP8584     | <i>Kabuli</i>    | <i>Ca_Kabuli_Chr05</i>       | 33189808                       | (A/G)       |
| 8585        | CakSNP8585     | <i>Kabuli</i>    | <i>Ca_Kabuli_Chr05</i>       | 33255823                       | (T/G)       |
| 8586        | CakSNP8586     | <i>Kabuli</i>    | <i>Ca_Kabuli_Chr05</i>       | 33255971                       | (G/T)       |
| 8587        | CakSNP8587     | <i>Kabuli</i>    | <i>Ca_Kabuli_Chr05</i>       | 33256053                       | (C/G)       |
| 8588        | CakSNP8588     | <i>Kabuli</i>    | <i>Ca_Kabuli_Chr05</i>       | 33256089                       | (T/C)       |
| 8589        | CakSNP8589     | <i>Kabuli</i>    | <i>Ca_Kabuli_Chr05</i>       | 33256245                       | (T/C)       |
| 8590        | CakSNP8590     | <i>Kabuli</i>    | <i>Ca_Kabuli_Chr05</i>       | 33256412                       | (A/T)       |
| 8591        | CakSNP8591     | <i>Kabuli</i>    | <i>Ca_Kabuli_Chr05</i>       | 33256388                       | (T/A)       |
| 8592        | CakSNP8592     | <i>Kabuli</i>    | <i>Ca_Kabuli_Chr05</i>       | 33336127                       | (C/G)       |
| 8593        | CakSNP8593     | <i>Kabuli</i>    | <i>Ca_Kabuli_Chr05</i>       | 33336135                       | (G/T)       |
| 8594        | CakSNP8594     | <i>Kabuli</i>    | <i>Ca_Kabuli_Chr05</i>       | 33349598                       | (C/T)       |
| 8595        | CakSNP8595     | <i>Kabuli</i>    | <i>Ca_Kabuli_Chr05</i>       | 33349700                       | (A/G)       |
| 8596        | CakSNP8596     | <i>Kabuli</i>    | <i>Ca_Kabuli_Chr05</i>       | 33379904                       | (A/G)       |
| 8597        | CakSNP8597     | <i>Kabuli</i>    | <i>Ca_Kabuli_Chr05</i>       | 33379873                       | (C/T)       |
| 8598        | CakSNP8598     | <i>Kabuli</i>    | <i>Ca_Kabuli_Chr05</i>       | 33381774                       | (C/T)       |
| 8599        | CakSNP8599     | <i>Kabuli</i>    | <i>Ca_Kabuli_Chr05</i>       | 33422813                       | (C/T)       |
| 8600        | CakSNP8600     | <i>Kabuli</i>    | <i>Ca_Kabuli_Chr05</i>       | 33422780                       | (A/G)       |
| 8601        | CakSNP8601     | <i>Kabuli</i>    | <i>Ca_Kabuli_Chr05</i>       | 33422779                       | (C/T)       |
| 8602        | CakSNP8602     | <i>Kabuli</i>    | <i>Ca_Kabuli_Chr05</i>       | 33422767                       | (T/C)       |
| 8603        | CakSNP8603     | <i>Kabuli</i>    | <i>Ca_Kabuli_Chr05</i>       | 33431897                       | (T/C)       |
| 8604        | CakSNP8604     | <i>Kabuli</i>    | <i>Ca_Kabuli_Chr05</i>       | 33431996                       | (T/C)       |
| 8605        | CakSNP8605     | <i>Kabuli</i>    | <i>Ca_Kabuli_Chr05</i>       | 33523676                       | (T/C)       |
| 8606        | CakSNP8606     | <i>Kabuli</i>    | <i>Ca_Kabuli_Chr05</i>       | 33523686                       | (G/A)       |
| 8607        | CakSNP8607     | <i>Kabuli</i>    | <i>Ca_Kabuli_Chr05</i>       | 33523691                       | (T/C)       |
| 8608        | CakSNP8608     | <i>Kabuli</i>    | <i>Ca_Kabuli_Chr05</i>       | 33532807                       | (A/G)       |
| 8609        | CakSNP8609     | <i>Kabuli</i>    | <i>Ca_Kabuli_Chr05</i>       | 33532804                       | (A/T)       |
| 8610        | CakSNP8610     | <i>Kabuli</i>    | <i>Ca_Kabuli_Chr05</i>       | 33532798                       | (A/T)       |
| 8611        | CakSNP8611     | <i>Kabuli</i>    | <i>Ca_Kabuli_Chr05</i>       | 33574726                       | (T/C)       |
| 8612        | CakSNP8612     | <i>Kabuli</i>    | <i>Ca_Kabuli_Chr05</i>       | 33578061                       | (T/A)       |
| 8613        | CakSNP8613     | <i>Kabuli</i>    | <i>Ca_Kabuli_Chr05</i>       | 33578167                       | (A/T)       |
| 8614        | CakSNP8614     | <i>Kabuli</i>    | <i>Ca_Kabuli_Chr05</i>       | 33578438                       | (T/C)       |
| 8615        | CakSNP8615     | <i>Kabuli</i>    | <i>Ca_Kabuli_Chr05</i>       | 33578477                       | (A/G)       |
| 8616        | CakSNP8616     | <i>Kabuli</i>    | <i>Ca_Kabuli_Chr05</i>       | 33581040                       | (A/G)       |
| 8617        | CakSNP8617     | <i>Kabuli</i>    | <i>Ca_Kabuli_Chr05</i>       | 33626841                       | (C/T)       |

| <b>S.N.</b> | <b>SNP IDs</b> | <b>Cultivars</b> | <b>Chromosomes/scaffolds</b> | <b>Physical positions (bp)</b> | <b>SNPs</b> |
|-------------|----------------|------------------|------------------------------|--------------------------------|-------------|
| 8618        | CakSNP8618     | <i>Kabuli</i>    | <i>Ca_Kabuli_Chr05</i>       | 33627132                       | (T/C)       |
| 8619        | CakSNP8619     | <i>Kabuli</i>    | <i>Ca_Kabuli_Chr05</i>       | 33631108                       | (A/G)       |
| 8620        | CakSNP8620     | <i>Kabuli</i>    | <i>Ca_Kabuli_Chr05</i>       | 33631266                       | (T/A)       |
| 8621        | CakSNP8621     | <i>Kabuli</i>    | <i>Ca_Kabuli_Chr05</i>       | 33656560                       | (C/G)       |
| 8622        | CakSNP8622     | <i>Kabuli</i>    | <i>Ca_Kabuli_Chr05</i>       | 33673894                       | (T/C)       |
| 8623        | CakSNP8623     | <i>Kabuli</i>    | <i>Ca_Kabuli_Chr05</i>       | 33700181                       | (G/C)       |
| 8624        | CakSNP8624     | <i>Kabuli</i>    | <i>Ca_Kabuli_Chr05</i>       | 33700196                       | (A/T)       |
| 8625        | CakSNP8625     | <i>Kabuli</i>    | <i>Ca_Kabuli_Chr05</i>       | 33721487                       | (C/T)       |
| 8626        | CakSNP8626     | <i>Kabuli</i>    | <i>Ca_Kabuli_Chr05</i>       | 33721544                       | (A/G)       |
| 8627        | CakSNP8627     | <i>Kabuli</i>    | <i>Ca_Kabuli_Chr05</i>       | 33771359                       | (T/C)       |
| 8628        | CakSNP8628     | <i>Kabuli</i>    | <i>Ca_Kabuli_Chr05</i>       | 33812108                       | (T/C)       |
| 8629        | CakSNP8629     | <i>Kabuli</i>    | <i>Ca_Kabuli_Chr05</i>       | 33812213                       | (A/C)       |
| 8630        | CakSNP8630     | <i>Kabuli</i>    | <i>Ca_Kabuli_Chr05</i>       | 33812363                       | (T/A)       |
| 8631        | CakSNP8631     | <i>Kabuli</i>    | <i>Ca_Kabuli_Chr05</i>       | 33818742                       | (T/A)       |
| 8632        | CakSNP8632     | <i>Kabuli</i>    | <i>Ca_Kabuli_Chr05</i>       | 33818789                       | (C/G)       |
| 8633        | CakSNP8633     | <i>Kabuli</i>    | <i>Ca_Kabuli_Chr05</i>       | 33818823                       | (A/G)       |
| 8634        | CakSNP8634     | <i>Kabuli</i>    | <i>Ca_Kabuli_Chr05</i>       | 33824516                       | (G/T)       |
| 8635        | CakSNP8635     | <i>Kabuli</i>    | <i>Ca_Kabuli_Chr05</i>       | 33824513                       | (G/A)       |
| 8636        | CakSNP8636     | <i>Kabuli</i>    | <i>Ca_Kabuli_Chr05</i>       | 33824503                       | (G/A)       |
| 8637        | CakSNP8637     | <i>Kabuli</i>    | <i>Ca_Kabuli_Chr05</i>       | 33835816                       | (T/C)       |
| 8638        | CakSNP8638     | <i>Kabuli</i>    | <i>Ca_Kabuli_Chr05</i>       | 33841544                       | (T/G)       |
| 8639        | CakSNP8639     | <i>Kabuli</i>    | <i>Ca_Kabuli_Chr05</i>       | 33844056                       | (A/T)       |
| 8640        | CakSNP8640     | <i>Kabuli</i>    | <i>Ca_Kabuli_Chr05</i>       | 33844059                       | (G/C)       |
| 8641        | CakSNP8641     | <i>Kabuli</i>    | <i>Ca_Kabuli_Chr05</i>       | 33844222                       | (T/C)       |
| 8642        | CakSNP8642     | <i>Kabuli</i>    | <i>Ca_Kabuli_Chr05</i>       | 33844436                       | (T/A)       |
| 8643        | CakSNP8643     | <i>Kabuli</i>    | <i>Ca_Kabuli_Chr05</i>       | 33892596                       | (A/C)       |
| 8644        | CakSNP8644     | <i>Kabuli</i>    | <i>Ca_Kabuli_Chr05</i>       | 33937307                       | (G/A)       |
| 8645        | CakSNP8645     | <i>Kabuli</i>    | <i>Ca_Kabuli_Chr05</i>       | 33937316                       | (G/A)       |
| 8646        | CakSNP8646     | <i>Kabuli</i>    | <i>Ca_Kabuli_Chr05</i>       | 33963525                       | (G/C)       |
| 8647        | CakSNP8647     | <i>Kabuli</i>    | <i>Ca_Kabuli_Chr05</i>       | 33985819                       | (A/G)       |
| 8648        | CakSNP8648     | <i>Kabuli</i>    | <i>Ca_Kabuli_Chr05</i>       | 33986234                       | (C/T)       |
| 8649        | CakSNP8649     | <i>Kabuli</i>    | <i>Ca_Kabuli_Chr05</i>       | 33986253                       | (A/C)       |
| 8650        | CakSNP8650     | <i>Kabuli</i>    | <i>Ca_Kabuli_Chr05</i>       | 34022362                       | (G/T)       |
| 8651        | CakSNP8651     | <i>Kabuli</i>    | <i>Ca_Kabuli_Chr05</i>       | 34040479                       | (A/G)       |
| 8652        | CakSNP8652     | <i>Kabuli</i>    | <i>Ca_Kabuli_Chr05</i>       | 34040508                       | (A/C)       |
| 8653        | CakSNP8653     | <i>Kabuli</i>    | <i>Ca_Kabuli_Chr05</i>       | 34040535                       | (G/A)       |
| 8654        | CakSNP8654     | <i>Kabuli</i>    | <i>Ca_Kabuli_Chr05</i>       | 34041705                       | (G/T)       |
| 8655        | CakSNP8655     | <i>Kabuli</i>    | <i>Ca_Kabuli_Chr05</i>       | 34073378                       | (A/T)       |
| 8656        | CakSNP8656     | <i>Kabuli</i>    | <i>Ca_Kabuli_Chr05</i>       | 34073395                       | (G/A)       |

| <b>S.N.</b> | <b>SNP IDs</b> | <b>Cultivars</b> | <b>Chromosomes/scaffolds</b> | <b>Physical positions (bp)</b> | <b>SNPs</b> |
|-------------|----------------|------------------|------------------------------|--------------------------------|-------------|
| 8657        | CakSNP8657     | <i>Kabuli</i>    | <i>Ca_Kabuli_Chr05</i>       | 34073445                       | (A/T)       |
| 8658        | CakSNP8658     | <i>Kabuli</i>    | <i>Ca_Kabuli_Chr05</i>       | 34201989                       | (C/G)       |
| 8659        | CakSNP8659     | <i>Kabuli</i>    | <i>Ca_Kabuli_Chr05</i>       | 34202000                       | (T/C)       |
| 8660        | CakSNP8660     | <i>Kabuli</i>    | <i>Ca_Kabuli_Chr05</i>       | 34202075                       | (T/G)       |
| 8661        | CakSNP8661     | <i>Kabuli</i>    | <i>Ca_Kabuli_Chr05</i>       | 34202222                       | (G/A)       |
| 8662        | CakSNP8662     | <i>Kabuli</i>    | <i>Ca_Kabuli_Chr05</i>       | 34241269                       | (C/G)       |
| 8663        | CakSNP8663     | <i>Kabuli</i>    | <i>Ca_Kabuli_Chr05</i>       | 34244499                       | (C/T)       |
| 8664        | CakSNP8664     | <i>Kabuli</i>    | <i>Ca_Kabuli_Chr05</i>       | 34244681                       | (G/A)       |
| 8665        | CakSNP8665     | <i>Kabuli</i>    | <i>Ca_Kabuli_Chr05</i>       | 34244670                       | (A/G)       |
| 8666        | CakSNP8666     | <i>Kabuli</i>    | <i>Ca_Kabuli_Chr05</i>       | 34244662                       | (C/G)       |
| 8667        | CakSNP8667     | <i>Kabuli</i>    | <i>Ca_Kabuli_Chr05</i>       | 34244754                       | (T/A)       |
| 8668        | CakSNP8668     | <i>Kabuli</i>    | <i>Ca_Kabuli_Chr05</i>       | 34313779                       | (A/G)       |
| 8669        | CakSNP8669     | <i>Kabuli</i>    | <i>Ca_Kabuli_Chr05</i>       | 34313758                       | (T/G)       |
| 8670        | CakSNP8670     | <i>Kabuli</i>    | <i>Ca_Kabuli_Chr05</i>       | 34334980                       | (A/G)       |
| 8671        | CakSNP8671     | <i>Kabuli</i>    | <i>Ca_Kabuli_Chr05</i>       | 34334993                       | (A/C)       |
| 8672        | CakSNP8672     | <i>Kabuli</i>    | <i>Ca_Kabuli_Chr05</i>       | 34335252                       | (T/A)       |
| 8673        | CakSNP8673     | <i>Kabuli</i>    | <i>Ca_Kabuli_Chr05</i>       | 34418798                       | (G/C)       |
| 8674        | CakSNP8674     | <i>Kabuli</i>    | <i>Ca_Kabuli_Chr05</i>       | 34441581                       | (A/C)       |
| 8675        | CakSNP8675     | <i>Kabuli</i>    | <i>Ca_Kabuli_Chr05</i>       | 34461159                       | (T/C)       |
| 8676        | CakSNP8676     | <i>Kabuli</i>    | <i>Ca_Kabuli_Chr05</i>       | 34482245                       | (G/T)       |
| 8677        | CakSNP8677     | <i>Kabuli</i>    | <i>Ca_Kabuli_Chr05</i>       | 34482217                       | (G/T)       |
| 8678        | CakSNP8678     | <i>Kabuli</i>    | <i>Ca_Kabuli_Chr05</i>       | 34511669                       | (G/T)       |
| 8679        | CakSNP8679     | <i>Kabuli</i>    | <i>Ca_Kabuli_Chr05</i>       | 34511678                       | (T/C)       |
| 8680        | CakSNP8680     | <i>Kabuli</i>    | <i>Ca_Kabuli_Chr05</i>       | 34511693                       | (C/T)       |
| 8681        | CakSNP8681     | <i>Kabuli</i>    | <i>Ca_Kabuli_Chr05</i>       | 34511705                       | (G/T)       |
| 8682        | CakSNP8682     | <i>Kabuli</i>    | <i>Ca_Kabuli_Chr05</i>       | 34521655                       | (T/C)       |
| 8683        | CakSNP8683     | <i>Kabuli</i>    | <i>Ca_Kabuli_Chr05</i>       | 34531222                       | (A/G)       |
| 8684        | CakSNP8684     | <i>Kabuli</i>    | <i>Ca_Kabuli_Chr05</i>       | 34535758                       | (T/C)       |
| 8685        | CakSNP8685     | <i>Kabuli</i>    | <i>Ca_Kabuli_Chr05</i>       | 34535893                       | (G/T)       |
| 8686        | CakSNP8686     | <i>Kabuli</i>    | <i>Ca_Kabuli_Chr05</i>       | 34535878                       | (G/A)       |
| 8687        | CakSNP8687     | <i>Kabuli</i>    | <i>Ca_Kabuli_Chr05</i>       | 34629028                       | (A/G)       |
| 8688        | CakSNP8688     | <i>Kabuli</i>    | <i>Ca_Kabuli_Chr05</i>       | 34673784                       | (T/A)       |
| 8689        | CakSNP8689     | <i>Kabuli</i>    | <i>Ca_Kabuli_Chr05</i>       | 34691234                       | (A/C)       |
| 8690        | CakSNP8690     | <i>Kabuli</i>    | <i>Ca_Kabuli_Chr05</i>       | 34691302                       | (T/C)       |
| 8691        | CakSNP8691     | <i>Kabuli</i>    | <i>Ca_Kabuli_Chr05</i>       | 34691453                       | (G/A)       |
| 8692        | CakSNP8692     | <i>Kabuli</i>    | <i>Ca_Kabuli_Chr05</i>       | 34807071                       | (C/T)       |
| 8693        | CakSNP8693     | <i>Kabuli</i>    | <i>Ca_Kabuli_Chr05</i>       | 34814216                       | (T/C)       |
| 8694        | CakSNP8694     | <i>Kabuli</i>    | <i>Ca_Kabuli_Chr05</i>       | 34824647                       | (C/G)       |
| 8695        | CakSNP8695     | <i>Kabuli</i>    | <i>Ca_Kabuli_Chr05</i>       | 34824749                       | (A/T)       |



| <b>S.N.</b> | <b>SNP IDs</b> | <b>Cultivars</b> | <b>Chromosomes/scaffolds</b> | <b>Physical positions (bp)</b> | <b>SNPs</b> |
|-------------|----------------|------------------|------------------------------|--------------------------------|-------------|
| 8696        | CakSNP8696     | <i>Kabuli</i>    | <i>Ca_Kabuli_Chr05</i>       | 34845398                       | (T/G)       |
| 8697        | CakSNP8697     | <i>Kabuli</i>    | <i>Ca_Kabuli_Chr05</i>       | 34879731                       | (A/G)       |
| 8698        | CakSNP8698     | <i>Kabuli</i>    | <i>Ca_Kabuli_Chr05</i>       | 34974615                       | (T/A)       |
| 8699        | CakSNP8699     | <i>Kabuli</i>    | <i>Ca_Kabuli_Chr05</i>       | 34974703                       | (C/T)       |
| 8700        | CakSNP8700     | <i>Kabuli</i>    | <i>Ca_Kabuli_Chr05</i>       | 34974795                       | (A/G)       |
| 8701        | CakSNP8701     | <i>Kabuli</i>    | <i>Ca_Kabuli_Chr05</i>       | 34975712                       | (T/A)       |
| 8702        | CakSNP8702     | <i>Kabuli</i>    | <i>Ca_Kabuli_Chr05</i>       | 34998725                       | (G/A)       |
| 8703        | CakSNP8703     | <i>Kabuli</i>    | <i>Ca_Kabuli_Chr05</i>       | 35126544                       | (A/C)       |
| 8704        | CakSNP8704     | <i>Kabuli</i>    | <i>Ca_Kabuli_Chr05</i>       | 35164295                       | (C/T)       |
| 8705        | CakSNP8705     | <i>Kabuli</i>    | <i>Ca_Kabuli_Chr05</i>       | 35191371                       | (C/G)       |
| 8706        | CakSNP8706     | <i>Kabuli</i>    | <i>Ca_Kabuli_Chr05</i>       | 35209511                       | (T/C)       |
| 8707        | CakSNP8707     | <i>Kabuli</i>    | <i>Ca_Kabuli_Chr05</i>       | 35213601                       | (C/T)       |
| 8708        | CakSNP8708     | <i>Kabuli</i>    | <i>Ca_Kabuli_Chr05</i>       | 35226049                       | (G/C)       |
| 8709        | CakSNP8709     | <i>Kabuli</i>    | <i>Ca_Kabuli_Chr05</i>       | 35290452                       | (A/G)       |
| 8710        | CakSNP8710     | <i>Kabuli</i>    | <i>Ca_Kabuli_Chr05</i>       | 35296135                       | (A/C)       |
| 8711        | CakSNP8711     | <i>Kabuli</i>    | <i>Ca_Kabuli_Chr05</i>       | 35330946                       | (G/A)       |
| 8712        | CakSNP8712     | <i>Kabuli</i>    | <i>Ca_Kabuli_Chr05</i>       | 35330995                       | (A/C)       |
| 8713        | CakSNP8713     | <i>Kabuli</i>    | <i>Ca_Kabuli_Chr05</i>       | 35340068                       | (A/G)       |
| 8714        | CakSNP8714     | <i>Kabuli</i>    | <i>Ca_Kabuli_Chr05</i>       | 35340065                       | (G/A)       |
| 8715        | CakSNP8715     | <i>Kabuli</i>    | <i>Ca_Kabuli_Chr05</i>       | 35374184                       | (G/A)       |
| 8716        | CakSNP8716     | <i>Kabuli</i>    | <i>Ca_Kabuli_Chr05</i>       | 35438327                       | (G/T)       |
| 8717        | CakSNP8717     | <i>Kabuli</i>    | <i>Ca_Kabuli_Chr05</i>       | 35495900                       | (T/A)       |
| 8718        | CakSNP8718     | <i>Kabuli</i>    | <i>Ca_Kabuli_Chr05</i>       | 35500751                       | (T/C)       |
| 8719        | CakSNP8719     | <i>Kabuli</i>    | <i>Ca_Kabuli_Chr05</i>       | 35534923                       | (T/A)       |
| 8720        | CakSNP8720     | <i>Kabuli</i>    | <i>Ca_Kabuli_Chr05</i>       | 35534897                       | (G/A)       |
| 8721        | CakSNP8721     | <i>Kabuli</i>    | <i>Ca_Kabuli_Chr05</i>       | 35540372                       | (T/C)       |
| 8722        | CakSNP8722     | <i>Kabuli</i>    | <i>Ca_Kabuli_Chr05</i>       | 35543648                       | (T/C)       |
| 8723        | CakSNP8723     | <i>Kabuli</i>    | <i>Ca_Kabuli_Chr05</i>       | 35554534                       | (C/A)       |
| 8724        | CakSNP8724     | <i>Kabuli</i>    | <i>Ca_Kabuli_Chr05</i>       | 35554593                       | (C/T)       |
| 8725        | CakSNP8725     | <i>Kabuli</i>    | <i>Ca_Kabuli_Chr05</i>       | 35555184                       | (A/G)       |
| 8726        | CakSNP8726     | <i>Kabuli</i>    | <i>Ca_Kabuli_Chr05</i>       | 35576495                       | (A/G)       |
| 8727        | CakSNP8727     | <i>Kabuli</i>    | <i>Ca_Kabuli_Chr05</i>       | 35617798                       | (A/C)       |
| 8728        | CakSNP8728     | <i>Kabuli</i>    | <i>Ca_Kabuli_Chr05</i>       | 35688558                       | (T/C)       |
| 8729        | CakSNP8729     | <i>Kabuli</i>    | <i>Ca_Kabuli_Chr05</i>       | 35690996                       | (G/A)       |
| 8730        | CakSNP8730     | <i>Kabuli</i>    | <i>Ca_Kabuli_Chr05</i>       | 35691581                       | (T/C)       |
| 8731        | CakSNP8731     | <i>Kabuli</i>    | <i>Ca_Kabuli_Chr05</i>       | 35715495                       | (C/T)       |
| 8732        | CakSNP8732     | <i>Kabuli</i>    | <i>Ca_Kabuli_Chr05</i>       | 35715550                       | (G/C)       |
| 8733        | CakSNP8733     | <i>Kabuli</i>    | <i>Ca_Kabuli_Chr05</i>       | 35715571                       | (A/C)       |
| 8734        | CakSNP8734     | <i>Kabuli</i>    | <i>Ca_Kabuli_Chr05</i>       | 35715563                       | (G/A)       |

| <b>S.N.</b> | <b>SNP IDs</b> | <b>Cultivars</b> | <b>Chromosomes/scaffolds</b> | <b>Physical positions (bp)</b> | <b>SNPs</b> |
|-------------|----------------|------------------|------------------------------|--------------------------------|-------------|
| 8735        | CakSNP8735     | <i>Kabuli</i>    | <i>Ca_Kabuli_Chr05</i>       | 35715548                       | (T/C)       |
| 8736        | CakSNP8736     | <i>Kabuli</i>    | <i>Ca_Kabuli_Chr05</i>       | 35773040                       | (C/A)       |
| 8737        | CakSNP8737     | <i>Kabuli</i>    | <i>Ca_Kabuli_Chr05</i>       | 35773044                       | (A/G)       |
| 8738        | CakSNP8738     | <i>Kabuli</i>    | <i>Ca_Kabuli_Chr05</i>       | 35775200                       | (T/C)       |
| 8739        | CakSNP8739     | <i>Kabuli</i>    | <i>Ca_Kabuli_Chr05</i>       | 35775191                       | (T/G)       |
| 8740        | CakSNP8740     | <i>Kabuli</i>    | <i>Ca_Kabuli_Chr05</i>       | 35775266                       | (G/A)       |
| 8741        | CakSNP8741     | <i>Kabuli</i>    | <i>Ca_Kabuli_Chr05</i>       | 35789373                       | (T/A)       |
| 8742        | CakSNP8742     | <i>Kabuli</i>    | <i>Ca_Kabuli_Chr05</i>       | 35789775                       | (A/G)       |
| 8743        | CakSNP8743     | <i>Kabuli</i>    | <i>Ca_Kabuli_Chr05</i>       | 35839230                       | (T/C)       |
| 8744        | CakSNP8744     | <i>Kabuli</i>    | <i>Ca_Kabuli_Chr05</i>       | 35839233                       | (G/A)       |
| 8745        | CakSNP8745     | <i>Kabuli</i>    | <i>Ca_Kabuli_Chr05</i>       | 35844295                       | (G/T)       |
| 8746        | CakSNP8746     | <i>Kabuli</i>    | <i>Ca_Kabuli_Chr05</i>       | 35845094                       | (G/A)       |
| 8747        | CakSNP8747     | <i>Kabuli</i>    | <i>Ca_Kabuli_Chr05</i>       | 35845780                       | (T/C)       |
| 8748        | CakSNP8748     | <i>Kabuli</i>    | <i>Ca_Kabuli_Chr05</i>       | 35845801                       | (T/C)       |
| 8749        | CakSNP8749     | <i>Kabuli</i>    | <i>Ca_Kabuli_Chr05</i>       | 35846404                       | (A/G)       |
| 8750        | CakSNP8750     | <i>Kabuli</i>    | <i>Ca_Kabuli_Chr05</i>       | 35868865                       | (G/A)       |
| 8751        | CakSNP8751     | <i>Kabuli</i>    | <i>Ca_Kabuli_Chr05</i>       | 35877505                       | (T/C)       |
| 8752        | CakSNP8752     | <i>Kabuli</i>    | <i>Ca_Kabuli_Chr05</i>       | 35926105                       | (T/C)       |
| 8753        | CakSNP8753     | <i>Kabuli</i>    | <i>Ca_Kabuli_Chr05</i>       | 35937904                       | (C/T)       |
| 8754        | CakSNP8754     | <i>Kabuli</i>    | <i>Ca_Kabuli_Chr05</i>       | 35937842                       | (G/T)       |
| 8755        | CakSNP8755     | <i>Kabuli</i>    | <i>Ca_Kabuli_Chr05</i>       | 35947574                       | (G/A)       |
| 8756        | CakSNP8756     | <i>Kabuli</i>    | <i>Ca_Kabuli_Chr05</i>       | 35954656                       | (T/C)       |
| 8757        | CakSNP8757     | <i>Kabuli</i>    | <i>Ca_Kabuli_Chr05</i>       | 35956534                       | (C/T)       |
| 8758        | CakSNP8758     | <i>Kabuli</i>    | <i>Ca_Kabuli_Chr05</i>       | 36012698                       | (C/G)       |
| 8759        | CakSNP8759     | <i>Kabuli</i>    | <i>Ca_Kabuli_Chr05</i>       | 36039365                       | (A/C)       |
| 8760        | CakSNP8760     | <i>Kabuli</i>    | <i>Ca_Kabuli_Chr05</i>       | 36128655                       | (G/T)       |
| 8761        | CakSNP8761     | <i>Kabuli</i>    | <i>Ca_Kabuli_Chr05</i>       | 36131156                       | (A/C)       |
| 8762        | CakSNP8762     | <i>Kabuli</i>    | <i>Ca_Kabuli_Chr05</i>       | 36217803                       | (C/T)       |
| 8763        | CakSNP8763     | <i>Kabuli</i>    | <i>Ca_Kabuli_Chr05</i>       | 36238656                       | (G/A)       |
| 8764        | CakSNP8764     | <i>Kabuli</i>    | <i>Ca_Kabuli_Chr05</i>       | 36238655                       | (G/C)       |
| 8765        | CakSNP8765     | <i>Kabuli</i>    | <i>Ca_Kabuli_Chr05</i>       | 36248568                       | (C/T)       |
| 8766        | CakSNP8766     | <i>Kabuli</i>    | <i>Ca_Kabuli_Chr05</i>       | 36292611                       | (C/G)       |
| 8767        | CakSNP8767     | <i>Kabuli</i>    | <i>Ca_Kabuli_Chr05</i>       | 36334569                       | (C/A)       |
| 8768        | CakSNP8768     | <i>Kabuli</i>    | <i>Ca_Kabuli_Chr05</i>       | 36334592                       | (C/T)       |
| 8769        | CakSNP8769     | <i>Kabuli</i>    | <i>Ca_Kabuli_Chr05</i>       | 36334625                       | (A/G)       |
| 8770        | CakSNP8770     | <i>Kabuli</i>    | <i>Ca_Kabuli_Chr05</i>       | 36338598                       | (A/C)       |
| 8771        | CakSNP8771     | <i>Kabuli</i>    | <i>Ca_Kabuli_Chr05</i>       | 36338658                       | (A/G)       |
| 8772        | CakSNP8772     | <i>Kabuli</i>    | <i>Ca_Kabuli_Chr05</i>       | 36397489                       | (A/C)       |
| 8773        | CakSNP8773     | <i>Kabuli</i>    | <i>Ca_Kabuli_Chr05</i>       | 36400943                       | (C/T)       |

| <b>S.N.</b> | <b>SNP IDs</b> | <b>Cultivars</b> | <b>Chromosomes/scaffolds</b> | <b>Physical positions (bp)</b> | <b>SNPs</b> |
|-------------|----------------|------------------|------------------------------|--------------------------------|-------------|
| 8774        | CakSNP8774     | Kabuli           | Ca_Kabuli_Ch05               | 36408701                       | (G/A)       |
| 8775        | CakSNP8775     | Kabuli           | Ca_Kabuli_Ch05               | 36408719                       | (G/A)       |
| 8776        | CakSNP8776     | Kabuli           | Ca_Kabuli_Ch05               | 36408724                       | (T/C)       |
| 8777        | CakSNP8777     | Kabuli           | Ca_Kabuli_Ch05               | 36408736                       | (C/A)       |
| 8778        | CakSNP8778     | Kabuli           | Ca_Kabuli_Ch05               | 36430677                       | (A/C)       |
| 8779        | CakSNP8779     | Kabuli           | Ca_Kabuli_Ch05               | 36441063                       | (C/T)       |
| 8780        | CakSNP8780     | Kabuli           | Ca_Kabuli_Ch05               | 36533996                       | (T/A)       |
| 8781        | CakSNP8781     | Kabuli           | Ca_Kabuli_Ch05               | 36534056                       | (G/C)       |
| 8782        | CakSNP8782     | Kabuli           | Ca_Kabuli_Ch05               | 36534057                       | (T/G)       |
| 8783        | CakSNP8783     | Kabuli           | Ca_Kabuli_Ch05               | 36534060                       | (G/A)       |
| 8784        | CakSNP8784     | Kabuli           | Ca_Kabuli_Ch05               | 36534063                       | (C/T)       |
| 8785        | CakSNP8785     | Kabuli           | Ca_Kabuli_Ch05               | 36534126                       | (A/G)       |
| 8786        | CakSNP8786     | Kabuli           | Ca_Kabuli_Ch05               | 36534110                       | (T/C)       |
| 8787        | CakSNP8787     | Kabuli           | Ca_Kabuli_Ch05               | 36566175                       | (G/A)       |
| 8788        | CakSNP8788     | Kabuli           | Ca_Kabuli_Ch05               | 36613610                       | (T/C)       |
| 8789        | CakSNP8789     | Kabuli           | Ca_Kabuli_Ch05               | 36619837                       | (A/G)       |
| 8790        | CakSNP8790     | Kabuli           | Ca_Kabuli_Ch05               | 36621872                       | (A/T)       |
| 8791        | CakSNP8791     | Kabuli           | Ca_Kabuli_Ch05               | 36672147                       | (C/T)       |
| 8792        | CakSNP8792     | Kabuli           | Ca_Kabuli_Ch05               | 36672164                       | (A/G)       |
| 8793        | CakSNP8793     | Kabuli           | Ca_Kabuli_Ch05               | 36673950                       | (C/A)       |
| 8794        | CakSNP8794     | Kabuli           | Ca_Kabuli_Ch05               | 36731961                       | (T/C)       |
| 8795        | CakSNP8795     | Kabuli           | Ca_Kabuli_Ch05               | 36735459                       | (A/T)       |
| 8796        | CakSNP8796     | Kabuli           | Ca_Kabuli_Ch05               | 36751625                       | (C/T)       |
| 8797        | CakSNP8797     | Kabuli           | Ca_Kabuli_Ch05               | 36751851                       | (T/A)       |
| 8798        | CakSNP8798     | Kabuli           | Ca_Kabuli_Ch05               | 36757408                       | (G/A)       |
| 8799        | CakSNP8799     | Kabuli           | Ca_Kabuli_Ch05               | 36797173                       | (A/G)       |
| 8800        | CakSNP8800     | Kabuli           | Ca_Kabuli_Ch05               | 36797187                       | (G/T)       |
| 8801        | CakSNP8801     | Kabuli           | Ca_Kabuli_Ch05               | 36800497                       | (G/T)       |
| 8802        | CakSNP8802     | Kabuli           | Ca_Kabuli_Ch05               | 36842784                       | (G/T)       |
| 8803        | CakSNP8803     | Kabuli           | Ca_Kabuli_Ch05               | 36855028                       | (G/A)       |
| 8804        | CakSNP8804     | Kabuli           | Ca_Kabuli_Ch05               | 36916560                       | (T/C)       |
| 8805        | CakSNP8805     | Kabuli           | Ca_Kabuli_Ch05               | 36999074                       | (G/C)       |
| 8806        | CakSNP8806     | Kabuli           | Ca_Kabuli_Ch05               | 37016704                       | (C/G)       |
| 8807        | CakSNP8807     | Kabuli           | Ca_Kabuli_Ch05               | 37039246                       | (A/T)       |
| 8808        | CakSNP8808     | Kabuli           | Ca_Kabuli_Ch05               | 37039300                       | (A/G)       |
| 8809        | CakSNP8809     | Kabuli           | Ca_Kabuli_Ch05               | 37040045                       | (G/A)       |
| 8810        | CakSNP8810     | Kabuli           | Ca_Kabuli_Ch05               | 37067293                       | (A/G)       |
| 8811        | CakSNP8811     | Kabuli           | Ca_Kabuli_Ch05               | 37067371                       | (T/C)       |
| 8812        | CakSNP8812     | Kabuli           | Ca_Kabuli_Ch05               | 37067384                       | (G/C)       |

| <b>S.N.</b> | <b>SNP IDs</b> | <b>Cultivars</b> | <b>Chromosomes/scaffolds</b> | <b>Physical positions (bp)</b> | <b>SNPs</b> |
|-------------|----------------|------------------|------------------------------|--------------------------------|-------------|
| 8813        | CakSNP8813     | <i>Kabuli</i>    | <i>Ca_Kabuli_Chr05</i>       | 37083276                       | (T/G)       |
| 8814        | CakSNP8814     | <i>Kabuli</i>    | <i>Ca_Kabuli_Chr05</i>       | 37083275                       | (G/T)       |
| 8815        | CakSNP8815     | <i>Kabuli</i>    | <i>Ca_Kabuli_Chr05</i>       | 37114574                       | (A/G)       |
| 8816        | CakSNP8816     | <i>Kabuli</i>    | <i>Ca_Kabuli_Chr05</i>       | 37126371                       | (A/G)       |
| 8817        | CakSNP8817     | <i>Kabuli</i>    | <i>Ca_Kabuli_Chr05</i>       | 37126354                       | (T/C)       |
| 8818        | CakSNP8818     | <i>Kabuli</i>    | <i>Ca_Kabuli_Chr05</i>       | 37147572                       | (C/T)       |
| 8819        | CakSNP8819     | <i>Kabuli</i>    | <i>Ca_Kabuli_Chr05</i>       | 37167061                       | (A/G)       |
| 8820        | CakSNP8820     | <i>Kabuli</i>    | <i>Ca_Kabuli_Chr05</i>       | 37167114                       | (A/T)       |
| 8821        | CakSNP8821     | <i>Kabuli</i>    | <i>Ca_Kabuli_Chr05</i>       | 37167108                       | (A/T)       |
| 8822        | CakSNP8822     | <i>Kabuli</i>    | <i>Ca_Kabuli_Chr05</i>       | 37194939                       | (G/A)       |
| 8823        | CakSNP8823     | <i>Kabuli</i>    | <i>Ca_Kabuli_Chr05</i>       | 37194917                       | (G/A)       |
| 8824        | CakSNP8824     | <i>Kabuli</i>    | <i>Ca_Kabuli_Chr05</i>       | 37197321                       | (C/A)       |
| 8825        | CakSNP8825     | <i>Kabuli</i>    | <i>Ca_Kabuli_Chr05</i>       | 37207821                       | (A/T)       |
| 8826        | CakSNP8826     | <i>Kabuli</i>    | <i>Ca_Kabuli_Chr05</i>       | 37207837                       | (G/T)       |
| 8827        | CakSNP8827     | <i>Kabuli</i>    | <i>Ca_Kabuli_Chr05</i>       | 37211645                       | (T/G)       |
| 8828        | CakSNP8828     | <i>Kabuli</i>    | <i>Ca_Kabuli_Chr05</i>       | 37213853                       | (C/T)       |
| 8829        | CakSNP8829     | <i>Kabuli</i>    | <i>Ca_Kabuli_Chr05</i>       | 37232307                       | (T/C)       |
| 8830        | CakSNP8830     | <i>Kabuli</i>    | <i>Ca_Kabuli_Chr05</i>       | 37254596                       | (A/G)       |
| 8831        | CakSNP8831     | <i>Kabuli</i>    | <i>Ca_Kabuli_Chr05</i>       | 37260601                       | (T/C)       |
| 8832        | CakSNP8832     | <i>Kabuli</i>    | <i>Ca_Kabuli_Chr05</i>       | 37274572                       | (C/T)       |
| 8833        | CakSNP8833     | <i>Kabuli</i>    | <i>Ca_Kabuli_Chr05</i>       | 37274583                       | (C/T)       |
| 8834        | CakSNP8834     | <i>Kabuli</i>    | <i>Ca_Kabuli_Chr05</i>       | 37274616                       | (C/G)       |
| 8835        | CakSNP8835     | <i>Kabuli</i>    | <i>Ca_Kabuli_Chr05</i>       | 37309917                       | (T/G)       |
| 8836        | CakSNP8836     | <i>Kabuli</i>    | <i>Ca_Kabuli_Chr05</i>       | 37309935                       | (T/G)       |
| 8837        | CakSNP8837     | <i>Kabuli</i>    | <i>Ca_Kabuli_Chr05</i>       | 37332101                       | (G/T)       |
| 8838        | CakSNP8838     | <i>Kabuli</i>    | <i>Ca_Kabuli_Chr05</i>       | 37332198                       | (G/A)       |
| 8839        | CakSNP8839     | <i>Kabuli</i>    | <i>Ca_Kabuli_Chr05</i>       | 37332304                       | (G/A)       |
| 8840        | CakSNP8840     | <i>Kabuli</i>    | <i>Ca_Kabuli_Chr05</i>       | 37332303                       | (A/C)       |
| 8841        | CakSNP8841     | <i>Kabuli</i>    | <i>Ca_Kabuli_Chr05</i>       | 37332370                       | (T/C)       |
| 8842        | CakSNP8842     | <i>Kabuli</i>    | <i>Ca_Kabuli_Chr05</i>       | 37332441                       | (T/C)       |
| 8843        | CakSNP8843     | <i>Kabuli</i>    | <i>Ca_Kabuli_Chr05</i>       | 37332501                       | (C/T)       |
| 8844        | CakSNP8844     | <i>Kabuli</i>    | <i>Ca_Kabuli_Chr05</i>       | 37339022                       | (T/G)       |
| 8845        | CakSNP8845     | <i>Kabuli</i>    | <i>Ca_Kabuli_Chr05</i>       | 37339358                       | (T/G)       |
| 8846        | CakSNP8846     | <i>Kabuli</i>    | <i>Ca_Kabuli_Chr05</i>       | 37339327                       | (A/G)       |
| 8847        | CakSNP8847     | <i>Kabuli</i>    | <i>Ca_Kabuli_Chr05</i>       | 37339300                       | (A/G)       |
| 8848        | CakSNP8848     | <i>Kabuli</i>    | <i>Ca_Kabuli_Chr05</i>       | 37342358                       | (G/T)       |
| 8849        | CakSNP8849     | <i>Kabuli</i>    | <i>Ca_Kabuli_Chr05</i>       | 37363626                       | (C/T)       |
| 8850        | CakSNP8850     | <i>Kabuli</i>    | <i>Ca_Kabuli_Chr05</i>       | 37375575                       | (C/G)       |
| 8851        | CakSNP8851     | <i>Kabuli</i>    | <i>Ca_Kabuli_Chr05</i>       | 37375620                       | (C/T)       |

| <b>S.N.</b> | <b>SNP IDs</b> | <b>Cultivars</b> | <b>Chromosomes/scaffolds</b> | <b>Physical positions (bp)</b> | <b>SNPs</b> |
|-------------|----------------|------------------|------------------------------|--------------------------------|-------------|
| 8852        | CakSNP8852     | <i>Kabuli</i>    | <i>Ca_Kabuli_Chr05</i>       | 37445226                       | (A/G)       |
| 8853        | CakSNP8853     | <i>Kabuli</i>    | <i>Ca_Kabuli_Chr05</i>       | 37460980                       | (A/G)       |
| 8854        | CakSNP8854     | <i>Kabuli</i>    | <i>Ca_Kabuli_Chr05</i>       | 37468727                       | (T/C)       |
| 8855        | CakSNP8855     | <i>Kabuli</i>    | <i>Ca_Kabuli_Chr05</i>       | 37468755                       | (G/A)       |
| 8856        | CakSNP8856     | <i>Kabuli</i>    | <i>Ca_Kabuli_Chr05</i>       | 37555816                       | (T/A)       |
| 8857        | CakSNP8857     | <i>Kabuli</i>    | <i>Ca_Kabuli_Chr05</i>       | 37555846                       | (T/A)       |
| 8858        | CakSNP8858     | <i>Kabuli</i>    | <i>Ca_Kabuli_Chr05</i>       | 37578999                       | (T/G)       |
| 8859        | CakSNP8859     | <i>Kabuli</i>    | <i>Ca_Kabuli_Chr05</i>       | 37591782                       | (A/T)       |
| 8860        | CakSNP8860     | <i>Kabuli</i>    | <i>Ca_Kabuli_Chr05</i>       | 37593444                       | (A/T)       |
| 8861        | CakSNP8861     | <i>Kabuli</i>    | <i>Ca_Kabuli_Chr05</i>       | 37594347                       | (T/C)       |
| 8862        | CakSNP8862     | <i>Kabuli</i>    | <i>Ca_Kabuli_Chr05</i>       | 37604030                       | (T/C)       |
| 8863        | CakSNP8863     | <i>Kabuli</i>    | <i>Ca_Kabuli_Chr05</i>       | 37604090                       | (G/T)       |
| 8864        | CakSNP8864     | <i>Kabuli</i>    | <i>Ca_Kabuli_Chr05</i>       | 37604780                       | (C/T)       |
| 8865        | CakSNP8865     | <i>Kabuli</i>    | <i>Ca_Kabuli_Chr05</i>       | 37796337                       | (T/G)       |
| 8866        | CakSNP8866     | <i>Kabuli</i>    | <i>Ca_Kabuli_Chr05</i>       | 37798313                       | (T/G)       |
| 8867        | CakSNP8867     | <i>Kabuli</i>    | <i>Ca_Kabuli_Chr05</i>       | 37868250                       | (C/T)       |
| 8868        | CakSNP8868     | <i>Kabuli</i>    | <i>Ca_Kabuli_Chr05</i>       | 37868256                       | (T/A)       |
| 8869        | CakSNP8869     | <i>Kabuli</i>    | <i>Ca_Kabuli_Chr05</i>       | 37869744                       | (T/C)       |
| 8870        | CakSNP8870     | <i>Kabuli</i>    | <i>Ca_Kabuli_Chr05</i>       | 37872223                       | (C/G)       |
| 8871        | CakSNP8871     | <i>Kabuli</i>    | <i>Ca_Kabuli_Chr05</i>       | 37874564                       | (T/A)       |
| 8872        | CakSNP8872     | <i>Kabuli</i>    | <i>Ca_Kabuli_Chr05</i>       | 37874725                       | (A/C)       |
| 8873        | CakSNP8873     | <i>Kabuli</i>    | <i>Ca_Kabuli_Chr05</i>       | 37874694                       | (C/T)       |
| 8874        | CakSNP8874     | <i>Kabuli</i>    | <i>Ca_Kabuli_Chr05</i>       | 37886417                       | (T/G)       |
| 8875        | CakSNP8875     | <i>Kabuli</i>    | <i>Ca_Kabuli_Chr05</i>       | 37899098                       | (T/C)       |
| 8876        | CakSNP8876     | <i>Kabuli</i>    | <i>Ca_Kabuli_Chr05</i>       | 37899238                       | (T/C)       |
| 8877        | CakSNP8877     | <i>Kabuli</i>    | <i>Ca_Kabuli_Chr05</i>       | 37908818                       | (A/C)       |
| 8878        | CakSNP8878     | <i>Kabuli</i>    | <i>Ca_Kabuli_Chr05</i>       | 37908807                       | (A/T)       |
| 8879        | CakSNP8879     | <i>Kabuli</i>    | <i>Ca_Kabuli_Chr05</i>       | 37911813                       | (A/C)       |
| 8880        | CakSNP8880     | <i>Kabuli</i>    | <i>Ca_Kabuli_Chr05</i>       | 38018552                       | (A/T)       |
| 8881        | CakSNP8881     | <i>Kabuli</i>    | <i>Ca_Kabuli_Chr05</i>       | 38018558                       | (G/C)       |
| 8882        | CakSNP8882     | <i>Kabuli</i>    | <i>Ca_Kabuli_Chr05</i>       | 38057582                       | (C/T)       |
| 8883        | CakSNP8883     | <i>Kabuli</i>    | <i>Ca_Kabuli_Chr05</i>       | 38080226                       | (A/G)       |
| 8884        | CakSNP8884     | <i>Kabuli</i>    | <i>Ca_Kabuli_Chr05</i>       | 38080349                       | (C/T)       |
| 8885        | CakSNP8885     | <i>Kabuli</i>    | <i>Ca_Kabuli_Chr05</i>       | 38092606                       | (G/A)       |
| 8886        | CakSNP8886     | <i>Kabuli</i>    | <i>Ca_Kabuli_Chr05</i>       | 38092619                       | (T/C)       |
| 8887        | CakSNP8887     | <i>Kabuli</i>    | <i>Ca_Kabuli_Chr05</i>       | 38092732                       | (C/T)       |
| 8888        | CakSNP8888     | <i>Kabuli</i>    | <i>Ca_Kabuli_Chr05</i>       | 38092735                       | (C/T)       |
| 8889        | CakSNP8889     | <i>Kabuli</i>    | <i>Ca_Kabuli_Chr05</i>       | 38092793                       | (C/T)       |
| 8890        | CakSNP8890     | <i>Kabuli</i>    | <i>Ca_Kabuli_Chr05</i>       | 38102941                       | (T/G)       |

| <b>S.N.</b> | <b>SNP IDs</b> | <b>Cultivars</b> | <b>Chromosomes/scaffolds</b> | <b>Physical positions (bp)</b> | <b>SNPs</b> |
|-------------|----------------|------------------|------------------------------|--------------------------------|-------------|
| 8891        | CakSNP8891     | <i>Kabuli</i>    | <i>Ca_Kabuli_Chr05</i>       | 38108396                       | (G/A)       |
| 8892        | CakSNP8892     | <i>Kabuli</i>    | <i>Ca_Kabuli_Chr05</i>       | 38110219                       | (T/G)       |
| 8893        | CakSNP8893     | <i>Kabuli</i>    | <i>Ca_Kabuli_Chr05</i>       | 38220843                       | (G/A)       |
| 8894        | CakSNP8894     | <i>Kabuli</i>    | <i>Ca_Kabuli_Chr05</i>       | 38220908                       | (G/T)       |
| 8895        | CakSNP8895     | <i>Kabuli</i>    | <i>Ca_Kabuli_Chr05</i>       | 38248895                       | (A/C)       |
| 8896        | CakSNP8896     | <i>Kabuli</i>    | <i>Ca_Kabuli_Chr05</i>       | 38249134                       | (T/C)       |
| 8897        | CakSNP8897     | <i>Kabuli</i>    | <i>Ca_Kabuli_Chr05</i>       | 38249132                       | (A/C)       |
| 8898        | CakSNP8898     | <i>Kabuli</i>    | <i>Ca_Kabuli_Chr05</i>       | 38266153                       | (G/A)       |
| 8899        | CakSNP8899     | <i>Kabuli</i>    | <i>Ca_Kabuli_Chr05</i>       | 38307036                       | (G/A)       |
| 8900        | CakSNP8900     | <i>Kabuli</i>    | <i>Ca_Kabuli_Chr05</i>       | 38333718                       | (C/T)       |
| 8901        | CakSNP8901     | <i>Kabuli</i>    | <i>Ca_Kabuli_Chr05</i>       | 38333746                       | (G/A)       |
| 8902        | CakSNP8902     | <i>Kabuli</i>    | <i>Ca_Kabuli_Chr05</i>       | 38333774                       | (A/G)       |
| 8903        | CakSNP8903     | <i>Kabuli</i>    | <i>Ca_Kabuli_Chr05</i>       | 38347201                       | (A/C)       |
| 8904        | CakSNP8904     | <i>Kabuli</i>    | <i>Ca_Kabuli_Chr05</i>       | 38455563                       | (A/C)       |
| 8905        | CakSNP8905     | <i>Kabuli</i>    | <i>Ca_Kabuli_Chr05</i>       | 38509657                       | (A/C)       |
| 8906        | CakSNP8906     | <i>Kabuli</i>    | <i>Ca_Kabuli_Chr05</i>       | 38538904                       | (A/G)       |
| 8907        | CakSNP8907     | <i>Kabuli</i>    | <i>Ca_Kabuli_Chr05</i>       | 38551438                       | (C/T)       |
| 8908        | CakSNP8908     | <i>Kabuli</i>    | <i>Ca_Kabuli_Chr05</i>       | 38551381                       | (G/A)       |
| 8909        | CakSNP8909     | <i>Kabuli</i>    | <i>Ca_Kabuli_Chr05</i>       | 38647040                       | (A/C)       |
| 8910        | CakSNP8910     | <i>Kabuli</i>    | <i>Ca_Kabuli_Chr05</i>       | 38656599                       | (C/T)       |
| 8911        | CakSNP8911     | <i>Kabuli</i>    | <i>Ca_Kabuli_Chr05</i>       | 38783604                       | (C/A)       |
| 8912        | CakSNP8912     | <i>Kabuli</i>    | <i>Ca_Kabuli_Chr05</i>       | 38784078                       | (G/A)       |
| 8913        | CakSNP8913     | <i>Kabuli</i>    | <i>Ca_Kabuli_Chr05</i>       | 38784074                       | (A/G)       |
| 8914        | CakSNP8914     | <i>Kabuli</i>    | <i>Ca_Kabuli_Chr05</i>       | 38784150                       | (T/A)       |
| 8915        | CakSNP8915     | <i>Kabuli</i>    | <i>Ca_Kabuli_Chr05</i>       | 38784129                       | (G/C)       |
| 8916        | CakSNP8916     | <i>Kabuli</i>    | <i>Ca_Kabuli_Chr05</i>       | 38857904                       | (T/C)       |
| 8917        | CakSNP8917     | <i>Kabuli</i>    | <i>Ca_Kabuli_Chr05</i>       | 38872143                       | (A/G)       |
| 8918        | CakSNP8918     | <i>Kabuli</i>    | <i>Ca_Kabuli_Chr05</i>       | 38892604                       | (A/C)       |
| 8919        | CakSNP8919     | <i>Kabuli</i>    | <i>Ca_Kabuli_Chr05</i>       | 38898971                       | (G/A)       |
| 8920        | CakSNP8920     | <i>Kabuli</i>    | <i>Ca_Kabuli_Chr05</i>       | 38909701                       | (C/T)       |
| 8921        | CakSNP8921     | <i>Kabuli</i>    | <i>Ca_Kabuli_Chr05</i>       | 38937304                       | (C/G)       |
| 8922        | CakSNP8922     | <i>Kabuli</i>    | <i>Ca_Kabuli_Chr05</i>       | 38937398                       | (C/A)       |
| 8923        | CakSNP8923     | <i>Kabuli</i>    | <i>Ca_Kabuli_Chr05</i>       | 38939578                       | (C/A)       |
| 8924        | CakSNP8924     | <i>Kabuli</i>    | <i>Ca_Kabuli_Chr05</i>       | 38984762                       | (A/G)       |
| 8925        | CakSNP8925     | <i>Kabuli</i>    | <i>Ca_Kabuli_Chr05</i>       | 38984769                       | (A/C)       |
| 8926        | CakSNP8926     | <i>Kabuli</i>    | <i>Ca_Kabuli_Chr05</i>       | 38984776                       | (A/G)       |
| 8927        | CakSNP8927     | <i>Kabuli</i>    | <i>Ca_Kabuli_Chr05</i>       | 39008980                       | (G/A)       |
| 8928        | CakSNP8928     | <i>Kabuli</i>    | <i>Ca_Kabuli_Chr05</i>       | 39137170                       | (A/G)       |
| 8929        | CakSNP8929     | <i>Kabuli</i>    | <i>Ca_Kabuli_Chr05</i>       | 39175007                       | (A/T)       |

| <b>S.N.</b> | <b>SNP IDs</b> | <b>Cultivars</b> | <b>Chromosomes/scaffolds</b> | <b>Physical positions (bp)</b> | <b>SNPs</b> |
|-------------|----------------|------------------|------------------------------|--------------------------------|-------------|
| 8930        | CakSNP8930     | <i>Kabuli</i>    | <i>Ca_Kabuli_Chr05</i>       | 39176391                       | (T/A)       |
| 8931        | CakSNP8931     | <i>Kabuli</i>    | <i>Ca_Kabuli_Chr05</i>       | 39266333                       | (T/C)       |
| 8932        | CakSNP8932     | <i>Kabuli</i>    | <i>Ca_Kabuli_Chr05</i>       | 39277581                       | (T/C)       |
| 8933        | CakSNP8933     | <i>Kabuli</i>    | <i>Ca_Kabuli_Chr05</i>       | 39283856                       | (G/A)       |
| 8934        | CakSNP8934     | <i>Kabuli</i>    | <i>Ca_Kabuli_Chr05</i>       | 39326933                       | (G/T)       |
| 8935        | CakSNP8935     | <i>Kabuli</i>    | <i>Ca_Kabuli_Chr05</i>       | 39353755                       | (T/G)       |
| 8936        | CakSNP8936     | <i>Kabuli</i>    | <i>Ca_Kabuli_Chr05</i>       | 39364522                       | (T/C)       |
| 8937        | CakSNP8937     | <i>Kabuli</i>    | <i>Ca_Kabuli_Chr05</i>       | 39364569                       | (G/A)       |
| 8938        | CakSNP8938     | <i>Kabuli</i>    | <i>Ca_Kabuli_Chr05</i>       | 39364571                       | (C/A)       |
| 8939        | CakSNP8939     | <i>Kabuli</i>    | <i>Ca_Kabuli_Chr05</i>       | 39364720                       | (A/T)       |
| 8940        | CakSNP8940     | <i>Kabuli</i>    | <i>Ca_Kabuli_Chr05</i>       | 39364700                       | (C/A)       |
| 8941        | CakSNP8941     | <i>Kabuli</i>    | <i>Ca_Kabuli_Chr05</i>       | 39364695                       | (A/C)       |
| 8942        | CakSNP8942     | <i>Kabuli</i>    | <i>Ca_Kabuli_Chr05</i>       | 39364667                       | (T/A)       |
| 8943        | CakSNP8943     | <i>Kabuli</i>    | <i>Ca_Kabuli_Chr05</i>       | 39364741                       | (A/T)       |
| 8944        | CakSNP8944     | <i>Kabuli</i>    | <i>Ca_Kabuli_Chr05</i>       | 39364752                       | (G/T)       |
| 8945        | CakSNP8945     | <i>Kabuli</i>    | <i>Ca_Kabuli_Chr05</i>       | 39364895                       | (A/C)       |
| 8946        | CakSNP8946     | <i>Kabuli</i>    | <i>Ca_Kabuli_Chr05</i>       | 39364856                       | (A/G)       |
| 8947        | CakSNP8947     | <i>Kabuli</i>    | <i>Ca_Kabuli_Chr05</i>       | 39364848                       | (C/T)       |
| 8948        | CakSNP8948     | <i>Kabuli</i>    | <i>Ca_Kabuli_Chr05</i>       | 39364841                       | (A/T)       |
| 8949        | CakSNP8949     | <i>Kabuli</i>    | <i>Ca_Kabuli_Chr05</i>       | 39366353                       | (C/G)       |
| 8950        | CakSNP8950     | <i>Kabuli</i>    | <i>Ca_Kabuli_Chr05</i>       | 39385603                       | (T/G)       |
| 8951        | CakSNP8951     | <i>Kabuli</i>    | <i>Ca_Kabuli_Chr05</i>       | 39385630                       | (C/T)       |
| 8952        | CakSNP8952     | <i>Kabuli</i>    | <i>Ca_Kabuli_Chr05</i>       | 39410377                       | (T/G)       |
| 8953        | CakSNP8953     | <i>Kabuli</i>    | <i>Ca_Kabuli_Chr05</i>       | 39410329                       | (T/G)       |
| 8954        | CakSNP8954     | <i>Kabuli</i>    | <i>Ca_Kabuli_Chr05</i>       | 39460567                       | (A/C)       |
| 8955        | CakSNP8955     | <i>Kabuli</i>    | <i>Ca_Kabuli_Chr05</i>       | 39475960                       | (T/C)       |
| 8956        | CakSNP8956     | <i>Kabuli</i>    | <i>Ca_Kabuli_Chr05</i>       | 39476040                       | (T/G)       |
| 8957        | CakSNP8957     | <i>Kabuli</i>    | <i>Ca_Kabuli_Chr05</i>       | 39498665                       | (G/A)       |
| 8958        | CakSNP8958     | <i>Kabuli</i>    | <i>Ca_Kabuli_Chr05</i>       | 39513563                       | (C/A)       |
| 8959        | CakSNP8959     | <i>Kabuli</i>    | <i>Ca_Kabuli_Chr05</i>       | 39543929                       | (C/T)       |
| 8960        | CakSNP8960     | <i>Kabuli</i>    | <i>Ca_Kabuli_Chr05</i>       | 39576823                       | (C/T)       |
| 8961        | CakSNP8961     | <i>Kabuli</i>    | <i>Ca_Kabuli_Chr05</i>       | 39576836                       | (T/A)       |
| 8962        | CakSNP8962     | <i>Kabuli</i>    | <i>Ca_Kabuli_Chr05</i>       | 39576839                       | (C/T)       |
| 8963        | CakSNP8963     | <i>Kabuli</i>    | <i>Ca_Kabuli_Chr05</i>       | 39576864                       | (C/A)       |
| 8964        | CakSNP8964     | <i>Kabuli</i>    | <i>Ca_Kabuli_Chr05</i>       | 39576870                       | (C/T)       |
| 8965        | CakSNP8965     | <i>Kabuli</i>    | <i>Ca_Kabuli_Chr05</i>       | 39576874                       | (G/T)       |
| 8966        | CakSNP8966     | <i>Kabuli</i>    | <i>Ca_Kabuli_Chr05</i>       | 39576841                       | (G/A)       |
| 8967        | CakSNP8967     | <i>Kabuli</i>    | <i>Ca_Kabuli_Chr05</i>       | 39592439                       | (A/G)       |
| 8968        | CakSNP8968     | <i>Kabuli</i>    | <i>Ca_Kabuli_Chr05</i>       | 39597485                       | (C/T)       |

| <b>S.N.</b> | <b>SNP IDs</b> | <b>Cultivars</b> | <b>Chromosomes/scaffolds</b> | <b>Physical positions (bp)</b> | <b>SNPs</b> |
|-------------|----------------|------------------|------------------------------|--------------------------------|-------------|
| 8969        | CakSNP8969     | <i>Kabuli</i>    | <i>Ca_Kabuli_Chr05</i>       | 39597459                       | (T/C)       |
| 8970        | CakSNP8970     | <i>Kabuli</i>    | <i>Ca_Kabuli_Chr05</i>       | 39608204                       | (A/G)       |
| 8971        | CakSNP8971     | <i>Kabuli</i>    | <i>Ca_Kabuli_Chr05</i>       | 39608209                       | (G/T)       |
| 8972        | CakSNP8972     | <i>Kabuli</i>    | <i>Ca_Kabuli_Chr05</i>       | 39684480                       | (A/G)       |
| 8973        | CakSNP8973     | <i>Kabuli</i>    | <i>Ca_Kabuli_Chr05</i>       | 39684592                       | (A/T)       |
| 8974        | CakSNP8974     | <i>Kabuli</i>    | <i>Ca_Kabuli_Chr05</i>       | 39713021                       | (G/A)       |
| 8975        | CakSNP8975     | <i>Kabuli</i>    | <i>Ca_Kabuli_Chr05</i>       | 39776794                       | (G/A)       |
| 8976        | CakSNP8976     | <i>Kabuli</i>    | <i>Ca_Kabuli_Chr05</i>       | 39776795                       | (G/A)       |
| 8977        | CakSNP8977     | <i>Kabuli</i>    | <i>Ca_Kabuli_Chr05</i>       | 39776818                       | (C/T)       |
| 8978        | CakSNP8978     | <i>Kabuli</i>    | <i>Ca_Kabuli_Chr05</i>       | 39776850                       | (G/A)       |
| 8979        | CakSNP8979     | <i>Kabuli</i>    | <i>Ca_Kabuli_Chr05</i>       | 39776869                       | (C/T)       |
| 8980        | CakSNP8980     | <i>Kabuli</i>    | <i>Ca_Kabuli_Chr05</i>       | 39794718                       | (C/T)       |
| 8981        | CakSNP8981     | <i>Kabuli</i>    | <i>Ca_Kabuli_Chr05</i>       | 39851570                       | (T/G)       |
| 8982        | CakSNP8982     | <i>Kabuli</i>    | <i>Ca_Kabuli_Chr05</i>       | 39869398                       | (C/T)       |
| 8983        | CakSNP8983     | <i>Kabuli</i>    | <i>Ca_Kabuli_Chr05</i>       | 39943298                       | (C/T)       |
| 8984        | CakSNP8984     | <i>Kabuli</i>    | <i>Ca_Kabuli_Chr05</i>       | 39985042                       | (G/A)       |
| 8985        | CakSNP8985     | <i>Kabuli</i>    | <i>Ca_Kabuli_Chr05</i>       | 39985332                       | (A/G)       |
| 8986        | CakSNP8986     | <i>Kabuli</i>    | <i>Ca_Kabuli_Chr05</i>       | 40018264                       | (A/C)       |
| 8987        | CakSNP8987     | <i>Kabuli</i>    | <i>Ca_Kabuli_Chr05</i>       | 40020062                       | (C/T)       |
| 8988        | CakSNP8988     | <i>Kabuli</i>    | <i>Ca_Kabuli_Chr05</i>       | 40020073                       | (C/G)       |
| 8989        | CakSNP8989     | <i>Kabuli</i>    | <i>Ca_Kabuli_Chr05</i>       | 40025250                       | (G/A)       |
| 8990        | CakSNP8990     | <i>Kabuli</i>    | <i>Ca_Kabuli_Chr05</i>       | 40025319                       | (T/C)       |
| 8991        | CakSNP8991     | <i>Kabuli</i>    | <i>Ca_Kabuli_Chr05</i>       | 40025326                       | (C/T)       |
| 8992        | CakSNP8992     | <i>Kabuli</i>    | <i>Ca_Kabuli_Chr05</i>       | 40025376                       | (A/G)       |
| 8993        | CakSNP8993     | <i>Kabuli</i>    | <i>Ca_Kabuli_Chr05</i>       | 40025377                       | (T/A)       |
| 8994        | CakSNP8994     | <i>Kabuli</i>    | <i>Ca_Kabuli_Chr05</i>       | 40027707                       | (A/G)       |
| 8995        | CakSNP8995     | <i>Kabuli</i>    | <i>Ca_Kabuli_Chr05</i>       | 40078085                       | (C/G)       |
| 8996        | CakSNP8996     | <i>Kabuli</i>    | <i>Ca_Kabuli_Chr05</i>       | 40078077                       | (A/G)       |
| 8997        | CakSNP8997     | <i>Kabuli</i>    | <i>Ca_Kabuli_Chr05</i>       | 40159260                       | (C/A)       |
| 8998        | CakSNP8998     | <i>Kabuli</i>    | <i>Ca_Kabuli_Chr05</i>       | 40159348                       | (G/A)       |
| 8999        | CakSNP8999     | <i>Kabuli</i>    | <i>Ca_Kabuli_Chr05</i>       | 40162755                       | (T/C)       |
| 9000        | CakSNP9000     | <i>Kabuli</i>    | <i>Ca_Kabuli_Chr05</i>       | 40162995                       | (C/T)       |
| 9001        | CakSNP9001     | <i>Kabuli</i>    | <i>Ca_Kabuli_Chr05</i>       | 40164176                       | (C/G)       |
| 9002        | CakSNP9002     | <i>Kabuli</i>    | <i>Ca_Kabuli_Chr05</i>       | 40239397                       | (G/C)       |
| 9003        | CakSNP9003     | <i>Kabuli</i>    | <i>Ca_Kabuli_Chr05</i>       | 40290082                       | (G/A)       |
| 9004        | CakSNP9004     | <i>Kabuli</i>    | <i>Ca_Kabuli_Chr05</i>       | 40290066                       | (A/G)       |
| 9005        | CakSNP9005     | <i>Kabuli</i>    | <i>Ca_Kabuli_Chr05</i>       | 40404136                       | (C/T)       |
| 9006        | CakSNP9006     | <i>Kabuli</i>    | <i>Ca_Kabuli_Chr05</i>       | 40404105                       | (G/C)       |
| 9007        | CakSNP9007     | <i>Kabuli</i>    | <i>Ca_Kabuli_Chr05</i>       | 40410891                       | (C/A)       |



| <b>S.N.</b> | <b>SNP IDs</b> | <b>Cultivars</b> | <b>Chromosomes/scaffolds</b> | <b>Physical positions (bp)</b> | <b>SNPs</b> |
|-------------|----------------|------------------|------------------------------|--------------------------------|-------------|
| 9008        | CakSNP9008     | <i>Kabuli</i>    | <i>Ca_Kabuli_Chr05</i>       | 40410895                       | (G/T)       |
| 9009        | CakSNP9009     | <i>Kabuli</i>    | <i>Ca_Kabuli_Chr05</i>       | 40411325                       | (G/C)       |
| 9010        | CakSNP9010     | <i>Kabuli</i>    | <i>Ca_Kabuli_Chr05</i>       | 40464608                       | (A/G)       |
| 9011        | CakSNP9011     | <i>Kabuli</i>    | <i>Ca_Kabuli_Chr05</i>       | 40505498                       | (T/G)       |
| 9012        | CakSNP9012     | <i>Kabuli</i>    | <i>Ca_Kabuli_Chr05</i>       | 40507018                       | (T/A)       |
| 9013        | CakSNP9013     | <i>Kabuli</i>    | <i>Ca_Kabuli_Chr05</i>       | 40507107                       | (A/G)       |
| 9014        | CakSNP9014     | <i>Kabuli</i>    | <i>Ca_Kabuli_Chr05</i>       | 40507116                       | (A/G)       |
| 9015        | CakSNP9015     | <i>Kabuli</i>    | <i>Ca_Kabuli_Chr05</i>       | 40507158                       | (A/G)       |
| 9016        | CakSNP9016     | <i>Kabuli</i>    | <i>Ca_Kabuli_Chr05</i>       | 40507653                       | (G/C)       |
| 9017        | CakSNP9017     | <i>Kabuli</i>    | <i>Ca_Kabuli_Chr05</i>       | 40507662                       | (C/T)       |
| 9018        | CakSNP9018     | <i>Kabuli</i>    | <i>Ca_Kabuli_Chr05</i>       | 40507683                       | (G/T)       |
| 9019        | CakSNP9019     | <i>Kabuli</i>    | <i>Ca_Kabuli_Chr05</i>       | 40532435                       | (A/G)       |
| 9020        | CakSNP9020     | <i>Kabuli</i>    | <i>Ca_Kabuli_Chr05</i>       | 40543989                       | (G/T)       |
| 9021        | CakSNP9021     | <i>Kabuli</i>    | <i>Ca_Kabuli_Chr05</i>       | 40553279                       | (C/G)       |
| 9022        | CakSNP9022     | <i>Kabuli</i>    | <i>Ca_Kabuli_Chr05</i>       | 40631069                       | (G/C)       |
| 9023        | CakSNP9023     | <i>Kabuli</i>    | <i>Ca_Kabuli_Chr05</i>       | 40666160                       | (T/A)       |
| 9024        | CakSNP9024     | <i>Kabuli</i>    | <i>Ca_Kabuli_Chr05</i>       | 40666171                       | (T/C)       |
| 9025        | CakSNP9025     | <i>Kabuli</i>    | <i>Ca_Kabuli_Chr05</i>       | 40666174                       | (C/T)       |
| 9026        | CakSNP9026     | <i>Kabuli</i>    | <i>Ca_Kabuli_Chr05</i>       | 40673241                       | (A/G)       |
| 9027        | CakSNP9027     | <i>Kabuli</i>    | <i>Ca_Kabuli_Chr05</i>       | 40700278                       | (C/G)       |
| 9028        | CakSNP9028     | <i>Kabuli</i>    | <i>Ca_Kabuli_Chr05</i>       | 40700260                       | (T/C)       |
| 9029        | CakSNP9029     | <i>Kabuli</i>    | <i>Ca_Kabuli_Chr05</i>       | 40700318                       | (C/A)       |
| 9030        | CakSNP9030     | <i>Kabuli</i>    | <i>Ca_Kabuli_Chr05</i>       | 40700772                       | (C/T)       |
| 9031        | CakSNP9031     | <i>Kabuli</i>    | <i>Ca_Kabuli_Chr05</i>       | 40736291                       | (C/G)       |
| 9032        | CakSNP9032     | <i>Kabuli</i>    | <i>Ca_Kabuli_Chr05</i>       | 40828566                       | (A/C)       |
| 9033        | CakSNP9033     | <i>Kabuli</i>    | <i>Ca_Kabuli_Chr05</i>       | 40828567                       | (G/C)       |
| 9034        | CakSNP9034     | <i>Kabuli</i>    | <i>Ca_Kabuli_Chr05</i>       | 40841690                       | (C/T)       |
| 9035        | CakSNP9035     | <i>Kabuli</i>    | <i>Ca_Kabuli_Chr05</i>       | 40845320                       | (C/T)       |
| 9036        | CakSNP9036     | <i>Kabuli</i>    | <i>Ca_Kabuli_Chr05</i>       | 40883438                       | (C/A)       |
| 9037        | CakSNP9037     | <i>Kabuli</i>    | <i>Ca_Kabuli_Chr05</i>       | 40955055                       | (A/T)       |
| 9038        | CakSNP9038     | <i>Kabuli</i>    | <i>Ca_Kabuli_Chr05</i>       | 40966058                       | (G/A)       |
| 9039        | CakSNP9039     | <i>Kabuli</i>    | <i>Ca_Kabuli_Chr05</i>       | 41024079                       | (A/G)       |
| 9040        | CakSNP9040     | <i>Kabuli</i>    | <i>Ca_Kabuli_Chr05</i>       | 41024135                       | (C/G)       |
| 9041        | CakSNP9041     | <i>Kabuli</i>    | <i>Ca_Kabuli_Chr05</i>       | 41024201                       | (G/A)       |
| 9042        | CakSNP9042     | <i>Kabuli</i>    | <i>Ca_Kabuli_Chr05</i>       | 41054578                       | (A/G)       |
| 9043        | CakSNP9043     | <i>Kabuli</i>    | <i>Ca_Kabuli_Chr05</i>       | 41055111                       | (T/A)       |
| 9044        | CakSNP9044     | <i>Kabuli</i>    | <i>Ca_Kabuli_Chr05</i>       | 41063657                       | (C/T)       |
| 9045        | CakSNP9045     | <i>Kabuli</i>    | <i>Ca_Kabuli_Chr05</i>       | 41066644                       | (C/G)       |
| 9046        | CakSNP9046     | <i>Kabuli</i>    | <i>Ca_Kabuli_Chr05</i>       | 41066664                       | (T/C)       |

| <b>S.N.</b> | <b>SNP IDs</b> | <b>Cultivars</b> | <b>Chromosomes/scaffolds</b> | <b>Physical positions (bp)</b> | <b>SNPs</b> |
|-------------|----------------|------------------|------------------------------|--------------------------------|-------------|
| 9047        | CakSNP9047     | <i>Kabuli</i>    | <i>Ca_Kabuli_Chr05</i>       | 41066667                       | (C/A)       |
| 9048        | CakSNP9048     | <i>Kabuli</i>    | <i>Ca_Kabuli_Chr05</i>       | 41080035                       | (C/T)       |
| 9049        | CakSNP9049     | <i>Kabuli</i>    | <i>Ca_Kabuli_Chr05</i>       | 41191566                       | (A/T)       |
| 9050        | CakSNP9050     | <i>Kabuli</i>    | <i>Ca_Kabuli_Chr05</i>       | 41191676                       | (G/C)       |
| 9051        | CakSNP9051     | <i>Kabuli</i>    | <i>Ca_Kabuli_Chr05</i>       | 41197909                       | (A/T)       |
| 9052        | CakSNP9052     | <i>Kabuli</i>    | <i>Ca_Kabuli_Chr05</i>       | 41203594                       | (C/T)       |
| 9053        | CakSNP9053     | <i>Kabuli</i>    | <i>Ca_Kabuli_Chr05</i>       | 41253742                       | (A/G)       |
| 9054        | CakSNP9054     | <i>Kabuli</i>    | <i>Ca_Kabuli_Chr05</i>       | 41283253                       | (T/C)       |
| 9055        | CakSNP9055     | <i>Kabuli</i>    | <i>Ca_Kabuli_Chr05</i>       | 41283453                       | (A/C)       |
| 9056        | CakSNP9056     | <i>Kabuli</i>    | <i>Ca_Kabuli_Chr05</i>       | 41285223                       | (A/C)       |
| 9057        | CakSNP9057     | <i>Kabuli</i>    | <i>Ca_Kabuli_Chr05</i>       | 41302544                       | (C/G)       |
| 9058        | CakSNP9058     | <i>Kabuli</i>    | <i>Ca_Kabuli_Chr05</i>       | 41302601                       | (G/A)       |
| 9059        | CakSNP9059     | <i>Kabuli</i>    | <i>Ca_Kabuli_Chr05</i>       | 41302733                       | (T/C)       |
| 9060        | CakSNP9060     | <i>Kabuli</i>    | <i>Ca_Kabuli_Chr05</i>       | 41302804                       | (A/G)       |
| 9061        | CakSNP9061     | <i>Kabuli</i>    | <i>Ca_Kabuli_Chr05</i>       | 41302859                       | (C/A)       |
| 9062        | CakSNP9062     | <i>Kabuli</i>    | <i>Ca_Kabuli_Chr05</i>       | 41302901                       | (C/A)       |
| 9063        | CakSNP9063     | <i>Kabuli</i>    | <i>Ca_Kabuli_Chr05</i>       | 41302900                       | (T/A)       |
| 9064        | CakSNP9064     | <i>Kabuli</i>    | <i>Ca_Kabuli_Chr05</i>       | 41302895                       | (G/A)       |
| 9065        | CakSNP9065     | <i>Kabuli</i>    | <i>Ca_Kabuli_Chr05</i>       | 41304103                       | (G/A)       |
| 9066        | CakSNP9066     | <i>Kabuli</i>    | <i>Ca_Kabuli_Chr05</i>       | 41399241                       | (C/T)       |
| 9067        | CakSNP9067     | <i>Kabuli</i>    | <i>Ca_Kabuli_Chr05</i>       | 41407077                       | (A/C)       |
| 9068        | CakSNP9068     | <i>Kabuli</i>    | <i>Ca_Kabuli_Chr05</i>       | 41407253                       | (T/C)       |
| 9069        | CakSNP9069     | <i>Kabuli</i>    | <i>Ca_Kabuli_Chr05</i>       | 41519141                       | (C/T)       |
| 9070        | CakSNP9070     | <i>Kabuli</i>    | <i>Ca_Kabuli_Chr05</i>       | 41521854                       | (T/G)       |
| 9071        | CakSNP9071     | <i>Kabuli</i>    | <i>Ca_Kabuli_Chr05</i>       | 41526026                       | (T/G)       |
| 9072        | CakSNP9072     | <i>Kabuli</i>    | <i>Ca_Kabuli_Chr05</i>       | 41635262                       | (C/T)       |
| 9073        | CakSNP9073     | <i>Kabuli</i>    | <i>Ca_Kabuli_Chr05</i>       | 41678144                       | (C/T)       |
| 9074        | CakSNP9074     | <i>Kabuli</i>    | <i>Ca_Kabuli_Chr05</i>       | 41696426                       | (T/C)       |
| 9075        | CakSNP9075     | <i>Kabuli</i>    | <i>Ca_Kabuli_Chr05</i>       | 41696496                       | (G/C)       |
| 9076        | CakSNP9076     | <i>Kabuli</i>    | <i>Ca_Kabuli_Chr05</i>       | 41701479                       | (T/C)       |
| 9077        | CakSNP9077     | <i>Kabuli</i>    | <i>Ca_Kabuli_Chr05</i>       | 41772759                       | (G/A)       |
| 9078        | CakSNP9078     | <i>Kabuli</i>    | <i>Ca_Kabuli_Chr05</i>       | 41887214                       | (A/T)       |
| 9079        | CakSNP9079     | <i>Kabuli</i>    | <i>Ca_Kabuli_Chr05</i>       | 41902419                       | (A/C)       |
| 9080        | CakSNP9080     | <i>Kabuli</i>    | <i>Ca_Kabuli_Chr05</i>       | 41945316                       | (A/G)       |
| 9081        | CakSNP9081     | <i>Kabuli</i>    | <i>Ca_Kabuli_Chr05</i>       | 41945373                       | (C/T)       |
| 9082        | CakSNP9082     | <i>Kabuli</i>    | <i>Ca_Kabuli_Chr05</i>       | 41945308                       | (G/A)       |
| 9083        | CakSNP9083     | <i>Kabuli</i>    | <i>Ca_Kabuli_Chr05</i>       | 41974690                       | (T/C)       |
| 9084        | CakSNP9084     | <i>Kabuli</i>    | <i>Ca_Kabuli_Chr05</i>       | 42004600                       | (T/G)       |
| 9085        | CakSNP9085     | <i>Kabuli</i>    | <i>Ca_Kabuli_Chr05</i>       | 42004602                       | (A/G)       |

| <b>S.N.</b> | <b>SNP IDs</b> | <b>Cultivars</b> | <b>Chromosomes/scaffolds</b> | <b>Physical positions (bp)</b> | <b>SNPs</b> |
|-------------|----------------|------------------|------------------------------|--------------------------------|-------------|
| 9086        | CakSNP9086     | <i>Kabuli</i>    | <i>Ca_Kabuli_Chr05</i>       | 42004734                       | (G/A)       |
| 9087        | CakSNP9087     | <i>Kabuli</i>    | <i>Ca_Kabuli_Chr05</i>       | 42004742                       | (G/A)       |
| 9088        | CakSNP9088     | <i>Kabuli</i>    | <i>Ca_Kabuli_Chr05</i>       | 42004751                       | (G/A)       |
| 9089        | CakSNP9089     | <i>Kabuli</i>    | <i>Ca_Kabuli_Chr05</i>       | 42004753                       | (C/A)       |
| 9090        | CakSNP9090     | <i>Kabuli</i>    | <i>Ca_Kabuli_Chr05</i>       | 42008626                       | (A/C)       |
| 9091        | CakSNP9091     | <i>Kabuli</i>    | <i>Ca_Kabuli_Chr05</i>       | 42012972                       | (C/A)       |
| 9092        | CakSNP9092     | <i>Kabuli</i>    | <i>Ca_Kabuli_Chr05</i>       | 42012983                       | (G/A)       |
| 9093        | CakSNP9093     | <i>Kabuli</i>    | <i>Ca_Kabuli_Chr05</i>       | 42012998                       | (C/T)       |
| 9094        | CakSNP9094     | <i>Kabuli</i>    | <i>Ca_Kabuli_Chr05</i>       | 42020435                       | (A/G)       |
| 9095        | CakSNP9095     | <i>Kabuli</i>    | <i>Ca_Kabuli_Chr05</i>       | 42100070                       | (A/G)       |
| 9096        | CakSNP9096     | <i>Kabuli</i>    | <i>Ca_Kabuli_Chr05</i>       | 42117516                       | (C/T)       |
| 9097        | CakSNP9097     | <i>Kabuli</i>    | <i>Ca_Kabuli_Chr05</i>       | 42120698                       | (T/C)       |
| 9098        | CakSNP9098     | <i>Kabuli</i>    | <i>Ca_Kabuli_Chr05</i>       | 42120735                       | (G/C)       |
| 9099        | CakSNP9099     | <i>Kabuli</i>    | <i>Ca_Kabuli_Chr05</i>       | 42121472                       | (C/A)       |
| 9100        | CakSNP9100     | <i>Kabuli</i>    | <i>Ca_Kabuli_Chr05</i>       | 42225634                       | (G/A)       |
| 9101        | CakSNP9101     | <i>Kabuli</i>    | <i>Ca_Kabuli_Chr05</i>       | 42275523                       | (G/A)       |
| 9102        | CakSNP9102     | <i>Kabuli</i>    | <i>Ca_Kabuli_Chr05</i>       | 42282297                       | (G/A)       |
| 9103        | CakSNP9103     | <i>Kabuli</i>    | <i>Ca_Kabuli_Chr05</i>       | 42413430                       | (A/C)       |
| 9104        | CakSNP9104     | <i>Kabuli</i>    | <i>Ca_Kabuli_Chr05</i>       | 42422867                       | (C/A)       |
| 9105        | CakSNP9105     | <i>Kabuli</i>    | <i>Ca_Kabuli_Chr05</i>       | 42422845                       | (T/C)       |
| 9106        | CakSNP9106     | <i>Kabuli</i>    | <i>Ca_Kabuli_Chr05</i>       | 42422837                       | (G/A)       |
| 9107        | CakSNP9107     | <i>Kabuli</i>    | <i>Ca_Kabuli_Chr05</i>       | 42422808                       | (A/G)       |
| 9108        | CakSNP9108     | <i>Kabuli</i>    | <i>Ca_Kabuli_Chr05</i>       | 42422932                       | (C/A)       |
| 9109        | CakSNP9109     | <i>Kabuli</i>    | <i>Ca_Kabuli_Chr05</i>       | 42435263                       | (C/T)       |
| 9110        | CakSNP9110     | <i>Kabuli</i>    | <i>Ca_Kabuli_Chr05</i>       | 42436972                       | (A/G)       |
| 9111        | CakSNP9111     | <i>Kabuli</i>    | <i>Ca_Kabuli_Chr05</i>       | 42436976                       | (A/T)       |
| 9112        | CakSNP9112     | <i>Kabuli</i>    | <i>Ca_Kabuli_Chr05</i>       | 42443786                       | (A/G)       |
| 9113        | CakSNP9113     | <i>Kabuli</i>    | <i>Ca_Kabuli_Chr05</i>       | 42477712                       | (G/A)       |
| 9114        | CakSNP9114     | <i>Kabuli</i>    | <i>Ca_Kabuli_Chr05</i>       | 42485130                       | (T/C)       |
| 9115        | CakSNP9115     | <i>Kabuli</i>    | <i>Ca_Kabuli_Chr05</i>       | 42528744                       | (T/G)       |
| 9116        | CakSNP9116     | <i>Kabuli</i>    | <i>Ca_Kabuli_Chr05</i>       | 42528934                       | (A/G)       |
| 9117        | CakSNP9117     | <i>Kabuli</i>    | <i>Ca_Kabuli_Chr05</i>       | 42540675                       | (A/T)       |
| 9118        | CakSNP9118     | <i>Kabuli</i>    | <i>Ca_Kabuli_Chr05</i>       | 42582262                       | (T/A)       |
| 9119        | CakSNP9119     | <i>Kabuli</i>    | <i>Ca_Kabuli_Chr05</i>       | 42655824                       | (A/G)       |
| 9120        | CakSNP9120     | <i>Kabuli</i>    | <i>Ca_Kabuli_Chr05</i>       | 42749499                       | (C/T)       |
| 9121        | CakSNP9121     | <i>Kabuli</i>    | <i>Ca_Kabuli_Chr05</i>       | 42792635                       | (G/A)       |
| 9122        | CakSNP9122     | <i>Kabuli</i>    | <i>Ca_Kabuli_Chr05</i>       | 42814621                       | (C/T)       |
| 9123        | CakSNP9123     | <i>Kabuli</i>    | <i>Ca_Kabuli_Chr05</i>       | 42814623                       | (A/G)       |
| 9124        | CakSNP9124     | <i>Kabuli</i>    | <i>Ca_Kabuli_Chr05</i>       | 42857977                       | (G/C)       |

| <b>S.N.</b> | <b>SNP IDs</b> | <b>Cultivars</b> | <b>Chromosomes/scaffolds</b> | <b>Physical positions (bp)</b> | <b>SNPs</b> |
|-------------|----------------|------------------|------------------------------|--------------------------------|-------------|
| 9125        | CakSNP9125     | <i>Kabuli</i>    | <i>Ca_Kabuli_Chr05</i>       | 42863366                       | (C/T)       |
| 9126        | CakSNP9126     | <i>Kabuli</i>    | <i>Ca_Kabuli_Chr05</i>       | 42872074                       | (A/C)       |
| 9127        | CakSNP9127     | <i>Kabuli</i>    | <i>Ca_Kabuli_Chr05</i>       | 42872091                       | (A/G)       |
| 9128        | CakSNP9128     | <i>Kabuli</i>    | <i>Ca_Kabuli_Chr05</i>       | 42881185                       | (C/T)       |
| 9129        | CakSNP9129     | <i>Kabuli</i>    | <i>Ca_Kabuli_Chr05</i>       | 42882945                       | (C/T)       |
| 9130        | CakSNP9130     | <i>Kabuli</i>    | <i>Ca_Kabuli_Chr05</i>       | 42882965                       | (C/T)       |
| 9131        | CakSNP9131     | <i>Kabuli</i>    | <i>Ca_Kabuli_Chr05</i>       | 42883163                       | (T/C)       |
| 9132        | CakSNP9132     | <i>Kabuli</i>    | <i>Ca_Kabuli_Chr05</i>       | 42910653                       | (A/G)       |
| 9133        | CakSNP9133     | <i>Kabuli</i>    | <i>Ca_Kabuli_Chr05</i>       | 42910661                       | (A/G)       |
| 9134        | CakSNP9134     | <i>Kabuli</i>    | <i>Ca_Kabuli_Chr05</i>       | 42910732                       | (A/T)       |
| 9135        | CakSNP9135     | <i>Kabuli</i>    | <i>Ca_Kabuli_Chr05</i>       | 42924113                       | (C/T)       |
| 9136        | CakSNP9136     | <i>Kabuli</i>    | <i>Ca_Kabuli_Chr05</i>       | 42928986                       | (T/G)       |
| 9137        | CakSNP9137     | <i>Kabuli</i>    | <i>Ca_Kabuli_Chr05</i>       | 42929087                       | (A/C)       |
| 9138        | CakSNP9138     | <i>Kabuli</i>    | <i>Ca_Kabuli_Chr05</i>       | 42946580                       | (T/C)       |
| 9139        | CakSNP9139     | <i>Kabuli</i>    | <i>Ca_Kabuli_Chr05</i>       | 42946716                       | (A/T)       |
| 9140        | CakSNP9140     | <i>Kabuli</i>    | <i>Ca_Kabuli_Chr05</i>       | 42999704                       | (C/T)       |
| 9141        | CakSNP9141     | <i>Kabuli</i>    | <i>Ca_Kabuli_Chr05</i>       | 43000210                       | (A/G)       |
| 9142        | CakSNP9142     | <i>Kabuli</i>    | <i>Ca_Kabuli_Chr05</i>       | 43034618                       | (T/A)       |
| 9143        | CakSNP9143     | <i>Kabuli</i>    | <i>Ca_Kabuli_Chr05</i>       | 43037863                       | (G/A)       |
| 9144        | CakSNP9144     | <i>Kabuli</i>    | <i>Ca_Kabuli_Chr05</i>       | 43060091                       | (C/T)       |
| 9145        | CakSNP9145     | <i>Kabuli</i>    | <i>Ca_Kabuli_Chr05</i>       | 43067894                       | (T/C)       |
| 9146        | CakSNP9146     | <i>Kabuli</i>    | <i>Ca_Kabuli_Chr05</i>       | 43067891                       | (G/C)       |
| 9147        | CakSNP9147     | <i>Kabuli</i>    | <i>Ca_Kabuli_Chr05</i>       | 43067905                       | (A/C)       |
| 9148        | CakSNP9148     | <i>Kabuli</i>    | <i>Ca_Kabuli_Chr05</i>       | 43080493                       | (G/A)       |
| 9149        | CakSNP9149     | <i>Kabuli</i>    | <i>Ca_Kabuli_Chr05</i>       | 43081783                       | (G/A)       |
| 9150        | CakSNP9150     | <i>Kabuli</i>    | <i>Ca_Kabuli_Chr05</i>       | 43110660                       | (G/A)       |
| 9151        | CakSNP9151     | <i>Kabuli</i>    | <i>Ca_Kabuli_Chr05</i>       | 43110669                       | (A/T)       |
| 9152        | CakSNP9152     | <i>Kabuli</i>    | <i>Ca_Kabuli_Chr05</i>       | 43110726                       | (T/G)       |
| 9153        | CakSNP9153     | <i>Kabuli</i>    | <i>Ca_Kabuli_Chr05</i>       | 43110737                       | (A/G)       |
| 9154        | CakSNP9154     | <i>Kabuli</i>    | <i>Ca_Kabuli_Chr05</i>       | 43175781                       | (G/A)       |
| 9155        | CakSNP9155     | <i>Kabuli</i>    | <i>Ca_Kabuli_Chr05</i>       | 43188824                       | (T/G)       |
| 9156        | CakSNP9156     | <i>Kabuli</i>    | <i>Ca_Kabuli_Chr05</i>       | 43188853                       | (C/A)       |
| 9157        | CakSNP9157     | <i>Kabuli</i>    | <i>Ca_Kabuli_Chr05</i>       | 43210793                       | (T/C)       |
| 9158        | CakSNP9158     | <i>Kabuli</i>    | <i>Ca_Kabuli_Chr05</i>       | 43212083                       | (G/A)       |
| 9159        | CakSNP9159     | <i>Kabuli</i>    | <i>Ca_Kabuli_Chr05</i>       | 43212066                       | (C/T)       |
| 9160        | CakSNP9160     | <i>Kabuli</i>    | <i>Ca_Kabuli_Chr05</i>       | 43221125                       | (T/C)       |
| 9161        | CakSNP9161     | <i>Kabuli</i>    | <i>Ca_Kabuli_Chr05</i>       | 43231220                       | (T/C)       |
| 9162        | CakSNP9162     | <i>Kabuli</i>    | <i>Ca_Kabuli_Chr05</i>       | 43231265                       | (C/T)       |
| 9163        | CakSNP9163     | <i>Kabuli</i>    | <i>Ca_Kabuli_Chr05</i>       | 43253586                       | (C/A)       |

| <b>S.N.</b> | <b>SNP IDs</b> | <b>Cultivars</b> | <b>Chromosomes/scaffolds</b> | <b>Physical positions (bp)</b> | <b>SNPs</b> |
|-------------|----------------|------------------|------------------------------|--------------------------------|-------------|
| 9164        | CakSNP9164     | <i>Kabuli</i>    | <i>Ca_Kabuli_Chr05</i>       | 43275472                       | (T/C)       |
| 9165        | CakSNP9165     | <i>Kabuli</i>    | <i>Ca_Kabuli_Chr05</i>       | 43334903                       | (T/C)       |
| 9166        | CakSNP9166     | <i>Kabuli</i>    | <i>Ca_Kabuli_Chr05</i>       | 43341646                       | (A/C)       |
| 9167        | CakSNP9167     | <i>Kabuli</i>    | <i>Ca_Kabuli_Chr05</i>       | 43402230                       | (C/T)       |
| 9168        | CakSNP9168     | <i>Kabuli</i>    | <i>Ca_Kabuli_Chr05</i>       | 43410326                       | (T/G)       |
| 9169        | CakSNP9169     | <i>Kabuli</i>    | <i>Ca_Kabuli_Chr05</i>       | 43423593                       | (G/C)       |
| 9170        | CakSNP9170     | <i>Kabuli</i>    | <i>Ca_Kabuli_Chr05</i>       | 43521774                       | (A/T)       |
| 9171        | CakSNP9171     | <i>Kabuli</i>    | <i>Ca_Kabuli_Chr05</i>       | 43521789                       | (G/A)       |
| 9172        | CakSNP9172     | <i>Kabuli</i>    | <i>Ca_Kabuli_Chr05</i>       | 43521830                       | (T/C)       |
| 9173        | CakSNP9173     | <i>Kabuli</i>    | <i>Ca_Kabuli_Chr05</i>       | 43521851                       | (G/A)       |
| 9174        | CakSNP9174     | <i>Kabuli</i>    | <i>Ca_Kabuli_Chr05</i>       | 43523560                       | (A/G)       |
| 9175        | CakSNP9175     | <i>Kabuli</i>    | <i>Ca_Kabuli_Chr05</i>       | 43530567                       | (C/T)       |
| 9176        | CakSNP9176     | <i>Kabuli</i>    | <i>Ca_Kabuli_Chr05</i>       | 43565712                       | (T/C)       |
| 9177        | CakSNP9177     | <i>Kabuli</i>    | <i>Ca_Kabuli_Chr05</i>       | 43632249                       | (C/A)       |
| 9178        | CakSNP9178     | <i>Kabuli</i>    | <i>Ca_Kabuli_Chr05</i>       | 43632281                       | (C/G)       |
| 9179        | CakSNP9179     | <i>Kabuli</i>    | <i>Ca_Kabuli_Chr05</i>       | 43632349                       | (T/A)       |
| 9180        | CakSNP9180     | <i>Kabuli</i>    | <i>Ca_Kabuli_Chr05</i>       | 43632400                       | (A/G)       |
| 9181        | CakSNP9181     | <i>Kabuli</i>    | <i>Ca_Kabuli_Chr05</i>       | 43632377                       | (C/T)       |
| 9182        | CakSNP9182     | <i>Kabuli</i>    | <i>Ca_Kabuli_Chr05</i>       | 43632481                       | (G/T)       |
| 9183        | CakSNP9183     | <i>Kabuli</i>    | <i>Ca_Kabuli_Chr05</i>       | 43632508                       | (A/G)       |
| 9184        | CakSNP9184     | <i>Kabuli</i>    | <i>Ca_Kabuli_Chr05</i>       | 43710359                       | (T/G)       |
| 9185        | CakSNP9185     | <i>Kabuli</i>    | <i>Ca_Kabuli_Chr05</i>       | 43710362                       | (A/T)       |
| 9186        | CakSNP9186     | <i>Kabuli</i>    | <i>Ca_Kabuli_Chr05</i>       | 43710366                       | (G/T)       |
| 9187        | CakSNP9187     | <i>Kabuli</i>    | <i>Ca_Kabuli_Chr05</i>       | 43710391                       | (A/G)       |
| 9188        | CakSNP9188     | <i>Kabuli</i>    | <i>Ca_Kabuli_Chr05</i>       | 43742448                       | (C/T)       |
| 9189        | CakSNP9189     | <i>Kabuli</i>    | <i>Ca_Kabuli_Chr05</i>       | 43742456                       | (G/A)       |
| 9190        | CakSNP9190     | <i>Kabuli</i>    | <i>Ca_Kabuli_Chr05</i>       | 43755074                       | (A/G)       |
| 9191        | CakSNP9191     | <i>Kabuli</i>    | <i>Ca_Kabuli_Chr05</i>       | 43755756                       | (A/G)       |
| 9192        | CakSNP9192     | <i>Kabuli</i>    | <i>Ca_Kabuli_Chr05</i>       | 43759059                       | (A/C)       |
| 9193        | CakSNP9193     | <i>Kabuli</i>    | <i>Ca_Kabuli_Chr05</i>       | 43786883                       | (A/G)       |
| 9194        | CakSNP9194     | <i>Kabuli</i>    | <i>Ca_Kabuli_Chr05</i>       | 43789875                       | (C/G)       |
| 9195        | CakSNP9195     | <i>Kabuli</i>    | <i>Ca_Kabuli_Chr05</i>       | 43790108                       | (G/A)       |
| 9196        | CakSNP9196     | <i>Kabuli</i>    | <i>Ca_Kabuli_Chr05</i>       | 43812119                       | (G/A)       |
| 9197        | CakSNP9197     | <i>Kabuli</i>    | <i>Ca_Kabuli_Chr05</i>       | 43812213                       | (C/T)       |
| 9198        | CakSNP9198     | <i>Kabuli</i>    | <i>Ca_Kabuli_Chr05</i>       | 43859301                       | (G/A)       |
| 9199        | CakSNP9199     | <i>Kabuli</i>    | <i>Ca_Kabuli_Chr05</i>       | 43904489                       | (T/A)       |
| 9200        | CakSNP9200     | <i>Kabuli</i>    | <i>Ca_Kabuli_Chr05</i>       | 43919009                       | (C/T)       |
| 9201        | CakSNP9201     | <i>Kabuli</i>    | <i>Ca_Kabuli_Chr05</i>       | 43919017                       | (T/G)       |
| 9202        | CakSNP9202     | <i>Kabuli</i>    | <i>Ca_Kabuli_Chr05</i>       | 43919022                       | (G/C)       |

| <b>S.N.</b> | <b>SNP IDs</b> | <b>Cultivars</b> | <b>Chromosomes/scaffolds</b> | <b>Physical positions (bp)</b> | <b>SNPs</b> |
|-------------|----------------|------------------|------------------------------|--------------------------------|-------------|
| 9203        | CakSNP9203     | <i>Kabuli</i>    | <i>Ca_Kabuli_Chr05</i>       | 43919028                       | (A/G)       |
| 9204        | CakSNP9204     | <i>Kabuli</i>    | <i>Ca_Kabuli_Chr05</i>       | 43982994                       | (C/T)       |
| 9205        | CakSNP9205     | <i>Kabuli</i>    | <i>Ca_Kabuli_Chr05</i>       | 43995843                       | (T/C)       |
| 9206        | CakSNP9206     | <i>Kabuli</i>    | <i>Ca_Kabuli_Chr05</i>       | 44002824                       | (T/G)       |
| 9207        | CakSNP9207     | <i>Kabuli</i>    | <i>Ca_Kabuli_Chr05</i>       | 44002862                       | (C/A)       |
| 9208        | CakSNP9208     | <i>Kabuli</i>    | <i>Ca_Kabuli_Chr05</i>       | 44038229                       | (T/C)       |
| 9209        | CakSNP9209     | <i>Kabuli</i>    | <i>Ca_Kabuli_Chr05</i>       | 44064495                       | (G/A)       |
| 9210        | CakSNP9210     | <i>Kabuli</i>    | <i>Ca_Kabuli_Chr05</i>       | 44080450                       | (G/C)       |
| 9211        | CakSNP9211     | <i>Kabuli</i>    | <i>Ca_Kabuli_Chr05</i>       | 44109260                       | (G/T)       |
| 9212        | CakSNP9212     | <i>Kabuli</i>    | <i>Ca_Kabuli_Chr05</i>       | 44154671                       | (A/G)       |
| 9213        | CakSNP9213     | <i>Kabuli</i>    | <i>Ca_Kabuli_Chr05</i>       | 44159237                       | (C/G)       |
| 9214        | CakSNP9214     | <i>Kabuli</i>    | <i>Ca_Kabuli_Chr05</i>       | 44289612                       | (T/C)       |
| 9215        | CakSNP9215     | <i>Kabuli</i>    | <i>Ca_Kabuli_Chr05</i>       | 44334286                       | (C/G)       |
| 9216        | CakSNP9216     | <i>Kabuli</i>    | <i>Ca_Kabuli_Chr05</i>       | 44334318                       | (C/T)       |
| 9217        | CakSNP9217     | <i>Kabuli</i>    | <i>Ca_Kabuli_Chr05</i>       | 44364134                       | (C/T)       |
| 9218        | CakSNP9218     | <i>Kabuli</i>    | <i>Ca_Kabuli_Chr05</i>       | 44373968                       | (G/T)       |
| 9219        | CakSNP9219     | <i>Kabuli</i>    | <i>Ca_Kabuli_Chr05</i>       | 44378178                       | (C/A)       |
| 9220        | CakSNP9220     | <i>Kabuli</i>    | <i>Ca_Kabuli_Chr05</i>       | 44428965                       | (G/A)       |
| 9221        | CakSNP9221     | <i>Kabuli</i>    | <i>Ca_Kabuli_Chr05</i>       | 44461250                       | (A/G)       |
| 9222        | CakSNP9222     | <i>Kabuli</i>    | <i>Ca_Kabuli_Chr05</i>       | 44491489                       | (G/T)       |
| 9223        | CakSNP9223     | <i>Kabuli</i>    | <i>Ca_Kabuli_Chr05</i>       | 44555718                       | (A/C)       |
| 9224        | CakSNP9224     | <i>Kabuli</i>    | <i>Ca_Kabuli_Chr05</i>       | 44561095                       | (T/C)       |
| 9225        | CakSNP9225     | <i>Kabuli</i>    | <i>Ca_Kabuli_Chr05</i>       | 44656921                       | (G/A)       |
| 9226        | CakSNP9226     | <i>Kabuli</i>    | <i>Ca_Kabuli_Chr05</i>       | 44667285                       | (C/T)       |
| 9227        | CakSNP9227     | <i>Kabuli</i>    | <i>Ca_Kabuli_Chr05</i>       | 44667297                       | (C/T)       |
| 9228        | CakSNP9228     | <i>Kabuli</i>    | <i>Ca_Kabuli_Chr05</i>       | 44667359                       | (C/A)       |
| 9229        | CakSNP9229     | <i>Kabuli</i>    | <i>Ca_Kabuli_Chr05</i>       | 44760403                       | (A/G)       |
| 9230        | CakSNP9230     | <i>Kabuli</i>    | <i>Ca_Kabuli_Chr05</i>       | 44760347                       | (G/T)       |
| 9231        | CakSNP9231     | <i>Kabuli</i>    | <i>Ca_Kabuli_Chr05</i>       | 44760469                       | (C/T)       |
| 9232        | CakSNP9232     | <i>Kabuli</i>    | <i>Ca_Kabuli_Chr05</i>       | 44760490                       | (C/A)       |
| 9233        | CakSNP9233     | <i>Kabuli</i>    | <i>Ca_Kabuli_Chr05</i>       | 44772326                       | (G/A)       |
| 9234        | CakSNP9234     | <i>Kabuli</i>    | <i>Ca_Kabuli_Chr05</i>       | 44884779                       | (G/C)       |
| 9235        | CakSNP9235     | <i>Kabuli</i>    | <i>Ca_Kabuli_Chr05</i>       | 44887105                       | (T/G)       |
| 9236        | CakSNP9236     | <i>Kabuli</i>    | <i>Ca_Kabuli_Chr05</i>       | 44887241                       | (T/C)       |
| 9237        | CakSNP9237     | <i>Kabuli</i>    | <i>Ca_Kabuli_Chr05</i>       | 44887234                       | (A/C)       |
| 9238        | CakSNP9238     | <i>Kabuli</i>    | <i>Ca_Kabuli_Chr05</i>       | 44891426                       | (G/C)       |
| 9239        | CakSNP9239     | <i>Kabuli</i>    | <i>Ca_Kabuli_Chr05</i>       | 44911842                       | (C/T)       |
| 9240        | CakSNP9240     | <i>Kabuli</i>    | <i>Ca_Kabuli_Chr05</i>       | 44911868                       | (C/G)       |
| 9241        | CakSNP9241     | <i>Kabuli</i>    | <i>Ca_Kabuli_Chr05</i>       | 44911881                       | (G/A)       |

| <b>S.N.</b> | <b>SNP IDs</b> | <b>Cultivars</b> | <b>Chromosomes/scaffolds</b> | <b>Physical positions (bp)</b> | <b>SNPs</b> |
|-------------|----------------|------------------|------------------------------|--------------------------------|-------------|
| 9242        | CakSNP9242     | <i>Kabuli</i>    | <i>Ca_Kabuli_Chr05</i>       | 44911906                       | (C/T)       |
| 9243        | CakSNP9243     | <i>Kabuli</i>    | <i>Ca_Kabuli_Chr05</i>       | 44918947                       | (C/A)       |
| 9244        | CakSNP9244     | <i>Kabuli</i>    | <i>Ca_Kabuli_Chr05</i>       | 44938814                       | (A/T)       |
| 9245        | CakSNP9245     | <i>Kabuli</i>    | <i>Ca_Kabuli_Chr05</i>       | 44938832                       | (A/G)       |
| 9246        | CakSNP9246     | <i>Kabuli</i>    | <i>Ca_Kabuli_Chr05</i>       | 44939058                       | (C/G)       |
| 9247        | CakSNP9247     | <i>Kabuli</i>    | <i>Ca_Kabuli_Chr05</i>       | 44939033                       | (G/A)       |
| 9248        | CakSNP9248     | <i>Kabuli</i>    | <i>Ca_Kabuli_Chr05</i>       | 45087170                       | (G/A)       |
| 9249        | CakSNP9249     | <i>Kabuli</i>    | <i>Ca_Kabuli_Chr05</i>       | 45087156                       | (A/G)       |
| 9250        | CakSNP9250     | <i>Kabuli</i>    | <i>Ca_Kabuli_Chr05</i>       | 45087146                       | (C/G)       |
| 9251        | CakSNP9251     | <i>Kabuli</i>    | <i>Ca_Kabuli_Chr05</i>       | 45087140                       | (C/A)       |
| 9252        | CakSNP9252     | <i>Kabuli</i>    | <i>Ca_Kabuli_Chr05</i>       | 45087202                       | (G/C)       |
| 9253        | CakSNP9253     | <i>Kabuli</i>    | <i>Ca_Kabuli_Chr05</i>       | 45087267                       | (A/G)       |
| 9254        | CakSNP9254     | <i>Kabuli</i>    | <i>Ca_Kabuli_Chr05</i>       | 45087228                       | (A/C)       |
| 9255        | CakSNP9255     | <i>Kabuli</i>    | <i>Ca_Kabuli_Chr05</i>       | 45087215                       | (G/A)       |
| 9256        | CakSNP9256     | <i>Kabuli</i>    | <i>Ca_Kabuli_Chr05</i>       | 45215617                       | (G/A)       |
| 9257        | CakSNP9257     | <i>Kabuli</i>    | <i>Ca_Kabuli_Chr05</i>       | 45219125                       | (C/T)       |
| 9258        | CakSNP9258     | <i>Kabuli</i>    | <i>Ca_Kabuli_Chr05</i>       | 45219258                       | (G/T)       |
| 9259        | CakSNP9259     | <i>Kabuli</i>    | <i>Ca_Kabuli_Chr05</i>       | 45219355                       | (T/G)       |
| 9260        | CakSNP9260     | <i>Kabuli</i>    | <i>Ca_Kabuli_Chr05</i>       | 45254102                       | (C/T)       |
| 9261        | CakSNP9261     | <i>Kabuli</i>    | <i>Ca_Kabuli_Chr05</i>       | 45254112                       | (T/G)       |
| 9262        | CakSNP9262     | <i>Kabuli</i>    | <i>Ca_Kabuli_Chr05</i>       | 45301772                       | (T/G)       |
| 9263        | CakSNP9263     | <i>Kabuli</i>    | <i>Ca_Kabuli_Chr05</i>       | 45337274                       | (C/G)       |
| 9264        | CakSNP9264     | <i>Kabuli</i>    | <i>Ca_Kabuli_Chr05</i>       | 45337307                       | (C/T)       |
| 9265        | CakSNP9265     | <i>Kabuli</i>    | <i>Ca_Kabuli_Chr05</i>       | 45406853                       | (C/T)       |
| 9266        | CakSNP9266     | <i>Kabuli</i>    | <i>Ca_Kabuli_Chr05</i>       | 45407063                       | (G/A)       |
| 9267        | CakSNP9267     | <i>Kabuli</i>    | <i>Ca_Kabuli_Chr05</i>       | 45407044                       | (A/C)       |
| 9268        | CakSNP9268     | <i>Kabuli</i>    | <i>Ca_Kabuli_Chr05</i>       | 45414089                       | (C/G)       |
| 9269        | CakSNP9269     | <i>Kabuli</i>    | <i>Ca_Kabuli_Chr05</i>       | 45428229                       | (A/G)       |
| 9270        | CakSNP9270     | <i>Kabuli</i>    | <i>Ca_Kabuli_Chr05</i>       | 45429513                       | (A/G)       |
| 9271        | CakSNP9271     | <i>Kabuli</i>    | <i>Ca_Kabuli_Chr05</i>       | 45429518                       | (T/G)       |
| 9272        | CakSNP9272     | <i>Kabuli</i>    | <i>Ca_Kabuli_Chr05</i>       | 45441223                       | (C/T)       |
| 9273        | CakSNP9273     | <i>Kabuli</i>    | <i>Ca_Kabuli_Chr05</i>       | 45444675                       | (G/T)       |
| 9274        | CakSNP9274     | <i>Kabuli</i>    | <i>Ca_Kabuli_Chr05</i>       | 45444924                       | (G/T)       |
| 9275        | CakSNP9275     | <i>Kabuli</i>    | <i>Ca_Kabuli_Chr05</i>       | 45480175                       | (T/G)       |
| 9276        | CakSNP9276     | <i>Kabuli</i>    | <i>Ca_Kabuli_Chr05</i>       | 45501379                       | (C/T)       |
| 9277        | CakSNP9277     | <i>Kabuli</i>    | <i>Ca_Kabuli_Chr05</i>       | 45540473                       | (G/A)       |
| 9278        | CakSNP9278     | <i>Kabuli</i>    | <i>Ca_Kabuli_Chr05</i>       | 45559874                       | (C/A)       |
| 9279        | CakSNP9279     | <i>Kabuli</i>    | <i>Ca_Kabuli_Chr05</i>       | 45601196                       | (A/G)       |
| 9280        | CakSNP9280     | <i>Kabuli</i>    | <i>Ca_Kabuli_Chr05</i>       | 45601313                       | (G/A)       |

| <b>S.N.</b> | <b>SNP IDs</b> | <b>Cultivars</b> | <b>Chromosomes/scaffolds</b> | <b>Physical positions (bp)</b> | <b>SNPs</b> |
|-------------|----------------|------------------|------------------------------|--------------------------------|-------------|
| 9281        | CakSNP9281     | <i>Kabuli</i>    | <i>Ca_Kabuli_Chr05</i>       | 45642344                       | (C/A)       |
| 9282        | CakSNP9282     | <i>Kabuli</i>    | <i>Ca_Kabuli_Chr05</i>       | 45646235                       | (A/G)       |
| 9283        | CakSNP9283     | <i>Kabuli</i>    | <i>Ca_Kabuli_Chr05</i>       | 45649180                       | (G/A)       |
| 9284        | CakSNP9284     | <i>Kabuli</i>    | <i>Ca_Kabuli_Chr05</i>       | 45649189                       | (G/A)       |
| 9285        | CakSNP9285     | <i>Kabuli</i>    | <i>Ca_Kabuli_Chr05</i>       | 45661109                       | (T/C)       |
| 9286        | CakSNP9286     | <i>Kabuli</i>    | <i>Ca_Kabuli_Chr05</i>       | 45694453                       | (T/G)       |
| 9287        | CakSNP9287     | <i>Kabuli</i>    | <i>Ca_Kabuli_Chr05</i>       | 45710509                       | (G/A)       |
| 9288        | CakSNP9288     | <i>Kabuli</i>    | <i>Ca_Kabuli_Chr05</i>       | 45710476                       | (A/G)       |
| 9289        | CakSNP9289     | <i>Kabuli</i>    | <i>Ca_Kabuli_Chr05</i>       | 45726539                       | (T/A)       |
| 9290        | CakSNP9290     | <i>Kabuli</i>    | <i>Ca_Kabuli_Chr05</i>       | 45726995                       | (C/T)       |
| 9291        | CakSNP9291     | <i>Kabuli</i>    | <i>Ca_Kabuli_Chr05</i>       | 45727022                       | (T/C)       |
| 9292        | CakSNP9292     | <i>Kabuli</i>    | <i>Ca_Kabuli_Chr05</i>       | 45750121                       | (A/T)       |
| 9293        | CakSNP9293     | <i>Kabuli</i>    | <i>Ca_Kabuli_Chr05</i>       | 45798850                       | (C/A)       |
| 9294        | CakSNP9294     | <i>Kabuli</i>    | <i>Ca_Kabuli_Chr05</i>       | 45798966                       | (T/G)       |
| 9295        | CakSNP9295     | <i>Kabuli</i>    | <i>Ca_Kabuli_Chr05</i>       | 45798950                       | (C/T)       |
| 9296        | CakSNP9296     | <i>Kabuli</i>    | <i>Ca_Kabuli_Chr05</i>       | 45798919                       | (C/A)       |
| 9297        | CakSNP9297     | <i>Kabuli</i>    | <i>Ca_Kabuli_Chr05</i>       | 45808905                       | (G/A)       |
| 9298        | CakSNP9298     | <i>Kabuli</i>    | <i>Ca_Kabuli_Chr05</i>       | 45832009                       | (T/G)       |
| 9299        | CakSNP9299     | <i>Kabuli</i>    | <i>Ca_Kabuli_Chr05</i>       | 45832048                       | (C/G)       |
| 9300        | CakSNP9300     | <i>Kabuli</i>    | <i>Ca_Kabuli_Chr05</i>       | 45832070                       | (A/T)       |
| 9301        | CakSNP9301     | <i>Kabuli</i>    | <i>Ca_Kabuli_Chr05</i>       | 45842438                       | (A/C)       |
| 9302        | CakSNP9302     | <i>Kabuli</i>    | <i>Ca_Kabuli_Chr05</i>       | 45845081                       | (A/C)       |
| 9303        | CakSNP9303     | <i>Kabuli</i>    | <i>Ca_Kabuli_Chr05</i>       | 45848030                       | (A/G)       |
| 9304        | CakSNP9304     | <i>Kabuli</i>    | <i>Ca_Kabuli_Chr05</i>       | 45848087                       | (T/G)       |
| 9305        | CakSNP9305     | <i>Kabuli</i>    | <i>Ca_Kabuli_Chr05</i>       | 45952107                       | (A/G)       |
| 9306        | CakSNP9306     | <i>Kabuli</i>    | <i>Ca_Kabuli_Chr05</i>       | 45952842                       | (A/C)       |
| 9307        | CakSNP9307     | <i>Kabuli</i>    | <i>Ca_Kabuli_Chr05</i>       | 45971560                       | (G/A)       |
| 9308        | CakSNP9308     | <i>Kabuli</i>    | <i>Ca_Kabuli_Chr05</i>       | 45978758                       | (A/G)       |
| 9309        | CakSNP9309     | <i>Kabuli</i>    | <i>Ca_Kabuli_Chr05</i>       | 46002514                       | (C/T)       |
| 9310        | CakSNP9310     | <i>Kabuli</i>    | <i>Ca_Kabuli_Chr05</i>       | 46002497                       | (G/A)       |
| 9311        | CakSNP9311     | <i>Kabuli</i>    | <i>Ca_Kabuli_Chr05</i>       | 46018939                       | (C/T)       |
| 9312        | CakSNP9312     | <i>Kabuli</i>    | <i>Ca_Kabuli_Chr05</i>       | 46019052                       | (T/A)       |
| 9313        | CakSNP9313     | <i>Kabuli</i>    | <i>Ca_Kabuli_Chr05</i>       | 46022566                       | (C/T)       |
| 9314        | CakSNP9314     | <i>Kabuli</i>    | <i>Ca_Kabuli_Chr05</i>       | 46022598                       | (T/C)       |
| 9315        | CakSNP9315     | <i>Kabuli</i>    | <i>Ca_Kabuli_Chr05</i>       | 46022551                       | (G/A)       |
| 9316        | CakSNP9316     | <i>Kabuli</i>    | <i>Ca_Kabuli_Chr05</i>       | 46022549                       | (G/A)       |
| 9317        | CakSNP9317     | <i>Kabuli</i>    | <i>Ca_Kabuli_Chr05</i>       | 46022547                       | (G/A)       |
| 9318        | CakSNP9318     | <i>Kabuli</i>    | <i>Ca_Kabuli_Chr05</i>       | 46022544                       | (A/G)       |
| 9319        | CakSNP9319     | <i>Kabuli</i>    | <i>Ca_Kabuli_Chr05</i>       | 46022531                       | (T/A)       |



| <b>S.N.</b> | <b>SNP IDs</b> | <b>Cultivars</b> | <b>Chromosomes/scaffolds</b> | <b>Physical positions (bp)</b> | <b>SNPs</b> |
|-------------|----------------|------------------|------------------------------|--------------------------------|-------------|
| 9320        | CakSNP9320     | <i>Kabuli</i>    | <i>Ca_Kabuli_Chr05</i>       | 46049587                       | (A/G)       |
| 9321        | CakSNP9321     | <i>Kabuli</i>    | <i>Ca_Kabuli_Chr05</i>       | 46050168                       | (A/T)       |
| 9322        | CakSNP9322     | <i>Kabuli</i>    | <i>Ca_Kabuli_Chr05</i>       | 46077190                       | (T/C)       |
| 9323        | CakSNP9323     | <i>Kabuli</i>    | <i>Ca_Kabuli_Chr05</i>       | 46077302                       | (G/A)       |
| 9324        | CakSNP9324     | <i>Kabuli</i>    | <i>Ca_Kabuli_Chr05</i>       | 46083283                       | (G/A)       |
| 9325        | CakSNP9325     | <i>Kabuli</i>    | <i>Ca_Kabuli_Chr05</i>       | 46083343                       | (T/G)       |
| 9326        | CakSNP9326     | <i>Kabuli</i>    | <i>Ca_Kabuli_Chr05</i>       | 46083414                       | (T/G)       |
| 9327        | CakSNP9327     | <i>Kabuli</i>    | <i>Ca_Kabuli_Chr05</i>       | 46119122                       | (G/A)       |
| 9328        | CakSNP9328     | <i>Kabuli</i>    | <i>Ca_Kabuli_Chr05</i>       | 46119182                       | (A/G)       |
| 9329        | CakSNP9329     | <i>Kabuli</i>    | <i>Ca_Kabuli_Chr05</i>       | 46130289                       | (A/C)       |
| 9330        | CakSNP9330     | <i>Kabuli</i>    | <i>Ca_Kabuli_Chr05</i>       | 46155262                       | (C/T)       |
| 9331        | CakSNP9331     | <i>Kabuli</i>    | <i>Ca_Kabuli_Chr05</i>       | 46176366                       | (T/C)       |
| 9332        | CakSNP9332     | <i>Kabuli</i>    | <i>Ca_Kabuli_Chr05</i>       | 46176443                       | (G/A)       |
| 9333        | CakSNP9333     | <i>Kabuli</i>    | <i>Ca_Kabuli_Chr05</i>       | 46214229                       | (G/T)       |
| 9334        | CakSNP9334     | <i>Kabuli</i>    | <i>Ca_Kabuli_Chr05</i>       | 46214233                       | (C/T)       |
| 9335        | CakSNP9335     | <i>Kabuli</i>    | <i>Ca_Kabuli_Chr05</i>       | 46230010                       | (G/C)       |
| 9336        | CakSNP9336     | <i>Kabuli</i>    | <i>Ca_Kabuli_Chr05</i>       | 46230011                       | (G/A)       |
| 9337        | CakSNP9337     | <i>Kabuli</i>    | <i>Ca_Kabuli_Chr05</i>       | 46230109                       | (T/G)       |
| 9338        | CakSNP9338     | <i>Kabuli</i>    | <i>Ca_Kabuli_Chr05</i>       | 46246419                       | (G/C)       |
| 9339        | CakSNP9339     | <i>Kabuli</i>    | <i>Ca_Kabuli_Chr05</i>       | 46252617                       | (C/T)       |
| 9340        | CakSNP9340     | <i>Kabuli</i>    | <i>Ca_Kabuli_Chr05</i>       | 46252643                       | (T/A)       |
| 9341        | CakSNP9341     | <i>Kabuli</i>    | <i>Ca_Kabuli_Chr05</i>       | 46252605                       | (C/A)       |
| 9342        | CakSNP9342     | <i>Kabuli</i>    | <i>Ca_Kabuli_Chr05</i>       | 46260822                       | (C/T)       |
| 9343        | CakSNP9343     | <i>Kabuli</i>    | <i>Ca_Kabuli_Chr05</i>       | 46294000                       | (G/A)       |
| 9344        | CakSNP9344     | <i>Kabuli</i>    | <i>Ca_Kabuli_Chr05</i>       | 46300789                       | (G/A)       |
| 9345        | CakSNP9345     | <i>Kabuli</i>    | <i>Ca_Kabuli_Chr05</i>       | 46301639                       | (A/G)       |
| 9346        | CakSNP9346     | <i>Kabuli</i>    | <i>Ca_Kabuli_Chr05</i>       | 46321992                       | (C/T)       |
| 9347        | CakSNP9347     | <i>Kabuli</i>    | <i>Ca_Kabuli_Chr05</i>       | 46328589                       | (C/A)       |
| 9348        | CakSNP9348     | <i>Kabuli</i>    | <i>Ca_Kabuli_Chr05</i>       | 46328627                       | (A/G)       |
| 9349        | CakSNP9349     | <i>Kabuli</i>    | <i>Ca_Kabuli_Chr05</i>       | 46328895                       | (T/C)       |
| 9350        | CakSNP9350     | <i>Kabuli</i>    | <i>Ca_Kabuli_Chr05</i>       | 46328902                       | (C/T)       |
| 9351        | CakSNP9351     | <i>Kabuli</i>    | <i>Ca_Kabuli_Chr05</i>       | 46344109                       | (G/T)       |
| 9352        | CakSNP9352     | <i>Kabuli</i>    | <i>Ca_Kabuli_Chr05</i>       | 46344121                       | (G/A)       |
| 9353        | CakSNP9353     | <i>Kabuli</i>    | <i>Ca_Kabuli_Chr05</i>       | 46356764                       | (G/A)       |
| 9354        | CakSNP9354     | <i>Kabuli</i>    | <i>Ca_Kabuli_Chr05</i>       | 46366598                       | (G/T)       |
| 9355        | CakSNP9355     | <i>Kabuli</i>    | <i>Ca_Kabuli_Chr05</i>       | 46368606                       | (G/T)       |
| 9356        | CakSNP9356     | <i>Kabuli</i>    | <i>Ca_Kabuli_Chr05</i>       | 46376496                       | (G/T)       |
| 9357        | CakSNP9357     | <i>Kabuli</i>    | <i>Ca_Kabuli_Chr05</i>       | 46376532                       | (A/C)       |
| 9358        | CakSNP9358     | <i>Kabuli</i>    | <i>Ca_Kabuli_Chr05</i>       | 46403922                       | (G/T)       |

| <b>S.N.</b> | <b>SNP IDs</b> | <b>Cultivars</b> | <b>Chromosomes/scaffolds</b> | <b>Physical positions (bp)</b> | <b>SNPs</b> |
|-------------|----------------|------------------|------------------------------|--------------------------------|-------------|
| 9359        | CakSNP9359     | <i>Kabuli</i>    | <i>Ca_Kabuli_Chr05</i>       | 46422788                       | (C/G)       |
| 9360        | CakSNP9360     | <i>Kabuli</i>    | <i>Ca_Kabuli_Chr05</i>       | 46422869                       | (A/T)       |
| 9361        | CakSNP9361     | <i>Kabuli</i>    | <i>Ca_Kabuli_Chr05</i>       | 46445611                       | (A/T)       |
| 9362        | CakSNP9362     | <i>Kabuli</i>    | <i>Ca_Kabuli_Chr05</i>       | 46445651                       | (G/T)       |
| 9363        | CakSNP9363     | <i>Kabuli</i>    | <i>Ca_Kabuli_Chr05</i>       | 46491761                       | (C/G)       |
| 9364        | CakSNP9364     | <i>Kabuli</i>    | <i>Ca_Kabuli_Chr05</i>       | 46526963                       | (A/C)       |
| 9365        | CakSNP9365     | <i>Kabuli</i>    | <i>Ca_Kabuli_Chr05</i>       | 46621351                       | (G/A)       |
| 9366        | CakSNP9366     | <i>Kabuli</i>    | <i>Ca_Kabuli_Chr05</i>       | 46621455                       | (C/T)       |
| 9367        | CakSNP9367     | <i>Kabuli</i>    | <i>Ca_Kabuli_Chr05</i>       | 46668462                       | (T/C)       |
| 9368        | CakSNP9368     | <i>Kabuli</i>    | <i>Ca_Kabuli_Chr05</i>       | 46792131                       | (C/T)       |
| 9369        | CakSNP9369     | <i>Kabuli</i>    | <i>Ca_Kabuli_Chr05</i>       | 46945916                       | (G/A)       |
| 9370        | CakSNP9370     | <i>Kabuli</i>    | <i>Ca_Kabuli_Chr05</i>       | 46956474                       | (T/C)       |
| 9371        | CakSNP9371     | <i>Kabuli</i>    | <i>Ca_Kabuli_Chr05</i>       | 47061531                       | (C/T)       |
| 9372        | CakSNP9372     | <i>Kabuli</i>    | <i>Ca_Kabuli_Chr05</i>       | 47073011                       | (A/T)       |
| 9373        | CakSNP9373     | <i>Kabuli</i>    | <i>Ca_Kabuli_Chr05</i>       | 47073016                       | (G/C)       |
| 9374        | CakSNP9374     | <i>Kabuli</i>    | <i>Ca_Kabuli_Chr05</i>       | 47091499                       | (C/T)       |
| 9375        | CakSNP9375     | <i>Kabuli</i>    | <i>Ca_Kabuli_Chr05</i>       | 47151660                       | (C/G)       |
| 9376        | CakSNP9376     | <i>Kabuli</i>    | <i>Ca_Kabuli_Chr05</i>       | 47151840                       | (T/G)       |
| 9377        | CakSNP9377     | <i>Kabuli</i>    | <i>Ca_Kabuli_Chr05</i>       | 47165299                       | (A/C)       |
| 9378        | CakSNP9378     | <i>Kabuli</i>    | <i>Ca_Kabuli_Chr05</i>       | 47256002                       | (G/T)       |
| 9379        | CakSNP9379     | <i>Kabuli</i>    | <i>Ca_Kabuli_Chr05</i>       | 47256038                       | (A/T)       |
| 9380        | CakSNP9380     | <i>Kabuli</i>    | <i>Ca_Kabuli_Chr05</i>       | 47289004                       | (A/C)       |
| 9381        | CakSNP9381     | <i>Kabuli</i>    | <i>Ca_Kabuli_Chr05</i>       | 47298345                       | (A/G)       |
| 9382        | CakSNP9382     | <i>Kabuli</i>    | <i>Ca_Kabuli_Chr05</i>       | 47329979                       | (T/G)       |
| 9383        | CakSNP9383     | <i>Kabuli</i>    | <i>Ca_Kabuli_Chr05</i>       | 47362666                       | (T/G)       |
| 9384        | CakSNP9384     | <i>Kabuli</i>    | <i>Ca_Kabuli_Chr05</i>       | 47362814                       | (C/T)       |
| 9385        | CakSNP9385     | <i>Kabuli</i>    | <i>Ca_Kabuli_Chr05</i>       | 47375789                       | (C/T)       |
| 9386        | CakSNP9386     | <i>Kabuli</i>    | <i>Ca_Kabuli_Chr05</i>       | 47422536                       | (G/A)       |
| 9387        | CakSNP9387     | <i>Kabuli</i>    | <i>Ca_Kabuli_Chr05</i>       | 47518533                       | (G/A)       |
| 9388        | CakSNP9388     | <i>Kabuli</i>    | <i>Ca_Kabuli_Chr05</i>       | 47539345                       | (T/C)       |
| 9389        | CakSNP9389     | <i>Kabuli</i>    | <i>Ca_Kabuli_Chr05</i>       | 47539505                       | (G/T)       |
| 9390        | CakSNP9390     | <i>Kabuli</i>    | <i>Ca_Kabuli_Chr05</i>       | 47570939                       | (T/C)       |
| 9391        | CakSNP9391     | <i>Kabuli</i>    | <i>Ca_Kabuli_Chr05</i>       | 47591327                       | (G/T)       |
| 9392        | CakSNP9392     | <i>Kabuli</i>    | <i>Ca_Kabuli_Chr05</i>       | 47594471                       | (T/C)       |
| 9393        | CakSNP9393     | <i>Kabuli</i>    | <i>Ca_Kabuli_Chr05</i>       | 47641224                       | (A/C)       |
| 9394        | CakSNP9394     | <i>Kabuli</i>    | <i>Ca_Kabuli_Chr05</i>       | 47641472                       | (T/C)       |
| 9395        | CakSNP9395     | <i>Kabuli</i>    | <i>Ca_Kabuli_Chr05</i>       | 47641628                       | (T/C)       |
| 9396        | CakSNP9396     | <i>Kabuli</i>    | <i>Ca_Kabuli_Chr05</i>       | 47641567                       | (A/G)       |
| 9397        | CakSNP9397     | <i>Kabuli</i>    | <i>Ca_Kabuli_Chr05</i>       | 47643992                       | (G/T)       |

| <b>S.N.</b> | <b>SNP IDs</b> | <b>Cultivars</b> | <b>Chromosomes/scaffolds</b> | <b>Physical positions (bp)</b> | <b>SNPs</b> |
|-------------|----------------|------------------|------------------------------|--------------------------------|-------------|
| 9398        | CakSNP9398     | <i>Kabuli</i>    | <i>Ca_Kabuli_Chr05</i>       | 47669124                       | (A/G)       |
| 9399        | CakSNP9399     | <i>Kabuli</i>    | <i>Ca_Kabuli_Chr05</i>       | 47670649                       | (G/A)       |
| 9400        | CakSNP9400     | <i>Kabuli</i>    | <i>Ca_Kabuli_Chr05</i>       | 47706780                       | (G/A)       |
| 9401        | CakSNP9401     | <i>Kabuli</i>    | <i>Ca_Kabuli_Chr05</i>       | 47718830                       | (A/G)       |
| 9402        | CakSNP9402     | <i>Kabuli</i>    | <i>Ca_Kabuli_Chr05</i>       | 47718839                       | (A/G)       |
| 9403        | CakSNP9403     | <i>Kabuli</i>    | <i>Ca_Kabuli_Chr05</i>       | 47733645                       | (A/G)       |
| 9404        | CakSNP9404     | <i>Kabuli</i>    | <i>Ca_Kabuli_Chr05</i>       | 47759169                       | (T/G)       |
| 9405        | CakSNP9405     | <i>Kabuli</i>    | <i>Ca_Kabuli_Chr05</i>       | 47759745                       | (G/A)       |
| 9406        | CakSNP9406     | <i>Kabuli</i>    | <i>Ca_Kabuli_Chr05</i>       | 47761348                       | (A/G)       |
| 9407        | CakSNP9407     | <i>Kabuli</i>    | <i>Ca_Kabuli_Chr05</i>       | 47761322                       | (C/A)       |
| 9408        | CakSNP9408     | <i>Kabuli</i>    | <i>Ca_Kabuli_Chr05</i>       | 47770909                       | (T/G)       |
| 9409        | CakSNP9409     | <i>Kabuli</i>    | <i>Ca_Kabuli_Chr05</i>       | 47774516                       | (A/G)       |
| 9410        | CakSNP9410     | <i>Kabuli</i>    | <i>Ca_Kabuli_Chr05</i>       | 47774559                       | (C/T)       |
| 9411        | CakSNP9411     | <i>Kabuli</i>    | <i>Ca_Kabuli_Chr05</i>       | 47774718                       | (C/G)       |
| 9412        | CakSNP9412     | <i>Kabuli</i>    | <i>Ca_Kabuli_Chr05</i>       | 47775175                       | (C/T)       |
| 9413        | CakSNP9413     | <i>Kabuli</i>    | <i>Ca_Kabuli_Chr05</i>       | 47782605                       | (G/A)       |
| 9414        | CakSNP9414     | <i>Kabuli</i>    | <i>Ca_Kabuli_Chr05</i>       | 47782606                       | (C/T)       |
| 9415        | CakSNP9415     | <i>Kabuli</i>    | <i>Ca_Kabuli_Chr05</i>       | 47782697                       | (T/C)       |
| 9416        | CakSNP9416     | <i>Kabuli</i>    | <i>Ca_Kabuli_Chr05</i>       | 47782843                       | (T/C)       |
| 9417        | CakSNP9417     | <i>Kabuli</i>    | <i>Ca_Kabuli_Chr05</i>       | 47803636                       | (C/A)       |
| 9418        | CakSNP9418     | <i>Kabuli</i>    | <i>Ca_Kabuli_Chr05</i>       | 47812041                       | (C/T)       |
| 9419        | CakSNP9419     | <i>Kabuli</i>    | <i>Ca_Kabuli_Chr05</i>       | 47813712                       | (T/C)       |
| 9420        | CakSNP9420     | <i>Kabuli</i>    | <i>Ca_Kabuli_Chr05</i>       | 47813767                       | (A/G)       |
| 9421        | CakSNP9421     | <i>Kabuli</i>    | <i>Ca_Kabuli_Chr05</i>       | 47829261                       | (T/C)       |
| 9422        | CakSNP9422     | <i>Kabuli</i>    | <i>Ca_Kabuli_Chr05</i>       | 47829331                       | (T/A)       |
| 9423        | CakSNP9423     | <i>Kabuli</i>    | <i>Ca_Kabuli_Chr05</i>       | 47871094                       | (C/T)       |
| 9424        | CakSNP9424     | <i>Kabuli</i>    | <i>Ca_Kabuli_Chr05</i>       | 47871137                       | (G/A)       |
| 9425        | CakSNP9425     | <i>Kabuli</i>    | <i>Ca_Kabuli_Chr05</i>       | 47871248                       | (G/T)       |
| 9426        | CakSNP9426     | <i>Kabuli</i>    | <i>Ca_Kabuli_Chr05</i>       | 47871234                       | (A/G)       |
| 9427        | CakSNP9427     | <i>Kabuli</i>    | <i>Ca_Kabuli_Chr05</i>       | 47871194                       | (T/C)       |
| 9428        | CakSNP9428     | <i>Kabuli</i>    | <i>Ca_Kabuli_Chr05</i>       | 47878997                       | (C/T)       |
| 9429        | CakSNP9429     | <i>Kabuli</i>    | <i>Ca_Kabuli_Chr05</i>       | 47901017                       | (G/T)       |
| 9430        | CakSNP9430     | <i>Kabuli</i>    | <i>Ca_Kabuli_Chr05</i>       | 47931566                       | (T/C)       |
| 9431        | CakSNP9431     | <i>Kabuli</i>    | <i>Ca_Kabuli_Chr05</i>       | 47941783                       | (C/T)       |
| 9432        | CakSNP9432     | <i>Kabuli</i>    | <i>Ca_Kabuli_Chr05</i>       | 47943743                       | (G/A)       |
| 9433        | CakSNP9433     | <i>Kabuli</i>    | <i>Ca_Kabuli_Chr05</i>       | 47965279                       | (G/A)       |
| 9434        | CakSNP9434     | <i>Kabuli</i>    | <i>Ca_Kabuli_Chr05</i>       | 47994780                       | (A/C)       |
| 9435        | CakSNP9435     | <i>Kabuli</i>    | <i>Ca_Kabuli_Chr05</i>       | 47997751                       | (A/T)       |
| 9436        | CakSNP9436     | <i>Kabuli</i>    | <i>Ca_Kabuli_Chr05</i>       | 48005123                       | (A/C)       |

| <b>S.N.</b> | <b>SNP IDs</b> | <b>Cultivars</b> | <b>Chromosomes/scaffolds</b> | <b>Physical positions (bp)</b> | <b>SNPs</b> |
|-------------|----------------|------------------|------------------------------|--------------------------------|-------------|
| 9437        | CakSNP9437     | <i>Kabuli</i>    | <i>Ca_Kabuli_Chr05</i>       | 48005073                       | (G/A)       |
| 9438        | CakSNP9438     | <i>Kabuli</i>    | <i>Ca_Kabuli_Chr05</i>       | 48042132                       | (A/C)       |
| 9439        | CakSNP9439     | <i>Kabuli</i>    | <i>Ca_Kabuli_Chr05</i>       | 48063028                       | (A/T)       |
| 9440        | CakSNP9440     | <i>Kabuli</i>    | <i>Ca_Kabuli_Chr05</i>       | 48069744                       | (G/A)       |
| 9441        | CakSNP9441     | <i>Kabuli</i>    | <i>Ca_Kabuli_Chr05</i>       | 48069811                       | (G/C)       |
| 9442        | CakSNP9442     | <i>Kabuli</i>    | <i>Ca_Kabuli_Chr05</i>       | 48069859                       | (A/T)       |
| 9443        | CakSNP9443     | <i>Kabuli</i>    | <i>Ca_Kabuli_Chr05</i>       | 48069844                       | (T/C)       |
| 9444        | CakSNP9444     | <i>Kabuli</i>    | <i>Ca_Kabuli_Chr05</i>       | 48069833                       | (G/A)       |
| 9445        | CakSNP9445     | <i>Kabuli</i>    | <i>Ca_Kabuli_Chr06</i>       | 1916                           | (T/C)       |
| 9446        | CakSNP9446     | <i>Kabuli</i>    | <i>Ca_Kabuli_Chr06</i>       | 1847                           | (G/T)       |
| 9447        | CakSNP9447     | <i>Kabuli</i>    | <i>Ca_Kabuli_Chr06</i>       | 140189                         | (A/G)       |
| 9448        | CakSNP9448     | <i>Kabuli</i>    | <i>Ca_Kabuli_Chr06</i>       | 140279                         | (T/C)       |
| 9449        | CakSNP9449     | <i>Kabuli</i>    | <i>Ca_Kabuli_Chr06</i>       | 140320                         | (G/A)       |
| 9450        | CakSNP9450     | <i>Kabuli</i>    | <i>Ca_Kabuli_Chr06</i>       | 152513                         | (C/T)       |
| 9451        | CakSNP9451     | <i>Kabuli</i>    | <i>Ca_Kabuli_Chr06</i>       | 152556                         | (T/C)       |
| 9452        | CakSNP9452     | <i>Kabuli</i>    | <i>Ca_Kabuli_Chr06</i>       | 166823                         | (G/A)       |
| 9453        | CakSNP9453     | <i>Kabuli</i>    | <i>Ca_Kabuli_Chr06</i>       | 166806                         | (C/T)       |
| 9454        | CakSNP9454     | <i>Kabuli</i>    | <i>Ca_Kabuli_Chr06</i>       | 166959                         | (G/A)       |
| 9455        | CakSNP9455     | <i>Kabuli</i>    | <i>Ca_Kabuli_Chr06</i>       | 166943                         | (G/A)       |
| 9456        | CakSNP9456     | <i>Kabuli</i>    | <i>Ca_Kabuli_Chr06</i>       | 166938                         | (G/T)       |
| 9457        | CakSNP9457     | <i>Kabuli</i>    | <i>Ca_Kabuli_Chr06</i>       | 166934                         | (G/A)       |
| 9458        | CakSNP9458     | <i>Kabuli</i>    | <i>Ca_Kabuli_Chr06</i>       | 166932                         | (G/A)       |
| 9459        | CakSNP9459     | <i>Kabuli</i>    | <i>Ca_Kabuli_Chr06</i>       | 166911                         | (A/G)       |
| 9460        | CakSNP9460     | <i>Kabuli</i>    | <i>Ca_Kabuli_Chr06</i>       | 204368                         | (G/A)       |
| 9461        | CakSNP9461     | <i>Kabuli</i>    | <i>Ca_Kabuli_Chr06</i>       | 204412                         | (G/C)       |
| 9462        | CakSNP9462     | <i>Kabuli</i>    | <i>Ca_Kabuli_Chr06</i>       | 204438                         | (T/C)       |
| 9463        | CakSNP9463     | <i>Kabuli</i>    | <i>Ca_Kabuli_Chr06</i>       | 267151                         | (A/G)       |
| 9464        | CakSNP9464     | <i>Kabuli</i>    | <i>Ca_Kabuli_Chr06</i>       | 269269                         | (T/G)       |
| 9465        | CakSNP9465     | <i>Kabuli</i>    | <i>Ca_Kabuli_Chr06</i>       | 324301                         | (C/T)       |
| 9466        | CakSNP9466     | <i>Kabuli</i>    | <i>Ca_Kabuli_Chr06</i>       | 348283                         | (C/T)       |
| 9467        | CakSNP9467     | <i>Kabuli</i>    | <i>Ca_Kabuli_Chr06</i>       | 348295                         | (G/C)       |
| 9468        | CakSNP9468     | <i>Kabuli</i>    | <i>Ca_Kabuli_Chr06</i>       | 375684                         | (T/G)       |
| 9469        | CakSNP9469     | <i>Kabuli</i>    | <i>Ca_Kabuli_Chr06</i>       | 386250                         | (A/G)       |
| 9470        | CakSNP9470     | <i>Kabuli</i>    | <i>Ca_Kabuli_Chr06</i>       | 474489                         | (C/A)       |
| 9471        | CakSNP9471     | <i>Kabuli</i>    | <i>Ca_Kabuli_Chr06</i>       | 505875                         | (T/C)       |
| 9472        | CakSNP9472     | <i>Kabuli</i>    | <i>Ca_Kabuli_Chr06</i>       | 515221                         | (T/G)       |
| 9473        | CakSNP9473     | <i>Kabuli</i>    | <i>Ca_Kabuli_Chr06</i>       | 548416                         | (A/T)       |
| 9474        | CakSNP9474     | <i>Kabuli</i>    | <i>Ca_Kabuli_Chr06</i>       | 551130                         | (T/G)       |
| 9475        | CakSNP9475     | <i>Kabuli</i>    | <i>Ca_Kabuli_Chr06</i>       | 561562                         | (A/G)       |

| <b>S.N.</b> | <b>SNP IDs</b> | <b>Cultivars</b> | <b>Chromosomes/scaffolds</b> | <b>Physical positions (bp)</b> | <b>SNPs</b> |
|-------------|----------------|------------------|------------------------------|--------------------------------|-------------|
| 9476        | CakSNP9476     | <i>Kabuli</i>    | <i>Ca_Kabuli_Chr06</i>       | 580616                         | (G/C)       |
| 9477        | CakSNP9477     | <i>Kabuli</i>    | <i>Ca_Kabuli_Chr06</i>       | 588592                         | (C/A)       |
| 9478        | CakSNP9478     | <i>Kabuli</i>    | <i>Ca_Kabuli_Chr06</i>       | 638983                         | (T/A)       |
| 9479        | CakSNP9479     | <i>Kabuli</i>    | <i>Ca_Kabuli_Chr06</i>       | 645755                         | (G/T)       |
| 9480        | CakSNP9480     | <i>Kabuli</i>    | <i>Ca_Kabuli_Chr06</i>       | 645746                         | (G/T)       |
| 9481        | CakSNP9481     | <i>Kabuli</i>    | <i>Ca_Kabuli_Chr06</i>       | 647322                         | (A/C)       |
| 9482        | CakSNP9482     | <i>Kabuli</i>    | <i>Ca_Kabuli_Chr06</i>       | 697187                         | (A/G)       |
| 9483        | CakSNP9483     | <i>Kabuli</i>    | <i>Ca_Kabuli_Chr06</i>       | 697169                         | (A/G)       |
| 9484        | CakSNP9484     | <i>Kabuli</i>    | <i>Ca_Kabuli_Chr06</i>       | 697168                         | (C/T)       |
| 9485        | CakSNP9485     | <i>Kabuli</i>    | <i>Ca_Kabuli_Chr06</i>       | 697162                         | (A/G)       |
| 9486        | CakSNP9486     | <i>Kabuli</i>    | <i>Ca_Kabuli_Chr06</i>       | 697158                         | (G/A)       |
| 9487        | CakSNP9487     | <i>Kabuli</i>    | <i>Ca_Kabuli_Chr06</i>       | 697148                         | (C/T)       |
| 9488        | CakSNP9488     | <i>Kabuli</i>    | <i>Ca_Kabuli_Chr06</i>       | 697147                         | (A/G)       |
| 9489        | CakSNP9489     | <i>Kabuli</i>    | <i>Ca_Kabuli_Chr06</i>       | 697142                         | (G/C)       |
| 9490        | CakSNP9490     | <i>Kabuli</i>    | <i>Ca_Kabuli_Chr06</i>       | 894921                         | (A/G)       |
| 9491        | CakSNP9491     | <i>Kabuli</i>    | <i>Ca_Kabuli_Chr06</i>       | 902403                         | (G/A)       |
| 9492        | CakSNP9492     | <i>Kabuli</i>    | <i>Ca_Kabuli_Chr06</i>       | 902402                         | (T/C)       |
| 9493        | CakSNP9493     | <i>Kabuli</i>    | <i>Ca_Kabuli_Chr06</i>       | 949263                         | (C/A)       |
| 9494        | CakSNP9494     | <i>Kabuli</i>    | <i>Ca_Kabuli_Chr06</i>       | 961652                         | (C/T)       |
| 9495        | CakSNP9495     | <i>Kabuli</i>    | <i>Ca_Kabuli_Chr06</i>       | 961805                         | (C/T)       |
| 9496        | CakSNP9496     | <i>Kabuli</i>    | <i>Ca_Kabuli_Chr06</i>       | 961733                         | (T/A)       |
| 9497        | CakSNP9497     | <i>Kabuli</i>    | <i>Ca_Kabuli_Chr06</i>       | 997997                         | (T/A)       |
| 9498        | CakSNP9498     | <i>Kabuli</i>    | <i>Ca_Kabuli_Chr06</i>       | 1130293                        | (C/T)       |
| 9499        | CakSNP9499     | <i>Kabuli</i>    | <i>Ca_Kabuli_Chr06</i>       | 1212889                        | (G/A)       |
| 9500        | CakSNP9500     | <i>Kabuli</i>    | <i>Ca_Kabuli_Chr06</i>       | 1220425                        | (C/T)       |
| 9501        | CakSNP9501     | <i>Kabuli</i>    | <i>Ca_Kabuli_Chr06</i>       | 1220460                        | (G/C)       |
| 9502        | CakSNP9502     | <i>Kabuli</i>    | <i>Ca_Kabuli_Chr06</i>       | 1220465                        | (G/A)       |
| 9503        | CakSNP9503     | <i>Kabuli</i>    | <i>Ca_Kabuli_Chr06</i>       | 1220510                        | (A/T)       |
| 9504        | CakSNP9504     | <i>Kabuli</i>    | <i>Ca_Kabuli_Chr06</i>       | 1220499                        | (C/G)       |
| 9505        | CakSNP9505     | <i>Kabuli</i>    | <i>Ca_Kabuli_Chr06</i>       | 1287168                        | (C/T)       |
| 9506        | CakSNP9506     | <i>Kabuli</i>    | <i>Ca_Kabuli_Chr06</i>       | 1290413                        | (C/G)       |
| 9507        | CakSNP9507     | <i>Kabuli</i>    | <i>Ca_Kabuli_Chr06</i>       | 1290538                        | (T/G)       |
| 9508        | CakSNP9508     | <i>Kabuli</i>    | <i>Ca_Kabuli_Chr06</i>       | 1295748                        | (T/C)       |
| 9509        | CakSNP9509     | <i>Kabuli</i>    | <i>Ca_Kabuli_Chr06</i>       | 1312881                        | (T/C)       |
| 9510        | CakSNP9510     | <i>Kabuli</i>    | <i>Ca_Kabuli_Chr06</i>       | 1312932                        | (G/A)       |
| 9511        | CakSNP9511     | <i>Kabuli</i>    | <i>Ca_Kabuli_Chr06</i>       | 1312982                        | (C/A)       |
| 9512        | CakSNP9512     | <i>Kabuli</i>    | <i>Ca_Kabuli_Chr06</i>       | 1315583                        | (G/C)       |
| 9513        | CakSNP9513     | <i>Kabuli</i>    | <i>Ca_Kabuli_Chr06</i>       | 1626723                        | (T/C)       |
| 9514        | CakSNP9514     | <i>Kabuli</i>    | <i>Ca_Kabuli_Chr06</i>       | 1626712                        | (C/T)       |

| <b>S.N.</b> | <b>SNP IDs</b> | <b>Cultivars</b> | <b>Chromosomes/scaffolds</b> | <b>Physical positions (bp)</b> | <b>SNPs</b> |
|-------------|----------------|------------------|------------------------------|--------------------------------|-------------|
| 9515        | CakSNP9515     | <i>Kabuli</i>    | <i>Ca_Kabuli_Chr06</i>       | 1817599                        | (C/T)       |
| 9516        | CakSNP9516     | <i>Kabuli</i>    | <i>Ca_Kabuli_Chr06</i>       | 1817602                        | (A/T)       |
| 9517        | CakSNP9517     | <i>Kabuli</i>    | <i>Ca_Kabuli_Chr06</i>       | 1817607                        | (T/C)       |
| 9518        | CakSNP9518     | <i>Kabuli</i>    | <i>Ca_Kabuli_Chr06</i>       | 1817628                        | (A/T)       |
| 9519        | CakSNP9519     | <i>Kabuli</i>    | <i>Ca_Kabuli_Chr06</i>       | 1932114                        | (C/G)       |
| 9520        | CakSNP9520     | <i>Kabuli</i>    | <i>Ca_Kabuli_Chr06</i>       | 1932175                        | (G/A)       |
| 9521        | CakSNP9521     | <i>Kabuli</i>    | <i>Ca_Kabuli_Chr06</i>       | 1966137                        | (T/C)       |
| 9522        | CakSNP9522     | <i>Kabuli</i>    | <i>Ca_Kabuli_Chr06</i>       | 1978781                        | (C/A)       |
| 9523        | CakSNP9523     | <i>Kabuli</i>    | <i>Ca_Kabuli_Chr06</i>       | 1978864                        | (A/C)       |
| 9524        | CakSNP9524     | <i>Kabuli</i>    | <i>Ca_Kabuli_Chr06</i>       | 1978867                        | (T/A)       |
| 9525        | CakSNP9525     | <i>Kabuli</i>    | <i>Ca_Kabuli_Chr06</i>       | 2037575                        | (G/T)       |
| 9526        | CakSNP9526     | <i>Kabuli</i>    | <i>Ca_Kabuli_Chr06</i>       | 2037599                        | (A/G)       |
| 9527        | CakSNP9527     | <i>Kabuli</i>    | <i>Ca_Kabuli_Chr06</i>       | 2037620                        | (T/G)       |
| 9528        | CakSNP9528     | <i>Kabuli</i>    | <i>Ca_Kabuli_Chr06</i>       | 2037623                        | (T/G)       |
| 9529        | CakSNP9529     | <i>Kabuli</i>    | <i>Ca_Kabuli_Chr06</i>       | 2037626                        | (C/T)       |
| 9530        | CakSNP9530     | <i>Kabuli</i>    | <i>Ca_Kabuli_Chr06</i>       | 2050907                        | (A/G)       |
| 9531        | CakSNP9531     | <i>Kabuli</i>    | <i>Ca_Kabuli_Chr06</i>       | 2061459                        | (A/G)       |
| 9532        | CakSNP9532     | <i>Kabuli</i>    | <i>Ca_Kabuli_Chr06</i>       | 2078416                        | (T/A)       |
| 9533        | CakSNP9533     | <i>Kabuli</i>    | <i>Ca_Kabuli_Chr06</i>       | 2079137                        | (T/G)       |
| 9534        | CakSNP9534     | <i>Kabuli</i>    | <i>Ca_Kabuli_Chr06</i>       | 2079186                        | (G/T)       |
| 9535        | CakSNP9535     | <i>Kabuli</i>    | <i>Ca_Kabuli_Chr06</i>       | 2083784                        | (A/T)       |
| 9536        | CakSNP9536     | <i>Kabuli</i>    | <i>Ca_Kabuli_Chr06</i>       | 2083805                        | (G/A)       |
| 9537        | CakSNP9537     | <i>Kabuli</i>    | <i>Ca_Kabuli_Chr06</i>       | 2083813                        | (T/C)       |
| 9538        | CakSNP9538     | <i>Kabuli</i>    | <i>Ca_Kabuli_Chr06</i>       | 2126667                        | (C/T)       |
| 9539        | CakSNP9539     | <i>Kabuli</i>    | <i>Ca_Kabuli_Chr06</i>       | 2126655                        | (G/A)       |
| 9540        | CakSNP9540     | <i>Kabuli</i>    | <i>Ca_Kabuli_Chr06</i>       | 2140189                        | (G/T)       |
| 9541        | CakSNP9541     | <i>Kabuli</i>    | <i>Ca_Kabuli_Chr06</i>       | 2140406                        | (G/A)       |
| 9542        | CakSNP9542     | <i>Kabuli</i>    | <i>Ca_Kabuli_Chr06</i>       | 2193748                        | (T/A)       |
| 9543        | CakSNP9543     | <i>Kabuli</i>    | <i>Ca_Kabuli_Chr06</i>       | 2193763                        | (A/C)       |
| 9544        | CakSNP9544     | <i>Kabuli</i>    | <i>Ca_Kabuli_Chr06</i>       | 2193803                        | (G/A)       |
| 9545        | CakSNP9545     | <i>Kabuli</i>    | <i>Ca_Kabuli_Chr06</i>       | 2214131                        | (T/A)       |
| 9546        | CakSNP9546     | <i>Kabuli</i>    | <i>Ca_Kabuli_Chr06</i>       | 2214178                        | (T/C)       |
| 9547        | CakSNP9547     | <i>Kabuli</i>    | <i>Ca_Kabuli_Chr06</i>       | 2214247                        | (A/G)       |
| 9548        | CakSNP9548     | <i>Kabuli</i>    | <i>Ca_Kabuli_Chr06</i>       | 2223544                        | (A/T)       |
| 9549        | CakSNP9549     | <i>Kabuli</i>    | <i>Ca_Kabuli_Chr06</i>       | 2223578                        | (T/G)       |
| 9550        | CakSNP9550     | <i>Kabuli</i>    | <i>Ca_Kabuli_Chr06</i>       | 2223664                        | (A/C)       |
| 9551        | CakSNP9551     | <i>Kabuli</i>    | <i>Ca_Kabuli_Chr06</i>       | 2244901                        | (A/C)       |
| 9552        | CakSNP9552     | <i>Kabuli</i>    | <i>Ca_Kabuli_Chr06</i>       | 2275505                        | (A/G)       |
| 9553        | CakSNP9553     | <i>Kabuli</i>    | <i>Ca_Kabuli_Chr06</i>       | 2275524                        | (G/A)       |

| <b>S.N.</b> | <b>SNP IDs</b> | <b>Cultivars</b> | <b>Chromosomes/scaffolds</b> | <b>Physical positions (bp)</b> | <b>SNPs</b> |
|-------------|----------------|------------------|------------------------------|--------------------------------|-------------|
| 9554        | CakSNP9554     | <i>Kabuli</i>    | <i>Ca_Kabuli_Chr06</i>       | 2275553                        | (A/G)       |
| 9555        | CakSNP9555     | <i>Kabuli</i>    | <i>Ca_Kabuli_Chr06</i>       | 2280734                        | (T/A)       |
| 9556        | CakSNP9556     | <i>Kabuli</i>    | <i>Ca_Kabuli_Chr06</i>       | 2280752                        | (A/G)       |
| 9557        | CakSNP9557     | <i>Kabuli</i>    | <i>Ca_Kabuli_Chr06</i>       | 2286205                        | (A/G)       |
| 9558        | CakSNP9558     | <i>Kabuli</i>    | <i>Ca_Kabuli_Chr06</i>       | 2286237                        | (C/T)       |
| 9559        | CakSNP9559     | <i>Kabuli</i>    | <i>Ca_Kabuli_Chr06</i>       | 2294911                        | (T/G)       |
| 9560        | CakSNP9560     | <i>Kabuli</i>    | <i>Ca_Kabuli_Chr06</i>       | 2303123                        | (T/G)       |
| 9561        | CakSNP9561     | <i>Kabuli</i>    | <i>Ca_Kabuli_Chr06</i>       | 2313683                        | (A/C)       |
| 9562        | CakSNP9562     | <i>Kabuli</i>    | <i>Ca_Kabuli_Chr06</i>       | 2313828                        | (G/A)       |
| 9563        | CakSNP9563     | <i>Kabuli</i>    | <i>Ca_Kabuli_Chr06</i>       | 2314029                        | (T/C)       |
| 9564        | CakSNP9564     | <i>Kabuli</i>    | <i>Ca_Kabuli_Chr06</i>       | 2327842                        | (A/G)       |
| 9565        | CakSNP9565     | <i>Kabuli</i>    | <i>Ca_Kabuli_Chr06</i>       | 2462481                        | (C/T)       |
| 9566        | CakSNP9566     | <i>Kabuli</i>    | <i>Ca_Kabuli_Chr06</i>       | 2502485                        | (A/G)       |
| 9567        | CakSNP9567     | <i>Kabuli</i>    | <i>Ca_Kabuli_Chr06</i>       | 2527768                        | (A/G)       |
| 9568        | CakSNP9568     | <i>Kabuli</i>    | <i>Ca_Kabuli_Chr06</i>       | 2542942                        | (A/T)       |
| 9569        | CakSNP9569     | <i>Kabuli</i>    | <i>Ca_Kabuli_Chr06</i>       | 2542981                        | (T/C)       |
| 9570        | CakSNP9570     | <i>Kabuli</i>    | <i>Ca_Kabuli_Chr06</i>       | 2543096                        | (C/T)       |
| 9571        | CakSNP9571     | <i>Kabuli</i>    | <i>Ca_Kabuli_Chr06</i>       | 2543062                        | (A/G)       |
| 9572        | CakSNP9572     | <i>Kabuli</i>    | <i>Ca_Kabuli_Chr06</i>       | 2548412                        | (A/G)       |
| 9573        | CakSNP9573     | <i>Kabuli</i>    | <i>Ca_Kabuli_Chr06</i>       | 2549997                        | (C/T)       |
| 9574        | CakSNP9574     | <i>Kabuli</i>    | <i>Ca_Kabuli_Chr06</i>       | 2549991                        | (T/C)       |
| 9575        | CakSNP9575     | <i>Kabuli</i>    | <i>Ca_Kabuli_Chr06</i>       | 2550154                        | (A/C)       |
| 9576        | CakSNP9576     | <i>Kabuli</i>    | <i>Ca_Kabuli_Chr06</i>       | 2623370                        | (T/C)       |
| 9577        | CakSNP9577     | <i>Kabuli</i>    | <i>Ca_Kabuli_Chr06</i>       | 2625793                        | (C/G)       |
| 9578        | CakSNP9578     | <i>Kabuli</i>    | <i>Ca_Kabuli_Chr06</i>       | 2633941                        | (A/T)       |
| 9579        | CakSNP9579     | <i>Kabuli</i>    | <i>Ca_Kabuli_Chr06</i>       | 2639558                        | (T/A)       |
| 9580        | CakSNP9580     | <i>Kabuli</i>    | <i>Ca_Kabuli_Chr06</i>       | 2639606                        | (A/G)       |
| 9581        | CakSNP9581     | <i>Kabuli</i>    | <i>Ca_Kabuli_Chr06</i>       | 2639607                        | (T/C)       |
| 9582        | CakSNP9582     | <i>Kabuli</i>    | <i>Ca_Kabuli_Chr06</i>       | 2676594                        | (C/T)       |
| 9583        | CakSNP9583     | <i>Kabuli</i>    | <i>Ca_Kabuli_Chr06</i>       | 2714894                        | (T/C)       |
| 9584        | CakSNP9584     | <i>Kabuli</i>    | <i>Ca_Kabuli_Chr06</i>       | 2714897                        | (C/A)       |
| 9585        | CakSNP9585     | <i>Kabuli</i>    | <i>Ca_Kabuli_Chr06</i>       | 2714918                        | (T/G)       |
| 9586        | CakSNP9586     | <i>Kabuli</i>    | <i>Ca_Kabuli_Chr06</i>       | 2717150                        | (G/A)       |
| 9587        | CakSNP9587     | <i>Kabuli</i>    | <i>Ca_Kabuli_Chr06</i>       | 2740630                        | (A/G)       |
| 9588        | CakSNP9588     | <i>Kabuli</i>    | <i>Ca_Kabuli_Chr06</i>       | 2740765                        | (A/G)       |
| 9589        | CakSNP9589     | <i>Kabuli</i>    | <i>Ca_Kabuli_Chr06</i>       | 2740784                        | (T/C)       |
| 9590        | CakSNP9590     | <i>Kabuli</i>    | <i>Ca_Kabuli_Chr06</i>       | 2741185                        | (G/A)       |
| 9591        | CakSNP9591     | <i>Kabuli</i>    | <i>Ca_Kabuli_Chr06</i>       | 2777609                        | (A/G)       |
| 9592        | CakSNP9592     | <i>Kabuli</i>    | <i>Ca_Kabuli_Chr06</i>       | 2802942                        | (C/A)       |

| <b>S.N.</b> | <b>SNP IDs</b> | <b>Cultivars</b> | <b>Chromosomes/scaffolds</b> | <b>Physical positions (bp)</b> | <b>SNPs</b> |
|-------------|----------------|------------------|------------------------------|--------------------------------|-------------|
| 9593        | CakSNP9593     | <i>Kabuli</i>    | <i>Ca_Kabuli_Chr06</i>       | 2811345                        | (A/G)       |
| 9594        | CakSNP9594     | <i>Kabuli</i>    | <i>Ca_Kabuli_Chr06</i>       | 2812794                        | (A/C)       |
| 9595        | CakSNP9595     | <i>Kabuli</i>    | <i>Ca_Kabuli_Chr06</i>       | 2812719                        | (G/A)       |
| 9596        | CakSNP9596     | <i>Kabuli</i>    | <i>Ca_Kabuli_Chr06</i>       | 2813244                        | (G/A)       |
| 9597        | CakSNP9597     | <i>Kabuli</i>    | <i>Ca_Kabuli_Chr06</i>       | 2821836                        | (G/T)       |
| 9598        | CakSNP9598     | <i>Kabuli</i>    | <i>Ca_Kabuli_Chr06</i>       | 2846051                        | (C/T)       |
| 9599        | CakSNP9599     | <i>Kabuli</i>    | <i>Ca_Kabuli_Chr06</i>       | 2846018                        | (T/C)       |
| 9600        | CakSNP9600     | <i>Kabuli</i>    | <i>Ca_Kabuli_Chr06</i>       | 2855691                        | (C/G)       |
| 9601        | CakSNP9601     | <i>Kabuli</i>    | <i>Ca_Kabuli_Chr06</i>       | 2864713                        | (G/A)       |
| 9602        | CakSNP9602     | <i>Kabuli</i>    | <i>Ca_Kabuli_Chr06</i>       | 2919355                        | (A/C)       |
| 9603        | CakSNP9603     | <i>Kabuli</i>    | <i>Ca_Kabuli_Chr06</i>       | 2925908                        | (A/G)       |
| 9604        | CakSNP9604     | <i>Kabuli</i>    | <i>Ca_Kabuli_Chr06</i>       | 2925962                        | (G/C)       |
| 9605        | CakSNP9605     | <i>Kabuli</i>    | <i>Ca_Kabuli_Chr06</i>       | 2926006                        | (T/C)       |
| 9606        | CakSNP9606     | <i>Kabuli</i>    | <i>Ca_Kabuli_Chr06</i>       | 2927224                        | (G/A)       |
| 9607        | CakSNP9607     | <i>Kabuli</i>    | <i>Ca_Kabuli_Chr06</i>       | 2927255                        | (C/A)       |
| 9608        | CakSNP9608     | <i>Kabuli</i>    | <i>Ca_Kabuli_Chr06</i>       | 2927271                        | (G/A)       |
| 9609        | CakSNP9609     | <i>Kabuli</i>    | <i>Ca_Kabuli_Chr06</i>       | 2927386                        | (C/G)       |
| 9610        | CakSNP9610     | <i>Kabuli</i>    | <i>Ca_Kabuli_Chr06</i>       | 2927387                        | (T/C)       |
| 9611        | CakSNP9611     | <i>Kabuli</i>    | <i>Ca_Kabuli_Chr06</i>       | 2929355                        | (C/T)       |
| 9612        | CakSNP9612     | <i>Kabuli</i>    | <i>Ca_Kabuli_Chr06</i>       | 2930453                        | (T/C)       |
| 9613        | CakSNP9613     | <i>Kabuli</i>    | <i>Ca_Kabuli_Chr06</i>       | 2930459                        | (C/T)       |
| 9614        | CakSNP9614     | <i>Kabuli</i>    | <i>Ca_Kabuli_Chr06</i>       | 2930504                        | (T/C)       |
| 9615        | CakSNP9615     | <i>Kabuli</i>    | <i>Ca_Kabuli_Chr06</i>       | 2932029                        | (T/C)       |
| 9616        | CakSNP9616     | <i>Kabuli</i>    | <i>Ca_Kabuli_Chr06</i>       | 2932179                        | (T/G)       |
| 9617        | CakSNP9617     | <i>Kabuli</i>    | <i>Ca_Kabuli_Chr06</i>       | 2932168                        | (A/C)       |
| 9618        | CakSNP9618     | <i>Kabuli</i>    | <i>Ca_Kabuli_Chr06</i>       | 2932143                        | (C/A)       |
| 9619        | CakSNP9619     | <i>Kabuli</i>    | <i>Ca_Kabuli_Chr06</i>       | 2932130                        | (T/G)       |
| 9620        | CakSNP9620     | <i>Kabuli</i>    | <i>Ca_Kabuli_Chr06</i>       | 2932777                        | (A/G)       |
| 9621        | CakSNP9621     | <i>Kabuli</i>    | <i>Ca_Kabuli_Chr06</i>       | 2972319                        | (C/T)       |
| 9622        | CakSNP9622     | <i>Kabuli</i>    | <i>Ca_Kabuli_Chr06</i>       | 2972301                        | (T/C)       |
| 9623        | CakSNP9623     | <i>Kabuli</i>    | <i>Ca_Kabuli_Chr06</i>       | 2973741                        | (A/G)       |
| 9624        | CakSNP9624     | <i>Kabuli</i>    | <i>Ca_Kabuli_Chr06</i>       | 2973756                        | (A/C)       |
| 9625        | CakSNP9625     | <i>Kabuli</i>    | <i>Ca_Kabuli_Chr06</i>       | 3060508                        | (G/A)       |
| 9626        | CakSNP9626     | <i>Kabuli</i>    | <i>Ca_Kabuli_Chr06</i>       | 3060502                        | (G/A)       |
| 9627        | CakSNP9627     | <i>Kabuli</i>    | <i>Ca_Kabuli_Chr06</i>       | 3288481                        | (C/A)       |
| 9628        | CakSNP9628     | <i>Kabuli</i>    | <i>Ca_Kabuli_Chr06</i>       | 3288444                        | (G/A)       |
| 9629        | CakSNP9629     | <i>Kabuli</i>    | <i>Ca_Kabuli_Chr06</i>       | 3288441                        | (A/G)       |
| 9630        | CakSNP9630     | <i>Kabuli</i>    | <i>Ca_Kabuli_Chr06</i>       | 3288505                        | (G/T)       |
| 9631        | CakSNP9631     | <i>Kabuli</i>    | <i>Ca_Kabuli_Chr06</i>       | 3297086                        | (G/A)       |



| <b>S.N.</b> | <b>SNP IDs</b> | <b>Cultivars</b> | <b>Chromosomes/scaffolds</b> | <b>Physical positions (bp)</b> | <b>SNPs</b> |
|-------------|----------------|------------------|------------------------------|--------------------------------|-------------|
| 9632        | CakSNP9632     | <i>Kabuli</i>    | <i>Ca_Kabuli_Chr06</i>       | 3298952                        | (A/T)       |
| 9633        | CakSNP9633     | <i>Kabuli</i>    | <i>Ca_Kabuli_Chr06</i>       | 3395024                        | (A/G)       |
| 9634        | CakSNP9634     | <i>Kabuli</i>    | <i>Ca_Kabuli_Chr06</i>       | 3395253                        | (G/A)       |
| 9635        | CakSNP9635     | <i>Kabuli</i>    | <i>Ca_Kabuli_Chr06</i>       | 3395370                        | (C/T)       |
| 9636        | CakSNP9636     | <i>Kabuli</i>    | <i>Ca_Kabuli_Chr06</i>       | 3397650                        | (A/G)       |
| 9637        | CakSNP9637     | <i>Kabuli</i>    | <i>Ca_Kabuli_Chr06</i>       | 3401260                        | (A/G)       |
| 9638        | CakSNP9638     | <i>Kabuli</i>    | <i>Ca_Kabuli_Chr06</i>       | 3401272                        | (G/A)       |
| 9639        | CakSNP9639     | <i>Kabuli</i>    | <i>Ca_Kabuli_Chr06</i>       | 3401277                        | (C/T)       |
| 9640        | CakSNP9640     | <i>Kabuli</i>    | <i>Ca_Kabuli_Chr06</i>       | 3482411                        | (A/G)       |
| 9641        | CakSNP9641     | <i>Kabuli</i>    | <i>Ca_Kabuli_Chr06</i>       | 3505662                        | (C/A)       |
| 9642        | CakSNP9642     | <i>Kabuli</i>    | <i>Ca_Kabuli_Chr06</i>       | 3530094                        | (T/C)       |
| 9643        | CakSNP9643     | <i>Kabuli</i>    | <i>Ca_Kabuli_Chr06</i>       | 3530137                        | (A/G)       |
| 9644        | CakSNP9644     | <i>Kabuli</i>    | <i>Ca_Kabuli_Chr06</i>       | 3548121                        | (C/A)       |
| 9645        | CakSNP9645     | <i>Kabuli</i>    | <i>Ca_Kabuli_Chr06</i>       | 3548114                        | (A/C)       |
| 9646        | CakSNP9646     | <i>Kabuli</i>    | <i>Ca_Kabuli_Chr06</i>       | 3786843                        | (A/G)       |
| 9647        | CakSNP9647     | <i>Kabuli</i>    | <i>Ca_Kabuli_Chr06</i>       | 3787239                        | (C/A)       |
| 9648        | CakSNP9648     | <i>Kabuli</i>    | <i>Ca_Kabuli_Chr06</i>       | 3829070                        | (C/A)       |
| 9649        | CakSNP9649     | <i>Kabuli</i>    | <i>Ca_Kabuli_Chr06</i>       | 3962516                        | (A/C)       |
| 9650        | CakSNP9650     | <i>Kabuli</i>    | <i>Ca_Kabuli_Chr06</i>       | 3985519                        | (G/A)       |
| 9651        | CakSNP9651     | <i>Kabuli</i>    | <i>Ca_Kabuli_Chr06</i>       | 3992419                        | (C/T)       |
| 9652        | CakSNP9652     | <i>Kabuli</i>    | <i>Ca_Kabuli_Chr06</i>       | 4112085                        | (T/C)       |
| 9653        | CakSNP9653     | <i>Kabuli</i>    | <i>Ca_Kabuli_Chr06</i>       | 4226957                        | (G/A)       |
| 9654        | CakSNP9654     | <i>Kabuli</i>    | <i>Ca_Kabuli_Chr06</i>       | 4226947                        | (A/T)       |
| 9655        | CakSNP9655     | <i>Kabuli</i>    | <i>Ca_Kabuli_Chr06</i>       | 4226924                        | (G/T)       |
| 9656        | CakSNP9656     | <i>Kabuli</i>    | <i>Ca_Kabuli_Chr06</i>       | 4226951                        | (C/A)       |
| 9657        | CakSNP9657     | <i>Kabuli</i>    | <i>Ca_Kabuli_Chr06</i>       | 4228728                        | (T/C)       |
| 9658        | CakSNP9658     | <i>Kabuli</i>    | <i>Ca_Kabuli_Chr06</i>       | 4228759                        | (C/G)       |
| 9659        | CakSNP9659     | <i>Kabuli</i>    | <i>Ca_Kabuli_Chr06</i>       | 4228884                        | (T/C)       |
| 9660        | CakSNP9660     | <i>Kabuli</i>    | <i>Ca_Kabuli_Chr06</i>       | 4344604                        | (T/C)       |
| 9661        | CakSNP9661     | <i>Kabuli</i>    | <i>Ca_Kabuli_Chr06</i>       | 4350822                        | (A/T)       |
| 9662        | CakSNP9662     | <i>Kabuli</i>    | <i>Ca_Kabuli_Chr06</i>       | 4350867                        | (A/C)       |
| 9663        | CakSNP9663     | <i>Kabuli</i>    | <i>Ca_Kabuli_Chr06</i>       | 4350889                        | (A/C)       |
| 9664        | CakSNP9664     | <i>Kabuli</i>    | <i>Ca_Kabuli_Chr06</i>       | 4440034                        | (T/G)       |
| 9665        | CakSNP9665     | <i>Kabuli</i>    | <i>Ca_Kabuli_Chr06</i>       | 4562263                        | (C/A)       |
| 9666        | CakSNP9666     | <i>Kabuli</i>    | <i>Ca_Kabuli_Chr06</i>       | 4562264                        | (C/G)       |
| 9667        | CakSNP9667     | <i>Kabuli</i>    | <i>Ca_Kabuli_Chr06</i>       | 4601303                        | (A/C)       |
| 9668        | CakSNP9668     | <i>Kabuli</i>    | <i>Ca_Kabuli_Chr06</i>       | 4678523                        | (A/C)       |
| 9669        | CakSNP9669     | <i>Kabuli</i>    | <i>Ca_Kabuli_Chr06</i>       | 4681686                        | (C/A)       |
| 9670        | CakSNP9670     | <i>Kabuli</i>    | <i>Ca_Kabuli_Chr06</i>       | 4743563                        | (C/G)       |

| <b>S.N.</b> | <b>SNP IDs</b> | <b>Cultivars</b> | <b>Chromosomes/scaffolds</b> | <b>Physical positions (bp)</b> | <b>SNPs</b> |
|-------------|----------------|------------------|------------------------------|--------------------------------|-------------|
| 9671        | CakSNP9671     | <i>Kabuli</i>    | <i>Ca_Kabuli_Chrom6</i>      | 4743608                        | (C/T)       |
| 9672        | CakSNP9672     | <i>Kabuli</i>    | <i>Ca_Kabuli_Chrom6</i>      | 4807908                        | (G/C)       |
| 9673        | CakSNP9673     | <i>Kabuli</i>    | <i>Ca_Kabuli_Chrom6</i>      | 4858109                        | (T/C)       |
| 9674        | CakSNP9674     | <i>Kabuli</i>    | <i>Ca_Kabuli_Chrom6</i>      | 4861184                        | (T/G)       |
| 9675        | CakSNP9675     | <i>Kabuli</i>    | <i>Ca_Kabuli_Chrom6</i>      | 4981078                        | (G/T)       |
| 9676        | CakSNP9676     | <i>Kabuli</i>    | <i>Ca_Kabuli_Chrom6</i>      | 5185380                        | (A/G)       |
| 9677        | CakSNP9677     | <i>Kabuli</i>    | <i>Ca_Kabuli_Chrom6</i>      | 5309445                        | (G/A)       |
| 9678        | CakSNP9678     | <i>Kabuli</i>    | <i>Ca_Kabuli_Chrom6</i>      | 5338761                        | (T/G)       |
| 9679        | CakSNP9679     | <i>Kabuli</i>    | <i>Ca_Kabuli_Chrom6</i>      | 5341510                        | (C/A)       |
| 9680        | CakSNP9680     | <i>Kabuli</i>    | <i>Ca_Kabuli_Chrom6</i>      | 5366094                        | (A/G)       |
| 9681        | CakSNP9681     | <i>Kabuli</i>    | <i>Ca_Kabuli_Chrom6</i>      | 5368455                        | (T/G)       |
| 9682        | CakSNP9682     | <i>Kabuli</i>    | <i>Ca_Kabuli_Chrom6</i>      | 5392161                        | (G/A)       |
| 9683        | CakSNP9683     | <i>Kabuli</i>    | <i>Ca_Kabuli_Chrom6</i>      | 5392185                        | (T/C)       |
| 9684        | CakSNP9684     | <i>Kabuli</i>    | <i>Ca_Kabuli_Chrom6</i>      | 5396888                        | (T/G)       |
| 9685        | CakSNP9685     | <i>Kabuli</i>    | <i>Ca_Kabuli_Chrom6</i>      | 5396890                        | (T/G)       |
| 9686        | CakSNP9686     | <i>Kabuli</i>    | <i>Ca_Kabuli_Chrom6</i>      | 5396897                        | (T/G)       |
| 9687        | CakSNP9687     | <i>Kabuli</i>    | <i>Ca_Kabuli_Chrom6</i>      | 5396913                        | (C/T)       |
| 9688        | CakSNP9688     | <i>Kabuli</i>    | <i>Ca_Kabuli_Chrom6</i>      | 5396916                        | (C/T)       |
| 9689        | CakSNP9689     | <i>Kabuli</i>    | <i>Ca_Kabuli_Chrom6</i>      | 5401307                        | (T/C)       |
| 9690        | CakSNP9690     | <i>Kabuli</i>    | <i>Ca_Kabuli_Chrom6</i>      | 5453512                        | (A/G)       |
| 9691        | CakSNP9691     | <i>Kabuli</i>    | <i>Ca_Kabuli_Chrom6</i>      | 5498898                        | (C/T)       |
| 9692        | CakSNP9692     | <i>Kabuli</i>    | <i>Ca_Kabuli_Chrom6</i>      | 5500791                        | (C/T)       |
| 9693        | CakSNP9693     | <i>Kabuli</i>    | <i>Ca_Kabuli_Chrom6</i>      | 5501363                        | (T/C)       |
| 9694        | CakSNP9694     | <i>Kabuli</i>    | <i>Ca_Kabuli_Chrom6</i>      | 5541264                        | (A/G)       |
| 9695        | CakSNP9695     | <i>Kabuli</i>    | <i>Ca_Kabuli_Chrom6</i>      | 5567967                        | (T/C)       |
| 9696        | CakSNP9696     | <i>Kabuli</i>    | <i>Ca_Kabuli_Chrom6</i>      | 5589373                        | (T/C)       |
| 9697        | CakSNP9697     | <i>Kabuli</i>    | <i>Ca_Kabuli_Chrom6</i>      | 5616372                        | (C/T)       |
| 9698        | CakSNP9698     | <i>Kabuli</i>    | <i>Ca_Kabuli_Chrom6</i>      | 5616482                        | (A/G)       |
| 9699        | CakSNP9699     | <i>Kabuli</i>    | <i>Ca_Kabuli_Chrom6</i>      | 5616454                        | (T/A)       |
| 9700        | CakSNP9700     | <i>Kabuli</i>    | <i>Ca_Kabuli_Chrom6</i>      | 5628948                        | (C/A)       |
| 9701        | CakSNP9701     | <i>Kabuli</i>    | <i>Ca_Kabuli_Chrom6</i>      | 5628956                        | (T/G)       |
| 9702        | CakSNP9702     | <i>Kabuli</i>    | <i>Ca_Kabuli_Chrom6</i>      | 5692120                        | (C/A)       |
| 9703        | CakSNP9703     | <i>Kabuli</i>    | <i>Ca_Kabuli_Chrom6</i>      | 5694397                        | (G/T)       |
| 9704        | CakSNP9704     | <i>Kabuli</i>    | <i>Ca_Kabuli_Chrom6</i>      | 5701004                        | (A/G)       |
| 9705        | CakSNP9705     | <i>Kabuli</i>    | <i>Ca_Kabuli_Chrom6</i>      | 5704845                        | (T/C)       |
| 9706        | CakSNP9706     | <i>Kabuli</i>    | <i>Ca_Kabuli_Chrom6</i>      | 5704809                        | (T/A)       |
| 9707        | CakSNP9707     | <i>Kabuli</i>    | <i>Ca_Kabuli_Chrom6</i>      | 5706649                        | (C/T)       |
| 9708        | CakSNP9708     | <i>Kabuli</i>    | <i>Ca_Kabuli_Chrom6</i>      | 5841443                        | (G/C)       |
| 9709        | CakSNP9709     | <i>Kabuli</i>    | <i>Ca_Kabuli_Chrom6</i>      | 5871537                        | (G/A)       |

| <b>S.N.</b> | <b>SNP IDs</b> | <b>Cultivars</b> | <b>Chromosomes/scaffolds</b> | <b>Physical positions (bp)</b> | <b>SNPs</b> |
|-------------|----------------|------------------|------------------------------|--------------------------------|-------------|
| 9710        | CakSNP9710     | <i>Kabuli</i>    | <i>Ca_Kabuli_Chr06</i>       | 5886393                        | (A/G)       |
| 9711        | CakSNP9711     | <i>Kabuli</i>    | <i>Ca_Kabuli_Chr06</i>       | 5888423                        | (A/G)       |
| 9712        | CakSNP9712     | <i>Kabuli</i>    | <i>Ca_Kabuli_Chr06</i>       | 5924967                        | (G/T)       |
| 9713        | CakSNP9713     | <i>Kabuli</i>    | <i>Ca_Kabuli_Chr06</i>       | 5925028                        | (G/T)       |
| 9714        | CakSNP9714     | <i>Kabuli</i>    | <i>Ca_Kabuli_Chr06</i>       | 6110805                        | (T/C)       |
| 9715        | CakSNP9715     | <i>Kabuli</i>    | <i>Ca_Kabuli_Chr06</i>       | 6119644                        | (C/A)       |
| 9716        | CakSNP9716     | <i>Kabuli</i>    | <i>Ca_Kabuli_Chr06</i>       | 6131564                        | (G/A)       |
| 9717        | CakSNP9717     | <i>Kabuli</i>    | <i>Ca_Kabuli_Chr06</i>       | 6131518                        | (G/T)       |
| 9718        | CakSNP9718     | <i>Kabuli</i>    | <i>Ca_Kabuli_Chr06</i>       | 6131514                        | (G/T)       |
| 9719        | CakSNP9719     | <i>Kabuli</i>    | <i>Ca_Kabuli_Chr06</i>       | 6169291                        | (A/G)       |
| 9720        | CakSNP9720     | <i>Kabuli</i>    | <i>Ca_Kabuli_Chr06</i>       | 6192895                        | (A/T)       |
| 9721        | CakSNP9721     | <i>Kabuli</i>    | <i>Ca_Kabuli_Chr06</i>       | 6193105                        | (G/C)       |
| 9722        | CakSNP9722     | <i>Kabuli</i>    | <i>Ca_Kabuli_Chr06</i>       | 6216766                        | (T/G)       |
| 9723        | CakSNP9723     | <i>Kabuli</i>    | <i>Ca_Kabuli_Chr06</i>       | 6216746                        | (G/C)       |
| 9724        | CakSNP9724     | <i>Kabuli</i>    | <i>Ca_Kabuli_Chr06</i>       | 6227887                        | (A/G)       |
| 9725        | CakSNP9725     | <i>Kabuli</i>    | <i>Ca_Kabuli_Chr06</i>       | 6248260                        | (T/C)       |
| 9726        | CakSNP9726     | <i>Kabuli</i>    | <i>Ca_Kabuli_Chr06</i>       | 6248203                        | (A/G)       |
| 9727        | CakSNP9727     | <i>Kabuli</i>    | <i>Ca_Kabuli_Chr06</i>       | 6415818                        | (A/G)       |
| 9728        | CakSNP9728     | <i>Kabuli</i>    | <i>Ca_Kabuli_Chr06</i>       | 6443828                        | (C/G)       |
| 9729        | CakSNP9729     | <i>Kabuli</i>    | <i>Ca_Kabuli_Chr06</i>       | 6444169                        | (A/G)       |
| 9730        | CakSNP9730     | <i>Kabuli</i>    | <i>Ca_Kabuli_Chr06</i>       | 6444226                        | (T/G)       |
| 9731        | CakSNP9731     | <i>Kabuli</i>    | <i>Ca_Kabuli_Chr06</i>       | 6444243                        | (G/A)       |
| 9732        | CakSNP9732     | <i>Kabuli</i>    | <i>Ca_Kabuli_Chr06</i>       | 6444220                        | (G/A)       |
| 9733        | CakSNP9733     | <i>Kabuli</i>    | <i>Ca_Kabuli_Chr06</i>       | 6517785                        | (T/C)       |
| 9734        | CakSNP9734     | <i>Kabuli</i>    | <i>Ca_Kabuli_Chr06</i>       | 6517849                        | (C/T)       |
| 9735        | CakSNP9735     | <i>Kabuli</i>    | <i>Ca_Kabuli_Chr06</i>       | 6538236                        | (C/T)       |
| 9736        | CakSNP9736     | <i>Kabuli</i>    | <i>Ca_Kabuli_Chr06</i>       | 6604713                        | (G/A)       |
| 9737        | CakSNP9737     | <i>Kabuli</i>    | <i>Ca_Kabuli_Chr06</i>       | 6604766                        | (C/A)       |
| 9738        | CakSNP9738     | <i>Kabuli</i>    | <i>Ca_Kabuli_Chr06</i>       | 6607773                        | (A/G)       |
| 9739        | CakSNP9739     | <i>Kabuli</i>    | <i>Ca_Kabuli_Chr06</i>       | 6631216                        | (C/T)       |
| 9740        | CakSNP9740     | <i>Kabuli</i>    | <i>Ca_Kabuli_Chr06</i>       | 6654917                        | (T/C)       |
| 9741        | CakSNP9741     | <i>Kabuli</i>    | <i>Ca_Kabuli_Chr06</i>       | 6764292                        | (G/A)       |
| 9742        | CakSNP9742     | <i>Kabuli</i>    | <i>Ca_Kabuli_Chr06</i>       | 6779147                        | (G/C)       |
| 9743        | CakSNP9743     | <i>Kabuli</i>    | <i>Ca_Kabuli_Chr06</i>       | 6779982                        | (C/T)       |
| 9744        | CakSNP9744     | <i>Kabuli</i>    | <i>Ca_Kabuli_Chr06</i>       | 6792012                        | (C/T)       |
| 9745        | CakSNP9745     | <i>Kabuli</i>    | <i>Ca_Kabuli_Chr06</i>       | 6800935                        | (A/T)       |
| 9746        | CakSNP9746     | <i>Kabuli</i>    | <i>Ca_Kabuli_Chr06</i>       | 6800927                        | (G/T)       |
| 9747        | CakSNP9747     | <i>Kabuli</i>    | <i>Ca_Kabuli_Chr06</i>       | 6800877                        | (T/A)       |
| 9748        | CakSNP9748     | <i>Kabuli</i>    | <i>Ca_Kabuli_Chr06</i>       | 6802259                        | (C/T)       |

| <b>S.N.</b> | <b>SNP IDs</b> | <b>Cultivars</b> | <b>Chromosomes/scaffolds</b> | <b>Physical positions (bp)</b> | <b>SNPs</b> |
|-------------|----------------|------------------|------------------------------|--------------------------------|-------------|
| 9749        | CakSNP9749     | <i>Kabuli</i>    | <i>Ca_Kabuli_Chr06</i>       | 6802651                        | (A/G)       |
| 9750        | CakSNP9750     | <i>Kabuli</i>    | <i>Ca_Kabuli_Chr06</i>       | 6803433                        | (A/G)       |
| 9751        | CakSNP9751     | <i>Kabuli</i>    | <i>Ca_Kabuli_Chr06</i>       | 6815594                        | (G/A)       |
| 9752        | CakSNP9752     | <i>Kabuli</i>    | <i>Ca_Kabuli_Chr06</i>       | 6840803                        | (T/C)       |
| 9753        | CakSNP9753     | <i>Kabuli</i>    | <i>Ca_Kabuli_Chr06</i>       | 6853983                        | (G/A)       |
| 9754        | CakSNP9754     | <i>Kabuli</i>    | <i>Ca_Kabuli_Chr06</i>       | 6871801                        | (A/G)       |
| 9755        | CakSNP9755     | <i>Kabuli</i>    | <i>Ca_Kabuli_Chr06</i>       | 6877020                        | (C/G)       |
| 9756        | CakSNP9756     | <i>Kabuli</i>    | <i>Ca_Kabuli_Chr06</i>       | 6877088                        | (C/A)       |
| 9757        | CakSNP9757     | <i>Kabuli</i>    | <i>Ca_Kabuli_Chr06</i>       | 6877163                        | (T/C)       |
| 9758        | CakSNP9758     | <i>Kabuli</i>    | <i>Ca_Kabuli_Chr06</i>       | 6877246                        | (C/A)       |
| 9759        | CakSNP9759     | <i>Kabuli</i>    | <i>Ca_Kabuli_Chr06</i>       | 6877284                        | (C/T)       |
| 9760        | CakSNP9760     | <i>Kabuli</i>    | <i>Ca_Kabuli_Chr06</i>       | 6899977                        | (G/A)       |
| 9761        | CakSNP9761     | <i>Kabuli</i>    | <i>Ca_Kabuli_Chr06</i>       | 6899949                        | (T/G)       |
| 9762        | CakSNP9762     | <i>Kabuli</i>    | <i>Ca_Kabuli_Chr06</i>       | 6913639                        | (T/C)       |
| 9763        | CakSNP9763     | <i>Kabuli</i>    | <i>Ca_Kabuli_Chr06</i>       | 6913622                        | (A/C)       |
| 9764        | CakSNP9764     | <i>Kabuli</i>    | <i>Ca_Kabuli_Chr06</i>       | 6913695                        | (G/A)       |
| 9765        | CakSNP9765     | <i>Kabuli</i>    | <i>Ca_Kabuli_Chr06</i>       | 6913825                        | (G/A)       |
| 9766        | CakSNP9766     | <i>Kabuli</i>    | <i>Ca_Kabuli_Chr06</i>       | 6913821                        | (A/T)       |
| 9767        | CakSNP9767     | <i>Kabuli</i>    | <i>Ca_Kabuli_Chr06</i>       | 6954468                        | (A/G)       |
| 9768        | CakSNP9768     | <i>Kabuli</i>    | <i>Ca_Kabuli_Chr06</i>       | 6954480                        | (A/G)       |
| 9769        | CakSNP9769     | <i>Kabuli</i>    | <i>Ca_Kabuli_Chr06</i>       | 7026495                        | (G/A)       |
| 9770        | CakSNP9770     | <i>Kabuli</i>    | <i>Ca_Kabuli_Chr06</i>       | 7026481                        | (G/C)       |
| 9771        | CakSNP9771     | <i>Kabuli</i>    | <i>Ca_Kabuli_Chr06</i>       | 7039578                        | (C/T)       |
| 9772        | CakSNP9772     | <i>Kabuli</i>    | <i>Ca_Kabuli_Chr06</i>       | 7040231                        | (A/C)       |
| 9773        | CakSNP9773     | <i>Kabuli</i>    | <i>Ca_Kabuli_Chr06</i>       | 7138381                        | (G/A)       |
| 9774        | CakSNP9774     | <i>Kabuli</i>    | <i>Ca_Kabuli_Chr06</i>       | 7259533                        | (T/A)       |
| 9775        | CakSNP9775     | <i>Kabuli</i>    | <i>Ca_Kabuli_Chr06</i>       | 7271634                        | (C/T)       |
| 9776        | CakSNP9776     | <i>Kabuli</i>    | <i>Ca_Kabuli_Chr06</i>       | 7332579                        | (T/C)       |
| 9777        | CakSNP9777     | <i>Kabuli</i>    | <i>Ca_Kabuli_Chr06</i>       | 7332585                        | (T/C)       |
| 9778        | CakSNP9778     | <i>Kabuli</i>    | <i>Ca_Kabuli_Chr06</i>       | 7332762                        | (C/T)       |
| 9779        | CakSNP9779     | <i>Kabuli</i>    | <i>Ca_Kabuli_Chr06</i>       | 7349517                        | (A/C)       |
| 9780        | CakSNP9780     | <i>Kabuli</i>    | <i>Ca_Kabuli_Chr06</i>       | 7377229                        | (G/A)       |
| 9781        | CakSNP9781     | <i>Kabuli</i>    | <i>Ca_Kabuli_Chr06</i>       | 7377276                        | (G/A)       |
| 9782        | CakSNP9782     | <i>Kabuli</i>    | <i>Ca_Kabuli_Chr06</i>       | 7406219                        | (A/G)       |
| 9783        | CakSNP9783     | <i>Kabuli</i>    | <i>Ca_Kabuli_Chr06</i>       | 7406233                        | (G/A)       |
| 9784        | CakSNP9784     | <i>Kabuli</i>    | <i>Ca_Kabuli_Chr06</i>       | 7406301                        | (T/C)       |
| 9785        | CakSNP9785     | <i>Kabuli</i>    | <i>Ca_Kabuli_Chr06</i>       | 7531353                        | (G/A)       |
| 9786        | CakSNP9786     | <i>Kabuli</i>    | <i>Ca_Kabuli_Chr06</i>       | 7531445                        | (G/A)       |
| 9787        | CakSNP9787     | <i>Kabuli</i>    | <i>Ca_Kabuli_Chr06</i>       | 7531456                        | (T/A)       |

| <b>S.N.</b> | <b>SNP IDs</b> | <b>Cultivars</b> | <b>Chromosomes/scaffolds</b> | <b>Physical positions (bp)</b> | <b>SNPs</b> |
|-------------|----------------|------------------|------------------------------|--------------------------------|-------------|
| 9788        | CakSNP9788     | <i>Kabuli</i>    | <i>Ca_Kabuli_Chr06</i>       | 7534360                        | (G/T)       |
| 9789        | CakSNP9789     | <i>Kabuli</i>    | <i>Ca_Kabuli_Chr06</i>       | 7543580                        | (C/T)       |
| 9790        | CakSNP9790     | <i>Kabuli</i>    | <i>Ca_Kabuli_Chr06</i>       | 7554094                        | (T/A)       |
| 9791        | CakSNP9791     | <i>Kabuli</i>    | <i>Ca_Kabuli_Chr06</i>       | 7571950                        | (T/C)       |
| 9792        | CakSNP9792     | <i>Kabuli</i>    | <i>Ca_Kabuli_Chr06</i>       | 7582726                        | (G/T)       |
| 9793        | CakSNP9793     | <i>Kabuli</i>    | <i>Ca_Kabuli_Chr06</i>       | 7600817                        | (G/A)       |
| 9794        | CakSNP9794     | <i>Kabuli</i>    | <i>Ca_Kabuli_Chr06</i>       | 7603195                        | (G/A)       |
| 9795        | CakSNP9795     | <i>Kabuli</i>    | <i>Ca_Kabuli_Chr06</i>       | 7603178                        | (A/C)       |
| 9796        | CakSNP9796     | <i>Kabuli</i>    | <i>Ca_Kabuli_Chr06</i>       | 7609814                        | (C/T)       |
| 9797        | CakSNP9797     | <i>Kabuli</i>    | <i>Ca_Kabuli_Chr06</i>       | 7647907                        | (T/G)       |
| 9798        | CakSNP9798     | <i>Kabuli</i>    | <i>Ca_Kabuli_Chr06</i>       | 7647931                        | (G/A)       |
| 9799        | CakSNP9799     | <i>Kabuli</i>    | <i>Ca_Kabuli_Chr06</i>       | 7661930                        | (T/G)       |
| 9800        | CakSNP9800     | <i>Kabuli</i>    | <i>Ca_Kabuli_Chr06</i>       | 7661924                        | (T/C)       |
| 9801        | CakSNP9801     | <i>Kabuli</i>    | <i>Ca_Kabuli_Chr06</i>       | 7667301                        | (T/C)       |
| 9802        | CakSNP9802     | <i>Kabuli</i>    | <i>Ca_Kabuli_Chr06</i>       | 7667328                        | (A/T)       |
| 9803        | CakSNP9803     | <i>Kabuli</i>    | <i>Ca_Kabuli_Chr06</i>       | 7673403                        | (C/T)       |
| 9804        | CakSNP9804     | <i>Kabuli</i>    | <i>Ca_Kabuli_Chr06</i>       | 7694609                        | (A/T)       |
| 9805        | CakSNP9805     | <i>Kabuli</i>    | <i>Ca_Kabuli_Chr06</i>       | 7694625                        | (G/T)       |
| 9806        | CakSNP9806     | <i>Kabuli</i>    | <i>Ca_Kabuli_Chr06</i>       | 7694696                        | (T/C)       |
| 9807        | CakSNP9807     | <i>Kabuli</i>    | <i>Ca_Kabuli_Chr06</i>       | 7744730                        | (A/G)       |
| 9808        | CakSNP9808     | <i>Kabuli</i>    | <i>Ca_Kabuli_Chr06</i>       | 7744752                        | (T/C)       |
| 9809        | CakSNP9809     | <i>Kabuli</i>    | <i>Ca_Kabuli_Chr06</i>       | 7745641                        | (A/G)       |
| 9810        | CakSNP9810     | <i>Kabuli</i>    | <i>Ca_Kabuli_Chr06</i>       | 7747254                        | (G/A)       |
| 9811        | CakSNP9811     | <i>Kabuli</i>    | <i>Ca_Kabuli_Chr06</i>       | 7764968                        | (A/G)       |
| 9812        | CakSNP9812     | <i>Kabuli</i>    | <i>Ca_Kabuli_Chr06</i>       | 7770357                        | (C/T)       |
| 9813        | CakSNP9813     | <i>Kabuli</i>    | <i>Ca_Kabuli_Chr06</i>       | 7805886                        | (G/T)       |
| 9814        | CakSNP9814     | <i>Kabuli</i>    | <i>Ca_Kabuli_Chr06</i>       | 7821850                        | (A/G)       |
| 9815        | CakSNP9815     | <i>Kabuli</i>    | <i>Ca_Kabuli_Chr06</i>       | 7822666                        | (C/A)       |
| 9816        | CakSNP9816     | <i>Kabuli</i>    | <i>Ca_Kabuli_Chr06</i>       | 7829485                        | (G/A)       |
| 9817        | CakSNP9817     | <i>Kabuli</i>    | <i>Ca_Kabuli_Chr06</i>       | 7829627                        | (T/G)       |
| 9818        | CakSNP9818     | <i>Kabuli</i>    | <i>Ca_Kabuli_Chr06</i>       | 7831214                        | (C/T)       |
| 9819        | CakSNP9819     | <i>Kabuli</i>    | <i>Ca_Kabuli_Chr06</i>       | 7831409                        | (C/T)       |
| 9820        | CakSNP9820     | <i>Kabuli</i>    | <i>Ca_Kabuli_Chr06</i>       | 7831585                        | (G/A)       |
| 9821        | CakSNP9821     | <i>Kabuli</i>    | <i>Ca_Kabuli_Chr06</i>       | 7831874                        | (A/G)       |
| 9822        | CakSNP9822     | <i>Kabuli</i>    | <i>Ca_Kabuli_Chr06</i>       | 7831898                        | (G/A)       |
| 9823        | CakSNP9823     | <i>Kabuli</i>    | <i>Ca_Kabuli_Chr06</i>       | 7831899                        | (G/A)       |
| 9824        | CakSNP9824     | <i>Kabuli</i>    | <i>Ca_Kabuli_Chr06</i>       | 7832029                        | (C/T)       |
| 9825        | CakSNP9825     | <i>Kabuli</i>    | <i>Ca_Kabuli_Chr06</i>       | 7832023                        | (C/T)       |
| 9826        | CakSNP9826     | <i>Kabuli</i>    | <i>Ca_Kabuli_Chr06</i>       | 7834595                        | (C/T)       |

| <b>S.N.</b> | <b>SNP IDs</b> | <b>Cultivars</b> | <b>Chromosomes/scaffolds</b> | <b>Physical positions (bp)</b> | <b>SNPs</b> |
|-------------|----------------|------------------|------------------------------|--------------------------------|-------------|
| 9827        | CakSNP9827     | <i>Kabuli</i>    | <i>Ca_Kabuli_Chr06</i>       | 7834922                        | (G/A)       |
| 9828        | CakSNP9828     | <i>Kabuli</i>    | <i>Ca_Kabuli_Chr06</i>       | 7834895                        | (G/T)       |
| 9829        | CakSNP9829     | <i>Kabuli</i>    | <i>Ca_Kabuli_Chr06</i>       | 7834976                        | (G/A)       |
| 9830        | CakSNP9830     | <i>Kabuli</i>    | <i>Ca_Kabuli_Chr06</i>       | 7835427                        | (G/A)       |
| 9831        | CakSNP9831     | <i>Kabuli</i>    | <i>Ca_Kabuli_Chr06</i>       | 7835738                        | (C/T)       |
| 9832        | CakSNP9832     | <i>Kabuli</i>    | <i>Ca_Kabuli_Chr06</i>       | 7835984                        | (T/A)       |
| 9833        | CakSNP9833     | <i>Kabuli</i>    | <i>Ca_Kabuli_Chr06</i>       | 7851000                        | (G/C)       |
| 9834        | CakSNP9834     | <i>Kabuli</i>    | <i>Ca_Kabuli_Chr06</i>       | 7929263                        | (C/T)       |
| 9835        | CakSNP9835     | <i>Kabuli</i>    | <i>Ca_Kabuli_Chr06</i>       | 7929338                        | (T/C)       |
| 9836        | CakSNP9836     | <i>Kabuli</i>    | <i>Ca_Kabuli_Chr06</i>       | 7929339                        | (G/A)       |
| 9837        | CakSNP9837     | <i>Kabuli</i>    | <i>Ca_Kabuli_Chr06</i>       | 7929348                        | (C/T)       |
| 9838        | CakSNP9838     | <i>Kabuli</i>    | <i>Ca_Kabuli_Chr06</i>       | 7929384                        | (T/C)       |
| 9839        | CakSNP9839     | <i>Kabuli</i>    | <i>Ca_Kabuli_Chr06</i>       | 7929493                        | (A/G)       |
| 9840        | CakSNP9840     | <i>Kabuli</i>    | <i>Ca_Kabuli_Chr06</i>       | 7929629                        | (G/A)       |
| 9841        | CakSNP9841     | <i>Kabuli</i>    | <i>Ca_Kabuli_Chr06</i>       | 7929628                        | (C/T)       |
| 9842        | CakSNP9842     | <i>Kabuli</i>    | <i>Ca_Kabuli_Chr06</i>       | 7929607                        | (A/C)       |
| 9843        | CakSNP9843     | <i>Kabuli</i>    | <i>Ca_Kabuli_Chr06</i>       | 7939277                        | (T/A)       |
| 9844        | CakSNP9844     | <i>Kabuli</i>    | <i>Ca_Kabuli_Chr06</i>       | 7939281                        | (T/G)       |
| 9845        | CakSNP9845     | <i>Kabuli</i>    | <i>Ca_Kabuli_Chr06</i>       | 7939465                        | (A/G)       |
| 9846        | CakSNP9846     | <i>Kabuli</i>    | <i>Ca_Kabuli_Chr06</i>       | 7943546                        | (C/G)       |
| 9847        | CakSNP9847     | <i>Kabuli</i>    | <i>Ca_Kabuli_Chr06</i>       | 7994732                        | (G/T)       |
| 9848        | CakSNP9848     | <i>Kabuli</i>    | <i>Ca_Kabuli_Chr06</i>       | 8010016                        | (T/C)       |
| 9849        | CakSNP9849     | <i>Kabuli</i>    | <i>Ca_Kabuli_Chr06</i>       | 8011685                        | (G/T)       |
| 9850        | CakSNP9850     | <i>Kabuli</i>    | <i>Ca_Kabuli_Chr06</i>       | 8029226                        | (C/T)       |
| 9851        | CakSNP9851     | <i>Kabuli</i>    | <i>Ca_Kabuli_Chr06</i>       | 8041582                        | (A/G)       |
| 9852        | CakSNP9852     | <i>Kabuli</i>    | <i>Ca_Kabuli_Chr06</i>       | 8052987                        | (G/C)       |
| 9853        | CakSNP9853     | <i>Kabuli</i>    | <i>Ca_Kabuli_Chr06</i>       | 8076394                        | (T/C)       |
| 9854        | CakSNP9854     | <i>Kabuli</i>    | <i>Ca_Kabuli_Chr06</i>       | 8076446                        | (G/A)       |
| 9855        | CakSNP9855     | <i>Kabuli</i>    | <i>Ca_Kabuli_Chr06</i>       | 8081800                        | (C/G)       |
| 9856        | CakSNP9856     | <i>Kabuli</i>    | <i>Ca_Kabuli_Chr06</i>       | 8084950                        | (T/A)       |
| 9857        | CakSNP9857     | <i>Kabuli</i>    | <i>Ca_Kabuli_Chr06</i>       | 8090739                        | (T/A)       |
| 9858        | CakSNP9858     | <i>Kabuli</i>    | <i>Ca_Kabuli_Chr06</i>       | 8090980                        | (A/G)       |
| 9859        | CakSNP9859     | <i>Kabuli</i>    | <i>Ca_Kabuli_Chr06</i>       | 8091050                        | (A/G)       |
| 9860        | CakSNP9860     | <i>Kabuli</i>    | <i>Ca_Kabuli_Chr06</i>       | 8139434                        | (G/A)       |
| 9861        | CakSNP9861     | <i>Kabuli</i>    | <i>Ca_Kabuli_Chr06</i>       | 8139446                        | (C/A)       |
| 9862        | CakSNP9862     | <i>Kabuli</i>    | <i>Ca_Kabuli_Chr06</i>       | 8166317                        | (T/C)       |
| 9863        | CakSNP9863     | <i>Kabuli</i>    | <i>Ca_Kabuli_Chr06</i>       | 8166339                        | (T/C)       |
| 9864        | CakSNP9864     | <i>Kabuli</i>    | <i>Ca_Kabuli_Chr06</i>       | 8166435                        | (A/G)       |
| 9865        | CakSNP9865     | <i>Kabuli</i>    | <i>Ca_Kabuli_Chr06</i>       | 8166462                        | (A/T)       |

| <b>S.N.</b> | <b>SNP IDs</b> | <b>Cultivars</b> | <b>Chromosomes/scaffolds</b> | <b>Physical positions (bp)</b> | <b>SNPs</b> |
|-------------|----------------|------------------|------------------------------|--------------------------------|-------------|
| 9866        | CakSNP9866     | <i>Kabuli</i>    | <i>Ca_Kabuli_Chr06</i>       | 8170583                        | (C/T)       |
| 9867        | CakSNP9867     | <i>Kabuli</i>    | <i>Ca_Kabuli_Chr06</i>       | 8170633                        | (A/G)       |
| 9868        | CakSNP9868     | <i>Kabuli</i>    | <i>Ca_Kabuli_Chr06</i>       | 8179815                        | (T/C)       |
| 9869        | CakSNP9869     | <i>Kabuli</i>    | <i>Ca_Kabuli_Chr06</i>       | 8179797                        | (C/T)       |
| 9870        | CakSNP9870     | <i>Kabuli</i>    | <i>Ca_Kabuli_Chr06</i>       | 8221204                        | (C/A)       |
| 9871        | CakSNP9871     | <i>Kabuli</i>    | <i>Ca_Kabuli_Chr06</i>       | 8222666                        | (T/C)       |
| 9872        | CakSNP9872     | <i>Kabuli</i>    | <i>Ca_Kabuli_Chr06</i>       | 8222685                        | (A/T)       |
| 9873        | CakSNP9873     | <i>Kabuli</i>    | <i>Ca_Kabuli_Chr06</i>       | 8223986                        | (C/G)       |
| 9874        | CakSNP9874     | <i>Kabuli</i>    | <i>Ca_Kabuli_Chr06</i>       | 8237286                        | (A/G)       |
| 9875        | CakSNP9875     | <i>Kabuli</i>    | <i>Ca_Kabuli_Chr06</i>       | 8243936                        | (A/T)       |
| 9876        | CakSNP9876     | <i>Kabuli</i>    | <i>Ca_Kabuli_Chr06</i>       | 8243947                        | (T/C)       |
| 9877        | CakSNP9877     | <i>Kabuli</i>    | <i>Ca_Kabuli_Chr06</i>       | 8244152                        | (C/T)       |
| 9878        | CakSNP9878     | <i>Kabuli</i>    | <i>Ca_Kabuli_Chr06</i>       | 8244249                        | (C/T)       |
| 9879        | CakSNP9879     | <i>Kabuli</i>    | <i>Ca_Kabuli_Chr06</i>       | 8246037                        | (T/C)       |
| 9880        | CakSNP9880     | <i>Kabuli</i>    | <i>Ca_Kabuli_Chr06</i>       | 8246187                        | (A/C)       |
| 9881        | CakSNP9881     | <i>Kabuli</i>    | <i>Ca_Kabuli_Chr06</i>       | 8248202                        | (A/C)       |
| 9882        | CakSNP9882     | <i>Kabuli</i>    | <i>Ca_Kabuli_Chr06</i>       | 8251365                        | (T/C)       |
| 9883        | CakSNP9883     | <i>Kabuli</i>    | <i>Ca_Kabuli_Chr06</i>       | 8269326                        | (A/C)       |
| 9884        | CakSNP9884     | <i>Kabuli</i>    | <i>Ca_Kabuli_Chr06</i>       | 8285170                        | (G/A)       |
| 9885        | CakSNP9885     | <i>Kabuli</i>    | <i>Ca_Kabuli_Chr06</i>       | 8285147                        | (A/G)       |
| 9886        | CakSNP9886     | <i>Kabuli</i>    | <i>Ca_Kabuli_Chr06</i>       | 8633231                        | (C/A)       |
| 9887        | CakSNP9887     | <i>Kabuli</i>    | <i>Ca_Kabuli_Chr06</i>       | 8633215                        | (C/A)       |
| 9888        | CakSNP9888     | <i>Kabuli</i>    | <i>Ca_Kabuli_Chr06</i>       | 8633187                        | (A/C)       |
| 9889        | CakSNP9889     | <i>Kabuli</i>    | <i>Ca_Kabuli_Chr06</i>       | 8634513                        | (G/A)       |
| 9890        | CakSNP9890     | <i>Kabuli</i>    | <i>Ca_Kabuli_Chr06</i>       | 8634494                        | (T/C)       |
| 9891        | CakSNP9891     | <i>Kabuli</i>    | <i>Ca_Kabuli_Chr06</i>       | 8643286                        | (T/C)       |
| 9892        | CakSNP9892     | <i>Kabuli</i>    | <i>Ca_Kabuli_Chr06</i>       | 8645079                        | (A/G)       |
| 9893        | CakSNP9893     | <i>Kabuli</i>    | <i>Ca_Kabuli_Chr06</i>       | 8710064                        | (A/T)       |
| 9894        | CakSNP9894     | <i>Kabuli</i>    | <i>Ca_Kabuli_Chr06</i>       | 8787556                        | (C/T)       |
| 9895        | CakSNP9895     | <i>Kabuli</i>    | <i>Ca_Kabuli_Chr06</i>       | 8787557                        | (T/C)       |
| 9896        | CakSNP9896     | <i>Kabuli</i>    | <i>Ca_Kabuli_Chr06</i>       | 8787562                        | (C/T)       |
| 9897        | CakSNP9897     | <i>Kabuli</i>    | <i>Ca_Kabuli_Chr06</i>       | 8787564                        | (G/T)       |
| 9898        | CakSNP9898     | <i>Kabuli</i>    | <i>Ca_Kabuli_Chr06</i>       | 8787568                        | (G/T)       |
| 9899        | CakSNP9899     | <i>Kabuli</i>    | <i>Ca_Kabuli_Chr06</i>       | 8787572                        | (T/A)       |
| 9900        | CakSNP9900     | <i>Kabuli</i>    | <i>Ca_Kabuli_Chr06</i>       | 8787573                        | (G/A)       |
| 9901        | CakSNP9901     | <i>Kabuli</i>    | <i>Ca_Kabuli_Chr06</i>       | 8794430                        | (A/G)       |
| 9902        | CakSNP9902     | <i>Kabuli</i>    | <i>Ca_Kabuli_Chr06</i>       | 8794552                        | (C/G)       |
| 9903        | CakSNP9903     | <i>Kabuli</i>    | <i>Ca_Kabuli_Chr06</i>       | 8890548                        | (A/G)       |
| 9904        | CakSNP9904     | <i>Kabuli</i>    | <i>Ca_Kabuli_Chr06</i>       | 8890552                        | (C/G)       |

| <b>S.N.</b> | <b>SNP IDs</b> | <b>Cultivars</b> | <b>Chromosomes/scaffolds</b> | <b>Physical positions (bp)</b> | <b>SNPs</b> |
|-------------|----------------|------------------|------------------------------|--------------------------------|-------------|
| 9905        | CakSNP9905     | <i>Kabuli</i>    | <i>Ca_Kabuli_Chr06</i>       | 8893216                        | (A/G)       |
| 9906        | CakSNP9906     | <i>Kabuli</i>    | <i>Ca_Kabuli_Chr06</i>       | 8968068                        | (G/A)       |
| 9907        | CakSNP9907     | <i>Kabuli</i>    | <i>Ca_Kabuli_Chr06</i>       | 8969711                        | (C/T)       |
| 9908        | CakSNP9908     | <i>Kabuli</i>    | <i>Ca_Kabuli_Chr06</i>       | 8969725                        | (C/A)       |
| 9909        | CakSNP9909     | <i>Kabuli</i>    | <i>Ca_Kabuli_Chr06</i>       | 9053279                        | (A/G)       |
| 9910        | CakSNP9910     | <i>Kabuli</i>    | <i>Ca_Kabuli_Chr06</i>       | 9054596                        | (T/C)       |
| 9911        | CakSNP9911     | <i>Kabuli</i>    | <i>Ca_Kabuli_Chr06</i>       | 9088121                        | (T/C)       |
| 9912        | CakSNP9912     | <i>Kabuli</i>    | <i>Ca_Kabuli_Chr06</i>       | 9088151                        | (G/A)       |
| 9913        | CakSNP9913     | <i>Kabuli</i>    | <i>Ca_Kabuli_Chr06</i>       | 9088163                        | (A/G)       |
| 9914        | CakSNP9914     | <i>Kabuli</i>    | <i>Ca_Kabuli_Chr06</i>       | 9088184                        | (G/A)       |
| 9915        | CakSNP9915     | <i>Kabuli</i>    | <i>Ca_Kabuli_Chr06</i>       | 9088234                        | (A/C)       |
| 9916        | CakSNP9916     | <i>Kabuli</i>    | <i>Ca_Kabuli_Chr06</i>       | 9190620                        | (G/T)       |
| 9917        | CakSNP9917     | <i>Kabuli</i>    | <i>Ca_Kabuli_Chr06</i>       | 9221201                        | (A/G)       |
| 9918        | CakSNP9918     | <i>Kabuli</i>    | <i>Ca_Kabuli_Chr06</i>       | 9227767                        | (C/A)       |
| 9919        | CakSNP9919     | <i>Kabuli</i>    | <i>Ca_Kabuli_Chr06</i>       | 9228004                        | (C/A)       |
| 9920        | CakSNP9920     | <i>Kabuli</i>    | <i>Ca_Kabuli_Chr06</i>       | 9323775                        | (A/G)       |
| 9921        | CakSNP9921     | <i>Kabuli</i>    | <i>Ca_Kabuli_Chr06</i>       | 9324122                        | (A/C)       |
| 9922        | CakSNP9922     | <i>Kabuli</i>    | <i>Ca_Kabuli_Chr06</i>       | 9373240                        | (C/A)       |
| 9923        | CakSNP9923     | <i>Kabuli</i>    | <i>Ca_Kabuli_Chr06</i>       | 9373383                        | (G/C)       |
| 9924        | CakSNP9924     | <i>Kabuli</i>    | <i>Ca_Kabuli_Chr06</i>       | 9378508                        | (A/T)       |
| 9925        | CakSNP9925     | <i>Kabuli</i>    | <i>Ca_Kabuli_Chr06</i>       | 9378557                        | (G/C)       |
| 9926        | CakSNP9926     | <i>Kabuli</i>    | <i>Ca_Kabuli_Chr06</i>       | 9382091                        | (C/T)       |
| 9927        | CakSNP9927     | <i>Kabuli</i>    | <i>Ca_Kabuli_Chr06</i>       | 9423222                        | (T/C)       |
| 9928        | CakSNP9928     | <i>Kabuli</i>    | <i>Ca_Kabuli_Chr06</i>       | 9424317                        | (T/C)       |
| 9929        | CakSNP9929     | <i>Kabuli</i>    | <i>Ca_Kabuli_Chr06</i>       | 9428522                        | (C/T)       |
| 9930        | CakSNP9930     | <i>Kabuli</i>    | <i>Ca_Kabuli_Chr06</i>       | 9428517                        | (G/A)       |
| 9931        | CakSNP9931     | <i>Kabuli</i>    | <i>Ca_Kabuli_Chr06</i>       | 9523228                        | (T/C)       |
| 9932        | CakSNP9932     | <i>Kabuli</i>    | <i>Ca_Kabuli_Chr06</i>       | 9544233                        | (T/C)       |
| 9933        | CakSNP9933     | <i>Kabuli</i>    | <i>Ca_Kabuli_Chr06</i>       | 9565932                        | (A/G)       |
| 9934        | CakSNP9934     | <i>Kabuli</i>    | <i>Ca_Kabuli_Chr06</i>       | 9568243                        | (A/C)       |
| 9935        | CakSNP9935     | <i>Kabuli</i>    | <i>Ca_Kabuli_Chr06</i>       | 9568247                        | (G/A)       |
| 9936        | CakSNP9936     | <i>Kabuli</i>    | <i>Ca_Kabuli_Chr06</i>       | 9568289                        | (A/C)       |
| 9937        | CakSNP9937     | <i>Kabuli</i>    | <i>Ca_Kabuli_Chr06</i>       | 9569170                        | (A/G)       |
| 9938        | CakSNP9938     | <i>Kabuli</i>    | <i>Ca_Kabuli_Chr06</i>       | 9570753                        | (C/T)       |
| 9939        | CakSNP9939     | <i>Kabuli</i>    | <i>Ca_Kabuli_Chr06</i>       | 9617218                        | (A/G)       |
| 9940        | CakSNP9940     | <i>Kabuli</i>    | <i>Ca_Kabuli_Chr06</i>       | 9617233                        | (A/G)       |
| 9941        | CakSNP9941     | <i>Kabuli</i>    | <i>Ca_Kabuli_Chr06</i>       | 9714240                        | (T/C)       |
| 9942        | CakSNP9942     | <i>Kabuli</i>    | <i>Ca_Kabuli_Chr06</i>       | 9728195                        | (G/T)       |
| 9943        | CakSNP9943     | <i>Kabuli</i>    | <i>Ca_Kabuli_Chr06</i>       | 9728181                        | (A/G)       |



| <b>S.N.</b> | <b>SNP IDs</b> | <b>Cultivars</b> | <b>Chromosomes/scaffolds</b> | <b>Physical positions (bp)</b> | <b>SNPs</b> |
|-------------|----------------|------------------|------------------------------|--------------------------------|-------------|
| 9944        | CakSNP9944     | <i>Kabuli</i>    | <i>Ca_Kabuli_Chr06</i>       | 9814378                        | (G/T)       |
| 9945        | CakSNP9945     | <i>Kabuli</i>    | <i>Ca_Kabuli_Chr06</i>       | 9834199                        | (T/C)       |
| 9946        | CakSNP9946     | <i>Kabuli</i>    | <i>Ca_Kabuli_Chr06</i>       | 9834198                        | (C/A)       |
| 9947        | CakSNP9947     | <i>Kabuli</i>    | <i>Ca_Kabuli_Chr06</i>       | 9834187                        | (A/T)       |
| 9948        | CakSNP9948     | <i>Kabuli</i>    | <i>Ca_Kabuli_Chr06</i>       | 9834184                        | (A/T)       |
| 9949        | CakSNP9949     | <i>Kabuli</i>    | <i>Ca_Kabuli_Chr06</i>       | 9834183                        | (C/T)       |
| 9950        | CakSNP9950     | <i>Kabuli</i>    | <i>Ca_Kabuli_Chr06</i>       | 9841836                        | (G/A)       |
| 9951        | CakSNP9951     | <i>Kabuli</i>    | <i>Ca_Kabuli_Chr06</i>       | 9841890                        | (G/A)       |
| 9952        | CakSNP9952     | <i>Kabuli</i>    | <i>Ca_Kabuli_Chr06</i>       | 9845070                        | (C/T)       |
| 9953        | CakSNP9953     | <i>Kabuli</i>    | <i>Ca_Kabuli_Chr06</i>       | 9845076                        | (T/C)       |
| 9954        | CakSNP9954     | <i>Kabuli</i>    | <i>Ca_Kabuli_Chr06</i>       | 9872557                        | (G/A)       |
| 9955        | CakSNP9955     | <i>Kabuli</i>    | <i>Ca_Kabuli_Chr06</i>       | 9872657                        | (C/T)       |
| 9956        | CakSNP9956     | <i>Kabuli</i>    | <i>Ca_Kabuli_Chr06</i>       | 9872988                        | (A/T)       |
| 9957        | CakSNP9957     | <i>Kabuli</i>    | <i>Ca_Kabuli_Chr06</i>       | 9888237                        | (G/A)       |
| 9958        | CakSNP9958     | <i>Kabuli</i>    | <i>Ca_Kabuli_Chr06</i>       | 9938833                        | (T/C)       |
| 9959        | CakSNP9959     | <i>Kabuli</i>    | <i>Ca_Kabuli_Chr06</i>       | 9939017                        | (G/A)       |
| 9960        | CakSNP9960     | <i>Kabuli</i>    | <i>Ca_Kabuli_Chr06</i>       | 9959686                        | (T/C)       |
| 9961        | CakSNP9961     | <i>Kabuli</i>    | <i>Ca_Kabuli_Chr06</i>       | 10020177                       | (C/G)       |
| 9962        | CakSNP9962     | <i>Kabuli</i>    | <i>Ca_Kabuli_Chr06</i>       | 10020187                       | (A/G)       |
| 9963        | CakSNP9963     | <i>Kabuli</i>    | <i>Ca_Kabuli_Chr06</i>       | 10025115                       | (A/C)       |
| 9964        | CakSNP9964     | <i>Kabuli</i>    | <i>Ca_Kabuli_Chr06</i>       | 10025113                       | (C/G)       |
| 9965        | CakSNP9965     | <i>Kabuli</i>    | <i>Ca_Kabuli_Chr06</i>       | 10027019                       | (G/A)       |
| 9966        | CakSNP9966     | <i>Kabuli</i>    | <i>Ca_Kabuli_Chr06</i>       | 10027015                       | (G/C)       |
| 9967        | CakSNP9967     | <i>Kabuli</i>    | <i>Ca_Kabuli_Chr06</i>       | 10028504                       | (A/G)       |
| 9968        | CakSNP9968     | <i>Kabuli</i>    | <i>Ca_Kabuli_Chr06</i>       | 10028508                       | (G/C)       |
| 9969        | CakSNP9969     | <i>Kabuli</i>    | <i>Ca_Kabuli_Chr06</i>       | 10028515                       | (A/G)       |
| 9970        | CakSNP9970     | <i>Kabuli</i>    | <i>Ca_Kabuli_Chr06</i>       | 10045644                       | (A/C)       |
| 9971        | CakSNP9971     | <i>Kabuli</i>    | <i>Ca_Kabuli_Chr06</i>       | 10045844                       | (A/G)       |
| 9972        | CakSNP9972     | <i>Kabuli</i>    | <i>Ca_Kabuli_Chr06</i>       | 10088963                       | (G/T)       |
| 9973        | CakSNP9973     | <i>Kabuli</i>    | <i>Ca_Kabuli_Chr06</i>       | 10088984                       | (A/G)       |
| 9974        | CakSNP9974     | <i>Kabuli</i>    | <i>Ca_Kabuli_Chr06</i>       | 10100863                       | (C/G)       |
| 9975        | CakSNP9975     | <i>Kabuli</i>    | <i>Ca_Kabuli_Chr06</i>       | 10111488                       | (C/G)       |
| 9976        | CakSNP9976     | <i>Kabuli</i>    | <i>Ca_Kabuli_Chr06</i>       | 10111520                       | (G/C)       |
| 9977        | CakSNP9977     | <i>Kabuli</i>    | <i>Ca_Kabuli_Chr06</i>       | 10111870                       | (A/G)       |
| 9978        | CakSNP9978     | <i>Kabuli</i>    | <i>Ca_Kabuli_Chr06</i>       | 10111938                       | (G/T)       |
| 9979        | CakSNP9979     | <i>Kabuli</i>    | <i>Ca_Kabuli_Chr06</i>       | 10116403                       | (A/T)       |
| 9980        | CakSNP9980     | <i>Kabuli</i>    | <i>Ca_Kabuli_Chr06</i>       | 10116475                       | (C/A)       |
| 9981        | CakSNP9981     | <i>Kabuli</i>    | <i>Ca_Kabuli_Chr06</i>       | 10138984                       | (C/T)       |
| 9982        | CakSNP9982     | <i>Kabuli</i>    | <i>Ca_Kabuli_Chr06</i>       | 10151973                       | (A/G)       |

| <b>S.N.</b> | <b>SNP IDs</b> | <b>Cultivars</b> | <b>Chromosomes/scaffolds</b> | <b>Physical positions (bp)</b> | <b>SNPs</b> |
|-------------|----------------|------------------|------------------------------|--------------------------------|-------------|
| 9983        | CakSNP9983     | <i>Kabuli</i>    | <i>Ca_Kabuli_Chr06</i>       | 10151974                       | (A/G)       |
| 9984        | CakSNP9984     | <i>Kabuli</i>    | <i>Ca_Kabuli_Chr06</i>       | 10158850                       | (T/C)       |
| 9985        | CakSNP9985     | <i>Kabuli</i>    | <i>Ca_Kabuli_Chr06</i>       | 10188400                       | (G/T)       |
| 9986        | CakSNP9986     | <i>Kabuli</i>    | <i>Ca_Kabuli_Chr06</i>       | 10191941                       | (A/G)       |
| 9987        | CakSNP9987     | <i>Kabuli</i>    | <i>Ca_Kabuli_Chr06</i>       | 10215262                       | (T/G)       |
| 9988        | CakSNP9988     | <i>Kabuli</i>    | <i>Ca_Kabuli_Chr06</i>       | 10230617                       | (A/G)       |
| 9989        | CakSNP9989     | <i>Kabuli</i>    | <i>Ca_Kabuli_Chr06</i>       | 10230657                       | (A/G)       |
| 9990        | CakSNP9990     | <i>Kabuli</i>    | <i>Ca_Kabuli_Chr06</i>       | 10231092                       | (T/G)       |
| 9991        | CakSNP9991     | <i>Kabuli</i>    | <i>Ca_Kabuli_Chr06</i>       | 10231095                       | (G/T)       |
| 9992        | CakSNP9992     | <i>Kabuli</i>    | <i>Ca_Kabuli_Chr06</i>       | 10234241                       | (A/G)       |
| 9993        | CakSNP9993     | <i>Kabuli</i>    | <i>Ca_Kabuli_Chr06</i>       | 10259614                       | (C/T)       |
| 9994        | CakSNP9994     | <i>Kabuli</i>    | <i>Ca_Kabuli_Chr06</i>       | 10260274                       | (C/T)       |
| 9995        | CakSNP9995     | <i>Kabuli</i>    | <i>Ca_Kabuli_Chr06</i>       | 10314993                       | (C/G)       |
| 9996        | CakSNP9996     | <i>Kabuli</i>    | <i>Ca_Kabuli_Chr06</i>       | 10395411                       | (G/A)       |
| 9997        | CakSNP9997     | <i>Kabuli</i>    | <i>Ca_Kabuli_Chr06</i>       | 10395379                       | (T/C)       |
| 9998        | CakSNP9998     | <i>Kabuli</i>    | <i>Ca_Kabuli_Chr06</i>       | 10395356                       | (T/A)       |
| 9999        | CakSNP9999     | <i>Kabuli</i>    | <i>Ca_Kabuli_Chr06</i>       | 10441736                       | (A/C)       |
| 10000       | CakSNP10000    | <i>Kabuli</i>    | <i>Ca_Kabuli_Chr06</i>       | 10441705                       | (T/C)       |
| 10001       | CakSNP10001    | <i>Kabuli</i>    | <i>Ca_Kabuli_Chr06</i>       | 10442148                       | (A/C)       |
| 10002       | CakSNP10002    | <i>Kabuli</i>    | <i>Ca_Kabuli_Chr06</i>       | 10445185                       | (C/T)       |
| 10003       | CakSNP10003    | <i>Kabuli</i>    | <i>Ca_Kabuli_Chr06</i>       | 10445274                       | (G/A)       |
| 10004       | CakSNP10004    | <i>Kabuli</i>    | <i>Ca_Kabuli_Chr06</i>       | 10456774                       | (A/G)       |
| 10005       | CakSNP10005    | <i>Kabuli</i>    | <i>Ca_Kabuli_Chr06</i>       | 10456854                       | (G/T)       |
| 10006       | CakSNP10006    | <i>Kabuli</i>    | <i>Ca_Kabuli_Chr06</i>       | 10494134                       | (C/T)       |
| 10007       | CakSNP10007    | <i>Kabuli</i>    | <i>Ca_Kabuli_Chr06</i>       | 10494057                       | (C/A)       |
| 10008       | CakSNP10008    | <i>Kabuli</i>    | <i>Ca_Kabuli_Chr06</i>       | 10494055                       | (T/A)       |
| 10009       | CakSNP10009    | <i>Kabuli</i>    | <i>Ca_Kabuli_Chr06</i>       | 10495747                       | (G/T)       |
| 10010       | CakSNP10010    | <i>Kabuli</i>    | <i>Ca_Kabuli_Chr06</i>       | 10495804                       | (C/T)       |
| 10011       | CakSNP10011    | <i>Kabuli</i>    | <i>Ca_Kabuli_Chr06</i>       | 10502381                       | (A/G)       |
| 10012       | CakSNP10012    | <i>Kabuli</i>    | <i>Ca_Kabuli_Chr06</i>       | 10502387                       | (C/A)       |
| 10013       | CakSNP10013    | <i>Kabuli</i>    | <i>Ca_Kabuli_Chr06</i>       | 10510996                       | (T/C)       |
| 10014       | CakSNP10014    | <i>Kabuli</i>    | <i>Ca_Kabuli_Chr06</i>       | 10520958                       | (C/T)       |
| 10015       | CakSNP10015    | <i>Kabuli</i>    | <i>Ca_Kabuli_Chr06</i>       | 10521741                       | (A/T)       |
| 10016       | CakSNP10016    | <i>Kabuli</i>    | <i>Ca_Kabuli_Chr06</i>       | 10531311                       | (A/G)       |
| 10017       | CakSNP10017    | <i>Kabuli</i>    | <i>Ca_Kabuli_Chr06</i>       | 10531399                       | (C/T)       |
| 10018       | CakSNP10018    | <i>Kabuli</i>    | <i>Ca_Kabuli_Chr06</i>       | 10532182                       | (A/T)       |
| 10019       | CakSNP10019    | <i>Kabuli</i>    | <i>Ca_Kabuli_Chr06</i>       | 10532739                       | (A/G)       |
| 10020       | CakSNP10020    | <i>Kabuli</i>    | <i>Ca_Kabuli_Chr06</i>       | 10539918                       | (A/C)       |
| 10021       | CakSNP10021    | <i>Kabuli</i>    | <i>Ca_Kabuli_Chr06</i>       | 10539977                       | (C/T)       |

| <b>S.N.</b> | <b>SNP IDs</b> | <b>Cultivars</b> | <b>Chromosomes/scaffolds</b> | <b>Physical positions (bp)</b> | <b>SNPs</b> |
|-------------|----------------|------------------|------------------------------|--------------------------------|-------------|
| 10022       | CakSNP10022    | <i>Kabuli</i>    | <i>Ca_Kabuli_Chr06</i>       | 10539994                       | (A/C)       |
| 10023       | CakSNP10023    | <i>Kabuli</i>    | <i>Ca_Kabuli_Chr06</i>       | 10567518                       | (A/G)       |
| 10024       | CakSNP10024    | <i>Kabuli</i>    | <i>Ca_Kabuli_Chr06</i>       | 10588030                       | (C/T)       |
| 10025       | CakSNP10025    | <i>Kabuli</i>    | <i>Ca_Kabuli_Chr06</i>       | 10613546                       | (A/G)       |
| 10026       | CakSNP10026    | <i>Kabuli</i>    | <i>Ca_Kabuli_Chr06</i>       | 10613612                       | (A/G)       |
| 10027       | CakSNP10027    | <i>Kabuli</i>    | <i>Ca_Kabuli_Chr06</i>       | 10652739                       | (C/T)       |
| 10028       | CakSNP10028    | <i>Kabuli</i>    | <i>Ca_Kabuli_Chr06</i>       | 10667504                       | (A/T)       |
| 10029       | CakSNP10029    | <i>Kabuli</i>    | <i>Ca_Kabuli_Chr06</i>       | 10667559                       | (T/C)       |
| 10030       | CakSNP10030    | <i>Kabuli</i>    | <i>Ca_Kabuli_Chr06</i>       | 10667640                       | (T/G)       |
| 10031       | CakSNP10031    | <i>Kabuli</i>    | <i>Ca_Kabuli_Chr06</i>       | 10670343                       | (G/A)       |
| 10032       | CakSNP10032    | <i>Kabuli</i>    | <i>Ca_Kabuli_Chr06</i>       | 10670368                       | (G/A)       |
| 10033       | CakSNP10033    | <i>Kabuli</i>    | <i>Ca_Kabuli_Chr06</i>       | 10670409                       | (G/A)       |
| 10034       | CakSNP10034    | <i>Kabuli</i>    | <i>Ca_Kabuli_Chr06</i>       | 10670412                       | (A/C)       |
| 10035       | CakSNP10035    | <i>Kabuli</i>    | <i>Ca_Kabuli_Chr06</i>       | 10670482                       | (C/T)       |
| 10036       | CakSNP10036    | <i>Kabuli</i>    | <i>Ca_Kabuli_Chr06</i>       | 10670582                       | (G/A)       |
| 10037       | CakSNP10037    | <i>Kabuli</i>    | <i>Ca_Kabuli_Chr06</i>       | 10670675                       | (C/T)       |
| 10038       | CakSNP10038    | <i>Kabuli</i>    | <i>Ca_Kabuli_Chr06</i>       | 10670694                       | (G/A)       |
| 10039       | CakSNP10039    | <i>Kabuli</i>    | <i>Ca_Kabuli_Chr06</i>       | 10670773                       | (A/C)       |
| 10040       | CakSNP10040    | <i>Kabuli</i>    | <i>Ca_Kabuli_Chr06</i>       | 10670959                       | (T/C)       |
| 10041       | CakSNP10041    | <i>Kabuli</i>    | <i>Ca_Kabuli_Chr06</i>       | 10671458                       | (T/C)       |
| 10042       | CakSNP10042    | <i>Kabuli</i>    | <i>Ca_Kabuli_Chr06</i>       | 10671444                       | (A/C)       |
| 10043       | CakSNP10043    | <i>Kabuli</i>    | <i>Ca_Kabuli_Chr06</i>       | 10672468                       | (C/T)       |
| 10044       | CakSNP10044    | <i>Kabuli</i>    | <i>Ca_Kabuli_Chr06</i>       | 10677469                       | (A/G)       |
| 10045       | CakSNP10045    | <i>Kabuli</i>    | <i>Ca_Kabuli_Chr06</i>       | 10677501                       | (C/T)       |
| 10046       | CakSNP10046    | <i>Kabuli</i>    | <i>Ca_Kabuli_Chr06</i>       | 10682221                       | (G/T)       |
| 10047       | CakSNP10047    | <i>Kabuli</i>    | <i>Ca_Kabuli_Chr06</i>       | 10682201                       | (C/G)       |
| 10048       | CakSNP10048    | <i>Kabuli</i>    | <i>Ca_Kabuli_Chr06</i>       | 10683193                       | (C/T)       |
| 10049       | CakSNP10049    | <i>Kabuli</i>    | <i>Ca_Kabuli_Chr06</i>       | 10696986                       | (A/T)       |
| 10050       | CakSNP10050    | <i>Kabuli</i>    | <i>Ca_Kabuli_Chr06</i>       | 10696990                       | (T/C)       |
| 10051       | CakSNP10051    | <i>Kabuli</i>    | <i>Ca_Kabuli_Chr06</i>       | 10697064                       | (T/A)       |
| 10052       | CakSNP10052    | <i>Kabuli</i>    | <i>Ca_Kabuli_Chr06</i>       | 10716986                       | (G/A)       |
| 10053       | CakSNP10053    | <i>Kabuli</i>    | <i>Ca_Kabuli_Chr06</i>       | 10716968                       | (G/A)       |
| 10054       | CakSNP10054    | <i>Kabuli</i>    | <i>Ca_Kabuli_Chr06</i>       | 10744029                       | (C/A)       |
| 10055       | CakSNP10055    | <i>Kabuli</i>    | <i>Ca_Kabuli_Chr06</i>       | 10743996                       | (A/T)       |
| 10056       | CakSNP10056    | <i>Kabuli</i>    | <i>Ca_Kabuli_Chr06</i>       | 10748965                       | (G/T)       |
| 10057       | CakSNP10057    | <i>Kabuli</i>    | <i>Ca_Kabuli_Chr06</i>       | 10779368                       | (G/C)       |
| 10058       | CakSNP10058    | <i>Kabuli</i>    | <i>Ca_Kabuli_Chr06</i>       | 10779465                       | (A/T)       |
| 10059       | CakSNP10059    | <i>Kabuli</i>    | <i>Ca_Kabuli_Chr06</i>       | 10779547                       | (T/G)       |
| 10060       | CakSNP10060    | <i>Kabuli</i>    | <i>Ca_Kabuli_Chr06</i>       | 10779636                       | (C/A)       |

| <b>S.N.</b> | <b>SNP IDs</b> | <b>Cultivars</b> | <b>Chromosomes/scaffolds</b> | <b>Physical positions (bp)</b> | <b>SNPs</b> |
|-------------|----------------|------------------|------------------------------|--------------------------------|-------------|
| 10061       | CakSNP10061    | <i>Kabuli</i>    | <i>Ca_Kabuli_Chr06</i>       | 10785480                       | (T/G)       |
| 10062       | CakSNP10062    | <i>Kabuli</i>    | <i>Ca_Kabuli_Chr06</i>       | 10870187                       | (T/G)       |
| 10063       | CakSNP10063    | <i>Kabuli</i>    | <i>Ca_Kabuli_Chr06</i>       | 10870534                       | (A/G)       |
| 10064       | CakSNP10064    | <i>Kabuli</i>    | <i>Ca_Kabuli_Chr06</i>       | 10880791                       | (C/T)       |
| 10065       | CakSNP10065    | <i>Kabuli</i>    | <i>Ca_Kabuli_Chr06</i>       | 10880819                       | (T/G)       |
| 10066       | CakSNP10066    | <i>Kabuli</i>    | <i>Ca_Kabuli_Chr06</i>       | 10881002                       | (A/G)       |
| 10067       | CakSNP10067    | <i>Kabuli</i>    | <i>Ca_Kabuli_Chr06</i>       | 10880985                       | (C/T)       |
| 10068       | CakSNP10068    | <i>Kabuli</i>    | <i>Ca_Kabuli_Chr06</i>       | 10880962                       | (G/T)       |
| 10069       | CakSNP10069    | <i>Kabuli</i>    | <i>Ca_Kabuli_Chr06</i>       | 10991652                       | (C/A)       |
| 10070       | CakSNP10070    | <i>Kabuli</i>    | <i>Ca_Kabuli_Chr06</i>       | 10991717                       | (T/A)       |
| 10071       | CakSNP10071    | <i>Kabuli</i>    | <i>Ca_Kabuli_Chr06</i>       | 10991737                       | (A/C)       |
| 10072       | CakSNP10072    | <i>Kabuli</i>    | <i>Ca_Kabuli_Chr06</i>       | 11011847                       | (C/G)       |
| 10073       | CakSNP10073    | <i>Kabuli</i>    | <i>Ca_Kabuli_Chr06</i>       | 11128158                       | (A/G)       |
| 10074       | CakSNP10074    | <i>Kabuli</i>    | <i>Ca_Kabuli_Chr06</i>       | 11128170                       | (T/C)       |
| 10075       | CakSNP10075    | <i>Kabuli</i>    | <i>Ca_Kabuli_Chr06</i>       | 11128204                       | (G/A)       |
| 10076       | CakSNP10076    | <i>Kabuli</i>    | <i>Ca_Kabuli_Chr06</i>       | 11131010                       | (T/A)       |
| 10077       | CakSNP10077    | <i>Kabuli</i>    | <i>Ca_Kabuli_Chr06</i>       | 11131464                       | (G/A)       |
| 10078       | CakSNP10078    | <i>Kabuli</i>    | <i>Ca_Kabuli_Chr06</i>       | 11131462                       | (G/A)       |
| 10079       | CakSNP10079    | <i>Kabuli</i>    | <i>Ca_Kabuli_Chr06</i>       | 11131436                       | (T/G)       |
| 10080       | CakSNP10080    | <i>Kabuli</i>    | <i>Ca_Kabuli_Chr06</i>       | 11163819                       | (T/G)       |
| 10081       | CakSNP10081    | <i>Kabuli</i>    | <i>Ca_Kabuli_Chr06</i>       | 11163822                       | (C/T)       |
| 10082       | CakSNP10082    | <i>Kabuli</i>    | <i>Ca_Kabuli_Chr06</i>       | 11163836                       | (C/T)       |
| 10083       | CakSNP10083    | <i>Kabuli</i>    | <i>Ca_Kabuli_Chr06</i>       | 11188803                       | (G/A)       |
| 10084       | CakSNP10084    | <i>Kabuli</i>    | <i>Ca_Kabuli_Chr06</i>       | 11189051                       | (A/G)       |
| 10085       | CakSNP10085    | <i>Kabuli</i>    | <i>Ca_Kabuli_Chr06</i>       | 11229102                       | (C/T)       |
| 10086       | CakSNP10086    | <i>Kabuli</i>    | <i>Ca_Kabuli_Chr06</i>       | 11229143                       | (A/C)       |
| 10087       | CakSNP10087    | <i>Kabuli</i>    | <i>Ca_Kabuli_Chr06</i>       | 11229302                       | (A/G)       |
| 10088       | CakSNP10088    | <i>Kabuli</i>    | <i>Ca_Kabuli_Chr06</i>       | 11229388                       | (C/T)       |
| 10089       | CakSNP10089    | <i>Kabuli</i>    | <i>Ca_Kabuli_Chr06</i>       | 11285884                       | (G/A)       |
| 10090       | CakSNP10090    | <i>Kabuli</i>    | <i>Ca_Kabuli_Chr06</i>       | 11300597                       | (C/T)       |
| 10091       | CakSNP10091    | <i>Kabuli</i>    | <i>Ca_Kabuli_Chr06</i>       | 11300549                       | (A/C)       |
| 10092       | CakSNP10092    | <i>Kabuli</i>    | <i>Ca_Kabuli_Chr06</i>       | 11302037                       | (A/C)       |
| 10093       | CakSNP10093    | <i>Kabuli</i>    | <i>Ca_Kabuli_Chr06</i>       | 11302033                       | (T/C)       |
| 10094       | CakSNP10094    | <i>Kabuli</i>    | <i>Ca_Kabuli_Chr06</i>       | 11314581                       | (T/C)       |
| 10095       | CakSNP10095    | <i>Kabuli</i>    | <i>Ca_Kabuli_Chr06</i>       | 11394963                       | (A/G)       |
| 10096       | CakSNP10096    | <i>Kabuli</i>    | <i>Ca_Kabuli_Chr06</i>       | 11395330                       | (C/T)       |
| 10097       | CakSNP10097    | <i>Kabuli</i>    | <i>Ca_Kabuli_Chr06</i>       | 11508828                       | (C/T)       |
| 10098       | CakSNP10098    | <i>Kabuli</i>    | <i>Ca_Kabuli_Chr06</i>       | 11508824                       | (T/G)       |
| 10099       | CakSNP10099    | <i>Kabuli</i>    | <i>Ca_Kabuli_Chr06</i>       | 11508817                       | (G/A)       |

| <b>S.N.</b> | <b>SNP IDs</b> | <b>Cultivars</b> | <b>Chromosomes/scaffolds</b> | <b>Physical positions (bp)</b> | <b>SNPs</b> |
|-------------|----------------|------------------|------------------------------|--------------------------------|-------------|
| 10100       | CakSNP10100    | <i>Kabuli</i>    | <i>Ca_Kabuli_Chr06</i>       | 11508816                       | (A/C)       |
| 10101       | CakSNP10101    | <i>Kabuli</i>    | <i>Ca_Kabuli_Chr06</i>       | 11514926                       | (T/C)       |
| 10102       | CakSNP10102    | <i>Kabuli</i>    | <i>Ca_Kabuli_Chr06</i>       | 11514883                       | (C/T)       |
| 10103       | CakSNP10103    | <i>Kabuli</i>    | <i>Ca_Kabuli_Chr06</i>       | 11514935                       | (G/A)       |
| 10104       | CakSNP10104    | <i>Kabuli</i>    | <i>Ca_Kabuli_Chr06</i>       | 11543615                       | (G/C)       |
| 10105       | CakSNP10105    | <i>Kabuli</i>    | <i>Ca_Kabuli_Chr06</i>       | 11543618                       | (T/G)       |
| 10106       | CakSNP10106    | <i>Kabuli</i>    | <i>Ca_Kabuli_Chr06</i>       | 11665233                       | (G/A)       |
| 10107       | CakSNP10107    | <i>Kabuli</i>    | <i>Ca_Kabuli_Chr06</i>       | 11665338                       | (T/G)       |
| 10108       | CakSNP10108    | <i>Kabuli</i>    | <i>Ca_Kabuli_Chr06</i>       | 12408955                       | (A/G)       |
| 10109       | CakSNP10109    | <i>Kabuli</i>    | <i>Ca_Kabuli_Chr06</i>       | 12408964                       | (G/C)       |
| 10110       | CakSNP10110    | <i>Kabuli</i>    | <i>Ca_Kabuli_Chr06</i>       | 12434183                       | (G/T)       |
| 10111       | CakSNP10111    | <i>Kabuli</i>    | <i>Ca_Kabuli_Chr06</i>       | 12437275                       | (A/T)       |
| 10112       | CakSNP10112    | <i>Kabuli</i>    | <i>Ca_Kabuli_Chr06</i>       | 12437285                       | (A/G)       |
| 10113       | CakSNP10113    | <i>Kabuli</i>    | <i>Ca_Kabuli_Chr06</i>       | 12437288                       | (G/A)       |
| 10114       | CakSNP10114    | <i>Kabuli</i>    | <i>Ca_Kabuli_Chr06</i>       | 12437319                       | (C/T)       |
| 10115       | CakSNP10115    | <i>Kabuli</i>    | <i>Ca_Kabuli_Chr06</i>       | 12494824                       | (G/T)       |
| 10116       | CakSNP10116    | <i>Kabuli</i>    | <i>Ca_Kabuli_Chr06</i>       | 12494972                       | (A/G)       |
| 10117       | CakSNP10117    | <i>Kabuli</i>    | <i>Ca_Kabuli_Chr06</i>       | 12532947                       | (T/A)       |
| 10118       | CakSNP10118    | <i>Kabuli</i>    | <i>Ca_Kabuli_Chr06</i>       | 12535733                       | (C/G)       |
| 10119       | CakSNP10119    | <i>Kabuli</i>    | <i>Ca_Kabuli_Chr06</i>       | 12619757                       | (C/T)       |
| 10120       | CakSNP10120    | <i>Kabuli</i>    | <i>Ca_Kabuli_Chr06</i>       | 12619786                       | (C/A)       |
| 10121       | CakSNP10121    | <i>Kabuli</i>    | <i>Ca_Kabuli_Chr06</i>       | 12619829                       | (A/T)       |
| 10122       | CakSNP10122    | <i>Kabuli</i>    | <i>Ca_Kabuli_Chr06</i>       | 12647539                       | (G/A)       |
| 10123       | CakSNP10123    | <i>Kabuli</i>    | <i>Ca_Kabuli_Chr06</i>       | 12799890                       | (T/G)       |
| 10124       | CakSNP10124    | <i>Kabuli</i>    | <i>Ca_Kabuli_Chr06</i>       | 12844524                       | (G/A)       |
| 10125       | CakSNP10125    | <i>Kabuli</i>    | <i>Ca_Kabuli_Chr06</i>       | 12893335                       | (C/A)       |
| 10126       | CakSNP10126    | <i>Kabuli</i>    | <i>Ca_Kabuli_Chr06</i>       | 12893424                       | (C/T)       |
| 10127       | CakSNP10127    | <i>Kabuli</i>    | <i>Ca_Kabuli_Chr06</i>       | 12906599                       | (G/A)       |
| 10128       | CakSNP10128    | <i>Kabuli</i>    | <i>Ca_Kabuli_Chr06</i>       | 12906680                       | (T/C)       |
| 10129       | CakSNP10129    | <i>Kabuli</i>    | <i>Ca_Kabuli_Chr06</i>       | 12906669                       | (G/A)       |
| 10130       | CakSNP10130    | <i>Kabuli</i>    | <i>Ca_Kabuli_Chr06</i>       | 12973765                       | (A/G)       |
| 10131       | CakSNP10131    | <i>Kabuli</i>    | <i>Ca_Kabuli_Chr06</i>       | 12976279                       | (T/A)       |
| 10132       | CakSNP10132    | <i>Kabuli</i>    | <i>Ca_Kabuli_Chr06</i>       | 12977129                       | (A/G)       |
| 10133       | CakSNP10133    | <i>Kabuli</i>    | <i>Ca_Kabuli_Chr06</i>       | 12977196                       | (A/G)       |
| 10134       | CakSNP10134    | <i>Kabuli</i>    | <i>Ca_Kabuli_Chr06</i>       | 12977204                       | (T/G)       |
| 10135       | CakSNP10135    | <i>Kabuli</i>    | <i>Ca_Kabuli_Chr06</i>       | 12985896                       | (A/C)       |
| 10136       | CakSNP10136    | <i>Kabuli</i>    | <i>Ca_Kabuli_Chr06</i>       | 12985908                       | (C/G)       |
| 10137       | CakSNP10137    | <i>Kabuli</i>    | <i>Ca_Kabuli_Chr06</i>       | 12985910                       | (C/T)       |
| 10138       | CakSNP10138    | <i>Kabuli</i>    | <i>Ca_Kabuli_Chr06</i>       | 12986776                       | (A/G)       |

| <b>S.N.</b> | <b>SNP IDs</b> | <b>Cultivars</b> | <b>Chromosomes/scaffolds</b> | <b>Physical positions (bp)</b> | <b>SNPs</b> |
|-------------|----------------|------------------|------------------------------|--------------------------------|-------------|
| 10139       | CakSNP10139    | <i>Kabuli</i>    | <i>Ca_Kabuli_Chr06</i>       | 12986833                       | (A/C)       |
| 10140       | CakSNP10140    | <i>Kabuli</i>    | <i>Ca_Kabuli_Chr06</i>       | 13008333                       | (A/T)       |
| 10141       | CakSNP10141    | <i>Kabuli</i>    | <i>Ca_Kabuli_Chr06</i>       | 13008360                       | (C/T)       |
| 10142       | CakSNP10142    | <i>Kabuli</i>    | <i>Ca_Kabuli_Chr06</i>       | 13008465                       | (C/T)       |
| 10143       | CakSNP10143    | <i>Kabuli</i>    | <i>Ca_Kabuli_Chr06</i>       | 13099658                       | (G/T)       |
| 10144       | CakSNP10144    | <i>Kabuli</i>    | <i>Ca_Kabuli_Chr06</i>       | 13099656                       | (G/T)       |
| 10145       | CakSNP10145    | <i>Kabuli</i>    | <i>Ca_Kabuli_Chr06</i>       | 13107887                       | (C/T)       |
| 10146       | CakSNP10146    | <i>Kabuli</i>    | <i>Ca_Kabuli_Chr06</i>       | 13117820                       | (A/T)       |
| 10147       | CakSNP10147    | <i>Kabuli</i>    | <i>Ca_Kabuli_Chr06</i>       | 13131682                       | (C/G)       |
| 10148       | CakSNP10148    | <i>Kabuli</i>    | <i>Ca_Kabuli_Chr06</i>       | 13136852                       | (C/T)       |
| 10149       | CakSNP10149    | <i>Kabuli</i>    | <i>Ca_Kabuli_Chr06</i>       | 13136835                       | (C/T)       |
| 10150       | CakSNP10150    | <i>Kabuli</i>    | <i>Ca_Kabuli_Chr06</i>       | 13136976                       | (A/G)       |
| 10151       | CakSNP10151    | <i>Kabuli</i>    | <i>Ca_Kabuli_Chr06</i>       | 13136955                       | (G/A)       |
| 10152       | CakSNP10152    | <i>Kabuli</i>    | <i>Ca_Kabuli_Chr06</i>       | 13187706                       | (A/G)       |
| 10153       | CakSNP10153    | <i>Kabuli</i>    | <i>Ca_Kabuli_Chr06</i>       | 13187709                       | (T/C)       |
| 10154       | CakSNP10154    | <i>Kabuli</i>    | <i>Ca_Kabuli_Chr06</i>       | 13188124                       | (G/C)       |
| 10155       | CakSNP10155    | <i>Kabuli</i>    | <i>Ca_Kabuli_Chr06</i>       | 13188119                       | (A/C)       |
| 10156       | CakSNP10156    | <i>Kabuli</i>    | <i>Ca_Kabuli_Chr06</i>       | 13188480                       | (T/C)       |
| 10157       | CakSNP10157    | <i>Kabuli</i>    | <i>Ca_Kabuli_Chr06</i>       | 13192177                       | (G/A)       |
| 10158       | CakSNP10158    | <i>Kabuli</i>    | <i>Ca_Kabuli_Chr06</i>       | 13243282                       | (A/G)       |
| 10159       | CakSNP10159    | <i>Kabuli</i>    | <i>Ca_Kabuli_Chr06</i>       | 13252152                       | (C/T)       |
| 10160       | CakSNP10160    | <i>Kabuli</i>    | <i>Ca_Kabuli_Chr06</i>       | 13296128                       | (G/A)       |
| 10161       | CakSNP10161    | <i>Kabuli</i>    | <i>Ca_Kabuli_Chr06</i>       | 13326969                       | (C/G)       |
| 10162       | CakSNP10162    | <i>Kabuli</i>    | <i>Ca_Kabuli_Chr06</i>       | 13340012                       | (A/G)       |
| 10163       | CakSNP10163    | <i>Kabuli</i>    | <i>Ca_Kabuli_Chr06</i>       | 13340757                       | (T/C)       |
| 10164       | CakSNP10164    | <i>Kabuli</i>    | <i>Ca_Kabuli_Chr06</i>       | 13340762                       | (G/A)       |
| 10165       | CakSNP10165    | <i>Kabuli</i>    | <i>Ca_Kabuli_Chr06</i>       | 13340782                       | (G/A)       |
| 10166       | CakSNP10166    | <i>Kabuli</i>    | <i>Ca_Kabuli_Chr06</i>       | 13413848                       | (C/G)       |
| 10167       | CakSNP10167    | <i>Kabuli</i>    | <i>Ca_Kabuli_Chr06</i>       | 13483841                       | (T/G)       |
| 10168       | CakSNP10168    | <i>Kabuli</i>    | <i>Ca_Kabuli_Chr06</i>       | 13565854                       | (T/C)       |
| 10169       | CakSNP10169    | <i>Kabuli</i>    | <i>Ca_Kabuli_Chr06</i>       | 13565990                       | (C/T)       |
| 10170       | CakSNP10170    | <i>Kabuli</i>    | <i>Ca_Kabuli_Chr06</i>       | 13566007                       | (C/T)       |
| 10171       | CakSNP10171    | <i>Kabuli</i>    | <i>Ca_Kabuli_Chr06</i>       | 13566012                       | (T/G)       |
| 10172       | CakSNP10172    | <i>Kabuli</i>    | <i>Ca_Kabuli_Chr06</i>       | 13566041                       | (C/T)       |
| 10173       | CakSNP10173    | <i>Kabuli</i>    | <i>Ca_Kabuli_Chr06</i>       | 13566110                       | (A/G)       |
| 10174       | CakSNP10174    | <i>Kabuli</i>    | <i>Ca_Kabuli_Chr06</i>       | 13566136                       | (A/C)       |
| 10175       | CakSNP10175    | <i>Kabuli</i>    | <i>Ca_Kabuli_Chr06</i>       | 13566130                       | (G/T)       |
| 10176       | CakSNP10176    | <i>Kabuli</i>    | <i>Ca_Kabuli_Chr06</i>       | 13572236                       | (A/T)       |
| 10177       | CakSNP10177    | <i>Kabuli</i>    | <i>Ca_Kabuli_Chr06</i>       | 13572221                       | (A/C)       |

| <b>S.N.</b> | <b>SNP IDs</b> | <b>Cultivars</b> | <b>Chromosomes/scaffolds</b> | <b>Physical positions (bp)</b> | <b>SNPs</b> |
|-------------|----------------|------------------|------------------------------|--------------------------------|-------------|
| 10178       | CakSNP10178    | <i>Kabuli</i>    | <i>Ca_Kabuli_Chr06</i>       | 13576963                       | (T/A)       |
| 10179       | CakSNP10179    | <i>Kabuli</i>    | <i>Ca_Kabuli_Chr06</i>       | 13591590                       | (T/G)       |
| 10180       | CakSNP10180    | <i>Kabuli</i>    | <i>Ca_Kabuli_Chr06</i>       | 13593544                       | (A/G)       |
| 10181       | CakSNP10181    | <i>Kabuli</i>    | <i>Ca_Kabuli_Chr06</i>       | 13593564                       | (C/A)       |
| 10182       | CakSNP10182    | <i>Kabuli</i>    | <i>Ca_Kabuli_Chr06</i>       | 13593600                       | (T/C)       |
| 10183       | CakSNP10183    | <i>Kabuli</i>    | <i>Ca_Kabuli_Chr06</i>       | 13593685                       | (G/A)       |
| 10184       | CakSNP10184    | <i>Kabuli</i>    | <i>Ca_Kabuli_Chr06</i>       | 13593668                       | (A/G)       |
| 10185       | CakSNP10185    | <i>Kabuli</i>    | <i>Ca_Kabuli_Chr06</i>       | 13593661                       | (T/C)       |
| 10186       | CakSNP10186    | <i>Kabuli</i>    | <i>Ca_Kabuli_Chr06</i>       | 13593654                       | (T/C)       |
| 10187       | CakSNP10187    | <i>Kabuli</i>    | <i>Ca_Kabuli_Chr06</i>       | 13619538                       | (C/T)       |
| 10188       | CakSNP10188    | <i>Kabuli</i>    | <i>Ca_Kabuli_Chr06</i>       | 13619555                       | (C/T)       |
| 10189       | CakSNP10189    | <i>Kabuli</i>    | <i>Ca_Kabuli_Chr06</i>       | 13619560                       | (T/G)       |
| 10190       | CakSNP10190    | <i>Kabuli</i>    | <i>Ca_Kabuli_Chr06</i>       | 13619589                       | (C/T)       |
| 10191       | CakSNP10191    | <i>Kabuli</i>    | <i>Ca_Kabuli_Chr06</i>       | 13619658                       | (A/G)       |
| 10192       | CakSNP10192    | <i>Kabuli</i>    | <i>Ca_Kabuli_Chr06</i>       | 13619684                       | (A/C)       |
| 10193       | CakSNP10193    | <i>Kabuli</i>    | <i>Ca_Kabuli_Chr06</i>       | 13622292                       | (C/T)       |
| 10194       | CakSNP10194    | <i>Kabuli</i>    | <i>Ca_Kabuli_Chr06</i>       | 13625388                       | (A/G)       |
| 10195       | CakSNP10195    | <i>Kabuli</i>    | <i>Ca_Kabuli_Chr06</i>       | 13637387                       | (T/G)       |
| 10196       | CakSNP10196    | <i>Kabuli</i>    | <i>Ca_Kabuli_Chr06</i>       | 13637347                       | (C/T)       |
| 10197       | CakSNP10197    | <i>Kabuli</i>    | <i>Ca_Kabuli_Chr06</i>       | 13668916                       | (T/A)       |
| 10198       | CakSNP10198    | <i>Kabuli</i>    | <i>Ca_Kabuli_Chr06</i>       | 13668995                       | (A/G)       |
| 10199       | CakSNP10199    | <i>Kabuli</i>    | <i>Ca_Kabuli_Chr06</i>       | 13669052                       | (G/C)       |
| 10200       | CakSNP10200    | <i>Kabuli</i>    | <i>Ca_Kabuli_Chr06</i>       | 13669049                       | (C/T)       |
| 10201       | CakSNP10201    | <i>Kabuli</i>    | <i>Ca_Kabuli_Chr06</i>       | 13669048                       | (T/A)       |
| 10202       | CakSNP10202    | <i>Kabuli</i>    | <i>Ca_Kabuli_Chr06</i>       | 13669042                       | (A/G)       |
| 10203       | CakSNP10203    | <i>Kabuli</i>    | <i>Ca_Kabuli_Chr06</i>       | 13669018                       | (G/A)       |
| 10204       | CakSNP10204    | <i>Kabuli</i>    | <i>Ca_Kabuli_Chr06</i>       | 13669006                       | (G/C)       |
| 10205       | CakSNP10205    | <i>Kabuli</i>    | <i>Ca_Kabuli_Chr06</i>       | 13714897                       | (A/T)       |
| 10206       | CakSNP10206    | <i>Kabuli</i>    | <i>Ca_Kabuli_Chr06</i>       | 13764980                       | (T/A)       |
| 10207       | CakSNP10207    | <i>Kabuli</i>    | <i>Ca_Kabuli_Chr06</i>       | 13827484                       | (C/T)       |
| 10208       | CakSNP10208    | <i>Kabuli</i>    | <i>Ca_Kabuli_Chr06</i>       | 13827452                       | (C/G)       |
| 10209       | CakSNP10209    | <i>Kabuli</i>    | <i>Ca_Kabuli_Chr06</i>       | 13827444                       | (G/A)       |
| 10210       | CakSNP10210    | <i>Kabuli</i>    | <i>Ca_Kabuli_Chr06</i>       | 13913539                       | (A/G)       |
| 10211       | CakSNP10211    | <i>Kabuli</i>    | <i>Ca_Kabuli_Chr06</i>       | 13917076                       | (T/C)       |
| 10212       | CakSNP10212    | <i>Kabuli</i>    | <i>Ca_Kabuli_Chr06</i>       | 13917135                       | (T/A)       |
| 10213       | CakSNP10213    | <i>Kabuli</i>    | <i>Ca_Kabuli_Chr06</i>       | 13921954                       | (A/T)       |
| 10214       | CakSNP10214    | <i>Kabuli</i>    | <i>Ca_Kabuli_Chr06</i>       | 13941701                       | (A/T)       |
| 10215       | CakSNP10215    | <i>Kabuli</i>    | <i>Ca_Kabuli_Chr06</i>       | 13942961                       | (A/G)       |
| 10216       | CakSNP10216    | <i>Kabuli</i>    | <i>Ca_Kabuli_Chr06</i>       | 13948732                       | (G/T)       |

| <b>S.N.</b> | <b>SNP IDs</b> | <b>Cultivars</b> | <b>Chromosomes/scaffolds</b> | <b>Physical positions (bp)</b> | <b>SNPs</b> |
|-------------|----------------|------------------|------------------------------|--------------------------------|-------------|
| 10217       | CakSNP10217    | <i>Kabuli</i>    | <i>Ca_Kabuli_Chr06</i>       | 13948751                       | (T/G)       |
| 10218       | CakSNP10218    | <i>Kabuli</i>    | <i>Ca_Kabuli_Chr06</i>       | 13948778                       | (A/C)       |
| 10219       | CakSNP10219    | <i>Kabuli</i>    | <i>Ca_Kabuli_Chr06</i>       | 13986559                       | (A/G)       |
| 10220       | CakSNP10220    | <i>Kabuli</i>    | <i>Ca_Kabuli_Chr06</i>       | 14042859                       | (A/T)       |
| 10221       | CakSNP10221    | <i>Kabuli</i>    | <i>Ca_Kabuli_Chr06</i>       | 14067312                       | (A/C)       |
| 10222       | CakSNP10222    | <i>Kabuli</i>    | <i>Ca_Kabuli_Chr06</i>       | 14067326                       | (C/T)       |
| 10223       | CakSNP10223    | <i>Kabuli</i>    | <i>Ca_Kabuli_Chr06</i>       | 14112542                       | (A/G)       |
| 10224       | CakSNP10224    | <i>Kabuli</i>    | <i>Ca_Kabuli_Chr06</i>       | 14148771                       | (A/G)       |
| 10225       | CakSNP10225    | <i>Kabuli</i>    | <i>Ca_Kabuli_Chr06</i>       | 14155543                       | (C/T)       |
| 10226       | CakSNP10226    | <i>Kabuli</i>    | <i>Ca_Kabuli_Chr06</i>       | 14155662                       | (T/C)       |
| 10227       | CakSNP10227    | <i>Kabuli</i>    | <i>Ca_Kabuli_Chr06</i>       | 14155643                       | (A/C)       |
| 10228       | CakSNP10228    | <i>Kabuli</i>    | <i>Ca_Kabuli_Chr06</i>       | 14161084                       | (G/C)       |
| 10229       | CakSNP10229    | <i>Kabuli</i>    | <i>Ca_Kabuli_Chr06</i>       | 14201001                       | (T/C)       |
| 10230       | CakSNP10230    | <i>Kabuli</i>    | <i>Ca_Kabuli_Chr06</i>       | 14200997                       | (G/A)       |
| 10231       | CakSNP10231    | <i>Kabuli</i>    | <i>Ca_Kabuli_Chr06</i>       | 14204400                       | (T/C)       |
| 10232       | CakSNP10232    | <i>Kabuli</i>    | <i>Ca_Kabuli_Chr06</i>       | 14204469                       | (G/A)       |
| 10233       | CakSNP10233    | <i>Kabuli</i>    | <i>Ca_Kabuli_Chr06</i>       | 14254394                       | (A/G)       |
| 10234       | CakSNP10234    | <i>Kabuli</i>    | <i>Ca_Kabuli_Chr06</i>       | 14309042                       | (C/T)       |
| 10235       | CakSNP10235    | <i>Kabuli</i>    | <i>Ca_Kabuli_Chr06</i>       | 14330533                       | (T/C)       |
| 10236       | CakSNP10236    | <i>Kabuli</i>    | <i>Ca_Kabuli_Chr06</i>       | 14332018                       | (A/C)       |
| 10237       | CakSNP10237    | <i>Kabuli</i>    | <i>Ca_Kabuli_Chr06</i>       | 14332404                       | (A/G)       |
| 10238       | CakSNP10238    | <i>Kabuli</i>    | <i>Ca_Kabuli_Chr06</i>       | 14353598                       | (C/T)       |
| 10239       | CakSNP10239    | <i>Kabuli</i>    | <i>Ca_Kabuli_Chr06</i>       | 14353624                       | (G/A)       |
| 10240       | CakSNP10240    | <i>Kabuli</i>    | <i>Ca_Kabuli_Chr06</i>       | 14371493                       | (C/T)       |
| 10241       | CakSNP10241    | <i>Kabuli</i>    | <i>Ca_Kabuli_Chr06</i>       | 14371530                       | (C/T)       |
| 10242       | CakSNP10242    | <i>Kabuli</i>    | <i>Ca_Kabuli_Chr06</i>       | 14375135                       | (G/A)       |
| 10243       | CakSNP10243    | <i>Kabuli</i>    | <i>Ca_Kabuli_Chr06</i>       | 14375141                       | (G/C)       |
| 10244       | CakSNP10244    | <i>Kabuli</i>    | <i>Ca_Kabuli_Chr06</i>       | 14375172                       | (A/G)       |
| 10245       | CakSNP10245    | <i>Kabuli</i>    | <i>Ca_Kabuli_Chr06</i>       | 14375196                       | (G/A)       |
| 10246       | CakSNP10246    | <i>Kabuli</i>    | <i>Ca_Kabuli_Chr06</i>       | 14375207                       | (C/T)       |
| 10247       | CakSNP10247    | <i>Kabuli</i>    | <i>Ca_Kabuli_Chr06</i>       | 14401990                       | (G/A)       |
| 10248       | CakSNP10248    | <i>Kabuli</i>    | <i>Ca_Kabuli_Chr06</i>       | 14416997                       | (A/G)       |
| 10249       | CakSNP10249    | <i>Kabuli</i>    | <i>Ca_Kabuli_Chr06</i>       | 14416981                       | (A/G)       |
| 10250       | CakSNP10250    | <i>Kabuli</i>    | <i>Ca_Kabuli_Chr06</i>       | 14419832                       | (C/T)       |
| 10251       | CakSNP10251    | <i>Kabuli</i>    | <i>Ca_Kabuli_Chr06</i>       | 14526540                       | (A/T)       |
| 10252       | CakSNP10252    | <i>Kabuli</i>    | <i>Ca_Kabuli_Chr06</i>       | 14589478                       | (T/G)       |
| 10253       | CakSNP10253    | <i>Kabuli</i>    | <i>Ca_Kabuli_Chr06</i>       | 14589480                       | (T/C)       |
| 10254       | CakSNP10254    | <i>Kabuli</i>    | <i>Ca_Kabuli_Chr06</i>       | 14589520                       | (G/C)       |
| 10255       | CakSNP10255    | <i>Kabuli</i>    | <i>Ca_Kabuli_Chr06</i>       | 14589744                       | (C/T)       |



| <b>S.N.</b> | <b>SNP IDs</b> | <b>Cultivars</b> | <b>Chromosomes/scaffolds</b> | <b>Physical positions (bp)</b> | <b>SNPs</b> |
|-------------|----------------|------------------|------------------------------|--------------------------------|-------------|
| 10256       | CakSNP10256    | <i>Kabuli</i>    | <i>Ca_Kabuli_Chr06</i>       | 14589807                       | (T/G)       |
| 10257       | CakSNP10257    | <i>Kabuli</i>    | <i>Ca_Kabuli_Chr06</i>       | 14589873                       | (T/C)       |
| 10258       | CakSNP10258    | <i>Kabuli</i>    | <i>Ca_Kabuli_Chr06</i>       | 14606892                       | (A/C)       |
| 10259       | CakSNP10259    | <i>Kabuli</i>    | <i>Ca_Kabuli_Chr06</i>       | 14628213                       | (A/T)       |
| 10260       | CakSNP10260    | <i>Kabuli</i>    | <i>Ca_Kabuli_Chr06</i>       | 14628215                       | (T/C)       |
| 10261       | CakSNP10261    | <i>Kabuli</i>    | <i>Ca_Kabuli_Chr06</i>       | 14628216                       | (A/C)       |
| 10262       | CakSNP10262    | <i>Kabuli</i>    | <i>Ca_Kabuli_Chr06</i>       | 14628284                       | (G/A)       |
| 10263       | CakSNP10263    | <i>Kabuli</i>    | <i>Ca_Kabuli_Chr06</i>       | 14719793                       | (T/C)       |
| 10264       | CakSNP10264    | <i>Kabuli</i>    | <i>Ca_Kabuli_Chr06</i>       | 14719840                       | (G/T)       |
| 10265       | CakSNP10265    | <i>Kabuli</i>    | <i>Ca_Kabuli_Chr06</i>       | 14747608                       | (T/C)       |
| 10266       | CakSNP10266    | <i>Kabuli</i>    | <i>Ca_Kabuli_Chr06</i>       | 14753191                       | (C/T)       |
| 10267       | CakSNP10267    | <i>Kabuli</i>    | <i>Ca_Kabuli_Chr06</i>       | 14753190                       | (G/A)       |
| 10268       | CakSNP10268    | <i>Kabuli</i>    | <i>Ca_Kabuli_Chr06</i>       | 14753158                       | (A/G)       |
| 10269       | CakSNP10269    | <i>Kabuli</i>    | <i>Ca_Kabuli_Chr06</i>       | 14753113                       | (C/A)       |
| 10270       | CakSNP10270    | <i>Kabuli</i>    | <i>Ca_Kabuli_Chr06</i>       | 14753145                       | (C/A)       |
| 10271       | CakSNP10271    | <i>Kabuli</i>    | <i>Ca_Kabuli_Chr06</i>       | 14753150                       | (G/A)       |
| 10272       | CakSNP10272    | <i>Kabuli</i>    | <i>Ca_Kabuli_Chr06</i>       | 14762493                       | (A/G)       |
| 10273       | CakSNP10273    | <i>Kabuli</i>    | <i>Ca_Kabuli_Chr06</i>       | 14771564                       | (G/T)       |
| 10274       | CakSNP10274    | <i>Kabuli</i>    | <i>Ca_Kabuli_Chr06</i>       | 14771709                       | (G/A)       |
| 10275       | CakSNP10275    | <i>Kabuli</i>    | <i>Ca_Kabuli_Chr06</i>       | 14786015                       | (T/G)       |
| 10276       | CakSNP10276    | <i>Kabuli</i>    | <i>Ca_Kabuli_Chr06</i>       | 14789964                       | (A/C)       |
| 10277       | CakSNP10277    | <i>Kabuli</i>    | <i>Ca_Kabuli_Chr06</i>       | 14846794                       | (C/T)       |
| 10278       | CakSNP10278    | <i>Kabuli</i>    | <i>Ca_Kabuli_Chr06</i>       | 14857722                       | (C/A)       |
| 10279       | CakSNP10279    | <i>Kabuli</i>    | <i>Ca_Kabuli_Chr06</i>       | 14857709                       | (A/G)       |
| 10280       | CakSNP10280    | <i>Kabuli</i>    | <i>Ca_Kabuli_Chr06</i>       | 14857680                       | (G/A)       |
| 10281       | CakSNP10281    | <i>Kabuli</i>    | <i>Ca_Kabuli_Chr06</i>       | 14861487                       | (T/A)       |
| 10282       | CakSNP10282    | <i>Kabuli</i>    | <i>Ca_Kabuli_Chr06</i>       | 14884604                       | (T/G)       |
| 10283       | CakSNP10283    | <i>Kabuli</i>    | <i>Ca_Kabuli_Chr06</i>       | 14884606                       | (T/C)       |
| 10284       | CakSNP10284    | <i>Kabuli</i>    | <i>Ca_Kabuli_Chr06</i>       | 14891588                       | (T/C)       |
| 10285       | CakSNP10285    | <i>Kabuli</i>    | <i>Ca_Kabuli_Chr06</i>       | 14891533                       | (T/C)       |
| 10286       | CakSNP10286    | <i>Kabuli</i>    | <i>Ca_Kabuli_Chr06</i>       | 14891597                       | (C/T)       |
| 10287       | CakSNP10287    | <i>Kabuli</i>    | <i>Ca_Kabuli_Chr06</i>       | 14891626                       | (C/A)       |
| 10288       | CakSNP10288    | <i>Kabuli</i>    | <i>Ca_Kabuli_Chr06</i>       | 14941348                       | (C/T)       |
| 10289       | CakSNP10289    | <i>Kabuli</i>    | <i>Ca_Kabuli_Chr06</i>       | 14951877                       | (C/T)       |
| 10290       | CakSNP10290    | <i>Kabuli</i>    | <i>Ca_Kabuli_Chr06</i>       | 14951860                       | (G/A)       |
| 10291       | CakSNP10291    | <i>Kabuli</i>    | <i>Ca_Kabuli_Chr06</i>       | 14982998                       | (T/C)       |
| 10292       | CakSNP10292    | <i>Kabuli</i>    | <i>Ca_Kabuli_Chr06</i>       | 14983391                       | (C/T)       |
| 10293       | CakSNP10293    | <i>Kabuli</i>    | <i>Ca_Kabuli_Chr06</i>       | 15024904                       | (C/A)       |
| 10294       | CakSNP10294    | <i>Kabuli</i>    | <i>Ca_Kabuli_Chr06</i>       | 15024881                       | (C/A)       |

| <b>S.N.</b> | <b>SNP IDs</b> | <b>Cultivars</b> | <b>Chromosomes/scaffolds</b> | <b>Physical positions (bp)</b> | <b>SNPs</b> |
|-------------|----------------|------------------|------------------------------|--------------------------------|-------------|
| 10295       | CakSNP10295    | <i>Kabuli</i>    | <i>Ca_Kabuli_Chr06</i>       | 15024979                       | (T/G)       |
| 10296       | CakSNP10296    | <i>Kabuli</i>    | <i>Ca_Kabuli_Chr06</i>       | 15024999                       | (T/A)       |
| 10297       | CakSNP10297    | <i>Kabuli</i>    | <i>Ca_Kabuli_Chr06</i>       | 15025010                       | (T/C)       |
| 10298       | CakSNP10298    | <i>Kabuli</i>    | <i>Ca_Kabuli_Chr06</i>       | 15025012                       | (A/C)       |
| 10299       | CakSNP10299    | <i>Kabuli</i>    | <i>Ca_Kabuli_Chr06</i>       | 15051094                       | (T/C)       |
| 10300       | CakSNP10300    | <i>Kabuli</i>    | <i>Ca_Kabuli_Chr06</i>       | 15061717                       | (G/A)       |
| 10301       | CakSNP10301    | <i>Kabuli</i>    | <i>Ca_Kabuli_Chr06</i>       | 15123739                       | (C/T)       |
| 10302       | CakSNP10302    | <i>Kabuli</i>    | <i>Ca_Kabuli_Chr06</i>       | 15123771                       | (T/C)       |
| 10303       | CakSNP10303    | <i>Kabuli</i>    | <i>Ca_Kabuli_Chr06</i>       | 15123827                       | (T/G)       |
| 10304       | CakSNP10304    | <i>Kabuli</i>    | <i>Ca_Kabuli_Chr06</i>       | 15123947                       | (G/A)       |
| 10305       | CakSNP10305    | <i>Kabuli</i>    | <i>Ca_Kabuli_Chr06</i>       | 15173607                       | (G/A)       |
| 10306       | CakSNP10306    | <i>Kabuli</i>    | <i>Ca_Kabuli_Chr06</i>       | 15185723                       | (T/C)       |
| 10307       | CakSNP10307    | <i>Kabuli</i>    | <i>Ca_Kabuli_Chr06</i>       | 15204957                       | (G/C)       |
| 10308       | CakSNP10308    | <i>Kabuli</i>    | <i>Ca_Kabuli_Chr06</i>       | 15235575                       | (A/G)       |
| 10309       | CakSNP10309    | <i>Kabuli</i>    | <i>Ca_Kabuli_Chr06</i>       | 15235576                       | (C/T)       |
| 10310       | CakSNP10310    | <i>Kabuli</i>    | <i>Ca_Kabuli_Chr06</i>       | 15235615                       | (C/T)       |
| 10311       | CakSNP10311    | <i>Kabuli</i>    | <i>Ca_Kabuli_Chr06</i>       | 15243538                       | (A/T)       |
| 10312       | CakSNP10312    | <i>Kabuli</i>    | <i>Ca_Kabuli_Chr06</i>       | 15243590                       | (A/G)       |
| 10313       | CakSNP10313    | <i>Kabuli</i>    | <i>Ca_Kabuli_Chr06</i>       | 15243630                       | (C/T)       |
| 10314       | CakSNP10314    | <i>Kabuli</i>    | <i>Ca_Kabuli_Chr06</i>       | 15243674                       | (T/A)       |
| 10315       | CakSNP10315    | <i>Kabuli</i>    | <i>Ca_Kabuli_Chr06</i>       | 15268491                       | (T/G)       |
| 10316       | CakSNP10316    | <i>Kabuli</i>    | <i>Ca_Kabuli_Chr06</i>       | 15294332                       | (T/G)       |
| 10317       | CakSNP10317    | <i>Kabuli</i>    | <i>Ca_Kabuli_Chr06</i>       | 15294331                       | (C/T)       |
| 10318       | CakSNP10318    | <i>Kabuli</i>    | <i>Ca_Kabuli_Chr06</i>       | 15294329                       | (A/C)       |
| 10319       | CakSNP10319    | <i>Kabuli</i>    | <i>Ca_Kabuli_Chr06</i>       | 15301137                       | (C/T)       |
| 10320       | CakSNP10320    | <i>Kabuli</i>    | <i>Ca_Kabuli_Chr06</i>       | 15313655                       | (G/T)       |
| 10321       | CakSNP10321    | <i>Kabuli</i>    | <i>Ca_Kabuli_Chr06</i>       | 15328759                       | (C/A)       |
| 10322       | CakSNP10322    | <i>Kabuli</i>    | <i>Ca_Kabuli_Chr06</i>       | 15328805                       | (A/T)       |
| 10323       | CakSNP10323    | <i>Kabuli</i>    | <i>Ca_Kabuli_Chr06</i>       | 15328948                       | (A/C)       |
| 10324       | CakSNP10324    | <i>Kabuli</i>    | <i>Ca_Kabuli_Chr06</i>       | 15347707                       | (C/T)       |
| 10325       | CakSNP10325    | <i>Kabuli</i>    | <i>Ca_Kabuli_Chr06</i>       | 15393321                       | (A/T)       |
| 10326       | CakSNP10326    | <i>Kabuli</i>    | <i>Ca_Kabuli_Chr06</i>       | 15393349                       | (T/C)       |
| 10327       | CakSNP10327    | <i>Kabuli</i>    | <i>Ca_Kabuli_Chr06</i>       | 15463326                       | (C/G)       |
| 10328       | CakSNP10328    | <i>Kabuli</i>    | <i>Ca_Kabuli_Chr06</i>       | 15475948                       | (A/G)       |
| 10329       | CakSNP10329    | <i>Kabuli</i>    | <i>Ca_Kabuli_Chr06</i>       | 15488265                       | (C/T)       |
| 10330       | CakSNP10330    | <i>Kabuli</i>    | <i>Ca_Kabuli_Chr06</i>       | 15488314                       | (A/T)       |
| 10331       | CakSNP10331    | <i>Kabuli</i>    | <i>Ca_Kabuli_Chr06</i>       | 15488309                       | (G/A)       |
| 10332       | CakSNP10332    | <i>Kabuli</i>    | <i>Ca_Kabuli_Chr06</i>       | 15510433                       | (A/T)       |
| 10333       | CakSNP10333    | <i>Kabuli</i>    | <i>Ca_Kabuli_Chr06</i>       | 15510397                       | (G/A)       |

| <b>S.N.</b> | <b>SNP IDs</b> | <b>Cultivars</b> | <b>Chromosomes/scaffolds</b> | <b>Physical positions (bp)</b> | <b>SNPs</b> |
|-------------|----------------|------------------|------------------------------|--------------------------------|-------------|
| 10334       | CakSNP10334    | <i>Kabuli</i>    | <i>Ca_Kabuli_Chr06</i>       | 15537908                       | (A/C)       |
| 10335       | CakSNP10335    | <i>Kabuli</i>    | <i>Ca_Kabuli_Chr06</i>       | 15543295                       | (C/G)       |
| 10336       | CakSNP10336    | <i>Kabuli</i>    | <i>Ca_Kabuli_Chr06</i>       | 15543293                       | (T/G)       |
| 10337       | CakSNP10337    | <i>Kabuli</i>    | <i>Ca_Kabuli_Chr06</i>       | 15543286                       | (G/A)       |
| 10338       | CakSNP10338    | <i>Kabuli</i>    | <i>Ca_Kabuli_Chr06</i>       | 15550044                       | (C/T)       |
| 10339       | CakSNP10339    | <i>Kabuli</i>    | <i>Ca_Kabuli_Chr06</i>       | 15589539                       | (A/T)       |
| 10340       | CakSNP10340    | <i>Kabuli</i>    | <i>Ca_Kabuli_Chr06</i>       | 15589885                       | (G/T)       |
| 10341       | CakSNP10341    | <i>Kabuli</i>    | <i>Ca_Kabuli_Chr06</i>       | 15635126                       | (A/T)       |
| 10342       | CakSNP10342    | <i>Kabuli</i>    | <i>Ca_Kabuli_Chr06</i>       | 15644412                       | (A/T)       |
| 10343       | CakSNP10343    | <i>Kabuli</i>    | <i>Ca_Kabuli_Chr06</i>       | 15644796                       | (A/T)       |
| 10344       | CakSNP10344    | <i>Kabuli</i>    | <i>Ca_Kabuli_Chr06</i>       | 15857728                       | (T/C)       |
| 10345       | CakSNP10345    | <i>Kabuli</i>    | <i>Ca_Kabuli_Chr06</i>       | 15861278                       | (G/A)       |
| 10346       | CakSNP10346    | <i>Kabuli</i>    | <i>Ca_Kabuli_Chr06</i>       | 16113523                       | (T/C)       |
| 10347       | CakSNP10347    | <i>Kabuli</i>    | <i>Ca_Kabuli_Chr06</i>       | 16113522                       | (A/T)       |
| 10348       | CakSNP10348    | <i>Kabuli</i>    | <i>Ca_Kabuli_Chr06</i>       | 16113521                       | (G/T)       |
| 10349       | CakSNP10349    | <i>Kabuli</i>    | <i>Ca_Kabuli_Chr06</i>       | 16115933                       | (T/C)       |
| 10350       | CakSNP10350    | <i>Kabuli</i>    | <i>Ca_Kabuli_Chr06</i>       | 16147469                       | (A/G)       |
| 10351       | CakSNP10351    | <i>Kabuli</i>    | <i>Ca_Kabuli_Chr06</i>       | 16148277                       | (A/C)       |
| 10352       | CakSNP10352    | <i>Kabuli</i>    | <i>Ca_Kabuli_Chr06</i>       | 16189692                       | (C/A)       |
| 10353       | CakSNP10353    | <i>Kabuli</i>    | <i>Ca_Kabuli_Chr06</i>       | 16189693                       | (G/T)       |
| 10354       | CakSNP10354    | <i>Kabuli</i>    | <i>Ca_Kabuli_Chr06</i>       | 16195748                       | (T/C)       |
| 10355       | CakSNP10355    | <i>Kabuli</i>    | <i>Ca_Kabuli_Chr06</i>       | 16196582                       | (G/C)       |
| 10356       | CakSNP10356    | <i>Kabuli</i>    | <i>Ca_Kabuli_Chr06</i>       | 16315552                       | (T/A)       |
| 10357       | CakSNP10357    | <i>Kabuli</i>    | <i>Ca_Kabuli_Chr06</i>       | 16332377                       | (G/A)       |
| 10358       | CakSNP10358    | <i>Kabuli</i>    | <i>Ca_Kabuli_Chr06</i>       | 16353698                       | (G/A)       |
| 10359       | CakSNP10359    | <i>Kabuli</i>    | <i>Ca_Kabuli_Chr06</i>       | 16450107                       | (C/T)       |
| 10360       | CakSNP10360    | <i>Kabuli</i>    | <i>Ca_Kabuli_Chr06</i>       | 16460495                       | (A/C)       |
| 10361       | CakSNP10361    | <i>Kabuli</i>    | <i>Ca_Kabuli_Chr06</i>       | 16561334                       | (C/T)       |
| 10362       | CakSNP10362    | <i>Kabuli</i>    | <i>Ca_Kabuli_Chr06</i>       | 16635061                       | (C/T)       |
| 10363       | CakSNP10363    | <i>Kabuli</i>    | <i>Ca_Kabuli_Chr06</i>       | 16646769                       | (A/T)       |
| 10364       | CakSNP10364    | <i>Kabuli</i>    | <i>Ca_Kabuli_Chr06</i>       | 16646713                       | (T/G)       |
| 10365       | CakSNP10365    | <i>Kabuli</i>    | <i>Ca_Kabuli_Chr06</i>       | 16665385                       | (G/C)       |
| 10366       | CakSNP10366    | <i>Kabuli</i>    | <i>Ca_Kabuli_Chr06</i>       | 16665477                       | (T/C)       |
| 10367       | CakSNP10367    | <i>Kabuli</i>    | <i>Ca_Kabuli_Chr06</i>       | 16665829                       | (G/C)       |
| 10368       | CakSNP10368    | <i>Kabuli</i>    | <i>Ca_Kabuli_Chr06</i>       | 16677320                       | (C/A)       |
| 10369       | CakSNP10369    | <i>Kabuli</i>    | <i>Ca_Kabuli_Chr06</i>       | 16717984                       | (G/A)       |
| 10370       | CakSNP10370    | <i>Kabuli</i>    | <i>Ca_Kabuli_Chr06</i>       | 16718201                       | (G/A)       |
| 10371       | CakSNP10371    | <i>Kabuli</i>    | <i>Ca_Kabuli_Chr06</i>       | 16719918                       | (C/A)       |
| 10372       | CakSNP10372    | <i>Kabuli</i>    | <i>Ca_Kabuli_Chr06</i>       | 16719919                       | (T/G)       |

| <b>S.N.</b> | <b>SNP IDs</b> | <b>Cultivars</b> | <b>Chromosomes/scaffolds</b> | <b>Physical positions (bp)</b> | <b>SNPs</b> |
|-------------|----------------|------------------|------------------------------|--------------------------------|-------------|
| 10373       | CakSNP10373    | <i>Kabuli</i>    | <i>Ca_Kabuli_Chr06</i>       | 16741672                       | (C/T)       |
| 10374       | CakSNP10374    | <i>Kabuli</i>    | <i>Ca_Kabuli_Chr06</i>       | 16748675                       | (A/C)       |
| 10375       | CakSNP10375    | <i>Kabuli</i>    | <i>Ca_Kabuli_Chr06</i>       | 16768782                       | (G/A)       |
| 10376       | CakSNP10376    | <i>Kabuli</i>    | <i>Ca_Kabuli_Chr06</i>       | 16823954                       | (A/G)       |
| 10377       | CakSNP10377    | <i>Kabuli</i>    | <i>Ca_Kabuli_Chr06</i>       | 16932014                       | (C/G)       |
| 10378       | CakSNP10378    | <i>Kabuli</i>    | <i>Ca_Kabuli_Chr06</i>       | 17048493                       | (A/C)       |
| 10379       | CakSNP10379    | <i>Kabuli</i>    | <i>Ca_Kabuli_Chr06</i>       | 17096214                       | (C/T)       |
| 10380       | CakSNP10380    | <i>Kabuli</i>    | <i>Ca_Kabuli_Chr06</i>       | 17096215                       | (G/A)       |
| 10381       | CakSNP10381    | <i>Kabuli</i>    | <i>Ca_Kabuli_Chr06</i>       | 17096224                       | (C/T)       |
| 10382       | CakSNP10382    | <i>Kabuli</i>    | <i>Ca_Kabuli_Chr06</i>       | 17129574                       | (A/G)       |
| 10383       | CakSNP10383    | <i>Kabuli</i>    | <i>Ca_Kabuli_Chr06</i>       | 17148605                       | (G/A)       |
| 10384       | CakSNP10384    | <i>Kabuli</i>    | <i>Ca_Kabuli_Chr06</i>       | 17148773                       | (A/G)       |
| 10385       | CakSNP10385    | <i>Kabuli</i>    | <i>Ca_Kabuli_Chr06</i>       | 17175334                       | (C/A)       |
| 10386       | CakSNP10386    | <i>Kabuli</i>    | <i>Ca_Kabuli_Chr06</i>       | 17175446                       | (G/A)       |
| 10387       | CakSNP10387    | <i>Kabuli</i>    | <i>Ca_Kabuli_Chr06</i>       | 17258827                       | (C/A)       |
| 10388       | CakSNP10388    | <i>Kabuli</i>    | <i>Ca_Kabuli_Chr06</i>       | 17258886                       | (T/G)       |
| 10389       | CakSNP10389    | <i>Kabuli</i>    | <i>Ca_Kabuli_Chr06</i>       | 17262283                       | (C/T)       |
| 10390       | CakSNP10390    | <i>Kabuli</i>    | <i>Ca_Kabuli_Chr06</i>       | 17263126                       | (G/A)       |
| 10391       | CakSNP10391    | <i>Kabuli</i>    | <i>Ca_Kabuli_Chr06</i>       | 17369613                       | (A/G)       |
| 10392       | CakSNP10392    | <i>Kabuli</i>    | <i>Ca_Kabuli_Chr06</i>       | 17445945                       | (T/G)       |
| 10393       | CakSNP10393    | <i>Kabuli</i>    | <i>Ca_Kabuli_Chr06</i>       | 17477741                       | (A/G)       |
| 10394       | CakSNP10394    | <i>Kabuli</i>    | <i>Ca_Kabuli_Chr06</i>       | 17478220                       | (G/A)       |
| 10395       | CakSNP10395    | <i>Kabuli</i>    | <i>Ca_Kabuli_Chr06</i>       | 17480486                       | (G/C)       |
| 10396       | CakSNP10396    | <i>Kabuli</i>    | <i>Ca_Kabuli_Chr06</i>       | 17481288                       | (T/C)       |
| 10397       | CakSNP10397    | <i>Kabuli</i>    | <i>Ca_Kabuli_Chr06</i>       | 17481307                       | (C/A)       |
| 10398       | CakSNP10398    | <i>Kabuli</i>    | <i>Ca_Kabuli_Chr06</i>       | 17481403                       | (T/G)       |
| 10399       | CakSNP10399    | <i>Kabuli</i>    | <i>Ca_Kabuli_Chr06</i>       | 17481392                       | (A/G)       |
| 10400       | CakSNP10400    | <i>Kabuli</i>    | <i>Ca_Kabuli_Chr06</i>       | 17482626                       | (A/G)       |
| 10401       | CakSNP10401    | <i>Kabuli</i>    | <i>Ca_Kabuli_Chr06</i>       | 17482640                       | (C/T)       |
| 10402       | CakSNP10402    | <i>Kabuli</i>    | <i>Ca_Kabuli_Chr06</i>       | 17482649                       | (A/G)       |
| 10403       | CakSNP10403    | <i>Kabuli</i>    | <i>Ca_Kabuli_Chr06</i>       | 17482718                       | (G/A)       |
| 10404       | CakSNP10404    | <i>Kabuli</i>    | <i>Ca_Kabuli_Chr06</i>       | 17482697                       | (A/G)       |
| 10405       | CakSNP10405    | <i>Kabuli</i>    | <i>Ca_Kabuli_Chr06</i>       | 17573309                       | (A/G)       |
| 10406       | CakSNP10406    | <i>Kabuli</i>    | <i>Ca_Kabuli_Chr06</i>       | 17659067                       | (A/C)       |
| 10407       | CakSNP10407    | <i>Kabuli</i>    | <i>Ca_Kabuli_Chr06</i>       | 17741078                       | (G/A)       |
| 10408       | CakSNP10408    | <i>Kabuli</i>    | <i>Ca_Kabuli_Chr06</i>       | 18027391                       | (G/A)       |
| 10409       | CakSNP10409    | <i>Kabuli</i>    | <i>Ca_Kabuli_Chr06</i>       | 18094691                       | (C/A)       |
| 10410       | CakSNP10410    | <i>Kabuli</i>    | <i>Ca_Kabuli_Chr06</i>       | 18125613                       | (C/A)       |
| 10411       | CakSNP10411    | <i>Kabuli</i>    | <i>Ca_Kabuli_Chr06</i>       | 18232696                       | (G/A)       |

| <b>S.N.</b> | <b>SNP IDs</b> | <b>Cultivars</b> | <b>Chromosomes/scaffolds</b> | <b>Physical positions (bp)</b> | <b>SNPs</b> |
|-------------|----------------|------------------|------------------------------|--------------------------------|-------------|
| 10412       | CakSNP10412    | <i>Kabuli</i>    | <i>Ca_Kabuli_Chr06</i>       | 18268960                       | (G/A)       |
| 10413       | CakSNP10413    | <i>Kabuli</i>    | <i>Ca_Kabuli_Chr06</i>       | 18268982                       | (A/G)       |
| 10414       | CakSNP10414    | <i>Kabuli</i>    | <i>Ca_Kabuli_Chr06</i>       | 18389704                       | (T/G)       |
| 10415       | CakSNP10415    | <i>Kabuli</i>    | <i>Ca_Kabuli_Chr06</i>       | 18389661                       | (A/C)       |
| 10416       | CakSNP10416    | <i>Kabuli</i>    | <i>Ca_Kabuli_Chr06</i>       | 18444725                       | (T/C)       |
| 10417       | CakSNP10417    | <i>Kabuli</i>    | <i>Ca_Kabuli_Chr06</i>       | 18549073                       | (T/C)       |
| 10418       | CakSNP10418    | <i>Kabuli</i>    | <i>Ca_Kabuli_Chr06</i>       | 18562366                       | (C/A)       |
| 10419       | CakSNP10419    | <i>Kabuli</i>    | <i>Ca_Kabuli_Chr06</i>       | 18664114                       | (A/T)       |
| 10420       | CakSNP10420    | <i>Kabuli</i>    | <i>Ca_Kabuli_Chr06</i>       | 18747207                       | (G/A)       |
| 10421       | CakSNP10421    | <i>Kabuli</i>    | <i>Ca_Kabuli_Chr06</i>       | 18752554                       | (G/T)       |
| 10422       | CakSNP10422    | <i>Kabuli</i>    | <i>Ca_Kabuli_Chr06</i>       | 18767357                       | (G/A)       |
| 10423       | CakSNP10423    | <i>Kabuli</i>    | <i>Ca_Kabuli_Chr06</i>       | 18771093                       | (T/A)       |
| 10424       | CakSNP10424    | <i>Kabuli</i>    | <i>Ca_Kabuli_Chr06</i>       | 18798747                       | (A/C)       |
| 10425       | CakSNP10425    | <i>Kabuli</i>    | <i>Ca_Kabuli_Chr06</i>       | 18852806                       | (T/C)       |
| 10426       | CakSNP10426    | <i>Kabuli</i>    | <i>Ca_Kabuli_Chr06</i>       | 18852854                       | (T/C)       |
| 10427       | CakSNP10427    | <i>Kabuli</i>    | <i>Ca_Kabuli_Chr06</i>       | 18876221                       | (T/C)       |
| 10428       | CakSNP10428    | <i>Kabuli</i>    | <i>Ca_Kabuli_Chr06</i>       | 18876213                       | (A/G)       |
| 10429       | CakSNP10429    | <i>Kabuli</i>    | <i>Ca_Kabuli_Chr06</i>       | 18899989                       | (C/A)       |
| 10430       | CakSNP10430    | <i>Kabuli</i>    | <i>Ca_Kabuli_Chr06</i>       | 18900031                       | (C/T)       |
| 10431       | CakSNP10431    | <i>Kabuli</i>    | <i>Ca_Kabuli_Chr06</i>       | 18900034                       | (G/A)       |
| 10432       | CakSNP10432    | <i>Kabuli</i>    | <i>Ca_Kabuli_Chr06</i>       | 18916626                       | (G/T)       |
| 10433       | CakSNP10433    | <i>Kabuli</i>    | <i>Ca_Kabuli_Chr06</i>       | 18916619                       | (C/T)       |
| 10434       | CakSNP10434    | <i>Kabuli</i>    | <i>Ca_Kabuli_Chr06</i>       | 18925002                       | (A/G)       |
| 10435       | CakSNP10435    | <i>Kabuli</i>    | <i>Ca_Kabuli_Chr06</i>       | 18938479                       | (C/T)       |
| 10436       | CakSNP10436    | <i>Kabuli</i>    | <i>Ca_Kabuli_Chr06</i>       | 18938512                       | (G/A)       |
| 10437       | CakSNP10437    | <i>Kabuli</i>    | <i>Ca_Kabuli_Chr06</i>       | 18956194                       | (G/A)       |
| 10438       | CakSNP10438    | <i>Kabuli</i>    | <i>Ca_Kabuli_Chr06</i>       | 18987220                       | (T/G)       |
| 10439       | CakSNP10439    | <i>Kabuli</i>    | <i>Ca_Kabuli_Chr06</i>       | 18999175                       | (C/T)       |
| 10440       | CakSNP10440    | <i>Kabuli</i>    | <i>Ca_Kabuli_Chr06</i>       | 19033068                       | (A/C)       |
| 10441       | CakSNP10441    | <i>Kabuli</i>    | <i>Ca_Kabuli_Chr06</i>       | 19033309                       | (G/A)       |
| 10442       | CakSNP10442    | <i>Kabuli</i>    | <i>Ca_Kabuli_Chr06</i>       | 19034129                       | (A/G)       |
| 10443       | CakSNP10443    | <i>Kabuli</i>    | <i>Ca_Kabuli_Chr06</i>       | 19125254                       | (G/A)       |
| 10444       | CakSNP10444    | <i>Kabuli</i>    | <i>Ca_Kabuli_Chr06</i>       | 19125222                       | (T/C)       |
| 10445       | CakSNP10445    | <i>Kabuli</i>    | <i>Ca_Kabuli_Chr06</i>       | 19129651                       | (T/C)       |
| 10446       | CakSNP10446    | <i>Kabuli</i>    | <i>Ca_Kabuli_Chr06</i>       | 19169687                       | (T/C)       |
| 10447       | CakSNP10447    | <i>Kabuli</i>    | <i>Ca_Kabuli_Chr06</i>       | 19195656                       | (A/T)       |
| 10448       | CakSNP10448    | <i>Kabuli</i>    | <i>Ca_Kabuli_Chr06</i>       | 19195659                       | (A/C)       |
| 10449       | CakSNP10449    | <i>Kabuli</i>    | <i>Ca_Kabuli_Chr06</i>       | 19198386                       | (G/A)       |
| 10450       | CakSNP10450    | <i>Kabuli</i>    | <i>Ca_Kabuli_Chr06</i>       | 19217820                       | (G/A)       |

| <b>S.N.</b> | <b>SNP IDs</b> | <b>Cultivars</b> | <b>Chromosomes/scaffolds</b> | <b>Physical positions (bp)</b> | <b>SNPs</b> |
|-------------|----------------|------------------|------------------------------|--------------------------------|-------------|
| 10451       | CakSNP10451    | <i>Kabuli</i>    | <i>Ca_Kabuli_Chr06</i>       | 19304834                       | (A/G)       |
| 10452       | CakSNP10452    | <i>Kabuli</i>    | <i>Ca_Kabuli_Chr06</i>       | 19440988                       | (T/C)       |
| 10453       | CakSNP10453    | <i>Kabuli</i>    | <i>Ca_Kabuli_Chr06</i>       | 19441372                       | (T/C)       |
| 10454       | CakSNP10454    | <i>Kabuli</i>    | <i>Ca_Kabuli_Chr06</i>       | 19450845                       | (T/A)       |
| 10455       | CakSNP10455    | <i>Kabuli</i>    | <i>Ca_Kabuli_Chr06</i>       | 19458843                       | (C/T)       |
| 10456       | CakSNP10456    | <i>Kabuli</i>    | <i>Ca_Kabuli_Chr06</i>       | 19458898                       | (T/A)       |
| 10457       | CakSNP10457    | <i>Kabuli</i>    | <i>Ca_Kabuli_Chr06</i>       | 19458908                       | (A/T)       |
| 10458       | CakSNP10458    | <i>Kabuli</i>    | <i>Ca_Kabuli_Chr06</i>       | 19476915                       | (T/C)       |
| 10459       | CakSNP10459    | <i>Kabuli</i>    | <i>Ca_Kabuli_Chr06</i>       | 19476916                       | (A/G)       |
| 10460       | CakSNP10460    | <i>Kabuli</i>    | <i>Ca_Kabuli_Chr06</i>       | 19477006                       | (T/C)       |
| 10461       | CakSNP10461    | <i>Kabuli</i>    | <i>Ca_Kabuli_Chr06</i>       | 19478493                       | (T/A)       |
| 10462       | CakSNP10462    | <i>Kabuli</i>    | <i>Ca_Kabuli_Chr06</i>       | 19494588                       | (G/T)       |
| 10463       | CakSNP10463    | <i>Kabuli</i>    | <i>Ca_Kabuli_Chr06</i>       | 19494584                       | (C/A)       |
| 10464       | CakSNP10464    | <i>Kabuli</i>    | <i>Ca_Kabuli_Chr06</i>       | 19551459                       | (G/A)       |
| 10465       | CakSNP10465    | <i>Kabuli</i>    | <i>Ca_Kabuli_Chr06</i>       | 19551504                       | (G/C)       |
| 10466       | CakSNP10466    | <i>Kabuli</i>    | <i>Ca_Kabuli_Chr06</i>       | 19556904                       | (G/A)       |
| 10467       | CakSNP10467    | <i>Kabuli</i>    | <i>Ca_Kabuli_Chr06</i>       | 19557045                       | (C/T)       |
| 10468       | CakSNP10468    | <i>Kabuli</i>    | <i>Ca_Kabuli_Chr06</i>       | 19578972                       | (T/C)       |
| 10469       | CakSNP10469    | <i>Kabuli</i>    | <i>Ca_Kabuli_Chr06</i>       | 19725007                       | (T/A)       |
| 10470       | CakSNP10470    | <i>Kabuli</i>    | <i>Ca_Kabuli_Chr06</i>       | 20505641                       | (A/T)       |
| 10471       | CakSNP10471    | <i>Kabuli</i>    | <i>Ca_Kabuli_Chr06</i>       | 20558142                       | (C/T)       |
| 10472       | CakSNP10472    | <i>Kabuli</i>    | <i>Ca_Kabuli_Chr06</i>       | 20558138                       | (G/A)       |
| 10473       | CakSNP10473    | <i>Kabuli</i>    | <i>Ca_Kabuli_Chr06</i>       | 20660779                       | (T/C)       |
| 10474       | CakSNP10474    | <i>Kabuli</i>    | <i>Ca_Kabuli_Chr06</i>       | 20660782                       | (T/C)       |
| 10475       | CakSNP10475    | <i>Kabuli</i>    | <i>Ca_Kabuli_Chr06</i>       | 20660819                       | (T/C)       |
| 10476       | CakSNP10476    | <i>Kabuli</i>    | <i>Ca_Kabuli_Chr06</i>       | 20660820                       | (T/A)       |
| 10477       | CakSNP10477    | <i>Kabuli</i>    | <i>Ca_Kabuli_Chr06</i>       | 20660841                       | (A/G)       |
| 10478       | CakSNP10478    | <i>Kabuli</i>    | <i>Ca_Kabuli_Chr06</i>       | 20660870                       | (G/C)       |
| 10479       | CakSNP10479    | <i>Kabuli</i>    | <i>Ca_Kabuli_Chr06</i>       | 20671043                       | (T/C)       |
| 10480       | CakSNP10480    | <i>Kabuli</i>    | <i>Ca_Kabuli_Chr06</i>       | 20739258                       | (A/T)       |
| 10481       | CakSNP10481    | <i>Kabuli</i>    | <i>Ca_Kabuli_Chr06</i>       | 20739340                       | (A/G)       |
| 10482       | CakSNP10482    | <i>Kabuli</i>    | <i>Ca_Kabuli_Chr06</i>       | 20766342                       | (T/A)       |
| 10483       | CakSNP10483    | <i>Kabuli</i>    | <i>Ca_Kabuli_Chr06</i>       | 20766377                       | (C/A)       |
| 10484       | CakSNP10484    | <i>Kabuli</i>    | <i>Ca_Kabuli_Chr06</i>       | 20766397                       | (G/T)       |
| 10485       | CakSNP10485    | <i>Kabuli</i>    | <i>Ca_Kabuli_Chr06</i>       | 20770728                       | (C/T)       |
| 10486       | CakSNP10486    | <i>Kabuli</i>    | <i>Ca_Kabuli_Chr06</i>       | 20776473                       | (A/G)       |
| 10487       | CakSNP10487    | <i>Kabuli</i>    | <i>Ca_Kabuli_Chr06</i>       | 20786079                       | (T/A)       |
| 10488       | CakSNP10488    | <i>Kabuli</i>    | <i>Ca_Kabuli_Chr06</i>       | 20802747                       | (G/C)       |
| 10489       | CakSNP10489    | <i>Kabuli</i>    | <i>Ca_Kabuli_Chr06</i>       | 20830353                       | (T/G)       |

| <b>S.N.</b> | <b>SNP IDs</b> | <b>Cultivars</b> | <b>Chromosomes/scaffolds</b> | <b>Physical positions (bp)</b> | <b>SNPs</b> |
|-------------|----------------|------------------|------------------------------|--------------------------------|-------------|
| 10490       | CakSNP10490    | <i>Kabuli</i>    | <i>Ca_Kabuli_Chr06</i>       | 20830634                       | (T/A)       |
| 10491       | CakSNP10491    | <i>Kabuli</i>    | <i>Ca_Kabuli_Chr06</i>       | 20890714                       | (A/G)       |
| 10492       | CakSNP10492    | <i>Kabuli</i>    | <i>Ca_Kabuli_Chr06</i>       | 20917713                       | (A/C)       |
| 10493       | CakSNP10493    | <i>Kabuli</i>    | <i>Ca_Kabuli_Chr06</i>       | 20917694                       | (A/T)       |
| 10494       | CakSNP10494    | <i>Kabuli</i>    | <i>Ca_Kabuli_Chr06</i>       | 21025495                       | (T/A)       |
| 10495       | CakSNP10495    | <i>Kabuli</i>    | <i>Ca_Kabuli_Chr06</i>       | 21025494                       | (C/T)       |
| 10496       | CakSNP10496    | <i>Kabuli</i>    | <i>Ca_Kabuli_Chr06</i>       | 21025540                       | (C/T)       |
| 10497       | CakSNP10497    | <i>Kabuli</i>    | <i>Ca_Kabuli_Chr06</i>       | 21025677                       | (T/A)       |
| 10498       | CakSNP10498    | <i>Kabuli</i>    | <i>Ca_Kabuli_Chr06</i>       | 21025742                       | (T/G)       |
| 10499       | CakSNP10499    | <i>Kabuli</i>    | <i>Ca_Kabuli_Chr06</i>       | 21025706                       | (C/T)       |
| 10500       | CakSNP10500    | <i>Kabuli</i>    | <i>Ca_Kabuli_Chr06</i>       | 21025673                       | (C/T)       |
| 10501       | CakSNP10501    | <i>Kabuli</i>    | <i>Ca_Kabuli_Chr06</i>       | 21025680                       | (C/T)       |
| 10502       | CakSNP10502    | <i>Kabuli</i>    | <i>Ca_Kabuli_Chr06</i>       | 21025682                       | (C/T)       |
| 10503       | CakSNP10503    | <i>Kabuli</i>    | <i>Ca_Kabuli_Chr06</i>       | 21025712                       | (C/T)       |
| 10504       | CakSNP10504    | <i>Kabuli</i>    | <i>Ca_Kabuli_Chr06</i>       | 21025718                       | (C/A)       |
| 10505       | CakSNP10505    | <i>Kabuli</i>    | <i>Ca_Kabuli_Chr06</i>       | 21025894                       | (G/T)       |
| 10506       | CakSNP10506    | <i>Kabuli</i>    | <i>Ca_Kabuli_Chr06</i>       | 21054758                       | (T/C)       |
| 10507       | CakSNP10507    | <i>Kabuli</i>    | <i>Ca_Kabuli_Chr06</i>       | 21058286                       | (G/T)       |
| 10508       | CakSNP10508    | <i>Kabuli</i>    | <i>Ca_Kabuli_Chr06</i>       | 21135764                       | (C/T)       |
| 10509       | CakSNP10509    | <i>Kabuli</i>    | <i>Ca_Kabuli_Chr06</i>       | 21135996                       | (C/T)       |
| 10510       | CakSNP10510    | <i>Kabuli</i>    | <i>Ca_Kabuli_Chr06</i>       | 21139038                       | (C/G)       |
| 10511       | CakSNP10511    | <i>Kabuli</i>    | <i>Ca_Kabuli_Chr06</i>       | 21165963                       | (A/C)       |
| 10512       | CakSNP10512    | <i>Kabuli</i>    | <i>Ca_Kabuli_Chr06</i>       | 21165999                       | (G/T)       |
| 10513       | CakSNP10513    | <i>Kabuli</i>    | <i>Ca_Kabuli_Chr06</i>       | 21170382                       | (G/A)       |
| 10514       | CakSNP10514    | <i>Kabuli</i>    | <i>Ca_Kabuli_Chr06</i>       | 21170401                       | (C/A)       |
| 10515       | CakSNP10515    | <i>Kabuli</i>    | <i>Ca_Kabuli_Chr06</i>       | 21177330                       | (C/A)       |
| 10516       | CakSNP10516    | <i>Kabuli</i>    | <i>Ca_Kabuli_Chr06</i>       | 21238178                       | (A/G)       |
| 10517       | CakSNP10517    | <i>Kabuli</i>    | <i>Ca_Kabuli_Chr06</i>       | 21238711                       | (C/T)       |
| 10518       | CakSNP10518    | <i>Kabuli</i>    | <i>Ca_Kabuli_Chr06</i>       | 21238707                       | (G/T)       |
| 10519       | CakSNP10519    | <i>Kabuli</i>    | <i>Ca_Kabuli_Chr06</i>       | 21276479                       | (G/T)       |
| 10520       | CakSNP10520    | <i>Kabuli</i>    | <i>Ca_Kabuli_Chr06</i>       | 21276551                       | (C/G)       |
| 10521       | CakSNP10521    | <i>Kabuli</i>    | <i>Ca_Kabuli_Chr06</i>       | 21323438                       | (T/C)       |
| 10522       | CakSNP10522    | <i>Kabuli</i>    | <i>Ca_Kabuli_Chr06</i>       | 21323390                       | (C/G)       |
| 10523       | CakSNP10523    | <i>Kabuli</i>    | <i>Ca_Kabuli_Chr06</i>       | 21367869                       | (A/G)       |
| 10524       | CakSNP10524    | <i>Kabuli</i>    | <i>Ca_Kabuli_Chr06</i>       | 21367830                       | (T/A)       |
| 10525       | CakSNP10525    | <i>Kabuli</i>    | <i>Ca_Kabuli_Chr06</i>       | 21368163                       | (C/T)       |
| 10526       | CakSNP10526    | <i>Kabuli</i>    | <i>Ca_Kabuli_Chr06</i>       | 21385915                       | (C/A)       |
| 10527       | CakSNP10527    | <i>Kabuli</i>    | <i>Ca_Kabuli_Chr06</i>       | 21478820                       | (G/T)       |
| 10528       | CakSNP10528    | <i>Kabuli</i>    | <i>Ca_Kabuli_Chr06</i>       | 21478816                       | (C/T)       |

| <b>S.N.</b> | <b>SNP IDs</b> | <b>Cultivars</b> | <b>Chromosomes/scaffolds</b> | <b>Physical positions (bp)</b> | <b>SNPs</b> |
|-------------|----------------|------------------|------------------------------|--------------------------------|-------------|
| 10529       | CakSNP10529    | <i>Kabuli</i>    | <i>Ca_Kabuli_Chr06</i>       | 21483425                       | (T/G)       |
| 10530       | CakSNP10530    | <i>Kabuli</i>    | <i>Ca_Kabuli_Chr06</i>       | 21483429                       | (C/T)       |
| 10531       | CakSNP10531    | <i>Kabuli</i>    | <i>Ca_Kabuli_Chr06</i>       | 21483494                       | (T/G)       |
| 10532       | CakSNP10532    | <i>Kabuli</i>    | <i>Ca_Kabuli_Chr06</i>       | 21489498                       | (A/G)       |
| 10533       | CakSNP10533    | <i>Kabuli</i>    | <i>Ca_Kabuli_Chr06</i>       | 21506224                       | (A/C)       |
| 10534       | CakSNP10534    | <i>Kabuli</i>    | <i>Ca_Kabuli_Chr06</i>       | 21540338                       | (A/G)       |
| 10535       | CakSNP10535    | <i>Kabuli</i>    | <i>Ca_Kabuli_Chr06</i>       | 21540382                       | (T/G)       |
| 10536       | CakSNP10536    | <i>Kabuli</i>    | <i>Ca_Kabuli_Chr06</i>       | 21576745                       | (G/A)       |
| 10537       | CakSNP10537    | <i>Kabuli</i>    | <i>Ca_Kabuli_Chr06</i>       | 21602874                       | (C/T)       |
| 10538       | CakSNP10538    | <i>Kabuli</i>    | <i>Ca_Kabuli_Chr06</i>       | 21603102                       | (G/C)       |
| 10539       | CakSNP10539    | <i>Kabuli</i>    | <i>Ca_Kabuli_Chr06</i>       | 21675734                       | (T/G)       |
| 10540       | CakSNP10540    | <i>Kabuli</i>    | <i>Ca_Kabuli_Chr06</i>       | 21675757                       | (A/G)       |
| 10541       | CakSNP10541    | <i>Kabuli</i>    | <i>Ca_Kabuli_Chr06</i>       | 21675762                       | (G/T)       |
| 10542       | CakSNP10542    | <i>Kabuli</i>    | <i>Ca_Kabuli_Chr06</i>       | 21675816                       | (C/G)       |
| 10543       | CakSNP10543    | <i>Kabuli</i>    | <i>Ca_Kabuli_Chr06</i>       | 21718674                       | (G/T)       |
| 10544       | CakSNP10544    | <i>Kabuli</i>    | <i>Ca_Kabuli_Chr06</i>       | 21756666                       | (A/T)       |
| 10545       | CakSNP10545    | <i>Kabuli</i>    | <i>Ca_Kabuli_Chr06</i>       | 21756706                       | (C/T)       |
| 10546       | CakSNP10546    | <i>Kabuli</i>    | <i>Ca_Kabuli_Chr06</i>       | 21763468                       | (G/A)       |
| 10547       | CakSNP10547    | <i>Kabuli</i>    | <i>Ca_Kabuli_Chr06</i>       | 21763611                       | (C/T)       |
| 10548       | CakSNP10548    | <i>Kabuli</i>    | <i>Ca_Kabuli_Chr06</i>       | 21763582                       | (C/T)       |
| 10549       | CakSNP10549    | <i>Kabuli</i>    | <i>Ca_Kabuli_Chr06</i>       | 21804333                       | (T/A)       |
| 10550       | CakSNP10550    | <i>Kabuli</i>    | <i>Ca_Kabuli_Chr06</i>       | 21804337                       | (G/C)       |
| 10551       | CakSNP10551    | <i>Kabuli</i>    | <i>Ca_Kabuli_Chr06</i>       | 21834111                       | (C/G)       |
| 10552       | CakSNP10552    | <i>Kabuli</i>    | <i>Ca_Kabuli_Chr06</i>       | 21861700                       | (T/A)       |
| 10553       | CakSNP10553    | <i>Kabuli</i>    | <i>Ca_Kabuli_Chr06</i>       | 21914387                       | (T/C)       |
| 10554       | CakSNP10554    | <i>Kabuli</i>    | <i>Ca_Kabuli_Chr06</i>       | 21914380                       | (C/T)       |
| 10555       | CakSNP10555    | <i>Kabuli</i>    | <i>Ca_Kabuli_Chr06</i>       | 21916465                       | (G/A)       |
| 10556       | CakSNP10556    | <i>Kabuli</i>    | <i>Ca_Kabuli_Chr06</i>       | 21916476                       | (T/C)       |
| 10557       | CakSNP10557    | <i>Kabuli</i>    | <i>Ca_Kabuli_Chr06</i>       | 21940793                       | (T/C)       |
| 10558       | CakSNP10558    | <i>Kabuli</i>    | <i>Ca_Kabuli_Chr06</i>       | 21979846                       | (G/A)       |
| 10559       | CakSNP10559    | <i>Kabuli</i>    | <i>Ca_Kabuli_Chr06</i>       | 21979860                       | (C/T)       |
| 10560       | CakSNP10560    | <i>Kabuli</i>    | <i>Ca_Kabuli_Chr06</i>       | 21979873                       | (A/G)       |
| 10561       | CakSNP10561    | <i>Kabuli</i>    | <i>Ca_Kabuli_Chr06</i>       | 21979887                       | (G/A)       |
| 10562       | CakSNP10562    | <i>Kabuli</i>    | <i>Ca_Kabuli_Chr06</i>       | 21979889                       | (A/G)       |
| 10563       | CakSNP10563    | <i>Kabuli</i>    | <i>Ca_Kabuli_Chr06</i>       | 21979893                       | (C/T)       |
| 10564       | CakSNP10564    | <i>Kabuli</i>    | <i>Ca_Kabuli_Chr06</i>       | 21979903                       | (T/C)       |
| 10565       | CakSNP10565    | <i>Kabuli</i>    | <i>Ca_Kabuli_Chr06</i>       | 22015915                       | (G/T)       |
| 10566       | CakSNP10566    | <i>Kabuli</i>    | <i>Ca_Kabuli_Chr06</i>       | 22016086                       | (A/G)       |
| 10567       | CakSNP10567    | <i>Kabuli</i>    | <i>Ca_Kabuli_Chr06</i>       | 22016767                       | (C/T)       |



| <b>S.N.</b> | <b>SNP IDs</b> | <b>Cultivars</b> | <b>Chromosomes/scaffolds</b> | <b>Physical positions (bp)</b> | <b>SNPs</b> |
|-------------|----------------|------------------|------------------------------|--------------------------------|-------------|
| 10568       | CakSNP10568    | <i>Kabuli</i>    | <i>Ca_Kabuli_Chr06</i>       | 22016839                       | (A/G)       |
| 10569       | CakSNP10569    | <i>Kabuli</i>    | <i>Ca_Kabuli_Chr06</i>       | 22038857                       | (A/G)       |
| 10570       | CakSNP10570    | <i>Kabuli</i>    | <i>Ca_Kabuli_Chr06</i>       | 22038906                       | (A/T)       |
| 10571       | CakSNP10571    | <i>Kabuli</i>    | <i>Ca_Kabuli_Chr06</i>       | 22074809                       | (T/C)       |
| 10572       | CakSNP10572    | <i>Kabuli</i>    | <i>Ca_Kabuli_Chr06</i>       | 22075447                       | (C/G)       |
| 10573       | CakSNP10573    | <i>Kabuli</i>    | <i>Ca_Kabuli_Chr06</i>       | 22079148                       | (A/G)       |
| 10574       | CakSNP10574    | <i>Kabuli</i>    | <i>Ca_Kabuli_Chr06</i>       | 22137477                       | (A/T)       |
| 10575       | CakSNP10575    | <i>Kabuli</i>    | <i>Ca_Kabuli_Chr06</i>       | 22137464                       | (G/A)       |
| 10576       | CakSNP10576    | <i>Kabuli</i>    | <i>Ca_Kabuli_Chr06</i>       | 22137569                       | (G/T)       |
| 10577       | CakSNP10577    | <i>Kabuli</i>    | <i>Ca_Kabuli_Chr06</i>       | 22175547                       | (A/G)       |
| 10578       | CakSNP10578    | <i>Kabuli</i>    | <i>Ca_Kabuli_Chr06</i>       | 22192503                       | (G/A)       |
| 10579       | CakSNP10579    | <i>Kabuli</i>    | <i>Ca_Kabuli_Chr06</i>       | 22192498                       | (A/C)       |
| 10580       | CakSNP10580    | <i>Kabuli</i>    | <i>Ca_Kabuli_Chr06</i>       | 22194387                       | (C/A)       |
| 10581       | CakSNP10581    | <i>Kabuli</i>    | <i>Ca_Kabuli_Chr06</i>       | 22201688                       | (C/T)       |
| 10582       | CakSNP10582    | <i>Kabuli</i>    | <i>Ca_Kabuli_Chr06</i>       | 22206341                       | (G/T)       |
| 10583       | CakSNP10583    | <i>Kabuli</i>    | <i>Ca_Kabuli_Chr06</i>       | 22208130                       | (G/C)       |
| 10584       | CakSNP10584    | <i>Kabuli</i>    | <i>Ca_Kabuli_Chr06</i>       | 22208125                       | (G/A)       |
| 10585       | CakSNP10585    | <i>Kabuli</i>    | <i>Ca_Kabuli_Chr06</i>       | 22208093                       | (G/A)       |
| 10586       | CakSNP10586    | <i>Kabuli</i>    | <i>Ca_Kabuli_Chr06</i>       | 22211721                       | (C/T)       |
| 10587       | CakSNP10587    | <i>Kabuli</i>    | <i>Ca_Kabuli_Chr06</i>       | 22211823                       | (T/C)       |
| 10588       | CakSNP10588    | <i>Kabuli</i>    | <i>Ca_Kabuli_Chr06</i>       | 22217158                       | (A/G)       |
| 10589       | CakSNP10589    | <i>Kabuli</i>    | <i>Ca_Kabuli_Chr06</i>       | 22217157                       | (T/G)       |
| 10590       | CakSNP10590    | <i>Kabuli</i>    | <i>Ca_Kabuli_Chr06</i>       | 22217107                       | (G/A)       |
| 10591       | CakSNP10591    | <i>Kabuli</i>    | <i>Ca_Kabuli_Chr06</i>       | 22225288                       | (T/G)       |
| 10592       | CakSNP10592    | <i>Kabuli</i>    | <i>Ca_Kabuli_Chr06</i>       | 22235449                       | (G/A)       |
| 10593       | CakSNP10593    | <i>Kabuli</i>    | <i>Ca_Kabuli_Chr06</i>       | 22235421                       | (T/A)       |
| 10594       | CakSNP10594    | <i>Kabuli</i>    | <i>Ca_Kabuli_Chr06</i>       | 22236475                       | (T/A)       |
| 10595       | CakSNP10595    | <i>Kabuli</i>    | <i>Ca_Kabuli_Chr06</i>       | 22252149                       | (G/A)       |
| 10596       | CakSNP10596    | <i>Kabuli</i>    | <i>Ca_Kabuli_Chr06</i>       | 22262999                       | (A/C)       |
| 10597       | CakSNP10597    | <i>Kabuli</i>    | <i>Ca_Kabuli_Chr06</i>       | 22263011                       | (T/C)       |
| 10598       | CakSNP10598    | <i>Kabuli</i>    | <i>Ca_Kabuli_Chr06</i>       | 22263388                       | (A/G)       |
| 10599       | CakSNP10599    | <i>Kabuli</i>    | <i>Ca_Kabuli_Chr06</i>       | 22263452                       | (A/T)       |
| 10600       | CakSNP10600    | <i>Kabuli</i>    | <i>Ca_Kabuli_Chr06</i>       | 22279906                       | (T/G)       |
| 10601       | CakSNP10601    | <i>Kabuli</i>    | <i>Ca_Kabuli_Chr06</i>       | 22287922                       | (C/T)       |
| 10602       | CakSNP10602    | <i>Kabuli</i>    | <i>Ca_Kabuli_Chr06</i>       | 22334733                       | (C/T)       |
| 10603       | CakSNP10603    | <i>Kabuli</i>    | <i>Ca_Kabuli_Chr06</i>       | 22352976                       | (T/C)       |
| 10604       | CakSNP10604    | <i>Kabuli</i>    | <i>Ca_Kabuli_Chr06</i>       | 22370242                       | (C/T)       |
| 10605       | CakSNP10605    | <i>Kabuli</i>    | <i>Ca_Kabuli_Chr06</i>       | 22371908                       | (A/C)       |
| 10606       | CakSNP10606    | <i>Kabuli</i>    | <i>Ca_Kabuli_Chr06</i>       | 22446629                       | (G/A)       |

| <b>S.N.</b> | <b>SNP IDs</b> | <b>Cultivars</b> | <b>Chromosomes/scaffolds</b> | <b>Physical positions (bp)</b> | <b>SNPs</b> |
|-------------|----------------|------------------|------------------------------|--------------------------------|-------------|
| 10607       | CakSNP10607    | <i>Kabuli</i>    | <i>Ca_Kabuli_Chr06</i>       | 22446621                       | (A/C)       |
| 10608       | CakSNP10608    | <i>Kabuli</i>    | <i>Ca_Kabuli_Chr06</i>       | 22446610                       | (G/A)       |
| 10609       | CakSNP10609    | <i>Kabuli</i>    | <i>Ca_Kabuli_Chr06</i>       | 22446570                       | (C/T)       |
| 10610       | CakSNP10610    | <i>Kabuli</i>    | <i>Ca_Kabuli_Chr06</i>       | 22446649                       | (C/T)       |
| 10611       | CakSNP10611    | <i>Kabuli</i>    | <i>Ca_Kabuli_Chr06</i>       | 22446644                       | (C/T)       |
| 10612       | CakSNP10612    | <i>Kabuli</i>    | <i>Ca_Kabuli_Chr06</i>       | 22482366                       | (A/C)       |
| 10613       | CakSNP10613    | <i>Kabuli</i>    | <i>Ca_Kabuli_Chr06</i>       | 22498553                       | (T/C)       |
| 10614       | CakSNP10614    | <i>Kabuli</i>    | <i>Ca_Kabuli_Chr06</i>       | 22498867                       | (T/C)       |
| 10615       | CakSNP10615    | <i>Kabuli</i>    | <i>Ca_Kabuli_Chr06</i>       | 22518747                       | (G/T)       |
| 10616       | CakSNP10616    | <i>Kabuli</i>    | <i>Ca_Kabuli_Chr06</i>       | 22879982                       | (C/T)       |
| 10617       | CakSNP10617    | <i>Kabuli</i>    | <i>Ca_Kabuli_Chr06</i>       | 22881176                       | (A/T)       |
| 10618       | CakSNP10618    | <i>Kabuli</i>    | <i>Ca_Kabuli_Chr06</i>       | 22933938                       | (T/A)       |
| 10619       | CakSNP10619    | <i>Kabuli</i>    | <i>Ca_Kabuli_Chr06</i>       | 22952185                       | (G/A)       |
| 10620       | CakSNP10620    | <i>Kabuli</i>    | <i>Ca_Kabuli_Chr06</i>       | 22952253                       | (C/T)       |
| 10621       | CakSNP10621    | <i>Kabuli</i>    | <i>Ca_Kabuli_Chr06</i>       | 22966001                       | (C/A)       |
| 10622       | CakSNP10622    | <i>Kabuli</i>    | <i>Ca_Kabuli_Chr06</i>       | 22986891                       | (T/C)       |
| 10623       | CakSNP10623    | <i>Kabuli</i>    | <i>Ca_Kabuli_Chr06</i>       | 22986869                       | (G/C)       |
| 10624       | CakSNP10624    | <i>Kabuli</i>    | <i>Ca_Kabuli_Chr06</i>       | 23014724                       | (T/A)       |
| 10625       | CakSNP10625    | <i>Kabuli</i>    | <i>Ca_Kabuli_Chr06</i>       | 23039165                       | (T/C)       |
| 10626       | CakSNP10626    | <i>Kabuli</i>    | <i>Ca_Kabuli_Chr06</i>       | 23039147                       | (G/A)       |
| 10627       | CakSNP10627    | <i>Kabuli</i>    | <i>Ca_Kabuli_Chr06</i>       | 23039145                       | (A/G)       |
| 10628       | CakSNP10628    | <i>Kabuli</i>    | <i>Ca_Kabuli_Chr06</i>       | 23039125                       | (G/A)       |
| 10629       | CakSNP10629    | <i>Kabuli</i>    | <i>Ca_Kabuli_Chr06</i>       | 23039097                       | (C/T)       |
| 10630       | CakSNP10630    | <i>Kabuli</i>    | <i>Ca_Kabuli_Chr06</i>       | 23046076                       | (C/T)       |
| 10631       | CakSNP10631    | <i>Kabuli</i>    | <i>Ca_Kabuli_Chr06</i>       | 23113706                       | (A/G)       |
| 10632       | CakSNP10632    | <i>Kabuli</i>    | <i>Ca_Kabuli_Chr06</i>       | 23129516                       | (A/G)       |
| 10633       | CakSNP10633    | <i>Kabuli</i>    | <i>Ca_Kabuli_Chr06</i>       | 23129504                       | (C/G)       |
| 10634       | CakSNP10634    | <i>Kabuli</i>    | <i>Ca_Kabuli_Chr06</i>       | 23145532                       | (T/A)       |
| 10635       | CakSNP10635    | <i>Kabuli</i>    | <i>Ca_Kabuli_Chr06</i>       | 23166355                       | (A/C)       |
| 10636       | CakSNP10636    | <i>Kabuli</i>    | <i>Ca_Kabuli_Chr06</i>       | 23253687                       | (G/A)       |
| 10637       | CakSNP10637    | <i>Kabuli</i>    | <i>Ca_Kabuli_Chr06</i>       | 23253973                       | (G/C)       |
| 10638       | CakSNP10638    | <i>Kabuli</i>    | <i>Ca_Kabuli_Chr06</i>       | 23254642                       | (A/G)       |
| 10639       | CakSNP10639    | <i>Kabuli</i>    | <i>Ca_Kabuli_Chr06</i>       | 23256848                       | (C/G)       |
| 10640       | CakSNP10640    | <i>Kabuli</i>    | <i>Ca_Kabuli_Chr06</i>       | 23256891                       | (T/G)       |
| 10641       | CakSNP10641    | <i>Kabuli</i>    | <i>Ca_Kabuli_Chr06</i>       | 23380746                       | (G/A)       |
| 10642       | CakSNP10642    | <i>Kabuli</i>    | <i>Ca_Kabuli_Chr06</i>       | 23393426                       | (T/C)       |
| 10643       | CakSNP10643    | <i>Kabuli</i>    | <i>Ca_Kabuli_Chr06</i>       | 23393446                       | (A/G)       |
| 10644       | CakSNP10644    | <i>Kabuli</i>    | <i>Ca_Kabuli_Chr06</i>       | 23393469                       | (T/C)       |
| 10645       | CakSNP10645    | <i>Kabuli</i>    | <i>Ca_Kabuli_Chr06</i>       | 23393491                       | (T/G)       |

| <b>S.N.</b> | <b>SNP IDs</b> | <b>Cultivars</b> | <b>Chromosomes/scaffolds</b> | <b>Physical positions (bp)</b> | <b>SNPs</b> |
|-------------|----------------|------------------|------------------------------|--------------------------------|-------------|
| 10646       | CakSNP10646    | <i>Kabuli</i>    | <i>Ca_Kabuli_Chr06</i>       | 23399103                       | (A/G)       |
| 10647       | CakSNP10647    | <i>Kabuli</i>    | <i>Ca_Kabuli_Chr06</i>       | 23424061                       | (T/G)       |
| 10648       | CakSNP10648    | <i>Kabuli</i>    | <i>Ca_Kabuli_Chr06</i>       | 23549220                       | (A/T)       |
| 10649       | CakSNP10649    | <i>Kabuli</i>    | <i>Ca_Kabuli_Chr06</i>       | 23638882                       | (A/G)       |
| 10650       | CakSNP10650    | <i>Kabuli</i>    | <i>Ca_Kabuli_Chr06</i>       | 23663204                       | (C/A)       |
| 10651       | CakSNP10651    | <i>Kabuli</i>    | <i>Ca_Kabuli_Chr06</i>       | 23663201                       | (T/C)       |
| 10652       | CakSNP10652    | <i>Kabuli</i>    | <i>Ca_Kabuli_Chr06</i>       | 23663180                       | (G/T)       |
| 10653       | CakSNP10653    | <i>Kabuli</i>    | <i>Ca_Kabuli_Chr06</i>       | 23688740                       | (C/T)       |
| 10654       | CakSNP10654    | <i>Kabuli</i>    | <i>Ca_Kabuli_Chr06</i>       | 23688723                       | (A/G)       |
| 10655       | CakSNP10655    | <i>Kabuli</i>    | <i>Ca_Kabuli_Chr06</i>       | 23691440                       | (A/C)       |
| 10656       | CakSNP10656    | <i>Kabuli</i>    | <i>Ca_Kabuli_Chr06</i>       | 23766943                       | (C/T)       |
| 10657       | CakSNP10657    | <i>Kabuli</i>    | <i>Ca_Kabuli_Chr06</i>       | 23768142                       | (A/T)       |
| 10658       | CakSNP10658    | <i>Kabuli</i>    | <i>Ca_Kabuli_Chr06</i>       | 23809120                       | (G/A)       |
| 10659       | CakSNP10659    | <i>Kabuli</i>    | <i>Ca_Kabuli_Chr06</i>       | 23890836                       | (A/G)       |
| 10660       | CakSNP10660    | <i>Kabuli</i>    | <i>Ca_Kabuli_Chr06</i>       | 23891065                       | (G/A)       |
| 10661       | CakSNP10661    | <i>Kabuli</i>    | <i>Ca_Kabuli_Chr06</i>       | 23916260                       | (A/G)       |
| 10662       | CakSNP10662    | <i>Kabuli</i>    | <i>Ca_Kabuli_Chr06</i>       | 23963812                       | (T/C)       |
| 10663       | CakSNP10663    | <i>Kabuli</i>    | <i>Ca_Kabuli_Chr06</i>       | 23973410                       | (G/A)       |
| 10664       | CakSNP10664    | <i>Kabuli</i>    | <i>Ca_Kabuli_Chr06</i>       | 24007185                       | (C/T)       |
| 10665       | CakSNP10665    | <i>Kabuli</i>    | <i>Ca_Kabuli_Chr06</i>       | 24007863                       | (T/C)       |
| 10666       | CakSNP10666    | <i>Kabuli</i>    | <i>Ca_Kabuli_Chr06</i>       | 24061578                       | (G/T)       |
| 10667       | CakSNP10667    | <i>Kabuli</i>    | <i>Ca_Kabuli_Chr06</i>       | 24085747                       | (G/T)       |
| 10668       | CakSNP10668    | <i>Kabuli</i>    | <i>Ca_Kabuli_Chr06</i>       | 24085795                       | (C/T)       |
| 10669       | CakSNP10669    | <i>Kabuli</i>    | <i>Ca_Kabuli_Chr06</i>       | 24085807                       | (A/T)       |
| 10670       | CakSNP10670    | <i>Kabuli</i>    | <i>Ca_Kabuli_Chr06</i>       | 24138357                       | (A/G)       |
| 10671       | CakSNP10671    | <i>Kabuli</i>    | <i>Ca_Kabuli_Chr06</i>       | 24138388                       | (T/C)       |
| 10672       | CakSNP10672    | <i>Kabuli</i>    | <i>Ca_Kabuli_Chr06</i>       | 24174940                       | (C/T)       |
| 10673       | CakSNP10673    | <i>Kabuli</i>    | <i>Ca_Kabuli_Chr06</i>       | 24260527                       | (T/C)       |
| 10674       | CakSNP10674    | <i>Kabuli</i>    | <i>Ca_Kabuli_Chr06</i>       | 24301508                       | (T/A)       |
| 10675       | CakSNP10675    | <i>Kabuli</i>    | <i>Ca_Kabuli_Chr06</i>       | 24302205                       | (A/G)       |
| 10676       | CakSNP10676    | <i>Kabuli</i>    | <i>Ca_Kabuli_Chr06</i>       | 24381949                       | (A/G)       |
| 10677       | CakSNP10677    | <i>Kabuli</i>    | <i>Ca_Kabuli_Chr06</i>       | 24381937                       | (G/A)       |
| 10678       | CakSNP10678    | <i>Kabuli</i>    | <i>Ca_Kabuli_Chr06</i>       | 24403316                       | (G/T)       |
| 10679       | CakSNP10679    | <i>Kabuli</i>    | <i>Ca_Kabuli_Chr06</i>       | 24413675                       | (T/C)       |
| 10680       | CakSNP10680    | <i>Kabuli</i>    | <i>Ca_Kabuli_Chr06</i>       | 24413714                       | (G/A)       |
| 10681       | CakSNP10681    | <i>Kabuli</i>    | <i>Ca_Kabuli_Chr06</i>       | 24414512                       | (G/C)       |
| 10682       | CakSNP10682    | <i>Kabuli</i>    | <i>Ca_Kabuli_Chr06</i>       | 24454583                       | (C/T)       |
| 10683       | CakSNP10683    | <i>Kabuli</i>    | <i>Ca_Kabuli_Chr06</i>       | 24454557                       | (T/C)       |
| 10684       | CakSNP10684    | <i>Kabuli</i>    | <i>Ca_Kabuli_Chr06</i>       | 24516523                       | (A/T)       |

| <b>S.N.</b> | <b>SNP IDs</b> | <b>Cultivars</b> | <b>Chromosomes/scaffolds</b> | <b>Physical positions (bp)</b> | <b>SNPs</b> |
|-------------|----------------|------------------|------------------------------|--------------------------------|-------------|
| 10685       | CakSNP10685    | <i>Kabuli</i>    | <i>Ca_Kabuli_Chr06</i>       | 24516528                       | (A/T)       |
| 10686       | CakSNP10686    | <i>Kabuli</i>    | <i>Ca_Kabuli_Chr06</i>       | 24516532                       | (C/T)       |
| 10687       | CakSNP10687    | <i>Kabuli</i>    | <i>Ca_Kabuli_Chr06</i>       | 24547086                       | (T/G)       |
| 10688       | CakSNP10688    | <i>Kabuli</i>    | <i>Ca_Kabuli_Chr06</i>       | 24644924                       | (T/G)       |
| 10689       | CakSNP10689    | <i>Kabuli</i>    | <i>Ca_Kabuli_Chr06</i>       | 24661895                       | (G/A)       |
| 10690       | CakSNP10690    | <i>Kabuli</i>    | <i>Ca_Kabuli_Chr06</i>       | 24661916                       | (C/T)       |
| 10691       | CakSNP10691    | <i>Kabuli</i>    | <i>Ca_Kabuli_Chr06</i>       | 24661937                       | (C/T)       |
| 10692       | CakSNP10692    | <i>Kabuli</i>    | <i>Ca_Kabuli_Chr06</i>       | 24661945                       | (T/A)       |
| 10693       | CakSNP10693    | <i>Kabuli</i>    | <i>Ca_Kabuli_Chr06</i>       | 24661986                       | (G/A)       |
| 10694       | CakSNP10694    | <i>Kabuli</i>    | <i>Ca_Kabuli_Chr06</i>       | 25575097                       | (T/C)       |
| 10695       | CakSNP10695    | <i>Kabuli</i>    | <i>Ca_Kabuli_Chr06</i>       | 25575078                       | (C/T)       |
| 10696       | CakSNP10696    | <i>Kabuli</i>    | <i>Ca_Kabuli_Chr06</i>       | 25575062                       | (G/A)       |
| 10697       | CakSNP10697    | <i>Kabuli</i>    | <i>Ca_Kabuli_Chr06</i>       | 25575045                       | (C/A)       |
| 10698       | CakSNP10698    | <i>Kabuli</i>    | <i>Ca_Kabuli_Chr06</i>       | 25604942                       | (C/A)       |
| 10699       | CakSNP10699    | <i>Kabuli</i>    | <i>Ca_Kabuli_Chr06</i>       | 25604936                       | (C/T)       |
| 10700       | CakSNP10700    | <i>Kabuli</i>    | <i>Ca_Kabuli_Chr06</i>       | 25604931                       | (C/A)       |
| 10701       | CakSNP10701    | <i>Kabuli</i>    | <i>Ca_Kabuli_Chr06</i>       | 25604922                       | (A/G)       |
| 10702       | CakSNP10702    | <i>Kabuli</i>    | <i>Ca_Kabuli_Chr06</i>       | 25604954                       | (C/T)       |
| 10703       | CakSNP10703    | <i>Kabuli</i>    | <i>Ca_Kabuli_Chr06</i>       | 25604962                       | (G/A)       |
| 10704       | CakSNP10704    | <i>Kabuli</i>    | <i>Ca_Kabuli_Chr06</i>       | 25604994                       | (T/C)       |
| 10705       | CakSNP10705    | <i>Kabuli</i>    | <i>Ca_Kabuli_Chr06</i>       | 25605006                       | (C/A)       |
| 10706       | CakSNP10706    | <i>Kabuli</i>    | <i>Ca_Kabuli_Chr06</i>       | 25605023                       | (C/A)       |
| 10707       | CakSNP10707    | <i>Kabuli</i>    | <i>Ca_Kabuli_Chr06</i>       | 25605022                       | (T/C)       |
| 10708       | CakSNP10708    | <i>Kabuli</i>    | <i>Ca_Kabuli_Chr06</i>       | 25850717                       | (C/T)       |
| 10709       | CakSNP10709    | <i>Kabuli</i>    | <i>Ca_Kabuli_Chr06</i>       | 25850725                       | (T/G)       |
| 10710       | CakSNP10710    | <i>Kabuli</i>    | <i>Ca_Kabuli_Chr06</i>       | 25850736                       | (C/T)       |
| 10711       | CakSNP10711    | <i>Kabuli</i>    | <i>Ca_Kabuli_Chr06</i>       | 25850760                       | (T/A)       |
| 10712       | CakSNP10712    | <i>Kabuli</i>    | <i>Ca_Kabuli_Chr06</i>       | 25850759                       | (C/A)       |
| 10713       | CakSNP10713    | <i>Kabuli</i>    | <i>Ca_Kabuli_Chr06</i>       | 25850783                       | (G/A)       |
| 10714       | CakSNP10714    | <i>Kabuli</i>    | <i>Ca_Kabuli_Chr06</i>       | 25850816                       | (C/A)       |
| 10715       | CakSNP10715    | <i>Kabuli</i>    | <i>Ca_Kabuli_Chr06</i>       | 25850813                       | (C/T)       |
| 10716       | CakSNP10716    | <i>Kabuli</i>    | <i>Ca_Kabuli_Chr06</i>       | 25850866                       | (C/G)       |
| 10717       | CakSNP10717    | <i>Kabuli</i>    | <i>Ca_Kabuli_Chr06</i>       | 25850827                       | (C/T)       |
| 10718       | CakSNP10718    | <i>Kabuli</i>    | <i>Ca_Kabuli_Chr06</i>       | 26349363                       | (C/A)       |
| 10719       | CakSNP10719    | <i>Kabuli</i>    | <i>Ca_Kabuli_Chr06</i>       | 26349321                       | (C/T)       |
| 10720       | CakSNP10720    | <i>Kabuli</i>    | <i>Ca_Kabuli_Chr06</i>       | 26349434                       | (G/A)       |
| 10721       | CakSNP10721    | <i>Kabuli</i>    | <i>Ca_Kabuli_Chr06</i>       | 26349451                       | (T/C)       |
| 10722       | CakSNP10722    | <i>Kabuli</i>    | <i>Ca_Kabuli_Chr06</i>       | 26353512                       | (C/T)       |
| 10723       | CakSNP10723    | <i>Kabuli</i>    | <i>Ca_Kabuli_Chr06</i>       | 26353740                       | (G/C)       |

| <b>S.N.</b> | <b>SNP IDs</b> | <b>Cultivars</b> | <b>Chromosomes/scaffolds</b> | <b>Physical positions (bp)</b> | <b>SNPs</b> |
|-------------|----------------|------------------|------------------------------|--------------------------------|-------------|
| 10724       | CakSNP10724    | <i>Kabuli</i>    | <i>Ca_Kabuli_Chr06</i>       | 26357149                       | (C/G)       |
| 10725       | CakSNP10725    | <i>Kabuli</i>    | <i>Ca_Kabuli_Chr06</i>       | 26360367                       | (C/A)       |
| 10726       | CakSNP10726    | <i>Kabuli</i>    | <i>Ca_Kabuli_Chr06</i>       | 26385448                       | (A/G)       |
| 10727       | CakSNP10727    | <i>Kabuli</i>    | <i>Ca_Kabuli_Chr06</i>       | 26385444                       | (C/T)       |
| 10728       | CakSNP10728    | <i>Kabuli</i>    | <i>Ca_Kabuli_Chr06</i>       | 26385432                       | (T/C)       |
| 10729       | CakSNP10729    | <i>Kabuli</i>    | <i>Ca_Kabuli_Chr06</i>       | 26426239                       | (C/A)       |
| 10730       | CakSNP10730    | <i>Kabuli</i>    | <i>Ca_Kabuli_Chr06</i>       | 26426252                       | (A/G)       |
| 10731       | CakSNP10731    | <i>Kabuli</i>    | <i>Ca_Kabuli_Chr06</i>       | 26426283                       | (G/A)       |
| 10732       | CakSNP10732    | <i>Kabuli</i>    | <i>Ca_Kabuli_Chr06</i>       | 26527086                       | (T/C)       |
| 10733       | CakSNP10733    | <i>Kabuli</i>    | <i>Ca_Kabuli_Chr06</i>       | 26527111                       | (G/T)       |
| 10734       | CakSNP10734    | <i>Kabuli</i>    | <i>Ca_Kabuli_Chr06</i>       | 26527161                       | (C/G)       |
| 10735       | CakSNP10735    | <i>Kabuli</i>    | <i>Ca_Kabuli_Chr06</i>       | 26527416                       | (C/T)       |
| 10736       | CakSNP10736    | <i>Kabuli</i>    | <i>Ca_Kabuli_Chr06</i>       | 26549168                       | (T/G)       |
| 10737       | CakSNP10737    | <i>Kabuli</i>    | <i>Ca_Kabuli_Chr06</i>       | 26549181                       | (C/T)       |
| 10738       | CakSNP10738    | <i>Kabuli</i>    | <i>Ca_Kabuli_Chr06</i>       | 26551390                       | (C/T)       |
| 10739       | CakSNP10739    | <i>Kabuli</i>    | <i>Ca_Kabuli_Chr06</i>       | 26551703                       | (T/G)       |
| 10740       | CakSNP10740    | <i>Kabuli</i>    | <i>Ca_Kabuli_Chr06</i>       | 26567360                       | (A/G)       |
| 10741       | CakSNP10741    | <i>Kabuli</i>    | <i>Ca_Kabuli_Chr06</i>       | 26656016                       | (T/C)       |
| 10742       | CakSNP10742    | <i>Kabuli</i>    | <i>Ca_Kabuli_Chr06</i>       | 26698265                       | (A/C)       |
| 10743       | CakSNP10743    | <i>Kabuli</i>    | <i>Ca_Kabuli_Chr06</i>       | 26703130                       | (A/G)       |
| 10744       | CakSNP10744    | <i>Kabuli</i>    | <i>Ca_Kabuli_Chr06</i>       | 26703132                       | (T/C)       |
| 10745       | CakSNP10745    | <i>Kabuli</i>    | <i>Ca_Kabuli_Chr06</i>       | 26767389                       | (T/C)       |
| 10746       | CakSNP10746    | <i>Kabuli</i>    | <i>Ca_Kabuli_Chr06</i>       | 26769087                       | (C/A)       |
| 10747       | CakSNP10747    | <i>Kabuli</i>    | <i>Ca_Kabuli_Chr06</i>       | 26928255                       | (T/C)       |
| 10748       | CakSNP10748    | <i>Kabuli</i>    | <i>Ca_Kabuli_Chr06</i>       | 27053217                       | (A/G)       |
| 10749       | CakSNP10749    | <i>Kabuli</i>    | <i>Ca_Kabuli_Chr06</i>       | 27053288                       | (G/C)       |
| 10750       | CakSNP10750    | <i>Kabuli</i>    | <i>Ca_Kabuli_Chr06</i>       | 27139791                       | (T/C)       |
| 10751       | CakSNP10751    | <i>Kabuli</i>    | <i>Ca_Kabuli_Chr06</i>       | 27139816                       | (T/C)       |
| 10752       | CakSNP10752    | <i>Kabuli</i>    | <i>Ca_Kabuli_Chr06</i>       | 27190671                       | (G/A)       |
| 10753       | CakSNP10753    | <i>Kabuli</i>    | <i>Ca_Kabuli_Chr06</i>       | 27192557                       | (C/T)       |
| 10754       | CakSNP10754    | <i>Kabuli</i>    | <i>Ca_Kabuli_Chr06</i>       | 27310342                       | (A/T)       |
| 10755       | CakSNP10755    | <i>Kabuli</i>    | <i>Ca_Kabuli_Chr06</i>       | 27310341                       | (G/T)       |
| 10756       | CakSNP10756    | <i>Kabuli</i>    | <i>Ca_Kabuli_Chr06</i>       | 27310336                       | (A/T)       |
| 10757       | CakSNP10757    | <i>Kabuli</i>    | <i>Ca_Kabuli_Chr06</i>       | 27310333                       | (C/T)       |
| 10758       | CakSNP10758    | <i>Kabuli</i>    | <i>Ca_Kabuli_Chr06</i>       | 27310328                       | (T/A)       |
| 10759       | CakSNP10759    | <i>Kabuli</i>    | <i>Ca_Kabuli_Chr06</i>       | 27310327                       | (A/T)       |
| 10760       | CakSNP10760    | <i>Kabuli</i>    | <i>Ca_Kabuli_Chr06</i>       | 27310325                       | (G/T)       |
| 10761       | CakSNP10761    | <i>Kabuli</i>    | <i>Ca_Kabuli_Chr06</i>       | 27310315                       | (C/T)       |
| 10762       | CakSNP10762    | <i>Kabuli</i>    | <i>Ca_Kabuli_Chr06</i>       | 27326420                       | (G/A)       |

| <b>S.N.</b> | <b>SNP IDs</b> | <b>Cultivars</b> | <b>Chromosomes/scaffolds</b> | <b>Physical positions (bp)</b> | <b>SNPs</b> |
|-------------|----------------|------------------|------------------------------|--------------------------------|-------------|
| 10763       | CakSNP10763    | <i>Kabuli</i>    | <i>Ca_Kabuli_Chr06</i>       | 27326978                       | (C/T)       |
| 10764       | CakSNP10764    | <i>Kabuli</i>    | <i>Ca_Kabuli_Chr06</i>       | 27330059                       | (T/C)       |
| 10765       | CakSNP10765    | <i>Kabuli</i>    | <i>Ca_Kabuli_Chr06</i>       | 27330159                       | (C/T)       |
| 10766       | CakSNP10766    | <i>Kabuli</i>    | <i>Ca_Kabuli_Chr06</i>       | 27331165                       | (T/C)       |
| 10767       | CakSNP10767    | <i>Kabuli</i>    | <i>Ca_Kabuli_Chr06</i>       | 27331318                       | (A/C)       |
| 10768       | CakSNP10768    | <i>Kabuli</i>    | <i>Ca_Kabuli_Chr06</i>       | 27364381                       | (A/G)       |
| 10769       | CakSNP10769    | <i>Kabuli</i>    | <i>Ca_Kabuli_Chr06</i>       | 27364395                       | (C/T)       |
| 10770       | CakSNP10770    | <i>Kabuli</i>    | <i>Ca_Kabuli_Chr06</i>       | 27364402                       | (T/A)       |
| 10771       | CakSNP10771    | <i>Kabuli</i>    | <i>Ca_Kabuli_Chr06</i>       | 27364428                       | (G/T)       |
| 10772       | CakSNP10772    | <i>Kabuli</i>    | <i>Ca_Kabuli_Chr06</i>       | 27364452                       | (A/T)       |
| 10773       | CakSNP10773    | <i>Kabuli</i>    | <i>Ca_Kabuli_Chr06</i>       | 27383746                       | (A/T)       |
| 10774       | CakSNP10774    | <i>Kabuli</i>    | <i>Ca_Kabuli_Chr06</i>       | 27383745                       | (G/T)       |
| 10775       | CakSNP10775    | <i>Kabuli</i>    | <i>Ca_Kabuli_Chr06</i>       | 27383744                       | (G/T)       |
| 10776       | CakSNP10776    | <i>Kabuli</i>    | <i>Ca_Kabuli_Chr06</i>       | 27383718                       | (C/T)       |
| 10777       | CakSNP10777    | <i>Kabuli</i>    | <i>Ca_Kabuli_Chr06</i>       | 27515184                       | (C/T)       |
| 10778       | CakSNP10778    | <i>Kabuli</i>    | <i>Ca_Kabuli_Chr06</i>       | 27515293                       | (G/A)       |
| 10779       | CakSNP10779    | <i>Kabuli</i>    | <i>Ca_Kabuli_Chr06</i>       | 27537433                       | (A/G)       |
| 10780       | CakSNP10780    | <i>Kabuli</i>    | <i>Ca_Kabuli_Chr06</i>       | 27558154                       | (A/G)       |
| 10781       | CakSNP10781    | <i>Kabuli</i>    | <i>Ca_Kabuli_Chr06</i>       | 27578968                       | (A/G)       |
| 10782       | CakSNP10782    | <i>Kabuli</i>    | <i>Ca_Kabuli_Chr06</i>       | 27592117                       | (G/T)       |
| 10783       | CakSNP10783    | <i>Kabuli</i>    | <i>Ca_Kabuli_Chr06</i>       | 27592070                       | (A/G)       |
| 10784       | CakSNP10784    | <i>Kabuli</i>    | <i>Ca_Kabuli_Chr06</i>       | 27606193                       | (A/C)       |
| 10785       | CakSNP10785    | <i>Kabuli</i>    | <i>Ca_Kabuli_Chr06</i>       | 27606210                       | (C/T)       |
| 10786       | CakSNP10786    | <i>Kabuli</i>    | <i>Ca_Kabuli_Chr06</i>       | 27622037                       | (A/C)       |
| 10787       | CakSNP10787    | <i>Kabuli</i>    | <i>Ca_Kabuli_Chr06</i>       | 27622045                       | (A/G)       |
| 10788       | CakSNP10788    | <i>Kabuli</i>    | <i>Ca_Kabuli_Chr06</i>       | 27622053                       | (A/G)       |
| 10789       | CakSNP10789    | <i>Kabuli</i>    | <i>Ca_Kabuli_Chr06</i>       | 27636256                       | (A/G)       |
| 10790       | CakSNP10790    | <i>Kabuli</i>    | <i>Ca_Kabuli_Chr06</i>       | 27655605                       | (A/G)       |
| 10791       | CakSNP10791    | <i>Kabuli</i>    | <i>Ca_Kabuli_Chr06</i>       | 27660980                       | (C/T)       |
| 10792       | CakSNP10792    | <i>Kabuli</i>    | <i>Ca_Kabuli_Chr06</i>       | 27660971                       | (T/C)       |
| 10793       | CakSNP10793    | <i>Kabuli</i>    | <i>Ca_Kabuli_Chr06</i>       | 27661951                       | (C/T)       |
| 10794       | CakSNP10794    | <i>Kabuli</i>    | <i>Ca_Kabuli_Chr06</i>       | 27662026                       | (C/T)       |
| 10795       | CakSNP10795    | <i>Kabuli</i>    | <i>Ca_Kabuli_Chr06</i>       | 27710531                       | (T/G)       |
| 10796       | CakSNP10796    | <i>Kabuli</i>    | <i>Ca_Kabuli_Chr06</i>       | 27710547                       | (A/T)       |
| 10797       | CakSNP10797    | <i>Kabuli</i>    | <i>Ca_Kabuli_Chr06</i>       | 27842297                       | (G/A)       |
| 10798       | CakSNP10798    | <i>Kabuli</i>    | <i>Ca_Kabuli_Chr06</i>       | 27865048                       | (C/T)       |
| 10799       | CakSNP10799    | <i>Kabuli</i>    | <i>Ca_Kabuli_Chr06</i>       | 27865046                       | (G/A)       |
| 10800       | CakSNP10800    | <i>Kabuli</i>    | <i>Ca_Kabuli_Chr06</i>       | 27864997                       | (C/A)       |
| 10801       | CakSNP10801    | <i>Kabuli</i>    | <i>Ca_Kabuli_Chr06</i>       | 27986719                       | (A/G)       |

| <b>S.N.</b> | <b>SNP IDs</b> | <b>Cultivars</b> | <b>Chromosomes/scaffolds</b> | <b>Physical positions (bp)</b> | <b>SNPs</b> |
|-------------|----------------|------------------|------------------------------|--------------------------------|-------------|
| 10802       | CakSNP10802    | <i>Kabuli</i>    | <i>Ca_Kabuli_Chr06</i>       | 28021899                       | (C/T)       |
| 10803       | CakSNP10803    | <i>Kabuli</i>    | <i>Ca_Kabuli_Chr06</i>       | 28044830                       | (C/A)       |
| 10804       | CakSNP10804    | <i>Kabuli</i>    | <i>Ca_Kabuli_Chr06</i>       | 28052463                       | (T/G)       |
| 10805       | CakSNP10805    | <i>Kabuli</i>    | <i>Ca_Kabuli_Chr06</i>       | 28074393                       | (T/C)       |
| 10806       | CakSNP10806    | <i>Kabuli</i>    | <i>Ca_Kabuli_Chr06</i>       | 28076323                       | (T/A)       |
| 10807       | CakSNP10807    | <i>Kabuli</i>    | <i>Ca_Kabuli_Chr06</i>       | 28076364                       | (T/G)       |
| 10808       | CakSNP10808    | <i>Kabuli</i>    | <i>Ca_Kabuli_Chr06</i>       | 28076436                       | (A/T)       |
| 10809       | CakSNP10809    | <i>Kabuli</i>    | <i>Ca_Kabuli_Chr06</i>       | 28177397                       | (A/C)       |
| 10810       | CakSNP10810    | <i>Kabuli</i>    | <i>Ca_Kabuli_Chr06</i>       | 28325392                       | (C/T)       |
| 10811       | CakSNP10811    | <i>Kabuli</i>    | <i>Ca_Kabuli_Chr06</i>       | 28372130                       | (C/T)       |
| 10812       | CakSNP10812    | <i>Kabuli</i>    | <i>Ca_Kabuli_Chr06</i>       | 28574699                       | (T/C)       |
| 10813       | CakSNP10813    | <i>Kabuli</i>    | <i>Ca_Kabuli_Chr06</i>       | 28575509                       | (T/C)       |
| 10814       | CakSNP10814    | <i>Kabuli</i>    | <i>Ca_Kabuli_Chr06</i>       | 28575491                       | (G/A)       |
| 10815       | CakSNP10815    | <i>Kabuli</i>    | <i>Ca_Kabuli_Chr06</i>       | 28615404                       | (G/T)       |
| 10816       | CakSNP10816    | <i>Kabuli</i>    | <i>Ca_Kabuli_Chr06</i>       | 28615475                       | (A/G)       |
| 10817       | CakSNP10817    | <i>Kabuli</i>    | <i>Ca_Kabuli_Chr06</i>       | 28650056                       | (A/G)       |
| 10818       | CakSNP10818    | <i>Kabuli</i>    | <i>Ca_Kabuli_Chr06</i>       | 28727478                       | (T/C)       |
| 10819       | CakSNP10819    | <i>Kabuli</i>    | <i>Ca_Kabuli_Chr06</i>       | 28728293                       | (A/C)       |
| 10820       | CakSNP10820    | <i>Kabuli</i>    | <i>Ca_Kabuli_Chr06</i>       | 28755298                       | (T/A)       |
| 10821       | CakSNP10821    | <i>Kabuli</i>    | <i>Ca_Kabuli_Chr06</i>       | 28757208                       | (C/A)       |
| 10822       | CakSNP10822    | <i>Kabuli</i>    | <i>Ca_Kabuli_Chr06</i>       | 28757204                       | (G/A)       |
| 10823       | CakSNP10823    | <i>Kabuli</i>    | <i>Ca_Kabuli_Chr06</i>       | 28757139                       | (C/A)       |
| 10824       | CakSNP10824    | <i>Kabuli</i>    | <i>Ca_Kabuli_Chr06</i>       | 28887176                       | (G/A)       |
| 10825       | CakSNP10825    | <i>Kabuli</i>    | <i>Ca_Kabuli_Chr06</i>       | 28887188                       | (G/T)       |
| 10826       | CakSNP10826    | <i>Kabuli</i>    | <i>Ca_Kabuli_Chr06</i>       | 28887201                       | (A/G)       |
| 10827       | CakSNP10827    | <i>Kabuli</i>    | <i>Ca_Kabuli_Chr06</i>       | 28887212                       | (C/T)       |
| 10828       | CakSNP10828    | <i>Kabuli</i>    | <i>Ca_Kabuli_Chr06</i>       | 28892743                       | (G/C)       |
| 10829       | CakSNP10829    | <i>Kabuli</i>    | <i>Ca_Kabuli_Chr06</i>       | 28893411                       | (C/T)       |
| 10830       | CakSNP10830    | <i>Kabuli</i>    | <i>Ca_Kabuli_Chr06</i>       | 28917705                       | (T/A)       |
| 10831       | CakSNP10831    | <i>Kabuli</i>    | <i>Ca_Kabuli_Chr06</i>       | 28947529                       | (A/C)       |
| 10832       | CakSNP10832    | <i>Kabuli</i>    | <i>Ca_Kabuli_Chr06</i>       | 28990518                       | (A/G)       |
| 10833       | CakSNP10833    | <i>Kabuli</i>    | <i>Ca_Kabuli_Chr06</i>       | 29085558                       | (T/C)       |
| 10834       | CakSNP10834    | <i>Kabuli</i>    | <i>Ca_Kabuli_Chr06</i>       | 29163667                       | (C/A)       |
| 10835       | CakSNP10835    | <i>Kabuli</i>    | <i>Ca_Kabuli_Chr06</i>       | 29163714                       | (G/C)       |
| 10836       | CakSNP10836    | <i>Kabuli</i>    | <i>Ca_Kabuli_Chr06</i>       | 29163699                       | (T/A)       |
| 10837       | CakSNP10837    | <i>Kabuli</i>    | <i>Ca_Kabuli_Chr06</i>       | 29163642                       | (G/A)       |
| 10838       | CakSNP10838    | <i>Kabuli</i>    | <i>Ca_Kabuli_Chr06</i>       | 29163640                       | (A/C)       |
| 10839       | CakSNP10839    | <i>Kabuli</i>    | <i>Ca_Kabuli_Chr06</i>       | 29203129                       | (C/G)       |
| 10840       | CakSNP10840    | <i>Kabuli</i>    | <i>Ca_Kabuli_Chr06</i>       | 29203201                       | (G/C)       |

| <b>S.N.</b> | <b>SNP IDs</b> | <b>Cultivars</b> | <b>Chromosomes/scaffolds</b> | <b>Physical positions (bp)</b> | <b>SNPs</b> |
|-------------|----------------|------------------|------------------------------|--------------------------------|-------------|
| 10841       | CakSNP10841    | <i>Kabuli</i>    | <i>Ca_Kabuli_Chr06</i>       | 29203210                       | (T/C)       |
| 10842       | CakSNP10842    | <i>Kabuli</i>    | <i>Ca_Kabuli_Chr06</i>       | 29205260                       | (A/G)       |
| 10843       | CakSNP10843    | <i>Kabuli</i>    | <i>Ca_Kabuli_Chr06</i>       | 29205940                       | (A/G)       |
| 10844       | CakSNP10844    | <i>Kabuli</i>    | <i>Ca_Kabuli_Chr06</i>       | 29206008                       | (A/G)       |
| 10845       | CakSNP10845    | <i>Kabuli</i>    | <i>Ca_Kabuli_Chr06</i>       | 29307254                       | (A/G)       |
| 10846       | CakSNP10846    | <i>Kabuli</i>    | <i>Ca_Kabuli_Chr06</i>       | 29495856                       | (C/T)       |
| 10847       | CakSNP10847    | <i>Kabuli</i>    | <i>Ca_Kabuli_Chr06</i>       | 29934610                       | (A/T)       |
| 10848       | CakSNP10848    | <i>Kabuli</i>    | <i>Ca_Kabuli_Chr06</i>       | 30127756                       | (T/G)       |
| 10849       | CakSNP10849    | <i>Kabuli</i>    | <i>Ca_Kabuli_Chr06</i>       | 30257217                       | (C/T)       |
| 10850       | CakSNP10850    | <i>Kabuli</i>    | <i>Ca_Kabuli_Chr06</i>       | 30257284                       | (A/C)       |
| 10851       | CakSNP10851    | <i>Kabuli</i>    | <i>Ca_Kabuli_Chr06</i>       | 30567073                       | (G/A)       |
| 10852       | CakSNP10852    | <i>Kabuli</i>    | <i>Ca_Kabuli_Chr06</i>       | 30676031                       | (G/T)       |
| 10853       | CakSNP10853    | <i>Kabuli</i>    | <i>Ca_Kabuli_Chr06</i>       | 30676320                       | (T/C)       |
| 10854       | CakSNP10854    | <i>Kabuli</i>    | <i>Ca_Kabuli_Chr06</i>       | 30676248                       | (C/T)       |
| 10855       | CakSNP10855    | <i>Kabuli</i>    | <i>Ca_Kabuli_Chr06</i>       | 30761620                       | (C/T)       |
| 10856       | CakSNP10856    | <i>Kabuli</i>    | <i>Ca_Kabuli_Chr06</i>       | 30761641                       | (G/T)       |
| 10857       | CakSNP10857    | <i>Kabuli</i>    | <i>Ca_Kabuli_Chr06</i>       | 30913932                       | (T/C)       |
| 10858       | CakSNP10858    | <i>Kabuli</i>    | <i>Ca_Kabuli_Chr06</i>       | 30926084                       | (G/A)       |
| 10859       | CakSNP10859    | <i>Kabuli</i>    | <i>Ca_Kabuli_Chr06</i>       | 30927221                       | (C/G)       |
| 10860       | CakSNP10860    | <i>Kabuli</i>    | <i>Ca_Kabuli_Chr06</i>       | 31011743                       | (A/G)       |
| 10861       | CakSNP10861    | <i>Kabuli</i>    | <i>Ca_Kabuli_Chr06</i>       | 31024728                       | (A/T)       |
| 10862       | CakSNP10862    | <i>Kabuli</i>    | <i>Ca_Kabuli_Chr06</i>       | 31025560                       | (C/G)       |
| 10863       | CakSNP10863    | <i>Kabuli</i>    | <i>Ca_Kabuli_Chr06</i>       | 31038808                       | (C/T)       |
| 10864       | CakSNP10864    | <i>Kabuli</i>    | <i>Ca_Kabuli_Chr06</i>       | 31048949                       | (T/C)       |
| 10865       | CakSNP10865    | <i>Kabuli</i>    | <i>Ca_Kabuli_Chr06</i>       | 31057806                       | (C/T)       |
| 10866       | CakSNP10866    | <i>Kabuli</i>    | <i>Ca_Kabuli_Chr06</i>       | 31068678                       | (G/A)       |
| 10867       | CakSNP10867    | <i>Kabuli</i>    | <i>Ca_Kabuli_Chr06</i>       | 31324962                       | (A/C)       |
| 10868       | CakSNP10868    | <i>Kabuli</i>    | <i>Ca_Kabuli_Chr06</i>       | 31324976                       | (A/G)       |
| 10869       | CakSNP10869    | <i>Kabuli</i>    | <i>Ca_Kabuli_Chr06</i>       | 31408895                       | (G/T)       |
| 10870       | CakSNP10870    | <i>Kabuli</i>    | <i>Ca_Kabuli_Chr06</i>       | 31408969                       | (C/T)       |
| 10871       | CakSNP10871    | <i>Kabuli</i>    | <i>Ca_Kabuli_Chr06</i>       | 31495897                       | (C/A)       |
| 10872       | CakSNP10872    | <i>Kabuli</i>    | <i>Ca_Kabuli_Chr06</i>       | 31495903                       | (A/G)       |
| 10873       | CakSNP10873    | <i>Kabuli</i>    | <i>Ca_Kabuli_Chr06</i>       | 31592707                       | (A/C)       |
| 10874       | CakSNP10874    | <i>Kabuli</i>    | <i>Ca_Kabuli_Chr06</i>       | 31595142                       | (A/C)       |
| 10875       | CakSNP10875    | <i>Kabuli</i>    | <i>Ca_Kabuli_Chr06</i>       | 31595136                       | (A/T)       |
| 10876       | CakSNP10876    | <i>Kabuli</i>    | <i>Ca_Kabuli_Chr06</i>       | 31895214                       | (G/C)       |
| 10877       | CakSNP10877    | <i>Kabuli</i>    | <i>Ca_Kabuli_Chr06</i>       | 31895264                       | (C/T)       |
| 10878       | CakSNP10878    | <i>Kabuli</i>    | <i>Ca_Kabuli_Chr06</i>       | 31900781                       | (T/G)       |
| 10879       | CakSNP10879    | <i>Kabuli</i>    | <i>Ca_Kabuli_Chr06</i>       | 31900785                       | (T/G)       |



| <b>S.N.</b> | <b>SNP IDs</b> | <b>Cultivars</b> | <b>Chromosomes/scaffolds</b> | <b>Physical positions (bp)</b> | <b>SNPs</b> |
|-------------|----------------|------------------|------------------------------|--------------------------------|-------------|
| 10880       | CakSNP10880    | <i>Kabuli</i>    | <i>Ca_Kabuli_Chr06</i>       | 31900790                       | (A/C)       |
| 10881       | CakSNP10881    | <i>Kabuli</i>    | <i>Ca_Kabuli_Chr06</i>       | 31966982                       | (C/T)       |
| 10882       | CakSNP10882    | <i>Kabuli</i>    | <i>Ca_Kabuli_Chr06</i>       | 31967089                       | (T/G)       |
| 10883       | CakSNP10883    | <i>Kabuli</i>    | <i>Ca_Kabuli_Chr06</i>       | 31967106                       | (G/A)       |
| 10884       | CakSNP10884    | <i>Kabuli</i>    | <i>Ca_Kabuli_Chr06</i>       | 31967109                       | (T/C)       |
| 10885       | CakSNP10885    | <i>Kabuli</i>    | <i>Ca_Kabuli_Chr06</i>       | 31967144                       | (T/C)       |
| 10886       | CakSNP10886    | <i>Kabuli</i>    | <i>Ca_Kabuli_Chr06</i>       | 31967201                       | (C/T)       |
| 10887       | CakSNP10887    | <i>Kabuli</i>    | <i>Ca_Kabuli_Chr06</i>       | 31967195                       | (G/C)       |
| 10888       | CakSNP10888    | <i>Kabuli</i>    | <i>Ca_Kabuli_Chr06</i>       | 31992907                       | (A/G)       |
| 10889       | CakSNP10889    | <i>Kabuli</i>    | <i>Ca_Kabuli_Chr06</i>       | 32035882                       | (C/T)       |
| 10890       | CakSNP10890    | <i>Kabuli</i>    | <i>Ca_Kabuli_Chr06</i>       | 32036033                       | (G/A)       |
| 10891       | CakSNP10891    | <i>Kabuli</i>    | <i>Ca_Kabuli_Chr06</i>       | 32035976                       | (T/C)       |
| 10892       | CakSNP10892    | <i>Kabuli</i>    | <i>Ca_Kabuli_Chr06</i>       | 32140428                       | (C/A)       |
| 10893       | CakSNP10893    | <i>Kabuli</i>    | <i>Ca_Kabuli_Chr06</i>       | 32140429                       | (G/T)       |
| 10894       | CakSNP10894    | <i>Kabuli</i>    | <i>Ca_Kabuli_Chr06</i>       | 32262807                       | (T/C)       |
| 10895       | CakSNP10895    | <i>Kabuli</i>    | <i>Ca_Kabuli_Chr06</i>       | 32262855                       | (C/T)       |
| 10896       | CakSNP10896    | <i>Kabuli</i>    | <i>Ca_Kabuli_Chr06</i>       | 32328468                       | (T/C)       |
| 10897       | CakSNP10897    | <i>Kabuli</i>    | <i>Ca_Kabuli_Chr06</i>       | 32717450                       | (G/A)       |
| 10898       | CakSNP10898    | <i>Kabuli</i>    | <i>Ca_Kabuli_Chr06</i>       | 32717665                       | (C/A)       |
| 10899       | CakSNP10899    | <i>Kabuli</i>    | <i>Ca_Kabuli_Chr06</i>       | 32825567                       | (C/A)       |
| 10900       | CakSNP10900    | <i>Kabuli</i>    | <i>Ca_Kabuli_Chr06</i>       | 32825561                       | (C/T)       |
| 10901       | CakSNP10901    | <i>Kabuli</i>    | <i>Ca_Kabuli_Chr06</i>       | 32825547                       | (A/G)       |
| 10902       | CakSNP10902    | <i>Kabuli</i>    | <i>Ca_Kabuli_Chr06</i>       | 32825579                       | (C/T)       |
| 10903       | CakSNP10903    | <i>Kabuli</i>    | <i>Ca_Kabuli_Chr06</i>       | 32825587                       | (G/A)       |
| 10904       | CakSNP10904    | <i>Kabuli</i>    | <i>Ca_Kabuli_Chr06</i>       | 32825612                       | (G/A)       |
| 10905       | CakSNP10905    | <i>Kabuli</i>    | <i>Ca_Kabuli_Chr06</i>       | 32825619                       | (T/C)       |
| 10906       | CakSNP10906    | <i>Kabuli</i>    | <i>Ca_Kabuli_Chr06</i>       | 32825631                       | (C/A)       |
| 10907       | CakSNP10907    | <i>Kabuli</i>    | <i>Ca_Kabuli_Chr06</i>       | 32914927                       | (C/G)       |
| 10908       | CakSNP10908    | <i>Kabuli</i>    | <i>Ca_Kabuli_Chr06</i>       | 33502994                       | (C/A)       |
| 10909       | CakSNP10909    | <i>Kabuli</i>    | <i>Ca_Kabuli_Chr06</i>       | 33502997                       | (T/A)       |
| 10910       | CakSNP10910    | <i>Kabuli</i>    | <i>Ca_Kabuli_Chr06</i>       | 33503007                       | (T/C)       |
| 10911       | CakSNP10911    | <i>Kabuli</i>    | <i>Ca_Kabuli_Chr06</i>       | 33503014                       | (G/T)       |
| 10912       | CakSNP10912    | <i>Kabuli</i>    | <i>Ca_Kabuli_Chr06</i>       | 33503020                       | (G/A)       |
| 10913       | CakSNP10913    | <i>Kabuli</i>    | <i>Ca_Kabuli_Chr06</i>       | 33503032                       | (A/C)       |
| 10914       | CakSNP10914    | <i>Kabuli</i>    | <i>Ca_Kabuli_Chr06</i>       | 33503037                       | (A/T)       |
| 10915       | CakSNP10915    | <i>Kabuli</i>    | <i>Ca_Kabuli_Chr06</i>       | 33503051                       | (G/C)       |
| 10916       | CakSNP10916    | <i>Kabuli</i>    | <i>Ca_Kabuli_Chr06</i>       | 33503063                       | (C/G)       |
| 10917       | CakSNP10917    | <i>Kabuli</i>    | <i>Ca_Kabuli_Chr06</i>       | 33503065                       | (C/A)       |
| 10918       | CakSNP10918    | <i>Kabuli</i>    | <i>Ca_Kabuli_Chr06</i>       | 33503071                       | (A/G)       |

| <b>S.N.</b> | <b>SNP IDs</b> | <b>Cultivars</b> | <b>Chromosomes/scaffolds</b> | <b>Physical positions (bp)</b> | <b>SNPs</b> |
|-------------|----------------|------------------|------------------------------|--------------------------------|-------------|
| 10919       | CakSNP10919    | <i>Kabuli</i>    | <i>Ca_Kabuli_Chr06</i>       | 33598926                       | (G/A)       |
| 10920       | CakSNP10920    | <i>Kabuli</i>    | <i>Ca_Kabuli_Chr06</i>       | 33704792                       | (C/T)       |
| 10921       | CakSNP10921    | <i>Kabuli</i>    | <i>Ca_Kabuli_Chr06</i>       | 33704807                       | (C/A)       |
| 10922       | CakSNP10922    | <i>Kabuli</i>    | <i>Ca_Kabuli_Chr06</i>       | 33704839                       | (C/T)       |
| 10923       | CakSNP10923    | <i>Kabuli</i>    | <i>Ca_Kabuli_Chr06</i>       | 33704782                       | (C/T)       |
| 10924       | CakSNP10924    | <i>Kabuli</i>    | <i>Ca_Kabuli_Chr06</i>       | 33733259                       | (A/G)       |
| 10925       | CakSNP10925    | <i>Kabuli</i>    | <i>Ca_Kabuli_Chr06</i>       | 34235650                       | (T/C)       |
| 10926       | CakSNP10926    | <i>Kabuli</i>    | <i>Ca_Kabuli_Chr06</i>       | 34407309                       | (T/C)       |
| 10927       | CakSNP10927    | <i>Kabuli</i>    | <i>Ca_Kabuli_Chr06</i>       | 34481266                       | (A/G)       |
| 10928       | CakSNP10928    | <i>Kabuli</i>    | <i>Ca_Kabuli_Chr06</i>       | 34481256                       | (C/T)       |
| 10929       | CakSNP10929    | <i>Kabuli</i>    | <i>Ca_Kabuli_Chr06</i>       | 34535695                       | (T/C)       |
| 10930       | CakSNP10930    | <i>Kabuli</i>    | <i>Ca_Kabuli_Chr06</i>       | 34535983                       | (T/C)       |
| 10931       | CakSNP10931    | <i>Kabuli</i>    | <i>Ca_Kabuli_Chr06</i>       | 34596792                       | (A/G)       |
| 10932       | CakSNP10932    | <i>Kabuli</i>    | <i>Ca_Kabuli_Chr06</i>       | 34634028                       | (T/A)       |
| 10933       | CakSNP10933    | <i>Kabuli</i>    | <i>Ca_Kabuli_Chr06</i>       | 34744433                       | (A/G)       |
| 10934       | CakSNP10934    | <i>Kabuli</i>    | <i>Ca_Kabuli_Chr06</i>       | 34744438                       | (T/G)       |
| 10935       | CakSNP10935    | <i>Kabuli</i>    | <i>Ca_Kabuli_Chr06</i>       | 34744681                       | (T/G)       |
| 10936       | CakSNP10936    | <i>Kabuli</i>    | <i>Ca_Kabuli_Chr06</i>       | 34744665                       | (G/A)       |
| 10937       | CakSNP10937    | <i>Kabuli</i>    | <i>Ca_Kabuli_Chr06</i>       | 34773476                       | (T/A)       |
| 10938       | CakSNP10938    | <i>Kabuli</i>    | <i>Ca_Kabuli_Chr06</i>       | 34793312                       | (T/G)       |
| 10939       | CakSNP10939    | <i>Kabuli</i>    | <i>Ca_Kabuli_Chr06</i>       | 34974503                       | (C/G)       |
| 10940       | CakSNP10940    | <i>Kabuli</i>    | <i>Ca_Kabuli_Chr06</i>       | 35126227                       | (C/T)       |
| 10941       | CakSNP10941    | <i>Kabuli</i>    | <i>Ca_Kabuli_Chr06</i>       | 35126273                       | (T/C)       |
| 10942       | CakSNP10942    | <i>Kabuli</i>    | <i>Ca_Kabuli_Chr06</i>       | 35126389                       | (G/T)       |
| 10943       | CakSNP10943    | <i>Kabuli</i>    | <i>Ca_Kabuli_Chr06</i>       | 35129588                       | (G/A)       |
| 10944       | CakSNP10944    | <i>Kabuli</i>    | <i>Ca_Kabuli_Chr06</i>       | 35596037                       | (C/A)       |
| 10945       | CakSNP10945    | <i>Kabuli</i>    | <i>Ca_Kabuli_Chr06</i>       | 35596048                       | (G/A)       |
| 10946       | CakSNP10946    | <i>Kabuli</i>    | <i>Ca_Kabuli_Chr06</i>       | 35596064                       | (T/C)       |
| 10947       | CakSNP10947    | <i>Kabuli</i>    | <i>Ca_Kabuli_Chr06</i>       | 35596070                       | (G/A)       |
| 10948       | CakSNP10948    | <i>Kabuli</i>    | <i>Ca_Kabuli_Chr06</i>       | 35596161                       | (C/T)       |
| 10949       | CakSNP10949    | <i>Kabuli</i>    | <i>Ca_Kabuli_Chr06</i>       | 35596174                       | (G/A)       |
| 10950       | CakSNP10950    | <i>Kabuli</i>    | <i>Ca_Kabuli_Chr06</i>       | 35596184                       | (A/G)       |
| 10951       | CakSNP10951    | <i>Kabuli</i>    | <i>Ca_Kabuli_Chr06</i>       | 35596195                       | (G/C)       |
| 10952       | CakSNP10952    | <i>Kabuli</i>    | <i>Ca_Kabuli_Chr06</i>       | 35596197                       | (G/A)       |
| 10953       | CakSNP10953    | <i>Kabuli</i>    | <i>Ca_Kabuli_Chr06</i>       | 35596207                       | (G/T)       |
| 10954       | CakSNP10954    | <i>Kabuli</i>    | <i>Ca_Kabuli_Chr06</i>       | 35596218                       | (T/C)       |
| 10955       | CakSNP10955    | <i>Kabuli</i>    | <i>Ca_Kabuli_Chr06</i>       | 35596220                       | (G/A)       |
| 10956       | CakSNP10956    | <i>Kabuli</i>    | <i>Ca_Kabuli_Chr06</i>       | 35596230                       | (T/A)       |
| 10957       | CakSNP10957    | <i>Kabuli</i>    | <i>Ca_Kabuli_Chr06</i>       | 35596300                       | (G/A)       |

| <b>S.N.</b> | <b>SNP IDs</b> | <b>Cultivars</b> | <b>Chromosomes/scaffolds</b> | <b>Physical positions (bp)</b> | <b>SNPs</b> |
|-------------|----------------|------------------|------------------------------|--------------------------------|-------------|
| 10958       | CakSNP10958    | <i>Kabuli</i>    | <i>Ca_Kabuli_Chr06</i>       | 35628131                       | (T/C)       |
| 10959       | CakSNP10959    | <i>Kabuli</i>    | <i>Ca_Kabuli_Chr06</i>       | 35719930                       | (A/C)       |
| 10960       | CakSNP10960    | <i>Kabuli</i>    | <i>Ca_Kabuli_Chr06</i>       | 35743792                       | (A/G)       |
| 10961       | CakSNP10961    | <i>Kabuli</i>    | <i>Ca_Kabuli_Chr06</i>       | 35962309                       | (C/T)       |
| 10962       | CakSNP10962    | <i>Kabuli</i>    | <i>Ca_Kabuli_Chr06</i>       | 35962320                       | (T/C)       |
| 10963       | CakSNP10963    | <i>Kabuli</i>    | <i>Ca_Kabuli_Chr06</i>       | 35962360                       | (T/C)       |
| 10964       | CakSNP10964    | <i>Kabuli</i>    | <i>Ca_Kabuli_Chr06</i>       | 35962364                       | (T/G)       |
| 10965       | CakSNP10965    | <i>Kabuli</i>    | <i>Ca_Kabuli_Chr06</i>       | 35962365                       | (T/C)       |
| 10966       | CakSNP10966    | <i>Kabuli</i>    | <i>Ca_Kabuli_Chr06</i>       | 35962366                       | (G/A)       |
| 10967       | CakSNP10967    | <i>Kabuli</i>    | <i>Ca_Kabuli_Chr06</i>       | 36094855                       | (T/G)       |
| 10968       | CakSNP10968    | <i>Kabuli</i>    | <i>Ca_Kabuli_Chr06</i>       | 36371775                       | (A/G)       |
| 10969       | CakSNP10969    | <i>Kabuli</i>    | <i>Ca_Kabuli_Chr06</i>       | 36374561                       | (C/T)       |
| 10970       | CakSNP10970    | <i>Kabuli</i>    | <i>Ca_Kabuli_Chr06</i>       | 36574836                       | (A/G)       |
| 10971       | CakSNP10971    | <i>Kabuli</i>    | <i>Ca_Kabuli_Chr06</i>       | 36790467                       | (G/A)       |
| 10972       | CakSNP10972    | <i>Kabuli</i>    | <i>Ca_Kabuli_Chr06</i>       | 36790458                       | (G/A)       |
| 10973       | CakSNP10973    | <i>Kabuli</i>    | <i>Ca_Kabuli_Chr06</i>       | 36790428                       | (G/A)       |
| 10974       | CakSNP10974    | <i>Kabuli</i>    | <i>Ca_Kabuli_Chr06</i>       | 36790455                       | (C/T)       |
| 10975       | CakSNP10975    | <i>Kabuli</i>    | <i>Ca_Kabuli_Chr06</i>       | 36790460                       | (A/G)       |
| 10976       | CakSNP10976    | <i>Kabuli</i>    | <i>Ca_Kabuli_Chr06</i>       | 37139425                       | (C/T)       |
| 10977       | CakSNP10977    | <i>Kabuli</i>    | <i>Ca_Kabuli_Chr06</i>       | 37139466                       | (G/C)       |
| 10978       | CakSNP10978    | <i>Kabuli</i>    | <i>Ca_Kabuli_Chr06</i>       | 37139484                       | (T/C)       |
| 10979       | CakSNP10979    | <i>Kabuli</i>    | <i>Ca_Kabuli_Chr06</i>       | 37139486                       | (G/A)       |
| 10980       | CakSNP10980    | <i>Kabuli</i>    | <i>Ca_Kabuli_Chr06</i>       | 37139533                       | (T/A)       |
| 10981       | CakSNP10981    | <i>Kabuli</i>    | <i>Ca_Kabuli_Chr06</i>       | 37139514                       | (C/T)       |
| 10982       | CakSNP10982    | <i>Kabuli</i>    | <i>Ca_Kabuli_Chr06</i>       | 37139499                       | (C/G)       |
| 10983       | CakSNP10983    | <i>Kabuli</i>    | <i>Ca_Kabuli_Chr06</i>       | 37139610                       | (T/G)       |
| 10984       | CakSNP10984    | <i>Kabuli</i>    | <i>Ca_Kabuli_Chr06</i>       | 37139604                       | (G/T)       |
| 10985       | CakSNP10985    | <i>Kabuli</i>    | <i>Ca_Kabuli_Chr06</i>       | 37321783                       | (A/T)       |
| 10986       | CakSNP10986    | <i>Kabuli</i>    | <i>Ca_Kabuli_Chr06</i>       | 37476426                       | (C/T)       |
| 10987       | CakSNP10987    | <i>Kabuli</i>    | <i>Ca_Kabuli_Chr06</i>       | 37476437                       | (A/C)       |
| 10988       | CakSNP10988    | <i>Kabuli</i>    | <i>Ca_Kabuli_Chr06</i>       | 37476516                       | (G/T)       |
| 10989       | CakSNP10989    | <i>Kabuli</i>    | <i>Ca_Kabuli_Chr06</i>       | 37476465                       | (G/A)       |
| 10990       | CakSNP10990    | <i>Kabuli</i>    | <i>Ca_Kabuli_Chr06</i>       | 37484467                       | (C/T)       |
| 10991       | CakSNP10991    | <i>Kabuli</i>    | <i>Ca_Kabuli_Chr06</i>       | 37484468                       | (G/T)       |
| 10992       | CakSNP10992    | <i>Kabuli</i>    | <i>Ca_Kabuli_Chr06</i>       | 37484470                       | (C/A)       |
| 10993       | CakSNP10993    | <i>Kabuli</i>    | <i>Ca_Kabuli_Chr06</i>       | 37484489                       | (C/G)       |
| 10994       | CakSNP10994    | <i>Kabuli</i>    | <i>Ca_Kabuli_Chr06</i>       | 37484513                       | (T/C)       |
| 10995       | CakSNP10995    | <i>Kabuli</i>    | <i>Ca_Kabuli_Chr06</i>       | 38816345                       | (C/T)       |
| 10996       | CakSNP10996    | <i>Kabuli</i>    | <i>Ca_Kabuli_Chr06</i>       | 38838320                       | (A/G)       |

| <b>S.N.</b> | <b>SNP IDs</b> | <b>Cultivars</b> | <b>Chromosomes/scaffolds</b> | <b>Physical positions (bp)</b> | <b>SNPs</b> |
|-------------|----------------|------------------|------------------------------|--------------------------------|-------------|
| 10997       | CakSNP10997    | <i>Kabuli</i>    | <i>Ca_Kabuli_Chr06</i>       | 38840279                       | (G/A)       |
| 10998       | CakSNP10998    | <i>Kabuli</i>    | <i>Ca_Kabuli_Chr06</i>       | 38840315                       | (G/A)       |
| 10999       | CakSNP10999    | <i>Kabuli</i>    | <i>Ca_Kabuli_Chr06</i>       | 38840273                       | (G/A)       |
| 11000       | CakSNP11000    | <i>Kabuli</i>    | <i>Ca_Kabuli_Chr06</i>       | 38881909                       | (C/A)       |
| 11001       | CakSNP11001    | <i>Kabuli</i>    | <i>Ca_Kabuli_Chr06</i>       | 38886735                       | (C/A)       |
| 11002       | CakSNP11002    | <i>Kabuli</i>    | <i>Ca_Kabuli_Chr06</i>       | 38994879                       | (A/G)       |
| 11003       | CakSNP11003    | <i>Kabuli</i>    | <i>Ca_Kabuli_Chr06</i>       | 38994925                       | (G/T)       |
| 11004       | CakSNP11004    | <i>Kabuli</i>    | <i>Ca_Kabuli_Chr06</i>       | 38994954                       | (A/G)       |
| 11005       | CakSNP11005    | <i>Kabuli</i>    | <i>Ca_Kabuli_Chr06</i>       | 38994962                       | (G/A)       |
| 11006       | CakSNP11006    | <i>Kabuli</i>    | <i>Ca_Kabuli_Chr06</i>       | 39028564                       | (T/G)       |
| 11007       | CakSNP11007    | <i>Kabuli</i>    | <i>Ca_Kabuli_Chr06</i>       | 39107187                       | (C/T)       |
| 11008       | CakSNP11008    | <i>Kabuli</i>    | <i>Ca_Kabuli_Chr06</i>       | 39107149                       | (A/C)       |
| 11009       | CakSNP11009    | <i>Kabuli</i>    | <i>Ca_Kabuli_Chr06</i>       | 39107188                       | (A/C)       |
| 11010       | CakSNP11010    | <i>Kabuli</i>    | <i>Ca_Kabuli_Chr06</i>       | 39317016                       | (T/G)       |
| 11011       | CakSNP11011    | <i>Kabuli</i>    | <i>Ca_Kabuli_Chr06</i>       | 39380625                       | (A/C)       |
| 11012       | CakSNP11012    | <i>Kabuli</i>    | <i>Ca_Kabuli_Chr06</i>       | 39908314                       | (T/G)       |
| 11013       | CakSNP11013    | <i>Kabuli</i>    | <i>Ca_Kabuli_Chr06</i>       | 40047823                       | (A/G)       |
| 11014       | CakSNP11014    | <i>Kabuli</i>    | <i>Ca_Kabuli_Chr06</i>       | 40128644                       | (T/C)       |
| 11015       | CakSNP11015    | <i>Kabuli</i>    | <i>Ca_Kabuli_Chr06</i>       | 40468356                       | (T/A)       |
| 11016       | CakSNP11016    | <i>Kabuli</i>    | <i>Ca_Kabuli_Chr06</i>       | 40477285                       | (G/A)       |
| 11017       | CakSNP11017    | <i>Kabuli</i>    | <i>Ca_Kabuli_Chr06</i>       | 40657695                       | (A/C)       |
| 11018       | CakSNP11018    | <i>Kabuli</i>    | <i>Ca_Kabuli_Chr06</i>       | 40735186                       | (C/A)       |
| 11019       | CakSNP11019    | <i>Kabuli</i>    | <i>Ca_Kabuli_Chr06</i>       | 40767566                       | (A/G)       |
| 11020       | CakSNP11020    | <i>Kabuli</i>    | <i>Ca_Kabuli_Chr06</i>       | 40821354                       | (C/T)       |
| 11021       | CakSNP11021    | <i>Kabuli</i>    | <i>Ca_Kabuli_Chr06</i>       | 40935441                       | (A/T)       |
| 11022       | CakSNP11022    | <i>Kabuli</i>    | <i>Ca_Kabuli_Chr06</i>       | 41121337                       | (C/T)       |
| 11023       | CakSNP11023    | <i>Kabuli</i>    | <i>Ca_Kabuli_Chr06</i>       | 41121330                       | (G/A)       |
| 11024       | CakSNP11024    | <i>Kabuli</i>    | <i>Ca_Kabuli_Chr06</i>       | 41363546                       | (G/A)       |
| 11025       | CakSNP11025    | <i>Kabuli</i>    | <i>Ca_Kabuli_Chr06</i>       | 41420918                       | (T/A)       |
| 11026       | CakSNP11026    | <i>Kabuli</i>    | <i>Ca_Kabuli_Chr06</i>       | 41420917                       | (A/G)       |
| 11027       | CakSNP11027    | <i>Kabuli</i>    | <i>Ca_Kabuli_Chr06</i>       | 41449028                       | (C/T)       |
| 11028       | CakSNP11028    | <i>Kabuli</i>    | <i>Ca_Kabuli_Chr06</i>       | 41682983                       | (T/C)       |
| 11029       | CakSNP11029    | <i>Kabuli</i>    | <i>Ca_Kabuli_Chr06</i>       | 41682966                       | (C/T)       |
| 11030       | CakSNP11030    | <i>Kabuli</i>    | <i>Ca_Kabuli_Chr06</i>       | 41682943                       | (T/C)       |
| 11031       | CakSNP11031    | <i>Kabuli</i>    | <i>Ca_Kabuli_Chr06</i>       | 41697812                       | (T/G)       |
| 11032       | CakSNP11032    | <i>Kabuli</i>    | <i>Ca_Kabuli_Chr06</i>       | 41708309                       | (G/A)       |
| 11033       | CakSNP11033    | <i>Kabuli</i>    | <i>Ca_Kabuli_Chr06</i>       | 41708306                       | (G/A)       |
| 11034       | CakSNP11034    | <i>Kabuli</i>    | <i>Ca_Kabuli_Chr06</i>       | 41708523                       | (T/G)       |
| 11035       | CakSNP11035    | <i>Kabuli</i>    | <i>Ca_Kabuli_Chr06</i>       | 41708474                       | (G/A)       |

| <b>S.N.</b> | <b>SNP IDs</b> | <b>Cultivars</b> | <b>Chromosomes/scaffolds</b> | <b>Physical positions (bp)</b> | <b>SNPs</b> |
|-------------|----------------|------------------|------------------------------|--------------------------------|-------------|
| 11036       | CakSNP11036    | <i>Kabuli</i>    | <i>Ca_Kabuli_Ch06</i>        | 41708530                       | (C/A)       |
| 11037       | CakSNP11037    | <i>Kabuli</i>    | <i>Ca_Kabuli_Ch06</i>        | 41907459                       | (C/G)       |
| 11038       | CakSNP11038    | <i>Kabuli</i>    | <i>Ca_Kabuli_Ch06</i>        | 42004851                       | (A/G)       |
| 11039       | CakSNP11039    | <i>Kabuli</i>    | <i>Ca_Kabuli_Ch06</i>        | 42004829                       | (T/G)       |
| 11040       | CakSNP11040    | <i>Kabuli</i>    | <i>Ca_Kabuli_Ch06</i>        | 42004818                       | (C/G)       |
| 11041       | CakSNP11041    | <i>Kabuli</i>    | <i>Ca_Kabuli_Ch06</i>        | 42004813                       | (C/T)       |
| 11042       | CakSNP11042    | <i>Kabuli</i>    | <i>Ca_Kabuli_Ch06</i>        | 42161851                       | (A/G)       |
| 11043       | CakSNP11043    | <i>Kabuli</i>    | <i>Ca_Kabuli_Ch06</i>        | 42161857                       | (C/G)       |
| 11044       | CakSNP11044    | <i>Kabuli</i>    | <i>Ca_Kabuli_Ch06</i>        | 42161866                       | (T/G)       |
| 11045       | CakSNP11045    | <i>Kabuli</i>    | <i>Ca_Kabuli_Ch06</i>        | 42521162                       | (G/T)       |
| 11046       | CakSNP11046    | <i>Kabuli</i>    | <i>Ca_Kabuli_Ch06</i>        | 42855091                       | (T/G)       |
| 11047       | CakSNP11047    | <i>Kabuli</i>    | <i>Ca_Kabuli_Ch06</i>        | 42904998                       | (C/G)       |
| 11048       | CakSNP11048    | <i>Kabuli</i>    | <i>Ca_Kabuli_Ch06</i>        | 42905012                       | (G/A)       |
| 11049       | CakSNP11049    | <i>Kabuli</i>    | <i>Ca_Kabuli_Ch06</i>        | 42905039                       | (C/T)       |
| 11050       | CakSNP11050    | <i>Kabuli</i>    | <i>Ca_Kabuli_Ch06</i>        | 42905035                       | (T/A)       |
| 11051       | CakSNP11051    | <i>Kabuli</i>    | <i>Ca_Kabuli_Ch06</i>        | 42905111                       | (T/C)       |
| 11052       | CakSNP11052    | <i>Kabuli</i>    | <i>Ca_Kabuli_Ch06</i>        | 42905094                       | (C/T)       |
| 11053       | CakSNP11053    | <i>Kabuli</i>    | <i>Ca_Kabuli_Ch06</i>        | 42905090                       | (G/A)       |
| 11054       | CakSNP11054    | <i>Kabuli</i>    | <i>Ca_Kabuli_Ch06</i>        | 42905086                       | (T/C)       |
| 11055       | CakSNP11055    | <i>Kabuli</i>    | <i>Ca_Kabuli_Ch06</i>        | 42905058                       | (C/G)       |
| 11056       | CakSNP11056    | <i>Kabuli</i>    | <i>Ca_Kabuli_Ch06</i>        | 42905059                       | (A/G)       |
| 11057       | CakSNP11057    | <i>Kabuli</i>    | <i>Ca_Kabuli_Ch06</i>        | 42905072                       | (T/C)       |
| 11058       | CakSNP11058    | <i>Kabuli</i>    | <i>Ca_Kabuli_Ch06</i>        | 42905115                       | (G/T)       |
| 11059       | CakSNP11059    | <i>Kabuli</i>    | <i>Ca_Kabuli_Ch06</i>        | 42905116                       | (A/T)       |
| 11060       | CakSNP11060    | <i>Kabuli</i>    | <i>Ca_Kabuli_Ch06</i>        | 42919899                       | (G/A)       |
| 11061       | CakSNP11061    | <i>Kabuli</i>    | <i>Ca_Kabuli_Ch06</i>        | 42923969                       | (A/C)       |
| 11062       | CakSNP11062    | <i>Kabuli</i>    | <i>Ca_Kabuli_Ch06</i>        | 42925974                       | (C/T)       |
| 11063       | CakSNP11063    | <i>Kabuli</i>    | <i>Ca_Kabuli_Ch06</i>        | 43148829                       | (C/T)       |
| 11064       | CakSNP11064    | <i>Kabuli</i>    | <i>Ca_Kabuli_Ch06</i>        | 43148824                       | (C/A)       |
| 11065       | CakSNP11065    | <i>Kabuli</i>    | <i>Ca_Kabuli_Ch06</i>        | 43148784                       | (C/G)       |
| 11066       | CakSNP11066    | <i>Kabuli</i>    | <i>Ca_Kabuli_Ch06</i>        | 43905509                       | (A/T)       |
| 11067       | CakSNP11067    | <i>Kabuli</i>    | <i>Ca_Kabuli_Ch06</i>        | 43907445                       | (T/C)       |
| 11068       | CakSNP11068    | <i>Kabuli</i>    | <i>Ca_Kabuli_Ch06</i>        | 44530888                       | (C/A)       |
| 11069       | CakSNP11069    | <i>Kabuli</i>    | <i>Ca_Kabuli_Ch06</i>        | 44530889                       | (A/G)       |
| 11070       | CakSNP11070    | <i>Kabuli</i>    | <i>Ca_Kabuli_Ch06</i>        | 44707313                       | (T/A)       |
| 11071       | CakSNP11071    | <i>Kabuli</i>    | <i>Ca_Kabuli_Ch06</i>        | 44711166                       | (A/G)       |
| 11072       | CakSNP11072    | <i>Kabuli</i>    | <i>Ca_Kabuli_Ch06</i>        | 44792535                       | (C/T)       |
| 11073       | CakSNP11073    | <i>Kabuli</i>    | <i>Ca_Kabuli_Ch06</i>        | 44792529                       | (G/C)       |
| 11074       | CakSNP11074    | <i>Kabuli</i>    | <i>Ca_Kabuli_Ch06</i>        | 44792493                       | (C/T)       |

| <b>S.N.</b> | <b>SNP IDs</b> | <b>Cultivars</b> | <b>Chromosomes/scaffolds</b> | <b>Physical positions (bp)</b> | <b>SNPs</b> |
|-------------|----------------|------------------|------------------------------|--------------------------------|-------------|
| 11075       | CakSNP11075    | <i>Kabuli</i>    | <i>Ca_Kabuli_Chr06</i>       | 44792486                       | (G/A)       |
| 11076       | CakSNP11076    | <i>Kabuli</i>    | <i>Ca_Kabuli_Chr06</i>       | 44937666                       | (C/T)       |
| 11077       | CakSNP11077    | <i>Kabuli</i>    | <i>Ca_Kabuli_Chr06</i>       | 44944917                       | (G/A)       |
| 11078       | CakSNP11078    | <i>Kabuli</i>    | <i>Ca_Kabuli_Chr06</i>       | 45053093                       | (A/G)       |
| 11079       | CakSNP11079    | <i>Kabuli</i>    | <i>Ca_Kabuli_Chr06</i>       | 45053214                       | (C/T)       |
| 11080       | CakSNP11080    | <i>Kabuli</i>    | <i>Ca_Kabuli_Chr06</i>       | 45131295                       | (C/T)       |
| 11081       | CakSNP11081    | <i>Kabuli</i>    | <i>Ca_Kabuli_Chr06</i>       | 45132545                       | (A/G)       |
| 11082       | CakSNP11082    | <i>Kabuli</i>    | <i>Ca_Kabuli_Chr06</i>       | 45178060                       | (G/A)       |
| 11083       | CakSNP11083    | <i>Kabuli</i>    | <i>Ca_Kabuli_Chr06</i>       | 45178056                       | (A/G)       |
| 11084       | CakSNP11084    | <i>Kabuli</i>    | <i>Ca_Kabuli_Chr06</i>       | 45178045                       | (G/T)       |
| 11085       | CakSNP11085    | <i>Kabuli</i>    | <i>Ca_Kabuli_Chr06</i>       | 45178044                       | (G/A)       |
| 11086       | CakSNP11086    | <i>Kabuli</i>    | <i>Ca_Kabuli_Chr06</i>       | 45178033                       | (C/A)       |
| 11087       | CakSNP11087    | <i>Kabuli</i>    | <i>Ca_Kabuli_Chr06</i>       | 45178061                       | (C/T)       |
| 11088       | CakSNP11088    | <i>Kabuli</i>    | <i>Ca_Kabuli_Chr06</i>       | 45201783                       | (C/T)       |
| 11089       | CakSNP11089    | <i>Kabuli</i>    | <i>Ca_Kabuli_Chr06</i>       | 45293271                       | (T/C)       |
| 11090       | CakSNP11090    | <i>Kabuli</i>    | <i>Ca_Kabuli_Chr06</i>       | 45500961                       | (T/A)       |
| 11091       | CakSNP11091    | <i>Kabuli</i>    | <i>Ca_Kabuli_Chr06</i>       | 45501099                       | (C/A)       |
| 11092       | CakSNP11092    | <i>Kabuli</i>    | <i>Ca_Kabuli_Chr06</i>       | 45505942                       | (A/G)       |
| 11093       | CakSNP11093    | <i>Kabuli</i>    | <i>Ca_Kabuli_Chr06</i>       | 45550031                       | (C/A)       |
| 11094       | CakSNP11094    | <i>Kabuli</i>    | <i>Ca_Kabuli_Chr06</i>       | 45554040                       | (G/A)       |
| 11095       | CakSNP11095    | <i>Kabuli</i>    | <i>Ca_Kabuli_Chr06</i>       | 45557656                       | (T/C)       |
| 11096       | CakSNP11096    | <i>Kabuli</i>    | <i>Ca_Kabuli_Chr06</i>       | 45614017                       | (T/C)       |
| 11097       | CakSNP11097    | <i>Kabuli</i>    | <i>Ca_Kabuli_Chr06</i>       | 45637271                       | (T/G)       |
| 11098       | CakSNP11098    | <i>Kabuli</i>    | <i>Ca_Kabuli_Chr06</i>       | 45637292                       | (C/A)       |
| 11099       | CakSNP11099    | <i>Kabuli</i>    | <i>Ca_Kabuli_Chr06</i>       | 45637293                       | (T/C)       |
| 11100       | CakSNP11100    | <i>Kabuli</i>    | <i>Ca_Kabuli_Chr06</i>       | 45637322                       | (C/A)       |
| 11101       | CakSNP11101    | <i>Kabuli</i>    | <i>Ca_Kabuli_Chr06</i>       | 45637309                       | (G/A)       |
| 11102       | CakSNP11102    | <i>Kabuli</i>    | <i>Ca_Kabuli_Chr06</i>       | 45637308                       | (G/T)       |
| 11103       | CakSNP11103    | <i>Kabuli</i>    | <i>Ca_Kabuli_Chr06</i>       | 45693275                       | (G/A)       |
| 11104       | CakSNP11104    | <i>Kabuli</i>    | <i>Ca_Kabuli_Chr06</i>       | 45695051                       | (T/G)       |
| 11105       | CakSNP11105    | <i>Kabuli</i>    | <i>Ca_Kabuli_Chr06</i>       | 45695043                       | (C/T)       |
| 11106       | CakSNP11106    | <i>Kabuli</i>    | <i>Ca_Kabuli_Chr06</i>       | 45695035                       | (G/A)       |
| 11107       | CakSNP11107    | <i>Kabuli</i>    | <i>Ca_Kabuli_Chr06</i>       | 45709318                       | (T/C)       |
| 11108       | CakSNP11108    | <i>Kabuli</i>    | <i>Ca_Kabuli_Chr06</i>       | 45773318                       | (C/T)       |
| 11109       | CakSNP11109    | <i>Kabuli</i>    | <i>Ca_Kabuli_Chr06</i>       | 45773309                       | (A/G)       |
| 11110       | CakSNP11110    | <i>Kabuli</i>    | <i>Ca_Kabuli_Chr06</i>       | 45773298                       | (C/G)       |
| 11111       | CakSNP11111    | <i>Kabuli</i>    | <i>Ca_Kabuli_Chr06</i>       | 45773409                       | (T/A)       |
| 11112       | CakSNP11112    | <i>Kabuli</i>    | <i>Ca_Kabuli_Chr06</i>       | 45773408                       | (T/A)       |
| 11113       | CakSNP11113    | <i>Kabuli</i>    | <i>Ca_Kabuli_Chr06</i>       | 45773373                       | (G/T)       |

| <b>S.N.</b> | <b>SNP IDs</b> | <b>Cultivars</b> | <b>Chromosomes/scaffolds</b> | <b>Physical positions (bp)</b> | <b>SNPs</b> |
|-------------|----------------|------------------|------------------------------|--------------------------------|-------------|
| 11114       | CakSNP11114    | <i>Kabuli</i>    | <i>Ca_Kabuli_Chr06</i>       | 45773367                       | (G/T)       |
| 11115       | CakSNP11115    | <i>Kabuli</i>    | <i>Ca_Kabuli_Chr06</i>       | 45773349                       | (C/T)       |
| 11116       | CakSNP11116    | <i>Kabuli</i>    | <i>Ca_Kabuli_Chr06</i>       | 45812152                       | (G/A)       |
| 11117       | CakSNP11117    | <i>Kabuli</i>    | <i>Ca_Kabuli_Chr06</i>       | 45976962                       | (G/A)       |
| 11118       | CakSNP11118    | <i>Kabuli</i>    | <i>Ca_Kabuli_Chr06</i>       | 45978206                       | (T/C)       |
| 11119       | CakSNP11119    | <i>Kabuli</i>    | <i>Ca_Kabuli_Chr06</i>       | 45978263                       | (G/A)       |
| 11120       | CakSNP11120    | <i>Kabuli</i>    | <i>Ca_Kabuli_Chr06</i>       | 46158211                       | (C/T)       |
| 11121       | CakSNP11121    | <i>Kabuli</i>    | <i>Ca_Kabuli_Chr06</i>       | 46734706                       | (C/G)       |
| 11122       | CakSNP11122    | <i>Kabuli</i>    | <i>Ca_Kabuli_Chr06</i>       | 46734725                       | (G/A)       |
| 11123       | CakSNP11123    | <i>Kabuli</i>    | <i>Ca_Kabuli_Chr06</i>       | 46734726                       | (T/C)       |
| 11124       | CakSNP11124    | <i>Kabuli</i>    | <i>Ca_Kabuli_Chr06</i>       | 46765659                       | (G/A)       |
| 11125       | CakSNP11125    | <i>Kabuli</i>    | <i>Ca_Kabuli_Chr06</i>       | 46765661                       | (A/T)       |
| 11126       | CakSNP11126    | <i>Kabuli</i>    | <i>Ca_Kabuli_Chr06</i>       | 46765673                       | (G/A)       |
| 11127       | CakSNP11127    | <i>Kabuli</i>    | <i>Ca_Kabuli_Chr06</i>       | 46765688                       | (A/C)       |
| 11128       | CakSNP11128    | <i>Kabuli</i>    | <i>Ca_Kabuli_Chr06</i>       | 46765725                       | (C/T)       |
| 11129       | CakSNP11129    | <i>Kabuli</i>    | <i>Ca_Kabuli_Chr06</i>       | 46765778                       | (C/A)       |
| 11130       | CakSNP11130    | <i>Kabuli</i>    | <i>Ca_Kabuli_Chr06</i>       | 46765696                       | (C/T)       |
| 11131       | CakSNP11131    | <i>Kabuli</i>    | <i>Ca_Kabuli_Chr06</i>       | 46830497                       | (A/T)       |
| 11132       | CakSNP11132    | <i>Kabuli</i>    | <i>Ca_Kabuli_Chr06</i>       | 46896903                       | (C/T)       |
| 11133       | CakSNP11133    | <i>Kabuli</i>    | <i>Ca_Kabuli_Chr06</i>       | 46896910                       | (A/C)       |
| 11134       | CakSNP11134    | <i>Kabuli</i>    | <i>Ca_Kabuli_Chr06</i>       | 46898225                       | (A/C)       |
| 11135       | CakSNP11135    | <i>Kabuli</i>    | <i>Ca_Kabuli_Chr06</i>       | 46898305                       | (T/G)       |
| 11136       | CakSNP11136    | <i>Kabuli</i>    | <i>Ca_Kabuli_Chr06</i>       | 46898316                       | (T/G)       |
| 11137       | CakSNP11137    | <i>Kabuli</i>    | <i>Ca_Kabuli_Chr06</i>       | 46898317                       | (C/T)       |
| 11138       | CakSNP11138    | <i>Kabuli</i>    | <i>Ca_Kabuli_Chr06</i>       | 46898363                       | (C/T)       |
| 11139       | CakSNP11139    | <i>Kabuli</i>    | <i>Ca_Kabuli_Chr06</i>       | 46898329                       | (T/A)       |
| 11140       | CakSNP11140    | <i>Kabuli</i>    | <i>Ca_Kabuli_Chr06</i>       | 46898747                       | (G/A)       |
| 11141       | CakSNP11141    | <i>Kabuli</i>    | <i>Ca_Kabuli_Chr06</i>       | 46898743                       | (A/G)       |
| 11142       | CakSNP11142    | <i>Kabuli</i>    | <i>Ca_Kabuli_Chr06</i>       | 46899229                       | (G/A)       |
| 11143       | CakSNP11143    | <i>Kabuli</i>    | <i>Ca_Kabuli_Chr06</i>       | 46979240                       | (C/T)       |
| 11144       | CakSNP11144    | <i>Kabuli</i>    | <i>Ca_Kabuli_Chr06</i>       | 46979267                       | (C/A)       |
| 11145       | CakSNP11145    | <i>Kabuli</i>    | <i>Ca_Kabuli_Chr06</i>       | 46998948                       | (G/A)       |
| 11146       | CakSNP11146    | <i>Kabuli</i>    | <i>Ca_Kabuli_Chr06</i>       | 46999012                       | (C/T)       |
| 11147       | CakSNP11147    | <i>Kabuli</i>    | <i>Ca_Kabuli_Chr06</i>       | 47104478                       | (T/G)       |
| 11148       | CakSNP11148    | <i>Kabuli</i>    | <i>Ca_Kabuli_Chr06</i>       | 47104505                       | (C/T)       |
| 11149       | CakSNP11149    | <i>Kabuli</i>    | <i>Ca_Kabuli_Chr06</i>       | 47106174                       | (A/G)       |
| 11150       | CakSNP11150    | <i>Kabuli</i>    | <i>Ca_Kabuli_Chr06</i>       | 47106238                       | (C/A)       |
| 11151       | CakSNP11151    | <i>Kabuli</i>    | <i>Ca_Kabuli_Chr06</i>       | 47232630                       | (C/T)       |
| 11152       | CakSNP11152    | <i>Kabuli</i>    | <i>Ca_Kabuli_Chr06</i>       | 47232631                       | (C/G)       |

| <b>S.N.</b> | <b>SNP IDs</b> | <b>Cultivars</b> | <b>Chromosomes/scaffolds</b> | <b>Physical positions (bp)</b> | <b>SNPs</b> |
|-------------|----------------|------------------|------------------------------|--------------------------------|-------------|
| 11153       | CakSNP11153    | <i>Kabuli</i>    | <i>Ca_Kabuli_Chr06</i>       | 47232685                       | (T/A)       |
| 11154       | CakSNP11154    | <i>Kabuli</i>    | <i>Ca_Kabuli_Chr06</i>       | 47440468                       | (A/T)       |
| 11155       | CakSNP11155    | <i>Kabuli</i>    | <i>Ca_Kabuli_Chr06</i>       | 47575655                       | (G/T)       |
| 11156       | CakSNP11156    | <i>Kabuli</i>    | <i>Ca_Kabuli_Chr06</i>       | 47575659                       | (C/G)       |
| 11157       | CakSNP11157    | <i>Kabuli</i>    | <i>Ca_Kabuli_Chr06</i>       | 47906683                       | (G/A)       |
| 11158       | CakSNP11158    | <i>Kabuli</i>    | <i>Ca_Kabuli_Chr06</i>       | 47906680                       | (C/T)       |
| 11159       | CakSNP11159    | <i>Kabuli</i>    | <i>Ca_Kabuli_Chr06</i>       | 47906629                       | (T/G)       |
| 11160       | CakSNP11160    | <i>Kabuli</i>    | <i>Ca_Kabuli_Chr06</i>       | 48088550                       | (G/A)       |
| 11161       | CakSNP11161    | <i>Kabuli</i>    | <i>Ca_Kabuli_Chr06</i>       | 48088592                       | (C/T)       |
| 11162       | CakSNP11162    | <i>Kabuli</i>    | <i>Ca_Kabuli_Chr06</i>       | 48255392                       | (G/A)       |
| 11163       | CakSNP11163    | <i>Kabuli</i>    | <i>Ca_Kabuli_Chr06</i>       | 48255538                       | (A/G)       |
| 11164       | CakSNP11164    | <i>Kabuli</i>    | <i>Ca_Kabuli_Chr06</i>       | 48255558                       | (C/T)       |
| 11165       | CakSNP11165    | <i>Kabuli</i>    | <i>Ca_Kabuli_Chr06</i>       | 48255559                       | (A/G)       |
| 11166       | CakSNP11166    | <i>Kabuli</i>    | <i>Ca_Kabuli_Chr06</i>       | 48255568                       | (A/G)       |
| 11167       | CakSNP11167    | <i>Kabuli</i>    | <i>Ca_Kabuli_Chr06</i>       | 48255599                       | (C/A)       |
| 11168       | CakSNP11168    | <i>Kabuli</i>    | <i>Ca_Kabuli_Chr06</i>       | 48314052                       | (T/A)       |
| 11169       | CakSNP11169    | <i>Kabuli</i>    | <i>Ca_Kabuli_Chr06</i>       | 48314788                       | (T/C)       |
| 11170       | CakSNP11170    | <i>Kabuli</i>    | <i>Ca_Kabuli_Chr06</i>       | 48315194                       | (C/A)       |
| 11171       | CakSNP11171    | <i>Kabuli</i>    | <i>Ca_Kabuli_Chr06</i>       | 48315340                       | (C/A)       |
| 11172       | CakSNP11172    | <i>Kabuli</i>    | <i>Ca_Kabuli_Chr06</i>       | 48315343                       | (G/T)       |
| 11173       | CakSNP11173    | <i>Kabuli</i>    | <i>Ca_Kabuli_Chr06</i>       | 48810611                       | (A/T)       |
| 11174       | CakSNP11174    | <i>Kabuli</i>    | <i>Ca_Kabuli_Chr06</i>       | 48810608                       | (C/T)       |
| 11175       | CakSNP11175    | <i>Kabuli</i>    | <i>Ca_Kabuli_Chr06</i>       | 48864622                       | (T/C)       |
| 11176       | CakSNP11176    | <i>Kabuli</i>    | <i>Ca_Kabuli_Chr06</i>       | 48864625                       | (G/A)       |
| 11177       | CakSNP11177    | <i>Kabuli</i>    | <i>Ca_Kabuli_Chr06</i>       | 48864639                       | (A/C)       |
| 11178       | CakSNP11178    | <i>Kabuli</i>    | <i>Ca_Kabuli_Chr06</i>       | 48864699                       | (T/C)       |
| 11179       | CakSNP11179    | <i>Kabuli</i>    | <i>Ca_Kabuli_Chr06</i>       | 48869462                       | (C/T)       |
| 11180       | CakSNP11180    | <i>Kabuli</i>    | <i>Ca_Kabuli_Chr06</i>       | 48869473                       | (C/A)       |
| 11181       | CakSNP11181    | <i>Kabuli</i>    | <i>Ca_Kabuli_Chr06</i>       | 48869484                       | (G/A)       |
| 11182       | CakSNP11182    | <i>Kabuli</i>    | <i>Ca_Kabuli_Chr06</i>       | 48869577                       | (C/T)       |
| 11183       | CakSNP11183    | <i>Kabuli</i>    | <i>Ca_Kabuli_Chr06</i>       | 48869539                       | (A/G)       |
| 11184       | CakSNP11184    | <i>Kabuli</i>    | <i>Ca_Kabuli_Chr06</i>       | 48869529                       | (T/C)       |
| 11185       | CakSNP11185    | <i>Kabuli</i>    | <i>Ca_Kabuli_Chr06</i>       | 48869512                       | (G/C)       |
| 11186       | CakSNP11186    | <i>Kabuli</i>    | <i>Ca_Kabuli_Chr06</i>       | 48940386                       | (A/C)       |
| 11187       | CakSNP11187    | <i>Kabuli</i>    | <i>Ca_Kabuli_Chr06</i>       | 49044772                       | (A/C)       |
| 11188       | CakSNP11188    | <i>Kabuli</i>    | <i>Ca_Kabuli_Chr06</i>       | 49044785                       | (C/T)       |
| 11189       | CakSNP11189    | <i>Kabuli</i>    | <i>Ca_Kabuli_Chr06</i>       | 49044794                       | (T/A)       |
| 11190       | CakSNP11190    | <i>Kabuli</i>    | <i>Ca_Kabuli_Chr06</i>       | 49044802                       | (T/C)       |
| 11191       | CakSNP11191    | <i>Kabuli</i>    | <i>Ca_Kabuli_Chr06</i>       | 49044805                       | (A/G)       |



| <b>S.N.</b> | <b>SNP IDs</b> | <b>Cultivars</b> | <b>Chromosomes/scaffolds</b> | <b>Physical positions (bp)</b> | <b>SNPs</b> |
|-------------|----------------|------------------|------------------------------|--------------------------------|-------------|
| 11192       | CakSNP11192    | <i>Kabuli</i>    | <i>Ca_Kabuli_Chr06</i>       | 49044814                       | (G/T)       |
| 11193       | CakSNP11193    | <i>Kabuli</i>    | <i>Ca_Kabuli_Chr06</i>       | 49044824                       | (C/T)       |
| 11194       | CakSNP11194    | <i>Kabuli</i>    | <i>Ca_Kabuli_Chr06</i>       | 49044839                       | (T/A)       |
| 11195       | CakSNP11195    | <i>Kabuli</i>    | <i>Ca_Kabuli_Chr06</i>       | 49044850                       | (A/C)       |
| 11196       | CakSNP11196    | <i>Kabuli</i>    | <i>Ca_Kabuli_Chr06</i>       | 49044847                       | (G/A)       |
| 11197       | CakSNP11197    | <i>Kabuli</i>    | <i>Ca_Kabuli_Chr06</i>       | 49044842                       | (G/A)       |
| 11198       | CakSNP11198    | <i>Kabuli</i>    | <i>Ca_Kabuli_Chr06</i>       | 49044838                       | (C/A)       |
| 11199       | CakSNP11199    | <i>Kabuli</i>    | <i>Ca_Kabuli_Chr06</i>       | 49044835                       | (C/A)       |
| 11200       | CakSNP11200    | <i>Kabuli</i>    | <i>Ca_Kabuli_Chr06</i>       | 49044826                       | (G/A)       |
| 11201       | CakSNP11201    | <i>Kabuli</i>    | <i>Ca_Kabuli_Chr06</i>       | 49044821                       | (C/G)       |
| 11202       | CakSNP11202    | <i>Kabuli</i>    | <i>Ca_Kabuli_Chr06</i>       | 49044810                       | (G/A)       |
| 11203       | CakSNP11203    | <i>Kabuli</i>    | <i>Ca_Kabuli_Chr06</i>       | 49044808                       | (C/T)       |
| 11204       | CakSNP11204    | <i>Kabuli</i>    | <i>Ca_Kabuli_Chr06</i>       | 49044788                       | (T/A)       |
| 11205       | CakSNP11205    | <i>Kabuli</i>    | <i>Ca_Kabuli_Chr06</i>       | 49044780                       | (G/A)       |
| 11206       | CakSNP11206    | <i>Kabuli</i>    | <i>Ca_Kabuli_Chr06</i>       | 49044915                       | (A/G)       |
| 11207       | CakSNP11207    | <i>Kabuli</i>    | <i>Ca_Kabuli_Chr06</i>       | 49044928                       | (C/A)       |
| 11208       | CakSNP11208    | <i>Kabuli</i>    | <i>Ca_Kabuli_Chr06</i>       | 49044936                       | (C/T)       |
| 11209       | CakSNP11209    | <i>Kabuli</i>    | <i>Ca_Kabuli_Chr06</i>       | 49044937                       | (A/G)       |
| 11210       | CakSNP11210    | <i>Kabuli</i>    | <i>Ca_Kabuli_Chr06</i>       | 49044944                       | (A/G)       |
| 11211       | CakSNP11211    | <i>Kabuli</i>    | <i>Ca_Kabuli_Chr06</i>       | 49101829                       | (G/C)       |
| 11212       | CakSNP11212    | <i>Kabuli</i>    | <i>Ca_Kabuli_Chr06</i>       | 49167341                       | (T/G)       |
| 11213       | CakSNP11213    | <i>Kabuli</i>    | <i>Ca_Kabuli_Chr06</i>       | 49222291                       | (G/A)       |
| 11214       | CakSNP11214    | <i>Kabuli</i>    | <i>Ca_Kabuli_Chr06</i>       | 49222290                       | (C/T)       |
| 11215       | CakSNP11215    | <i>Kabuli</i>    | <i>Ca_Kabuli_Chr06</i>       | 49222275                       | (A/C)       |
| 11216       | CakSNP11216    | <i>Kabuli</i>    | <i>Ca_Kabuli_Chr06</i>       | 49222268                       | (T/A)       |
| 11217       | CakSNP11217    | <i>Kabuli</i>    | <i>Ca_Kabuli_Chr06</i>       | 49222251                       | (G/A)       |
| 11218       | CakSNP11218    | <i>Kabuli</i>    | <i>Ca_Kabuli_Chr06</i>       | 49222235                       | (G/C)       |
| 11219       | CakSNP11219    | <i>Kabuli</i>    | <i>Ca_Kabuli_Chr06</i>       | 49377275                       | (G/A)       |
| 11220       | CakSNP11220    | <i>Kabuli</i>    | <i>Ca_Kabuli_Chr06</i>       | 49403430                       | (G/C)       |
| 11221       | CakSNP11221    | <i>Kabuli</i>    | <i>Ca_Kabuli_Chr06</i>       | 49406604                       | (G/A)       |
| 11222       | CakSNP11222    | <i>Kabuli</i>    | <i>Ca_Kabuli_Chr06</i>       | 49406599                       | (C/A)       |
| 11223       | CakSNP11223    | <i>Kabuli</i>    | <i>Ca_Kabuli_Chr06</i>       | 49466066                       | (A/G)       |
| 11224       | CakSNP11224    | <i>Kabuli</i>    | <i>Ca_Kabuli_Chr06</i>       | 49475716                       | (G/A)       |
| 11225       | CakSNP11225    | <i>Kabuli</i>    | <i>Ca_Kabuli_Chr06</i>       | 49475715                       | (A/G)       |
| 11226       | CakSNP11226    | <i>Kabuli</i>    | <i>Ca_Kabuli_Chr06</i>       | 49524179                       | (A/T)       |
| 11227       | CakSNP11227    | <i>Kabuli</i>    | <i>Ca_Kabuli_Chr06</i>       | 49565934                       | (C/T)       |
| 11228       | CakSNP11228    | <i>Kabuli</i>    | <i>Ca_Kabuli_Chr06</i>       | 49664132                       | (C/G)       |
| 11229       | CakSNP11229    | <i>Kabuli</i>    | <i>Ca_Kabuli_Chr06</i>       | 49724448                       | (C/T)       |
| 11230       | CakSNP11230    | <i>Kabuli</i>    | <i>Ca_Kabuli_Chr06</i>       | 49724515                       | (C/T)       |

| <b>S.N.</b> | <b>SNP IDs</b> | <b>Cultivars</b> | <b>Chromosomes/scaffolds</b> | <b>Physical positions (bp)</b> | <b>SNPs</b> |
|-------------|----------------|------------------|------------------------------|--------------------------------|-------------|
| 11231       | CakSNP11231    | <i>Kabuli</i>    | <i>Ca_Kabuli_Chr06</i>       | 49726734                       | (C/G)       |
| 11232       | CakSNP11232    | <i>Kabuli</i>    | <i>Ca_Kabuli_Chr06</i>       | 49726732                       | (T/C)       |
| 11233       | CakSNP11233    | <i>Kabuli</i>    | <i>Ca_Kabuli_Chr06</i>       | 49726729                       | (G/A)       |
| 11234       | CakSNP11234    | <i>Kabuli</i>    | <i>Ca_Kabuli_Chr06</i>       | 49726711                       | (C/T)       |
| 11235       | CakSNP11235    | <i>Kabuli</i>    | <i>Ca_Kabuli_Chr06</i>       | 49726723                       | (G/A)       |
| 11236       | CakSNP11236    | <i>Kabuli</i>    | <i>Ca_Kabuli_Chr06</i>       | 49830299                       | (A/G)       |
| 11237       | CakSNP11237    | <i>Kabuli</i>    | <i>Ca_Kabuli_Chr06</i>       | 49830384                       | (G/A)       |
| 11238       | CakSNP11238    | <i>Kabuli</i>    | <i>Ca_Kabuli_Chr06</i>       | 49833934                       | (C/T)       |
| 11239       | CakSNP11239    | <i>Kabuli</i>    | <i>Ca_Kabuli_Chr06</i>       | 49843667                       | (G/A)       |
| 11240       | CakSNP11240    | <i>Kabuli</i>    | <i>Ca_Kabuli_Chr06</i>       | 49846257                       | (A/T)       |
| 11241       | CakSNP11241    | <i>Kabuli</i>    | <i>Ca_Kabuli_Chr06</i>       | 49846303                       | (T/G)       |
| 11242       | CakSNP11242    | <i>Kabuli</i>    | <i>Ca_Kabuli_Chr06</i>       | 49931821                       | (C/T)       |
| 11243       | CakSNP11243    | <i>Kabuli</i>    | <i>Ca_Kabuli_Chr06</i>       | 49931879                       | (T/C)       |
| 11244       | CakSNP11244    | <i>Kabuli</i>    | <i>Ca_Kabuli_Chr06</i>       | 49942397                       | (A/G)       |
| 11245       | CakSNP11245    | <i>Kabuli</i>    | <i>Ca_Kabuli_Chr06</i>       | 50086781                       | (A/G)       |
| 11246       | CakSNP11246    | <i>Kabuli</i>    | <i>Ca_Kabuli_Chr06</i>       | 50152053                       | (C/T)       |
| 11247       | CakSNP11247    | <i>Kabuli</i>    | <i>Ca_Kabuli_Chr06</i>       | 50152129                       | (C/T)       |
| 11248       | CakSNP11248    | <i>Kabuli</i>    | <i>Ca_Kabuli_Chr06</i>       | 50152124                       | (C/T)       |
| 11249       | CakSNP11249    | <i>Kabuli</i>    | <i>Ca_Kabuli_Chr06</i>       | 50152119                       | (T/C)       |
| 11250       | CakSNP11250    | <i>Kabuli</i>    | <i>Ca_Kabuli_Chr06</i>       | 50152083                       | (C/T)       |
| 11251       | CakSNP11251    | <i>Kabuli</i>    | <i>Ca_Kabuli_Chr06</i>       | 50217734                       | (G/A)       |
| 11252       | CakSNP11252    | <i>Kabuli</i>    | <i>Ca_Kabuli_Chr06</i>       | 50356239                       | (A/G)       |
| 11253       | CakSNP11253    | <i>Kabuli</i>    | <i>Ca_Kabuli_Chr06</i>       | 50356229                       | (C/T)       |
| 11254       | CakSNP11254    | <i>Kabuli</i>    | <i>Ca_Kabuli_Chr06</i>       | 50356222                       | (C/A)       |
| 11255       | CakSNP11255    | <i>Kabuli</i>    | <i>Ca_Kabuli_Chr06</i>       | 50356217                       | (T/C)       |
| 11256       | CakSNP11256    | <i>Kabuli</i>    | <i>Ca_Kabuli_Chr06</i>       | 50356206                       | (G/T)       |
| 11257       | CakSNP11257    | <i>Kabuli</i>    | <i>Ca_Kabuli_Chr06</i>       | 50356201                       | (T/C)       |
| 11258       | CakSNP11258    | <i>Kabuli</i>    | <i>Ca_Kabuli_Chr06</i>       | 50382452                       | (C/T)       |
| 11259       | CakSNP11259    | <i>Kabuli</i>    | <i>Ca_Kabuli_Chr06</i>       | 50384101                       | (A/C)       |
| 11260       | CakSNP11260    | <i>Kabuli</i>    | <i>Ca_Kabuli_Chr06</i>       | 50390752                       | (A/G)       |
| 11261       | CakSNP11261    | <i>Kabuli</i>    | <i>Ca_Kabuli_Chr06</i>       | 50476721                       | (T/C)       |
| 11262       | CakSNP11262    | <i>Kabuli</i>    | <i>Ca_Kabuli_Chr06</i>       | 50476775                       | (G/A)       |
| 11263       | CakSNP11263    | <i>Kabuli</i>    | <i>Ca_Kabuli_Chr06</i>       | 50477672                       | (A/C)       |
| 11264       | CakSNP11264    | <i>Kabuli</i>    | <i>Ca_Kabuli_Chr06</i>       | 50581295                       | (T/G)       |
| 11265       | CakSNP11265    | <i>Kabuli</i>    | <i>Ca_Kabuli_Chr06</i>       | 50617926                       | (G/C)       |
| 11266       | CakSNP11266    | <i>Kabuli</i>    | <i>Ca_Kabuli_Chr06</i>       | 50617932                       | (G/A)       |
| 11267       | CakSNP11267    | <i>Kabuli</i>    | <i>Ca_Kabuli_Chr06</i>       | 50723595                       | (T/C)       |
| 11268       | CakSNP11268    | <i>Kabuli</i>    | <i>Ca_Kabuli_Chr06</i>       | 50723630                       | (C/T)       |
| 11269       | CakSNP11269    | <i>Kabuli</i>    | <i>Ca_Kabuli_Chr06</i>       | 50723916                       | (T/C)       |

| <b>S.N.</b> | <b>SNP IDs</b> | <b>Cultivars</b> | <b>Chromosomes/scaffolds</b> | <b>Physical positions (bp)</b> | <b>SNPs</b> |
|-------------|----------------|------------------|------------------------------|--------------------------------|-------------|
| 11270       | CakSNP11270    | <i>Kabuli</i>    | <i>Ca_Kabuli_Chr06</i>       | 50723950                       | (A/G)       |
| 11271       | CakSNP11271    | <i>Kabuli</i>    | <i>Ca_Kabuli_Chr06</i>       | 50723980                       | (A/G)       |
| 11272       | CakSNP11272    | <i>Kabuli</i>    | <i>Ca_Kabuli_Chr06</i>       | 50723988                       | (C/A)       |
| 11273       | CakSNP11273    | <i>Kabuli</i>    | <i>Ca_Kabuli_Chr06</i>       | 51157961                       | (C/T)       |
| 11274       | CakSNP11274    | <i>Kabuli</i>    | <i>Ca_Kabuli_Chr06</i>       | 51157939                       | (A/C)       |
| 11275       | CakSNP11275    | <i>Kabuli</i>    | <i>Ca_Kabuli_Chr06</i>       | 51162065                       | (T/C)       |
| 11276       | CakSNP11276    | <i>Kabuli</i>    | <i>Ca_Kabuli_Chr06</i>       | 51281235                       | (G/A)       |
| 11277       | CakSNP11277    | <i>Kabuli</i>    | <i>Ca_Kabuli_Chr06</i>       | 51281178                       | (C/G)       |
| 11278       | CakSNP11278    | <i>Kabuli</i>    | <i>Ca_Kabuli_Chr06</i>       | 51345460                       | (G/C)       |
| 11279       | CakSNP11279    | <i>Kabuli</i>    | <i>Ca_Kabuli_Chr06</i>       | 51392609                       | (T/C)       |
| 11280       | CakSNP11280    | <i>Kabuli</i>    | <i>Ca_Kabuli_Chr06</i>       | 51471573                       | (T/C)       |
| 11281       | CakSNP11281    | <i>Kabuli</i>    | <i>Ca_Kabuli_Chr06</i>       | 52007211                       | (T/C)       |
| 11282       | CakSNP11282    | <i>Kabuli</i>    | <i>Ca_Kabuli_Chr06</i>       | 52007217                       | (G/A)       |
| 11283       | CakSNP11283    | <i>Kabuli</i>    | <i>Ca_Kabuli_Chr06</i>       | 52007471                       | (C/T)       |
| 11284       | CakSNP11284    | <i>Kabuli</i>    | <i>Ca_Kabuli_Chr06</i>       | 52007464                       | (C/G)       |
| 11285       | CakSNP11285    | <i>Kabuli</i>    | <i>Ca_Kabuli_Chr06</i>       | 52007440                       | (C/T)       |
| 11286       | CakSNP11286    | <i>Kabuli</i>    | <i>Ca_Kabuli_Chr06</i>       | 52033279                       | (G/A)       |
| 11287       | CakSNP11287    | <i>Kabuli</i>    | <i>Ca_Kabuli_Chr06</i>       | 52033244                       | (A/T)       |
| 11288       | CakSNP11288    | <i>Kabuli</i>    | <i>Ca_Kabuli_Chr06</i>       | 52059750                       | (A/G)       |
| 11289       | CakSNP11289    | <i>Kabuli</i>    | <i>Ca_Kabuli_Chr06</i>       | 52065393                       | (C/A)       |
| 11290       | CakSNP11290    | <i>Kabuli</i>    | <i>Ca_Kabuli_Chr06</i>       | 52065527                       | (T/A)       |
| 11291       | CakSNP11291    | <i>Kabuli</i>    | <i>Ca_Kabuli_Chr06</i>       | 52164571                       | (C/A)       |
| 11292       | CakSNP11292    | <i>Kabuli</i>    | <i>Ca_Kabuli_Chr06</i>       | 52227277                       | (T/C)       |
| 11293       | CakSNP11293    | <i>Kabuli</i>    | <i>Ca_Kabuli_Chr06</i>       | 52304094                       | (C/T)       |
| 11294       | CakSNP11294    | <i>Kabuli</i>    | <i>Ca_Kabuli_Chr06</i>       | 52304112                       | (A/G)       |
| 11295       | CakSNP11295    | <i>Kabuli</i>    | <i>Ca_Kabuli_Chr06</i>       | 52363121                       | (C/T)       |
| 11296       | CakSNP11296    | <i>Kabuli</i>    | <i>Ca_Kabuli_Chr06</i>       | 52416366                       | (T/A)       |
| 11297       | CakSNP11297    | <i>Kabuli</i>    | <i>Ca_Kabuli_Chr06</i>       | 52417684                       | (C/T)       |
| 11298       | CakSNP11298    | <i>Kabuli</i>    | <i>Ca_Kabuli_Chr06</i>       | 52417717                       | (T/G)       |
| 11299       | CakSNP11299    | <i>Kabuli</i>    | <i>Ca_Kabuli_Chr06</i>       | 52417720                       | (A/T)       |
| 11300       | CakSNP11300    | <i>Kabuli</i>    | <i>Ca_Kabuli_Chr06</i>       | 52417736                       | (T/A)       |
| 11301       | CakSNP11301    | <i>Kabuli</i>    | <i>Ca_Kabuli_Chr06</i>       | 52417747                       | (G/T)       |
| 11302       | CakSNP11302    | <i>Kabuli</i>    | <i>Ca_Kabuli_Chr06</i>       | 52567474                       | (A/C)       |
| 11303       | CakSNP11303    | <i>Kabuli</i>    | <i>Ca_Kabuli_Chr06</i>       | 52596602                       | (T/A)       |
| 11304       | CakSNP11304    | <i>Kabuli</i>    | <i>Ca_Kabuli_Chr06</i>       | 52596601                       | (A/T)       |
| 11305       | CakSNP11305    | <i>Kabuli</i>    | <i>Ca_Kabuli_Chr06</i>       | 52858359                       | (A/G)       |
| 11306       | CakSNP11306    | <i>Kabuli</i>    | <i>Ca_Kabuli_Chr06</i>       | 52993231                       | (A/G)       |
| 11307       | CakSNP11307    | <i>Kabuli</i>    | <i>Ca_Kabuli_Chr06</i>       | 53068176                       | (C/T)       |
| 11308       | CakSNP11308    | <i>Kabuli</i>    | <i>Ca_Kabuli_Chr06</i>       | 53068201                       | (G/T)       |

| <b>S.N.</b> | <b>SNP IDs</b> | <b>Cultivars</b> | <b>Chromosomes/scaffolds</b> | <b>Physical positions (bp)</b> | <b>SNPs</b> |
|-------------|----------------|------------------|------------------------------|--------------------------------|-------------|
| 11309       | CakSNP11309    | <i>Kabuli</i>    | <i>Ca_Kabuli_Chr06</i>       | 53097833                       | (G/C)       |
| 11310       | CakSNP11310    | <i>Kabuli</i>    | <i>Ca_Kabuli_Chr06</i>       | 53097803                       | (A/G)       |
| 11311       | CakSNP11311    | <i>Kabuli</i>    | <i>Ca_Kabuli_Chr06</i>       | 53097766                       | (G/A)       |
| 11312       | CakSNP11312    | <i>Kabuli</i>    | <i>Ca_Kabuli_Chr06</i>       | 53124182                       | (G/T)       |
| 11313       | CakSNP11313    | <i>Kabuli</i>    | <i>Ca_Kabuli_Chr06</i>       | 53168715                       | (T/G)       |
| 11314       | CakSNP11314    | <i>Kabuli</i>    | <i>Ca_Kabuli_Chr06</i>       | 53348993                       | (C/A)       |
| 11315       | CakSNP11315    | <i>Kabuli</i>    | <i>Ca_Kabuli_Chr06</i>       | 53349034                       | (G/A)       |
| 11316       | CakSNP11316    | <i>Kabuli</i>    | <i>Ca_Kabuli_Chr06</i>       | 53390065                       | (A/G)       |
| 11317       | CakSNP11317    | <i>Kabuli</i>    | <i>Ca_Kabuli_Chr06</i>       | 53461929                       | (C/A)       |
| 11318       | CakSNP11318    | <i>Kabuli</i>    | <i>Ca_Kabuli_Chr06</i>       | 53461883                       | (A/G)       |
| 11319       | CakSNP11319    | <i>Kabuli</i>    | <i>Ca_Kabuli_Chr06</i>       | 53541031                       | (G/A)       |
| 11320       | CakSNP11320    | <i>Kabuli</i>    | <i>Ca_Kabuli_Chr06</i>       | 53541094                       | (C/G)       |
| 11321       | CakSNP11321    | <i>Kabuli</i>    | <i>Ca_Kabuli_Chr06</i>       | 53541111                       | (T/G)       |
| 11322       | CakSNP11322    | <i>Kabuli</i>    | <i>Ca_Kabuli_Chr06</i>       | 53551878                       | (C/A)       |
| 11323       | CakSNP11323    | <i>Kabuli</i>    | <i>Ca_Kabuli_Chr06</i>       | 53558430                       | (A/C)       |
| 11324       | CakSNP11324    | <i>Kabuli</i>    | <i>Ca_Kabuli_Chr06</i>       | 53566496                       | (G/A)       |
| 11325       | CakSNP11325    | <i>Kabuli</i>    | <i>Ca_Kabuli_Chr06</i>       | 53566506                       | (C/T)       |
| 11326       | CakSNP11326    | <i>Kabuli</i>    | <i>Ca_Kabuli_Chr06</i>       | 53625264                       | (A/C)       |
| 11327       | CakSNP11327    | <i>Kabuli</i>    | <i>Ca_Kabuli_Chr06</i>       | 53683753                       | (T/C)       |
| 11328       | CakSNP11328    | <i>Kabuli</i>    | <i>Ca_Kabuli_Chr06</i>       | 53683891                       | (C/A)       |
| 11329       | CakSNP11329    | <i>Kabuli</i>    | <i>Ca_Kabuli_Chr06</i>       | 53683885                       | (C/T)       |
| 11330       | CakSNP11330    | <i>Kabuli</i>    | <i>Ca_Kabuli_Chr06</i>       | 53683879                       | (C/T)       |
| 11331       | CakSNP11331    | <i>Kabuli</i>    | <i>Ca_Kabuli_Chr06</i>       | 53683876                       | (C/T)       |
| 11332       | CakSNP11332    | <i>Kabuli</i>    | <i>Ca_Kabuli_Chr06</i>       | 53692784                       | (G/A)       |
| 11333       | CakSNP11333    | <i>Kabuli</i>    | <i>Ca_Kabuli_Chr06</i>       | 53769044                       | (A/C)       |
| 11334       | CakSNP11334    | <i>Kabuli</i>    | <i>Ca_Kabuli_Chr06</i>       | 53769160                       | (C/T)       |
| 11335       | CakSNP11335    | <i>Kabuli</i>    | <i>Ca_Kabuli_Chr06</i>       | 53769240                       | (T/A)       |
| 11336       | CakSNP11336    | <i>Kabuli</i>    | <i>Ca_Kabuli_Chr06</i>       | 53769241                       | (A/T)       |
| 11337       | CakSNP11337    | <i>Kabuli</i>    | <i>Ca_Kabuli_Chr06</i>       | 54091997                       | (A/C)       |
| 11338       | CakSNP11338    | <i>Kabuli</i>    | <i>Ca_Kabuli_Chr06</i>       | 54151902                       | (T/G)       |
| 11339       | CakSNP11339    | <i>Kabuli</i>    | <i>Ca_Kabuli_Chr06</i>       | 54151966                       | (G/C)       |
| 11340       | CakSNP11340    | <i>Kabuli</i>    | <i>Ca_Kabuli_Chr06</i>       | 54151969                       | (T/G)       |
| 11341       | CakSNP11341    | <i>Kabuli</i>    | <i>Ca_Kabuli_Chr06</i>       | 54203356                       | (G/A)       |
| 11342       | CakSNP11342    | <i>Kabuli</i>    | <i>Ca_Kabuli_Chr06</i>       | 54203400                       | (C/T)       |
| 11343       | CakSNP11343    | <i>Kabuli</i>    | <i>Ca_Kabuli_Chr06</i>       | 54226451                       | (A/T)       |
| 11344       | CakSNP11344    | <i>Kabuli</i>    | <i>Ca_Kabuli_Chr06</i>       | 54226432                       | (A/C)       |
| 11345       | CakSNP11345    | <i>Kabuli</i>    | <i>Ca_Kabuli_Chr06</i>       | 54229449                       | (G/T)       |
| 11346       | CakSNP11346    | <i>Kabuli</i>    | <i>Ca_Kabuli_Chr06</i>       | 54237764                       | (A/C)       |
| 11347       | CakSNP11347    | <i>Kabuli</i>    | <i>Ca_Kabuli_Chr06</i>       | 54237815                       | (C/T)       |

| <b>S.N.</b> | <b>SNP IDs</b> | <b>Cultivars</b> | <b>Chromosomes/scaffolds</b> | <b>Physical positions (bp)</b> | <b>SNPs</b> |
|-------------|----------------|------------------|------------------------------|--------------------------------|-------------|
| 11348       | CakSNP11348    | <i>Kabuli</i>    | <i>Ca_Kabuli_Chr06</i>       | 54250702                       | (C/T)       |
| 11349       | CakSNP11349    | <i>Kabuli</i>    | <i>Ca_Kabuli_Chr06</i>       | 54368267                       | (G/A)       |
| 11350       | CakSNP11350    | <i>Kabuli</i>    | <i>Ca_Kabuli_Chr06</i>       | 54869636                       | (C/T)       |
| 11351       | CakSNP11351    | <i>Kabuli</i>    | <i>Ca_Kabuli_Chr06</i>       | 54869666                       | (G/A)       |
| 11352       | CakSNP11352    | <i>Kabuli</i>    | <i>Ca_Kabuli_Chr06</i>       | 54997337                       | (A/T)       |
| 11353       | CakSNP11353    | <i>Kabuli</i>    | <i>Ca_Kabuli_Chr06</i>       | 55024071                       | (C/T)       |
| 11354       | CakSNP11354    | <i>Kabuli</i>    | <i>Ca_Kabuli_Chr06</i>       | 55024091                       | (G/A)       |
| 11355       | CakSNP11355    | <i>Kabuli</i>    | <i>Ca_Kabuli_Chr06</i>       | 55024146                       | (C/T)       |
| 11356       | CakSNP11356    | <i>Kabuli</i>    | <i>Ca_Kabuli_Chr06</i>       | 55024140                       | (G/A)       |
| 11357       | CakSNP11357    | <i>Kabuli</i>    | <i>Ca_Kabuli_Chr06</i>       | 55024130                       | (T/A)       |
| 11358       | CakSNP11358    | <i>Kabuli</i>    | <i>Ca_Kabuli_Chr06</i>       | 55024112                       | (C/G)       |
| 11359       | CakSNP11359    | <i>Kabuli</i>    | <i>Ca_Kabuli_Chr06</i>       | 55024093                       | (G/C)       |
| 11360       | CakSNP11360    | <i>Kabuli</i>    | <i>Ca_Kabuli_Chr06</i>       | 55024108                       | (C/T)       |
| 11361       | CakSNP11361    | <i>Kabuli</i>    | <i>Ca_Kabuli_Chr06</i>       | 55024136                       | (C/T)       |
| 11362       | CakSNP11362    | <i>Kabuli</i>    | <i>Ca_Kabuli_Chr06</i>       | 55024159                       | (T/A)       |
| 11363       | CakSNP11363    | <i>Kabuli</i>    | <i>Ca_Kabuli_Chr06</i>       | 55024198                       | (T/G)       |
| 11364       | CakSNP11364    | <i>Kabuli</i>    | <i>Ca_Kabuli_Chr06</i>       | 55028980                       | (G/A)       |
| 11365       | CakSNP11365    | <i>Kabuli</i>    | <i>Ca_Kabuli_Chr06</i>       | 55074979                       | (T/A)       |
| 11366       | CakSNP11366    | <i>Kabuli</i>    | <i>Ca_Kabuli_Chr06</i>       | 55083311                       | (T/A)       |
| 11367       | CakSNP11367    | <i>Kabuli</i>    | <i>Ca_Kabuli_Chr06</i>       | 55083721                       | (T/A)       |
| 11368       | CakSNP11368    | <i>Kabuli</i>    | <i>Ca_Kabuli_Chr06</i>       | 55180211                       | (A/G)       |
| 11369       | CakSNP11369    | <i>Kabuli</i>    | <i>Ca_Kabuli_Chr06</i>       | 55332515                       | (G/A)       |
| 11370       | CakSNP11370    | <i>Kabuli</i>    | <i>Ca_Kabuli_Chr06</i>       | 55914455                       | (T/C)       |
| 11371       | CakSNP11371    | <i>Kabuli</i>    | <i>Ca_Kabuli_Chr06</i>       | 55914451                       | (A/G)       |
| 11372       | CakSNP11372    | <i>Kabuli</i>    | <i>Ca_Kabuli_Chr06</i>       | 55914443                       | (T/C)       |
| 11373       | CakSNP11373    | <i>Kabuli</i>    | <i>Ca_Kabuli_Chr06</i>       | 55914434                       | (C/T)       |
| 11374       | CakSNP11374    | <i>Kabuli</i>    | <i>Ca_Kabuli_Chr06</i>       | 55914431                       | (G/A)       |
| 11375       | CakSNP11375    | <i>Kabuli</i>    | <i>Ca_Kabuli_Chr06</i>       | 55922843                       | (T/A)       |
| 11376       | CakSNP11376    | <i>Kabuli</i>    | <i>Ca_Kabuli_Chr06</i>       | 55922850                       | (C/T)       |
| 11377       | CakSNP11377    | <i>Kabuli</i>    | <i>Ca_Kabuli_Chr06</i>       | 55942105                       | (A/G)       |
| 11378       | CakSNP11378    | <i>Kabuli</i>    | <i>Ca_Kabuli_Chr06</i>       | 55953320                       | (T/A)       |
| 11379       | CakSNP11379    | <i>Kabuli</i>    | <i>Ca_Kabuli_Chr06</i>       | 55953327                       | (C/T)       |
| 11380       | CakSNP11380    | <i>Kabuli</i>    | <i>Ca_Kabuli_Chr06</i>       | 56025902                       | (A/G)       |
| 11381       | CakSNP11381    | <i>Kabuli</i>    | <i>Ca_Kabuli_Chr06</i>       | 56025888                       | (G/A)       |
| 11382       | CakSNP11382    | <i>Kabuli</i>    | <i>Ca_Kabuli_Chr06</i>       | 56025884                       | (A/G)       |
| 11383       | CakSNP11383    | <i>Kabuli</i>    | <i>Ca_Kabuli_Chr06</i>       | 56029491                       | (T/A)       |
| 11384       | CakSNP11384    | <i>Kabuli</i>    | <i>Ca_Kabuli_Chr06</i>       | 56029544                       | (A/T)       |
| 11385       | CakSNP11385    | <i>Kabuli</i>    | <i>Ca_Kabuli_Chr06</i>       | 56029549                       | (C/T)       |
| 11386       | CakSNP11386    | <i>Kabuli</i>    | <i>Ca_Kabuli_Chr06</i>       | 56137878                       | (T/C)       |

| <b>S.N.</b> | <b>SNP IDs</b> | <b>Cultivars</b> | <b>Chromosomes/scaffolds</b> | <b>Physical positions (bp)</b> | <b>SNPs</b> |
|-------------|----------------|------------------|------------------------------|--------------------------------|-------------|
| 11387       | CakSNP11387    | <i>Kabuli</i>    | <i>Ca_Kabuli_Chr06</i>       | 56553930                       | (G/A)       |
| 11388       | CakSNP11388    | <i>Kabuli</i>    | <i>Ca_Kabuli_Chr06</i>       | 56564249                       | (G/C)       |
| 11389       | CakSNP11389    | <i>Kabuli</i>    | <i>Ca_Kabuli_Chr06</i>       | 56587094                       | (C/G)       |
| 11390       | CakSNP11390    | <i>Kabuli</i>    | <i>Ca_Kabuli_Chr06</i>       | 56593148                       | (A/G)       |
| 11391       | CakSNP11391    | <i>Kabuli</i>    | <i>Ca_Kabuli_Chr06</i>       | 56593121                       | (T/G)       |
| 11392       | CakSNP11392    | <i>Kabuli</i>    | <i>Ca_Kabuli_Chr06</i>       | 56624316                       | (A/T)       |
| 11393       | CakSNP11393    | <i>Kabuli</i>    | <i>Ca_Kabuli_Chr06</i>       | 56624674                       | (T/C)       |
| 11394       | CakSNP11394    | <i>Kabuli</i>    | <i>Ca_Kabuli_Chr06</i>       | 56624718                       | (C/A)       |
| 11395       | CakSNP11395    | <i>Kabuli</i>    | <i>Ca_Kabuli_Chr06</i>       | 56694898                       | (T/C)       |
| 11396       | CakSNP11396    | <i>Kabuli</i>    | <i>Ca_Kabuli_Chr06</i>       | 56765524                       | (C/A)       |
| 11397       | CakSNP11397    | <i>Kabuli</i>    | <i>Ca_Kabuli_Chr06</i>       | 56793077                       | (G/A)       |
| 11398       | CakSNP11398    | <i>Kabuli</i>    | <i>Ca_Kabuli_Chr06</i>       | 56793037                       | (A/T)       |
| 11399       | CakSNP11399    | <i>Kabuli</i>    | <i>Ca_Kabuli_Chr06</i>       | 56793021                       | (G/T)       |
| 11400       | CakSNP11400    | <i>Kabuli</i>    | <i>Ca_Kabuli_Chr06</i>       | 56793122                       | (C/T)       |
| 11401       | CakSNP11401    | <i>Kabuli</i>    | <i>Ca_Kabuli_Chr06</i>       | 56822084                       | (G/T)       |
| 11402       | CakSNP11402    | <i>Kabuli</i>    | <i>Ca_Kabuli_Chr06</i>       | 56822060                       | (G/A)       |
| 11403       | CakSNP11403    | <i>Kabuli</i>    | <i>Ca_Kabuli_Chr06</i>       | 56840030                       | (A/C)       |
| 11404       | CakSNP11404    | <i>Kabuli</i>    | <i>Ca_Kabuli_Chr06</i>       | 56840084                       | (A/T)       |
| 11405       | CakSNP11405    | <i>Kabuli</i>    | <i>Ca_Kabuli_Chr06</i>       | 56840063                       | (T/A)       |
| 11406       | CakSNP11406    | <i>Kabuli</i>    | <i>Ca_Kabuli_Chr06</i>       | 56840038                       | (A/T)       |
| 11407       | CakSNP11407    | <i>Kabuli</i>    | <i>Ca_Kabuli_Chr06</i>       | 56854753                       | (T/C)       |
| 11408       | CakSNP11408    | <i>Kabuli</i>    | <i>Ca_Kabuli_Chr06</i>       | 56946415                       | (A/G)       |
| 11409       | CakSNP11409    | <i>Kabuli</i>    | <i>Ca_Kabuli_Chr06</i>       | 56946431                       | (T/C)       |
| 11410       | CakSNP11410    | <i>Kabuli</i>    | <i>Ca_Kabuli_Chr06</i>       | 56950487                       | (G/T)       |
| 11411       | CakSNP11411    | <i>Kabuli</i>    | <i>Ca_Kabuli_Chr06</i>       | 56980313                       | (T/C)       |
| 11412       | CakSNP11412    | <i>Kabuli</i>    | <i>Ca_Kabuli_Chr06</i>       | 56980286                       | (T/C)       |
| 11413       | CakSNP11413    | <i>Kabuli</i>    | <i>Ca_Kabuli_Chr06</i>       | 56980321                       | (T/C)       |
| 11414       | CakSNP11414    | <i>Kabuli</i>    | <i>Ca_Kabuli_Chr06</i>       | 57147008                       | (A/G)       |
| 11415       | CakSNP11415    | <i>Kabuli</i>    | <i>Ca_Kabuli_Chr06</i>       | 57198837                       | (G/A)       |
| 11416       | CakSNP11416    | <i>Kabuli</i>    | <i>Ca_Kabuli_Chr06</i>       | 57259982                       | (C/A)       |
| 11417       | CakSNP11417    | <i>Kabuli</i>    | <i>Ca_Kabuli_Chr06</i>       | 57260020                       | (A/G)       |
| 11418       | CakSNP11418    | <i>Kabuli</i>    | <i>Ca_Kabuli_Chr06</i>       | 57260022                       | (T/C)       |
| 11419       | CakSNP11419    | <i>Kabuli</i>    | <i>Ca_Kabuli_Chr06</i>       | 57272604                       | (A/G)       |
| 11420       | CakSNP11420    | <i>Kabuli</i>    | <i>Ca_Kabuli_Chr06</i>       | 57272607                       | (G/A)       |
| 11421       | CakSNP11421    | <i>Kabuli</i>    | <i>Ca_Kabuli_Chr06</i>       | 57272608                       | (C/A)       |
| 11422       | CakSNP11422    | <i>Kabuli</i>    | <i>Ca_Kabuli_Chr06</i>       | 57277430                       | (A/G)       |
| 11423       | CakSNP11423    | <i>Kabuli</i>    | <i>Ca_Kabuli_Chr06</i>       | 57277440                       | (C/T)       |
| 11424       | CakSNP11424    | <i>Kabuli</i>    | <i>Ca_Kabuli_Chr06</i>       | 57344963                       | (G/T)       |
| 11425       | CakSNP11425    | <i>Kabuli</i>    | <i>Ca_Kabuli_Chr06</i>       | 57382220                       | (G/A)       |

| <b>S.N.</b> | <b>SNP IDs</b> | <b>Cultivars</b> | <b>Chromosomes/scaffolds</b> | <b>Physical positions (bp)</b> | <b>SNPs</b> |
|-------------|----------------|------------------|------------------------------|--------------------------------|-------------|
| 11426       | CakSNP11426    | <i>Kabuli</i>    | <i>Ca_Kabuli_Chr06</i>       | 57433674                       | (T/A)       |
| 11427       | CakSNP11427    | <i>Kabuli</i>    | <i>Ca_Kabuli_Chr06</i>       | 57436112                       | (A/T)       |
| 11428       | CakSNP11428    | <i>Kabuli</i>    | <i>Ca_Kabuli_Chr06</i>       | 57436119                       | (T/C)       |
| 11429       | CakSNP11429    | <i>Kabuli</i>    | <i>Ca_Kabuli_Chr06</i>       | 57436149                       | (T/A)       |
| 11430       | CakSNP11430    | <i>Kabuli</i>    | <i>Ca_Kabuli_Chr06</i>       | 57436320                       | (T/G)       |
| 11431       | CakSNP11431    | <i>Kabuli</i>    | <i>Ca_Kabuli_Chr06</i>       | 57437904                       | (A/G)       |
| 11432       | CakSNP11432    | <i>Kabuli</i>    | <i>Ca_Kabuli_Chr06</i>       | 57449892                       | (A/G)       |
| 11433       | CakSNP11433    | <i>Kabuli</i>    | <i>Ca_Kabuli_Chr06</i>       | 57475853                       | (G/T)       |
| 11434       | CakSNP11434    | <i>Kabuli</i>    | <i>Ca_Kabuli_Chr06</i>       | 57475892                       | (A/G)       |
| 11435       | CakSNP11435    | <i>Kabuli</i>    | <i>Ca_Kabuli_Chr06</i>       | 57475982                       | (A/G)       |
| 11436       | CakSNP11436    | <i>Kabuli</i>    | <i>Ca_Kabuli_Chr06</i>       | 57533087                       | (G/A)       |
| 11437       | CakSNP11437    | <i>Kabuli</i>    | <i>Ca_Kabuli_Chr06</i>       | 57579770                       | (G/T)       |
| 11438       | CakSNP11438    | <i>Kabuli</i>    | <i>Ca_Kabuli_Chr06</i>       | 57579768                       | (C/T)       |
| 11439       | CakSNP11439    | <i>Kabuli</i>    | <i>Ca_Kabuli_Chr06</i>       | 57580569                       | (C/T)       |
| 11440       | CakSNP11440    | <i>Kabuli</i>    | <i>Ca_Kabuli_Chr06</i>       | 57603257                       | (T/A)       |
| 11441       | CakSNP11441    | <i>Kabuli</i>    | <i>Ca_Kabuli_Chr06</i>       | 57625134                       | (G/A)       |
| 11442       | CakSNP11442    | <i>Kabuli</i>    | <i>Ca_Kabuli_Chr06</i>       | 57625320                       | (G/A)       |
| 11443       | CakSNP11443    | <i>Kabuli</i>    | <i>Ca_Kabuli_Chr06</i>       | 57632486                       | (C/T)       |
| 11444       | CakSNP11444    | <i>Kabuli</i>    | <i>Ca_Kabuli_Chr06</i>       | 57634387                       | (G/T)       |
| 11445       | CakSNP11445    | <i>Kabuli</i>    | <i>Ca_Kabuli_Chr06</i>       | 57634677                       | (G/A)       |
| 11446       | CakSNP11446    | <i>Kabuli</i>    | <i>Ca_Kabuli_Chr06</i>       | 57637091                       | (G/A)       |
| 11447       | CakSNP11447    | <i>Kabuli</i>    | <i>Ca_Kabuli_Chr06</i>       | 57637083                       | (T/G)       |
| 11448       | CakSNP11448    | <i>Kabuli</i>    | <i>Ca_Kabuli_Chr06</i>       | 57637075                       | (C/T)       |
| 11449       | CakSNP11449    | <i>Kabuli</i>    | <i>Ca_Kabuli_Chr06</i>       | 57662858                       | (T/A)       |
| 11450       | CakSNP11450    | <i>Kabuli</i>    | <i>Ca_Kabuli_Chr06</i>       | 57667515                       | (A/T)       |
| 11451       | CakSNP11451    | <i>Kabuli</i>    | <i>Ca_Kabuli_Chr06</i>       | 57688937                       | (C/T)       |
| 11452       | CakSNP11452    | <i>Kabuli</i>    | <i>Ca_Kabuli_Chr06</i>       | 57704057                       | (C/T)       |
| 11453       | CakSNP11453    | <i>Kabuli</i>    | <i>Ca_Kabuli_Chr06</i>       | 57704802                       | (T/C)       |
| 11454       | CakSNP11454    | <i>Kabuli</i>    | <i>Ca_Kabuli_Chr06</i>       | 57705011                       | (G/A)       |
| 11455       | CakSNP11455    | <i>Kabuli</i>    | <i>Ca_Kabuli_Chr06</i>       | 57707716                       | (C/T)       |
| 11456       | CakSNP11456    | <i>Kabuli</i>    | <i>Ca_Kabuli_Chr06</i>       | 57707724                       | (A/C)       |
| 11457       | CakSNP11457    | <i>Kabuli</i>    | <i>Ca_Kabuli_Chr06</i>       | 57707727                       | (T/G)       |
| 11458       | CakSNP11458    | <i>Kabuli</i>    | <i>Ca_Kabuli_Chr06</i>       | 57707848                       | (A/G)       |
| 11459       | CakSNP11459    | <i>Kabuli</i>    | <i>Ca_Kabuli_Chr06</i>       | 57707846                       | (G/A)       |
| 11460       | CakSNP11460    | <i>Kabuli</i>    | <i>Ca_Kabuli_Chr06</i>       | 57707912                       | (G/C)       |
| 11461       | CakSNP11461    | <i>Kabuli</i>    | <i>Ca_Kabuli_Chr06</i>       | 57708019                       | (A/G)       |
| 11462       | CakSNP11462    | <i>Kabuli</i>    | <i>Ca_Kabuli_Chr06</i>       | 57708130                       | (T/C)       |
| 11463       | CakSNP11463    | <i>Kabuli</i>    | <i>Ca_Kabuli_Chr06</i>       | 57708101                       | (T/G)       |
| 11464       | CakSNP11464    | <i>Kabuli</i>    | <i>Ca_Kabuli_Chr06</i>       | 57708198                       | (C/T)       |

| <b>S.N.</b> | <b>SNP IDs</b> | <b>Cultivars</b> | <b>Chromosomes/scaffolds</b> | <b>Physical positions (bp)</b> | <b>SNPs</b> |
|-------------|----------------|------------------|------------------------------|--------------------------------|-------------|
| 11465       | CakSNP11465    | <i>Kabuli</i>    | <i>Ca_Kabuli_Ch06</i>        | 57710133                       | (C/G)       |
| 11466       | CakSNP11466    | <i>Kabuli</i>    | <i>Ca_Kabuli_Ch06</i>        | 57720446                       | (T/C)       |
| 11467       | CakSNP11467    | <i>Kabuli</i>    | <i>Ca_Kabuli_Ch06</i>        | 57723992                       | (A/C)       |
| 11468       | CakSNP11468    | <i>Kabuli</i>    | <i>Ca_Kabuli_Ch06</i>        | 57725372                       | (A/C)       |
| 11469       | CakSNP11469    | <i>Kabuli</i>    | <i>Ca_Kabuli_Ch06</i>        | 57746989                       | (C/T)       |
| 11470       | CakSNP11470    | <i>Kabuli</i>    | <i>Ca_Kabuli_Ch06</i>        | 57747101                       | (C/T)       |
| 11471       | CakSNP11471    | <i>Kabuli</i>    | <i>Ca_Kabuli_Ch06</i>        | 57748565                       | (A/G)       |
| 11472       | CakSNP11472    | <i>Kabuli</i>    | <i>Ca_Kabuli_Ch06</i>        | 57748602                       | (A/T)       |
| 11473       | CakSNP11473    | <i>Kabuli</i>    | <i>Ca_Kabuli_Ch06</i>        | 57753076                       | (T/C)       |
| 11474       | CakSNP11474    | <i>Kabuli</i>    | <i>Ca_Kabuli_Ch06</i>        | 57756699                       | (G/A)       |
| 11475       | CakSNP11475    | <i>Kabuli</i>    | <i>Ca_Kabuli_Ch06</i>        | 57760109                       | (T/G)       |
| 11476       | CakSNP11476    | <i>Kabuli</i>    | <i>Ca_Kabuli_Ch06</i>        | 57760176                       | (C/T)       |
| 11477       | CakSNP11477    | <i>Kabuli</i>    | <i>Ca_Kabuli_Ch06</i>        | 57760227                       | (C/T)       |
| 11478       | CakSNP11478    | <i>Kabuli</i>    | <i>Ca_Kabuli_Ch06</i>        | 57760290                       | (A/T)       |
| 11479       | CakSNP11479    | <i>Kabuli</i>    | <i>Ca_Kabuli_Ch06</i>        | 57760291                       | (G/T)       |
| 11480       | CakSNP11480    | <i>Kabuli</i>    | <i>Ca_Kabuli_Ch06</i>        | 57760360                       | (A/G)       |
| 11481       | CakSNP11481    | <i>Kabuli</i>    | <i>Ca_Kabuli_Ch06</i>        | 57761758                       | (G/A)       |
| 11482       | CakSNP11482    | <i>Kabuli</i>    | <i>Ca_Kabuli_Ch06</i>        | 57761722                       | (T/C)       |
| 11483       | CakSNP11483    | <i>Kabuli</i>    | <i>Ca_Kabuli_Ch06</i>        | 57766444                       | (C/T)       |
| 11484       | CakSNP11484    | <i>Kabuli</i>    | <i>Ca_Kabuli_Ch06</i>        | 57766484                       | (T/A)       |
| 11485       | CakSNP11485    | <i>Kabuli</i>    | <i>Ca_Kabuli_Ch06</i>        | 57766483                       | (C/A)       |
| 11486       | CakSNP11486    | <i>Kabuli</i>    | <i>Ca_Kabuli_Ch06</i>        | 57766570                       | (C/T)       |
| 11487       | CakSNP11487    | <i>Kabuli</i>    | <i>Ca_Kabuli_Ch06</i>        | 57766588                       | (G/A)       |
| 11488       | CakSNP11488    | <i>Kabuli</i>    | <i>Ca_Kabuli_Ch06</i>        | 57766598                       | (G/A)       |
| 11489       | CakSNP11489    | <i>Kabuli</i>    | <i>Ca_Kabuli_Ch06</i>        | 57768314                       | (T/C)       |
| 11490       | CakSNP11490    | <i>Kabuli</i>    | <i>Ca_Kabuli_Ch06</i>        | 57801985                       | (A/C)       |
| 11491       | CakSNP11491    | <i>Kabuli</i>    | <i>Ca_Kabuli_Ch06</i>        | 57831050                       | (G/T)       |
| 11492       | CakSNP11492    | <i>Kabuli</i>    | <i>Ca_Kabuli_Ch06</i>        | 57831049                       | (C/T)       |
| 11493       | CakSNP11493    | <i>Kabuli</i>    | <i>Ca_Kabuli_Ch06</i>        | 57831040                       | (T/C)       |
| 11494       | CakSNP11494    | <i>Kabuli</i>    | <i>Ca_Kabuli_Ch06</i>        | 57835093                       | (T/A)       |
| 11495       | CakSNP11495    | <i>Kabuli</i>    | <i>Ca_Kabuli_Ch06</i>        | 57835120                       | (G/A)       |
| 11496       | CakSNP11496    | <i>Kabuli</i>    | <i>Ca_Kabuli_Ch06</i>        | 57835917                       | (G/C)       |
| 11497       | CakSNP11497    | <i>Kabuli</i>    | <i>Ca_Kabuli_Ch06</i>        | 57835899                       | (C/T)       |
| 11498       | CakSNP11498    | <i>Kabuli</i>    | <i>Ca_Kabuli_Ch06</i>        | 57836024                       | (G/A)       |
| 11499       | CakSNP11499    | <i>Kabuli</i>    | <i>Ca_Kabuli_Ch06</i>        | 57836237                       | (A/G)       |
| 11500       | CakSNP11500    | <i>Kabuli</i>    | <i>Ca_Kabuli_Ch06</i>        | 57836284                       | (G/A)       |
| 11501       | CakSNP11501    | <i>Kabuli</i>    | <i>Ca_Kabuli_Ch06</i>        | 57836314                       | (T/A)       |
| 11502       | CakSNP11502    | <i>Kabuli</i>    | <i>Ca_Kabuli_Ch06</i>        | 57836316                       | (G/A)       |
| 11503       | CakSNP11503    | <i>Kabuli</i>    | <i>Ca_Kabuli_Ch06</i>        | 57870893                       | (C/A)       |



| <b>S.N.</b> | <b>SNP IDs</b> | <b>Cultivars</b> | <b>Chromosomes/scaffolds</b> | <b>Physical positions (bp)</b> | <b>SNPs</b> |
|-------------|----------------|------------------|------------------------------|--------------------------------|-------------|
| 11504       | CakSNP11504    | <i>Kabuli</i>    | <i>Ca_Kabuli_Chr06</i>       | 57877446                       | (C/A)       |
| 11505       | CakSNP11505    | <i>Kabuli</i>    | <i>Ca_Kabuli_Chr06</i>       | 57882364                       | (C/T)       |
| 11506       | CakSNP11506    | <i>Kabuli</i>    | <i>Ca_Kabuli_Chr06</i>       | 57894377                       | (A/G)       |
| 11507       | CakSNP11507    | <i>Kabuli</i>    | <i>Ca_Kabuli_Chr06</i>       | 57894495                       | (C/G)       |
| 11508       | CakSNP11508    | <i>Kabuli</i>    | <i>Ca_Kabuli_Chr06</i>       | 57894590                       | (G/C)       |
| 11509       | CakSNP11509    | <i>Kabuli</i>    | <i>Ca_Kabuli_Chr06</i>       | 57894585                       | (T/G)       |
| 11510       | CakSNP11510    | <i>Kabuli</i>    | <i>Ca_Kabuli_Chr06</i>       | 57904599                       | (T/C)       |
| 11511       | CakSNP11511    | <i>Kabuli</i>    | <i>Ca_Kabuli_Chr06</i>       | 57921373                       | (C/T)       |
| 11512       | CakSNP11512    | <i>Kabuli</i>    | <i>Ca_Kabuli_Chr06</i>       | 57943585                       | (A/T)       |
| 11513       | CakSNP11513    | <i>Kabuli</i>    | <i>Ca_Kabuli_Chr06</i>       | 57943626                       | (G/A)       |
| 11514       | CakSNP11514    | <i>Kabuli</i>    | <i>Ca_Kabuli_Chr06</i>       | 57943628                       | (A/C)       |
| 11515       | CakSNP11515    | <i>Kabuli</i>    | <i>Ca_Kabuli_Chr06</i>       | 57944439                       | (C/T)       |
| 11516       | CakSNP11516    | <i>Kabuli</i>    | <i>Ca_Kabuli_Chr06</i>       | 57968924                       | (A/T)       |
| 11517       | CakSNP11517    | <i>Kabuli</i>    | <i>Ca_Kabuli_Chr06</i>       | 58036471                       | (C/T)       |
| 11518       | CakSNP11518    | <i>Kabuli</i>    | <i>Ca_Kabuli_Chr06</i>       | 58174702                       | (T/C)       |
| 11519       | CakSNP11519    | <i>Kabuli</i>    | <i>Ca_Kabuli_Chr06</i>       | 58187822                       | (T/G)       |
| 11520       | CakSNP11520    | <i>Kabuli</i>    | <i>Ca_Kabuli_Chr06</i>       | 58187859                       | (T/A)       |
| 11521       | CakSNP11521    | <i>Kabuli</i>    | <i>Ca_Kabuli_Chr06</i>       | 58187957                       | (A/G)       |
| 11522       | CakSNP11522    | <i>Kabuli</i>    | <i>Ca_Kabuli_Chr06</i>       | 58191050                       | (T/C)       |
| 11523       | CakSNP11523    | <i>Kabuli</i>    | <i>Ca_Kabuli_Chr06</i>       | 58224023                       | (G/T)       |
| 11524       | CakSNP11524    | <i>Kabuli</i>    | <i>Ca_Kabuli_Chr06</i>       | 58226908                       | (T/G)       |
| 11525       | CakSNP11525    | <i>Kabuli</i>    | <i>Ca_Kabuli_Chr06</i>       | 58227006                       | (T/C)       |
| 11526       | CakSNP11526    | <i>Kabuli</i>    | <i>Ca_Kabuli_Chr06</i>       | 58237503                       | (A/T)       |
| 11527       | CakSNP11527    | <i>Kabuli</i>    | <i>Ca_Kabuli_Chr06</i>       | 58238371                       | (T/C)       |
| 11528       | CakSNP11528    | <i>Kabuli</i>    | <i>Ca_Kabuli_Chr06</i>       | 58238397                       | (A/G)       |
| 11529       | CakSNP11529    | <i>Kabuli</i>    | <i>Ca_Kabuli_Chr06</i>       | 58243505                       | (G/A)       |
| 11530       | CakSNP11530    | <i>Kabuli</i>    | <i>Ca_Kabuli_Chr06</i>       | 58326344                       | (A/T)       |
| 11531       | CakSNP11531    | <i>Kabuli</i>    | <i>Ca_Kabuli_Chr06</i>       | 58380367                       | (T/C)       |
| 11532       | CakSNP11532    | <i>Kabuli</i>    | <i>Ca_Kabuli_Chr06</i>       | 58380394                       | (G/A)       |
| 11533       | CakSNP11533    | <i>Kabuli</i>    | <i>Ca_Kabuli_Chr06</i>       | 58380563                       | (G/A)       |
| 11534       | CakSNP11534    | <i>Kabuli</i>    | <i>Ca_Kabuli_Chr06</i>       | 58381203                       | (G/C)       |
| 11535       | CakSNP11535    | <i>Kabuli</i>    | <i>Ca_Kabuli_Chr06</i>       | 58381259                       | (A/G)       |
| 11536       | CakSNP11536    | <i>Kabuli</i>    | <i>Ca_Kabuli_Chr06</i>       | 58434217                       | (C/G)       |
| 11537       | CakSNP11537    | <i>Kabuli</i>    | <i>Ca_Kabuli_Chr06</i>       | 58452843                       | (A/C)       |
| 11538       | CakSNP11538    | <i>Kabuli</i>    | <i>Ca_Kabuli_Chr06</i>       | 58569576                       | (G/T)       |
| 11539       | CakSNP11539    | <i>Kabuli</i>    | <i>Ca_Kabuli_Chr06</i>       | 58569569                       | (T/C)       |
| 11540       | CakSNP11540    | <i>Kabuli</i>    | <i>Ca_Kabuli_Chr06</i>       | 58571660                       | (T/C)       |
| 11541       | CakSNP11541    | <i>Kabuli</i>    | <i>Ca_Kabuli_Chr06</i>       | 58596821                       | (T/G)       |
| 11542       | CakSNP11542    | <i>Kabuli</i>    | <i>Ca_Kabuli_Chr06</i>       | 58596878                       | (C/A)       |

| <b>S.N.</b> | <b>SNP IDs</b> | <b>Cultivars</b> | <b>Chromosomes/scaffolds</b> | <b>Physical positions (bp)</b> | <b>SNPs</b> |
|-------------|----------------|------------------|------------------------------|--------------------------------|-------------|
| 11543       | CakSNP11543    | <i>Kabuli</i>    | <i>Ca_Kabuli_Chr06</i>       | 58596968                       | (T/C)       |
| 11544       | CakSNP11544    | <i>Kabuli</i>    | <i>Ca_Kabuli_Chr06</i>       | 58596918                       | (A/G)       |
| 11545       | CakSNP11545    | <i>Kabuli</i>    | <i>Ca_Kabuli_Chr06</i>       | 58600930                       | (C/A)       |
| 11546       | CakSNP11546    | <i>Kabuli</i>    | <i>Ca_Kabuli_Chr06</i>       | 58600952                       | (A/G)       |
| 11547       | CakSNP11547    | <i>Kabuli</i>    | <i>Ca_Kabuli_Chr06</i>       | 58600974                       | (A/G)       |
| 11548       | CakSNP11548    | <i>Kabuli</i>    | <i>Ca_Kabuli_Chr06</i>       | 58623095                       | (A/G)       |
| 11549       | CakSNP11549    | <i>Kabuli</i>    | <i>Ca_Kabuli_Chr06</i>       | 58623096                       | (A/T)       |
| 11550       | CakSNP11550    | <i>Kabuli</i>    | <i>Ca_Kabuli_Chr06</i>       | 58623220                       | (T/C)       |
| 11551       | CakSNP11551    | <i>Kabuli</i>    | <i>Ca_Kabuli_Chr06</i>       | 58624183                       | (G/A)       |
| 11552       | CakSNP11552    | <i>Kabuli</i>    | <i>Ca_Kabuli_Chr06</i>       | 58624233                       | (C/A)       |
| 11553       | CakSNP11553    | <i>Kabuli</i>    | <i>Ca_Kabuli_Chr06</i>       | 58624299                       | (A/G)       |
| 11554       | CakSNP11554    | <i>Kabuli</i>    | <i>Ca_Kabuli_Chr06</i>       | 58624281                       | (A/G)       |
| 11555       | CakSNP11555    | <i>Kabuli</i>    | <i>Ca_Kabuli_Chr06</i>       | 58624251                       | (C/T)       |
| 11556       | CakSNP11556    | <i>Kabuli</i>    | <i>Ca_Kabuli_Chr06</i>       | 58650354                       | (A/G)       |
| 11557       | CakSNP11557    | <i>Kabuli</i>    | <i>Ca_Kabuli_Chr06</i>       | 58650330                       | (G/A)       |
| 11558       | CakSNP11558    | <i>Kabuli</i>    | <i>Ca_Kabuli_Chr06</i>       | 58650318                       | (A/C)       |
| 11559       | CakSNP11559    | <i>Kabuli</i>    | <i>Ca_Kabuli_Chr06</i>       | 58650459                       | (A/T)       |
| 11560       | CakSNP11560    | <i>Kabuli</i>    | <i>Ca_Kabuli_Chr06</i>       | 58650491                       | (A/G)       |
| 11561       | CakSNP11561    | <i>Kabuli</i>    | <i>Ca_Kabuli_Chr06</i>       | 58652881                       | (A/G)       |
| 11562       | CakSNP11562    | <i>Kabuli</i>    | <i>Ca_Kabuli_Chr06</i>       | 58672317                       | (A/G)       |
| 11563       | CakSNP11563    | <i>Kabuli</i>    | <i>Ca_Kabuli_Chr06</i>       | 58675788                       | (T/C)       |
| 11564       | CakSNP11564    | <i>Kabuli</i>    | <i>Ca_Kabuli_Chr06</i>       | 58675749                       | (T/C)       |
| 11565       | CakSNP11565    | <i>Kabuli</i>    | <i>Ca_Kabuli_Chr06</i>       | 58676507                       | (A/G)       |
| 11566       | CakSNP11566    | <i>Kabuli</i>    | <i>Ca_Kabuli_Chr06</i>       | 58676517                       | (A/C)       |
| 11567       | CakSNP11567    | <i>Kabuli</i>    | <i>Ca_Kabuli_Chr06</i>       | 58682427                       | (G/T)       |
| 11568       | CakSNP11568    | <i>Kabuli</i>    | <i>Ca_Kabuli_Chr06</i>       | 58682397                       | (G/A)       |
| 11569       | CakSNP11569    | <i>Kabuli</i>    | <i>Ca_Kabuli_Chr06</i>       | 58682387                       | (T/A)       |
| 11570       | CakSNP11570    | <i>Kabuli</i>    | <i>Ca_Kabuli_Chr06</i>       | 58730925                       | (T/C)       |
| 11571       | CakSNP11571    | <i>Kabuli</i>    | <i>Ca_Kabuli_Chr06</i>       | 58730969                       | (C/A)       |
| 11572       | CakSNP11572    | <i>Kabuli</i>    | <i>Ca_Kabuli_Chr06</i>       | 58730967                       | (T/G)       |
| 11573       | CakSNP11573    | <i>Kabuli</i>    | <i>Ca_Kabuli_Chr06</i>       | 58732424                       | (G/T)       |
| 11574       | CakSNP11574    | <i>Kabuli</i>    | <i>Ca_Kabuli_Chr06</i>       | 58732423                       | (C/T)       |
| 11575       | CakSNP11575    | <i>Kabuli</i>    | <i>Ca_Kabuli_Chr06</i>       | 58732514                       | (G/A)       |
| 11576       | CakSNP11576    | <i>Kabuli</i>    | <i>Ca_Kabuli_Chr06</i>       | 58732451                       | (T/C)       |
| 11577       | CakSNP11577    | <i>Kabuli</i>    | <i>Ca_Kabuli_Chr06</i>       | 58732475                       | (G/A)       |
| 11578       | CakSNP11578    | <i>Kabuli</i>    | <i>Ca_Kabuli_Chr06</i>       | 58745356                       | (A/G)       |
| 11579       | CakSNP11579    | <i>Kabuli</i>    | <i>Ca_Kabuli_Chr06</i>       | 58745473                       | (A/G)       |
| 11580       | CakSNP11580    | <i>Kabuli</i>    | <i>Ca_Kabuli_Chr06</i>       | 58745426                       | (T/C)       |
| 11581       | CakSNP11581    | <i>Kabuli</i>    | <i>Ca_Kabuli_Chr06</i>       | 58745583                       | (C/T)       |

| <b>S.N.</b> | <b>SNP IDs</b> | <b>Cultivars</b> | <b>Chromosomes/scaffolds</b> | <b>Physical positions (bp)</b> | <b>SNPs</b> |
|-------------|----------------|------------------|------------------------------|--------------------------------|-------------|
| 11582       | CakSNP11582    | <i>Kabuli</i>    | <i>Ca_Kabuli_Chr06</i>       | 58761879                       | (G/A)       |
| 11583       | CakSNP11583    | <i>Kabuli</i>    | <i>Ca_Kabuli_Chr06</i>       | 58779344                       | (A/G)       |
| 11584       | CakSNP11584    | <i>Kabuli</i>    | <i>Ca_Kabuli_Chr06</i>       | 58779389                       | (T/G)       |
| 11585       | CakSNP11585    | <i>Kabuli</i>    | <i>Ca_Kabuli_Chr06</i>       | 58820632                       | (A/C)       |
| 11586       | CakSNP11586    | <i>Kabuli</i>    | <i>Ca_Kabuli_Chr06</i>       | 58844717                       | (T/C)       |
| 11587       | CakSNP11587    | <i>Kabuli</i>    | <i>Ca_Kabuli_Chr06</i>       | 58844744                       | (A/T)       |
| 11588       | CakSNP11588    | <i>Kabuli</i>    | <i>Ca_Kabuli_Chr06</i>       | 58844776                       | (C/G)       |
| 11589       | CakSNP11589    | <i>Kabuli</i>    | <i>Ca_Kabuli_Chr06</i>       | 58861614                       | (G/A)       |
| 11590       | CakSNP11590    | <i>Kabuli</i>    | <i>Ca_Kabuli_Chr06</i>       | 58878604                       | (C/G)       |
| 11591       | CakSNP11591    | <i>Kabuli</i>    | <i>Ca_Kabuli_Chr06</i>       | 58879570                       | (T/C)       |
| 11592       | CakSNP11592    | <i>Kabuli</i>    | <i>Ca_Kabuli_Chr06</i>       | 58903346                       | (G/A)       |
| 11593       | CakSNP11593    | <i>Kabuli</i>    | <i>Ca_Kabuli_Chr06</i>       | 58903381                       | (G/A)       |
| 11594       | CakSNP11594    | <i>Kabuli</i>    | <i>Ca_Kabuli_Chr06</i>       | 58903395                       | (A/G)       |
| 11595       | CakSNP11595    | <i>Kabuli</i>    | <i>Ca_Kabuli_Chr06</i>       | 58903416                       | (T/G)       |
| 11596       | CakSNP11596    | <i>Kabuli</i>    | <i>Ca_Kabuli_Chr06</i>       | 58903497                       | (G/C)       |
| 11597       | CakSNP11597    | <i>Kabuli</i>    | <i>Ca_Kabuli_Chr06</i>       | 58903538                       | (G/A)       |
| 11598       | CakSNP11598    | <i>Kabuli</i>    | <i>Ca_Kabuli_Chr06</i>       | 58908024                       | (G/A)       |
| 11599       | CakSNP11599    | <i>Kabuli</i>    | <i>Ca_Kabuli_Chr06</i>       | 58908045                       | (A/G)       |
| 11600       | CakSNP11600    | <i>Kabuli</i>    | <i>Ca_Kabuli_Chr06</i>       | 58908069                       | (G/A)       |
| 11601       | CakSNP11601    | <i>Kabuli</i>    | <i>Ca_Kabuli_Chr06</i>       | 58911548                       | (T/C)       |
| 11602       | CakSNP11602    | <i>Kabuli</i>    | <i>Ca_Kabuli_Chr06</i>       | 58951079                       | (T/C)       |
| 11603       | CakSNP11603    | <i>Kabuli</i>    | <i>Ca_Kabuli_Chr06</i>       | 58951298                       | (A/G)       |
| 11604       | CakSNP11604    | <i>Kabuli</i>    | <i>Ca_Kabuli_Chr06</i>       | 58951583                       | (C/A)       |
| 11605       | CakSNP11605    | <i>Kabuli</i>    | <i>Ca_Kabuli_Chr06</i>       | 58953219                       | (A/G)       |
| 11606       | CakSNP11606    | <i>Kabuli</i>    | <i>Ca_Kabuli_Chr06</i>       | 58994014                       | (C/T)       |
| 11607       | CakSNP11607    | <i>Kabuli</i>    | <i>Ca_Kabuli_Chr06</i>       | 58994083                       | (A/G)       |
| 11608       | CakSNP11608    | <i>Kabuli</i>    | <i>Ca_Kabuli_Chr06</i>       | 58994281                       | (G/A)       |
| 11609       | CakSNP11609    | <i>Kabuli</i>    | <i>Ca_Kabuli_Chr06</i>       | 59001443                       | (C/T)       |
| 11610       | CakSNP11610    | <i>Kabuli</i>    | <i>Ca_Kabuli_Chr06</i>       | 59003792                       | (A/C)       |
| 11611       | CakSNP11611    | <i>Kabuli</i>    | <i>Ca_Kabuli_Chr06</i>       | 59064798                       | (G/T)       |
| 11612       | CakSNP11612    | <i>Kabuli</i>    | <i>Ca_Kabuli_Chr06</i>       | 59064815                       | (C/T)       |
| 11613       | CakSNP11613    | <i>Kabuli</i>    | <i>Ca_Kabuli_Chr06</i>       | 59081169                       | (C/T)       |
| 11614       | CakSNP11614    | <i>Kabuli</i>    | <i>Ca_Kabuli_Chr06</i>       | 59107027                       | (A/T)       |
| 11615       | CakSNP11615    | <i>Kabuli</i>    | <i>Ca_Kabuli_Chr06</i>       | 59107007                       | (G/T)       |
| 11616       | CakSNP11616    | <i>Kabuli</i>    | <i>Ca_Kabuli_Chr06</i>       | 59135944                       | (A/C)       |
| 11617       | CakSNP11617    | <i>Kabuli</i>    | <i>Ca_Kabuli_Chr06</i>       | 59194015                       | (C/G)       |
| 11618       | CakSNP11618    | <i>Kabuli</i>    | <i>Ca_Kabuli_Chr06</i>       | 59193994                       | (G/T)       |
| 11619       | CakSNP11619    | <i>Kabuli</i>    | <i>Ca_Kabuli_Chr06</i>       | 59194081                       | (T/A)       |
| 11620       | CakSNP11620    | <i>Kabuli</i>    | <i>Ca_Kabuli_Chr06</i>       | 59202825                       | (T/G)       |

| <b>S.N.</b> | <b>SNP IDs</b> | <b>Cultivars</b> | <b>Chromosomes/scaffolds</b> | <b>Physical positions (bp)</b> | <b>SNPs</b> |
|-------------|----------------|------------------|------------------------------|--------------------------------|-------------|
| 11621       | CakSNP11621    | <i>Kabuli</i>    | <i>Ca_Kabuli_Chr06</i>       | 59219099                       | (T/C)       |
| 11622       | CakSNP11622    | <i>Kabuli</i>    | <i>Ca_Kabuli_Chr06</i>       | 59222848                       | (C/T)       |
| 11623       | CakSNP11623    | <i>Kabuli</i>    | <i>Ca_Kabuli_Chr06</i>       | 59296368                       | (C/T)       |
| 11624       | CakSNP11624    | <i>Kabuli</i>    | <i>Ca_Kabuli_Chr06</i>       | 59296460                       | (G/A)       |
| 11625       | CakSNP11625    | <i>Kabuli</i>    | <i>Ca_Kabuli_Chr06</i>       | 59407761                       | (G/A)       |
| 11626       | CakSNP11626    | <i>Kabuli</i>    | <i>Ca_Kabuli_Chr06</i>       | 59417984                       | (G/A)       |
| 11627       | CakSNP11627    | <i>Kabuli</i>    | <i>Ca_Kabuli_Chr07</i>       | 16760                          | (T/G)       |
| 11628       | CakSNP11628    | <i>Kabuli</i>    | <i>Ca_Kabuli_Chr07</i>       | 16850                          | (C/T)       |
| 11629       | CakSNP11629    | <i>Kabuli</i>    | <i>Ca_Kabuli_Chr07</i>       | 16880                          | (G/A)       |
| 11630       | CakSNP11630    | <i>Kabuli</i>    | <i>Ca_Kabuli_Chr07</i>       | 16881                          | (A/G)       |
| 11631       | CakSNP11631    | <i>Kabuli</i>    | <i>Ca_Kabuli_Chr07</i>       | 41841                          | (G/A)       |
| 11632       | CakSNP11632    | <i>Kabuli</i>    | <i>Ca_Kabuli_Chr07</i>       | 55131                          | (T/C)       |
| 11633       | CakSNP11633    | <i>Kabuli</i>    | <i>Ca_Kabuli_Chr07</i>       | 208824                         | (A/G)       |
| 11634       | CakSNP11634    | <i>Kabuli</i>    | <i>Ca_Kabuli_Chr07</i>       | 218346                         | (C/A)       |
| 11635       | CakSNP11635    | <i>Kabuli</i>    | <i>Ca_Kabuli_Chr07</i>       | 218341                         | (C/G)       |
| 11636       | CakSNP11636    | <i>Kabuli</i>    | <i>Ca_Kabuli_Chr07</i>       | 419301                         | (C/T)       |
| 11637       | CakSNP11637    | <i>Kabuli</i>    | <i>Ca_Kabuli_Chr07</i>       | 419316                         | (A/G)       |
| 11638       | CakSNP11638    | <i>Kabuli</i>    | <i>Ca_Kabuli_Chr07</i>       | 419334                         | (A/C)       |
| 11639       | CakSNP11639    | <i>Kabuli</i>    | <i>Ca_Kabuli_Chr07</i>       | 419385                         | (T/G)       |
| 11640       | CakSNP11640    | <i>Kabuli</i>    | <i>Ca_Kabuli_Chr07</i>       | 419328                         | (C/T)       |
| 11641       | CakSNP11641    | <i>Kabuli</i>    | <i>Ca_Kabuli_Chr07</i>       | 419679                         | (C/T)       |
| 11642       | CakSNP11642    | <i>Kabuli</i>    | <i>Ca_Kabuli_Chr07</i>       | 419638                         | (C/T)       |
| 11643       | CakSNP11643    | <i>Kabuli</i>    | <i>Ca_Kabuli_Chr07</i>       | 419628                         | (A/C)       |
| 11644       | CakSNP11644    | <i>Kabuli</i>    | <i>Ca_Kabuli_Chr07</i>       | 528521                         | (G/A)       |
| 11645       | CakSNP11645    | <i>Kabuli</i>    | <i>Ca_Kabuli_Chr07</i>       | 601563                         | (T/A)       |
| 11646       | CakSNP11646    | <i>Kabuli</i>    | <i>Ca_Kabuli_Chr07</i>       | 601551                         | (T/C)       |
| 11647       | CakSNP11647    | <i>Kabuli</i>    | <i>Ca_Kabuli_Chr07</i>       | 601545                         | (C/T)       |
| 11648       | CakSNP11648    | <i>Kabuli</i>    | <i>Ca_Kabuli_Chr07</i>       | 601538                         | (C/A)       |
| 11649       | CakSNP11649    | <i>Kabuli</i>    | <i>Ca_Kabuli_Chr07</i>       | 601521                         | (G/A)       |
| 11650       | CakSNP11650    | <i>Kabuli</i>    | <i>Ca_Kabuli_Chr07</i>       | 601516                         | (G/A)       |
| 11651       | CakSNP11651    | <i>Kabuli</i>    | <i>Ca_Kabuli_Chr07</i>       | 601513                         | (C/G)       |
| 11652       | CakSNP11652    | <i>Kabuli</i>    | <i>Ca_Kabuli_Chr07</i>       | 601502                         | (G/T)       |
| 11653       | CakSNP11653    | <i>Kabuli</i>    | <i>Ca_Kabuli_Chr07</i>       | 601496                         | (C/T)       |
| 11654       | CakSNP11654    | <i>Kabuli</i>    | <i>Ca_Kabuli_Chr07</i>       | 601586                         | (C/T)       |
| 11655       | CakSNP11655    | <i>Kabuli</i>    | <i>Ca_Kabuli_Chr07</i>       | 601601                         | (C/T)       |
| 11656       | CakSNP11656    | <i>Kabuli</i>    | <i>Ca_Kabuli_Chr07</i>       | 601612                         | (A/G)       |
| 11657       | CakSNP11657    | <i>Kabuli</i>    | <i>Ca_Kabuli_Chr07</i>       | 601643                         | (G/T)       |
| 11658       | CakSNP11658    | <i>Kabuli</i>    | <i>Ca_Kabuli_Chr07</i>       | 601622                         | (G/C)       |
| 11659       | CakSNP11659    | <i>Kabuli</i>    | <i>Ca_Kabuli_Chr07</i>       | 601657                         | (C/T)       |

| <b>S.N.</b> | <b>SNP IDs</b> | <b>Cultivars</b> | <b>Chromosomes/scaffolds</b> | <b>Physical positions (bp)</b> | <b>SNPs</b> |
|-------------|----------------|------------------|------------------------------|--------------------------------|-------------|
| 11660       | CakSNP11660    | <i>Kabuli</i>    | <i>Ca_Kabuli_Chr07</i>       | 601719                         | (G/T)       |
| 11661       | CakSNP11661    | <i>Kabuli</i>    | <i>Ca_Kabuli_Chr07</i>       | 601718                         | (G/C)       |
| 11662       | CakSNP11662    | <i>Kabuli</i>    | <i>Ca_Kabuli_Chr07</i>       | 601714                         | (A/T)       |
| 11663       | CakSNP11663    | <i>Kabuli</i>    | <i>Ca_Kabuli_Chr07</i>       | 601709                         | (A/C)       |
| 11664       | CakSNP11664    | <i>Kabuli</i>    | <i>Ca_Kabuli_Chr07</i>       | 601683                         | (G/A)       |
| 11665       | CakSNP11665    | <i>Kabuli</i>    | <i>Ca_Kabuli_Chr07</i>       | 601647                         | (C/T)       |
| 11666       | CakSNP11666    | <i>Kabuli</i>    | <i>Ca_Kabuli_Chr07</i>       | 610737                         | (C/A)       |
| 11667       | CakSNP11667    | <i>Kabuli</i>    | <i>Ca_Kabuli_Chr07</i>       | 610723                         | (G/T)       |
| 11668       | CakSNP11668    | <i>Kabuli</i>    | <i>Ca_Kabuli_Chr07</i>       | 667597                         | (C/T)       |
| 11669       | CakSNP11669    | <i>Kabuli</i>    | <i>Ca_Kabuli_Chr07</i>       | 674791                         | (A/T)       |
| 11670       | CakSNP11670    | <i>Kabuli</i>    | <i>Ca_Kabuli_Chr07</i>       | 676785                         | (G/T)       |
| 11671       | CakSNP11671    | <i>Kabuli</i>    | <i>Ca_Kabuli_Chr07</i>       | 676786                         | (G/A)       |
| 11672       | CakSNP11672    | <i>Kabuli</i>    | <i>Ca_Kabuli_Chr07</i>       | 676790                         | (T/C)       |
| 11673       | CakSNP11673    | <i>Kabuli</i>    | <i>Ca_Kabuli_Chr07</i>       | 683245                         | (T/C)       |
| 11674       | CakSNP11674    | <i>Kabuli</i>    | <i>Ca_Kabuli_Chr07</i>       | 761710                         | (A/G)       |
| 11675       | CakSNP11675    | <i>Kabuli</i>    | <i>Ca_Kabuli_Chr07</i>       | 767708                         | (G/A)       |
| 11676       | CakSNP11676    | <i>Kabuli</i>    | <i>Ca_Kabuli_Chr07</i>       | 781377                         | (G/T)       |
| 11677       | CakSNP11677    | <i>Kabuli</i>    | <i>Ca_Kabuli_Chr07</i>       | 781409                         | (A/G)       |
| 11678       | CakSNP11678    | <i>Kabuli</i>    | <i>Ca_Kabuli_Chr07</i>       | 807095                         | (A/T)       |
| 11679       | CakSNP11679    | <i>Kabuli</i>    | <i>Ca_Kabuli_Chr07</i>       | 807110                         | (T/C)       |
| 11680       | CakSNP11680    | <i>Kabuli</i>    | <i>Ca_Kabuli_Chr07</i>       | 807133                         | (T/A)       |
| 11681       | CakSNP11681    | <i>Kabuli</i>    | <i>Ca_Kabuli_Chr07</i>       | 815477                         | (A/T)       |
| 11682       | CakSNP11682    | <i>Kabuli</i>    | <i>Ca_Kabuli_Chr07</i>       | 815526                         | (C/A)       |
| 11683       | CakSNP11683    | <i>Kabuli</i>    | <i>Ca_Kabuli_Chr07</i>       | 838581                         | (C/A)       |
| 11684       | CakSNP11684    | <i>Kabuli</i>    | <i>Ca_Kabuli_Chr07</i>       | 838651                         | (A/C)       |
| 11685       | CakSNP11685    | <i>Kabuli</i>    | <i>Ca_Kabuli_Chr07</i>       | 841988                         | (T/C)       |
| 11686       | CakSNP11686    | <i>Kabuli</i>    | <i>Ca_Kabuli_Chr07</i>       | 844248                         | (G/A)       |
| 11687       | CakSNP11687    | <i>Kabuli</i>    | <i>Ca_Kabuli_Chr07</i>       | 845488                         | (A/G)       |
| 11688       | CakSNP11688    | <i>Kabuli</i>    | <i>Ca_Kabuli_Chr07</i>       | 865007                         | (C/T)       |
| 11689       | CakSNP11689    | <i>Kabuli</i>    | <i>Ca_Kabuli_Chr07</i>       | 865170                         | (C/T)       |
| 11690       | CakSNP11690    | <i>Kabuli</i>    | <i>Ca_Kabuli_Chr07</i>       | 873207                         | (A/G)       |
| 11691       | CakSNP11691    | <i>Kabuli</i>    | <i>Ca_Kabuli_Chr07</i>       | 888900                         | (G/A)       |
| 11692       | CakSNP11692    | <i>Kabuli</i>    | <i>Ca_Kabuli_Chr07</i>       | 888987                         | (A/G)       |
| 11693       | CakSNP11693    | <i>Kabuli</i>    | <i>Ca_Kabuli_Chr07</i>       | 975236                         | (T/A)       |
| 11694       | CakSNP11694    | <i>Kabuli</i>    | <i>Ca_Kabuli_Chr07</i>       | 993031                         | (G/T)       |
| 11695       | CakSNP11695    | <i>Kabuli</i>    | <i>Ca_Kabuli_Chr07</i>       | 994976                         | (G/A)       |
| 11696       | CakSNP11696    | <i>Kabuli</i>    | <i>Ca_Kabuli_Chr07</i>       | 995691                         | (C/T)       |
| 11697       | CakSNP11697    | <i>Kabuli</i>    | <i>Ca_Kabuli_Chr07</i>       | 995674                         | (T/C)       |
| 11698       | CakSNP11698    | <i>Kabuli</i>    | <i>Ca_Kabuli_Chr07</i>       | 1022946                        | (C/T)       |

| <b>S.N.</b> | <b>SNP IDs</b> | <b>Cultivars</b> | <b>Chromosomes/scaffolds</b> | <b>Physical positions (bp)</b> | <b>SNPs</b> |
|-------------|----------------|------------------|------------------------------|--------------------------------|-------------|
| 11699       | CakSNP11699    | <i>Kabuli</i>    | <i>Ca_Kabuli_Chr07</i>       | 1045113                        | (A/C)       |
| 11700       | CakSNP11700    | <i>Kabuli</i>    | <i>Ca_Kabuli_Chr07</i>       | 1045127                        | (T/A)       |
| 11701       | CakSNP11701    | <i>Kabuli</i>    | <i>Ca_Kabuli_Chr07</i>       | 1096379                        | (C/T)       |
| 11702       | CakSNP11702    | <i>Kabuli</i>    | <i>Ca_Kabuli_Chr07</i>       | 1153267                        | (A/C)       |
| 11703       | CakSNP11703    | <i>Kabuli</i>    | <i>Ca_Kabuli_Chr07</i>       | 1174188                        | (C/T)       |
| 11704       | CakSNP11704    | <i>Kabuli</i>    | <i>Ca_Kabuli_Chr07</i>       | 1293601                        | (C/G)       |
| 11705       | CakSNP11705    | <i>Kabuli</i>    | <i>Ca_Kabuli_Chr07</i>       | 1350605                        | (C/T)       |
| 11706       | CakSNP11706    | <i>Kabuli</i>    | <i>Ca_Kabuli_Chr07</i>       | 1350856                        | (G/T)       |
| 11707       | CakSNP11707    | <i>Kabuli</i>    | <i>Ca_Kabuli_Chr07</i>       | 1350846                        | (A/T)       |
| 11708       | CakSNP11708    | <i>Kabuli</i>    | <i>Ca_Kabuli_Chr07</i>       | 1350947                        | (T/G)       |
| 11709       | CakSNP11709    | <i>Kabuli</i>    | <i>Ca_Kabuli_Chr07</i>       | 1414206                        | (C/A)       |
| 11710       | CakSNP11710    | <i>Kabuli</i>    | <i>Ca_Kabuli_Chr07</i>       | 1505646                        | (G/A)       |
| 11711       | CakSNP11711    | <i>Kabuli</i>    | <i>Ca_Kabuli_Chr07</i>       | 1509156                        | (G/A)       |
| 11712       | CakSNP11712    | <i>Kabuli</i>    | <i>Ca_Kabuli_Chr07</i>       | 1511252                        | (C/T)       |
| 11713       | CakSNP11713    | <i>Kabuli</i>    | <i>Ca_Kabuli_Chr07</i>       | 1585622                        | (T/C)       |
| 11714       | CakSNP11714    | <i>Kabuli</i>    | <i>Ca_Kabuli_Chr07</i>       | 1635519                        | (G/A)       |
| 11715       | CakSNP11715    | <i>Kabuli</i>    | <i>Ca_Kabuli_Chr07</i>       | 1635471                        | (G/T)       |
| 11716       | CakSNP11716    | <i>Kabuli</i>    | <i>Ca_Kabuli_Chr07</i>       | 1702033                        | (G/T)       |
| 11717       | CakSNP11717    | <i>Kabuli</i>    | <i>Ca_Kabuli_Chr07</i>       | 1702063                        | (A/G)       |
| 11718       | CakSNP11718    | <i>Kabuli</i>    | <i>Ca_Kabuli_Chr07</i>       | 1702077                        | (G/C)       |
| 11719       | CakSNP11719    | <i>Kabuli</i>    | <i>Ca_Kabuli_Chr07</i>       | 1704780                        | (T/G)       |
| 11720       | CakSNP11720    | <i>Kabuli</i>    | <i>Ca_Kabuli_Chr07</i>       | 1704802                        | (A/G)       |
| 11721       | CakSNP11721    | <i>Kabuli</i>    | <i>Ca_Kabuli_Chr07</i>       | 1704892                        | (A/G)       |
| 11722       | CakSNP11722    | <i>Kabuli</i>    | <i>Ca_Kabuli_Chr07</i>       | 1704947                        | (C/T)       |
| 11723       | CakSNP11723    | <i>Kabuli</i>    | <i>Ca_Kabuli_Chr07</i>       | 1705197                        | (A/C)       |
| 11724       | CakSNP11724    | <i>Kabuli</i>    | <i>Ca_Kabuli_Chr07</i>       | 1707283                        | (G/T)       |
| 11725       | CakSNP11725    | <i>Kabuli</i>    | <i>Ca_Kabuli_Chr07</i>       | 1707375                        | (C/G)       |
| 11726       | CakSNP11726    | <i>Kabuli</i>    | <i>Ca_Kabuli_Chr07</i>       | 1739369                        | (C/A)       |
| 11727       | CakSNP11727    | <i>Kabuli</i>    | <i>Ca_Kabuli_Chr07</i>       | 1787308                        | (T/A)       |
| 11728       | CakSNP11728    | <i>Kabuli</i>    | <i>Ca_Kabuli_Chr07</i>       | 1787417                        | (G/A)       |
| 11729       | CakSNP11729    | <i>Kabuli</i>    | <i>Ca_Kabuli_Chr07</i>       | 1946020                        | (G/A)       |
| 11730       | CakSNP11730    | <i>Kabuli</i>    | <i>Ca_Kabuli_Chr07</i>       | 1963659                        | (T/A)       |
| 11731       | CakSNP11731    | <i>Kabuli</i>    | <i>Ca_Kabuli_Chr07</i>       | 1963757                        | (A/G)       |
| 11732       | CakSNP11732    | <i>Kabuli</i>    | <i>Ca_Kabuli_Chr07</i>       | 1991642                        | (G/T)       |
| 11733       | CakSNP11733    | <i>Kabuli</i>    | <i>Ca_Kabuli_Chr07</i>       | 2012854                        | (T/A)       |
| 11734       | CakSNP11734    | <i>Kabuli</i>    | <i>Ca_Kabuli_Chr07</i>       | 2103626                        | (C/T)       |
| 11735       | CakSNP11735    | <i>Kabuli</i>    | <i>Ca_Kabuli_Chr07</i>       | 2106876                        | (C/A)       |
| 11736       | CakSNP11736    | <i>Kabuli</i>    | <i>Ca_Kabuli_Chr07</i>       | 2106917                        | (A/T)       |
| 11737       | CakSNP11737    | <i>Kabuli</i>    | <i>Ca_Kabuli_Chr07</i>       | 2146554                        | (G/A)       |

| <b>S.N.</b> | <b>SNP IDs</b> | <b>Cultivars</b> | <b>Chromosomes/scaffolds</b> | <b>Physical positions (bp)</b> | <b>SNPs</b> |
|-------------|----------------|------------------|------------------------------|--------------------------------|-------------|
| 11738       | CakSNP11738    | <i>Kabuli</i>    | <i>Ca_Kabuli_Chr07</i>       | 2167517                        | (A/C)       |
| 11739       | CakSNP11739    | <i>Kabuli</i>    | <i>Ca_Kabuli_Chr07</i>       | 2167540                        | (G/C)       |
| 11740       | CakSNP11740    | <i>Kabuli</i>    | <i>Ca_Kabuli_Chr07</i>       | 2211897                        | (G/A)       |
| 11741       | CakSNP11741    | <i>Kabuli</i>    | <i>Ca_Kabuli_Chr07</i>       | 2219764                        | (C/T)       |
| 11742       | CakSNP11742    | <i>Kabuli</i>    | <i>Ca_Kabuli_Chr07</i>       | 2230434                        | (A/G)       |
| 11743       | CakSNP11743    | <i>Kabuli</i>    | <i>Ca_Kabuli_Chr07</i>       | 2262749                        | (C/G)       |
| 11744       | CakSNP11744    | <i>Kabuli</i>    | <i>Ca_Kabuli_Chr07</i>       | 2262865                        | (A/G)       |
| 11745       | CakSNP11745    | <i>Kabuli</i>    | <i>Ca_Kabuli_Chr07</i>       | 2262843                        | (T/A)       |
| 11746       | CakSNP11746    | <i>Kabuli</i>    | <i>Ca_Kabuli_Chr07</i>       | 2361064                        | (T/G)       |
| 11747       | CakSNP11747    | <i>Kabuli</i>    | <i>Ca_Kabuli_Chr07</i>       | 2387109                        | (C/T)       |
| 11748       | CakSNP11748    | <i>Kabuli</i>    | <i>Ca_Kabuli_Chr07</i>       | 2391392                        | (G/A)       |
| 11749       | CakSNP11749    | <i>Kabuli</i>    | <i>Ca_Kabuli_Chr07</i>       | 2401235                        | (T/C)       |
| 11750       | CakSNP11750    | <i>Kabuli</i>    | <i>Ca_Kabuli_Chr07</i>       | 2493033                        | (A/G)       |
| 11751       | CakSNP11751    | <i>Kabuli</i>    | <i>Ca_Kabuli_Chr07</i>       | 2538167                        | (C/G)       |
| 11752       | CakSNP11752    | <i>Kabuli</i>    | <i>Ca_Kabuli_Chr07</i>       | 2541501                        | (A/G)       |
| 11753       | CakSNP11753    | <i>Kabuli</i>    | <i>Ca_Kabuli_Chr07</i>       | 2541551                        | (G/A)       |
| 11754       | CakSNP11754    | <i>Kabuli</i>    | <i>Ca_Kabuli_Chr07</i>       | 2541653                        | (C/G)       |
| 11755       | CakSNP11755    | <i>Kabuli</i>    | <i>Ca_Kabuli_Chr07</i>       | 2545613                        | (T/C)       |
| 11756       | CakSNP11756    | <i>Kabuli</i>    | <i>Ca_Kabuli_Chr07</i>       | 2552454                        | (G/T)       |
| 11757       | CakSNP11757    | <i>Kabuli</i>    | <i>Ca_Kabuli_Chr07</i>       | 2603595                        | (C/T)       |
| 11758       | CakSNP11758    | <i>Kabuli</i>    | <i>Ca_Kabuli_Chr07</i>       | 2603633                        | (C/T)       |
| 11759       | CakSNP11759    | <i>Kabuli</i>    | <i>Ca_Kabuli_Chr07</i>       | 2603649                        | (T/C)       |
| 11760       | CakSNP11760    | <i>Kabuli</i>    | <i>Ca_Kabuli_Chr07</i>       | 2609831                        | (C/A)       |
| 11761       | CakSNP11761    | <i>Kabuli</i>    | <i>Ca_Kabuli_Chr07</i>       | 2618478                        | (C/T)       |
| 11762       | CakSNP11762    | <i>Kabuli</i>    | <i>Ca_Kabuli_Chr07</i>       | 2654442                        | (T/G)       |
| 11763       | CakSNP11763    | <i>Kabuli</i>    | <i>Ca_Kabuli_Chr07</i>       | 2654478                        | (C/T)       |
| 11764       | CakSNP11764    | <i>Kabuli</i>    | <i>Ca_Kabuli_Chr07</i>       | 2684213                        | (A/G)       |
| 11765       | CakSNP11765    | <i>Kabuli</i>    | <i>Ca_Kabuli_Chr07</i>       | 2734680                        | (A/G)       |
| 11766       | CakSNP11766    | <i>Kabuli</i>    | <i>Ca_Kabuli_Chr07</i>       | 2734625                        | (C/T)       |
| 11767       | CakSNP11767    | <i>Kabuli</i>    | <i>Ca_Kabuli_Chr07</i>       | 2745665                        | (A/C)       |
| 11768       | CakSNP11768    | <i>Kabuli</i>    | <i>Ca_Kabuli_Chr07</i>       | 2745656                        | (A/C)       |
| 11769       | CakSNP11769    | <i>Kabuli</i>    | <i>Ca_Kabuli_Chr07</i>       | 2757260                        | (C/T)       |
| 11770       | CakSNP11770    | <i>Kabuli</i>    | <i>Ca_Kabuli_Chr07</i>       | 2757255                        | (G/C)       |
| 11771       | CakSNP11771    | <i>Kabuli</i>    | <i>Ca_Kabuli_Chr07</i>       | 2757253                        | (T/G)       |
| 11772       | CakSNP11772    | <i>Kabuli</i>    | <i>Ca_Kabuli_Chr07</i>       | 2762396                        | (G/A)       |
| 11773       | CakSNP11773    | <i>Kabuli</i>    | <i>Ca_Kabuli_Chr07</i>       | 2762406                        | (C/T)       |
| 11774       | CakSNP11774    | <i>Kabuli</i>    | <i>Ca_Kabuli_Chr07</i>       | 2762423                        | (G/A)       |
| 11775       | CakSNP11775    | <i>Kabuli</i>    | <i>Ca_Kabuli_Chr07</i>       | 2832369                        | (C/T)       |
| 11776       | CakSNP11776    | <i>Kabuli</i>    | <i>Ca_Kabuli_Chr07</i>       | 2857630                        | (T/G)       |

| <b>S.N.</b> | <b>SNP IDs</b> | <b>Cultivars</b> | <b>Chromosomes/scaffolds</b> | <b>Physical positions (bp)</b> | <b>SNPs</b> |
|-------------|----------------|------------------|------------------------------|--------------------------------|-------------|
| 11777       | CakSNP11777    | <i>Kabuli</i>    | <i>Ca_Kabuli_Chr07</i>       | 2857818                        | (T/A)       |
| 11778       | CakSNP11778    | <i>Kabuli</i>    | <i>Ca_Kabuli_Chr07</i>       | 2857844                        | (C/T)       |
| 11779       | CakSNP11779    | <i>Kabuli</i>    | <i>Ca_Kabuli_Chr07</i>       | 2909641                        | (A/G)       |
| 11780       | CakSNP11780    | <i>Kabuli</i>    | <i>Ca_Kabuli_Chr07</i>       | 2915375                        | (C/G)       |
| 11781       | CakSNP11781    | <i>Kabuli</i>    | <i>Ca_Kabuli_Chr07</i>       | 2932309                        | (C/G)       |
| 11782       | CakSNP11782    | <i>Kabuli</i>    | <i>Ca_Kabuli_Chr07</i>       | 2932301                        | (C/A)       |
| 11783       | CakSNP11783    | <i>Kabuli</i>    | <i>Ca_Kabuli_Chr07</i>       | 2932377                        | (C/T)       |
| 11784       | CakSNP11784    | <i>Kabuli</i>    | <i>Ca_Kabuli_Chr07</i>       | 2956665                        | (C/T)       |
| 11785       | CakSNP11785    | <i>Kabuli</i>    | <i>Ca_Kabuli_Chr07</i>       | 2956767                        | (A/G)       |
| 11786       | CakSNP11786    | <i>Kabuli</i>    | <i>Ca_Kabuli_Chr07</i>       | 2969653                        | (A/G)       |
| 11787       | CakSNP11787    | <i>Kabuli</i>    | <i>Ca_Kabuli_Chr07</i>       | 2997261                        | (A/G)       |
| 11788       | CakSNP11788    | <i>Kabuli</i>    | <i>Ca_Kabuli_Chr07</i>       | 3023182                        | (T/C)       |
| 11789       | CakSNP11789    | <i>Kabuli</i>    | <i>Ca_Kabuli_Chr07</i>       | 3023154                        | (T/C)       |
| 11790       | CakSNP11790    | <i>Kabuli</i>    | <i>Ca_Kabuli_Chr07</i>       | 3070531                        | (A/C)       |
| 11791       | CakSNP11791    | <i>Kabuli</i>    | <i>Ca_Kabuli_Chr07</i>       | 3090898                        | (G/A)       |
| 11792       | CakSNP11792    | <i>Kabuli</i>    | <i>Ca_Kabuli_Chr07</i>       | 3093884                        | (T/A)       |
| 11793       | CakSNP11793    | <i>Kabuli</i>    | <i>Ca_Kabuli_Chr07</i>       | 3093953                        | (T/G)       |
| 11794       | CakSNP11794    | <i>Kabuli</i>    | <i>Ca_Kabuli_Chr07</i>       | 3094090                        | (G/A)       |
| 11795       | CakSNP11795    | <i>Kabuli</i>    | <i>Ca_Kabuli_Chr07</i>       | 3094087                        | (A/G)       |
| 11796       | CakSNP11796    | <i>Kabuli</i>    | <i>Ca_Kabuli_Chr07</i>       | 3107197                        | (C/T)       |
| 11797       | CakSNP11797    | <i>Kabuli</i>    | <i>Ca_Kabuli_Chr07</i>       | 3107239                        | (T/A)       |
| 11798       | CakSNP11798    | <i>Kabuli</i>    | <i>Ca_Kabuli_Chr07</i>       | 3109250                        | (T/C)       |
| 11799       | CakSNP11799    | <i>Kabuli</i>    | <i>Ca_Kabuli_Chr07</i>       | 3109352                        | (T/C)       |
| 11800       | CakSNP11800    | <i>Kabuli</i>    | <i>Ca_Kabuli_Chr07</i>       | 3110316                        | (A/G)       |
| 11801       | CakSNP11801    | <i>Kabuli</i>    | <i>Ca_Kabuli_Chr07</i>       | 3130070                        | (A/G)       |
| 11802       | CakSNP11802    | <i>Kabuli</i>    | <i>Ca_Kabuli_Chr07</i>       | 3130069                        | (A/G)       |
| 11803       | CakSNP11803    | <i>Kabuli</i>    | <i>Ca_Kabuli_Chr07</i>       | 3143409                        | (C/T)       |
| 11804       | CakSNP11804    | <i>Kabuli</i>    | <i>Ca_Kabuli_Chr07</i>       | 3186341                        | (C/T)       |
| 11805       | CakSNP11805    | <i>Kabuli</i>    | <i>Ca_Kabuli_Chr07</i>       | 3186262                        | (T/G)       |
| 11806       | CakSNP11806    | <i>Kabuli</i>    | <i>Ca_Kabuli_Chr07</i>       | 3198197                        | (C/A)       |
| 11807       | CakSNP11807    | <i>Kabuli</i>    | <i>Ca_Kabuli_Chr07</i>       | 3198263                        | (T/C)       |
| 11808       | CakSNP11808    | <i>Kabuli</i>    | <i>Ca_Kabuli_Chr07</i>       | 3217916                        | (T/G)       |
| 11809       | CakSNP11809    | <i>Kabuli</i>    | <i>Ca_Kabuli_Chr07</i>       | 3236150                        | (A/C)       |
| 11810       | CakSNP11810    | <i>Kabuli</i>    | <i>Ca_Kabuli_Chr07</i>       | 3265823                        | (A/G)       |
| 11811       | CakSNP11811    | <i>Kabuli</i>    | <i>Ca_Kabuli_Chr07</i>       | 3297560                        | (G/A)       |
| 11812       | CakSNP11812    | <i>Kabuli</i>    | <i>Ca_Kabuli_Chr07</i>       | 3297677                        | (G/T)       |
| 11813       | CakSNP11813    | <i>Kabuli</i>    | <i>Ca_Kabuli_Chr07</i>       | 3315157                        | (A/G)       |
| 11814       | CakSNP11814    | <i>Kabuli</i>    | <i>Ca_Kabuli_Chr07</i>       | 3351037                        | (G/T)       |
| 11815       | CakSNP11815    | <i>Kabuli</i>    | <i>Ca_Kabuli_Chr07</i>       | 3353095                        | (C/T)       |



| <b>S.N.</b> | <b>SNP IDs</b> | <b>Cultivars</b> | <b>Chromosomes/scaffolds</b> | <b>Physical positions (bp)</b> | <b>SNPs</b> |
|-------------|----------------|------------------|------------------------------|--------------------------------|-------------|
| 11816       | CakSNP11816    | <i>Kabuli</i>    | <i>Ca_Kabuli_Chr07</i>       | 3355627                        | (A/G)       |
| 11817       | CakSNP11817    | <i>Kabuli</i>    | <i>Ca_Kabuli_Chr07</i>       | 3355763                        | (A/G)       |
| 11818       | CakSNP11818    | <i>Kabuli</i>    | <i>Ca_Kabuli_Chr07</i>       | 3356399                        | (G/A)       |
| 11819       | CakSNP11819    | <i>Kabuli</i>    | <i>Ca_Kabuli_Chr07</i>       | 3357452                        | (G/A)       |
| 11820       | CakSNP11820    | <i>Kabuli</i>    | <i>Ca_Kabuli_Chr07</i>       | 3430492                        | (A/T)       |
| 11821       | CakSNP11821    | <i>Kabuli</i>    | <i>Ca_Kabuli_Chr07</i>       | 3430479                        | (G/A)       |
| 11822       | CakSNP11822    | <i>Kabuli</i>    | <i>Ca_Kabuli_Chr07</i>       | 3445031                        | (T/C)       |
| 11823       | CakSNP11823    | <i>Kabuli</i>    | <i>Ca_Kabuli_Chr07</i>       | 3476546                        | (T/C)       |
| 11824       | CakSNP11824    | <i>Kabuli</i>    | <i>Ca_Kabuli_Chr07</i>       | 3504900                        | (G/A)       |
| 11825       | CakSNP11825    | <i>Kabuli</i>    | <i>Ca_Kabuli_Chr07</i>       | 3505012                        | (A/C)       |
| 11826       | CakSNP11826    | <i>Kabuli</i>    | <i>Ca_Kabuli_Chr07</i>       | 3518048                        | (G/A)       |
| 11827       | CakSNP11827    | <i>Kabuli</i>    | <i>Ca_Kabuli_Chr07</i>       | 3519510                        | (A/G)       |
| 11828       | CakSNP11828    | <i>Kabuli</i>    | <i>Ca_Kabuli_Chr07</i>       | 3519701                        | (A/C)       |
| 11829       | CakSNP11829    | <i>Kabuli</i>    | <i>Ca_Kabuli_Chr07</i>       | 3521150                        | (A/G)       |
| 11830       | CakSNP11830    | <i>Kabuli</i>    | <i>Ca_Kabuli_Chr07</i>       | 3521257                        | (G/A)       |
| 11831       | CakSNP11831    | <i>Kabuli</i>    | <i>Ca_Kabuli_Chr07</i>       | 3521192                        | (C/A)       |
| 11832       | CakSNP11832    | <i>Kabuli</i>    | <i>Ca_Kabuli_Chr07</i>       | 3536194                        | (C/T)       |
| 11833       | CakSNP11833    | <i>Kabuli</i>    | <i>Ca_Kabuli_Chr07</i>       | 3536233                        | (T/C)       |
| 11834       | CakSNP11834    | <i>Kabuli</i>    | <i>Ca_Kabuli_Chr07</i>       | 3543765                        | (A/G)       |
| 11835       | CakSNP11835    | <i>Kabuli</i>    | <i>Ca_Kabuli_Chr07</i>       | 3543768                        | (T/C)       |
| 11836       | CakSNP11836    | <i>Kabuli</i>    | <i>Ca_Kabuli_Chr07</i>       | 3557570                        | (C/T)       |
| 11837       | CakSNP11837    | <i>Kabuli</i>    | <i>Ca_Kabuli_Chr07</i>       | 3560182                        | (G/A)       |
| 11838       | CakSNP11838    | <i>Kabuli</i>    | <i>Ca_Kabuli_Chr07</i>       | 3560250                        | (C/T)       |
| 11839       | CakSNP11839    | <i>Kabuli</i>    | <i>Ca_Kabuli_Chr07</i>       | 3572963                        | (T/C)       |
| 11840       | CakSNP11840    | <i>Kabuli</i>    | <i>Ca_Kabuli_Chr07</i>       | 3581123                        | (G/A)       |
| 11841       | CakSNP11841    | <i>Kabuli</i>    | <i>Ca_Kabuli_Chr07</i>       | 3600826                        | (C/T)       |
| 11842       | CakSNP11842    | <i>Kabuli</i>    | <i>Ca_Kabuli_Chr07</i>       | 3600833                        | (T/G)       |
| 11843       | CakSNP11843    | <i>Kabuli</i>    | <i>Ca_Kabuli_Chr07</i>       | 3600866                        | (T/C)       |
| 11844       | CakSNP11844    | <i>Kabuli</i>    | <i>Ca_Kabuli_Chr07</i>       | 3600867                        | (C/T)       |
| 11845       | CakSNP11845    | <i>Kabuli</i>    | <i>Ca_Kabuli_Chr07</i>       | 3600987                        | (A/C)       |
| 11846       | CakSNP11846    | <i>Kabuli</i>    | <i>Ca_Kabuli_Chr07</i>       | 3628086                        | (G/A)       |
| 11847       | CakSNP11847    | <i>Kabuli</i>    | <i>Ca_Kabuli_Chr07</i>       | 3635307                        | (G/A)       |
| 11848       | CakSNP11848    | <i>Kabuli</i>    | <i>Ca_Kabuli_Chr07</i>       | 3635309                        | (C/T)       |
| 11849       | CakSNP11849    | <i>Kabuli</i>    | <i>Ca_Kabuli_Chr07</i>       | 3635318                        | (T/A)       |
| 11850       | CakSNP11850    | <i>Kabuli</i>    | <i>Ca_Kabuli_Chr07</i>       | 3635325                        | (T/C)       |
| 11851       | CakSNP11851    | <i>Kabuli</i>    | <i>Ca_Kabuli_Chr07</i>       | 3635369                        | (G/T)       |
| 11852       | CakSNP11852    | <i>Kabuli</i>    | <i>Ca_Kabuli_Chr07</i>       | 3651051                        | (T/C)       |
| 11853       | CakSNP11853    | <i>Kabuli</i>    | <i>Ca_Kabuli_Chr07</i>       | 3655451                        | (G/T)       |
| 11854       | CakSNP11854    | <i>Kabuli</i>    | <i>Ca_Kabuli_Chr07</i>       | 3665651                        | (G/C)       |

| <b>S.N.</b> | <b>SNP IDs</b> | <b>Cultivars</b> | <b>Chromosomes/scaffolds</b> | <b>Physical positions (bp)</b> | <b>SNPs</b> |
|-------------|----------------|------------------|------------------------------|--------------------------------|-------------|
| 11855       | CakSNP11855    | <i>Kabuli</i>    | <i>Ca_Kabuli_Chr07</i>       | 3672192                        | (T/C)       |
| 11856       | CakSNP11856    | <i>Kabuli</i>    | <i>Ca_Kabuli_Chr07</i>       | 3672236                        | (G/A)       |
| 11857       | CakSNP11857    | <i>Kabuli</i>    | <i>Ca_Kabuli_Chr07</i>       | 3734030                        | (T/A)       |
| 11858       | CakSNP11858    | <i>Kabuli</i>    | <i>Ca_Kabuli_Chr07</i>       | 3738769                        | (T/C)       |
| 11859       | CakSNP11859    | <i>Kabuli</i>    | <i>Ca_Kabuli_Chr07</i>       | 3754778                        | (G/A)       |
| 11860       | CakSNP11860    | <i>Kabuli</i>    | <i>Ca_Kabuli_Chr07</i>       | 3754743                        | (G/C)       |
| 11861       | CakSNP11861    | <i>Kabuli</i>    | <i>Ca_Kabuli_Chr07</i>       | 3795825                        | (T/C)       |
| 11862       | CakSNP11862    | <i>Kabuli</i>    | <i>Ca_Kabuli_Chr07</i>       | 3795798                        | (G/A)       |
| 11863       | CakSNP11863    | <i>Kabuli</i>    | <i>Ca_Kabuli_Chr07</i>       | 3795776                        | (C/A)       |
| 11864       | CakSNP11864    | <i>Kabuli</i>    | <i>Ca_Kabuli_Chr07</i>       | 3796826                        | (A/G)       |
| 11865       | CakSNP11865    | <i>Kabuli</i>    | <i>Ca_Kabuli_Chr07</i>       | 3796894                        | (A/G)       |
| 11866       | CakSNP11866    | <i>Kabuli</i>    | <i>Ca_Kabuli_Chr07</i>       | 3802188                        | (T/A)       |
| 11867       | CakSNP11867    | <i>Kabuli</i>    | <i>Ca_Kabuli_Chr07</i>       | 3814791                        | (A/G)       |
| 11868       | CakSNP11868    | <i>Kabuli</i>    | <i>Ca_Kabuli_Chr07</i>       | 3817087                        | (C/T)       |
| 11869       | CakSNP11869    | <i>Kabuli</i>    | <i>Ca_Kabuli_Chr07</i>       | 3817733                        | (T/G)       |
| 11870       | CakSNP11870    | <i>Kabuli</i>    | <i>Ca_Kabuli_Chr07</i>       | 3817740                        | (G/T)       |
| 11871       | CakSNP11871    | <i>Kabuli</i>    | <i>Ca_Kabuli_Chr07</i>       | 3829115                        | (C/T)       |
| 11872       | CakSNP11872    | <i>Kabuli</i>    | <i>Ca_Kabuli_Chr07</i>       | 3843168                        | (A/T)       |
| 11873       | CakSNP11873    | <i>Kabuli</i>    | <i>Ca_Kabuli_Chr07</i>       | 3845953                        | (A/C)       |
| 11874       | CakSNP11874    | <i>Kabuli</i>    | <i>Ca_Kabuli_Chr07</i>       | 3845958                        | (G/A)       |
| 11875       | CakSNP11875    | <i>Kabuli</i>    | <i>Ca_Kabuli_Chr07</i>       | 3845996                        | (G/A)       |
| 11876       | CakSNP11876    | <i>Kabuli</i>    | <i>Ca_Kabuli_Chr07</i>       | 3856308                        | (C/T)       |
| 11877       | CakSNP11877    | <i>Kabuli</i>    | <i>Ca_Kabuli_Chr07</i>       | 3859451                        | (G/A)       |
| 11878       | CakSNP11878    | <i>Kabuli</i>    | <i>Ca_Kabuli_Chr07</i>       | 3916849                        | (A/C)       |
| 11879       | CakSNP11879    | <i>Kabuli</i>    | <i>Ca_Kabuli_Chr07</i>       | 3924920                        | (T/C)       |
| 11880       | CakSNP11880    | <i>Kabuli</i>    | <i>Ca_Kabuli_Chr07</i>       | 3946712                        | (G/A)       |
| 11881       | CakSNP11881    | <i>Kabuli</i>    | <i>Ca_Kabuli_Chr07</i>       | 3982635                        | (T/G)       |
| 11882       | CakSNP11882    | <i>Kabuli</i>    | <i>Ca_Kabuli_Chr07</i>       | 3982622                        | (G/A)       |
| 11883       | CakSNP11883    | <i>Kabuli</i>    | <i>Ca_Kabuli_Chr07</i>       | 4017780                        | (C/T)       |
| 11884       | CakSNP11884    | <i>Kabuli</i>    | <i>Ca_Kabuli_Chr07</i>       | 4017851                        | (T/C)       |
| 11885       | CakSNP11885    | <i>Kabuli</i>    | <i>Ca_Kabuli_Chr07</i>       | 4039347                        | (C/A)       |
| 11886       | CakSNP11886    | <i>Kabuli</i>    | <i>Ca_Kabuli_Chr07</i>       | 4039300                        | (T/C)       |
| 11887       | CakSNP11887    | <i>Kabuli</i>    | <i>Ca_Kabuli_Chr07</i>       | 4039290                        | (A/G)       |
| 11888       | CakSNP11888    | <i>Kabuli</i>    | <i>Ca_Kabuli_Chr07</i>       | 4042123                        | (T/G)       |
| 11889       | CakSNP11889    | <i>Kabuli</i>    | <i>Ca_Kabuli_Chr07</i>       | 4095293                        | (A/G)       |
| 11890       | CakSNP11890    | <i>Kabuli</i>    | <i>Ca_Kabuli_Chr07</i>       | 4168933                        | (G/T)       |
| 11891       | CakSNP11891    | <i>Kabuli</i>    | <i>Ca_Kabuli_Chr07</i>       | 4194809                        | (T/A)       |
| 11892       | CakSNP11892    | <i>Kabuli</i>    | <i>Ca_Kabuli_Chr07</i>       | 4194890                        | (C/A)       |
| 11893       | CakSNP11893    | <i>Kabuli</i>    | <i>Ca_Kabuli_Chr07</i>       | 4194891                        | (C/G)       |

| <b>S.N.</b> | <b>SNP IDs</b> | <b>Cultivars</b> | <b>Chromosomes/scaffolds</b> | <b>Physical positions (bp)</b> | <b>SNPs</b> |
|-------------|----------------|------------------|------------------------------|--------------------------------|-------------|
| 11894       | CakSNP11894    | <i>Kabuli</i>    | <i>Ca_Kabuli_Chr07</i>       | 4198812                        | (A/C)       |
| 11895       | CakSNP11895    | <i>Kabuli</i>    | <i>Ca_Kabuli_Chr07</i>       | 4209425                        | (C/T)       |
| 11896       | CakSNP11896    | <i>Kabuli</i>    | <i>Ca_Kabuli_Chr07</i>       | 4209465                        | (A/C)       |
| 11897       | CakSNP11897    | <i>Kabuli</i>    | <i>Ca_Kabuli_Chr07</i>       | 4225314                        | (T/C)       |
| 11898       | CakSNP11898    | <i>Kabuli</i>    | <i>Ca_Kabuli_Chr07</i>       | 4256529                        | (G/A)       |
| 11899       | CakSNP11899    | <i>Kabuli</i>    | <i>Ca_Kabuli_Chr07</i>       | 4256703                        | (C/G)       |
| 11900       | CakSNP11900    | <i>Kabuli</i>    | <i>Ca_Kabuli_Chr07</i>       | 4257726                        | (A/T)       |
| 11901       | CakSNP11901    | <i>Kabuli</i>    | <i>Ca_Kabuli_Chr07</i>       | 4257727                        | (T/A)       |
| 11902       | CakSNP11902    | <i>Kabuli</i>    | <i>Ca_Kabuli_Chr07</i>       | 4257838                        | (C/T)       |
| 11903       | CakSNP11903    | <i>Kabuli</i>    | <i>Ca_Kabuli_Chr07</i>       | 4257830                        | (G/T)       |
| 11904       | CakSNP11904    | <i>Kabuli</i>    | <i>Ca_Kabuli_Chr07</i>       | 4257799                        | (G/A)       |
| 11905       | CakSNP11905    | <i>Kabuli</i>    | <i>Ca_Kabuli_Chr07</i>       | 4289975                        | (G/A)       |
| 11906       | CakSNP11906    | <i>Kabuli</i>    | <i>Ca_Kabuli_Chr07</i>       | 4300525                        | (C/T)       |
| 11907       | CakSNP11907    | <i>Kabuli</i>    | <i>Ca_Kabuli_Chr07</i>       | 4300650                        | (T/C)       |
| 11908       | CakSNP11908    | <i>Kabuli</i>    | <i>Ca_Kabuli_Chr07</i>       | 4300645                        | (C/T)       |
| 11909       | CakSNP11909    | <i>Kabuli</i>    | <i>Ca_Kabuli_Chr07</i>       | 4300592                        | (G/A)       |
| 11910       | CakSNP11910    | <i>Kabuli</i>    | <i>Ca_Kabuli_Chr07</i>       | 4300584                        | (C/T)       |
| 11911       | CakSNP11911    | <i>Kabuli</i>    | <i>Ca_Kabuli_Chr07</i>       | 4305424                        | (G/T)       |
| 11912       | CakSNP11912    | <i>Kabuli</i>    | <i>Ca_Kabuli_Chr07</i>       | 4431138                        | (A/G)       |
| 11913       | CakSNP11913    | <i>Kabuli</i>    | <i>Ca_Kabuli_Chr07</i>       | 4431253                        | (T/C)       |
| 11914       | CakSNP11914    | <i>Kabuli</i>    | <i>Ca_Kabuli_Chr07</i>       | 4438929                        | (A/G)       |
| 11915       | CakSNP11915    | <i>Kabuli</i>    | <i>Ca_Kabuli_Chr07</i>       | 4455045                        | (T/C)       |
| 11916       | CakSNP11916    | <i>Kabuli</i>    | <i>Ca_Kabuli_Chr07</i>       | 4461990                        | (A/C)       |
| 11917       | CakSNP11917    | <i>Kabuli</i>    | <i>Ca_Kabuli_Chr07</i>       | 4470285                        | (C/G)       |
| 11918       | CakSNP11918    | <i>Kabuli</i>    | <i>Ca_Kabuli_Chr07</i>       | 4490514                        | (G/A)       |
| 11919       | CakSNP11919    | <i>Kabuli</i>    | <i>Ca_Kabuli_Chr07</i>       | 4490964                        | (G/T)       |
| 11920       | CakSNP11920    | <i>Kabuli</i>    | <i>Ca_Kabuli_Chr07</i>       | 4490966                        | (A/G)       |
| 11921       | CakSNP11921    | <i>Kabuli</i>    | <i>Ca_Kabuli_Chr07</i>       | 4497784                        | (C/T)       |
| 11922       | CakSNP11922    | <i>Kabuli</i>    | <i>Ca_Kabuli_Chr07</i>       | 4520606                        | (T/C)       |
| 11923       | CakSNP11923    | <i>Kabuli</i>    | <i>Ca_Kabuli_Chr07</i>       | 4525645                        | (A/G)       |
| 11924       | CakSNP11924    | <i>Kabuli</i>    | <i>Ca_Kabuli_Chr07</i>       | 4552790                        | (T/C)       |
| 11925       | CakSNP11925    | <i>Kabuli</i>    | <i>Ca_Kabuli_Chr07</i>       | 4573236                        | (G/A)       |
| 11926       | CakSNP11926    | <i>Kabuli</i>    | <i>Ca_Kabuli_Chr07</i>       | 4625723                        | (C/T)       |
| 11927       | CakSNP11927    | <i>Kabuli</i>    | <i>Ca_Kabuli_Chr07</i>       | 4648569                        | (A/C)       |
| 11928       | CakSNP11928    | <i>Kabuli</i>    | <i>Ca_Kabuli_Chr07</i>       | 4648697                        | (T/A)       |
| 11929       | CakSNP11929    | <i>Kabuli</i>    | <i>Ca_Kabuli_Chr07</i>       | 4648677                        | (A/T)       |
| 11930       | CakSNP11930    | <i>Kabuli</i>    | <i>Ca_Kabuli_Chr07</i>       | 4648662                        | (G/A)       |
| 11931       | CakSNP11931    | <i>Kabuli</i>    | <i>Ca_Kabuli_Chr07</i>       | 4649287                        | (A/G)       |
| 11932       | CakSNP11932    | <i>Kabuli</i>    | <i>Ca_Kabuli_Chr07</i>       | 4651931                        | (T/C)       |

| <b>S.N.</b> | <b>SNP IDs</b> | <b>Cultivars</b> | <b>Chromosomes/scaffolds</b> | <b>Physical positions (bp)</b> | <b>SNPs</b> |
|-------------|----------------|------------------|------------------------------|--------------------------------|-------------|
| 11933       | CakSNP11933    | <i>Kabuli</i>    | <i>Ca_Kabuli_Chr07</i>       | 4652083                        | (G/A)       |
| 11934       | CakSNP11934    | <i>Kabuli</i>    | <i>Ca_Kabuli_Chr07</i>       | 4653235                        | (A/C)       |
| 11935       | CakSNP11935    | <i>Kabuli</i>    | <i>Ca_Kabuli_Chr07</i>       | 4700570                        | (C/A)       |
| 11936       | CakSNP11936    | <i>Kabuli</i>    | <i>Ca_Kabuli_Chr07</i>       | 4749212                        | (T/G)       |
| 11937       | CakSNP11937    | <i>Kabuli</i>    | <i>Ca_Kabuli_Chr07</i>       | 4752954                        | (G/C)       |
| 11938       | CakSNP11938    | <i>Kabuli</i>    | <i>Ca_Kabuli_Chr07</i>       | 4752887                        | (T/G)       |
| 11939       | CakSNP11939    | <i>Kabuli</i>    | <i>Ca_Kabuli_Chr07</i>       | 4756338                        | (G/A)       |
| 11940       | CakSNP11940    | <i>Kabuli</i>    | <i>Ca_Kabuli_Chr07</i>       | 4832993                        | (A/G)       |
| 11941       | CakSNP11941    | <i>Kabuli</i>    | <i>Ca_Kabuli_Chr07</i>       | 4834177                        | (G/T)       |
| 11942       | CakSNP11942    | <i>Kabuli</i>    | <i>Ca_Kabuli_Chr07</i>       | 4849553                        | (T/G)       |
| 11943       | CakSNP11943    | <i>Kabuli</i>    | <i>Ca_Kabuli_Chr07</i>       | 4849573                        | (T/C)       |
| 11944       | CakSNP11944    | <i>Kabuli</i>    | <i>Ca_Kabuli_Chr07</i>       | 4907315                        | (C/T)       |
| 11945       | CakSNP11945    | <i>Kabuli</i>    | <i>Ca_Kabuli_Chr07</i>       | 4926759                        | (A/T)       |
| 11946       | CakSNP11946    | <i>Kabuli</i>    | <i>Ca_Kabuli_Chr07</i>       | 4942847                        | (A/G)       |
| 11947       | CakSNP11947    | <i>Kabuli</i>    | <i>Ca_Kabuli_Chr07</i>       | 4942902                        | (G/C)       |
| 11948       | CakSNP11948    | <i>Kabuli</i>    | <i>Ca_Kabuli_Chr07</i>       | 4945935                        | (C/G)       |
| 11949       | CakSNP11949    | <i>Kabuli</i>    | <i>Ca_Kabuli_Chr07</i>       | 4981846                        | (T/C)       |
| 11950       | CakSNP11950    | <i>Kabuli</i>    | <i>Ca_Kabuli_Chr07</i>       | 5122536                        | (T/G)       |
| 11951       | CakSNP11951    | <i>Kabuli</i>    | <i>Ca_Kabuli_Chr07</i>       | 5251897                        | (G/C)       |
| 11952       | CakSNP11952    | <i>Kabuli</i>    | <i>Ca_Kabuli_Chr07</i>       | 5361558                        | (T/C)       |
| 11953       | CakSNP11953    | <i>Kabuli</i>    | <i>Ca_Kabuli_Chr07</i>       | 5383564                        | (G/C)       |
| 11954       | CakSNP11954    | <i>Kabuli</i>    | <i>Ca_Kabuli_Chr07</i>       | 5383566                        | (A/T)       |
| 11955       | CakSNP11955    | <i>Kabuli</i>    | <i>Ca_Kabuli_Chr07</i>       | 5383671                        | (G/T)       |
| 11956       | CakSNP11956    | <i>Kabuli</i>    | <i>Ca_Kabuli_Chr07</i>       | 5383695                        | (T/G)       |
| 11957       | CakSNP11957    | <i>Kabuli</i>    | <i>Ca_Kabuli_Chr07</i>       | 5383767                        | (G/A)       |
| 11958       | CakSNP11958    | <i>Kabuli</i>    | <i>Ca_Kabuli_Chr07</i>       | 5384447                        | (G/C)       |
| 11959       | CakSNP11959    | <i>Kabuli</i>    | <i>Ca_Kabuli_Chr07</i>       | 5384467                        | (C/T)       |
| 11960       | CakSNP11960    | <i>Kabuli</i>    | <i>Ca_Kabuli_Chr07</i>       | 5406524                        | (T/G)       |
| 11961       | CakSNP11961    | <i>Kabuli</i>    | <i>Ca_Kabuli_Chr07</i>       | 5416862                        | (C/G)       |
| 11962       | CakSNP11962    | <i>Kabuli</i>    | <i>Ca_Kabuli_Chr07</i>       | 5416865                        | (A/G)       |
| 11963       | CakSNP11963    | <i>Kabuli</i>    | <i>Ca_Kabuli_Chr07</i>       | 5416874                        | (C/T)       |
| 11964       | CakSNP11964    | <i>Kabuli</i>    | <i>Ca_Kabuli_Chr07</i>       | 5464941                        | (G/A)       |
| 11965       | CakSNP11965    | <i>Kabuli</i>    | <i>Ca_Kabuli_Chr07</i>       | 5464942                        | (A/G)       |
| 11966       | CakSNP11966    | <i>Kabuli</i>    | <i>Ca_Kabuli_Chr07</i>       | 5467744                        | (G/C)       |
| 11967       | CakSNP11967    | <i>Kabuli</i>    | <i>Ca_Kabuli_Chr07</i>       | 5500318                        | (C/A)       |
| 11968       | CakSNP11968    | <i>Kabuli</i>    | <i>Ca_Kabuli_Chr07</i>       | 5508162                        | (A/C)       |
| 11969       | CakSNP11969    | <i>Kabuli</i>    | <i>Ca_Kabuli_Chr07</i>       | 5520720                        | (T/G)       |
| 11970       | CakSNP11970    | <i>Kabuli</i>    | <i>Ca_Kabuli_Chr07</i>       | 5520934                        | (T/C)       |
| 11971       | CakSNP11971    | <i>Kabuli</i>    | <i>Ca_Kabuli_Chr07</i>       | 5521596                        | (T/C)       |

| <b>S.N.</b> | <b>SNP IDs</b> | <b>Cultivars</b> | <b>Chromosomes/scaffolds</b> | <b>Physical positions (bp)</b> | <b>SNPs</b> |
|-------------|----------------|------------------|------------------------------|--------------------------------|-------------|
| 11972       | CakSNP11972    | <i>Kabuli</i>    | <i>Ca_Kabuli_Chr07</i>       | 5521659                        | (G/T)       |
| 11973       | CakSNP11973    | <i>Kabuli</i>    | <i>Ca_Kabuli_Chr07</i>       | 5529577                        | (T/G)       |
| 11974       | CakSNP11974    | <i>Kabuli</i>    | <i>Ca_Kabuli_Chr07</i>       | 5529729                        | (A/G)       |
| 11975       | CakSNP11975    | <i>Kabuli</i>    | <i>Ca_Kabuli_Chr07</i>       | 5529888                        | (A/G)       |
| 11976       | CakSNP11976    | <i>Kabuli</i>    | <i>Ca_Kabuli_Chr07</i>       | 5529844                        | (C/A)       |
| 11977       | CakSNP11977    | <i>Kabuli</i>    | <i>Ca_Kabuli_Chr07</i>       | 5537851                        | (G/C)       |
| 11978       | CakSNP11978    | <i>Kabuli</i>    | <i>Ca_Kabuli_Chr07</i>       | 5537880                        | (G/T)       |
| 11979       | CakSNP11979    | <i>Kabuli</i>    | <i>Ca_Kabuli_Chr07</i>       | 5561607                        | (G/T)       |
| 11980       | CakSNP11980    | <i>Kabuli</i>    | <i>Ca_Kabuli_Chr07</i>       | 5568114                        | (C/A)       |
| 11981       | CakSNP11981    | <i>Kabuli</i>    | <i>Ca_Kabuli_Chr07</i>       | 5577467                        | (G/T)       |
| 11982       | CakSNP11982    | <i>Kabuli</i>    | <i>Ca_Kabuli_Chr07</i>       | 5577439                        | (A/G)       |
| 11983       | CakSNP11983    | <i>Kabuli</i>    | <i>Ca_Kabuli_Chr07</i>       | 5581968                        | (G/C)       |
| 11984       | CakSNP11984    | <i>Kabuli</i>    | <i>Ca_Kabuli_Chr07</i>       | 5602106                        | (T/C)       |
| 11985       | CakSNP11985    | <i>Kabuli</i>    | <i>Ca_Kabuli_Chr07</i>       | 5602144                        | (G/T)       |
| 11986       | CakSNP11986    | <i>Kabuli</i>    | <i>Ca_Kabuli_Chr07</i>       | 5605118                        | (G/A)       |
| 11987       | CakSNP11987    | <i>Kabuli</i>    | <i>Ca_Kabuli_Chr07</i>       | 5605106                        | (G/A)       |
| 11988       | CakSNP11988    | <i>Kabuli</i>    | <i>Ca_Kabuli_Chr07</i>       | 5658445                        | (G/T)       |
| 11989       | CakSNP11989    | <i>Kabuli</i>    | <i>Ca_Kabuli_Chr07</i>       | 5671902                        | (G/T)       |
| 11990       | CakSNP11990    | <i>Kabuli</i>    | <i>Ca_Kabuli_Chr07</i>       | 5672009                        | (G/C)       |
| 11991       | CakSNP11991    | <i>Kabuli</i>    | <i>Ca_Kabuli_Chr07</i>       | 5672156                        | (T/C)       |
| 11992       | CakSNP11992    | <i>Kabuli</i>    | <i>Ca_Kabuli_Chr07</i>       | 5683412                        | (T/A)       |
| 11993       | CakSNP11993    | <i>Kabuli</i>    | <i>Ca_Kabuli_Chr07</i>       | 5713977                        | (T/C)       |
| 11994       | CakSNP11994    | <i>Kabuli</i>    | <i>Ca_Kabuli_Chr07</i>       | 5735293                        | (T/A)       |
| 11995       | CakSNP11995    | <i>Kabuli</i>    | <i>Ca_Kabuli_Chr07</i>       | 5735448                        | (A/T)       |
| 11996       | CakSNP11996    | <i>Kabuli</i>    | <i>Ca_Kabuli_Chr07</i>       | 5737341                        | (C/T)       |
| 11997       | CakSNP11997    | <i>Kabuli</i>    | <i>Ca_Kabuli_Chr07</i>       | 5737305                        | (G/A)       |
| 11998       | CakSNP11998    | <i>Kabuli</i>    | <i>Ca_Kabuli_Chr07</i>       | 5756269                        | (C/T)       |
| 11999       | CakSNP11999    | <i>Kabuli</i>    | <i>Ca_Kabuli_Chr07</i>       | 5756832                        | (A/C)       |
| 12000       | CakSNP12000    | <i>Kabuli</i>    | <i>Ca_Kabuli_Chr07</i>       | 5774218                        | (T/A)       |
| 12001       | CakSNP12001    | <i>Kabuli</i>    | <i>Ca_Kabuli_Chr07</i>       | 5774219                        | (T/A)       |
| 12002       | CakSNP12002    | <i>Kabuli</i>    | <i>Ca_Kabuli_Chr07</i>       | 5774220                        | (A/T)       |
| 12003       | CakSNP12003    | <i>Kabuli</i>    | <i>Ca_Kabuli_Chr07</i>       | 5774221                        | (A/T)       |
| 12004       | CakSNP12004    | <i>Kabuli</i>    | <i>Ca_Kabuli_Chr07</i>       | 5774230                        | (G/A)       |
| 12005       | CakSNP12005    | <i>Kabuli</i>    | <i>Ca_Kabuli_Chr07</i>       | 5774257                        | (C/T)       |
| 12006       | CakSNP12006    | <i>Kabuli</i>    | <i>Ca_Kabuli_Chr07</i>       | 5774310                        | (A/G)       |
| 12007       | CakSNP12007    | <i>Kabuli</i>    | <i>Ca_Kabuli_Chr07</i>       | 5811097                        | (G/A)       |
| 12008       | CakSNP12008    | <i>Kabuli</i>    | <i>Ca_Kabuli_Chr07</i>       | 5811060                        | (T/C)       |
| 12009       | CakSNP12009    | <i>Kabuli</i>    | <i>Ca_Kabuli_Chr07</i>       | 5811044                        | (T/A)       |
| 12010       | CakSNP12010    | <i>Kabuli</i>    | <i>Ca_Kabuli_Chr07</i>       | 5836421                        | (A/T)       |

| <b>S.N.</b> | <b>SNP IDs</b> | <b>Cultivars</b> | <b>Chromosomes/scaffolds</b> | <b>Physical positions (bp)</b> | <b>SNPs</b> |
|-------------|----------------|------------------|------------------------------|--------------------------------|-------------|
| 12011       | CakSNP12011    | <i>Kabuli</i>    | <i>Ca_Kabuli_Chr07</i>       | 5846477                        | (A/G)       |
| 12012       | CakSNP12012    | <i>Kabuli</i>    | <i>Ca_Kabuli_Chr07</i>       | 5849936                        | (C/T)       |
| 12013       | CakSNP12013    | <i>Kabuli</i>    | <i>Ca_Kabuli_Chr07</i>       | 5849904                        | (C/A)       |
| 12014       | CakSNP12014    | <i>Kabuli</i>    | <i>Ca_Kabuli_Chr07</i>       | 5850058                        | (T/C)       |
| 12015       | CakSNP12015    | <i>Kabuli</i>    | <i>Ca_Kabuli_Chr07</i>       | 5854598                        | (C/T)       |
| 12016       | CakSNP12016    | <i>Kabuli</i>    | <i>Ca_Kabuli_Chr07</i>       | 5929009                        | (C/G)       |
| 12017       | CakSNP12017    | <i>Kabuli</i>    | <i>Ca_Kabuli_Chr07</i>       | 5946113                        | (G/A)       |
| 12018       | CakSNP12018    | <i>Kabuli</i>    | <i>Ca_Kabuli_Chr07</i>       | 5950352                        | (T/A)       |
| 12019       | CakSNP12019    | <i>Kabuli</i>    | <i>Ca_Kabuli_Chr07</i>       | 5950492                        | (T/C)       |
| 12020       | CakSNP12020    | <i>Kabuli</i>    | <i>Ca_Kabuli_Chr07</i>       | 5957696                        | (T/C)       |
| 12021       | CakSNP12021    | <i>Kabuli</i>    | <i>Ca_Kabuli_Chr07</i>       | 5963611                        | (C/G)       |
| 12022       | CakSNP12022    | <i>Kabuli</i>    | <i>Ca_Kabuli_Chr07</i>       | 5963609                        | (C/A)       |
| 12023       | CakSNP12023    | <i>Kabuli</i>    | <i>Ca_Kabuli_Chr07</i>       | 6012561                        | (A/C)       |
| 12024       | CakSNP12024    | <i>Kabuli</i>    | <i>Ca_Kabuli_Chr07</i>       | 6012611                        | (A/C)       |
| 12025       | CakSNP12025    | <i>Kabuli</i>    | <i>Ca_Kabuli_Chr07</i>       | 6029991                        | (G/A)       |
| 12026       | CakSNP12026    | <i>Kabuli</i>    | <i>Ca_Kabuli_Chr07</i>       | 6029990                        | (C/G)       |
| 12027       | CakSNP12027    | <i>Kabuli</i>    | <i>Ca_Kabuli_Chr07</i>       | 6066322                        | (G/A)       |
| 12028       | CakSNP12028    | <i>Kabuli</i>    | <i>Ca_Kabuli_Chr07</i>       | 6074408                        | (T/A)       |
| 12029       | CakSNP12029    | <i>Kabuli</i>    | <i>Ca_Kabuli_Chr07</i>       | 6075124                        | (T/G)       |
| 12030       | CakSNP12030    | <i>Kabuli</i>    | <i>Ca_Kabuli_Chr07</i>       | 6075218                        | (C/G)       |
| 12031       | CakSNP12031    | <i>Kabuli</i>    | <i>Ca_Kabuli_Chr07</i>       | 6096238                        | (C/A)       |
| 12032       | CakSNP12032    | <i>Kabuli</i>    | <i>Ca_Kabuli_Chr07</i>       | 6096237                        | (C/G)       |
| 12033       | CakSNP12033    | <i>Kabuli</i>    | <i>Ca_Kabuli_Chr07</i>       | 6110019                        | (T/C)       |
| 12034       | CakSNP12034    | <i>Kabuli</i>    | <i>Ca_Kabuli_Chr07</i>       | 6132021                        | (G/A)       |
| 12035       | CakSNP12035    | <i>Kabuli</i>    | <i>Ca_Kabuli_Chr07</i>       | 6232777                        | (T/C)       |
| 12036       | CakSNP12036    | <i>Kabuli</i>    | <i>Ca_Kabuli_Chr07</i>       | 6282979                        | (C/A)       |
| 12037       | CakSNP12037    | <i>Kabuli</i>    | <i>Ca_Kabuli_Chr07</i>       | 6282974                        | (T/A)       |
| 12038       | CakSNP12038    | <i>Kabuli</i>    | <i>Ca_Kabuli_Chr07</i>       | 6282949                        | (T/A)       |
| 12039       | CakSNP12039    | <i>Kabuli</i>    | <i>Ca_Kabuli_Chr07</i>       | 6299248                        | (A/G)       |
| 12040       | CakSNP12040    | <i>Kabuli</i>    | <i>Ca_Kabuli_Chr07</i>       | 6299249                        | (C/G)       |
| 12041       | CakSNP12041    | <i>Kabuli</i>    | <i>Ca_Kabuli_Chr07</i>       | 6330237                        | (A/T)       |
| 12042       | CakSNP12042    | <i>Kabuli</i>    | <i>Ca_Kabuli_Chr07</i>       | 6340051                        | (A/G)       |
| 12043       | CakSNP12043    | <i>Kabuli</i>    | <i>Ca_Kabuli_Chr07</i>       | 6340064                        | (C/G)       |
| 12044       | CakSNP12044    | <i>Kabuli</i>    | <i>Ca_Kabuli_Chr07</i>       | 6340111                        | (C/G)       |
| 12045       | CakSNP12045    | <i>Kabuli</i>    | <i>Ca_Kabuli_Chr07</i>       | 6340113                        | (G/A)       |
| 12046       | CakSNP12046    | <i>Kabuli</i>    | <i>Ca_Kabuli_Chr07</i>       | 6340167                        | (T/A)       |
| 12047       | CakSNP12047    | <i>Kabuli</i>    | <i>Ca_Kabuli_Chr07</i>       | 6340216                        | (T/C)       |
| 12048       | CakSNP12048    | <i>Kabuli</i>    | <i>Ca_Kabuli_Chr07</i>       | 6372037                        | (A/G)       |
| 12049       | CakSNP12049    | <i>Kabuli</i>    | <i>Ca_Kabuli_Chr07</i>       | 6393366                        | (G/A)       |

| <b>S.N.</b> | <b>SNP IDs</b> | <b>Cultivars</b> | <b>Chromosomes/scaffolds</b> | <b>Physical positions (bp)</b> | <b>SNPs</b> |
|-------------|----------------|------------------|------------------------------|--------------------------------|-------------|
| 12050       | CakSNP12050    | <i>Kabuli</i>    | <i>Ca_Kabuli_Chr07</i>       | 6430396                        | (T/A)       |
| 12051       | CakSNP12051    | <i>Kabuli</i>    | <i>Ca_Kabuli_Chr07</i>       | 6433480                        | (C/G)       |
| 12052       | CakSNP12052    | <i>Kabuli</i>    | <i>Ca_Kabuli_Chr07</i>       | 6467903                        | (C/T)       |
| 12053       | CakSNP12053    | <i>Kabuli</i>    | <i>Ca_Kabuli_Chr07</i>       | 6540624                        | (A/G)       |
| 12054       | CakSNP12054    | <i>Kabuli</i>    | <i>Ca_Kabuli_Chr07</i>       | 6540602                        | (G/A)       |
| 12055       | CakSNP12055    | <i>Kabuli</i>    | <i>Ca_Kabuli_Chr07</i>       | 6540601                        | (G/C)       |
| 12056       | CakSNP12056    | <i>Kabuli</i>    | <i>Ca_Kabuli_Chr07</i>       | 6566322                        | (T/C)       |
| 12057       | CakSNP12057    | <i>Kabuli</i>    | <i>Ca_Kabuli_Chr07</i>       | 6654718                        | (C/T)       |
| 12058       | CakSNP12058    | <i>Kabuli</i>    | <i>Ca_Kabuli_Chr07</i>       | 6681050                        | (C/T)       |
| 12059       | CakSNP12059    | <i>Kabuli</i>    | <i>Ca_Kabuli_Chr07</i>       | 6682456                        | (T/A)       |
| 12060       | CakSNP12060    | <i>Kabuli</i>    | <i>Ca_Kabuli_Chr07</i>       | 6682454                        | (A/G)       |
| 12061       | CakSNP12061    | <i>Kabuli</i>    | <i>Ca_Kabuli_Chr07</i>       | 6682453                        | (G/T)       |
| 12062       | CakSNP12062    | <i>Kabuli</i>    | <i>Ca_Kabuli_Chr07</i>       | 6682448                        | (T/C)       |
| 12063       | CakSNP12063    | <i>Kabuli</i>    | <i>Ca_Kabuli_Chr07</i>       | 6682443                        | (C/T)       |
| 12064       | CakSNP12064    | <i>Kabuli</i>    | <i>Ca_Kabuli_Chr07</i>       | 6682439                        | (T/A)       |
| 12065       | CakSNP12065    | <i>Kabuli</i>    | <i>Ca_Kabuli_Chr07</i>       | 6682455                        | (G/T)       |
| 12066       | CakSNP12066    | <i>Kabuli</i>    | <i>Ca_Kabuli_Chr07</i>       | 6703759                        | (C/T)       |
| 12067       | CakSNP12067    | <i>Kabuli</i>    | <i>Ca_Kabuli_Chr07</i>       | 6703849                        | (G/T)       |
| 12068       | CakSNP12068    | <i>Kabuli</i>    | <i>Ca_Kabuli_Chr07</i>       | 6767204                        | (G/T)       |
| 12069       | CakSNP12069    | <i>Kabuli</i>    | <i>Ca_Kabuli_Chr07</i>       | 6769694                        | (T/G)       |
| 12070       | CakSNP12070    | <i>Kabuli</i>    | <i>Ca_Kabuli_Chr07</i>       | 6792352                        | (T/C)       |
| 12071       | CakSNP12071    | <i>Kabuli</i>    | <i>Ca_Kabuli_Chr07</i>       | 6792606                        | (T/G)       |
| 12072       | CakSNP12072    | <i>Kabuli</i>    | <i>Ca_Kabuli_Chr07</i>       | 6807817                        | (A/C)       |
| 12073       | CakSNP12073    | <i>Kabuli</i>    | <i>Ca_Kabuli_Chr07</i>       | 6814954                        | (G/T)       |
| 12074       | CakSNP12074    | <i>Kabuli</i>    | <i>Ca_Kabuli_Chr07</i>       | 6815151                        | (G/T)       |
| 12075       | CakSNP12075    | <i>Kabuli</i>    | <i>Ca_Kabuli_Chr07</i>       | 6815113                        | (T/C)       |
| 12076       | CakSNP12076    | <i>Kabuli</i>    | <i>Ca_Kabuli_Chr07</i>       | 6859511                        | (C/G)       |
| 12077       | CakSNP12077    | <i>Kabuli</i>    | <i>Ca_Kabuli_Chr07</i>       | 6904686                        | (G/C)       |
| 12078       | CakSNP12078    | <i>Kabuli</i>    | <i>Ca_Kabuli_Chr07</i>       | 7026448                        | (C/T)       |
| 12079       | CakSNP12079    | <i>Kabuli</i>    | <i>Ca_Kabuli_Chr07</i>       | 7026516                        | (T/C)       |
| 12080       | CakSNP12080    | <i>Kabuli</i>    | <i>Ca_Kabuli_Chr07</i>       | 7026500                        | (T/A)       |
| 12081       | CakSNP12081    | <i>Kabuli</i>    | <i>Ca_Kabuli_Chr07</i>       | 7072853                        | (G/A)       |
| 12082       | CakSNP12082    | <i>Kabuli</i>    | <i>Ca_Kabuli_Chr07</i>       | 7126974                        | (T/C)       |
| 12083       | CakSNP12083    | <i>Kabuli</i>    | <i>Ca_Kabuli_Chr07</i>       | 7126979                        | (C/G)       |
| 12084       | CakSNP12084    | <i>Kabuli</i>    | <i>Ca_Kabuli_Chr07</i>       | 7127030                        | (G/A)       |
| 12085       | CakSNP12085    | <i>Kabuli</i>    | <i>Ca_Kabuli_Chr07</i>       | 7146159                        | (C/G)       |
| 12086       | CakSNP12086    | <i>Kabuli</i>    | <i>Ca_Kabuli_Chr07</i>       | 7147557                        | (A/G)       |
| 12087       | CakSNP12087    | <i>Kabuli</i>    | <i>Ca_Kabuli_Chr07</i>       | 7234422                        | (T/G)       |
| 12088       | CakSNP12088    | <i>Kabuli</i>    | <i>Ca_Kabuli_Chr07</i>       | 7234507                        | (T/C)       |

| <b>S.N.</b> | <b>SNP IDs</b> | <b>Cultivars</b> | <b>Chromosomes/scaffolds</b> | <b>Physical positions (bp)</b> | <b>SNPs</b> |
|-------------|----------------|------------------|------------------------------|--------------------------------|-------------|
| 12089       | CakSNP12089    | <i>Kabuli</i>    | <i>Ca_Kabuli_Chr07</i>       | 7234484                        | (G/A)       |
| 12090       | CakSNP12090    | <i>Kabuli</i>    | <i>Ca_Kabuli_Chr07</i>       | 7234430                        | (C/T)       |
| 12091       | CakSNP12091    | <i>Kabuli</i>    | <i>Ca_Kabuli_Chr07</i>       | 7261971                        | (C/T)       |
| 12092       | CakSNP12092    | <i>Kabuli</i>    | <i>Ca_Kabuli_Chr07</i>       | 7261941                        | (T/C)       |
| 12093       | CakSNP12093    | <i>Kabuli</i>    | <i>Ca_Kabuli_Chr07</i>       | 7265386                        | (T/A)       |
| 12094       | CakSNP12094    | <i>Kabuli</i>    | <i>Ca_Kabuli_Chr07</i>       | 7277353                        | (G/A)       |
| 12095       | CakSNP12095    | <i>Kabuli</i>    | <i>Ca_Kabuli_Chr07</i>       | 7304614                        | (T/G)       |
| 12096       | CakSNP12096    | <i>Kabuli</i>    | <i>Ca_Kabuli_Chr07</i>       | 7304617                        | (T/G)       |
| 12097       | CakSNP12097    | <i>Kabuli</i>    | <i>Ca_Kabuli_Chr07</i>       | 7423419                        | (G/A)       |
| 12098       | CakSNP12098    | <i>Kabuli</i>    | <i>Ca_Kabuli_Chr07</i>       | 7433827                        | (A/T)       |
| 12099       | CakSNP12099    | <i>Kabuli</i>    | <i>Ca_Kabuli_Chr07</i>       | 7449489                        | (T/C)       |
| 12100       | CakSNP12100    | <i>Kabuli</i>    | <i>Ca_Kabuli_Chr07</i>       | 7451931                        | (G/C)       |
| 12101       | CakSNP12101    | <i>Kabuli</i>    | <i>Ca_Kabuli_Chr07</i>       | 7491960                        | (G/A)       |
| 12102       | CakSNP12102    | <i>Kabuli</i>    | <i>Ca_Kabuli_Chr07</i>       | 7498598                        | (C/T)       |
| 12103       | CakSNP12103    | <i>Kabuli</i>    | <i>Ca_Kabuli_Chr07</i>       | 7544142                        | (A/G)       |
| 12104       | CakSNP12104    | <i>Kabuli</i>    | <i>Ca_Kabuli_Chr07</i>       | 7573889                        | (C/G)       |
| 12105       | CakSNP12105    | <i>Kabuli</i>    | <i>Ca_Kabuli_Chr07</i>       | 7576668                        | (A/C)       |
| 12106       | CakSNP12106    | <i>Kabuli</i>    | <i>Ca_Kabuli_Chr07</i>       | 7580158                        | (T/C)       |
| 12107       | CakSNP12107    | <i>Kabuli</i>    | <i>Ca_Kabuli_Chr07</i>       | 7580147                        | (C/A)       |
| 12108       | CakSNP12108    | <i>Kabuli</i>    | <i>Ca_Kabuli_Chr07</i>       | 7580118                        | (G/A)       |
| 12109       | CakSNP12109    | <i>Kabuli</i>    | <i>Ca_Kabuli_Chr07</i>       | 7612046                        | (A/T)       |
| 12110       | CakSNP12110    | <i>Kabuli</i>    | <i>Ca_Kabuli_Chr07</i>       | 7624697                        | (G/A)       |
| 12111       | CakSNP12111    | <i>Kabuli</i>    | <i>Ca_Kabuli_Chr07</i>       | 7625226                        | (G/T)       |
| 12112       | CakSNP12112    | <i>Kabuli</i>    | <i>Ca_Kabuli_Chr07</i>       | 7625277                        | (A/T)       |
| 12113       | CakSNP12113    | <i>Kabuli</i>    | <i>Ca_Kabuli_Chr07</i>       | 7625901                        | (A/C)       |
| 12114       | CakSNP12114    | <i>Kabuli</i>    | <i>Ca_Kabuli_Chr07</i>       | 7625943                        | (C/G)       |
| 12115       | CakSNP12115    | <i>Kabuli</i>    | <i>Ca_Kabuli_Chr07</i>       | 7663564                        | (A/G)       |
| 12116       | CakSNP12116    | <i>Kabuli</i>    | <i>Ca_Kabuli_Chr07</i>       | 7706816                        | (A/G)       |
| 12117       | CakSNP12117    | <i>Kabuli</i>    | <i>Ca_Kabuli_Chr07</i>       | 7756455                        | (C/T)       |
| 12118       | CakSNP12118    | <i>Kabuli</i>    | <i>Ca_Kabuli_Chr07</i>       | 7756482                        | (G/A)       |
| 12119       | CakSNP12119    | <i>Kabuli</i>    | <i>Ca_Kabuli_Chr07</i>       | 7756566                        | (G/A)       |
| 12120       | CakSNP12120    | <i>Kabuli</i>    | <i>Ca_Kabuli_Chr07</i>       | 7809179                        | (T/G)       |
| 12121       | CakSNP12121    | <i>Kabuli</i>    | <i>Ca_Kabuli_Chr07</i>       | 7809192                        | (A/C)       |
| 12122       | CakSNP12122    | <i>Kabuli</i>    | <i>Ca_Kabuli_Chr07</i>       | 7875189                        | (C/A)       |
| 12123       | CakSNP12123    | <i>Kabuli</i>    | <i>Ca_Kabuli_Chr07</i>       | 7876554                        | (G/A)       |
| 12124       | CakSNP12124    | <i>Kabuli</i>    | <i>Ca_Kabuli_Chr07</i>       | 7876561                        | (C/T)       |
| 12125       | CakSNP12125    | <i>Kabuli</i>    | <i>Ca_Kabuli_Chr07</i>       | 7876570                        | (C/A)       |
| 12126       | CakSNP12126    | <i>Kabuli</i>    | <i>Ca_Kabuli_Chr07</i>       | 7928398                        | (C/T)       |
| 12127       | CakSNP12127    | <i>Kabuli</i>    | <i>Ca_Kabuli_Chr07</i>       | 7982650                        | (G/T)       |



| <b>S.N.</b> | <b>SNP IDs</b> | <b>Cultivars</b> | <b>Chromosomes/scaffolds</b> | <b>Physical positions (bp)</b> | <b>SNPs</b> |
|-------------|----------------|------------------|------------------------------|--------------------------------|-------------|
| 12128       | CakSNP12128    | <i>Kabuli</i>    | <i>Ca_Kabuli_Chr07</i>       | 7982871                        | (T/C)       |
| 12129       | CakSNP12129    | <i>Kabuli</i>    | <i>Ca_Kabuli_Chr07</i>       | 7982890                        | (T/A)       |
| 12130       | CakSNP12130    | <i>Kabuli</i>    | <i>Ca_Kabuli_Chr07</i>       | 7983519                        | (C/T)       |
| 12131       | CakSNP12131    | <i>Kabuli</i>    | <i>Ca_Kabuli_Chr07</i>       | 8041465                        | (T/G)       |
| 12132       | CakSNP12132    | <i>Kabuli</i>    | <i>Ca_Kabuli_Chr07</i>       | 8054489                        | (G/A)       |
| 12133       | CakSNP12133    | <i>Kabuli</i>    | <i>Ca_Kabuli_Chr07</i>       | 8061808                        | (A/G)       |
| 12134       | CakSNP12134    | <i>Kabuli</i>    | <i>Ca_Kabuli_Chr07</i>       | 8111735                        | (T/C)       |
| 12135       | CakSNP12135    | <i>Kabuli</i>    | <i>Ca_Kabuli_Chr07</i>       | 8111754                        | (A/C)       |
| 12136       | CakSNP12136    | <i>Kabuli</i>    | <i>Ca_Kabuli_Chr07</i>       | 8111759                        | (G/T)       |
| 12137       | CakSNP12137    | <i>Kabuli</i>    | <i>Ca_Kabuli_Chr07</i>       | 8169857                        | (A/G)       |
| 12138       | CakSNP12138    | <i>Kabuli</i>    | <i>Ca_Kabuli_Chr07</i>       | 8169866                        | (A/G)       |
| 12139       | CakSNP12139    | <i>Kabuli</i>    | <i>Ca_Kabuli_Chr07</i>       | 8169960                        | (A/T)       |
| 12140       | CakSNP12140    | <i>Kabuli</i>    | <i>Ca_Kabuli_Chr07</i>       | 8169947                        | (T/C)       |
| 12141       | CakSNP12141    | <i>Kabuli</i>    | <i>Ca_Kabuli_Chr07</i>       | 8187181                        | (G/A)       |
| 12142       | CakSNP12142    | <i>Kabuli</i>    | <i>Ca_Kabuli_Chr07</i>       | 8188004                        | (C/G)       |
| 12143       | CakSNP12143    | <i>Kabuli</i>    | <i>Ca_Kabuli_Chr07</i>       | 8210963                        | (G/A)       |
| 12144       | CakSNP12144    | <i>Kabuli</i>    | <i>Ca_Kabuli_Chr07</i>       | 8261062                        | (C/A)       |
| 12145       | CakSNP12145    | <i>Kabuli</i>    | <i>Ca_Kabuli_Chr07</i>       | 8286115                        | (A/T)       |
| 12146       | CakSNP12146    | <i>Kabuli</i>    | <i>Ca_Kabuli_Chr07</i>       | 8515092                        | (C/T)       |
| 12147       | CakSNP12147    | <i>Kabuli</i>    | <i>Ca_Kabuli_Chr07</i>       | 8535189                        | (C/T)       |
| 12148       | CakSNP12148    | <i>Kabuli</i>    | <i>Ca_Kabuli_Chr07</i>       | 8553114                        | (C/T)       |
| 12149       | CakSNP12149    | <i>Kabuli</i>    | <i>Ca_Kabuli_Chr07</i>       | 8569632                        | (A/G)       |
| 12150       | CakSNP12150    | <i>Kabuli</i>    | <i>Ca_Kabuli_Chr07</i>       | 8583890                        | (T/C)       |
| 12151       | CakSNP12151    | <i>Kabuli</i>    | <i>Ca_Kabuli_Chr07</i>       | 8609831                        | (A/T)       |
| 12152       | CakSNP12152    | <i>Kabuli</i>    | <i>Ca_Kabuli_Chr07</i>       | 8626840                        | (A/C)       |
| 12153       | CakSNP12153    | <i>Kabuli</i>    | <i>Ca_Kabuli_Chr07</i>       | 8626875                        | (A/T)       |
| 12154       | CakSNP12154    | <i>Kabuli</i>    | <i>Ca_Kabuli_Chr07</i>       | 8626916                        | (T/C)       |
| 12155       | CakSNP12155    | <i>Kabuli</i>    | <i>Ca_Kabuli_Chr07</i>       | 8741098                        | (T/C)       |
| 12156       | CakSNP12156    | <i>Kabuli</i>    | <i>Ca_Kabuli_Chr07</i>       | 8777670                        | (A/G)       |
| 12157       | CakSNP12157    | <i>Kabuli</i>    | <i>Ca_Kabuli_Chr07</i>       | 8777673                        | (A/G)       |
| 12158       | CakSNP12158    | <i>Kabuli</i>    | <i>Ca_Kabuli_Chr07</i>       | 8777690                        | (G/A)       |
| 12159       | CakSNP12159    | <i>Kabuli</i>    | <i>Ca_Kabuli_Chr07</i>       | 8824586                        | (A/G)       |
| 12160       | CakSNP12160    | <i>Kabuli</i>    | <i>Ca_Kabuli_Chr07</i>       | 8824591                        | (C/T)       |
| 12161       | CakSNP12161    | <i>Kabuli</i>    | <i>Ca_Kabuli_Chr07</i>       | 8830772                        | (A/C)       |
| 12162       | CakSNP12162    | <i>Kabuli</i>    | <i>Ca_Kabuli_Chr07</i>       | 8830985                        | (A/G)       |
| 12163       | CakSNP12163    | <i>Kabuli</i>    | <i>Ca_Kabuli_Chr07</i>       | 8831024                        | (C/T)       |
| 12164       | CakSNP12164    | <i>Kabuli</i>    | <i>Ca_Kabuli_Chr07</i>       | 8831096                        | (G/A)       |
| 12165       | CakSNP12165    | <i>Kabuli</i>    | <i>Ca_Kabuli_Chr07</i>       | 8835601                        | (G/A)       |
| 12166       | CakSNP12166    | <i>Kabuli</i>    | <i>Ca_Kabuli_Chr07</i>       | 8835602                        | (A/G)       |

| <b>S.N.</b> | <b>SNP IDs</b> | <b>Cultivars</b> | <b>Chromosomes/scaffolds</b> | <b>Physical positions (bp)</b> | <b>SNPs</b> |
|-------------|----------------|------------------|------------------------------|--------------------------------|-------------|
| 12167       | CakSNP12167    | <i>Kabuli</i>    | <i>Ca_Kabuli_Chr07</i>       | 8835610                        | (G/A)       |
| 12168       | CakSNP12168    | <i>Kabuli</i>    | <i>Ca_Kabuli_Chr07</i>       | 8835659                        | (G/T)       |
| 12169       | CakSNP12169    | <i>Kabuli</i>    | <i>Ca_Kabuli_Chr07</i>       | 8835757                        | (T/C)       |
| 12170       | CakSNP12170    | <i>Kabuli</i>    | <i>Ca_Kabuli_Chr07</i>       | 8835718                        | (T/G)       |
| 12171       | CakSNP12171    | <i>Kabuli</i>    | <i>Ca_Kabuli_Chr07</i>       | 8835705                        | (T/A)       |
| 12172       | CakSNP12172    | <i>Kabuli</i>    | <i>Ca_Kabuli_Chr07</i>       | 8844902                        | (C/T)       |
| 12173       | CakSNP12173    | <i>Kabuli</i>    | <i>Ca_Kabuli_Chr07</i>       | 8894362                        | (A/T)       |
| 12174       | CakSNP12174    | <i>Kabuli</i>    | <i>Ca_Kabuli_Chr07</i>       | 8895087                        | (T/C)       |
| 12175       | CakSNP12175    | <i>Kabuli</i>    | <i>Ca_Kabuli_Chr07</i>       | 8913092                        | (C/G)       |
| 12176       | CakSNP12176    | <i>Kabuli</i>    | <i>Ca_Kabuli_Chr07</i>       | 8937391                        | (A/G)       |
| 12177       | CakSNP12177    | <i>Kabuli</i>    | <i>Ca_Kabuli_Chr07</i>       | 8970387                        | (A/G)       |
| 12178       | CakSNP12178    | <i>Kabuli</i>    | <i>Ca_Kabuli_Chr07</i>       | 9128044                        | (A/G)       |
| 12179       | CakSNP12179    | <i>Kabuli</i>    | <i>Ca_Kabuli_Chr07</i>       | 9128050                        | (C/A)       |
| 12180       | CakSNP12180    | <i>Kabuli</i>    | <i>Ca_Kabuli_Chr07</i>       | 9147367                        | (A/T)       |
| 12181       | CakSNP12181    | <i>Kabuli</i>    | <i>Ca_Kabuli_Chr07</i>       | 9147366                        | (T/G)       |
| 12182       | CakSNP12182    | <i>Kabuli</i>    | <i>Ca_Kabuli_Chr07</i>       | 9147502                        | (C/T)       |
| 12183       | CakSNP12183    | <i>Kabuli</i>    | <i>Ca_Kabuli_Chr07</i>       | 9151709                        | (T/G)       |
| 12184       | CakSNP12184    | <i>Kabuli</i>    | <i>Ca_Kabuli_Chr07</i>       | 9151755                        | (C/T)       |
| 12185       | CakSNP12185    | <i>Kabuli</i>    | <i>Ca_Kabuli_Chr07</i>       | 9153104                        | (C/A)       |
| 12186       | CakSNP12186    | <i>Kabuli</i>    | <i>Ca_Kabuli_Chr07</i>       | 9153062                        | (G/A)       |
| 12187       | CakSNP12187    | <i>Kabuli</i>    | <i>Ca_Kabuli_Chr07</i>       | 9214457                        | (T/A)       |
| 12188       | CakSNP12188    | <i>Kabuli</i>    | <i>Ca_Kabuli_Chr07</i>       | 9214422                        | (C/T)       |
| 12189       | CakSNP12189    | <i>Kabuli</i>    | <i>Ca_Kabuli_Chr07</i>       | 9301825                        | (G/C)       |
| 12190       | CakSNP12190    | <i>Kabuli</i>    | <i>Ca_Kabuli_Chr07</i>       | 9301881                        | (C/T)       |
| 12191       | CakSNP12191    | <i>Kabuli</i>    | <i>Ca_Kabuli_Chr07</i>       | 9327709                        | (C/T)       |
| 12192       | CakSNP12192    | <i>Kabuli</i>    | <i>Ca_Kabuli_Chr07</i>       | 9327687                        | (G/A)       |
| 12193       | CakSNP12193    | <i>Kabuli</i>    | <i>Ca_Kabuli_Chr07</i>       | 9348281                        | (T/C)       |
| 12194       | CakSNP12194    | <i>Kabuli</i>    | <i>Ca_Kabuli_Chr07</i>       | 9350506                        | (T/G)       |
| 12195       | CakSNP12195    | <i>Kabuli</i>    | <i>Ca_Kabuli_Chr07</i>       | 9350535                        | (A/C)       |
| 12196       | CakSNP12196    | <i>Kabuli</i>    | <i>Ca_Kabuli_Chr07</i>       | 9351783                        | (C/G)       |
| 12197       | CakSNP12197    | <i>Kabuli</i>    | <i>Ca_Kabuli_Chr07</i>       | 9351863                        | (G/A)       |
| 12198       | CakSNP12198    | <i>Kabuli</i>    | <i>Ca_Kabuli_Chr07</i>       | 9422842                        | (T/C)       |
| 12199       | CakSNP12199    | <i>Kabuli</i>    | <i>Ca_Kabuli_Chr07</i>       | 9422859                        | (T/C)       |
| 12200       | CakSNP12200    | <i>Kabuli</i>    | <i>Ca_Kabuli_Chr07</i>       | 9422876                        | (T/C)       |
| 12201       | CakSNP12201    | <i>Kabuli</i>    | <i>Ca_Kabuli_Chr07</i>       | 9422946                        | (G/C)       |
| 12202       | CakSNP12202    | <i>Kabuli</i>    | <i>Ca_Kabuli_Chr07</i>       | 9442836                        | (A/C)       |
| 12203       | CakSNP12203    | <i>Kabuli</i>    | <i>Ca_Kabuli_Chr07</i>       | 9475275                        | (T/G)       |
| 12204       | CakSNP12204    | <i>Kabuli</i>    | <i>Ca_Kabuli_Chr07</i>       | 9475817                        | (C/A)       |
| 12205       | CakSNP12205    | <i>Kabuli</i>    | <i>Ca_Kabuli_Chr07</i>       | 9475922                        | (A/G)       |

| <b>S.N.</b> | <b>SNP IDs</b> | <b>Cultivars</b> | <b>Chromosomes/scaffolds</b> | <b>Physical positions (bp)</b> | <b>SNPs</b> |
|-------------|----------------|------------------|------------------------------|--------------------------------|-------------|
| 12206       | CakSNP12206    | <i>Kabuli</i>    | <i>Ca_Kabuli_Chr07</i>       | 9475874                        | (C/T)       |
| 12207       | CakSNP12207    | <i>Kabuli</i>    | <i>Ca_Kabuli_Chr07</i>       | 9523902                        | (C/T)       |
| 12208       | CakSNP12208    | <i>Kabuli</i>    | <i>Ca_Kabuli_Chr07</i>       | 9528324                        | (A/G)       |
| 12209       | CakSNP12209    | <i>Kabuli</i>    | <i>Ca_Kabuli_Chr07</i>       | 9536012                        | (C/T)       |
| 12210       | CakSNP12210    | <i>Kabuli</i>    | <i>Ca_Kabuli_Chr07</i>       | 9550284                        | (G/C)       |
| 12211       | CakSNP12211    | <i>Kabuli</i>    | <i>Ca_Kabuli_Chr07</i>       | 9550230                        | (C/T)       |
| 12212       | CakSNP12212    | <i>Kabuli</i>    | <i>Ca_Kabuli_Chr07</i>       | 9555319                        | (C/G)       |
| 12213       | CakSNP12213    | <i>Kabuli</i>    | <i>Ca_Kabuli_Chr07</i>       | 9577441                        | (G/A)       |
| 12214       | CakSNP12214    | <i>Kabuli</i>    | <i>Ca_Kabuli_Chr07</i>       | 9577424                        | (G/C)       |
| 12215       | CakSNP12215    | <i>Kabuli</i>    | <i>Ca_Kabuli_Chr07</i>       | 9593677                        | (C/T)       |
| 12216       | CakSNP12216    | <i>Kabuli</i>    | <i>Ca_Kabuli_Chr07</i>       | 9612558                        | (A/C)       |
| 12217       | CakSNP12217    | <i>Kabuli</i>    | <i>Ca_Kabuli_Chr07</i>       | 9616335                        | (G/A)       |
| 12218       | CakSNP12218    | <i>Kabuli</i>    | <i>Ca_Kabuli_Chr07</i>       | 9616347                        | (C/G)       |
| 12219       | CakSNP12219    | <i>Kabuli</i>    | <i>Ca_Kabuli_Chr07</i>       | 9616357                        | (C/T)       |
| 12220       | CakSNP12220    | <i>Kabuli</i>    | <i>Ca_Kabuli_Chr07</i>       | 9616363                        | (A/C)       |
| 12221       | CakSNP12221    | <i>Kabuli</i>    | <i>Ca_Kabuli_Chr07</i>       | 9616367                        | (C/G)       |
| 12222       | CakSNP12222    | <i>Kabuli</i>    | <i>Ca_Kabuli_Chr07</i>       | 9616378                        | (G/A)       |
| 12223       | CakSNP12223    | <i>Kabuli</i>    | <i>Ca_Kabuli_Chr07</i>       | 9637456                        | (C/T)       |
| 12224       | CakSNP12224    | <i>Kabuli</i>    | <i>Ca_Kabuli_Chr07</i>       | 9639993                        | (C/A)       |
| 12225       | CakSNP12225    | <i>Kabuli</i>    | <i>Ca_Kabuli_Chr07</i>       | 9661050                        | (A/C)       |
| 12226       | CakSNP12226    | <i>Kabuli</i>    | <i>Ca_Kabuli_Chr07</i>       | 9671210                        | (T/C)       |
| 12227       | CakSNP12227    | <i>Kabuli</i>    | <i>Ca_Kabuli_Chr07</i>       | 9696620                        | (A/G)       |
| 12228       | CakSNP12228    | <i>Kabuli</i>    | <i>Ca_Kabuli_Chr07</i>       | 9738801                        | (T/C)       |
| 12229       | CakSNP12229    | <i>Kabuli</i>    | <i>Ca_Kabuli_Chr07</i>       | 9744436                        | (G/T)       |
| 12230       | CakSNP12230    | <i>Kabuli</i>    | <i>Ca_Kabuli_Chr07</i>       | 9890779                        | (A/C)       |
| 12231       | CakSNP12231    | <i>Kabuli</i>    | <i>Ca_Kabuli_Chr07</i>       | 9890777                        | (A/G)       |
| 12232       | CakSNP12232    | <i>Kabuli</i>    | <i>Ca_Kabuli_Chr07</i>       | 9893688                        | (A/G)       |
| 12233       | CakSNP12233    | <i>Kabuli</i>    | <i>Ca_Kabuli_Chr07</i>       | 9897698                        | (T/G)       |
| 12234       | CakSNP12234    | <i>Kabuli</i>    | <i>Ca_Kabuli_Chr07</i>       | 9898718                        | (A/T)       |
| 12235       | CakSNP12235    | <i>Kabuli</i>    | <i>Ca_Kabuli_Chr07</i>       | 9899348                        | (C/T)       |
| 12236       | CakSNP12236    | <i>Kabuli</i>    | <i>Ca_Kabuli_Chr07</i>       | 9914751                        | (G/A)       |
| 12237       | CakSNP12237    | <i>Kabuli</i>    | <i>Ca_Kabuli_Chr07</i>       | 9914764                        | (G/A)       |
| 12238       | CakSNP12238    | <i>Kabuli</i>    | <i>Ca_Kabuli_Chr07</i>       | 9914770                        | (T/C)       |
| 12239       | CakSNP12239    | <i>Kabuli</i>    | <i>Ca_Kabuli_Chr07</i>       | 9914785                        | (T/C)       |
| 12240       | CakSNP12240    | <i>Kabuli</i>    | <i>Ca_Kabuli_Chr07</i>       | 9914794                        | (G/A)       |
| 12241       | CakSNP12241    | <i>Kabuli</i>    | <i>Ca_Kabuli_Chr07</i>       | 9914737                        | (C/G)       |
| 12242       | CakSNP12242    | <i>Kabuli</i>    | <i>Ca_Kabuli_Chr07</i>       | 9914745                        | (T/C)       |
| 12243       | CakSNP12243    | <i>Kabuli</i>    | <i>Ca_Kabuli_Chr07</i>       | 9914856                        | (G/A)       |
| 12244       | CakSNP12244    | <i>Kabuli</i>    | <i>Ca_Kabuli_Chr07</i>       | 9914845                        | (A/C)       |

| <b>S.N.</b> | <b>SNP IDs</b> | <b>Cultivars</b> | <b>Chromosomes/scaffolds</b> | <b>Physical positions (bp)</b> | <b>SNPs</b> |
|-------------|----------------|------------------|------------------------------|--------------------------------|-------------|
| 12245       | CakSNP12245    | <i>Kabuli</i>    | <i>Ca_Kabuli_Chr07</i>       | 9914832                        | (C/T)       |
| 12246       | CakSNP12246    | <i>Kabuli</i>    | <i>Ca_Kabuli_Chr07</i>       | 9914802                        | (T/G)       |
| 12247       | CakSNP12247    | <i>Kabuli</i>    | <i>Ca_Kabuli_Chr07</i>       | 9932369                        | (A/G)       |
| 12248       | CakSNP12248    | <i>Kabuli</i>    | <i>Ca_Kabuli_Chr07</i>       | 9936661                        | (C/T)       |
| 12249       | CakSNP12249    | <i>Kabuli</i>    | <i>Ca_Kabuli_Chr07</i>       | 9936854                        | (A/G)       |
| 12250       | CakSNP12250    | <i>Kabuli</i>    | <i>Ca_Kabuli_Chr07</i>       | 9938937                        | (T/C)       |
| 12251       | CakSNP12251    | <i>Kabuli</i>    | <i>Ca_Kabuli_Chr07</i>       | 10050020                       | (A/C)       |
| 12252       | CakSNP12252    | <i>Kabuli</i>    | <i>Ca_Kabuli_Chr07</i>       | 10049998                       | (T/A)       |
| 12253       | CakSNP12253    | <i>Kabuli</i>    | <i>Ca_Kabuli_Chr07</i>       | 10049996                       | (A/G)       |
| 12254       | CakSNP12254    | <i>Kabuli</i>    | <i>Ca_Kabuli_Chr07</i>       | 10089428                       | (T/C)       |
| 12255       | CakSNP12255    | <i>Kabuli</i>    | <i>Ca_Kabuli_Chr07</i>       | 10089539                       | (T/A)       |
| 12256       | CakSNP12256    | <i>Kabuli</i>    | <i>Ca_Kabuli_Chr07</i>       | 10106084                       | (C/G)       |
| 12257       | CakSNP12257    | <i>Kabuli</i>    | <i>Ca_Kabuli_Chr07</i>       | 10106065                       | (A/G)       |
| 12258       | CakSNP12258    | <i>Kabuli</i>    | <i>Ca_Kabuli_Chr07</i>       | 10106054                       | (G/C)       |
| 12259       | CakSNP12259    | <i>Kabuli</i>    | <i>Ca_Kabuli_Chr07</i>       | 10137842                       | (A/G)       |
| 12260       | CakSNP12260    | <i>Kabuli</i>    | <i>Ca_Kabuli_Chr07</i>       | 10137890                       | (A/G)       |
| 12261       | CakSNP12261    | <i>Kabuli</i>    | <i>Ca_Kabuli_Chr07</i>       | 10181630                       | (G/T)       |
| 12262       | CakSNP12262    | <i>Kabuli</i>    | <i>Ca_Kabuli_Chr07</i>       | 10208029                       | (T/C)       |
| 12263       | CakSNP12263    | <i>Kabuli</i>    | <i>Ca_Kabuli_Chr07</i>       | 10216813                       | (G/A)       |
| 12264       | CakSNP12264    | <i>Kabuli</i>    | <i>Ca_Kabuli_Chr07</i>       | 10223046                       | (C/T)       |
| 12265       | CakSNP12265    | <i>Kabuli</i>    | <i>Ca_Kabuli_Chr07</i>       | 10223068                       | (G/T)       |
| 12266       | CakSNP12266    | <i>Kabuli</i>    | <i>Ca_Kabuli_Chr07</i>       | 10223069                       | (G/T)       |
| 12267       | CakSNP12267    | <i>Kabuli</i>    | <i>Ca_Kabuli_Chr07</i>       | 10223071                       | (T/A)       |
| 12268       | CakSNP12268    | <i>Kabuli</i>    | <i>Ca_Kabuli_Chr07</i>       | 10223074                       | (G/T)       |
| 12269       | CakSNP12269    | <i>Kabuli</i>    | <i>Ca_Kabuli_Chr07</i>       | 10223075                       | (C/T)       |
| 12270       | CakSNP12270    | <i>Kabuli</i>    | <i>Ca_Kabuli_Chr07</i>       | 10322726                       | (T/C)       |
| 12271       | CakSNP12271    | <i>Kabuli</i>    | <i>Ca_Kabuli_Chr07</i>       | 10340199                       | (T/C)       |
| 12272       | CakSNP12272    | <i>Kabuli</i>    | <i>Ca_Kabuli_Chr07</i>       | 10435983                       | (C/A)       |
| 12273       | CakSNP12273    | <i>Kabuli</i>    | <i>Ca_Kabuli_Chr07</i>       | 10465140                       | (G/A)       |
| 12274       | CakSNP12274    | <i>Kabuli</i>    | <i>Ca_Kabuli_Chr07</i>       | 10480401                       | (A/C)       |
| 12275       | CakSNP12275    | <i>Kabuli</i>    | <i>Ca_Kabuli_Chr07</i>       | 10480462                       | (A/G)       |
| 12276       | CakSNP12276    | <i>Kabuli</i>    | <i>Ca_Kabuli_Chr07</i>       | 10484200                       | (G/A)       |
| 12277       | CakSNP12277    | <i>Kabuli</i>    | <i>Ca_Kabuli_Chr07</i>       | 10484225                       | (C/A)       |
| 12278       | CakSNP12278    | <i>Kabuli</i>    | <i>Ca_Kabuli_Chr07</i>       | 10484196                       | (C/T)       |
| 12279       | CakSNP12279    | <i>Kabuli</i>    | <i>Ca_Kabuli_Chr07</i>       | 10485414                       | (C/T)       |
| 12280       | CakSNP12280    | <i>Kabuli</i>    | <i>Ca_Kabuli_Chr07</i>       | 10521423                       | (G/T)       |
| 12281       | CakSNP12281    | <i>Kabuli</i>    | <i>Ca_Kabuli_Chr07</i>       | 10521449                       | (C/A)       |
| 12282       | CakSNP12282    | <i>Kabuli</i>    | <i>Ca_Kabuli_Chr07</i>       | 10614159                       | (G/A)       |
| 12283       | CakSNP12283    | <i>Kabuli</i>    | <i>Ca_Kabuli_Chr07</i>       | 10658367                       | (A/T)       |

| <b>S.N.</b> | <b>SNP IDs</b> | <b>Cultivars</b> | <b>Chromosomes/scaffolds</b> | <b>Physical positions (bp)</b> | <b>SNPs</b> |
|-------------|----------------|------------------|------------------------------|--------------------------------|-------------|
| 12284       | CakSNP12284    | <i>Kabuli</i>    | <i>Ca_Kabuli_Chr07</i>       | 10658446                       | (G/T)       |
| 12285       | CakSNP12285    | <i>Kabuli</i>    | <i>Ca_Kabuli_Chr07</i>       | 10688189                       | (T/G)       |
| 12286       | CakSNP12286    | <i>Kabuli</i>    | <i>Ca_Kabuli_Chr07</i>       | 10688401                       | (A/G)       |
| 12287       | CakSNP12287    | <i>Kabuli</i>    | <i>Ca_Kabuli_Chr07</i>       | 10688464                       | (G/A)       |
| 12288       | CakSNP12288    | <i>Kabuli</i>    | <i>Ca_Kabuli_Chr07</i>       | 10688434                       | (T/C)       |
| 12289       | CakSNP12289    | <i>Kabuli</i>    | <i>Ca_Kabuli_Chr07</i>       | 10688499                       | (T/C)       |
| 12290       | CakSNP12290    | <i>Kabuli</i>    | <i>Ca_Kabuli_Chr07</i>       | 10703569                       | (A/T)       |
| 12291       | CakSNP12291    | <i>Kabuli</i>    | <i>Ca_Kabuli_Chr07</i>       | 10703612                       | (A/C)       |
| 12292       | CakSNP12292    | <i>Kabuli</i>    | <i>Ca_Kabuli_Chr07</i>       | 10703704                       | (G/A)       |
| 12293       | CakSNP12293    | <i>Kabuli</i>    | <i>Ca_Kabuli_Chr07</i>       | 10703679                       | (T/C)       |
| 12294       | CakSNP12294    | <i>Kabuli</i>    | <i>Ca_Kabuli_Chr07</i>       | 10712202                       | (T/C)       |
| 12295       | CakSNP12295    | <i>Kabuli</i>    | <i>Ca_Kabuli_Chr07</i>       | 10712231                       | (G/A)       |
| 12296       | CakSNP12296    | <i>Kabuli</i>    | <i>Ca_Kabuli_Chr07</i>       | 10758973                       | (A/T)       |
| 12297       | CakSNP12297    | <i>Kabuli</i>    | <i>Ca_Kabuli_Chr07</i>       | 10759142                       | (T/G)       |
| 12298       | CakSNP12298    | <i>Kabuli</i>    | <i>Ca_Kabuli_Chr07</i>       | 10775881                       | (C/T)       |
| 12299       | CakSNP12299    | <i>Kabuli</i>    | <i>Ca_Kabuli_Chr07</i>       | 10775875                       | (A/G)       |
| 12300       | CakSNP12300    | <i>Kabuli</i>    | <i>Ca_Kabuli_Chr07</i>       | 10775851                       | (C/T)       |
| 12301       | CakSNP12301    | <i>Kabuli</i>    | <i>Ca_Kabuli_Chr07</i>       | 10775860                       | (A/G)       |
| 12302       | CakSNP12302    | <i>Kabuli</i>    | <i>Ca_Kabuli_Chr07</i>       | 10780680                       | (C/G)       |
| 12303       | CakSNP12303    | <i>Kabuli</i>    | <i>Ca_Kabuli_Chr07</i>       | 10780682                       | (G/A)       |
| 12304       | CakSNP12304    | <i>Kabuli</i>    | <i>Ca_Kabuli_Chr07</i>       | 10780686                       | (T/C)       |
| 12305       | CakSNP12305    | <i>Kabuli</i>    | <i>Ca_Kabuli_Chr07</i>       | 10797204                       | (T/C)       |
| 12306       | CakSNP12306    | <i>Kabuli</i>    | <i>Ca_Kabuli_Chr07</i>       | 10812617                       | (G/T)       |
| 12307       | CakSNP12307    | <i>Kabuli</i>    | <i>Ca_Kabuli_Chr07</i>       | 10816523                       | (T/G)       |
| 12308       | CakSNP12308    | <i>Kabuli</i>    | <i>Ca_Kabuli_Chr07</i>       | 10816674                       | (C/T)       |
| 12309       | CakSNP12309    | <i>Kabuli</i>    | <i>Ca_Kabuli_Chr07</i>       | 10816662                       | (T/A)       |
| 12310       | CakSNP12310    | <i>Kabuli</i>    | <i>Ca_Kabuli_Chr07</i>       | 10859907                       | (G/A)       |
| 12311       | CakSNP12311    | <i>Kabuli</i>    | <i>Ca_Kabuli_Chr07</i>       | 10859842                       | (G/T)       |
| 12312       | CakSNP12312    | <i>Kabuli</i>    | <i>Ca_Kabuli_Chr07</i>       | 10900910                       | (T/C)       |
| 12313       | CakSNP12313    | <i>Kabuli</i>    | <i>Ca_Kabuli_Chr07</i>       | 11086047                       | (G/A)       |
| 12314       | CakSNP12314    | <i>Kabuli</i>    | <i>Ca_Kabuli_Chr07</i>       | 11086071                       | (A/T)       |
| 12315       | CakSNP12315    | <i>Kabuli</i>    | <i>Ca_Kabuli_Chr07</i>       | 11105847                       | (C/G)       |
| 12316       | CakSNP12316    | <i>Kabuli</i>    | <i>Ca_Kabuli_Chr07</i>       | 11105961                       | (A/C)       |
| 12317       | CakSNP12317    | <i>Kabuli</i>    | <i>Ca_Kabuli_Chr07</i>       | 11192667                       | (G/A)       |
| 12318       | CakSNP12318    | <i>Kabuli</i>    | <i>Ca_Kabuli_Chr07</i>       | 11192712                       | (C/T)       |
| 12319       | CakSNP12319    | <i>Kabuli</i>    | <i>Ca_Kabuli_Chr07</i>       | 11192703                       | (A/C)       |
| 12320       | CakSNP12320    | <i>Kabuli</i>    | <i>Ca_Kabuli_Chr07</i>       | 11261924                       | (G/A)       |
| 12321       | CakSNP12321    | <i>Kabuli</i>    | <i>Ca_Kabuli_Chr07</i>       | 11339511                       | (C/T)       |
| 12322       | CakSNP12322    | <i>Kabuli</i>    | <i>Ca_Kabuli_Chr07</i>       | 11393795                       | (A/G)       |

| <b>S.N.</b> | <b>SNP IDs</b> | <b>Cultivars</b> | <b>Chromosomes/scaffolds</b> | <b>Physical positions (bp)</b> | <b>SNPs</b> |
|-------------|----------------|------------------|------------------------------|--------------------------------|-------------|
| 12323       | CakSNP12323    | <i>Kabuli</i>    | <i>Ca_Kabuli_Chr07</i>       | 11393986                       | (A/G)       |
| 12324       | CakSNP12324    | <i>Kabuli</i>    | <i>Ca_Kabuli_Chr07</i>       | 11473766                       | (A/G)       |
| 12325       | CakSNP12325    | <i>Kabuli</i>    | <i>Ca_Kabuli_Chr07</i>       | 11521694                       | (G/A)       |
| 12326       | CakSNP12326    | <i>Kabuli</i>    | <i>Ca_Kabuli_Chr07</i>       | 11527428                       | (G/A)       |
| 12327       | CakSNP12327    | <i>Kabuli</i>    | <i>Ca_Kabuli_Chr07</i>       | 11545846                       | (A/G)       |
| 12328       | CakSNP12328    | <i>Kabuli</i>    | <i>Ca_Kabuli_Chr07</i>       | 11568963                       | (T/A)       |
| 12329       | CakSNP12329    | <i>Kabuli</i>    | <i>Ca_Kabuli_Chr07</i>       | 11568945                       | (G/T)       |
| 12330       | CakSNP12330    | <i>Kabuli</i>    | <i>Ca_Kabuli_Chr07</i>       | 11590987                       | (A/C)       |
| 12331       | CakSNP12331    | <i>Kabuli</i>    | <i>Ca_Kabuli_Chr07</i>       | 11630509                       | (A/G)       |
| 12332       | CakSNP12332    | <i>Kabuli</i>    | <i>Ca_Kabuli_Chr07</i>       | 11630511                       | (C/T)       |
| 12333       | CakSNP12333    | <i>Kabuli</i>    | <i>Ca_Kabuli_Chr07</i>       | 11638885                       | (C/A)       |
| 12334       | CakSNP12334    | <i>Kabuli</i>    | <i>Ca_Kabuli_Chr07</i>       | 11639117                       | (C/G)       |
| 12335       | CakSNP12335    | <i>Kabuli</i>    | <i>Ca_Kabuli_Chr07</i>       | 11685818                       | (G/T)       |
| 12336       | CakSNP12336    | <i>Kabuli</i>    | <i>Ca_Kabuli_Chr07</i>       | 11685899                       | (A/G)       |
| 12337       | CakSNP12337    | <i>Kabuli</i>    | <i>Ca_Kabuli_Chr07</i>       | 11686238                       | (C/T)       |
| 12338       | CakSNP12338    | <i>Kabuli</i>    | <i>Ca_Kabuli_Chr07</i>       | 11725655                       | (G/A)       |
| 12339       | CakSNP12339    | <i>Kabuli</i>    | <i>Ca_Kabuli_Chr07</i>       | 11730926                       | (T/C)       |
| 12340       | CakSNP12340    | <i>Kabuli</i>    | <i>Ca_Kabuli_Chr07</i>       | 11730946                       | (A/C)       |
| 12341       | CakSNP12341    | <i>Kabuli</i>    | <i>Ca_Kabuli_Chr07</i>       | 11735177                       | (T/C)       |
| 12342       | CakSNP12342    | <i>Kabuli</i>    | <i>Ca_Kabuli_Chr07</i>       | 11735381                       | (T/C)       |
| 12343       | CakSNP12343    | <i>Kabuli</i>    | <i>Ca_Kabuli_Chr07</i>       | 11735368                       | (G/C)       |
| 12344       | CakSNP12344    | <i>Kabuli</i>    | <i>Ca_Kabuli_Chr07</i>       | 11736006                       | (C/A)       |
| 12345       | CakSNP12345    | <i>Kabuli</i>    | <i>Ca_Kabuli_Chr07</i>       | 11792042                       | (G/A)       |
| 12346       | CakSNP12346    | <i>Kabuli</i>    | <i>Ca_Kabuli_Chr07</i>       | 11792126                       | (T/A)       |
| 12347       | CakSNP12347    | <i>Kabuli</i>    | <i>Ca_Kabuli_Chr07</i>       | 11792136                       | (G/A)       |
| 12348       | CakSNP12348    | <i>Kabuli</i>    | <i>Ca_Kabuli_Chr07</i>       | 11803091                       | (T/G)       |
| 12349       | CakSNP12349    | <i>Kabuli</i>    | <i>Ca_Kabuli_Chr07</i>       | 11812410                       | (G/A)       |
| 12350       | CakSNP12350    | <i>Kabuli</i>    | <i>Ca_Kabuli_Chr07</i>       | 11812441                       | (A/C)       |
| 12351       | CakSNP12351    | <i>Kabuli</i>    | <i>Ca_Kabuli_Chr07</i>       | 11858425                       | (C/T)       |
| 12352       | CakSNP12352    | <i>Kabuli</i>    | <i>Ca_Kabuli_Chr07</i>       | 11886954                       | (A/G)       |
| 12353       | CakSNP12353    | <i>Kabuli</i>    | <i>Ca_Kabuli_Chr07</i>       | 11902897                       | (A/G)       |
| 12354       | CakSNP12354    | <i>Kabuli</i>    | <i>Ca_Kabuli_Chr07</i>       | 11902985                       | (G/T)       |
| 12355       | CakSNP12355    | <i>Kabuli</i>    | <i>Ca_Kabuli_Chr07</i>       | 12010432                       | (G/A)       |
| 12356       | CakSNP12356    | <i>Kabuli</i>    | <i>Ca_Kabuli_Chr07</i>       | 12010471                       | (C/T)       |
| 12357       | CakSNP12357    | <i>Kabuli</i>    | <i>Ca_Kabuli_Chr07</i>       | 12010504                       | (G/A)       |
| 12358       | CakSNP12358    | <i>Kabuli</i>    | <i>Ca_Kabuli_Chr07</i>       | 12010499                       | (C/T)       |
| 12359       | CakSNP12359    | <i>Kabuli</i>    | <i>Ca_Kabuli_Chr07</i>       | 12010496                       | (G/A)       |
| 12360       | CakSNP12360    | <i>Kabuli</i>    | <i>Ca_Kabuli_Chr07</i>       | 12010494                       | (G/A)       |
| 12361       | CakSNP12361    | <i>Kabuli</i>    | <i>Ca_Kabuli_Chr07</i>       | 12010491                       | (G/T)       |

| <b>S.N.</b> | <b>SNP IDs</b> | <b>Cultivars</b> | <b>Chromosomes/scaffolds</b> | <b>Physical positions (bp)</b> | <b>SNPs</b> |
|-------------|----------------|------------------|------------------------------|--------------------------------|-------------|
| 12362       | CakSNP12362    | <i>Kabuli</i>    | <i>Ca_Kabuli_Chr07</i>       | 12010483                       | (C/T)       |
| 12363       | CakSNP12363    | <i>Kabuli</i>    | <i>Ca_Kabuli_Chr07</i>       | 12010457                       | (C/T)       |
| 12364       | CakSNP12364    | <i>Kabuli</i>    | <i>Ca_Kabuli_Chr07</i>       | 12010544                       | (G/A)       |
| 12365       | CakSNP12365    | <i>Kabuli</i>    | <i>Ca_Kabuli_Chr07</i>       | 12010489                       | (C/T)       |
| 12366       | CakSNP12366    | <i>Kabuli</i>    | <i>Ca_Kabuli_Chr07</i>       | 12030080                       | (A/C)       |
| 12367       | CakSNP12367    | <i>Kabuli</i>    | <i>Ca_Kabuli_Chr07</i>       | 12071764                       | (T/C)       |
| 12368       | CakSNP12368    | <i>Kabuli</i>    | <i>Ca_Kabuli_Chr07</i>       | 12071773                       | (A/T)       |
| 12369       | CakSNP12369    | <i>Kabuli</i>    | <i>Ca_Kabuli_Chr07</i>       | 12203726                       | (T/G)       |
| 12370       | CakSNP12370    | <i>Kabuli</i>    | <i>Ca_Kabuli_Chr07</i>       | 12203722                       | (T/C)       |
| 12371       | CakSNP12371    | <i>Kabuli</i>    | <i>Ca_Kabuli_Chr07</i>       | 12203706                       | (T/C)       |
| 12372       | CakSNP12372    | <i>Kabuli</i>    | <i>Ca_Kabuli_Chr07</i>       | 12203690                       | (C/T)       |
| 12373       | CakSNP12373    | <i>Kabuli</i>    | <i>Ca_Kabuli_Chr07</i>       | 12244234                       | (C/T)       |
| 12374       | CakSNP12374    | <i>Kabuli</i>    | <i>Ca_Kabuli_Chr07</i>       | 12244259                       | (G/A)       |
| 12375       | CakSNP12375    | <i>Kabuli</i>    | <i>Ca_Kabuli_Chr07</i>       | 12284289                       | (T/A)       |
| 12376       | CakSNP12376    | <i>Kabuli</i>    | <i>Ca_Kabuli_Chr07</i>       | 12284304                       | (A/G)       |
| 12377       | CakSNP12377    | <i>Kabuli</i>    | <i>Ca_Kabuli_Chr07</i>       | 12385785                       | (C/T)       |
| 12378       | CakSNP12378    | <i>Kabuli</i>    | <i>Ca_Kabuli_Chr07</i>       | 12390774                       | (G/A)       |
| 12379       | CakSNP12379    | <i>Kabuli</i>    | <i>Ca_Kabuli_Chr07</i>       | 12481556                       | (G/C)       |
| 12380       | CakSNP12380    | <i>Kabuli</i>    | <i>Ca_Kabuli_Chr07</i>       | 12481627                       | (A/C)       |
| 12381       | CakSNP12381    | <i>Kabuli</i>    | <i>Ca_Kabuli_Chr07</i>       | 12481715                       | (A/G)       |
| 12382       | CakSNP12382    | <i>Kabuli</i>    | <i>Ca_Kabuli_Chr07</i>       | 12481835                       | (C/T)       |
| 12383       | CakSNP12383    | <i>Kabuli</i>    | <i>Ca_Kabuli_Chr07</i>       | 12482851                       | (G/A)       |
| 12384       | CakSNP12384    | <i>Kabuli</i>    | <i>Ca_Kabuli_Chr07</i>       | 12482822                       | (A/G)       |
| 12385       | CakSNP12385    | <i>Kabuli</i>    | <i>Ca_Kabuli_Chr07</i>       | 12482953                       | (A/C)       |
| 12386       | CakSNP12386    | <i>Kabuli</i>    | <i>Ca_Kabuli_Chr07</i>       | 12483290                       | (A/C)       |
| 12387       | CakSNP12387    | <i>Kabuli</i>    | <i>Ca_Kabuli_Chr07</i>       | 12492075                       | (G/A)       |
| 12388       | CakSNP12388    | <i>Kabuli</i>    | <i>Ca_Kabuli_Chr07</i>       | 12492052                       | (C/T)       |
| 12389       | CakSNP12389    | <i>Kabuli</i>    | <i>Ca_Kabuli_Chr07</i>       | 12492046                       | (A/T)       |
| 12390       | CakSNP12390    | <i>Kabuli</i>    | <i>Ca_Kabuli_Chr07</i>       | 12616871                       | (T/C)       |
| 12391       | CakSNP12391    | <i>Kabuli</i>    | <i>Ca_Kabuli_Chr07</i>       | 12616870                       | (G/A)       |
| 12392       | CakSNP12392    | <i>Kabuli</i>    | <i>Ca_Kabuli_Chr07</i>       | 12616957                       | (C/T)       |
| 12393       | CakSNP12393    | <i>Kabuli</i>    | <i>Ca_Kabuli_Chr07</i>       | 12616937                       | (C/T)       |
| 12394       | CakSNP12394    | <i>Kabuli</i>    | <i>Ca_Kabuli_Chr07</i>       | 12623129                       | (T/C)       |
| 12395       | CakSNP12395    | <i>Kabuli</i>    | <i>Ca_Kabuli_Chr07</i>       | 12623128                       | (G/A)       |
| 12396       | CakSNP12396    | <i>Kabuli</i>    | <i>Ca_Kabuli_Chr07</i>       | 12623215                       | (C/T)       |
| 12397       | CakSNP12397    | <i>Kabuli</i>    | <i>Ca_Kabuli_Chr07</i>       | 12623195                       | (C/T)       |
| 12398       | CakSNP12398    | <i>Kabuli</i>    | <i>Ca_Kabuli_Chr07</i>       | 12628148                       | (A/G)       |
| 12399       | CakSNP12399    | <i>Kabuli</i>    | <i>Ca_Kabuli_Chr07</i>       | 12628211                       | (A/G)       |
| 12400       | CakSNP12400    | <i>Kabuli</i>    | <i>Ca_Kabuli_Chr07</i>       | 12628265                       | (T/A)       |

| <b>S.N.</b> | <b>SNP IDs</b> | <b>Cultivars</b> | <b>Chromosomes/scaffolds</b> | <b>Physical positions (bp)</b> | <b>SNPs</b> |
|-------------|----------------|------------------|------------------------------|--------------------------------|-------------|
| 12401       | CakSNP12401    | <i>Kabuli</i>    | <i>Ca_Kabuli_Chr07</i>       | 12629986                       | (A/G)       |
| 12402       | CakSNP12402    | <i>Kabuli</i>    | <i>Ca_Kabuli_Chr07</i>       | 12633590                       | (A/C)       |
| 12403       | CakSNP12403    | <i>Kabuli</i>    | <i>Ca_Kabuli_Chr07</i>       | 12633642                       | (T/G)       |
| 12404       | CakSNP12404    | <i>Kabuli</i>    | <i>Ca_Kabuli_Chr07</i>       | 12633643                       | (A/T)       |
| 12405       | CakSNP12405    | <i>Kabuli</i>    | <i>Ca_Kabuli_Chr07</i>       | 12681440                       | (T/C)       |
| 12406       | CakSNP12406    | <i>Kabuli</i>    | <i>Ca_Kabuli_Chr07</i>       | 12718820                       | (C/G)       |
| 12407       | CakSNP12407    | <i>Kabuli</i>    | <i>Ca_Kabuli_Chr07</i>       | 12718853                       | (G/A)       |
| 12408       | CakSNP12408    | <i>Kabuli</i>    | <i>Ca_Kabuli_Chr07</i>       | 12730600                       | (C/A)       |
| 12409       | CakSNP12409    | <i>Kabuli</i>    | <i>Ca_Kabuli_Chr07</i>       | 12737516                       | (T/C)       |
| 12410       | CakSNP12410    | <i>Kabuli</i>    | <i>Ca_Kabuli_Chr07</i>       | 12893655                       | (C/T)       |
| 12411       | CakSNP12411    | <i>Kabuli</i>    | <i>Ca_Kabuli_Chr07</i>       | 12895182                       | (A/G)       |
| 12412       | CakSNP12412    | <i>Kabuli</i>    | <i>Ca_Kabuli_Chr07</i>       | 12898640                       | (A/C)       |
| 12413       | CakSNP12413    | <i>Kabuli</i>    | <i>Ca_Kabuli_Chr07</i>       | 12898709                       | (T/A)       |
| 12414       | CakSNP12414    | <i>Kabuli</i>    | <i>Ca_Kabuli_Chr07</i>       | 12898707                       | (G/A)       |
| 12415       | CakSNP12415    | <i>Kabuli</i>    | <i>Ca_Kabuli_Chr07</i>       | 12899398                       | (T/C)       |
| 12416       | CakSNP12416    | <i>Kabuli</i>    | <i>Ca_Kabuli_Chr07</i>       | 12913811                       | (T/A)       |
| 12417       | CakSNP12417    | <i>Kabuli</i>    | <i>Ca_Kabuli_Chr07</i>       | 13020788                       | (C/T)       |
| 12418       | CakSNP12418    | <i>Kabuli</i>    | <i>Ca_Kabuli_Chr07</i>       | 13020772                       | (A/G)       |
| 12419       | CakSNP12419    | <i>Kabuli</i>    | <i>Ca_Kabuli_Chr07</i>       | 13021047                       | (A/G)       |
| 12420       | CakSNP12420    | <i>Kabuli</i>    | <i>Ca_Kabuli_Chr07</i>       | 13021030                       | (A/G)       |
| 12421       | CakSNP12421    | <i>Kabuli</i>    | <i>Ca_Kabuli_Chr07</i>       | 13059710                       | (C/A)       |
| 12422       | CakSNP12422    | <i>Kabuli</i>    | <i>Ca_Kabuli_Chr07</i>       | 13059712                       | (C/A)       |
| 12423       | CakSNP12423    | <i>Kabuli</i>    | <i>Ca_Kabuli_Chr07</i>       | 13059717                       | (T/A)       |
| 12424       | CakSNP12424    | <i>Kabuli</i>    | <i>Ca_Kabuli_Chr07</i>       | 13059852                       | (G/A)       |
| 12425       | CakSNP12425    | <i>Kabuli</i>    | <i>Ca_Kabuli_Chr07</i>       | 13172542                       | (A/G)       |
| 12426       | CakSNP12426    | <i>Kabuli</i>    | <i>Ca_Kabuli_Chr07</i>       | 13220439                       | (G/A)       |
| 12427       | CakSNP12427    | <i>Kabuli</i>    | <i>Ca_Kabuli_Chr07</i>       | 13220418                       | (A/G)       |
| 12428       | CakSNP12428    | <i>Kabuli</i>    | <i>Ca_Kabuli_Chr07</i>       | 13262430                       | (C/T)       |
| 12429       | CakSNP12429    | <i>Kabuli</i>    | <i>Ca_Kabuli_Chr07</i>       | 13281255                       | (T/C)       |
| 12430       | CakSNP12430    | <i>Kabuli</i>    | <i>Ca_Kabuli_Chr07</i>       | 13281290                       | (A/G)       |
| 12431       | CakSNP12431    | <i>Kabuli</i>    | <i>Ca_Kabuli_Chr07</i>       | 13281297                       | (C/G)       |
| 12432       | CakSNP12432    | <i>Kabuli</i>    | <i>Ca_Kabuli_Chr07</i>       | 13281307                       | (C/T)       |
| 12433       | CakSNP12433    | <i>Kabuli</i>    | <i>Ca_Kabuli_Chr07</i>       | 13281313                       | (T/C)       |
| 12434       | CakSNP12434    | <i>Kabuli</i>    | <i>Ca_Kabuli_Chr07</i>       | 13281314                       | (G/A)       |
| 12435       | CakSNP12435    | <i>Kabuli</i>    | <i>Ca_Kabuli_Chr07</i>       | 13281374                       | (G/T)       |
| 12436       | CakSNP12436    | <i>Kabuli</i>    | <i>Ca_Kabuli_Chr07</i>       | 13281351                       | (T/A)       |
| 12437       | CakSNP12437    | <i>Kabuli</i>    | <i>Ca_Kabuli_Chr07</i>       | 13288828                       | (G/A)       |
| 12438       | CakSNP12438    | <i>Kabuli</i>    | <i>Ca_Kabuli_Chr07</i>       | 13288813                       | (G/A)       |
| 12439       | CakSNP12439    | <i>Kabuli</i>    | <i>Ca_Kabuli_Chr07</i>       | 13288753                       | (A/C)       |



| <b>S.N.</b> | <b>SNP IDs</b> | <b>Cultivars</b> | <b>Chromosomes/scaffolds</b> | <b>Physical positions (bp)</b> | <b>SNPs</b> |
|-------------|----------------|------------------|------------------------------|--------------------------------|-------------|
| 12440       | CakSNP12440    | <i>Kabuli</i>    | <i>Ca_Kabuli_Chr07</i>       | 13319871                       | (A/G)       |
| 12441       | CakSNP12441    | <i>Kabuli</i>    | <i>Ca_Kabuli_Chr07</i>       | 13514074                       | (C/T)       |
| 12442       | CakSNP12442    | <i>Kabuli</i>    | <i>Ca_Kabuli_Chr07</i>       | 13605200                       | (A/C)       |
| 12443       | CakSNP12443    | <i>Kabuli</i>    | <i>Ca_Kabuli_Chr07</i>       | 13605191                       | (A/C)       |
| 12444       | CakSNP12444    | <i>Kabuli</i>    | <i>Ca_Kabuli_Chr07</i>       | 13605188                       | (A/C)       |
| 12445       | CakSNP12445    | <i>Kabuli</i>    | <i>Ca_Kabuli_Chr07</i>       | 13605578                       | (C/G)       |
| 12446       | CakSNP12446    | <i>Kabuli</i>    | <i>Ca_Kabuli_Chr07</i>       | 13667102                       | (C/T)       |
| 12447       | CakSNP12447    | <i>Kabuli</i>    | <i>Ca_Kabuli_Chr07</i>       | 13667103                       | (T/G)       |
| 12448       | CakSNP12448    | <i>Kabuli</i>    | <i>Ca_Kabuli_Chr07</i>       | 13730350                       | (A/C)       |
| 12449       | CakSNP12449    | <i>Kabuli</i>    | <i>Ca_Kabuli_Chr07</i>       | 13757159                       | (A/C)       |
| 12450       | CakSNP12450    | <i>Kabuli</i>    | <i>Ca_Kabuli_Chr07</i>       | 13776110                       | (A/C)       |
| 12451       | CakSNP12451    | <i>Kabuli</i>    | <i>Ca_Kabuli_Chr07</i>       | 13781815                       | (T/C)       |
| 12452       | CakSNP12452    | <i>Kabuli</i>    | <i>Ca_Kabuli_Chr07</i>       | 13819387                       | (C/T)       |
| 12453       | CakSNP12453    | <i>Kabuli</i>    | <i>Ca_Kabuli_Chr07</i>       | 13881348                       | (G/A)       |
| 12454       | CakSNP12454    | <i>Kabuli</i>    | <i>Ca_Kabuli_Chr07</i>       | 13893199                       | (T/C)       |
| 12455       | CakSNP12455    | <i>Kabuli</i>    | <i>Ca_Kabuli_Chr07</i>       | 13893344                       | (G/C)       |
| 12456       | CakSNP12456    | <i>Kabuli</i>    | <i>Ca_Kabuli_Chr07</i>       | 13893382                       | (G/T)       |
| 12457       | CakSNP12457    | <i>Kabuli</i>    | <i>Ca_Kabuli_Chr07</i>       | 13893383                       | (C/T)       |
| 12458       | CakSNP12458    | <i>Kabuli</i>    | <i>Ca_Kabuli_Chr07</i>       | 13903980                       | (T/G)       |
| 12459       | CakSNP12459    | <i>Kabuli</i>    | <i>Ca_Kabuli_Chr07</i>       | 13904163                       | (T/C)       |
| 12460       | CakSNP12460    | <i>Kabuli</i>    | <i>Ca_Kabuli_Chr07</i>       | 13913735                       | (A/G)       |
| 12461       | CakSNP12461    | <i>Kabuli</i>    | <i>Ca_Kabuli_Chr07</i>       | 13921214                       | (C/T)       |
| 12462       | CakSNP12462    | <i>Kabuli</i>    | <i>Ca_Kabuli_Chr07</i>       | 13921289                       | (T/C)       |
| 12463       | CakSNP12463    | <i>Kabuli</i>    | <i>Ca_Kabuli_Chr07</i>       | 13949259                       | (A/G)       |
| 12464       | CakSNP12464    | <i>Kabuli</i>    | <i>Ca_Kabuli_Chr07</i>       | 13949314                       | (G/A)       |
| 12465       | CakSNP12465    | <i>Kabuli</i>    | <i>Ca_Kabuli_Chr07</i>       | 13951874                       | (T/C)       |
| 12466       | CakSNP12466    | <i>Kabuli</i>    | <i>Ca_Kabuli_Chr07</i>       | 13951856                       | (T/C)       |
| 12467       | CakSNP12467    | <i>Kabuli</i>    | <i>Ca_Kabuli_Chr07</i>       | 14030136                       | (C/T)       |
| 12468       | CakSNP12468    | <i>Kabuli</i>    | <i>Ca_Kabuli_Chr07</i>       | 14051146                       | (G/T)       |
| 12469       | CakSNP12469    | <i>Kabuli</i>    | <i>Ca_Kabuli_Chr07</i>       | 14179629                       | (T/G)       |
| 12470       | CakSNP12470    | <i>Kabuli</i>    | <i>Ca_Kabuli_Chr07</i>       | 14179733                       | (C/A)       |
| 12471       | CakSNP12471    | <i>Kabuli</i>    | <i>Ca_Kabuli_Chr07</i>       | 14212570                       | (C/A)       |
| 12472       | CakSNP12472    | <i>Kabuli</i>    | <i>Ca_Kabuli_Chr07</i>       | 14212597                       | (C/G)       |
| 12473       | CakSNP12473    | <i>Kabuli</i>    | <i>Ca_Kabuli_Chr07</i>       | 14233343                       | (T/G)       |
| 12474       | CakSNP12474    | <i>Kabuli</i>    | <i>Ca_Kabuli_Chr07</i>       | 14233368                       | (T/C)       |
| 12475       | CakSNP12475    | <i>Kabuli</i>    | <i>Ca_Kabuli_Chr07</i>       | 14281993                       | (G/T)       |
| 12476       | CakSNP12476    | <i>Kabuli</i>    | <i>Ca_Kabuli_Chr07</i>       | 14282088                       | (T/C)       |
| 12477       | CakSNP12477    | <i>Kabuli</i>    | <i>Ca_Kabuli_Chr07</i>       | 14320216                       | (T/C)       |
| 12478       | CakSNP12478    | <i>Kabuli</i>    | <i>Ca_Kabuli_Chr07</i>       | 14328655                       | (T/C)       |

| <b>S.N.</b> | <b>SNP IDs</b> | <b>Cultivars</b> | <b>Chromosomes/scaffolds</b> | <b>Physical positions (bp)</b> | <b>SNPs</b> |
|-------------|----------------|------------------|------------------------------|--------------------------------|-------------|
| 12479       | CakSNP12479    | <i>Kabuli</i>    | <i>Ca_Kabuli_Chr07</i>       | 14328649                       | (T/C)       |
| 12480       | CakSNP12480    | <i>Kabuli</i>    | <i>Ca_Kabuli_Chr07</i>       | 14329126                       | (C/T)       |
| 12481       | CakSNP12481    | <i>Kabuli</i>    | <i>Ca_Kabuli_Chr07</i>       | 14329175                       | (G/A)       |
| 12482       | CakSNP12482    | <i>Kabuli</i>    | <i>Ca_Kabuli_Chr07</i>       | 14329196                       | (G/A)       |
| 12483       | CakSNP12483    | <i>Kabuli</i>    | <i>Ca_Kabuli_Chr07</i>       | 14329217                       | (C/T)       |
| 12484       | CakSNP12484    | <i>Kabuli</i>    | <i>Ca_Kabuli_Chr07</i>       | 14329167                       | (A/T)       |
| 12485       | CakSNP12485    | <i>Kabuli</i>    | <i>Ca_Kabuli_Chr07</i>       | 14345827                       | (T/C)       |
| 12486       | CakSNP12486    | <i>Kabuli</i>    | <i>Ca_Kabuli_Chr07</i>       | 14345799                       | (T/A)       |
| 12487       | CakSNP12487    | <i>Kabuli</i>    | <i>Ca_Kabuli_Chr07</i>       | 14470549                       | (C/G)       |
| 12488       | CakSNP12488    | <i>Kabuli</i>    | <i>Ca_Kabuli_Chr07</i>       | 14518292                       | (A/T)       |
| 12489       | CakSNP12489    | <i>Kabuli</i>    | <i>Ca_Kabuli_Chr07</i>       | 14526546                       | (A/G)       |
| 12490       | CakSNP12490    | <i>Kabuli</i>    | <i>Ca_Kabuli_Chr07</i>       | 14526495                       | (T/C)       |
| 12491       | CakSNP12491    | <i>Kabuli</i>    | <i>Ca_Kabuli_Chr07</i>       | 14526493                       | (C/T)       |
| 12492       | CakSNP12492    | <i>Kabuli</i>    | <i>Ca_Kabuli_Chr07</i>       | 14526480                       | (T/C)       |
| 12493       | CakSNP12493    | <i>Kabuli</i>    | <i>Ca_Kabuli_Chr07</i>       | 14526478                       | (G/C)       |
| 12494       | CakSNP12494    | <i>Kabuli</i>    | <i>Ca_Kabuli_Chr07</i>       | 14558741                       | (C/A)       |
| 12495       | CakSNP12495    | <i>Kabuli</i>    | <i>Ca_Kabuli_Chr07</i>       | 14558785                       | (C/T)       |
| 12496       | CakSNP12496    | <i>Kabuli</i>    | <i>Ca_Kabuli_Chr07</i>       | 14559033                       | (G/A)       |
| 12497       | CakSNP12497    | <i>Kabuli</i>    | <i>Ca_Kabuli_Chr07</i>       | 14666535                       | (T/A)       |
| 12498       | CakSNP12498    | <i>Kabuli</i>    | <i>Ca_Kabuli_Chr07</i>       | 14668939                       | (G/A)       |
| 12499       | CakSNP12499    | <i>Kabuli</i>    | <i>Ca_Kabuli_Chr07</i>       | 14668922                       | (A/C)       |
| 12500       | CakSNP12500    | <i>Kabuli</i>    | <i>Ca_Kabuli_Chr07</i>       | 14685011                       | (G/C)       |
| 12501       | CakSNP12501    | <i>Kabuli</i>    | <i>Ca_Kabuli_Chr07</i>       | 14685017                       | (C/T)       |
| 12502       | CakSNP12502    | <i>Kabuli</i>    | <i>Ca_Kabuli_Chr07</i>       | 14685024                       | (A/G)       |
| 12503       | CakSNP12503    | <i>Kabuli</i>    | <i>Ca_Kabuli_Chr07</i>       | 14685034                       | (T/G)       |
| 12504       | CakSNP12504    | <i>Kabuli</i>    | <i>Ca_Kabuli_Chr07</i>       | 14712518                       | (C/A)       |
| 12505       | CakSNP12505    | <i>Kabuli</i>    | <i>Ca_Kabuli_Chr07</i>       | 14712568                       | (C/A)       |
| 12506       | CakSNP12506    | <i>Kabuli</i>    | <i>Ca_Kabuli_Chr07</i>       | 14712596                       | (T/C)       |
| 12507       | CakSNP12507    | <i>Kabuli</i>    | <i>Ca_Kabuli_Chr07</i>       | 14712601                       | (C/T)       |
| 12508       | CakSNP12508    | <i>Kabuli</i>    | <i>Ca_Kabuli_Chr07</i>       | 14748257                       | (T/A)       |
| 12509       | CakSNP12509    | <i>Kabuli</i>    | <i>Ca_Kabuli_Chr07</i>       | 14775135                       | (C/G)       |
| 12510       | CakSNP12510    | <i>Kabuli</i>    | <i>Ca_Kabuli_Chr07</i>       | 14782453                       | (A/G)       |
| 12511       | CakSNP12511    | <i>Kabuli</i>    | <i>Ca_Kabuli_Chr07</i>       | 14899028                       | (C/A)       |
| 12512       | CakSNP12512    | <i>Kabuli</i>    | <i>Ca_Kabuli_Chr07</i>       | 14899101                       | (T/C)       |
| 12513       | CakSNP12513    | <i>Kabuli</i>    | <i>Ca_Kabuli_Chr07</i>       | 14933294                       | (T/C)       |
| 12514       | CakSNP12514    | <i>Kabuli</i>    | <i>Ca_Kabuli_Chr07</i>       | 14933286                       | (G/A)       |
| 12515       | CakSNP12515    | <i>Kabuli</i>    | <i>Ca_Kabuli_Chr07</i>       | 14983364                       | (T/G)       |
| 12516       | CakSNP12516    | <i>Kabuli</i>    | <i>Ca_Kabuli_Chr07</i>       | 14997794                       | (G/A)       |
| 12517       | CakSNP12517    | <i>Kabuli</i>    | <i>Ca_Kabuli_Chr07</i>       | 14997883                       | (T/C)       |

| <b>S.N.</b> | <b>SNP IDs</b> | <b>Cultivars</b> | <b>Chromosomes/scaffolds</b> | <b>Physical positions (bp)</b> | <b>SNPs</b> |
|-------------|----------------|------------------|------------------------------|--------------------------------|-------------|
| 12518       | CakSNP12518    | <i>Kabuli</i>    | <i>Ca_Kabuli_Chr07</i>       | 15028182                       | (T/G)       |
| 12519       | CakSNP12519    | <i>Kabuli</i>    | <i>Ca_Kabuli_Chr07</i>       | 15039606                       | (T/A)       |
| 12520       | CakSNP12520    | <i>Kabuli</i>    | <i>Ca_Kabuli_Chr07</i>       | 15069817                       | (G/A)       |
| 12521       | CakSNP12521    | <i>Kabuli</i>    | <i>Ca_Kabuli_Chr07</i>       | 15070091                       | (T/A)       |
| 12522       | CakSNP12522    | <i>Kabuli</i>    | <i>Ca_Kabuli_Chr07</i>       | 15119205                       | (T/C)       |
| 12523       | CakSNP12523    | <i>Kabuli</i>    | <i>Ca_Kabuli_Chr07</i>       | 15125638                       | (G/C)       |
| 12524       | CakSNP12524    | <i>Kabuli</i>    | <i>Ca_Kabuli_Chr07</i>       | 15125619                       | (T/G)       |
| 12525       | CakSNP12525    | <i>Kabuli</i>    | <i>Ca_Kabuli_Chr07</i>       | 15185603                       | (A/G)       |
| 12526       | CakSNP12526    | <i>Kabuli</i>    | <i>Ca_Kabuli_Chr07</i>       | 15201600                       | (A/G)       |
| 12527       | CakSNP12527    | <i>Kabuli</i>    | <i>Ca_Kabuli_Chr07</i>       | 15399421                       | (T/C)       |
| 12528       | CakSNP12528    | <i>Kabuli</i>    | <i>Ca_Kabuli_Chr07</i>       | 15441316                       | (A/T)       |
| 12529       | CakSNP12529    | <i>Kabuli</i>    | <i>Ca_Kabuli_Chr07</i>       | 15463183                       | (G/T)       |
| 12530       | CakSNP12530    | <i>Kabuli</i>    | <i>Ca_Kabuli_Chr07</i>       | 15463170                       | (G/A)       |
| 12531       | CakSNP12531    | <i>Kabuli</i>    | <i>Ca_Kabuli_Chr07</i>       | 15463169                       | (G/A)       |
| 12532       | CakSNP12532    | <i>Kabuli</i>    | <i>Ca_Kabuli_Chr07</i>       | 15530329                       | (G/T)       |
| 12533       | CakSNP12533    | <i>Kabuli</i>    | <i>Ca_Kabuli_Chr07</i>       | 15530316                       | (G/A)       |
| 12534       | CakSNP12534    | <i>Kabuli</i>    | <i>Ca_Kabuli_Chr07</i>       | 15530315                       | (G/A)       |
| 12535       | CakSNP12535    | <i>Kabuli</i>    | <i>Ca_Kabuli_Chr07</i>       | 15568060                       | (G/T)       |
| 12536       | CakSNP12536    | <i>Kabuli</i>    | <i>Ca_Kabuli_Chr07</i>       | 15568047                       | (G/A)       |
| 12537       | CakSNP12537    | <i>Kabuli</i>    | <i>Ca_Kabuli_Chr07</i>       | 15568046                       | (G/A)       |
| 12538       | CakSNP12538    | <i>Kabuli</i>    | <i>Ca_Kabuli_Chr07</i>       | 15622247                       | (G/A)       |
| 12539       | CakSNP12539    | <i>Kabuli</i>    | <i>Ca_Kabuli_Chr07</i>       | 15622245                       | (T/A)       |
| 12540       | CakSNP12540    | <i>Kabuli</i>    | <i>Ca_Kabuli_Chr07</i>       | 15762068                       | (A/T)       |
| 12541       | CakSNP12541    | <i>Kabuli</i>    | <i>Ca_Kabuli_Chr07</i>       | 15826588                       | (A/C)       |
| 12542       | CakSNP12542    | <i>Kabuli</i>    | <i>Ca_Kabuli_Chr07</i>       | 15856789                       | (A/G)       |
| 12543       | CakSNP12543    | <i>Kabuli</i>    | <i>Ca_Kabuli_Chr07</i>       | 15856955                       | (T/G)       |
| 12544       | CakSNP12544    | <i>Kabuli</i>    | <i>Ca_Kabuli_Chr07</i>       | 15860298                       | (T/C)       |
| 12545       | CakSNP12545    | <i>Kabuli</i>    | <i>Ca_Kabuli_Chr07</i>       | 15887790                       | (T/C)       |
| 12546       | CakSNP12546    | <i>Kabuli</i>    | <i>Ca_Kabuli_Chr07</i>       | 15966680                       | (A/G)       |
| 12547       | CakSNP12547    | <i>Kabuli</i>    | <i>Ca_Kabuli_Chr07</i>       | 15966714                       | (G/A)       |
| 12548       | CakSNP12548    | <i>Kabuli</i>    | <i>Ca_Kabuli_Chr07</i>       | 16008746                       | (T/C)       |
| 12549       | CakSNP12549    | <i>Kabuli</i>    | <i>Ca_Kabuli_Chr07</i>       | 16008733                       | (A/G)       |
| 12550       | CakSNP12550    | <i>Kabuli</i>    | <i>Ca_Kabuli_Chr07</i>       | 16289811                       | (C/T)       |
| 12551       | CakSNP12551    | <i>Kabuli</i>    | <i>Ca_Kabuli_Chr07</i>       | 16289802                       | (C/T)       |
| 12552       | CakSNP12552    | <i>Kabuli</i>    | <i>Ca_Kabuli_Chr07</i>       | 16289794                       | (G/T)       |
| 12553       | CakSNP12553    | <i>Kabuli</i>    | <i>Ca_Kabuli_Chr07</i>       | 16324985                       | (T/C)       |
| 12554       | CakSNP12554    | <i>Kabuli</i>    | <i>Ca_Kabuli_Chr07</i>       | 16331943                       | (A/G)       |
| 12555       | CakSNP12555    | <i>Kabuli</i>    | <i>Ca_Kabuli_Chr07</i>       | 16381854                       | (T/C)       |
| 12556       | CakSNP12556    | <i>Kabuli</i>    | <i>Ca_Kabuli_Chr07</i>       | 16381891                       | (T/G)       |

| <b>S.N.</b> | <b>SNP IDs</b> | <b>Cultivars</b> | <b>Chromosomes/scaffolds</b> | <b>Physical positions (bp)</b> | <b>SNPs</b> |
|-------------|----------------|------------------|------------------------------|--------------------------------|-------------|
| 12557       | CakSNP12557    | <i>Kabuli</i>    | <i>Ca_Kabuli_Chr07</i>       | 16381934                       | (T/C)       |
| 12558       | CakSNP12558    | <i>Kabuli</i>    | <i>Ca_Kabuli_Chr07</i>       | 16466619                       | (T/C)       |
| 12559       | CakSNP12559    | <i>Kabuli</i>    | <i>Ca_Kabuli_Chr07</i>       | 16581695                       | (C/G)       |
| 12560       | CakSNP12560    | <i>Kabuli</i>    | <i>Ca_Kabuli_Chr07</i>       | 16626047                       | (T/G)       |
| 12561       | CakSNP12561    | <i>Kabuli</i>    | <i>Ca_Kabuli_Chr07</i>       | 16626703                       | (A/G)       |
| 12562       | CakSNP12562    | <i>Kabuli</i>    | <i>Ca_Kabuli_Chr07</i>       | 16665577                       | (A/G)       |
| 12563       | CakSNP12563    | <i>Kabuli</i>    | <i>Ca_Kabuli_Chr07</i>       | 16735437                       | (G/A)       |
| 12564       | CakSNP12564    | <i>Kabuli</i>    | <i>Ca_Kabuli_Chr07</i>       | 16735427                       | (A/G)       |
| 12565       | CakSNP12565    | <i>Kabuli</i>    | <i>Ca_Kabuli_Chr07</i>       | 16735423                       | (G/C)       |
| 12566       | CakSNP12566    | <i>Kabuli</i>    | <i>Ca_Kabuli_Chr07</i>       | 16816296                       | (G/C)       |
| 12567       | CakSNP12567    | <i>Kabuli</i>    | <i>Ca_Kabuli_Chr07</i>       | 16821274                       | (A/C)       |
| 12568       | CakSNP12568    | <i>Kabuli</i>    | <i>Ca_Kabuli_Chr07</i>       | 16829081                       | (C/A)       |
| 12569       | CakSNP12569    | <i>Kabuli</i>    | <i>Ca_Kabuli_Chr07</i>       | 16897329                       | (A/C)       |
| 12570       | CakSNP12570    | <i>Kabuli</i>    | <i>Ca_Kabuli_Chr07</i>       | 16897285                       | (T/C)       |
| 12571       | CakSNP12571    | <i>Kabuli</i>    | <i>Ca_Kabuli_Chr07</i>       | 16936123                       | (C/G)       |
| 12572       | CakSNP12572    | <i>Kabuli</i>    | <i>Ca_Kabuli_Chr07</i>       | 17017466                       | (C/G)       |
| 12573       | CakSNP12573    | <i>Kabuli</i>    | <i>Ca_Kabuli_Chr07</i>       | 17017453                       | (A/G)       |
| 12574       | CakSNP12574    | <i>Kabuli</i>    | <i>Ca_Kabuli_Chr07</i>       | 17017447                       | (A/G)       |
| 12575       | CakSNP12575    | <i>Kabuli</i>    | <i>Ca_Kabuli_Chr07</i>       | 17017438                       | (A/T)       |
| 12576       | CakSNP12576    | <i>Kabuli</i>    | <i>Ca_Kabuli_Chr07</i>       | 17017421                       | (G/A)       |
| 12577       | CakSNP12577    | <i>Kabuli</i>    | <i>Ca_Kabuli_Chr07</i>       | 17017418                       | (T/G)       |
| 12578       | CakSNP12578    | <i>Kabuli</i>    | <i>Ca_Kabuli_Chr07</i>       | 17038317                       | (G/A)       |
| 12579       | CakSNP12579    | <i>Kabuli</i>    | <i>Ca_Kabuli_Chr07</i>       | 17064968                       | (T/C)       |
| 12580       | CakSNP12580    | <i>Kabuli</i>    | <i>Ca_Kabuli_Chr07</i>       | 17088603                       | (A/G)       |
| 12581       | CakSNP12581    | <i>Kabuli</i>    | <i>Ca_Kabuli_Chr07</i>       | 17140664                       | (C/T)       |
| 12582       | CakSNP12582    | <i>Kabuli</i>    | <i>Ca_Kabuli_Chr07</i>       | 17178847                       | (A/C)       |
| 12583       | CakSNP12583    | <i>Kabuli</i>    | <i>Ca_Kabuli_Chr07</i>       | 17181160                       | (G/C)       |
| 12584       | CakSNP12584    | <i>Kabuli</i>    | <i>Ca_Kabuli_Chr07</i>       | 17228904                       | (T/G)       |
| 12585       | CakSNP12585    | <i>Kabuli</i>    | <i>Ca_Kabuli_Chr07</i>       | 17318174                       | (G/T)       |
| 12586       | CakSNP12586    | <i>Kabuli</i>    | <i>Ca_Kabuli_Chr07</i>       | 17539110                       | (G/A)       |
| 12587       | CakSNP12587    | <i>Kabuli</i>    | <i>Ca_Kabuli_Chr07</i>       | 17539136                       | (C/A)       |
| 12588       | CakSNP12588    | <i>Kabuli</i>    | <i>Ca_Kabuli_Chr07</i>       | 17539207                       | (G/A)       |
| 12589       | CakSNP12589    | <i>Kabuli</i>    | <i>Ca_Kabuli_Chr07</i>       | 17586154                       | (C/T)       |
| 12590       | CakSNP12590    | <i>Kabuli</i>    | <i>Ca_Kabuli_Chr07</i>       | 17591798                       | (T/A)       |
| 12591       | CakSNP12591    | <i>Kabuli</i>    | <i>Ca_Kabuli_Chr07</i>       | 17591781                       | (G/A)       |
| 12592       | CakSNP12592    | <i>Kabuli</i>    | <i>Ca_Kabuli_Chr07</i>       | 17591843                       | (G/T)       |
| 12593       | CakSNP12593    | <i>Kabuli</i>    | <i>Ca_Kabuli_Chr07</i>       | 17591974                       | (A/G)       |
| 12594       | CakSNP12594    | <i>Kabuli</i>    | <i>Ca_Kabuli_Chr07</i>       | 17591971                       | (A/G)       |
| 12595       | CakSNP12595    | <i>Kabuli</i>    | <i>Ca_Kabuli_Chr07</i>       | 17591924                       | (T/C)       |

| <b>S.N.</b> | <b>SNP IDs</b> | <b>Cultivars</b> | <b>Chromosomes/scaffolds</b> | <b>Physical positions (bp)</b> | <b>SNPs</b> |
|-------------|----------------|------------------|------------------------------|--------------------------------|-------------|
| 12596       | CakSNP12596    | <i>Kabuli</i>    | <i>Ca_Kabuli_Chr07</i>       | 17592701                       | (C/A)       |
| 12597       | CakSNP12597    | <i>Kabuli</i>    | <i>Ca_Kabuli_Chr07</i>       | 17597348                       | (T/C)       |
| 12598       | CakSNP12598    | <i>Kabuli</i>    | <i>Ca_Kabuli_Chr07</i>       | 17597421                       | (A/G)       |
| 12599       | CakSNP12599    | <i>Kabuli</i>    | <i>Ca_Kabuli_Chr07</i>       | 17597420                       | (C/T)       |
| 12600       | CakSNP12600    | <i>Kabuli</i>    | <i>Ca_Kabuli_Chr07</i>       | 17624143                       | (G/A)       |
| 12601       | CakSNP12601    | <i>Kabuli</i>    | <i>Ca_Kabuli_Chr07</i>       | 17624225                       | (T/C)       |
| 12602       | CakSNP12602    | <i>Kabuli</i>    | <i>Ca_Kabuli_Chr07</i>       | 17766520                       | (T/C)       |
| 12603       | CakSNP12603    | <i>Kabuli</i>    | <i>Ca_Kabuli_Chr07</i>       | 17766952                       | (T/A)       |
| 12604       | CakSNP12604    | <i>Kabuli</i>    | <i>Ca_Kabuli_Chr07</i>       | 17766914                       | (C/A)       |
| 12605       | CakSNP12605    | <i>Kabuli</i>    | <i>Ca_Kabuli_Chr07</i>       | 17779414                       | (A/G)       |
| 12606       | CakSNP12606    | <i>Kabuli</i>    | <i>Ca_Kabuli_Chr07</i>       | 17779594                       | (T/C)       |
| 12607       | CakSNP12607    | <i>Kabuli</i>    | <i>Ca_Kabuli_Chr07</i>       | 17779700                       | (A/T)       |
| 12608       | CakSNP12608    | <i>Kabuli</i>    | <i>Ca_Kabuli_Chr07</i>       | 17782558                       | (C/T)       |
| 12609       | CakSNP12609    | <i>Kabuli</i>    | <i>Ca_Kabuli_Chr07</i>       | 18011604                       | (G/C)       |
| 12610       | CakSNP12610    | <i>Kabuli</i>    | <i>Ca_Kabuli_Chr07</i>       | 18090289                       | (T/A)       |
| 12611       | CakSNP12611    | <i>Kabuli</i>    | <i>Ca_Kabuli_Chr07</i>       | 18265803                       | (A/C)       |
| 12612       | CakSNP12612    | <i>Kabuli</i>    | <i>Ca_Kabuli_Chr07</i>       | 18265791                       | (G/C)       |
| 12613       | CakSNP12613    | <i>Kabuli</i>    | <i>Ca_Kabuli_Chr07</i>       | 18265782                       | (G/C)       |
| 12614       | CakSNP12614    | <i>Kabuli</i>    | <i>Ca_Kabuli_Chr07</i>       | 18319049                       | (T/G)       |
| 12615       | CakSNP12615    | <i>Kabuli</i>    | <i>Ca_Kabuli_Chr07</i>       | 18319073                       | (T/G)       |
| 12616       | CakSNP12616    | <i>Kabuli</i>    | <i>Ca_Kabuli_Chr07</i>       | 18365218                       | (G/A)       |
| 12617       | CakSNP12617    | <i>Kabuli</i>    | <i>Ca_Kabuli_Chr07</i>       | 18430468                       | (C/T)       |
| 12618       | CakSNP12618    | <i>Kabuli</i>    | <i>Ca_Kabuli_Chr07</i>       | 18469372                       | (G/A)       |
| 12619       | CakSNP12619    | <i>Kabuli</i>    | <i>Ca_Kabuli_Chr07</i>       | 18469422                       | (C/T)       |
| 12620       | CakSNP12620    | <i>Kabuli</i>    | <i>Ca_Kabuli_Chr07</i>       | 18638565                       | (A/G)       |
| 12621       | CakSNP12621    | <i>Kabuli</i>    | <i>Ca_Kabuli_Chr07</i>       | 18642538                       | (A/G)       |
| 12622       | CakSNP12622    | <i>Kabuli</i>    | <i>Ca_Kabuli_Chr07</i>       | 18658563                       | (C/G)       |
| 12623       | CakSNP12623    | <i>Kabuli</i>    | <i>Ca_Kabuli_Chr07</i>       | 18696645                       | (G/A)       |
| 12624       | CakSNP12624    | <i>Kabuli</i>    | <i>Ca_Kabuli_Chr07</i>       | 18796748                       | (T/C)       |
| 12625       | CakSNP12625    | <i>Kabuli</i>    | <i>Ca_Kabuli_Chr07</i>       | 18796768                       | (A/G)       |
| 12626       | CakSNP12626    | <i>Kabuli</i>    | <i>Ca_Kabuli_Chr07</i>       | 18910468                       | (A/G)       |
| 12627       | CakSNP12627    | <i>Kabuli</i>    | <i>Ca_Kabuli_Chr07</i>       | 19042183                       | (C/T)       |
| 12628       | CakSNP12628    | <i>Kabuli</i>    | <i>Ca_Kabuli_Chr07</i>       | 19189737                       | (A/C)       |
| 12629       | CakSNP12629    | <i>Kabuli</i>    | <i>Ca_Kabuli_Chr07</i>       | 19217501                       | (A/C)       |
| 12630       | CakSNP12630    | <i>Kabuli</i>    | <i>Ca_Kabuli_Chr07</i>       | 19217598                       | (G/C)       |
| 12631       | CakSNP12631    | <i>Kabuli</i>    | <i>Ca_Kabuli_Chr07</i>       | 19232818                       | (T/A)       |
| 12632       | CakSNP12632    | <i>Kabuli</i>    | <i>Ca_Kabuli_Chr07</i>       | 19290521                       | (G/A)       |
| 12633       | CakSNP12633    | <i>Kabuli</i>    | <i>Ca_Kabuli_Chr07</i>       | 19470527                       | (T/C)       |
| 12634       | CakSNP12634    | <i>Kabuli</i>    | <i>Ca_Kabuli_Chr07</i>       | 19472719                       | (G/A)       |

| <b>S.N.</b> | <b>SNP IDs</b> | <b>Cultivars</b> | <b>Chromosomes/scaffolds</b> | <b>Physical positions (bp)</b> | <b>SNPs</b> |
|-------------|----------------|------------------|------------------------------|--------------------------------|-------------|
| 12635       | CakSNP12635    | <i>Kabuli</i>    | <i>Ca_Kabuli_Chr07</i>       | 19472689                       | (T/A)       |
| 12636       | CakSNP12636    | <i>Kabuli</i>    | <i>Ca_Kabuli_Chr07</i>       | 19542901                       | (A/G)       |
| 12637       | CakSNP12637    | <i>Kabuli</i>    | <i>Ca_Kabuli_Chr07</i>       | 19549636                       | (C/T)       |
| 12638       | CakSNP12638    | <i>Kabuli</i>    | <i>Ca_Kabuli_Chr07</i>       | 19707812                       | (T/A)       |
| 12639       | CakSNP12639    | <i>Kabuli</i>    | <i>Ca_Kabuli_Chr07</i>       | 19707842                       | (G/A)       |
| 12640       | CakSNP12640    | <i>Kabuli</i>    | <i>Ca_Kabuli_Chr07</i>       | 19818789                       | (C/A)       |
| 12641       | CakSNP12641    | <i>Kabuli</i>    | <i>Ca_Kabuli_Chr07</i>       | 19818770                       | (T/C)       |
| 12642       | CakSNP12642    | <i>Kabuli</i>    | <i>Ca_Kabuli_Chr07</i>       | 19818759                       | (G/C)       |
| 12643       | CakSNP12643    | <i>Kabuli</i>    | <i>Ca_Kabuli_Chr07</i>       | 19818757                       | (G/C)       |
| 12644       | CakSNP12644    | <i>Kabuli</i>    | <i>Ca_Kabuli_Chr07</i>       | 20031805                       | (T/C)       |
| 12645       | CakSNP12645    | <i>Kabuli</i>    | <i>Ca_Kabuli_Chr07</i>       | 20032205                       | (A/C)       |
| 12646       | CakSNP12646    | <i>Kabuli</i>    | <i>Ca_Kabuli_Chr07</i>       | 20082842                       | (T/C)       |
| 12647       | CakSNP12647    | <i>Kabuli</i>    | <i>Ca_Kabuli_Chr07</i>       | 20083040                       | (A/T)       |
| 12648       | CakSNP12648    | <i>Kabuli</i>    | <i>Ca_Kabuli_Chr07</i>       | 20099384                       | (C/T)       |
| 12649       | CakSNP12649    | <i>Kabuli</i>    | <i>Ca_Kabuli_Chr07</i>       | 20111019                       | (T/C)       |
| 12650       | CakSNP12650    | <i>Kabuli</i>    | <i>Ca_Kabuli_Chr07</i>       | 20111123                       | (T/C)       |
| 12651       | CakSNP12651    | <i>Kabuli</i>    | <i>Ca_Kabuli_Chr07</i>       | 20112897                       | (G/A)       |
| 12652       | CakSNP12652    | <i>Kabuli</i>    | <i>Ca_Kabuli_Chr07</i>       | 20135647                       | (C/G)       |
| 12653       | CakSNP12653    | <i>Kabuli</i>    | <i>Ca_Kabuli_Chr07</i>       | 20168870                       | (T/A)       |
| 12654       | CakSNP12654    | <i>Kabuli</i>    | <i>Ca_Kabuli_Chr07</i>       | 20252133                       | (T/C)       |
| 12655       | CakSNP12655    | <i>Kabuli</i>    | <i>Ca_Kabuli_Chr07</i>       | 20252134                       | (G/A)       |
| 12656       | CakSNP12656    | <i>Kabuli</i>    | <i>Ca_Kabuli_Chr07</i>       | 20252135                       | (A/G)       |
| 12657       | CakSNP12657    | <i>Kabuli</i>    | <i>Ca_Kabuli_Chr07</i>       | 20252144                       | (G/A)       |
| 12658       | CakSNP12658    | <i>Kabuli</i>    | <i>Ca_Kabuli_Chr07</i>       | 20252145                       | (A/G)       |
| 12659       | CakSNP12659    | <i>Kabuli</i>    | <i>Ca_Kabuli_Chr07</i>       | 20252181                       | (C/T)       |
| 12660       | CakSNP12660    | <i>Kabuli</i>    | <i>Ca_Kabuli_Chr07</i>       | 20252192                       | (G/A)       |
| 12661       | CakSNP12661    | <i>Kabuli</i>    | <i>Ca_Kabuli_Chr07</i>       | 20252201                       | (C/A)       |
| 12662       | CakSNP12662    | <i>Kabuli</i>    | <i>Ca_Kabuli_Chr07</i>       | 20252212                       | (C/T)       |
| 12663       | CakSNP12663    | <i>Kabuli</i>    | <i>Ca_Kabuli_Chr07</i>       | 20252214                       | (C/G)       |
| 12664       | CakSNP12664    | <i>Kabuli</i>    | <i>Ca_Kabuli_Chr07</i>       | 20252236                       | (G/A)       |
| 12665       | CakSNP12665    | <i>Kabuli</i>    | <i>Ca_Kabuli_Chr07</i>       | 20252234                       | (A/C)       |
| 12666       | CakSNP12666    | <i>Kabuli</i>    | <i>Ca_Kabuli_Chr07</i>       | 20252233                       | (C/T)       |
| 12667       | CakSNP12667    | <i>Kabuli</i>    | <i>Ca_Kabuli_Chr07</i>       | 20252221                       | (T/C)       |
| 12668       | CakSNP12668    | <i>Kabuli</i>    | <i>Ca_Kabuli_Chr07</i>       | 20252209                       | (G/A)       |
| 12669       | CakSNP12669    | <i>Kabuli</i>    | <i>Ca_Kabuli_Chr07</i>       | 20252309                       | (C/T)       |
| 12670       | CakSNP12670    | <i>Kabuli</i>    | <i>Ca_Kabuli_Chr07</i>       | 20252334                       | (A/T)       |
| 12671       | CakSNP12671    | <i>Kabuli</i>    | <i>Ca_Kabuli_Chr07</i>       | 20252340                       | (A/G)       |
| 12672       | CakSNP12672    | <i>Kabuli</i>    | <i>Ca_Kabuli_Chr07</i>       | 20362883                       | (G/A)       |
| 12673       | CakSNP12673    | <i>Kabuli</i>    | <i>Ca_Kabuli_Chr07</i>       | 20362879                       | (C/T)       |

| <b>S.N.</b> | <b>SNP IDs</b> | <b>Cultivars</b> | <b>Chromosomes/scaffolds</b> | <b>Physical positions (bp)</b> | <b>SNPs</b> |
|-------------|----------------|------------------|------------------------------|--------------------------------|-------------|
| 12674       | CakSNP12674    | <i>Kabuli</i>    | <i>Ca_Kabuli_Chr07</i>       | 20362876                       | (G/A)       |
| 12675       | CakSNP12675    | <i>Kabuli</i>    | <i>Ca_Kabuli_Chr07</i>       | 20362838                       | (T/C)       |
| 12676       | CakSNP12676    | <i>Kabuli</i>    | <i>Ca_Kabuli_Chr07</i>       | 20414653                       | (G/A)       |
| 12677       | CakSNP12677    | <i>Kabuli</i>    | <i>Ca_Kabuli_Chr07</i>       | 20414703                       | (C/A)       |
| 12678       | CakSNP12678    | <i>Kabuli</i>    | <i>Ca_Kabuli_Chr07</i>       | 20486247                       | (T/G)       |
| 12679       | CakSNP12679    | <i>Kabuli</i>    | <i>Ca_Kabuli_Chr07</i>       | 20486280                       | (G/C)       |
| 12680       | CakSNP12680    | <i>Kabuli</i>    | <i>Ca_Kabuli_Chr07</i>       | 20496378                       | (G/A)       |
| 12681       | CakSNP12681    | <i>Kabuli</i>    | <i>Ca_Kabuli_Chr07</i>       | 20496303                       | (C/T)       |
| 12682       | CakSNP12682    | <i>Kabuli</i>    | <i>Ca_Kabuli_Chr07</i>       | 20496438                       | (C/T)       |
| 12683       | CakSNP12683    | <i>Kabuli</i>    | <i>Ca_Kabuli_Chr07</i>       | 20498552                       | (T/C)       |
| 12684       | CakSNP12684    | <i>Kabuli</i>    | <i>Ca_Kabuli_Chr07</i>       | 20498626                       | (T/G)       |
| 12685       | CakSNP12685    | <i>Kabuli</i>    | <i>Ca_Kabuli_Chr07</i>       | 20540780                       | (C/T)       |
| 12686       | CakSNP12686    | <i>Kabuli</i>    | <i>Ca_Kabuli_Chr07</i>       | 20540791                       | (G/A)       |
| 12687       | CakSNP12687    | <i>Kabuli</i>    | <i>Ca_Kabuli_Chr07</i>       | 20543119                       | (T/C)       |
| 12688       | CakSNP12688    | <i>Kabuli</i>    | <i>Ca_Kabuli_Chr07</i>       | 20550563                       | (G/A)       |
| 12689       | CakSNP12689    | <i>Kabuli</i>    | <i>Ca_Kabuli_Chr07</i>       | 20550575                       | (C/G)       |
| 12690       | CakSNP12690    | <i>Kabuli</i>    | <i>Ca_Kabuli_Chr07</i>       | 20552041                       | (G/A)       |
| 12691       | CakSNP12691    | <i>Kabuli</i>    | <i>Ca_Kabuli_Chr07</i>       | 20552053                       | (C/G)       |
| 12692       | CakSNP12692    | <i>Kabuli</i>    | <i>Ca_Kabuli_Chr07</i>       | 20556466                       | (G/C)       |
| 12693       | CakSNP12693    | <i>Kabuli</i>    | <i>Ca_Kabuli_Chr07</i>       | 20556576                       | (C/T)       |
| 12694       | CakSNP12694    | <i>Kabuli</i>    | <i>Ca_Kabuli_Chr07</i>       | 20563931                       | (G/A)       |
| 12695       | CakSNP12695    | <i>Kabuli</i>    | <i>Ca_Kabuli_Chr07</i>       | 20564024                       | (G/A)       |
| 12696       | CakSNP12696    | <i>Kabuli</i>    | <i>Ca_Kabuli_Chr07</i>       | 20564266                       | (G/A)       |
| 12697       | CakSNP12697    | <i>Kabuli</i>    | <i>Ca_Kabuli_Chr07</i>       | 20564269                       | (C/T)       |
| 12698       | CakSNP12698    | <i>Kabuli</i>    | <i>Ca_Kabuli_Chr07</i>       | 20564297                       | (A/G)       |
| 12699       | CakSNP12699    | <i>Kabuli</i>    | <i>Ca_Kabuli_Chr07</i>       | 20579963                       | (G/T)       |
| 12700       | CakSNP12700    | <i>Kabuli</i>    | <i>Ca_Kabuli_Chr07</i>       | 20579974                       | (A/T)       |
| 12701       | CakSNP12701    | <i>Kabuli</i>    | <i>Ca_Kabuli_Chr07</i>       | 20585997                       | (T/G)       |
| 12702       | CakSNP12702    | <i>Kabuli</i>    | <i>Ca_Kabuli_Chr07</i>       | 20605389                       | (G/A)       |
| 12703       | CakSNP12703    | <i>Kabuli</i>    | <i>Ca_Kabuli_Chr07</i>       | 20605384                       | (C/G)       |
| 12704       | CakSNP12704    | <i>Kabuli</i>    | <i>Ca_Kabuli_Chr07</i>       | 20605373                       | (C/A)       |
| 12705       | CakSNP12705    | <i>Kabuli</i>    | <i>Ca_Kabuli_Chr07</i>       | 20633040                       | (A/G)       |
| 12706       | CakSNP12706    | <i>Kabuli</i>    | <i>Ca_Kabuli_Chr07</i>       | 20637152                       | (G/A)       |
| 12707       | CakSNP12707    | <i>Kabuli</i>    | <i>Ca_Kabuli_Chr07</i>       | 20917747                       | (A/G)       |
| 12708       | CakSNP12708    | <i>Kabuli</i>    | <i>Ca_Kabuli_Chr07</i>       | 20917743                       | (T/G)       |
| 12709       | CakSNP12709    | <i>Kabuli</i>    | <i>Ca_Kabuli_Chr07</i>       | 20917740                       | (A/G)       |
| 12710       | CakSNP12710    | <i>Kabuli</i>    | <i>Ca_Kabuli_Chr07</i>       | 21073385                       | (A/C)       |
| 12711       | CakSNP12711    | <i>Kabuli</i>    | <i>Ca_Kabuli_Chr07</i>       | 21081969                       | (A/G)       |
| 12712       | CakSNP12712    | <i>Kabuli</i>    | <i>Ca_Kabuli_Chr07</i>       | 21099782                       | (G/T)       |

| <b>S.N.</b> | <b>SNP IDs</b> | <b>Cultivars</b> | <b>Chromosomes/scaffolds</b> | <b>Physical positions (bp)</b> | <b>SNPs</b> |
|-------------|----------------|------------------|------------------------------|--------------------------------|-------------|
| 12713       | CakSNP12713    | <i>Kabuli</i>    | <i>Ca_Kabuli_Chr07</i>       | 21402075                       | (A/G)       |
| 12714       | CakSNP12714    | <i>Kabuli</i>    | <i>Ca_Kabuli_Chr07</i>       | 21402117                       | (A/C)       |
| 12715       | CakSNP12715    | <i>Kabuli</i>    | <i>Ca_Kabuli_Chr07</i>       | 21595525                       | (C/T)       |
| 12716       | CakSNP12716    | <i>Kabuli</i>    | <i>Ca_Kabuli_Chr07</i>       | 21595527                       | (T/G)       |
| 12717       | CakSNP12717    | <i>Kabuli</i>    | <i>Ca_Kabuli_Chr07</i>       | 21616285                       | (A/G)       |
| 12718       | CakSNP12718    | <i>Kabuli</i>    | <i>Ca_Kabuli_Chr07</i>       | 21616287                       | (T/G)       |
| 12719       | CakSNP12719    | <i>Kabuli</i>    | <i>Ca_Kabuli_Chr07</i>       | 21616294                       | (T/G)       |
| 12720       | CakSNP12720    | <i>Kabuli</i>    | <i>Ca_Kabuli_Chr07</i>       | 21626752                       | (T/C)       |
| 12721       | CakSNP12721    | <i>Kabuli</i>    | <i>Ca_Kabuli_Chr07</i>       | 21633103                       | (C/G)       |
| 12722       | CakSNP12722    | <i>Kabuli</i>    | <i>Ca_Kabuli_Chr07</i>       | 21639234                       | (G/A)       |
| 12723       | CakSNP12723    | <i>Kabuli</i>    | <i>Ca_Kabuli_Chr07</i>       | 21639238                       | (G/A)       |
| 12724       | CakSNP12724    | <i>Kabuli</i>    | <i>Ca_Kabuli_Chr07</i>       | 21639244                       | (T/G)       |
| 12725       | CakSNP12725    | <i>Kabuli</i>    | <i>Ca_Kabuli_Chr07</i>       | 21639251                       | (T/G)       |
| 12726       | CakSNP12726    | <i>Kabuli</i>    | <i>Ca_Kabuli_Chr07</i>       | 21639254                       | (T/G)       |
| 12727       | CakSNP12727    | <i>Kabuli</i>    | <i>Ca_Kabuli_Chr07</i>       | 21639375                       | (T/G)       |
| 12728       | CakSNP12728    | <i>Kabuli</i>    | <i>Ca_Kabuli_Chr07</i>       | 21644279                       | (C/T)       |
| 12729       | CakSNP12729    | <i>Kabuli</i>    | <i>Ca_Kabuli_Chr07</i>       | 21644342                       | (G/A)       |
| 12730       | CakSNP12730    | <i>Kabuli</i>    | <i>Ca_Kabuli_Chr07</i>       | 21713147                       | (T/G)       |
| 12731       | CakSNP12731    | <i>Kabuli</i>    | <i>Ca_Kabuli_Chr07</i>       | 21744514                       | (T/C)       |
| 12732       | CakSNP12732    | <i>Kabuli</i>    | <i>Ca_Kabuli_Chr07</i>       | 21918052                       | (G/C)       |
| 12733       | CakSNP12733    | <i>Kabuli</i>    | <i>Ca_Kabuli_Chr07</i>       | 22707297                       | (T/C)       |
| 12734       | CakSNP12734    | <i>Kabuli</i>    | <i>Ca_Kabuli_Chr07</i>       | 22721356                       | (A/C)       |
| 12735       | CakSNP12735    | <i>Kabuli</i>    | <i>Ca_Kabuli_Chr07</i>       | 22738152                       | (C/G)       |
| 12736       | CakSNP12736    | <i>Kabuli</i>    | <i>Ca_Kabuli_Chr07</i>       | 22738307                       | (G/C)       |
| 12737       | CakSNP12737    | <i>Kabuli</i>    | <i>Ca_Kabuli_Chr07</i>       | 22738482                       | (A/G)       |
| 12738       | CakSNP12738    | <i>Kabuli</i>    | <i>Ca_Kabuli_Chr07</i>       | 22808696                       | (A/G)       |
| 12739       | CakSNP12739    | <i>Kabuli</i>    | <i>Ca_Kabuli_Chr07</i>       | 22808695                       | (C/T)       |
| 12740       | CakSNP12740    | <i>Kabuli</i>    | <i>Ca_Kabuli_Chr07</i>       | 22808687                       | (C/T)       |
| 12741       | CakSNP12741    | <i>Kabuli</i>    | <i>Ca_Kabuli_Chr07</i>       | 22808717                       | (C/T)       |
| 12742       | CakSNP12742    | <i>Kabuli</i>    | <i>Ca_Kabuli_Chr07</i>       | 22808679                       | (A/C)       |
| 12743       | CakSNP12743    | <i>Kabuli</i>    | <i>Ca_Kabuli_Chr07</i>       | 22839776                       | (G/A)       |
| 12744       | CakSNP12744    | <i>Kabuli</i>    | <i>Ca_Kabuli_Chr07</i>       | 22875652                       | (A/G)       |
| 12745       | CakSNP12745    | <i>Kabuli</i>    | <i>Ca_Kabuli_Chr07</i>       | 23087696                       | (T/C)       |
| 12746       | CakSNP12746    | <i>Kabuli</i>    | <i>Ca_Kabuli_Chr07</i>       | 23087732                       | (T/C)       |
| 12747       | CakSNP12747    | <i>Kabuli</i>    | <i>Ca_Kabuli_Chr07</i>       | 23439214                       | (A/G)       |
| 12748       | CakSNP12748    | <i>Kabuli</i>    | <i>Ca_Kabuli_Chr07</i>       | 23439225                       | (C/A)       |
| 12749       | CakSNP12749    | <i>Kabuli</i>    | <i>Ca_Kabuli_Chr07</i>       | 23574823                       | (C/T)       |
| 12750       | CakSNP12750    | <i>Kabuli</i>    | <i>Ca_Kabuli_Chr07</i>       | 23575629                       | (G/A)       |
| 12751       | CakSNP12751    | <i>Kabuli</i>    | <i>Ca_Kabuli_Chr07</i>       | 23616050                       | (A/G)       |



| <b>S.N.</b> | <b>SNP IDs</b> | <b>Cultivars</b> | <b>Chromosomes/scaffolds</b> | <b>Physical positions (bp)</b> | <b>SNPs</b> |
|-------------|----------------|------------------|------------------------------|--------------------------------|-------------|
| 12752       | CakSNP12752    | <i>Kabuli</i>    | <i>Ca_Kabuli_Chr07</i>       | 24021690                       | (T/A)       |
| 12753       | CakSNP12753    | <i>Kabuli</i>    | <i>Ca_Kabuli_Chr07</i>       | 24181321                       | (G/A)       |
| 12754       | CakSNP12754    | <i>Kabuli</i>    | <i>Ca_Kabuli_Chr07</i>       | 24190633                       | (G/A)       |
| 12755       | CakSNP12755    | <i>Kabuli</i>    | <i>Ca_Kabuli_Chr07</i>       | 24190636                       | (G/A)       |
| 12756       | CakSNP12756    | <i>Kabuli</i>    | <i>Ca_Kabuli_Chr07</i>       | 24190645                       | (A/T)       |
| 12757       | CakSNP12757    | <i>Kabuli</i>    | <i>Ca_Kabuli_Chr07</i>       | 24190650                       | (G/A)       |
| 12758       | CakSNP12758    | <i>Kabuli</i>    | <i>Ca_Kabuli_Chr07</i>       | 24190671                       | (C/T)       |
| 12759       | CakSNP12759    | <i>Kabuli</i>    | <i>Ca_Kabuli_Chr07</i>       | 24245096                       | (C/T)       |
| 12760       | CakSNP12760    | <i>Kabuli</i>    | <i>Ca_Kabuli_Chr07</i>       | 24415819                       | (T/A)       |
| 12761       | CakSNP12761    | <i>Kabuli</i>    | <i>Ca_Kabuli_Chr07</i>       | 25218407                       | (C/T)       |
| 12762       | CakSNP12762    | <i>Kabuli</i>    | <i>Ca_Kabuli_Chr07</i>       | 25362272                       | (T/C)       |
| 12763       | CakSNP12763    | <i>Kabuli</i>    | <i>Ca_Kabuli_Chr07</i>       | 25428518                       | (T/C)       |
| 12764       | CakSNP12764    | <i>Kabuli</i>    | <i>Ca_Kabuli_Chr07</i>       | 25428525                       | (C/G)       |
| 12765       | CakSNP12765    | <i>Kabuli</i>    | <i>Ca_Kabuli_Chr07</i>       | 25428548                       | (G/T)       |
| 12766       | CakSNP12766    | <i>Kabuli</i>    | <i>Ca_Kabuli_Chr07</i>       | 25428566                       | (T/C)       |
| 12767       | CakSNP12767    | <i>Kabuli</i>    | <i>Ca_Kabuli_Chr07</i>       | 25428660                       | (G/A)       |
| 12768       | CakSNP12768    | <i>Kabuli</i>    | <i>Ca_Kabuli_Chr07</i>       | 25569665                       | (T/G)       |
| 12769       | CakSNP12769    | <i>Kabuli</i>    | <i>Ca_Kabuli_Chr07</i>       | 25569657                       | (T/C)       |
| 12770       | CakSNP12770    | <i>Kabuli</i>    | <i>Ca_Kabuli_Chr07</i>       | 25740866                       | (G/T)       |
| 12771       | CakSNP12771    | <i>Kabuli</i>    | <i>Ca_Kabuli_Chr07</i>       | 26070513                       | (G/T)       |
| 12772       | CakSNP12772    | <i>Kabuli</i>    | <i>Ca_Kabuli_Chr07</i>       | 26070515                       | (A/G)       |
| 12773       | CakSNP12773    | <i>Kabuli</i>    | <i>Ca_Kabuli_Chr07</i>       | 26094578                       | (T/C)       |
| 12774       | CakSNP12774    | <i>Kabuli</i>    | <i>Ca_Kabuli_Chr07</i>       | 26094572                       | (C/T)       |
| 12775       | CakSNP12775    | <i>Kabuli</i>    | <i>Ca_Kabuli_Chr07</i>       | 26094562                       | (G/T)       |
| 12776       | CakSNP12776    | <i>Kabuli</i>    | <i>Ca_Kabuli_Chr07</i>       | 26094567                       | (G/A)       |
| 12777       | CakSNP12777    | <i>Kabuli</i>    | <i>Ca_Kabuli_Chr07</i>       | 26094609                       | (C/T)       |
| 12778       | CakSNP12778    | <i>Kabuli</i>    | <i>Ca_Kabuli_Chr07</i>       | 26137315                       | (T/C)       |
| 12779       | CakSNP12779    | <i>Kabuli</i>    | <i>Ca_Kabuli_Chr07</i>       | 26146779                       | (C/T)       |
| 12780       | CakSNP12780    | <i>Kabuli</i>    | <i>Ca_Kabuli_Chr07</i>       | 26226146                       | (G/C)       |
| 12781       | CakSNP12781    | <i>Kabuli</i>    | <i>Ca_Kabuli_Chr07</i>       | 26487440                       | (A/C)       |
| 12782       | CakSNP12782    | <i>Kabuli</i>    | <i>Ca_Kabuli_Chr07</i>       | 26692131                       | (T/G)       |
| 12783       | CakSNP12783    | <i>Kabuli</i>    | <i>Ca_Kabuli_Chr07</i>       | 26692130                       | (C/T)       |
| 12784       | CakSNP12784    | <i>Kabuli</i>    | <i>Ca_Kabuli_Chr07</i>       | 26692128                       | (A/C)       |
| 12785       | CakSNP12785    | <i>Kabuli</i>    | <i>Ca_Kabuli_Chr07</i>       | 26692194                       | (C/A)       |
| 12786       | CakSNP12786    | <i>Kabuli</i>    | <i>Ca_Kabuli_Chr07</i>       | 26692195                       | (G/T)       |
| 12787       | CakSNP12787    | <i>Kabuli</i>    | <i>Ca_Kabuli_Chr07</i>       | 26694365                       | (G/A)       |
| 12788       | CakSNP12788    | <i>Kabuli</i>    | <i>Ca_Kabuli_Chr07</i>       | 26694440                       | (C/A)       |
| 12789       | CakSNP12789    | <i>Kabuli</i>    | <i>Ca_Kabuli_Chr07</i>       | 26694441                       | (G/A)       |
| 12790       | CakSNP12790    | <i>Kabuli</i>    | <i>Ca_Kabuli_Chr07</i>       | 26897878                       | (A/G)       |

| <b>S.N.</b> | <b>SNP IDs</b> | <b>Cultivars</b> | <b>Chromosomes/scaffolds</b> | <b>Physical positions (bp)</b> | <b>SNPs</b> |
|-------------|----------------|------------------|------------------------------|--------------------------------|-------------|
| 12791       | CakSNP12791    | <i>Kabuli</i>    | <i>Ca_Kabuli_Chr07</i>       | 26897910                       | (A/G)       |
| 12792       | CakSNP12792    | <i>Kabuli</i>    | <i>Ca_Kabuli_Chr07</i>       | 26897920                       | (A/G)       |
| 12793       | CakSNP12793    | <i>Kabuli</i>    | <i>Ca_Kabuli_Chr07</i>       | 26897923                       | (G/A)       |
| 12794       | CakSNP12794    | <i>Kabuli</i>    | <i>Ca_Kabuli_Chr07</i>       | 26897929                       | (T/C)       |
| 12795       | CakSNP12795    | <i>Kabuli</i>    | <i>Ca_Kabuli_Chr07</i>       | 26897940                       | (A/G)       |
| 12796       | CakSNP12796    | <i>Kabuli</i>    | <i>Ca_Kabuli_Chr07</i>       | 26897948                       | (A/T)       |
| 12797       | CakSNP12797    | <i>Kabuli</i>    | <i>Ca_Kabuli_Chr07</i>       | 26940917                       | (G/A)       |
| 12798       | CakSNP12798    | <i>Kabuli</i>    | <i>Ca_Kabuli_Chr07</i>       | 26940967                       | (A/G)       |
| 12799       | CakSNP12799    | <i>Kabuli</i>    | <i>Ca_Kabuli_Chr07</i>       | 26940979                       | (A/G)       |
| 12800       | CakSNP12800    | <i>Kabuli</i>    | <i>Ca_Kabuli_Chr07</i>       | 26940985                       | (T/G)       |
| 12801       | CakSNP12801    | <i>Kabuli</i>    | <i>Ca_Kabuli_Chr07</i>       | 27050259                       | (C/G)       |
| 12802       | CakSNP12802    | <i>Kabuli</i>    | <i>Ca_Kabuli_Chr07</i>       | 27176481                       | (C/A)       |
| 12803       | CakSNP12803    | <i>Kabuli</i>    | <i>Ca_Kabuli_Chr07</i>       | 27210919                       | (C/T)       |
| 12804       | CakSNP12804    | <i>Kabuli</i>    | <i>Ca_Kabuli_Chr07</i>       | 27210881                       | (C/T)       |
| 12805       | CakSNP12805    | <i>Kabuli</i>    | <i>Ca_Kabuli_Chr07</i>       | 27210871                       | (C/A)       |
| 12806       | CakSNP12806    | <i>Kabuli</i>    | <i>Ca_Kabuli_Chr07</i>       | 27210865                       | (T/C)       |
| 12807       | CakSNP12807    | <i>Kabuli</i>    | <i>Ca_Kabuli_Chr07</i>       | 27210858                       | (C/T)       |
| 12808       | CakSNP12808    | <i>Kabuli</i>    | <i>Ca_Kabuli_Chr07</i>       | 27210853                       | (A/G)       |
| 12809       | CakSNP12809    | <i>Kabuli</i>    | <i>Ca_Kabuli_Chr07</i>       | 27210848                       | (A/T)       |
| 12810       | CakSNP12810    | <i>Kabuli</i>    | <i>Ca_Kabuli_Chr07</i>       | 27210951                       | (T/C)       |
| 12811       | CakSNP12811    | <i>Kabuli</i>    | <i>Ca_Kabuli_Chr07</i>       | 27210945                       | (C/T)       |
| 12812       | CakSNP12812    | <i>Kabuli</i>    | <i>Ca_Kabuli_Chr07</i>       | 27210988                       | (C/T)       |
| 12813       | CakSNP12813    | <i>Kabuli</i>    | <i>Ca_Kabuli_Chr07</i>       | 27210989                       | (C/T)       |
| 12814       | CakSNP12814    | <i>Kabuli</i>    | <i>Ca_Kabuli_Chr07</i>       | 27210992                       | (C/A)       |
| 12815       | CakSNP12815    | <i>Kabuli</i>    | <i>Ca_Kabuli_Chr07</i>       | 27211004                       | (T/C)       |
| 12816       | CakSNP12816    | <i>Kabuli</i>    | <i>Ca_Kabuli_Chr07</i>       | 27211036                       | (G/A)       |
| 12817       | CakSNP12817    | <i>Kabuli</i>    | <i>Ca_Kabuli_Chr07</i>       | 27211051                       | (C/A)       |
| 12818       | CakSNP12818    | <i>Kabuli</i>    | <i>Ca_Kabuli_Chr07</i>       | 27211084                       | (G/T)       |
| 12819       | CakSNP12819    | <i>Kabuli</i>    | <i>Ca_Kabuli_Chr07</i>       | 27211073                       | (C/T)       |
| 12820       | CakSNP12820    | <i>Kabuli</i>    | <i>Ca_Kabuli_Chr07</i>       | 27211060                       | (C/T)       |
| 12821       | CakSNP12821    | <i>Kabuli</i>    | <i>Ca_Kabuli_Chr07</i>       | 27633960                       | (C/A)       |
| 12822       | CakSNP12822    | <i>Kabuli</i>    | <i>Ca_Kabuli_Chr07</i>       | 27735234                       | (A/G)       |
| 12823       | CakSNP12823    | <i>Kabuli</i>    | <i>Ca_Kabuli_Chr07</i>       | 27899782                       | (T/C)       |
| 12824       | CakSNP12824    | <i>Kabuli</i>    | <i>Ca_Kabuli_Chr07</i>       | 27899743                       | (G/A)       |
| 12825       | CakSNP12825    | <i>Kabuli</i>    | <i>Ca_Kabuli_Chr07</i>       | 27971186                       | (T/G)       |
| 12826       | CakSNP12826    | <i>Kabuli</i>    | <i>Ca_Kabuli_Chr07</i>       | 28676139                       | (T/C)       |
| 12827       | CakSNP12827    | <i>Kabuli</i>    | <i>Ca_Kabuli_Chr07</i>       | 28931212                       | (A/C)       |
| 12828       | CakSNP12828    | <i>Kabuli</i>    | <i>Ca_Kabuli_Chr07</i>       | 28931223                       | (C/A)       |
| 12829       | CakSNP12829    | <i>Kabuli</i>    | <i>Ca_Kabuli_Chr07</i>       | 29150927                       | (A/C)       |

| <b>S.N.</b> | <b>SNP IDs</b> | <b>Cultivars</b> | <b>Chromosomes/scaffolds</b> | <b>Physical positions (bp)</b> | <b>SNPs</b> |
|-------------|----------------|------------------|------------------------------|--------------------------------|-------------|
| 12830       | CakSNP12830    | <i>Kabuli</i>    | <i>Ca_Kabuli_Chr07</i>       | 29153994                       | (T/C)       |
| 12831       | CakSNP12831    | <i>Kabuli</i>    | <i>Ca_Kabuli_Chr07</i>       | 29154220                       | (C/A)       |
| 12832       | CakSNP12832    | <i>Kabuli</i>    | <i>Ca_Kabuli_Chr07</i>       | 29157286                       | (A/G)       |
| 12833       | CakSNP12833    | <i>Kabuli</i>    | <i>Ca_Kabuli_Chr07</i>       | 29168982                       | (G/A)       |
| 12834       | CakSNP12834    | <i>Kabuli</i>    | <i>Ca_Kabuli_Chr07</i>       | 29168980                       | (C/T)       |
| 12835       | CakSNP12835    | <i>Kabuli</i>    | <i>Ca_Kabuli_Chr07</i>       | 29190659                       | (T/G)       |
| 12836       | CakSNP12836    | <i>Kabuli</i>    | <i>Ca_Kabuli_Chr07</i>       | 29225385                       | (T/G)       |
| 12837       | CakSNP12837    | <i>Kabuli</i>    | <i>Ca_Kabuli_Chr07</i>       | 29225351                       | (T/G)       |
| 12838       | CakSNP12838    | <i>Kabuli</i>    | <i>Ca_Kabuli_Chr07</i>       | 29225348                       | (G/C)       |
| 12839       | CakSNP12839    | <i>Kabuli</i>    | <i>Ca_Kabuli_Chr07</i>       | 29229965                       | (A/G)       |
| 12840       | CakSNP12840    | <i>Kabuli</i>    | <i>Ca_Kabuli_Chr07</i>       | 29313114                       | (G/T)       |
| 12841       | CakSNP12841    | <i>Kabuli</i>    | <i>Ca_Kabuli_Chr07</i>       | 29313080                       | (T/C)       |
| 12842       | CakSNP12842    | <i>Kabuli</i>    | <i>Ca_Kabuli_Chr07</i>       | 29313067                       | (G/T)       |
| 12843       | CakSNP12843    | <i>Kabuli</i>    | <i>Ca_Kabuli_Chr07</i>       | 29313059                       | (G/A)       |
| 12844       | CakSNP12844    | <i>Kabuli</i>    | <i>Ca_Kabuli_Chr07</i>       | 29313058                       | (T/C)       |
| 12845       | CakSNP12845    | <i>Kabuli</i>    | <i>Ca_Kabuli_Chr07</i>       | 29313051                       | (T/C)       |
| 12846       | CakSNP12846    | <i>Kabuli</i>    | <i>Ca_Kabuli_Chr07</i>       | 29313257                       | (G/A)       |
| 12847       | CakSNP12847    | <i>Kabuli</i>    | <i>Ca_Kabuli_Chr07</i>       | 29434818                       | (T/C)       |
| 12848       | CakSNP12848    | <i>Kabuli</i>    | <i>Ca_Kabuli_Chr07</i>       | 29482556                       | (G/A)       |
| 12849       | CakSNP12849    | <i>Kabuli</i>    | <i>Ca_Kabuli_Chr07</i>       | 29484304                       | (G/A)       |
| 12850       | CakSNP12850    | <i>Kabuli</i>    | <i>Ca_Kabuli_Chr07</i>       | 29607943                       | (C/T)       |
| 12851       | CakSNP12851    | <i>Kabuli</i>    | <i>Ca_Kabuli_Chr07</i>       | 29613699                       | (C/T)       |
| 12852       | CakSNP12852    | <i>Kabuli</i>    | <i>Ca_Kabuli_Chr07</i>       | 29625884                       | (T/C)       |
| 12853       | CakSNP12853    | <i>Kabuli</i>    | <i>Ca_Kabuli_Chr07</i>       | 29705531                       | (T/G)       |
| 12854       | CakSNP12854    | <i>Kabuli</i>    | <i>Ca_Kabuli_Chr07</i>       | 29705499                       | (T/C)       |
| 12855       | CakSNP12855    | <i>Kabuli</i>    | <i>Ca_Kabuli_Chr07</i>       | 29796564                       | (G/T)       |
| 12856       | CakSNP12856    | <i>Kabuli</i>    | <i>Ca_Kabuli_Chr07</i>       | 29801148                       | (A/G)       |
| 12857       | CakSNP12857    | <i>Kabuli</i>    | <i>Ca_Kabuli_Chr07</i>       | 29801154                       | (T/C)       |
| 12858       | CakSNP12858    | <i>Kabuli</i>    | <i>Ca_Kabuli_Chr07</i>       | 29837035                       | (G/A)       |
| 12859       | CakSNP12859    | <i>Kabuli</i>    | <i>Ca_Kabuli_Chr07</i>       | 29838073                       | (C/T)       |
| 12860       | CakSNP12860    | <i>Kabuli</i>    | <i>Ca_Kabuli_Chr07</i>       | 29848248                       | (T/C)       |
| 12861       | CakSNP12861    | <i>Kabuli</i>    | <i>Ca_Kabuli_Chr07</i>       | 29848433                       | (C/T)       |
| 12862       | CakSNP12862    | <i>Kabuli</i>    | <i>Ca_Kabuli_Chr07</i>       | 29849509                       | (C/T)       |
| 12863       | CakSNP12863    | <i>Kabuli</i>    | <i>Ca_Kabuli_Chr07</i>       | 29849544                       | (A/G)       |
| 12864       | CakSNP12864    | <i>Kabuli</i>    | <i>Ca_Kabuli_Chr07</i>       | 29884719                       | (G/T)       |
| 12865       | CakSNP12865    | <i>Kabuli</i>    | <i>Ca_Kabuli_Chr07</i>       | 29884718                       | (C/A)       |
| 12866       | CakSNP12866    | <i>Kabuli</i>    | <i>Ca_Kabuli_Chr07</i>       | 29925008                       | (G/A)       |
| 12867       | CakSNP12867    | <i>Kabuli</i>    | <i>Ca_Kabuli_Chr07</i>       | 30004767                       | (C/T)       |
| 12868       | CakSNP12868    | <i>Kabuli</i>    | <i>Ca_Kabuli_Chr07</i>       | 30004934                       | (A/C)       |

| <b>S.N.</b> | <b>SNP IDs</b> | <b>Cultivars</b> | <b>Chromosomes/scaffolds</b> | <b>Physical positions (bp)</b> | <b>SNPs</b> |
|-------------|----------------|------------------|------------------------------|--------------------------------|-------------|
| 12869       | CakSNP12869    | <i>Kabuli</i>    | <i>Ca_Kabuli_Chr07</i>       | 30026039                       | (T/G)       |
| 12870       | CakSNP12870    | <i>Kabuli</i>    | <i>Ca_Kabuli_Chr07</i>       | 30026017                       | (C/T)       |
| 12871       | CakSNP12871    | <i>Kabuli</i>    | <i>Ca_Kabuli_Chr07</i>       | 30029793                       | (A/C)       |
| 12872       | CakSNP12872    | <i>Kabuli</i>    | <i>Ca_Kabuli_Chr07</i>       | 30029820                       | (T/C)       |
| 12873       | CakSNP12873    | <i>Kabuli</i>    | <i>Ca_Kabuli_Chr07</i>       | 30060299                       | (C/A)       |
| 12874       | CakSNP12874    | <i>Kabuli</i>    | <i>Ca_Kabuli_Chr07</i>       | 30085847                       | (C/T)       |
| 12875       | CakSNP12875    | <i>Kabuli</i>    | <i>Ca_Kabuli_Chr07</i>       | 30085883                       | (T/G)       |
| 12876       | CakSNP12876    | <i>Kabuli</i>    | <i>Ca_Kabuli_Chr07</i>       | 30085906                       | (C/T)       |
| 12877       | CakSNP12877    | <i>Kabuli</i>    | <i>Ca_Kabuli_Chr07</i>       | 30085910                       | (T/A)       |
| 12878       | CakSNP12878    | <i>Kabuli</i>    | <i>Ca_Kabuli_Chr07</i>       | 30099003                       | (C/T)       |
| 12879       | CakSNP12879    | <i>Kabuli</i>    | <i>Ca_Kabuli_Chr07</i>       | 30107340                       | (A/G)       |
| 12880       | CakSNP12880    | <i>Kabuli</i>    | <i>Ca_Kabuli_Chr07</i>       | 30398855                       | (A/C)       |
| 12881       | CakSNP12881    | <i>Kabuli</i>    | <i>Ca_Kabuli_Chr07</i>       | 30403615                       | (A/G)       |
| 12882       | CakSNP12882    | <i>Kabuli</i>    | <i>Ca_Kabuli_Chr07</i>       | 30403618                       | (G/A)       |
| 12883       | CakSNP12883    | <i>Kabuli</i>    | <i>Ca_Kabuli_Chr07</i>       | 30403700                       | (C/T)       |
| 12884       | CakSNP12884    | <i>Kabuli</i>    | <i>Ca_Kabuli_Chr07</i>       | 30403692                       | (G/A)       |
| 12885       | CakSNP12885    | <i>Kabuli</i>    | <i>Ca_Kabuli_Chr07</i>       | 30403621                       | (G/T)       |
| 12886       | CakSNP12886    | <i>Kabuli</i>    | <i>Ca_Kabuli_Chr07</i>       | 30691324                       | (A/C)       |
| 12887       | CakSNP12887    | <i>Kabuli</i>    | <i>Ca_Kabuli_Chr07</i>       | 30691318                       | (A/C)       |
| 12888       | CakSNP12888    | <i>Kabuli</i>    | <i>Ca_Kabuli_Chr07</i>       | 30768315                       | (G/A)       |
| 12889       | CakSNP12889    | <i>Kabuli</i>    | <i>Ca_Kabuli_Chr07</i>       | 30850950                       | (A/C)       |
| 12890       | CakSNP12890    | <i>Kabuli</i>    | <i>Ca_Kabuli_Chr07</i>       | 31190059                       | (G/A)       |
| 12891       | CakSNP12891    | <i>Kabuli</i>    | <i>Ca_Kabuli_Chr07</i>       | 31193786                       | (T/G)       |
| 12892       | CakSNP12892    | <i>Kabuli</i>    | <i>Ca_Kabuli_Chr07</i>       | 31314421                       | (T/A)       |
| 12893       | CakSNP12893    | <i>Kabuli</i>    | <i>Ca_Kabuli_Chr07</i>       | 31324279                       | (A/G)       |
| 12894       | CakSNP12894    | <i>Kabuli</i>    | <i>Ca_Kabuli_Chr07</i>       | 31401807                       | (T/C)       |
| 12895       | CakSNP12895    | <i>Kabuli</i>    | <i>Ca_Kabuli_Chr07</i>       | 31442425                       | (A/C)       |
| 12896       | CakSNP12896    | <i>Kabuli</i>    | <i>Ca_Kabuli_Chr07</i>       | 31612697                       | (T/A)       |
| 12897       | CakSNP12897    | <i>Kabuli</i>    | <i>Ca_Kabuli_Chr07</i>       | 31639701                       | (C/T)       |
| 12898       | CakSNP12898    | <i>Kabuli</i>    | <i>Ca_Kabuli_Chr07</i>       | 31830238                       | (A/G)       |
| 12899       | CakSNP12899    | <i>Kabuli</i>    | <i>Ca_Kabuli_Chr07</i>       | 31851096                       | (T/A)       |
| 12900       | CakSNP12900    | <i>Kabuli</i>    | <i>Ca_Kabuli_Chr07</i>       | 31873079                       | (G/T)       |
| 12901       | CakSNP12901    | <i>Kabuli</i>    | <i>Ca_Kabuli_Chr07</i>       | 31996345                       | (A/C)       |
| 12902       | CakSNP12902    | <i>Kabuli</i>    | <i>Ca_Kabuli_Chr07</i>       | 32017294                       | (G/A)       |
| 12903       | CakSNP12903    | <i>Kabuli</i>    | <i>Ca_Kabuli_Chr07</i>       | 32017288                       | (G/T)       |
| 12904       | CakSNP12904    | <i>Kabuli</i>    | <i>Ca_Kabuli_Chr07</i>       | 32017286                       | (T/G)       |
| 12905       | CakSNP12905    | <i>Kabuli</i>    | <i>Ca_Kabuli_Chr07</i>       | 32017284                       | (C/T)       |
| 12906       | CakSNP12906    | <i>Kabuli</i>    | <i>Ca_Kabuli_Chr07</i>       | 32017253                       | (G/A)       |
| 12907       | CakSNP12907    | <i>Kabuli</i>    | <i>Ca_Kabuli_Chr07</i>       | 32017252                       | (G/A)       |

| <b>S.N.</b> | <b>SNP IDs</b> | <b>Cultivars</b> | <b>Chromosomes/scaffolds</b> | <b>Physical positions (bp)</b> | <b>SNPs</b> |
|-------------|----------------|------------------|------------------------------|--------------------------------|-------------|
| 12908       | CakSNP12908    | <i>Kabuli</i>    | <i>Ca_Kabuli_Chr07</i>       | 32017238                       | (C/T)       |
| 12909       | CakSNP12909    | <i>Kabuli</i>    | <i>Ca_Kabuli_Chr07</i>       | 32017228                       | (G/A)       |
| 12910       | CakSNP12910    | <i>Kabuli</i>    | <i>Ca_Kabuli_Chr07</i>       | 32017221                       | (C/T)       |
| 12911       | CakSNP12911    | <i>Kabuli</i>    | <i>Ca_Kabuli_Chr07</i>       | 32017211                       | (C/A)       |
| 12912       | CakSNP12912    | <i>Kabuli</i>    | <i>Ca_Kabuli_Chr07</i>       | 32127288                       | (T/A)       |
| 12913       | CakSNP12913    | <i>Kabuli</i>    | <i>Ca_Kabuli_Chr07</i>       | 32283585                       | (T/G)       |
| 12914       | CakSNP12914    | <i>Kabuli</i>    | <i>Ca_Kabuli_Chr07</i>       | 32309397                       | (A/T)       |
| 12915       | CakSNP12915    | <i>Kabuli</i>    | <i>Ca_Kabuli_Chr07</i>       | 32309411                       | (G/T)       |
| 12916       | CakSNP12916    | <i>Kabuli</i>    | <i>Ca_Kabuli_Chr07</i>       | 32309415                       | (C/T)       |
| 12917       | CakSNP12917    | <i>Kabuli</i>    | <i>Ca_Kabuli_Chr07</i>       | 32309429                       | (C/T)       |
| 12918       | CakSNP12918    | <i>Kabuli</i>    | <i>Ca_Kabuli_Chr07</i>       | 32309377                       | (C/T)       |
| 12919       | CakSNP12919    | <i>Kabuli</i>    | <i>Ca_Kabuli_Chr07</i>       | 32309376                       | (C/G)       |
| 12920       | CakSNP12920    | <i>Kabuli</i>    | <i>Ca_Kabuli_Chr07</i>       | 32399759                       | (C/T)       |
| 12921       | CakSNP12921    | <i>Kabuli</i>    | <i>Ca_Kabuli_Chr07</i>       | 32404932                       | (T/C)       |
| 12922       | CakSNP12922    | <i>Kabuli</i>    | <i>Ca_Kabuli_Chr07</i>       | 32451377                       | (A/C)       |
| 12923       | CakSNP12923    | <i>Kabuli</i>    | <i>Ca_Kabuli_Chr07</i>       | 32522201                       | (A/G)       |
| 12924       | CakSNP12924    | <i>Kabuli</i>    | <i>Ca_Kabuli_Chr07</i>       | 32522203                       | (A/G)       |
| 12925       | CakSNP12925    | <i>Kabuli</i>    | <i>Ca_Kabuli_Chr07</i>       | 32522207                       | (T/G)       |
| 12926       | CakSNP12926    | <i>Kabuli</i>    | <i>Ca_Kabuli_Chr07</i>       | 32522213                       | (A/G)       |
| 12927       | CakSNP12927    | <i>Kabuli</i>    | <i>Ca_Kabuli_Chr07</i>       | 32522230                       | (T/G)       |
| 12928       | CakSNP12928    | <i>Kabuli</i>    | <i>Ca_Kabuli_Chr07</i>       | 32557599                       | (G/A)       |
| 12929       | CakSNP12929    | <i>Kabuli</i>    | <i>Ca_Kabuli_Chr07</i>       | 32669570                       | (A/G)       |
| 12930       | CakSNP12930    | <i>Kabuli</i>    | <i>Ca_Kabuli_Chr07</i>       | 32754633                       | (T/G)       |
| 12931       | CakSNP12931    | <i>Kabuli</i>    | <i>Ca_Kabuli_Chr07</i>       | 32755647                       | (A/C)       |
| 12932       | CakSNP12932    | <i>Kabuli</i>    | <i>Ca_Kabuli_Chr07</i>       | 32755662                       | (G/T)       |
| 12933       | CakSNP12933    | <i>Kabuli</i>    | <i>Ca_Kabuli_Chr07</i>       | 32784903                       | (T/G)       |
| 12934       | CakSNP12934    | <i>Kabuli</i>    | <i>Ca_Kabuli_Chr07</i>       | 32799037                       | (A/G)       |
| 12935       | CakSNP12935    | <i>Kabuli</i>    | <i>Ca_Kabuli_Chr07</i>       | 32807457                       | (T/A)       |
| 12936       | CakSNP12936    | <i>Kabuli</i>    | <i>Ca_Kabuli_Chr07</i>       | 32807499                       | (A/G)       |
| 12937       | CakSNP12937    | <i>Kabuli</i>    | <i>Ca_Kabuli_Chr07</i>       | 32874847                       | (C/T)       |
| 12938       | CakSNP12938    | <i>Kabuli</i>    | <i>Ca_Kabuli_Chr07</i>       | 32874840                       | (C/T)       |
| 12939       | CakSNP12939    | <i>Kabuli</i>    | <i>Ca_Kabuli_Chr07</i>       | 32875799                       | (T/A)       |
| 12940       | CakSNP12940    | <i>Kabuli</i>    | <i>Ca_Kabuli_Chr07</i>       | 32942199                       | (A/G)       |
| 12941       | CakSNP12941    | <i>Kabuli</i>    | <i>Ca_Kabuli_Chr07</i>       | 32942951                       | (T/G)       |
| 12942       | CakSNP12942    | <i>Kabuli</i>    | <i>Ca_Kabuli_Chr07</i>       | 32989796                       | (T/A)       |
| 12943       | CakSNP12943    | <i>Kabuli</i>    | <i>Ca_Kabuli_Chr07</i>       | 32989838                       | (C/T)       |
| 12944       | CakSNP12944    | <i>Kabuli</i>    | <i>Ca_Kabuli_Chr07</i>       | 32989903                       | (A/G)       |
| 12945       | CakSNP12945    | <i>Kabuli</i>    | <i>Ca_Kabuli_Chr07</i>       | 32989902                       | (C/A)       |
| 12946       | CakSNP12946    | <i>Kabuli</i>    | <i>Ca_Kabuli_Chr07</i>       | 33065611                       | (G/T)       |

| <b>S.N.</b> | <b>SNP IDs</b> | <b>Cultivars</b> | <b>Chromosomes/scaffolds</b> | <b>Physical positions (bp)</b> | <b>SNPs</b> |
|-------------|----------------|------------------|------------------------------|--------------------------------|-------------|
| 12947       | CakSNP12947    | <i>Kabuli</i>    | <i>Ca_Kabuli_Chr07</i>       | 33121674                       | (G/C)       |
| 12948       | CakSNP12948    | <i>Kabuli</i>    | <i>Ca_Kabuli_Chr07</i>       | 33121640                       | (C/A)       |
| 12949       | CakSNP12949    | <i>Kabuli</i>    | <i>Ca_Kabuli_Chr07</i>       | 33122473                       | (A/C)       |
| 12950       | CakSNP12950    | <i>Kabuli</i>    | <i>Ca_Kabuli_Chr07</i>       | 33182932                       | (G/A)       |
| 12951       | CakSNP12951    | <i>Kabuli</i>    | <i>Ca_Kabuli_Chr07</i>       | 33267485                       | (T/C)       |
| 12952       | CakSNP12952    | <i>Kabuli</i>    | <i>Ca_Kabuli_Chr07</i>       | 33267496                       | (T/A)       |
| 12953       | CakSNP12953    | <i>Kabuli</i>    | <i>Ca_Kabuli_Chr07</i>       | 33335978                       | (C/A)       |
| 12954       | CakSNP12954    | <i>Kabuli</i>    | <i>Ca_Kabuli_Chr07</i>       | 33364329                       | (C/T)       |
| 12955       | CakSNP12955    | <i>Kabuli</i>    | <i>Ca_Kabuli_Chr07</i>       | 33364354                       | (G/A)       |
| 12956       | CakSNP12956    | <i>Kabuli</i>    | <i>Ca_Kabuli_Chr07</i>       | 33378427                       | (C/T)       |
| 12957       | CakSNP12957    | <i>Kabuli</i>    | <i>Ca_Kabuli_Chr07</i>       | 33411746                       | (C/A)       |
| 12958       | CakSNP12958    | <i>Kabuli</i>    | <i>Ca_Kabuli_Chr07</i>       | 33465828                       | (C/A)       |
| 12959       | CakSNP12959    | <i>Kabuli</i>    | <i>Ca_Kabuli_Chr07</i>       | 33465818                       | (G/A)       |
| 12960       | CakSNP12960    | <i>Kabuli</i>    | <i>Ca_Kabuli_Chr07</i>       | 33465805                       | (T/C)       |
| 12961       | CakSNP12961    | <i>Kabuli</i>    | <i>Ca_Kabuli_Chr07</i>       | 33465802                       | (C/A)       |
| 12962       | CakSNP12962    | <i>Kabuli</i>    | <i>Ca_Kabuli_Chr07</i>       | 33465800                       | (T/A)       |
| 12963       | CakSNP12963    | <i>Kabuli</i>    | <i>Ca_Kabuli_Chr07</i>       | 33465781                       | (G/T)       |
| 12964       | CakSNP12964    | <i>Kabuli</i>    | <i>Ca_Kabuli_Chr07</i>       | 33465855                       | (A/C)       |
| 12965       | CakSNP12965    | <i>Kabuli</i>    | <i>Ca_Kabuli_Chr07</i>       | 33480940                       | (C/T)       |
| 12966       | CakSNP12966    | <i>Kabuli</i>    | <i>Ca_Kabuli_Chr07</i>       | 33573605                       | (C/T)       |
| 12967       | CakSNP12967    | <i>Kabuli</i>    | <i>Ca_Kabuli_Chr07</i>       | 33573655                       | (A/C)       |
| 12968       | CakSNP12968    | <i>Kabuli</i>    | <i>Ca_Kabuli_Chr07</i>       | 33619268                       | (G/C)       |
| 12969       | CakSNP12969    | <i>Kabuli</i>    | <i>Ca_Kabuli_Chr07</i>       | 33641799                       | (G/T)       |
| 12970       | CakSNP12970    | <i>Kabuli</i>    | <i>Ca_Kabuli_Chr07</i>       | 33641882                       | (A/T)       |
| 12971       | CakSNP12971    | <i>Kabuli</i>    | <i>Ca_Kabuli_Chr07</i>       | 33674454                       | (T/C)       |
| 12972       | CakSNP12972    | <i>Kabuli</i>    | <i>Ca_Kabuli_Chr07</i>       | 33744521                       | (C/G)       |
| 12973       | CakSNP12973    | <i>Kabuli</i>    | <i>Ca_Kabuli_Chr07</i>       | 33753917                       | (G/A)       |
| 12974       | CakSNP12974    | <i>Kabuli</i>    | <i>Ca_Kabuli_Chr07</i>       | 33761944                       | (G/A)       |
| 12975       | CakSNP12975    | <i>Kabuli</i>    | <i>Ca_Kabuli_Chr07</i>       | 33762053                       | (T/G)       |
| 12976       | CakSNP12976    | <i>Kabuli</i>    | <i>Ca_Kabuli_Chr07</i>       | 33821658                       | (C/T)       |
| 12977       | CakSNP12977    | <i>Kabuli</i>    | <i>Ca_Kabuli_Chr07</i>       | 33865463                       | (T/C)       |
| 12978       | CakSNP12978    | <i>Kabuli</i>    | <i>Ca_Kabuli_Chr07</i>       | 33865475                       | (G/A)       |
| 12979       | CakSNP12979    | <i>Kabuli</i>    | <i>Ca_Kabuli_Chr07</i>       | 33867334                       | (C/T)       |
| 12980       | CakSNP12980    | <i>Kabuli</i>    | <i>Ca_Kabuli_Chr07</i>       | 33867491                       | (C/T)       |
| 12981       | CakSNP12981    | <i>Kabuli</i>    | <i>Ca_Kabuli_Chr07</i>       | 33867674                       | (C/T)       |
| 12982       | CakSNP12982    | <i>Kabuli</i>    | <i>Ca_Kabuli_Chr07</i>       | 33869367                       | (G/A)       |
| 12983       | CakSNP12983    | <i>Kabuli</i>    | <i>Ca_Kabuli_Chr07</i>       | 33879559                       | (C/G)       |
| 12984       | CakSNP12984    | <i>Kabuli</i>    | <i>Ca_Kabuli_Chr07</i>       | 33910324                       | (C/A)       |
| 12985       | CakSNP12985    | <i>Kabuli</i>    | <i>Ca_Kabuli_Chr07</i>       | 33910870                       | (C/A)       |

| <b>S.N.</b> | <b>SNP IDs</b> | <b>Cultivars</b> | <b>Chromosomes/scaffolds</b> | <b>Physical positions (bp)</b> | <b>SNPs</b> |
|-------------|----------------|------------------|------------------------------|--------------------------------|-------------|
| 12986       | CakSNP12986    | <i>Kabuli</i>    | <i>Ca_Kabuli_Chr07</i>       | 33912719                       | (T/G)       |
| 12987       | CakSNP12987    | <i>Kabuli</i>    | <i>Ca_Kabuli_Chr07</i>       | 33912766                       | (G/T)       |
| 12988       | CakSNP12988    | <i>Kabuli</i>    | <i>Ca_Kabuli_Chr07</i>       | 33912866                       | (T/C)       |
| 12989       | CakSNP12989    | <i>Kabuli</i>    | <i>Ca_Kabuli_Chr07</i>       | 33912899                       | (T/A)       |
| 12990       | CakSNP12990    | <i>Kabuli</i>    | <i>Ca_Kabuli_Chr07</i>       | 33912902                       | (A/T)       |
| 12991       | CakSNP12991    | <i>Kabuli</i>    | <i>Ca_Kabuli_Chr07</i>       | 33912913                       | (A/T)       |
| 12992       | CakSNP12992    | <i>Kabuli</i>    | <i>Ca_Kabuli_Chr07</i>       | 33912916                       | (G/T)       |
| 12993       | CakSNP12993    | <i>Kabuli</i>    | <i>Ca_Kabuli_Chr07</i>       | 33912921                       | (T/G)       |
| 12994       | CakSNP12994    | <i>Kabuli</i>    | <i>Ca_Kabuli_Chr07</i>       | 33912950                       | (C/T)       |
| 12995       | CakSNP12995    | <i>Kabuli</i>    | <i>Ca_Kabuli_Chr07</i>       | 33912966                       | (T/C)       |
| 12996       | CakSNP12996    | <i>Kabuli</i>    | <i>Ca_Kabuli_Chr07</i>       | 33913094                       | (A/G)       |
| 12997       | CakSNP12997    | <i>Kabuli</i>    | <i>Ca_Kabuli_Chr07</i>       | 33913047                       | (C/T)       |
| 12998       | CakSNP12998    | <i>Kabuli</i>    | <i>Ca_Kabuli_Chr07</i>       | 33913045                       | (G/T)       |
| 12999       | CakSNP12999    | <i>Kabuli</i>    | <i>Ca_Kabuli_Chr07</i>       | 34107603                       | (C/A)       |
| 13000       | CakSNP13000    | <i>Kabuli</i>    | <i>Ca_Kabuli_Chr07</i>       | 34152124                       | (G/C)       |
| 13001       | CakSNP13001    | <i>Kabuli</i>    | <i>Ca_Kabuli_Chr07</i>       | 34271486                       | (A/G)       |
| 13002       | CakSNP13002    | <i>Kabuli</i>    | <i>Ca_Kabuli_Chr07</i>       | 34277014                       | (G/T)       |
| 13003       | CakSNP13003    | <i>Kabuli</i>    | <i>Ca_Kabuli_Chr07</i>       | 34277010                       | (A/G)       |
| 13004       | CakSNP13004    | <i>Kabuli</i>    | <i>Ca_Kabuli_Chr07</i>       | 34279673                       | (G/A)       |
| 13005       | CakSNP13005    | <i>Kabuli</i>    | <i>Ca_Kabuli_Chr07</i>       | 34279725                       | (A/G)       |
| 13006       | CakSNP13006    | <i>Kabuli</i>    | <i>Ca_Kabuli_Chr07</i>       | 34279715                       | (A/C)       |
| 13007       | CakSNP13007    | <i>Kabuli</i>    | <i>Ca_Kabuli_Chr07</i>       | 34318860                       | (C/T)       |
| 13008       | CakSNP13008    | <i>Kabuli</i>    | <i>Ca_Kabuli_Chr07</i>       | 34318862                       | (A/G)       |
| 13009       | CakSNP13009    | <i>Kabuli</i>    | <i>Ca_Kabuli_Chr07</i>       | 34474614                       | (A/C)       |
| 13010       | CakSNP13010    | <i>Kabuli</i>    | <i>Ca_Kabuli_Chr07</i>       | 34801839                       | (A/T)       |
| 13011       | CakSNP13011    | <i>Kabuli</i>    | <i>Ca_Kabuli_Chr07</i>       | 34857693                       | (C/T)       |
| 13012       | CakSNP13012    | <i>Kabuli</i>    | <i>Ca_Kabuli_Chr07</i>       | 34947743                       | (A/C)       |
| 13013       | CakSNP13013    | <i>Kabuli</i>    | <i>Ca_Kabuli_Chr07</i>       | 35016516                       | (G/C)       |
| 13014       | CakSNP13014    | <i>Kabuli</i>    | <i>Ca_Kabuli_Chr07</i>       | 35072425                       | (A/T)       |
| 13015       | CakSNP13015    | <i>Kabuli</i>    | <i>Ca_Kabuli_Chr07</i>       | 35072407                       | (G/A)       |
| 13016       | CakSNP13016    | <i>Kabuli</i>    | <i>Ca_Kabuli_Chr07</i>       | 35072461                       | (A/T)       |
| 13017       | CakSNP13017    | <i>Kabuli</i>    | <i>Ca_Kabuli_Chr07</i>       | 35074345                       | (T/A)       |
| 13018       | CakSNP13018    | <i>Kabuli</i>    | <i>Ca_Kabuli_Chr07</i>       | 35074348                       | (T/C)       |
| 13019       | CakSNP13019    | <i>Kabuli</i>    | <i>Ca_Kabuli_Chr07</i>       | 35074362                       | (T/C)       |
| 13020       | CakSNP13020    | <i>Kabuli</i>    | <i>Ca_Kabuli_Chr07</i>       | 35112785                       | (T/C)       |
| 13021       | CakSNP13021    | <i>Kabuli</i>    | <i>Ca_Kabuli_Chr07</i>       | 35114049                       | (C/T)       |
| 13022       | CakSNP13022    | <i>Kabuli</i>    | <i>Ca_Kabuli_Chr07</i>       | 35134809                       | (A/C)       |
| 13023       | CakSNP13023    | <i>Kabuli</i>    | <i>Ca_Kabuli_Chr07</i>       | 35134863                       | (T/C)       |
| 13024       | CakSNP13024    | <i>Kabuli</i>    | <i>Ca_Kabuli_Chr07</i>       | 35181619                       | (T/G)       |

| <b>S.N.</b> | <b>SNP IDs</b> | <b>Cultivars</b> | <b>Chromosomes/scaffolds</b> | <b>Physical positions (bp)</b> | <b>SNPs</b> |
|-------------|----------------|------------------|------------------------------|--------------------------------|-------------|
| 13025       | CakSNP13025    | <i>Kabuli</i>    | <i>Ca_Kabuli_Chr07</i>       | 35181661                       | (T/C)       |
| 13026       | CakSNP13026    | <i>Kabuli</i>    | <i>Ca_Kabuli_Chr07</i>       | 35181660                       | (G/A)       |
| 13027       | CakSNP13027    | <i>Kabuli</i>    | <i>Ca_Kabuli_Chr07</i>       | 35181635                       | (G/C)       |
| 13028       | CakSNP13028    | <i>Kabuli</i>    | <i>Ca_Kabuli_Chr07</i>       | 35227794                       | (A/C)       |
| 13029       | CakSNP13029    | <i>Kabuli</i>    | <i>Ca_Kabuli_Chr07</i>       | 35258029                       | (T/G)       |
| 13030       | CakSNP13030    | <i>Kabuli</i>    | <i>Ca_Kabuli_Chr07</i>       | 35263711                       | (A/T)       |
| 13031       | CakSNP13031    | <i>Kabuli</i>    | <i>Ca_Kabuli_Chr07</i>       | 35263712                       | (G/T)       |
| 13032       | CakSNP13032    | <i>Kabuli</i>    | <i>Ca_Kabuli_Chr07</i>       | 35263736                       | (C/G)       |
| 13033       | CakSNP13033    | <i>Kabuli</i>    | <i>Ca_Kabuli_Chr07</i>       | 35263758                       | (A/G)       |
| 13034       | CakSNP13034    | <i>Kabuli</i>    | <i>Ca_Kabuli_Chr07</i>       | 35274368                       | (A/G)       |
| 13035       | CakSNP13035    | <i>Kabuli</i>    | <i>Ca_Kabuli_Chr07</i>       | 35274859                       | (T/G)       |
| 13036       | CakSNP13036    | <i>Kabuli</i>    | <i>Ca_Kabuli_Chr07</i>       | 35274858                       | (G/A)       |
| 13037       | CakSNP13037    | <i>Kabuli</i>    | <i>Ca_Kabuli_Chr07</i>       | 35274828                       | (A/G)       |
| 13038       | CakSNP13038    | <i>Kabuli</i>    | <i>Ca_Kabuli_Chr07</i>       | 35279675                       | (A/G)       |
| 13039       | CakSNP13039    | <i>Kabuli</i>    | <i>Ca_Kabuli_Chr07</i>       | 35280189                       | (G/A)       |
| 13040       | CakSNP13040    | <i>Kabuli</i>    | <i>Ca_Kabuli_Chr07</i>       | 35280167                       | (A/G)       |
| 13041       | CakSNP13041    | <i>Kabuli</i>    | <i>Ca_Kabuli_Chr07</i>       | 35576427                       | (C/A)       |
| 13042       | CakSNP13042    | <i>Kabuli</i>    | <i>Ca_Kabuli_Chr07</i>       | 35619530                       | (G/A)       |
| 13043       | CakSNP13043    | <i>Kabuli</i>    | <i>Ca_Kabuli_Chr07</i>       | 35619487                       | (G/A)       |
| 13044       | CakSNP13044    | <i>Kabuli</i>    | <i>Ca_Kabuli_Chr07</i>       | 35619518                       | (G/C)       |
| 13045       | CakSNP13045    | <i>Kabuli</i>    | <i>Ca_Kabuli_Chr07</i>       | 35622168                       | (A/G)       |
| 13046       | CakSNP13046    | <i>Kabuli</i>    | <i>Ca_Kabuli_Chr07</i>       | 35637056                       | (T/C)       |
| 13047       | CakSNP13047    | <i>Kabuli</i>    | <i>Ca_Kabuli_Chr07</i>       | 35680423                       | (A/C)       |
| 13048       | CakSNP13048    | <i>Kabuli</i>    | <i>Ca_Kabuli_Chr07</i>       | 35799096                       | (A/C)       |
| 13049       | CakSNP13049    | <i>Kabuli</i>    | <i>Ca_Kabuli_Chr07</i>       | 35799083                       | (T/A)       |
| 13050       | CakSNP13050    | <i>Kabuli</i>    | <i>Ca_Kabuli_Chr07</i>       | 35799074                       | (G/C)       |
| 13051       | CakSNP13051    | <i>Kabuli</i>    | <i>Ca_Kabuli_Chr07</i>       | 35799073                       | (T/C)       |
| 13052       | CakSNP13052    | <i>Kabuli</i>    | <i>Ca_Kabuli_Chr07</i>       | 35807000                       | (A/G)       |
| 13053       | CakSNP13053    | <i>Kabuli</i>    | <i>Ca_Kabuli_Chr07</i>       | 35806999                       | (C/G)       |
| 13054       | CakSNP13054    | <i>Kabuli</i>    | <i>Ca_Kabuli_Chr07</i>       | 35806990                       | (A/T)       |
| 13055       | CakSNP13055    | <i>Kabuli</i>    | <i>Ca_Kabuli_Chr07</i>       | 35806977                       | (T/G)       |
| 13056       | CakSNP13056    | <i>Kabuli</i>    | <i>Ca_Kabuli_Chr07</i>       | 35911620                       | (T/G)       |
| 13057       | CakSNP13057    | <i>Kabuli</i>    | <i>Ca_Kabuli_Chr07</i>       | 35911617                       | (A/C)       |
| 13058       | CakSNP13058    | <i>Kabuli</i>    | <i>Ca_Kabuli_Chr07</i>       | 35911615                       | (C/T)       |
| 13059       | CakSNP13059    | <i>Kabuli</i>    | <i>Ca_Kabuli_Chr07</i>       | 35911612                       | (T/G)       |
| 13060       | CakSNP13060    | <i>Kabuli</i>    | <i>Ca_Kabuli_Chr07</i>       | 35911606                       | (T/C)       |
| 13061       | CakSNP13061    | <i>Kabuli</i>    | <i>Ca_Kabuli_Chr07</i>       | 35947529                       | (T/C)       |
| 13062       | CakSNP13062    | <i>Kabuli</i>    | <i>Ca_Kabuli_Chr07</i>       | 35947550                       | (C/T)       |
| 13063       | CakSNP13063    | <i>Kabuli</i>    | <i>Ca_Kabuli_Chr07</i>       | 35947551                       | (A/G)       |



| <b>S.N.</b> | <b>SNP IDs</b> | <b>Cultivars</b> | <b>Chromosomes/scaffolds</b> | <b>Physical positions (bp)</b> | <b>SNPs</b> |
|-------------|----------------|------------------|------------------------------|--------------------------------|-------------|
| 13064       | CakSNP13064    | <i>Kabuli</i>    | <i>Ca_Kabuli_Chr07</i>       | 35959805                       | (C/T)       |
| 13065       | CakSNP13065    | <i>Kabuli</i>    | <i>Ca_Kabuli_Chr07</i>       | 35959825                       | (G/A)       |
| 13066       | CakSNP13066    | <i>Kabuli</i>    | <i>Ca_Kabuli_Chr07</i>       | 35959878                       | (G/A)       |
| 13067       | CakSNP13067    | <i>Kabuli</i>    | <i>Ca_Kabuli_Chr07</i>       | 35959917                       | (C/T)       |
| 13068       | CakSNP13068    | <i>Kabuli</i>    | <i>Ca_Kabuli_Chr07</i>       | 35959865                       | (T/C)       |
| 13069       | CakSNP13069    | <i>Kabuli</i>    | <i>Ca_Kabuli_Chr07</i>       | 36711954                       | (C/A)       |
| 13070       | CakSNP13070    | <i>Kabuli</i>    | <i>Ca_Kabuli_Chr07</i>       | 36715249                       | (T/C)       |
| 13071       | CakSNP13071    | <i>Kabuli</i>    | <i>Ca_Kabuli_Chr07</i>       | 36745439                       | (T/G)       |
| 13072       | CakSNP13072    | <i>Kabuli</i>    | <i>Ca_Kabuli_Chr07</i>       | 36916272                       | (T/G)       |
| 13073       | CakSNP13073    | <i>Kabuli</i>    | <i>Ca_Kabuli_Chr07</i>       | 36916273                       | (T/A)       |
| 13074       | CakSNP13074    | <i>Kabuli</i>    | <i>Ca_Kabuli_Chr07</i>       | 36998096                       | (T/C)       |
| 13075       | CakSNP13075    | <i>Kabuli</i>    | <i>Ca_Kabuli_Chr07</i>       | 36998113                       | (C/T)       |
| 13076       | CakSNP13076    | <i>Kabuli</i>    | <i>Ca_Kabuli_Chr07</i>       | 37058979                       | (C/T)       |
| 13077       | CakSNP13077    | <i>Kabuli</i>    | <i>Ca_Kabuli_Chr07</i>       | 37187439                       | (A/G)       |
| 13078       | CakSNP13078    | <i>Kabuli</i>    | <i>Ca_Kabuli_Chr07</i>       | 37626729                       | (G/T)       |
| 13079       | CakSNP13079    | <i>Kabuli</i>    | <i>Ca_Kabuli_Chr07</i>       | 37626653                       | (A/C)       |
| 13080       | CakSNP13080    | <i>Kabuli</i>    | <i>Ca_Kabuli_Chr07</i>       | 37626687                       | (A/G)       |
| 13081       | CakSNP13081    | <i>Kabuli</i>    | <i>Ca_Kabuli_Chr07</i>       | 37626666                       | (C/T)       |
| 13082       | CakSNP13082    | <i>Kabuli</i>    | <i>Ca_Kabuli_Chr07</i>       | 37703967                       | (G/A)       |
| 13083       | CakSNP13083    | <i>Kabuli</i>    | <i>Ca_Kabuli_Chr07</i>       | 37703966                       | (C/T)       |
| 13084       | CakSNP13084    | <i>Kabuli</i>    | <i>Ca_Kabuli_Chr07</i>       | 37703965                       | (C/T)       |
| 13085       | CakSNP13085    | <i>Kabuli</i>    | <i>Ca_Kabuli_Chr07</i>       | 37703921                       | (G/T)       |
| 13086       | CakSNP13086    | <i>Kabuli</i>    | <i>Ca_Kabuli_Chr07</i>       | 37703912                       | (G/A)       |
| 13087       | CakSNP13087    | <i>Kabuli</i>    | <i>Ca_Kabuli_Chr07</i>       | 37703913                       | (C/G)       |
| 13088       | CakSNP13088    | <i>Kabuli</i>    | <i>Ca_Kabuli_Chr07</i>       | 37703936                       | (C/T)       |
| 13089       | CakSNP13089    | <i>Kabuli</i>    | <i>Ca_Kabuli_Chr07</i>       | 37857936                       | (G/T)       |
| 13090       | CakSNP13090    | <i>Kabuli</i>    | <i>Ca_Kabuli_Chr07</i>       | 37857928                       | (A/T)       |
| 13091       | CakSNP13091    | <i>Kabuli</i>    | <i>Ca_Kabuli_Chr07</i>       | 37857917                       | (G/A)       |
| 13092       | CakSNP13092    | <i>Kabuli</i>    | <i>Ca_Kabuli_Chr07</i>       | 37857885                       | (C/T)       |
| 13093       | CakSNP13093    | <i>Kabuli</i>    | <i>Ca_Kabuli_Chr07</i>       | 38047374                       | (A/G)       |
| 13094       | CakSNP13094    | <i>Kabuli</i>    | <i>Ca_Kabuli_Chr07</i>       | 38047378                       | (C/A)       |
| 13095       | CakSNP13095    | <i>Kabuli</i>    | <i>Ca_Kabuli_Chr07</i>       | 38143361                       | (A/G)       |
| 13096       | CakSNP13096    | <i>Kabuli</i>    | <i>Ca_Kabuli_Chr07</i>       | 38143524                       | (T/A)       |
| 13097       | CakSNP13097    | <i>Kabuli</i>    | <i>Ca_Kabuli_Chr07</i>       | 38143452                       | (G/A)       |
| 13098       | CakSNP13098    | <i>Kabuli</i>    | <i>Ca_Kabuli_Chr07</i>       | 38460464                       | (G/A)       |
| 13099       | CakSNP13099    | <i>Kabuli</i>    | <i>Ca_Kabuli_Chr07</i>       | 38460452                       | (C/T)       |
| 13100       | CakSNP13100    | <i>Kabuli</i>    | <i>Ca_Kabuli_Chr07</i>       | 38460425                       | (G/A)       |
| 13101       | CakSNP13101    | <i>Kabuli</i>    | <i>Ca_Kabuli_Chr07</i>       | 38460394                       | (C/A)       |
| 13102       | CakSNP13102    | <i>Kabuli</i>    | <i>Ca_Kabuli_Chr07</i>       | 39181880                       | (G/A)       |

| <b>S.N.</b> | <b>SNP IDs</b> | <b>Cultivars</b> | <b>Chromosomes/scaffolds</b> | <b>Physical positions (bp)</b> | <b>SNPs</b> |
|-------------|----------------|------------------|------------------------------|--------------------------------|-------------|
| 13103       | CakSNP13103    | <i>Kabuli</i>    | <i>Ca_Kabuli_Chr07</i>       | 39182564                       | (A/T)       |
| 13104       | CakSNP13104    | <i>Kabuli</i>    | <i>Ca_Kabuli_Chr07</i>       | 39339510                       | (T/G)       |
| 13105       | CakSNP13105    | <i>Kabuli</i>    | <i>Ca_Kabuli_Chr07</i>       | 39339509                       | (G/A)       |
| 13106       | CakSNP13106    | <i>Kabuli</i>    | <i>Ca_Kabuli_Chr07</i>       | 39339508                       | (G/A)       |
| 13107       | CakSNP13107    | <i>Kabuli</i>    | <i>Ca_Kabuli_Chr07</i>       | 39339503                       | (C/A)       |
| 13108       | CakSNP13108    | <i>Kabuli</i>    | <i>Ca_Kabuli_Chr07</i>       | 39339502                       | (C/A)       |
| 13109       | CakSNP13109    | <i>Kabuli</i>    | <i>Ca_Kabuli_Chr07</i>       | 39339501                       | (G/C)       |
| 13110       | CakSNP13110    | <i>Kabuli</i>    | <i>Ca_Kabuli_Chr07</i>       | 39339500                       | (G/T)       |
| 13111       | CakSNP13111    | <i>Kabuli</i>    | <i>Ca_Kabuli_Chr07</i>       | 39339499                       | (C/T)       |
| 13112       | CakSNP13112    | <i>Kabuli</i>    | <i>Ca_Kabuli_Chr07</i>       | 39339498                       | (G/T)       |
| 13113       | CakSNP13113    | <i>Kabuli</i>    | <i>Ca_Kabuli_Chr07</i>       | 39339495                       | (G/T)       |
| 13114       | CakSNP13114    | <i>Kabuli</i>    | <i>Ca_Kabuli_Chr07</i>       | 39399280                       | (T/C)       |
| 13115       | CakSNP13115    | <i>Kabuli</i>    | <i>Ca_Kabuli_Chr07</i>       | 39680221                       | (A/C)       |
| 13116       | CakSNP13116    | <i>Kabuli</i>    | <i>Ca_Kabuli_Chr07</i>       | 39680222                       | (G/A)       |
| 13117       | CakSNP13117    | <i>Kabuli</i>    | <i>Ca_Kabuli_Chr07</i>       | 39768248                       | (T/C)       |
| 13118       | CakSNP13118    | <i>Kabuli</i>    | <i>Ca_Kabuli_Chr07</i>       | 39944444                       | (T/C)       |
| 13119       | CakSNP13119    | <i>Kabuli</i>    | <i>Ca_Kabuli_Chr07</i>       | 39944937                       | (T/C)       |
| 13120       | CakSNP13120    | <i>Kabuli</i>    | <i>Ca_Kabuli_Chr07</i>       | 39944889                       | (T/C)       |
| 13121       | CakSNP13121    | <i>Kabuli</i>    | <i>Ca_Kabuli_Chr07</i>       | 40092198                       | (G/A)       |
| 13122       | CakSNP13122    | <i>Kabuli</i>    | <i>Ca_Kabuli_Chr07</i>       | 40092181                       | (C/T)       |
| 13123       | CakSNP13123    | <i>Kabuli</i>    | <i>Ca_Kabuli_Chr07</i>       | 40092218                       | (A/T)       |
| 13124       | CakSNP13124    | <i>Kabuli</i>    | <i>Ca_Kabuli_Chr07</i>       | 40092213                       | (G/A)       |
| 13125       | CakSNP13125    | <i>Kabuli</i>    | <i>Ca_Kabuli_Chr07</i>       | 40092163                       | (T/C)       |
| 13126       | CakSNP13126    | <i>Kabuli</i>    | <i>Ca_Kabuli_Chr07</i>       | 40092155                       | (T/A)       |
| 13127       | CakSNP13127    | <i>Kabuli</i>    | <i>Ca_Kabuli_Chr07</i>       | 40092156                       | (C/A)       |
| 13128       | CakSNP13128    | <i>Kabuli</i>    | <i>Ca_Kabuli_Chr07</i>       | 40092168                       | (G/A)       |
| 13129       | CakSNP13129    | <i>Kabuli</i>    | <i>Ca_Kabuli_Chr07</i>       | 40092201                       | (G/A)       |
| 13130       | CakSNP13130    | <i>Kabuli</i>    | <i>Ca_Kabuli_Chr07</i>       | 40092203                       | (T/G)       |
| 13131       | CakSNP13131    | <i>Kabuli</i>    | <i>Ca_Kabuli_Chr07</i>       | 40092211                       | (C/T)       |
| 13132       | CakSNP13132    | <i>Kabuli</i>    | <i>Ca_Kabuli_Chr07</i>       | 40092214                       | (C/G)       |
| 13133       | CakSNP13133    | <i>Kabuli</i>    | <i>Ca_Kabuli_Chr07</i>       | 40092229                       | (C/A)       |
| 13134       | CakSNP13134    | <i>Kabuli</i>    | <i>Ca_Kabuli_Chr07</i>       | 40092237                       | (C/T)       |
| 13135       | CakSNP13135    | <i>Kabuli</i>    | <i>Ca_Kabuli_Chr07</i>       | 40092239                       | (G/A)       |
| 13136       | CakSNP13136    | <i>Kabuli</i>    | <i>Ca_Kabuli_Chr07</i>       | 40092250                       | (A/C)       |
| 13137       | CakSNP13137    | <i>Kabuli</i>    | <i>Ca_Kabuli_Chr07</i>       | 40092253                       | (C/T)       |
| 13138       | CakSNP13138    | <i>Kabuli</i>    | <i>Ca_Kabuli_Chr07</i>       | 40092256                       | (T/C)       |
| 13139       | CakSNP13139    | <i>Kabuli</i>    | <i>Ca_Kabuli_Chr07</i>       | 40092267                       | (G/C)       |
| 13140       | CakSNP13140    | <i>Kabuli</i>    | <i>Ca_Kabuli_Chr07</i>       | 40183449                       | (C/A)       |
| 13141       | CakSNP13141    | <i>Kabuli</i>    | <i>Ca_Kabuli_Chr07</i>       | 40183452                       | (A/C)       |

| <b>S.N.</b> | <b>SNP IDs</b> | <b>Cultivars</b> | <b>Chromosomes/scaffolds</b> | <b>Physical positions (bp)</b> | <b>SNPs</b> |
|-------------|----------------|------------------|------------------------------|--------------------------------|-------------|
| 13142       | CakSNP13142    | <i>Kabuli</i>    | <i>Ca_Kabuli_Chr07</i>       | 40241674                       | (A/C)       |
| 13143       | CakSNP13143    | <i>Kabuli</i>    | <i>Ca_Kabuli_Chr07</i>       | 40242539                       | (A/G)       |
| 13144       | CakSNP13144    | <i>Kabuli</i>    | <i>Ca_Kabuli_Chr07</i>       | 40242765                       | (A/G)       |
| 13145       | CakSNP13145    | <i>Kabuli</i>    | <i>Ca_Kabuli_Chr07</i>       | 40243784                       | (G/A)       |
| 13146       | CakSNP13146    | <i>Kabuli</i>    | <i>Ca_Kabuli_Chr07</i>       | 40323213                       | (C/A)       |
| 13147       | CakSNP13147    | <i>Kabuli</i>    | <i>Ca_Kabuli_Chr07</i>       | 40323251                       | (T/A)       |
| 13148       | CakSNP13148    | <i>Kabuli</i>    | <i>Ca_Kabuli_Chr07</i>       | 40429548                       | (A/G)       |
| 13149       | CakSNP13149    | <i>Kabuli</i>    | <i>Ca_Kabuli_Chr07</i>       | 40429552                       | (C/T)       |
| 13150       | CakSNP13150    | <i>Kabuli</i>    | <i>Ca_Kabuli_Chr07</i>       | 40429564                       | (G/T)       |
| 13151       | CakSNP13151    | <i>Kabuli</i>    | <i>Ca_Kabuli_Chr07</i>       | 40429573                       | (G/T)       |
| 13152       | CakSNP13152    | <i>Kabuli</i>    | <i>Ca_Kabuli_Chr07</i>       | 40429629                       | (G/T)       |
| 13153       | CakSNP13153    | <i>Kabuli</i>    | <i>Ca_Kabuli_Chr07</i>       | 40429621                       | (G/T)       |
| 13154       | CakSNP13154    | <i>Kabuli</i>    | <i>Ca_Kabuli_Chr07</i>       | 40429604                       | (C/T)       |
| 13155       | CakSNP13155    | <i>Kabuli</i>    | <i>Ca_Kabuli_Chr07</i>       | 40429600                       | (C/T)       |
| 13156       | CakSNP13156    | <i>Kabuli</i>    | <i>Ca_Kabuli_Chr07</i>       | 40429596                       | (G/A)       |
| 13157       | CakSNP13157    | <i>Kabuli</i>    | <i>Ca_Kabuli_Chr07</i>       | 40429567                       | (G/A)       |
| 13158       | CakSNP13158    | <i>Kabuli</i>    | <i>Ca_Kabuli_Chr07</i>       | 40456574                       | (T/C)       |
| 13159       | CakSNP13159    | <i>Kabuli</i>    | <i>Ca_Kabuli_Chr07</i>       | 40645278                       | (A/G)       |
| 13160       | CakSNP13160    | <i>Kabuli</i>    | <i>Ca_Kabuli_Chr07</i>       | 40645276                       | (A/G)       |
| 13161       | CakSNP13161    | <i>Kabuli</i>    | <i>Ca_Kabuli_Chr07</i>       | 40645208                       | (C/G)       |
| 13162       | CakSNP13162    | <i>Kabuli</i>    | <i>Ca_Kabuli_Chr07</i>       | 40889596                       | (A/C)       |
| 13163       | CakSNP13163    | <i>Kabuli</i>    | <i>Ca_Kabuli_Chr07</i>       | 40889598                       | (C/G)       |
| 13164       | CakSNP13164    | <i>Kabuli</i>    | <i>Ca_Kabuli_Chr07</i>       | 40889623                       | (G/A)       |
| 13165       | CakSNP13165    | <i>Kabuli</i>    | <i>Ca_Kabuli_Chr07</i>       | 40889632                       | (C/T)       |
| 13166       | CakSNP13166    | <i>Kabuli</i>    | <i>Ca_Kabuli_Chr07</i>       | 40889633                       | (G/A)       |
| 13167       | CakSNP13167    | <i>Kabuli</i>    | <i>Ca_Kabuli_Chr07</i>       | 40889640                       | (G/A)       |
| 13168       | CakSNP13168    | <i>Kabuli</i>    | <i>Ca_Kabuli_Chr07</i>       | 40889641                       | (C/T)       |
| 13169       | CakSNP13169    | <i>Kabuli</i>    | <i>Ca_Kabuli_Chr07</i>       | 40889643                       | (G/A)       |
| 13170       | CakSNP13170    | <i>Kabuli</i>    | <i>Ca_Kabuli_Chr07</i>       | 40889648                       | (T/A)       |
| 13171       | CakSNP13171    | <i>Kabuli</i>    | <i>Ca_Kabuli_Chr07</i>       | 40889649                       | (G/A)       |
| 13172       | CakSNP13172    | <i>Kabuli</i>    | <i>Ca_Kabuli_Chr07</i>       | 40889673                       | (C/A)       |
| 13173       | CakSNP13173    | <i>Kabuli</i>    | <i>Ca_Kabuli_Chr07</i>       | 40889670                       | (C/T)       |
| 13174       | CakSNP13174    | <i>Kabuli</i>    | <i>Ca_Kabuli_Chr07</i>       | 40889723                       | (C/G)       |
| 13175       | CakSNP13175    | <i>Kabuli</i>    | <i>Ca_Kabuli_Chr07</i>       | 40889684                       | (C/T)       |
| 13176       | CakSNP13176    | <i>Kabuli</i>    | <i>Ca_Kabuli_Chr07</i>       | 41282883                       | (A/T)       |
| 13177       | CakSNP13177    | <i>Kabuli</i>    | <i>Ca_Kabuli_Chr07</i>       | 41282961                       | (G/T)       |
| 13178       | CakSNP13178    | <i>Kabuli</i>    | <i>Ca_Kabuli_Chr07</i>       | 41282960                       | (A/C)       |
| 13179       | CakSNP13179    | <i>Kabuli</i>    | <i>Ca_Kabuli_Chr07</i>       | 41282957                       | (G/A)       |
| 13180       | CakSNP13180    | <i>Kabuli</i>    | <i>Ca_Kabuli_Chr07</i>       | 41325886                       | (A/G)       |

| <b>S.N.</b> | <b>SNP IDs</b> | <b>Cultivars</b> | <b>Chromosomes/scaffolds</b> | <b>Physical positions (bp)</b> | <b>SNPs</b> |
|-------------|----------------|------------------|------------------------------|--------------------------------|-------------|
| 13181       | CakSNP13181    | <i>Kabuli</i>    | <i>Ca_Kabuli_Chr07</i>       | 41339748                       | (C/A)       |
| 13182       | CakSNP13182    | <i>Kabuli</i>    | <i>Ca_Kabuli_Chr07</i>       | 41349604                       | (T/C)       |
| 13183       | CakSNP13183    | <i>Kabuli</i>    | <i>Ca_Kabuli_Chr07</i>       | 41387509                       | (A/C)       |
| 13184       | CakSNP13184    | <i>Kabuli</i>    | <i>Ca_Kabuli_Chr07</i>       | 41387502                       | (A/C)       |
| 13185       | CakSNP13185    | <i>Kabuli</i>    | <i>Ca_Kabuli_Chr07</i>       | 41387475                       | (A/C)       |
| 13186       | CakSNP13186    | <i>Kabuli</i>    | <i>Ca_Kabuli_Chr07</i>       | 41657180                       | (G/T)       |
| 13187       | CakSNP13187    | <i>Kabuli</i>    | <i>Ca_Kabuli_Chr07</i>       | 41657241                       | (T/C)       |
| 13188       | CakSNP13188    | <i>Kabuli</i>    | <i>Ca_Kabuli_Chr07</i>       | 41821410                       | (T/C)       |
| 13189       | CakSNP13189    | <i>Kabuli</i>    | <i>Ca_Kabuli_Chr07</i>       | 42166004                       | (C/T)       |
| 13190       | CakSNP13190    | <i>Kabuli</i>    | <i>Ca_Kabuli_Chr07</i>       | 42268628                       | (A/C)       |
| 13191       | CakSNP13191    | <i>Kabuli</i>    | <i>Ca_Kabuli_Chr07</i>       | 42272939                       | (G/C)       |
| 13192       | CakSNP13192    | <i>Kabuli</i>    | <i>Ca_Kabuli_Chr07</i>       | 42355002                       | (T/G)       |
| 13193       | CakSNP13193    | <i>Kabuli</i>    | <i>Ca_Kabuli_Chr07</i>       | 42354958                       | (G/A)       |
| 13194       | CakSNP13194    | <i>Kabuli</i>    | <i>Ca_Kabuli_Chr07</i>       | 42354938                       | (C/T)       |
| 13195       | CakSNP13195    | <i>Kabuli</i>    | <i>Ca_Kabuli_Chr07</i>       | 42354999                       | (C/T)       |
| 13196       | CakSNP13196    | <i>Kabuli</i>    | <i>Ca_Kabuli_Chr07</i>       | 42355011                       | (G/T)       |
| 13197       | CakSNP13197    | <i>Kabuli</i>    | <i>Ca_Kabuli_Chr07</i>       | 42566717                       | (A/G)       |
| 13198       | CakSNP13198    | <i>Kabuli</i>    | <i>Ca_Kabuli_Chr07</i>       | 42846882                       | (C/T)       |
| 13199       | CakSNP13199    | <i>Kabuli</i>    | <i>Ca_Kabuli_Chr07</i>       | 42851182                       | (T/C)       |
| 13200       | CakSNP13200    | <i>Kabuli</i>    | <i>Ca_Kabuli_Chr07</i>       | 43080817                       | (T/C)       |
| 13201       | CakSNP13201    | <i>Kabuli</i>    | <i>Ca_Kabuli_Chr07</i>       | 43118954                       | (A/C)       |
| 13202       | CakSNP13202    | <i>Kabuli</i>    | <i>Ca_Kabuli_Chr07</i>       | 43119266                       | (C/T)       |
| 13203       | CakSNP13203    | <i>Kabuli</i>    | <i>Ca_Kabuli_Chr07</i>       | 43210821                       | (A/T)       |
| 13204       | CakSNP13204    | <i>Kabuli</i>    | <i>Ca_Kabuli_Chr07</i>       | 43646117                       | (G/A)       |
| 13205       | CakSNP13205    | <i>Kabuli</i>    | <i>Ca_Kabuli_Chr07</i>       | 44232239                       | (G/A)       |
| 13206       | CakSNP13206    | <i>Kabuli</i>    | <i>Ca_Kabuli_Chr07</i>       | 44232204                       | (T/A)       |
| 13207       | CakSNP13207    | <i>Kabuli</i>    | <i>Ca_Kabuli_Chr07</i>       | 44232221                       | (C/T)       |
| 13208       | CakSNP13208    | <i>Kabuli</i>    | <i>Ca_Kabuli_Chr07</i>       | 44232266                       | (C/T)       |
| 13209       | CakSNP13209    | <i>Kabuli</i>    | <i>Ca_Kabuli_Chr07</i>       | 44540553                       | (T/G)       |
| 13210       | CakSNP13210    | <i>Kabuli</i>    | <i>Ca_Kabuli_Chr07</i>       | 44540595                       | (G/A)       |
| 13211       | CakSNP13211    | <i>Kabuli</i>    | <i>Ca_Kabuli_Chr07</i>       | 44540596                       | (C/A)       |
| 13212       | CakSNP13212    | <i>Kabuli</i>    | <i>Ca_Kabuli_Chr07</i>       | 44540629                       | (G/A)       |
| 13213       | CakSNP13213    | <i>Kabuli</i>    | <i>Ca_Kabuli_Chr07</i>       | 44540616                       | (C/A)       |
| 13214       | CakSNP13214    | <i>Kabuli</i>    | <i>Ca_Kabuli_Chr07</i>       | 44612651                       | (C/A)       |
| 13215       | CakSNP13215    | <i>Kabuli</i>    | <i>Ca_Kabuli_Chr07</i>       | 44747668                       | (C/T)       |
| 13216       | CakSNP13216    | <i>Kabuli</i>    | <i>Ca_Kabuli_Chr07</i>       | 44765450                       | (C/T)       |
| 13217       | CakSNP13217    | <i>Kabuli</i>    | <i>Ca_Kabuli_Chr07</i>       | 44765467                       | (G/T)       |
| 13218       | CakSNP13218    | <i>Kabuli</i>    | <i>Ca_Kabuli_Chr07</i>       | 44765522                       | (A/C)       |
| 13219       | CakSNP13219    | <i>Kabuli</i>    | <i>Ca_Kabuli_Chr07</i>       | 44877324                       | (A/C)       |

| <b>S.N.</b> | <b>SNP IDs</b> | <b>Cultivars</b> | <b>Chromosomes/scaffolds</b> | <b>Physical positions (bp)</b> | <b>SNPs</b> |
|-------------|----------------|------------------|------------------------------|--------------------------------|-------------|
| 13220       | CakSNP13220    | <i>Kabuli</i>    | <i>Ca_Kabuli_Chr07</i>       | 44926768                       | (C/T)       |
| 13221       | CakSNP13221    | <i>Kabuli</i>    | <i>Ca_Kabuli_Chr07</i>       | 44926783                       | (C/A)       |
| 13222       | CakSNP13222    | <i>Kabuli</i>    | <i>Ca_Kabuli_Chr07</i>       | 44926815                       | (C/T)       |
| 13223       | CakSNP13223    | <i>Kabuli</i>    | <i>Ca_Kabuli_Chr07</i>       | 45147550                       | (A/G)       |
| 13224       | CakSNP13224    | <i>Kabuli</i>    | <i>Ca_Kabuli_Chr07</i>       | 45280659                       | (T/A)       |
| 13225       | CakSNP13225    | <i>Kabuli</i>    | <i>Ca_Kabuli_Chr07</i>       | 45289633                       | (T/C)       |
| 13226       | CakSNP13226    | <i>Kabuli</i>    | <i>Ca_Kabuli_Chr07</i>       | 45936581                       | (C/A)       |
| 13227       | CakSNP13227    | <i>Kabuli</i>    | <i>Ca_Kabuli_Chr07</i>       | 46053109                       | (G/A)       |
| 13228       | CakSNP13228    | <i>Kabuli</i>    | <i>Ca_Kabuli_Chr07</i>       | 46394656                       | (A/G)       |
| 13229       | CakSNP13229    | <i>Kabuli</i>    | <i>Ca_Kabuli_Chr07</i>       | 46485934                       | (A/G)       |
| 13230       | CakSNP13230    | <i>Kabuli</i>    | <i>Ca_Kabuli_Chr07</i>       | 46747255                       | (A/C)       |
| 13231       | CakSNP13231    | <i>Kabuli</i>    | <i>Ca_Kabuli_Chr07</i>       | 46747283                       | (T/C)       |
| 13232       | CakSNP13232    | <i>Kabuli</i>    | <i>Ca_Kabuli_Chr07</i>       | 46747290                       | (G/T)       |
| 13233       | CakSNP13233    | <i>Kabuli</i>    | <i>Ca_Kabuli_Chr07</i>       | 46747295                       | (G/C)       |
| 13234       | CakSNP13234    | <i>Kabuli</i>    | <i>Ca_Kabuli_Chr07</i>       | 46747309                       | (C/T)       |
| 13235       | CakSNP13235    | <i>Kabuli</i>    | <i>Ca_Kabuli_Chr07</i>       | 46747330                       | (G/A)       |
| 13236       | CakSNP13236    | <i>Kabuli</i>    | <i>Ca_Kabuli_Chr07</i>       | 46823471                       | (T/G)       |
| 13237       | CakSNP13237    | <i>Kabuli</i>    | <i>Ca_Kabuli_Chr07</i>       | 46823949                       | (G/T)       |
| 13238       | CakSNP13238    | <i>Kabuli</i>    | <i>Ca_Kabuli_Chr07</i>       | 46826036                       | (T/A)       |
| 13239       | CakSNP13239    | <i>Kabuli</i>    | <i>Ca_Kabuli_Chr07</i>       | 46826030                       | (T/C)       |
| 13240       | CakSNP13240    | <i>Kabuli</i>    | <i>Ca_Kabuli_Chr07</i>       | 46826028                       | (C/A)       |
| 13241       | CakSNP13241    | <i>Kabuli</i>    | <i>Ca_Kabuli_Chr07</i>       | 46826020                       | (G/A)       |
| 13242       | CakSNP13242    | <i>Kabuli</i>    | <i>Ca_Kabuli_Chr07</i>       | 46826015                       | (G/A)       |
| 13243       | CakSNP13243    | <i>Kabuli</i>    | <i>Ca_Kabuli_Chr07</i>       | 46826008                       | (A/T)       |
| 13244       | CakSNP13244    | <i>Kabuli</i>    | <i>Ca_Kabuli_Chr07</i>       | 46825997                       | (A/G)       |
| 13245       | CakSNP13245    | <i>Kabuli</i>    | <i>Ca_Kabuli_Chr07</i>       | 46825992                       | (T/G)       |
| 13246       | CakSNP13246    | <i>Kabuli</i>    | <i>Ca_Kabuli_Chr07</i>       | 46825985                       | (T/G)       |
| 13247       | CakSNP13247    | <i>Kabuli</i>    | <i>Ca_Kabuli_Chr07</i>       | 46825957                       | (A/T)       |
| 13248       | CakSNP13248    | <i>Kabuli</i>    | <i>Ca_Kabuli_Chr07</i>       | 46825952                       | (A/G)       |
| 13249       | CakSNP13249    | <i>Kabuli</i>    | <i>Ca_Kabuli_Chr07</i>       | 47127331                       | (T/G)       |
| 13250       | CakSNP13250    | <i>Kabuli</i>    | <i>Ca_Kabuli_Chr07</i>       | 47127342                       | (T/G)       |
| 13251       | CakSNP13251    | <i>Kabuli</i>    | <i>Ca_Kabuli_Chr07</i>       | 47127343                       | (C/T)       |
| 13252       | CakSNP13252    | <i>Kabuli</i>    | <i>Ca_Kabuli_Chr07</i>       | 47159646                       | (A/C)       |
| 13253       | CakSNP13253    | <i>Kabuli</i>    | <i>Ca_Kabuli_Chr07</i>       | 47335940                       | (G/A)       |
| 13254       | CakSNP13254    | <i>Kabuli</i>    | <i>Ca_Kabuli_Chr07</i>       | 47335916                       | (C/G)       |
| 13255       | CakSNP13255    | <i>Kabuli</i>    | <i>Ca_Kabuli_Chr07</i>       | 47524173                       | (A/C)       |
| 13256       | CakSNP13256    | <i>Kabuli</i>    | <i>Ca_Kabuli_Chr07</i>       | 47554330                       | (C/G)       |
| 13257       | CakSNP13257    | <i>Kabuli</i>    | <i>Ca_Kabuli_Chr07</i>       | 47694706                       | (A/C)       |
| 13258       | CakSNP13258    | <i>Kabuli</i>    | <i>Ca_Kabuli_Chr07</i>       | 47839934                       | (G/A)       |

| <b>S.N.</b> | <b>SNP IDs</b> | <b>Cultivars</b> | <b>Chromosomes/scaffolds</b> | <b>Physical positions (bp)</b> | <b>SNPs</b> |
|-------------|----------------|------------------|------------------------------|--------------------------------|-------------|
| 13259       | CakSNP13259    | <i>Kabuli</i>    | <i>Ca_Kabuli_Chr07</i>       | 47839952                       | (G/T)       |
| 13260       | CakSNP13260    | <i>Kabuli</i>    | <i>Ca_Kabuli_Chr07</i>       | 47840034                       | (A/G)       |
| 13261       | CakSNP13261    | <i>Kabuli</i>    | <i>Ca_Kabuli_Chr07</i>       | 47840092                       | (A/C)       |
| 13262       | CakSNP13262    | <i>Kabuli</i>    | <i>Ca_Kabuli_Chr07</i>       | 48102586                       | (G/T)       |
| 13263       | CakSNP13263    | <i>Kabuli</i>    | <i>Ca_Kabuli_Chr07</i>       | 48200865                       | (A/G)       |
| 13264       | CakSNP13264    | <i>Kabuli</i>    | <i>Ca_Kabuli_Chr07</i>       | 48200852                       | (G/A)       |
| 13265       | CakSNP13265    | <i>Kabuli</i>    | <i>Ca_Kabuli_Chr07</i>       | 48200822                       | (G/A)       |
| 13266       | CakSNP13266    | <i>Kabuli</i>    | <i>Ca_Kabuli_Chr07</i>       | 48200820                       | (A/C)       |
| 13267       | CakSNP13267    | <i>Kabuli</i>    | <i>Ca_Kabuli_Chr07</i>       | 48200823                       | (G/A)       |
| 13268       | CakSNP13268    | <i>Kabuli</i>    | <i>Ca_Kabuli_Chr07</i>       | 48200848                       | (T/G)       |
| 13269       | CakSNP13269    | <i>Kabuli</i>    | <i>Ca_Kabuli_Chr07</i>       | 48509506                       | (G/T)       |
| 13270       | CakSNP13270    | <i>Kabuli</i>    | <i>Ca_Kabuli_Chr08</i>       | 54095                          | (A/C)       |
| 13271       | CakSNP13271    | <i>Kabuli</i>    | <i>Ca_Kabuli_Chr08</i>       | 85693                          | (T/G)       |
| 13272       | CakSNP13272    | <i>Kabuli</i>    | <i>Ca_Kabuli_Chr08</i>       | 85697                          | (G/A)       |
| 13273       | CakSNP13273    | <i>Kabuli</i>    | <i>Ca_Kabuli_Chr08</i>       | 85707                          | (C/A)       |
| 13274       | CakSNP13274    | <i>Kabuli</i>    | <i>Ca_Kabuli_Chr08</i>       | 85710                          | (C/A)       |
| 13275       | CakSNP13275    | <i>Kabuli</i>    | <i>Ca_Kabuli_Chr08</i>       | 158986                         | (C/G)       |
| 13276       | CakSNP13276    | <i>Kabuli</i>    | <i>Ca_Kabuli_Chr08</i>       | 177457                         | (C/T)       |
| 13277       | CakSNP13277    | <i>Kabuli</i>    | <i>Ca_Kabuli_Chr08</i>       | 177436                         | (A/G)       |
| 13278       | CakSNP13278    | <i>Kabuli</i>    | <i>Ca_Kabuli_Chr08</i>       | 177405                         | (G/A)       |
| 13279       | CakSNP13279    | <i>Kabuli</i>    | <i>Ca_Kabuli_Chr08</i>       | 184444                         | (G/A)       |
| 13280       | CakSNP13280    | <i>Kabuli</i>    | <i>Ca_Kabuli_Chr08</i>       | 218813                         | (C/T)       |
| 13281       | CakSNP13281    | <i>Kabuli</i>    | <i>Ca_Kabuli_Chr08</i>       | 218828                         | (T/G)       |
| 13282       | CakSNP13282    | <i>Kabuli</i>    | <i>Ca_Kabuli_Chr08</i>       | 218957                         | (G/T)       |
| 13283       | CakSNP13283    | <i>Kabuli</i>    | <i>Ca_Kabuli_Chr08</i>       | 218928                         | (A/G)       |
| 13284       | CakSNP13284    | <i>Kabuli</i>    | <i>Ca_Kabuli_Chr08</i>       | 249654                         | (A/C)       |
| 13285       | CakSNP13285    | <i>Kabuli</i>    | <i>Ca_Kabuli_Chr08</i>       | 253786                         | (G/A)       |
| 13286       | CakSNP13286    | <i>Kabuli</i>    | <i>Ca_Kabuli_Chr08</i>       | 281622                         | (G/A)       |
| 13287       | CakSNP13287    | <i>Kabuli</i>    | <i>Ca_Kabuli_Chr08</i>       | 281608                         | (T/A)       |
| 13288       | CakSNP13288    | <i>Kabuli</i>    | <i>Ca_Kabuli_Chr08</i>       | 281630                         | (A/C)       |
| 13289       | CakSNP13289    | <i>Kabuli</i>    | <i>Ca_Kabuli_Chr08</i>       | 283147                         | (C/T)       |
| 13290       | CakSNP13290    | <i>Kabuli</i>    | <i>Ca_Kabuli_Chr08</i>       | 285779                         | (G/A)       |
| 13291       | CakSNP13291    | <i>Kabuli</i>    | <i>Ca_Kabuli_Chr08</i>       | 356295                         | (A/T)       |
| 13292       | CakSNP13292    | <i>Kabuli</i>    | <i>Ca_Kabuli_Chr08</i>       | 411967                         | (G/A)       |
| 13293       | CakSNP13293    | <i>Kabuli</i>    | <i>Ca_Kabuli_Chr08</i>       | 499819                         | (A/C)       |
| 13294       | CakSNP13294    | <i>Kabuli</i>    | <i>Ca_Kabuli_Chr08</i>       | 499890                         | (T/C)       |
| 13295       | CakSNP13295    | <i>Kabuli</i>    | <i>Ca_Kabuli_Chr08</i>       | 510824                         | (G/A)       |
| 13296       | CakSNP13296    | <i>Kabuli</i>    | <i>Ca_Kabuli_Chr08</i>       | 560477                         | (C/T)       |
| 13297       | CakSNP13297    | <i>Kabuli</i>    | <i>Ca_Kabuli_Chr08</i>       | 560451                         | (C/T)       |

| <b>S.N.</b> | <b>SNP IDs</b> | <b>Cultivars</b> | <b>Chromosomes/scaffolds</b> | <b>Physical positions (bp)</b> | <b>SNPs</b> |
|-------------|----------------|------------------|------------------------------|--------------------------------|-------------|
| 13298       | CakSNP13298    | <i>Kabuli</i>    | <i>Ca_Kabuli_Chr08</i>       | 560604                         | (T/G)       |
| 13299       | CakSNP13299    | <i>Kabuli</i>    | <i>Ca_Kabuli_Chr08</i>       | 560746                         | (A/G)       |
| 13300       | CakSNP13300    | <i>Kabuli</i>    | <i>Ca_Kabuli_Chr08</i>       | 566112                         | (A/G)       |
| 13301       | CakSNP13301    | <i>Kabuli</i>    | <i>Ca_Kabuli_Chr08</i>       | 566107                         | (C/T)       |
| 13302       | CakSNP13302    | <i>Kabuli</i>    | <i>Ca_Kabuli_Chr08</i>       | 566094                         | (A/G)       |
| 13303       | CakSNP13303    | <i>Kabuli</i>    | <i>Ca_Kabuli_Chr08</i>       | 596171                         | (C/T)       |
| 13304       | CakSNP13304    | <i>Kabuli</i>    | <i>Ca_Kabuli_Chr08</i>       | 614324                         | (G/A)       |
| 13305       | CakSNP13305    | <i>Kabuli</i>    | <i>Ca_Kabuli_Chr08</i>       | 614301                         | (C/A)       |
| 13306       | CakSNP13306    | <i>Kabuli</i>    | <i>Ca_Kabuli_Chr08</i>       | 619605                         | (T/C)       |
| 13307       | CakSNP13307    | <i>Kabuli</i>    | <i>Ca_Kabuli_Chr08</i>       | 634862                         | (C/T)       |
| 13308       | CakSNP13308    | <i>Kabuli</i>    | <i>Ca_Kabuli_Chr08</i>       | 634843                         | (G/A)       |
| 13309       | CakSNP13309    | <i>Kabuli</i>    | <i>Ca_Kabuli_Chr08</i>       | 634818                         | (G/T)       |
| 13310       | CakSNP13310    | <i>Kabuli</i>    | <i>Ca_Kabuli_Chr08</i>       | 634921                         | (C/G)       |
| 13311       | CakSNP13311    | <i>Kabuli</i>    | <i>Ca_Kabuli_Chr08</i>       | 649491                         | (A/C)       |
| 13312       | CakSNP13312    | <i>Kabuli</i>    | <i>Ca_Kabuli_Chr08</i>       | 660610                         | (T/G)       |
| 13313       | CakSNP13313    | <i>Kabuli</i>    | <i>Ca_Kabuli_Chr08</i>       | 666294                         | (G/A)       |
| 13314       | CakSNP13314    | <i>Kabuli</i>    | <i>Ca_Kabuli_Chr08</i>       | 666288                         | (A/T)       |
| 13315       | CakSNP13315    | <i>Kabuli</i>    | <i>Ca_Kabuli_Chr08</i>       | 666284                         | (T/A)       |
| 13316       | CakSNP13316    | <i>Kabuli</i>    | <i>Ca_Kabuli_Chr08</i>       | 666274                         | (T/G)       |
| 13317       | CakSNP13317    | <i>Kabuli</i>    | <i>Ca_Kabuli_Chr08</i>       | 672962                         | (C/T)       |
| 13318       | CakSNP13318    | <i>Kabuli</i>    | <i>Ca_Kabuli_Chr08</i>       | 673820                         | (A/G)       |
| 13319       | CakSNP13319    | <i>Kabuli</i>    | <i>Ca_Kabuli_Chr08</i>       | 674902                         | (T/G)       |
| 13320       | CakSNP13320    | <i>Kabuli</i>    | <i>Ca_Kabuli_Chr08</i>       | 701803                         | (C/T)       |
| 13321       | CakSNP13321    | <i>Kabuli</i>    | <i>Ca_Kabuli_Chr08</i>       | 701811                         | (T/G)       |
| 13322       | CakSNP13322    | <i>Kabuli</i>    | <i>Ca_Kabuli_Chr08</i>       | 701837                         | (G/A)       |
| 13323       | CakSNP13323    | <i>Kabuli</i>    | <i>Ca_Kabuli_Chr08</i>       | 706514                         | (T/C)       |
| 13324       | CakSNP13324    | <i>Kabuli</i>    | <i>Ca_Kabuli_Chr08</i>       | 706482                         | (G/C)       |
| 13325       | CakSNP13325    | <i>Kabuli</i>    | <i>Ca_Kabuli_Chr08</i>       | 706614                         | (C/T)       |
| 13326       | CakSNP13326    | <i>Kabuli</i>    | <i>Ca_Kabuli_Chr08</i>       | 706793                         | (A/G)       |
| 13327       | CakSNP13327    | <i>Kabuli</i>    | <i>Ca_Kabuli_Chr08</i>       | 706800                         | (G/A)       |
| 13328       | CakSNP13328    | <i>Kabuli</i>    | <i>Ca_Kabuli_Chr08</i>       | 709063                         | (T/C)       |
| 13329       | CakSNP13329    | <i>Kabuli</i>    | <i>Ca_Kabuli_Chr08</i>       | 709094                         | (T/C)       |
| 13330       | CakSNP13330    | <i>Kabuli</i>    | <i>Ca_Kabuli_Chr08</i>       | 709124                         | (A/T)       |
| 13331       | CakSNP13331    | <i>Kabuli</i>    | <i>Ca_Kabuli_Chr08</i>       | 714967                         | (A/G)       |
| 13332       | CakSNP13332    | <i>Kabuli</i>    | <i>Ca_Kabuli_Chr08</i>       | 714974                         | (G/A)       |
| 13333       | CakSNP13333    | <i>Kabuli</i>    | <i>Ca_Kabuli_Chr08</i>       | 777760                         | (A/T)       |
| 13334       | CakSNP13334    | <i>Kabuli</i>    | <i>Ca_Kabuli_Chr08</i>       | 777772                         | (G/A)       |
| 13335       | CakSNP13335    | <i>Kabuli</i>    | <i>Ca_Kabuli_Chr08</i>       | 777776                         | (C/G)       |
| 13336       | CakSNP13336    | <i>Kabuli</i>    | <i>Ca_Kabuli_Chr08</i>       | 779589                         | (C/G)       |

| <b>S.N.</b> | <b>SNP IDs</b> | <b>Cultivars</b> | <b>Chromosomes/scaffolds</b> | <b>Physical positions (bp)</b> | <b>SNPs</b> |
|-------------|----------------|------------------|------------------------------|--------------------------------|-------------|
| 13337       | CakSNP13337    | <i>Kabuli</i>    | <i>Ca_Kabuli_Chr08</i>       | 779611                         | (T/C)       |
| 13338       | CakSNP13338    | <i>Kabuli</i>    | <i>Ca_Kabuli_Chr08</i>       | 779640                         | (T/C)       |
| 13339       | CakSNP13339    | <i>Kabuli</i>    | <i>Ca_Kabuli_Chr08</i>       | 817321                         | (T/G)       |
| 13340       | CakSNP13340    | <i>Kabuli</i>    | <i>Ca_Kabuli_Chr08</i>       | 822302                         | (A/G)       |
| 13341       | CakSNP13341    | <i>Kabuli</i>    | <i>Ca_Kabuli_Chr08</i>       | 822942                         | (T/G)       |
| 13342       | CakSNP13342    | <i>Kabuli</i>    | <i>Ca_Kabuli_Chr08</i>       | 822976                         | (C/T)       |
| 13343       | CakSNP13343    | <i>Kabuli</i>    | <i>Ca_Kabuli_Chr08</i>       | 839924                         | (C/G)       |
| 13344       | CakSNP13344    | <i>Kabuli</i>    | <i>Ca_Kabuli_Chr08</i>       | 855332                         | (G/A)       |
| 13345       | CakSNP13345    | <i>Kabuli</i>    | <i>Ca_Kabuli_Chr08</i>       | 866741                         | (A/C)       |
| 13346       | CakSNP13346    | <i>Kabuli</i>    | <i>Ca_Kabuli_Chr08</i>       | 871666                         | (C/G)       |
| 13347       | CakSNP13347    | <i>Kabuli</i>    | <i>Ca_Kabuli_Chr08</i>       | 875236                         | (T/G)       |
| 13348       | CakSNP13348    | <i>Kabuli</i>    | <i>Ca_Kabuli_Chr08</i>       | 894184                         | (C/A)       |
| 13349       | CakSNP13349    | <i>Kabuli</i>    | <i>Ca_Kabuli_Chr08</i>       | 895883                         | (G/A)       |
| 13350       | CakSNP13350    | <i>Kabuli</i>    | <i>Ca_Kabuli_Chr08</i>       | 895947                         | (C/T)       |
| 13351       | CakSNP13351    | <i>Kabuli</i>    | <i>Ca_Kabuli_Chr08</i>       | 897417                         | (T/C)       |
| 13352       | CakSNP13352    | <i>Kabuli</i>    | <i>Ca_Kabuli_Chr08</i>       | 898089                         | (C/T)       |
| 13353       | CakSNP13353    | <i>Kabuli</i>    | <i>Ca_Kabuli_Chr08</i>       | 898150                         | (C/A)       |
| 13354       | CakSNP13354    | <i>Kabuli</i>    | <i>Ca_Kabuli_Chr08</i>       | 898152                         | (A/G)       |
| 13355       | CakSNP13355    | <i>Kabuli</i>    | <i>Ca_Kabuli_Chr08</i>       | 898173                         | (G/T)       |
| 13356       | CakSNP13356    | <i>Kabuli</i>    | <i>Ca_Kabuli_Chr08</i>       | 898164                         | (G/T)       |
| 13357       | CakSNP13357    | <i>Kabuli</i>    | <i>Ca_Kabuli_Chr08</i>       | 898226                         | (C/G)       |
| 13358       | CakSNP13358    | <i>Kabuli</i>    | <i>Ca_Kabuli_Chr08</i>       | 898251                         | (G/T)       |
| 13359       | CakSNP13359    | <i>Kabuli</i>    | <i>Ca_Kabuli_Chr08</i>       | 919690                         | (T/C)       |
| 13360       | CakSNP13360    | <i>Kabuli</i>    | <i>Ca_Kabuli_Chr08</i>       | 923820                         | (T/C)       |
| 13361       | CakSNP13361    | <i>Kabuli</i>    | <i>Ca_Kabuli_Chr08</i>       | 924720                         | (G/T)       |
| 13362       | CakSNP13362    | <i>Kabuli</i>    | <i>Ca_Kabuli_Chr08</i>       | 924681                         | (C/T)       |
| 13363       | CakSNP13363    | <i>Kabuli</i>    | <i>Ca_Kabuli_Chr08</i>       | 924715                         | (A/G)       |
| 13364       | CakSNP13364    | <i>Kabuli</i>    | <i>Ca_Kabuli_Chr08</i>       | 924732                         | (G/T)       |
| 13365       | CakSNP13365    | <i>Kabuli</i>    | <i>Ca_Kabuli_Chr08</i>       | 974170                         | (T/C)       |
| 13366       | CakSNP13366    | <i>Kabuli</i>    | <i>Ca_Kabuli_Chr08</i>       | 974159                         | (T/G)       |
| 13367       | CakSNP13367    | <i>Kabuli</i>    | <i>Ca_Kabuli_Chr08</i>       | 1011333                        | (C/T)       |
| 13368       | CakSNP13368    | <i>Kabuli</i>    | <i>Ca_Kabuli_Chr08</i>       | 1011320                        | (G/T)       |
| 13369       | CakSNP13369    | <i>Kabuli</i>    | <i>Ca_Kabuli_Chr08</i>       | 1011327                        | (G/A)       |
| 13370       | CakSNP13370    | <i>Kabuli</i>    | <i>Ca_Kabuli_Chr08</i>       | 1043905                        | (T/C)       |
| 13371       | CakSNP13371    | <i>Kabuli</i>    | <i>Ca_Kabuli_Chr08</i>       | 1070728                        | (T/C)       |
| 13372       | CakSNP13372    | <i>Kabuli</i>    | <i>Ca_Kabuli_Chr08</i>       | 1077334                        | (C/T)       |
| 13373       | CakSNP13373    | <i>Kabuli</i>    | <i>Ca_Kabuli_Chr08</i>       | 1077430                        | (C/T)       |
| 13374       | CakSNP13374    | <i>Kabuli</i>    | <i>Ca_Kabuli_Chr08</i>       | 1119568                        | (T/C)       |
| 13375       | CakSNP13375    | <i>Kabuli</i>    | <i>Ca_Kabuli_Chr08</i>       | 1119781                        | (A/G)       |



| <b>S.N.</b> | <b>SNP IDs</b> | <b>Cultivars</b> | <b>Chromosomes/scaffolds</b> | <b>Physical positions (bp)</b> | <b>SNPs</b> |
|-------------|----------------|------------------|------------------------------|--------------------------------|-------------|
| 13376       | CakSNP13376    | <i>Kabuli</i>    | <i>Ca_Kabuli_Chr08</i>       | 1119773                        | (T/G)       |
| 13377       | CakSNP13377    | <i>Kabuli</i>    | <i>Ca_Kabuli_Chr08</i>       | 1119761                        | (G/T)       |
| 13378       | CakSNP13378    | <i>Kabuli</i>    | <i>Ca_Kabuli_Chr08</i>       | 1138275                        | (G/A)       |
| 13379       | CakSNP13379    | <i>Kabuli</i>    | <i>Ca_Kabuli_Chr08</i>       | 1138394                        | (A/G)       |
| 13380       | CakSNP13380    | <i>Kabuli</i>    | <i>Ca_Kabuli_Chr08</i>       | 1155597                        | (C/T)       |
| 13381       | CakSNP13381    | <i>Kabuli</i>    | <i>Ca_Kabuli_Chr08</i>       | 1155636                        | (T/C)       |
| 13382       | CakSNP13382    | <i>Kabuli</i>    | <i>Ca_Kabuli_Chr08</i>       | 1155639                        | (T/A)       |
| 13383       | CakSNP13383    | <i>Kabuli</i>    | <i>Ca_Kabuli_Chr08</i>       | 1155641                        | (C/G)       |
| 13384       | CakSNP13384    | <i>Kabuli</i>    | <i>Ca_Kabuli_Chr08</i>       | 1174369                        | (A/G)       |
| 13385       | CakSNP13385    | <i>Kabuli</i>    | <i>Ca_Kabuli_Chr08</i>       | 1193297                        | (C/T)       |
| 13386       | CakSNP13386    | <i>Kabuli</i>    | <i>Ca_Kabuli_Chr08</i>       | 1194886                        | (G/A)       |
| 13387       | CakSNP13387    | <i>Kabuli</i>    | <i>Ca_Kabuli_Chr08</i>       | 1194888                        | (A/G)       |
| 13388       | CakSNP13388    | <i>Kabuli</i>    | <i>Ca_Kabuli_Chr08</i>       | 1241739                        | (C/T)       |
| 13389       | CakSNP13389    | <i>Kabuli</i>    | <i>Ca_Kabuli_Chr08</i>       | 1262576                        | (T/C)       |
| 13390       | CakSNP13390    | <i>Kabuli</i>    | <i>Ca_Kabuli_Chr08</i>       | 1262561                        | (C/T)       |
| 13391       | CakSNP13391    | <i>Kabuli</i>    | <i>Ca_Kabuli_Chr08</i>       | 1262660                        | (C/A)       |
| 13392       | CakSNP13392    | <i>Kabuli</i>    | <i>Ca_Kabuli_Chr08</i>       | 1262686                        | (T/G)       |
| 13393       | CakSNP13393    | <i>Kabuli</i>    | <i>Ca_Kabuli_Chr08</i>       | 1265537                        | (G/A)       |
| 13394       | CakSNP13394    | <i>Kabuli</i>    | <i>Ca_Kabuli_Chr08</i>       | 1265535                        | (A/G)       |
| 13395       | CakSNP13395    | <i>Kabuli</i>    | <i>Ca_Kabuli_Chr08</i>       | 1265509                        | (T/C)       |
| 13396       | CakSNP13396    | <i>Kabuli</i>    | <i>Ca_Kabuli_Chr08</i>       | 1265595                        | (G/T)       |
| 13397       | CakSNP13397    | <i>Kabuli</i>    | <i>Ca_Kabuli_Chr08</i>       | 1265579                        | (A/G)       |
| 13398       | CakSNP13398    | <i>Kabuli</i>    | <i>Ca_Kabuli_Chr08</i>       | 1265577                        | (T/G)       |
| 13399       | CakSNP13399    | <i>Kabuli</i>    | <i>Ca_Kabuli_Chr08</i>       | 1382266                        | (G/A)       |
| 13400       | CakSNP13400    | <i>Kabuli</i>    | <i>Ca_Kabuli_Chr08</i>       | 1382433                        | (G/T)       |
| 13401       | CakSNP13401    | <i>Kabuli</i>    | <i>Ca_Kabuli_Chr08</i>       | 1382454                        | (A/C)       |
| 13402       | CakSNP13402    | <i>Kabuli</i>    | <i>Ca_Kabuli_Chr08</i>       | 1433436                        | (T/C)       |
| 13403       | CakSNP13403    | <i>Kabuli</i>    | <i>Ca_Kabuli_Chr08</i>       | 1477523                        | (T/C)       |
| 13404       | CakSNP13404    | <i>Kabuli</i>    | <i>Ca_Kabuli_Chr08</i>       | 1487202                        | (G/C)       |
| 13405       | CakSNP13405    | <i>Kabuli</i>    | <i>Ca_Kabuli_Chr08</i>       | 1503621                        | (C/T)       |
| 13406       | CakSNP13406    | <i>Kabuli</i>    | <i>Ca_Kabuli_Chr08</i>       | 1503595                        | (C/T)       |
| 13407       | CakSNP13407    | <i>Kabuli</i>    | <i>Ca_Kabuli_Chr08</i>       | 1503588                        | (T/C)       |
| 13408       | CakSNP13408    | <i>Kabuli</i>    | <i>Ca_Kabuli_Chr08</i>       | 1504859                        | (A/G)       |
| 13409       | CakSNP13409    | <i>Kabuli</i>    | <i>Ca_Kabuli_Chr08</i>       | 1507709                        | (T/G)       |
| 13410       | CakSNP13410    | <i>Kabuli</i>    | <i>Ca_Kabuli_Chr08</i>       | 1507782                        | (G/C)       |
| 13411       | CakSNP13411    | <i>Kabuli</i>    | <i>Ca_Kabuli_Chr08</i>       | 1518285                        | (A/C)       |
| 13412       | CakSNP13412    | <i>Kabuli</i>    | <i>Ca_Kabuli_Chr08</i>       | 1518297                        | (T/G)       |
| 13413       | CakSNP13413    | <i>Kabuli</i>    | <i>Ca_Kabuli_Chr08</i>       | 1518355                        | (G/A)       |
| 13414       | CakSNP13414    | <i>Kabuli</i>    | <i>Ca_Kabuli_Chr08</i>       | 1534461                        | (A/C)       |

| <b>S.N.</b> | <b>SNP IDs</b> | <b>Cultivars</b> | <b>Chromosomes/scaffolds</b> | <b>Physical positions (bp)</b> | <b>SNPs</b> |
|-------------|----------------|------------------|------------------------------|--------------------------------|-------------|
| 13415       | CakSNP13415    | <i>Kabuli</i>    | <i>Ca_Kabuli_Chr08</i>       | 1544916                        | (C/T)       |
| 13416       | CakSNP13416    | <i>Kabuli</i>    | <i>Ca_Kabuli_Chr08</i>       | 1552082                        | (T/A)       |
| 13417       | CakSNP13417    | <i>Kabuli</i>    | <i>Ca_Kabuli_Chr08</i>       | 1552143                        | (A/G)       |
| 13418       | CakSNP13418    | <i>Kabuli</i>    | <i>Ca_Kabuli_Chr08</i>       | 1554964                        | (T/C)       |
| 13419       | CakSNP13419    | <i>Kabuli</i>    | <i>Ca_Kabuli_Chr08</i>       | 1555017                        | (C/A)       |
| 13420       | CakSNP13420    | <i>Kabuli</i>    | <i>Ca_Kabuli_Chr08</i>       | 1555122                        | (A/G)       |
| 13421       | CakSNP13421    | <i>Kabuli</i>    | <i>Ca_Kabuli_Chr08</i>       | 1557492                        | (C/T)       |
| 13422       | CakSNP13422    | <i>Kabuli</i>    | <i>Ca_Kabuli_Chr08</i>       | 1573877                        | (G/T)       |
| 13423       | CakSNP13423    | <i>Kabuli</i>    | <i>Ca_Kabuli_Chr08</i>       | 1612107                        | (G/A)       |
| 13424       | CakSNP13424    | <i>Kabuli</i>    | <i>Ca_Kabuli_Chr08</i>       | 1612099                        | (A/G)       |
| 13425       | CakSNP13425    | <i>Kabuli</i>    | <i>Ca_Kabuli_Chr08</i>       | 1612221                        | (C/G)       |
| 13426       | CakSNP13426    | <i>Kabuli</i>    | <i>Ca_Kabuli_Chr08</i>       | 1667832                        | (T/C)       |
| 13427       | CakSNP13427    | <i>Kabuli</i>    | <i>Ca_Kabuli_Chr08</i>       | 1675895                        | (C/T)       |
| 13428       | CakSNP13428    | <i>Kabuli</i>    | <i>Ca_Kabuli_Chr08</i>       | 1675888                        | (C/T)       |
| 13429       | CakSNP13429    | <i>Kabuli</i>    | <i>Ca_Kabuli_Chr08</i>       | 1708743                        | (C/T)       |
| 13430       | CakSNP13430    | <i>Kabuli</i>    | <i>Ca_Kabuli_Chr08</i>       | 1708860                        | (T/C)       |
| 13431       | CakSNP13431    | <i>Kabuli</i>    | <i>Ca_Kabuli_Chr08</i>       | 1718032                        | (C/T)       |
| 13432       | CakSNP13432    | <i>Kabuli</i>    | <i>Ca_Kabuli_Chr08</i>       | 1723593                        | (G/A)       |
| 13433       | CakSNP13433    | <i>Kabuli</i>    | <i>Ca_Kabuli_Chr08</i>       | 1743097                        | (G/A)       |
| 13434       | CakSNP13434    | <i>Kabuli</i>    | <i>Ca_Kabuli_Chr08</i>       | 1747523                        | (T/A)       |
| 13435       | CakSNP13435    | <i>Kabuli</i>    | <i>Ca_Kabuli_Chr08</i>       | 1747522                        | (T/C)       |
| 13436       | CakSNP13436    | <i>Kabuli</i>    | <i>Ca_Kabuli_Chr08</i>       | 1782034                        | (C/G)       |
| 13437       | CakSNP13437    | <i>Kabuli</i>    | <i>Ca_Kabuli_Chr08</i>       | 1794755                        | (C/A)       |
| 13438       | CakSNP13438    | <i>Kabuli</i>    | <i>Ca_Kabuli_Chr08</i>       | 1794756                        | (G/T)       |
| 13439       | CakSNP13439    | <i>Kabuli</i>    | <i>Ca_Kabuli_Chr08</i>       | 1794759                        | (C/T)       |
| 13440       | CakSNP13440    | <i>Kabuli</i>    | <i>Ca_Kabuli_Chr08</i>       | 1794810                        | (G/A)       |
| 13441       | CakSNP13441    | <i>Kabuli</i>    | <i>Ca_Kabuli_Chr08</i>       | 1817388                        | (T/C)       |
| 13442       | CakSNP13442    | <i>Kabuli</i>    | <i>Ca_Kabuli_Chr08</i>       | 1830230                        | (A/T)       |
| 13443       | CakSNP13443    | <i>Kabuli</i>    | <i>Ca_Kabuli_Chr08</i>       | 1830348                        | (T/C)       |
| 13444       | CakSNP13444    | <i>Kabuli</i>    | <i>Ca_Kabuli_Chr08</i>       | 1846478                        | (A/G)       |
| 13445       | CakSNP13445    | <i>Kabuli</i>    | <i>Ca_Kabuli_Chr08</i>       | 1893613                        | (T/C)       |
| 13446       | CakSNP13446    | <i>Kabuli</i>    | <i>Ca_Kabuli_Chr08</i>       | 1932975                        | (T/C)       |
| 13447       | CakSNP13447    | <i>Kabuli</i>    | <i>Ca_Kabuli_Chr08</i>       | 1932981                        | (T/C)       |
| 13448       | CakSNP13448    | <i>Kabuli</i>    | <i>Ca_Kabuli_Chr08</i>       | 1932990                        | (A/C)       |
| 13449       | CakSNP13449    | <i>Kabuli</i>    | <i>Ca_Kabuli_Chr08</i>       | 1932993                        | (C/T)       |
| 13450       | CakSNP13450    | <i>Kabuli</i>    | <i>Ca_Kabuli_Chr08</i>       | 1932997                        | (G/T)       |
| 13451       | CakSNP13451    | <i>Kabuli</i>    | <i>Ca_Kabuli_Chr08</i>       | 1933026                        | (G/A)       |
| 13452       | CakSNP13452    | <i>Kabuli</i>    | <i>Ca_Kabuli_Chr08</i>       | 1933064                        | (G/C)       |
| 13453       | CakSNP13453    | <i>Kabuli</i>    | <i>Ca_Kabuli_Chr08</i>       | 1933053                        | (G/A)       |

| <b>S.N.</b> | <b>SNP IDs</b> | <b>Cultivars</b> | <b>Chromosomes/scaffolds</b> | <b>Physical positions (bp)</b> | <b>SNPs</b> |
|-------------|----------------|------------------|------------------------------|--------------------------------|-------------|
| 13454       | CakSNP13454    | <i>Kabuli</i>    | <i>Ca_Kabuli_Chr08</i>       | 1933052                        | (T/C)       |
| 13455       | CakSNP13455    | <i>Kabuli</i>    | <i>Ca_Kabuli_Chr08</i>       | 1933039                        | (G/T)       |
| 13456       | CakSNP13456    | <i>Kabuli</i>    | <i>Ca_Kabuli_Chr08</i>       | 1933035                        | (T/A)       |
| 13457       | CakSNP13457    | <i>Kabuli</i>    | <i>Ca_Kabuli_Chr08</i>       | 1958433                        | (G/C)       |
| 13458       | CakSNP13458    | <i>Kabuli</i>    | <i>Ca_Kabuli_Chr08</i>       | 1958415                        | (T/G)       |
| 13459       | CakSNP13459    | <i>Kabuli</i>    | <i>Ca_Kabuli_Chr08</i>       | 1978964                        | (G/C)       |
| 13460       | CakSNP13460    | <i>Kabuli</i>    | <i>Ca_Kabuli_Chr08</i>       | 1980189                        | (T/A)       |
| 13461       | CakSNP13461    | <i>Kabuli</i>    | <i>Ca_Kabuli_Chr08</i>       | 2004509                        | (A/G)       |
| 13462       | CakSNP13462    | <i>Kabuli</i>    | <i>Ca_Kabuli_Chr08</i>       | 2004577                        | (G/C)       |
| 13463       | CakSNP13463    | <i>Kabuli</i>    | <i>Ca_Kabuli_Chr08</i>       | 2029405                        | (C/A)       |
| 13464       | CakSNP13464    | <i>Kabuli</i>    | <i>Ca_Kabuli_Chr08</i>       | 2029384                        | (T/C)       |
| 13465       | CakSNP13465    | <i>Kabuli</i>    | <i>Ca_Kabuli_Chr08</i>       | 2052263                        | (T/G)       |
| 13466       | CakSNP13466    | <i>Kabuli</i>    | <i>Ca_Kabuli_Chr08</i>       | 2052286                        | (T/C)       |
| 13467       | CakSNP13467    | <i>Kabuli</i>    | <i>Ca_Kabuli_Chr08</i>       | 2070694                        | (G/T)       |
| 13468       | CakSNP13468    | <i>Kabuli</i>    | <i>Ca_Kabuli_Chr08</i>       | 2073807                        | (C/G)       |
| 13469       | CakSNP13469    | <i>Kabuli</i>    | <i>Ca_Kabuli_Chr08</i>       | 2074619                        | (T/G)       |
| 13470       | CakSNP13470    | <i>Kabuli</i>    | <i>Ca_Kabuli_Chr08</i>       | 2075296                        | (T/C)       |
| 13471       | CakSNP13471    | <i>Kabuli</i>    | <i>Ca_Kabuli_Chr08</i>       | 2075290                        | (G/T)       |
| 13472       | CakSNP13472    | <i>Kabuli</i>    | <i>Ca_Kabuli_Chr08</i>       | 2075278                        | (T/G)       |
| 13473       | CakSNP13473    | <i>Kabuli</i>    | <i>Ca_Kabuli_Chr08</i>       | 2079723                        | (A/G)       |
| 13474       | CakSNP13474    | <i>Kabuli</i>    | <i>Ca_Kabuli_Chr08</i>       | 2081228                        | (C/T)       |
| 13475       | CakSNP13475    | <i>Kabuli</i>    | <i>Ca_Kabuli_Chr08</i>       | 2088903                        | (T/C)       |
| 13476       | CakSNP13476    | <i>Kabuli</i>    | <i>Ca_Kabuli_Chr08</i>       | 2088892                        | (T/G)       |
| 13477       | CakSNP13477    | <i>Kabuli</i>    | <i>Ca_Kabuli_Chr08</i>       | 2090852                        | (A/G)       |
| 13478       | CakSNP13478    | <i>Kabuli</i>    | <i>Ca_Kabuli_Chr08</i>       | 2095607                        | (A/G)       |
| 13479       | CakSNP13479    | <i>Kabuli</i>    | <i>Ca_Kabuli_Chr08</i>       | 2107370                        | (C/T)       |
| 13480       | CakSNP13480    | <i>Kabuli</i>    | <i>Ca_Kabuli_Chr08</i>       | 2113823                        | (T/G)       |
| 13481       | CakSNP13481    | <i>Kabuli</i>    | <i>Ca_Kabuli_Chr08</i>       | 2113816                        | (T/C)       |
| 13482       | CakSNP13482    | <i>Kabuli</i>    | <i>Ca_Kabuli_Chr08</i>       | 2128450                        | (A/G)       |
| 13483       | CakSNP13483    | <i>Kabuli</i>    | <i>Ca_Kabuli_Chr08</i>       | 2194927                        | (G/A)       |
| 13484       | CakSNP13484    | <i>Kabuli</i>    | <i>Ca_Kabuli_Chr08</i>       | 2194898                        | (A/T)       |
| 13485       | CakSNP13485    | <i>Kabuli</i>    | <i>Ca_Kabuli_Chr08</i>       | 2250195                        | (C/G)       |
| 13486       | CakSNP13486    | <i>Kabuli</i>    | <i>Ca_Kabuli_Chr08</i>       | 2250148                        | (T/C)       |
| 13487       | CakSNP13487    | <i>Kabuli</i>    | <i>Ca_Kabuli_Chr08</i>       | 2264108                        | (G/A)       |
| 13488       | CakSNP13488    | <i>Kabuli</i>    | <i>Ca_Kabuli_Chr08</i>       | 2279413                        | (G/A)       |
| 13489       | CakSNP13489    | <i>Kabuli</i>    | <i>Ca_Kabuli_Chr08</i>       | 2309552                        | (C/G)       |
| 13490       | CakSNP13490    | <i>Kabuli</i>    | <i>Ca_Kabuli_Chr08</i>       | 2309549                        | (A/G)       |
| 13491       | CakSNP13491    | <i>Kabuli</i>    | <i>Ca_Kabuli_Chr08</i>       | 2413731                        | (A/G)       |
| 13492       | CakSNP13492    | <i>Kabuli</i>    | <i>Ca_Kabuli_Chr08</i>       | 2456352                        | (T/C)       |

| <b>S.N.</b> | <b>SNP IDs</b> | <b>Cultivars</b> | <b>Chromosomes/scaffolds</b> | <b>Physical positions (bp)</b> | <b>SNPs</b> |
|-------------|----------------|------------------|------------------------------|--------------------------------|-------------|
| 13493       | CakSNP13493    | <i>Kabuli</i>    | <i>Ca_Kabuli_Chr08</i>       | 2482834                        | (A/G)       |
| 13494       | CakSNP13494    | <i>Kabuli</i>    | <i>Ca_Kabuli_Chr08</i>       | 2482849                        | (T/C)       |
| 13495       | CakSNP13495    | <i>Kabuli</i>    | <i>Ca_Kabuli_Chr08</i>       | 2483021                        | (G/A)       |
| 13496       | CakSNP13496    | <i>Kabuli</i>    | <i>Ca_Kabuli_Chr08</i>       | 2488709                        | (A/G)       |
| 13497       | CakSNP13497    | <i>Kabuli</i>    | <i>Ca_Kabuli_Chr08</i>       | 2488769                        | (C/G)       |
| 13498       | CakSNP13498    | <i>Kabuli</i>    | <i>Ca_Kabuli_Chr08</i>       | 2488772                        | (A/G)       |
| 13499       | CakSNP13499    | <i>Kabuli</i>    | <i>Ca_Kabuli_Chr08</i>       | 2515612                        | (A/G)       |
| 13500       | CakSNP13500    | <i>Kabuli</i>    | <i>Ca_Kabuli_Chr08</i>       | 2524188                        | (A/G)       |
| 13501       | CakSNP13501    | <i>Kabuli</i>    | <i>Ca_Kabuli_Chr08</i>       | 2524148                        | (A/G)       |
| 13502       | CakSNP13502    | <i>Kabuli</i>    | <i>Ca_Kabuli_Chr08</i>       | 2539375                        | (G/A)       |
| 13503       | CakSNP13503    | <i>Kabuli</i>    | <i>Ca_Kabuli_Chr08</i>       | 2540644                        | (G/A)       |
| 13504       | CakSNP13504    | <i>Kabuli</i>    | <i>Ca_Kabuli_Chr08</i>       | 2540704                        | (A/T)       |
| 13505       | CakSNP13505    | <i>Kabuli</i>    | <i>Ca_Kabuli_Chr08</i>       | 2543156                        | (A/G)       |
| 13506       | CakSNP13506    | <i>Kabuli</i>    | <i>Ca_Kabuli_Chr08</i>       | 2545070                        | (T/A)       |
| 13507       | CakSNP13507    | <i>Kabuli</i>    | <i>Ca_Kabuli_Chr08</i>       | 2604759                        | (C/T)       |
| 13508       | CakSNP13508    | <i>Kabuli</i>    | <i>Ca_Kabuli_Chr08</i>       | 2605423                        | (A/T)       |
| 13509       | CakSNP13509    | <i>Kabuli</i>    | <i>Ca_Kabuli_Chr08</i>       | 2605460                        | (C/T)       |
| 13510       | CakSNP13510    | <i>Kabuli</i>    | <i>Ca_Kabuli_Chr08</i>       | 2621132                        | (T/A)       |
| 13511       | CakSNP13511    | <i>Kabuli</i>    | <i>Ca_Kabuli_Chr08</i>       | 2622009                        | (G/T)       |
| 13512       | CakSNP13512    | <i>Kabuli</i>    | <i>Ca_Kabuli_Chr08</i>       | 2621987                        | (C/G)       |
| 13513       | CakSNP13513    | <i>Kabuli</i>    | <i>Ca_Kabuli_Chr08</i>       | 2621973                        | (T/G)       |
| 13514       | CakSNP13514    | <i>Kabuli</i>    | <i>Ca_Kabuli_Chr08</i>       | 2651439                        | (G/T)       |
| 13515       | CakSNP13515    | <i>Kabuli</i>    | <i>Ca_Kabuli_Chr08</i>       | 2651425                        | (C/T)       |
| 13516       | CakSNP13516    | <i>Kabuli</i>    | <i>Ca_Kabuli_Chr08</i>       | 2651422                        | (T/C)       |
| 13517       | CakSNP13517    | <i>Kabuli</i>    | <i>Ca_Kabuli_Chr08</i>       | 2651393                        | (G/T)       |
| 13518       | CakSNP13518    | <i>Kabuli</i>    | <i>Ca_Kabuli_Chr08</i>       | 2651373                        | (G/T)       |
| 13519       | CakSNP13519    | <i>Kabuli</i>    | <i>Ca_Kabuli_Chr08</i>       | 2651921                        | (C/T)       |
| 13520       | CakSNP13520    | <i>Kabuli</i>    | <i>Ca_Kabuli_Chr08</i>       | 2664625                        | (T/C)       |
| 13521       | CakSNP13521    | <i>Kabuli</i>    | <i>Ca_Kabuli_Chr08</i>       | 2664711                        | (T/G)       |
| 13522       | CakSNP13522    | <i>Kabuli</i>    | <i>Ca_Kabuli_Chr08</i>       | 2722673                        | (C/A)       |
| 13523       | CakSNP13523    | <i>Kabuli</i>    | <i>Ca_Kabuli_Chr08</i>       | 2735849                        | (T/C)       |
| 13524       | CakSNP13524    | <i>Kabuli</i>    | <i>Ca_Kabuli_Chr08</i>       | 2743075                        | (T/C)       |
| 13525       | CakSNP13525    | <i>Kabuli</i>    | <i>Ca_Kabuli_Chr08</i>       | 2743088                        | (A/G)       |
| 13526       | CakSNP13526    | <i>Kabuli</i>    | <i>Ca_Kabuli_Chr08</i>       | 2743109                        | (G/C)       |
| 13527       | CakSNP13527    | <i>Kabuli</i>    | <i>Ca_Kabuli_Chr08</i>       | 2743139                        | (A/T)       |
| 13528       | CakSNP13528    | <i>Kabuli</i>    | <i>Ca_Kabuli_Chr08</i>       | 2783576                        | (T/G)       |
| 13529       | CakSNP13529    | <i>Kabuli</i>    | <i>Ca_Kabuli_Chr08</i>       | 2783655                        | (G/C)       |
| 13530       | CakSNP13530    | <i>Kabuli</i>    | <i>Ca_Kabuli_Chr08</i>       | 2827822                        | (C/T)       |
| 13531       | CakSNP13531    | <i>Kabuli</i>    | <i>Ca_Kabuli_Chr08</i>       | 2827984                        | (T/C)       |

| <b>S.N.</b> | <b>SNP IDs</b> | <b>Cultivars</b> | <b>Chromosomes/scaffolds</b> | <b>Physical positions (bp)</b> | <b>SNPs</b> |
|-------------|----------------|------------------|------------------------------|--------------------------------|-------------|
| 13532       | CakSNP13532    | <i>Kabuli</i>    | <i>Ca_Kabuli_Chr08</i>       | 2838179                        | (T/A)       |
| 13533       | CakSNP13533    | <i>Kabuli</i>    | <i>Ca_Kabuli_Chr08</i>       | 2871095                        | (G/A)       |
| 13534       | CakSNP13534    | <i>Kabuli</i>    | <i>Ca_Kabuli_Chr08</i>       | 2871064                        | (G/A)       |
| 13535       | CakSNP13535    | <i>Kabuli</i>    | <i>Ca_Kabuli_Chr08</i>       | 2888353                        | (G/T)       |
| 13536       | CakSNP13536    | <i>Kabuli</i>    | <i>Ca_Kabuli_Chr08</i>       | 2888317                        | (G/A)       |
| 13537       | CakSNP13537    | <i>Kabuli</i>    | <i>Ca_Kabuli_Chr08</i>       | 2943631                        | (G/T)       |
| 13538       | CakSNP13538    | <i>Kabuli</i>    | <i>Ca_Kabuli_Chr08</i>       | 2947498                        | (A/G)       |
| 13539       | CakSNP13539    | <i>Kabuli</i>    | <i>Ca_Kabuli_Chr08</i>       | 2974759                        | (G/C)       |
| 13540       | CakSNP13540    | <i>Kabuli</i>    | <i>Ca_Kabuli_Chr08</i>       | 2976709                        | (C/T)       |
| 13541       | CakSNP13541    | <i>Kabuli</i>    | <i>Ca_Kabuli_Chr08</i>       | 2977543                        | (T/C)       |
| 13542       | CakSNP13542    | <i>Kabuli</i>    | <i>Ca_Kabuli_Chr08</i>       | 2977628                        | (C/T)       |
| 13543       | CakSNP13543    | <i>Kabuli</i>    | <i>Ca_Kabuli_Chr08</i>       | 2977603                        | (T/A)       |
| 13544       | CakSNP13544    | <i>Kabuli</i>    | <i>Ca_Kabuli_Chr08</i>       | 3013928                        | (G/C)       |
| 13545       | CakSNP13545    | <i>Kabuli</i>    | <i>Ca_Kabuli_Chr08</i>       | 3013917                        | (G/A)       |
| 13546       | CakSNP13546    | <i>Kabuli</i>    | <i>Ca_Kabuli_Chr08</i>       | 3041947                        | (A/G)       |
| 13547       | CakSNP13547    | <i>Kabuli</i>    | <i>Ca_Kabuli_Chr08</i>       | 3041981                        | (A/G)       |
| 13548       | CakSNP13548    | <i>Kabuli</i>    | <i>Ca_Kabuli_Chr08</i>       | 3050452                        | (T/C)       |
| 13549       | CakSNP13549    | <i>Kabuli</i>    | <i>Ca_Kabuli_Chr08</i>       | 3064477                        | (G/A)       |
| 13550       | CakSNP13550    | <i>Kabuli</i>    | <i>Ca_Kabuli_Chr08</i>       | 3141617                        | (C/T)       |
| 13551       | CakSNP13551    | <i>Kabuli</i>    | <i>Ca_Kabuli_Chr08</i>       | 3171324                        | (C/T)       |
| 13552       | CakSNP13552    | <i>Kabuli</i>    | <i>Ca_Kabuli_Chr08</i>       | 3210879                        | (C/A)       |
| 13553       | CakSNP13553    | <i>Kabuli</i>    | <i>Ca_Kabuli_Chr08</i>       | 3248044                        | (A/G)       |
| 13554       | CakSNP13554    | <i>Kabuli</i>    | <i>Ca_Kabuli_Chr08</i>       | 3248104                        | (A/G)       |
| 13555       | CakSNP13555    | <i>Kabuli</i>    | <i>Ca_Kabuli_Chr08</i>       | 3250707                        | (C/T)       |
| 13556       | CakSNP13556    | <i>Kabuli</i>    | <i>Ca_Kabuli_Chr08</i>       | 3263822                        | (T/C)       |
| 13557       | CakSNP13557    | <i>Kabuli</i>    | <i>Ca_Kabuli_Chr08</i>       | 3269124                        | (G/A)       |
| 13558       | CakSNP13558    | <i>Kabuli</i>    | <i>Ca_Kabuli_Chr08</i>       | 3269118                        | (A/G)       |
| 13559       | CakSNP13559    | <i>Kabuli</i>    | <i>Ca_Kabuli_Chr08</i>       | 3269088                        | (A/C)       |
| 13560       | CakSNP13560    | <i>Kabuli</i>    | <i>Ca_Kabuli_Chr08</i>       | 3269085                        | (A/C)       |
| 13561       | CakSNP13561    | <i>Kabuli</i>    | <i>Ca_Kabuli_Chr08</i>       | 3297410                        | (T/C)       |
| 13562       | CakSNP13562    | <i>Kabuli</i>    | <i>Ca_Kabuli_Chr08</i>       | 3386165                        | (C/A)       |
| 13563       | CakSNP13563    | <i>Kabuli</i>    | <i>Ca_Kabuli_Chr08</i>       | 3386181                        | (C/A)       |
| 13564       | CakSNP13564    | <i>Kabuli</i>    | <i>Ca_Kabuli_Chr08</i>       | 3392929                        | (A/C)       |
| 13565       | CakSNP13565    | <i>Kabuli</i>    | <i>Ca_Kabuli_Chr08</i>       | 3394796                        | (A/C)       |
| 13566       | CakSNP13566    | <i>Kabuli</i>    | <i>Ca_Kabuli_Chr08</i>       | 3394833                        | (T/C)       |
| 13567       | CakSNP13567    | <i>Kabuli</i>    | <i>Ca_Kabuli_Chr08</i>       | 3394931                        | (T/C)       |
| 13568       | CakSNP13568    | <i>Kabuli</i>    | <i>Ca_Kabuli_Chr08</i>       | 3396820                        | (T/C)       |
| 13569       | CakSNP13569    | <i>Kabuli</i>    | <i>Ca_Kabuli_Chr08</i>       | 3438274                        | (A/T)       |
| 13570       | CakSNP13570    | <i>Kabuli</i>    | <i>Ca_Kabuli_Chr08</i>       | 3445568                        | (G/T)       |

| <b>S.N.</b> | <b>SNP IDs</b> | <b>Cultivars</b> | <b>Chromosomes/scaffolds</b> | <b>Physical positions (bp)</b> | <b>SNPs</b> |
|-------------|----------------|------------------|------------------------------|--------------------------------|-------------|
| 13571       | CakSNP13571    | <i>Kabuli</i>    | <i>Ca_Kabuli_Chr08</i>       | 3448194                        | (C/T)       |
| 13572       | CakSNP13572    | <i>Kabuli</i>    | <i>Ca_Kabuli_Chr08</i>       | 3460627                        | (G/A)       |
| 13573       | CakSNP13573    | <i>Kabuli</i>    | <i>Ca_Kabuli_Chr08</i>       | 3499010                        | (G/A)       |
| 13574       | CakSNP13574    | <i>Kabuli</i>    | <i>Ca_Kabuli_Chr08</i>       | 3539690                        | (A/G)       |
| 13575       | CakSNP13575    | <i>Kabuli</i>    | <i>Ca_Kabuli_Chr08</i>       | 3539723                        | (G/C)       |
| 13576       | CakSNP13576    | <i>Kabuli</i>    | <i>Ca_Kabuli_Chr08</i>       | 3539745                        | (T/C)       |
| 13577       | CakSNP13577    | <i>Kabuli</i>    | <i>Ca_Kabuli_Chr08</i>       | 3539851                        | (T/C)       |
| 13578       | CakSNP13578    | <i>Kabuli</i>    | <i>Ca_Kabuli_Chr08</i>       | 3539838                        | (T/G)       |
| 13579       | CakSNP13579    | <i>Kabuli</i>    | <i>Ca_Kabuli_Chr08</i>       | 3539832                        | (T/C)       |
| 13580       | CakSNP13580    | <i>Kabuli</i>    | <i>Ca_Kabuli_Chr08</i>       | 3560271                        | (G/A)       |
| 13581       | CakSNP13581    | <i>Kabuli</i>    | <i>Ca_Kabuli_Chr08</i>       | 3563692                        | (A/C)       |
| 13582       | CakSNP13582    | <i>Kabuli</i>    | <i>Ca_Kabuli_Chr08</i>       | 3563825                        | (G/T)       |
| 13583       | CakSNP13583    | <i>Kabuli</i>    | <i>Ca_Kabuli_Chr08</i>       | 3563824                        | (T/A)       |
| 13584       | CakSNP13584    | <i>Kabuli</i>    | <i>Ca_Kabuli_Chr08</i>       | 3599091                        | (G/C)       |
| 13585       | CakSNP13585    | <i>Kabuli</i>    | <i>Ca_Kabuli_Chr08</i>       | 3601517                        | (T/C)       |
| 13586       | CakSNP13586    | <i>Kabuli</i>    | <i>Ca_Kabuli_Chr08</i>       | 3605513                        | (T/C)       |
| 13587       | CakSNP13587    | <i>Kabuli</i>    | <i>Ca_Kabuli_Chr08</i>       | 3617810                        | (T/C)       |
| 13588       | CakSNP13588    | <i>Kabuli</i>    | <i>Ca_Kabuli_Chr08</i>       | 3617757                        | (G/C)       |
| 13589       | CakSNP13589    | <i>Kabuli</i>    | <i>Ca_Kabuli_Chr08</i>       | 3723085                        | (C/T)       |
| 13590       | CakSNP13590    | <i>Kabuli</i>    | <i>Ca_Kabuli_Chr08</i>       | 3730369                        | (A/C)       |
| 13591       | CakSNP13591    | <i>Kabuli</i>    | <i>Ca_Kabuli_Chr08</i>       | 3775945                        | (G/A)       |
| 13592       | CakSNP13592    | <i>Kabuli</i>    | <i>Ca_Kabuli_Chr08</i>       | 3775960                        | (T/C)       |
| 13593       | CakSNP13593    | <i>Kabuli</i>    | <i>Ca_Kabuli_Chr08</i>       | 3813978                        | (C/T)       |
| 13594       | CakSNP13594    | <i>Kabuli</i>    | <i>Ca_Kabuli_Chr08</i>       | 3829425                        | (C/G)       |
| 13595       | CakSNP13595    | <i>Kabuli</i>    | <i>Ca_Kabuli_Chr08</i>       | 3829576                        | (A/G)       |
| 13596       | CakSNP13596    | <i>Kabuli</i>    | <i>Ca_Kabuli_Chr08</i>       | 3837237                        | (A/G)       |
| 13597       | CakSNP13597    | <i>Kabuli</i>    | <i>Ca_Kabuli_Chr08</i>       | 3837306                        | (G/C)       |
| 13598       | CakSNP13598    | <i>Kabuli</i>    | <i>Ca_Kabuli_Chr08</i>       | 3868511                        | (A/C)       |
| 13599       | CakSNP13599    | <i>Kabuli</i>    | <i>Ca_Kabuli_Chr08</i>       | 3877130                        | (G/T)       |
| 13600       | CakSNP13600    | <i>Kabuli</i>    | <i>Ca_Kabuli_Chr08</i>       | 3877176                        | (T/G)       |
| 13601       | CakSNP13601    | <i>Kabuli</i>    | <i>Ca_Kabuli_Chr08</i>       | 3911930                        | (A/C)       |
| 13602       | CakSNP13602    | <i>Kabuli</i>    | <i>Ca_Kabuli_Chr08</i>       | 3911876                        | (G/C)       |
| 13603       | CakSNP13603    | <i>Kabuli</i>    | <i>Ca_Kabuli_Chr08</i>       | 3951767                        | (C/A)       |
| 13604       | CakSNP13604    | <i>Kabuli</i>    | <i>Ca_Kabuli_Chr08</i>       | 3951768                        | (A/G)       |
| 13605       | CakSNP13605    | <i>Kabuli</i>    | <i>Ca_Kabuli_Chr08</i>       | 3954853                        | (T/A)       |
| 13606       | CakSNP13606    | <i>Kabuli</i>    | <i>Ca_Kabuli_Chr08</i>       | 4042166                        | (A/C)       |
| 13607       | CakSNP13607    | <i>Kabuli</i>    | <i>Ca_Kabuli_Chr08</i>       | 4042233                        | (G/A)       |
| 13608       | CakSNP13608    | <i>Kabuli</i>    | <i>Ca_Kabuli_Chr08</i>       | 4042424                        | (G/A)       |
| 13609       | CakSNP13609    | <i>Kabuli</i>    | <i>Ca_Kabuli_Chr08</i>       | 4052732                        | (C/T)       |

| <b>S.N.</b> | <b>SNP IDs</b> | <b>Cultivars</b> | <b>Chromosomes/scaffolds</b> | <b>Physical positions (bp)</b> | <b>SNPs</b> |
|-------------|----------------|------------------|------------------------------|--------------------------------|-------------|
| 13610       | CakSNP13610    | <i>Kabuli</i>    | <i>Ca_Kabuli_Chr08</i>       | 4052702                        | (C/T)       |
| 13611       | CakSNP13611    | <i>Kabuli</i>    | <i>Ca_Kabuli_Chr08</i>       | 4073528                        | (C/T)       |
| 13612       | CakSNP13612    | <i>Kabuli</i>    | <i>Ca_Kabuli_Chr08</i>       | 4073603                        | (A/G)       |
| 13613       | CakSNP13613    | <i>Kabuli</i>    | <i>Ca_Kabuli_Chr08</i>       | 4074135                        | (T/C)       |
| 13614       | CakSNP13614    | <i>Kabuli</i>    | <i>Ca_Kabuli_Chr08</i>       | 4091946                        | (T/C)       |
| 13615       | CakSNP13615    | <i>Kabuli</i>    | <i>Ca_Kabuli_Chr08</i>       | 4092348                        | (T/A)       |
| 13616       | CakSNP13616    | <i>Kabuli</i>    | <i>Ca_Kabuli_Chr08</i>       | 4092350                        | (G/C)       |
| 13617       | CakSNP13617    | <i>Kabuli</i>    | <i>Ca_Kabuli_Chr08</i>       | 4095131                        | (A/C)       |
| 13618       | CakSNP13618    | <i>Kabuli</i>    | <i>Ca_Kabuli_Chr08</i>       | 4095119                        | (G/A)       |
| 13619       | CakSNP13619    | <i>Kabuli</i>    | <i>Ca_Kabuli_Chr08</i>       | 4106580                        | (T/C)       |
| 13620       | CakSNP13620    | <i>Kabuli</i>    | <i>Ca_Kabuli_Chr08</i>       | 4106583                        | (T/C)       |
| 13621       | CakSNP13621    | <i>Kabuli</i>    | <i>Ca_Kabuli_Chr08</i>       | 4106644                        | (C/T)       |
| 13622       | CakSNP13622    | <i>Kabuli</i>    | <i>Ca_Kabuli_Chr08</i>       | 4172342                        | (A/G)       |
| 13623       | CakSNP13623    | <i>Kabuli</i>    | <i>Ca_Kabuli_Chr08</i>       | 4172368                        | (T/C)       |
| 13624       | CakSNP13624    | <i>Kabuli</i>    | <i>Ca_Kabuli_Chr08</i>       | 4183744                        | (A/G)       |
| 13625       | CakSNP13625    | <i>Kabuli</i>    | <i>Ca_Kabuli_Chr08</i>       | 4183733                        | (G/A)       |
| 13626       | CakSNP13626    | <i>Kabuli</i>    | <i>Ca_Kabuli_Chr08</i>       | 4198214                        | (A/C)       |
| 13627       | CakSNP13627    | <i>Kabuli</i>    | <i>Ca_Kabuli_Chr08</i>       | 4201285                        | (A/G)       |
| 13628       | CakSNP13628    | <i>Kabuli</i>    | <i>Ca_Kabuli_Chr08</i>       | 4237620                        | (T/A)       |
| 13629       | CakSNP13629    | <i>Kabuli</i>    | <i>Ca_Kabuli_Chr08</i>       | 4271620                        | (T/A)       |
| 13630       | CakSNP13630    | <i>Kabuli</i>    | <i>Ca_Kabuli_Chr08</i>       | 4290690                        | (T/A)       |
| 13631       | CakSNP13631    | <i>Kabuli</i>    | <i>Ca_Kabuli_Chr08</i>       | 4322058                        | (A/G)       |
| 13632       | CakSNP13632    | <i>Kabuli</i>    | <i>Ca_Kabuli_Chr08</i>       | 4322202                        | (C/T)       |
| 13633       | CakSNP13633    | <i>Kabuli</i>    | <i>Ca_Kabuli_Chr08</i>       | 4344459                        | (C/A)       |
| 13634       | CakSNP13634    | <i>Kabuli</i>    | <i>Ca_Kabuli_Chr08</i>       | 4346552                        | (A/G)       |
| 13635       | CakSNP13635    | <i>Kabuli</i>    | <i>Ca_Kabuli_Chr08</i>       | 4346749                        | (A/G)       |
| 13636       | CakSNP13636    | <i>Kabuli</i>    | <i>Ca_Kabuli_Chr08</i>       | 4346811                        | (C/T)       |
| 13637       | CakSNP13637    | <i>Kabuli</i>    | <i>Ca_Kabuli_Chr08</i>       | 4346827                        | (A/C)       |
| 13638       | CakSNP13638    | <i>Kabuli</i>    | <i>Ca_Kabuli_Chr08</i>       | 4347535                        | (A/C)       |
| 13639       | CakSNP13639    | <i>Kabuli</i>    | <i>Ca_Kabuli_Chr08</i>       | 4351751                        | (G/A)       |
| 13640       | CakSNP13640    | <i>Kabuli</i>    | <i>Ca_Kabuli_Chr08</i>       | 4353397                        | (A/C)       |
| 13641       | CakSNP13641    | <i>Kabuli</i>    | <i>Ca_Kabuli_Chr08</i>       | 4355388                        | (G/T)       |
| 13642       | CakSNP13642    | <i>Kabuli</i>    | <i>Ca_Kabuli_Chr08</i>       | 4355531                        | (A/C)       |
| 13643       | CakSNP13643    | <i>Kabuli</i>    | <i>Ca_Kabuli_Chr08</i>       | 4368163                        | (T/C)       |
| 13644       | CakSNP13644    | <i>Kabuli</i>    | <i>Ca_Kabuli_Chr08</i>       | 4368184                        | (T/C)       |
| 13645       | CakSNP13645    | <i>Kabuli</i>    | <i>Ca_Kabuli_Chr08</i>       | 4368213                        | (T/C)       |
| 13646       | CakSNP13646    | <i>Kabuli</i>    | <i>Ca_Kabuli_Chr08</i>       | 4368403                        | (G/A)       |
| 13647       | CakSNP13647    | <i>Kabuli</i>    | <i>Ca_Kabuli_Chr08</i>       | 4368463                        | (A/G)       |
| 13648       | CakSNP13648    | <i>Kabuli</i>    | <i>Ca_Kabuli_Chr08</i>       | 4392707                        | (T/C)       |

| <b>S.N.</b> | <b>SNP IDs</b> | <b>Cultivars</b> | <b>Chromosomes/scaffolds</b> | <b>Physical positions (bp)</b> | <b>SNPs</b> |
|-------------|----------------|------------------|------------------------------|--------------------------------|-------------|
| 13649       | CakSNP13649    | <i>Kabuli</i>    | <i>Ca_Kabuli_Chr08</i>       | 4392767                        | (T/G)       |
| 13650       | CakSNP13650    | <i>Kabuli</i>    | <i>Ca_Kabuli_Chr08</i>       | 4392818                        | (C/A)       |
| 13651       | CakSNP13651    | <i>Kabuli</i>    | <i>Ca_Kabuli_Chr08</i>       | 4406956                        | (C/G)       |
| 13652       | CakSNP13652    | <i>Kabuli</i>    | <i>Ca_Kabuli_Chr08</i>       | 4421609                        | (A/G)       |
| 13653       | CakSNP13653    | <i>Kabuli</i>    | <i>Ca_Kabuli_Chr08</i>       | 4421629                        | (T/A)       |
| 13654       | CakSNP13654    | <i>Kabuli</i>    | <i>Ca_Kabuli_Chr08</i>       | 4472423                        | (A/T)       |
| 13655       | CakSNP13655    | <i>Kabuli</i>    | <i>Ca_Kabuli_Chr08</i>       | 4483130                        | (T/C)       |
| 13656       | CakSNP13656    | <i>Kabuli</i>    | <i>Ca_Kabuli_Chr08</i>       | 4483274                        | (T/C)       |
| 13657       | CakSNP13657    | <i>Kabuli</i>    | <i>Ca_Kabuli_Chr08</i>       | 4484606                        | (T/A)       |
| 13658       | CakSNP13658    | <i>Kabuli</i>    | <i>Ca_Kabuli_Chr08</i>       | 4507729                        | (G/T)       |
| 13659       | CakSNP13659    | <i>Kabuli</i>    | <i>Ca_Kabuli_Chr08</i>       | 4510845                        | (C/T)       |
| 13660       | CakSNP13660    | <i>Kabuli</i>    | <i>Ca_Kabuli_Chr08</i>       | 4510810                        | (A/G)       |
| 13661       | CakSNP13661    | <i>Kabuli</i>    | <i>Ca_Kabuli_Chr08</i>       | 4512311                        | (T/C)       |
| 13662       | CakSNP13662    | <i>Kabuli</i>    | <i>Ca_Kabuli_Chr08</i>       | 4512436                        | (G/A)       |
| 13663       | CakSNP13663    | <i>Kabuli</i>    | <i>Ca_Kabuli_Chr08</i>       | 4512492                        | (T/G)       |
| 13664       | CakSNP13664    | <i>Kabuli</i>    | <i>Ca_Kabuli_Chr08</i>       | 4524914                        | (C/T)       |
| 13665       | CakSNP13665    | <i>Kabuli</i>    | <i>Ca_Kabuli_Chr08</i>       | 4557334                        | (A/G)       |
| 13666       | CakSNP13666    | <i>Kabuli</i>    | <i>Ca_Kabuli_Chr08</i>       | 4557328                        | (T/C)       |
| 13667       | CakSNP13667    | <i>Kabuli</i>    | <i>Ca_Kabuli_Chr08</i>       | 4557401                        | (A/C)       |
| 13668       | CakSNP13668    | <i>Kabuli</i>    | <i>Ca_Kabuli_Chr08</i>       | 4557407                        | (A/C)       |
| 13669       | CakSNP13669    | <i>Kabuli</i>    | <i>Ca_Kabuli_Chr08</i>       | 4557440                        | (A/G)       |
| 13670       | CakSNP13670    | <i>Kabuli</i>    | <i>Ca_Kabuli_Chr08</i>       | 4557488                        | (C/T)       |
| 13671       | CakSNP13671    | <i>Kabuli</i>    | <i>Ca_Kabuli_Chr08</i>       | 4580363                        | (C/A)       |
| 13672       | CakSNP13672    | <i>Kabuli</i>    | <i>Ca_Kabuli_Chr08</i>       | 4588869                        | (T/C)       |
| 13673       | CakSNP13673    | <i>Kabuli</i>    | <i>Ca_Kabuli_Chr08</i>       | 4588915                        | (A/C)       |
| 13674       | CakSNP13674    | <i>Kabuli</i>    | <i>Ca_Kabuli_Chr08</i>       | 4611094                        | (C/T)       |
| 13675       | CakSNP13675    | <i>Kabuli</i>    | <i>Ca_Kabuli_Chr08</i>       | 4658502                        | (A/G)       |
| 13676       | CakSNP13676    | <i>Kabuli</i>    | <i>Ca_Kabuli_Chr08</i>       | 4714566                        | (G/A)       |
| 13677       | CakSNP13677    | <i>Kabuli</i>    | <i>Ca_Kabuli_Chr08</i>       | 4744388                        | (C/T)       |
| 13678       | CakSNP13678    | <i>Kabuli</i>    | <i>Ca_Kabuli_Chr08</i>       | 4767567                        | (A/C)       |
| 13679       | CakSNP13679    | <i>Kabuli</i>    | <i>Ca_Kabuli_Chr08</i>       | 4767586                        | (C/G)       |
| 13680       | CakSNP13680    | <i>Kabuli</i>    | <i>Ca_Kabuli_Chr08</i>       | 4773205                        | (A/C)       |
| 13681       | CakSNP13681    | <i>Kabuli</i>    | <i>Ca_Kabuli_Chr08</i>       | 4810954                        | (A/C)       |
| 13682       | CakSNP13682    | <i>Kabuli</i>    | <i>Ca_Kabuli_Chr08</i>       | 4810968                        | (G/A)       |
| 13683       | CakSNP13683    | <i>Kabuli</i>    | <i>Ca_Kabuli_Chr08</i>       | 4810986                        | (A/C)       |
| 13684       | CakSNP13684    | <i>Kabuli</i>    | <i>Ca_Kabuli_Chr08</i>       | 4858262                        | (C/A)       |
| 13685       | CakSNP13685    | <i>Kabuli</i>    | <i>Ca_Kabuli_Chr08</i>       | 4899964                        | (T/G)       |
| 13686       | CakSNP13686    | <i>Kabuli</i>    | <i>Ca_Kabuli_Chr08</i>       | 4899983                        | (G/A)       |
| 13687       | CakSNP13687    | <i>Kabuli</i>    | <i>Ca_Kabuli_Chr08</i>       | 4980949                        | (A/T)       |



| <b>S.N.</b> | <b>SNP IDs</b> | <b>Cultivars</b> | <b>Chromosomes/scaffolds</b> | <b>Physical positions (bp)</b> | <b>SNPs</b> |
|-------------|----------------|------------------|------------------------------|--------------------------------|-------------|
| 13688       | CakSNP13688    | <i>Kabuli</i>    | <i>Ca_Kabuli_Chr08</i>       | 4980916                        | (C/T)       |
| 13689       | CakSNP13689    | <i>Kabuli</i>    | <i>Ca_Kabuli_Chr08</i>       | 5044456                        | (T/C)       |
| 13690       | CakSNP13690    | <i>Kabuli</i>    | <i>Ca_Kabuli_Chr08</i>       | 5044423                        | (T/A)       |
| 13691       | CakSNP13691    | <i>Kabuli</i>    | <i>Ca_Kabuli_Chr08</i>       | 5096194                        | (T/G)       |
| 13692       | CakSNP13692    | <i>Kabuli</i>    | <i>Ca_Kabuli_Chr08</i>       | 5115451                        | (C/G)       |
| 13693       | CakSNP13693    | <i>Kabuli</i>    | <i>Ca_Kabuli_Chr08</i>       | 5115498                        | (A/T)       |
| 13694       | CakSNP13694    | <i>Kabuli</i>    | <i>Ca_Kabuli_Chr08</i>       | 5115512                        | (T/G)       |
| 13695       | CakSNP13695    | <i>Kabuli</i>    | <i>Ca_Kabuli_Chr08</i>       | 5115522                        | (G/C)       |
| 13696       | CakSNP13696    | <i>Kabuli</i>    | <i>Ca_Kabuli_Chr08</i>       | 5134706                        | (A/C)       |
| 13697       | CakSNP13697    | <i>Kabuli</i>    | <i>Ca_Kabuli_Chr08</i>       | 5184227                        | (C/G)       |
| 13698       | CakSNP13698    | <i>Kabuli</i>    | <i>Ca_Kabuli_Chr08</i>       | 5184276                        | (G/A)       |
| 13699       | CakSNP13699    | <i>Kabuli</i>    | <i>Ca_Kabuli_Chr08</i>       | 5197004                        | (G/T)       |
| 13700       | CakSNP13700    | <i>Kabuli</i>    | <i>Ca_Kabuli_Chr08</i>       | 5197254                        | (G/A)       |
| 13701       | CakSNP13701    | <i>Kabuli</i>    | <i>Ca_Kabuli_Chr08</i>       | 5204956                        | (A/G)       |
| 13702       | CakSNP13702    | <i>Kabuli</i>    | <i>Ca_Kabuli_Chr08</i>       | 5313792                        | (T/C)       |
| 13703       | CakSNP13703    | <i>Kabuli</i>    | <i>Ca_Kabuli_Chr08</i>       | 5313782                        | (T/G)       |
| 13704       | CakSNP13704    | <i>Kabuli</i>    | <i>Ca_Kabuli_Chr08</i>       | 5313774                        | (C/G)       |
| 13705       | CakSNP13705    | <i>Kabuli</i>    | <i>Ca_Kabuli_Chr08</i>       | 5313770                        | (A/T)       |
| 13706       | CakSNP13706    | <i>Kabuli</i>    | <i>Ca_Kabuli_Chr08</i>       | 5379556                        | (G/A)       |
| 13707       | CakSNP13707    | <i>Kabuli</i>    | <i>Ca_Kabuli_Chr08</i>       | 5390415                        | (C/T)       |
| 13708       | CakSNP13708    | <i>Kabuli</i>    | <i>Ca_Kabuli_Chr08</i>       | 5390602                        | (T/C)       |
| 13709       | CakSNP13709    | <i>Kabuli</i>    | <i>Ca_Kabuli_Chr08</i>       | 5399503                        | (G/A)       |
| 13710       | CakSNP13710    | <i>Kabuli</i>    | <i>Ca_Kabuli_Chr08</i>       | 5400188                        | (A/G)       |
| 13711       | CakSNP13711    | <i>Kabuli</i>    | <i>Ca_Kabuli_Chr08</i>       | 5412501                        | (A/G)       |
| 13712       | CakSNP13712    | <i>Kabuli</i>    | <i>Ca_Kabuli_Chr08</i>       | 5412489                        | (T/C)       |
| 13713       | CakSNP13713    | <i>Kabuli</i>    | <i>Ca_Kabuli_Chr08</i>       | 5434223                        | (C/T)       |
| 13714       | CakSNP13714    | <i>Kabuli</i>    | <i>Ca_Kabuli_Chr08</i>       | 5434225                        | (G/C)       |
| 13715       | CakSNP13715    | <i>Kabuli</i>    | <i>Ca_Kabuli_Chr08</i>       | 5434232                        | (A/G)       |
| 13716       | CakSNP13716    | <i>Kabuli</i>    | <i>Ca_Kabuli_Chr08</i>       | 5434238                        | (T/G)       |
| 13717       | CakSNP13717    | <i>Kabuli</i>    | <i>Ca_Kabuli_Chr08</i>       | 5434242                        | (T/A)       |
| 13718       | CakSNP13718    | <i>Kabuli</i>    | <i>Ca_Kabuli_Chr08</i>       | 5487769                        | (G/A)       |
| 13719       | CakSNP13719    | <i>Kabuli</i>    | <i>Ca_Kabuli_Chr08</i>       | 5487830                        | (G/A)       |
| 13720       | CakSNP13720    | <i>Kabuli</i>    | <i>Ca_Kabuli_Chr08</i>       | 5536418                        | (T/G)       |
| 13721       | CakSNP13721    | <i>Kabuli</i>    | <i>Ca_Kabuli_Chr08</i>       | 5538696                        | (A/C)       |
| 13722       | CakSNP13722    | <i>Kabuli</i>    | <i>Ca_Kabuli_Chr08</i>       | 5538695                        | (T/C)       |
| 13723       | CakSNP13723    | <i>Kabuli</i>    | <i>Ca_Kabuli_Chr08</i>       | 5538683                        | (T/C)       |
| 13724       | CakSNP13724    | <i>Kabuli</i>    | <i>Ca_Kabuli_Chr08</i>       | 5539044                        | (C/T)       |
| 13725       | CakSNP13725    | <i>Kabuli</i>    | <i>Ca_Kabuli_Chr08</i>       | 5586106                        | (G/A)       |
| 13726       | CakSNP13726    | <i>Kabuli</i>    | <i>Ca_Kabuli_Chr08</i>       | 5591654                        | (T/C)       |

| <b>S.N.</b> | <b>SNP IDs</b> | <b>Cultivars</b> | <b>Chromosomes/scaffolds</b> | <b>Physical positions (bp)</b> | <b>SNPs</b> |
|-------------|----------------|------------------|------------------------------|--------------------------------|-------------|
| 13727       | CakSNP13727    | <i>Kabuli</i>    | <i>Ca_Kabuli_Chr08</i>       | 5591788                        | (G/C)       |
| 13728       | CakSNP13728    | <i>Kabuli</i>    | <i>Ca_Kabuli_Chr08</i>       | 5650080                        | (C/G)       |
| 13729       | CakSNP13729    | <i>Kabuli</i>    | <i>Ca_Kabuli_Chr08</i>       | 5712245                        | (T/A)       |
| 13730       | CakSNP13730    | <i>Kabuli</i>    | <i>Ca_Kabuli_Chr08</i>       | 5811179                        | (G/C)       |
| 13731       | CakSNP13731    | <i>Kabuli</i>    | <i>Ca_Kabuli_Chr08</i>       | 5819008                        | (G/A)       |
| 13732       | CakSNP13732    | <i>Kabuli</i>    | <i>Ca_Kabuli_Chr08</i>       | 5840141                        | (G/A)       |
| 13733       | CakSNP13733    | <i>Kabuli</i>    | <i>Ca_Kabuli_Chr08</i>       | 5870455                        | (A/G)       |
| 13734       | CakSNP13734    | <i>Kabuli</i>    | <i>Ca_Kabuli_Chr08</i>       | 5870664                        | (T/C)       |
| 13735       | CakSNP13735    | <i>Kabuli</i>    | <i>Ca_Kabuli_Chr08</i>       | 5870749                        | (C/T)       |
| 13736       | CakSNP13736    | <i>Kabuli</i>    | <i>Ca_Kabuli_Chr08</i>       | 5871358                        | (G/C)       |
| 13737       | CakSNP13737    | <i>Kabuli</i>    | <i>Ca_Kabuli_Chr08</i>       | 5871361                        | (T/G)       |
| 13738       | CakSNP13738    | <i>Kabuli</i>    | <i>Ca_Kabuli_Chr08</i>       | 5871364                        | (T/C)       |
| 13739       | CakSNP13739    | <i>Kabuli</i>    | <i>Ca_Kabuli_Chr08</i>       | 5871367                        | (T/A)       |
| 13740       | CakSNP13740    | <i>Kabuli</i>    | <i>Ca_Kabuli_Chr08</i>       | 5871421                        | (A/G)       |
| 13741       | CakSNP13741    | <i>Kabuli</i>    | <i>Ca_Kabuli_Chr08</i>       | 5910629                        | (C/G)       |
| 13742       | CakSNP13742    | <i>Kabuli</i>    | <i>Ca_Kabuli_Chr08</i>       | 5927870                        | (G/T)       |
| 13743       | CakSNP13743    | <i>Kabuli</i>    | <i>Ca_Kabuli_Chr08</i>       | 5935435                        | (A/C)       |
| 13744       | CakSNP13744    | <i>Kabuli</i>    | <i>Ca_Kabuli_Chr08</i>       | 5963855                        | (T/A)       |
| 13745       | CakSNP13745    | <i>Kabuli</i>    | <i>Ca_Kabuli_Chr08</i>       | 5992761                        | (A/G)       |
| 13746       | CakSNP13746    | <i>Kabuli</i>    | <i>Ca_Kabuli_Chr08</i>       | 6084594                        | (G/A)       |
| 13747       | CakSNP13747    | <i>Kabuli</i>    | <i>Ca_Kabuli_Chr08</i>       | 6084591                        | (C/T)       |
| 13748       | CakSNP13748    | <i>Kabuli</i>    | <i>Ca_Kabuli_Chr08</i>       | 6115961                        | (T/G)       |
| 13749       | CakSNP13749    | <i>Kabuli</i>    | <i>Ca_Kabuli_Chr08</i>       | 6115965                        | (T/C)       |
| 13750       | CakSNP13750    | <i>Kabuli</i>    | <i>Ca_Kabuli_Chr08</i>       | 6116096                        | (C/T)       |
| 13751       | CakSNP13751    | <i>Kabuli</i>    | <i>Ca_Kabuli_Chr08</i>       | 6116097                        | (C/A)       |
| 13752       | CakSNP13752    | <i>Kabuli</i>    | <i>Ca_Kabuli_Chr08</i>       | 6116101                        | (G/A)       |
| 13753       | CakSNP13753    | <i>Kabuli</i>    | <i>Ca_Kabuli_Chr08</i>       | 6145326                        | (G/A)       |
| 13754       | CakSNP13754    | <i>Kabuli</i>    | <i>Ca_Kabuli_Chr08</i>       | 6149097                        | (A/C)       |
| 13755       | CakSNP13755    | <i>Kabuli</i>    | <i>Ca_Kabuli_Chr08</i>       | 6192944                        | (T/G)       |
| 13756       | CakSNP13756    | <i>Kabuli</i>    | <i>Ca_Kabuli_Chr08</i>       | 6192986                        | (C/T)       |
| 13757       | CakSNP13757    | <i>Kabuli</i>    | <i>Ca_Kabuli_Chr08</i>       | 6193078                        | (G/A)       |
| 13758       | CakSNP13758    | <i>Kabuli</i>    | <i>Ca_Kabuli_Chr08</i>       | 6218250                        | (G/A)       |
| 13759       | CakSNP13759    | <i>Kabuli</i>    | <i>Ca_Kabuli_Chr08</i>       | 6218275                        | (C/T)       |
| 13760       | CakSNP13760    | <i>Kabuli</i>    | <i>Ca_Kabuli_Chr08</i>       | 6218298                        | (A/G)       |
| 13761       | CakSNP13761    | <i>Kabuli</i>    | <i>Ca_Kabuli_Chr08</i>       | 6218299                        | (T/A)       |
| 13762       | CakSNP13762    | <i>Kabuli</i>    | <i>Ca_Kabuli_Chr08</i>       | 6266432                        | (A/G)       |
| 13763       | CakSNP13763    | <i>Kabuli</i>    | <i>Ca_Kabuli_Chr08</i>       | 6372236                        | (A/T)       |
| 13764       | CakSNP13764    | <i>Kabuli</i>    | <i>Ca_Kabuli_Chr08</i>       | 6372230                        | (G/A)       |
| 13765       | CakSNP13765    | <i>Kabuli</i>    | <i>Ca_Kabuli_Chr08</i>       | 6372223                        | (G/A)       |

| <b>S.N.</b> | <b>SNP IDs</b> | <b>Cultivars</b> | <b>Chromosomes/scaffolds</b> | <b>Physical positions (bp)</b> | <b>SNPs</b> |
|-------------|----------------|------------------|------------------------------|--------------------------------|-------------|
| 13766       | CakSNP13766    | Kabuli           | Ca_Kabuli_Chr08              | 6374794                        | (C/A)       |
| 13767       | CakSNP13767    | Kabuli           | Ca_Kabuli_Chr08              | 6437758                        | (T/G)       |
| 13768       | CakSNP13768    | Kabuli           | Ca_Kabuli_Chr08              | 6503723                        | (T/C)       |
| 13769       | CakSNP13769    | Kabuli           | Ca_Kabuli_Chr08              | 6525633                        | (A/T)       |
| 13770       | CakSNP13770    | Kabuli           | Ca_Kabuli_Chr08              | 6526612                        | (T/C)       |
| 13771       | CakSNP13771    | Kabuli           | Ca_Kabuli_Chr08              | 6544248                        | (G/T)       |
| 13772       | CakSNP13772    | Kabuli           | Ca_Kabuli_Chr08              | 6544278                        | (C/A)       |
| 13773       | CakSNP13773    | Kabuli           | Ca_Kabuli_Chr08              | 6624006                        | (C/T)       |
| 13774       | CakSNP13774    | Kabuli           | Ca_Kabuli_Chr08              | 6630663                        | (C/T)       |
| 13775       | CakSNP13775    | Kabuli           | Ca_Kabuli_Chr08              | 6630661                        | (T/C)       |
| 13776       | CakSNP13776    | Kabuli           | Ca_Kabuli_Chr08              | 6664509                        | (T/A)       |
| 13777       | CakSNP13777    | Kabuli           | Ca_Kabuli_Chr08              | 6673855                        | (C/T)       |
| 13778       | CakSNP13778    | Kabuli           | Ca_Kabuli_Chr08              | 6673891                        | (A/G)       |
| 13779       | CakSNP13779    | Kabuli           | Ca_Kabuli_Chr08              | 6674024                        | (G/A)       |
| 13780       | CakSNP13780    | Kabuli           | Ca_Kabuli_Chr08              | 6673956                        | (G/A)       |
| 13781       | CakSNP13781    | Kabuli           | Ca_Kabuli_Chr08              | 6708869                        | (G/T)       |
| 13782       | CakSNP13782    | Kabuli           | Ca_Kabuli_Chr08              | 6708945                        | (A/G)       |
| 13783       | CakSNP13783    | Kabuli           | Ca_Kabuli_Chr08              | 6747091                        | (T/C)       |
| 13784       | CakSNP13784    | Kabuli           | Ca_Kabuli_Chr08              | 6747995                        | (A/G)       |
| 13785       | CakSNP13785    | Kabuli           | Ca_Kabuli_Chr08              | 6748136                        | (C/T)       |
| 13786       | CakSNP13786    | Kabuli           | Ca_Kabuli_Chr08              | 6748294                        | (T/C)       |
| 13787       | CakSNP13787    | Kabuli           | Ca_Kabuli_Chr08              | 6780592                        | (T/G)       |
| 13788       | CakSNP13788    | Kabuli           | Ca_Kabuli_Chr08              | 6940139                        | (A/G)       |
| 13789       | CakSNP13789    | Kabuli           | Ca_Kabuli_Chr08              | 6942651                        | (G/T)       |
| 13790       | CakSNP13790    | Kabuli           | Ca_Kabuli_Chr08              | 6943710                        | (A/G)       |
| 13791       | CakSNP13791    | Kabuli           | Ca_Kabuli_Chr08              | 6968036                        | (A/G)       |
| 13792       | CakSNP13792    | Kabuli           | Ca_Kabuli_Chr08              | 6986090                        | (G/A)       |
| 13793       | CakSNP13793    | Kabuli           | Ca_Kabuli_Chr08              | 6986130                        | (A/G)       |
| 13794       | CakSNP13794    | Kabuli           | Ca_Kabuli_Chr08              | 6987609                        | (G/T)       |
| 13795       | CakSNP13795    | Kabuli           | Ca_Kabuli_Chr08              | 6987615                        | (A/C)       |
| 13796       | CakSNP13796    | Kabuli           | Ca_Kabuli_Chr08              | 6989342                        | (G/T)       |
| 13797       | CakSNP13797    | Kabuli           | Ca_Kabuli_Chr08              | 6989433                        | (A/G)       |
| 13798       | CakSNP13798    | Kabuli           | Ca_Kabuli_Chr08              | 7013049                        | (G/A)       |
| 13799       | CakSNP13799    | Kabuli           | Ca_Kabuli_Chr08              | 7037715                        | (G/A)       |
| 13800       | CakSNP13800    | Kabuli           | Ca_Kabuli_Chr08              | 7041901                        | (A/C)       |
| 13801       | CakSNP13801    | Kabuli           | Ca_Kabuli_Chr08              | 7047509                        | (T/G)       |
| 13802       | CakSNP13802    | Kabuli           | Ca_Kabuli_Chr08              | 7047469                        | (T/A)       |
| 13803       | CakSNP13803    | Kabuli           | Ca_Kabuli_Chr08              | 7099455                        | (C/T)       |
| 13804       | CakSNP13804    | Kabuli           | Ca_Kabuli_Chr08              | 7099569                        | (T/C)       |

| <b>S.N.</b> | <b>SNP IDs</b> | <b>Cultivars</b> | <b>Chromosomes/scaffolds</b> | <b>Physical positions (bp)</b> | <b>SNPs</b> |
|-------------|----------------|------------------|------------------------------|--------------------------------|-------------|
| 13805       | CakSNP13805    | <i>Kabuli</i>    | <i>Ca_Kabuli_Chr08</i>       | 7099530                        | (C/A)       |
| 13806       | CakSNP13806    | <i>Kabuli</i>    | <i>Ca_Kabuli_Chr08</i>       | 7099756                        | (A/G)       |
| 13807       | CakSNP13807    | <i>Kabuli</i>    | <i>Ca_Kabuli_Chr08</i>       | 7162826                        | (T/G)       |
| 13808       | CakSNP13808    | <i>Kabuli</i>    | <i>Ca_Kabuli_Chr08</i>       | 7162976                        | (A/G)       |
| 13809       | CakSNP13809    | <i>Kabuli</i>    | <i>Ca_Kabuli_Chr08</i>       | 7174066                        | (C/T)       |
| 13810       | CakSNP13810    | <i>Kabuli</i>    | <i>Ca_Kabuli_Chr08</i>       | 7175086                        | (A/C)       |
| 13811       | CakSNP13811    | <i>Kabuli</i>    | <i>Ca_Kabuli_Chr08</i>       | 7191825                        | (A/G)       |
| 13812       | CakSNP13812    | <i>Kabuli</i>    | <i>Ca_Kabuli_Chr08</i>       | 7193946                        | (C/T)       |
| 13813       | CakSNP13813    | <i>Kabuli</i>    | <i>Ca_Kabuli_Chr08</i>       | 7193960                        | (A/T)       |
| 13814       | CakSNP13814    | <i>Kabuli</i>    | <i>Ca_Kabuli_Chr08</i>       | 7295151                        | (T/C)       |
| 13815       | CakSNP13815    | <i>Kabuli</i>    | <i>Ca_Kabuli_Chr08</i>       | 7295206                        | (A/G)       |
| 13816       | CakSNP13816    | <i>Kabuli</i>    | <i>Ca_Kabuli_Chr08</i>       | 7295177                        | (G/T)       |
| 13817       | CakSNP13817    | <i>Kabuli</i>    | <i>Ca_Kabuli_Chr08</i>       | 7307737                        | (G/T)       |
| 13818       | CakSNP13818    | <i>Kabuli</i>    | <i>Ca_Kabuli_Chr08</i>       | 7307787                        | (A/T)       |
| 13819       | CakSNP13819    | <i>Kabuli</i>    | <i>Ca_Kabuli_Chr08</i>       | 7357621                        | (A/G)       |
| 13820       | CakSNP13820    | <i>Kabuli</i>    | <i>Ca_Kabuli_Chr08</i>       | 7357583                        | (T/C)       |
| 13821       | CakSNP13821    | <i>Kabuli</i>    | <i>Ca_Kabuli_Chr08</i>       | 7503013                        | (T/A)       |
| 13822       | CakSNP13822    | <i>Kabuli</i>    | <i>Ca_Kabuli_Chr08</i>       | 7503010                        | (T/C)       |
| 13823       | CakSNP13823    | <i>Kabuli</i>    | <i>Ca_Kabuli_Chr08</i>       | 7506004                        | (A/G)       |
| 13824       | CakSNP13824    | <i>Kabuli</i>    | <i>Ca_Kabuli_Chr08</i>       | 7519758                        | (C/A)       |
| 13825       | CakSNP13825    | <i>Kabuli</i>    | <i>Ca_Kabuli_Chr08</i>       | 7519815                        | (G/A)       |
| 13826       | CakSNP13826    | <i>Kabuli</i>    | <i>Ca_Kabuli_Chr08</i>       | 7526956                        | (A/G)       |
| 13827       | CakSNP13827    | <i>Kabuli</i>    | <i>Ca_Kabuli_Chr08</i>       | 7563385                        | (C/G)       |
| 13828       | CakSNP13828    | <i>Kabuli</i>    | <i>Ca_Kabuli_Chr08</i>       | 7563370                        | (T/C)       |
| 13829       | CakSNP13829    | <i>Kabuli</i>    | <i>Ca_Kabuli_Chr08</i>       | 7563373                        | (T/A)       |
| 13830       | CakSNP13830    | <i>Kabuli</i>    | <i>Ca_Kabuli_Chr08</i>       | 7566548                        | (T/C)       |
| 13831       | CakSNP13831    | <i>Kabuli</i>    | <i>Ca_Kabuli_Chr08</i>       | 7614202                        | (A/C)       |
| 13832       | CakSNP13832    | <i>Kabuli</i>    | <i>Ca_Kabuli_Chr08</i>       | 7628690                        | (T/A)       |
| 13833       | CakSNP13833    | <i>Kabuli</i>    | <i>Ca_Kabuli_Chr08</i>       | 7665291                        | (T/C)       |
| 13834       | CakSNP13834    | <i>Kabuli</i>    | <i>Ca_Kabuli_Chr08</i>       | 7665383                        | (G/T)       |
| 13835       | CakSNP13835    | <i>Kabuli</i>    | <i>Ca_Kabuli_Chr08</i>       | 7694747                        | (A/G)       |
| 13836       | CakSNP13836    | <i>Kabuli</i>    | <i>Ca_Kabuli_Chr08</i>       | 7695990                        | (A/T)       |
| 13837       | CakSNP13837    | <i>Kabuli</i>    | <i>Ca_Kabuli_Chr08</i>       | 7695989                        | (T/A)       |
| 13838       | CakSNP13838    | <i>Kabuli</i>    | <i>Ca_Kabuli_Chr08</i>       | 7697886                        | (G/C)       |
| 13839       | CakSNP13839    | <i>Kabuli</i>    | <i>Ca_Kabuli_Chr08</i>       | 7726921                        | (G/A)       |
| 13840       | CakSNP13840    | <i>Kabuli</i>    | <i>Ca_Kabuli_Chr08</i>       | 7726894                        | (G/T)       |
| 13841       | CakSNP13841    | <i>Kabuli</i>    | <i>Ca_Kabuli_Chr08</i>       | 7726879                        | (A/G)       |
| 13842       | CakSNP13842    | <i>Kabuli</i>    | <i>Ca_Kabuli_Chr08</i>       | 7728085                        | (T/G)       |
| 13843       | CakSNP13843    | <i>Kabuli</i>    | <i>Ca_Kabuli_Chr08</i>       | 7728076                        | (T/C)       |

| <b>S.N.</b> | <b>SNP IDs</b> | <b>Cultivars</b> | <b>Chromosomes/scaffolds</b> | <b>Physical positions (bp)</b> | <b>SNPs</b> |
|-------------|----------------|------------------|------------------------------|--------------------------------|-------------|
| 13844       | CakSNP13844    | <i>Kabuli</i>    | <i>Ca_Kabuli_Chr08</i>       | 7729693                        | (T/C)       |
| 13845       | CakSNP13845    | <i>Kabuli</i>    | <i>Ca_Kabuli_Chr08</i>       | 7733508                        | (C/T)       |
| 13846       | CakSNP13846    | <i>Kabuli</i>    | <i>Ca_Kabuli_Chr08</i>       | 7733573                        | (A/C)       |
| 13847       | CakSNP13847    | <i>Kabuli</i>    | <i>Ca_Kabuli_Chr08</i>       | 7733574                        | (G/A)       |
| 13848       | CakSNP13848    | <i>Kabuli</i>    | <i>Ca_Kabuli_Chr08</i>       | 7733670                        | (C/T)       |
| 13849       | CakSNP13849    | <i>Kabuli</i>    | <i>Ca_Kabuli_Chr08</i>       | 7733647                        | (G/T)       |
| 13850       | CakSNP13850    | <i>Kabuli</i>    | <i>Ca_Kabuli_Chr08</i>       | 7776466                        | (G/A)       |
| 13851       | CakSNP13851    | <i>Kabuli</i>    | <i>Ca_Kabuli_Chr08</i>       | 7776592                        | (T/C)       |
| 13852       | CakSNP13852    | <i>Kabuli</i>    | <i>Ca_Kabuli_Chr08</i>       | 7776897                        | (A/T)       |
| 13853       | CakSNP13853    | <i>Kabuli</i>    | <i>Ca_Kabuli_Chr08</i>       | 7776934                        | (G/T)       |
| 13854       | CakSNP13854    | <i>Kabuli</i>    | <i>Ca_Kabuli_Chr08</i>       | 7776970                        | (T/G)       |
| 13855       | CakSNP13855    | <i>Kabuli</i>    | <i>Ca_Kabuli_Chr08</i>       | 7777023                        | (G/A)       |
| 13856       | CakSNP13856    | <i>Kabuli</i>    | <i>Ca_Kabuli_Chr08</i>       | 7807065                        | (T/C)       |
| 13857       | CakSNP13857    | <i>Kabuli</i>    | <i>Ca_Kabuli_Chr08</i>       | 7978269                        | (C/T)       |
| 13858       | CakSNP13858    | <i>Kabuli</i>    | <i>Ca_Kabuli_Chr08</i>       | 8029283                        | (T/A)       |
| 13859       | CakSNP13859    | <i>Kabuli</i>    | <i>Ca_Kabuli_Chr08</i>       | 8039078                        | (A/T)       |
| 13860       | CakSNP13860    | <i>Kabuli</i>    | <i>Ca_Kabuli_Chr08</i>       | 8059732                        | (A/G)       |
| 13861       | CakSNP13861    | <i>Kabuli</i>    | <i>Ca_Kabuli_Chr08</i>       | 8066006                        | (C/A)       |
| 13862       | CakSNP13862    | <i>Kabuli</i>    | <i>Ca_Kabuli_Chr08</i>       | 8066005                        | (A/G)       |
| 13863       | CakSNP13863    | <i>Kabuli</i>    | <i>Ca_Kabuli_Chr08</i>       | 8104804                        | (G/T)       |
| 13864       | CakSNP13864    | <i>Kabuli</i>    | <i>Ca_Kabuli_Chr08</i>       | 8104801                        | (T/C)       |
| 13865       | CakSNP13865    | <i>Kabuli</i>    | <i>Ca_Kabuli_Chr08</i>       | 8104884                        | (T/A)       |
| 13866       | CakSNP13866    | <i>Kabuli</i>    | <i>Ca_Kabuli_Chr08</i>       | 8104892                        | (C/T)       |
| 13867       | CakSNP13867    | <i>Kabuli</i>    | <i>Ca_Kabuli_Chr08</i>       | 8106804                        | (A/G)       |
| 13868       | CakSNP13868    | <i>Kabuli</i>    | <i>Ca_Kabuli_Chr08</i>       | 8106851                        | (G/A)       |
| 13869       | CakSNP13869    | <i>Kabuli</i>    | <i>Ca_Kabuli_Chr08</i>       | 8114316                        | (A/C)       |
| 13870       | CakSNP13870    | <i>Kabuli</i>    | <i>Ca_Kabuli_Chr08</i>       | 8194206                        | (C/T)       |
| 13871       | CakSNP13871    | <i>Kabuli</i>    | <i>Ca_Kabuli_Chr08</i>       | 8194232                        | (C/A)       |
| 13872       | CakSNP13872    | <i>Kabuli</i>    | <i>Ca_Kabuli_Chr08</i>       | 8194234                        | (C/A)       |
| 13873       | CakSNP13873    | <i>Kabuli</i>    | <i>Ca_Kabuli_Chr08</i>       | 8194342                        | (T/C)       |
| 13874       | CakSNP13874    | <i>Kabuli</i>    | <i>Ca_Kabuli_Chr08</i>       | 8194464                        | (A/G)       |
| 13875       | CakSNP13875    | <i>Kabuli</i>    | <i>Ca_Kabuli_Chr08</i>       | 8194436                        | (T/A)       |
| 13876       | CakSNP13876    | <i>Kabuli</i>    | <i>Ca_Kabuli_Chr08</i>       | 8202726                        | (G/A)       |
| 13877       | CakSNP13877    | <i>Kabuli</i>    | <i>Ca_Kabuli_Chr08</i>       | 8270488                        | (T/C)       |
| 13878       | CakSNP13878    | <i>Kabuli</i>    | <i>Ca_Kabuli_Chr08</i>       | 8288041                        | (A/G)       |
| 13879       | CakSNP13879    | <i>Kabuli</i>    | <i>Ca_Kabuli_Chr08</i>       | 8293716                        | (G/A)       |
| 13880       | CakSNP13880    | <i>Kabuli</i>    | <i>Ca_Kabuli_Chr08</i>       | 8293704                        | (T/C)       |
| 13881       | CakSNP13881    | <i>Kabuli</i>    | <i>Ca_Kabuli_Chr08</i>       | 8293693                        | (T/C)       |
| 13882       | CakSNP13882    | <i>Kabuli</i>    | <i>Ca_Kabuli_Chr08</i>       | 8318110                        | (A/G)       |

| <b>S.N.</b> | <b>SNP IDs</b> | <b>Cultivars</b> | <b>Chromosomes/scaffolds</b> | <b>Physical positions (bp)</b> | <b>SNPs</b> |
|-------------|----------------|------------------|------------------------------|--------------------------------|-------------|
| 13883       | CakSNP13883    | <i>Kabuli</i>    | <i>Ca_Kabuli_Chr08</i>       | 8389117                        | (C/T)       |
| 13884       | CakSNP13884    | <i>Kabuli</i>    | <i>Ca_Kabuli_Chr08</i>       | 8458383                        | (G/A)       |
| 13885       | CakSNP13885    | <i>Kabuli</i>    | <i>Ca_Kabuli_Chr08</i>       | 8533479                        | (G/T)       |
| 13886       | CakSNP13886    | <i>Kabuli</i>    | <i>Ca_Kabuli_Chr08</i>       | 8533978                        | (G/A)       |
| 13887       | CakSNP13887    | <i>Kabuli</i>    | <i>Ca_Kabuli_Chr08</i>       | 8560330                        | (C/A)       |
| 13888       | CakSNP13888    | <i>Kabuli</i>    | <i>Ca_Kabuli_Chr08</i>       | 8560331                        | (C/G)       |
| 13889       | CakSNP13889    | <i>Kabuli</i>    | <i>Ca_Kabuli_Chr08</i>       | 8560332                        | (A/C)       |
| 13890       | CakSNP13890    | <i>Kabuli</i>    | <i>Ca_Kabuli_Chr08</i>       | 8560326                        | (G/T)       |
| 13891       | CakSNP13891    | <i>Kabuli</i>    | <i>Ca_Kabuli_Chr08</i>       | 8661327                        | (T/C)       |
| 13892       | CakSNP13892    | <i>Kabuli</i>    | <i>Ca_Kabuli_Chr08</i>       | 8670242                        | (T/G)       |
| 13893       | CakSNP13893    | <i>Kabuli</i>    | <i>Ca_Kabuli_Chr08</i>       | 8772131                        | (C/G)       |
| 13894       | CakSNP13894    | <i>Kabuli</i>    | <i>Ca_Kabuli_Chr08</i>       | 8772124                        | (G/A)       |
| 13895       | CakSNP13895    | <i>Kabuli</i>    | <i>Ca_Kabuli_Chr08</i>       | 8853602                        | (G/A)       |
| 13896       | CakSNP13896    | <i>Kabuli</i>    | <i>Ca_Kabuli_Chr08</i>       | 8853664                        | (A/G)       |
| 13897       | CakSNP13897    | <i>Kabuli</i>    | <i>Ca_Kabuli_Chr08</i>       | 8856046                        | (C/T)       |
| 13898       | CakSNP13898    | <i>Kabuli</i>    | <i>Ca_Kabuli_Chr08</i>       | 8856047                        | (C/T)       |
| 13899       | CakSNP13899    | <i>Kabuli</i>    | <i>Ca_Kabuli_Chr08</i>       | 8856150                        | (A/G)       |
| 13900       | CakSNP13900    | <i>Kabuli</i>    | <i>Ca_Kabuli_Chr08</i>       | 8856143                        | (G/A)       |
| 13901       | CakSNP13901    | <i>Kabuli</i>    | <i>Ca_Kabuli_Chr08</i>       | 8864079                        | (C/T)       |
| 13902       | CakSNP13902    | <i>Kabuli</i>    | <i>Ca_Kabuli_Chr08</i>       | 8864157                        | (G/A)       |
| 13903       | CakSNP13903    | <i>Kabuli</i>    | <i>Ca_Kabuli_Chr08</i>       | 8888412                        | (A/G)       |
| 13904       | CakSNP13904    | <i>Kabuli</i>    | <i>Ca_Kabuli_Chr08</i>       | 8888414                        | (G/T)       |
| 13905       | CakSNP13905    | <i>Kabuli</i>    | <i>Ca_Kabuli_Chr08</i>       | 8888426                        | (T/C)       |
| 13906       | CakSNP13906    | <i>Kabuli</i>    | <i>Ca_Kabuli_Chr08</i>       | 8888476                        | (A/C)       |
| 13907       | CakSNP13907    | <i>Kabuli</i>    | <i>Ca_Kabuli_Chr08</i>       | 8904346                        | (C/A)       |
| 13908       | CakSNP13908    | <i>Kabuli</i>    | <i>Ca_Kabuli_Chr08</i>       | 8904366                        | (A/G)       |
| 13909       | CakSNP13909    | <i>Kabuli</i>    | <i>Ca_Kabuli_Chr08</i>       | 8914018                        | (A/C)       |
| 13910       | CakSNP13910    | <i>Kabuli</i>    | <i>Ca_Kabuli_Chr08</i>       | 9097585                        | (A/C)       |
| 13911       | CakSNP13911    | <i>Kabuli</i>    | <i>Ca_Kabuli_Chr08</i>       | 9099798                        | (G/T)       |
| 13912       | CakSNP13912    | <i>Kabuli</i>    | <i>Ca_Kabuli_Chr08</i>       | 9100111                        | (C/T)       |
| 13913       | CakSNP13913    | <i>Kabuli</i>    | <i>Ca_Kabuli_Chr08</i>       | 9109896                        | (T/A)       |
| 13914       | CakSNP13914    | <i>Kabuli</i>    | <i>Ca_Kabuli_Chr08</i>       | 9109907                        | (A/T)       |
| 13915       | CakSNP13915    | <i>Kabuli</i>    | <i>Ca_Kabuli_Chr08</i>       | 9109920                        | (C/A)       |
| 13916       | CakSNP13916    | <i>Kabuli</i>    | <i>Ca_Kabuli_Chr08</i>       | 9112178                        | (G/A)       |
| 13917       | CakSNP13917    | <i>Kabuli</i>    | <i>Ca_Kabuli_Chr08</i>       | 9112172                        | (A/C)       |
| 13918       | CakSNP13918    | <i>Kabuli</i>    | <i>Ca_Kabuli_Chr08</i>       | 9118582                        | (C/T)       |
| 13919       | CakSNP13919    | <i>Kabuli</i>    | <i>Ca_Kabuli_Chr08</i>       | 9118667                        | (A/G)       |
| 13920       | CakSNP13920    | <i>Kabuli</i>    | <i>Ca_Kabuli_Chr08</i>       | 9143840                        | (C/A)       |
| 13921       | CakSNP13921    | <i>Kabuli</i>    | <i>Ca_Kabuli_Chr08</i>       | 9151722                        | (G/T)       |

| <b>S.N.</b> | <b>SNP IDs</b> | <b>Cultivars</b> | <b>Chromosomes/scaffolds</b> | <b>Physical positions (bp)</b> | <b>SNPs</b> |
|-------------|----------------|------------------|------------------------------|--------------------------------|-------------|
| 13922       | CakSNP13922    | <i>Kabuli</i>    | <i>Ca_Kabuli_Chr08</i>       | 9389347                        | (G/A)       |
| 13923       | CakSNP13923    | <i>Kabuli</i>    | <i>Ca_Kabuli_Chr08</i>       | 10004481                       | (T/C)       |
| 13924       | CakSNP13924    | <i>Kabuli</i>    | <i>Ca_Kabuli_Chr08</i>       | 10155981                       | (A/C)       |
| 13925       | CakSNP13925    | <i>Kabuli</i>    | <i>Ca_Kabuli_Chr08</i>       | 10258892                       | (T/G)       |
| 13926       | CakSNP13926    | <i>Kabuli</i>    | <i>Ca_Kabuli_Chr08</i>       | 10486601                       | (A/C)       |
| 13927       | CakSNP13927    | <i>Kabuli</i>    | <i>Ca_Kabuli_Chr08</i>       | 10556124                       | (T/C)       |
| 13928       | CakSNP13928    | <i>Kabuli</i>    | <i>Ca_Kabuli_Chr08</i>       | 10668422                       | (A/C)       |
| 13929       | CakSNP13929    | <i>Kabuli</i>    | <i>Ca_Kabuli_Chr08</i>       | 10728369                       | (G/C)       |
| 13930       | CakSNP13930    | <i>Kabuli</i>    | <i>Ca_Kabuli_Chr08</i>       | 10733404                       | (A/G)       |
| 13931       | CakSNP13931    | <i>Kabuli</i>    | <i>Ca_Kabuli_Chr08</i>       | 10733503                       | (C/T)       |
| 13932       | CakSNP13932    | <i>Kabuli</i>    | <i>Ca_Kabuli_Chr08</i>       | 10733661                       | (G/A)       |
| 13933       | CakSNP13933    | <i>Kabuli</i>    | <i>Ca_Kabuli_Chr08</i>       | 10733747                       | (C/T)       |
| 13934       | CakSNP13934    | <i>Kabuli</i>    | <i>Ca_Kabuli_Chr08</i>       | 10759078                       | (G/A)       |
| 13935       | CakSNP13935    | <i>Kabuli</i>    | <i>Ca_Kabuli_Chr08</i>       | 10759060                       | (G/A)       |
| 13936       | CakSNP13936    | <i>Kabuli</i>    | <i>Ca_Kabuli_Chr08</i>       | 10759056                       | (C/T)       |
| 13937       | CakSNP13937    | <i>Kabuli</i>    | <i>Ca_Kabuli_Chr08</i>       | 10759102                       | (C/T)       |
| 13938       | CakSNP13938    | <i>Kabuli</i>    | <i>Ca_Kabuli_Chr08</i>       | 10763656                       | (A/T)       |
| 13939       | CakSNP13939    | <i>Kabuli</i>    | <i>Ca_Kabuli_Chr08</i>       | 10953767                       | (C/T)       |
| 13940       | CakSNP13940    | <i>Kabuli</i>    | <i>Ca_Kabuli_Chr08</i>       | 11015680                       | (G/T)       |
| 13941       | CakSNP13941    | <i>Kabuli</i>    | <i>Ca_Kabuli_Chr08</i>       | 11015678                       | (C/G)       |
| 13942       | CakSNP13942    | <i>Kabuli</i>    | <i>Ca_Kabuli_Chr08</i>       | 11015666                       | (G/C)       |
| 13943       | CakSNP13943    | <i>Kabuli</i>    | <i>Ca_Kabuli_Chr08</i>       | 11066644                       | (C/T)       |
| 13944       | CakSNP13944    | <i>Kabuli</i>    | <i>Ca_Kabuli_Chr08</i>       | 11066728                       | (G/A)       |
| 13945       | CakSNP13945    | <i>Kabuli</i>    | <i>Ca_Kabuli_Chr08</i>       | 11087143                       | (A/G)       |
| 13946       | CakSNP13946    | <i>Kabuli</i>    | <i>Ca_Kabuli_Chr08</i>       | 11087169                       | (C/T)       |
| 13947       | CakSNP13947    | <i>Kabuli</i>    | <i>Ca_Kabuli_Chr08</i>       | 11087302                       | (A/T)       |
| 13948       | CakSNP13948    | <i>Kabuli</i>    | <i>Ca_Kabuli_Chr08</i>       | 11087250                       | (T/C)       |
| 13949       | CakSNP13949    | <i>Kabuli</i>    | <i>Ca_Kabuli_Chr08</i>       | 11087247                       | (T/C)       |
| 13950       | CakSNP13950    | <i>Kabuli</i>    | <i>Ca_Kabuli_Chr08</i>       | 11186919                       | (C/G)       |
| 13951       | CakSNP13951    | <i>Kabuli</i>    | <i>Ca_Kabuli_Chr08</i>       | 11187037                       | (T/C)       |
| 13952       | CakSNP13952    | <i>Kabuli</i>    | <i>Ca_Kabuli_Chr08</i>       | 11186986                       | (A/C)       |
| 13953       | CakSNP13953    | <i>Kabuli</i>    | <i>Ca_Kabuli_Chr08</i>       | 11186974                       | (A/C)       |
| 13954       | CakSNP13954    | <i>Kabuli</i>    | <i>Ca_Kabuli_Chr08</i>       | 11231812                       | (A/G)       |
| 13955       | CakSNP13955    | <i>Kabuli</i>    | <i>Ca_Kabuli_Chr08</i>       | 11240258                       | (C/A)       |
| 13956       | CakSNP13956    | <i>Kabuli</i>    | <i>Ca_Kabuli_Chr08</i>       | 11243263                       | (A/C)       |
| 13957       | CakSNP13957    | <i>Kabuli</i>    | <i>Ca_Kabuli_Chr08</i>       | 11243256                       | (A/C)       |
| 13958       | CakSNP13958    | <i>Kabuli</i>    | <i>Ca_Kabuli_Chr08</i>       | 11266447                       | (G/A)       |
| 13959       | CakSNP13959    | <i>Kabuli</i>    | <i>Ca_Kabuli_Chr08</i>       | 11310460                       | (G/A)       |
| 13960       | CakSNP13960    | <i>Kabuli</i>    | <i>Ca_Kabuli_Chr08</i>       | 11310480                       | (T/A)       |

| <b>S.N.</b> | <b>SNP IDs</b> | <b>Cultivars</b> | <b>Chromosomes/scaffolds</b> | <b>Physical positions (bp)</b> | <b>SNPs</b> |
|-------------|----------------|------------------|------------------------------|--------------------------------|-------------|
| 13961       | CakSNP13961    | <i>Kabuli</i>    | <i>Ca_Kabuli_Chr08</i>       | 11332934                       | (C/T)       |
| 13962       | CakSNP13962    | <i>Kabuli</i>    | <i>Ca_Kabuli_Chr08</i>       | 11332940                       | (T/C)       |
| 13963       | CakSNP13963    | <i>Kabuli</i>    | <i>Ca_Kabuli_Chr08</i>       | 11333057                       | (C/G)       |
| 13964       | CakSNP13964    | <i>Kabuli</i>    | <i>Ca_Kabuli_Chr08</i>       | 11334190                       | (A/T)       |
| 13965       | CakSNP13965    | <i>Kabuli</i>    | <i>Ca_Kabuli_Chr08</i>       | 11334210                       | (C/T)       |
| 13966       | CakSNP13966    | <i>Kabuli</i>    | <i>Ca_Kabuli_Chr08</i>       | 11349891                       | (T/A)       |
| 13967       | CakSNP13967    | <i>Kabuli</i>    | <i>Ca_Kabuli_Chr08</i>       | 11349995                       | (A/G)       |
| 13968       | CakSNP13968    | <i>Kabuli</i>    | <i>Ca_Kabuli_Chr08</i>       | 11403805                       | (G/A)       |
| 13969       | CakSNP13969    | <i>Kabuli</i>    | <i>Ca_Kabuli_Chr08</i>       | 11403754                       | (G/A)       |
| 13970       | CakSNP13970    | <i>Kabuli</i>    | <i>Ca_Kabuli_Chr08</i>       | 11562814                       | (A/C)       |
| 13971       | CakSNP13971    | <i>Kabuli</i>    | <i>Ca_Kabuli_Chr08</i>       | 11562833                       | (A/G)       |
| 13972       | CakSNP13972    | <i>Kabuli</i>    | <i>Ca_Kabuli_Chr08</i>       | 11631836                       | (C/T)       |
| 13973       | CakSNP13973    | <i>Kabuli</i>    | <i>Ca_Kabuli_Chr08</i>       | 11656700                       | (G/T)       |
| 13974       | CakSNP13974    | <i>Kabuli</i>    | <i>Ca_Kabuli_Chr08</i>       | 11656687                       | (A/G)       |
| 13975       | CakSNP13975    | <i>Kabuli</i>    | <i>Ca_Kabuli_Chr08</i>       | 11656675                       | (T/C)       |
| 13976       | CakSNP13976    | <i>Kabuli</i>    | <i>Ca_Kabuli_Chr08</i>       | 11656670                       | (A/G)       |
| 13977       | CakSNP13977    | <i>Kabuli</i>    | <i>Ca_Kabuli_Chr08</i>       | 11696021                       | (G/C)       |
| 13978       | CakSNP13978    | <i>Kabuli</i>    | <i>Ca_Kabuli_Chr08</i>       | 11735882                       | (A/C)       |
| 13979       | CakSNP13979    | <i>Kabuli</i>    | <i>Ca_Kabuli_Chr08</i>       | 11962280                       | (T/C)       |
| 13980       | CakSNP13980    | <i>Kabuli</i>    | <i>Ca_Kabuli_Chr08</i>       | 12875217                       | (A/G)       |
| 13981       | CakSNP13981    | <i>Kabuli</i>    | <i>Ca_Kabuli_Chr08</i>       | 13248268                       | (T/C)       |
| 13982       | CakSNP13982    | <i>Kabuli</i>    | <i>Ca_Kabuli_Chr08</i>       | 13745335                       | (A/G)       |
| 13983       | CakSNP13983    | <i>Kabuli</i>    | <i>Ca_Kabuli_Chr08</i>       | 13840865                       | (A/C)       |
| 13984       | CakSNP13984    | <i>Kabuli</i>    | <i>Ca_Kabuli_Chr08</i>       | 13860922                       | (C/G)       |
| 13985       | CakSNP13985    | <i>Kabuli</i>    | <i>Ca_Kabuli_Chr08</i>       | 13864026                       | (T/G)       |
| 13986       | CakSNP13986    | <i>Kabuli</i>    | <i>Ca_Kabuli_Chr08</i>       | 13864077                       | (T/C)       |
| 13987       | CakSNP13987    | <i>Kabuli</i>    | <i>Ca_Kabuli_Chr08</i>       | 13997385                       | (C/T)       |
| 13988       | CakSNP13988    | <i>Kabuli</i>    | <i>Ca_Kabuli_Chr08</i>       | 13998102                       | (A/G)       |
| 13989       | CakSNP13989    | <i>Kabuli</i>    | <i>Ca_Kabuli_Chr08</i>       | 14006709                       | (G/A)       |
| 13990       | CakSNP13990    | <i>Kabuli</i>    | <i>Ca_Kabuli_Chr08</i>       | 14006694                       | (C/T)       |
| 13991       | CakSNP13991    | <i>Kabuli</i>    | <i>Ca_Kabuli_Chr08</i>       | 14007431                       | (A/G)       |
| 13992       | CakSNP13992    | <i>Kabuli</i>    | <i>Ca_Kabuli_Chr08</i>       | 14124588                       | (C/A)       |
| 13993       | CakSNP13993    | <i>Kabuli</i>    | <i>Ca_Kabuli_Chr08</i>       | 14129040                       | (G/A)       |
| 13994       | CakSNP13994    | <i>Kabuli</i>    | <i>Ca_Kabuli_Chr08</i>       | 14325980                       | (C/A)       |
| 13995       | CakSNP13995    | <i>Kabuli</i>    | <i>Ca_Kabuli_Chr08</i>       | 14437006                       | (C/A)       |
| 13996       | CakSNP13996    | <i>Kabuli</i>    | <i>Ca_Kabuli_Chr08</i>       | 14444424                       | (G/A)       |
| 13997       | CakSNP13997    | <i>Kabuli</i>    | <i>Ca_Kabuli_Chr08</i>       | 14444438                       | (A/C)       |
| 13998       | CakSNP13998    | <i>Kabuli</i>    | <i>Ca_Kabuli_Chr08</i>       | 14445205                       | (C/A)       |
| 13999       | CakSNP13999    | <i>Kabuli</i>    | <i>Ca_Kabuli_Chr08</i>       | 14460426                       | (T/C)       |



| <b>S.N.</b> | <b>SNP IDs</b> | <b>Cultivars</b> | <b>Chromosomes/scaffolds</b> | <b>Physical positions (bp)</b> | <b>SNPs</b> |
|-------------|----------------|------------------|------------------------------|--------------------------------|-------------|
| 14000       | CakSNP14000    | <i>Kabuli</i>    | <i>Ca_Kabuli_Chr08</i>       | 14528882                       | (T/G)       |
| 14001       | CakSNP14001    | <i>Kabuli</i>    | <i>Ca_Kabuli_Chr08</i>       | 14528966                       | (C/G)       |
| 14002       | CakSNP14002    | <i>Kabuli</i>    | <i>Ca_Kabuli_Chr08</i>       | 14613302                       | (G/A)       |
| 14003       | CakSNP14003    | <i>Kabuli</i>    | <i>Ca_Kabuli_Chr08</i>       | 14640967                       | (A/C)       |
| 14004       | CakSNP14004    | <i>Kabuli</i>    | <i>Ca_Kabuli_Chr08</i>       | 14715495                       | (T/G)       |
| 14005       | CakSNP14005    | <i>Kabuli</i>    | <i>Ca_Kabuli_Chr08</i>       | 14753763                       | (T/C)       |
| 14006       | CakSNP14006    | <i>Kabuli</i>    | <i>Ca_Kabuli_Chr08</i>       | 14753750                       | (T/C)       |
| 14007       | CakSNP14007    | <i>Kabuli</i>    | <i>Ca_Kabuli_Chr08</i>       | 14754849                       | (A/T)       |
| 14008       | CakSNP14008    | <i>Kabuli</i>    | <i>Ca_Kabuli_Chr08</i>       | 14759784                       | (G/T)       |
| 14009       | CakSNP14009    | <i>Kabuli</i>    | <i>Ca_Kabuli_Chr08</i>       | 14760479                       | (C/G)       |
| 14010       | CakSNP14010    | <i>Kabuli</i>    | <i>Ca_Kabuli_Chr08</i>       | 14760497                       | (G/A)       |
| 14011       | CakSNP14011    | <i>Kabuli</i>    | <i>Ca_Kabuli_Chr08</i>       | 14760503                       | (A/T)       |
| 14012       | CakSNP14012    | <i>Kabuli</i>    | <i>Ca_Kabuli_Chr08</i>       | 14821416                       | (G/A)       |
| 14013       | CakSNP14013    | <i>Kabuli</i>    | <i>Ca_Kabuli_Chr08</i>       | 15000109                       | (A/G)       |
| 14014       | CakSNP14014    | <i>Kabuli</i>    | <i>Ca_Kabuli_Chr08</i>       | 15034465                       | (T/C)       |
| 14015       | CakSNP14015    | <i>Kabuli</i>    | <i>Ca_Kabuli_Chr08</i>       | 15131175                       | (G/A)       |
| 14016       | CakSNP14016    | <i>Kabuli</i>    | <i>Ca_Kabuli_Chr08</i>       | 15192125                       | (A/G)       |
| 14017       | CakSNP14017    | <i>Kabuli</i>    | <i>Ca_Kabuli_Chr08</i>       | 15207944                       | (C/T)       |
| 14018       | CakSNP14018    | <i>Kabuli</i>    | <i>Ca_Kabuli_Chr08</i>       | 15207976                       | (A/G)       |
| 14019       | CakSNP14019    | <i>Kabuli</i>    | <i>Ca_Kabuli_Chr08</i>       | 15220986                       | (C/G)       |
| 14020       | CakSNP14020    | <i>Kabuli</i>    | <i>Ca_Kabuli_Chr08</i>       | 15421764                       | (T/C)       |
| 14021       | CakSNP14021    | <i>Kabuli</i>    | <i>Ca_Kabuli_Chr08</i>       | 15421744                       | (T/G)       |
| 14022       | CakSNP14022    | <i>Kabuli</i>    | <i>Ca_Kabuli_Chr08</i>       | 15421719                       | (C/G)       |
| 14023       | CakSNP14023    | <i>Kabuli</i>    | <i>Ca_Kabuli_Chr08</i>       | 15422163                       | (A/T)       |
| 14024       | CakSNP14024    | <i>Kabuli</i>    | <i>Ca_Kabuli_Chr08</i>       | 15546669                       | (T/C)       |
| 14025       | CakSNP14025    | <i>Kabuli</i>    | <i>Ca_Kabuli_Chr08</i>       | 15546671                       | (A/C)       |
| 14026       | CakSNP14026    | <i>Kabuli</i>    | <i>Ca_Kabuli_Chr08</i>       | 15546696                       | (C/T)       |
| 14027       | CakSNP14027    | <i>Kabuli</i>    | <i>Ca_Kabuli_Chr08</i>       | 15546710                       | (T/A)       |
| 14028       | CakSNP14028    | <i>Kabuli</i>    | <i>Ca_Kabuli_Chr08</i>       | 15546758                       | (G/C)       |
| 14029       | CakSNP14029    | <i>Kabuli</i>    | <i>Ca_Kabuli_Chr08</i>       | 15553251                       | (A/G)       |
| 14030       | CakSNP14030    | <i>Kabuli</i>    | <i>Ca_Kabuli_Chr08</i>       | 15555771                       | (A/C)       |
| 14031       | CakSNP14031    | <i>Kabuli</i>    | <i>Ca_Kabuli_Chr08</i>       | 15699220                       | (T/A)       |
| 14032       | CakSNP14032    | <i>Kabuli</i>    | <i>Ca_Kabuli_Chr08</i>       | 15699180                       | (T/C)       |
| 14033       | CakSNP14033    | <i>Kabuli</i>    | <i>Ca_Kabuli_Chr08</i>       | 15741863                       | (C/G)       |
| 14034       | CakSNP14034    | <i>Kabuli</i>    | <i>Ca_Kabuli_Chr08</i>       | 15764739                       | (C/T)       |
| 14035       | CakSNP14035    | <i>Kabuli</i>    | <i>Ca_Kabuli_Chr08</i>       | 15764748                       | (G/A)       |
| 14036       | CakSNP14036    | <i>Kabuli</i>    | <i>Ca_Kabuli_Chr08</i>       | 15764823                       | (G/A)       |
| 14037       | CakSNP14037    | <i>Kabuli</i>    | <i>Ca_Kabuli_Chr08</i>       | 15764808                       | (C/A)       |
| 14038       | CakSNP14038    | <i>Kabuli</i>    | <i>Ca_Kabuli_Chr08</i>       | 15764874                       | (G/A)       |

| <b>S.N.</b> | <b>SNP IDs</b> | <b>Cultivars</b> | <b>Chromosomes/scaffolds</b> | <b>Physical positions (bp)</b> | <b>SNPs</b> |
|-------------|----------------|------------------|------------------------------|--------------------------------|-------------|
| 14039       | CakSNP14039    | <i>Kabuli</i>    | <i>Ca_Kabuli_Chr08</i>       | 15857176                       | (G/A)       |
| 14040       | CakSNP14040    | <i>Kabuli</i>    | <i>Ca_Kabuli_Chr08</i>       | 15857192                       | (A/G)       |
| 14041       | CakSNP14041    | <i>Kabuli</i>    | <i>Ca_Kabuli_Chr08</i>       | 15857359                       | (T/G)       |
| 14042       | CakSNP14042    | <i>Kabuli</i>    | <i>Ca_Kabuli_Chr08</i>       | 15863509                       | (T/C)       |
| 14043       | CakSNP14043    | <i>Kabuli</i>    | <i>Ca_Kabuli_Chr08</i>       | 15873071                       | (A/C)       |
| 14044       | CakSNP14044    | <i>Kabuli</i>    | <i>Ca_Kabuli_Chr08</i>       | 15873133                       | (A/G)       |
| 14045       | CakSNP14045    | <i>Kabuli</i>    | <i>Ca_Kabuli_Chr08</i>       | 16004976                       | (G/C)       |
| 14046       | CakSNP14046    | <i>Kabuli</i>    | <i>Ca_Kabuli_Chr08</i>       | 16005046                       | (C/T)       |
| 14047       | CakSNP14047    | <i>Kabuli</i>    | <i>Ca_Kabuli_Chr08</i>       | 16005078                       | (A/G)       |
| 14048       | CakSNP14048    | <i>Kabuli</i>    | <i>Ca_Kabuli_Chr08</i>       | 16005235                       | (A/G)       |
| 14049       | CakSNP14049    | <i>Kabuli</i>    | <i>Ca_Kabuli_Chr08</i>       | 16005253                       | (G/A)       |
| 14050       | CakSNP14050    | <i>Kabuli</i>    | <i>Ca_Kabuli_Chr08</i>       | 16020239                       | (C/A)       |
| 14051       | CakSNP14051    | <i>Kabuli</i>    | <i>Ca_Kabuli_Chr08</i>       | 16020277                       | (T/G)       |
| 14052       | CakSNP14052    | <i>Kabuli</i>    | <i>Ca_Kabuli_Chr08</i>       | 16020323                       | (G/T)       |
| 14053       | CakSNP14053    | <i>Kabuli</i>    | <i>Ca_Kabuli_Chr08</i>       | 16020305                       | (G/A)       |
| 14054       | CakSNP14054    | <i>Kabuli</i>    | <i>Ca_Kabuli_Chr08</i>       | 16022432                       | (C/T)       |
| 14055       | CakSNP14055    | <i>Kabuli</i>    | <i>Ca_Kabuli_Chr08</i>       | 16027974                       | (A/T)       |
| 14056       | CakSNP14056    | <i>Kabuli</i>    | <i>Ca_Kabuli_Chr08</i>       | 16028064                       | (G/T)       |
| 14057       | CakSNP14057    | <i>Kabuli</i>    | <i>Ca_Kabuli_Chr08</i>       | 16028062                       | (G/A)       |
| 14058       | CakSNP14058    | <i>Kabuli</i>    | <i>Ca_Kabuli_Chr08</i>       | 16028040                       | (A/G)       |
| 14059       | CakSNP14059    | <i>Kabuli</i>    | <i>Ca_Kabuli_Chr08</i>       | 16033779                       | (T/G)       |
| 14060       | CakSNP14060    | <i>Kabuli</i>    | <i>Ca_Kabuli_Chr08</i>       | 16076161                       | (C/G)       |
| 14061       | CakSNP14061    | <i>Kabuli</i>    | <i>Ca_Kabuli_Chr08</i>       | 16076168                       | (A/G)       |
| 14062       | CakSNP14062    | <i>Kabuli</i>    | <i>Ca_Kabuli_Chr08</i>       | 16102413                       | (C/T)       |
| 14063       | CakSNP14063    | <i>Kabuli</i>    | <i>Ca_Kabuli_Chr08</i>       | 16102395                       | (G/A)       |
| 14064       | CakSNP14064    | <i>Kabuli</i>    | <i>Ca_Kabuli_Chr08</i>       | 16102363                       | (T/C)       |
| 14065       | CakSNP14065    | <i>Kabuli</i>    | <i>Ca_Kabuli_Chr08</i>       | 16102362                       | (G/T)       |
| 14066       | CakSNP14066    | <i>Kabuli</i>    | <i>Ca_Kabuli_Chr08</i>       | 16102348                       | (A/T)       |
| 14067       | CakSNP14067    | <i>Kabuli</i>    | <i>Ca_Kabuli_Chr08</i>       | 16102343                       | (C/T)       |
| 14068       | CakSNP14068    | <i>Kabuli</i>    | <i>Ca_Kabuli_Chr08</i>       | 16102335                       | (A/T)       |
| 14069       | CakSNP14069    | <i>Kabuli</i>    | <i>Ca_Kabuli_Chr08</i>       | 16102414                       | (G/T)       |
| 14070       | CakSNP14070    | <i>Kabuli</i>    | <i>Ca_Kabuli_Chr08</i>       | 16144279                       | (T/A)       |
| 14071       | CakSNP14071    | <i>Kabuli</i>    | <i>Ca_Kabuli_Chr08</i>       | 16145275                       | (A/G)       |
| 14072       | CakSNP14072    | <i>Kabuli</i>    | <i>Ca_Kabuli_Chr08</i>       | 16145419                       | (A/G)       |
| 14073       | CakSNP14073    | <i>Kabuli</i>    | <i>Ca_Kabuli_Chr08</i>       | 16145411                       | (C/G)       |
| 14074       | CakSNP14074    | <i>Kabuli</i>    | <i>Ca_Kabuli_Chr08</i>       | 16145370                       | (C/A)       |
| 14075       | CakSNP14075    | <i>Kabuli</i>    | <i>Ca_Kabuli_Chr08</i>       | 16157015                       | (C/T)       |
| 14076       | CakSNP14076    | <i>Kabuli</i>    | <i>Ca_Kabuli_Chr08</i>       | 16157134                       | (A/C)       |
| 14077       | CakSNP14077    | <i>Kabuli</i>    | <i>Ca_Kabuli_Chr08</i>       | 16158594                       | (A/C)       |

| <b>S.N.</b> | <b>SNP IDs</b> | <b>Cultivars</b> | <b>Chromosomes/scaffolds</b> | <b>Physical positions (bp)</b> | <b>SNPs</b> |
|-------------|----------------|------------------|------------------------------|--------------------------------|-------------|
| 14078       | CakSNP14078    | <i>Kabuli</i>    | <i>Ca_Kabuli_Chr08</i>       | 16264310                       | (G/T)       |
| 14079       | CakSNP14079    | <i>Kabuli</i>    | <i>Ca_Kabuli_Chr08</i>       | 16268878                       | (T/C)       |
| 14080       | CakSNP14080    | <i>Kabuli</i>    | <i>Ca_Kabuli_Chr08</i>       | 16278758                       | (T/C)       |
| 14081       | CakSNP14081    | <i>Kabuli</i>    | <i>Ca_Kabuli_Chr08</i>       | 16283660                       | (C/T)       |
| 14082       | CakSNP14082    | <i>Kabuli</i>    | <i>Ca_Kabuli_Chr08</i>       | 16283661                       | (A/G)       |
| 14083       | CakSNP14083    | <i>Kabuli</i>    | <i>Ca_Kabuli_Chr08</i>       | 16283722                       | (A/G)       |
| 14084       | CakSNP14084    | <i>Kabuli</i>    | <i>Ca_Kabuli_Chr08</i>       | 16283738                       | (G/C)       |
| 14085       | CakSNP14085    | <i>Kabuli</i>    | <i>Ca_Kabuli_Chr08</i>       | 16283859                       | (T/C)       |
| 14086       | CakSNP14086    | <i>Kabuli</i>    | <i>Ca_Kabuli_Chr08</i>       | 16284269                       | (G/A)       |
| 14087       | CakSNP14087    | <i>Kabuli</i>    | <i>Ca_Kabuli_Chr08</i>       | 16284279                       | (A/C)       |
| 14088       | CakSNP14088    | <i>Kabuli</i>    | <i>Ca_Kabuli_Chr08</i>       | 16284306                       | (C/T)       |
| 14089       | CakSNP14089    | <i>Kabuli</i>    | <i>Ca_Kabuli_Chr08</i>       | 16309857                       | (G/T)       |
| 14090       | CakSNP14090    | <i>Kabuli</i>    | <i>Ca_Kabuli_Chr08</i>       | 16321524                       | (A/G)       |
| 14091       | CakSNP14091    | <i>Kabuli</i>    | <i>Ca_Kabuli_Chr08</i>       | 16321545                       | (G/T)       |
| 14092       | CakSNP14092    | <i>Kabuli</i>    | <i>Ca_Kabuli_Chr08</i>       | 16366490                       | (G/A)       |
| 14093       | CakSNP14093    | <i>Kabuli</i>    | <i>Ca_Kabuli_Chr08</i>       | 16381928                       | (T/G)       |
| 14094       | CakSNP14094    | <i>Kabuli</i>    | <i>Ca_Kabuli_Chr08</i>       | 16411550                       | (A/G)       |
| 14095       | CakSNP14095    | <i>Kabuli</i>    | <i>Ca_Kabuli_Chr08</i>       | 16412672                       | (T/C)       |
| 14096       | CakSNP14096    | <i>Kabuli</i>    | <i>Ca_Kabuli_Chr08</i>       | 16421407                       | (G/A)       |
| 14097       | CakSNP14097    | <i>Kabuli</i>    | <i>Ca_Kabuli_Chr08</i>       | 16421441                       | (C/A)       |
| 14098       | CakSNP14098    | <i>Kabuli</i>    | <i>Ca_Kabuli_Chr08</i>       | 16421442                       | (C/G)       |
| 14099       | CakSNP14099    | <i>Kabuli</i>    | <i>Ca_Kabuli_Chr08</i>       | 16421545                       | (G/T)       |
| 14100       | CakSNP14100    | <i>Kabuli</i>    | <i>Ca_Kabuli_Chr08</i>       | 16421497                       | (C/T)       |
| 14101       | CakSNP14101    | <i>Kabuli</i>    | <i>Ca_Kabuli_Chr08</i>       | 16421595                       | (A/C)       |
| 14102       | CakSNP14102    | <i>Kabuli</i>    | <i>Ca_Kabuli_Chr08</i>       | 16432907                       | (T/G)       |
| 14103       | CakSNP14103    | <i>Kabuli</i>    | <i>Ca_Kabuli_Chr08</i>       | 16472919                       | (T/A)       |
| 14104       | CakSNP14104    | <i>Kabuli</i>    | <i>Ca_Kabuli_Chr08</i>       | 16472932                       | (C/T)       |
| 14105       | CakSNP14105    | <i>Kabuli</i>    | <i>Ca_Kabuli_Chr08</i>       | 16472933                       | (G/C)       |
| 14106       | CakSNP14106    | <i>Kabuli</i>    | <i>Ca_Kabuli_Chr08</i>       | 16472999                       | (A/C)       |
| 14107       | CakSNP14107    | <i>Kabuli</i>    | <i>Ca_Kabuli_Chr08</i>       | 16473047                       | (C/G)       |
| 14108       | CakSNP14108    | <i>Kabuli</i>    | <i>Ca_Kabuli_Chr08</i>       | 16473139                       | (C/T)       |
| 14109       | CakSNP14109    | <i>Kabuli</i>    | <i>Ca_Kabuli_Chr08</i>       | 16473154                       | (T/A)       |
| 14110       | CakSNP14110    | <i>Kabuli</i>    | <i>Ca_Kabuli_Chr08</i>       | 16473157                       | (C/T)       |
| 14111       | CakSNP14111    | <i>Kabuli</i>    | <i>Ca_Kabuli_Chr08</i>       | 16473311                       | (A/G)       |
| 14112       | CakSNP14112    | <i>Kabuli</i>    | <i>Ca_Kabuli_Chr08</i>       | 16473290                       | (A/G)       |
| 14113       | CakSNP14113    | <i>Kabuli</i>    | <i>Ca_Kabuli_Chr08</i>       | 16473920                       | (A/G)       |
| 14114       | CakSNP14114    | <i>Kabuli</i>    | <i>Ca_Kabuli_Chr08</i>       | 16473939                       | (A/G)       |
| 14115       | CakSNP14115    | <i>Kabuli</i>    | <i>Ca_Kabuli_Chr08</i>       | 16473987                       | (C/T)       |
| 14116       | CakSNP14116    | <i>Kabuli</i>    | <i>Ca_Kabuli_C11058086</i>   | 341                            | (G/A)       |

| <b>S.N.</b> | <b>SNP IDs</b> | <b>Cultivars</b> | <b>Chromosomes/scaffolds</b> | <b>Physical positions (bp)</b> | <b>SNPs</b> |
|-------------|----------------|------------------|------------------------------|--------------------------------|-------------|
| 14117       | CakSNP14117    | <i>Kabuli</i>    | <i>Ca_Kabuli_C11058274</i>   | 143                            | (T/A)       |
| 14118       | CakSNP14118    | <i>Kabuli</i>    | <i>Ca_Kabuli_C11062332</i>   | 412                            | (G/A)       |
| 14119       | CakSNP14119    | <i>Kabuli</i>    | <i>Ca_Kabuli_C11062436</i>   | 381                            | (T/A)       |
| 14120       | CakSNP14120    | <i>Kabuli</i>    | <i>Ca_Kabuli_C11062546</i>   | 677                            | (G/T)       |
| 14121       | CakSNP14121    | <i>Kabuli</i>    | <i>Ca_Kabuli_C11076702</i>   | 989                            | (G/A)       |
| 14122       | CakSNP14122    | <i>Kabuli</i>    | <i>Ca_Kabuli_C11078452</i>   | 885                            | (G/A)       |
| 14123       | CakSNP14123    | <i>Kabuli</i>    | <i>Ca_Kabuli_C11079766</i>   | 1418                           | (A/C)       |
| 14124       | CakSNP14124    | <i>Kabuli</i>    | <i>Ca_Kabuli_C11079766</i>   | 1422                           | (G/C)       |
| 14125       | CakSNP14125    | <i>Kabuli</i>    | <i>Ca_Kabuli_C11079766</i>   | 1412                           | (A/T)       |
| 14126       | CakSNP14126    | <i>Kabuli</i>    | <i>Ca_Kabuli_C11080716</i>   | 1568                           | (A/C)       |
| 14127       | CakSNP14127    | <i>Kabuli</i>    | <i>Ca_Kabuli_C11084624</i>   | 656                            | (G/A)       |
| 14128       | CakSNP14128    | <i>Kabuli</i>    | <i>Ca_Kabuli_C11084992</i>   | 516                            | (A/G)       |
| 14129       | CakSNP14129    | <i>Kabuli</i>    | <i>Ca_Kabuli_C11084992</i>   | 537                            | (G/T)       |
| 14130       | CakSNP14130    | <i>Kabuli</i>    | <i>Ca_Kabuli_C11086066</i>   | 641                            | (A/C)       |
| 14131       | CakSNP14131    | <i>Kabuli</i>    | <i>Ca_Kabuli_C11086066</i>   | 624                            | (A/C)       |
| 14132       | CakSNP14132    | <i>Kabuli</i>    | <i>Ca_Kabuli_C11088694</i>   | 514                            | (G/C)       |
| 14133       | CakSNP14133    | <i>Kabuli</i>    | <i>Ca_Kabuli_C11119498</i>   | 682                            | (T/A)       |
| 14134       | CakSNP14134    | <i>Kabuli</i>    | <i>Ca_Kabuli_C11119498</i>   | 686                            | (C/A)       |
| 14135       | CakSNP14135    | <i>Kabuli</i>    | <i>Ca_Kabuli_C11119498</i>   | 689                            | (C/A)       |
| 14136       | CakSNP14136    | <i>Kabuli</i>    | <i>Ca_Kabuli_C11119498</i>   | 693                            | (G/A)       |
| 14137       | CakSNP14137    | <i>Kabuli</i>    | <i>Ca_Kabuli_C11132768</i>   | 2177                           | (G/A)       |
| 14138       | CakSNP14138    | <i>Kabuli</i>    | <i>Ca_Kabuli_C11142214</i>   | 2902                           | (G/T)       |
| 14139       | CakSNP14139    | <i>Kabuli</i>    | <i>Ca_Kabuli_C11142252</i>   | 3299                           | (A/C)       |
| 14140       | CakSNP14140    | <i>Kabuli</i>    | <i>Ca_Kabuli_C11143608</i>   | 1389                           | (A/T)       |
| 14141       | CakSNP14141    | <i>Kabuli</i>    | <i>Ca_Kabuli_C11147634</i>   | 3004                           | (C/A)       |
| 14142       | CakSNP14142    | <i>Kabuli</i>    | <i>Ca_Kabuli_C11147634</i>   | 3028                           | (C/T)       |
| 14143       | CakSNP14143    | <i>Kabuli</i>    | <i>Ca_Kabuli_C11149092</i>   | 2181                           | (A/G)       |
| 14144       | CakSNP14144    | <i>Kabuli</i>    | <i>Ca_Kabuli_C11149092</i>   | 2281                           | (T/C)       |
| 14145       | CakSNP14145    | <i>Kabuli</i>    | <i>Ca_Kabuli_C11149092</i>   | 2474                           | (T/A)       |
| 14146       | CakSNP14146    | <i>Kabuli</i>    | <i>Ca_Kabuli_C11149092</i>   | 3190                           | (T/G)       |
| 14147       | CakSNP14147    | <i>Kabuli</i>    | <i>Ca_Kabuli_C11149092</i>   | 3284                           | (C/G)       |
| 14148       | CakSNP14148    | <i>Kabuli</i>    | <i>Ca_Kabuli_C11153606</i>   | 4275                           | (C/T)       |
| 14149       | CakSNP14149    | <i>Kabuli</i>    | <i>Ca_Kabuli_C11157320</i>   | 766                            | (C/G)       |
| 14150       | CakSNP14150    | <i>Kabuli</i>    | <i>Ca_Kabuli_C11157320</i>   | 2169                           | (T/A)       |
| 14151       | CakSNP14151    | <i>Kabuli</i>    | <i>Ca_Kabuli_C11157320</i>   | 2152                           | (G/C)       |
| 14152       | CakSNP14152    | <i>Kabuli</i>    | <i>Ca_Kabuli_C11158050</i>   | 2186                           | (A/T)       |
| 14153       | CakSNP14153    | <i>Kabuli</i>    | <i>Ca_Kabuli_C11160518</i>   | 4522                           | (A/G)       |
| 14154       | CakSNP14154    | <i>Kabuli</i>    | <i>Ca_Kabuli_C11162020</i>   | 3914                           | (C/T)       |
| 14155       | CakSNP14155    | <i>Kabuli</i>    | <i>Ca_Kabuli_C11162020</i>   | 3926                           | (T/G)       |

| <b>S.N.</b> | <b>SNP IDs</b> | <b>Cultivars</b> | <b>Chromosomes/scaffolds</b>  | <b>Physical positions (bp)</b> | <b>SNPs</b> |
|-------------|----------------|------------------|-------------------------------|--------------------------------|-------------|
| 14156       | CakSNP14156    | <i>Kabuli</i>    | <i>Ca_Kabuli_C11162020</i>    | 5515                           | (G/A)       |
| 14157       | CakSNP14157    | <i>Kabuli</i>    | <i>Ca_Kabuli_C11164954</i>    | 5778                           | (T/A)       |
| 14158       | CakSNP14158    | <i>Kabuli</i>    | <i>Ca_Kabuli_C11164954</i>    | 5784                           | (G/A)       |
| 14159       | CakSNP14159    | <i>Kabuli</i>    | <i>Ca_Kabuli_C11165474</i>    | 6285                           | (T/A)       |
| 14160       | CakSNP14160    | <i>Kabuli</i>    | <i>Ca_Kabuli_C11165890</i>    | 154                            | (C/G)       |
| 14161       | CakSNP14161    | <i>Kabuli</i>    | <i>Ca_Kabuli_C11174756</i>    | 8931                           | (C/G)       |
| 14162       | CakSNP14162    | <i>Kabuli</i>    | <i>Ca_Kabuli_C11175430</i>    | 987                            | (A/G)       |
| 14163       | CakSNP14163    | <i>Kabuli</i>    | <i>Ca_Kabuli_C11175430</i>    | 3929                           | (T/G)       |
| 14164       | CakSNP14164    | <i>Kabuli</i>    | <i>Ca_Kabuli_C11175430</i>    | 3936                           | (G/T)       |
| 14165       | CakSNP14165    | <i>Kabuli</i>    | <i>Ca_Kabuli_C11175430</i>    | 3952                           | (T/C)       |
| 14166       | CakSNP14166    | <i>Kabuli</i>    | <i>Ca_Kabuli_C11176688</i>    | 4197                           | (G/C)       |
| 14167       | CakSNP14167    | <i>Kabuli</i>    | <i>Ca_Kabuli_C11177172</i>    | 2529                           | (T/G)       |
| 14168       | CakSNP14168    | <i>Kabuli</i>    | <i>Ca_Kabuli_C11177172</i>    | 2515                           | (T/A)       |
| 14169       | CakSNP14169    | <i>Kabuli</i>    | <i>Ca_Kabuli_C11177172</i>    | 5324                           | (G/A)       |
| 14170       | CakSNP14170    | <i>Kabuli</i>    | <i>Ca_Kabuli_C11177748</i>    | 1264                           | (T/A)       |
| 14171       | CakSNP14171    | <i>Kabuli</i>    | <i>Ca_Kabuli_C11178532</i>    | 2107                           | (A/T)       |
| 14172       | CakSNP14172    | <i>Kabuli</i>    | <i>Ca_Kabuli_C11178532</i>    | 3524                           | (A/G)       |
| 14173       | CakSNP14173    | <i>Kabuli</i>    | <i>Ca_Kabuli_C11181782</i>    | 6215                           | (A/G)       |
| 14174       | CakSNP14174    | <i>Kabuli</i>    | <i>Ca_Kabuli_C11181840</i>    | 19192                          | (A/G)       |
| 14175       | CakSNP14175    | <i>Kabuli</i>    | <i>Ca_Kabuli_C11181840</i>    | 19202                          | (T/C)       |
| 14176       | CakSNP14176    | <i>Kabuli</i>    | <i>Ca_Kabuli_Scaffold1006</i> | 40651                          | (T/A)       |
| 14177       | CakSNP14177    | <i>Kabuli</i>    | <i>Ca_Kabuli_Scaffold1006</i> | 382579                         | (C/T)       |
| 14178       | CakSNP14178    | <i>Kabuli</i>    | <i>Ca_Kabuli_Scaffold1006</i> | 436923                         | (T/C)       |
| 14179       | CakSNP14179    | <i>Kabuli</i>    | <i>Ca_Kabuli_Scaffold1006</i> | 644893                         | (A/C)       |
| 14180       | CakSNP14180    | <i>Kabuli</i>    | <i>Ca_Kabuli_Scaffold1006</i> | 667620                         | (A/G)       |
| 14181       | CakSNP14181    | <i>Kabuli</i>    | <i>Ca_Kabuli_Scaffold1006</i> | 667713                         | (G/A)       |
| 14182       | CakSNP14182    | <i>Kabuli</i>    | <i>Ca_Kabuli_Scaffold1006</i> | 674495                         | (A/G)       |
| 14183       | CakSNP14183    | <i>Kabuli</i>    | <i>Ca_Kabuli_Scaffold1006</i> | 674823                         | (G/A)       |
| 14184       | CakSNP14184    | <i>Kabuli</i>    | <i>Ca_Kabuli_Scaffold1006</i> | 674826                         | (C/T)       |
| 14185       | CakSNP14185    | <i>Kabuli</i>    | <i>Ca_Kabuli_Scaffold1006</i> | 674844                         | (T/C)       |
| 14186       | CakSNP14186    | <i>Kabuli</i>    | <i>Ca_Kabuli_Scaffold1006</i> | 674847                         | (T/G)       |
| 14187       | CakSNP14187    | <i>Kabuli</i>    | <i>Ca_Kabuli_Scaffold1006</i> | 674862                         | (G/A)       |
| 14188       | CakSNP14188    | <i>Kabuli</i>    | <i>Ca_Kabuli_Scaffold1006</i> | 674865                         | (T/C)       |
| 14189       | CakSNP14189    | <i>Kabuli</i>    | <i>Ca_Kabuli_Scaffold1006</i> | 674871                         | (A/G)       |
| 14190       | CakSNP14190    | <i>Kabuli</i>    | <i>Ca_Kabuli_Scaffold1006</i> | 674881                         | (G/A)       |
| 14191       | CakSNP14191    | <i>Kabuli</i>    | <i>Ca_Kabuli_Scaffold1006</i> | 674981                         | (G/A)       |
| 14192       | CakSNP14192    | <i>Kabuli</i>    | <i>Ca_Kabuli_Scaffold1006</i> | 674946                         | (G/A)       |
| 14193       | CakSNP14193    | <i>Kabuli</i>    | <i>Ca_Kabuli_Scaffold1010</i> | 90092                          | (G/A)       |
| 14194       | CakSNP14194    | <i>Kabuli</i>    | <i>Ca_Kabuli_Scaffold1013</i> | 56140                          | (G/A)       |

| <b>S.N.</b> | <b>SNP IDs</b> | <b>Cultivars</b> | <b>Chromosomes/scaffolds</b>   | <b>Physical positions (bp)</b> | <b>SNPs</b> |
|-------------|----------------|------------------|--------------------------------|--------------------------------|-------------|
| 14195       | CakSNP14195    | <i>Kabuli</i>    | <i>Ca_Kabuli_Scaffold1013</i>  | 56116                          | (C/T)       |
| 14196       | CakSNP14196    | <i>Kabuli</i>    | <i>Ca_Kabuli_Scaffold1013</i>  | 56114                          | (C/A)       |
| 14197       | CakSNP14197    | <i>Kabuli</i>    | <i>Ca_Kabuli_Scaffold1013</i>  | 56075                          | (T/A)       |
| 14198       | CakSNP14198    | <i>Kabuli</i>    | <i>Ca_Kabuli_Scaffold1013</i>  | 56074                          | (C/T)       |
| 14199       | CakSNP14199    | <i>Kabuli</i>    | <i>Ca_Kabuli_Scaffold1013</i>  | 56069                          | (C/T)       |
| 14200       | CakSNP14200    | <i>Kabuli</i>    | <i>Ca_Kabuli_Scaffold10186</i> | 416                            | (C/T)       |
| 14201       | CakSNP14201    | <i>Kabuli</i>    | <i>Ca_Kabuli_Scaffold10186</i> | 410                            | (A/C)       |
| 14202       | CakSNP14202    | <i>Kabuli</i>    | <i>Ca_Kabuli_Scaffold10186</i> | 378                            | (A/T)       |
| 14203       | CakSNP14203    | <i>Kabuli</i>    | <i>Ca_Kabuli_Scaffold10186</i> | 354                            | (T/A)       |
| 14204       | CakSNP14204    | <i>Kabuli</i>    | <i>Ca_Kabuli_Scaffold10186</i> | 397                            | (G/A)       |
| 14205       | CakSNP14205    | <i>Kabuli</i>    | <i>Ca_Kabuli_Scaffold10186</i> | 573                            | (T/G)       |
| 14206       | CakSNP14206    | <i>Kabuli</i>    | <i>Ca_Kabuli_Scaffold102</i>   | 82102                          | (T/C)       |
| 14207       | CakSNP14207    | <i>Kabuli</i>    | <i>Ca_Kabuli_Scaffold102</i>   | 82107                          | (C/A)       |
| 14208       | CakSNP14208    | <i>Kabuli</i>    | <i>Ca_Kabuli_Scaffold1027</i>  | 256612                         | (A/C)       |
| 14209       | CakSNP14209    | <i>Kabuli</i>    | <i>Ca_Kabuli_Scaffold1034</i>  | 73684                          | (G/A)       |
| 14210       | CakSNP14210    | <i>Kabuli</i>    | <i>Ca_Kabuli_Scaffold1034</i>  | 73695                          | (G/T)       |
| 14211       | CakSNP14211    | <i>Kabuli</i>    | <i>Ca_Kabuli_Scaffold10420</i> | 19974                          | (A/G)       |
| 14212       | CakSNP14212    | <i>Kabuli</i>    | <i>Ca_Kabuli_Scaffold10420</i> | 31513                          | (C/T)       |
| 14213       | CakSNP14213    | <i>Kabuli</i>    | <i>Ca_Kabuli_Scaffold10420</i> | 31563                          | (A/G)       |
| 14214       | CakSNP14214    | <i>Kabuli</i>    | <i>Ca_Kabuli_Scaffold10420</i> | 31817                          | (C/T)       |
| 14215       | CakSNP14215    | <i>Kabuli</i>    | <i>Ca_Kabuli_Scaffold10420</i> | 40193                          | (G/T)       |
| 14216       | CakSNP14216    | <i>Kabuli</i>    | <i>Ca_Kabuli_Scaffold1043</i>  | 16328                          | (A/T)       |
| 14217       | CakSNP14217    | <i>Kabuli</i>    | <i>Ca_Kabuli_Scaffold1043</i>  | 16331                          | (G/T)       |
| 14218       | CakSNP14218    | <i>Kabuli</i>    | <i>Ca_Kabuli_Scaffold1043</i>  | 16333                          | (A/T)       |
| 14219       | CakSNP14219    | <i>Kabuli</i>    | <i>Ca_Kabuli_Scaffold1043</i>  | 16313                          | (A/G)       |
| 14220       | CakSNP14220    | <i>Kabuli</i>    | <i>Ca_Kabuli_Scaffold1047</i>  | 235352                         | (T/C)       |
| 14221       | CakSNP14221    | <i>Kabuli</i>    | <i>Ca_Kabuli_Scaffold1047</i>  | 577874                         | (T/G)       |
| 14222       | CakSNP14222    | <i>Kabuli</i>    | <i>Ca_Kabuli_Scaffold1050</i>  | 3398                           | (G/A)       |
| 14223       | CakSNP14223    | <i>Kabuli</i>    | <i>Ca_Kabuli_Scaffold1050</i>  | 3415                           | (C/T)       |
| 14224       | CakSNP14224    | <i>Kabuli</i>    | <i>Ca_Kabuli_Scaffold1050</i>  | 3463                           | (C/T)       |
| 14225       | CakSNP14225    | <i>Kabuli</i>    | <i>Ca_Kabuli_Scaffold1050</i>  | 14057                          | (C/A)       |
| 14226       | CakSNP14226    | <i>Kabuli</i>    | <i>Ca_Kabuli_Scaffold1050</i>  | 126986                         | (T/G)       |
| 14227       | CakSNP14227    | <i>Kabuli</i>    | <i>Ca_Kabuli_Scaffold1050</i>  | 127022                         | (G/A)       |
| 14228       | CakSNP14228    | <i>Kabuli</i>    | <i>Ca_Kabuli_Scaffold1050</i>  | 127023                         | (G/T)       |
| 14229       | CakSNP14229    | <i>Kabuli</i>    | <i>Ca_Kabuli_Scaffold1050</i>  | 127054                         | (C/T)       |
| 14230       | CakSNP14230    | <i>Kabuli</i>    | <i>Ca_Kabuli_Scaffold1050</i>  | 128763                         | (A/G)       |
| 14231       | CakSNP14231    | <i>Kabuli</i>    | <i>Ca_Kabuli_Scaffold1055</i>  | 344459                         | (G/A)       |
| 14232       | CakSNP14232    | <i>Kabuli</i>    | <i>Ca_Kabuli_Scaffold1055</i>  | 344443                         | (G/A)       |
| 14233       | CakSNP14233    | <i>Kabuli</i>    | <i>Ca_Kabuli_Scaffold1055</i>  | 344399                         | (C/T)       |

| <b>S.N.</b> | <b>SNP IDs</b> | <b>Cultivars</b> | <b>Chromosomes/scaffolds</b>   | <b>Physical positions (bp)</b> | <b>SNPs</b> |
|-------------|----------------|------------------|--------------------------------|--------------------------------|-------------|
| 14234       | CakSNP14234    | <i>Kabuli</i>    | <i>Ca_Kabuli_Scaffold1060</i>  | 3278                           | (A/C)       |
| 14235       | CakSNP14235    | <i>Kabuli</i>    | <i>Ca_Kabuli_Scaffold1060</i>  | 3310                           | (G/T)       |
| 14236       | CakSNP14236    | <i>Kabuli</i>    | <i>Ca_Kabuli_Scaffold1060</i>  | 394867                         | (C/T)       |
| 14237       | CakSNP14237    | <i>Kabuli</i>    | <i>Ca_Kabuli_Scaffold1060</i>  | 395029                         | (C/T)       |
| 14238       | CakSNP14238    | <i>Kabuli</i>    | <i>Ca_Kabuli_Scaffold1060</i>  | 395042                         | (A/G)       |
| 14239       | CakSNP14239    | <i>Kabuli</i>    | <i>Ca_Kabuli_Scaffold1061</i>  | 63613                          | (A/G)       |
| 14240       | CakSNP14240    | <i>Kabuli</i>    | <i>Ca_Kabuli_Scaffold1061</i>  | 63620                          | (C/T)       |
| 14241       | CakSNP14241    | <i>Kabuli</i>    | <i>Ca_Kabuli_Scaffold1065</i>  | 142678                         | (A/C)       |
| 14242       | CakSNP14242    | <i>Kabuli</i>    | <i>Ca_Kabuli_Scaffold1067</i>  | 38623                          | (C/A)       |
| 14243       | CakSNP14243    | <i>Kabuli</i>    | <i>Ca_Kabuli_Scaffold1081</i>  | 768                            | (A/C)       |
| 14244       | CakSNP14244    | <i>Kabuli</i>    | <i>Ca_Kabuli_Scaffold1081</i>  | 798                            | (T/C)       |
| 14245       | CakSNP14245    | <i>Kabuli</i>    | <i>Ca_Kabuli_Scaffold1081</i>  | 800                            | (T/C)       |
| 14246       | CakSNP14246    | <i>Kabuli</i>    | <i>Ca_Kabuli_Scaffold1081</i>  | 805                            | (A/C)       |
| 14247       | CakSNP14247    | <i>Kabuli</i>    | <i>Ca_Kabuli_Scaffold1081</i>  | 818                            | (A/C)       |
| 14248       | CakSNP14248    | <i>Kabuli</i>    | <i>Ca_Kabuli_Scaffold1089</i>  | 1154                           | (C/A)       |
| 14249       | CakSNP14249    | <i>Kabuli</i>    | <i>Ca_Kabuli_Scaffold1089</i>  | 1240                           | (T/G)       |
| 14250       | CakSNP14250    | <i>Kabuli</i>    | <i>Ca_Kabuli_Scaffold1089</i>  | 1281                           | (G/A)       |
| 14251       | CakSNP14251    | <i>Kabuli</i>    | <i>Ca_Kabuli_Scaffold1089</i>  | 1278                           | (T/C)       |
| 14252       | CakSNP14252    | <i>Kabuli</i>    | <i>Ca_Kabuli_Scaffold1089</i>  | 3160                           | (C/A)       |
| 14253       | CakSNP14253    | <i>Kabuli</i>    | <i>Ca_Kabuli_Scaffold1089</i>  | 3173                           | (G/T)       |
| 14254       | CakSNP14254    | <i>Kabuli</i>    | <i>Ca_Kabuli_Scaffold1089</i>  | 3204                           | (G/C)       |
| 14255       | CakSNP14255    | <i>Kabuli</i>    | <i>Ca_Kabuli_Scaffold1089</i>  | 3236                           | (T/G)       |
| 14256       | CakSNP14256    | <i>Kabuli</i>    | <i>Ca_Kabuli_Scaffold1089</i>  | 3249                           | (T/G)       |
| 14257       | CakSNP14257    | <i>Kabuli</i>    | <i>Ca_Kabuli_Scaffold1089</i>  | 3248                           | (C/T)       |
| 14258       | CakSNP14258    | <i>Kabuli</i>    | <i>Ca_Kabuli_Scaffold1089</i>  | 3240                           | (G/C)       |
| 14259       | CakSNP14259    | <i>Kabuli</i>    | <i>Ca_Kabuli_Scaffold1089</i>  | 3228                           | (C/T)       |
| 14260       | CakSNP14260    | <i>Kabuli</i>    | <i>Ca_Kabuli_Scaffold1089</i>  | 3191                           | (G/A)       |
| 14261       | CakSNP14261    | <i>Kabuli</i>    | <i>Ca_Kabuli_Scaffold1089</i>  | 3274                           | (T/C)       |
| 14262       | CakSNP14262    | <i>Kabuli</i>    | <i>Ca_Kabuli_Scaffold1089</i>  | 137675                         | (T/C)       |
| 14263       | CakSNP14263    | <i>Kabuli</i>    | <i>Ca_Kabuli_Scaffold1089</i>  | 137679                         | (G/T)       |
| 14264       | CakSNP14264    | <i>Kabuli</i>    | <i>Ca_Kabuli_Scaffold109_1</i> | 156485                         | (C/T)       |
| 14265       | CakSNP14265    | <i>Kabuli</i>    | <i>Ca_Kabuli_Scaffold109_1</i> | 230701                         | (G/C)       |
| 14266       | CakSNP14266    | <i>Kabuli</i>    | <i>Ca_Kabuli_Scaffold109_1</i> | 244141                         | (A/C)       |
| 14267       | CakSNP14267    | <i>Kabuli</i>    | <i>Ca_Kabuli_Scaffold109_1</i> | 244150                         | (C/T)       |
| 14268       | CakSNP14268    | <i>Kabuli</i>    | <i>Ca_Kabuli_Scaffold109_1</i> | 244156                         | (A/C)       |
| 14269       | CakSNP14269    | <i>Kabuli</i>    | <i>Ca_Kabuli_Scaffold109_1</i> | 244176                         | (A/T)       |
| 14270       | CakSNP14270    | <i>Kabuli</i>    | <i>Ca_Kabuli_Scaffold109_1</i> | 328757                         | (C/T)       |
| 14271       | CakSNP14271    | <i>Kabuli</i>    | <i>Ca_Kabuli_Scaffold109_1</i> | 343415                         | (G/A)       |
| 14272       | CakSNP14272    | <i>Kabuli</i>    | <i>Ca_Kabuli_Scaffold109_1</i> | 343454                         | (G/A)       |

| <b>S.N.</b> | <b>SNP IDs</b> | <b>Cultivars</b> | <b>Chromosomes/scaffolds</b>   | <b>Physical positions (bp)</b> | <b>SNPs</b> |
|-------------|----------------|------------------|--------------------------------|--------------------------------|-------------|
| 14273       | CakSNP14273    | <i>Kabuli</i>    | <i>Ca_Kabuli_Scaffold109_1</i> | 385548                         | (T/C)       |
| 14274       | CakSNP14274    | <i>Kabuli</i>    | <i>Ca_Kabuli_Scaffold109_1</i> | 385578                         | (C/G)       |
| 14275       | CakSNP14275    | <i>Kabuli</i>    | <i>Ca_Kabuli_Scaffold109_1</i> | 385602                         | (C/T)       |
| 14276       | CakSNP14276    | <i>Kabuli</i>    | <i>Ca_Kabuli_Scaffold109_1</i> | 385660                         | (G/A)       |
| 14277       | CakSNP14277    | <i>Kabuli</i>    | <i>Ca_Kabuli_Scaffold109_1</i> | 385653                         | (C/T)       |
| 14278       | CakSNP14278    | <i>Kabuli</i>    | <i>Ca_Kabuli_Scaffold109_1</i> | 442149                         | (A/T)       |
| 14279       | CakSNP14279    | <i>Kabuli</i>    | <i>Ca_Kabuli_Scaffold109_1</i> | 535504                         | (G/C)       |
| 14280       | CakSNP14280    | <i>Kabuli</i>    | <i>Ca_Kabuli_Scaffold109_1</i> | 586181                         | (A/C)       |
| 14281       | CakSNP14281    | <i>Kabuli</i>    | <i>Ca_Kabuli_Scaffold109_1</i> | 586286                         | (C/T)       |
| 14282       | CakSNP14282    | <i>Kabuli</i>    | <i>Ca_Kabuli_Scaffold109_1</i> | 696869                         | (A/C)       |
| 14283       | CakSNP14283    | <i>Kabuli</i>    | <i>Ca_Kabuli_Scaffold109_1</i> | 734137                         | (G/A)       |
| 14284       | CakSNP14284    | <i>Kabuli</i>    | <i>Ca_Kabuli_Scaffold109_1</i> | 734141                         | (C/T)       |
| 14285       | CakSNP14285    | <i>Kabuli</i>    | <i>Ca_Kabuli_Scaffold109_1</i> | 741607                         | (G/A)       |
| 14286       | CakSNP14286    | <i>Kabuli</i>    | <i>Ca_Kabuli_Scaffold109_1</i> | 763160                         | (G/A)       |
| 14287       | CakSNP14287    | <i>Kabuli</i>    | <i>Ca_Kabuli_Scaffold1109</i>  | 150672                         | (G/A)       |
| 14288       | CakSNP14288    | <i>Kabuli</i>    | <i>Ca_Kabuli_Scaffold1109</i>  | 150720                         | (G/A)       |
| 14289       | CakSNP14289    | <i>Kabuli</i>    | <i>Ca_Kabuli_Scaffold1109</i>  | 150676                         | (C/T)       |
| 14290       | CakSNP14290    | <i>Kabuli</i>    | <i>Ca_Kabuli_Scaffold1115</i>  | 6234                           | (G/C)       |
| 14291       | CakSNP14291    | <i>Kabuli</i>    | <i>Ca_Kabuli_Scaffold1115</i>  | 131039                         | (G/A)       |
| 14292       | CakSNP14292    | <i>Kabuli</i>    | <i>Ca_Kabuli_Scaffold1115</i>  | 153349                         | (T/C)       |
| 14293       | CakSNP14293    | <i>Kabuli</i>    | <i>Ca_Kabuli_Scaffold1118</i>  | 2215                           | (T/C)       |
| 14294       | CakSNP14294    | <i>Kabuli</i>    | <i>Ca_Kabuli_Scaffold1118</i>  | 2224                           | (T/A)       |
| 14295       | CakSNP14295    | <i>Kabuli</i>    | <i>Ca_Kabuli_Scaffold1118</i>  | 2225                           | (C/T)       |
| 14296       | CakSNP14296    | <i>Kabuli</i>    | <i>Ca_Kabuli_Scaffold1118</i>  | 2226                           | (T/G)       |
| 14297       | CakSNP14297    | <i>Kabuli</i>    | <i>Ca_Kabuli_Scaffold1118</i>  | 2315                           | (T/C)       |
| 14298       | CakSNP14298    | <i>Kabuli</i>    | <i>Ca_Kabuli_Scaffold1118</i>  | 9568                           | (A/G)       |
| 14299       | CakSNP14299    | <i>Kabuli</i>    | <i>Ca_Kabuli_Scaffold1118</i>  | 9556                           | (C/T)       |
| 14300       | CakSNP14300    | <i>Kabuli</i>    | <i>Ca_Kabuli_Scaffold1128</i>  | 94196                          | (T/A)       |
| 14301       | CakSNP14301    | <i>Kabuli</i>    | <i>Ca_Kabuli_Scaffold1128</i>  | 112702                         | (G/A)       |
| 14302       | CakSNP14302    | <i>Kabuli</i>    | <i>Ca_Kabuli_Scaffold1128</i>  | 341416                         | (T/A)       |
| 14303       | CakSNP14303    | <i>Kabuli</i>    | <i>Ca_Kabuli_Scaffold1128</i>  | 360567                         | (T/A)       |
| 14304       | CakSNP14304    | <i>Kabuli</i>    | <i>Ca_Kabuli_Scaffold1128</i>  | 360529                         | (A/C)       |
| 14305       | CakSNP14305    | <i>Kabuli</i>    | <i>Ca_Kabuli_Scaffold1128</i>  | 423553                         | (A/G)       |
| 14306       | CakSNP14306    | <i>Kabuli</i>    | <i>Ca_Kabuli_Scaffold1132</i>  | 26497                          | (C/T)       |
| 14307       | CakSNP14307    | <i>Kabuli</i>    | <i>Ca_Kabuli_Scaffold1132</i>  | 26492                          | (G/A)       |
| 14308       | CakSNP14308    | <i>Kabuli</i>    | <i>Ca_Kabuli_Scaffold1134</i>  | 50630                          | (T/C)       |
| 14309       | CakSNP14309    | <i>Kabuli</i>    | <i>Ca_Kabuli_Scaffold1151</i>  | 228312                         | (C/G)       |
| 14310       | CakSNP14310    | <i>Kabuli</i>    | <i>Ca_Kabuli_Scaffold1151</i>  | 228304                         | (A/T)       |
| 14311       | CakSNP14311    | <i>Kabuli</i>    | <i>Ca_Kabuli_Scaffold1151</i>  | 228291                         | (C/T)       |



| <b>S.N.</b> | <b>SNP IDs</b> | <b>Cultivars</b> | <b>Chromosomes/scaffolds</b>    | <b>Physical positions (bp)</b> | <b>SNPs</b> |
|-------------|----------------|------------------|---------------------------------|--------------------------------|-------------|
| 14312       | CakSNP14312    | <i>Kabuli</i>    | <i>Ca_Kabuli_Scaffold1152</i>   | 9541                           | (A/G)       |
| 14313       | CakSNP14313    | <i>Kabuli</i>    | <i>Ca_Kabuli_Scaffold1176_2</i> | 52186                          | (C/T)       |
| 14314       | CakSNP14314    | <i>Kabuli</i>    | <i>Ca_Kabuli_Scaffold1176_2</i> | 52146                          | (T/C)       |
| 14315       | CakSNP14315    | <i>Kabuli</i>    | <i>Ca_Kabuli_Scaffold1176_2</i> | 52142                          | (G/T)       |
| 14316       | CakSNP14316    | <i>Kabuli</i>    | <i>Ca_Kabuli_Scaffold1176_2</i> | 52125                          | (C/T)       |
| 14317       | CakSNP14317    | <i>Kabuli</i>    | <i>Ca_Kabuli_Scaffold1176_2</i> | 52124                          | (C/T)       |
| 14318       | CakSNP14318    | <i>Kabuli</i>    | <i>Ca_Kabuli_Scaffold1176_2</i> | 330840                         | (C/A)       |
| 14319       | CakSNP14319    | <i>Kabuli</i>    | <i>Ca_Kabuli_Scaffold118</i>    | 206562                         | (A/G)       |
| 14320       | CakSNP14320    | <i>Kabuli</i>    | <i>Ca_Kabuli_Scaffold118</i>    | 303784                         | (A/C)       |
| 14321       | CakSNP14321    | <i>Kabuli</i>    | <i>Ca_Kabuli_Scaffold118</i>    | 332673                         | (T/C)       |
| 14322       | CakSNP14322    | <i>Kabuli</i>    | <i>Ca_Kabuli_Scaffold1180</i>   | 114508                         | (C/A)       |
| 14323       | CakSNP14323    | <i>Kabuli</i>    | <i>Ca_Kabuli_Scaffold1185</i>   | 944                            | (G/A)       |
| 14324       | CakSNP14324    | <i>Kabuli</i>    | <i>Ca_Kabuli_Scaffold1185</i>   | 1110                           | (G/A)       |
| 14325       | CakSNP14325    | <i>Kabuli</i>    | <i>Ca_Kabuli_Scaffold1185</i>   | 1134                           | (T/A)       |
| 14326       | CakSNP14326    | <i>Kabuli</i>    | <i>Ca_Kabuli_Scaffold1185</i>   | 1098                           | (T/C)       |
| 14327       | CakSNP14327    | <i>Kabuli</i>    | <i>Ca_Kabuli_Scaffold119</i>    | 12259                          | (A/G)       |
| 14328       | CakSNP14328    | <i>Kabuli</i>    | <i>Ca_Kabuli_Scaffold119</i>    | 12263                          | (C/A)       |
| 14329       | CakSNP14329    | <i>Kabuli</i>    | <i>Ca_Kabuli_Scaffold119</i>    | 12267                          | (C/A)       |
| 14330       | CakSNP14330    | <i>Kabuli</i>    | <i>Ca_Kabuli_Scaffold119</i>    | 12279                          | (G/A)       |
| 14331       | CakSNP14331    | <i>Kabuli</i>    | <i>Ca_Kabuli_Scaffold1196</i>   | 70506                          | (G/A)       |
| 14332       | CakSNP14332    | <i>Kabuli</i>    | <i>Ca_Kabuli_Scaffold1196</i>   | 70552                          | (A/C)       |
| 14333       | CakSNP14333    | <i>Kabuli</i>    | <i>Ca_Kabuli_Scaffold1196</i>   | 70549                          | (G/A)       |
| 14334       | CakSNP14334    | <i>Kabuli</i>    | <i>Ca_Kabuli_Scaffold1196</i>   | 70547                          | (G/C)       |
| 14335       | CakSNP14335    | <i>Kabuli</i>    | <i>Ca_Kabuli_Scaffold1196</i>   | 70535                          | (G/A)       |
| 14336       | CakSNP14336    | <i>Kabuli</i>    | <i>Ca_Kabuli_Scaffold1196</i>   | 70530                          | (C/T)       |
| 14337       | CakSNP14337    | <i>Kabuli</i>    | <i>Ca_Kabuli_Scaffold1196</i>   | 70526                          | (T/C)       |
| 14338       | CakSNP14338    | <i>Kabuli</i>    | <i>Ca_Kabuli_Scaffold1196</i>   | 70520                          | (G/A)       |
| 14339       | CakSNP14339    | <i>Kabuli</i>    | <i>Ca_Kabuli_Scaffold1196</i>   | 70503                          | (C/T)       |
| 14340       | CakSNP14340    | <i>Kabuli</i>    | <i>Ca_Kabuli_Scaffold1196</i>   | 203001                         | (G/A)       |
| 14341       | CakSNP14341    | <i>Kabuli</i>    | <i>Ca_Kabuli_Scaffold1197</i>   | 219637                         | (A/T)       |
| 14342       | CakSNP14342    | <i>Kabuli</i>    | <i>Ca_Kabuli_Scaffold1197</i>   | 344239                         | (A/C)       |
| 14343       | CakSNP14343    | <i>Kabuli</i>    | <i>Ca_Kabuli_Scaffold1197</i>   | 402506                         | (T/C)       |
| 14344       | CakSNP14344    | <i>Kabuli</i>    | <i>Ca_Kabuli_Scaffold1197</i>   | 407641                         | (G/A)       |
| 14345       | CakSNP14345    | <i>Kabuli</i>    | <i>Ca_Kabuli_Scaffold1197</i>   | 407658                         | (C/G)       |
| 14346       | CakSNP14346    | <i>Kabuli</i>    | <i>Ca_Kabuli_Scaffold1197</i>   | 407691                         | (T/C)       |
| 14347       | CakSNP14347    | <i>Kabuli</i>    | <i>Ca_Kabuli_Scaffold1197</i>   | 407695                         | (T/C)       |
| 14348       | CakSNP14348    | <i>Kabuli</i>    | <i>Ca_Kabuli_Scaffold1197</i>   | 447890                         | (C/T)       |
| 14349       | CakSNP14349    | <i>Kabuli</i>    | <i>Ca_Kabuli_Scaffold1197</i>   | 520164                         | (T/A)       |
| 14350       | CakSNP14350    | <i>Kabuli</i>    | <i>Ca_Kabuli_Scaffold1197</i>   | 520153                         | (C/G)       |

| <b>S.N.</b> | <b>SNP IDs</b> | <b>Cultivars</b> | <b>Chromosomes/scaffolds</b>  | <b>Physical positions (bp)</b> | <b>SNPs</b> |
|-------------|----------------|------------------|-------------------------------|--------------------------------|-------------|
| 14351       | CakSNP14351    | <i>Kabuli</i>    | <i>Ca_Kabuli_Scaffold1197</i> | 520148                         | (A/T)       |
| 14352       | CakSNP14352    | <i>Kabuli</i>    | <i>Ca_Kabuli_Scaffold12</i>   | 107756                         | (G/A)       |
| 14353       | CakSNP14353    | <i>Kabuli</i>    | <i>Ca_Kabuli_Scaffold12</i>   | 200573                         | (G/C)       |
| 14354       | CakSNP14354    | <i>Kabuli</i>    | <i>Ca_Kabuli_Scaffold12</i>   | 331877                         | (G/A)       |
| 14355       | CakSNP14355    | <i>Kabuli</i>    | <i>Ca_Kabuli_Scaffold12</i>   | 331890                         | (A/G)       |
| 14356       | CakSNP14356    | <i>Kabuli</i>    | <i>Ca_Kabuli_Scaffold12</i>   | 332909                         | (C/T)       |
| 14357       | CakSNP14357    | <i>Kabuli</i>    | <i>Ca_Kabuli_Scaffold12</i>   | 332921                         | (G/A)       |
| 14358       | CakSNP14358    | <i>Kabuli</i>    | <i>Ca_Kabuli_Scaffold12</i>   | 332963                         | (C/T)       |
| 14359       | CakSNP14359    | <i>Kabuli</i>    | <i>Ca_Kabuli_Scaffold1202</i> | 46904                          | (C/T)       |
| 14360       | CakSNP14360    | <i>Kabuli</i>    | <i>Ca_Kabuli_Scaffold1202</i> | 46945                          | (G/A)       |
| 14361       | CakSNP14361    | <i>Kabuli</i>    | <i>Ca_Kabuli_Scaffold1215</i> | 40741                          | (G/T)       |
| 14362       | CakSNP14362    | <i>Kabuli</i>    | <i>Ca_Kabuli_Scaffold1215</i> | 40793                          | (A/G)       |
| 14363       | CakSNP14363    | <i>Kabuli</i>    | <i>Ca_Kabuli_Scaffold1215</i> | 40797                          | (A/T)       |
| 14364       | CakSNP14364    | <i>Kabuli</i>    | <i>Ca_Kabuli_Scaffold1215</i> | 40817                          | (G/A)       |
| 14365       | CakSNP14365    | <i>Kabuli</i>    | <i>Ca_Kabuli_Scaffold1215</i> | 40814                          | (A/T)       |
| 14366       | CakSNP14366    | <i>Kabuli</i>    | <i>Ca_Kabuli_Scaffold1219</i> | 34791                          | (G/A)       |
| 14367       | CakSNP14367    | <i>Kabuli</i>    | <i>Ca_Kabuli_Scaffold1219</i> | 85015                          | (A/C)       |
| 14368       | CakSNP14368    | <i>Kabuli</i>    | <i>Ca_Kabuli_Scaffold1259</i> | 71428                          | (C/T)       |
| 14369       | CakSNP14369    | <i>Kabuli</i>    | <i>Ca_Kabuli_Scaffold1259</i> | 71574                          | (A/T)       |
| 14370       | CakSNP14370    | <i>Kabuli</i>    | <i>Ca_Kabuli_Scaffold1259</i> | 71649                          | (C/T)       |
| 14371       | CakSNP14371    | <i>Kabuli</i>    | <i>Ca_Kabuli_Scaffold127</i>  | 28809                          | (A/T)       |
| 14372       | CakSNP14372    | <i>Kabuli</i>    | <i>Ca_Kabuli_Scaffold127</i>  | 28780                          | (G/A)       |
| 14373       | CakSNP14373    | <i>Kabuli</i>    | <i>Ca_Kabuli_Scaffold127</i>  | 28778                          | (C/T)       |
| 14374       | CakSNP14374    | <i>Kabuli</i>    | <i>Ca_Kabuli_Scaffold127</i>  | 28776                          | (T/G)       |
| 14375       | CakSNP14375    | <i>Kabuli</i>    | <i>Ca_Kabuli_Scaffold127</i>  | 28772                          | (G/A)       |
| 14376       | CakSNP14376    | <i>Kabuli</i>    | <i>Ca_Kabuli_Scaffold1272</i> | 57303                          | (C/A)       |
| 14377       | CakSNP14377    | <i>Kabuli</i>    | <i>Ca_Kabuli_Scaffold1272</i> | 57356                          | (C/G)       |
| 14378       | CakSNP14378    | <i>Kabuli</i>    | <i>Ca_Kabuli_Scaffold128</i>  | 19256                          | (A/C)       |
| 14379       | CakSNP14379    | <i>Kabuli</i>    | <i>Ca_Kabuli_Scaffold128</i>  | 19315                          | (C/T)       |
| 14380       | CakSNP14380    | <i>Kabuli</i>    | <i>Ca_Kabuli_Scaffold128</i>  | 52881                          | (G/A)       |
| 14381       | CakSNP14381    | <i>Kabuli</i>    | <i>Ca_Kabuli_Scaffold128</i>  | 52855                          | (G/C)       |
| 14382       | CakSNP14382    | <i>Kabuli</i>    | <i>Ca_Kabuli_Scaffold128</i>  | 52844                          | (A/T)       |
| 14383       | CakSNP14383    | <i>Kabuli</i>    | <i>Ca_Kabuli_Scaffold128</i>  | 263590                         | (G/T)       |
| 14384       | CakSNP14384    | <i>Kabuli</i>    | <i>Ca_Kabuli_Scaffold128</i>  | 263586                         | (T/A)       |
| 14385       | CakSNP14385    | <i>Kabuli</i>    | <i>Ca_Kabuli_Scaffold128</i>  | 263572                         | (T/A)       |
| 14386       | CakSNP14386    | <i>Kabuli</i>    | <i>Ca_Kabuli_Scaffold128</i>  | 334180                         | (G/T)       |
| 14387       | CakSNP14387    | <i>Kabuli</i>    | <i>Ca_Kabuli_Scaffold128</i>  | 334129                         | (G/A)       |
| 14388       | CakSNP14388    | <i>Kabuli</i>    | <i>Ca_Kabuli_Scaffold128</i>  | 593782                         | (T/C)       |
| 14389       | CakSNP14389    | <i>Kabuli</i>    | <i>Ca_Kabuli_Scaffold128</i>  | 860975                         | (G/A)       |

| <b>S.N.</b> | <b>SNP IDs</b> | <b>Cultivars</b> | <b>Chromosomes/scaffolds</b>  | <b>Physical positions (bp)</b> | <b>SNPs</b> |
|-------------|----------------|------------------|-------------------------------|--------------------------------|-------------|
| 14390       | CakSNP14390    | <i>Kabuli</i>    | <i>Ca_Kabuli_Scaffold128</i>  | 860981                         | (T/A)       |
| 14391       | CakSNP14391    | <i>Kabuli</i>    | <i>Ca_Kabuli_Scaffold128</i>  | 860983                         | (A/T)       |
| 14392       | CakSNP14392    | <i>Kabuli</i>    | <i>Ca_Kabuli_Scaffold128</i>  | 860987                         | (C/T)       |
| 14393       | CakSNP14393    | <i>Kabuli</i>    | <i>Ca_Kabuli_Scaffold128</i>  | 861003                         | (C/A)       |
| 14394       | CakSNP14394    | <i>Kabuli</i>    | <i>Ca_Kabuli_Scaffold128</i>  | 861010                         | (C/T)       |
| 14395       | CakSNP14395    | <i>Kabuli</i>    | <i>Ca_Kabuli_Scaffold128</i>  | 861022                         | (T/C)       |
| 14396       | CakSNP14396    | <i>Kabuli</i>    | <i>Ca_Kabuli_Scaffold128</i>  | 861028                         | (T/C)       |
| 14397       | CakSNP14397    | <i>Kabuli</i>    | <i>Ca_Kabuli_Scaffold128</i>  | 861072                         | (G/T)       |
| 14398       | CakSNP14398    | <i>Kabuli</i>    | <i>Ca_Kabuli_Scaffold128</i>  | 861053                         | (G/A)       |
| 14399       | CakSNP14399    | <i>Kabuli</i>    | <i>Ca_Kabuli_Scaffold128</i>  | 861036                         | (G/A)       |
| 14400       | CakSNP14400    | <i>Kabuli</i>    | <i>Ca_Kabuli_Scaffold128</i>  | 861015                         | (C/T)       |
| 14401       | CakSNP14401    | <i>Kabuli</i>    | <i>Ca_Kabuli_Scaffold1281</i> | 211456                         | (A/T)       |
| 14402       | CakSNP14402    | <i>Kabuli</i>    | <i>Ca_Kabuli_Scaffold1281</i> | 239742                         | (T/C)       |
| 14403       | CakSNP14403    | <i>Kabuli</i>    | <i>Ca_Kabuli_Scaffold1281</i> | 244153                         | (A/C)       |
| 14404       | CakSNP14404    | <i>Kabuli</i>    | <i>Ca_Kabuli_Scaffold1281</i> | 258565                         | (G/A)       |
| 14405       | CakSNP14405    | <i>Kabuli</i>    | <i>Ca_Kabuli_Scaffold1281</i> | 316037                         | (A/G)       |
| 14406       | CakSNP14406    | <i>Kabuli</i>    | <i>Ca_Kabuli_Scaffold1281</i> | 396888                         | (G/A)       |
| 14407       | CakSNP14407    | <i>Kabuli</i>    | <i>Ca_Kabuli_Scaffold1281</i> | 396996                         | (C/T)       |
| 14408       | CakSNP14408    | <i>Kabuli</i>    | <i>Ca_Kabuli_Scaffold1281</i> | 396992                         | (A/G)       |
| 14409       | CakSNP14409    | <i>Kabuli</i>    | <i>Ca_Kabuli_Scaffold1281</i> | 398693                         | (G/A)       |
| 14410       | CakSNP14410    | <i>Kabuli</i>    | <i>Ca_Kabuli_Scaffold1281</i> | 398729                         | (T/G)       |
| 14411       | CakSNP14411    | <i>Kabuli</i>    | <i>Ca_Kabuli_Scaffold1281</i> | 398887                         | (G/A)       |
| 14412       | CakSNP14412    | <i>Kabuli</i>    | <i>Ca_Kabuli_Scaffold1281</i> | 408214                         | (C/T)       |
| 14413       | CakSNP14413    | <i>Kabuli</i>    | <i>Ca_Kabuli_Scaffold1281</i> | 408170                         | (C/T)       |
| 14414       | CakSNP14414    | <i>Kabuli</i>    | <i>Ca_Kabuli_Scaffold1281</i> | 526446                         | (C/T)       |
| 14415       | CakSNP14415    | <i>Kabuli</i>    | <i>Ca_Kabuli_Scaffold1281</i> | 526442                         | (T/C)       |
| 14416       | CakSNP14416    | <i>Kabuli</i>    | <i>Ca_Kabuli_Scaffold1281</i> | 527012                         | (C/T)       |
| 14417       | CakSNP14417    | <i>Kabuli</i>    | <i>Ca_Kabuli_Scaffold1281</i> | 527008                         | (T/C)       |
| 14418       | CakSNP14418    | <i>Kabuli</i>    | <i>Ca_Kabuli_Scaffold1285</i> | 68330                          | (G/A)       |
| 14419       | CakSNP14419    | <i>Kabuli</i>    | <i>Ca_Kabuli_Scaffold1285</i> | 68327                          | (G/T)       |
| 14420       | CakSNP14420    | <i>Kabuli</i>    | <i>Ca_Kabuli_Scaffold1285</i> | 68324                          | (T/C)       |
| 14421       | CakSNP14421    | <i>Kabuli</i>    | <i>Ca_Kabuli_Scaffold1285</i> | 68315                          | (T/C)       |
| 14422       | CakSNP14422    | <i>Kabuli</i>    | <i>Ca_Kabuli_Scaffold1285</i> | 68311                          | (G/A)       |
| 14423       | CakSNP14423    | <i>Kabuli</i>    | <i>Ca_Kabuli_Scaffold1285</i> | 96310                          | (A/C)       |
| 14424       | CakSNP14424    | <i>Kabuli</i>    | <i>Ca_Kabuli_Scaffold1285</i> | 96358                          | (T/C)       |
| 14425       | CakSNP14425    | <i>Kabuli</i>    | <i>Ca_Kabuli_Scaffold1285</i> | 96429                          | (C/T)       |
| 14426       | CakSNP14426    | <i>Kabuli</i>    | <i>Ca_Kabuli_Scaffold1285</i> | 96428                          | (G/A)       |
| 14427       | CakSNP14427    | <i>Kabuli</i>    | <i>Ca_Kabuli_Scaffold1285</i> | 96414                          | (C/T)       |
| 14428       | CakSNP14428    | <i>Kabuli</i>    | <i>Ca_Kabuli_Scaffold1285</i> | 96411                          | (G/A)       |

| <b>S.N.</b> | <b>SNP IDs</b> | <b>Cultivars</b> | <b>Chromosomes/scaffolds</b>    | <b>Physical positions (bp)</b> | <b>SNPs</b> |
|-------------|----------------|------------------|---------------------------------|--------------------------------|-------------|
| 14429       | CakSNP14429    | <i>Kabuli</i>    | <i>Ca_Kabuli_Scaffold1285</i>   | 96409                          | (C/T)       |
| 14430       | CakSNP14430    | <i>Kabuli</i>    | <i>Ca_Kabuli_Scaffold1285</i>   | 96399                          | (C/T)       |
| 14431       | CakSNP14431    | <i>Kabuli</i>    | <i>Ca_Kabuli_Scaffold1285</i>   | 105553                         | (T/C)       |
| 14432       | CakSNP14432    | <i>Kabuli</i>    | <i>Ca_Kabuli_Scaffold1285</i>   | 105507                         | (A/T)       |
| 14433       | CakSNP14433    | <i>Kabuli</i>    | <i>Ca_Kabuli_Scaffold1285</i>   | 105504                         | (G/A)       |
| 14434       | CakSNP14434    | <i>Kabuli</i>    | <i>Ca_Kabuli_Scaffold1285</i>   | 192068                         | (T/G)       |
| 14435       | CakSNP14435    | <i>Kabuli</i>    | <i>Ca_Kabuli_Scaffold1285</i>   | 240762                         | (C/T)       |
| 14436       | CakSNP14436    | <i>Kabuli</i>    | <i>Ca_Kabuli_Scaffold1285</i>   | 240735                         | (G/A)       |
| 14437       | CakSNP14437    | <i>Kabuli</i>    | <i>Ca_Kabuli_Scaffold1285</i>   | 240730                         | (T/C)       |
| 14438       | CakSNP14438    | <i>Kabuli</i>    | <i>Ca_Kabuli_Scaffold1285</i>   | 240723                         | (C/T)       |
| 14439       | CakSNP14439    | <i>Kabuli</i>    | <i>Ca_Kabuli_Scaffold1301_1</i> | 43433                          | (T/C)       |
| 14440       | CakSNP14440    | <i>Kabuli</i>    | <i>Ca_Kabuli_Scaffold1301_1</i> | 45565                          | (A/C)       |
| 14441       | CakSNP14441    | <i>Kabuli</i>    | <i>Ca_Kabuli_Scaffold1301_1</i> | 45566                          | (G/A)       |
| 14442       | CakSNP14442    | <i>Kabuli</i>    | <i>Ca_Kabuli_Scaffold1301_1</i> | 58243                          | (A/G)       |
| 14443       | CakSNP14443    | <i>Kabuli</i>    | <i>Ca_Kabuli_Scaffold1301_1</i> | 58337                          | (C/T)       |
| 14444       | CakSNP14444    | <i>Kabuli</i>    | <i>Ca_Kabuli_Scaffold1301_1</i> | 58460                          | (A/T)       |
| 14445       | CakSNP14445    | <i>Kabuli</i>    | <i>Ca_Kabuli_Scaffold1301_1</i> | 63148                          | (T/C)       |
| 14446       | CakSNP14446    | <i>Kabuli</i>    | <i>Ca_Kabuli_Scaffold1301_1</i> | 95495                          | (G/A)       |
| 14447       | CakSNP14447    | <i>Kabuli</i>    | <i>Ca_Kabuli_Scaffold1301_1</i> | 95497                          | (G/A)       |
| 14448       | CakSNP14448    | <i>Kabuli</i>    | <i>Ca_Kabuli_Scaffold1301_1</i> | 95602                          | (T/C)       |
| 14449       | CakSNP14449    | <i>Kabuli</i>    | <i>Ca_Kabuli_Scaffold1301_1</i> | 95533                          | (C/G)       |
| 14450       | CakSNP14450    | <i>Kabuli</i>    | <i>Ca_Kabuli_Scaffold1301_1</i> | 122496                         | (T/A)       |
| 14451       | CakSNP14451    | <i>Kabuli</i>    | <i>Ca_Kabuli_Scaffold1301_1</i> | 122563                         | (T/C)       |
| 14452       | CakSNP14452    | <i>Kabuli</i>    | <i>Ca_Kabuli_Scaffold1301_1</i> | 154342                         | (A/C)       |
| 14453       | CakSNP14453    | <i>Kabuli</i>    | <i>Ca_Kabuli_Scaffold1301_1</i> | 157390                         | (A/G)       |
| 14454       | CakSNP14454    | <i>Kabuli</i>    | <i>Ca_Kabuli_Scaffold1301_1</i> | 218538                         | (G/A)       |
| 14455       | CakSNP14455    | <i>Kabuli</i>    | <i>Ca_Kabuli_Scaffold1308</i>   | 44260                          | (A/G)       |
| 14456       | CakSNP14456    | <i>Kabuli</i>    | <i>Ca_Kabuli_Scaffold1309</i>   | 49259                          | (G/A)       |
| 14457       | CakSNP14457    | <i>Kabuli</i>    | <i>Ca_Kabuli_Scaffold1312</i>   | 98400                          | (T/C)       |
| 14458       | CakSNP14458    | <i>Kabuli</i>    | <i>Ca_Kabuli_Scaffold1313</i>   | 18173                          | (A/G)       |
| 14459       | CakSNP14459    | <i>Kabuli</i>    | <i>Ca_Kabuli_Scaffold1313</i>   | 18412                          | (G/A)       |
| 14460       | CakSNP14460    | <i>Kabuli</i>    | <i>Ca_Kabuli_Scaffold1313</i>   | 227732                         | (G/A)       |
| 14461       | CakSNP14461    | <i>Kabuli</i>    | <i>Ca_Kabuli_Scaffold1313</i>   | 227744                         | (C/T)       |
| 14462       | CakSNP14462    | <i>Kabuli</i>    | <i>Ca_Kabuli_Scaffold1315</i>   | 115480                         | (G/A)       |
| 14463       | CakSNP14463    | <i>Kabuli</i>    | <i>Ca_Kabuli_Scaffold1315</i>   | 115476                         | (A/C)       |
| 14464       | CakSNP14464    | <i>Kabuli</i>    | <i>Ca_Kabuli_Scaffold1315</i>   | 115471                         | (G/A)       |
| 14465       | CakSNP14465    | <i>Kabuli</i>    | <i>Ca_Kabuli_Scaffold1315</i>   | 115446                         | (C/A)       |
| 14466       | CakSNP14466    | <i>Kabuli</i>    | <i>Ca_Kabuli_Scaffold1315</i>   | 115481                         | (G/T)       |
| 14467       | CakSNP14467    | <i>Kabuli</i>    | <i>Ca_Kabuli_Scaffold132</i>    | 153364                         | (A/G)       |

| <b>S.N.</b> | <b>SNP IDs</b> | <b>Cultivars</b> | <b>Chromosomes/scaffolds</b>    | <b>Physical positions (bp)</b> | <b>SNPs</b> |
|-------------|----------------|------------------|---------------------------------|--------------------------------|-------------|
| 14468       | CakSNP14468    | <i>Kabuli</i>    | <i>Ca_Kabuli_Scaffold132</i>    | 153361                         | (A/G)       |
| 14469       | CakSNP14469    | <i>Kabuli</i>    | <i>Ca_Kabuli_Scaffold1324</i>   | 228151                         | (G/A)       |
| 14470       | CakSNP14470    | <i>Kabuli</i>    | <i>Ca_Kabuli_Scaffold1324</i>   | 228159                         | (A/C)       |
| 14471       | CakSNP14471    | <i>Kabuli</i>    | <i>Ca_Kabuli_Scaffold1324</i>   | 262208                         | (C/G)       |
| 14472       | CakSNP14472    | <i>Kabuli</i>    | <i>Ca_Kabuli_Scaffold134</i>    | 218290                         | (C/T)       |
| 14473       | CakSNP14473    | <i>Kabuli</i>    | <i>Ca_Kabuli_Scaffold134</i>    | 218352                         | (T/G)       |
| 14474       | CakSNP14474    | <i>Kabuli</i>    | <i>Ca_Kabuli_Scaffold134</i>    | 218336                         | (T/G)       |
| 14475       | CakSNP14475    | <i>Kabuli</i>    | <i>Ca_Kabuli_Scaffold134</i>    | 223318                         | (C/T)       |
| 14476       | CakSNP14476    | <i>Kabuli</i>    | <i>Ca_Kabuli_Scaffold134</i>    | 223303                         | (T/C)       |
| 14477       | CakSNP14477    | <i>Kabuli</i>    | <i>Ca_Kabuli_Scaffold134</i>    | 233007                         | (C/T)       |
| 14478       | CakSNP14478    | <i>Kabuli</i>    | <i>Ca_Kabuli_Scaffold134</i>    | 275661                         | (T/A)       |
| 14479       | CakSNP14479    | <i>Kabuli</i>    | <i>Ca_Kabuli_Scaffold1348_1</i> | 84644                          | (G/C)       |
| 14480       | CakSNP14480    | <i>Kabuli</i>    | <i>Ca_Kabuli_Scaffold1348_1</i> | 134575                         | (T/C)       |
| 14481       | CakSNP14481    | <i>Kabuli</i>    | <i>Ca_Kabuli_Scaffold1348_1</i> | 134572                         | (G/A)       |
| 14482       | CakSNP14482    | <i>Kabuli</i>    | <i>Ca_Kabuli_Scaffold1348_1</i> | 294458                         | (A/G)       |
| 14483       | CakSNP14483    | <i>Kabuli</i>    | <i>Ca_Kabuli_Scaffold1348_1</i> | 294456                         | (A/G)       |
| 14484       | CakSNP14484    | <i>Kabuli</i>    | <i>Ca_Kabuli_Scaffold1348_1</i> | 380156                         | (A/T)       |
| 14485       | CakSNP14485    | <i>Kabuli</i>    | <i>Ca_Kabuli_Scaffold1348_1</i> | 380225                         | (T/G)       |
| 14486       | CakSNP14486    | <i>Kabuli</i>    | <i>Ca_Kabuli_Scaffold1348_1</i> | 380227                         | (C/G)       |
| 14487       | CakSNP14487    | <i>Kabuli</i>    | <i>Ca_Kabuli_Scaffold1348_1</i> | 380244                         | (C/G)       |
| 14488       | CakSNP14488    | <i>Kabuli</i>    | <i>Ca_Kabuli_Scaffold1348_1</i> | 380289                         | (C/T)       |
| 14489       | CakSNP14489    | <i>Kabuli</i>    | <i>Ca_Kabuli_Scaffold1348_1</i> | 380336                         | (G/C)       |
| 14490       | CakSNP14490    | <i>Kabuli</i>    | <i>Ca_Kabuli_Scaffold1348_1</i> | 381026                         | (G/T)       |
| 14491       | CakSNP14491    | <i>Kabuli</i>    | <i>Ca_Kabuli_Scaffold1348_1</i> | 452011                         | (G/T)       |
| 14492       | CakSNP14492    | <i>Kabuli</i>    | <i>Ca_Kabuli_Scaffold1348_1</i> | 454342                         | (G/T)       |
| 14493       | CakSNP14493    | <i>Kabuli</i>    | <i>Ca_Kabuli_Scaffold1348_1</i> | 515602                         | (A/C)       |
| 14494       | CakSNP14494    | <i>Kabuli</i>    | <i>Ca_Kabuli_Scaffold1348_1</i> | 535984                         | (G/T)       |
| 14495       | CakSNP14495    | <i>Kabuli</i>    | <i>Ca_Kabuli_Scaffold1348_1</i> | 552192                         | (C/A)       |
| 14496       | CakSNP14496    | <i>Kabuli</i>    | <i>Ca_Kabuli_Scaffold1348_1</i> | 552299                         | (T/C)       |
| 14497       | CakSNP14497    | <i>Kabuli</i>    | <i>Ca_Kabuli_Scaffold1348_1</i> | 552342                         | (G/A)       |
| 14498       | CakSNP14498    | <i>Kabuli</i>    | <i>Ca_Kabuli_Scaffold1348_1</i> | 552328                         | (A/G)       |
| 14499       | CakSNP14499    | <i>Kabuli</i>    | <i>Ca_Kabuli_Scaffold1348_1</i> | 553863                         | (G/T)       |
| 14500       | CakSNP14500    | <i>Kabuli</i>    | <i>Ca_Kabuli_Scaffold1348_1</i> | 553978                         | (C/T)       |
| 14501       | CakSNP14501    | <i>Kabuli</i>    | <i>Ca_Kabuli_Scaffold1348_1</i> | 554003                         | (G/C)       |
| 14502       | CakSNP14502    | <i>Kabuli</i>    | <i>Ca_Kabuli_Scaffold1348_1</i> | 554134                         | (A/G)       |
| 14503       | CakSNP14503    | <i>Kabuli</i>    | <i>Ca_Kabuli_Scaffold1348_1</i> | 554215                         | (T/G)       |
| 14504       | CakSNP14504    | <i>Kabuli</i>    | <i>Ca_Kabuli_Scaffold1348_1</i> | 651906                         | (A/T)       |
| 14505       | CakSNP14505    | <i>Kabuli</i>    | <i>Ca_Kabuli_Scaffold1348_1</i> | 652067                         | (A/G)       |
| 14506       | CakSNP14506    | <i>Kabuli</i>    | <i>Ca_Kabuli_Scaffold1348_1</i> | 667541                         | (A/C)       |

| <b>S.N.</b> | <b>SNP IDs</b> | <b>Cultivars</b> | <b>Chromosomes/scaffolds</b>    | <b>Physical positions (bp)</b> | <b>SNPs</b> |
|-------------|----------------|------------------|---------------------------------|--------------------------------|-------------|
| 14507       | CakSNP14507    | <i>Kabuli</i>    | <i>Ca_Kabuli_Scaffold1348_1</i> | 667504                         | (C/T)       |
| 14508       | CakSNP14508    | <i>Kabuli</i>    | <i>Ca_Kabuli_Scaffold1348_1</i> | 679305                         | (T/C)       |
| 14509       | CakSNP14509    | <i>Kabuli</i>    | <i>Ca_Kabuli_Scaffold1348_1</i> | 680734                         | (G/T)       |
| 14510       | CakSNP14510    | <i>Kabuli</i>    | <i>Ca_Kabuli_Scaffold1348_1</i> | 680730                         | (C/T)       |
| 14511       | CakSNP14511    | <i>Kabuli</i>    | <i>Ca_Kabuli_Scaffold1348_1</i> | 680718                         | (A/T)       |
| 14512       | CakSNP14512    | <i>Kabuli</i>    | <i>Ca_Kabuli_Scaffold1348_1</i> | 708276                         | (G/A)       |
| 14513       | CakSNP14513    | <i>Kabuli</i>    | <i>Ca_Kabuli_Scaffold1348_1</i> | 708302                         | (G/T)       |
| 14514       | CakSNP14514    | <i>Kabuli</i>    | <i>Ca_Kabuli_Scaffold1348_1</i> | 708344                         | (G/A)       |
| 14515       | CakSNP14515    | <i>Kabuli</i>    | <i>Ca_Kabuli_Scaffold1348_1</i> | 732450                         | (A/C)       |
| 14516       | CakSNP14516    | <i>Kabuli</i>    | <i>Ca_Kabuli_Scaffold1348_1</i> | 732454                         | (T/G)       |
| 14517       | CakSNP14517    | <i>Kabuli</i>    | <i>Ca_Kabuli_Scaffold1348_1</i> | 732460                         | (T/A)       |
| 14518       | CakSNP14518    | <i>Kabuli</i>    | <i>Ca_Kabuli_Scaffold1348_1</i> | 732496                         | (G/T)       |
| 14519       | CakSNP14519    | <i>Kabuli</i>    | <i>Ca_Kabuli_Scaffold1348_1</i> | 735782                         | (C/T)       |
| 14520       | CakSNP14520    | <i>Kabuli</i>    | <i>Ca_Kabuli_Scaffold1348_1</i> | 735812                         | (G/A)       |
| 14521       | CakSNP14521    | <i>Kabuli</i>    | <i>Ca_Kabuli_Scaffold1348_1</i> | 750170                         | (C/A)       |
| 14522       | CakSNP14522    | <i>Kabuli</i>    | <i>Ca_Kabuli_Scaffold1348_1</i> | 750162                         | (T/C)       |
| 14523       | CakSNP14523    | <i>Kabuli</i>    | <i>Ca_Kabuli_Scaffold1348_1</i> | 750213                         | (C/A)       |
| 14524       | CakSNP14524    | <i>Kabuli</i>    | <i>Ca_Kabuli_Scaffold1348_1</i> | 771029                         | (T/A)       |
| 14525       | CakSNP14525    | <i>Kabuli</i>    | <i>Ca_Kabuli_Scaffold1348_1</i> | 871724                         | (G/A)       |
| 14526       | CakSNP14526    | <i>Kabuli</i>    | <i>Ca_Kabuli_Scaffold1348_1</i> | 909909                         | (A/G)       |
| 14527       | CakSNP14527    | <i>Kabuli</i>    | <i>Ca_Kabuli_Scaffold1348_1</i> | 909967                         | (C/G)       |
| 14528       | CakSNP14528    | <i>Kabuli</i>    | <i>Ca_Kabuli_Scaffold1348_1</i> | 909965                         | (T/A)       |
| 14529       | CakSNP14529    | <i>Kabuli</i>    | <i>Ca_Kabuli_Scaffold1348_1</i> | 909959                         | (A/C)       |
| 14530       | CakSNP14530    | <i>Kabuli</i>    | <i>Ca_Kabuli_Scaffold1348_1</i> | 924164                         | (T/G)       |
| 14531       | CakSNP14531    | <i>Kabuli</i>    | <i>Ca_Kabuli_Scaffold1348_1</i> | 934720                         | (C/A)       |
| 14532       | CakSNP14532    | <i>Kabuli</i>    | <i>Ca_Kabuli_Scaffold1348_1</i> | 934791                         | (C/T)       |
| 14533       | CakSNP14533    | <i>Kabuli</i>    | <i>Ca_Kabuli_Scaffold1348_1</i> | 950995                         | (A/G)       |
| 14534       | CakSNP14534    | <i>Kabuli</i>    | <i>Ca_Kabuli_Scaffold1348_1</i> | 959608                         | (A/C)       |
| 14535       | CakSNP14535    | <i>Kabuli</i>    | <i>Ca_Kabuli_Scaffold1348_1</i> | 959828                         | (G/A)       |
| 14536       | CakSNP14536    | <i>Kabuli</i>    | <i>Ca_Kabuli_Scaffold1348_1</i> | 959780                         | (G/A)       |
| 14537       | CakSNP14537    | <i>Kabuli</i>    | <i>Ca_Kabuli_Scaffold1348_1</i> | 970927                         | (A/G)       |
| 14538       | CakSNP14538    | <i>Kabuli</i>    | <i>Ca_Kabuli_Scaffold1348_1</i> | 981964                         | (T/C)       |
| 14539       | CakSNP14539    | <i>Kabuli</i>    | <i>Ca_Kabuli_Scaffold1348_1</i> | 983101                         | (T/G)       |
| 14540       | CakSNP14540    | <i>Kabuli</i>    | <i>Ca_Kabuli_Scaffold1348_1</i> | 1020258                        | (C/T)       |
| 14541       | CakSNP14541    | <i>Kabuli</i>    | <i>Ca_Kabuli_Scaffold1348_1</i> | 1023898                        | (G/A)       |
| 14542       | CakSNP14542    | <i>Kabuli</i>    | <i>Ca_Kabuli_Scaffold1348_1</i> | 1023923                        | (G/A)       |
| 14543       | CakSNP14543    | <i>Kabuli</i>    | <i>Ca_Kabuli_Scaffold1348_1</i> | 1023954                        | (G/C)       |
| 14544       | CakSNP14544    | <i>Kabuli</i>    | <i>Ca_Kabuli_Scaffold1348_1</i> | 1066818                        | (A/C)       |
| 14545       | CakSNP14545    | <i>Kabuli</i>    | <i>Ca_Kabuli_Scaffold1348_1</i> | 1066783                        | (C/T)       |

| <b>S.N.</b> | <b>SNP IDs</b> | <b>Cultivars</b> | <b>Chromosomes/scaffolds</b>    | <b>Physical positions (bp)</b> | <b>SNPs</b> |
|-------------|----------------|------------------|---------------------------------|--------------------------------|-------------|
| 14546       | CakSNP14546    | <i>Kabuli</i>    | <i>Ca_Kabuli_Scaffold1348_1</i> | 1066776                        | (T/C)       |
| 14547       | CakSNP14547    | <i>Kabuli</i>    | <i>Ca_Kabuli_Scaffold1348_1</i> | 1072750                        | (C/T)       |
| 14548       | CakSNP14548    | <i>Kabuli</i>    | <i>Ca_Kabuli_Scaffold1348_1</i> | 1145082                        | (A/C)       |
| 14549       | CakSNP14549    | <i>Kabuli</i>    | <i>Ca_Kabuli_Scaffold1348_1</i> | 1145124                        | (T/C)       |
| 14550       | CakSNP14550    | <i>Kabuli</i>    | <i>Ca_Kabuli_Scaffold1348_1</i> | 1207442                        | (G/A)       |
| 14551       | CakSNP14551    | <i>Kabuli</i>    | <i>Ca_Kabuli_Scaffold1348_1</i> | 1236956                        | (A/G)       |
| 14552       | CakSNP14552    | <i>Kabuli</i>    | <i>Ca_Kabuli_Scaffold1348_1</i> | 1263560                        | (T/G)       |
| 14553       | CakSNP14553    | <i>Kabuli</i>    | <i>Ca_Kabuli_Scaffold1348_1</i> | 1265627                        | (T/C)       |
| 14554       | CakSNP14554    | <i>Kabuli</i>    | <i>Ca_Kabuli_Scaffold1348_1</i> | 1265635                        | (T/G)       |
| 14555       | CakSNP14555    | <i>Kabuli</i>    | <i>Ca_Kabuli_Scaffold1348_1</i> | 1273341                        | (G/A)       |
| 14556       | CakSNP14556    | <i>Kabuli</i>    | <i>Ca_Kabuli_Scaffold1348_1</i> | 1273388                        | (G/A)       |
| 14557       | CakSNP14557    | <i>Kabuli</i>    | <i>Ca_Kabuli_Scaffold1348_1</i> | 1288448                        | (A/G)       |
| 14558       | CakSNP14558    | <i>Kabuli</i>    | <i>Ca_Kabuli_Scaffold1348_1</i> | 1294675                        | (A/T)       |
| 14559       | CakSNP14559    | <i>Kabuli</i>    | <i>Ca_Kabuli_Scaffold1348_1</i> | 1296453                        | (G/A)       |
| 14560       | CakSNP14560    | <i>Kabuli</i>    | <i>Ca_Kabuli_Scaffold1348_1</i> | 1330256                        | (A/G)       |
| 14561       | CakSNP14561    | <i>Kabuli</i>    | <i>Ca_Kabuli_Scaffold1348_1</i> | 1330288                        | (A/G)       |
| 14562       | CakSNP14562    | <i>Kabuli</i>    | <i>Ca_Kabuli_Scaffold1348_1</i> | 1330400                        | (A/G)       |
| 14563       | CakSNP14563    | <i>Kabuli</i>    | <i>Ca_Kabuli_Scaffold1348_1</i> | 1346914                        | (G/T)       |
| 14564       | CakSNP14564    | <i>Kabuli</i>    | <i>Ca_Kabuli_Scaffold1348_1</i> | 1346943                        | (G/A)       |
| 14565       | CakSNP14565    | <i>Kabuli</i>    | <i>Ca_Kabuli_Scaffold1348_1</i> | 1372535                        | (G/A)       |
| 14566       | CakSNP14566    | <i>Kabuli</i>    | <i>Ca_Kabuli_Scaffold1348_1</i> | 1403452                        | (G/A)       |
| 14567       | CakSNP14567    | <i>Kabuli</i>    | <i>Ca_Kabuli_Scaffold1348_1</i> | 1403480                        | (A/G)       |
| 14568       | CakSNP14568    | <i>Kabuli</i>    | <i>Ca_Kabuli_Scaffold1351</i>   | 172111                         | (G/A)       |
| 14569       | CakSNP14569    | <i>Kabuli</i>    | <i>Ca_Kabuli_Scaffold1351</i>   | 172110                         | (T/C)       |
| 14570       | CakSNP14570    | <i>Kabuli</i>    | <i>Ca_Kabuli_Scaffold1351</i>   | 177159                         | (G/A)       |
| 14571       | CakSNP14571    | <i>Kabuli</i>    | <i>Ca_Kabuli_Scaffold1351</i>   | 177172                         | (G/A)       |
| 14572       | CakSNP14572    | <i>Kabuli</i>    | <i>Ca_Kabuli_Scaffold1351</i>   | 177178                         | (T/C)       |
| 14573       | CakSNP14573    | <i>Kabuli</i>    | <i>Ca_Kabuli_Scaffold1351</i>   | 177181                         | (A/G)       |
| 14574       | CakSNP14574    | <i>Kabuli</i>    | <i>Ca_Kabuli_Scaffold1351</i>   | 177194                         | (G/A)       |
| 14575       | CakSNP14575    | <i>Kabuli</i>    | <i>Ca_Kabuli_Scaffold1351</i>   | 177202                         | (G/A)       |
| 14576       | CakSNP14576    | <i>Kabuli</i>    | <i>Ca_Kabuli_Scaffold1351</i>   | 177171                         | (T/G)       |
| 14577       | CakSNP14577    | <i>Kabuli</i>    | <i>Ca_Kabuli_Scaffold1351</i>   | 177193                         | (T/C)       |
| 14578       | CakSNP14578    | <i>Kabuli</i>    | <i>Ca_Kabuli_Scaffold1351</i>   | 177256                         | (T/G)       |
| 14579       | CakSNP14579    | <i>Kabuli</i>    | <i>Ca_Kabuli_Scaffold1351</i>   | 177248                         | (G/T)       |
| 14580       | CakSNP14580    | <i>Kabuli</i>    | <i>Ca_Kabuli_Scaffold1351</i>   | 177247                         | (G/A)       |
| 14581       | CakSNP14581    | <i>Kabuli</i>    | <i>Ca_Kabuli_Scaffold1351</i>   | 177242                         | (G/A)       |
| 14582       | CakSNP14582    | <i>Kabuli</i>    | <i>Ca_Kabuli_Scaffold1351</i>   | 177241                         | (T/G)       |
| 14583       | CakSNP14583    | <i>Kabuli</i>    | <i>Ca_Kabuli_Scaffold1351</i>   | 177240                         | (C/A)       |
| 14584       | CakSNP14584    | <i>Kabuli</i>    | <i>Ca_Kabuli_Scaffold1351</i>   | 177235                         | (G/T)       |

| <b>S.N.</b> | <b>SNP IDs</b> | <b>Cultivars</b> | <b>Chromosomes/scaffolds</b>  | <b>Physical positions (bp)</b> | <b>SNPs</b> |
|-------------|----------------|------------------|-------------------------------|--------------------------------|-------------|
| 14585       | CakSNP14585    | <i>Kabuli</i>    | <i>Ca_Kabuli_Scaffold1351</i> | 177234                         | (A/C)       |
| 14586       | CakSNP14586    | <i>Kabuli</i>    | <i>Ca_Kabuli_Scaffold1351</i> | 177210                         | (T/A)       |
| 14587       | CakSNP14587    | <i>Kabuli</i>    | <i>Ca_Kabuli_Scaffold1351</i> | 177200                         | (T/G)       |
| 14588       | CakSNP14588    | <i>Kabuli</i>    | <i>Ca_Kabuli_Scaffold1351</i> | 177191                         | (C/T)       |
| 14589       | CakSNP14589    | <i>Kabuli</i>    | <i>Ca_Kabuli_Scaffold1351</i> | 177188                         | (G/T)       |
| 14590       | CakSNP14590    | <i>Kabuli</i>    | <i>Ca_Kabuli_Scaffold1351</i> | 204656                         | (C/A)       |
| 14591       | CakSNP14591    | <i>Kabuli</i>    | <i>Ca_Kabuli_Scaffold1351</i> | 335227                         | (T/C)       |
| 14592       | CakSNP14592    | <i>Kabuli</i>    | <i>Ca_Kabuli_Scaffold1351</i> | 335239                         | (G/T)       |
| 14593       | CakSNP14593    | <i>Kabuli</i>    | <i>Ca_Kabuli_Scaffold1351</i> | 367576                         | (A/G)       |
| 14594       | CakSNP14594    | <i>Kabuli</i>    | <i>Ca_Kabuli_Scaffold1351</i> | 367578                         | (G/A)       |
| 14595       | CakSNP14595    | <i>Kabuli</i>    | <i>Ca_Kabuli_Scaffold1351</i> | 367745                         | (G/A)       |
| 14596       | CakSNP14596    | <i>Kabuli</i>    | <i>Ca_Kabuli_Scaffold1369</i> | 8015                           | (T/A)       |
| 14597       | CakSNP14597    | <i>Kabuli</i>    | <i>Ca_Kabuli_Scaffold1369</i> | 8115                           | (T/G)       |
| 14598       | CakSNP14598    | <i>Kabuli</i>    | <i>Ca_Kabuli_Scaffold1369</i> | 8154                           | (T/G)       |
| 14599       | CakSNP14599    | <i>Kabuli</i>    | <i>Ca_Kabuli_Scaffold1369</i> | 8221                           | (T/G)       |
| 14600       | CakSNP14600    | <i>Kabuli</i>    | <i>Ca_Kabuli_Scaffold1369</i> | 8327                           | (G/A)       |
| 14601       | CakSNP14601    | <i>Kabuli</i>    | <i>Ca_Kabuli_Scaffold1369</i> | 31000                          | (A/G)       |
| 14602       | CakSNP14602    | <i>Kabuli</i>    | <i>Ca_Kabuli_Scaffold1390</i> | 98354                          | (A/G)       |
| 14603       | CakSNP14603    | <i>Kabuli</i>    | <i>Ca_Kabuli_Scaffold1401</i> | 89077                          | (T/C)       |
| 14604       | CakSNP14604    | <i>Kabuli</i>    | <i>Ca_Kabuli_Scaffold1401</i> | 89074                          | (T/C)       |
| 14605       | CakSNP14605    | <i>Kabuli</i>    | <i>Ca_Kabuli_Scaffold1417</i> | 4863                           | (A/G)       |
| 14606       | CakSNP14606    | <i>Kabuli</i>    | <i>Ca_Kabuli_Scaffold1417</i> | 4906                           | (G/A)       |
| 14607       | CakSNP14607    | <i>Kabuli</i>    | <i>Ca_Kabuli_Scaffold1417</i> | 4917                           | (G/T)       |
| 14608       | CakSNP14608    | <i>Kabuli</i>    | <i>Ca_Kabuli_Scaffold1417</i> | 76627                          | (A/C)       |
| 14609       | CakSNP14609    | <i>Kabuli</i>    | <i>Ca_Kabuli_Scaffold1417</i> | 230210                         | (T/G)       |
| 14610       | CakSNP14610    | <i>Kabuli</i>    | <i>Ca_Kabuli_Scaffold1419</i> | 24845                          | (C/T)       |
| 14611       | CakSNP14611    | <i>Kabuli</i>    | <i>Ca_Kabuli_Scaffold143</i>  | 18492                          | (A/G)       |
| 14612       | CakSNP14612    | <i>Kabuli</i>    | <i>Ca_Kabuli_Scaffold1439</i> | 242972                         | (A/G)       |
| 14613       | CakSNP14613    | <i>Kabuli</i>    | <i>Ca_Kabuli_Scaffold1448</i> | 47306                          | (A/G)       |
| 14614       | CakSNP14614    | <i>Kabuli</i>    | <i>Ca_Kabuli_Scaffold1448</i> | 74436                          | (C/T)       |
| 14615       | CakSNP14615    | <i>Kabuli</i>    | <i>Ca_Kabuli_Scaffold1448</i> | 74434                          | (C/T)       |
| 14616       | CakSNP14616    | <i>Kabuli</i>    | <i>Ca_Kabuli_Scaffold1448</i> | 74529                          | (C/T)       |
| 14617       | CakSNP14617    | <i>Kabuli</i>    | <i>Ca_Kabuli_Scaffold1448</i> | 76809                          | (G/A)       |
| 14618       | CakSNP14618    | <i>Kabuli</i>    | <i>Ca_Kabuli_Scaffold1449</i> | 55474                          | (T/G)       |
| 14619       | CakSNP14619    | <i>Kabuli</i>    | <i>Ca_Kabuli_Scaffold1449</i> | 55529                          | (G/A)       |
| 14620       | CakSNP14620    | <i>Kabuli</i>    | <i>Ca_Kabuli_Scaffold1449</i> | 55532                          | (G/A)       |
| 14621       | CakSNP14621    | <i>Kabuli</i>    | <i>Ca_Kabuli_Scaffold1452</i> | 3501                           | (C/A)       |
| 14622       | CakSNP14622    | <i>Kabuli</i>    | <i>Ca_Kabuli_Scaffold1452</i> | 3496                           | (A/T)       |
| 14623       | CakSNP14623    | <i>Kabuli</i>    | <i>Ca_Kabuli_Scaffold1452</i> | 3495                           | (C/A)       |



| <b>S.N.</b> | <b>SNP IDs</b> | <b>Cultivars</b> | <b>Chromosomes/scaffolds</b>  | <b>Physical positions (bp)</b> | <b>SNPs</b> |
|-------------|----------------|------------------|-------------------------------|--------------------------------|-------------|
| 14624       | CakSNP14624    | <i>Kabuli</i>    | <i>Ca_Kabuli_Scaffold1452</i> | 3737                           | (C/A)       |
| 14625       | CakSNP14625    | <i>Kabuli</i>    | <i>Ca_Kabuli_Scaffold1462</i> | 1556                           | (T/G)       |
| 14626       | CakSNP14626    | <i>Kabuli</i>    | <i>Ca_Kabuli_Scaffold1466</i> | 90846                          | (C/A)       |
| 14627       | CakSNP14627    | <i>Kabuli</i>    | <i>Ca_Kabuli_Scaffold1466</i> | 165472                         | (C/T)       |
| 14628       | CakSNP14628    | <i>Kabuli</i>    | <i>Ca_Kabuli_Scaffold1466</i> | 322287                         | (G/A)       |
| 14629       | CakSNP14629    | <i>Kabuli</i>    | <i>Ca_Kabuli_Scaffold1466</i> | 322315                         | (G/T)       |
| 14630       | CakSNP14630    | <i>Kabuli</i>    | <i>Ca_Kabuli_Scaffold1466</i> | 322450                         | (G/T)       |
| 14631       | CakSNP14631    | <i>Kabuli</i>    | <i>Ca_Kabuli_Scaffold1466</i> | 322448                         | (T/G)       |
| 14632       | CakSNP14632    | <i>Kabuli</i>    | <i>Ca_Kabuli_Scaffold1466</i> | 322421                         | (C/T)       |
| 14633       | CakSNP14633    | <i>Kabuli</i>    | <i>Ca_Kabuli_Scaffold1466</i> | 322415                         | (G/A)       |
| 14634       | CakSNP14634    | <i>Kabuli</i>    | <i>Ca_Kabuli_Scaffold1466</i> | 322414                         | (G/A)       |
| 14635       | CakSNP14635    | <i>Kabuli</i>    | <i>Ca_Kabuli_Scaffold1466</i> | 322400                         | (C/T)       |
| 14636       | CakSNP14636    | <i>Kabuli</i>    | <i>Ca_Kabuli_Scaffold1466</i> | 322390                         | (G/A)       |
| 14637       | CakSNP14637    | <i>Kabuli</i>    | <i>Ca_Kabuli_Scaffold1466</i> | 322383                         | (C/T)       |
| 14638       | CakSNP14638    | <i>Kabuli</i>    | <i>Ca_Kabuli_Scaffold1467</i> | 205779                         | (A/G)       |
| 14639       | CakSNP14639    | <i>Kabuli</i>    | <i>Ca_Kabuli_Scaffold1467</i> | 205803                         | (C/T)       |
| 14640       | CakSNP14640    | <i>Kabuli</i>    | <i>Ca_Kabuli_Scaffold1467</i> | 205833                         | (G/A)       |
| 14641       | CakSNP14641    | <i>Kabuli</i>    | <i>Ca_Kabuli_Scaffold1467</i> | 205840                         | (G/A)       |
| 14642       | CakSNP14642    | <i>Kabuli</i>    | <i>Ca_Kabuli_Scaffold1467</i> | 205845                         | (A/G)       |
| 14643       | CakSNP14643    | <i>Kabuli</i>    | <i>Ca_Kabuli_Scaffold1467</i> | 206121                         | (G/A)       |
| 14644       | CakSNP14644    | <i>Kabuli</i>    | <i>Ca_Kabuli_Scaffold1467</i> | 206118                         | (C/T)       |
| 14645       | CakSNP14645    | <i>Kabuli</i>    | <i>Ca_Kabuli_Scaffold1467</i> | 206100                         | (G/A)       |
| 14646       | CakSNP14646    | <i>Kabuli</i>    | <i>Ca_Kabuli_Scaffold1467</i> | 206094                         | (T/C)       |
| 14647       | CakSNP14647    | <i>Kabuli</i>    | <i>Ca_Kabuli_Scaffold1467</i> | 206085                         | (T/C)       |
| 14648       | CakSNP14648    | <i>Kabuli</i>    | <i>Ca_Kabuli_Scaffold1467</i> | 206068                         | (A/G)       |
| 14649       | CakSNP14649    | <i>Kabuli</i>    | <i>Ca_Kabuli_Scaffold1467</i> | 206067                         | (T/G)       |
| 14650       | CakSNP14650    | <i>Kabuli</i>    | <i>Ca_Kabuli_Scaffold1475</i> | 4820                           | (G/A)       |
| 14651       | CakSNP14651    | <i>Kabuli</i>    | <i>Ca_Kabuli_Scaffold1475</i> | 4796                           | (C/T)       |
| 14652       | CakSNP14652    | <i>Kabuli</i>    | <i>Ca_Kabuli_Scaffold1475</i> | 4794                           | (C/A)       |
| 14653       | CakSNP14653    | <i>Kabuli</i>    | <i>Ca_Kabuli_Scaffold1475</i> | 4755                           | (T/A)       |
| 14654       | CakSNP14654    | <i>Kabuli</i>    | <i>Ca_Kabuli_Scaffold1475</i> | 4754                           | (C/T)       |
| 14655       | CakSNP14655    | <i>Kabuli</i>    | <i>Ca_Kabuli_Scaffold1475</i> | 4749                           | (C/T)       |
| 14656       | CakSNP14656    | <i>Kabuli</i>    | <i>Ca_Kabuli_Scaffold1475</i> | 4873                           | (G/T)       |
| 14657       | CakSNP14657    | <i>Kabuli</i>    | <i>Ca_Kabuli_Scaffold1475</i> | 4845                           | (A/T)       |
| 14658       | CakSNP14658    | <i>Kabuli</i>    | <i>Ca_Kabuli_Scaffold1475</i> | 4833                           | (G/A)       |
| 14659       | CakSNP14659    | <i>Kabuli</i>    | <i>Ca_Kabuli_Scaffold1475</i> | 4818                           | (C/T)       |
| 14660       | CakSNP14660    | <i>Kabuli</i>    | <i>Ca_Kabuli_Scaffold1483</i> | 56686                          | (A/T)       |
| 14661       | CakSNP14661    | <i>Kabuli</i>    | <i>Ca_Kabuli_Scaffold1483</i> | 56721                          | (G/C)       |
| 14662       | CakSNP14662    | <i>Kabuli</i>    | <i>Ca_Kabuli_Scaffold1493</i> | 81740                          | (C/T)       |

| <b>S.N.</b> | <b>SNP IDs</b> | <b>Cultivars</b> | <b>Chromosomes/scaffolds</b>  | <b>Physical positions (bp)</b> | <b>SNPs</b> |
|-------------|----------------|------------------|-------------------------------|--------------------------------|-------------|
| 14663       | CakSNP14663    | <i>Kabuli</i>    | <i>Ca_Kabuli_Scaffold1493</i> | 81784                          | (C/A)       |
| 14664       | CakSNP14664    | <i>Kabuli</i>    | <i>Ca_Kabuli_Scaffold1493</i> | 81789                          | (G/A)       |
| 14665       | CakSNP14665    | <i>Kabuli</i>    | <i>Ca_Kabuli_Scaffold1496</i> | 289997                         | (G/T)       |
| 14666       | CakSNP14666    | <i>Kabuli</i>    | <i>Ca_Kabuli_Scaffold1496</i> | 290018                         | (C/A)       |
| 14667       | CakSNP14667    | <i>Kabuli</i>    | <i>Ca_Kabuli_Scaffold1498</i> | 3474                           | (A/C)       |
| 14668       | CakSNP14668    | <i>Kabuli</i>    | <i>Ca_Kabuli_Scaffold1498</i> | 3657                           | (C/T)       |
| 14669       | CakSNP14669    | <i>Kabuli</i>    | <i>Ca_Kabuli_Scaffold1498</i> | 3641                           | (T/C)       |
| 14670       | CakSNP14670    | <i>Kabuli</i>    | <i>Ca_Kabuli_Scaffold1504</i> | 160623                         | (G/T)       |
| 14671       | CakSNP14671    | <i>Kabuli</i>    | <i>Ca_Kabuli_Scaffold1504</i> | 189700                         | (A/G)       |
| 14672       | CakSNP14672    | <i>Kabuli</i>    | <i>Ca_Kabuli_Scaffold1504</i> | 189699                         | (C/T)       |
| 14673       | CakSNP14673    | <i>Kabuli</i>    | <i>Ca_Kabuli_Scaffold1504</i> | 189681                         | (C/T)       |
| 14674       | CakSNP14674    | <i>Kabuli</i>    | <i>Ca_Kabuli_Scaffold1504</i> | 189664                         | (G/A)       |
| 14675       | CakSNP14675    | <i>Kabuli</i>    | <i>Ca_Kabuli_Scaffold1504</i> | 189663                         | (G/A)       |
| 14676       | CakSNP14676    | <i>Kabuli</i>    | <i>Ca_Kabuli_Scaffold1504</i> | 197789                         | (G/A)       |
| 14677       | CakSNP14677    | <i>Kabuli</i>    | <i>Ca_Kabuli_Scaffold1504</i> | 197790                         | (G/A)       |
| 14678       | CakSNP14678    | <i>Kabuli</i>    | <i>Ca_Kabuli_Scaffold1504</i> | 197819                         | (T/G)       |
| 14679       | CakSNP14679    | <i>Kabuli</i>    | <i>Ca_Kabuli_Scaffold1505</i> | 33297                          | (A/C)       |
| 14680       | CakSNP14680    | <i>Kabuli</i>    | <i>Ca_Kabuli_Scaffold151</i>  | 267060                         | (T/G)       |
| 14681       | CakSNP14681    | <i>Kabuli</i>    | <i>Ca_Kabuli_Scaffold151</i>  | 275743                         | (T/A)       |
| 14682       | CakSNP14682    | <i>Kabuli</i>    | <i>Ca_Kabuli_Scaffold1521</i> | 20734                          | (C/A)       |
| 14683       | CakSNP14683    | <i>Kabuli</i>    | <i>Ca_Kabuli_Scaffold1521</i> | 20779                          | (T/C)       |
| 14684       | CakSNP14684    | <i>Kabuli</i>    | <i>Ca_Kabuli_Scaffold1521</i> | 20851                          | (C/T)       |
| 14685       | CakSNP14685    | <i>Kabuli</i>    | <i>Ca_Kabuli_Scaffold1545</i> | 111476                         | (G/A)       |
| 14686       | CakSNP14686    | <i>Kabuli</i>    | <i>Ca_Kabuli_Scaffold1545</i> | 113148                         | (T/C)       |
| 14687       | CakSNP14687    | <i>Kabuli</i>    | <i>Ca_Kabuli_Scaffold1553</i> | 5078                           | (G/A)       |
| 14688       | CakSNP14688    | <i>Kabuli</i>    | <i>Ca_Kabuli_Scaffold1553</i> | 5115                           | (C/T)       |
| 14689       | CakSNP14689    | <i>Kabuli</i>    | <i>Ca_Kabuli_Scaffold1553</i> | 5125                           | (A/G)       |
| 14690       | CakSNP14690    | <i>Kabuli</i>    | <i>Ca_Kabuli_Scaffold157</i>  | 100228                         | (A/G)       |
| 14691       | CakSNP14691    | <i>Kabuli</i>    | <i>Ca_Kabuli_Scaffold157</i>  | 100529                         | (T/C)       |
| 14692       | CakSNP14692    | <i>Kabuli</i>    | <i>Ca_Kabuli_Scaffold157</i>  | 102779                         | (C/T)       |
| 14693       | CakSNP14693    | <i>Kabuli</i>    | <i>Ca_Kabuli_Scaffold157</i>  | 106331                         | (G/A)       |
| 14694       | CakSNP14694    | <i>Kabuli</i>    | <i>Ca_Kabuli_Scaffold157</i>  | 106349                         | (C/T)       |
| 14695       | CakSNP14695    | <i>Kabuli</i>    | <i>Ca_Kabuli_Scaffold157</i>  | 133602                         | (A/G)       |
| 14696       | CakSNP14696    | <i>Kabuli</i>    | <i>Ca_Kabuli_Scaffold157</i>  | 133583                         | (T/G)       |
| 14697       | CakSNP14697    | <i>Kabuli</i>    | <i>Ca_Kabuli_Scaffold157</i>  | 141880                         | (A/G)       |
| 14698       | CakSNP14698    | <i>Kabuli</i>    | <i>Ca_Kabuli_Scaffold157</i>  | 142444                         | (A/T)       |
| 14699       | CakSNP14699    | <i>Kabuli</i>    | <i>Ca_Kabuli_Scaffold157</i>  | 142455                         | (T/C)       |
| 14700       | CakSNP14700    | <i>Kabuli</i>    | <i>Ca_Kabuli_Scaffold157</i>  | 142470                         | (G/T)       |
| 14701       | CakSNP14701    | <i>Kabuli</i>    | <i>Ca_Kabuli_Scaffold157</i>  | 151081                         | (G/A)       |

| <b>S.N.</b> | <b>SNP IDs</b> | <b>Cultivars</b> | <b>Chromosomes/scaffolds</b>  | <b>Physical positions (bp)</b> | <b>SNPs</b> |
|-------------|----------------|------------------|-------------------------------|--------------------------------|-------------|
| 14702       | CakSNP14702    | <i>Kabuli</i>    | <i>Ca_Kabuli_Scaffold157</i>  | 151199                         | (T/A)       |
| 14703       | CakSNP14703    | <i>Kabuli</i>    | <i>Ca_Kabuli_Scaffold157</i>  | 151192                         | (T/C)       |
| 14704       | CakSNP14704    | <i>Kabuli</i>    | <i>Ca_Kabuli_Scaffold157</i>  | 151177                         | (A/G)       |
| 14705       | CakSNP14705    | <i>Kabuli</i>    | <i>Ca_Kabuli_Scaffold157</i>  | 151131                         | (T/A)       |
| 14706       | CakSNP14706    | <i>Kabuli</i>    | <i>Ca_Kabuli_Scaffold157</i>  | 213380                         | (C/G)       |
| 14707       | CakSNP14707    | <i>Kabuli</i>    | <i>Ca_Kabuli_Scaffold157</i>  | 213398                         | (T/G)       |
| 14708       | CakSNP14708    | <i>Kabuli</i>    | <i>Ca_Kabuli_Scaffold157</i>  | 213404                         | (T/G)       |
| 14709       | CakSNP14709    | <i>Kabuli</i>    | <i>Ca_Kabuli_Scaffold157</i>  | 213518                         | (T/C)       |
| 14710       | CakSNP14710    | <i>Kabuli</i>    | <i>Ca_Kabuli_Scaffold157</i>  | 213487                         | (G/C)       |
| 14711       | CakSNP14711    | <i>Kabuli</i>    | <i>Ca_Kabuli_Scaffold157</i>  | 213477                         | (G/A)       |
| 14712       | CakSNP14712    | <i>Kabuli</i>    | <i>Ca_Kabuli_Scaffold157</i>  | 229917                         | (G/A)       |
| 14713       | CakSNP14713    | <i>Kabuli</i>    | <i>Ca_Kabuli_Scaffold157</i>  | 229900                         | (G/A)       |
| 14714       | CakSNP14714    | <i>Kabuli</i>    | <i>Ca_Kabuli_Scaffold157</i>  | 321386                         | (C/T)       |
| 14715       | CakSNP14715    | <i>Kabuli</i>    | <i>Ca_Kabuli_Scaffold157</i>  | 326434                         | (A/G)       |
| 14716       | CakSNP14716    | <i>Kabuli</i>    | <i>Ca_Kabuli_Scaffold157</i>  | 326467                         | (C/T)       |
| 14717       | CakSNP14717    | <i>Kabuli</i>    | <i>Ca_Kabuli_Scaffold157</i>  | 326494                         | (A/G)       |
| 14718       | CakSNP14718    | <i>Kabuli</i>    | <i>Ca_Kabuli_Scaffold157</i>  | 326497                         | (A/G)       |
| 14719       | CakSNP14719    | <i>Kabuli</i>    | <i>Ca_Kabuli_Scaffold157</i>  | 352687                         | (C/T)       |
| 14720       | CakSNP14720    | <i>Kabuli</i>    | <i>Ca_Kabuli_Scaffold157</i>  | 352712                         | (G/A)       |
| 14721       | CakSNP14721    | <i>Kabuli</i>    | <i>Ca_Kabuli_Scaffold157</i>  | 352747                         | (T/C)       |
| 14722       | CakSNP14722    | <i>Kabuli</i>    | <i>Ca_Kabuli_Scaffold157</i>  | 355222                         | (G/A)       |
| 14723       | CakSNP14723    | <i>Kabuli</i>    | <i>Ca_Kabuli_Scaffold157</i>  | 469198                         | (A/C)       |
| 14724       | CakSNP14724    | <i>Kabuli</i>    | <i>Ca_Kabuli_Scaffold157</i>  | 535057                         | (T/G)       |
| 14725       | CakSNP14725    | <i>Kabuli</i>    | <i>Ca_Kabuli_Scaffold1575</i> | 2230                           | (C/T)       |
| 14726       | CakSNP14726    | <i>Kabuli</i>    | <i>Ca_Kabuli_Scaffold1580</i> | 71861                          | (G/T)       |
| 14727       | CakSNP14727    | <i>Kabuli</i>    | <i>Ca_Kabuli_Scaffold1580</i> | 119410                         | (T/C)       |
| 14728       | CakSNP14728    | <i>Kabuli</i>    | <i>Ca_Kabuli_Scaffold1580</i> | 119678                         | (T/C)       |
| 14729       | CakSNP14729    | <i>Kabuli</i>    | <i>Ca_Kabuli_Scaffold1580</i> | 163148                         | (A/T)       |
| 14730       | CakSNP14730    | <i>Kabuli</i>    | <i>Ca_Kabuli_Scaffold1580</i> | 163194                         | (T/C)       |
| 14731       | CakSNP14731    | <i>Kabuli</i>    | <i>Ca_Kabuli_Scaffold1580</i> | 380649                         | (A/T)       |
| 14732       | CakSNP14732    | <i>Kabuli</i>    | <i>Ca_Kabuli_Scaffold1585</i> | 59010                          | (C/A)       |
| 14733       | CakSNP14733    | <i>Kabuli</i>    | <i>Ca_Kabuli_Scaffold1603</i> | 11828                          | (C/G)       |
| 14734       | CakSNP14734    | <i>Kabuli</i>    | <i>Ca_Kabuli_Scaffold1607</i> | 107222                         | (T/C)       |
| 14735       | CakSNP14735    | <i>Kabuli</i>    | <i>Ca_Kabuli_Scaffold1613</i> | 48917                          | (T/G)       |
| 14736       | CakSNP14736    | <i>Kabuli</i>    | <i>Ca_Kabuli_Scaffold1613</i> | 107664                         | (T/A)       |
| 14737       | CakSNP14737    | <i>Kabuli</i>    | <i>Ca_Kabuli_Scaffold1613</i> | 107750                         | (T/A)       |
| 14738       | CakSNP14738    | <i>Kabuli</i>    | <i>Ca_Kabuli_Scaffold1631</i> | 202418                         | (A/G)       |
| 14739       | CakSNP14739    | <i>Kabuli</i>    | <i>Ca_Kabuli_Scaffold1635</i> | 83227                          | (G/C)       |
| 14740       | CakSNP14740    | <i>Kabuli</i>    | <i>Ca_Kabuli_Scaffold1635</i> | 83345                          | (A/T)       |

| <b>S.N.</b> | <b>SNP IDs</b> | <b>Cultivars</b> | <b>Chromosomes/scaffolds</b>  | <b>Physical positions (bp)</b> | <b>SNPs</b> |
|-------------|----------------|------------------|-------------------------------|--------------------------------|-------------|
| 14741       | CakSNP14741    | <i>Kabuli</i>    | <i>Ca_Kabuli_Scaffold1654</i> | 26432                          | (G/A)       |
| 14742       | CakSNP14742    | <i>Kabuli</i>    | <i>Ca_Kabuli_Scaffold1659</i> | 303945                         | (T/G)       |
| 14743       | CakSNP14743    | <i>Kabuli</i>    | <i>Ca_Kabuli_Scaffold1661</i> | 70434                          | (A/G)       |
| 14744       | CakSNP14744    | <i>Kabuli</i>    | <i>Ca_Kabuli_Scaffold1664</i> | 94989                          | (G/A)       |
| 14745       | CakSNP14745    | <i>Kabuli</i>    | <i>Ca_Kabuli_Scaffold1664</i> | 94984                          | (A/T)       |
| 14746       | CakSNP14746    | <i>Kabuli</i>    | <i>Ca_Kabuli_Scaffold1664</i> | 94930                          | (G/C)       |
| 14747       | CakSNP14747    | <i>Kabuli</i>    | <i>Ca_Kabuli_Scaffold167</i>  | 11018                          | (T/A)       |
| 14748       | CakSNP14748    | <i>Kabuli</i>    | <i>Ca_Kabuli_Scaffold167</i>  | 11009                          | (A/T)       |
| 14749       | CakSNP14749    | <i>Kabuli</i>    | <i>Ca_Kabuli_Scaffold167</i>  | 137869                         | (C/T)       |
| 14750       | CakSNP14750    | <i>Kabuli</i>    | <i>Ca_Kabuli_Scaffold167</i>  | 137848                         | (A/G)       |
| 14751       | CakSNP14751    | <i>Kabuli</i>    | <i>Ca_Kabuli_Scaffold167</i>  | 239687                         | (G/A)       |
| 14752       | CakSNP14752    | <i>Kabuli</i>    | <i>Ca_Kabuli_Scaffold167</i>  | 327829                         | (T/C)       |
| 14753       | CakSNP14753    | <i>Kabuli</i>    | <i>Ca_Kabuli_Scaffold1687</i> | 82935                          | (A/C)       |
| 14754       | CakSNP14754    | <i>Kabuli</i>    | <i>Ca_Kabuli_Scaffold1699</i> | 27556                          | (A/C)       |
| 14755       | CakSNP14755    | <i>Kabuli</i>    | <i>Ca_Kabuli_Scaffold1699</i> | 27607                          | (T/G)       |
| 14756       | CakSNP14756    | <i>Kabuli</i>    | <i>Ca_Kabuli_Scaffold1708</i> | 69664                          | (A/T)       |
| 14757       | CakSNP14757    | <i>Kabuli</i>    | <i>Ca_Kabuli_Scaffold171</i>  | 96763                          | (T/C)       |
| 14758       | CakSNP14758    | <i>Kabuli</i>    | <i>Ca_Kabuli_Scaffold171</i>  | 183718                         | (T/C)       |
| 14759       | CakSNP14759    | <i>Kabuli</i>    | <i>Ca_Kabuli_Scaffold171</i>  | 183720                         | (C/T)       |
| 14760       | CakSNP14760    | <i>Kabuli</i>    | <i>Ca_Kabuli_Scaffold171</i>  | 183721                         | (G/A)       |
| 14761       | CakSNP14761    | <i>Kabuli</i>    | <i>Ca_Kabuli_Scaffold171</i>  | 183727                         | (C/T)       |
| 14762       | CakSNP14762    | <i>Kabuli</i>    | <i>Ca_Kabuli_Scaffold171</i>  | 183759                         | (T/C)       |
| 14763       | CakSNP14763    | <i>Kabuli</i>    | <i>Ca_Kabuli_Scaffold171</i>  | 186125                         | (C/A)       |
| 14764       | CakSNP14764    | <i>Kabuli</i>    | <i>Ca_Kabuli_Scaffold171</i>  | 208050                         | (A/G)       |
| 14765       | CakSNP14765    | <i>Kabuli</i>    | <i>Ca_Kabuli_Scaffold171</i>  | 209964                         | (G/T)       |
| 14766       | CakSNP14766    | <i>Kabuli</i>    | <i>Ca_Kabuli_Scaffold1718</i> | 302                            | (G/A)       |
| 14767       | CakSNP14767    | <i>Kabuli</i>    | <i>Ca_Kabuli_Scaffold1718</i> | 295                            | (G/A)       |
| 14768       | CakSNP14768    | <i>Kabuli</i>    | <i>Ca_Kabuli_Scaffold1718</i> | 289                            | (C/T)       |
| 14769       | CakSNP14769    | <i>Kabuli</i>    | <i>Ca_Kabuli_Scaffold1718</i> | 268                            | (C/G)       |
| 14770       | CakSNP14770    | <i>Kabuli</i>    | <i>Ca_Kabuli_Scaffold1718</i> | 3898                           | (G/C)       |
| 14771       | CakSNP14771    | <i>Kabuli</i>    | <i>Ca_Kabuli_Scaffold1718</i> | 21521                          | (A/G)       |
| 14772       | CakSNP14772    | <i>Kabuli</i>    | <i>Ca_Kabuli_Scaffold1718</i> | 40669                          | (T/C)       |
| 14773       | CakSNP14773    | <i>Kabuli</i>    | <i>Ca_Kabuli_Scaffold1722</i> | 65999                          | (C/A)       |
| 14774       | CakSNP14774    | <i>Kabuli</i>    | <i>Ca_Kabuli_Scaffold1722</i> | 135589                         | (C/T)       |
| 14775       | CakSNP14775    | <i>Kabuli</i>    | <i>Ca_Kabuli_Scaffold1728</i> | 33301                          | (A/C)       |
| 14776       | CakSNP14776    | <i>Kabuli</i>    | <i>Ca_Kabuli_Scaffold174</i>  | 17761                          | (A/C)       |
| 14777       | CakSNP14777    | <i>Kabuli</i>    | <i>Ca_Kabuli_Scaffold174</i>  | 32366                          | (T/C)       |
| 14778       | CakSNP14778    | <i>Kabuli</i>    | <i>Ca_Kabuli_Scaffold174</i>  | 44014                          | (T/G)       |
| 14779       | CakSNP14779    | <i>Kabuli</i>    | <i>Ca_Kabuli_Scaffold174</i>  | 61454                          | (T/C)       |

| <b>S.N.</b> | <b>SNP IDs</b> | <b>Cultivars</b> | <b>Chromosomes/scaffolds</b>  | <b>Physical positions (bp)</b> | <b>SNPs</b> |
|-------------|----------------|------------------|-------------------------------|--------------------------------|-------------|
| 14780       | CakSNP14780    | <i>Kabuli</i>    | <i>Ca_Kabuli_Scaffold174</i>  | 263899                         | (G/A)       |
| 14781       | CakSNP14781    | <i>Kabuli</i>    | <i>Ca_Kabuli_Scaffold174</i>  | 335077                         | (C/T)       |
| 14782       | CakSNP14782    | <i>Kabuli</i>    | <i>Ca_Kabuli_Scaffold174</i>  | 341322                         | (C/T)       |
| 14783       | CakSNP14783    | <i>Kabuli</i>    | <i>Ca_Kabuli_Scaffold174</i>  | 457627                         | (G/A)       |
| 14784       | CakSNP14784    | <i>Kabuli</i>    | <i>Ca_Kabuli_Scaffold1750</i> | 15510                          | (C/T)       |
| 14785       | CakSNP14785    | <i>Kabuli</i>    | <i>Ca_Kabuli_Scaffold1750</i> | 137106                         | (A/C)       |
| 14786       | CakSNP14786    | <i>Kabuli</i>    | <i>Ca_Kabuli_Scaffold1750</i> | 204638                         | (G/A)       |
| 14787       | CakSNP14787    | <i>Kabuli</i>    | <i>Ca_Kabuli_Scaffold1751</i> | 189367                         | (T/G)       |
| 14788       | CakSNP14788    | <i>Kabuli</i>    | <i>Ca_Kabuli_Scaffold1751</i> | 192417                         | (C/A)       |
| 14789       | CakSNP14789    | <i>Kabuli</i>    | <i>Ca_Kabuli_Scaffold1751</i> | 192713                         | (G/T)       |
| 14790       | CakSNP14790    | <i>Kabuli</i>    | <i>Ca_Kabuli_Scaffold1751</i> | 193026                         | (T/A)       |
| 14791       | CakSNP14791    | <i>Kabuli</i>    | <i>Ca_Kabuli_Scaffold1751</i> | 193013                         | (T/G)       |
| 14792       | CakSNP14792    | <i>Kabuli</i>    | <i>Ca_Kabuli_Scaffold1751</i> | 266583                         | (G/A)       |
| 14793       | CakSNP14793    | <i>Kabuli</i>    | <i>Ca_Kabuli_Scaffold1751</i> | 496626                         | (G/A)       |
| 14794       | CakSNP14794    | <i>Kabuli</i>    | <i>Ca_Kabuli_Scaffold1751</i> | 528896                         | (A/C)       |
| 14795       | CakSNP14795    | <i>Kabuli</i>    | <i>Ca_Kabuli_Scaffold1751</i> | 529005                         | (C/T)       |
| 14796       | CakSNP14796    | <i>Kabuli</i>    | <i>Ca_Kabuli_Scaffold1751</i> | 528979                         | (T/C)       |
| 14797       | CakSNP14797    | <i>Kabuli</i>    | <i>Ca_Kabuli_Scaffold1751</i> | 528973                         | (C/G)       |
| 14798       | CakSNP14798    | <i>Kabuli</i>    | <i>Ca_Kabuli_Scaffold1751</i> | 625364                         | (G/A)       |
| 14799       | CakSNP14799    | <i>Kabuli</i>    | <i>Ca_Kabuli_Scaffold1751</i> | 625362                         | (C/T)       |
| 14800       | CakSNP14800    | <i>Kabuli</i>    | <i>Ca_Kabuli_Scaffold1751</i> | 625355                         | (C/T)       |
| 14801       | CakSNP14801    | <i>Kabuli</i>    | <i>Ca_Kabuli_Scaffold1751</i> | 625342                         | (C/T)       |
| 14802       | CakSNP14802    | <i>Kabuli</i>    | <i>Ca_Kabuli_Scaffold1751</i> | 625335                         | (G/A)       |
| 14803       | CakSNP14803    | <i>Kabuli</i>    | <i>Ca_Kabuli_Scaffold1751</i> | 625395                         | (A/G)       |
| 14804       | CakSNP14804    | <i>Kabuli</i>    | <i>Ca_Kabuli_Scaffold1751</i> | 625394                         | (C/T)       |
| 14805       | CakSNP14805    | <i>Kabuli</i>    | <i>Ca_Kabuli_Scaffold1751</i> | 625389                         | (A/C)       |
| 14806       | CakSNP14806    | <i>Kabuli</i>    | <i>Ca_Kabuli_Scaffold1751</i> | 625378                         | (G/A)       |
| 14807       | CakSNP14807    | <i>Kabuli</i>    | <i>Ca_Kabuli_Scaffold1751</i> | 625375                         | (G/A)       |
| 14808       | CakSNP14808    | <i>Kabuli</i>    | <i>Ca_Kabuli_Scaffold1751</i> | 625366                         | (T/C)       |
| 14809       | CakSNP14809    | <i>Kabuli</i>    | <i>Ca_Kabuli_Scaffold1751</i> | 625365                         | (T/C)       |
| 14810       | CakSNP14810    | <i>Kabuli</i>    | <i>Ca_Kabuli_Scaffold1751</i> | 625332                         | (A/C)       |
| 14811       | CakSNP14811    | <i>Kabuli</i>    | <i>Ca_Kabuli_Scaffold1751</i> | 625396                         | (G/A)       |
| 14812       | CakSNP14812    | <i>Kabuli</i>    | <i>Ca_Kabuli_Scaffold1776</i> | 740                            | (C/T)       |
| 14813       | CakSNP14813    | <i>Kabuli</i>    | <i>Ca_Kabuli_Scaffold1777</i> | 164715                         | (G/A)       |
| 14814       | CakSNP14814    | <i>Kabuli</i>    | <i>Ca_Kabuli_Scaffold1777</i> | 164722                         | (C/G)       |
| 14815       | CakSNP14815    | <i>Kabuli</i>    | <i>Ca_Kabuli_Scaffold1777</i> | 164747                         | (G/A)       |
| 14816       | CakSNP14816    | <i>Kabuli</i>    | <i>Ca_Kabuli_Scaffold1777</i> | 164791                         | (T/G)       |
| 14817       | CakSNP14817    | <i>Kabuli</i>    | <i>Ca_Kabuli_Scaffold1777</i> | 164758                         | (C/T)       |
| 14818       | CakSNP14818    | <i>Kabuli</i>    | <i>Ca_Kabuli_Scaffold1777</i> | 164753                         | (A/G)       |

| <b>S.N.</b> | <b>SNP IDs</b> | <b>Cultivars</b> | <b>Chromosomes/scaffolds</b>  | <b>Physical positions (bp)</b> | <b>SNPs</b> |
|-------------|----------------|------------------|-------------------------------|--------------------------------|-------------|
| 14819       | CakSNP14819    | <i>Kabuli</i>    | <i>Ca_Kabuli_Scaffold1777</i> | 164730                         | (T/G)       |
| 14820       | CakSNP14820    | <i>Kabuli</i>    | <i>Ca_Kabuli_Scaffold1777</i> | 169037                         | (G/T)       |
| 14821       | CakSNP14821    | <i>Kabuli</i>    | <i>Ca_Kabuli_Scaffold1777</i> | 343173                         | (C/T)       |
| 14822       | CakSNP14822    | <i>Kabuli</i>    | <i>Ca_Kabuli_Scaffold1777</i> | 343185                         | (G/A)       |
| 14823       | CakSNP14823    | <i>Kabuli</i>    | <i>Ca_Kabuli_Scaffold1777</i> | 448166                         | (A/G)       |
| 14824       | CakSNP14824    | <i>Kabuli</i>    | <i>Ca_Kabuli_Scaffold1777</i> | 448176                         | (C/T)       |
| 14825       | CakSNP14825    | <i>Kabuli</i>    | <i>Ca_Kabuli_Scaffold1777</i> | 448187                         | (G/T)       |
| 14826       | CakSNP14826    | <i>Kabuli</i>    | <i>Ca_Kabuli_Scaffold1777</i> | 448216                         | (C/T)       |
| 14827       | CakSNP14827    | <i>Kabuli</i>    | <i>Ca_Kabuli_Scaffold1779</i> | 957                            | (G/A)       |
| 14828       | CakSNP14828    | <i>Kabuli</i>    | <i>Ca_Kabuli_Scaffold1779</i> | 896                            | (A/G)       |
| 14829       | CakSNP14829    | <i>Kabuli</i>    | <i>Ca_Kabuli_Scaffold1779</i> | 890                            | (G/A)       |
| 14830       | CakSNP14830    | <i>Kabuli</i>    | <i>Ca_Kabuli_Scaffold1802</i> | 17068                          | (A/G)       |
| 14831       | CakSNP14831    | <i>Kabuli</i>    | <i>Ca_Kabuli_Scaffold1802</i> | 17033                          | (A/G)       |
| 14832       | CakSNP14832    | <i>Kabuli</i>    | <i>Ca_Kabuli_Scaffold1802</i> | 17111                          | (C/T)       |
| 14833       | CakSNP14833    | <i>Kabuli</i>    | <i>Ca_Kabuli_Scaffold1802</i> | 17117                          | (T/C)       |
| 14834       | CakSNP14834    | <i>Kabuli</i>    | <i>Ca_Kabuli_Scaffold1802</i> | 17120                          | (C/T)       |
| 14835       | CakSNP14835    | <i>Kabuli</i>    | <i>Ca_Kabuli_Scaffold1802</i> | 17123                          | (G/T)       |
| 14836       | CakSNP14836    | <i>Kabuli</i>    | <i>Ca_Kabuli_Scaffold1802</i> | 17132                          | (C/T)       |
| 14837       | CakSNP14837    | <i>Kabuli</i>    | <i>Ca_Kabuli_Scaffold1802</i> | 17150                          | (T/C)       |
| 14838       | CakSNP14838    | <i>Kabuli</i>    | <i>Ca_Kabuli_Scaffold1802</i> | 17151                          | (T/C)       |
| 14839       | CakSNP14839    | <i>Kabuli</i>    | <i>Ca_Kabuli_Scaffold1802</i> | 17168                          | (T/C)       |
| 14840       | CakSNP14840    | <i>Kabuli</i>    | <i>Ca_Kabuli_Scaffold1802</i> | 17177                          | (T/A)       |
| 14841       | CakSNP14841    | <i>Kabuli</i>    | <i>Ca_Kabuli_Scaffold1835</i> | 9398                           | (C/A)       |
| 14842       | CakSNP14842    | <i>Kabuli</i>    | <i>Ca_Kabuli_Scaffold1835</i> | 10541                          | (C/G)       |
| 14843       | CakSNP14843    | <i>Kabuli</i>    | <i>Ca_Kabuli_Scaffold1835</i> | 10563                          | (T/C)       |
| 14844       | CakSNP14844    | <i>Kabuli</i>    | <i>Ca_Kabuli_Scaffold1844</i> | 41899                          | (C/A)       |
| 14845       | CakSNP14845    | <i>Kabuli</i>    | <i>Ca_Kabuli_Scaffold1845</i> | 16292                          | (C/G)       |
| 14846       | CakSNP14846    | <i>Kabuli</i>    | <i>Ca_Kabuli_Scaffold1845</i> | 16317                          | (C/G)       |
| 14847       | CakSNP14847    | <i>Kabuli</i>    | <i>Ca_Kabuli_Scaffold1845</i> | 40886                          | (T/A)       |
| 14848       | CakSNP14848    | <i>Kabuli</i>    | <i>Ca_Kabuli_Scaffold1845</i> | 40872                          | (T/G)       |
| 14849       | CakSNP14849    | <i>Kabuli</i>    | <i>Ca_Kabuli_Scaffold1845</i> | 40871                          | (T/A)       |
| 14850       | CakSNP14850    | <i>Kabuli</i>    | <i>Ca_Kabuli_Scaffold1845</i> | 40842                          | (T/G)       |
| 14851       | CakSNP14851    | <i>Kabuli</i>    | <i>Ca_Kabuli_Scaffold1845</i> | 40821                          | (T/G)       |
| 14852       | CakSNP14852    | <i>Kabuli</i>    | <i>Ca_Kabuli_Scaffold1848</i> | 583                            | (A/G)       |
| 14853       | CakSNP14853    | <i>Kabuli</i>    | <i>Ca_Kabuli_Scaffold1848</i> | 565                            | (T/C)       |
| 14854       | CakSNP14854    | <i>Kabuli</i>    | <i>Ca_Kabuli_Scaffold1848</i> | 562                            | (G/C)       |
| 14855       | CakSNP14855    | <i>Kabuli</i>    | <i>Ca_Kabuli_Scaffold1848</i> | 532                            | (G/C)       |
| 14856       | CakSNP14856    | <i>Kabuli</i>    | <i>Ca_Kabuli_Scaffold186</i>  | 11965                          | (A/G)       |
| 14857       | CakSNP14857    | <i>Kabuli</i>    | <i>Ca_Kabuli_Scaffold186</i>  | 279942                         | (A/G)       |

| <b>S.N.</b> | <b>SNP IDs</b> | <b>Cultivars</b> | <b>Chromosomes/scaffolds</b>  | <b>Physical positions (bp)</b> | <b>SNPs</b> |
|-------------|----------------|------------------|-------------------------------|--------------------------------|-------------|
| 14858       | CakSNP14858    | <i>Kabuli</i>    | <i>Ca_Kabuli_Scaffold186</i>  | 280062                         | (T/C)       |
| 14859       | CakSNP14859    | <i>Kabuli</i>    | <i>Ca_Kabuli_Scaffold186</i>  | 280047                         | (A/G)       |
| 14860       | CakSNP14860    | <i>Kabuli</i>    | <i>Ca_Kabuli_Scaffold186</i>  | 280023                         | (C/T)       |
| 14861       | CakSNP14861    | <i>Kabuli</i>    | <i>Ca_Kabuli_Scaffold186</i>  | 280015                         | (T/C)       |
| 14862       | CakSNP14862    | <i>Kabuli</i>    | <i>Ca_Kabuli_Scaffold186</i>  | 280009                         | (G/T)       |
| 14863       | CakSNP14863    | <i>Kabuli</i>    | <i>Ca_Kabuli_Scaffold1866</i> | 106318                         | (T/A)       |
| 14864       | CakSNP14864    | <i>Kabuli</i>    | <i>Ca_Kabuli_Scaffold1866</i> | 106330                         | (A/T)       |
| 14865       | CakSNP14865    | <i>Kabuli</i>    | <i>Ca_Kabuli_Scaffold1866</i> | 106371                         | (C/A)       |
| 14866       | CakSNP14866    | <i>Kabuli</i>    | <i>Ca_Kabuli_Scaffold1866</i> | 106374                         | (A/T)       |
| 14867       | CakSNP14867    | <i>Kabuli</i>    | <i>Ca_Kabuli_Scaffold1866</i> | 106402                         | (C/T)       |
| 14868       | CakSNP14868    | <i>Kabuli</i>    | <i>Ca_Kabuli_Scaffold1866</i> | 110550                         | (A/G)       |
| 14869       | CakSNP14869    | <i>Kabuli</i>    | <i>Ca_Kabuli_Scaffold1866</i> | 110570                         | (G/A)       |
| 14870       | CakSNP14870    | <i>Kabuli</i>    | <i>Ca_Kabuli_Scaffold1866</i> | 110578                         | (C/A)       |
| 14871       | CakSNP14871    | <i>Kabuli</i>    | <i>Ca_Kabuli_Scaffold1899</i> | 148                            | (T/G)       |
| 14872       | CakSNP14872    | <i>Kabuli</i>    | <i>Ca_Kabuli_Scaffold1899</i> | 187                            | (A/G)       |
| 14873       | CakSNP14873    | <i>Kabuli</i>    | <i>Ca_Kabuli_Scaffold1899</i> | 267                            | (T/A)       |
| 14874       | CakSNP14874    | <i>Kabuli</i>    | <i>Ca_Kabuli_Scaffold1899</i> | 200                            | (G/A)       |
| 14875       | CakSNP14875    | <i>Kabuli</i>    | <i>Ca_Kabuli_Scaffold1918</i> | 216231                         | (T/G)       |
| 14876       | CakSNP14876    | <i>Kabuli</i>    | <i>Ca_Kabuli_Scaffold1918</i> | 216213                         | (T/C)       |
| 14877       | CakSNP14877    | <i>Kabuli</i>    | <i>Ca_Kabuli_Scaffold1918</i> | 216180                         | (C/A)       |
| 14878       | CakSNP14878    | <i>Kabuli</i>    | <i>Ca_Kabuli_Scaffold1918</i> | 237787                         | (G/A)       |
| 14879       | CakSNP14879    | <i>Kabuli</i>    | <i>Ca_Kabuli_Scaffold1918</i> | 245929                         | (T/C)       |
| 14880       | CakSNP14880    | <i>Kabuli</i>    | <i>Ca_Kabuli_Scaffold1928</i> | 103092                         | (A/G)       |
| 14881       | CakSNP14881    | <i>Kabuli</i>    | <i>Ca_Kabuli_Scaffold1928</i> | 103114                         | (G/A)       |
| 14882       | CakSNP14882    | <i>Kabuli</i>    | <i>Ca_Kabuli_Scaffold193</i>  | 38279                          | (C/A)       |
| 14883       | CakSNP14883    | <i>Kabuli</i>    | <i>Ca_Kabuli_Scaffold193</i>  | 186538                         | (C/T)       |
| 14884       | CakSNP14884    | <i>Kabuli</i>    | <i>Ca_Kabuli_Scaffold193</i>  | 186523                         | (T/C)       |
| 14885       | CakSNP14885    | <i>Kabuli</i>    | <i>Ca_Kabuli_Scaffold193</i>  | 186515                         | (T/G)       |
| 14886       | CakSNP14886    | <i>Kabuli</i>    | <i>Ca_Kabuli_Scaffold193</i>  | 186510                         | (C/A)       |
| 14887       | CakSNP14887    | <i>Kabuli</i>    | <i>Ca_Kabuli_Scaffold193</i>  | 186584                         | (A/G)       |
| 14888       | CakSNP14888    | <i>Kabuli</i>    | <i>Ca_Kabuli_Scaffold193</i>  | 186582                         | (C/A)       |
| 14889       | CakSNP14889    | <i>Kabuli</i>    | <i>Ca_Kabuli_Scaffold193</i>  | 186587                         | (G/T)       |
| 14890       | CakSNP14890    | <i>Kabuli</i>    | <i>Ca_Kabuli_Scaffold193</i>  | 186588                         | (C/G)       |
| 14891       | CakSNP14891    | <i>Kabuli</i>    | <i>Ca_Kabuli_Scaffold193</i>  | 186595                         | (C/T)       |
| 14892       | CakSNP14892    | <i>Kabuli</i>    | <i>Ca_Kabuli_Scaffold193</i>  | 186598                         | (A/G)       |
| 14893       | CakSNP14893    | <i>Kabuli</i>    | <i>Ca_Kabuli_Scaffold193</i>  | 186611                         | (G/A)       |
| 14894       | CakSNP14894    | <i>Kabuli</i>    | <i>Ca_Kabuli_Scaffold193</i>  | 186639                         | (C/T)       |
| 14895       | CakSNP14895    | <i>Kabuli</i>    | <i>Ca_Kabuli_Scaffold193</i>  | 186651                         | (T/C)       |
| 14896       | CakSNP14896    | <i>Kabuli</i>    | <i>Ca_Kabuli_Scaffold193</i>  | 186657                         | (G/A)       |

| <b>S.N.</b> | <b>SNP IDs</b> | <b>Cultivars</b> | <b>Chromosomes/scaffolds</b>  | <b>Physical positions (bp)</b> | <b>SNPs</b> |
|-------------|----------------|------------------|-------------------------------|--------------------------------|-------------|
| 14897       | CakSNP14897    | <i>Kabuli</i>    | <i>Ca_Kabuli_Scaffold193</i>  | 186661                         | (T/C)       |
| 14898       | CakSNP14898    | <i>Kabuli</i>    | <i>Ca_Kabuli_Scaffold193</i>  | 242763                         | (T/C)       |
| 14899       | CakSNP14899    | <i>Kabuli</i>    | <i>Ca_Kabuli_Scaffold193</i>  | 242733                         | (G/T)       |
| 14900       | CakSNP14900    | <i>Kabuli</i>    | <i>Ca_Kabuli_Scaffold193</i>  | 244735                         | (T/G)       |
| 14901       | CakSNP14901    | <i>Kabuli</i>    | <i>Ca_Kabuli_Scaffold1943</i> | 163784                         | (G/A)       |
| 14902       | CakSNP14902    | <i>Kabuli</i>    | <i>Ca_Kabuli_Scaffold1943</i> | 163780                         | (C/T)       |
| 14903       | CakSNP14903    | <i>Kabuli</i>    | <i>Ca_Kabuli_Scaffold1959</i> | 84160                          | (G/A)       |
| 14904       | CakSNP14904    | <i>Kabuli</i>    | <i>Ca_Kabuli_Scaffold1964</i> | 54613                          | (G/A)       |
| 14905       | CakSNP14905    | <i>Kabuli</i>    | <i>Ca_Kabuli_Scaffold1964</i> | 54604                          | (T/C)       |
| 14906       | CakSNP14906    | <i>Kabuli</i>    | <i>Ca_Kabuli_Scaffold1964</i> | 67416                          | (G/C)       |
| 14907       | CakSNP14907    | <i>Kabuli</i>    | <i>Ca_Kabuli_Scaffold198</i>  | 631160                         | (G/A)       |
| 14908       | CakSNP14908    | <i>Kabuli</i>    | <i>Ca_Kabuli_Scaffold198</i>  | 631174                         | (C/T)       |
| 14909       | CakSNP14909    | <i>Kabuli</i>    | <i>Ca_Kabuli_Scaffold198</i>  | 631185                         | (G/A)       |
| 14910       | CakSNP14910    | <i>Kabuli</i>    | <i>Ca_Kabuli_Scaffold198</i>  | 641266                         | (C/T)       |
| 14911       | CakSNP14911    | <i>Kabuli</i>    | <i>Ca_Kabuli_Scaffold198</i>  | 641252                         | (A/G)       |
| 14912       | CakSNP14912    | <i>Kabuli</i>    | <i>Ca_Kabuli_Scaffold198</i>  | 641243                         | (A/G)       |
| 14913       | CakSNP14913    | <i>Kabuli</i>    | <i>Ca_Kabuli_Scaffold1981</i> | 265110                         | (A/C)       |
| 14914       | CakSNP14914    | <i>Kabuli</i>    | <i>Ca_Kabuli_Scaffold1981</i> | 265126                         | (G/T)       |
| 14915       | CakSNP14915    | <i>Kabuli</i>    | <i>Ca_Kabuli_Scaffold1981</i> | 265216                         | (A/G)       |
| 14916       | CakSNP14916    | <i>Kabuli</i>    | <i>Ca_Kabuli_Scaffold1981</i> | 265191                         | (T/G)       |
| 14917       | CakSNP14917    | <i>Kabuli</i>    | <i>Ca_Kabuli_Scaffold1981</i> | 269879                         | (A/G)       |
| 14918       | CakSNP14918    | <i>Kabuli</i>    | <i>Ca_Kabuli_Scaffold1981</i> | 385683                         | (T/A)       |
| 14919       | CakSNP14919    | <i>Kabuli</i>    | <i>Ca_Kabuli_Scaffold1984</i> | 212011                         | (G/A)       |
| 14920       | CakSNP14920    | <i>Kabuli</i>    | <i>Ca_Kabuli_Scaffold1984</i> | 215969                         | (G/C)       |
| 14921       | CakSNP14921    | <i>Kabuli</i>    | <i>Ca_Kabuli_Scaffold1984</i> | 292507                         | (A/C)       |
| 14922       | CakSNP14922    | <i>Kabuli</i>    | <i>Ca_Kabuli_Scaffold1984</i> | 292511                         | (G/C)       |
| 14923       | CakSNP14923    | <i>Kabuli</i>    | <i>Ca_Kabuli_Scaffold1985</i> | 98611                          | (C/T)       |
| 14924       | CakSNP14924    | <i>Kabuli</i>    | <i>Ca_Kabuli_Scaffold1985</i> | 98659                          | (C/T)       |
| 14925       | CakSNP14925    | <i>Kabuli</i>    | <i>Ca_Kabuli_Scaffold1991</i> | 62009                          | (C/A)       |
| 14926       | CakSNP14926    | <i>Kabuli</i>    | <i>Ca_Kabuli_Scaffold1991</i> | 62121                          | (G/A)       |
| 14927       | CakSNP14927    | <i>Kabuli</i>    | <i>Ca_Kabuli_Scaffold1991</i> | 62085                          | (A/C)       |
| 14928       | CakSNP14928    | <i>Kabuli</i>    | <i>Ca_Kabuli_Scaffold1991</i> | 62115                          | (G/A)       |
| 14929       | CakSNP14929    | <i>Kabuli</i>    | <i>Ca_Kabuli_Scaffold1991</i> | 62131                          | (G/A)       |
| 14930       | CakSNP14930    | <i>Kabuli</i>    | <i>Ca_Kabuli_Scaffold1991</i> | 62154                          | (T/A)       |
| 14931       | CakSNP14931    | <i>Kabuli</i>    | <i>Ca_Kabuli_Scaffold1991</i> | 62147                          | (G/A)       |
| 14932       | CakSNP14932    | <i>Kabuli</i>    | <i>Ca_Kabuli_Scaffold1991</i> | 62422                          | (G/A)       |
| 14933       | CakSNP14933    | <i>Kabuli</i>    | <i>Ca_Kabuli_Scaffold2</i>    | 137309                         | (T/G)       |
| 14934       | CakSNP14934    | <i>Kabuli</i>    | <i>Ca_Kabuli_Scaffold2</i>    | 504258                         | (C/T)       |
| 14935       | CakSNP14935    | <i>Kabuli</i>    | <i>Ca_Kabuli_Scaffold2</i>    | 504253                         | (C/T)       |



| <b>S.N.</b> | <b>SNP IDs</b> | <b>Cultivars</b> | <b>Chromosomes/scaffolds</b>  | <b>Physical positions (bp)</b> | <b>SNPs</b> |
|-------------|----------------|------------------|-------------------------------|--------------------------------|-------------|
| 14936       | CakSNP14936    | <i>Kabuli</i>    | <i>Ca_Kabuli_Scaffold2</i>    | 504248                         | (G/A)       |
| 14937       | CakSNP14937    | <i>Kabuli</i>    | <i>Ca_Kabuli_Scaffold202</i>  | 16084                          | (T/C)       |
| 14938       | CakSNP14938    | <i>Kabuli</i>    | <i>Ca_Kabuli_Scaffold202</i>  | 92532                          | (C/A)       |
| 14939       | CakSNP14939    | <i>Kabuli</i>    | <i>Ca_Kabuli_Scaffold202</i>  | 96456                          | (T/C)       |
| 14940       | CakSNP14940    | <i>Kabuli</i>    | <i>Ca_Kabuli_Scaffold202</i>  | 96444                          | (G/A)       |
| 14941       | CakSNP14941    | <i>Kabuli</i>    | <i>Ca_Kabuli_Scaffold202</i>  | 96532                          | (G/T)       |
| 14942       | CakSNP14942    | <i>Kabuli</i>    | <i>Ca_Kabuli_Scaffold202</i>  | 96589                          | (A/T)       |
| 14943       | CakSNP14943    | <i>Kabuli</i>    | <i>Ca_Kabuli_Scaffold202</i>  | 96580                          | (T/G)       |
| 14944       | CakSNP14944    | <i>Kabuli</i>    | <i>Ca_Kabuli_Scaffold202</i>  | 96576                          | (A/G)       |
| 14945       | CakSNP14945    | <i>Kabuli</i>    | <i>Ca_Kabuli_Scaffold202</i>  | 99123                          | (C/T)       |
| 14946       | CakSNP14946    | <i>Kabuli</i>    | <i>Ca_Kabuli_Scaffold2027</i> | 100867                         | (G/C)       |
| 14947       | CakSNP14947    | <i>Kabuli</i>    | <i>Ca_Kabuli_Scaffold2027</i> | 152763                         | (C/A)       |
| 14948       | CakSNP14948    | <i>Kabuli</i>    | <i>Ca_Kabuli_Scaffold2030</i> | 13855                          | (G/A)       |
| 14949       | CakSNP14949    | <i>Kabuli</i>    | <i>Ca_Kabuli_Scaffold2030</i> | 13822                          | (C/T)       |
| 14950       | CakSNP14950    | <i>Kabuli</i>    | <i>Ca_Kabuli_Scaffold2030</i> | 13807                          | (G/A)       |
| 14951       | CakSNP14951    | <i>Kabuli</i>    | <i>Ca_Kabuli_Scaffold2030</i> | 13889                          | (C/T)       |
| 14952       | CakSNP14952    | <i>Kabuli</i>    | <i>Ca_Kabuli_Scaffold2030</i> | 13874                          | (G/T)       |
| 14953       | CakSNP14953    | <i>Kabuli</i>    | <i>Ca_Kabuli_Scaffold2033</i> | 115044                         | (C/T)       |
| 14954       | CakSNP14954    | <i>Kabuli</i>    | <i>Ca_Kabuli_Scaffold2033</i> | 118686                         | (C/T)       |
| 14955       | CakSNP14955    | <i>Kabuli</i>    | <i>Ca_Kabuli_Scaffold2033</i> | 118779                         | (G/T)       |
| 14956       | CakSNP14956    | <i>Kabuli</i>    | <i>Ca_Kabuli_Scaffold2033</i> | 118760                         | (T/G)       |
| 14957       | CakSNP14957    | <i>Kabuli</i>    | <i>Ca_Kabuli_Scaffold2033</i> | 119057                         | (T/G)       |
| 14958       | CakSNP14958    | <i>Kabuli</i>    | <i>Ca_Kabuli_Scaffold2033</i> | 119166                         | (T/C)       |
| 14959       | CakSNP14959    | <i>Kabuli</i>    | <i>Ca_Kabuli_Scaffold2033</i> | 119645                         | (G/A)       |
| 14960       | CakSNP14960    | <i>Kabuli</i>    | <i>Ca_Kabuli_Scaffold2033</i> | 119648                         | (G/A)       |
| 14961       | CakSNP14961    | <i>Kabuli</i>    | <i>Ca_Kabuli_Scaffold2033</i> | 119703                         | (C/T)       |
| 14962       | CakSNP14962    | <i>Kabuli</i>    | <i>Ca_Kabuli_Scaffold2033</i> | 119715                         | (G/T)       |
| 14963       | CakSNP14963    | <i>Kabuli</i>    | <i>Ca_Kabuli_Scaffold2033</i> | 119728                         | (G/A)       |
| 14964       | CakSNP14964    | <i>Kabuli</i>    | <i>Ca_Kabuli_Scaffold2039</i> | 116734                         | (A/G)       |
| 14965       | CakSNP14965    | <i>Kabuli</i>    | <i>Ca_Kabuli_Scaffold2040</i> | 139597                         | (A/G)       |
| 14966       | CakSNP14966    | <i>Kabuli</i>    | <i>Ca_Kabuli_Scaffold2040</i> | 139585                         | (A/C)       |
| 14967       | CakSNP14967    | <i>Kabuli</i>    | <i>Ca_Kabuli_Scaffold2040</i> | 139584                         | (G/A)       |
| 14968       | CakSNP14968    | <i>Kabuli</i>    | <i>Ca_Kabuli_Scaffold2040</i> | 139581                         | (G/A)       |
| 14969       | CakSNP14969    | <i>Kabuli</i>    | <i>Ca_Kabuli_Scaffold2040</i> | 139560                         | (G/T)       |
| 14970       | CakSNP14970    | <i>Kabuli</i>    | <i>Ca_Kabuli_Scaffold2040</i> | 139550                         | (G/A)       |
| 14971       | CakSNP14971    | <i>Kabuli</i>    | <i>Ca_Kabuli_Scaffold2040</i> | 139548                         | (C/T)       |
| 14972       | CakSNP14972    | <i>Kabuli</i>    | <i>Ca_Kabuli_Scaffold2040</i> | 139544                         | (C/A)       |
| 14973       | CakSNP14973    | <i>Kabuli</i>    | <i>Ca_Kabuli_Scaffold2040</i> | 139541                         | (T/C)       |
| 14974       | CakSNP14974    | <i>Kabuli</i>    | <i>Ca_Kabuli_Scaffold2040</i> | 139538                         | (G/A)       |

| <b>S.N.</b> | <b>SNP IDs</b> | <b>Cultivars</b> | <b>Chromosomes/scaffolds</b>  | <b>Physical positions (bp)</b> | <b>SNPs</b> |
|-------------|----------------|------------------|-------------------------------|--------------------------------|-------------|
| 14975       | CakSNP14975    | <i>Kabuli</i>    | <i>Ca_Kabuli_Scaffold2040</i> | 139545                         | (G/A)       |
| 14976       | CakSNP14976    | <i>Kabuli</i>    | <i>Ca_Kabuli_Scaffold2040</i> | 139603                         | (C/T)       |
| 14977       | CakSNP14977    | <i>Kabuli</i>    | <i>Ca_Kabuli_Scaffold205</i>  | 74448                          | (T/G)       |
| 14978       | CakSNP14978    | <i>Kabuli</i>    | <i>Ca_Kabuli_Scaffold205</i>  | 74430                          | (A/G)       |
| 14979       | CakSNP14979    | <i>Kabuli</i>    | <i>Ca_Kabuli_Scaffold205</i>  | 74397                          | (G/A)       |
| 14980       | CakSNP14980    | <i>Kabuli</i>    | <i>Ca_Kabuli_Scaffold205</i>  | 74399                          | (C/T)       |
| 14981       | CakSNP14981    | <i>Kabuli</i>    | <i>Ca_Kabuli_Scaffold205</i>  | 74424                          | (T/C)       |
| 14982       | CakSNP14982    | <i>Kabuli</i>    | <i>Ca_Kabuli_Scaffold205</i>  | 74432                          | (G/A)       |
| 14983       | CakSNP14983    | <i>Kabuli</i>    | <i>Ca_Kabuli_Scaffold205</i>  | 74433                          | (G/A)       |
| 14984       | CakSNP14984    | <i>Kabuli</i>    | <i>Ca_Kabuli_Scaffold206</i>  | 58349                          | (C/A)       |
| 14985       | CakSNP14985    | <i>Kabuli</i>    | <i>Ca_Kabuli_Scaffold206</i>  | 62985                          | (G/A)       |
| 14986       | CakSNP14986    | <i>Kabuli</i>    | <i>Ca_Kabuli_Scaffold208</i>  | 344503                         | (G/T)       |
| 14987       | CakSNP14987    | <i>Kabuli</i>    | <i>Ca_Kabuli_Scaffold208</i>  | 344515                         | (A/G)       |
| 14988       | CakSNP14988    | <i>Kabuli</i>    | <i>Ca_Kabuli_Scaffold208</i>  | 344519                         | (A/T)       |
| 14989       | CakSNP14989    | <i>Kabuli</i>    | <i>Ca_Kabuli_Scaffold208</i>  | 344533                         | (C/T)       |
| 14990       | CakSNP14990    | <i>Kabuli</i>    | <i>Ca_Kabuli_Scaffold208</i>  | 344556                         | (T/G)       |
| 14991       | CakSNP14991    | <i>Kabuli</i>    | <i>Ca_Kabuli_Scaffold2097</i> | 54210                          | (A/C)       |
| 14992       | CakSNP14992    | <i>Kabuli</i>    | <i>Ca_Kabuli_Scaffold210</i>  | 293799                         | (G/A)       |
| 14993       | CakSNP14993    | <i>Kabuli</i>    | <i>Ca_Kabuli_Scaffold210</i>  | 355284                         | (G/T)       |
| 14994       | CakSNP14994    | <i>Kabuli</i>    | <i>Ca_Kabuli_Scaffold210</i>  | 533483                         | (G/A)       |
| 14995       | CakSNP14995    | <i>Kabuli</i>    | <i>Ca_Kabuli_Scaffold210</i>  | 533416                         | (G/A)       |
| 14996       | CakSNP14996    | <i>Kabuli</i>    | <i>Ca_Kabuli_Scaffold210</i>  | 617431                         | (T/A)       |
| 14997       | CakSNP14997    | <i>Kabuli</i>    | <i>Ca_Kabuli_Scaffold2104</i> | 61757                          | (T/C)       |
| 14998       | CakSNP14998    | <i>Kabuli</i>    | <i>Ca_Kabuli_Scaffold2104</i> | 61745                          | (T/G)       |
| 14999       | CakSNP14999    | <i>Kabuli</i>    | <i>Ca_Kabuli_Scaffold2104</i> | 61734                          | (T/G)       |
| 15000       | CakSNP15000    | <i>Kabuli</i>    | <i>Ca_Kabuli_Scaffold2104</i> | 61723                          | (G/A)       |
| 15001       | CakSNP15001    | <i>Kabuli</i>    | <i>Ca_Kabuli_Scaffold2104</i> | 61710                          | (C/T)       |
| 15002       | CakSNP15002    | <i>Kabuli</i>    | <i>Ca_Kabuli_Scaffold2104</i> | 61705                          | (C/T)       |
| 15003       | CakSNP15003    | <i>Kabuli</i>    | <i>Ca_Kabuli_Scaffold2152</i> | 372404                         | (A/T)       |
| 15004       | CakSNP15004    | <i>Kabuli</i>    | <i>Ca_Kabuli_Scaffold2166</i> | 228653                         | (G/C)       |
| 15005       | CakSNP15005    | <i>Kabuli</i>    | <i>Ca_Kabuli_Scaffold2166</i> | 228710                         | (G/A)       |
| 15006       | CakSNP15006    | <i>Kabuli</i>    | <i>Ca_Kabuli_Scaffold2170</i> | 4821                           | (G/A)       |
| 15007       | CakSNP15007    | <i>Kabuli</i>    | <i>Ca_Kabuli_Scaffold2192</i> | 67485                          | (A/G)       |
| 15008       | CakSNP15008    | <i>Kabuli</i>    | <i>Ca_Kabuli_Scaffold2192</i> | 67589                          | (A/C)       |
| 15009       | CakSNP15009    | <i>Kabuli</i>    | <i>Ca_Kabuli_Scaffold221</i>  | 53841                          | (T/G)       |
| 15010       | CakSNP15010    | <i>Kabuli</i>    | <i>Ca_Kabuli_Scaffold2248</i> | 5538                           | (A/T)       |
| 15011       | CakSNP15011    | <i>Kabuli</i>    | <i>Ca_Kabuli_Scaffold2248</i> | 5562                           | (C/T)       |
| 15012       | CakSNP15012    | <i>Kabuli</i>    | <i>Ca_Kabuli_Scaffold2248</i> | 5570                           | (T/C)       |
| 15013       | CakSNP15013    | <i>Kabuli</i>    | <i>Ca_Kabuli_Scaffold2248</i> | 5520                           | (C/A)       |

| <b>S.N.</b> | <b>SNP IDs</b> | <b>Cultivars</b> | <b>Chromosomes/scaffolds</b>  | <b>Physical positions (bp)</b> | <b>SNPs</b> |
|-------------|----------------|------------------|-------------------------------|--------------------------------|-------------|
| 15014       | CakSNP15014    | <i>Kabuli</i>    | <i>Ca_Kabuli_Scaffold2249</i> | 4446                           | (A/C)       |
| 15015       | CakSNP15015    | <i>Kabuli</i>    | <i>Ca_Kabuli_Scaffold2269</i> | 58091                          | (A/T)       |
| 15016       | CakSNP15016    | <i>Kabuli</i>    | <i>Ca_Kabuli_Scaffold2269</i> | 123799                         | (A/C)       |
| 15017       | CakSNP15017    | <i>Kabuli</i>    | <i>Ca_Kabuli_Scaffold2269</i> | 126013                         | (A/C)       |
| 15018       | CakSNP15018    | <i>Kabuli</i>    | <i>Ca_Kabuli_Scaffold2301</i> | 70721                          | (A/G)       |
| 15019       | CakSNP15019    | <i>Kabuli</i>    | <i>Ca_Kabuli_Scaffold2330</i> | 27894                          | (A/C)       |
| 15020       | CakSNP15020    | <i>Kabuli</i>    | <i>Ca_Kabuli_Scaffold2330</i> | 64157                          | (T/C)       |
| 15021       | CakSNP15021    | <i>Kabuli</i>    | <i>Ca_Kabuli_Scaffold2330</i> | 65482                          | (T/G)       |
| 15022       | CakSNP15022    | <i>Kabuli</i>    | <i>Ca_Kabuli_Scaffold2330</i> | 65617                          | (G/A)       |
| 15023       | CakSNP15023    | <i>Kabuli</i>    | <i>Ca_Kabuli_Scaffold2330</i> | 65650                          | (C/T)       |
| 15024       | CakSNP15024    | <i>Kabuli</i>    | <i>Ca_Kabuli_Scaffold2330</i> | 83061                          | (C/T)       |
| 15025       | CakSNP15025    | <i>Kabuli</i>    | <i>Ca_Kabuli_Scaffold2330</i> | 83064                          | (A/G)       |
| 15026       | CakSNP15026    | <i>Kabuli</i>    | <i>Ca_Kabuli_Scaffold2330</i> | 83077                          | (G/C)       |
| 15027       | CakSNP15027    | <i>Kabuli</i>    | <i>Ca_Kabuli_Scaffold2330</i> | 83112                          | (A/G)       |
| 15028       | CakSNP15028    | <i>Kabuli</i>    | <i>Ca_Kabuli_Scaffold2330</i> | 83116                          | (G/T)       |
| 15029       | CakSNP15029    | <i>Kabuli</i>    | <i>Ca_Kabuli_Scaffold235</i>  | 67258                          | (G/T)       |
| 15030       | CakSNP15030    | <i>Kabuli</i>    | <i>Ca_Kabuli_Scaffold2371</i> | 139149                         | (A/G)       |
| 15031       | CakSNP15031    | <i>Kabuli</i>    | <i>Ca_Kabuli_Scaffold2373</i> | 3818                           | (A/G)       |
| 15032       | CakSNP15032    | <i>Kabuli</i>    | <i>Ca_Kabuli_Scaffold2373</i> | 3815                           | (T/A)       |
| 15033       | CakSNP15033    | <i>Kabuli</i>    | <i>Ca_Kabuli_Scaffold2373</i> | 3811                           | (C/T)       |
| 15034       | CakSNP15034    | <i>Kabuli</i>    | <i>Ca_Kabuli_Scaffold2373</i> | 3793                           | (C/T)       |
| 15035       | CakSNP15035    | <i>Kabuli</i>    | <i>Ca_Kabuli_Scaffold2373</i> | 3923                           | (T/C)       |
| 15036       | CakSNP15036    | <i>Kabuli</i>    | <i>Ca_Kabuli_Scaffold2373</i> | 3871                           | (A/T)       |
| 15037       | CakSNP15037    | <i>Kabuli</i>    | <i>Ca_Kabuli_Scaffold2373</i> | 3862                           | (C/T)       |
| 15038       | CakSNP15038    | <i>Kabuli</i>    | <i>Ca_Kabuli_Scaffold2373</i> | 12916                          | (C/A)       |
| 15039       | CakSNP15039    | <i>Kabuli</i>    | <i>Ca_Kabuli_Scaffold2373</i> | 12969                          | (G/C)       |
| 15040       | CakSNP15040    | <i>Kabuli</i>    | <i>Ca_Kabuli_Scaffold2373</i> | 12978                          | (A/T)       |
| 15041       | CakSNP15041    | <i>Kabuli</i>    | <i>Ca_Kabuli_Scaffold2373</i> | 62495                          | (C/T)       |
| 15042       | CakSNP15042    | <i>Kabuli</i>    | <i>Ca_Kabuli_Scaffold2373</i> | 62494                          | (A/G)       |
| 15043       | CakSNP15043    | <i>Kabuli</i>    | <i>Ca_Kabuli_Scaffold2373</i> | 62473                          | (G/A)       |
| 15044       | CakSNP15044    | <i>Kabuli</i>    | <i>Ca_Kabuli_Scaffold2373</i> | 62434                          | (G/A)       |
| 15045       | CakSNP15045    | <i>Kabuli</i>    | <i>Ca_Kabuli_Scaffold2373</i> | 62433                          | (A/G)       |
| 15046       | CakSNP15046    | <i>Kabuli</i>    | <i>Ca_Kabuli_Scaffold2373</i> | 127884                         | (A/C)       |
| 15047       | CakSNP15047    | <i>Kabuli</i>    | <i>Ca_Kabuli_Scaffold2373</i> | 127851                         | (C/T)       |
| 15048       | CakSNP15048    | <i>Kabuli</i>    | <i>Ca_Kabuli_Scaffold2373</i> | 127905                         | (C/T)       |
| 15049       | CakSNP15049    | <i>Kabuli</i>    | <i>Ca_Kabuli_Scaffold2373</i> | 127870                         | (T/G)       |
| 15050       | CakSNP15050    | <i>Kabuli</i>    | <i>Ca_Kabuli_Scaffold2373</i> | 127855                         | (A/C)       |
| 15051       | CakSNP15051    | <i>Kabuli</i>    | <i>Ca_Kabuli_Scaffold2392</i> | 35402                          | (A/C)       |
| 15052       | CakSNP15052    | <i>Kabuli</i>    | <i>Ca_Kabuli_Scaffold2392</i> | 198120                         | (G/T)       |

| <b>S.N.</b> | <b>SNP IDs</b> | <b>Cultivars</b> | <b>Chromosomes/scaffolds</b>  | <b>Physical positions (bp)</b> | <b>SNPs</b> |
|-------------|----------------|------------------|-------------------------------|--------------------------------|-------------|
| 15053       | CakSNP15053    | <i>Kabuli</i>    | <i>Ca_Kabuli_Scaffold2392</i> | 314304                         | (T/C)       |
| 15054       | CakSNP15054    | <i>Kabuli</i>    | <i>Ca_Kabuli_Scaffold2392</i> | 314322                         | (T/C)       |
| 15055       | CakSNP15055    | <i>Kabuli</i>    | <i>Ca_Kabuli_Scaffold2392</i> | 314323                         | (G/A)       |
| 15056       | CakSNP15056    | <i>Kabuli</i>    | <i>Ca_Kabuli_Scaffold2392</i> | 314343                         | (G/A)       |
| 15057       | CakSNP15057    | <i>Kabuli</i>    | <i>Ca_Kabuli_Scaffold2392</i> | 314344                         | (T/C)       |
| 15058       | CakSNP15058    | <i>Kabuli</i>    | <i>Ca_Kabuli_Scaffold2392</i> | 314349                         | (C/G)       |
| 15059       | CakSNP15059    | <i>Kabuli</i>    | <i>Ca_Kabuli_Scaffold2392</i> | 314353                         | (G/A)       |
| 15060       | CakSNP15060    | <i>Kabuli</i>    | <i>Ca_Kabuli_Scaffold2392</i> | 314345                         | (G/A)       |
| 15061       | CakSNP15061    | <i>Kabuli</i>    | <i>Ca_Kabuli_Scaffold2392</i> | 314401                         | (A/C)       |
| 15062       | CakSNP15062    | <i>Kabuli</i>    | <i>Ca_Kabuli_Scaffold240</i>  | 6231                           | (T/A)       |
| 15063       | CakSNP15063    | <i>Kabuli</i>    | <i>Ca_Kabuli_Scaffold240</i>  | 6193                           | (G/A)       |
| 15064       | CakSNP15064    | <i>Kabuli</i>    | <i>Ca_Kabuli_Scaffold240</i>  | 6152                           | (C/T)       |
| 15065       | CakSNP15065    | <i>Kabuli</i>    | <i>Ca_Kabuli_Scaffold240</i>  | 119157                         | (G/A)       |
| 15066       | CakSNP15066    | <i>Kabuli</i>    | <i>Ca_Kabuli_Scaffold240</i>  | 119301                         | (T/C)       |
| 15067       | CakSNP15067    | <i>Kabuli</i>    | <i>Ca_Kabuli_Scaffold240</i>  | 119297                         | (C/A)       |
| 15068       | CakSNP15068    | <i>Kabuli</i>    | <i>Ca_Kabuli_Scaffold240</i>  | 119278                         | (T/C)       |
| 15069       | CakSNP15069    | <i>Kabuli</i>    | <i>Ca_Kabuli_Scaffold240</i>  | 119269                         | (C/T)       |
| 15070       | CakSNP15070    | <i>Kabuli</i>    | <i>Ca_Kabuli_Scaffold240</i>  | 119267                         | (G/C)       |
| 15071       | CakSNP15071    | <i>Kabuli</i>    | <i>Ca_Kabuli_Scaffold240</i>  | 119265                         | (C/G)       |
| 15072       | CakSNP15072    | <i>Kabuli</i>    | <i>Ca_Kabuli_Scaffold2415</i> | 117840                         | (A/G)       |
| 15073       | CakSNP15073    | <i>Kabuli</i>    | <i>Ca_Kabuli_Scaffold2415</i> | 117871                         | (A/C)       |
| 15074       | CakSNP15074    | <i>Kabuli</i>    | <i>Ca_Kabuli_Scaffold2415</i> | 117882                         | (A/G)       |
| 15075       | CakSNP15075    | <i>Kabuli</i>    | <i>Ca_Kabuli_Scaffold2415</i> | 117970                         | (G/A)       |
| 15076       | CakSNP15076    | <i>Kabuli</i>    | <i>Ca_Kabuli_Scaffold242</i>  | 293872                         | (A/G)       |
| 15077       | CakSNP15077    | <i>Kabuli</i>    | <i>Ca_Kabuli_Scaffold250</i>  | 38270                          | (A/G)       |
| 15078       | CakSNP15078    | <i>Kabuli</i>    | <i>Ca_Kabuli_Scaffold2501</i> | 287                            | (C/T)       |
| 15079       | CakSNP15079    | <i>Kabuli</i>    | <i>Ca_Kabuli_Scaffold2501</i> | 282                            | (C/A)       |
| 15080       | CakSNP15080    | <i>Kabuli</i>    | <i>Ca_Kabuli_Scaffold2501</i> | 251                            | (T/G)       |
| 15081       | CakSNP15081    | <i>Kabuli</i>    | <i>Ca_Kabuli_Scaffold2501</i> | 242                            | (C/G)       |
| 15082       | CakSNP15082    | <i>Kabuli</i>    | <i>Ca_Kabuli_Scaffold2516</i> | 58947                          | (T/C)       |
| 15083       | CakSNP15083    | <i>Kabuli</i>    | <i>Ca_Kabuli_Scaffold2521</i> | 57762                          | (T/C)       |
| 15084       | CakSNP15084    | <i>Kabuli</i>    | <i>Ca_Kabuli_Scaffold2521</i> | 57725                          | (G/A)       |
| 15085       | CakSNP15085    | <i>Kabuli</i>    | <i>Ca_Kabuli_Scaffold2521</i> | 57709                          | (G/T)       |
| 15086       | CakSNP15086    | <i>Kabuli</i>    | <i>Ca_Kabuli_Scaffold2557</i> | 110378                         | (C/T)       |
| 15087       | CakSNP15087    | <i>Kabuli</i>    | <i>Ca_Kabuli_Scaffold2557</i> | 110414                         | (T/G)       |
| 15088       | CakSNP15088    | <i>Kabuli</i>    | <i>Ca_Kabuli_Scaffold2557</i> | 110437                         | (C/T)       |
| 15089       | CakSNP15089    | <i>Kabuli</i>    | <i>Ca_Kabuli_Scaffold2557</i> | 110441                         | (T/A)       |
| 15090       | CakSNP15090    | <i>Kabuli</i>    | <i>Ca_Kabuli_Scaffold2569</i> | 58152                          | (T/G)       |
| 15091       | CakSNP15091    | <i>Kabuli</i>    | <i>Ca_Kabuli_Scaffold2575</i> | 101222                         | (C/T)       |

| <b>S.N.</b> | <b>SNP IDs</b> | <b>Cultivars</b> | <b>Chromosomes/scaffolds</b>  | <b>Physical positions (bp)</b> | <b>SNPs</b> |
|-------------|----------------|------------------|-------------------------------|--------------------------------|-------------|
| 15092       | CakSNP15092    | <i>Kabuli</i>    | <i>Ca_Kabuli_Scaffold2617</i> | 467848                         | (C/T)       |
| 15093       | CakSNP15093    | <i>Kabuli</i>    | <i>Ca_Kabuli_Scaffold263</i>  | 85006                          | (G/A)       |
| 15094       | CakSNP15094    | <i>Kabuli</i>    | <i>Ca_Kabuli_Scaffold263</i>  | 85003                          | (C/T)       |
| 15095       | CakSNP15095    | <i>Kabuli</i>    | <i>Ca_Kabuli_Scaffold263</i>  | 84998                          | (G/A)       |
| 15096       | CakSNP15096    | <i>Kabuli</i>    | <i>Ca_Kabuli_Scaffold263</i>  | 84976                          | (A/G)       |
| 15097       | CakSNP15097    | <i>Kabuli</i>    | <i>Ca_Kabuli_Scaffold263</i>  | 84970                          | (T/C)       |
| 15098       | CakSNP15098    | <i>Kabuli</i>    | <i>Ca_Kabuli_Scaffold263</i>  | 84952                          | (T/G)       |
| 15099       | CakSNP15099    | <i>Kabuli</i>    | <i>Ca_Kabuli_Scaffold2720</i> | 30699                          | (C/T)       |
| 15100       | CakSNP15100    | <i>Kabuli</i>    | <i>Ca_Kabuli_Scaffold2720</i> | 30701                          | (G/A)       |
| 15101       | CakSNP15101    | <i>Kabuli</i>    | <i>Ca_Kabuli_Scaffold2720</i> | 30760                          | (T/C)       |
| 15102       | CakSNP15102    | <i>Kabuli</i>    | <i>Ca_Kabuli_Scaffold2720</i> | 177550                         | (G/T)       |
| 15103       | CakSNP15103    | <i>Kabuli</i>    | <i>Ca_Kabuli_Scaffold2720</i> | 177578                         | (T/C)       |
| 15104       | CakSNP15104    | <i>Kabuli</i>    | <i>Ca_Kabuli_Scaffold2722</i> | 52416                          | (G/T)       |
| 15105       | CakSNP15105    | <i>Kabuli</i>    | <i>Ca_Kabuli_Scaffold2722</i> | 52397                          | (G/T)       |
| 15106       | CakSNP15106    | <i>Kabuli</i>    | <i>Ca_Kabuli_Scaffold2722</i> | 67309                          | (C/A)       |
| 15107       | CakSNP15107    | <i>Kabuli</i>    | <i>Ca_Kabuli_Scaffold2722</i> | 75609                          | (A/G)       |
| 15108       | CakSNP15108    | <i>Kabuli</i>    | <i>Ca_Kabuli_Scaffold2728</i> | 1371                           | (G/A)       |
| 15109       | CakSNP15109    | <i>Kabuli</i>    | <i>Ca_Kabuli_Scaffold273</i>  | 202514                         | (T/G)       |
| 15110       | CakSNP15110    | <i>Kabuli</i>    | <i>Ca_Kabuli_Scaffold2738</i> | 1307                           | (G/A)       |
| 15111       | CakSNP15111    | <i>Kabuli</i>    | <i>Ca_Kabuli_Scaffold275</i>  | 208095                         | (G/A)       |
| 15112       | CakSNP15112    | <i>Kabuli</i>    | <i>Ca_Kabuli_Scaffold275</i>  | 208067                         | (C/A)       |
| 15113       | CakSNP15113    | <i>Kabuli</i>    | <i>Ca_Kabuli_Scaffold275</i>  | 208786                         | (G/C)       |
| 15114       | CakSNP15114    | <i>Kabuli</i>    | <i>Ca_Kabuli_Scaffold275</i>  | 230606                         | (A/G)       |
| 15115       | CakSNP15115    | <i>Kabuli</i>    | <i>Ca_Kabuli_Scaffold275</i>  | 347422                         | (C/A)       |
| 15116       | CakSNP15116    | <i>Kabuli</i>    | <i>Ca_Kabuli_Scaffold275</i>  | 347384                         | (G/A)       |
| 15117       | CakSNP15117    | <i>Kabuli</i>    | <i>Ca_Kabuli_Scaffold275</i>  | 347361                         | (C/T)       |
| 15118       | CakSNP15118    | <i>Kabuli</i>    | <i>Ca_Kabuli_Scaffold275</i>  | 479497                         | (C/T)       |
| 15119       | CakSNP15119    | <i>Kabuli</i>    | <i>Ca_Kabuli_Scaffold275</i>  | 562610                         | (C/T)       |
| 15120       | CakSNP15120    | <i>Kabuli</i>    | <i>Ca_Kabuli_Scaffold2763</i> | 4688                           | (A/C)       |
| 15121       | CakSNP15121    | <i>Kabuli</i>    | <i>Ca_Kabuli_Scaffold2763</i> | 4706                           | (G/T)       |
| 15122       | CakSNP15122    | <i>Kabuli</i>    | <i>Ca_Kabuli_Scaffold2763</i> | 4719                           | (G/A)       |
| 15123       | CakSNP15123    | <i>Kabuli</i>    | <i>Ca_Kabuli_Scaffold2763</i> | 4732                           | (C/G)       |
| 15124       | CakSNP15124    | <i>Kabuli</i>    | <i>Ca_Kabuli_Scaffold2763</i> | 4738                           | (C/G)       |
| 15125       | CakSNP15125    | <i>Kabuli</i>    | <i>Ca_Kabuli_Scaffold2763</i> | 4804                           | (A/T)       |
| 15126       | CakSNP15126    | <i>Kabuli</i>    | <i>Ca_Kabuli_Scaffold2763</i> | 4800                           | (T/A)       |
| 15127       | CakSNP15127    | <i>Kabuli</i>    | <i>Ca_Kabuli_Scaffold2763</i> | 4787                           | (A/G)       |
| 15128       | CakSNP15128    | <i>Kabuli</i>    | <i>Ca_Kabuli_Scaffold2763</i> | 4782                           | (C/T)       |
| 15129       | CakSNP15129    | <i>Kabuli</i>    | <i>Ca_Kabuli_Scaffold2763</i> | 25756                          | (T/G)       |
| 15130       | CakSNP15130    | <i>Kabuli</i>    | <i>Ca_Kabuli_Scaffold2763</i> | 25769                          | (A/G)       |

| <b>S.N.</b> | <b>SNP IDs</b> | <b>Cultivars</b> | <b>Chromosomes/scaffolds</b>  | <b>Physical positions (bp)</b> | <b>SNPs</b> |
|-------------|----------------|------------------|-------------------------------|--------------------------------|-------------|
| 15131       | CakSNP15131    | <i>Kabuli</i>    | <i>Ca_Kabuli_Scaffold2763</i> | 25771                          | (T/G)       |
| 15132       | CakSNP15132    | <i>Kabuli</i>    | <i>Ca_Kabuli_Scaffold2763</i> | 43207                          | (G/A)       |
| 15133       | CakSNP15133    | <i>Kabuli</i>    | <i>Ca_Kabuli_Scaffold2763</i> | 49533                          | (T/A)       |
| 15134       | CakSNP15134    | <i>Kabuli</i>    | <i>Ca_Kabuli_Scaffold2763</i> | 82193                          | (C/A)       |
| 15135       | CakSNP15135    | <i>Kabuli</i>    | <i>Ca_Kabuli_Scaffold2763</i> | 82232                          | (C/T)       |
| 15136       | CakSNP15136    | <i>Kabuli</i>    | <i>Ca_Kabuli_Scaffold2763</i> | 82249                          | (G/A)       |
| 15137       | CakSNP15137    | <i>Kabuli</i>    | <i>Ca_Kabuli_Scaffold2763</i> | 82250                          | (T/C)       |
| 15138       | CakSNP15138    | <i>Kabuli</i>    | <i>Ca_Kabuli_Scaffold2763</i> | 82253                          | (G/C)       |
| 15139       | CakSNP15139    | <i>Kabuli</i>    | <i>Ca_Kabuli_Scaffold2763</i> | 82262                          | (G/C)       |
| 15140       | CakSNP15140    | <i>Kabuli</i>    | <i>Ca_Kabuli_Scaffold2763</i> | 82261                          | (C/G)       |
| 15141       | CakSNP15141    | <i>Kabuli</i>    | <i>Ca_Kabuli_Scaffold2763</i> | 82265                          | (G/T)       |
| 15142       | CakSNP15142    | <i>Kabuli</i>    | <i>Ca_Kabuli_Scaffold2763</i> | 82302                          | (T/A)       |
| 15143       | CakSNP15143    | <i>Kabuli</i>    | <i>Ca_Kabuli_Scaffold2763</i> | 82319                          | (T/C)       |
| 15144       | CakSNP15144    | <i>Kabuli</i>    | <i>Ca_Kabuli_Scaffold2763</i> | 82328                          | (A/G)       |
| 15145       | CakSNP15145    | <i>Kabuli</i>    | <i>Ca_Kabuli_Scaffold2763</i> | 82342                          | (C/T)       |
| 15146       | CakSNP15146    | <i>Kabuli</i>    | <i>Ca_Kabuli_Scaffold2763</i> | 82369                          | (G/A)       |
| 15147       | CakSNP15147    | <i>Kabuli</i>    | <i>Ca_Kabuli_Scaffold2763</i> | 82417                          | (C/T)       |
| 15148       | CakSNP15148    | <i>Kabuli</i>    | <i>Ca_Kabuli_Scaffold2763</i> | 82397                          | (T/C)       |
| 15149       | CakSNP15149    | <i>Kabuli</i>    | <i>Ca_Kabuli_Scaffold2763</i> | 95823                          | (G/A)       |
| 15150       | CakSNP15150    | <i>Kabuli</i>    | <i>Ca_Kabuli_Scaffold2763</i> | 99364                          | (A/G)       |
| 15151       | CakSNP15151    | <i>Kabuli</i>    | <i>Ca_Kabuli_Scaffold2763</i> | 99368                          | (C/G)       |
| 15152       | CakSNP15152    | <i>Kabuli</i>    | <i>Ca_Kabuli_Scaffold2763</i> | 99549                          | (C/A)       |
| 15153       | CakSNP15153    | <i>Kabuli</i>    | <i>Ca_Kabuli_Scaffold2763</i> | 104549                         | (G/C)       |
| 15154       | CakSNP15154    | <i>Kabuli</i>    | <i>Ca_Kabuli_Scaffold2763</i> | 104583                         | (T/C)       |
| 15155       | CakSNP15155    | <i>Kabuli</i>    | <i>Ca_Kabuli_Scaffold2763</i> | 107087                         | (A/G)       |
| 15156       | CakSNP15156    | <i>Kabuli</i>    | <i>Ca_Kabuli_Scaffold2763</i> | 107033                         | (T/A)       |
| 15157       | CakSNP15157    | <i>Kabuli</i>    | <i>Ca_Kabuli_Scaffold2763</i> | 107314                         | (A/G)       |
| 15158       | CakSNP15158    | <i>Kabuli</i>    | <i>Ca_Kabuli_Scaffold2763</i> | 107437                         | (T/C)       |
| 15159       | CakSNP15159    | <i>Kabuli</i>    | <i>Ca_Kabuli_Scaffold2763</i> | 107376                         | (C/T)       |
| 15160       | CakSNP15160    | <i>Kabuli</i>    | <i>Ca_Kabuli_Scaffold2763</i> | 107413                         | (A/G)       |
| 15161       | CakSNP15161    | <i>Kabuli</i>    | <i>Ca_Kabuli_Scaffold2763</i> | 108560                         | (T/G)       |
| 15162       | CakSNP15162    | <i>Kabuli</i>    | <i>Ca_Kabuli_Scaffold2763</i> | 108599                         | (T/A)       |
| 15163       | CakSNP15163    | <i>Kabuli</i>    | <i>Ca_Kabuli_Scaffold2763</i> | 108763                         | (T/G)       |
| 15164       | CakSNP15164    | <i>Kabuli</i>    | <i>Ca_Kabuli_Scaffold2763</i> | 117440                         | (C/T)       |
| 15165       | CakSNP15165    | <i>Kabuli</i>    | <i>Ca_Kabuli_Scaffold2763</i> | 117430                         | (A/C)       |
| 15166       | CakSNP15166    | <i>Kabuli</i>    | <i>Ca_Kabuli_Scaffold2763</i> | 125716                         | (C/T)       |
| 15167       | CakSNP15167    | <i>Kabuli</i>    | <i>Ca_Kabuli_Scaffold280</i>  | 90875                          | (G/A)       |
| 15168       | CakSNP15168    | <i>Kabuli</i>    | <i>Ca_Kabuli_Scaffold280</i>  | 90950                          | (C/A)       |
| 15169       | CakSNP15169    | <i>Kabuli</i>    | <i>Ca_Kabuli_Scaffold280</i>  | 99357                          | (A/C)       |

| <b>S.N.</b> | <b>SNP IDs</b> | <b>Cultivars</b> | <b>Chromosomes/scaffolds</b>  | <b>Physical positions (bp)</b> | <b>SNPs</b> |
|-------------|----------------|------------------|-------------------------------|--------------------------------|-------------|
| 15170       | CakSNP15170    | <i>Kabuli</i>    | <i>Ca_Kabuli_Scaffold280</i>  | 101752                         | (G/C)       |
| 15171       | CakSNP15171    | <i>Kabuli</i>    | <i>Ca_Kabuli_Scaffold280</i>  | 111160                         | (C/A)       |
| 15172       | CakSNP15172    | <i>Kabuli</i>    | <i>Ca_Kabuli_Scaffold2812</i> | 56649                          | (C/T)       |
| 15173       | CakSNP15173    | <i>Kabuli</i>    | <i>Ca_Kabuli_Scaffold2812</i> | 56658                          | (G/A)       |
| 15174       | CakSNP15174    | <i>Kabuli</i>    | <i>Ca_Kabuli_Scaffold2812</i> | 56672                          | (C/G)       |
| 15175       | CakSNP15175    | <i>Kabuli</i>    | <i>Ca_Kabuli_Scaffold2812</i> | 56702                          | (G/A)       |
| 15176       | CakSNP15176    | <i>Kabuli</i>    | <i>Ca_Kabuli_Scaffold2812</i> | 56714                          | (G/C)       |
| 15177       | CakSNP15177    | <i>Kabuli</i>    | <i>Ca_Kabuli_Scaffold2812</i> | 56648                          | (C/G)       |
| 15178       | CakSNP15178    | <i>Kabuli</i>    | <i>Ca_Kabuli_Scaffold2812</i> | 89844                          | (A/C)       |
| 15179       | CakSNP15179    | <i>Kabuli</i>    | <i>Ca_Kabuli_Scaffold2812</i> | 89940                          | (C/T)       |
| 15180       | CakSNP15180    | <i>Kabuli</i>    | <i>Ca_Kabuli_Scaffold2812</i> | 89888                          | (T/A)       |
| 15181       | CakSNP15181    | <i>Kabuli</i>    | <i>Ca_Kabuli_Scaffold2812</i> | 89887                          | (A/T)       |
| 15182       | CakSNP15182    | <i>Kabuli</i>    | <i>Ca_Kabuli_Scaffold2815</i> | 25626                          | (C/G)       |
| 15183       | CakSNP15183    | <i>Kabuli</i>    | <i>Ca_Kabuli_Scaffold2815</i> | 25655                          | (T/G)       |
| 15184       | CakSNP15184    | <i>Kabuli</i>    | <i>Ca_Kabuli_Scaffold2815</i> | 25668                          | (T/G)       |
| 15185       | CakSNP15185    | <i>Kabuli</i>    | <i>Ca_Kabuli_Scaffold2827</i> | 171                            | (C/T)       |
| 15186       | CakSNP15186    | <i>Kabuli</i>    | <i>Ca_Kabuli_Scaffold2827</i> | 172                            | (G/A)       |
| 15187       | CakSNP15187    | <i>Kabuli</i>    | <i>Ca_Kabuli_Scaffold2827</i> | 179                            | (T/G)       |
| 15188       | CakSNP15188    | <i>Kabuli</i>    | <i>Ca_Kabuli_Scaffold2827</i> | 210                            | (A/G)       |
| 15189       | CakSNP15189    | <i>Kabuli</i>    | <i>Ca_Kabuli_Scaffold2827</i> | 285                            | (T/G)       |
| 15190       | CakSNP15190    | <i>Kabuli</i>    | <i>Ca_Kabuli_Scaffold2827</i> | 258                            | (T/C)       |
| 15191       | CakSNP15191    | <i>Kabuli</i>    | <i>Ca_Kabuli_Scaffold2827</i> | 240                            | (T/G)       |
| 15192       | CakSNP15192    | <i>Kabuli</i>    | <i>Ca_Kabuli_Scaffold2827</i> | 222                            | (C/T)       |
| 15193       | CakSNP15193    | <i>Kabuli</i>    | <i>Ca_Kabuli_Scaffold284</i>  | 242841                         | (A/T)       |
| 15194       | CakSNP15194    | <i>Kabuli</i>    | <i>Ca_Kabuli_Scaffold284</i>  | 242778                         | (T/C)       |
| 15195       | CakSNP15195    | <i>Kabuli</i>    | <i>Ca_Kabuli_Scaffold284</i>  | 522764                         | (T/G)       |
| 15196       | CakSNP15196    | <i>Kabuli</i>    | <i>Ca_Kabuli_Scaffold284</i>  | 613764                         | (G/A)       |
| 15197       | CakSNP15197    | <i>Kabuli</i>    | <i>Ca_Kabuli_Scaffold284</i>  | 613861                         | (C/T)       |
| 15198       | CakSNP15198    | <i>Kabuli</i>    | <i>Ca_Kabuli_Scaffold284</i>  | 613850                         | (C/T)       |
| 15199       | CakSNP15199    | <i>Kabuli</i>    | <i>Ca_Kabuli_Scaffold284</i>  | 613811                         | (G/A)       |
| 15200       | CakSNP15200    | <i>Kabuli</i>    | <i>Ca_Kabuli_Scaffold284</i>  | 826690                         | (T/C)       |
| 15201       | CakSNP15201    | <i>Kabuli</i>    | <i>Ca_Kabuli_Scaffold284</i>  | 826644                         | (G/A)       |
| 15202       | CakSNP15202    | <i>Kabuli</i>    | <i>Ca_Kabuli_Scaffold2845</i> | 7107                           | (G/A)       |
| 15203       | CakSNP15203    | <i>Kabuli</i>    | <i>Ca_Kabuli_Scaffold2848</i> | 2403                           | (C/A)       |
| 15204       | CakSNP15204    | <i>Kabuli</i>    | <i>Ca_Kabuli_Scaffold2848</i> | 2444                           | (C/A)       |
| 15205       | CakSNP15205    | <i>Kabuli</i>    | <i>Ca_Kabuli_Scaffold2848</i> | 2517                           | (G/A)       |
| 15206       | CakSNP15206    | <i>Kabuli</i>    | <i>Ca_Kabuli_Scaffold2848</i> | 2464                           | (A/G)       |
| 15207       | CakSNP15207    | <i>Kabuli</i>    | <i>Ca_Kabuli_Scaffold2853</i> | 14852                          | (C/G)       |
| 15208       | CakSNP15208    | <i>Kabuli</i>    | <i>Ca_Kabuli_Scaffold2853</i> | 14916                          | (A/G)       |

| <b>S.N.</b> | <b>SNP IDs</b> | <b>Cultivars</b> | <b>Chromosomes/scaffolds</b>  | <b>Physical positions (bp)</b> | <b>SNPs</b> |
|-------------|----------------|------------------|-------------------------------|--------------------------------|-------------|
| 15209       | CakSNP15209    | <i>Kabuli</i>    | <i>Ca_Kabuli_Scaffold2853</i> | 14917                          | (G/A)       |
| 15210       | CakSNP15210    | <i>Kabuli</i>    | <i>Ca_Kabuli_Scaffold2853</i> | 15100                          | (T/C)       |
| 15211       | CakSNP15211    | <i>Kabuli</i>    | <i>Ca_Kabuli_Scaffold2853</i> | 15086                          | (G/A)       |
| 15212       | CakSNP15212    | <i>Kabuli</i>    | <i>Ca_Kabuli_Scaffold287</i>  | 3224                           | (G/A)       |
| 15213       | CakSNP15213    | <i>Kabuli</i>    | <i>Ca_Kabuli_Scaffold287</i>  | 163600                         | (G/C)       |
| 15214       | CakSNP15214    | <i>Kabuli</i>    | <i>Ca_Kabuli_Scaffold287</i>  | 163591                         | (C/A)       |
| 15215       | CakSNP15215    | <i>Kabuli</i>    | <i>Ca_Kabuli_Scaffold287</i>  | 163576                         | (G/A)       |
| 15216       | CakSNP15216    | <i>Kabuli</i>    | <i>Ca_Kabuli_Scaffold290</i>  | 179998                         | (T/C)       |
| 15217       | CakSNP15217    | <i>Kabuli</i>    | <i>Ca_Kabuli_Scaffold290</i>  | 179993                         | (C/T)       |
| 15218       | CakSNP15218    | <i>Kabuli</i>    | <i>Ca_Kabuli_Scaffold290</i>  | 179984                         | (G/T)       |
| 15219       | CakSNP15219    | <i>Kabuli</i>    | <i>Ca_Kabuli_Scaffold290</i>  | 179940                         | (G/A)       |
| 15220       | CakSNP15220    | <i>Kabuli</i>    | <i>Ca_Kabuli_Scaffold290</i>  | 179937                         | (C/G)       |
| 15221       | CakSNP15221    | <i>Kabuli</i>    | <i>Ca_Kabuli_Scaffold290</i>  | 179969                         | (A/T)       |
| 15222       | CakSNP15222    | <i>Kabuli</i>    | <i>Ca_Kabuli_Scaffold290</i>  | 211634                         | (A/C)       |
| 15223       | CakSNP15223    | <i>Kabuli</i>    | <i>Ca_Kabuli_Scaffold290</i>  | 212536                         | (A/C)       |
| 15224       | CakSNP15224    | <i>Kabuli</i>    | <i>Ca_Kabuli_Scaffold290</i>  | 212514                         | (C/T)       |
| 15225       | CakSNP15225    | <i>Kabuli</i>    | <i>Ca_Kabuli_Scaffold290</i>  | 255161                         | (G/A)       |
| 15226       | CakSNP15226    | <i>Kabuli</i>    | <i>Ca_Kabuli_Scaffold290</i>  | 728010                         | (T/A)       |
| 15227       | CakSNP15227    | <i>Kabuli</i>    | <i>Ca_Kabuli_Scaffold290</i>  | 824906                         | (C/T)       |
| 15228       | CakSNP15228    | <i>Kabuli</i>    | <i>Ca_Kabuli_Scaffold2907</i> | 31202                          | (G/A)       |
| 15229       | CakSNP15229    | <i>Kabuli</i>    | <i>Ca_Kabuli_Scaffold2950</i> | 32650                          | (C/T)       |
| 15230       | CakSNP15230    | <i>Kabuli</i>    | <i>Ca_Kabuli_Scaffold2950</i> | 32703                          | (A/C)       |
| 15231       | CakSNP15231    | <i>Kabuli</i>    | <i>Ca_Kabuli_Scaffold2950</i> | 32739                          | (C/A)       |
| 15232       | CakSNP15232    | <i>Kabuli</i>    | <i>Ca_Kabuli_Scaffold2950</i> | 32776                          | (T/A)       |
| 15233       | CakSNP15233    | <i>Kabuli</i>    | <i>Ca_Kabuli_Scaffold2950</i> | 33081                          | (A/G)       |
| 15234       | CakSNP15234    | <i>Kabuli</i>    | <i>Ca_Kabuli_Scaffold2950</i> | 33207                          | (C/T)       |
| 15235       | CakSNP15235    | <i>Kabuli</i>    | <i>Ca_Kabuli_Scaffold296</i>  | 41422                          | (T/G)       |
| 15236       | CakSNP15236    | <i>Kabuli</i>    | <i>Ca_Kabuli_Scaffold296</i>  | 59691                          | (G/A)       |
| 15237       | CakSNP15237    | <i>Kabuli</i>    | <i>Ca_Kabuli_Scaffold296</i>  | 59758                          | (A/G)       |
| 15238       | CakSNP15238    | <i>Kabuli</i>    | <i>Ca_Kabuli_Scaffold296</i>  | 59883                          | (A/C)       |
| 15239       | CakSNP15239    | <i>Kabuli</i>    | <i>Ca_Kabuli_Scaffold296</i>  | 361664                         | (T/C)       |
| 15240       | CakSNP15240    | <i>Kabuli</i>    | <i>Ca_Kabuli_Scaffold299</i>  | 199050                         | (A/T)       |
| 15241       | CakSNP15241    | <i>Kabuli</i>    | <i>Ca_Kabuli_Scaffold299</i>  | 199067                         | (A/T)       |
| 15242       | CakSNP15242    | <i>Kabuli</i>    | <i>Ca_Kabuli_Scaffold299</i>  | 199068                         | (G/T)       |
| 15243       | CakSNP15243    | <i>Kabuli</i>    | <i>Ca_Kabuli_Scaffold299</i>  | 199087                         | (G/A)       |
| 15244       | CakSNP15244    | <i>Kabuli</i>    | <i>Ca_Kabuli_Scaffold299</i>  | 199073                         | (G/A)       |
| 15245       | CakSNP15245    | <i>Kabuli</i>    | <i>Ca_Kabuli_Scaffold299</i>  | 204540                         | (G/A)       |
| 15246       | CakSNP15246    | <i>Kabuli</i>    | <i>Ca_Kabuli_Scaffold300</i>  | 111914                         | (C/T)       |
| 15247       | CakSNP15247    | <i>Kabuli</i>    | <i>Ca_Kabuli_Scaffold300</i>  | 111924                         | (C/T)       |



| <b>S.N.</b> | <b>SNP IDs</b> | <b>Cultivars</b> | <b>Chromosomes/scaffolds</b>   | <b>Physical positions (bp)</b> | <b>SNPs</b> |
|-------------|----------------|------------------|--------------------------------|--------------------------------|-------------|
| 15248       | CakSNP15248    | <i>Kabuli</i>    | <i>Ca_Kabuli_Scaffold300</i>   | 111926                         | (G/A)       |
| 15249       | CakSNP15249    | <i>Kabuli</i>    | <i>Ca_Kabuli_Scaffold300</i>   | 111933                         | (C/T)       |
| 15250       | CakSNP15250    | <i>Kabuli</i>    | <i>Ca_Kabuli_Scaffold300</i>   | 111936                         | (C/A)       |
| 15251       | CakSNP15251    | <i>Kabuli</i>    | <i>Ca_Kabuli_Scaffold300</i>   | 111972                         | (A/T)       |
| 15252       | CakSNP15252    | <i>Kabuli</i>    | <i>Ca_Kabuli_Scaffold300</i>   | 111973                         | (A/T)       |
| 15253       | CakSNP15253    | <i>Kabuli</i>    | <i>Ca_Kabuli_Scaffold300</i>   | 111976                         | (C/T)       |
| 15254       | CakSNP15254    | <i>Kabuli</i>    | <i>Ca_Kabuli_Scaffold300</i>   | 112011                         | (T/C)       |
| 15255       | CakSNP15255    | <i>Kabuli</i>    | <i>Ca_Kabuli_Scaffold300</i>   | 112006                         | (G/A)       |
| 15256       | CakSNP15256    | <i>Kabuli</i>    | <i>Ca_Kabuli_Scaffold300</i>   | 112005                         | (G/A)       |
| 15257       | CakSNP15257    | <i>Kabuli</i>    | <i>Ca_Kabuli_Scaffold300</i>   | 111959                         | (C/T)       |
| 15258       | CakSNP15258    | <i>Kabuli</i>    | <i>Ca_Kabuli_Scaffold300</i>   | 111964                         | (C/T)       |
| 15259       | CakSNP15259    | <i>Kabuli</i>    | <i>Ca_Kabuli_Scaffold3016</i>  | 32790                          | (C/T)       |
| 15260       | CakSNP15260    | <i>Kabuli</i>    | <i>Ca_Kabuli_Scaffold303</i>   | 18213                          | (G/A)       |
| 15261       | CakSNP15261    | <i>Kabuli</i>    | <i>Ca_Kabuli_Scaffold305</i>   | 49263                          | (G/A)       |
| 15262       | CakSNP15262    | <i>Kabuli</i>    | <i>Ca_Kabuli_Scaffold305</i>   | 49266                          | (T/G)       |
| 15263       | CakSNP15263    | <i>Kabuli</i>    | <i>Ca_Kabuli_Scaffold305</i>   | 49278                          | (C/A)       |
| 15264       | CakSNP15264    | <i>Kabuli</i>    | <i>Ca_Kabuli_Scaffold305</i>   | 138929                         | (G/A)       |
| 15265       | CakSNP15265    | <i>Kabuli</i>    | <i>Ca_Kabuli_Scaffold306</i>   | 15514                          | (C/T)       |
| 15266       | CakSNP15266    | <i>Kabuli</i>    | <i>Ca_Kabuli_Scaffold306</i>   | 19215                          | (C/A)       |
| 15267       | CakSNP15267    | <i>Kabuli</i>    | <i>Ca_Kabuli_Scaffold306</i>   | 85993                          | (T/A)       |
| 15268       | CakSNP15268    | <i>Kabuli</i>    | <i>Ca_Kabuli_Scaffold306</i>   | 88389                          | (T/A)       |
| 15269       | CakSNP15269    | <i>Kabuli</i>    | <i>Ca_Kabuli_Scaffold3084</i>  | 4409                           | (G/A)       |
| 15270       | CakSNP15270    | <i>Kabuli</i>    | <i>Ca_Kabuli_Scaffold308_2</i> | 9421                           | (G/A)       |
| 15271       | CakSNP15271    | <i>Kabuli</i>    | <i>Ca_Kabuli_Scaffold308_2</i> | 143696                         | (C/G)       |
| 15272       | CakSNP15272    | <i>Kabuli</i>    | <i>Ca_Kabuli_Scaffold308_2</i> | 143813                         | (C/G)       |
| 15273       | CakSNP15273    | <i>Kabuli</i>    | <i>Ca_Kabuli_Scaffold308_2</i> | 144354                         | (C/T)       |
| 15274       | CakSNP15274    | <i>Kabuli</i>    | <i>Ca_Kabuli_Scaffold308_2</i> | 144508                         | (C/T)       |
| 15275       | CakSNP15275    | <i>Kabuli</i>    | <i>Ca_Kabuli_Scaffold308_2</i> | 145639                         | (G/T)       |
| 15276       | CakSNP15276    | <i>Kabuli</i>    | <i>Ca_Kabuli_Scaffold308_2</i> | 152546                         | (A/G)       |
| 15277       | CakSNP15277    | <i>Kabuli</i>    | <i>Ca_Kabuli_Scaffold308_2</i> | 152576                         | (G/T)       |
| 15278       | CakSNP15278    | <i>Kabuli</i>    | <i>Ca_Kabuli_Scaffold311</i>   | 86652                          | (C/A)       |
| 15279       | CakSNP15279    | <i>Kabuli</i>    | <i>Ca_Kabuli_Scaffold311</i>   | 86677                          | (C/T)       |
| 15280       | CakSNP15280    | <i>Kabuli</i>    | <i>Ca_Kabuli_Scaffold311</i>   | 86658                          | (C/T)       |
| 15281       | CakSNP15281    | <i>Kabuli</i>    | <i>Ca_Kabuli_Scaffold311</i>   | 86670                          | (G/A)       |
| 15282       | CakSNP15282    | <i>Kabuli</i>    | <i>Ca_Kabuli_Scaffold3116</i>  | 159                            | (T/G)       |
| 15283       | CakSNP15283    | <i>Kabuli</i>    | <i>Ca_Kabuli_Scaffold314</i>   | 432453                         | (T/C)       |
| 15284       | CakSNP15284    | <i>Kabuli</i>    | <i>Ca_Kabuli_Scaffold314</i>   | 432471                         | (A/G)       |
| 15285       | CakSNP15285    | <i>Kabuli</i>    | <i>Ca_Kabuli_Scaffold314</i>   | 535269                         | (A/C)       |
| 15286       | CakSNP15286    | <i>Kabuli</i>    | <i>Ca_Kabuli_Scaffold314</i>   | 535266                         | (A/C)       |

| <b>S.N.</b> | <b>SNP IDs</b> | <b>Cultivars</b> | <b>Chromosomes/scaffolds</b>    | <b>Physical positions (bp)</b> | <b>SNPs</b> |
|-------------|----------------|------------------|---------------------------------|--------------------------------|-------------|
| 15287       | CakSNP15287    | <i>Kabuli</i>    | <i>Ca_Kabuli_Scaffold314</i>    | 535263                         | (T/C)       |
| 15288       | CakSNP15288    | <i>Kabuli</i>    | <i>Ca_Kabuli_Scaffold314</i>    | 610535                         | (C/G)       |
| 15289       | CakSNP15289    | <i>Kabuli</i>    | <i>Ca_Kabuli_Scaffold314</i>    | 624361                         | (C/T)       |
| 15290       | CakSNP15290    | <i>Kabuli</i>    | <i>Ca_Kabuli_Scaffold3155</i>   | 7438                           | (A/C)       |
| 15291       | CakSNP15291    | <i>Kabuli</i>    | <i>Ca_Kabuli_Scaffold3155</i>   | 7442                           | (T/C)       |
| 15292       | CakSNP15292    | <i>Kabuli</i>    | <i>Ca_Kabuli_Scaffold3155</i>   | 7443                           | (A/G)       |
| 15293       | CakSNP15293    | <i>Kabuli</i>    | <i>Ca_Kabuli_Scaffold3155</i>   | 7444                           | (A/G)       |
| 15294       | CakSNP15294    | <i>Kabuli</i>    | <i>Ca_Kabuli_Scaffold3155</i>   | 7455                           | (T/G)       |
| 15295       | CakSNP15295    | <i>Kabuli</i>    | <i>Ca_Kabuli_Scaffold3155</i>   | 7462                           | (A/G)       |
| 15296       | CakSNP15296    | <i>Kabuli</i>    | <i>Ca_Kabuli_Scaffold3155</i>   | 7464                           | (T/A)       |
| 15297       | CakSNP15297    | <i>Kabuli</i>    | <i>Ca_Kabuli_Scaffold3155</i>   | 7472                           | (A/G)       |
| 15298       | CakSNP15298    | <i>Kabuli</i>    | <i>Ca_Kabuli_Scaffold3155</i>   | 7477                           | (C/G)       |
| 15299       | CakSNP15299    | <i>Kabuli</i>    | <i>Ca_Kabuli_Scaffold3155</i>   | 7480                           | (G/A)       |
| 15300       | CakSNP15300    | <i>Kabuli</i>    | <i>Ca_Kabuli_Scaffold3155</i>   | 9404                           | (C/T)       |
| 15301       | CakSNP15301    | <i>Kabuli</i>    | <i>Ca_Kabuli_Scaffold3155</i>   | 9746                           | (A/T)       |
| 15302       | CakSNP15302    | <i>Kabuli</i>    | <i>Ca_Kabuli_Scaffold3170</i>   | 56261                          | (A/G)       |
| 15303       | CakSNP15303    | <i>Kabuli</i>    | <i>Ca_Kabuli_Scaffold322</i>    | 55475                          | (G/A)       |
| 15304       | CakSNP15304    | <i>Kabuli</i>    | <i>Ca_Kabuli_Scaffold322</i>    | 55479                          | (G/T)       |
| 15305       | CakSNP15305    | <i>Kabuli</i>    | <i>Ca_Kabuli_Scaffold322</i>    | 55589                          | (A/T)       |
| 15306       | CakSNP15306    | <i>Kabuli</i>    | <i>Ca_Kabuli_Scaffold3228</i>   | 2926                           | (C/T)       |
| 15307       | CakSNP15307    | <i>Kabuli</i>    | <i>Ca_Kabuli_Scaffold3228</i>   | 23138                          | (A/G)       |
| 15308       | CakSNP15308    | <i>Kabuli</i>    | <i>Ca_Kabuli_Scaffold3228</i>   | 23190                          | (G/C)       |
| 15309       | CakSNP15309    | <i>Kabuli</i>    | <i>Ca_Kabuli_Scaffold3228</i>   | 23315                          | (C/A)       |
| 15310       | CakSNP15310    | <i>Kabuli</i>    | <i>Ca_Kabuli_Scaffold3228</i>   | 23270                          | (A/C)       |
| 15311       | CakSNP15311    | <i>Kabuli</i>    | <i>Ca_Kabuli_Scaffold324</i>    | 15569                          | (A/C)       |
| 15312       | CakSNP15312    | <i>Kabuli</i>    | <i>Ca_Kabuli_Scaffold324</i>    | 15574                          | (G/A)       |
| 15313       | CakSNP15313    | <i>Kabuli</i>    | <i>Ca_Kabuli_Scaffold324</i>    | 15575                          | (G/C)       |
| 15314       | CakSNP15314    | <i>Kabuli</i>    | <i>Ca_Kabuli_Scaffold324</i>    | 15581                          | (G/C)       |
| 15315       | CakSNP15315    | <i>Kabuli</i>    | <i>Ca_Kabuli_Scaffold324</i>    | 15590                          | (G/T)       |
| 15316       | CakSNP15316    | <i>Kabuli</i>    | <i>Ca_Kabuli_Scaffold324</i>    | 15593                          | (G/A)       |
| 15317       | CakSNP15317    | <i>Kabuli</i>    | <i>Ca_Kabuli_Scaffold324</i>    | 15594                          | (C/A)       |
| 15318       | CakSNP15318    | <i>Kabuli</i>    | <i>Ca_Kabuli_Scaffold324</i>    | 15614                          | (C/T)       |
| 15319       | CakSNP15319    | <i>Kabuli</i>    | <i>Ca_Kabuli_Scaffold324</i>    | 15619                          | (A/G)       |
| 15320       | CakSNP15320    | <i>Kabuli</i>    | <i>Ca_Kabuli_Scaffold324</i>    | 15636                          | (G/A)       |
| 15321       | CakSNP15321    | <i>Kabuli</i>    | <i>Ca_Kabuli_Scaffold3254_2</i> | 15616                          | (A/G)       |
| 15322       | CakSNP15322    | <i>Kabuli</i>    | <i>Ca_Kabuli_Scaffold3254_2</i> | 28089                          | (T/C)       |
| 15323       | CakSNP15323    | <i>Kabuli</i>    | <i>Ca_Kabuli_Scaffold3254_2</i> | 31210                          | (T/A)       |
| 15324       | CakSNP15324    | <i>Kabuli</i>    | <i>Ca_Kabuli_Scaffold3254_2</i> | 31217                          | (C/T)       |
| 15325       | CakSNP15325    | <i>Kabuli</i>    | <i>Ca_Kabuli_Scaffold3254_2</i> | 31219                          | (A/C)       |

| <b>S.N.</b> | <b>SNP IDs</b> | <b>Cultivars</b> | <b>Chromosomes/scaffolds</b>    | <b>Physical positions (bp)</b> | <b>SNPs</b> |
|-------------|----------------|------------------|---------------------------------|--------------------------------|-------------|
| 15326       | CakSNP15326    | <i>Kabuli</i>    | <i>Ca_Kabuli_Scaffold3254_2</i> | 31224                          | (T/G)       |
| 15327       | CakSNP15327    | <i>Kabuli</i>    | <i>Ca_Kabuli_Scaffold3254_2</i> | 31229                          | (G/T)       |
| 15328       | CakSNP15328    | <i>Kabuli</i>    | <i>Ca_Kabuli_Scaffold3254_2</i> | 31242                          | (C/A)       |
| 15329       | CakSNP15329    | <i>Kabuli</i>    | <i>Ca_Kabuli_Scaffold3254_2</i> | 31344                          | (A/G)       |
| 15330       | CakSNP15330    | <i>Kabuli</i>    | <i>Ca_Kabuli_Scaffold3254_2</i> | 31325                          | (T/A)       |
| 15331       | CakSNP15331    | <i>Kabuli</i>    | <i>Ca_Kabuli_Scaffold3254_2</i> | 31322                          | (G/A)       |
| 15332       | CakSNP15332    | <i>Kabuli</i>    | <i>Ca_Kabuli_Scaffold3254_2</i> | 31311                          | (G/A)       |
| 15333       | CakSNP15333    | <i>Kabuli</i>    | <i>Ca_Kabuli_Scaffold3254_2</i> | 31303                          | (T/C)       |
| 15334       | CakSNP15334    | <i>Kabuli</i>    | <i>Ca_Kabuli_Scaffold3254_2</i> | 39157                          | (T/A)       |
| 15335       | CakSNP15335    | <i>Kabuli</i>    | <i>Ca_Kabuli_Scaffold3254_2</i> | 46644                          | (G/A)       |
| 15336       | CakSNP15336    | <i>Kabuli</i>    | <i>Ca_Kabuli_Scaffold3254_2</i> | 186218                         | (G/A)       |
| 15337       | CakSNP15337    | <i>Kabuli</i>    | <i>Ca_Kabuli_Scaffold3254_2</i> | 186203                         | (C/G)       |
| 15338       | CakSNP15338    | <i>Kabuli</i>    | <i>Ca_Kabuli_Scaffold3254_2</i> | 186243                         | (A/C)       |
| 15339       | CakSNP15339    | <i>Kabuli</i>    | <i>Ca_Kabuli_Scaffold3284</i>   | 2735                           | (T/C)       |
| 15340       | CakSNP15340    | <i>Kabuli</i>    | <i>Ca_Kabuli_Scaffold332</i>    | 203691                         | (T/A)       |
| 15341       | CakSNP15341    | <i>Kabuli</i>    | <i>Ca_Kabuli_Scaffold332</i>    | 204783                         | (A/G)       |
| 15342       | CakSNP15342    | <i>Kabuli</i>    | <i>Ca_Kabuli_Scaffold332</i>    | 204785                         | (G/A)       |
| 15343       | CakSNP15343    | <i>Kabuli</i>    | <i>Ca_Kabuli_Scaffold332</i>    | 204952                         | (G/A)       |
| 15344       | CakSNP15344    | <i>Kabuli</i>    | <i>Ca_Kabuli_Scaffold3321</i>   | 17935                          | (C/A)       |
| 15345       | CakSNP15345    | <i>Kabuli</i>    | <i>Ca_Kabuli_Scaffold3337</i>   | 17963                          | (C/T)       |
| 15346       | CakSNP15346    | <i>Kabuli</i>    | <i>Ca_Kabuli_Scaffold3337</i>   | 17999                          | (T/G)       |
| 15347       | CakSNP15347    | <i>Kabuli</i>    | <i>Ca_Kabuli_Scaffold3337</i>   | 18022                          | (C/T)       |
| 15348       | CakSNP15348    | <i>Kabuli</i>    | <i>Ca_Kabuli_Scaffold3337</i>   | 18026                          | (T/A)       |
| 15349       | CakSNP15349    | <i>Kabuli</i>    | <i>Ca_Kabuli_Scaffold3337</i>   | 17959                          | (A/G)       |
| 15350       | CakSNP15350    | <i>Kabuli</i>    | <i>Ca_Kabuli_Scaffold3337</i>   | 17956                          | (G/A)       |
| 15351       | CakSNP15351    | <i>Kabuli</i>    | <i>Ca_Kabuli_Scaffold334</i>    | 43160                          | (G/A)       |
| 15352       | CakSNP15352    | <i>Kabuli</i>    | <i>Ca_Kabuli_Scaffold335</i>    | 60951                          | (T/C)       |
| 15353       | CakSNP15353    | <i>Kabuli</i>    | <i>Ca_Kabuli_Scaffold335</i>    | 60952                          | (T/C)       |
| 15354       | CakSNP15354    | <i>Kabuli</i>    | <i>Ca_Kabuli_Scaffold335</i>    | 60956                          | (T/C)       |
| 15355       | CakSNP15355    | <i>Kabuli</i>    | <i>Ca_Kabuli_Scaffold335</i>    | 60957                          | (T/C)       |
| 15356       | CakSNP15356    | <i>Kabuli</i>    | <i>Ca_Kabuli_Scaffold335</i>    | 60960                          | (T/C)       |
| 15357       | CakSNP15357    | <i>Kabuli</i>    | <i>Ca_Kabuli_Scaffold335</i>    | 60961                          | (C/T)       |
| 15358       | CakSNP15358    | <i>Kabuli</i>    | <i>Ca_Kabuli_Scaffold335</i>    | 60962                          | (T/G)       |
| 15359       | CakSNP15359    | <i>Kabuli</i>    | <i>Ca_Kabuli_Scaffold335</i>    | 60906                          | (T/G)       |
| 15360       | CakSNP15360    | <i>Kabuli</i>    | <i>Ca_Kabuli_Scaffold335</i>    | 135942                         | (T/A)       |
| 15361       | CakSNP15361    | <i>Kabuli</i>    | <i>Ca_Kabuli_Scaffold335</i>    | 136017                         | (C/G)       |
| 15362       | CakSNP15362    | <i>Kabuli</i>    | <i>Ca_Kabuli_Scaffold335</i>    | 135969                         | (C/T)       |
| 15363       | CakSNP15363    | <i>Kabuli</i>    | <i>Ca_Kabuli_Scaffold335</i>    | 135976                         | (C/T)       |
| 15364       | CakSNP15364    | <i>Kabuli</i>    | <i>Ca_Kabuli_Scaffold335</i>    | 136077                         | (G/C)       |

| <b>S.N.</b> | <b>SNP IDs</b> | <b>Cultivars</b> | <b>Chromosomes/scaffolds</b>   | <b>Physical positions (bp)</b> | <b>SNPs</b> |
|-------------|----------------|------------------|--------------------------------|--------------------------------|-------------|
| 15365       | CakSNP15365    | <i>Kabuli</i>    | <i>Ca_Kabuli_Scaffold335</i>   | 136076                         | (G/C)       |
| 15366       | CakSNP15366    | <i>Kabuli</i>    | <i>Ca_Kabuli_Scaffold335</i>   | 136073                         | (G/A)       |
| 15367       | CakSNP15367    | <i>Kabuli</i>    | <i>Ca_Kabuli_Scaffold335</i>   | 136051                         | (T/A)       |
| 15368       | CakSNP15368    | <i>Kabuli</i>    | <i>Ca_Kabuli_Scaffold335</i>   | 136030                         | (G/A)       |
| 15369       | CakSNP15369    | <i>Kabuli</i>    | <i>Ca_Kabuli_Scaffold335</i>   | 136129                         | (T/C)       |
| 15370       | CakSNP15370    | <i>Kabuli</i>    | <i>Ca_Kabuli_Scaffold335</i>   | 136109                         | (G/T)       |
| 15371       | CakSNP15371    | <i>Kabuli</i>    | <i>Ca_Kabuli_Scaffold335</i>   | 136106                         | (G/A)       |
| 15372       | CakSNP15372    | <i>Kabuli</i>    | <i>Ca_Kabuli_Scaffold335</i>   | 136096                         | (T/C)       |
| 15373       | CakSNP15373    | <i>Kabuli</i>    | <i>Ca_Kabuli_Scaffold335</i>   | 136091                         | (G/A)       |
| 15374       | CakSNP15374    | <i>Kabuli</i>    | <i>Ca_Kabuli_Scaffold336</i>   | 468863                         | (T/A)       |
| 15375       | CakSNP15375    | <i>Kabuli</i>    | <i>Ca_Kabuli_Scaffold336</i>   | 563363                         | (C/T)       |
| 15376       | CakSNP15376    | <i>Kabuli</i>    | <i>Ca_Kabuli_Scaffold336</i>   | 618427                         | (C/T)       |
| 15377       | CakSNP15377    | <i>Kabuli</i>    | <i>Ca_Kabuli_Scaffold336</i>   | 771169                         | (C/T)       |
| 15378       | CakSNP15378    | <i>Kabuli</i>    | <i>Ca_Kabuli_Scaffold336</i>   | 771175                         | (C/T)       |
| 15379       | CakSNP15379    | <i>Kabuli</i>    | <i>Ca_Kabuli_Scaffold3362</i>  | 69878                          | (C/A)       |
| 15380       | CakSNP15380    | <i>Kabuli</i>    | <i>Ca_Kabuli_Scaffold338</i>   | 14666                          | (T/G)       |
| 15381       | CakSNP15381    | <i>Kabuli</i>    | <i>Ca_Kabuli_Scaffold3397</i>  | 45363                          | (T/C)       |
| 15382       | CakSNP15382    | <i>Kabuli</i>    | <i>Ca_Kabuli_Scaffold342</i>   | 311411                         | (G/A)       |
| 15383       | CakSNP15383    | <i>Kabuli</i>    | <i>Ca_Kabuli_Scaffold342</i>   | 311394                         | (A/C)       |
| 15384       | CakSNP15384    | <i>Kabuli</i>    | <i>Ca_Kabuli_Scaffold342</i>   | 359376                         | (A/C)       |
| 15385       | CakSNP15385    | <i>Kabuli</i>    | <i>Ca_Kabuli_Scaffold3422</i>  | 13376                          | (T/A)       |
| 15386       | CakSNP15386    | <i>Kabuli</i>    | <i>Ca_Kabuli_Scaffold346_1</i> | 67110                          | (G/T)       |
| 15387       | CakSNP15387    | <i>Kabuli</i>    | <i>Ca_Kabuli_Scaffold346_1</i> | 105461                         | (A/G)       |
| 15388       | CakSNP15388    | <i>Kabuli</i>    | <i>Ca_Kabuli_Scaffold346_1</i> | 105521                         | (A/C)       |
| 15389       | CakSNP15389    | <i>Kabuli</i>    | <i>Ca_Kabuli_Scaffold346_1</i> | 105523                         | (G/A)       |
| 15390       | CakSNP15390    | <i>Kabuli</i>    | <i>Ca_Kabuli_Scaffold346_1</i> | 105546                         | (C/T)       |
| 15391       | CakSNP15391    | <i>Kabuli</i>    | <i>Ca_Kabuli_Scaffold349</i>   | 51381                          | (A/T)       |
| 15392       | CakSNP15392    | <i>Kabuli</i>    | <i>Ca_Kabuli_Scaffold349</i>   | 51396                          | (G/A)       |
| 15393       | CakSNP15393    | <i>Kabuli</i>    | <i>Ca_Kabuli_Scaffold349</i>   | 51414                          | (C/T)       |
| 15394       | CakSNP15394    | <i>Kabuli</i>    | <i>Ca_Kabuli_Scaffold349</i>   | 51435                          | (C/T)       |
| 15395       | CakSNP15395    | <i>Kabuli</i>    | <i>Ca_Kabuli_Scaffold349</i>   | 51548                          | (T/C)       |
| 15396       | CakSNP15396    | <i>Kabuli</i>    | <i>Ca_Kabuli_Scaffold349</i>   | 51637                          | (T/A)       |
| 15397       | CakSNP15397    | <i>Kabuli</i>    | <i>Ca_Kabuli_Scaffold349</i>   | 51624                          | (G/A)       |
| 15398       | CakSNP15398    | <i>Kabuli</i>    | <i>Ca_Kabuli_Scaffold349</i>   | 174027                         | (G/C)       |
| 15399       | CakSNP15399    | <i>Kabuli</i>    | <i>Ca_Kabuli_Scaffold349</i>   | 174039                         | (A/T)       |
| 15400       | CakSNP15400    | <i>Kabuli</i>    | <i>Ca_Kabuli_Scaffold3514</i>  | 42134                          | (G/A)       |
| 15401       | CakSNP15401    | <i>Kabuli</i>    | <i>Ca_Kabuli_Scaffold3514</i>  | 42135                          | (G/T)       |
| 15402       | CakSNP15402    | <i>Kabuli</i>    | <i>Ca_Kabuli_Scaffold3514</i>  | 42156                          | (G/A)       |
| 15403       | CakSNP15403    | <i>Kabuli</i>    | <i>Ca_Kabuli_Scaffold3514</i>  | 42163                          | (T/C)       |

| <b>S.N.</b> | <b>SNP IDs</b> | <b>Cultivars</b> | <b>Chromosomes/scaffolds</b>  | <b>Physical positions (bp)</b> | <b>SNPs</b> |
|-------------|----------------|------------------|-------------------------------|--------------------------------|-------------|
| 15404       | CakSNP15404    | <i>Kabuli</i>    | <i>Ca_Kabuli_Scaffold3514</i> | 42164                          | (A/G)       |
| 15405       | CakSNP15405    | <i>Kabuli</i>    | <i>Ca_Kabuli_Scaffold3514</i> | 42175                          | (G/A)       |
| 15406       | CakSNP15406    | <i>Kabuli</i>    | <i>Ca_Kabuli_Scaffold352</i>  | 22672                          | (C/T)       |
| 15407       | CakSNP15407    | <i>Kabuli</i>    | <i>Ca_Kabuli_Scaffold352</i>  | 22675                          | (G/A)       |
| 15408       | CakSNP15408    | <i>Kabuli</i>    | <i>Ca_Kabuli_Scaffold352</i>  | 22693                          | (C/T)       |
| 15409       | CakSNP15409    | <i>Kabuli</i>    | <i>Ca_Kabuli_Scaffold352</i>  | 22708                          | (A/G)       |
| 15410       | CakSNP15410    | <i>Kabuli</i>    | <i>Ca_Kabuli_Scaffold352</i>  | 22787                          | (A/G)       |
| 15411       | CakSNP15411    | <i>Kabuli</i>    | <i>Ca_Kabuli_Scaffold352</i>  | 22777                          | (T/G)       |
| 15412       | CakSNP15412    | <i>Kabuli</i>    | <i>Ca_Kabuli_Scaffold352</i>  | 22726                          | (A/C)       |
| 15413       | CakSNP15413    | <i>Kabuli</i>    | <i>Ca_Kabuli_Scaffold36</i>   | 167556                         | (C/T)       |
| 15414       | CakSNP15414    | <i>Kabuli</i>    | <i>Ca_Kabuli_Scaffold36</i>   | 226511                         | (A/G)       |
| 15415       | CakSNP15415    | <i>Kabuli</i>    | <i>Ca_Kabuli_Scaffold362</i>  | 84943                          | (A/G)       |
| 15416       | CakSNP15416    | <i>Kabuli</i>    | <i>Ca_Kabuli_Scaffold362</i>  | 84945                          | (T/C)       |
| 15417       | CakSNP15417    | <i>Kabuli</i>    | <i>Ca_Kabuli_Scaffold362</i>  | 84954                          | (T/C)       |
| 15418       | CakSNP15418    | <i>Kabuli</i>    | <i>Ca_Kabuli_Scaffold362</i>  | 84972                          | (C/A)       |
| 15419       | CakSNP15419    | <i>Kabuli</i>    | <i>Ca_Kabuli_Scaffold362</i>  | 84988                          | (T/G)       |
| 15420       | CakSNP15420    | <i>Kabuli</i>    | <i>Ca_Kabuli_Scaffold362</i>  | 84994                          | (G/A)       |
| 15421       | CakSNP15421    | <i>Kabuli</i>    | <i>Ca_Kabuli_Scaffold362</i>  | 164620                         | (C/T)       |
| 15422       | CakSNP15422    | <i>Kabuli</i>    | <i>Ca_Kabuli_Scaffold362</i>  | 164789                         | (T/C)       |
| 15423       | CakSNP15423    | <i>Kabuli</i>    | <i>Ca_Kabuli_Scaffold362</i>  | 164787                         | (C/T)       |
| 15424       | CakSNP15424    | <i>Kabuli</i>    | <i>Ca_Kabuli_Scaffold362</i>  | 196556                         | (G/A)       |
| 15425       | CakSNP15425    | <i>Kabuli</i>    | <i>Ca_Kabuli_Scaffold362</i>  | 219176                         | (T/C)       |
| 15426       | CakSNP15426    | <i>Kabuli</i>    | <i>Ca_Kabuli_Scaffold366</i>  | 61810                          | (C/T)       |
| 15427       | CakSNP15427    | <i>Kabuli</i>    | <i>Ca_Kabuli_Scaffold369</i>  | 162735                         | (T/G)       |
| 15428       | CakSNP15428    | <i>Kabuli</i>    | <i>Ca_Kabuli_Scaffold3693</i> | 81068                          | (C/T)       |
| 15429       | CakSNP15429    | <i>Kabuli</i>    | <i>Ca_Kabuli_Scaffold3693</i> | 81080                          | (C/A)       |
| 15430       | CakSNP15430    | <i>Kabuli</i>    | <i>Ca_Kabuli_Scaffold3693</i> | 81204                          | (C/T)       |
| 15431       | CakSNP15431    | <i>Kabuli</i>    | <i>Ca_Kabuli_Scaffold3724</i> | 68378                          | (G/A)       |
| 15432       | CakSNP15432    | <i>Kabuli</i>    | <i>Ca_Kabuli_Scaffold374</i>  | 132907                         | (A/C)       |
| 15433       | CakSNP15433    | <i>Kabuli</i>    | <i>Ca_Kabuli_Scaffold374</i>  | 132896                         | (T/C)       |
| 15434       | CakSNP15434    | <i>Kabuli</i>    | <i>Ca_Kabuli_Scaffold374</i>  | 132873                         | (A/G)       |
| 15435       | CakSNP15435    | <i>Kabuli</i>    | <i>Ca_Kabuli_Scaffold374</i>  | 132859                         | (C/T)       |
| 15436       | CakSNP15436    | <i>Kabuli</i>    | <i>Ca_Kabuli_Scaffold374</i>  | 132858                         | (G/A)       |
| 15437       | CakSNP15437    | <i>Kabuli</i>    | <i>Ca_Kabuli_Scaffold374</i>  | 132849                         | (A/C)       |
| 15438       | CakSNP15438    | <i>Kabuli</i>    | <i>Ca_Kabuli_Scaffold374</i>  | 132843                         | (C/T)       |
| 15439       | CakSNP15439    | <i>Kabuli</i>    | <i>Ca_Kabuli_Scaffold374</i>  | 198368                         | (T/C)       |
| 15440       | CakSNP15440    | <i>Kabuli</i>    | <i>Ca_Kabuli_Scaffold377</i>  | 393535                         | (G/T)       |
| 15441       | CakSNP15441    | <i>Kabuli</i>    | <i>Ca_Kabuli_Scaffold377</i>  | 393538                         | (G/A)       |
| 15442       | CakSNP15442    | <i>Kabuli</i>    | <i>Ca_Kabuli_Scaffold379</i>  | 69075                          | (A/C)       |

| <b>S.N.</b> | <b>SNP IDs</b> | <b>Cultivars</b> | <b>Chromosomes/scaffolds</b>  | <b>Physical positions (bp)</b> | <b>SNPs</b> |
|-------------|----------------|------------------|-------------------------------|--------------------------------|-------------|
| 15443       | CakSNP15443    | <i>Kabuli</i>    | <i>Ca_Kabuli_Scaffold379</i>  | 144442                         | (G/A)       |
| 15444       | CakSNP15444    | <i>Kabuli</i>    | <i>Ca_Kabuli_Scaffold379</i>  | 177306                         | (T/C)       |
| 15445       | CakSNP15445    | <i>Kabuli</i>    | <i>Ca_Kabuli_Scaffold379</i>  | 177354                         | (G/A)       |
| 15446       | CakSNP15446    | <i>Kabuli</i>    | <i>Ca_Kabuli_Scaffold379</i>  | 177340                         | (C/T)       |
| 15447       | CakSNP15447    | <i>Kabuli</i>    | <i>Ca_Kabuli_Scaffold379</i>  | 227608                         | (A/T)       |
| 15448       | CakSNP15448    | <i>Kabuli</i>    | <i>Ca_Kabuli_Scaffold379</i>  | 227604                         | (C/A)       |
| 15449       | CakSNP15449    | <i>Kabuli</i>    | <i>Ca_Kabuli_Scaffold379</i>  | 227597                         | (T/A)       |
| 15450       | CakSNP15450    | <i>Kabuli</i>    | <i>Ca_Kabuli_Scaffold38</i>   | 69499                          | (A/G)       |
| 15451       | CakSNP15451    | <i>Kabuli</i>    | <i>Ca_Kabuli_Scaffold38</i>   | 413691                         | (G/A)       |
| 15452       | CakSNP15452    | <i>Kabuli</i>    | <i>Ca_Kabuli_Scaffold38</i>   | 413713                         | (A/C)       |
| 15453       | CakSNP15453    | <i>Kabuli</i>    | <i>Ca_Kabuli_Scaffold38</i>   | 413719                         | (G/A)       |
| 15454       | CakSNP15454    | <i>Kabuli</i>    | <i>Ca_Kabuli_Scaffold38</i>   | 457392                         | (C/A)       |
| 15455       | CakSNP15455    | <i>Kabuli</i>    | <i>Ca_Kabuli_Scaffold38</i>   | 457596                         | (T/A)       |
| 15456       | CakSNP15456    | <i>Kabuli</i>    | <i>Ca_Kabuli_Scaffold38</i>   | 520372                         | (T/G)       |
| 15457       | CakSNP15457    | <i>Kabuli</i>    | <i>Ca_Kabuli_Scaffold38</i>   | 520311                         | (G/A)       |
| 15458       | CakSNP15458    | <i>Kabuli</i>    | <i>Ca_Kabuli_Scaffold38</i>   | 520377                         | (T/C)       |
| 15459       | CakSNP15459    | <i>Kabuli</i>    | <i>Ca_Kabuli_Scaffold38</i>   | 537059                         | (A/T)       |
| 15460       | CakSNP15460    | <i>Kabuli</i>    | <i>Ca_Kabuli_Scaffold38</i>   | 537063                         | (C/T)       |
| 15461       | CakSNP15461    | <i>Kabuli</i>    | <i>Ca_Kabuli_Scaffold3819</i> | 450                            | (T/A)       |
| 15462       | CakSNP15462    | <i>Kabuli</i>    | <i>Ca_Kabuli_Scaffold382</i>  | 36686                          | (A/T)       |
| 15463       | CakSNP15463    | <i>Kabuli</i>    | <i>Ca_Kabuli_Scaffold382</i>  | 36703                          | (A/T)       |
| 15464       | CakSNP15464    | <i>Kabuli</i>    | <i>Ca_Kabuli_Scaffold382</i>  | 36704                          | (G/T)       |
| 15465       | CakSNP15465    | <i>Kabuli</i>    | <i>Ca_Kabuli_Scaffold382</i>  | 36709                          | (G/A)       |
| 15466       | CakSNP15466    | <i>Kabuli</i>    | <i>Ca_Kabuli_Scaffold382</i>  | 36674                          | (G/A)       |
| 15467       | CakSNP15467    | <i>Kabuli</i>    | <i>Ca_Kabuli_Scaffold3824</i> | 26207                          | (G/A)       |
| 15468       | CakSNP15468    | <i>Kabuli</i>    | <i>Ca_Kabuli_Scaffold3824</i> | 26267                          | (G/A)       |
| 15469       | CakSNP15469    | <i>Kabuli</i>    | <i>Ca_Kabuli_Scaffold3824</i> | 26327                          | (G/A)       |
| 15470       | CakSNP15470    | <i>Kabuli</i>    | <i>Ca_Kabuli_Scaffold3824</i> | 26387                          | (G/A)       |
| 15471       | CakSNP15471    | <i>Kabuli</i>    | <i>Ca_Kabuli_Scaffold3865</i> | 12265                          | (T/A)       |
| 15472       | CakSNP15472    | <i>Kabuli</i>    | <i>Ca_Kabuli_Scaffold3865</i> | 65093                          | (T/C)       |
| 15473       | CakSNP15473    | <i>Kabuli</i>    | <i>Ca_Kabuli_Scaffold3865</i> | 65127                          | (C/A)       |
| 15474       | CakSNP15474    | <i>Kabuli</i>    | <i>Ca_Kabuli_Scaffold3865</i> | 65129                          | (T/A)       |
| 15475       | CakSNP15475    | <i>Kabuli</i>    | <i>Ca_Kabuli_Scaffold387</i>  | 3263                           | (G/A)       |
| 15476       | CakSNP15476    | <i>Kabuli</i>    | <i>Ca_Kabuli_Scaffold387</i>  | 3219                           | (C/A)       |
| 15477       | CakSNP15477    | <i>Kabuli</i>    | <i>Ca_Kabuli_Scaffold387</i>  | 3309                           | (T/C)       |
| 15478       | CakSNP15478    | <i>Kabuli</i>    | <i>Ca_Kabuli_Scaffold387</i>  | 3316                           | (G/A)       |
| 15479       | CakSNP15479    | <i>Kabuli</i>    | <i>Ca_Kabuli_Scaffold3945</i> | 3367                           | (G/A)       |
| 15480       | CakSNP15480    | <i>Kabuli</i>    | <i>Ca_Kabuli_Scaffold3945</i> | 3371                           | (G/A)       |
| 15481       | CakSNP15481    | <i>Kabuli</i>    | <i>Ca_Kabuli_Scaffold3945</i> | 3880                           | (G/T)       |

| <b>S.N.</b> | <b>SNP IDs</b> | <b>Cultivars</b> | <b>Chromosomes/scaffolds</b>  | <b>Physical positions (bp)</b> | <b>SNPs</b> |
|-------------|----------------|------------------|-------------------------------|--------------------------------|-------------|
| 15482       | CakSNP15482    | <i>Kabuli</i>    | <i>Ca_Kabuli_Scaffold3945</i> | 3879                           | (T/C)       |
| 15483       | CakSNP15483    | <i>Kabuli</i>    | <i>Ca_Kabuli_Scaffold3945</i> | 7260                           | (T/A)       |
| 15484       | CakSNP15484    | <i>Kabuli</i>    | <i>Ca_Kabuli_Scaffold3945</i> | 13468                          | (C/T)       |
| 15485       | CakSNP15485    | <i>Kabuli</i>    | <i>Ca_Kabuli_Scaffold3945</i> | 13440                          | (C/T)       |
| 15486       | CakSNP15486    | <i>Kabuli</i>    | <i>Ca_Kabuli_Scaffold3945</i> | 13892                          | (C/G)       |
| 15487       | CakSNP15487    | <i>Kabuli</i>    | <i>Ca_Kabuli_Scaffold3945</i> | 18891                          | (A/T)       |
| 15488       | CakSNP15488    | <i>Kabuli</i>    | <i>Ca_Kabuli_Scaffold3945</i> | 18892                          | (G/C)       |
| 15489       | CakSNP15489    | <i>Kabuli</i>    | <i>Ca_Kabuli_Scaffold3945</i> | 19359                          | (G/A)       |
| 15490       | CakSNP15490    | <i>Kabuli</i>    | <i>Ca_Kabuli_Scaffold3945</i> | 19366                          | (G/T)       |
| 15491       | CakSNP15491    | <i>Kabuli</i>    | <i>Ca_Kabuli_Scaffold3945</i> | 19367                          | (A/T)       |
| 15492       | CakSNP15492    | <i>Kabuli</i>    | <i>Ca_Kabuli_Scaffold3945</i> | 19368                          | (A/C)       |
| 15493       | CakSNP15493    | <i>Kabuli</i>    | <i>Ca_Kabuli_Scaffold396</i>  | 130566                         | (T/C)       |
| 15494       | CakSNP15494    | <i>Kabuli</i>    | <i>Ca_Kabuli_Scaffold396</i>  | 130671                         | (A/G)       |
| 15495       | CakSNP15495    | <i>Kabuli</i>    | <i>Ca_Kabuli_Scaffold396</i>  | 130639                         | (C/A)       |
| 15496       | CakSNP15496    | <i>Kabuli</i>    | <i>Ca_Kabuli_Scaffold396</i>  | 130636                         | (G/A)       |
| 15497       | CakSNP15497    | <i>Kabuli</i>    | <i>Ca_Kabuli_Scaffold396</i>  | 130635                         | (G/T)       |
| 15498       | CakSNP15498    | <i>Kabuli</i>    | <i>Ca_Kabuli_Scaffold396</i>  | 130624                         | (A/G)       |
| 15499       | CakSNP15499    | <i>Kabuli</i>    | <i>Ca_Kabuli_Scaffold396</i>  | 130621                         | (C/A)       |
| 15500       | CakSNP15500    | <i>Kabuli</i>    | <i>Ca_Kabuli_Scaffold396</i>  | 195890                         | (A/G)       |
| 15501       | CakSNP15501    | <i>Kabuli</i>    | <i>Ca_Kabuli_Scaffold396</i>  | 297325                         | (G/C)       |
| 15502       | CakSNP15502    | <i>Kabuli</i>    | <i>Ca_Kabuli_Scaffold398</i>  | 246956                         | (C/T)       |
| 15503       | CakSNP15503    | <i>Kabuli</i>    | <i>Ca_Kabuli_Scaffold398</i>  | 247004                         | (C/T)       |
| 15504       | CakSNP15504    | <i>Kabuli</i>    | <i>Ca_Kabuli_Scaffold398</i>  | 441570                         | (C/T)       |
| 15505       | CakSNP15505    | <i>Kabuli</i>    | <i>Ca_Kabuli_Scaffold398</i>  | 441605                         | (C/A)       |
| 15506       | CakSNP15506    | <i>Kabuli</i>    | <i>Ca_Kabuli_Scaffold40</i>   | 386189                         | (A/C)       |
| 15507       | CakSNP15507    | <i>Kabuli</i>    | <i>Ca_Kabuli_Scaffold40</i>   | 497729                         | (T/C)       |
| 15508       | CakSNP15508    | <i>Kabuli</i>    | <i>Ca_Kabuli_Scaffold40</i>   | 542951                         | (C/G)       |
| 15509       | CakSNP15509    | <i>Kabuli</i>    | <i>Ca_Kabuli_Scaffold40</i>   | 548453                         | (A/G)       |
| 15510       | CakSNP15510    | <i>Kabuli</i>    | <i>Ca_Kabuli_Scaffold40</i>   | 636910                         | (C/T)       |
| 15511       | CakSNP15511    | <i>Kabuli</i>    | <i>Ca_Kabuli_Scaffold40</i>   | 691226                         | (C/G)       |
| 15512       | CakSNP15512    | <i>Kabuli</i>    | <i>Ca_Kabuli_Scaffold40</i>   | 871303                         | (A/C)       |
| 15513       | CakSNP15513    | <i>Kabuli</i>    | <i>Ca_Kabuli_Scaffold40</i>   | 911602                         | (T/G)       |
| 15514       | CakSNP15514    | <i>Kabuli</i>    | <i>Ca_Kabuli_Scaffold40</i>   | 968798                         | (G/A)       |
| 15515       | CakSNP15515    | <i>Kabuli</i>    | <i>Ca_Kabuli_Scaffold40</i>   | 996604                         | (T/C)       |
| 15516       | CakSNP15516    | <i>Kabuli</i>    | <i>Ca_Kabuli_Scaffold40</i>   | 1014875                        | (G/A)       |
| 15517       | CakSNP15517    | <i>Kabuli</i>    | <i>Ca_Kabuli_Scaffold40</i>   | 1014834                        | (T/A)       |
| 15518       | CakSNP15518    | <i>Kabuli</i>    | <i>Ca_Kabuli_Scaffold40</i>   | 1014826                        | (C/T)       |
| 15519       | CakSNP15519    | <i>Kabuli</i>    | <i>Ca_Kabuli_Scaffold40</i>   | 1014805                        | (C/T)       |
| 15520       | CakSNP15520    | <i>Kabuli</i>    | <i>Ca_Kabuli_Scaffold40</i>   | 1039218                        | (T/C)       |

| <b>S.N.</b> | <b>SNP IDs</b> | <b>Cultivars</b> | <b>Chromosomes/scaffolds</b>  | <b>Physical positions (bp)</b> | <b>SNPs</b> |
|-------------|----------------|------------------|-------------------------------|--------------------------------|-------------|
| 15521       | CakSNP15521    | <i>Kabuli</i>    | <i>Ca_Kabuli_Scaffold40</i>   | 1039233                        | (A/T)       |
| 15522       | CakSNP15522    | <i>Kabuli</i>    | <i>Ca_Kabuli_Scaffold40</i>   | 1049594                        | (G/A)       |
| 15523       | CakSNP15523    | <i>Kabuli</i>    | <i>Ca_Kabuli_Scaffold40</i>   | 1050111                        | (C/T)       |
| 15524       | CakSNP15524    | <i>Kabuli</i>    | <i>Ca_Kabuli_Scaffold40</i>   | 1050164                        | (C/T)       |
| 15525       | CakSNP15525    | <i>Kabuli</i>    | <i>Ca_Kabuli_Scaffold40</i>   | 1050255                        | (T/C)       |
| 15526       | CakSNP15526    | <i>Kabuli</i>    | <i>Ca_Kabuli_Scaffold40</i>   | 1050175                        | (G/C)       |
| 15527       | CakSNP15527    | <i>Kabuli</i>    | <i>Ca_Kabuli_Scaffold40</i>   | 1052597                        | (T/C)       |
| 15528       | CakSNP15528    | <i>Kabuli</i>    | <i>Ca_Kabuli_Scaffold40</i>   | 1052983                        | (G/A)       |
| 15529       | CakSNP15529    | <i>Kabuli</i>    | <i>Ca_Kabuli_Scaffold40</i>   | 1053215                        | (G/A)       |
| 15530       | CakSNP15530    | <i>Kabuli</i>    | <i>Ca_Kabuli_Scaffold401</i>  | 49065                          | (G/A)       |
| 15531       | CakSNP15531    | <i>Kabuli</i>    | <i>Ca_Kabuli_Scaffold4011</i> | 93334                          | (T/C)       |
| 15532       | CakSNP15532    | <i>Kabuli</i>    | <i>Ca_Kabuli_Scaffold4011</i> | 93347                          | (C/T)       |
| 15533       | CakSNP15533    | <i>Kabuli</i>    | <i>Ca_Kabuli_Scaffold4011</i> | 96223                          | (G/C)       |
| 15534       | CakSNP15534    | <i>Kabuli</i>    | <i>Ca_Kabuli_Scaffold4011</i> | 97602                          | (T/C)       |
| 15535       | CakSNP15535    | <i>Kabuli</i>    | <i>Ca_Kabuli_Scaffold4011</i> | 130271                         | (G/A)       |
| 15536       | CakSNP15536    | <i>Kabuli</i>    | <i>Ca_Kabuli_Scaffold4011</i> | 130213                         | (G/A)       |
| 15537       | CakSNP15537    | <i>Kabuli</i>    | <i>Ca_Kabuli_Scaffold404</i>  | 273203                         | (C/A)       |
| 15538       | CakSNP15538    | <i>Kabuli</i>    | <i>Ca_Kabuli_Scaffold404</i>  | 273209                         | (C/A)       |
| 15539       | CakSNP15539    | <i>Kabuli</i>    | <i>Ca_Kabuli_Scaffold404</i>  | 273220                         | (G/A)       |
| 15540       | CakSNP15540    | <i>Kabuli</i>    | <i>Ca_Kabuli_Scaffold404</i>  | 273245                         | (C/T)       |
| 15541       | CakSNP15541    | <i>Kabuli</i>    | <i>Ca_Kabuli_Scaffold404</i>  | 285941                         | (G/A)       |
| 15542       | CakSNP15542    | <i>Kabuli</i>    | <i>Ca_Kabuli_Scaffold404</i>  | 285952                         | (T/C)       |
| 15543       | CakSNP15543    | <i>Kabuli</i>    | <i>Ca_Kabuli_Scaffold404</i>  | 285958                         | (C/G)       |
| 15544       | CakSNP15544    | <i>Kabuli</i>    | <i>Ca_Kabuli_Scaffold404</i>  | 285987                         | (G/A)       |
| 15545       | CakSNP15545    | <i>Kabuli</i>    | <i>Ca_Kabuli_Scaffold404</i>  | 285999                         | (T/G)       |
| 15546       | CakSNP15546    | <i>Kabuli</i>    | <i>Ca_Kabuli_Scaffold404</i>  | 286013                         | (T/A)       |
| 15547       | CakSNP15547    | <i>Kabuli</i>    | <i>Ca_Kabuli_Scaffold404</i>  | 355859                         | (G/A)       |
| 15548       | CakSNP15548    | <i>Kabuli</i>    | <i>Ca_Kabuli_Scaffold4057</i> | 16503                          | (C/G)       |
| 15549       | CakSNP15549    | <i>Kabuli</i>    | <i>Ca_Kabuli_Scaffold41</i>   | 14657                          | (C/A)       |
| 15550       | CakSNP15550    | <i>Kabuli</i>    | <i>Ca_Kabuli_Scaffold41</i>   | 122583                         | (G/C)       |
| 15551       | CakSNP15551    | <i>Kabuli</i>    | <i>Ca_Kabuli_Scaffold4102</i> | 1035                           | (C/G)       |
| 15552       | CakSNP15552    | <i>Kabuli</i>    | <i>Ca_Kabuli_Scaffold4102</i> | 1136                           | (A/G)       |
| 15553       | CakSNP15553    | <i>Kabuli</i>    | <i>Ca_Kabuli_Scaffold4102</i> | 1160                           | (T/C)       |
| 15554       | CakSNP15554    | <i>Kabuli</i>    | <i>Ca_Kabuli_Scaffold4102</i> | 1163                           | (G/T)       |
| 15555       | CakSNP15555    | <i>Kabuli</i>    | <i>Ca_Kabuli_Scaffold4102</i> | 1346                           | (C/T)       |
| 15556       | CakSNP15556    | <i>Kabuli</i>    | <i>Ca_Kabuli_Scaffold411</i>  | 60078                          | (C/T)       |
| 15557       | CakSNP15557    | <i>Kabuli</i>    | <i>Ca_Kabuli_Scaffold411</i>  | 323122                         | (T/C)       |
| 15558       | CakSNP15558    | <i>Kabuli</i>    | <i>Ca_Kabuli_Scaffold411</i>  | 323140                         | (T/C)       |
| 15559       | CakSNP15559    | <i>Kabuli</i>    | <i>Ca_Kabuli_Scaffold411</i>  | 323141                         | (G/A)       |



| <b>S.N.</b> | <b>SNP IDs</b> | <b>Cultivars</b> | <b>Chromosomes/scaffolds</b> | <b>Physical positions (bp)</b> | <b>SNPs</b> |
|-------------|----------------|------------------|------------------------------|--------------------------------|-------------|
| 15560       | CakSNP15560    | <i>Kabuli</i>    | <i>Ca_Kabuli_Scaffold411</i> | 323147                         | (T/C)       |
| 15561       | CakSNP15561    | <i>Kabuli</i>    | <i>Ca_Kabuli_Scaffold411</i> | 323161                         | (G/A)       |
| 15562       | CakSNP15562    | <i>Kabuli</i>    | <i>Ca_Kabuli_Scaffold411</i> | 323162                         | (T/C)       |
| 15563       | CakSNP15563    | <i>Kabuli</i>    | <i>Ca_Kabuli_Scaffold411</i> | 323167                         | (C/G)       |
| 15564       | CakSNP15564    | <i>Kabuli</i>    | <i>Ca_Kabuli_Scaffold411</i> | 323179                         | (T/G)       |
| 15565       | CakSNP15565    | <i>Kabuli</i>    | <i>Ca_Kabuli_Scaffold411</i> | 323114                         | (C/G)       |
| 15566       | CakSNP15566    | <i>Kabuli</i>    | <i>Ca_Kabuli_Scaffold411</i> | 323215                         | (T/C)       |
| 15567       | CakSNP15567    | <i>Kabuli</i>    | <i>Ca_Kabuli_Scaffold415</i> | 8479                           | (A/C)       |
| 15568       | CakSNP15568    | <i>Kabuli</i>    | <i>Ca_Kabuli_Scaffold415</i> | 8529                           | (G/A)       |
| 15569       | CakSNP15569    | <i>Kabuli</i>    | <i>Ca_Kabuli_Scaffold418</i> | 6092                           | (C/G)       |
| 15570       | CakSNP15570    | <i>Kabuli</i>    | <i>Ca_Kabuli_Scaffold418</i> | 6094                           | (T/G)       |
| 15571       | CakSNP15571    | <i>Kabuli</i>    | <i>Ca_Kabuli_Scaffold418</i> | 13769                          | (T/G)       |
| 15572       | CakSNP15572    | <i>Kabuli</i>    | <i>Ca_Kabuli_Scaffold418</i> | 13804                          | (T/G)       |
| 15573       | CakSNP15573    | <i>Kabuli</i>    | <i>Ca_Kabuli_Scaffold418</i> | 13808                          | (A/G)       |
| 15574       | CakSNP15574    | <i>Kabuli</i>    | <i>Ca_Kabuli_Scaffold418</i> | 13811                          | (G/A)       |
| 15575       | CakSNP15575    | <i>Kabuli</i>    | <i>Ca_Kabuli_Scaffold418</i> | 13812                          | (C/A)       |
| 15576       | CakSNP15576    | <i>Kabuli</i>    | <i>Ca_Kabuli_Scaffold418</i> | 151140                         | (G/T)       |
| 15577       | CakSNP15577    | <i>Kabuli</i>    | <i>Ca_Kabuli_Scaffold418</i> | 151205                         | (C/T)       |
| 15578       | CakSNP15578    | <i>Kabuli</i>    | <i>Ca_Kabuli_Scaffold418</i> | 151256                         | (G/A)       |
| 15579       | CakSNP15579    | <i>Kabuli</i>    | <i>Ca_Kabuli_Scaffold419</i> | 73537                          | (T/G)       |
| 15580       | CakSNP15580    | <i>Kabuli</i>    | <i>Ca_Kabuli_Scaffold420</i> | 34145                          | (T/G)       |
| 15581       | CakSNP15581    | <i>Kabuli</i>    | <i>Ca_Kabuli_Scaffold420</i> | 42532                          | (G/A)       |
| 15582       | CakSNP15582    | <i>Kabuli</i>    | <i>Ca_Kabuli_Scaffold420</i> | 42739                          | (C/T)       |
| 15583       | CakSNP15583    | <i>Kabuli</i>    | <i>Ca_Kabuli_Scaffold420</i> | 42811                          | (C/T)       |
| 15584       | CakSNP15584    | <i>Kabuli</i>    | <i>Ca_Kabuli_Scaffold420</i> | 42877                          | (T/C)       |
| 15585       | CakSNP15585    | <i>Kabuli</i>    | <i>Ca_Kabuli_Scaffold420</i> | 43372                          | (C/T)       |
| 15586       | CakSNP15586    | <i>Kabuli</i>    | <i>Ca_Kabuli_Scaffold420</i> | 92756                          | (C/T)       |
| 15587       | CakSNP15587    | <i>Kabuli</i>    | <i>Ca_Kabuli_Scaffold420</i> | 92759                          | (A/G)       |
| 15588       | CakSNP15588    | <i>Kabuli</i>    | <i>Ca_Kabuli_Scaffold420</i> | 92784                          | (C/T)       |
| 15589       | CakSNP15589    | <i>Kabuli</i>    | <i>Ca_Kabuli_Scaffold420</i> | 92813                          | (G/T)       |
| 15590       | CakSNP15590    | <i>Kabuli</i>    | <i>Ca_Kabuli_Scaffold420</i> | 92865                          | (G/T)       |
| 15591       | CakSNP15591    | <i>Kabuli</i>    | <i>Ca_Kabuli_Scaffold420</i> | 92846                          | (C/T)       |
| 15592       | CakSNP15592    | <i>Kabuli</i>    | <i>Ca_Kabuli_Scaffold420</i> | 92801                          | (A/C)       |
| 15593       | CakSNP15593    | <i>Kabuli</i>    | <i>Ca_Kabuli_Scaffold420</i> | 149744                         | (C/G)       |
| 15594       | CakSNP15594    | <i>Kabuli</i>    | <i>Ca_Kabuli_Scaffold420</i> | 242536                         | (G/T)       |
| 15595       | CakSNP15595    | <i>Kabuli</i>    | <i>Ca_Kabuli_Scaffold420</i> | 242503                         | (C/T)       |
| 15596       | CakSNP15596    | <i>Kabuli</i>    | <i>Ca_Kabuli_Scaffold420</i> | 242487                         | (A/G)       |
| 15597       | CakSNP15597    | <i>Kabuli</i>    | <i>Ca_Kabuli_Scaffold420</i> | 242922                         | (A/C)       |
| 15598       | CakSNP15598    | <i>Kabuli</i>    | <i>Ca_Kabuli_Scaffold420</i> | 254661                         | (T/G)       |

| <b>S.N.</b> | <b>SNP IDs</b> | <b>Cultivars</b> | <b>Chromosomes/scaffolds</b>   | <b>Physical positions (bp)</b> | <b>SNPs</b> |
|-------------|----------------|------------------|--------------------------------|--------------------------------|-------------|
| 15599       | CakSNP15599    | <i>Kabuli</i>    | <i>Ca_Kabuli_Scaffold420</i>   | 341146                         | (T/A)       |
| 15600       | CakSNP15600    | <i>Kabuli</i>    | <i>Ca_Kabuli_Scaffold420</i>   | 341184                         | (A/G)       |
| 15601       | CakSNP15601    | <i>Kabuli</i>    | <i>Ca_Kabuli_Scaffold420</i>   | 341202                         | (T/G)       |
| 15602       | CakSNP15602    | <i>Kabuli</i>    | <i>Ca_Kabuli_Scaffold420</i>   | 341206                         | (G/A)       |
| 15603       | CakSNP15603    | <i>Kabuli</i>    | <i>Ca_Kabuli_Scaffold421_1</i> | 25389                          | (G/A)       |
| 15604       | CakSNP15604    | <i>Kabuli</i>    | <i>Ca_Kabuli_Scaffold421_1</i> | 71804                          | (A/G)       |
| 15605       | CakSNP15605    | <i>Kabuli</i>    | <i>Ca_Kabuli_Scaffold421_1</i> | 71770                          | (G/T)       |
| 15606       | CakSNP15606    | <i>Kabuli</i>    | <i>Ca_Kabuli_Scaffold421_2</i> | 142859                         | (G/C)       |
| 15607       | CakSNP15607    | <i>Kabuli</i>    | <i>Ca_Kabuli_Scaffold421_2</i> | 341095                         | (C/A)       |
| 15608       | CakSNP15608    | <i>Kabuli</i>    | <i>Ca_Kabuli_Scaffold421_2</i> | 341136                         | (C/A)       |
| 15609       | CakSNP15609    | <i>Kabuli</i>    | <i>Ca_Kabuli_Scaffold421_2</i> | 446961                         | (G/A)       |
| 15610       | CakSNP15610    | <i>Kabuli</i>    | <i>Ca_Kabuli_Scaffold421_2</i> | 446976                         | (C/A)       |
| 15611       | CakSNP15611    | <i>Kabuli</i>    | <i>Ca_Kabuli_Scaffold421_2</i> | 446979                         | (C/T)       |
| 15612       | CakSNP15612    | <i>Kabuli</i>    | <i>Ca_Kabuli_Scaffold424</i>   | 32402                          | (C/G)       |
| 15613       | CakSNP15613    | <i>Kabuli</i>    | <i>Ca_Kabuli_Scaffold4331</i>  | 4044                           | (T/G)       |
| 15614       | CakSNP15614    | <i>Kabuli</i>    | <i>Ca_Kabuli_Scaffold44</i>    | 66309                          | (A/C)       |
| 15615       | CakSNP15615    | <i>Kabuli</i>    | <i>Ca_Kabuli_Scaffold44</i>    | 66280                          | (G/A)       |
| 15616       | CakSNP15616    | <i>Kabuli</i>    | <i>Ca_Kabuli_Scaffold44</i>    | 87412                          | (G/A)       |
| 15617       | CakSNP15617    | <i>Kabuli</i>    | <i>Ca_Kabuli_Scaffold4414</i>  | 276                            | (C/T)       |
| 15618       | CakSNP15618    | <i>Kabuli</i>    | <i>Ca_Kabuli_Scaffold4452</i>  | 20003                          | (G/A)       |
| 15619       | CakSNP15619    | <i>Kabuli</i>    | <i>Ca_Kabuli_Scaffold4452</i>  | 20005                          | (G/A)       |
| 15620       | CakSNP15620    | <i>Kabuli</i>    | <i>Ca_Kabuli_Scaffold4452</i>  | 20038                          | (A/G)       |
| 15621       | CakSNP15621    | <i>Kabuli</i>    | <i>Ca_Kabuli_Scaffold4452</i>  | 20010                          | (G/A)       |
| 15622       | CakSNP15622    | <i>Kabuli</i>    | <i>Ca_Kabuli_Scaffold4452</i>  | 29414                          | (G/T)       |
| 15623       | CakSNP15623    | <i>Kabuli</i>    | <i>Ca_Kabuli_Scaffold4452</i>  | 36715                          | (A/T)       |
| 15624       | CakSNP15624    | <i>Kabuli</i>    | <i>Ca_Kabuli_Scaffold4452</i>  | 69950                          | (A/C)       |
| 15625       | CakSNP15625    | <i>Kabuli</i>    | <i>Ca_Kabuli_Scaffold4452</i>  | 70041                          | (T/C)       |
| 15626       | CakSNP15626    | <i>Kabuli</i>    | <i>Ca_Kabuli_Scaffold450</i>   | 132367                         | (C/T)       |
| 15627       | CakSNP15627    | <i>Kabuli</i>    | <i>Ca_Kabuli_Scaffold450</i>   | 132427                         | (A/T)       |
| 15628       | CakSNP15628    | <i>Kabuli</i>    | <i>Ca_Kabuli_Scaffold450</i>   | 197287                         | (G/A)       |
| 15629       | CakSNP15629    | <i>Kabuli</i>    | <i>Ca_Kabuli_Scaffold450</i>   | 197272                         | (G/A)       |
| 15630       | CakSNP15630    | <i>Kabuli</i>    | <i>Ca_Kabuli_Scaffold450</i>   | 197262                         | (T/G)       |
| 15631       | CakSNP15631    | <i>Kabuli</i>    | <i>Ca_Kabuli_Scaffold450</i>   | 197230                         | (C/A)       |
| 15632       | CakSNP15632    | <i>Kabuli</i>    | <i>Ca_Kabuli_Scaffold450</i>   | 197226                         | (G/A)       |
| 15633       | CakSNP15633    | <i>Kabuli</i>    | <i>Ca_Kabuli_Scaffold450</i>   | 250303                         | (G/T)       |
| 15634       | CakSNP15634    | <i>Kabuli</i>    | <i>Ca_Kabuli_Scaffold451</i>   | 103555                         | (G/C)       |
| 15635       | CakSNP15635    | <i>Kabuli</i>    | <i>Ca_Kabuli_Scaffold451</i>   | 103596                         | (A/G)       |
| 15636       | CakSNP15636    | <i>Kabuli</i>    | <i>Ca_Kabuli_Scaffold451</i>   | 117231                         | (A/G)       |
| 15637       | CakSNP15637    | <i>Kabuli</i>    | <i>Ca_Kabuli_Scaffold451</i>   | 117300                         | (C/A)       |

| <b>S.N.</b> | <b>SNP IDs</b> | <b>Cultivars</b> | <b>Chromosomes/scaffolds</b>  | <b>Physical positions (bp)</b> | <b>SNPs</b> |
|-------------|----------------|------------------|-------------------------------|--------------------------------|-------------|
| 15638       | CakSNP15638    | <i>Kabuli</i>    | <i>Ca_Kabuli_Scaffold4511</i> | 40072                          | (C/A)       |
| 15639       | CakSNP15639    | <i>Kabuli</i>    | <i>Ca_Kabuli_Scaffold4511</i> | 40014                          | (C/T)       |
| 15640       | CakSNP15640    | <i>Kabuli</i>    | <i>Ca_Kabuli_Scaffold4511</i> | 40089                          | (C/T)       |
| 15641       | CakSNP15641    | <i>Kabuli</i>    | <i>Ca_Kabuli_Scaffold452</i>  | 1892                           | (G/A)       |
| 15642       | CakSNP15642    | <i>Kabuli</i>    | <i>Ca_Kabuli_Scaffold452</i>  | 1881                           | (A/G)       |
| 15643       | CakSNP15643    | <i>Kabuli</i>    | <i>Ca_Kabuli_Scaffold452</i>  | 1841                           | (A/G)       |
| 15644       | CakSNP15644    | <i>Kabuli</i>    | <i>Ca_Kabuli_Scaffold452</i>  | 1837                           | (A/C)       |
| 15645       | CakSNP15645    | <i>Kabuli</i>    | <i>Ca_Kabuli_Scaffold452</i>  | 1836                           | (A/G)       |
| 15646       | CakSNP15646    | <i>Kabuli</i>    | <i>Ca_Kabuli_Scaffold452</i>  | 1835                           | (C/T)       |
| 15647       | CakSNP15647    | <i>Kabuli</i>    | <i>Ca_Kabuli_Scaffold453</i>  | 303193                         | (T/C)       |
| 15648       | CakSNP15648    | <i>Kabuli</i>    | <i>Ca_Kabuli_Scaffold453</i>  | 303201                         | (G/C)       |
| 15649       | CakSNP15649    | <i>Kabuli</i>    | <i>Ca_Kabuli_Scaffold453</i>  | 303246                         | (A/G)       |
| 15650       | CakSNP15650    | <i>Kabuli</i>    | <i>Ca_Kabuli_Scaffold453</i>  | 303248                         | (C/T)       |
| 15651       | CakSNP15651    | <i>Kabuli</i>    | <i>Ca_Kabuli_Scaffold453</i>  | 303259                         | (C/G)       |
| 15652       | CakSNP15652    | <i>Kabuli</i>    | <i>Ca_Kabuli_Scaffold46</i>   | 39438                          | (C/A)       |
| 15653       | CakSNP15653    | <i>Kabuli</i>    | <i>Ca_Kabuli_Scaffold46</i>   | 39470                          | (C/T)       |
| 15654       | CakSNP15654    | <i>Kabuli</i>    | <i>Ca_Kabuli_Scaffold461</i>  | 20652                          | (C/A)       |
| 15655       | CakSNP15655    | <i>Kabuli</i>    | <i>Ca_Kabuli_Scaffold461</i>  | 20629                          | (A/T)       |
| 15656       | CakSNP15656    | <i>Kabuli</i>    | <i>Ca_Kabuli_Scaffold461</i>  | 20603                          | (C/T)       |
| 15657       | CakSNP15657    | <i>Kabuli</i>    | <i>Ca_Kabuli_Scaffold461</i>  | 20599                          | (C/A)       |
| 15658       | CakSNP15658    | <i>Kabuli</i>    | <i>Ca_Kabuli_Scaffold4620</i> | 2699                           | (T/C)       |
| 15659       | CakSNP15659    | <i>Kabuli</i>    | <i>Ca_Kabuli_Scaffold4620</i> | 23442                          | (T/C)       |
| 15660       | CakSNP15660    | <i>Kabuli</i>    | <i>Ca_Kabuli_Scaffold4641</i> | 511                            | (G/A)       |
| 15661       | CakSNP15661    | <i>Kabuli</i>    | <i>Ca_Kabuli_Scaffold4641</i> | 547                            | (A/C)       |
| 15662       | CakSNP15662    | <i>Kabuli</i>    | <i>Ca_Kabuli_Scaffold4641</i> | 553                            | (C/A)       |
| 15663       | CakSNP15663    | <i>Kabuli</i>    | <i>Ca_Kabuli_Scaffold4641</i> | 556                            | (G/C)       |
| 15664       | CakSNP15664    | <i>Kabuli</i>    | <i>Ca_Kabuli_Scaffold4662</i> | 7683                           | (T/C)       |
| 15665       | CakSNP15665    | <i>Kabuli</i>    | <i>Ca_Kabuli_Scaffold4662</i> | 7651                           | (T/C)       |
| 15666       | CakSNP15666    | <i>Kabuli</i>    | <i>Ca_Kabuli_Scaffold4662</i> | 7638                           | (C/T)       |
| 15667       | CakSNP15667    | <i>Kabuli</i>    | <i>Ca_Kabuli_Scaffold4662</i> | 7632                           | (A/G)       |
| 15668       | CakSNP15668    | <i>Kabuli</i>    | <i>Ca_Kabuli_Scaffold4695</i> | 5685                           | (A/G)       |
| 15669       | CakSNP15669    | <i>Kabuli</i>    | <i>Ca_Kabuli_Scaffold470</i>  | 7175                           | (A/G)       |
| 15670       | CakSNP15670    | <i>Kabuli</i>    | <i>Ca_Kabuli_Scaffold473</i>  | 24996                          | (G/A)       |
| 15671       | CakSNP15671    | <i>Kabuli</i>    | <i>Ca_Kabuli_Scaffold473</i>  | 24984                          | (T/C)       |
| 15672       | CakSNP15672    | <i>Kabuli</i>    | <i>Ca_Kabuli_Scaffold473</i>  | 24973                          | (T/C)       |
| 15673       | CakSNP15673    | <i>Kabuli</i>    | <i>Ca_Kabuli_Scaffold475</i>  | 135286                         | (C/A)       |
| 15674       | CakSNP15674    | <i>Kabuli</i>    | <i>Ca_Kabuli_Scaffold475</i>  | 135290                         | (G/A)       |
| 15675       | CakSNP15675    | <i>Kabuli</i>    | <i>Ca_Kabuli_Scaffold477</i>  | 51898                          | (C/T)       |
| 15676       | CakSNP15676    | <i>Kabuli</i>    | <i>Ca_Kabuli_Scaffold4777</i> | 10546                          | (G/T)       |

| <b>S.N.</b> | <b>SNP IDs</b> | <b>Cultivars</b> | <b>Chromosomes/scaffolds</b> | <b>Physical positions (bp)</b> | <b>SNPs</b> |
|-------------|----------------|------------------|------------------------------|--------------------------------|-------------|
| 15677       | CakSNP15677    | Kabuli           | Ca_Kabuli_Scaffold4777       | 16224                          | (A/T)       |
| 15678       | CakSNP15678    | Kabuli           | Ca_Kabuli_Scaffold4777       | 16239                          | (G/T)       |
| 15679       | CakSNP15679    | Kabuli           | Ca_Kabuli_Scaffold4777       | 55347                          | (G/T)       |
| 15680       | CakSNP15680    | Kabuli           | Ca_Kabuli_Scaffold4777       | 72624                          | (G/A)       |
| 15681       | CakSNP15681    | Kabuli           | Ca_Kabuli_Scaffold4777       | 76950                          | (C/A)       |
| 15682       | CakSNP15682    | Kabuli           | Ca_Kabuli_Scaffold4777       | 106820                         | (A/G)       |
| 15683       | CakSNP15683    | Kabuli           | Ca_Kabuli_Scaffold4777       | 112193                         | (A/C)       |
| 15684       | CakSNP15684    | Kabuli           | Ca_Kabuli_Scaffold48         | 261719                         | (A/G)       |
| 15685       | CakSNP15685    | Kabuli           | Ca_Kabuli_Scaffold48         | 420925                         | (A/G)       |
| 15686       | CakSNP15686    | Kabuli           | Ca_Kabuli_Scaffold480        | 67375                          | (T/C)       |
| 15687       | CakSNP15687    | Kabuli           | Ca_Kabuli_Scaffold4836       | 5866                           | (T/A)       |
| 15688       | CakSNP15688    | Kabuli           | Ca_Kabuli_Scaffold4836       | 5891                           | (A/T)       |
| 15689       | CakSNP15689    | Kabuli           | Ca_Kabuli_Scaffold4836       | 5909                           | (G/A)       |
| 15690       | CakSNP15690    | Kabuli           | Ca_Kabuli_Scaffold4836       | 5846                           | (C/T)       |
| 15691       | CakSNP15691    | Kabuli           | Ca_Kabuli_Scaffold484        | 203947                         | (C/T)       |
| 15692       | CakSNP15692    | Kabuli           | Ca_Kabuli_Scaffold484        | 209786                         | (A/C)       |
| 15693       | CakSNP15693    | Kabuli           | Ca_Kabuli_Scaffold484        | 243567                         | (C/T)       |
| 15694       | CakSNP15694    | Kabuli           | Ca_Kabuli_Scaffold484        | 243575                         | (T/A)       |
| 15695       | CakSNP15695    | Kabuli           | Ca_Kabuli_Scaffold484        | 647868                         | (C/T)       |
| 15696       | CakSNP15696    | Kabuli           | Ca_Kabuli_Scaffold484        | 647866                         | (A/G)       |
| 15697       | CakSNP15697    | Kabuli           | Ca_Kabuli_Scaffold484        | 647809                         | (A/T)       |
| 15698       | CakSNP15698    | Kabuli           | Ca_Kabuli_Scaffold484        | 660749                         | (C/G)       |
| 15699       | CakSNP15699    | Kabuli           | Ca_Kabuli_Scaffold485        | 103572                         | (C/T)       |
| 15700       | CakSNP15700    | Kabuli           | Ca_Kabuli_Scaffold485        | 103546                         | (A/G)       |
| 15701       | CakSNP15701    | Kabuli           | Ca_Kabuli_Scaffold485        | 103528                         | (A/C)       |
| 15702       | CakSNP15702    | Kabuli           | Ca_Kabuli_Scaffold485        | 123578                         | (T/C)       |
| 15703       | CakSNP15703    | Kabuli           | Ca_Kabuli_Scaffold485        | 123642                         | (G/A)       |
| 15704       | CakSNP15704    | Kabuli           | Ca_Kabuli_Scaffold495        | 128200                         | (A/T)       |
| 15705       | CakSNP15705    | Kabuli           | Ca_Kabuli_Scaffold496        | 53652                          | (G/A)       |
| 15706       | CakSNP15706    | Kabuli           | Ca_Kabuli_Scaffold496        | 53657                          | (A/T)       |
| 15707       | CakSNP15707    | Kabuli           | Ca_Kabuli_Scaffold496        | 53616                          | (G/T)       |
| 15708       | CakSNP15708    | Kabuli           | Ca_Kabuli_Scaffold496        | 53587                          | (A/G)       |
| 15709       | CakSNP15709    | Kabuli           | Ca_Kabuli_Scaffold496        | 175429                         | (G/A)       |
| 15710       | CakSNP15710    | Kabuli           | Ca_Kabuli_Scaffold496        | 175493                         | (G/A)       |
| 15711       | CakSNP15711    | Kabuli           | Ca_Kabuli_Scaffold498        | 146772                         | (A/C)       |
| 15712       | CakSNP15712    | Kabuli           | Ca_Kabuli_Scaffold498        | 148658                         | (G/T)       |
| 15713       | CakSNP15713    | Kabuli           | Ca_Kabuli_Scaffold498        | 164638                         | (T/C)       |
| 15714       | CakSNP15714    | Kabuli           | Ca_Kabuli_Scaffold498        | 164615                         | (G/C)       |
| 15715       | CakSNP15715    | Kabuli           | Ca_Kabuli_Scaffold498        | 164590                         | (T/A)       |

| <b>S.N.</b> | <b>SNP IDs</b> | <b>Cultivars</b> | <b>Chromosomes/scaffolds</b>  | <b>Physical positions (bp)</b> | <b>SNPs</b> |
|-------------|----------------|------------------|-------------------------------|--------------------------------|-------------|
| 15716       | CakSNP15716    | <i>Kabuli</i>    | <i>Ca_Kabuli_Scaffold50</i>   | 153593                         | (T/A)       |
| 15717       | CakSNP15717    | <i>Kabuli</i>    | <i>Ca_Kabuli_Scaffold50</i>   | 153599                         | (C/G)       |
| 15718       | CakSNP15718    | <i>Kabuli</i>    | <i>Ca_Kabuli_Scaffold50</i>   | 153631                         | (C/T)       |
| 15719       | CakSNP15719    | <i>Kabuli</i>    | <i>Ca_Kabuli_Scaffold50</i>   | 153734                         | (A/C)       |
| 15720       | CakSNP15720    | <i>Kabuli</i>    | <i>Ca_Kabuli_Scaffold50</i>   | 153851                         | (T/C)       |
| 15721       | CakSNP15721    | <i>Kabuli</i>    | <i>Ca_Kabuli_Scaffold50</i>   | 191625                         | (T/C)       |
| 15722       | CakSNP15722    | <i>Kabuli</i>    | <i>Ca_Kabuli_Scaffold50</i>   | 201219                         | (C/G)       |
| 15723       | CakSNP15723    | <i>Kabuli</i>    | <i>Ca_Kabuli_Scaffold50</i>   | 448866                         | (G/A)       |
| 15724       | CakSNP15724    | <i>Kabuli</i>    | <i>Ca_Kabuli_Scaffold510</i>  | 12378                          | (T/A)       |
| 15725       | CakSNP15725    | <i>Kabuli</i>    | <i>Ca_Kabuli_Scaffold510</i>  | 12383                          | (G/T)       |
| 15726       | CakSNP15726    | <i>Kabuli</i>    | <i>Ca_Kabuli_Scaffold510</i>  | 12394                          | (C/A)       |
| 15727       | CakSNP15727    | <i>Kabuli</i>    | <i>Ca_Kabuli_Scaffold510</i>  | 12414                          | (C/T)       |
| 15728       | CakSNP15728    | <i>Kabuli</i>    | <i>Ca_Kabuli_Scaffold510</i>  | 12434                          | (C/T)       |
| 15729       | CakSNP15729    | <i>Kabuli</i>    | <i>Ca_Kabuli_Scaffold511</i>  | 10450                          | (T/G)       |
| 15730       | CakSNP15730    | <i>Kabuli</i>    | <i>Ca_Kabuli_Scaffold511</i>  | 10520                          | (G/T)       |
| 15731       | CakSNP15731    | <i>Kabuli</i>    | <i>Ca_Kabuli_Scaffold511</i>  | 173376                         | (C/A)       |
| 15732       | CakSNP15732    | <i>Kabuli</i>    | <i>Ca_Kabuli_Scaffold511</i>  | 173377                         | (A/G)       |
| 15733       | CakSNP15733    | <i>Kabuli</i>    | <i>Ca_Kabuli_Scaffold511</i>  | 173378                         | (G/A)       |
| 15734       | CakSNP15734    | <i>Kabuli</i>    | <i>Ca_Kabuli_Scaffold513</i>  | 7188                           | (A/C)       |
| 15735       | CakSNP15735    | <i>Kabuli</i>    | <i>Ca_Kabuli_Scaffold5163</i> | 2301                           | (A/G)       |
| 15736       | CakSNP15736    | <i>Kabuli</i>    | <i>Ca_Kabuli_Scaffold5185</i> | 1091                           | (G/A)       |
| 15737       | CakSNP15737    | <i>Kabuli</i>    | <i>Ca_Kabuli_Scaffold520</i>  | 143359                         | (C/T)       |
| 15738       | CakSNP15738    | <i>Kabuli</i>    | <i>Ca_Kabuli_Scaffold520</i>  | 143358                         | (G/A)       |
| 15739       | CakSNP15739    | <i>Kabuli</i>    | <i>Ca_Kabuli_Scaffold520</i>  | 143356                         | (C/G)       |
| 15740       | CakSNP15740    | <i>Kabuli</i>    | <i>Ca_Kabuli_Scaffold520</i>  | 143342                         | (G/A)       |
| 15741       | CakSNP15741    | <i>Kabuli</i>    | <i>Ca_Kabuli_Scaffold520</i>  | 143336                         | (T/C)       |
| 15742       | CakSNP15742    | <i>Kabuli</i>    | <i>Ca_Kabuli_Scaffold520</i>  | 143334                         | (G/A)       |
| 15743       | CakSNP15743    | <i>Kabuli</i>    | <i>Ca_Kabuli_Scaffold520</i>  | 143333                         | (A/T)       |
| 15744       | CakSNP15744    | <i>Kabuli</i>    | <i>Ca_Kabuli_Scaffold520</i>  | 143324                         | (G/A)       |
| 15745       | CakSNP15745    | <i>Kabuli</i>    | <i>Ca_Kabuli_Scaffold520</i>  | 143317                         | (T/A)       |
| 15746       | CakSNP15746    | <i>Kabuli</i>    | <i>Ca_Kabuli_Scaffold520</i>  | 143300                         | (G/A)       |
| 15747       | CakSNP15747    | <i>Kabuli</i>    | <i>Ca_Kabuli_Scaffold520</i>  | 143294                         | (G/A)       |
| 15748       | CakSNP15748    | <i>Kabuli</i>    | <i>Ca_Kabuli_Scaffold520</i>  | 143291                         | (G/A)       |
| 15749       | CakSNP15749    | <i>Kabuli</i>    | <i>Ca_Kabuli_Scaffold520</i>  | 143375                         | (G/A)       |
| 15750       | CakSNP15750    | <i>Kabuli</i>    | <i>Ca_Kabuli_Scaffold520</i>  | 143372                         | (G/A)       |
| 15751       | CakSNP15751    | <i>Kabuli</i>    | <i>Ca_Kabuli_Scaffold520</i>  | 143355                         | (C/T)       |
| 15752       | CakSNP15752    | <i>Kabuli</i>    | <i>Ca_Kabuli_Scaffold520</i>  | 143390                         | (A/G)       |
| 15753       | CakSNP15753    | <i>Kabuli</i>    | <i>Ca_Kabuli_Scaffold520</i>  | 143391                         | (A/C)       |
| 15754       | CakSNP15754    | <i>Kabuli</i>    | <i>Ca_Kabuli_Scaffold528</i>  | 191764                         | (A/G)       |

| <b>S.N.</b> | <b>SNP IDs</b> | <b>Cultivars</b> | <b>Chromosomes/scaffolds</b>  | <b>Physical positions (bp)</b> | <b>SNPs</b> |
|-------------|----------------|------------------|-------------------------------|--------------------------------|-------------|
| 15755       | CakSNP15755    | <i>Kabuli</i>    | <i>Ca_Kabuli_Scaffold528</i>  | 191835                         | (A/G)       |
| 15756       | CakSNP15756    | <i>Kabuli</i>    | <i>Ca_Kabuli_Scaffold528</i>  | 232014                         | (A/C)       |
| 15757       | CakSNP15757    | <i>Kabuli</i>    | <i>Ca_Kabuli_Scaffold53</i>   | 49273                          | (A/G)       |
| 15758       | CakSNP15758    | <i>Kabuli</i>    | <i>Ca_Kabuli_Scaffold53</i>   | 123293                         | (C/A)       |
| 15759       | CakSNP15759    | <i>Kabuli</i>    | <i>Ca_Kabuli_Scaffold531</i>  | 2668                           | (C/T)       |
| 15760       | CakSNP15760    | <i>Kabuli</i>    | <i>Ca_Kabuli_Scaffold531</i>  | 2674                           | (C/T)       |
| 15761       | CakSNP15761    | <i>Kabuli</i>    | <i>Ca_Kabuli_Scaffold531</i>  | 65242                          | (T/G)       |
| 15762       | CakSNP15762    | <i>Kabuli</i>    | <i>Ca_Kabuli_Scaffold531</i>  | 101520                         | (C/G)       |
| 15763       | CakSNP15763    | <i>Kabuli</i>    | <i>Ca_Kabuli_Scaffold531</i>  | 124019                         | (T/G)       |
| 15764       | CakSNP15764    | <i>Kabuli</i>    | <i>Ca_Kabuli_Scaffold5328</i> | 70                             | (G/A)       |
| 15765       | CakSNP15765    | <i>Kabuli</i>    | <i>Ca_Kabuli_Scaffold5328</i> | 85                             | (C/T)       |
| 15766       | CakSNP15766    | <i>Kabuli</i>    | <i>Ca_Kabuli_Scaffold5328</i> | 86                             | (C/T)       |
| 15767       | CakSNP15767    | <i>Kabuli</i>    | <i>Ca_Kabuli_Scaffold5328</i> | 117                            | (C/T)       |
| 15768       | CakSNP15768    | <i>Kabuli</i>    | <i>Ca_Kabuli_Scaffold535</i>  | 156836                         | (G/A)       |
| 15769       | CakSNP15769    | <i>Kabuli</i>    | <i>Ca_Kabuli_Scaffold5358</i> | 2561                           | (C/A)       |
| 15770       | CakSNP15770    | <i>Kabuli</i>    | <i>Ca_Kabuli_Scaffold5358</i> | 3329                           | (C/A)       |
| 15771       | CakSNP15771    | <i>Kabuli</i>    | <i>Ca_Kabuli_Scaffold537</i>  | 216656                         | (A/G)       |
| 15772       | CakSNP15772    | <i>Kabuli</i>    | <i>Ca_Kabuli_Scaffold537</i>  | 216669                         | (T/A)       |
| 15773       | CakSNP15773    | <i>Kabuli</i>    | <i>Ca_Kabuli_Scaffold537</i>  | 216846                         | (C/T)       |
| 15774       | CakSNP15774    | <i>Kabuli</i>    | <i>Ca_Kabuli_Scaffold537</i>  | 216829                         | (C/G)       |
| 15775       | CakSNP15775    | <i>Kabuli</i>    | <i>Ca_Kabuli_Scaffold537</i>  | 216778                         | (T/A)       |
| 15776       | CakSNP15776    | <i>Kabuli</i>    | <i>Ca_Kabuli_Scaffold537</i>  | 223108                         | (T/C)       |
| 15777       | CakSNP15777    | <i>Kabuli</i>    | <i>Ca_Kabuli_Scaffold543</i>  | 20780                          | (T/G)       |
| 15778       | CakSNP15778    | <i>Kabuli</i>    | <i>Ca_Kabuli_Scaffold543</i>  | 20819                          | (T/C)       |
| 15779       | CakSNP15779    | <i>Kabuli</i>    | <i>Ca_Kabuli_Scaffold543</i>  | 20827                          | (G/T)       |
| 15780       | CakSNP15780    | <i>Kabuli</i>    | <i>Ca_Kabuli_Scaffold543</i>  | 143169                         | (C/T)       |
| 15781       | CakSNP15781    | <i>Kabuli</i>    | <i>Ca_Kabuli_Scaffold543</i>  | 143182                         | (G/A)       |
| 15782       | CakSNP15782    | <i>Kabuli</i>    | <i>Ca_Kabuli_Scaffold543</i>  | 143185                         | (A/G)       |
| 15783       | CakSNP15783    | <i>Kabuli</i>    | <i>Ca_Kabuli_Scaffold543</i>  | 143191                         | (G/A)       |
| 15784       | CakSNP15784    | <i>Kabuli</i>    | <i>Ca_Kabuli_Scaffold543</i>  | 266748                         | (A/C)       |
| 15785       | CakSNP15785    | <i>Kabuli</i>    | <i>Ca_Kabuli_Scaffold543</i>  | 266729                         | (A/C)       |
| 15786       | CakSNP15786    | <i>Kabuli</i>    | <i>Ca_Kabuli_Scaffold543</i>  | 266848                         | (A/C)       |
| 15787       | CakSNP15787    | <i>Kabuli</i>    | <i>Ca_Kabuli_Scaffold545</i>  | 17699                          | (A/C)       |
| 15788       | CakSNP15788    | <i>Kabuli</i>    | <i>Ca_Kabuli_Scaffold545</i>  | 138848                         | (T/C)       |
| 15789       | CakSNP15789    | <i>Kabuli</i>    | <i>Ca_Kabuli_Scaffold545</i>  | 139118                         | (A/T)       |
| 15790       | CakSNP15790    | <i>Kabuli</i>    | <i>Ca_Kabuli_Scaffold545</i>  | 146720                         | (A/G)       |
| 15791       | CakSNP15791    | <i>Kabuli</i>    | <i>Ca_Kabuli_Scaffold545</i>  | 147549                         | (G/A)       |
| 15792       | CakSNP15792    | <i>Kabuli</i>    | <i>Ca_Kabuli_Scaffold545</i>  | 147568                         | (T/G)       |
| 15793       | CakSNP15793    | <i>Kabuli</i>    | <i>Ca_Kabuli_Scaffold545</i>  | 226799                         | (G/A)       |

| <b>S.N.</b> | <b>SNP IDs</b> | <b>Cultivars</b> | <b>Chromosomes/scaffolds</b>  | <b>Physical positions (bp)</b> | <b>SNPs</b> |
|-------------|----------------|------------------|-------------------------------|--------------------------------|-------------|
| 15794       | CakSNP15794    | <i>Kabuli</i>    | <i>Ca_Kabuli_Scaffold545</i>  | 226769                         | (G/C)       |
| 15795       | CakSNP15795    | <i>Kabuli</i>    | <i>Ca_Kabuli_Scaffold548</i>  | 17462                          | (G/A)       |
| 15796       | CakSNP15796    | <i>Kabuli</i>    | <i>Ca_Kabuli_Scaffold548</i>  | 231396                         | (G/A)       |
| 15797       | CakSNP15797    | <i>Kabuli</i>    | <i>Ca_Kabuli_Scaffold548</i>  | 231338                         | (G/A)       |
| 15798       | CakSNP15798    | <i>Kabuli</i>    | <i>Ca_Kabuli_Scaffold5511</i> | 353                            | (G/A)       |
| 15799       | CakSNP15799    | <i>Kabuli</i>    | <i>Ca_Kabuli_Scaffold5511</i> | 361                            | (G/A)       |
| 15800       | CakSNP15800    | <i>Kabuli</i>    | <i>Ca_Kabuli_Scaffold5511</i> | 366                            | (G/A)       |
| 15801       | CakSNP15801    | <i>Kabuli</i>    | <i>Ca_Kabuli_Scaffold5511</i> | 376                            | (C/T)       |
| 15802       | CakSNP15802    | <i>Kabuli</i>    | <i>Ca_Kabuli_Scaffold5511</i> | 387                            | (T/C)       |
| 15803       | CakSNP15803    | <i>Kabuli</i>    | <i>Ca_Kabuli_Scaffold5511</i> | 388                            | (G/A)       |
| 15804       | CakSNP15804    | <i>Kabuli</i>    | <i>Ca_Kabuli_Scaffold5511</i> | 365                            | (T/G)       |
| 15805       | CakSNP15805    | <i>Kabuli</i>    | <i>Ca_Kabuli_Scaffold5511</i> | 396                            | (G/A)       |
| 15806       | CakSNP15806    | <i>Kabuli</i>    | <i>Ca_Kabuli_Scaffold5511</i> | 458                            | (G/A)       |
| 15807       | CakSNP15807    | <i>Kabuli</i>    | <i>Ca_Kabuli_Scaffold5511</i> | 447                            | (A/C)       |
| 15808       | CakSNP15808    | <i>Kabuli</i>    | <i>Ca_Kabuli_Scaffold5511</i> | 434                            | (C/T)       |
| 15809       | CakSNP15809    | <i>Kabuli</i>    | <i>Ca_Kabuli_Scaffold5511</i> | 404                            | (T/G)       |
| 15810       | CakSNP15810    | <i>Kabuli</i>    | <i>Ca_Kabuli_Scaffold553</i>  | 302105                         | (T/C)       |
| 15811       | CakSNP15811    | <i>Kabuli</i>    | <i>Ca_Kabuli_Scaffold553</i>  | 302098                         | (T/C)       |
| 15812       | CakSNP15812    | <i>Kabuli</i>    | <i>Ca_Kabuli_Scaffold553</i>  | 310715                         | (A/G)       |
| 15813       | CakSNP15813    | <i>Kabuli</i>    | <i>Ca_Kabuli_Scaffold553</i>  | 310759                         | (T/A)       |
| 15814       | CakSNP15814    | <i>Kabuli</i>    | <i>Ca_Kabuli_Scaffold553</i>  | 402702                         | (T/C)       |
| 15815       | CakSNP15815    | <i>Kabuli</i>    | <i>Ca_Kabuli_Scaffold553</i>  | 441845                         | (T/C)       |
| 15816       | CakSNP15816    | <i>Kabuli</i>    | <i>Ca_Kabuli_Scaffold553</i>  | 441881                         | (T/C)       |
| 15817       | CakSNP15817    | <i>Kabuli</i>    | <i>Ca_Kabuli_Scaffold553</i>  | 441898                         | (G/A)       |
| 15818       | CakSNP15818    | <i>Kabuli</i>    | <i>Ca_Kabuli_Scaffold553</i>  | 550789                         | (G/C)       |
| 15819       | CakSNP15819    | <i>Kabuli</i>    | <i>Ca_Kabuli_Scaffold553</i>  | 607503                         | (G/T)       |
| 15820       | CakSNP15820    | <i>Kabuli</i>    | <i>Ca_Kabuli_Scaffold553</i>  | 607572                         | (T/C)       |
| 15821       | CakSNP15821    | <i>Kabuli</i>    | <i>Ca_Kabuli_Scaffold553</i>  | 794383                         | (A/G)       |
| 15822       | CakSNP15822    | <i>Kabuli</i>    | <i>Ca_Kabuli_Scaffold553</i>  | 794404                         | (G/A)       |
| 15823       | CakSNP15823    | <i>Kabuli</i>    | <i>Ca_Kabuli_Scaffold553</i>  | 794431                         | (T/C)       |
| 15824       | CakSNP15824    | <i>Kabuli</i>    | <i>Ca_Kabuli_Scaffold553</i>  | 794439                         | (G/T)       |
| 15825       | CakSNP15825    | <i>Kabuli</i>    | <i>Ca_Kabuli_Scaffold561</i>  | 46046                          | (T/G)       |
| 15826       | CakSNP15826    | <i>Kabuli</i>    | <i>Ca_Kabuli_Scaffold561</i>  | 49174                          | (G/A)       |
| 15827       | CakSNP15827    | <i>Kabuli</i>    | <i>Ca_Kabuli_Scaffold561</i>  | 95414                          | (A/C)       |
| 15828       | CakSNP15828    | <i>Kabuli</i>    | <i>Ca_Kabuli_Scaffold561</i>  | 95386                          | (G/A)       |
| 15829       | CakSNP15829    | <i>Kabuli</i>    | <i>Ca_Kabuli_Scaffold562</i>  | 221706                         | (T/C)       |
| 15830       | CakSNP15830    | <i>Kabuli</i>    | <i>Ca_Kabuli_Scaffold562</i>  | 221696                         | (T/G)       |
| 15831       | CakSNP15831    | <i>Kabuli</i>    | <i>Ca_Kabuli_Scaffold562</i>  | 221686                         | (C/A)       |
| 15832       | CakSNP15832    | <i>Kabuli</i>    | <i>Ca_Kabuli_Scaffold562</i>  | 221713                         | (G/A)       |

| <b>S.N.</b> | <b>SNP IDs</b> | <b>Cultivars</b> | <b>Chromosomes/scaffolds</b>  | <b>Physical positions (bp)</b> | <b>SNPs</b> |
|-------------|----------------|------------------|-------------------------------|--------------------------------|-------------|
| 15833       | CakSNP15833    | <i>Kabuli</i>    | <i>Ca_Kabuli_Scaffold562</i>  | 221714                         | (C/T)       |
| 15834       | CakSNP15834    | <i>Kabuli</i>    | <i>Ca_Kabuli_Scaffold562</i>  | 221735                         | (G/A)       |
| 15835       | CakSNP15835    | <i>Kabuli</i>    | <i>Ca_Kabuli_Scaffold562</i>  | 221795                         | (C/T)       |
| 15836       | CakSNP15836    | <i>Kabuli</i>    | <i>Ca_Kabuli_Scaffold562</i>  | 221748                         | (C/A)       |
| 15837       | CakSNP15837    | <i>Kabuli</i>    | <i>Ca_Kabuli_Scaffold562</i>  | 221758                         | (G/A)       |
| 15838       | CakSNP15838    | <i>Kabuli</i>    | <i>Ca_Kabuli_Scaffold562</i>  | 221769                         | (T/A)       |
| 15839       | CakSNP15839    | <i>Kabuli</i>    | <i>Ca_Kabuli_Scaffold562</i>  | 221778                         | (G/A)       |
| 15840       | CakSNP15840    | <i>Kabuli</i>    | <i>Ca_Kabuli_Scaffold562</i>  | 221779                         | (G/A)       |
| 15841       | CakSNP15841    | <i>Kabuli</i>    | <i>Ca_Kabuli_Scaffold562</i>  | 221788                         | (G/A)       |
| 15842       | CakSNP15842    | <i>Kabuli</i>    | <i>Ca_Kabuli_Scaffold562</i>  | 221828                         | (T/A)       |
| 15843       | CakSNP15843    | <i>Kabuli</i>    | <i>Ca_Kabuli_Scaffold562</i>  | 221792                         | (C/A)       |
| 15844       | CakSNP15844    | <i>Kabuli</i>    | <i>Ca_Kabuli_Scaffold562</i>  | 255362                         | (G/A)       |
| 15845       | CakSNP15845    | <i>Kabuli</i>    | <i>Ca_Kabuli_Scaffold562</i>  | 255295                         | (G/A)       |
| 15846       | CakSNP15846    | <i>Kabuli</i>    | <i>Ca_Kabuli_Scaffold562</i>  | 289080                         | (C/A)       |
| 15847       | CakSNP15847    | <i>Kabuli</i>    | <i>Ca_Kabuli_Scaffold562</i>  | 290071                         | (C/T)       |
| 15848       | CakSNP15848    | <i>Kabuli</i>    | <i>Ca_Kabuli_Scaffold5714</i> | 24882                          | (A/C)       |
| 15849       | CakSNP15849    | <i>Kabuli</i>    | <i>Ca_Kabuli_Scaffold5714</i> | 36359                          | (G/C)       |
| 15850       | CakSNP15850    | <i>Kabuli</i>    | <i>Ca_Kabuli_Scaffold5730</i> | 239                            | (G/A)       |
| 15851       | CakSNP15851    | <i>Kabuli</i>    | <i>Ca_Kabuli_Scaffold5730</i> | 192                            | (A/G)       |
| 15852       | CakSNP15852    | <i>Kabuli</i>    | <i>Ca_Kabuli_Scaffold5730</i> | 227                            | (G/A)       |
| 15853       | CakSNP15853    | <i>Kabuli</i>    | <i>Ca_Kabuli_Scaffold575</i>  | 36084                          | (T/C)       |
| 15854       | CakSNP15854    | <i>Kabuli</i>    | <i>Ca_Kabuli_Scaffold575</i>  | 36135                          | (T/C)       |
| 15855       | CakSNP15855    | <i>Kabuli</i>    | <i>Ca_Kabuli_Scaffold575</i>  | 36238                          | (C/T)       |
| 15856       | CakSNP15856    | <i>Kabuli</i>    | <i>Ca_Kabuli_Scaffold575</i>  | 45254                          | (C/T)       |
| 15857       | CakSNP15857    | <i>Kabuli</i>    | <i>Ca_Kabuli_Scaffold575</i>  | 45250                          | (T/C)       |
| 15858       | CakSNP15858    | <i>Kabuli</i>    | <i>Ca_Kabuli_Scaffold575</i>  | 45239                          | (G/T)       |
| 15859       | CakSNP15859    | <i>Kabuli</i>    | <i>Ca_Kabuli_Scaffold575</i>  | 45236                          | (G/A)       |
| 15860       | CakSNP15860    | <i>Kabuli</i>    | <i>Ca_Kabuli_Scaffold575</i>  | 45233                          | (G/A)       |
| 15861       | CakSNP15861    | <i>Kabuli</i>    | <i>Ca_Kabuli_Scaffold575</i>  | 45215                          | (C/A)       |
| 15862       | CakSNP15862    | <i>Kabuli</i>    | <i>Ca_Kabuli_Scaffold575</i>  | 45192                          | (C/T)       |
| 15863       | CakSNP15863    | <i>Kabuli</i>    | <i>Ca_Kabuli_Scaffold575</i>  | 45279                          | (G/C)       |
| 15864       | CakSNP15864    | <i>Kabuli</i>    | <i>Ca_Kabuli_Scaffold575</i>  | 45245                          | (G/A)       |
| 15865       | CakSNP15865    | <i>Kabuli</i>    | <i>Ca_Kabuli_Scaffold575</i>  | 45237                          | (C/T)       |
| 15866       | CakSNP15866    | <i>Kabuli</i>    | <i>Ca_Kabuli_Scaffold575</i>  | 45234                          | (C/T)       |
| 15867       | CakSNP15867    | <i>Kabuli</i>    | <i>Ca_Kabuli_Scaffold575</i>  | 110772                         | (G/T)       |
| 15868       | CakSNP15868    | <i>Kabuli</i>    | <i>Ca_Kabuli_Scaffold575</i>  | 110785                         | (C/T)       |
| 15869       | CakSNP15869    | <i>Kabuli</i>    | <i>Ca_Kabuli_Scaffold575</i>  | 110765                         | (C/T)       |
| 15870       | CakSNP15870    | <i>Kabuli</i>    | <i>Ca_Kabuli_Scaffold575</i>  | 110759                         | (C/T)       |
| 15871       | CakSNP15871    | <i>Kabuli</i>    | <i>Ca_Kabuli_Scaffold575</i>  | 110753                         | (G/A)       |



| <b>S.N.</b> | <b>SNP IDs</b> | <b>Cultivars</b> | <b>Chromosomes/scaffolds</b>  | <b>Physical positions (bp)</b> | <b>SNPs</b> |
|-------------|----------------|------------------|-------------------------------|--------------------------------|-------------|
| 15872       | CakSNP15872    | <i>Kabuli</i>    | <i>Ca_Kabuli_Scaffold575</i>  | 117287                         | (T/G)       |
| 15873       | CakSNP15873    | <i>Kabuli</i>    | <i>Ca_Kabuli_Scaffold5792</i> | 65166                          | (A/C)       |
| 15874       | CakSNP15874    | <i>Kabuli</i>    | <i>Ca_Kabuli_Scaffold5792</i> | 86779                          | (C/A)       |
| 15875       | CakSNP15875    | <i>Kabuli</i>    | <i>Ca_Kabuli_Scaffold5792</i> | 86716                          | (T/C)       |
| 15876       | CakSNP15876    | <i>Kabuli</i>    | <i>Ca_Kabuli_Scaffold584</i>  | 53203                          | (G/T)       |
| 15877       | CakSNP15877    | <i>Kabuli</i>    | <i>Ca_Kabuli_Scaffold589</i>  | 72891                          | (T/G)       |
| 15878       | CakSNP15878    | <i>Kabuli</i>    | <i>Ca_Kabuli_Scaffold590</i>  | 88429                          | (A/T)       |
| 15879       | CakSNP15879    | <i>Kabuli</i>    | <i>Ca_Kabuli_Scaffold590</i>  | 88420                          | (T/C)       |
| 15880       | CakSNP15880    | <i>Kabuli</i>    | <i>Ca_Kabuli_Scaffold598</i>  | 300825                         | (A/C)       |
| 15881       | CakSNP15881    | <i>Kabuli</i>    | <i>Ca_Kabuli_Scaffold598</i>  | 300940                         | (C/T)       |
| 15882       | CakSNP15882    | <i>Kabuli</i>    | <i>Ca_Kabuli_Scaffold598</i>  | 404254                         | (G/C)       |
| 15883       | CakSNP15883    | <i>Kabuli</i>    | <i>Ca_Kabuli_Scaffold598</i>  | 404275                         | (G/T)       |
| 15884       | CakSNP15884    | <i>Kabuli</i>    | <i>Ca_Kabuli_Scaffold599</i>  | 349605                         | (T/G)       |
| 15885       | CakSNP15885    | <i>Kabuli</i>    | <i>Ca_Kabuli_Scaffold5997</i> | 742                            | (G/C)       |
| 15886       | CakSNP15886    | <i>Kabuli</i>    | <i>Ca_Kabuli_Scaffold5997</i> | 679                            | (C/T)       |
| 15887       | CakSNP15887    | <i>Kabuli</i>    | <i>Ca_Kabuli_Scaffold601</i>  | 55483                          | (A/G)       |
| 15888       | CakSNP15888    | <i>Kabuli</i>    | <i>Ca_Kabuli_Scaffold601</i>  | 71998                          | (T/A)       |
| 15889       | CakSNP15889    | <i>Kabuli</i>    | <i>Ca_Kabuli_Scaffold605</i>  | 23769                          | (A/C)       |
| 15890       | CakSNP15890    | <i>Kabuli</i>    | <i>Ca_Kabuli_Scaffold605</i>  | 23773                          | (T/C)       |
| 15891       | CakSNP15891    | <i>Kabuli</i>    | <i>Ca_Kabuli_Scaffold605</i>  | 23774                          | (A/G)       |
| 15892       | CakSNP15892    | <i>Kabuli</i>    | <i>Ca_Kabuli_Scaffold605</i>  | 23775                          | (A/G)       |
| 15893       | CakSNP15893    | <i>Kabuli</i>    | <i>Ca_Kabuli_Scaffold605</i>  | 23793                          | (A/G)       |
| 15894       | CakSNP15894    | <i>Kabuli</i>    | <i>Ca_Kabuli_Scaffold605</i>  | 23795                          | (T/A)       |
| 15895       | CakSNP15895    | <i>Kabuli</i>    | <i>Ca_Kabuli_Scaffold605</i>  | 23803                          | (A/G)       |
| 15896       | CakSNP15896    | <i>Kabuli</i>    | <i>Ca_Kabuli_Scaffold605</i>  | 23808                          | (C/G)       |
| 15897       | CakSNP15897    | <i>Kabuli</i>    | <i>Ca_Kabuli_Scaffold605</i>  | 23811                          | (G/A)       |
| 15898       | CakSNP15898    | <i>Kabuli</i>    | <i>Ca_Kabuli_Scaffold605</i>  | 23816                          | (T/A)       |
| 15899       | CakSNP15899    | <i>Kabuli</i>    | <i>Ca_Kabuli_Scaffold605</i>  | 84761                          | (A/C)       |
| 15900       | CakSNP15900    | <i>Kabuli</i>    | <i>Ca_Kabuli_Scaffold605</i>  | 84765                          | (T/C)       |
| 15901       | CakSNP15901    | <i>Kabuli</i>    | <i>Ca_Kabuli_Scaffold605</i>  | 84766                          | (A/G)       |
| 15902       | CakSNP15902    | <i>Kabuli</i>    | <i>Ca_Kabuli_Scaffold605</i>  | 84767                          | (A/G)       |
| 15903       | CakSNP15903    | <i>Kabuli</i>    | <i>Ca_Kabuli_Scaffold605</i>  | 84785                          | (A/G)       |
| 15904       | CakSNP15904    | <i>Kabuli</i>    | <i>Ca_Kabuli_Scaffold605</i>  | 84787                          | (T/A)       |
| 15905       | CakSNP15905    | <i>Kabuli</i>    | <i>Ca_Kabuli_Scaffold605</i>  | 84795                          | (A/G)       |
| 15906       | CakSNP15906    | <i>Kabuli</i>    | <i>Ca_Kabuli_Scaffold605</i>  | 84800                          | (C/G)       |
| 15907       | CakSNP15907    | <i>Kabuli</i>    | <i>Ca_Kabuli_Scaffold605</i>  | 84803                          | (G/A)       |
| 15908       | CakSNP15908    | <i>Kabuli</i>    | <i>Ca_Kabuli_Scaffold605</i>  | 84807                          | (A/G)       |
| 15909       | CakSNP15909    | <i>Kabuli</i>    | <i>Ca_Kabuli_Scaffold62</i>   | 46079                          | (C/T)       |
| 15910       | CakSNP15910    | <i>Kabuli</i>    | <i>Ca_Kabuli_Scaffold62</i>   | 46085                          | (C/T)       |

| <b>S.N.</b> | <b>SNP IDs</b> | <b>Cultivars</b> | <b>Chromosomes/scaffolds</b>  | <b>Physical positions (bp)</b> | <b>SNPs</b> |
|-------------|----------------|------------------|-------------------------------|--------------------------------|-------------|
| 15911       | CakSNP15911    | <i>Kabuli</i>    | <i>Ca_Kabuli_Scaffold62</i>   | 46087                          | (G/A)       |
| 15912       | CakSNP15912    | <i>Kabuli</i>    | <i>Ca_Kabuli_Scaffold62</i>   | 46088                          | (C/T)       |
| 15913       | CakSNP15913    | <i>Kabuli</i>    | <i>Ca_Kabuli_Scaffold624</i>  | 254901                         | (C/T)       |
| 15914       | CakSNP15914    | <i>Kabuli</i>    | <i>Ca_Kabuli_Scaffold624</i>  | 254950                         | (G/A)       |
| 15915       | CakSNP15915    | <i>Kabuli</i>    | <i>Ca_Kabuli_Scaffold624</i>  | 254959                         | (T/C)       |
| 15916       | CakSNP15916    | <i>Kabuli</i>    | <i>Ca_Kabuli_Scaffold624</i>  | 254971                         | (G/A)       |
| 15917       | CakSNP15917    | <i>Kabuli</i>    | <i>Ca_Kabuli_Scaffold624</i>  | 254992                         | (C/T)       |
| 15918       | CakSNP15918    | <i>Kabuli</i>    | <i>Ca_Kabuli_Scaffold624</i>  | 254942                         | (A/T)       |
| 15919       | CakSNP15919    | <i>Kabuli</i>    | <i>Ca_Kabuli_Scaffold6339</i> | 190                            | (T/G)       |
| 15920       | CakSNP15920    | <i>Kabuli</i>    | <i>Ca_Kabuli_Scaffold6367</i> | 6825                           | (G/T)       |
| 15921       | CakSNP15921    | <i>Kabuli</i>    | <i>Ca_Kabuli_Scaffold6367</i> | 10856                          | (T/G)       |
| 15922       | CakSNP15922    | <i>Kabuli</i>    | <i>Ca_Kabuli_Scaffold6367</i> | 10842                          | (T/A)       |
| 15923       | CakSNP15923    | <i>Kabuli</i>    | <i>Ca_Kabuli_Scaffold6367</i> | 13651                          | (G/A)       |
| 15924       | CakSNP15924    | <i>Kabuli</i>    | <i>Ca_Kabuli_Scaffold6367</i> | 23667                          | (G/A)       |
| 15925       | CakSNP15925    | <i>Kabuli</i>    | <i>Ca_Kabuli_Scaffold6367</i> | 25674                          | (T/C)       |
| 15926       | CakSNP15926    | <i>Kabuli</i>    | <i>Ca_Kabuli_Scaffold637</i>  | 107671                         | (G/C)       |
| 15927       | CakSNP15927    | <i>Kabuli</i>    | <i>Ca_Kabuli_Scaffold637</i>  | 107661                         | (A/C)       |
| 15928       | CakSNP15928    | <i>Kabuli</i>    | <i>Ca_Kabuli_Scaffold637</i>  | 107636                         | (T/C)       |
| 15929       | CakSNP15929    | <i>Kabuli</i>    | <i>Ca_Kabuli_Scaffold637</i>  | 107613                         | (C/G)       |
| 15930       | CakSNP15930    | <i>Kabuli</i>    | <i>Ca_Kabuli_Scaffold6403</i> | 1553                           | (T/A)       |
| 15931       | CakSNP15931    | <i>Kabuli</i>    | <i>Ca_Kabuli_Scaffold642</i>  | 28715                          | (A/T)       |
| 15932       | CakSNP15932    | <i>Kabuli</i>    | <i>Ca_Kabuli_Scaffold642</i>  | 615176                         | (T/C)       |
| 15933       | CakSNP15933    | <i>Kabuli</i>    | <i>Ca_Kabuli_Scaffold645</i>  | 91908                          | (C/T)       |
| 15934       | CakSNP15934    | <i>Kabuli</i>    | <i>Ca_Kabuli_Scaffold653</i>  | 145231                         | (A/G)       |
| 15935       | CakSNP15935    | <i>Kabuli</i>    | <i>Ca_Kabuli_Scaffold653</i>  | 183054                         | (T/C)       |
| 15936       | CakSNP15936    | <i>Kabuli</i>    | <i>Ca_Kabuli_Scaffold653</i>  | 183063                         | (G/A)       |
| 15937       | CakSNP15937    | <i>Kabuli</i>    | <i>Ca_Kabuli_Scaffold653</i>  | 183069                         | (C/A)       |
| 15938       | CakSNP15938    | <i>Kabuli</i>    | <i>Ca_Kabuli_Scaffold653</i>  | 183074                         | (C/G)       |
| 15939       | CakSNP15939    | <i>Kabuli</i>    | <i>Ca_Kabuli_Scaffold653</i>  | 183078                         | (T/G)       |
| 15940       | CakSNP15940    | <i>Kabuli</i>    | <i>Ca_Kabuli_Scaffold653</i>  | 183091                         | (T/C)       |
| 15941       | CakSNP15941    | <i>Kabuli</i>    | <i>Ca_Kabuli_Scaffold653</i>  | 183143                         | (T/A)       |
| 15942       | CakSNP15942    | <i>Kabuli</i>    | <i>Ca_Kabuli_Scaffold653</i>  | 183135                         | (T/C)       |
| 15943       | CakSNP15943    | <i>Kabuli</i>    | <i>Ca_Kabuli_Scaffold653</i>  | 183112                         | (T/C)       |
| 15944       | CakSNP15944    | <i>Kabuli</i>    | <i>Ca_Kabuli_Scaffold653</i>  | 189129                         | (C/T)       |
| 15945       | CakSNP15945    | <i>Kabuli</i>    | <i>Ca_Kabuli_Scaffold653</i>  | 197878                         | (A/T)       |
| 15946       | CakSNP15946    | <i>Kabuli</i>    | <i>Ca_Kabuli_Scaffold661</i>  | 180364                         | (G/T)       |
| 15947       | CakSNP15947    | <i>Kabuli</i>    | <i>Ca_Kabuli_Scaffold661</i>  | 180362                         | (A/C)       |
| 15948       | CakSNP15948    | <i>Kabuli</i>    | <i>Ca_Kabuli_Scaffold661</i>  | 180348                         | (C/T)       |
| 15949       | CakSNP15949    | <i>Kabuli</i>    | <i>Ca_Kabuli_Scaffold661</i>  | 180302                         | (G/T)       |

| <b>S.N.</b> | <b>SNP IDs</b> | <b>Cultivars</b> | <b>Chromosomes/scaffolds</b> | <b>Physical positions (bp)</b> | <b>SNPs</b> |
|-------------|----------------|------------------|------------------------------|--------------------------------|-------------|
| 15950       | CakSNP15950    | <i>Kabuli</i>    | <i>Ca_Kabuli_Scaffold661</i> | 311222                         | (G/T)       |
| 15951       | CakSNP15951    | <i>Kabuli</i>    | <i>Ca_Kabuli_Scaffold661</i> | 311182                         | (C/T)       |
| 15952       | CakSNP15952    | <i>Kabuli</i>    | <i>Ca_Kabuli_Scaffold663</i> | 16068                          | (G/A)       |
| 15953       | CakSNP15953    | <i>Kabuli</i>    | <i>Ca_Kabuli_Scaffold663</i> | 16042                          | (C/A)       |
| 15954       | CakSNP15954    | <i>Kabuli</i>    | <i>Ca_Kabuli_Scaffold663</i> | 16029                          | (G/A)       |
| 15955       | CakSNP15955    | <i>Kabuli</i>    | <i>Ca_Kabuli_Scaffold663</i> | 16056                          | (C/T)       |
| 15956       | CakSNP15956    | <i>Kabuli</i>    | <i>Ca_Kabuli_Scaffold663</i> | 16059                          | (G/A)       |
| 15957       | CakSNP15957    | <i>Kabuli</i>    | <i>Ca_Kabuli_Scaffold663</i> | 16061                          | (A/G)       |
| 15958       | CakSNP15958    | <i>Kabuli</i>    | <i>Ca_Kabuli_Scaffold663</i> | 156613                         | (G/C)       |
| 15959       | CakSNP15959    | <i>Kabuli</i>    | <i>Ca_Kabuli_Scaffold674</i> | 91979                          | (T/A)       |
| 15960       | CakSNP15960    | <i>Kabuli</i>    | <i>Ca_Kabuli_Scaffold674</i> | 360388                         | (C/T)       |
| 15961       | CakSNP15961    | <i>Kabuli</i>    | <i>Ca_Kabuli_Scaffold674</i> | 360401                         | (A/G)       |
| 15962       | CakSNP15962    | <i>Kabuli</i>    | <i>Ca_Kabuli_Scaffold674</i> | 360421                         | (G/A)       |
| 15963       | CakSNP15963    | <i>Kabuli</i>    | <i>Ca_Kabuli_Scaffold674</i> | 360406                         | (C/T)       |
| 15964       | CakSNP15964    | <i>Kabuli</i>    | <i>Ca_Kabuli_Scaffold674</i> | 360349                         | (G/A)       |
| 15965       | CakSNP15965    | <i>Kabuli</i>    | <i>Ca_Kabuli_Scaffold674</i> | 360464                         | (G/A)       |
| 15966       | CakSNP15966    | <i>Kabuli</i>    | <i>Ca_Kabuli_Scaffold674</i> | 360457                         | (G/C)       |
| 15967       | CakSNP15967    | <i>Kabuli</i>    | <i>Ca_Kabuli_Scaffold674</i> | 360411                         | (G/A)       |
| 15968       | CakSNP15968    | <i>Kabuli</i>    | <i>Ca_Kabuli_Scaffold674</i> | 360408                         | (G/T)       |
| 15969       | CakSNP15969    | <i>Kabuli</i>    | <i>Ca_Kabuli_Scaffold674</i> | 608623                         | (T/G)       |
| 15970       | CakSNP15970    | <i>Kabuli</i>    | <i>Ca_Kabuli_Scaffold674</i> | 652382                         | (G/A)       |
| 15971       | CakSNP15971    | <i>Kabuli</i>    | <i>Ca_Kabuli_Scaffold674</i> | 652373                         | (A/G)       |
| 15972       | CakSNP15972    | <i>Kabuli</i>    | <i>Ca_Kabuli_Scaffold674</i> | 826136                         | (T/C)       |
| 15973       | CakSNP15973    | <i>Kabuli</i>    | <i>Ca_Kabuli_Scaffold681</i> | 18376                          | (C/G)       |
| 15974       | CakSNP15974    | <i>Kabuli</i>    | <i>Ca_Kabuli_Scaffold682</i> | 157238                         | (G/C)       |
| 15975       | CakSNP15975    | <i>Kabuli</i>    | <i>Ca_Kabuli_Scaffold682</i> | 578200                         | (T/G)       |
| 15976       | CakSNP15976    | <i>Kabuli</i>    | <i>Ca_Kabuli_Scaffold684</i> | 78894                          | (G/A)       |
| 15977       | CakSNP15977    | <i>Kabuli</i>    | <i>Ca_Kabuli_Scaffold684</i> | 78883                          | (T/G)       |
| 15978       | CakSNP15978    | <i>Kabuli</i>    | <i>Ca_Kabuli_Scaffold684</i> | 78871                          | (C/G)       |
| 15979       | CakSNP15979    | <i>Kabuli</i>    | <i>Ca_Kabuli_Scaffold684</i> | 78842                          | (G/A)       |
| 15980       | CakSNP15980    | <i>Kabuli</i>    | <i>Ca_Kabuli_Scaffold684</i> | 78844                          | (A/G)       |
| 15981       | CakSNP15981    | <i>Kabuli</i>    | <i>Ca_Kabuli_Scaffold684</i> | 78864                          | (C/T)       |
| 15982       | CakSNP15982    | <i>Kabuli</i>    | <i>Ca_Kabuli_Scaffold684</i> | 78893                          | (C/T)       |
| 15983       | CakSNP15983    | <i>Kabuli</i>    | <i>Ca_Kabuli_Scaffold686</i> | 206111                         | (G/A)       |
| 15984       | CakSNP15984    | <i>Kabuli</i>    | <i>Ca_Kabuli_Scaffold686</i> | 206044                         | (T/C)       |
| 15985       | CakSNP15985    | <i>Kabuli</i>    | <i>Ca_Kabuli_Scaffold686</i> | 206042                         | (A/G)       |
| 15986       | CakSNP15986    | <i>Kabuli</i>    | <i>Ca_Kabuli_Scaffold702</i> | 247644                         | (G/C)       |
| 15987       | CakSNP15987    | <i>Kabuli</i>    | <i>Ca_Kabuli_Scaffold711</i> | 153694                         | (C/T)       |
| 15988       | CakSNP15988    | <i>Kabuli</i>    | <i>Ca_Kabuli_Scaffold711</i> | 153680                         | (C/A)       |

| <b>S.N.</b> | <b>SNP IDs</b> | <b>Cultivars</b> | <b>Chromosomes/scaffolds</b>  | <b>Physical positions (bp)</b> | <b>SNPs</b> |
|-------------|----------------|------------------|-------------------------------|--------------------------------|-------------|
| 15989       | CakSNP15989    | <i>Kabuli</i>    | <i>Ca_Kabuli_Scaffold711</i>  | 153667                         | (G/A)       |
| 15990       | CakSNP15990    | <i>Kabuli</i>    | <i>Ca_Kabuli_Scaffold711</i>  | 153697                         | (G/A)       |
| 15991       | CakSNP15991    | <i>Kabuli</i>    | <i>Ca_Kabuli_Scaffold711</i>  | 153699                         | (A/G)       |
| 15992       | CakSNP15992    | <i>Kabuli</i>    | <i>Ca_Kabuli_Scaffold711</i>  | 153706                         | (G/A)       |
| 15993       | CakSNP15993    | <i>Kabuli</i>    | <i>Ca_Kabuli_Scaffold7127</i> | 1878                           | (C/T)       |
| 15994       | CakSNP15994    | <i>Kabuli</i>    | <i>Ca_Kabuli_Scaffold7144</i> | 234                            | (A/T)       |
| 15995       | CakSNP15995    | <i>Kabuli</i>    | <i>Ca_Kabuli_Scaffold716</i>  | 128208                         | (G/T)       |
| 15996       | CakSNP15996    | <i>Kabuli</i>    | <i>Ca_Kabuli_Scaffold716</i>  | 212326                         | (G/A)       |
| 15997       | CakSNP15997    | <i>Kabuli</i>    | <i>Ca_Kabuli_Scaffold716</i>  | 212374                         | (G/A)       |
| 15998       | CakSNP15998    | <i>Kabuli</i>    | <i>Ca_Kabuli_Scaffold716</i>  | 269220                         | (T/C)       |
| 15999       | CakSNP15999    | <i>Kabuli</i>    | <i>Ca_Kabuli_Scaffold716</i>  | 269230                         | (A/C)       |
| 16000       | CakSNP16000    | <i>Kabuli</i>    | <i>Ca_Kabuli_Scaffold716</i>  | 269242                         | (A/G)       |
| 16001       | CakSNP16001    | <i>Kabuli</i>    | <i>Ca_Kabuli_Scaffold716</i>  | 269266                         | (G/T)       |
| 16002       | CakSNP16002    | <i>Kabuli</i>    | <i>Ca_Kabuli_Scaffold716</i>  | 269271                         | (G/A)       |
| 16003       | CakSNP16003    | <i>Kabuli</i>    | <i>Ca_Kabuli_Scaffold716</i>  | 269281                         | (T/G)       |
| 16004       | CakSNP16004    | <i>Kabuli</i>    | <i>Ca_Kabuli_Scaffold716</i>  | 269287                         | (G/A)       |
| 16005       | CakSNP16005    | <i>Kabuli</i>    | <i>Ca_Kabuli_Scaffold716</i>  | 269335                         | (G/A)       |
| 16006       | CakSNP16006    | <i>Kabuli</i>    | <i>Ca_Kabuli_Scaffold716</i>  | 269332                         | (C/T)       |
| 16007       | CakSNP16007    | <i>Kabuli</i>    | <i>Ca_Kabuli_Scaffold716</i>  | 269314                         | (G/A)       |
| 16008       | CakSNP16008    | <i>Kabuli</i>    | <i>Ca_Kabuli_Scaffold716</i>  | 269299                         | (T/C)       |
| 16009       | CakSNP16009    | <i>Kabuli</i>    | <i>Ca_Kabuli_Scaffold719</i>  | 11850                          | (C/T)       |
| 16010       | CakSNP16010    | <i>Kabuli</i>    | <i>Ca_Kabuli_Scaffold720</i>  | 60880                          | (G/A)       |
| 16011       | CakSNP16011    | <i>Kabuli</i>    | <i>Ca_Kabuli_Scaffold720</i>  | 370624                         | (T/G)       |
| 16012       | CakSNP16012    | <i>Kabuli</i>    | <i>Ca_Kabuli_Scaffold720</i>  | 370639                         | (T/A)       |
| 16013       | CakSNP16013    | <i>Kabuli</i>    | <i>Ca_Kabuli_Scaffold720</i>  | 370725                         | (G/A)       |
| 16014       | CakSNP16014    | <i>Kabuli</i>    | <i>Ca_Kabuli_Scaffold724</i>  | 25019                          | (G/A)       |
| 16015       | CakSNP16015    | <i>Kabuli</i>    | <i>Ca_Kabuli_Scaffold724</i>  | 25722                          | (G/C)       |
| 16016       | CakSNP16016    | <i>Kabuli</i>    | <i>Ca_Kabuli_Scaffold731</i>  | 315093                         | (G/A)       |
| 16017       | CakSNP16017    | <i>Kabuli</i>    | <i>Ca_Kabuli_Scaffold731</i>  | 315114                         | (C/T)       |
| 16018       | CakSNP16018    | <i>Kabuli</i>    | <i>Ca_Kabuli_Scaffold731</i>  | 315135                         | (G/T)       |
| 16019       | CakSNP16019    | <i>Kabuli</i>    | <i>Ca_Kabuli_Scaffold731</i>  | 315138                         | (C/T)       |
| 16020       | CakSNP16020    | <i>Kabuli</i>    | <i>Ca_Kabuli_Scaffold731</i>  | 315141                         | (G/A)       |
| 16021       | CakSNP16021    | <i>Kabuli</i>    | <i>Ca_Kabuli_Scaffold731</i>  | 332497                         | (G/A)       |
| 16022       | CakSNP16022    | <i>Kabuli</i>    | <i>Ca_Kabuli_Scaffold731</i>  | 332468                         | (G/T)       |
| 16023       | CakSNP16023    | <i>Kabuli</i>    | <i>Ca_Kabuli_Scaffold731</i>  | 332467                         | (G/C)       |
| 16024       | CakSNP16024    | <i>Kabuli</i>    | <i>Ca_Kabuli_Scaffold731</i>  | 332465                         | (T/A)       |
| 16025       | CakSNP16025    | <i>Kabuli</i>    | <i>Ca_Kabuli_Scaffold731</i>  | 332464                         | (G/T)       |
| 16026       | CakSNP16026    | <i>Kabuli</i>    | <i>Ca_Kabuli_Scaffold731</i>  | 332458                         | (A/T)       |
| 16027       | CakSNP16027    | <i>Kabuli</i>    | <i>Ca_Kabuli_Scaffold731</i>  | 332528                         | (G/C)       |

| <b>S.N.</b> | <b>SNP IDs</b> | <b>Cultivars</b> | <b>Chromosomes/scaffolds</b>  | <b>Physical positions (bp)</b> | <b>SNPs</b> |
|-------------|----------------|------------------|-------------------------------|--------------------------------|-------------|
| 16028       | CakSNP16028    | <i>Kabuli</i>    | <i>Ca_Kabuli_Scaffold731</i>  | 357674                         | (G/A)       |
| 16029       | CakSNP16029    | <i>Kabuli</i>    | <i>Ca_Kabuli_Scaffold731</i>  | 357645                         | (G/T)       |
| 16030       | CakSNP16030    | <i>Kabuli</i>    | <i>Ca_Kabuli_Scaffold731</i>  | 357644                         | (G/C)       |
| 16031       | CakSNP16031    | <i>Kabuli</i>    | <i>Ca_Kabuli_Scaffold731</i>  | 357642                         | (T/A)       |
| 16032       | CakSNP16032    | <i>Kabuli</i>    | <i>Ca_Kabuli_Scaffold731</i>  | 357641                         | (G/T)       |
| 16033       | CakSNP16033    | <i>Kabuli</i>    | <i>Ca_Kabuli_Scaffold731</i>  | 357635                         | (A/T)       |
| 16034       | CakSNP16034    | <i>Kabuli</i>    | <i>Ca_Kabuli_Scaffold731</i>  | 357715                         | (A/T)       |
| 16035       | CakSNP16035    | <i>Kabuli</i>    | <i>Ca_Kabuli_Scaffold731</i>  | 362123                         | (G/A)       |
| 16036       | CakSNP16036    | <i>Kabuli</i>    | <i>Ca_Kabuli_Scaffold731</i>  | 362118                         | (C/A)       |
| 16037       | CakSNP16037    | <i>Kabuli</i>    | <i>Ca_Kabuli_Scaffold731</i>  | 362114                         | (A/C)       |
| 16038       | CakSNP16038    | <i>Kabuli</i>    | <i>Ca_Kabuli_Scaffold731</i>  | 362548                         | (T/A)       |
| 16039       | CakSNP16039    | <i>Kabuli</i>    | <i>Ca_Kabuli_Scaffold731</i>  | 362553                         | (C/T)       |
| 16040       | CakSNP16040    | <i>Kabuli</i>    | <i>Ca_Kabuli_Scaffold731</i>  | 362554                         | (T/A)       |
| 16041       | CakSNP16041    | <i>Kabuli</i>    | <i>Ca_Kabuli_Scaffold731</i>  | 362555                         | (T/G)       |
| 16042       | CakSNP16042    | <i>Kabuli</i>    | <i>Ca_Kabuli_Scaffold731</i>  | 362556                         | (C/A)       |
| 16043       | CakSNP16043    | <i>Kabuli</i>    | <i>Ca_Kabuli_Scaffold731</i>  | 362574                         | (T/C)       |
| 16044       | CakSNP16044    | <i>Kabuli</i>    | <i>Ca_Kabuli_Scaffold731</i>  | 362581                         | (A/G)       |
| 16045       | CakSNP16045    | <i>Kabuli</i>    | <i>Ca_Kabuli_Scaffold731</i>  | 362582                         | (T/C)       |
| 16046       | CakSNP16046    | <i>Kabuli</i>    | <i>Ca_Kabuli_Scaffold731</i>  | 362594                         | (G/T)       |
| 16047       | CakSNP16047    | <i>Kabuli</i>    | <i>Ca_Kabuli_Scaffold731</i>  | 362610                         | (C/T)       |
| 16048       | CakSNP16048    | <i>Kabuli</i>    | <i>Ca_Kabuli_Scaffold731</i>  | 372255                         | (G/A)       |
| 16049       | CakSNP16049    | <i>Kabuli</i>    | <i>Ca_Kabuli_Scaffold731</i>  | 372253                         | (G/T)       |
| 16050       | CakSNP16050    | <i>Kabuli</i>    | <i>Ca_Kabuli_Scaffold731</i>  | 372250                         | (G/A)       |
| 16051       | CakSNP16051    | <i>Kabuli</i>    | <i>Ca_Kabuli_Scaffold731</i>  | 372244                         | (C/T)       |
| 16052       | CakSNP16052    | <i>Kabuli</i>    | <i>Ca_Kabuli_Scaffold731</i>  | 372243                         | (A/T)       |
| 16053       | CakSNP16053    | <i>Kabuli</i>    | <i>Ca_Kabuli_Scaffold731</i>  | 372215                         | (A/G)       |
| 16054       | CakSNP16054    | <i>Kabuli</i>    | <i>Ca_Kabuli_Scaffold731</i>  | 372209                         | (G/C)       |
| 16055       | CakSNP16055    | <i>Kabuli</i>    | <i>Ca_Kabuli_Scaffold731</i>  | 372183                         | (C/T)       |
| 16056       | CakSNP16056    | <i>Kabuli</i>    | <i>Ca_Kabuli_Scaffold731</i>  | 372959                         | (A/C)       |
| 16057       | CakSNP16057    | <i>Kabuli</i>    | <i>Ca_Kabuli_Scaffold7355</i> | 1606                           | (C/G)       |
| 16058       | CakSNP16058    | <i>Kabuli</i>    | <i>Ca_Kabuli_Scaffold7355</i> | 1690                           | (T/C)       |
| 16059       | CakSNP16059    | <i>Kabuli</i>    | <i>Ca_Kabuli_Scaffold7355</i> | 3608                           | (A/G)       |
| 16060       | CakSNP16060    | <i>Kabuli</i>    | <i>Ca_Kabuli_Scaffold7355</i> | 3602                           | (T/C)       |
| 16061       | CakSNP16061    | <i>Kabuli</i>    | <i>Ca_Kabuli_Scaffold7355</i> | 3578                           | (C/T)       |
| 16062       | CakSNP16062    | <i>Kabuli</i>    | <i>Ca_Kabuli_Scaffold7355</i> | 3572                           | (A/G)       |
| 16063       | CakSNP16063    | <i>Kabuli</i>    | <i>Ca_Kabuli_Scaffold7355</i> | 3566                           | (C/T)       |
| 16064       | CakSNP16064    | <i>Kabuli</i>    | <i>Ca_Kabuli_Scaffold752</i>  | 382375                         | (G/A)       |
| 16065       | CakSNP16065    | <i>Kabuli</i>    | <i>Ca_Kabuli_Scaffold752</i>  | 497452                         | (T/A)       |
| 16066       | CakSNP16066    | <i>Kabuli</i>    | <i>Ca_Kabuli_Scaffold752</i>  | 497454                         | (A/G)       |

| <b>S.N.</b> | <b>SNP IDs</b> | <b>Cultivars</b> | <b>Chromosomes/scaffolds</b>  | <b>Physical positions (bp)</b> | <b>SNPs</b> |
|-------------|----------------|------------------|-------------------------------|--------------------------------|-------------|
| 16067       | CakSNP16067    | <i>Kabuli</i>    | <i>Ca_Kabuli_Scaffold753</i>  | 8312                           | (A/G)       |
| 16068       | CakSNP16068    | <i>Kabuli</i>    | <i>Ca_Kabuli_Scaffold758</i>  | 16480                          | (G/T)       |
| 16069       | CakSNP16069    | <i>Kabuli</i>    | <i>Ca_Kabuli_Scaffold7650</i> | 2686                           | (C/T)       |
| 16070       | CakSNP16070    | <i>Kabuli</i>    | <i>Ca_Kabuli_Scaffold7715</i> | 3434                           | (A/T)       |
| 16071       | CakSNP16071    | <i>Kabuli</i>    | <i>Ca_Kabuli_Scaffold772</i>  | 53192                          | (C/T)       |
| 16072       | CakSNP16072    | <i>Kabuli</i>    | <i>Ca_Kabuli_Scaffold772</i>  | 53196                          | (C/T)       |
| 16073       | CakSNP16073    | <i>Kabuli</i>    | <i>Ca_Kabuli_Scaffold775</i>  | 89238                          | (T/C)       |
| 16074       | CakSNP16074    | <i>Kabuli</i>    | <i>Ca_Kabuli_Scaffold775</i>  | 89239                          | (C/T)       |
| 16075       | CakSNP16075    | <i>Kabuli</i>    | <i>Ca_Kabuli_Scaffold775</i>  | 279828                         | (A/G)       |
| 16076       | CakSNP16076    | <i>Kabuli</i>    | <i>Ca_Kabuli_Scaffold775</i>  | 356107                         | (C/A)       |
| 16077       | CakSNP16077    | <i>Kabuli</i>    | <i>Ca_Kabuli_Scaffold775</i>  | 448604                         | (G/A)       |
| 16078       | CakSNP16078    | <i>Kabuli</i>    | <i>Ca_Kabuli_Scaffold775</i>  | 448743                         | (T/C)       |
| 16079       | CakSNP16079    | <i>Kabuli</i>    | <i>Ca_Kabuli_Scaffold776</i>  | 188906                         | (C/T)       |
| 16080       | CakSNP16080    | <i>Kabuli</i>    | <i>Ca_Kabuli_Scaffold776</i>  | 188895                         | (C/T)       |
| 16081       | CakSNP16081    | <i>Kabuli</i>    | <i>Ca_Kabuli_Scaffold776</i>  | 188888                         | (G/A)       |
| 16082       | CakSNP16082    | <i>Kabuli</i>    | <i>Ca_Kabuli_Scaffold7765</i> | 503                            | (C/T)       |
| 16083       | CakSNP16083    | <i>Kabuli</i>    | <i>Ca_Kabuli_Scaffold7765</i> | 536                            | (C/A)       |
| 16084       | CakSNP16084    | <i>Kabuli</i>    | <i>Ca_Kabuli_Scaffold7765</i> | 549                            | (G/A)       |
| 16085       | CakSNP16085    | <i>Kabuli</i>    | <i>Ca_Kabuli_Scaffold783</i>  | 201617                         | (T/C)       |
| 16086       | CakSNP16086    | <i>Kabuli</i>    | <i>Ca_Kabuli_Scaffold783</i>  | 244209                         | (T/C)       |
| 16087       | CakSNP16087    | <i>Kabuli</i>    | <i>Ca_Kabuli_Scaffold7842</i> | 727                            | (C/T)       |
| 16088       | CakSNP16088    | <i>Kabuli</i>    | <i>Ca_Kabuli_Scaffold7842</i> | 1078                           | (G/A)       |
| 16089       | CakSNP16089    | <i>Kabuli</i>    | <i>Ca_Kabuli_Scaffold7842</i> | 1075                           | (C/T)       |
| 16090       | CakSNP16090    | <i>Kabuli</i>    | <i>Ca_Kabuli_Scaffold7842</i> | 1068                           | (C/A)       |
| 16091       | CakSNP16091    | <i>Kabuli</i>    | <i>Ca_Kabuli_Scaffold7842</i> | 1042                           | (T/C)       |
| 16092       | CakSNP16092    | <i>Kabuli</i>    | <i>Ca_Kabuli_Scaffold7842</i> | 1024                           | (T/G)       |
| 16093       | CakSNP16093    | <i>Kabuli</i>    | <i>Ca_Kabuli_Scaffold787</i>  | 4363                           | (A/G)       |
| 16094       | CakSNP16094    | <i>Kabuli</i>    | <i>Ca_Kabuli_Scaffold794</i>  | 50197                          | (T/G)       |
| 16095       | CakSNP16095    | <i>Kabuli</i>    | <i>Ca_Kabuli_Scaffold794</i>  | 50201                          | (T/G)       |
| 16096       | CakSNP16096    | <i>Kabuli</i>    | <i>Ca_Kabuli_Scaffold794</i>  | 50225                          | (C/G)       |
| 16097       | CakSNP16097    | <i>Kabuli</i>    | <i>Ca_Kabuli_Scaffold794</i>  | 50239                          | (G/A)       |
| 16098       | CakSNP16098    | <i>Kabuli</i>    | <i>Ca_Kabuli_Scaffold794</i>  | 50240                          | (C/A)       |
| 16099       | CakSNP16099    | <i>Kabuli</i>    | <i>Ca_Kabuli_Scaffold794</i>  | 50236                          | (A/G)       |
| 16100       | CakSNP16100    | <i>Kabuli</i>    | <i>Ca_Kabuli_Scaffold799</i>  | 3956                           | (G/A)       |
| 16101       | CakSNP16101    | <i>Kabuli</i>    | <i>Ca_Kabuli_Scaffold799</i>  | 3930                           | (A/G)       |
| 16102       | CakSNP16102    | <i>Kabuli</i>    | <i>Ca_Kabuli_Scaffold799</i>  | 3928                           | (C/T)       |
| 16103       | CakSNP16103    | <i>Kabuli</i>    | <i>Ca_Kabuli_Scaffold801</i>  | 67115                          | (C/T)       |
| 16104       | CakSNP16104    | <i>Kabuli</i>    | <i>Ca_Kabuli_Scaffold806</i>  | 129263                         | (A/G)       |
| 16105       | CakSNP16105    | <i>Kabuli</i>    | <i>Ca_Kabuli_Scaffold806</i>  | 129265                         | (G/T)       |

| <b>S.N.</b> | <b>SNP IDs</b> | <b>Cultivars</b> | <b>Chromosomes/scaffolds</b>  | <b>Physical positions (bp)</b> | <b>SNPs</b> |
|-------------|----------------|------------------|-------------------------------|--------------------------------|-------------|
| 16106       | CakSNP16106    | <i>Kabuli</i>    | <i>Ca_Kabuli_Scaffold809</i>  | 48678                          | (T/C)       |
| 16107       | CakSNP16107    | <i>Kabuli</i>    | <i>Ca_Kabuli_Scaffold809</i>  | 48650                          | (C/A)       |
| 16108       | CakSNP16108    | <i>Kabuli</i>    | <i>Ca_Kabuli_Scaffold809</i>  | 53417                          | (C/G)       |
| 16109       | CakSNP16109    | <i>Kabuli</i>    | <i>Ca_Kabuli_Scaffold809</i>  | 53425                          | (T/C)       |
| 16110       | CakSNP16110    | <i>Kabuli</i>    | <i>Ca_Kabuli_Scaffold809</i>  | 53431                          | (G/A)       |
| 16111       | CakSNP16111    | <i>Kabuli</i>    | <i>Ca_Kabuli_Scaffold809</i>  | 53444                          | (G/A)       |
| 16112       | CakSNP16112    | <i>Kabuli</i>    | <i>Ca_Kabuli_Scaffold809</i>  | 53474                          | (G/A)       |
| 16113       | CakSNP16113    | <i>Kabuli</i>    | <i>Ca_Kabuli_Scaffold809</i>  | 53464                          | (G/A)       |
| 16114       | CakSNP16114    | <i>Kabuli</i>    | <i>Ca_Kabuli_Scaffold809</i>  | 53470                          | (C/G)       |
| 16115       | CakSNP16115    | <i>Kabuli</i>    | <i>Ca_Kabuli_Scaffold811</i>  | 81373                          | (C/T)       |
| 16116       | CakSNP16116    | <i>Kabuli</i>    | <i>Ca_Kabuli_Scaffold812</i>  | 34686                          | (C/T)       |
| 16117       | CakSNP16117    | <i>Kabuli</i>    | <i>Ca_Kabuli_Scaffold812</i>  | 246208                         | (A/C)       |
| 16118       | CakSNP16118    | <i>Kabuli</i>    | <i>Ca_Kabuli_Scaffold812</i>  | 332746                         | (T/C)       |
| 16119       | CakSNP16119    | <i>Kabuli</i>    | <i>Ca_Kabuli_Scaffold812</i>  | 332758                         | (T/C)       |
| 16120       | CakSNP16120    | <i>Kabuli</i>    | <i>Ca_Kabuli_Scaffold812</i>  | 528815                         | (C/G)       |
| 16121       | CakSNP16121    | <i>Kabuli</i>    | <i>Ca_Kabuli_Scaffold8226</i> | 21624                          | (G/A)       |
| 16122       | CakSNP16122    | <i>Kabuli</i>    | <i>Ca_Kabuli_Scaffold8226</i> | 21592                          | (T/G)       |
| 16123       | CakSNP16123    | <i>Kabuli</i>    | <i>Ca_Kabuli_Scaffold8226</i> | 21590                          | (T/C)       |
| 16124       | CakSNP16124    | <i>Kabuli</i>    | <i>Ca_Kabuli_Scaffold8226</i> | 21572                          | (T/A)       |
| 16125       | CakSNP16125    | <i>Kabuli</i>    | <i>Ca_Kabuli_Scaffold842</i>  | 13898                          | (T/C)       |
| 16126       | CakSNP16126    | <i>Kabuli</i>    | <i>Ca_Kabuli_Scaffold842</i>  | 13905                          | (C/G)       |
| 16127       | CakSNP16127    | <i>Kabuli</i>    | <i>Ca_Kabuli_Scaffold842</i>  | 13928                          | (G/T)       |
| 16128       | CakSNP16128    | <i>Kabuli</i>    | <i>Ca_Kabuli_Scaffold842</i>  | 13946                          | (T/C)       |
| 16129       | CakSNP16129    | <i>Kabuli</i>    | <i>Ca_Kabuli_Scaffold845</i>  | 28172                          | (G/T)       |
| 16130       | CakSNP16130    | <i>Kabuli</i>    | <i>Ca_Kabuli_Scaffold845</i>  | 45557                          | (A/G)       |
| 16131       | CakSNP16131    | <i>Kabuli</i>    | <i>Ca_Kabuli_Scaffold845</i>  | 71041                          | (A/G)       |
| 16132       | CakSNP16132    | <i>Kabuli</i>    | <i>Ca_Kabuli_Scaffold845</i>  | 102612                         | (A/G)       |
| 16133       | CakSNP16133    | <i>Kabuli</i>    | <i>Ca_Kabuli_Scaffold845</i>  | 129326                         | (C/G)       |
| 16134       | CakSNP16134    | <i>Kabuli</i>    | <i>Ca_Kabuli_Scaffold845</i>  | 129370                         | (A/G)       |
| 16135       | CakSNP16135    | <i>Kabuli</i>    | <i>Ca_Kabuli_Scaffold845</i>  | 130569                         | (G/C)       |
| 16136       | CakSNP16136    | <i>Kabuli</i>    | <i>Ca_Kabuli_Scaffold845</i>  | 131911                         | (A/G)       |
| 16137       | CakSNP16137    | <i>Kabuli</i>    | <i>Ca_Kabuli_Scaffold845</i>  | 136796                         | (A/G)       |
| 16138       | CakSNP16138    | <i>Kabuli</i>    | <i>Ca_Kabuli_Scaffold845</i>  | 139268                         | (G/A)       |
| 16139       | CakSNP16139    | <i>Kabuli</i>    | <i>Ca_Kabuli_Scaffold845</i>  | 154556                         | (T/C)       |
| 16140       | CakSNP16140    | <i>Kabuli</i>    | <i>Ca_Kabuli_Scaffold845</i>  | 205934                         | (T/C)       |
| 16141       | CakSNP16141    | <i>Kabuli</i>    | <i>Ca_Kabuli_Scaffold848</i>  | 37282                          | (G/A)       |
| 16142       | CakSNP16142    | <i>Kabuli</i>    | <i>Ca_Kabuli_Scaffold848</i>  | 37309                          | (G/A)       |
| 16143       | CakSNP16143    | <i>Kabuli</i>    | <i>Ca_Kabuli_Scaffold848</i>  | 39934                          | (T/G)       |
| 16144       | CakSNP16144    | <i>Kabuli</i>    | <i>Ca_Kabuli_Scaffold848</i>  | 39968                          | (C/T)       |

| <b>S.N.</b> | <b>SNP IDs</b> | <b>Cultivars</b> | <b>Chromosomes/scaffolds</b>  | <b>Physical positions (bp)</b> | <b>SNPs</b> |
|-------------|----------------|------------------|-------------------------------|--------------------------------|-------------|
| 16145       | CakSNP16145    | <i>Kabuli</i>    | <i>Ca_Kabuli_Scaffold848</i>  | 39984                          | (G/T)       |
| 16146       | CakSNP16146    | <i>Kabuli</i>    | <i>Ca_Kabuli_Scaffold848</i>  | 39985                          | (C/T)       |
| 16147       | CakSNP16147    | <i>Kabuli</i>    | <i>Ca_Kabuli_Scaffold848</i>  | 39990                          | (A/G)       |
| 16148       | CakSNP16148    | <i>Kabuli</i>    | <i>Ca_Kabuli_Scaffold848</i>  | 39994                          | (C/T)       |
| 16149       | CakSNP16149    | <i>Kabuli</i>    | <i>Ca_Kabuli_Scaffold848</i>  | 89976                          | (C/A)       |
| 16150       | CakSNP16150    | <i>Kabuli</i>    | <i>Ca_Kabuli_Scaffold848</i>  | 114078                         | (T/C)       |
| 16151       | CakSNP16151    | <i>Kabuli</i>    | <i>Ca_Kabuli_Scaffold848</i>  | 158548                         | (T/C)       |
| 16152       | CakSNP16152    | <i>Kabuli</i>    | <i>Ca_Kabuli_Scaffold848</i>  | 158557                         | (G/A)       |
| 16153       | CakSNP16153    | <i>Kabuli</i>    | <i>Ca_Kabuli_Scaffold848</i>  | 158569                         | (C/T)       |
| 16154       | CakSNP16154    | <i>Kabuli</i>    | <i>Ca_Kabuli_Scaffold848</i>  | 158570                         | (A/G)       |
| 16155       | CakSNP16155    | <i>Kabuli</i>    | <i>Ca_Kabuli_Scaffold848</i>  | 158611                         | (C/T)       |
| 16156       | CakSNP16156    | <i>Kabuli</i>    | <i>Ca_Kabuli_Scaffold848</i>  | 158638                         | (G/A)       |
| 16157       | CakSNP16157    | <i>Kabuli</i>    | <i>Ca_Kabuli_Scaffold848</i>  | 158626                         | (G/T)       |
| 16158       | CakSNP16158    | <i>Kabuli</i>    | <i>Ca_Kabuli_Scaffold848</i>  | 158594                         | (A/G)       |
| 16159       | CakSNP16159    | <i>Kabuli</i>    | <i>Ca_Kabuli_Scaffold857</i>  | 5227                           | (G/A)       |
| 16160       | CakSNP16160    | <i>Kabuli</i>    | <i>Ca_Kabuli_Scaffold8586</i> | 4415                           | (A/G)       |
| 16161       | CakSNP16161    | <i>Kabuli</i>    | <i>Ca_Kabuli_Scaffold859</i>  | 9382                           | (A/G)       |
| 16162       | CakSNP16162    | <i>Kabuli</i>    | <i>Ca_Kabuli_Scaffold8641</i> | 502                            | (G/A)       |
| 16163       | CakSNP16163    | <i>Kabuli</i>    | <i>Ca_Kabuli_Scaffold8641</i> | 472                            | (C/T)       |
| 16164       | CakSNP16164    | <i>Kabuli</i>    | <i>Ca_Kabuli_Scaffold8641</i> | 466                            | (C/T)       |
| 16165       | CakSNP16165    | <i>Kabuli</i>    | <i>Ca_Kabuli_Scaffold8641</i> | 460                            | (T/C)       |
| 16166       | CakSNP16166    | <i>Kabuli</i>    | <i>Ca_Kabuli_Scaffold8646</i> | 2056                           | (A/T)       |
| 16167       | CakSNP16167    | <i>Kabuli</i>    | <i>Ca_Kabuli_Scaffold8646</i> | 2073                           | (G/A)       |
| 16168       | CakSNP16168    | <i>Kabuli</i>    | <i>Ca_Kabuli_Scaffold8648</i> | 3938                           | (C/T)       |
| 16169       | CakSNP16169    | <i>Kabuli</i>    | <i>Ca_Kabuli_Scaffold8648</i> | 3977                           | (A/G)       |
| 16170       | CakSNP16170    | <i>Kabuli</i>    | <i>Ca_Kabuli_Scaffold8648</i> | 4058                           | (C/A)       |
| 16171       | CakSNP16171    | <i>Kabuli</i>    | <i>Ca_Kabuli_Scaffold8648</i> | 4050                           | (A/G)       |
| 16172       | CakSNP16172    | <i>Kabuli</i>    | <i>Ca_Kabuli_Scaffold8648</i> | 4036                           | (A/C)       |
| 16173       | CakSNP16173    | <i>Kabuli</i>    | <i>Ca_Kabuli_Scaffold8648</i> | 4013                           | (G/A)       |
| 16174       | CakSNP16174    | <i>Kabuli</i>    | <i>Ca_Kabuli_Scaffold8648</i> | 3992                           | (G/A)       |
| 16175       | CakSNP16175    | <i>Kabuli</i>    | <i>Ca_Kabuli_Scaffold866</i>  | 27325                          | (C/T)       |
| 16176       | CakSNP16176    | <i>Kabuli</i>    | <i>Ca_Kabuli_Scaffold866</i>  | 27293                          | (T/G)       |
| 16177       | CakSNP16177    | <i>Kabuli</i>    | <i>Ca_Kabuli_Scaffold866</i>  | 27279                          | (C/T)       |
| 16178       | CakSNP16178    | <i>Kabuli</i>    | <i>Ca_Kabuli_Scaffold87</i>   | 182677                         | (C/G)       |
| 16179       | CakSNP16179    | <i>Kabuli</i>    | <i>Ca_Kabuli_Scaffold87</i>   | 182724                         | (G/A)       |
| 16180       | CakSNP16180    | <i>Kabuli</i>    | <i>Ca_Kabuli_Scaffold87</i>   | 182769                         | (G/C)       |
| 16181       | CakSNP16181    | <i>Kabuli</i>    | <i>Ca_Kabuli_Scaffold87</i>   | 182788                         | (A/C)       |
| 16182       | CakSNP16182    | <i>Kabuli</i>    | <i>Ca_Kabuli_Scaffold873</i>  | 265386                         | (C/T)       |
| 16183       | CakSNP16183    | <i>Kabuli</i>    | <i>Ca_Kabuli_Scaffold873</i>  | 265395                         | (C/A)       |



| <b>S.N.</b> | <b>SNP IDs</b> | <b>Cultivars</b> | <b>Chromosomes/scaffolds</b>   | <b>Physical positions (bp)</b> | <b>SNPs</b> |
|-------------|----------------|------------------|--------------------------------|--------------------------------|-------------|
| 16184       | CakSNP16184    | <i>Kabuli</i>    | <i>Ca_Kabuli_Scaffold873</i>   | 265396                         | (C/T)       |
| 16185       | CakSNP16185    | <i>Kabuli</i>    | <i>Ca_Kabuli_Scaffold873</i>   | 265399                         | (C/A)       |
| 16186       | CakSNP16186    | <i>Kabuli</i>    | <i>Ca_Kabuli_Scaffold873</i>   | 265458                         | (C/T)       |
| 16187       | CakSNP16187    | <i>Kabuli</i>    | <i>Ca_Kabuli_Scaffold873</i>   | 265406                         | (T/C)       |
| 16188       | CakSNP16188    | <i>Kabuli</i>    | <i>Ca_Kabuli_Scaffold875</i>   | 49179                          | (T/C)       |
| 16189       | CakSNP16189    | <i>Kabuli</i>    | <i>Ca_Kabuli_Scaffold875</i>   | 51703                          | (C/G)       |
| 16190       | CakSNP16190    | <i>Kabuli</i>    | <i>Ca_Kabuli_Scaffold875</i>   | 51702                          | (T/A)       |
| 16191       | CakSNP16191    | <i>Kabuli</i>    | <i>Ca_Kabuli_Scaffold875</i>   | 51701                          | (T/C)       |
| 16192       | CakSNP16192    | <i>Kabuli</i>    | <i>Ca_Kabuli_Scaffold875</i>   | 51714                          | (T/A)       |
| 16193       | CakSNP16193    | <i>Kabuli</i>    | <i>Ca_Kabuli_Scaffold875</i>   | 51704                          | (C/A)       |
| 16194       | CakSNP16194    | <i>Kabuli</i>    | <i>Ca_Kabuli_Scaffold875</i>   | 62738                          | (A/G)       |
| 16195       | CakSNP16195    | <i>Kabuli</i>    | <i>Ca_Kabuli_Scaffold876</i>   | 152311                         | (G/T)       |
| 16196       | CakSNP16196    | <i>Kabuli</i>    | <i>Ca_Kabuli_Scaffold876</i>   | 188605                         | (C/G)       |
| 16197       | CakSNP16197    | <i>Kabuli</i>    | <i>Ca_Kabuli_Scaffold876</i>   | 297059                         | (T/C)       |
| 16198       | CakSNP16198    | <i>Kabuli</i>    | <i>Ca_Kabuli_Scaffold876</i>   | 297024                         | (T/G)       |
| 16199       | CakSNP16199    | <i>Kabuli</i>    | <i>Ca_Kabuli_Scaffold876</i>   | 297023                         | (G/A)       |
| 16200       | CakSNP16200    | <i>Kabuli</i>    | <i>Ca_Kabuli_Scaffold876</i>   | 297022                         | (G/A)       |
| 16201       | CakSNP16201    | <i>Kabuli</i>    | <i>Ca_Kabuli_Scaffold876</i>   | 297003                         | (C/T)       |
| 16202       | CakSNP16202    | <i>Kabuli</i>    | <i>Ca_Kabuli_Scaffold876</i>   | 296995                         | (C/T)       |
| 16203       | CakSNP16203    | <i>Kabuli</i>    | <i>Ca_Kabuli_Scaffold877</i>   | 9813                           | (G/A)       |
| 16204       | CakSNP16204    | <i>Kabuli</i>    | <i>Ca_Kabuli_Scaffold877</i>   | 9851                           | (C/T)       |
| 16205       | CakSNP16205    | <i>Kabuli</i>    | <i>Ca_Kabuli_Scaffold88</i>    | 9982                           | (C/A)       |
| 16206       | CakSNP16206    | <i>Kabuli</i>    | <i>Ca_Kabuli_Scaffold88</i>    | 16398                          | (C/T)       |
| 16207       | CakSNP16207    | <i>Kabuli</i>    | <i>Ca_Kabuli_Scaffold88</i>    | 110743                         | (A/G)       |
| 16208       | CakSNP16208    | <i>Kabuli</i>    | <i>Ca_Kabuli_Scaffold88</i>    | 240551                         | (T/C)       |
| 16209       | CakSNP16209    | <i>Kabuli</i>    | <i>Ca_Kabuli_Scaffold88</i>    | 240550                         | (G/A)       |
| 16210       | CakSNP16210    | <i>Kabuli</i>    | <i>Ca_Kabuli_Scaffold88</i>    | 240525                         | (A/G)       |
| 16211       | CakSNP16211    | <i>Kabuli</i>    | <i>Ca_Kabuli_Scaffold88</i>    | 274006                         | (A/G)       |
| 16212       | CakSNP16212    | <i>Kabuli</i>    | <i>Ca_Kabuli_Scaffold882</i>   | 117376                         | (G/A)       |
| 16213       | CakSNP16213    | <i>Kabuli</i>    | <i>Ca_Kabuli_Scaffold882</i>   | 118266                         | (G/T)       |
| 16214       | CakSNP16214    | <i>Kabuli</i>    | <i>Ca_Kabuli_Scaffold882</i>   | 232549                         | (C/A)       |
| 16215       | CakSNP16215    | <i>Kabuli</i>    | <i>Ca_Kabuli_Scaffold882</i>   | 232570                         | (T/G)       |
| 16216       | CakSNP16216    | <i>Kabuli</i>    | <i>Ca_Kabuli_Scaffold882</i>   | 232605                         | (T/A)       |
| 16217       | CakSNP16217    | <i>Kabuli</i>    | <i>Ca_Kabuli_Scaffold882</i>   | 358449                         | (T/A)       |
| 16218       | CakSNP16218    | <i>Kabuli</i>    | <i>Ca_Kabuli_Scaffold882</i>   | 570871                         | (T/A)       |
| 16219       | CakSNP16219    | <i>Kabuli</i>    | <i>Ca_Kabuli_Scaffold882</i>   | 571210                         | (A/T)       |
| 16220       | CakSNP16220    | <i>Kabuli</i>    | <i>Ca_Kabuli_Scaffold882</i>   | 573367                         | (T/A)       |
| 16221       | CakSNP16221    | <i>Kabuli</i>    | <i>Ca_Kabuli_Scaffold882</i>   | 573706                         | (A/T)       |
| 16222       | CakSNP16222    | <i>Kabuli</i>    | <i>Ca_Kabuli_Scaffold887_1</i> | 26025                          | (A/C)       |

| <b>S.N.</b> | <b>SNP IDs</b> | <b>Cultivars</b> | <b>Chromosomes/scaffolds</b>   | <b>Physical positions (bp)</b> | <b>SNPs</b> |
|-------------|----------------|------------------|--------------------------------|--------------------------------|-------------|
| 16223       | CakSNP16223    | <i>Kabuli</i>    | <i>Ca_Kabuli_Scaffold887_1</i> | 26134                          | (C/A)       |
| 16224       | CakSNP16224    | <i>Kabuli</i>    | <i>Ca_Kabuli_Scaffold887_1</i> | 26121                          | (A/C)       |
| 16225       | CakSNP16225    | <i>Kabuli</i>    | <i>Ca_Kabuli_Scaffold887_1</i> | 26108                          | (G/T)       |
| 16226       | CakSNP16226    | <i>Kabuli</i>    | <i>Ca_Kabuli_Scaffold887_1</i> | 139386                         | (T/C)       |
| 16227       | CakSNP16227    | <i>Kabuli</i>    | <i>Ca_Kabuli_Scaffold887_1</i> | 139396                         | (G/C)       |
| 16228       | CakSNP16228    | <i>Kabuli</i>    | <i>Ca_Kabuli_Scaffold887_1</i> | 139580                         | (G/T)       |
| 16229       | CakSNP16229    | <i>Kabuli</i>    | <i>Ca_Kabuli_Scaffold887_1</i> | 144885                         | (T/C)       |
| 16230       | CakSNP16230    | <i>Kabuli</i>    | <i>Ca_Kabuli_Scaffold887_1</i> | 260488                         | (A/C)       |
| 16231       | CakSNP16231    | <i>Kabuli</i>    | <i>Ca_Kabuli_Scaffold892</i>   | 24349                          | (T/C)       |
| 16232       | CakSNP16232    | <i>Kabuli</i>    | <i>Ca_Kabuli_Scaffold892</i>   | 24323                          | (A/G)       |
| 16233       | CakSNP16233    | <i>Kabuli</i>    | <i>Ca_Kabuli_Scaffold892</i>   | 24317                          | (G/T)       |
| 16234       | CakSNP16234    | <i>Kabuli</i>    | <i>Ca_Kabuli_Scaffold892</i>   | 24316                          | (T/A)       |
| 16235       | CakSNP16235    | <i>Kabuli</i>    | <i>Ca_Kabuli_Scaffold892</i>   | 35527                          | (T/C)       |
| 16236       | CakSNP16236    | <i>Kabuli</i>    | <i>Ca_Kabuli_Scaffold892</i>   | 35501                          | (A/G)       |
| 16237       | CakSNP16237    | <i>Kabuli</i>    | <i>Ca_Kabuli_Scaffold892</i>   | 35495                          | (G/T)       |
| 16238       | CakSNP16238    | <i>Kabuli</i>    | <i>Ca_Kabuli_Scaffold892</i>   | 35494                          | (T/A)       |
| 16239       | CakSNP16239    | <i>Kabuli</i>    | <i>Ca_Kabuli_Scaffold892</i>   | 35489                          | (A/G)       |
| 16240       | CakSNP16240    | <i>Kabuli</i>    | <i>Ca_Kabuli_Scaffold892</i>   | 35514                          | (G/T)       |
| 16241       | CakSNP16241    | <i>Kabuli</i>    | <i>Ca_Kabuli_Scaffold895</i>   | 18621                          | (C/A)       |
| 16242       | CakSNP16242    | <i>Kabuli</i>    | <i>Ca_Kabuli_Scaffold895</i>   | 18693                          | (G/C)       |
| 16243       | CakSNP16243    | <i>Kabuli</i>    | <i>Ca_Kabuli_Scaffold895</i>   | 20978                          | (T/C)       |
| 16244       | CakSNP16244    | <i>Kabuli</i>    | <i>Ca_Kabuli_Scaffold895</i>   | 158250                         | (A/G)       |
| 16245       | CakSNP16245    | <i>Kabuli</i>    | <i>Ca_Kabuli_Scaffold901</i>   | 91817                          | (C/T)       |
| 16246       | CakSNP16246    | <i>Kabuli</i>    | <i>Ca_Kabuli_Scaffold901</i>   | 91849                          | (T/C)       |
| 16247       | CakSNP16247    | <i>Kabuli</i>    | <i>Ca_Kabuli_Scaffold908</i>   | 15845                          | (C/A)       |
| 16248       | CakSNP16248    | <i>Kabuli</i>    | <i>Ca_Kabuli_Scaffold908</i>   | 15841                          | (G/A)       |
| 16249       | CakSNP16249    | <i>Kabuli</i>    | <i>Ca_Kabuli_Scaffold908</i>   | 15840                          | (G/A)       |
| 16250       | CakSNP16250    | <i>Kabuli</i>    | <i>Ca_Kabuli_Scaffold908</i>   | 15816                          | (C/T)       |
| 16251       | CakSNP16251    | <i>Kabuli</i>    | <i>Ca_Kabuli_Scaffold908</i>   | 15813                          | (G/T)       |
| 16252       | CakSNP16252    | <i>Kabuli</i>    | <i>Ca_Kabuli_Scaffold908</i>   | 15810                          | (A/G)       |
| 16253       | CakSNP16253    | <i>Kabuli</i>    | <i>Ca_Kabuli_Scaffold908</i>   | 15799                          | (C/T)       |
| 16254       | CakSNP16254    | <i>Kabuli</i>    | <i>Ca_Kabuli_Scaffold908</i>   | 15786                          | (G/A)       |
| 16255       | CakSNP16255    | <i>Kabuli</i>    | <i>Ca_Kabuli_Scaffold908</i>   | 15785                          | (G/A)       |
| 16256       | CakSNP16256    | <i>Kabuli</i>    | <i>Ca_Kabuli_Scaffold908</i>   | 15822                          | (C/T)       |
| 16257       | CakSNP16257    | <i>Kabuli</i>    | <i>Ca_Kabuli_Scaffold908</i>   | 15834                          | (C/A)       |
| 16258       | CakSNP16258    | <i>Kabuli</i>    | <i>Ca_Kabuli_Scaffold913</i>   | 14282                          | (A/C)       |
| 16259       | CakSNP16259    | <i>Kabuli</i>    | <i>Ca_Kabuli_Scaffold913</i>   | 332494                         | (G/C)       |
| 16260       | CakSNP16260    | <i>Kabuli</i>    | <i>Ca_Kabuli_Scaffold913</i>   | 403513                         | (G/A)       |
| 16261       | CakSNP16261    | <i>Kabuli</i>    | <i>Ca_Kabuli_Scaffold913</i>   | 403572                         | (C/G)       |

| <b>S.N.</b> | <b>SNP IDs</b> | <b>Cultivars</b> | <b>Chromosomes/scaffolds</b> | <b>Physical positions (bp)</b> | <b>SNPs</b> |
|-------------|----------------|------------------|------------------------------|--------------------------------|-------------|
| 16262       | CakSNP16262    | <i>Kabuli</i>    | <i>Ca_Kabuli_Scaffold913</i> | 403553                         | (T/C)       |
| 16263       | CakSNP16263    | <i>Kabuli</i>    | <i>Ca_Kabuli_Scaffold913</i> | 403531                         | (A/C)       |
| 16264       | CakSNP16264    | <i>Kabuli</i>    | <i>Ca_Kabuli_Scaffold914</i> | 18826                          | (A/G)       |
| 16265       | CakSNP16265    | <i>Kabuli</i>    | <i>Ca_Kabuli_Scaffold914</i> | 18810                          | (C/A)       |
| 16266       | CakSNP16266    | <i>Kabuli</i>    | <i>Ca_Kabuli_Scaffold914</i> | 18809                          | (C/T)       |
| 16267       | CakSNP16267    | <i>Kabuli</i>    | <i>Ca_Kabuli_Scaffold914</i> | 18750                          | (C/A)       |
| 16268       | CakSNP16268    | <i>Kabuli</i>    | <i>Ca_Kabuli_Scaffold914</i> | 38792                          | (A/G)       |
| 16269       | CakSNP16269    | <i>Kabuli</i>    | <i>Ca_Kabuli_Scaffold914</i> | 38776                          | (C/A)       |
| 16270       | CakSNP16270    | <i>Kabuli</i>    | <i>Ca_Kabuli_Scaffold914</i> | 38775                          | (C/T)       |
| 16271       | CakSNP16271    | <i>Kabuli</i>    | <i>Ca_Kabuli_Scaffold914</i> | 38716                          | (C/A)       |
| 16272       | CakSNP16272    | <i>Kabuli</i>    | <i>Ca_Kabuli_Scaffold914</i> | 53125                          | (T/A)       |
| 16273       | CakSNP16273    | <i>Kabuli</i>    | <i>Ca_Kabuli_Scaffold914</i> | 53132                          | (C/T)       |
| 16274       | CakSNP16274    | <i>Kabuli</i>    | <i>Ca_Kabuli_Scaffold914</i> | 53270                          | (A/G)       |
| 16275       | CakSNP16275    | <i>Kabuli</i>    | <i>Ca_Kabuli_Scaffold916</i> | 1036                           | (A/G)       |
| 16276       | CakSNP16276    | <i>Kabuli</i>    | <i>Ca_Kabuli_Scaffold916</i> | 275497                         | (T/C)       |
| 16277       | CakSNP16277    | <i>Kabuli</i>    | <i>Ca_Kabuli_Scaffold916</i> | 275510                         | (A/T)       |
| 16278       | CakSNP16278    | <i>Kabuli</i>    | <i>Ca_Kabuli_Scaffold916</i> | 275512                         | (G/T)       |
| 16279       | CakSNP16279    | <i>Kabuli</i>    | <i>Ca_Kabuli_Scaffold916</i> | 275519                         | (A/C)       |
| 16280       | CakSNP16280    | <i>Kabuli</i>    | <i>Ca_Kabuli_Scaffold916</i> | 275493                         | (A/T)       |
| 16281       | CakSNP16281    | <i>Kabuli</i>    | <i>Ca_Kabuli_Scaffold919</i> | 119274                         | (T/C)       |
| 16282       | CakSNP16282    | <i>Kabuli</i>    | <i>Ca_Kabuli_Scaffold922</i> | 111921                         | (C/A)       |
| 16283       | CakSNP16283    | <i>Kabuli</i>    | <i>Ca_Kabuli_Scaffold922</i> | 121629                         | (T/C)       |
| 16284       | CakSNP16284    | <i>Kabuli</i>    | <i>Ca_Kabuli_Scaffold93</i>  | 205677                         | (G/A)       |
| 16285       | CakSNP16285    | <i>Kabuli</i>    | <i>Ca_Kabuli_Scaffold93</i>  | 506983                         | (C/A)       |
| 16286       | CakSNP16286    | <i>Kabuli</i>    | <i>Ca_Kabuli_Scaffold93</i>  | 578138                         | (G/A)       |
| 16287       | CakSNP16287    | <i>Kabuli</i>    | <i>Ca_Kabuli_Scaffold93</i>  | 578146                         | (A/G)       |
| 16288       | CakSNP16288    | <i>Kabuli</i>    | <i>Ca_Kabuli_Scaffold93</i>  | 578158                         | (A/G)       |
| 16289       | CakSNP16289    | <i>Kabuli</i>    | <i>Ca_Kabuli_Scaffold93</i>  | 640373                         | (A/C)       |
| 16290       | CakSNP16290    | <i>Kabuli</i>    | <i>Ca_Kabuli_Scaffold93</i>  | 640389                         | (G/T)       |
| 16291       | CakSNP16291    | <i>Kabuli</i>    | <i>Ca_Kabuli_Scaffold93</i>  | 640430                         | (C/T)       |
| 16292       | CakSNP16292    | <i>Kabuli</i>    | <i>Ca_Kabuli_Scaffold93</i>  | 640487                         | (A/C)       |
| 16293       | CakSNP16293    | <i>Kabuli</i>    | <i>Ca_Kabuli_Scaffold93</i>  | 640459                         | (G/T)       |
| 16294       | CakSNP16294    | <i>Kabuli</i>    | <i>Ca_Kabuli_Scaffold93</i>  | 640448                         | (T/C)       |
| 16295       | CakSNP16295    | <i>Kabuli</i>    | <i>Ca_Kabuli_Scaffold93</i>  | 640445                         | (C/T)       |
| 16296       | CakSNP16296    | <i>Kabuli</i>    | <i>Ca_Kabuli_Scaffold93</i>  | 640444                         | (G/T)       |
| 16297       | CakSNP16297    | <i>Kabuli</i>    | <i>Ca_Kabuli_Scaffold93</i>  | 645328                         | (A/C)       |
| 16298       | CakSNP16298    | <i>Kabuli</i>    | <i>Ca_Kabuli_Scaffold93</i>  | 645344                         | (G/T)       |
| 16299       | CakSNP16299    | <i>Kabuli</i>    | <i>Ca_Kabuli_Scaffold93</i>  | 645442                         | (A/C)       |
| 16300       | CakSNP16300    | <i>Kabuli</i>    | <i>Ca_Kabuli_Scaffold93</i>  | 645414                         | (G/T)       |

| <b>S.N.</b> | <b>SNP IDs</b> | <b>Cultivars</b> | <b>Chromosomes/scaffolds</b>  | <b>Physical positions (bp)</b> | <b>SNPs</b> |
|-------------|----------------|------------------|-------------------------------|--------------------------------|-------------|
| 16301       | CakSNP16301    | <i>Kabuli</i>    | <i>Ca_Kabuli_Scaffold93</i>   | 645403                         | (T/C)       |
| 16302       | CakSNP16302    | <i>Kabuli</i>    | <i>Ca_Kabuli_Scaffold93</i>   | 645400                         | (C/T)       |
| 16303       | CakSNP16303    | <i>Kabuli</i>    | <i>Ca_Kabuli_Scaffold93</i>   | 645399                         | (G/T)       |
| 16304       | CakSNP16304    | <i>Kabuli</i>    | <i>Ca_Kabuli_Scaffold93</i>   | 645402                         | (G/A)       |
| 16305       | CakSNP16305    | <i>Kabuli</i>    | <i>Ca_Kabuli_Scaffold93</i>   | 651020                         | (C/T)       |
| 16306       | CakSNP16306    | <i>Kabuli</i>    | <i>Ca_Kabuli_Scaffold93</i>   | 651018                         | (C/T)       |
| 16307       | CakSNP16307    | <i>Kabuli</i>    | <i>Ca_Kabuli_Scaffold93</i>   | 651009                         | (A/G)       |
| 16308       | CakSNP16308    | <i>Kabuli</i>    | <i>Ca_Kabuli_Scaffold93</i>   | 650981                         | (T/C)       |
| 16309       | CakSNP16309    | <i>Kabuli</i>    | <i>Ca_Kabuli_Scaffold93</i>   | 650968                         | (G/A)       |
| 16310       | CakSNP16310    | <i>Kabuli</i>    | <i>Ca_Kabuli_Scaffold93</i>   | 650958                         | (G/A)       |
| 16311       | CakSNP16311    | <i>Kabuli</i>    | <i>Ca_Kabuli_Scaffold93</i>   | 650955                         | (T/C)       |
| 16312       | CakSNP16312    | <i>Kabuli</i>    | <i>Ca_Kabuli_Scaffold931</i>  | 13212                          | (T/C)       |
| 16313       | CakSNP16313    | <i>Kabuli</i>    | <i>Ca_Kabuli_Scaffold9323</i> | 5263                           | (A/G)       |
| 16314       | CakSNP16314    | <i>Kabuli</i>    | <i>Ca_Kabuli_Scaffold937</i>  | 132087                         | (C/G)       |
| 16315       | CakSNP16315    | <i>Kabuli</i>    | <i>Ca_Kabuli_Scaffold937</i>  | 134580                         | (C/G)       |
| 16316       | CakSNP16316    | <i>Kabuli</i>    | <i>Ca_Kabuli_Scaffold937</i>  | 134707                         | (G/A)       |
| 16317       | CakSNP16317    | <i>Kabuli</i>    | <i>Ca_Kabuli_Scaffold948</i>  | 12188                          | (C/T)       |
| 16318       | CakSNP16318    | <i>Kabuli</i>    | <i>Ca_Kabuli_Scaffold948</i>  | 21152                          | (C/T)       |
| 16319       | CakSNP16319    | <i>Kabuli</i>    | <i>Ca_Kabuli_Scaffold953</i>  | 42329                          | (T/C)       |
| 16320       | CakSNP16320    | <i>Kabuli</i>    | <i>Ca_Kabuli_Scaffold953</i>  | 57413                          | (A/T)       |
| 16321       | CakSNP16321    | <i>Kabuli</i>    | <i>Ca_Kabuli_Scaffold956</i>  | 21441                          | (C/A)       |
| 16322       | CakSNP16322    | <i>Kabuli</i>    | <i>Ca_Kabuli_Scaffold956</i>  | 27612                          | (A/G)       |
| 16323       | CakSNP16323    | <i>Kabuli</i>    | <i>Ca_Kabuli_Scaffold956</i>  | 27710                          | (T/G)       |
| 16324       | CakSNP16324    | <i>Kabuli</i>    | <i>Ca_Kabuli_Scaffold956</i>  | 27693                          | (T/C)       |
| 16325       | CakSNP16325    | <i>Kabuli</i>    | <i>Ca_Kabuli_Scaffold956</i>  | 28015                          | (A/C)       |
| 16326       | CakSNP16326    | <i>Kabuli</i>    | <i>Ca_Kabuli_Scaffold956</i>  | 28014                          | (T/A)       |
| 16327       | CakSNP16327    | <i>Kabuli</i>    | <i>Ca_Kabuli_Scaffold956</i>  | 29736                          | (T/A)       |
| 16328       | CakSNP16328    | <i>Kabuli</i>    | <i>Ca_Kabuli_Scaffold959</i>  | 56173                          | (C/T)       |
| 16329       | CakSNP16329    | <i>Kabuli</i>    | <i>Ca_Kabuli_Scaffold959</i>  | 56159                          | (G/A)       |
| 16330       | CakSNP16330    | <i>Kabuli</i>    | <i>Ca_Kabuli_Scaffold959</i>  | 56156                          | (G/A)       |
| 16331       | CakSNP16331    | <i>Kabuli</i>    | <i>Ca_Kabuli_Scaffold959</i>  | 56117                          | (G/A)       |
| 16332       | CakSNP16332    | <i>Kabuli</i>    | <i>Ca_Kabuli_Scaffold962</i>  | 149524                         | (C/T)       |
| 16333       | CakSNP16333    | <i>Kabuli</i>    | <i>Ca_Kabuli_Scaffold962</i>  | 149545                         | (C/T)       |
| 16334       | CakSNP16334    | <i>Kabuli</i>    | <i>Ca_Kabuli_Scaffold962</i>  | 149580                         | (G/A)       |
| 16335       | CakSNP16335    | <i>Kabuli</i>    | <i>Ca_Kabuli_Scaffold962</i>  | 149585                         | (A/G)       |
| 16336       | CakSNP16336    | <i>Kabuli</i>    | <i>Ca_Kabuli_Scaffold962</i>  | 149645                         | (G/T)       |
| 16337       | CakSNP16337    | <i>Kabuli</i>    | <i>Ca_Kabuli_Scaffold962</i>  | 149631                         | (G/A)       |
| 16338       | CakSNP16338    | <i>Kabuli</i>    | <i>Ca_Kabuli_Scaffold962</i>  | 149589                         | (G/A)       |
| 16339       | CakSNP16339    | <i>Kabuli</i>    | <i>Ca_Kabuli_Scaffold962</i>  | 149583                         | (G/A)       |

| <b>S.N.</b> | <b>SNP IDs</b> | <b>Cultivars</b> | <b>Chromosomes/scaffolds</b> | <b>Physical positions (bp)</b> | <b>SNPs</b> |
|-------------|----------------|------------------|------------------------------|--------------------------------|-------------|
| 16340       | CakSNP16340    | <i>Kabuli</i>    | <i>Ca_Kabuli_Scaffold962</i> | 149577                         | (G/T)       |
| 16341       | CakSNP16341    | <i>Kabuli</i>    | <i>Ca_Kabuli_Scaffold962</i> | 149689                         | (G/A)       |
| 16342       | CakSNP16342    | <i>Kabuli</i>    | <i>Ca_Kabuli_Scaffold962</i> | 149687                         | (A/T)       |
| 16343       | CakSNP16343    | <i>Kabuli</i>    | <i>Ca_Kabuli_Scaffold962</i> | 149676                         | (T/C)       |
| 16344       | CakSNP16344    | <i>Kabuli</i>    | <i>Ca_Kabuli_Scaffold962</i> | 149661                         | (G/A)       |
| 16345       | CakSNP16345    | <i>Kabuli</i>    | <i>Ca_Kabuli_Scaffold962</i> | 149649                         | (C/T)       |
| 16346       | CakSNP16346    | <i>Kabuli</i>    | <i>Ca_Kabuli_Scaffold962</i> | 149644                         | (C/T)       |
| 16347       | CakSNP16347    | <i>Kabuli</i>    | <i>Ca_Kabuli_Scaffold962</i> | 149628                         | (G/A)       |
| 16348       | CakSNP16348    | <i>Kabuli</i>    | <i>Ca_Kabuli_Scaffold962</i> | 149613                         | (G/T)       |
| 16349       | CakSNP16349    | <i>Kabuli</i>    | <i>Ca_Kabuli_Scaffold963</i> | 77099                          | (C/T)       |
| 16350       | CakSNP16350    | <i>Kabuli</i>    | <i>Ca_Kabuli_Scaffold98</i>  | 287956                         | (T/A)       |
| 16351       | CakSNP16351    | <i>Kabuli</i>    | <i>Ca_Kabuli_Scaffold98</i>  | 287933                         | (T/C)       |
| 16352       | CakSNP16352    | <i>Kabuli</i>    | <i>Ca_Kabuli_Scaffold98</i>  | 388565                         | (T/C)       |
| 16353       | CakSNP16353    | <i>Kabuli</i>    | <i>Ca_Kabuli_Scaffold98</i>  | 434956                         | (A/G)       |
| 16354       | CakSNP16354    | <i>Kabuli</i>    | <i>Ca_Kabuli_Scaffold98</i>  | 440243                         | (G/C)       |
| 16355       | CakSNP16355    | <i>Kabuli</i>    | <i>Ca_Kabuli_Scaffold98</i>  | 447314                         | (G/C)       |
| 16356       | CakSNP16356    | <i>Kabuli</i>    | <i>Ca_Kabuli_Scaffold98</i>  | 447311                         | (G/A)       |
| 16357       | CakSNP16357    | <i>Kabuli</i>    | <i>Ca_Kabuli_Scaffold98</i>  | 485305                         | (G/C)       |
| 16358       | CakSNP16358    | <i>Kabuli</i>    | <i>Ca_Kabuli_Scaffold98</i>  | 485302                         | (G/A)       |
| 16359       | CakSNP16359    | <i>Kabuli</i>    | <i>Ca_Kabuli_Scaffold98</i>  | 533710                         | (T/C)       |
| 16360       | CakSNP16360    | <i>Kabuli</i>    | <i>Ca_Kabuli_Scaffold98</i>  | 533677                         | (T/A)       |
| 16361       | CakSNP16361    | <i>Kabuli</i>    | <i>Ca_Kabuli_Scaffold98</i>  | 533812                         | (G/C)       |
| 16362       | CakSNP16362    | <i>Kabuli</i>    | <i>Ca_Kabuli_Scaffold98</i>  | 562979                         | (G/A)       |
| 16363       | CakSNP16363    | <i>Kabuli</i>    | <i>Ca_Kabuli_Scaffold98</i>  | 563016                         | (T/C)       |
| 16364       | CakSNP16364    | <i>Kabuli</i>    | <i>Ca_Kabuli_Scaffold98</i>  | 563048                         | (A/C)       |
| 16365       | CakSNP16365    | <i>Kabuli</i>    | <i>Ca_Kabuli_Scaffold981</i> | 84091                          | (G/A)       |
| 16366       | CakSNP16366    | <i>Kabuli</i>    | <i>Ca_Kabuli_Scaffold981</i> | 84088                          | (C/G)       |
| 16367       | CakSNP16367    | <i>Kabuli</i>    | <i>Ca_Kabuli_Scaffold981</i> | 84087                          | (C/A)       |
| 16368       | CakSNP16368    | <i>Kabuli</i>    | <i>Ca_Kabuli_Scaffold981</i> | 84072                          | (G/A)       |
| 16369       | CakSNP16369    | <i>Kabuli</i>    | <i>Ca_Kabuli_Scaffold981</i> | 84057                          | (A/G)       |
| 16370       | CakSNP16370    | <i>Kabuli</i>    | <i>Ca_Kabuli_Scaffold981</i> | 84034                          | (C/T)       |
| 16371       | CakSNP16371    | <i>Kabuli</i>    | <i>Ca_Kabuli_Scaffold981</i> | 84026                          | (G/C)       |
| 16372       | CakSNP16372    | <i>Kabuli</i>    | <i>Ca_Kabuli_Scaffold981</i> | 84019                          | (C/T)       |
| 16373       | CakSNP16373    | <i>Kabuli</i>    | <i>Ca_Kabuli_Scaffold981</i> | 84007                          | (C/G)       |
| 16374       | CakSNP16374    | <i>Kabuli</i>    | <i>Ca_Kabuli_Scaffold999</i> | 77761                          | (A/T)       |
| 16375       | CakSNP16375    | <i>Kabuli</i>    | <i>Ca_Kabuli_Scaffold999</i> | 77763                          | (C/T)       |
| 16376       | CakSNP16376    | <i>Kabuli</i>    | <i>Ca_Kabuli_Scaffold999</i> | 77767                          | (A/T)       |
| 16377       | CakSNP16377    | <i>Kabuli</i>    | <i>Ca_Kabuli_denovo</i>      | 1061                           | (T/A)       |
| 16378       | CakSNP16378    | <i>Kabuli</i>    | <i>Ca_Kabuli_denovo</i>      | 1965                           | (G/T)       |

| <b>S.N.</b> | <b>SNP IDs</b> | <b>Cultivars</b> | <b>Chromosomes/scaffolds</b> | <b>Physical positions (bp)</b> | <b>SNPs</b> |
|-------------|----------------|------------------|------------------------------|--------------------------------|-------------|
| 16379       | CakSNP16379    | <i>Kabuli</i>    | <i>Ca_Kabuli_denovo</i>      | 1975                           | (G/A)       |
| 16380       | CakSNP16380    | <i>Kabuli</i>    | <i>Ca_Kabuli_denovo</i>      | 2003                           | (A/G)       |
| 16381       | CakSNP16381    | <i>Kabuli</i>    | <i>Ca_Kabuli_denovo</i>      | 2012                           | (T/G)       |
| 16382       | CakSNP16382    | <i>Kabuli</i>    | <i>Ca_Kabuli_denovo</i>      | 2047                           | (T/G)       |
| 16383       | CakSNP16383    | <i>Kabuli</i>    | <i>Ca_Kabuli_denovo</i>      | 3355                           | (C/A)       |
| 16384       | CakSNP16384    | <i>Kabuli</i>    | <i>Ca_Kabuli_denovo</i>      | 3357                           | (T/G)       |
| 16385       | CakSNP16385    | <i>Kabuli</i>    | <i>Ca_Kabuli_denovo</i>      | 3369                           | (C/G)       |
| 16386       | CakSNP16386    | <i>Kabuli</i>    | <i>Ca_Kabuli_denovo</i>      | 3376                           | (C/G)       |
| 16387       | CakSNP16387    | <i>Kabuli</i>    | <i>Ca_Kabuli_denovo</i>      | 3391                           | (A/G)       |
| 16388       | CakSNP16388    | <i>Kabuli</i>    | <i>Ca_Kabuli_denovo</i>      | 3398                           | (A/G)       |
| 16389       | CakSNP16389    | <i>Kabuli</i>    | <i>Ca_Kabuli_denovo</i>      | 3408                           | (C/G)       |
| 16390       | CakSNP16390    | <i>Kabuli</i>    | <i>Ca_Kabuli_denovo</i>      | 3410                           | (G/T)       |
| 16391       | CakSNP16391    | <i>Kabuli</i>    | <i>Ca_Kabuli_denovo</i>      | 3417                           | (G/A)       |
| 16392       | CakSNP16392    | <i>Kabuli</i>    | <i>Ca_Kabuli_denovo</i>      | 3427                           | (G/C)       |
| 16393       | CakSNP16393    | <i>Kabuli</i>    | <i>Ca_Kabuli_denovo</i>      | 3439                           | (C/G)       |
| 16394       | CakSNP16394    | <i>Kabuli</i>    | <i>Ca_Kabuli_denovo</i>      | 3710                           | (A/T)       |
| 16395       | CakSNP16395    | <i>Kabuli</i>    | <i>Ca_Kabuli_denovo</i>      | 3711                           | (T/G)       |
| 16396       | CakSNP16396    | <i>Kabuli</i>    | <i>Ca_Kabuli_denovo</i>      | 3712                           | (G/C)       |
| 16397       | CakSNP16397    | <i>Kabuli</i>    | <i>Ca_Kabuli_denovo</i>      | 3714                           | (C/G)       |
| 16398       | CakSNP16398    | <i>Kabuli</i>    | <i>Ca_Kabuli_denovo</i>      | 3715                           | (A/G)       |
| 16399       | CakSNP16399    | <i>Kabuli</i>    | <i>Ca_Kabuli_denovo</i>      | 3716                           | (G/A)       |
| 16400       | CakSNP16400    | <i>Kabuli</i>    | <i>Ca_Kabuli_denovo</i>      | 3717                           | (A/G)       |
| 16401       | CakSNP16401    | <i>Kabuli</i>    | <i>Ca_Kabuli_denovo</i>      | 3720                           | (G/T)       |
| 16402       | CakSNP16402    | <i>Kabuli</i>    | <i>Ca_Kabuli_denovo</i>      | 3721                           | (A/C)       |
| 16403       | CakSNP16403    | <i>Kabuli</i>    | <i>Ca_Kabuli_denovo</i>      | 3967                           | (G/A)       |
| 16404       | CakSNP16404    | <i>Kabuli</i>    | <i>Ca_Kabuli_denovo</i>      | 3968                           | (G/A)       |
| 16405       | CakSNP16405    | <i>Kabuli</i>    | <i>Ca_Kabuli_denovo</i>      | 3969                           | (A/G)       |
| 16406       | CakSNP16406    | <i>Kabuli</i>    | <i>Ca_Kabuli_denovo</i>      | 3970                           | (A/G)       |
| 16407       | CakSNP16407    | <i>Kabuli</i>    | <i>Ca_Kabuli_denovo</i>      | 3971                           | (G/A)       |
| 16408       | CakSNP16408    | <i>Kabuli</i>    | <i>Ca_Kabuli_denovo</i>      | 3972                           | (C/A)       |
| 16409       | CakSNP16409    | <i>Kabuli</i>    | <i>Ca_Kabuli_denovo</i>      | 3975                           | (T/G)       |
| 16410       | CakSNP16410    | <i>Kabuli</i>    | <i>Ca_Kabuli_denovo</i>      | 4061                           | (G/A)       |
| 16411       | CakSNP16411    | <i>Kabuli</i>    | <i>Ca_Kabuli_denovo</i>      | 4063                           | (G/A)       |
| 16412       | CakSNP16412    | <i>Kabuli</i>    | <i>Ca_Kabuli_denovo</i>      | 4064                           | (A/G)       |
| 16413       | CakSNP16413    | <i>Kabuli</i>    | <i>Ca_Kabuli_denovo</i>      | 4065                           | (G/C)       |
| 16414       | CakSNP16414    | <i>Kabuli</i>    | <i>Ca_Kabuli_denovo</i>      | 4066                           | (C/G)       |
| 16415       | CakSNP16415    | <i>Kabuli</i>    | <i>Ca_Kabuli_denovo</i>      | 4068                           | (T/G)       |
| 16416       | CakSNP16416    | <i>Kabuli</i>    | <i>Ca_Kabuli_denovo</i>      | 4287                           | (C/G)       |
| 16417       | CakSNP16417    | <i>Kabuli</i>    | <i>Ca_Kabuli_denovo</i>      | 4288                           | (G/A)       |

| <b>S.N.</b> | <b>SNP IDs</b> | <b>Cultivars</b> | <b>Chromosomes/scaffolds</b> | <b>Physical positions (bp)</b> | <b>SNPs</b> |
|-------------|----------------|------------------|------------------------------|--------------------------------|-------------|
| 16418       | CakSNP16418    | <i>Kabuli</i>    | <i>Ca_Kabuli_denovo</i>      | 4295                           | (A/G)       |
| 16419       | CakSNP16419    | <i>Kabuli</i>    | <i>Ca_Kabuli_denovo</i>      | 4299                           | (T/C)       |
| 16420       | CakSNP16420    | <i>Kabuli</i>    | <i>Ca_Kabuli_denovo</i>      | 4724                           | (A/G)       |
| 16421       | CakSNP16421    | <i>Kabuli</i>    | <i>Ca_Kabuli_denovo</i>      | 4725                           | (G/C)       |
| 16422       | CakSNP16422    | <i>Kabuli</i>    | <i>Ca_Kabuli_denovo</i>      | 4727                           | (G/A)       |
| 16423       | CakSNP16423    | <i>Kabuli</i>    | <i>Ca_Kabuli_denovo</i>      | 4728                           | (A/G)       |
| 16424       | CakSNP16424    | <i>Kabuli</i>    | <i>Ca_Kabuli_denovo</i>      | 4731                           | (C/A)       |
| 16425       | CakSNP16425    | <i>Kabuli</i>    | <i>Ca_Kabuli_denovo</i>      | 4732                           | (C/T)       |
| 16426       | CakSNP16426    | <i>Kabuli</i>    | <i>Ca_Kabuli_denovo</i>      | 5106                           | (C/G)       |
| 16427       | CakSNP16427    | <i>Kabuli</i>    | <i>Ca_Kabuli_denovo</i>      | 5108                           | (T/G)       |
| 16428       | CakSNP16428    | <i>Kabuli</i>    | <i>Ca_Kabuli_denovo</i>      | 5349                           | (T/G)       |
| 16429       | CakSNP16429    | <i>Kabuli</i>    | <i>Ca_Kabuli_denovo</i>      | 5394                           | (C/G)       |
| 16430       | CakSNP16430    | <i>Kabuli</i>    | <i>Ca_Kabuli_denovo</i>      | 5650                           | (C/G)       |
| 16431       | CakSNP16431    | <i>Kabuli</i>    | <i>Ca_Kabuli_denovo</i>      | 5652                           | (G/T)       |
| 16432       | CakSNP16432    | <i>Kabuli</i>    | <i>Ca_Kabuli_denovo</i>      | 5654                           | (C/T)       |
| 16433       | CakSNP16433    | <i>Kabuli</i>    | <i>Ca_Kabuli_denovo</i>      | 5655                           | (A/C)       |
| 16434       | CakSNP16434    | <i>Kabuli</i>    | <i>Ca_Kabuli_denovo</i>      | 5746                           | (G/C)       |
| 16435       | CakSNP16435    | <i>Kabuli</i>    | <i>Ca_Kabuli_denovo</i>      | 5747                           | (C/G)       |
| 16436       | CakSNP16436    | <i>Kabuli</i>    | <i>Ca_Kabuli_denovo</i>      | 5749                           | (G/T)       |
| 16437       | CakSNP16437    | <i>Kabuli</i>    | <i>Ca_Kabuli_denovo</i>      | 5751                           | (C/T)       |
| 16438       | CakSNP16438    | <i>Kabuli</i>    | <i>Ca_Kabuli_denovo</i>      | 5752                           | (A/C)       |
| 16439       | CakSNP16439    | <i>Kabuli</i>    | <i>Ca_Kabuli_denovo</i>      | 5851                           | (C/G)       |
| 16440       | CakSNP16440    | <i>Kabuli</i>    | <i>Ca_Kabuli_denovo</i>      | 5853                           | (G/T)       |
| 16441       | CakSNP16441    | <i>Kabuli</i>    | <i>Ca_Kabuli_denovo</i>      | 5855                           | (C/T)       |
| 16442       | CakSNP16442    | <i>Kabuli</i>    | <i>Ca_Kabuli_denovo</i>      | 5856                           | (A/C)       |
| 16443       | CakSNP16443    | <i>Kabuli</i>    | <i>Ca_Kabuli_denovo</i>      | 6702                           | (T/G)       |
| 16444       | CakSNP16444    | <i>Kabuli</i>    | <i>Ca_Kabuli_denovo</i>      | 6708                           | (C/G)       |
| 16445       | CakSNP16445    | <i>Kabuli</i>    | <i>Ca_Kabuli_denovo</i>      | 6727                           | (A/G)       |
| 16446       | CakSNP16446    | <i>Kabuli</i>    | <i>Ca_Kabuli_denovo</i>      | 6728                           | (C/G)       |
| 16447       | CakSNP16447    | <i>Kabuli</i>    | <i>Ca_Kabuli_denovo</i>      | 6739                           | (T/G)       |
| 16448       | CakSNP16448    | <i>Kabuli</i>    | <i>Ca_Kabuli_denovo</i>      | 6761                           | (T/G)       |
| 16449       | CakSNP16449    | <i>Kabuli</i>    | <i>Ca_Kabuli_denovo</i>      | 6773                           | (T/G)       |
| 16450       | CakSNP16450    | <i>Kabuli</i>    | <i>Ca_Kabuli_denovo</i>      | 7246                           | (C/A)       |
| 16451       | CakSNP16451    | <i>Kabuli</i>    | <i>Ca_Kabuli_denovo</i>      | 7247                           | (G/C)       |
| 16452       | CakSNP16452    | <i>Kabuli</i>    | <i>Ca_Kabuli_denovo</i>      | 7248                           | (A/C)       |
| 16453       | CakSNP16453    | <i>Kabuli</i>    | <i>Ca_Kabuli_denovo</i>      | 7251                           | (C/T)       |
| 16454       | CakSNP16454    | <i>Kabuli</i>    | <i>Ca_Kabuli_denovo</i>      | 7253                           | (T/G)       |
| 16455       | CakSNP16455    | <i>Kabuli</i>    | <i>Ca_Kabuli_denovo</i>      | 7254                           | (C/A)       |
| 16456       | CakSNP16456    | <i>Kabuli</i>    | <i>Ca_Kabuli_denovo</i>      | 7255                           | (G/T)       |

| <b>S.N.</b> | <b>SNP IDs</b> | <b>Cultivars</b> | <b>Chromosomes/scaffolds</b> | <b>Physical positions (bp)</b> | <b>SNPs</b> |
|-------------|----------------|------------------|------------------------------|--------------------------------|-------------|
| 16457       | CakSNP16457    | <i>Kabuli</i>    | <i>Ca_Kabuli_denovo</i>      | 7380                           | (A/T)       |
| 16458       | CakSNP16458    | <i>Kabuli</i>    | <i>Ca_Kabuli_denovo</i>      | 7690                           | (A/G)       |
| 16459       | CakSNP16459    | <i>Kabuli</i>    | <i>Ca_Kabuli_denovo</i>      | 7691                           | (C/G)       |
| 16460       | CakSNP16460    | <i>Kabuli</i>    | <i>Ca_Kabuli_denovo</i>      | 7883                           | (G/T)       |
| 16461       | CakSNP16461    | <i>Kabuli</i>    | <i>Ca_Kabuli_denovo</i>      | 7937                           | (C/G)       |
| 16462       | CakSNP16462    | <i>Kabuli</i>    | <i>Ca_Kabuli_denovo</i>      | 7944                           | (T/A)       |
| 16463       | CakSNP16463    | <i>Kabuli</i>    | <i>Ca_Kabuli_denovo</i>      | 7976                           | (T/G)       |
| 16464       | CakSNP16464    | <i>Kabuli</i>    | <i>Ca_Kabuli_denovo</i>      | 7999                           | (T/C)       |
| 16465       | CakSNP16465    | <i>Kabuli</i>    | <i>Ca_Kabuli_denovo</i>      | 8051                           | (C/A)       |
| 16466       | CakSNP16466    | <i>Kabuli</i>    | <i>Ca_Kabuli_denovo</i>      | 8069                           | (T/G)       |
| 16467       | CakSNP16467    | <i>Kabuli</i>    | <i>Ca_Kabuli_denovo</i>      | 8088                           | (C/A)       |
| 16468       | CakSNP16468    | <i>Kabuli</i>    | <i>Ca_Kabuli_denovo</i>      | 8136                           | (A/G)       |
| 16469       | CakSNP16469    | <i>Kabuli</i>    | <i>Ca_Kabuli_denovo</i>      | 8162                           | (T/G)       |
| 16470       | CakSNP16470    | <i>Kabuli</i>    | <i>Ca_Kabuli_denovo</i>      | 8537                           | (A/G)       |
| 16471       | CakSNP16471    | <i>Kabuli</i>    | <i>Ca_Kabuli_denovo</i>      | 8539                           | (A/C)       |
| 16472       | CakSNP16472    | <i>Kabuli</i>    | <i>Ca_Kabuli_denovo</i>      | 8541                           | (T/G)       |
| 16473       | CakSNP16473    | <i>Kabuli</i>    | <i>Ca_Kabuli_denovo</i>      | 9009                           | (G/A)       |
| 16474       | CakSNP16474    | <i>Kabuli</i>    | <i>Ca_Kabuli_denovo</i>      | 9010                           | (A/G)       |
| 16475       | CakSNP16475    | <i>Kabuli</i>    | <i>Ca_Kabuli_denovo</i>      | 9011                           | (A/G)       |
| 16476       | CakSNP16476    | <i>Kabuli</i>    | <i>Ca_Kabuli_denovo</i>      | 9012                           | (C/A)       |
| 16477       | CakSNP16477    | <i>Kabuli</i>    | <i>Ca_Kabuli_denovo</i>      | 11242                          | (C/G)       |
| 16478       | CakSNP16478    | <i>Kabuli</i>    | <i>Ca_Kabuli_denovo</i>      | 11244                          | (T/G)       |
| 16479       | CakSNP16479    | <i>Kabuli</i>    | <i>Ca_Kabuli_denovo</i>      | 11246                          | (C/T)       |
| 16480       | CakSNP16480    | <i>Kabuli</i>    | <i>Ca_Kabuli_denovo</i>      | 11711                          | (G/T)       |
| 16481       | CakSNP16481    | <i>Kabuli</i>    | <i>Ca_Kabuli_denovo</i>      | 12623                          | (A/G)       |
| 16482       | CakSNP16482    | <i>Kabuli</i>    | <i>Ca_Kabuli_denovo</i>      | 12624                          | (G/C)       |
| 16483       | CakSNP16483    | <i>Kabuli</i>    | <i>Ca_Kabuli_denovo</i>      | 12625                          | (C/G)       |
| 16484       | CakSNP16484    | <i>Kabuli</i>    | <i>Ca_Kabuli_denovo</i>      | 12627                          | (T/G)       |
| 16485       | CakSNP16485    | <i>Kabuli</i>    | <i>Ca_Kabuli_denovo</i>      | 12629                          | (C/T)       |
| 16486       | CakSNP16486    | <i>Kabuli</i>    | <i>Ca_Kabuli_denovo</i>      | 12630                          | (A/C)       |
| 16487       | CakSNP16487    | <i>Kabuli</i>    | <i>Ca_Kabuli_denovo</i>      | 13473                          | (G/A)       |
| 16488       | CakSNP16488    | <i>Kabuli</i>    | <i>Ca_Kabuli_denovo</i>      | 13475                          | (G/A)       |
| 16489       | CakSNP16489    | <i>Kabuli</i>    | <i>Ca_Kabuli_denovo</i>      | 13476                          | (A/G)       |
| 16490       | CakSNP16490    | <i>Kabuli</i>    | <i>Ca_Kabuli_denovo</i>      | 14124                          | (A/C)       |
| 16491       | CakSNP16491    | <i>Kabuli</i>    | <i>Ca_Kabuli_denovo</i>      | 14560                          | (C/A)       |
| 16492       | CakSNP16492    | <i>Kabuli</i>    | <i>Ca_Kabuli_denovo</i>      | 14672                          | (G/A)       |
| 16493       | CakSNP16493    | <i>Kabuli</i>    | <i>Ca_Kabuli_denovo</i>      | 14674                          | (G/A)       |
| 16494       | CakSNP16494    | <i>Kabuli</i>    | <i>Ca_Kabuli_denovo</i>      | 15543                          | (G/A)       |
| 16495       | CakSNP16495    | <i>Kabuli</i>    | <i>Ca_Kabuli_denovo</i>      | 15553                          | (C/A)       |



| <b>S.N.</b> | <b>SNP IDs</b> | <b>Cultivars</b> | <b>Chromosomes/scaffolds</b> | <b>Physical positions (bp)</b> | <b>SNPs</b> |
|-------------|----------------|------------------|------------------------------|--------------------------------|-------------|
| 16496       | CakSNP16496    | <i>Kabuli</i>    | <i>Ca_Kabuli_denovo</i>      | 15580                          | (G/A)       |
| 16497       | CakSNP16497    | <i>Kabuli</i>    | <i>Ca_Kabuli_denovo</i>      | 17223                          | (C/G)       |
| 16498       | CakSNP16498    | <i>Kabuli</i>    | <i>Ca_Kabuli_denovo</i>      | 17468                          | (A/G)       |
| 16499       | CakSNP16499    | <i>Kabuli</i>    | <i>Ca_Kabuli_denovo</i>      | 17469                          | (G/C)       |
| 16500       | CakSNP16500    | <i>Kabuli</i>    | <i>Ca_Kabuli_denovo</i>      | 17470                          | (C/G)       |
| 16501       | CakSNP16501    | <i>Kabuli</i>    | <i>Ca_Kabuli_denovo</i>      | 17472                          | (T/G)       |
| 16502       | CakSNP16502    | <i>Kabuli</i>    | <i>Ca_Kabuli_denovo</i>      | 17733                          | (G/C)       |
| 16503       | CakSNP16503    | <i>Kabuli</i>    | <i>Ca_Kabuli_denovo</i>      | 17734                          | (C/G)       |
| 16504       | CakSNP16504    | <i>Kabuli</i>    | <i>Ca_Kabuli_denovo</i>      | 17736                          | (T/G)       |
| 16505       | CakSNP16505    | <i>Kabuli</i>    | <i>Ca_Kabuli_denovo</i>      | 17738                          | (C/T)       |
| 16506       | CakSNP16506    | <i>Kabuli</i>    | <i>Ca_Kabuli_denovo</i>      | 18017                          | (G/A)       |
| 16507       | CakSNP16507    | <i>Kabuli</i>    | <i>Ca_Kabuli_denovo</i>      | 18019                          | (G/A)       |
| 16508       | CakSNP16508    | <i>Kabuli</i>    | <i>Ca_Kabuli_denovo</i>      | 18050                          | (G/C)       |
| 16509       | CakSNP16509    | <i>Kabuli</i>    | <i>Ca_Kabuli_denovo</i>      | 18291                          | (C/G)       |
| 16510       | CakSNP16510    | <i>Kabuli</i>    | <i>Ca_Kabuli_denovo</i>      | 18293                          | (G/T)       |
| 16511       | CakSNP16511    | <i>Kabuli</i>    | <i>Ca_Kabuli_denovo</i>      | 18295                          | (C/T)       |
| 16512       | CakSNP16512    | <i>Kabuli</i>    | <i>Ca_Kabuli_denovo</i>      | 18296                          | (A/C)       |
| 16513       | CakSNP16513    | <i>Kabuli</i>    | <i>Ca_Kabuli_denovo</i>      | 18297                          | (G/A)       |
| 16514       | CakSNP16514    | <i>Kabuli</i>    | <i>Ca_Kabuli_denovo</i>      | 18394                          | (T/G)       |
| 16515       | CakSNP16515    | <i>Kabuli</i>    | <i>Ca_Kabuli_denovo</i>      | 18450                          | (G/A)       |
| 16516       | CakSNP16516    | <i>Kabuli</i>    | <i>Ca_Kabuli_denovo</i>      | 19005                          | (C/T)       |
| 16517       | CakSNP16517    | <i>Kabuli</i>    | <i>Ca_Kabuli_denovo</i>      | 19041                          | (T/C)       |
| 16518       | CakSNP16518    | <i>Kabuli</i>    | <i>Ca_Kabuli_denovo</i>      | 19048                          | (G/C)       |
| 16519       | CakSNP16519    | <i>Kabuli</i>    | <i>Ca_Kabuli_denovo</i>      | 20080                          | (C/G)       |
| 16520       | CakSNP16520    | <i>Kabuli</i>    | <i>Ca_Kabuli_denovo</i>      | 20081                          | (G/A)       |
| 16521       | CakSNP16521    | <i>Kabuli</i>    | <i>Ca_Kabuli_denovo</i>      | 20082                          | (A/T)       |
| 16522       | CakSNP16522    | <i>Kabuli</i>    | <i>Ca_Kabuli_denovo</i>      | 20083                          | (G/C)       |
| 16523       | CakSNP16523    | <i>Kabuli</i>    | <i>Ca_Kabuli_denovo</i>      | 20084                          | (T/A)       |
| 16524       | CakSNP16524    | <i>Kabuli</i>    | <i>Ca_Kabuli_denovo</i>      | 20086                          | (G/C)       |
| 16525       | CakSNP16525    | <i>Kabuli</i>    | <i>Ca_Kabuli_denovo</i>      | 20087                          | (T/G)       |
| 16526       | CakSNP16526    | <i>Kabuli</i>    | <i>Ca_Kabuli_denovo</i>      | 21257                          | (C/A)       |
| 16527       | CakSNP16527    | <i>Kabuli</i>    | <i>Ca_Kabuli_denovo</i>      | 22000                          | (T/G)       |
| 16528       | CakSNP16528    | <i>Kabuli</i>    | <i>Ca_Kabuli_denovo</i>      | 22013                          | (A/G)       |
| 16529       | CakSNP16529    | <i>Kabuli</i>    | <i>Ca_Kabuli_denovo</i>      | 22039                          | (G/T)       |
| 16530       | CakSNP16530    | <i>Kabuli</i>    | <i>Ca_Kabuli_denovo</i>      | 22242                          | (A/G)       |
| 16531       | CakSNP16531    | <i>Kabuli</i>    | <i>Ca_Kabuli_denovo</i>      | 22320                          | (T/A)       |
| 16532       | CakSNP16532    | <i>Kabuli</i>    | <i>Ca_Kabuli_denovo</i>      | 27708                          | (C/G)       |
| 16533       | CakSNP16533    | <i>Kabuli</i>    | <i>Ca_Kabuli_denovo</i>      | 27709                          | (G/A)       |
| 16534       | CakSNP16534    | <i>Kabuli</i>    | <i>Ca_Kabuli_denovo</i>      | 27710                          | (G/A)       |

| <b>S.N.</b> | <b>SNP IDs</b> | <b>Cultivars</b> | <b>Chromosomes/scaffolds</b> | <b>Physical positions (bp)</b> | <b>SNPs</b> |
|-------------|----------------|------------------|------------------------------|--------------------------------|-------------|
| 16535       | CakSNP16535    | <i>Kabuli</i>    | <i>Ca_Kabuli_denovo</i>      | 27711                          | (A/G)       |
| 16536       | CakSNP16536    | <i>Kabuli</i>    | <i>Ca_Kabuli_denovo</i>      | 27712                          | (C/A)       |
| 16537       | CakSNP16537    | <i>Kabuli</i>    | <i>Ca_Kabuli_denovo</i>      | 27714                          | (G/C)       |
| 16538       | CakSNP16538    | <i>Kabuli</i>    | <i>Ca_Kabuli_denovo</i>      | 27715                          | (A/G)       |
| 16539       | CakSNP16539    | <i>Kabuli</i>    | <i>Ca_Kabuli_denovo</i>      | 28816                          | (G/T)       |
| 16540       | CakSNP16540    | <i>Kabuli</i>    | <i>Ca_Kabuli_denovo</i>      | 28818                          | (C/T)       |
| 16541       | CakSNP16541    | <i>Kabuli</i>    | <i>Ca_Kabuli_denovo</i>      | 29384                          | (A/G)       |
| 16542       | CakSNP16542    | <i>Kabuli</i>    | <i>Ca_Kabuli_denovo</i>      | 32328                          | (G/A)       |
| 16543       | CakSNP16543    | <i>Kabuli</i>    | <i>Ca_Kabuli_denovo</i>      | 32330                          | (G/A)       |
| 16544       | CakSNP16544    | <i>Kabuli</i>    | <i>Ca_Kabuli_denovo</i>      | 32331                          | (A/G)       |
| 16545       | CakSNP16545    | <i>Kabuli</i>    | <i>Ca_Kabuli_denovo</i>      | 33189                          | (G/A)       |
| 16546       | CakSNP16546    | <i>Kabuli</i>    | <i>Ca_Kabuli_denovo</i>      | 34679                          | (G/T)       |
| 16547       | CakSNP16547    | <i>Kabuli</i>    | <i>Ca_Kabuli_denovo</i>      | 34680                          | (C/G)       |
| 16548       | CakSNP16548    | <i>Kabuli</i>    | <i>Ca_Kabuli_denovo</i>      | 34682                          | (C/G)       |
| 16549       | CakSNP16549    | <i>Kabuli</i>    | <i>Ca_Kabuli_denovo</i>      | 34683                          | (G/A)       |
| 16550       | CakSNP16550    | <i>Kabuli</i>    | <i>Ca_Kabuli_denovo</i>      | 34684                          | (A/G)       |
| 16551       | CakSNP16551    | <i>Kabuli</i>    | <i>Ca_Kabuli_denovo</i>      | 34685                          | (G/A)       |
| 16552       | CakSNP16552    | <i>Kabuli</i>    | <i>Ca_Kabuli_denovo</i>      | 34858                          | (G/A)       |
| 16553       | CakSNP16553    | <i>Kabuli</i>    | <i>Ca_Kabuli_denovo</i>      | 34860                          | (G/A)       |
| 16554       | CakSNP16554    | <i>Kabuli</i>    | <i>Ca_Kabuli_denovo</i>      | 35627                          | (T/G)       |
| 16555       | CakSNP16555    | <i>Kabuli</i>    | <i>Ca_Kabuli_denovo</i>      | 35634                          | (A/G)       |
| 16556       | CakSNP16556    | <i>Kabuli</i>    | <i>Ca_Kabuli_denovo</i>      | 35645                          | (C/A)       |
| 16557       | CakSNP16557    | <i>Kabuli</i>    | <i>Ca_Kabuli_denovo</i>      | 35661                          | (G/A)       |
| 16558       | CakSNP16558    | <i>Kabuli</i>    | <i>Ca_Kabuli_denovo</i>      | 35679                          | (C/G)       |
| 16559       | CakSNP16559    | <i>Kabuli</i>    | <i>Ca_Kabuli_denovo</i>      | 36295                          | (C/G)       |
| 16560       | CakSNP16560    | <i>Kabuli</i>    | <i>Ca_Kabuli_denovo</i>      | 36358                          | (G/C)       |
| 16561       | CakSNP16561    | <i>Kabuli</i>    | <i>Ca_Kabuli_denovo</i>      | 36359                          | (T/A)       |
| 16562       | CakSNP16562    | <i>Kabuli</i>    | <i>Ca_Kabuli_denovo</i>      | 36361                          | (G/C)       |
| 16563       | CakSNP16563    | <i>Kabuli</i>    | <i>Ca_Kabuli_denovo</i>      | 36362                          | (T/G)       |
| 16564       | CakSNP16564    | <i>Kabuli</i>    | <i>Ca_Kabuli_denovo</i>      | 36544                          | (T/G)       |
| 16565       | CakSNP16565    | <i>Kabuli</i>    | <i>Ca_Kabuli_denovo</i>      | 36545                          | (G/C)       |
| 16566       | CakSNP16566    | <i>Kabuli</i>    | <i>Ca_Kabuli_denovo</i>      | 36547                          | (G/C)       |
| 16567       | CakSNP16567    | <i>Kabuli</i>    | <i>Ca_Kabuli_denovo</i>      | 36548                          | (A/G)       |
| 16568       | CakSNP16568    | <i>Kabuli</i>    | <i>Ca_Kabuli_denovo</i>      | 36549                          | (G/A)       |
| 16569       | CakSNP16569    | <i>Kabuli</i>    | <i>Ca_Kabuli_denovo</i>      | 36550                          | (A/G)       |
| 16570       | CakSNP16570    | <i>Kabuli</i>    | <i>Ca_Kabuli_denovo</i>      | 36620                          | (G/C)       |
| 16571       | CakSNP16571    | <i>Kabuli</i>    | <i>Ca_Kabuli_denovo</i>      | 36621                          | (C/A)       |
| 16572       | CakSNP16572    | <i>Kabuli</i>    | <i>Ca_Kabuli_denovo</i>      | 36622                          | (A/G)       |
| 16573       | CakSNP16573    | <i>Kabuli</i>    | <i>Ca_Kabuli_denovo</i>      | 36624                          | (A/G)       |

| <b>S.N.</b> | <b>SNP IDs</b> | <b>Cultivars</b> | <b>Chromosomes/scaffolds</b> | <b>Physical positions (bp)</b> | <b>SNPs</b> |
|-------------|----------------|------------------|------------------------------|--------------------------------|-------------|
| 16574       | CakSNP16574    | <i>Kabuli</i>    | <i>Ca_Kabuli_denovo</i>      | 36626                          | (T/A)       |
| 16575       | CakSNP16575    | <i>Kabuli</i>    | <i>Ca_Kabuli_denovo</i>      | 36627                          | (G/T)       |
| 16576       | CakSNP16576    | <i>Kabuli</i>    | <i>Ca_Kabuli_denovo</i>      | 36628                          | (C/G)       |
| 16577       | CakSNP16577    | <i>Kabuli</i>    | <i>Ca_Kabuli_denovo</i>      | 36630                          | (G/C)       |
| 16578       | CakSNP16578    | <i>Kabuli</i>    | <i>Ca_Kabuli_denovo</i>      | 37457                          | (G/C)       |
| 16579       | CakSNP16579    | <i>Kabuli</i>    | <i>Ca_Kabuli_denovo</i>      | 37458                          | (C/A)       |
| 16580       | CakSNP16580    | <i>Kabuli</i>    | <i>Ca_Kabuli_denovo</i>      | 37459                          | (A/G)       |
| 16581       | CakSNP16581    | <i>Kabuli</i>    | <i>Ca_Kabuli_denovo</i>      | 37461                          | (G/A)       |
| 16582       | CakSNP16582    | <i>Kabuli</i>    | <i>Ca_Kabuli_denovo</i>      | 37463                          | (A/T)       |
| 16583       | CakSNP16583    | <i>Kabuli</i>    | <i>Ca_Kabuli_denovo</i>      | 37464                          | (T/G)       |
| 16584       | CakSNP16584    | <i>Kabuli</i>    | <i>Ca_Kabuli_denovo</i>      | 37465                          | (C/G)       |
| 16585       | CakSNP16585    | <i>Kabuli</i>    | <i>Ca_Kabuli_denovo</i>      | 37467                          | (G/C)       |
| 16586       | CakSNP16586    | <i>Kabuli</i>    | <i>Ca_Kabuli_denovo</i>      | 37468                          | (A/G)       |
| 16587       | CakSNP16587    | <i>Kabuli</i>    | <i>Ca_Kabuli_denovo</i>      | 37469                          | (G/A)       |
| 16588       | CakSNP16588    | <i>Kabuli</i>    | <i>Ca_Kabuli_denovo</i>      | 38106                          | (G/A)       |
| 16589       | CakSNP16589    | <i>Kabuli</i>    | <i>Ca_Kabuli_denovo</i>      | 38108                          | (T/G)       |
| 16590       | CakSNP16590    | <i>Kabuli</i>    | <i>Ca_Kabuli_denovo</i>      | 38109                          | (T/A)       |
| 16591       | CakSNP16591    | <i>Kabuli</i>    | <i>Ca_Kabuli_denovo</i>      | 38110                          | (C/A)       |
| 16592       | CakSNP16592    | <i>Kabuli</i>    | <i>Ca_Kabuli_denovo</i>      | 38111                          | (T/A)       |
| 16593       | CakSNP16593    | <i>Kabuli</i>    | <i>Ca_Kabuli_denovo</i>      | 38114                          | (C/A)       |
| 16594       | CakSNP16594    | <i>Kabuli</i>    | <i>Ca_Kabuli_denovo</i>      | 38932                          | (G/A)       |
| 16595       | CakSNP16595    | <i>Kabuli</i>    | <i>Ca_Kabuli_denovo</i>      | 38934                          | (G/A)       |
| 16596       | CakSNP16596    | <i>Kabuli</i>    | <i>Ca_Kabuli_denovo</i>      | 40259                          | (A/G)       |
| 16597       | CakSNP16597    | <i>Kabuli</i>    | <i>Ca_Kabuli_denovo</i>      | 40260                          | (G/C)       |
| 16598       | CakSNP16598    | <i>Kabuli</i>    | <i>Ca_Kabuli_denovo</i>      | 40261                          | (C/A)       |
| 16599       | CakSNP16599    | <i>Kabuli</i>    | <i>Ca_Kabuli_denovo</i>      | 40262                          | (A/G)       |
| 16600       | CakSNP16600    | <i>Kabuli</i>    | <i>Ca_Kabuli_denovo</i>      | 40264                          | (G/A)       |
| 16601       | CakSNP16601    | <i>Kabuli</i>    | <i>Ca_Kabuli_denovo</i>      | 40266                          | (T/A)       |
| 16602       | CakSNP16602    | <i>Kabuli</i>    | <i>Ca_Kabuli_denovo</i>      | 40267                          | (G/T)       |
| 16603       | CakSNP16603    | <i>Kabuli</i>    | <i>Ca_Kabuli_denovo</i>      | 40268                          | (C/G)       |
| 16604       | CakSNP16604    | <i>Kabuli</i>    | <i>Ca_Kabuli_denovo</i>      | 40270                          | (G/C)       |
| 16605       | CakSNP16605    | <i>Kabuli</i>    | <i>Ca_Kabuli_denovo</i>      | 41456                          | (T/C)       |
| 16606       | CakSNP16606    | <i>Kabuli</i>    | <i>Ca_Kabuli_denovo</i>      | 41457                          | (T/A)       |
| 16607       | CakSNP16607    | <i>Kabuli</i>    | <i>Ca_Kabuli_denovo</i>      | 41458                          | (G/C)       |
| 16608       | CakSNP16608    | <i>Kabuli</i>    | <i>Ca_Kabuli_denovo</i>      | 41460                          | (A/G)       |
| 16609       | CakSNP16609    | <i>Kabuli</i>    | <i>Ca_Kabuli_denovo</i>      | 41888                          | (A/T)       |
| 16610       | CakSNP16610    | <i>Kabuli</i>    | <i>Ca_Kabuli_denovo</i>      | 41895                          | (C/A)       |
| 16611       | CakSNP16611    | <i>Kabuli</i>    | <i>Ca_Kabuli_denovo</i>      | 44072                          | (T/G)       |
| 16612       | CakSNP16612    | <i>Kabuli</i>    | <i>Ca_Kabuli_denovo</i>      | 44074                          | (C/T)       |

| <b>S.N.</b> | <b>SNP IDs</b> | <b>Cultivars</b> | <b>Chromosomes/scaffolds</b> | <b>Physical positions (bp)</b> | <b>SNPs</b> |
|-------------|----------------|------------------|------------------------------|--------------------------------|-------------|
| 16613       | CakSNP16613    | <i>Kabuli</i>    | <i>Ca_Kabuli_denovo</i>      | 45632                          | (A/C)       |
| 16614       | CakSNP16614    | <i>Kabuli</i>    | <i>Ca_Kabuli_denovo</i>      | 45635                          | (C/T)       |
| 16615       | CakSNP16615    | <i>Kabuli</i>    | <i>Ca_Kabuli_denovo</i>      | 45637                          | (T/G)       |
| 16616       | CakSNP16616    | <i>Kabuli</i>    | <i>Ca_Kabuli_denovo</i>      | 45639                          | (G/A)       |
| 16617       | CakSNP16617    | <i>Kabuli</i>    | <i>Ca_Kabuli_denovo</i>      | 48879                          | (T/G)       |
| 16618       | CakSNP16618    | <i>Kabuli</i>    | <i>Ca_Kabuli_denovo</i>      | 49259                          | (G/A)       |
| 16619       | CakSNP16619    | <i>Kabuli</i>    | <i>Ca_Kabuli_denovo</i>      | 49260                          | (A/G)       |
| 16620       | CakSNP16620    | <i>Kabuli</i>    | <i>Ca_Kabuli_denovo</i>      | 49261                          | (A/G)       |
| 16621       | CakSNP16621    | <i>Kabuli</i>    | <i>Ca_Kabuli_denovo</i>      | 49262                          | (G/A)       |
| 16622       | CakSNP16622    | <i>Kabuli</i>    | <i>Ca_Kabuli_denovo</i>      | 49263                          | (C/A)       |
| 16623       | CakSNP16623    | <i>Kabuli</i>    | <i>Ca_Kabuli_denovo</i>      | 49265                          | (G/C)       |
| 16624       | CakSNP16624    | <i>Kabuli</i>    | <i>Ca_Kabuli_denovo</i>      | 49932                          | (C/G)       |
| 16625       | CakSNP16625    | <i>Kabuli</i>    | <i>Ca_Kabuli_denovo</i>      | 49934                          | (T/G)       |
| 16626       | CakSNP16626    | <i>Kabuli</i>    | <i>Ca_Kabuli_denovo</i>      | 49936                          | (C/T)       |
| 16627       | CakSNP16627    | <i>Kabuli</i>    | <i>Ca_Kabuli_denovo</i>      | 50705                          | (T/G)       |
| 16628       | CakSNP16628    | <i>Kabuli</i>    | <i>Ca_Kabuli_denovo</i>      | 50712                          | (T/C)       |
| 16629       | CakSNP16629    | <i>Kabuli</i>    | <i>Ca_Kabuli_denovo</i>      | 50914                          | (G/A)       |
| 16630       | CakSNP16630    | <i>Kabuli</i>    | <i>Ca_Kabuli_denovo</i>      | 51290                          | (C/G)       |
| 16631       | CakSNP16631    | <i>Kabuli</i>    | <i>Ca_Kabuli_denovo</i>      | 51357                          | (T/G)       |
| 16632       | CakSNP16632    | <i>Kabuli</i>    | <i>Ca_Kabuli_denovo</i>      | 51491                          | (A/G)       |
| 16633       | CakSNP16633    | <i>Kabuli</i>    | <i>Ca_Kabuli_denovo</i>      | 51528                          | (T/C)       |
| 16634       | CakSNP16634    | <i>Kabuli</i>    | <i>Ca_Kabuli_denovo</i>      | 51691                          | (G/C)       |
| 16635       | CakSNP16635    | <i>Kabuli</i>    | <i>Ca_Kabuli_denovo</i>      | 51720                          | (T/G)       |
| 16636       | CakSNP16636    | <i>Kabuli</i>    | <i>Ca_Kabuli_denovo</i>      | 51737                          | (C/G)       |
| 16637       | CakSNP16637    | <i>Kabuli</i>    | <i>Ca_Kabuli_denovo</i>      | 51993                          | (T/G)       |
| 16638       | CakSNP16638    | <i>Kabuli</i>    | <i>Ca_Kabuli_denovo</i>      | 52004                          | (C/A)       |
| 16639       | CakSNP16639    | <i>Kabuli</i>    | <i>Ca_Kabuli_denovo</i>      | 52027                          | (G/T)       |
| 16640       | CakSNP16640    | <i>Kabuli</i>    | <i>Ca_Kabuli_denovo</i>      | 52098                          | (A/G)       |
| 16641       | CakSNP16641    | <i>Kabuli</i>    | <i>Ca_Kabuli_denovo</i>      | 52113                          | (G/T)       |
| 16642       | CakSNP16642    | <i>Kabuli</i>    | <i>Ca_Kabuli_denovo</i>      | 52290                          | (A/G)       |
| 16643       | CakSNP16643    | <i>Kabuli</i>    | <i>Ca_Kabuli_denovo</i>      | 52303                          | (A/C)       |
| 16644       | CakSNP16644    | <i>Kabuli</i>    | <i>Ca_Kabuli_denovo</i>      | 53001                          | (C/A)       |
| 16645       | CakSNP16645    | <i>Kabuli</i>    | <i>Ca_Kabuli_denovo</i>      | 53002                          | (A/G)       |
| 16646       | CakSNP16646    | <i>Kabuli</i>    | <i>Ca_Kabuli_denovo</i>      | 53003                          | (G/C)       |
| 16647       | CakSNP16647    | <i>Kabuli</i>    | <i>Ca_Kabuli_denovo</i>      | 53207                          | (T/G)       |
| 16648       | CakSNP16648    | <i>Kabuli</i>    | <i>Ca_Kabuli_denovo</i>      | 53219                          | (C/A)       |
| 16649       | CakSNP16649    | <i>Kabuli</i>    | <i>Ca_Kabuli_denovo</i>      | 53399                          | (G/C)       |
| 16650       | CakSNP16650    | <i>Kabuli</i>    | <i>Ca_Kabuli_denovo</i>      | 53594                          | (G/A)       |
| 16651       | CakSNP16651    | <i>Kabuli</i>    | <i>Ca_Kabuli_denovo</i>      | 53782                          | (C/A)       |

| <b>S.N.</b> | <b>SNP IDs</b> | <b>Cultivars</b> | <b>Chromosomes/scaffolds</b> | <b>Physical positions (bp)</b> | <b>SNPs</b> |
|-------------|----------------|------------------|------------------------------|--------------------------------|-------------|
| 16652       | CakSNP16652    | <i>Kabuli</i>    | <i>Ca_Kabuli_denovo</i>      | 53972                          | (G/A)       |
| 16653       | CakSNP16653    | <i>Kabuli</i>    | <i>Ca_Kabuli_denovo</i>      | 54229                          | (T/G)       |
| 16654       | CakSNP16654    | <i>Kabuli</i>    | <i>Ca_Kabuli_denovo</i>      | 54262                          | (A/G)       |
| 16655       | CakSNP16655    | <i>Kabuli</i>    | <i>Ca_Kabuli_denovo</i>      | 54267                          | (T/G)       |
| 16656       | CakSNP16656    | <i>Kabuli</i>    | <i>Ca_Kabuli_denovo</i>      | 54513                          | (C/G)       |
| 16657       | CakSNP16657    | <i>Kabuli</i>    | <i>Ca_Kabuli_denovo</i>      | 54540                          | (A/G)       |
| 16658       | CakSNP16658    | <i>Kabuli</i>    | <i>Ca_Kabuli_denovo</i>      | 54870                          | (A/C)       |
| 16659       | CakSNP16659    | <i>Kabuli</i>    | <i>Ca_Kabuli_denovo</i>      | 54877                          | (A/G)       |
| 16660       | CakSNP16660    | <i>Kabuli</i>    | <i>Ca_Kabuli_denovo</i>      | 54880                          | (T/C)       |
| 16661       | CakSNP16661    | <i>Kabuli</i>    | <i>Ca_Kabuli_denovo</i>      | 54888                          | (C/G)       |
| 16662       | CakSNP16662    | <i>Kabuli</i>    | <i>Ca_Kabuli_denovo</i>      | 54895                          | (T/G)       |
| 16663       | CakSNP16663    | <i>Kabuli</i>    | <i>Ca_Kabuli_denovo</i>      | 54900                          | (C/G)       |
| 16664       | CakSNP16664    | <i>Kabuli</i>    | <i>Ca_Kabuli_denovo</i>      | 54909                          | (T/G)       |
| 16665       | CakSNP16665    | <i>Kabuli</i>    | <i>Ca_Kabuli_denovo</i>      | 54910                          | (C/G)       |
| 16666       | CakSNP16666    | <i>Kabuli</i>    | <i>Ca_Kabuli_denovo</i>      | 54911                          | (A/G)       |
| 16667       | CakSNP16667    | <i>Kabuli</i>    | <i>Ca_Kabuli_denovo</i>      | 54915                          | (T/A)       |
| 16668       | CakSNP16668    | <i>Kabuli</i>    | <i>Ca_Kabuli_denovo</i>      | 54932                          | (T/G)       |
| 16669       | CakSNP16669    | <i>Kabuli</i>    | <i>Ca_Kabuli_denovo</i>      | 55406                          | (T/C)       |
| 16670       | CakSNP16670    | <i>Kabuli</i>    | <i>Ca_Kabuli_denovo</i>      | 55407                          | (T/A)       |
| 16671       | CakSNP16671    | <i>Kabuli</i>    | <i>Ca_Kabuli_denovo</i>      | 55408                          | (G/C)       |
| 16672       | CakSNP16672    | <i>Kabuli</i>    | <i>Ca_Kabuli_denovo</i>      | 55409                          | (C/A)       |
| 16673       | CakSNP16673    | <i>Kabuli</i>    | <i>Ca_Kabuli_denovo</i>      | 55504                          | (G/C)       |
| 16674       | CakSNP16674    | <i>Kabuli</i>    | <i>Ca_Kabuli_denovo</i>      | 55505                          | (G/A)       |
| 16675       | CakSNP16675    | <i>Kabuli</i>    | <i>Ca_Kabuli_denovo</i>      | 55506                          | (A/G)       |
| 16676       | CakSNP16676    | <i>Kabuli</i>    | <i>Ca_Kabuli_denovo</i>      | 56193                          | (T/G)       |
| 16677       | CakSNP16677    | <i>Kabuli</i>    | <i>Ca_Kabuli_denovo</i>      | 56223                          | (T/G)       |
| 16678       | CakSNP16678    | <i>Kabuli</i>    | <i>Ca_Kabuli_denovo</i>      | 56260                          | (G/C)       |
| 16679       | CakSNP16679    | <i>Kabuli</i>    | <i>Ca_Kabuli_denovo</i>      | 56261                          | (G/A)       |
| 16680       | CakSNP16680    | <i>Kabuli</i>    | <i>Ca_Kabuli_denovo</i>      | 56262                          | (A/C)       |
| 16681       | CakSNP16681    | <i>Kabuli</i>    | <i>Ca_Kabuli_denovo</i>      | 56263                          | (T/C)       |
| 16682       | CakSNP16682    | <i>Kabuli</i>    | <i>Ca_Kabuli_denovo</i>      | 56264                          | (C/G)       |
| 16683       | CakSNP16683    | <i>Kabuli</i>    | <i>Ca_Kabuli_denovo</i>      | 56266                          | (C/T)       |
| 16684       | CakSNP16684    | <i>Kabuli</i>    | <i>Ca_Kabuli_denovo</i>      | 56344                          | (G/C)       |
| 16685       | CakSNP16685    | <i>Kabuli</i>    | <i>Ca_Kabuli_denovo</i>      | 56345                          | (A/G)       |
| 16686       | CakSNP16686    | <i>Kabuli</i>    | <i>Ca_Kabuli_denovo</i>      | 56442                          | (C/A)       |
| 16687       | CakSNP16687    | <i>Kabuli</i>    | <i>Ca_Kabuli_denovo</i>      | 56443                          | (G/C)       |
| 16688       | CakSNP16688    | <i>Kabuli</i>    | <i>Ca_Kabuli_denovo</i>      | 56444                          | (A/G)       |
| 16689       | CakSNP16689    | <i>Kabuli</i>    | <i>Ca_Kabuli_denovo</i>      | 56620                          | (C/A)       |
| 16690       | CakSNP16690    | <i>Kabuli</i>    | <i>Ca_Kabuli_denovo</i>      | 56621                          | (A/T)       |

| <b>S.N.</b> | <b>SNP IDs</b> | <b>Cultivars</b> | <b>Chromosomes/scaffolds</b> | <b>Physical positions (bp)</b> | <b>SNPs</b> |
|-------------|----------------|------------------|------------------------------|--------------------------------|-------------|
| 16691       | CakSNP16691    | <i>Kabuli</i>    | <i>Ca_Kabuli_denovo</i>      | 56623                          | (G/C)       |
| 16692       | CakSNP16692    | <i>Kabuli</i>    | <i>Ca_Kabuli_denovo</i>      | 56624                          | (C/A)       |
| 16693       | CakSNP16693    | <i>Kabuli</i>    | <i>Ca_Kabuli_denovo</i>      | 56625                          | (G/A)       |
| 16694       | CakSNP16694    | <i>Kabuli</i>    | <i>Ca_Kabuli_denovo</i>      | 56721                          | (C/A)       |
| 16695       | CakSNP16695    | <i>Kabuli</i>    | <i>Ca_Kabuli_denovo</i>      | 56723                          | (C/G)       |
| 16696       | CakSNP16696    | <i>Kabuli</i>    | <i>Ca_Kabuli_denovo</i>      | 56724                          | (G/A)       |
| 16697       | CakSNP16697    | <i>Kabuli</i>    | <i>Ca_Kabuli_denovo</i>      | 56811                          | (A/T)       |
| 16698       | CakSNP16698    | <i>Kabuli</i>    | <i>Ca_Kabuli_denovo</i>      | 56812                          | (T/G)       |
| 16699       | CakSNP16699    | <i>Kabuli</i>    | <i>Ca_Kabuli_denovo</i>      | 56813                          | (G/C)       |
| 16700       | CakSNP16700    | <i>Kabuli</i>    | <i>Ca_Kabuli_denovo</i>      | 56815                          | (C/G)       |
| 16701       | CakSNP16701    | <i>Kabuli</i>    | <i>Ca_Kabuli_denovo</i>      | 56816                          | (G/A)       |
| 16702       | CakSNP16702    | <i>Kabuli</i>    | <i>Ca_Kabuli_denovo</i>      | 56817                          | (G/A)       |
| 16703       | CakSNP16703    | <i>Kabuli</i>    | <i>Ca_Kabuli_denovo</i>      | 56818                          | (A/G)       |
| 16704       | CakSNP16704    | <i>Kabuli</i>    | <i>Ca_Kabuli_denovo</i>      | 56900                          | (A/G)       |
| 16705       | CakSNP16705    | <i>Kabuli</i>    | <i>Ca_Kabuli_denovo</i>      | 56902                          | (G/A)       |
| 16706       | CakSNP16706    | <i>Kabuli</i>    | <i>Ca_Kabuli_denovo</i>      | 56904                          | (A/T)       |
| 16707       | CakSNP16707    | <i>Kabuli</i>    | <i>Ca_Kabuli_denovo</i>      | 56905                          | (T/G)       |
| 16708       | CakSNP16708    | <i>Kabuli</i>    | <i>Ca_Kabuli_denovo</i>      | 56906                          | (G/C)       |
| 16709       | CakSNP16709    | <i>Kabuli</i>    | <i>Ca_Kabuli_denovo</i>      | 56908                          | (C/G)       |
| 16710       | CakSNP16710    | <i>Kabuli</i>    | <i>Ca_Kabuli_denovo</i>      | 56909                          | (G/A)       |
| 16711       | CakSNP16711    | <i>Kabuli</i>    | <i>Ca_Kabuli_denovo</i>      | 56910                          | (A/G)       |
| 16712       | CakSNP16712    | <i>Kabuli</i>    | <i>Ca_Kabuli_denovo</i>      | 56911                          | (G/A)       |
| 16713       | CakSNP16713    | <i>Kabuli</i>    | <i>Ca_Kabuli_denovo</i>      | 56912                          | (A/C)       |
| 16714       | CakSNP16714    | <i>Kabuli</i>    | <i>Ca_Kabuli_denovo</i>      | 56913                          | (T/C)       |
| 16715       | CakSNP16715    | <i>Kabuli</i>    | <i>Ca_Kabuli_denovo</i>      | 56915                          | (G/C)       |
| 16716       | CakSNP16716    | <i>Kabuli</i>    | <i>Ca_Kabuli_denovo</i>      | 56916                          | (T/A)       |
| 16717       | CakSNP16717    | <i>Kabuli</i>    | <i>Ca_Kabuli_denovo</i>      | 57097                          | (T/G)       |
| 16718       | CakSNP16718    | <i>Kabuli</i>    | <i>Ca_Kabuli_denovo</i>      | 57098                          | (C/A)       |
| 16719       | CakSNP16719    | <i>Kabuli</i>    | <i>Ca_Kabuli_denovo</i>      | 57100                          | (C/T)       |
| 16720       | CakSNP16720    | <i>Kabuli</i>    | <i>Ca_Kabuli_denovo</i>      | 57101                          | (G/C)       |
| 16721       | CakSNP16721    | <i>Kabuli</i>    | <i>Ca_Kabuli_denovo</i>      | 57170                          | (C/G)       |
| 16722       | CakSNP16722    | <i>Kabuli</i>    | <i>Ca_Kabuli_denovo</i>      | 57172                          | (G/T)       |
| 16723       | CakSNP16723    | <i>Kabuli</i>    | <i>Ca_Kabuli_denovo</i>      | 57174                          | (T/C)       |
| 16724       | CakSNP16724    | <i>Kabuli</i>    | <i>Ca_Kabuli_denovo</i>      | 57175                          | (C/A)       |
| 16725       | CakSNP16725    | <i>Kabuli</i>    | <i>Ca_Kabuli_denovo</i>      | 57176                          | (A/G)       |
| 16726       | CakSNP16726    | <i>Kabuli</i>    | <i>Ca_Kabuli_denovo</i>      | 57177                          | (C/G)       |
| 16727       | CakSNP16727    | <i>Kabuli</i>    | <i>Ca_Kabuli_denovo</i>      | 57178                          | (A/C)       |
| 16728       | CakSNP16728    | <i>Kabuli</i>    | <i>Ca_Kabuli_denovo</i>      | 57193                          | (G/T)       |
| 16729       | CakSNP16729    | <i>Kabuli</i>    | <i>Ca_Kabuli_denovo</i>      | 57194                          | (A/C)       |

| <b>S.N.</b> | <b>SNP IDs</b> | <b>Cultivars</b> | <b>Chromosomes/scaffolds</b> | <b>Physical positions (bp)</b> | <b>SNPs</b> |
|-------------|----------------|------------------|------------------------------|--------------------------------|-------------|
| 16730       | CakSNP16730    | <i>Kabuli</i>    | <i>Ca_Kabuli_denovo</i>      | 57195                          | (T/G)       |
| 16731       | CakSNP16731    | <i>Kabuli</i>    | <i>Ca_Kabuli_denovo</i>      | 57196                          | (C/T)       |
| 16732       | CakSNP16732    | <i>Kabuli</i>    | <i>Ca_Kabuli_denovo</i>      | 57271                          | (C/A)       |
| 16733       | CakSNP16733    | <i>Kabuli</i>    | <i>Ca_Kabuli_denovo</i>      | 57272                          | (A/G)       |
| 16734       | CakSNP16734    | <i>Kabuli</i>    | <i>Ca_Kabuli_denovo</i>      | 57275                          | (A/G)       |
| 16735       | CakSNP16735    | <i>Kabuli</i>    | <i>Ca_Kabuli_denovo</i>      | 57276                          | (A/T)       |
| 16736       | CakSNP16736    | <i>Kabuli</i>    | <i>Ca_Kabuli_denovo</i>      | 57277                          | (G/T)       |
| 16737       | CakSNP16737    | <i>Kabuli</i>    | <i>Ca_Kabuli_denovo</i>      | 57278                          | (A/C)       |
| 16738       | CakSNP16738    | <i>Kabuli</i>    | <i>Ca_Kabuli_denovo</i>      | 57280                          | (C/G)       |
| 16739       | CakSNP16739    | <i>Kabuli</i>    | <i>Ca_Kabuli_denovo</i>      | 57281                          | (G/A)       |
| 16740       | CakSNP16740    | <i>Kabuli</i>    | <i>Ca_Kabuli_denovo</i>      | 57282                          | (A/G)       |
| 16741       | CakSNP16741    | <i>Kabuli</i>    | <i>Ca_Kabuli_denovo</i>      | 57283                          | (T/A)       |
| 16742       | CakSNP16742    | <i>Kabuli</i>    | <i>Ca_Kabuli_denovo</i>      | 57285                          | (T/C)       |
| 16743       | CakSNP16743    | <i>Kabuli</i>    | <i>Ca_Kabuli_denovo</i>      | 57286                          | (C/G)       |
| 16744       | CakSNP16744    | <i>Kabuli</i>    | <i>Ca_Kabuli_denovo</i>      | 57287                          | (G/A)       |
| 16745       | CakSNP16745    | <i>Kabuli</i>    | <i>Ca_Kabuli_denovo</i>      | 57289                          | (A/C)       |
| 16746       | CakSNP16746    | <i>Kabuli</i>    | <i>Ca_Kabuli_denovo</i>      | 57955                          | (A/G)       |
| 16747       | CakSNP16747    | <i>Kabuli</i>    | <i>Ca_Kabuli_denovo</i>      | 57990                          | (T/G)       |
| 16748       | CakSNP16748    | <i>Kabuli</i>    | <i>Ca_Kabuli_denovo</i>      | 58026                          | (A/C)       |
| 16749       | CakSNP16749    | <i>Kabuli</i>    | <i>Ca_Kabuli_denovo</i>      | 58029                          | (C/T)       |
| 16750       | CakSNP16750    | <i>Kabuli</i>    | <i>Ca_Kabuli_denovo</i>      | 58031                          | (T/G)       |
| 16751       | CakSNP16751    | <i>Kabuli</i>    | <i>Ca_Kabuli_denovo</i>      | 58032                          | (C/A)       |
| 16752       | CakSNP16752    | <i>Kabuli</i>    | <i>Ca_Kabuli_denovo</i>      | 58033                          | (G/T)       |
| 16753       | CakSNP16753    | <i>Kabuli</i>    | <i>Ca_Kabuli_denovo</i>      | 58046                          | (T/G)       |
| 16754       | CakSNP16754    | <i>Kabuli</i>    | <i>Ca_Kabuli_denovo</i>      | 58761                          | (G/A)       |
| 16755       | CakSNP16755    | <i>Kabuli</i>    | <i>Ca_Kabuli_denovo</i>      | 58763                          | (G/A)       |
| 16756       | CakSNP16756    | <i>Kabuli</i>    | <i>Ca_Kabuli_denovo</i>      | 58765                          | (G/A)       |
| 16757       | CakSNP16757    | <i>Kabuli</i>    | <i>Ca_Kabuli_denovo</i>      | 59113                          | (G/T)       |
| 16758       | CakSNP16758    | <i>Kabuli</i>    | <i>Ca_Kabuli_denovo</i>      | 60062                          | (C/G)       |
| 16759       | CakSNP16759    | <i>Kabuli</i>    | <i>Ca_Kabuli_denovo</i>      | 60064                          | (T/G)       |
| 16760       | CakSNP16760    | <i>Kabuli</i>    | <i>Ca_Kabuli_denovo</i>      | 60066                          | (C/T)       |
| 16761       | CakSNP16761    | <i>Kabuli</i>    | <i>Ca_Kabuli_denovo</i>      | 60711                          | (G/A)       |
| 16762       | CakSNP16762    | <i>Kabuli</i>    | <i>Ca_Kabuli_denovo</i>      | 60712                          | (A/G)       |
| 16763       | CakSNP16763    | <i>Kabuli</i>    | <i>Ca_Kabuli_denovo</i>      | 62231                          | (G/A)       |
| 16764       | CakSNP16764    | <i>Kabuli</i>    | <i>Ca_Kabuli_denovo</i>      | 62282                          | (G/A)       |
| 16765       | CakSNP16765    | <i>Kabuli</i>    | <i>Ca_Kabuli_denovo</i>      | 62560                          | (G/A)       |
| 16766       | CakSNP16766    | <i>Kabuli</i>    | <i>Ca_Kabuli_denovo</i>      | 62562                          | (G/A)       |
| 16767       | CakSNP16767    | <i>Kabuli</i>    | <i>Ca_Kabuli_denovo</i>      | 63303                          | (C/G)       |
| 16768       | CakSNP16768    | <i>Kabuli</i>    | <i>Ca_Kabuli_denovo</i>      | 63305                          | (T/G)       |

| <b>S.N.</b> | <b>SNP IDs</b> | <b>Cultivars</b> | <b>Chromosomes/scaffolds</b> | <b>Physical positions (bp)</b> | <b>SNPs</b> |
|-------------|----------------|------------------|------------------------------|--------------------------------|-------------|
| 16769       | CakSNP16769    | <i>Kabuli</i>    | <i>Ca_Kabuli_denovo</i>      | 63307                          | (C/T)       |
| 16770       | CakSNP16770    | <i>Kabuli</i>    | <i>Ca_Kabuli_denovo</i>      | 64427                          | (T/C)       |
| 16771       | CakSNP16771    | <i>Kabuli</i>    | <i>Ca_Kabuli_denovo</i>      | 64428                          | (T/A)       |
| 16772       | CakSNP16772    | <i>Kabuli</i>    | <i>Ca_Kabuli_denovo</i>      | 64429                          | (G/C)       |
| 16773       | CakSNP16773    | <i>Kabuli</i>    | <i>Ca_Kabuli_denovo</i>      | 64525                          | (C/G)       |
| 16774       | CakSNP16774    | <i>Kabuli</i>    | <i>Ca_Kabuli_denovo</i>      | 64526                          | (G/A)       |
| 16775       | CakSNP16775    | <i>Kabuli</i>    | <i>Ca_Kabuli_denovo</i>      | 66001                          | (G/A)       |
| 16776       | CakSNP16776    | <i>Kabuli</i>    | <i>Ca_Kabuli_denovo</i>      | 66003                          | (G/A)       |
| 16777       | CakSNP16777    | <i>Kabuli</i>    | <i>Ca_Kabuli_denovo</i>      | 66373                          | (G/A)       |
| 16778       | CakSNP16778    | <i>Kabuli</i>    | <i>Ca_Kabuli_denovo</i>      | 67505                          | (A/G)       |
| 16779       | CakSNP16779    | <i>Kabuli</i>    | <i>Ca_Kabuli_denovo</i>      | 67506                          | (C/G)       |
| 16780       | CakSNP16780    | <i>Kabuli</i>    | <i>Ca_Kabuli_denovo</i>      | 67912                          | (G/T)       |
| 16781       | CakSNP16781    | <i>Kabuli</i>    | <i>Ca_Kabuli_denovo</i>      | 68709                          | (G/A)       |
| 16782       | CakSNP16782    | <i>Kabuli</i>    | <i>Ca_Kabuli_denovo</i>      | 68710                          | (C/G)       |
| 16783       | CakSNP16783    | <i>Kabuli</i>    | <i>Ca_Kabuli_denovo</i>      | 68711                          | (A/C)       |
| 16784       | CakSNP16784    | <i>Kabuli</i>    | <i>Ca_Kabuli_denovo</i>      | 68712                          | (A/G)       |
| 16785       | CakSNP16785    | <i>Kabuli</i>    | <i>Ca_Kabuli_denovo</i>      | 68714                          | (G/A)       |
| 16786       | CakSNP16786    | <i>Kabuli</i>    | <i>Ca_Kabuli_denovo</i>      | 68716                          | (A/T)       |
| 16787       | CakSNP16787    | <i>Kabuli</i>    | <i>Ca_Kabuli_denovo</i>      | 69930                          | (C/G)       |
| 16788       | CakSNP16788    | <i>Kabuli</i>    | <i>Ca_Kabuli_denovo</i>      | 69932                          | (G/T)       |
| 16789       | CakSNP16789    | <i>Kabuli</i>    | <i>Ca_Kabuli_denovo</i>      | 69934                          | (C/T)       |
| 16790       | CakSNP16790    | <i>Kabuli</i>    | <i>Ca_Kabuli_denovo</i>      | 69935                          | (A/C)       |
| 16791       | CakSNP16791    | <i>Kabuli</i>    | <i>Ca_Kabuli_denovo</i>      | 69936                          | (G/A)       |
| 16792       | CakSNP16792    | <i>Kabuli</i>    | <i>Ca_Kabuli_denovo</i>      | 69937                          | (C/G)       |
| 16793       | CakSNP16793    | <i>Kabuli</i>    | <i>Ca_Kabuli_denovo</i>      | 71409                          | (G/A)       |
| 16794       | CakSNP16794    | <i>Kabuli</i>    | <i>Ca_Kabuli_denovo</i>      | 71411                          | (G/A)       |
| 16795       | CakSNP16795    | <i>Kabuli</i>    | <i>Ca_Kabuli_denovo</i>      | 72745                          | (G/T)       |
| 16796       | CakSNP16796    | <i>Kabuli</i>    | <i>Ca_Kabuli_denovo</i>      | 74388                          | (G/C)       |
| 16797       | CakSNP16797    | <i>Kabuli</i>    | <i>Ca_Kabuli_denovo</i>      | 74389                          | (C/G)       |
| 16798       | CakSNP16798    | <i>Kabuli</i>    | <i>Ca_Kabuli_denovo</i>      | 74391                          | (T/G)       |
| 16799       | CakSNP16799    | <i>Kabuli</i>    | <i>Ca_Kabuli_denovo</i>      | 74393                          | (C/T)       |
| 16800       | CakSNP16800    | <i>Kabuli</i>    | <i>Ca_Kabuli_denovo</i>      | 74394                          | (A/C)       |
| 16801       | CakSNP16801    | <i>Kabuli</i>    | <i>Ca_Kabuli_denovo</i>      | 74952                          | (C/G)       |
| 16802       | CakSNP16802    | <i>Kabuli</i>    | <i>Ca_Kabuli_denovo</i>      | 74954                          | (G/T)       |
| 16803       | CakSNP16803    | <i>Kabuli</i>    | <i>Ca_Kabuli_denovo</i>      | 74956                          | (C/T)       |
| 16804       | CakSNP16804    | <i>Kabuli</i>    | <i>Ca_Kabuli_denovo</i>      | 74957                          | (A/C)       |
| 16805       | CakSNP16805    | <i>Kabuli</i>    | <i>Ca_Kabuli_denovo</i>      | 74958                          | (G/A)       |
| 16806       | CakSNP16806    | <i>Kabuli</i>    | <i>Ca_Kabuli_denovo</i>      | 74959                          | (C/G)       |
| 16807       | CakSNP16807    | <i>Kabuli</i>    | <i>Ca_Kabuli_denovo</i>      | 74972                          | (A/G)       |



| <b>S.N.</b> | <b>SNP IDs</b> | <b>Cultivars</b> | <b>Chromosomes/scaffolds</b> | <b>Physical positions (bp)</b> | <b>SNPs</b> |
|-------------|----------------|------------------|------------------------------|--------------------------------|-------------|
| 16808       | CakSNP16808    | <i>Kabuli</i>    | <i>Ca_Kabuli_denovo</i>      | 75008                          | (G/A)       |
| 16809       | CakSNP16809    | <i>Kabuli</i>    | <i>Ca_Kabuli_denovo</i>      | 76173                          | (A/G)       |
| 16810       | CakSNP16810    | <i>Kabuli</i>    | <i>Ca_Kabuli_denovo</i>      | 76178                          | (G/A)       |
| 16811       | CakSNP16811    | <i>Kabuli</i>    | <i>Ca_Kabuli_denovo</i>      | 76193                          | (C/G)       |
| 16812       | CakSNP16812    | <i>Kabuli</i>    | <i>Ca_Kabuli_denovo</i>      | 76204                          | (C/G)       |
| 16813       | CakSNP16813    | <i>Kabuli</i>    | <i>Ca_Kabuli_denovo</i>      | 76218                          | (T/G)       |
| 16814       | CakSNP16814    | <i>Kabuli</i>    | <i>Ca_Kabuli_denovo</i>      | 76228                          | (G/C)       |
| 16815       | CakSNP16815    | <i>Kabuli</i>    | <i>Ca_Kabuli_denovo</i>      | 76288                          | (C/T)       |
| 16816       | CakSNP16816    | <i>Kabuli</i>    | <i>Ca_Kabuli_denovo</i>      | 76295                          | (G/T)       |
| 16817       | CakSNP16817    | <i>Kabuli</i>    | <i>Ca_Kabuli_denovo</i>      | 76452                          | (T/A)       |
| 16818       | CakSNP16818    | <i>Kabuli</i>    | <i>Ca_Kabuli_denovo</i>      | 76513                          | (A/G)       |
| 16819       | CakSNP16819    | <i>Kabuli</i>    | <i>Ca_Kabuli_denovo</i>      | 76517                          | (T/C)       |
| 16820       | CakSNP16820    | <i>Kabuli</i>    | <i>Ca_Kabuli_denovo</i>      | 76530                          | (T/G)       |
| 16821       | CakSNP16821    | <i>Kabuli</i>    | <i>Ca_Kabuli_denovo</i>      | 76561                          | (G/T)       |
| 16822       | CakSNP16822    | <i>Kabuli</i>    | <i>Ca_Kabuli_denovo</i>      | 76579                          | (G/A)       |
| 16823       | CakSNP16823    | <i>Kabuli</i>    | <i>Ca_Kabuli_denovo</i>      | 77007                          | (T/A)       |
| 16824       | CakSNP16824    | <i>Kabuli</i>    | <i>Ca_Kabuli_denovo</i>      | 77013                          | (A/T)       |
| 16825       | CakSNP16825    | <i>Kabuli</i>    | <i>Ca_Kabuli_denovo</i>      | 77051                          | (T/A)       |
| 16826       | CakSNP16826    | <i>Kabuli</i>    | <i>Ca_Kabuli_denovo</i>      | 77063                          | (A/G)       |
| 16827       | CakSNP16827    | <i>Kabuli</i>    | <i>Ca_Kabuli_denovo</i>      | 78895                          | (C/T)       |
| 16828       | CakSNP16828    | <i>Kabuli</i>    | <i>Ca_Kabuli_denovo</i>      | 78946                          | (C/T)       |
| 16829       | CakSNP16829    | <i>Kabuli</i>    | <i>Ca_Kabuli_denovo</i>      | 79307                          | (T/A)       |
| 16830       | CakSNP16830    | <i>Kabuli</i>    | <i>Ca_Kabuli_denovo</i>      | 79308                          | (T/G)       |
| 16831       | CakSNP16831    | <i>Kabuli</i>    | <i>Ca_Kabuli_denovo</i>      | 79309                          | (C/G)       |
| 16832       | CakSNP16832    | <i>Kabuli</i>    | <i>Ca_Kabuli_denovo</i>      | 79311                          | (A/G)       |
| 16833       | CakSNP16833    | <i>Kabuli</i>    | <i>Ca_Kabuli_denovo</i>      | 79312                          | (T/C)       |
| 16834       | CakSNP16834    | <i>Kabuli</i>    | <i>Ca_Kabuli_denovo</i>      | 79313                          | (G/A)       |
| 16835       | CakSNP16835    | <i>Kabuli</i>    | <i>Ca_Kabuli_denovo</i>      | 83072                          | (C/T)       |
| 16836       | CakSNP16836    | <i>Kabuli</i>    | <i>Ca_Kabuli_denovo</i>      | 83103                          | (C/G)       |
| 16837       | CakSNP16837    | <i>Kabuli</i>    | <i>Ca_Kabuli_denovo</i>      | 83773                          | (C/G)       |
| 16838       | CakSNP16838    | <i>Kabuli</i>    | <i>Ca_Kabuli_denovo</i>      | 83775                          | (A/G)       |
| 16839       | CakSNP16839    | <i>Kabuli</i>    | <i>Ca_Kabuli_denovo</i>      | 83776                          | (T/C)       |
| 16840       | CakSNP16840    | <i>Kabuli</i>    | <i>Ca_Kabuli_denovo</i>      | 83777                          | (G/A)       |
| 16841       | CakSNP16841    | <i>Kabuli</i>    | <i>Ca_Kabuli_denovo</i>      | 83885                          | (A/C)       |
| 16842       | CakSNP16842    | <i>Kabuli</i>    | <i>Ca_Kabuli_denovo</i>      | 84999                          | (T/G)       |
| 16843       | CakSNP16843    | <i>Kabuli</i>    | <i>Ca_Kabuli_denovo</i>      | 85000                          | (G/A)       |
| 16844       | CakSNP16844    | <i>Kabuli</i>    | <i>Ca_Kabuli_denovo</i>      | 85001                          | (C/G)       |
| 16845       | CakSNP16845    | <i>Kabuli</i>    | <i>Ca_Kabuli_denovo</i>      | 85003                          | (G/C)       |
| 16846       | CakSNP16846    | <i>Kabuli</i>    | <i>Ca_Kabuli_denovo</i>      | 89165                          | (G/A)       |

| <b>S.N.</b> | <b>SNP IDs</b> | <b>Cultivars</b> | <b>Chromosomes/scaffolds</b> | <b>Physical positions (bp)</b> | <b>SNPs</b> |
|-------------|----------------|------------------|------------------------------|--------------------------------|-------------|
| 16847       | CakSNP16847    | <i>Kabuli</i>    | <i>Ca_Kabuli_denovo</i>      | 89167                          | (G/A)       |
| 16848       | CakSNP16848    | <i>Kabuli</i>    | <i>Ca_Kabuli_denovo</i>      | 89731                          | (C/G)       |
| 16849       | CakSNP16849    | <i>Kabuli</i>    | <i>Ca_Kabuli_denovo</i>      | 89733                          | (A/G)       |
| 16850       | CakSNP16850    | <i>Kabuli</i>    | <i>Ca_Kabuli_denovo</i>      | 89829                          | (G/A)       |
| 16851       | CakSNP16851    | <i>Kabuli</i>    | <i>Ca_Kabuli_denovo</i>      | 89830                          | (G/A)       |
| 16852       | CakSNP16852    | <i>Kabuli</i>    | <i>Ca_Kabuli_denovo</i>      | 90103                          | (G/A)       |
| 16853       | CakSNP16853    | <i>Kabuli</i>    | <i>Ca_Kabuli_denovo</i>      | 90105                          | (G/A)       |
| 16854       | CakSNP16854    | <i>Kabuli</i>    | <i>Ca_Kabuli_denovo</i>      | 90106                          | (A/G)       |
| 16855       | CakSNP16855    | <i>Kabuli</i>    | <i>Ca_Kabuli_denovo</i>      | 90209                          | (A/C)       |
| 16856       | CakSNP16856    | <i>Kabuli</i>    | <i>Ca_Kabuli_denovo</i>      | 90210                          | (G/T)       |
| 16857       | CakSNP16857    | <i>Kabuli</i>    | <i>Ca_Kabuli_denovo</i>      | 90211                          | (A/G)       |
| 16858       | CakSNP16858    | <i>Kabuli</i>    | <i>Ca_Kabuli_denovo</i>      | 90488                          | (A/C)       |
| 16859       | CakSNP16859    | <i>Kabuli</i>    | <i>Ca_Kabuli_denovo</i>      | 92231                          | (G/A)       |
| 16860       | CakSNP16860    | <i>Kabuli</i>    | <i>Ca_Kabuli_denovo</i>      | 92233                          | (G/A)       |
| 16861       | CakSNP16861    | <i>Kabuli</i>    | <i>Ca_Kabuli_denovo</i>      | 92989                          | (T/A)       |
| 16862       | CakSNP16862    | <i>Kabuli</i>    | <i>Ca_Kabuli_denovo</i>      | 92990                          | (G/T)       |
| 16863       | CakSNP16863    | <i>Kabuli</i>    | <i>Ca_Kabuli_denovo</i>      | 94682                          | (G/A)       |
| 16864       | CakSNP16864    | <i>Kabuli</i>    | <i>Ca_Kabuli_denovo</i>      | 94731                          | (G/A)       |
| 16865       | CakSNP16865    | <i>Kabuli</i>    | <i>Ca_Kabuli_denovo</i>      | 96656                          | (C/T)       |
| 16866       | CakSNP16866    | <i>Kabuli</i>    | <i>Ca_Kabuli_denovo</i>      | 96658                          | (A/C)       |
| 16867       | CakSNP16867    | <i>Kabuli</i>    | <i>Ca_Kabuli_denovo</i>      | 96660                          | (G/A)       |
| 16868       | CakSNP16868    | <i>Kabuli</i>    | <i>Ca_Kabuli_denovo</i>      | 96989                          | (A/G)       |
| 16869       | CakSNP16869    | <i>Kabuli</i>    | <i>Ca_Kabuli_denovo</i>      | 96991                          | (A/G)       |
| 16870       | CakSNP16870    | <i>Kabuli</i>    | <i>Ca_Kabuli_denovo</i>      | 96993                          | (T/A)       |
| 16871       | CakSNP16871    | <i>Kabuli</i>    | <i>Ca_Kabuli_denovo</i>      | 96994                          | (G/T)       |
| 16872       | CakSNP16872    | <i>Kabuli</i>    | <i>Ca_Kabuli_denovo</i>      | 96995                          | (C/G)       |
| 16873       | CakSNP16873    | <i>Kabuli</i>    | <i>Ca_Kabuli_denovo</i>      | 98504                          | (A/G)       |
| 16874       | CakSNP16874    | <i>Kabuli</i>    | <i>Ca_Kabuli_denovo</i>      | 98519                          | (A/G)       |
| 16875       | CakSNP16875    | <i>Kabuli</i>    | <i>Ca_Kabuli_denovo</i>      | 98520                          | (A/G)       |
| 16876       | CakSNP16876    | <i>Kabuli</i>    | <i>Ca_Kabuli_denovo</i>      | 98532                          | (G/A)       |
| 16877       | CakSNP16877    | <i>Kabuli</i>    | <i>Ca_Kabuli_denovo</i>      | 98534                          | (C/G)       |
| 16878       | CakSNP16878    | <i>Kabuli</i>    | <i>Ca_Kabuli_denovo</i>      | 98536                          | (C/G)       |
| 16879       | CakSNP16879    | <i>Kabuli</i>    | <i>Ca_Kabuli_denovo</i>      | 98537                          | (A/G)       |
| 16880       | CakSNP16880    | <i>Kabuli</i>    | <i>Ca_Kabuli_denovo</i>      | 98550                          | (A/C)       |
| 16881       | CakSNP16881    | <i>Kabuli</i>    | <i>Ca_Kabuli_denovo</i>      | 98564                          | (A/G)       |
| 16882       | CakSNP16882    | <i>Kabuli</i>    | <i>Ca_Kabuli_denovo</i>      | 98567                          | (A/G)       |
| 16883       | CakSNP16883    | <i>Kabuli</i>    | <i>Ca_Kabuli_denovo</i>      | 98874                          | (T/A)       |
| 16884       | CakSNP16884    | <i>Kabuli</i>    | <i>Ca_Kabuli_denovo</i>      | 98885                          | (T/C)       |
| 16885       | CakSNP16885    | <i>Kabuli</i>    | <i>Ca_Kabuli_denovo</i>      | 98887                          | (T/C)       |

| <b>S.N.</b> | <b>SNP IDs</b> | <b>Cultivars</b> | <b>Chromosomes/scaffolds</b> | <b>Physical positions (bp)</b> | <b>SNPs</b> |
|-------------|----------------|------------------|------------------------------|--------------------------------|-------------|
| 16886       | CakSNP16886    | <i>Kabuli</i>    | <i>Ca_Kabuli_denovo</i>      | 98913                          | (G/T)       |
| 16887       | CakSNP16887    | <i>Kabuli</i>    | <i>Ca_Kabuli_denovo</i>      | 99120                          | (T/C)       |
| 16888       | CakSNP16888    | <i>Kabuli</i>    | <i>Ca_Kabuli_denovo</i>      | 99137                          | (A/G)       |
| 16889       | CakSNP16889    | <i>Kabuli</i>    | <i>Ca_Kabuli_denovo</i>      | 99210                          | (C/G)       |
| 16890       | CakSNP16890    | <i>Kabuli</i>    | <i>Ca_Kabuli_denovo</i>      | 99212                          | (T/G)       |
| 16891       | CakSNP16891    | <i>Kabuli</i>    | <i>Ca_Kabuli_denovo</i>      | 99214                          | (C/T)       |
| 16892       | CakSNP16892    | <i>Kabuli</i>    | <i>Ca_Kabuli_denovo</i>      | 99215                          | (A/C)       |
| 16893       | CakSNP16893    | <i>Kabuli</i>    | <i>Ca_Kabuli_denovo</i>      | 99985                          | (A/G)       |
| 16894       | CakSNP16894    | <i>Kabuli</i>    | <i>Ca_Kabuli_denovo</i>      | 99996                          | (A/G)       |
| 16895       | CakSNP16895    | <i>Kabuli</i>    | <i>Ca_Kabuli_denovo</i>      | 99997                          | (A/G)       |
| 16896       | CakSNP16896    | <i>Kabuli</i>    | <i>Ca_Kabuli_denovo</i>      | 100026                         | (C/G)       |
| 16897       | CakSNP16897    | <i>Kabuli</i>    | <i>Ca_Kabuli_denovo</i>      | 100032                         | (A/G)       |
| 16898       | CakSNP16898    | <i>Kabuli</i>    | <i>Ca_Kabuli_denovo</i>      | 100035                         | (A/T)       |
| 16899       | CakSNP16899    | <i>Kabuli</i>    | <i>Ca_Kabuli_denovo</i>      | 100038                         | (C/G)       |
| 16900       | CakSNP16900    | <i>Kabuli</i>    | <i>Ca_Kabuli_denovo</i>      | 100039                         | (C/G)       |
| 16901       | CakSNP16901    | <i>Kabuli</i>    | <i>Ca_Kabuli_denovo</i>      | 100051                         | (A/G)       |
| 16902       | CakSNP16902    | <i>Kabuli</i>    | <i>Ca_Kabuli_denovo</i>      | 100054                         | (A/G)       |
| 16903       | CakSNP16903    | <i>Kabuli</i>    | <i>Ca_Kabuli_denovo</i>      | 100063                         | (A/G)       |
| 16904       | CakSNP16904    | <i>Kabuli</i>    | <i>Ca_Kabuli_denovo</i>      | 101348                         | (T/G)       |
| 16905       | CakSNP16905    | <i>Kabuli</i>    | <i>Ca_Kabuli_denovo</i>      | 101357                         | (A/G)       |
| 16906       | CakSNP16906    | <i>Kabuli</i>    | <i>Ca_Kabuli_denovo</i>      | 101358                         | (A/C)       |
| 16907       | CakSNP16907    | <i>Kabuli</i>    | <i>Ca_Kabuli_denovo</i>      | 101359                         | (T/C)       |
| 16908       | CakSNP16908    | <i>Kabuli</i>    | <i>Ca_Kabuli_denovo</i>      | 101361                         | (A/C)       |
| 16909       | CakSNP16909    | <i>Kabuli</i>    | <i>Ca_Kabuli_denovo</i>      | 101362                         | (G/C)       |
| 16910       | CakSNP16910    | <i>Kabuli</i>    | <i>Ca_Kabuli_denovo</i>      | 101363                         | (A/G)       |
| 16911       | CakSNP16911    | <i>Kabuli</i>    | <i>Ca_Kabuli_denovo</i>      | 101364                         | (C/A)       |
| 16912       | CakSNP16912    | <i>Kabuli</i>    | <i>Ca_Kabuli_denovo</i>      | 101367                         | (A/C)       |
| 16913       | CakSNP16913    | <i>Kabuli</i>    | <i>Ca_Kabuli_denovo</i>      | 101371                         | (C/T)       |
| 16914       | CakSNP16914    | <i>Kabuli</i>    | <i>Ca_Kabuli_denovo</i>      | 101919                         | (C/A)       |
| 16915       | CakSNP16915    | <i>Kabuli</i>    | <i>Ca_Kabuli_denovo</i>      | 101920                         | (C/T)       |
| 16916       | CakSNP16916    | <i>Kabuli</i>    | <i>Ca_Kabuli_denovo</i>      | 101921                         | (G/C)       |
| 16917       | CakSNP16917    | <i>Kabuli</i>    | <i>Ca_Kabuli_denovo</i>      | 102039                         | (A/G)       |
| 16918       | CakSNP16918    | <i>Kabuli</i>    | <i>Ca_Kabuli_denovo</i>      | 102047                         | (G/A)       |
| 16919       | CakSNP16919    | <i>Kabuli</i>    | <i>Ca_Kabuli_denovo</i>      | 102091                         | (A/C)       |
| 16920       | CakSNP16920    | <i>Kabuli</i>    | <i>Ca_Kabuli_denovo</i>      | 102099                         | (C/T)       |
| 16921       | CakSNP16921    | <i>Kabuli</i>    | <i>Ca_Kabuli_denovo</i>      | 102171                         | (G/A)       |
| 16922       | CakSNP16922    | <i>Kabuli</i>    | <i>Ca_Kabuli_denovo</i>      | 102173                         | (G/A)       |
| 16923       | CakSNP16923    | <i>Kabuli</i>    | <i>Ca_Kabuli_denovo</i>      | 105285                         | (C/G)       |
| 16924       | CakSNP16924    | <i>Kabuli</i>    | <i>Ca_Kabuli_denovo</i>      | 105303                         | (C/G)       |

| <b>S.N.</b> | <b>SNP IDs</b> | <b>Cultivars</b> | <b>Chromosomes/scaffolds</b> | <b>Physical positions (bp)</b> | <b>SNPs</b> |
|-------------|----------------|------------------|------------------------------|--------------------------------|-------------|
| 16925       | CakSNP16925    | <i>Kabuli</i>    | <i>Ca_Kabuli_denovo</i>      | 105305                         | (T/C)       |
| 16926       | CakSNP16926    | <i>Kabuli</i>    | <i>Ca_Kabuli_denovo</i>      | 105319                         | (G/T)       |
| 16927       | CakSNP16927    | <i>Kabuli</i>    | <i>Ca_Kabuli_denovo</i>      | 105320                         | (T/G)       |
| 16928       | CakSNP16928    | <i>Kabuli</i>    | <i>Ca_Kabuli_denovo</i>      | 105321                         | (C/A)       |
| 16929       | CakSNP16929    | <i>Kabuli</i>    | <i>Ca_Kabuli_denovo</i>      | 105326                         | (T/G)       |
| 16930       | CakSNP16930    | <i>Kabuli</i>    | <i>Ca_Kabuli_denovo</i>      | 105336                         | (A/G)       |
| 16931       | CakSNP16931    | <i>Kabuli</i>    | <i>Ca_Kabuli_denovo</i>      | 105339                         | (C/G)       |
| 16932       | CakSNP16932    | <i>Kabuli</i>    | <i>Ca_Kabuli_denovo</i>      | 105790                         | (G/T)       |
| 16933       | CakSNP16933    | <i>Kabuli</i>    | <i>Ca_Kabuli_denovo</i>      | 105792                         | (T/C)       |
| 16934       | CakSNP16934    | <i>Kabuli</i>    | <i>Ca_Kabuli_denovo</i>      | 105795                         | (A/C)       |
| 16935       | CakSNP16935    | <i>Kabuli</i>    | <i>Ca_Kabuli_denovo</i>      | 105819                         | (G/T)       |
| 16936       | CakSNP16936    | <i>Kabuli</i>    | <i>Ca_Kabuli_denovo</i>      | 106278                         | (A/G)       |
| 16937       | CakSNP16937    | <i>Kabuli</i>    | <i>Ca_Kabuli_denovo</i>      | 106280                         | (C/G)       |
| 16938       | CakSNP16938    | <i>Kabuli</i>    | <i>Ca_Kabuli_denovo</i>      | 106282                         | (T/G)       |
| 16939       | CakSNP16939    | <i>Kabuli</i>    | <i>Ca_Kabuli_denovo</i>      | 106284                         | (C/T)       |
| 16940       | CakSNP16940    | <i>Kabuli</i>    | <i>Ca_Kabuli_denovo</i>      | 107119                         | (C/G)       |
| 16941       | CakSNP16941    | <i>Kabuli</i>    | <i>Ca_Kabuli_denovo</i>      | 107120                         | (A/C)       |
| 16942       | CakSNP16942    | <i>Kabuli</i>    | <i>Ca_Kabuli_denovo</i>      | 107121                         | (G/C)       |
| 16943       | CakSNP16943    | <i>Kabuli</i>    | <i>Ca_Kabuli_denovo</i>      | 107124                         | (G/A)       |
| 16944       | CakSNP16944    | <i>Kabuli</i>    | <i>Ca_Kabuli_denovo</i>      | 107125                         | (A/T)       |
| 16945       | CakSNP16945    | <i>Kabuli</i>    | <i>Ca_Kabuli_denovo</i>      | 110466                         | (G/A)       |
| 16946       | CakSNP16946    | <i>Kabuli</i>    | <i>Ca_Kabuli_denovo</i>      | 110468                         | (G/A)       |
| 16947       | CakSNP16947    | <i>Kabuli</i>    | <i>Ca_Kabuli_denovo</i>      | 111292                         | (C/G)       |
| 16948       | CakSNP16948    | <i>Kabuli</i>    | <i>Ca_Kabuli_denovo</i>      | 111294                         | (T/G)       |
| 16949       | CakSNP16949    | <i>Kabuli</i>    | <i>Ca_Kabuli_denovo</i>      | 111296                         | (C/T)       |
| 16950       | CakSNP16950    | <i>Kabuli</i>    | <i>Ca_Kabuli_denovo</i>      | 115118                         | (A/C)       |
| 16951       | CakSNP16951    | <i>Kabuli</i>    | <i>Ca_Kabuli_denovo</i>      | 115119                         | (G/C)       |
| 16952       | CakSNP16952    | <i>Kabuli</i>    | <i>Ca_Kabuli_denovo</i>      | 115122                         | (G/A)       |
| 16953       | CakSNP16953    | <i>Kabuli</i>    | <i>Ca_Kabuli_denovo</i>      | 115123                         | (A/T)       |
| 16954       | CakSNP16954    | <i>Kabuli</i>    | <i>Ca_Kabuli_denovo</i>      | 115219                         | (G/C)       |
| 16955       | CakSNP16955    | <i>Kabuli</i>    | <i>Ca_Kabuli_denovo</i>      | 115220                         | (A/G)       |
| 16956       | CakSNP16956    | <i>Kabuli</i>    | <i>Ca_Kabuli_denovo</i>      | 115768                         | (C/A)       |
| 16957       | CakSNP16957    | <i>Kabuli</i>    | <i>Ca_Kabuli_denovo</i>      | 115769                         | (T/A)       |
| 16958       | CakSNP16958    | <i>Kabuli</i>    | <i>Ca_Kabuli_denovo</i>      | 115771                         | (C/G)       |
| 16959       | CakSNP16959    | <i>Kabuli</i>    | <i>Ca_Kabuli_denovo</i>      | 116794                         | (G/A)       |
| 16960       | CakSNP16960    | <i>Kabuli</i>    | <i>Ca_Kabuli_denovo</i>      | 116795                         | (A/T)       |
| 16961       | CakSNP16961    | <i>Kabuli</i>    | <i>Ca_Kabuli_denovo</i>      | 116796                         | (G/A)       |
| 16962       | CakSNP16962    | <i>Kabuli</i>    | <i>Ca_Kabuli_denovo</i>      | 116797                         | (C/T)       |
| 16963       | CakSNP16963    | <i>Kabuli</i>    | <i>Ca_Kabuli_denovo</i>      | 116798                         | (C/G)       |

| <b>S.N.</b> | <b>SNP IDs</b> | <b>Cultivars</b> | <b>Chromosomes/scaffolds</b> | <b>Physical positions (bp)</b> | <b>SNPs</b> |
|-------------|----------------|------------------|------------------------------|--------------------------------|-------------|
| 16964       | CakSNP16964    | <i>Kabuli</i>    | <i>Ca_Kabuli_denovo</i>      | 116954                         | (A/G)       |
| 16965       | CakSNP16965    | <i>Kabuli</i>    | <i>Ca_Kabuli_denovo</i>      | 117155                         | (A/G)       |
| 16966       | CakSNP16966    | <i>Kabuli</i>    | <i>Ca_Kabuli_denovo</i>      | 117163                         | (T/C)       |
| 16967       | CakSNP16967    | <i>Kabuli</i>    | <i>Ca_Kabuli_denovo</i>      | 117344                         | (T/C)       |
| 16968       | CakSNP16968    | <i>Kabuli</i>    | <i>Ca_Kabuli_denovo</i>      | 117345                         | (T/A)       |
| 16969       | CakSNP16969    | <i>Kabuli</i>    | <i>Ca_Kabuli_denovo</i>      | 117346                         | (G/C)       |
| 16970       | CakSNP16970    | <i>Kabuli</i>    | <i>Ca_Kabuli_denovo</i>      | 117347                         | (G/A)       |
| 16971       | CakSNP16971    | <i>Kabuli</i>    | <i>Ca_Kabuli_denovo</i>      | 117802                         | (A/G)       |
| 16972       | CakSNP16972    | <i>Kabuli</i>    | <i>Ca_Kabuli_denovo</i>      | 117804                         | (A/G)       |
| 16973       | CakSNP16973    | <i>Kabuli</i>    | <i>Ca_Kabuli_denovo</i>      | 117806                         | (T/C)       |
| 16974       | CakSNP16974    | <i>Kabuli</i>    | <i>Ca_Kabuli_denovo</i>      | 117807                         | (T/G)       |
| 16975       | CakSNP16975    | <i>Kabuli</i>    | <i>Ca_Kabuli_denovo</i>      | 117901                         | (G/C)       |
| 16976       | CakSNP16976    | <i>Kabuli</i>    | <i>Ca_Kabuli_denovo</i>      | 117996                         | (T/G)       |
| 16977       | CakSNP16977    | <i>Kabuli</i>    | <i>Ca_Kabuli_denovo</i>      | 118000                         | (G/C)       |
| 16978       | CakSNP16978    | <i>Kabuli</i>    | <i>Ca_Kabuli_denovo</i>      | 118002                         | (A/G)       |
| 16979       | CakSNP16979    | <i>Kabuli</i>    | <i>Ca_Kabuli_denovo</i>      | 119682                         | (C/G)       |
| 16980       | CakSNP16980    | <i>Kabuli</i>    | <i>Ca_Kabuli_denovo</i>      | 119765                         | (A/G)       |
| 16981       | CakSNP16981    | <i>Kabuli</i>    | <i>Ca_Kabuli_denovo</i>      | 119767                         | (A/C)       |
| 16982       | CakSNP16982    | <i>Kabuli</i>    | <i>Ca_Kabuli_denovo</i>      | 122783                         | (T/C)       |
| 16983       | CakSNP16983    | <i>Kabuli</i>    | <i>Ca_Kabuli_denovo</i>      | 122839                         | (T/G)       |
| 16984       | CakSNP16984    | <i>Kabuli</i>    | <i>Ca_Kabuli_denovo</i>      | 124009                         | (G/T)       |
| 16985       | CakSNP16985    | <i>Kabuli</i>    | <i>Ca_Kabuli_denovo</i>      | 124031                         | (A/G)       |
| 16986       | CakSNP16986    | <i>Kabuli</i>    | <i>Ca_Kabuli_denovo</i>      | 124227                         | (G/T)       |
| 16987       | CakSNP16987    | <i>Kabuli</i>    | <i>Ca_Kabuli_denovo</i>      | 124274                         | (G/A)       |
| 16988       | CakSNP16988    | <i>Kabuli</i>    | <i>Ca_Kabuli_denovo</i>      | 124738                         | (T/A)       |
| 16989       | CakSNP16989    | <i>Kabuli</i>    | <i>Ca_Kabuli_denovo</i>      | 124751                         | (T/A)       |
| 16990       | CakSNP16990    | <i>Kabuli</i>    | <i>Ca_Kabuli_denovo</i>      | 124772                         | (C/G)       |
| 16991       | CakSNP16991    | <i>Kabuli</i>    | <i>Ca_Kabuli_denovo</i>      | 124780                         | (A/G)       |
| 16992       | CakSNP16992    | <i>Kabuli</i>    | <i>Ca_Kabuli_denovo</i>      | 125616                         | (A/G)       |
| 16993       | CakSNP16993    | <i>Kabuli</i>    | <i>Ca_Kabuli_denovo</i>      | 125617                         | (T/G)       |
| 16994       | CakSNP16994    | <i>Kabuli</i>    | <i>Ca_Kabuli_denovo</i>      | 125618                         | (T/C)       |
| 16995       | CakSNP16995    | <i>Kabuli</i>    | <i>Ca_Kabuli_denovo</i>      | 127024                         | (A/G)       |
| 16996       | CakSNP16996    | <i>Kabuli</i>    | <i>Ca_Kabuli_denovo</i>      | 127401                         | (T/G)       |
| 16997       | CakSNP16997    | <i>Kabuli</i>    | <i>Ca_Kabuli_denovo</i>      | 127409                         | (G/T)       |
| 16998       | CakSNP16998    | <i>Kabuli</i>    | <i>Ca_Kabuli_denovo</i>      | 127410                         | (G/T)       |
| 16999       | CakSNP16999    | <i>Kabuli</i>    | <i>Ca_Kabuli_denovo</i>      | 127411                         | (G/C)       |
| 17000       | CakSNP17000    | <i>Kabuli</i>    | <i>Ca_Kabuli_denovo</i>      | 127493                         | (A/G)       |
| 17001       | CakSNP17001    | <i>Kabuli</i>    | <i>Ca_Kabuli_denovo</i>      | 127494                         | (A/G)       |
| 17002       | CakSNP17002    | <i>Kabuli</i>    | <i>Ca_Kabuli_denovo</i>      | 129540                         | (A/C)       |

| <b>S.N.</b> | <b>SNP IDs</b> | <b>Cultivars</b> | <b>Chromosomes/scaffolds</b> | <b>Physical positions (bp)</b> | <b>SNPs</b> |
|-------------|----------------|------------------|------------------------------|--------------------------------|-------------|
| 17003       | CakSNP17003    | <i>Kabuli</i>    | <i>Ca_Kabuli_denovo</i>      | 129899                         | (T/G)       |
| 17004       | CakSNP17004    | <i>Kabuli</i>    | <i>Ca_Kabuli_denovo</i>      | 129902                         | (A/C)       |
| 17005       | CakSNP17005    | <i>Kabuli</i>    | <i>Ca_Kabuli_denovo</i>      | 129903                         | (G/A)       |
| 17006       | CakSNP17006    | <i>Kabuli</i>    | <i>Ca_Kabuli_denovo</i>      | 129904                         | (C/G)       |
| 17007       | CakSNP17007    | <i>Kabuli</i>    | <i>Ca_Kabuli_denovo</i>      | 129905                         | (C/A)       |
| 17008       | CakSNP17008    | <i>Kabuli</i>    | <i>Ca_Kabuli_denovo</i>      | 129906                         | (A/G)       |
| 17009       | CakSNP17009    | <i>Kabuli</i>    | <i>Ca_Kabuli_denovo</i>      | 129908                         | (G/A)       |
| 17010       | CakSNP17010    | <i>Kabuli</i>    | <i>Ca_Kabuli_denovo</i>      | 130839                         | (A/C)       |
| 17011       | CakSNP17011    | <i>Kabuli</i>    | <i>Ca_Kabuli_denovo</i>      | 130840                         | (T/G)       |
| 17012       | CakSNP17012    | <i>Kabuli</i>    | <i>Ca_Kabuli_denovo</i>      | 130841                         | (G/A)       |
| 17013       | CakSNP17013    | <i>Kabuli</i>    | <i>Ca_Kabuli_denovo</i>      | 130842                         | (C/T)       |
| 17014       | CakSNP17014    | <i>Kabuli</i>    | <i>Ca_Kabuli_denovo</i>      | 133633                         | (A/G)       |
| 17015       | CakSNP17015    | <i>Kabuli</i>    | <i>Ca_Kabuli_denovo</i>      | 133634                         | (A/G)       |
| 17016       | CakSNP17016    | <i>Kabuli</i>    | <i>Ca_Kabuli_denovo</i>      | 136132                         | (G/A)       |
| 17017       | CakSNP17017    | <i>Kabuli</i>    | <i>Ca_Kabuli_denovo</i>      | 136134                         | (G/A)       |
| 17018       | CakSNP17018    | <i>Kabuli</i>    | <i>Ca_Kabuli_denovo</i>      | 138972                         | (A/G)       |
| 17019       | CakSNP17019    | <i>Kabuli</i>    | <i>Ca_Kabuli_denovo</i>      | 139763                         | (T/G)       |
| 17020       | CakSNP17020    | <i>Kabuli</i>    | <i>Ca_Kabuli_denovo</i>      | 139764                         | (G/C)       |
| 17021       | CakSNP17021    | <i>Kabuli</i>    | <i>Ca_Kabuli_denovo</i>      | 140441                         | (G/T)       |
| 17022       | CakSNP17022    | <i>Kabuli</i>    | <i>Ca_Kabuli_denovo</i>      | 140457                         | (T/G)       |
| 17023       | CakSNP17023    | <i>Kabuli</i>    | <i>Ca_Kabuli_denovo</i>      | 140481                         | (A/G)       |
| 17024       | CakSNP17024    | <i>Kabuli</i>    | <i>Ca_Kabuli_denovo</i>      | 143491                         | (C/G)       |
| 17025       | CakSNP17025    | <i>Kabuli</i>    | <i>Ca_Kabuli_denovo</i>      | 143493                         | (T/G)       |
| 17026       | CakSNP17026    | <i>Kabuli</i>    | <i>Ca_Kabuli_denovo</i>      | 143495                         | (C/T)       |
| 17027       | CakSNP17027    | <i>Kabuli</i>    | <i>Ca_Kabuli_denovo</i>      | 143496                         | (A/C)       |
| 17028       | CakSNP17028    | <i>Kabuli</i>    | <i>Ca_Kabuli_denovo</i>      | 143497                         | (G/A)       |
| 17029       | CakSNP17029    | <i>Kabuli</i>    | <i>Ca_Kabuli_denovo</i>      | 146274                         | (G/A)       |
| 17030       | CakSNP17030    | <i>Kabuli</i>    | <i>Ca_Kabuli_denovo</i>      | 146364                         | (A/G)       |
| 17031       | CakSNP17031    | <i>Kabuli</i>    | <i>Ca_Kabuli_denovo</i>      | 146747                         | (A/G)       |
| 17032       | CakSNP17032    | <i>Kabuli</i>    | <i>Ca_Kabuli_denovo</i>      | 146749                         | (G/A)       |
| 17033       | CakSNP17033    | <i>Kabuli</i>    | <i>Ca_Kabuli_denovo</i>      | 146751                         | (T/A)       |
| 17034       | CakSNP17034    | <i>Kabuli</i>    | <i>Ca_Kabuli_denovo</i>      | 146753                         | (C/G)       |
| 17035       | CakSNP17035    | <i>Kabuli</i>    | <i>Ca_Kabuli_denovo</i>      | 146755                         | (G/C)       |
| 17036       | CakSNP17036    | <i>Kabuli</i>    | <i>Ca_Kabuli_denovo</i>      | 147027                         | (A/G)       |
| 17037       | CakSNP17037    | <i>Kabuli</i>    | <i>Ca_Kabuli_denovo</i>      | 147029                         | (A/G)       |
| 17038       | CakSNP17038    | <i>Kabuli</i>    | <i>Ca_Kabuli_denovo</i>      | 147031                         | (A/T)       |
| 17039       | CakSNP17039    | <i>Kabuli</i>    | <i>Ca_Kabuli_denovo</i>      | 147032                         | (G/T)       |
| 17040       | CakSNP17040    | <i>Kabuli</i>    | <i>Ca_Kabuli_denovo</i>      | 147033                         | (C/G)       |
| 17041       | CakSNP17041    | <i>Kabuli</i>    | <i>Ca_Kabuli_denovo</i>      | 149439                         | (A/C)       |

| <b>S.N.</b> | <b>SNP IDs</b> | <b>Cultivars</b> | <b>Chromosomes/scaffolds</b> | <b>Physical positions (bp)</b> | <b>SNPs</b> |
|-------------|----------------|------------------|------------------------------|--------------------------------|-------------|
| 17042       | CakSNP17042    | <i>Kabuli</i>    | <i>Ca_Kabuli_denovo</i>      | 149440                         | (G/T)       |
| 17043       | CakSNP17043    | <i>Kabuli</i>    | <i>Ca_Kabuli_denovo</i>      | 149628                         | (C/G)       |
| 17044       | CakSNP17044    | <i>Kabuli</i>    | <i>Ca_Kabuli_denovo</i>      | 149629                         | (C/A)       |
| 17045       | CakSNP17045    | <i>Kabuli</i>    | <i>Ca_Kabuli_denovo</i>      | 149632                         | (C/G)       |
| 17046       | CakSNP17046    | <i>Kabuli</i>    | <i>Ca_Kabuli_denovo</i>      | 149809                         | (A/G)       |
| 17047       | CakSNP17047    | <i>Kabuli</i>    | <i>Ca_Kabuli_denovo</i>      | 149811                         | (A/G)       |
| 17048       | CakSNP17048    | <i>Kabuli</i>    | <i>Ca_Kabuli_denovo</i>      | 149813                         | (T/A)       |
| 17049       | CakSNP17049    | <i>Kabuli</i>    | <i>Ca_Kabuli_denovo</i>      | 150092                         | (A/G)       |
| 17050       | CakSNP17050    | <i>Kabuli</i>    | <i>Ca_Kabuli_denovo</i>      | 150094                         | (G/A)       |
| 17051       | CakSNP17051    | <i>Kabuli</i>    | <i>Ca_Kabuli_denovo</i>      | 150096                         | (T/A)       |
| 17052       | CakSNP17052    | <i>Kabuli</i>    | <i>Ca_Kabuli_denovo</i>      | 150097                         | (G/T)       |
| 17053       | CakSNP17053    | <i>Kabuli</i>    | <i>Ca_Kabuli_denovo</i>      | 150098                         | (C/G)       |
| 17054       | CakSNP17054    | <i>Kabuli</i>    | <i>Ca_Kabuli_denovo</i>      | 150669                         | (A/G)       |
| 17055       | CakSNP17055    | <i>Kabuli</i>    | <i>Ca_Kabuli_denovo</i>      | 150688                         | (T/G)       |
| 17056       | CakSNP17056    | <i>Kabuli</i>    | <i>Ca_Kabuli_denovo</i>      | 150703                         | (A/G)       |
| 17057       | CakSNP17057    | <i>Kabuli</i>    | <i>Ca_Kabuli_denovo</i>      | 150706                         | (T/A)       |
| 17058       | CakSNP17058    | <i>Kabuli</i>    | <i>Ca_Kabuli_denovo</i>      | 150720                         | (A/G)       |
| 17059       | CakSNP17059    | <i>Kabuli</i>    | <i>Ca_Kabuli_denovo</i>      | 150730                         | (A/G)       |
| 17060       | CakSNP17060    | <i>Kabuli</i>    | <i>Ca_Kabuli_denovo</i>      | 150734                         | (G/A)       |
| 17061       | CakSNP17061    | <i>Kabuli</i>    | <i>Ca_Kabuli_denovo</i>      | 153852                         | (A/G)       |
| 17062       | CakSNP17062    | <i>Kabuli</i>    | <i>Ca_Kabuli_denovo</i>      | 154095                         | (C/G)       |
| 17063       | CakSNP17063    | <i>Kabuli</i>    | <i>Ca_Kabuli_denovo</i>      | 154096                         | (G/A)       |
| 17064       | CakSNP17064    | <i>Kabuli</i>    | <i>Ca_Kabuli_denovo</i>      | 154097                         | (T/A)       |
| 17065       | CakSNP17065    | <i>Kabuli</i>    | <i>Ca_Kabuli_denovo</i>      | 154098                         | (C/T)       |
| 17066       | CakSNP17066    | <i>Kabuli</i>    | <i>Ca_Kabuli_denovo</i>      | 154640                         | (G/A)       |
| 17067       | CakSNP17067    | <i>Kabuli</i>    | <i>Ca_Kabuli_denovo</i>      | 155679                         | (A/G)       |
| 17068       | CakSNP17068    | <i>Kabuli</i>    | <i>Ca_Kabuli_denovo</i>      | 155681                         | (A/G)       |
| 17069       | CakSNP17069    | <i>Kabuli</i>    | <i>Ca_Kabuli_denovo</i>      | 155683                         | (A/T)       |
| 17070       | CakSNP17070    | <i>Kabuli</i>    | <i>Ca_Kabuli_denovo</i>      | 156229                         | (A/G)       |
| 17071       | CakSNP17071    | <i>Kabuli</i>    | <i>Ca_Kabuli_denovo</i>      | 156322                         | (T/G)       |
| 17072       | CakSNP17072    | <i>Kabuli</i>    | <i>Ca_Kabuli_denovo</i>      | 156323                         | (G/A)       |
| 17073       | CakSNP17073    | <i>Kabuli</i>    | <i>Ca_Kabuli_denovo</i>      | 156324                         | (C/G)       |
| 17074       | CakSNP17074    | <i>Kabuli</i>    | <i>Ca_Kabuli_denovo</i>      | 156325                         | (A/C)       |
| 17075       | CakSNP17075    | <i>Kabuli</i>    | <i>Ca_Kabuli_denovo</i>      | 156492                         | (A/G)       |
| 17076       | CakSNP17076    | <i>Kabuli</i>    | <i>Ca_Kabuli_denovo</i>      | 156493                         | (G/A)       |
| 17077       | CakSNP17077    | <i>Kabuli</i>    | <i>Ca_Kabuli_denovo</i>      | 156494                         | (C/G)       |
| 17078       | CakSNP17078    | <i>Kabuli</i>    | <i>Ca_Kabuli_denovo</i>      | 157819                         | (C/G)       |
| 17079       | CakSNP17079    | <i>Kabuli</i>    | <i>Ca_Kabuli_denovo</i>      | 157821                         | (G/A)       |
| 17080       | CakSNP17080    | <i>Kabuli</i>    | <i>Ca_Kabuli_denovo</i>      | 157822                         | (A/G)       |

| <b>S.N.</b> | <b>SNP IDs</b> | <b>Cultivars</b> | <b>Chromosomes/scaffolds</b> | <b>Physical positions (bp)</b> | <b>SNPs</b> |
|-------------|----------------|------------------|------------------------------|--------------------------------|-------------|
| 17081       | CakSNP17081    | <i>Kabuli</i>    | <i>Ca_Kabuli_denovo</i>      | 157997                         | (G/C)       |
| 17082       | CakSNP17082    | <i>Kabuli</i>    | <i>Ca_Kabuli_denovo</i>      | 158850                         | (C/A)       |
| 17083       | CakSNP17083    | <i>Kabuli</i>    | <i>Ca_Kabuli_denovo</i>      | 159015                         | (G/A)       |
| 17084       | CakSNP17084    | <i>Kabuli</i>    | <i>Ca_Kabuli_denovo</i>      | 159016                         | (G/C)       |
| 17085       | CakSNP17085    | <i>Kabuli</i>    | <i>Ca_Kabuli_denovo</i>      | 159017                         | (A/C)       |
| 17086       | CakSNP17086    | <i>Kabuli</i>    | <i>Ca_Kabuli_denovo</i>      | 159018                         | (A/G)       |
| 17087       | CakSNP17087    | <i>Kabuli</i>    | <i>Ca_Kabuli_denovo</i>      | 159019                         | (T/A)       |
| 17088       | CakSNP17088    | <i>Kabuli</i>    | <i>Ca_Kabuli_denovo</i>      | 159020                         | (G/T)       |
| 17089       | CakSNP17089    | <i>Kabuli</i>    | <i>Ca_Kabuli_denovo</i>      | 164804                         | (T/G)       |
| 17090       | CakSNP17090    | <i>Kabuli</i>    | <i>Ca_Kabuli_denovo</i>      | 164847                         | (T/C)       |
| 17091       | CakSNP17091    | <i>Kabuli</i>    | <i>Ca_Kabuli_denovo</i>      | 164877                         | (A/G)       |
| 17092       | CakSNP17092    | <i>Kabuli</i>    | <i>Ca_Kabuli_denovo</i>      | 164886                         | (G/C)       |
| 17093       | CakSNP17093    | <i>Kabuli</i>    | <i>Ca_Kabuli_denovo</i>      | 165283                         | (C/G)       |
| 17094       | CakSNP17094    | <i>Kabuli</i>    | <i>Ca_Kabuli_denovo</i>      | 165296                         | (C/A)       |
| 17095       | CakSNP17095    | <i>Kabuli</i>    | <i>Ca_Kabuli_denovo</i>      | 165324                         | (A/G)       |
| 17096       | CakSNP17096    | <i>Kabuli</i>    | <i>Ca_Kabuli_denovo</i>      | 165355                         | (T/G)       |
| 17097       | CakSNP17097    | <i>Kabuli</i>    | <i>Ca_Kabuli_denovo</i>      | 166177                         | (A/G)       |
| 17098       | CakSNP17098    | <i>Kabuli</i>    | <i>Ca_Kabuli_denovo</i>      | 166179                         | (G/A)       |
| 17099       | CakSNP17099    | <i>Kabuli</i>    | <i>Ca_Kabuli_denovo</i>      | 166181                         | (T/A)       |
| 17100       | CakSNP17100    | <i>Kabuli</i>    | <i>Ca_Kabuli_denovo</i>      | 166736                         | (C/G)       |
| 17101       | CakSNP17101    | <i>Kabuli</i>    | <i>Ca_Kabuli_denovo</i>      | 166737                         | (A/G)       |
| 17102       | CakSNP17102    | <i>Kabuli</i>    | <i>Ca_Kabuli_denovo</i>      | 166738                         | (G/A)       |
| 17103       | CakSNP17103    | <i>Kabuli</i>    | <i>Ca_Kabuli_denovo</i>      | 166758                         | (G/C)       |
| 17104       | CakSNP17104    | <i>Kabuli</i>    | <i>Ca_Kabuli_denovo</i>      | 166767                         | (A/G)       |
| 17105       | CakSNP17105    | <i>Kabuli</i>    | <i>Ca_Kabuli_denovo</i>      | 166786                         | (A/G)       |
| 17106       | CakSNP17106    | <i>Kabuli</i>    | <i>Ca_Kabuli_denovo</i>      | 166809                         | (A/G)       |
| 17107       | CakSNP17107    | <i>Kabuli</i>    | <i>Ca_Kabuli_denovo</i>      | 166828                         | (A/C)       |
| 17108       | CakSNP17108    | <i>Kabuli</i>    | <i>Ca_Kabuli_denovo</i>      | 166836                         | (A/C)       |
| 17109       | CakSNP17109    | <i>Kabuli</i>    | <i>Ca_Kabuli_denovo</i>      | 166843                         | (G/T)       |
| 17110       | CakSNP17110    | <i>Kabuli</i>    | <i>Ca_Kabuli_denovo</i>      | 167563                         | (G/C)       |
| 17111       | CakSNP17111    | <i>Kabuli</i>    | <i>Ca_Kabuli_denovo</i>      | 167564                         | (C/A)       |
| 17112       | CakSNP17112    | <i>Kabuli</i>    | <i>Ca_Kabuli_denovo</i>      | 167565                         | (A/G)       |
| 17113       | CakSNP17113    | <i>Kabuli</i>    | <i>Ca_Kabuli_denovo</i>      | 167567                         | (A/G)       |
| 17114       | CakSNP17114    | <i>Kabuli</i>    | <i>Ca_Kabuli_denovo</i>      | 167569                         | (T/A)       |
| 17115       | CakSNP17115    | <i>Kabuli</i>    | <i>Ca_Kabuli_denovo</i>      | 169044                         | (A/G)       |
| 17116       | CakSNP17116    | <i>Kabuli</i>    | <i>Ca_Kabuli_denovo</i>      | 169046                         | (A/G)       |
| 17117       | CakSNP17117    | <i>Kabuli</i>    | <i>Ca_Kabuli_denovo</i>      | 169047                         | (G/A)       |
| 17118       | CakSNP17118    | <i>Kabuli</i>    | <i>Ca_Kabuli_denovo</i>      | 171930                         | (G/A)       |
| 17119       | CakSNP17119    | <i>Kabuli</i>    | <i>Ca_Kabuli_denovo</i>      | 171932                         | (G/A)       |



| <b>S.N.</b> | <b>SNP IDs</b> | <b>Cultivars</b> | <b>Chromosomes/scaffolds</b> | <b>Physical positions (bp)</b> | <b>SNPs</b> |
|-------------|----------------|------------------|------------------------------|--------------------------------|-------------|
| 17120       | CakSNP17120    | <i>Kabuli</i>    | <i>Ca_Kabuli_denovo</i>      | 171933                         | (A/G)       |
| 17121       | CakSNP17121    | <i>Kabuli</i>    | <i>Ca_Kabuli_denovo</i>      | 171983                         | (T/A)       |
| 17122       | CakSNP17122    | <i>Kabuli</i>    | <i>Ca_Kabuli_denovo</i>      | 171999                         | (G/T)       |
| 17123       | CakSNP17123    | <i>Kabuli</i>    | <i>Ca_Kabuli_denovo</i>      | 172017                         | (A/G)       |
| 17124       | CakSNP17124    | <i>Kabuli</i>    | <i>Ca_Kabuli_denovo</i>      | 172035                         | (T/A)       |
| 17125       | CakSNP17125    | <i>Kabuli</i>    | <i>Ca_Kabuli_denovo</i>      | 172044                         | (A/G)       |
| 17126       | CakSNP17126    | <i>Kabuli</i>    | <i>Ca_Kabuli_denovo</i>      | 173451                         | (A/G)       |
| 17127       | CakSNP17127    | <i>Kabuli</i>    | <i>Ca_Kabuli_denovo</i>      | 173462                         | (C/G)       |
| 17128       | CakSNP17128    | <i>Kabuli</i>    | <i>Ca_Kabuli_denovo</i>      | 173472                         | (C/G)       |
| 17129       | CakSNP17129    | <i>Kabuli</i>    | <i>Ca_Kabuli_denovo</i>      | 174632                         | (C/A)       |
| 17130       | CakSNP17130    | <i>Kabuli</i>    | <i>Ca_Kabuli_denovo</i>      | 174633                         | (A/G)       |
| 17131       | CakSNP17131    | <i>Kabuli</i>    | <i>Ca_Kabuli_denovo</i>      | 174635                         | (A/G)       |
| 17132       | CakSNP17132    | <i>Kabuli</i>    | <i>Ca_Kabuli_denovo</i>      | 175138                         | (C/G)       |
| 17133       | CakSNP17133    | <i>Kabuli</i>    | <i>Ca_Kabuli_denovo</i>      | 175160                         | (A/G)       |
| 17134       | CakSNP17134    | <i>Kabuli</i>    | <i>Ca_Kabuli_denovo</i>      | 175170                         | (T/G)       |
| 17135       | CakSNP17135    | <i>Kabuli</i>    | <i>Ca_Kabuli_denovo</i>      | 176799                         | (T/G)       |
| 17136       | CakSNP17136    | <i>Kabuli</i>    | <i>Ca_Kabuli_denovo</i>      | 176814                         | (T/A)       |
| 17137       | CakSNP17137    | <i>Kabuli</i>    | <i>Ca_Kabuli_denovo</i>      | 176822                         | (T/G)       |
| 17138       | CakSNP17138    | <i>Kabuli</i>    | <i>Ca_Kabuli_denovo</i>      | 176824                         | (C/G)       |
| 17139       | CakSNP17139    | <i>Kabuli</i>    | <i>Ca_Kabuli_denovo</i>      | 176831                         | (T/G)       |
| 17140       | CakSNP17140    | <i>Kabuli</i>    | <i>Ca_Kabuli_denovo</i>      | 176835                         | (T/G)       |
| 17141       | CakSNP17141    | <i>Kabuli</i>    | <i>Ca_Kabuli_denovo</i>      | 176837                         | (A/G)       |
| 17142       | CakSNP17142    | <i>Kabuli</i>    | <i>Ca_Kabuli_denovo</i>      | 176839                         | (T/G)       |
| 17143       | CakSNP17143    | <i>Kabuli</i>    | <i>Ca_Kabuli_denovo</i>      | 176874                         | (T/A)       |
| 17144       | CakSNP17144    | <i>Kabuli</i>    | <i>Ca_Kabuli_denovo</i>      | 178198                         | (T/G)       |
| 17145       | CakSNP17145    | <i>Kabuli</i>    | <i>Ca_Kabuli_denovo</i>      | 178200                         | (T/G)       |
| 17146       | CakSNP17146    | <i>Kabuli</i>    | <i>Ca_Kabuli_denovo</i>      | 178205                         | (T/G)       |
| 17147       | CakSNP17147    | <i>Kabuli</i>    | <i>Ca_Kabuli_denovo</i>      | 178212                         | (C/T)       |
| 17148       | CakSNP17148    | <i>Kabuli</i>    | <i>Ca_Kabuli_denovo</i>      | 178217                         | (T/G)       |
| 17149       | CakSNP17149    | <i>Kabuli</i>    | <i>Ca_Kabuli_denovo</i>      | 178238                         | (C/G)       |
| 17150       | CakSNP17150    | <i>Kabuli</i>    | <i>Ca_Kabuli_denovo</i>      | 178243                         | (A/G)       |
| 17151       | CakSNP17151    | <i>Kabuli</i>    | <i>Ca_Kabuli_denovo</i>      | 178249                         | (T/G)       |
| 17152       | CakSNP17152    | <i>Kabuli</i>    | <i>Ca_Kabuli_denovo</i>      | 178251                         | (T/G)       |
| 17153       | CakSNP17153    | <i>Kabuli</i>    | <i>Ca_Kabuli_denovo</i>      | 178276                         | (T/C)       |
| 17154       | CakSNP17154    | <i>Kabuli</i>    | <i>Ca_Kabuli_denovo</i>      | 178736                         | (G/A)       |
| 17155       | CakSNP17155    | <i>Kabuli</i>    | <i>Ca_Kabuli_denovo</i>      | 178737                         | (C/T)       |
| 17156       | CakSNP17156    | <i>Kabuli</i>    | <i>Ca_Kabuli_denovo</i>      | 179759                         | (C/T)       |
| 17157       | CakSNP17157    | <i>Kabuli</i>    | <i>Ca_Kabuli_denovo</i>      | 180307                         | (C/A)       |
| 17158       | CakSNP17158    | <i>Kabuli</i>    | <i>Ca_Kabuli_denovo</i>      | 180309                         | (T/G)       |

| <b>S.N.</b> | <b>SNP IDs</b> | <b>Cultivars</b> | <b>Chromosomes/scaffolds</b> | <b>Physical positions (bp)</b> | <b>SNPs</b> |
|-------------|----------------|------------------|------------------------------|--------------------------------|-------------|
| 17159       | CakSNP17159    | <i>Kabuli</i>    | <i>Ca_Kabuli_denovo</i>      | 180571                         | (G/A)       |
| 17160       | CakSNP17160    | <i>Kabuli</i>    | <i>Ca_Kabuli_denovo</i>      | 180573                         | (G/A)       |
| 17161       | CakSNP17161    | <i>Kabuli</i>    | <i>Ca_Kabuli_denovo</i>      | 180686                         | (A/G)       |
| 17162       | CakSNP17162    | <i>Kabuli</i>    | <i>Ca_Kabuli_denovo</i>      | 180689                         | (G/C)       |
| 17163       | CakSNP17163    | <i>Kabuli</i>    | <i>Ca_Kabuli_denovo</i>      | 181636                         | (T/A)       |
| 17164       | CakSNP17164    | <i>Kabuli</i>    | <i>Ca_Kabuli_denovo</i>      | 181639                         | (C/G)       |
| 17165       | CakSNP17165    | <i>Kabuli</i>    | <i>Ca_Kabuli_denovo</i>      | 181670                         | (A/G)       |
| 17166       | CakSNP17166    | <i>Kabuli</i>    | <i>Ca_Kabuli_denovo</i>      | 181675                         | (G/A)       |
| 17167       | CakSNP17167    | <i>Kabuli</i>    | <i>Ca_Kabuli_denovo</i>      | 181679                         | (G/A)       |
| 17168       | CakSNP17168    | <i>Kabuli</i>    | <i>Ca_Kabuli_denovo</i>      | 181698                         | (G/A)       |
| 17169       | CakSNP17169    | <i>Kabuli</i>    | <i>Ca_Kabuli_denovo</i>      | 181720                         | (C/G)       |
| 17170       | CakSNP17170    | <i>Kabuli</i>    | <i>Ca_Kabuli_denovo</i>      | 182277                         | (A/G)       |
| 17171       | CakSNP17171    | <i>Kabuli</i>    | <i>Ca_Kabuli_denovo</i>      | 182279                         | (A/T)       |
| 17172       | CakSNP17172    | <i>Kabuli</i>    | <i>Ca_Kabuli_denovo</i>      | 182280                         | (G/T)       |
| 17173       | CakSNP17173    | <i>Kabuli</i>    | <i>Ca_Kabuli_denovo</i>      | 182281                         | (C/G)       |
| 17174       | CakSNP17174    | <i>Kabuli</i>    | <i>Ca_Kabuli_denovo</i>      | 182628                         | (G/T)       |
| 17175       | CakSNP17175    | <i>Kabuli</i>    | <i>Ca_Kabuli_denovo</i>      | 183987                         | (G/C)       |
| 17176       | CakSNP17176    | <i>Kabuli</i>    | <i>Ca_Kabuli_denovo</i>      | 183990                         | (A/G)       |
| 17177       | CakSNP17177    | <i>Kabuli</i>    | <i>Ca_Kabuli_denovo</i>      | 184118                         | (G/C)       |
| 17178       | CakSNP17178    | <i>Kabuli</i>    | <i>Ca_Kabuli_denovo</i>      | 184181                         | (T/G)       |
| 17179       | CakSNP17179    | <i>Kabuli</i>    | <i>Ca_Kabuli_denovo</i>      | 184211                         | (T/G)       |
| 17180       | CakSNP17180    | <i>Kabuli</i>    | <i>Ca_Kabuli_denovo</i>      | 184231                         | (C/A)       |
| 17181       | CakSNP17181    | <i>Kabuli</i>    | <i>Ca_Kabuli_denovo</i>      | 184333                         | (C/G)       |
| 17182       | CakSNP17182    | <i>Kabuli</i>    | <i>Ca_Kabuli_denovo</i>      | 184359                         | (G/T)       |
| 17183       | CakSNP17183    | <i>Kabuli</i>    | <i>Ca_Kabuli_denovo</i>      | 184367                         | (T/G)       |
| 17184       | CakSNP17184    | <i>Kabuli</i>    | <i>Ca_Kabuli_denovo</i>      | 184370                         | (C/G)       |
| 17185       | CakSNP17185    | <i>Kabuli</i>    | <i>Ca_Kabuli_denovo</i>      | 184372                         | (C/G)       |
| 17186       | CakSNP17186    | <i>Kabuli</i>    | <i>Ca_Kabuli_denovo</i>      | 184427                         | (C/G)       |
| 17187       | CakSNP17187    | <i>Kabuli</i>    | <i>Ca_Kabuli_denovo</i>      | 184440                         | (C/G)       |
| 17188       | CakSNP17188    | <i>Kabuli</i>    | <i>Ca_Kabuli_denovo</i>      | 184460                         | (T/G)       |
| 17189       | CakSNP17189    | <i>Kabuli</i>    | <i>Ca_Kabuli_denovo</i>      | 184487                         | (C/A)       |
| 17190       | CakSNP17190    | <i>Kabuli</i>    | <i>Ca_Kabuli_denovo</i>      | 184509                         | (C/T)       |
| 17191       | CakSNP17191    | <i>Kabuli</i>    | <i>Ca_Kabuli_denovo</i>      | 184521                         | (T/A)       |
| 17192       | CakSNP17192    | <i>Kabuli</i>    | <i>Ca_Kabuli_denovo</i>      | 184541                         | (C/G)       |
| 17193       | CakSNP17193    | <i>Kabuli</i>    | <i>Ca_Kabuli_denovo</i>      | 184553                         | (T/G)       |
| 17194       | CakSNP17194    | <i>Kabuli</i>    | <i>Ca_Kabuli_denovo</i>      | 184583                         | (T/G)       |
| 17195       | CakSNP17195    | <i>Kabuli</i>    | <i>Ca_Kabuli_denovo</i>      | 185564                         | (C/G)       |
| 17196       | CakSNP17196    | <i>Kabuli</i>    | <i>Ca_Kabuli_denovo</i>      | 185568                         | (T/G)       |
| 17197       | CakSNP17197    | <i>Kabuli</i>    | <i>Ca_Kabuli_denovo</i>      | 185573                         | (G/A)       |

| <b>S.N.</b> | <b>SNP IDs</b> | <b>Cultivars</b> | <b>Chromosomes/scaffolds</b> | <b>Physical positions (bp)</b> | <b>SNPs</b> |
|-------------|----------------|------------------|------------------------------|--------------------------------|-------------|
| 17198       | CakSNP17198    | <i>Kabuli</i>    | <i>Ca_Kabuli_denovo</i>      | 185577                         | (T/G)       |
| 17199       | CakSNP17199    | <i>Kabuli</i>    | <i>Ca_Kabuli_denovo</i>      | 185579                         | (A/G)       |
| 17200       | CakSNP17200    | <i>Kabuli</i>    | <i>Ca_Kabuli_denovo</i>      | 185583                         | (A/G)       |
| 17201       | CakSNP17201    | <i>Kabuli</i>    | <i>Ca_Kabuli_denovo</i>      | 185634                         | (A/G)       |
| 17202       | CakSNP17202    | <i>Kabuli</i>    | <i>Ca_Kabuli_denovo</i>      | 185645                         | (C/G)       |
| 17203       | CakSNP17203    | <i>Kabuli</i>    | <i>Ca_Kabuli_denovo</i>      | 185653                         | (A/G)       |
| 17204       | CakSNP17204    | <i>Kabuli</i>    | <i>Ca_Kabuli_denovo</i>      | 185657                         | (C/G)       |
| 17205       | CakSNP17205    | <i>Kabuli</i>    | <i>Ca_Kabuli_denovo</i>      | 185669                         | (T/G)       |
| 17206       | CakSNP17206    | <i>Kabuli</i>    | <i>Ca_Kabuli_denovo</i>      | 185674                         | (C/G)       |
| 17207       | CakSNP17207    | <i>Kabuli</i>    | <i>Ca_Kabuli_denovo</i>      | 185679                         | (T/A)       |
| 17208       | CakSNP17208    | <i>Kabuli</i>    | <i>Ca_Kabuli_denovo</i>      | 185682                         | (T/G)       |
| 17209       | CakSNP17209    | <i>Kabuli</i>    | <i>Ca_Kabuli_denovo</i>      | 187188                         | (A/G)       |
| 17210       | CakSNP17210    | <i>Kabuli</i>    | <i>Ca_Kabuli_denovo</i>      | 188302                         | (G/A)       |
| 17211       | CakSNP17211    | <i>Kabuli</i>    | <i>Ca_Kabuli_denovo</i>      | 188305                         | (C/A)       |
| 17212       | CakSNP17212    | <i>Kabuli</i>    | <i>Ca_Kabuli_denovo</i>      | 188306                         | (A/G)       |
| 17213       | CakSNP17213    | <i>Kabuli</i>    | <i>Ca_Kabuli_denovo</i>      | 188308                         | (C/A)       |
| 17214       | CakSNP17214    | <i>Kabuli</i>    | <i>Ca_Kabuli_denovo</i>      | 188310                         | (G/T)       |
| 17215       | CakSNP17215    | <i>Kabuli</i>    | <i>Ca_Kabuli_denovo</i>      | 188312                         | (A/C)       |
| 17216       | CakSNP17216    | <i>Kabuli</i>    | <i>Ca_Kabuli_denovo</i>      | 188313                         | (C/A)       |
| 17217       | CakSNP17217    | <i>Kabuli</i>    | <i>Ca_Kabuli_denovo</i>      | 190388                         | (C/G)       |
| 17218       | CakSNP17218    | <i>Kabuli</i>    | <i>Ca_Kabuli_denovo</i>      | 190404                         | (C/G)       |
| 17219       | CakSNP17219    | <i>Kabuli</i>    | <i>Ca_Kabuli_denovo</i>      | 194914                         | (A/G)       |
| 17220       | CakSNP17220    | <i>Kabuli</i>    | <i>Ca_Kabuli_denovo</i>      | 194915                         | (C/G)       |
| 17221       | CakSNP17221    | <i>Kabuli</i>    | <i>Ca_Kabuli_denovo</i>      | 195589                         | (A/G)       |
| 17222       | CakSNP17222    | <i>Kabuli</i>    | <i>Ca_Kabuli_denovo</i>      | 195605                         | (C/G)       |
| 17223       | CakSNP17223    | <i>Kabuli</i>    | <i>Ca_Kabuli_denovo</i>      | 195642                         | (C/G)       |
| 17224       | CakSNP17224    | <i>Kabuli</i>    | <i>Ca_Kabuli_denovo</i>      | 195663                         | (T/A)       |
| 17225       | CakSNP17225    | <i>Kabuli</i>    | <i>Ca_Kabuli_denovo</i>      | 195669                         | (T/G)       |
| 17226       | CakSNP17226    | <i>Kabuli</i>    | <i>Ca_Kabuli_denovo</i>      | 196773                         | (C/G)       |
| 17227       | CakSNP17227    | <i>Kabuli</i>    | <i>Ca_Kabuli_denovo</i>      | 196775                         | (T/G)       |
| 17228       | CakSNP17228    | <i>Kabuli</i>    | <i>Ca_Kabuli_denovo</i>      | 196777                         | (C/T)       |
| 17229       | CakSNP17229    | <i>Kabuli</i>    | <i>Ca_Kabuli_denovo</i>      | 197792                         | (A/G)       |
| 17230       | CakSNP17230    | <i>Kabuli</i>    | <i>Ca_Kabuli_denovo</i>      | 197793                         | (G/C)       |
| 17231       | CakSNP17231    | <i>Kabuli</i>    | <i>Ca_Kabuli_denovo</i>      | 197795                         | (A/G)       |
| 17232       | CakSNP17232    | <i>Kabuli</i>    | <i>Ca_Kabuli_denovo</i>      | 197796                         | (G/A)       |
| 17233       | CakSNP17233    | <i>Kabuli</i>    | <i>Ca_Kabuli_denovo</i>      | 197799                         | (C/A)       |
| 17234       | CakSNP17234    | <i>Kabuli</i>    | <i>Ca_Kabuli_denovo</i>      | 197800                         | (C/T)       |
| 17235       | CakSNP17235    | <i>Kabuli</i>    | <i>Ca_Kabuli_denovo</i>      | 197802                         | (A/C)       |
| 17236       | CakSNP17236    | <i>Kabuli</i>    | <i>Ca_Kabuli_denovo</i>      | 197991                         | (C/G)       |

| <b>S.N.</b> | <b>SNP IDs</b> | <b>Cultivars</b> | <b>Chromosomes/scaffolds</b> | <b>Physical positions (bp)</b> | <b>SNPs</b> |
|-------------|----------------|------------------|------------------------------|--------------------------------|-------------|
| 17237       | CakSNP17237    | <i>Kabuli</i>    | <i>Ca_Kabuli_denovo</i>      | 197992                         | (G/A)       |
| 17238       | CakSNP17238    | <i>Kabuli</i>    | <i>Ca_Kabuli_denovo</i>      | 197993                         | (A/T)       |
| 17239       | CakSNP17239    | <i>Kabuli</i>    | <i>Ca_Kabuli_denovo</i>      | 197994                         | (C/T)       |
| 17240       | CakSNP17240    | <i>Kabuli</i>    | <i>Ca_Kabuli_denovo</i>      | 197995                         | (T/C)       |
| 17241       | CakSNP17241    | <i>Kabuli</i>    | <i>Ca_Kabuli_denovo</i>      | 197996                         | (C/T)       |
| 17242       | CakSNP17242    | <i>Kabuli</i>    | <i>Ca_Kabuli_denovo</i>      | 198162                         | (T/G)       |
| 17243       | CakSNP17243    | <i>Kabuli</i>    | <i>Ca_Kabuli_denovo</i>      | 198166                         | (C/G)       |
| 17244       | CakSNP17244    | <i>Kabuli</i>    | <i>Ca_Kabuli_denovo</i>      | 198168                         | (A/G)       |
| 17245       | CakSNP17245    | <i>Kabuli</i>    | <i>Ca_Kabuli_denovo</i>      | 198170                         | (G/A)       |
| 17246       | CakSNP17246    | <i>Kabuli</i>    | <i>Ca_Kabuli_denovo</i>      | 198171                         | (C/A)       |
| 17247       | CakSNP17247    | <i>Kabuli</i>    | <i>Ca_Kabuli_denovo</i>      | 198358                         | (T/G)       |
| 17248       | CakSNP17248    | <i>Kabuli</i>    | <i>Ca_Kabuli_denovo</i>      | 198365                         | (A/G)       |
| 17249       | CakSNP17249    | <i>Kabuli</i>    | <i>Ca_Kabuli_denovo</i>      | 198366                         | (C/A)       |
| 17250       | CakSNP17250    | <i>Kabuli</i>    | <i>Ca_Kabuli_denovo</i>      | 198367                         | (C/T)       |
| 17251       | CakSNP17251    | <i>Kabuli</i>    | <i>Ca_Kabuli_denovo</i>      | 198370                         | (C/T)       |
| 17252       | CakSNP17252    | <i>Kabuli</i>    | <i>Ca_Kabuli_denovo</i>      | 198431                         | (G/A)       |
| 17253       | CakSNP17253    | <i>Kabuli</i>    | <i>Ca_Kabuli_denovo</i>      | 198433                         | (A/G)       |
| 17254       | CakSNP17254    | <i>Kabuli</i>    | <i>Ca_Kabuli_denovo</i>      | 198434                         | (G/A)       |
| 17255       | CakSNP17255    | <i>Kabuli</i>    | <i>Ca_Kabuli_denovo</i>      | 198435                         | (A/G)       |
| 17256       | CakSNP17256    | <i>Kabuli</i>    | <i>Ca_Kabuli_denovo</i>      | 198436                         | (G/C)       |
| 17257       | CakSNP17257    | <i>Kabuli</i>    | <i>Ca_Kabuli_denovo</i>      | 198437                         | (C/G)       |
| 17258       | CakSNP17258    | <i>Kabuli</i>    | <i>Ca_Kabuli_denovo</i>      | 198439                         | (G/T)       |
| 17259       | CakSNP17259    | <i>Kabuli</i>    | <i>Ca_Kabuli_denovo</i>      | 198441                         | (T/C)       |
| 17260       | CakSNP17260    | <i>Kabuli</i>    | <i>Ca_Kabuli_denovo</i>      | 198442                         | (C/A)       |
| 17261       | CakSNP17261    | <i>Kabuli</i>    | <i>Ca_Kabuli_denovo</i>      | 198443                         | (A/G)       |
| 17262       | CakSNP17262    | <i>Kabuli</i>    | <i>Ca_Kabuli_denovo</i>      | 198444                         | (G/C)       |
| 17263       | CakSNP17263    | <i>Kabuli</i>    | <i>Ca_Kabuli_denovo</i>      | 198445                         | (C/A)       |
| 17264       | CakSNP17264    | <i>Kabuli</i>    | <i>Ca_Kabuli_denovo</i>      | 198446                         | (A/G)       |
| 17265       | CakSNP17265    | <i>Kabuli</i>    | <i>Ca_Kabuli_denovo</i>      | 198448                         | (G/A)       |
| 17266       | CakSNP17266    | <i>Kabuli</i>    | <i>Ca_Kabuli_denovo</i>      | 198450                         | (A/T)       |
| 17267       | CakSNP17267    | <i>Kabuli</i>    | <i>Ca_Kabuli_denovo</i>      | 198451                         | (T/G)       |
| 17268       | CakSNP17268    | <i>Kabuli</i>    | <i>Ca_Kabuli_denovo</i>      | 198452                         | (G/C)       |
| 17269       | CakSNP17269    | <i>Kabuli</i>    | <i>Ca_Kabuli_denovo</i>      | 198454                         | (C/G)       |
| 17270       | CakSNP17270    | <i>Kabuli</i>    | <i>Ca_Kabuli_denovo</i>      | 198455                         | (G/A)       |
| 17271       | CakSNP17271    | <i>Kabuli</i>    | <i>Ca_Kabuli_denovo</i>      | 198456                         | (A/G)       |
| 17272       | CakSNP17272    | <i>Kabuli</i>    | <i>Ca_Kabuli_denovo</i>      | 198457                         | (G/A)       |
| 17273       | CakSNP17273    | <i>Kabuli</i>    | <i>Ca_Kabuli_denovo</i>      | 198458                         | (A/C)       |
| 17274       | CakSNP17274    | <i>Kabuli</i>    | <i>Ca_Kabuli_denovo</i>      | 198842                         | (T/G)       |
| 17275       | CakSNP17275    | <i>Kabuli</i>    | <i>Ca_Kabuli_denovo</i>      | 199140                         | (C/A)       |

| <b>S.N.</b> | <b>SNP IDs</b> | <b>Cultivars</b> | <b>Chromosomes/scaffolds</b> | <b>Physical positions (bp)</b> | <b>SNPs</b> |
|-------------|----------------|------------------|------------------------------|--------------------------------|-------------|
| 17276       | CakSNP17276    | <i>Kabuli</i>    | <i>Ca_Kabuli_denovo</i>      | 199240                         | (T/C)       |
| 17277       | CakSNP17277    | <i>Kabuli</i>    | <i>Ca_Kabuli_denovo</i>      | 199747                         | (C/G)       |
| 17278       | CakSNP17278    | <i>Kabuli</i>    | <i>Ca_Kabuli_denovo</i>      | 200458                         | (A/G)       |
| 17279       | CakSNP17279    | <i>Kabuli</i>    | <i>Ca_Kabuli_denovo</i>      | 200459                         | (T/G)       |
| 17280       | CakSNP17280    | <i>Kabuli</i>    | <i>Ca_Kabuli_denovo</i>      | 200728                         | (T/C)       |
| 17281       | CakSNP17281    | <i>Kabuli</i>    | <i>Ca_Kabuli_denovo</i>      | 200743                         | (C/G)       |
| 17282       | CakSNP17282    | <i>Kabuli</i>    | <i>Ca_Kabuli_denovo</i>      | 200890                         | (T/A)       |
| 17283       | CakSNP17283    | <i>Kabuli</i>    | <i>Ca_Kabuli_denovo</i>      | 200910                         | (G/A)       |
| 17284       | CakSNP17284    | <i>Kabuli</i>    | <i>Ca_Kabuli_denovo</i>      | 201180                         | (G/T)       |
| 17285       | CakSNP17285    | <i>Kabuli</i>    | <i>Ca_Kabuli_denovo</i>      | 201201                         | (A/G)       |
| 17286       | CakSNP17286    | <i>Kabuli</i>    | <i>Ca_Kabuli_denovo</i>      | 201287                         | (A/C)       |
| 17287       | CakSNP17287    | <i>Kabuli</i>    | <i>Ca_Kabuli_denovo</i>      | 201365                         | (A/T)       |
| 17288       | CakSNP17288    | <i>Kabuli</i>    | <i>Ca_Kabuli_denovo</i>      | 201444                         | (T/G)       |
| 17289       | CakSNP17289    | <i>Kabuli</i>    | <i>Ca_Kabuli_denovo</i>      | 201979                         | (G/A)       |
| 17290       | CakSNP17290    | <i>Kabuli</i>    | <i>Ca_Kabuli_denovo</i>      | 201981                         | (G/A)       |
| 17291       | CakSNP17291    | <i>Kabuli</i>    | <i>Ca_Kabuli_denovo</i>      | 201982                         | (A/G)       |
| 17292       | CakSNP17292    | <i>Kabuli</i>    | <i>Ca_Kabuli_denovo</i>      | 202419                         | (T/G)       |
| 17293       | CakSNP17293    | <i>Kabuli</i>    | <i>Ca_Kabuli_denovo</i>      | 202456                         | (T/G)       |
| 17294       | CakSNP17294    | <i>Kabuli</i>    | <i>Ca_Kabuli_denovo</i>      | 202459                         | (C/T)       |
| 17295       | CakSNP17295    | <i>Kabuli</i>    | <i>Ca_Kabuli_denovo</i>      | 202460                         | (G/C)       |
| 17296       | CakSNP17296    | <i>Kabuli</i>    | <i>Ca_Kabuli_denovo</i>      | 202461                         | (T/G)       |
| 17297       | CakSNP17297    | <i>Kabuli</i>    | <i>Ca_Kabuli_denovo</i>      | 202523                         | (G/A)       |
| 17298       | CakSNP17298    | <i>Kabuli</i>    | <i>Ca_Kabuli_denovo</i>      | 202525                         | (A/G)       |
| 17299       | CakSNP17299    | <i>Kabuli</i>    | <i>Ca_Kabuli_denovo</i>      | 202526                         | (G/A)       |
| 17300       | CakSNP17300    | <i>Kabuli</i>    | <i>Ca_Kabuli_denovo</i>      | 202527                         | (A/G)       |
| 17301       | CakSNP17301    | <i>Kabuli</i>    | <i>Ca_Kabuli_denovo</i>      | 202529                         | (C/G)       |
| 17302       | CakSNP17302    | <i>Kabuli</i>    | <i>Ca_Kabuli_denovo</i>      | 202531                         | (G/T)       |
| 17303       | CakSNP17303    | <i>Kabuli</i>    | <i>Ca_Kabuli_denovo</i>      | 202533                         | (T/C)       |
| 17304       | CakSNP17304    | <i>Kabuli</i>    | <i>Ca_Kabuli_denovo</i>      | 202534                         | (C/A)       |
| 17305       | CakSNP17305    | <i>Kabuli</i>    | <i>Ca_Kabuli_denovo</i>      | 202535                         | (A/G)       |
| 17306       | CakSNP17306    | <i>Kabuli</i>    | <i>Ca_Kabuli_denovo</i>      | 202536                         | (G/C)       |
| 17307       | CakSNP17307    | <i>Kabuli</i>    | <i>Ca_Kabuli_denovo</i>      | 202537                         | (C/A)       |
| 17308       | CakSNP17308    | <i>Kabuli</i>    | <i>Ca_Kabuli_denovo</i>      | 202538                         | (A/G)       |
| 17309       | CakSNP17309    | <i>Kabuli</i>    | <i>Ca_Kabuli_denovo</i>      | 202540                         | (G/A)       |
| 17310       | CakSNP17310    | <i>Kabuli</i>    | <i>Ca_Kabuli_denovo</i>      | 202542                         | (A/T)       |
| 17311       | CakSNP17311    | <i>Kabuli</i>    | <i>Ca_Kabuli_denovo</i>      | 202544                         | (G/C)       |
| 17312       | CakSNP17312    | <i>Kabuli</i>    | <i>Ca_Kabuli_denovo</i>      | 202546                         | (C/G)       |
| 17313       | CakSNP17313    | <i>Kabuli</i>    | <i>Ca_Kabuli_denovo</i>      | 202547                         | (G/A)       |
| 17314       | CakSNP17314    | <i>Kabuli</i>    | <i>Ca_Kabuli_denovo</i>      | 202548                         | (A/G)       |

| <b>S.N.</b> | <b>SNP IDs</b> | <b>Cultivars</b> | <b>Chromosomes/scaffolds</b> | <b>Physical positions (bp)</b> | <b>SNPs</b> |
|-------------|----------------|------------------|------------------------------|--------------------------------|-------------|
| 17315       | CakSNP17315    | <i>Kabuli</i>    | <i>Ca_Kabuli_denovo</i>      | 202549                         | (G/A)       |
| 17316       | CakSNP17316    | <i>Kabuli</i>    | <i>Ca_Kabuli_denovo</i>      | 202550                         | (A/T)       |
| 17317       | CakSNP17317    | <i>Kabuli</i>    | <i>Ca_Kabuli_denovo</i>      | 202551                         | (C/A)       |
| 17318       | CakSNP17318    | <i>Kabuli</i>    | <i>Ca_Kabuli_denovo</i>      | 202553                         | (C/G)       |
| 17319       | CakSNP17319    | <i>Kabuli</i>    | <i>Ca_Kabuli_denovo</i>      | 204292                         | (A/G)       |
| 17320       | CakSNP17320    | <i>Kabuli</i>    | <i>Ca_Kabuli_denovo</i>      | 204293                         | (G/C)       |
| 17321       | CakSNP17321    | <i>Kabuli</i>    | <i>Ca_Kabuli_denovo</i>      | 207676                         | (T/A)       |
| 17322       | CakSNP17322    | <i>Kabuli</i>    | <i>Ca_Kabuli_denovo</i>      | 207681                         | (T/G)       |
| 17323       | CakSNP17323    | <i>Kabuli</i>    | <i>Ca_Kabuli_denovo</i>      | 207690                         | (C/G)       |
| 17324       | CakSNP17324    | <i>Kabuli</i>    | <i>Ca_Kabuli_denovo</i>      | 207698                         | (A/G)       |
| 17325       | CakSNP17325    | <i>Kabuli</i>    | <i>Ca_Kabuli_denovo</i>      | 207703                         | (T/A)       |
| 17326       | CakSNP17326    | <i>Kabuli</i>    | <i>Ca_Kabuli_denovo</i>      | 207712                         | (C/G)       |
| 17327       | CakSNP17327    | <i>Kabuli</i>    | <i>Ca_Kabuli_denovo</i>      | 207716                         | (C/G)       |
| 17328       | CakSNP17328    | <i>Kabuli</i>    | <i>Ca_Kabuli_denovo</i>      | 207737                         | (T/G)       |
| 17329       | CakSNP17329    | <i>Kabuli</i>    | <i>Ca_Kabuli_denovo</i>      | 208035                         | (G/A)       |
| 17330       | CakSNP17330    | <i>Kabuli</i>    | <i>Ca_Kabuli_denovo</i>      | 208036                         | (A/T)       |
| 17331       | CakSNP17331    | <i>Kabuli</i>    | <i>Ca_Kabuli_denovo</i>      | 208037                         | (C/T)       |
| 17332       | CakSNP17332    | <i>Kabuli</i>    | <i>Ca_Kabuli_denovo</i>      | 208042                         | (A/T)       |
| 17333       | CakSNP17333    | <i>Kabuli</i>    | <i>Ca_Kabuli_denovo</i>      | 209330                         | (A/G)       |
| 17334       | CakSNP17334    | <i>Kabuli</i>    | <i>Ca_Kabuli_denovo</i>      | 209332                         | (C/T)       |
| 17335       | CakSNP17335    | <i>Kabuli</i>    | <i>Ca_Kabuli_denovo</i>      | 209333                         | (C/G)       |
| 17336       | CakSNP17336    | <i>Kabuli</i>    | <i>Ca_Kabuli_denovo</i>      | 209334                         | (G/C)       |
| 17337       | CakSNP17337    | <i>Kabuli</i>    | <i>Ca_Kabuli_denovo</i>      | 210208                         | (A/T)       |
| 17338       | CakSNP17338    | <i>Kabuli</i>    | <i>Ca_Kabuli_denovo</i>      | 210216                         | (T/C)       |
| 17339       | CakSNP17339    | <i>Kabuli</i>    | <i>Ca_Kabuli_denovo</i>      | 210225                         | (G/A)       |
| 17340       | CakSNP17340    | <i>Kabuli</i>    | <i>Ca_Kabuli_denovo</i>      | 210237                         | (A/T)       |
| 17341       | CakSNP17341    | <i>Kabuli</i>    | <i>Ca_Kabuli_denovo</i>      | 215170                         | (G/A)       |
| 17342       | CakSNP17342    | <i>Kabuli</i>    | <i>Ca_Kabuli_denovo</i>      | 215678                         | (T/G)       |
| 17343       | CakSNP17343    | <i>Kabuli</i>    | <i>Ca_Kabuli_denovo</i>      | 215689                         | (C/A)       |
| 17344       | CakSNP17344    | <i>Kabuli</i>    | <i>Ca_Kabuli_denovo</i>      | 215699                         | (A/G)       |
| 17345       | CakSNP17345    | <i>Kabuli</i>    | <i>Ca_Kabuli_denovo</i>      | 215705                         | (T/G)       |
| 17346       | CakSNP17346    | <i>Kabuli</i>    | <i>Ca_Kabuli_denovo</i>      | 215723                         | (A/G)       |
| 17347       | CakSNP17347    | <i>Kabuli</i>    | <i>Ca_Kabuli_denovo</i>      | 215731                         | (C/G)       |
| 17348       | CakSNP17348    | <i>Kabuli</i>    | <i>Ca_Kabuli_denovo</i>      | 215752                         | (G/A)       |
| 17349       | CakSNP17349    | <i>Kabuli</i>    | <i>Ca_Kabuli_denovo</i>      | 215757                         | (G/T)       |
| 17350       | CakSNP17350    | <i>Kabuli</i>    | <i>Ca_Kabuli_denovo</i>      | 217228                         | (C/A)       |
| 17351       | CakSNP17351    | <i>Kabuli</i>    | <i>Ca_Kabuli_denovo</i>      | 217229                         | (A/T)       |
| 17352       | CakSNP17352    | <i>Kabuli</i>    | <i>Ca_Kabuli_denovo</i>      | 217232                         | (C/A)       |
| 17353       | CakSNP17353    | <i>Kabuli</i>    | <i>Ca_Kabuli_denovo</i>      | 220674                         | (C/G)       |

| <b>S.N.</b> | <b>SNP IDs</b> | <b>Cultivars</b> | <b>Chromosomes/scaffolds</b> | <b>Physical positions (bp)</b> | <b>SNPs</b> |
|-------------|----------------|------------------|------------------------------|--------------------------------|-------------|
| 17354       | CakSNP17354    | <i>Kabuli</i>    | <i>Ca_Kabuli_denovo</i>      | 220676                         | (T/G)       |
| 17355       | CakSNP17355    | <i>Kabuli</i>    | <i>Ca_Kabuli_denovo</i>      | 220678                         | (C/T)       |
| 17356       | CakSNP17356    | <i>Kabuli</i>    | <i>Ca_Kabuli_denovo</i>      | 220679                         | (A/C)       |
| 17357       | CakSNP17357    | <i>Kabuli</i>    | <i>Ca_Kabuli_denovo</i>      | 222258                         | (C/G)       |
| 17358       | CakSNP17358    | <i>Kabuli</i>    | <i>Ca_Kabuli_denovo</i>      | 222260                         | (T/G)       |
| 17359       | CakSNP17359    | <i>Kabuli</i>    | <i>Ca_Kabuli_denovo</i>      | 222262                         | (C/T)       |
| 17360       | CakSNP17360    | <i>Kabuli</i>    | <i>Ca_Kabuli_denovo</i>      | 223208                         | (C/A)       |
| 17361       | CakSNP17361    | <i>Kabuli</i>    | <i>Ca_Kabuli_denovo</i>      | 223209                         | (T/A)       |
| 17362       | CakSNP17362    | <i>Kabuli</i>    | <i>Ca_Kabuli_denovo</i>      | 223211                         | (C/G)       |
| 17363       | CakSNP17363    | <i>Kabuli</i>    | <i>Ca_Kabuli_denovo</i>      | 223224                         | (G/A)       |
| 17364       | CakSNP17364    | <i>Kabuli</i>    | <i>Ca_Kabuli_denovo</i>      | 223241                         | (T/G)       |
| 17365       | CakSNP17365    | <i>Kabuli</i>    | <i>Ca_Kabuli_denovo</i>      | 223243                         | (A/G)       |
| 17366       | CakSNP17366    | <i>Kabuli</i>    | <i>Ca_Kabuli_denovo</i>      | 223248                         | (A/C)       |
| 17367       | CakSNP17367    | <i>Kabuli</i>    | <i>Ca_Kabuli_denovo</i>      | 223251                         | (T/G)       |
| 17368       | CakSNP17368    | <i>Kabuli</i>    | <i>Ca_Kabuli_denovo</i>      | 223258                         | (A/G)       |
| 17369       | CakSNP17369    | <i>Kabuli</i>    | <i>Ca_Kabuli_denovo</i>      | 223261                         | (G/A)       |
| 17370       | CakSNP17370    | <i>Kabuli</i>    | <i>Ca_Kabuli_denovo</i>      | 224544                         | (T/C)       |
| 17371       | CakSNP17371    | <i>Kabuli</i>    | <i>Ca_Kabuli_denovo</i>      | 224555                         | (G/A)       |
| 17372       | CakSNP17372    | <i>Kabuli</i>    | <i>Ca_Kabuli_denovo</i>      | 224557                         | (T/C)       |
| 17373       | CakSNP17373    | <i>Kabuli</i>    | <i>Ca_Kabuli_denovo</i>      | 224865                         | (C/A)       |
| 17374       | CakSNP17374    | <i>Kabuli</i>    | <i>Ca_Kabuli_denovo</i>      | 224867                         | (C/G)       |
| 17375       | CakSNP17375    | <i>Kabuli</i>    | <i>Ca_Kabuli_denovo</i>      | 224868                         | (G/A)       |
| 17376       | CakSNP17376    | <i>Kabuli</i>    | <i>Ca_Kabuli_denovo</i>      | 225042                         | (A/G)       |
| 17377       | CakSNP17377    | <i>Kabuli</i>    | <i>Ca_Kabuli_denovo</i>      | 225043                         | (A/G)       |
| 17378       | CakSNP17378    | <i>Kabuli</i>    | <i>Ca_Kabuli_denovo</i>      | 225408                         | (A/C)       |
| 17379       | CakSNP17379    | <i>Kabuli</i>    | <i>Ca_Kabuli_denovo</i>      | 225409                         | (C/A)       |
| 17380       | CakSNP17380    | <i>Kabuli</i>    | <i>Ca_Kabuli_denovo</i>      | 225414                         | (T/A)       |
| 17381       | CakSNP17381    | <i>Kabuli</i>    | <i>Ca_Kabuli_denovo</i>      | 225417                         | (G/T)       |
| 17382       | CakSNP17382    | <i>Kabuli</i>    | <i>Ca_Kabuli_denovo</i>      | 225422                         | (G/C)       |
| 17383       | CakSNP17383    | <i>Kabuli</i>    | <i>Ca_Kabuli_denovo</i>      | 225425                         | (T/G)       |
| 17384       | CakSNP17384    | <i>Kabuli</i>    | <i>Ca_Kabuli_denovo</i>      | 230711                         | (G/T)       |
| 17385       | CakSNP17385    | <i>Kabuli</i>    | <i>Ca_Kabuli_denovo</i>      | 230712                         | (C/T)       |
| 17386       | CakSNP17386    | <i>Kabuli</i>    | <i>Ca_Kabuli_denovo</i>      | 232397                         | (G/C)       |
| 17387       | CakSNP17387    | <i>Kabuli</i>    | <i>Ca_Kabuli_denovo</i>      | 232398                         | (C/G)       |
| 17388       | CakSNP17388    | <i>Kabuli</i>    | <i>Ca_Kabuli_denovo</i>      | 232399                         | (C/A)       |
| 17389       | CakSNP17389    | <i>Kabuli</i>    | <i>Ca_Kabuli_denovo</i>      | 232400                         | (T/G)       |
| 17390       | CakSNP17390    | <i>Kabuli</i>    | <i>Ca_Kabuli_denovo</i>      | 232401                         | (C/A)       |
| 17391       | CakSNP17391    | <i>Kabuli</i>    | <i>Ca_Kabuli_denovo</i>      | 235464                         | (C/A)       |
| 17392       | CakSNP17392    | <i>Kabuli</i>    | <i>Ca_Kabuli_denovo</i>      | 238447                         | (A/G)       |

| <b>S.N.</b> | <b>SNP IDs</b> | <b>Cultivars</b> | <b>Chromosomes/scaffolds</b> | <b>Physical positions (bp)</b> | <b>SNPs</b> |
|-------------|----------------|------------------|------------------------------|--------------------------------|-------------|
| 17393       | CakSNP17393    | <i>Kabuli</i>    | <i>Ca_Kabuli_denovo</i>      | 238449                         | (A/G)       |
| 17394       | CakSNP17394    | <i>Kabuli</i>    | <i>Ca_Kabuli_denovo</i>      | 238451                         | (T/A)       |
| 17395       | CakSNP17395    | <i>Kabuli</i>    | <i>Ca_Kabuli_denovo</i>      | 238452                         | (G/T)       |
| 17396       | CakSNP17396    | <i>Kabuli</i>    | <i>Ca_Kabuli_denovo</i>      | 239728                         | (G/T)       |
| 17397       | CakSNP17397    | <i>Kabuli</i>    | <i>Ca_Kabuli_denovo</i>      | 240943                         | (C/T)       |
| 17398       | CakSNP17398    | <i>Kabuli</i>    | <i>Ca_Kabuli_denovo</i>      | 248697                         | (A/C)       |
| 17399       | CakSNP17399    | <i>Kabuli</i>    | <i>Ca_Kabuli_denovo</i>      | 248719                         | (T/C)       |
| 17400       | CakSNP17400    | <i>Kabuli</i>    | <i>Ca_Kabuli_denovo</i>      | 248775                         | (T/G)       |
| 17401       | CakSNP17401    | <i>Kabuli</i>    | <i>Ca_Kabuli_denovo</i>      | 256228                         | (A/G)       |
| 17402       | CakSNP17402    | <i>Kabuli</i>    | <i>Ca_Kabuli_denovo</i>      | 256262                         | (T/G)       |
| 17403       | CakSNP17403    | <i>Kabuli</i>    | <i>Ca_Kabuli_denovo</i>      | 256272                         | (G/A)       |
| 17404       | CakSNP17404    | <i>Kabuli</i>    | <i>Ca_Kabuli_denovo</i>      | 264802                         | (G/C)       |
| 17405       | CakSNP17405    | <i>Kabuli</i>    | <i>Ca_Kabuli_denovo</i>      | 264812                         | (T/G)       |
| 17406       | CakSNP17406    | <i>Kabuli</i>    | <i>Ca_Kabuli_denovo</i>      | 264815                         | (C/G)       |
| 17407       | CakSNP17407    | <i>Kabuli</i>    | <i>Ca_Kabuli_denovo</i>      | 264817                         | (G/C)       |
| 17408       | CakSNP17408    | <i>Kabuli</i>    | <i>Ca_Kabuli_denovo</i>      | 264819                         | (A/G)       |
| 17409       | CakSNP17409    | <i>Kabuli</i>    | <i>Ca_Kabuli_denovo</i>      | 265972                         | (A/G)       |
| 17410       | CakSNP17410    | <i>Kabuli</i>    | <i>Ca_Kabuli_denovo</i>      | 268126                         | (G/T)       |
| 17411       | CakSNP17411    | <i>Kabuli</i>    | <i>Ca_Kabuli_denovo</i>      | 268171                         | (T/C)       |
| 17412       | CakSNP17412    | <i>Kabuli</i>    | <i>Ca_Kabuli_denovo</i>      | 273531                         | (A/G)       |
| 17413       | CakSNP17413    | <i>Kabuli</i>    | <i>Ca_Kabuli_denovo</i>      | 273541                         | (C/G)       |
| 17414       | CakSNP17414    | <i>Kabuli</i>    | <i>Ca_Kabuli_denovo</i>      | 273543                         | (G/C)       |
| 17415       | CakSNP17415    | <i>Kabuli</i>    | <i>Ca_Kabuli_denovo</i>      | 275658                         | (T/G)       |
| 17416       | CakSNP17416    | <i>Kabuli</i>    | <i>Ca_Kabuli_denovo</i>      | 275671                         | (A/G)       |
| 17417       | CakSNP17417    | <i>Kabuli</i>    | <i>Ca_Kabuli_denovo</i>      | 275698                         | (T/G)       |
| 17418       | CakSNP17418    | <i>Kabuli</i>    | <i>Ca_Kabuli_denovo</i>      | 281765                         | (C/G)       |
| 17419       | CakSNP17419    | <i>Kabuli</i>    | <i>Ca_Kabuli_denovo</i>      | 281766                         | (G/C)       |
| 17420       | CakSNP17420    | <i>Kabuli</i>    | <i>Ca_Kabuli_denovo</i>      | 281767                         | (G/A)       |
| 17421       | CakSNP17421    | <i>Kabuli</i>    | <i>Ca_Kabuli_denovo</i>      | 281768                         | (T/G)       |
| 17422       | CakSNP17422    | <i>Kabuli</i>    | <i>Ca_Kabuli_denovo</i>      | 281769                         | (T/G)       |
| 17423       | CakSNP17423    | <i>Kabuli</i>    | <i>Ca_Kabuli_denovo</i>      | 281770                         | (A/C)       |
| 17424       | CakSNP17424    | <i>Kabuli</i>    | <i>Ca_Kabuli_denovo</i>      | 290341                         | (T/A)       |
| 17425       | CakSNP17425    | <i>Kabuli</i>    | <i>Ca_Kabuli_denovo</i>      | 290342                         | (T/G)       |
| 17426       | CakSNP17426    | <i>Kabuli</i>    | <i>Ca_Kabuli_denovo</i>      | 290344                         | (C/T)       |
| 17427       | CakSNP17427    | <i>Kabuli</i>    | <i>Ca_Kabuli_denovo</i>      | 290345                         | (G/T)       |
| 17428       | CakSNP17428    | <i>Kabuli</i>    | <i>Ca_Kabuli_denovo</i>      | 299355                         | (A/T)       |
| 17429       | CakSNP17429    | <i>Kabuli</i>    | <i>Ca_Kabuli_denovo</i>      | 299356                         | (C/T)       |
| 17430       | CakSNP17430    | <i>Kabuli</i>    | <i>Ca_Kabuli_denovo</i>      | 300954                         | (A/G)       |
| 17431       | CakSNP17431    | <i>Kabuli</i>    | <i>Ca_Kabuli_denovo</i>      | 300963                         | (A/G)       |



| <b>S.N.</b> | <b>SNP IDs</b> | <b>Cultivars</b> | <b>Chromosomes/scaffolds</b> | <b>Physical positions (bp)</b> | <b>SNPs</b> |
|-------------|----------------|------------------|------------------------------|--------------------------------|-------------|
| 17432       | CakSNP17432    | <i>Kabuli</i>    | <i>Ca_Kabuli_denovo</i>      | 300979                         | (A/G)       |
| 17433       | CakSNP17433    | <i>Kabuli</i>    | <i>Ca_Kabuli_denovo</i>      | 300980                         | (T/G)       |
| 17434       | CakSNP17434    | <i>Kabuli</i>    | <i>Ca_Kabuli_denovo</i>      | 300982                         | (T/G)       |
| 17435       | CakSNP17435    | <i>Kabuli</i>    | <i>Ca_Kabuli_denovo</i>      | 300994                         | (A/G)       |
| 17436       | CakSNP17436    | <i>Kabuli</i>    | <i>Ca_Kabuli_denovo</i>      | 301008                         | (A/G)       |
| 17437       | CakSNP17437    | <i>Kabuli</i>    | <i>Ca_Kabuli_denovo</i>      | 301011                         | (C/G)       |
| 17438       | CakSNP17438    | <i>Kabuli</i>    | <i>Ca_Kabuli_denovo</i>      | 301012                         | (C/G)       |
| 17439       | CakSNP17439    | <i>Kabuli</i>    | <i>Ca_Kabuli_denovo</i>      | 301021                         | (A/G)       |
| 17440       | CakSNP17440    | <i>Kabuli</i>    | <i>Ca_Kabuli_denovo</i>      | 301027                         | (A/G)       |
| 17441       | CakSNP17441    | <i>Kabuli</i>    | <i>Ca_Kabuli_denovo</i>      | 301037                         | (A/G)       |
| 17442       | CakSNP17442    | <i>Kabuli</i>    | <i>Ca_Kabuli_denovo</i>      | 305833                         | (T/G)       |
| 17443       | CakSNP17443    | <i>Kabuli</i>    | <i>Ca_Kabuli_denovo</i>      | 309250                         | (C/G)       |
| 17444       | CakSNP17444    | <i>Kabuli</i>    | <i>Ca_Kabuli_denovo</i>      | 309283                         | (A/G)       |
| 17445       | CakSNP17445    | <i>Kabuli</i>    | <i>Ca_Kabuli_denovo</i>      | 309293                         | (C/G)       |
| 17446       | CakSNP17446    | <i>Kabuli</i>    | <i>Ca_Kabuli_denovo</i>      | 312821                         | (A/G)       |
| 17447       | CakSNP17447    | <i>Kabuli</i>    | <i>Ca_Kabuli_denovo</i>      | 313026                         | (T/G)       |
| 17448       | CakSNP17448    | <i>Kabuli</i>    | <i>Ca_Kabuli_denovo</i>      | 313030                         | (G/C)       |
| 17449       | CakSNP17449    | <i>Kabuli</i>    | <i>Ca_Kabuli_denovo</i>      | 313032                         | (A/G)       |
| 17450       | CakSNP17450    | <i>Kabuli</i>    | <i>Ca_Kabuli_denovo</i>      | 313033                         | (T/G)       |
| 17451       | CakSNP17451    | <i>Kabuli</i>    | <i>Ca_Kabuli_denovo</i>      | 313034                         | (G/A)       |
| 17452       | CakSNP17452    | <i>Kabuli</i>    | <i>Ca_Kabuli_denovo</i>      | 315534                         | (G/C)       |
| 17453       | CakSNP17453    | <i>Kabuli</i>    | <i>Ca_Kabuli_denovo</i>      | 315535                         | (C/G)       |
| 17454       | CakSNP17454    | <i>Kabuli</i>    | <i>Ca_Kabuli_denovo</i>      | 316184                         | (G/C)       |
| 17455       | CakSNP17455    | <i>Kabuli</i>    | <i>Ca_Kabuli_denovo</i>      | 319444                         | (A/G)       |
| 17456       | CakSNP17456    | <i>Kabuli</i>    | <i>Ca_Kabuli_denovo</i>      | 324057                         | (T/G)       |
| 17457       | CakSNP17457    | <i>Kabuli</i>    | <i>Ca_Kabuli_denovo</i>      | 325498                         | (A/G)       |
| 17458       | CakSNP17458    | <i>Kabuli</i>    | <i>Ca_Kabuli_denovo</i>      | 325500                         | (G/A)       |
| 17459       | CakSNP17459    | <i>Kabuli</i>    | <i>Ca_Kabuli_denovo</i>      | 327160                         | (G/A)       |
| 17460       | CakSNP17460    | <i>Kabuli</i>    | <i>Ca_Kabuli_denovo</i>      | 327161                         | (A/T)       |
| 17461       | CakSNP17461    | <i>Kabuli</i>    | <i>Ca_Kabuli_denovo</i>      | 327162                         | (G/A)       |
| 17462       | CakSNP17462    | <i>Kabuli</i>    | <i>Ca_Kabuli_denovo</i>      | 328553                         | (A/G)       |
| 17463       | CakSNP17463    | <i>Kabuli</i>    | <i>Ca_Kabuli_denovo</i>      | 328554                         | (A/G)       |
| 17464       | CakSNP17464    | <i>Kabuli</i>    | <i>Ca_Kabuli_denovo</i>      | 328555                         | (G/T)       |
| 17465       | CakSNP17465    | <i>Kabuli</i>    | <i>Ca_Kabuli_denovo</i>      | 328556                         | (A/C)       |
| 17466       | CakSNP17466    | <i>Kabuli</i>    | <i>Ca_Kabuli_denovo</i>      | 328867                         | (G/A)       |
| 17467       | CakSNP17467    | <i>Kabuli</i>    | <i>Ca_Kabuli_denovo</i>      | 328887                         | (A/G)       |
| 17468       | CakSNP17468    | <i>Kabuli</i>    | <i>Ca_Kabuli_denovo</i>      | 328899                         | (A/C)       |
| 17469       | CakSNP17469    | <i>Kabuli</i>    | <i>Ca_Kabuli_denovo</i>      | 328908                         | (C/A)       |
| 17470       | CakSNP17470    | <i>Kabuli</i>    | <i>Ca_Kabuli_denovo</i>      | 329973                         | (C/A)       |

| <b>S.N.</b> | <b>SNP IDs</b> | <b>Cultivars</b> | <b>Chromosomes/scaffolds</b> | <b>Physical positions (bp)</b> | <b>SNPs</b> |
|-------------|----------------|------------------|------------------------------|--------------------------------|-------------|
| 17471       | CakSNP17471    | <i>Kabuli</i>    | <i>Ca_Kabuli_denovo</i>      | 329977                         | (A/G)       |
| 17472       | CakSNP17472    | <i>Kabuli</i>    | <i>Ca_Kabuli_denovo</i>      | 329986                         | (A/G)       |
| 17473       | CakSNP17473    | <i>Kabuli</i>    | <i>Ca_Kabuli_denovo</i>      | 329993                         | (T/G)       |
| 17474       | CakSNP17474    | <i>Kabuli</i>    | <i>Ca_Kabuli_denovo</i>      | 329999                         | (G/A)       |
| 17475       | CakSNP17475    | <i>Kabuli</i>    | <i>Ca_Kabuli_denovo</i>      | 330000                         | (A/G)       |
| 17476       | CakSNP17476    | <i>Kabuli</i>    | <i>Ca_Kabuli_denovo</i>      | 332747                         | (G/T)       |
| 17477       | CakSNP17477    | <i>Kabuli</i>    | <i>Ca_Kabuli_denovo</i>      | 332748                         | (A/C)       |
| 17478       | CakSNP17478    | <i>Kabuli</i>    | <i>Ca_Kabuli_denovo</i>      | 332751                         | (G/C)       |
| 17479       | CakSNP17479    | <i>Kabuli</i>    | <i>Ca_Kabuli_denovo</i>      | 332755                         | (G/C)       |
| 17480       | CakSNP17480    | <i>Kabuli</i>    | <i>Ca_Kabuli_denovo</i>      | 337250                         | (T/C)       |
| 17481       | CakSNP17481    | <i>Kabuli</i>    | <i>Ca_Kabuli_denovo</i>      | 337257                         | (T/G)       |
| 17482       | CakSNP17482    | <i>Kabuli</i>    | <i>Ca_Kabuli_denovo</i>      | 337269                         | (T/G)       |
| 17483       | CakSNP17483    | <i>Kabuli</i>    | <i>Ca_Kabuli_denovo</i>      | 337289                         | (T/G)       |
| 17484       | CakSNP17484    | <i>Kabuli</i>    | <i>Ca_Kabuli_denovo</i>      | 337405                         | (T/C)       |
| 17485       | CakSNP17485    | <i>Kabuli</i>    | <i>Ca_Kabuli_denovo</i>      | 341733                         | (T/G)       |
| 17486       | CakSNP17486    | <i>Kabuli</i>    | <i>Ca_Kabuli_denovo</i>      | 341774                         | (A/G)       |
| 17487       | CakSNP17487    | <i>Kabuli</i>    | <i>Ca_Kabuli_denovo</i>      | 348683                         | (C/A)       |
| 17488       | CakSNP17488    | <i>Kabuli</i>    | <i>Ca_Kabuli_denovo</i>      | 348717                         | (C/G)       |
| 17489       | CakSNP17489    | <i>Kabuli</i>    | <i>Ca_Kabuli_denovo</i>      | 352430                         | (T/G)       |
| 17490       | CakSNP17490    | <i>Kabuli</i>    | <i>Ca_Kabuli_denovo</i>      | 352452                         | (T/G)       |
| 17491       | CakSNP17491    | <i>Kabuli</i>    | <i>Ca_Kabuli_denovo</i>      | 352471                         | (C/A)       |
| 17492       | CakSNP17492    | <i>Kabuli</i>    | <i>Ca_Kabuli_denovo</i>      | 356259                         | (G/A)       |
| 17493       | CakSNP17493    | <i>Kabuli</i>    | <i>Ca_Kabuli_denovo</i>      | 356260                         | (G/A)       |
| 17494       | CakSNP17494    | <i>Kabuli</i>    | <i>Ca_Kabuli_denovo</i>      | 356262                         | (T/G)       |
| 17495       | CakSNP17495    | <i>Kabuli</i>    | <i>Ca_Kabuli_denovo</i>      | 356264                         | (A/C)       |
| 17496       | CakSNP17496    | <i>Kabuli</i>    | <i>Ca_Kabuli_denovo</i>      | 356266                         | (A/C)       |
| 17497       | CakSNP17497    | <i>Kabuli</i>    | <i>Ca_Kabuli_denovo</i>      | 356835                         | (G/A)       |
| 17498       | CakSNP17498    | <i>Kabuli</i>    | <i>Ca_Kabuli_denovo</i>      | 356836                         | (T/A)       |
| 17499       | CakSNP17499    | <i>Kabuli</i>    | <i>Ca_Kabuli_denovo</i>      | 357513                         | (C/A)       |
| 17500       | CakSNP17500    | <i>Kabuli</i>    | <i>Ca_Kabuli_denovo</i>      | 357533                         | (T/G)       |
| 17501       | CakSNP17501    | <i>Kabuli</i>    | <i>Ca_Kabuli_denovo</i>      | 357578                         | (G/C)       |
| 17502       | CakSNP17502    | <i>Kabuli</i>    | <i>Ca_Kabuli_denovo</i>      | 357580                         | (G/A)       |
| 17503       | CakSNP17503    | <i>Kabuli</i>    | <i>Ca_Kabuli_denovo</i>      | 357581                         | (A/T)       |
| 17504       | CakSNP17504    | <i>Kabuli</i>    | <i>Ca_Kabuli_denovo</i>      | 357582                         | (C/A)       |
| 17505       | CakSNP17505    | <i>Kabuli</i>    | <i>Ca_Kabuli_denovo</i>      | 357583                         | (T/C)       |
| 17506       | CakSNP17506    | <i>Kabuli</i>    | <i>Ca_Kabuli_denovo</i>      | 357584                         | (C/G)       |
| 17507       | CakSNP17507    | <i>Kabuli</i>    | <i>Ca_Kabuli_denovo</i>      | 357585                         | (G/T)       |
| 17508       | CakSNP17508    | <i>Kabuli</i>    | <i>Ca_Kabuli_denovo</i>      | 357586                         | (T/C)       |
| 17509       | CakSNP17509    | <i>Kabuli</i>    | <i>Ca_Kabuli_denovo</i>      | 358284                         | (T/G)       |

| <b>S.N.</b> | <b>SNP IDs</b> | <b>Cultivars</b> | <b>Chromosomes/scaffolds</b> | <b>Physical positions (bp)</b> | <b>SNPs</b> |
|-------------|----------------|------------------|------------------------------|--------------------------------|-------------|
| 17510       | CakSNP17510    | <i>Kabuli</i>    | <i>Ca_Kabuli_denovo</i>      | 358878                         | (C/G)       |
| 17511       | CakSNP17511    | <i>Kabuli</i>    | <i>Ca_Kabuli_denovo</i>      | 358879                         | (A/C)       |
| 17512       | CakSNP17512    | <i>Kabuli</i>    | <i>Ca_Kabuli_denovo</i>      | 358882                         | (C/G)       |
| 17513       | CakSNP17513    | <i>Kabuli</i>    | <i>Ca_Kabuli_denovo</i>      | 359691                         | (C/G)       |
| 17514       | CakSNP17514    | <i>Kabuli</i>    | <i>Ca_Kabuli_denovo</i>      | 359693                         | (G/A)       |
| 17515       | CakSNP17515    | <i>Kabuli</i>    | <i>Ca_Kabuli_denovo</i>      | 359695                         | (A/G)       |
| 17516       | CakSNP17516    | <i>Kabuli</i>    | <i>Ca_Kabuli_denovo</i>      | 359696                         | (G/A)       |
| 17517       | CakSNP17517    | <i>Kabuli</i>    | <i>Ca_Kabuli_denovo</i>      | 359697                         | (A/G)       |
| 17518       | CakSNP17518    | <i>Kabuli</i>    | <i>Ca_Kabuli_denovo</i>      | 359698                         | (G/C)       |
| 17519       | CakSNP17519    | <i>Kabuli</i>    | <i>Ca_Kabuli_denovo</i>      | 359699                         | (C/G)       |
| 17520       | CakSNP17520    | <i>Kabuli</i>    | <i>Ca_Kabuli_denovo</i>      | 359701                         | (G/T)       |
| 17521       | CakSNP17521    | <i>Kabuli</i>    | <i>Ca_Kabuli_denovo</i>      | 359703                         | (T/C)       |
| 17522       | CakSNP17522    | <i>Kabuli</i>    | <i>Ca_Kabuli_denovo</i>      | 359704                         | (C/A)       |
| 17523       | CakSNP17523    | <i>Kabuli</i>    | <i>Ca_Kabuli_denovo</i>      | 359705                         | (A/G)       |
| 17524       | CakSNP17524    | <i>Kabuli</i>    | <i>Ca_Kabuli_denovo</i>      | 359706                         | (G/C)       |
| 17525       | CakSNP17525    | <i>Kabuli</i>    | <i>Ca_Kabuli_denovo</i>      | 359707                         | (C/A)       |
| 17526       | CakSNP17526    | <i>Kabuli</i>    | <i>Ca_Kabuli_denovo</i>      | 359708                         | (A/G)       |
| 17527       | CakSNP17527    | <i>Kabuli</i>    | <i>Ca_Kabuli_denovo</i>      | 359710                         | (G/A)       |
| 17528       | CakSNP17528    | <i>Kabuli</i>    | <i>Ca_Kabuli_denovo</i>      | 359712                         | (A/T)       |
| 17529       | CakSNP17529    | <i>Kabuli</i>    | <i>Ca_Kabuli_denovo</i>      | 359713                         | (T/G)       |
| 17530       | CakSNP17530    | <i>Kabuli</i>    | <i>Ca_Kabuli_denovo</i>      | 359714                         | (G/C)       |
| 17531       | CakSNP17531    | <i>Kabuli</i>    | <i>Ca_Kabuli_denovo</i>      | 359716                         | (C/G)       |
| 17532       | CakSNP17532    | <i>Kabuli</i>    | <i>Ca_Kabuli_denovo</i>      | 359717                         | (G/A)       |
| 17533       | CakSNP17533    | <i>Kabuli</i>    | <i>Ca_Kabuli_denovo</i>      | 359718                         | (A/G)       |
| 17534       | CakSNP17534    | <i>Kabuli</i>    | <i>Ca_Kabuli_denovo</i>      | 359719                         | (G/A)       |
| 17535       | CakSNP17535    | <i>Kabuli</i>    | <i>Ca_Kabuli_denovo</i>      | 359720                         | (A/C)       |
| 17536       | CakSNP17536    | <i>Kabuli</i>    | <i>Ca_Kabuli_denovo</i>      | 359722                         | (C/G)       |
| 17537       | CakSNP17537    | <i>Kabuli</i>    | <i>Ca_Kabuli_denovo</i>      | 359724                         | (G/T)       |
| 17538       | CakSNP17538    | <i>Kabuli</i>    | <i>Ca_Kabuli_denovo</i>      | 359725                         | (A/C)       |
| 17539       | CakSNP17539    | <i>Kabuli</i>    | <i>Ca_Kabuli_denovo</i>      | 364778                         | (T/G)       |
| 17540       | CakSNP17540    | <i>Kabuli</i>    | <i>Ca_Kabuli_denovo</i>      | 364839                         | (A/C)       |
| 17541       | CakSNP17541    | <i>Kabuli</i>    | <i>Ca_Kabuli_denovo</i>      | 366496                         | (A/G)       |
| 17542       | CakSNP17542    | <i>Kabuli</i>    | <i>Ca_Kabuli_denovo</i>      | 366498                         | (C/A)       |
| 17543       | CakSNP17543    | <i>Kabuli</i>    | <i>Ca_Kabuli_denovo</i>      | 369650                         | (A/G)       |
| 17544       | CakSNP17544    | <i>Kabuli</i>    | <i>Ca_Kabuli_denovo</i>      | 375270                         | (G/A)       |
| 17545       | CakSNP17545    | <i>Kabuli</i>    | <i>Ca_Kabuli_denovo</i>      | 375282                         | (T/G)       |
| 17546       | CakSNP17546    | <i>Kabuli</i>    | <i>Ca_Kabuli_denovo</i>      | 381255                         | (T/G)       |
| 17547       | CakSNP17547    | <i>Kabuli</i>    | <i>Ca_Kabuli_denovo</i>      | 381258                         | (T/G)       |
| 17548       | CakSNP17548    | <i>Kabuli</i>    | <i>Ca_Kabuli_denovo</i>      | 381275                         | (T/G)       |

| <b>S.N.</b> | <b>SNP IDs</b> | <b>Cultivars</b> | <b>Chromosomes/scaffolds</b> | <b>Physical positions (bp)</b> | <b>SNPs</b> |
|-------------|----------------|------------------|------------------------------|--------------------------------|-------------|
| 17549       | CakSNP17549    | <i>Kabuli</i>    | <i>Ca_Kabuli_denovo</i>      | 382497                         | (G/A)       |
| 17550       | CakSNP17550    | <i>Kabuli</i>    | <i>Ca_Kabuli_denovo</i>      | 386867                         | (G/C)       |
| 17551       | CakSNP17551    | <i>Kabuli</i>    | <i>Ca_Kabuli_denovo</i>      | 386970                         | (G/C)       |
| 17552       | CakSNP17552    | <i>Kabuli</i>    | <i>Ca_Kabuli_denovo</i>      | 389031                         | (T/G)       |
| 17553       | CakSNP17553    | <i>Kabuli</i>    | <i>Ca_Kabuli_denovo</i>      | 389037                         | (A/G)       |
| 17554       | CakSNP17554    | <i>Kabuli</i>    | <i>Ca_Kabuli_denovo</i>      | 389049                         | (C/G)       |
| 17555       | CakSNP17555    | <i>Kabuli</i>    | <i>Ca_Kabuli_denovo</i>      | 389058                         | (T/G)       |
| 17556       | CakSNP17556    | <i>Kabuli</i>    | <i>Ca_Kabuli_denovo</i>      | 389063                         | (T/G)       |
| 17557       | CakSNP17557    | <i>Kabuli</i>    | <i>Ca_Kabuli_denovo</i>      | 389071                         | (C/G)       |
| 17558       | CakSNP17558    | <i>Kabuli</i>    | <i>Ca_Kabuli_denovo</i>      | 389076                         | (A/G)       |
| 17559       | CakSNP17559    | <i>Kabuli</i>    | <i>Ca_Kabuli_denovo</i>      | 389084                         | (C/G)       |
| 17560       | CakSNP17560    | <i>Kabuli</i>    | <i>Ca_Kabuli_denovo</i>      | 392493                         | (T/G)       |
| 17561       | CakSNP17561    | <i>Kabuli</i>    | <i>Ca_Kabuli_denovo</i>      | 396462                         | (A/T)       |
| 17562       | CakSNP17562    | <i>Kabuli</i>    | <i>Ca_Kabuli_denovo</i>      | 396485                         | (T/G)       |
| 17563       | CakSNP17563    | <i>Kabuli</i>    | <i>Ca_Kabuli_denovo</i>      | 396487                         | (T/G)       |
| 17564       | CakSNP17564    | <i>Kabuli</i>    | <i>Ca_Kabuli_denovo</i>      | 396520                         | (T/G)       |
| 17565       | CakSNP17565    | <i>Kabuli</i>    | <i>Ca_Kabuli_denovo</i>      | 396522                         | (T/G)       |
| 17566       | CakSNP17566    | <i>Kabuli</i>    | <i>Ca_Kabuli_denovo</i>      | 396537                         | (T/A)       |
| 17567       | CakSNP17567    | <i>Kabuli</i>    | <i>Ca_Kabuli_denovo</i>      | 401937                         | (C/G)       |
| 17568       | CakSNP17568    | <i>Kabuli</i>    | <i>Ca_Kabuli_denovo</i>      | 401939                         | (C/G)       |
| 17569       | CakSNP17569    | <i>Kabuli</i>    | <i>Ca_Kabuli_denovo</i>      | 401940                         | (G/A)       |
| 17570       | CakSNP17570    | <i>Kabuli</i>    | <i>Ca_Kabuli_denovo</i>      | 401941                         | (A/G)       |
| 17571       | CakSNP17571    | <i>Kabuli</i>    | <i>Ca_Kabuli_denovo</i>      | 405694                         | (G/C)       |
| 17572       | CakSNP17572    | <i>Kabuli</i>    | <i>Ca_Kabuli_denovo</i>      | 408057                         | (A/G)       |
| 17573       | CakSNP17573    | <i>Kabuli</i>    | <i>Ca_Kabuli_denovo</i>      | 408058                         | (T/G)       |
| 17574       | CakSNP17574    | <i>Kabuli</i>    | <i>Ca_Kabuli_denovo</i>      | 408059                         | (T/C)       |
| 17575       | CakSNP17575    | <i>Kabuli</i>    | <i>Ca_Kabuli_denovo</i>      | 408060                         | (C/G)       |
| 17576       | CakSNP17576    | <i>Kabuli</i>    | <i>Ca_Kabuli_denovo</i>      | 409398                         | (A/G)       |
| 17577       | CakSNP17577    | <i>Kabuli</i>    | <i>Ca_Kabuli_denovo</i>      | 409408                         | (C/G)       |
| 17578       | CakSNP17578    | <i>Kabuli</i>    | <i>Ca_Kabuli_denovo</i>      | 409485                         | (A/G)       |
| 17579       | CakSNP17579    | <i>Kabuli</i>    | <i>Ca_Kabuli_denovo</i>      | 409491                         | (A/G)       |
| 17580       | CakSNP17580    | <i>Kabuli</i>    | <i>Ca_Kabuli_denovo</i>      | 409503                         | (A/G)       |
| 17581       | CakSNP17581    | <i>Kabuli</i>    | <i>Ca_Kabuli_denovo</i>      | 409516                         | (C/A)       |
| 17582       | CakSNP17582    | <i>Kabuli</i>    | <i>Ca_Kabuli_denovo</i>      | 409517                         | (C/G)       |
| 17583       | CakSNP17583    | <i>Kabuli</i>    | <i>Ca_Kabuli_denovo</i>      | 409538                         | (T/G)       |
| 17584       | CakSNP17584    | <i>Kabuli</i>    | <i>Ca_Kabuli_denovo</i>      | 412542                         | (A/G)       |
| 17585       | CakSNP17585    | <i>Kabuli</i>    | <i>Ca_Kabuli_denovo</i>      | 412543                         | (G/C)       |
| 17586       | CakSNP17586    | <i>Kabuli</i>    | <i>Ca_Kabuli_denovo</i>      | 412544                         | (A/C)       |
| 17587       | CakSNP17587    | <i>Kabuli</i>    | <i>Ca_Kabuli_denovo</i>      | 412545                         | (G/A)       |

| <b>S.N.</b> | <b>SNP IDs</b> | <b>Cultivars</b> | <b>Chromosomes/scaffolds</b> | <b>Physical positions (bp)</b> | <b>SNPs</b> |
|-------------|----------------|------------------|------------------------------|--------------------------------|-------------|
| 17588       | CakSNP17588    | <i>Kabuli</i>    | <i>Ca_Kabuli_denovo</i>      | 416852                         | (C/G)       |
| 17589       | CakSNP17589    | <i>Kabuli</i>    | <i>Ca_Kabuli_denovo</i>      | 416855                         | (T/G)       |
| 17590       | CakSNP17590    | <i>Kabuli</i>    | <i>Ca_Kabuli_denovo</i>      | 416876                         | (T/G)       |
| 17591       | CakSNP17591    | <i>Kabuli</i>    | <i>Ca_Kabuli_denovo</i>      | 416887                         | (A/G)       |
| 17592       | CakSNP17592    | <i>Kabuli</i>    | <i>Ca_Kabuli_denovo</i>      | 416915                         | (A/G)       |
| 17593       | CakSNP17593    | <i>Kabuli</i>    | <i>Ca_Kabuli_denovo</i>      | 416999                         | (A/T)       |
| 17594       | CakSNP17594    | <i>Kabuli</i>    | <i>Ca_Kabuli_denovo</i>      | 417000                         | (A/C)       |
| 17595       | CakSNP17595    | <i>Kabuli</i>    | <i>Ca_Kabuli_denovo</i>      | 420045                         | (A/G)       |
| 17596       | CakSNP17596    | <i>Kabuli</i>    | <i>Ca_Kabuli_denovo</i>      | 420049                         | (A/G)       |
| 17597       | CakSNP17597    | <i>Kabuli</i>    | <i>Ca_Kabuli_denovo</i>      | 420278                         | (A/G)       |
| 17598       | CakSNP17598    | <i>Kabuli</i>    | <i>Ca_Kabuli_denovo</i>      | 420290                         | (C/G)       |
| 17599       | CakSNP17599    | <i>Kabuli</i>    | <i>Ca_Kabuli_denovo</i>      | 420297                         | (C/G)       |
| 17600       | CakSNP17600    | <i>Kabuli</i>    | <i>Ca_Kabuli_denovo</i>      | 420313                         | (A/G)       |
| 17601       | CakSNP17601    | <i>Kabuli</i>    | <i>Ca_Kabuli_denovo</i>      | 420318                         | (C/G)       |
| 17602       | CakSNP17602    | <i>Kabuli</i>    | <i>Ca_Kabuli_denovo</i>      | 420329                         | (A/G)       |
| 17603       | CakSNP17603    | <i>Kabuli</i>    | <i>Ca_Kabuli_denovo</i>      | 420360                         | (A/G)       |
| 17604       | CakSNP17604    | <i>Kabuli</i>    | <i>Ca_Kabuli_denovo</i>      | 422246                         | (C/G)       |
| 17605       | CakSNP17605    | <i>Kabuli</i>    | <i>Ca_Kabuli_denovo</i>      | 422283                         | (G/A)       |
| 17606       | CakSNP17606    | <i>Kabuli</i>    | <i>Ca_Kabuli_denovo</i>      | 422291                         | (T/G)       |
| 17607       | CakSNP17607    | <i>Kabuli</i>    | <i>Ca_Kabuli_denovo</i>      | 422304                         | (C/A)       |
| 17608       | CakSNP17608    | <i>Kabuli</i>    | <i>Ca_Kabuli_denovo</i>      | 425114                         | (A/G)       |
| 17609       | CakSNP17609    | <i>Kabuli</i>    | <i>Ca_Kabuli_denovo</i>      | 425192                         | (A/G)       |
| 17610       | CakSNP17610    | <i>Kabuli</i>    | <i>Ca_Kabuli_denovo</i>      | 427123                         | (T/G)       |
| 17611       | CakSNP17611    | <i>Kabuli</i>    | <i>Ca_Kabuli_denovo</i>      | 440472                         | (A/G)       |
| 17612       | CakSNP17612    | <i>Kabuli</i>    | <i>Ca_Kabuli_denovo</i>      | 441668                         | (T/G)       |
| 17613       | CakSNP17613    | <i>Kabuli</i>    | <i>Ca_Kabuli_denovo</i>      | 442080                         | (T/G)       |
| 17614       | CakSNP17614    | <i>Kabuli</i>    | <i>Ca_Kabuli_denovo</i>      | 442120                         | (T/C)       |
| 17615       | CakSNP17615    | <i>Kabuli</i>    | <i>Ca_Kabuli_denovo</i>      | 442121                         | (C/A)       |
| 17616       | CakSNP17616    | <i>Kabuli</i>    | <i>Ca_Kabuli_denovo</i>      | 442122                         | (T/A)       |
| 17617       | CakSNP17617    | <i>Kabuli</i>    | <i>Ca_Kabuli_denovo</i>      | 442213                         | (C/T)       |
| 17618       | CakSNP17618    | <i>Kabuli</i>    | <i>Ca_Kabuli_denovo</i>      | 442216                         | (C/T)       |
| 17619       | CakSNP17619    | <i>Kabuli</i>    | <i>Ca_Kabuli_denovo</i>      | 442391                         | (G/C)       |
| 17620       | CakSNP17620    | <i>Kabuli</i>    | <i>Ca_Kabuli_denovo</i>      | 442393                         | (C/G)       |
| 17621       | CakSNP17621    | <i>Kabuli</i>    | <i>Ca_Kabuli_denovo</i>      | 442394                         | (G/A)       |
| 17622       | CakSNP17622    | <i>Kabuli</i>    | <i>Ca_Kabuli_denovo</i>      | 442395                         | (G/A)       |
| 17623       | CakSNP17623    | <i>Kabuli</i>    | <i>Ca_Kabuli_denovo</i>      | 442398                         | (C/T)       |
| 17624       | CakSNP17624    | <i>Kabuli</i>    | <i>Ca_Kabuli_denovo</i>      | 442399                         | (G/C)       |
| 17625       | CakSNP17625    | <i>Kabuli</i>    | <i>Ca_Kabuli_denovo</i>      | 442400                         | (A/G)       |
| 17626       | CakSNP17626    | <i>Kabuli</i>    | <i>Ca_Kabuli_denovo</i>      | 442402                         | (C/A)       |

| <b>S.N.</b> | <b>SNP IDs</b> | <b>Cultivars</b> | <b>Chromosomes/scaffolds</b> | <b>Physical positions (bp)</b> | <b>SNPs</b> |
|-------------|----------------|------------------|------------------------------|--------------------------------|-------------|
| 17627       | CakSNP17627    | <i>Kabuli</i>    | <i>Ca_Kabuli_denovo</i>      | 443991                         | (T/G)       |
| 17628       | CakSNP17628    | <i>Kabuli</i>    | <i>Ca_Kabuli_denovo</i>      | 444015                         | (T/C)       |
| 17629       | CakSNP17629    | <i>Kabuli</i>    | <i>Ca_Kabuli_denovo</i>      | 444023                         | (T/G)       |
| 17630       | CakSNP17630    | <i>Kabuli</i>    | <i>Ca_Kabuli_denovo</i>      | 444031                         | (A/G)       |
| 17631       | CakSNP17631    | <i>Kabuli</i>    | <i>Ca_Kabuli_denovo</i>      | 453291                         | (C/G)       |
| 17632       | CakSNP17632    | <i>Kabuli</i>    | <i>Ca_Kabuli_denovo</i>      | 453300                         | (A/G)       |
| 17633       | CakSNP17633    | <i>Kabuli</i>    | <i>Ca_Kabuli_denovo</i>      | 453318                         | (A/G)       |
| 17634       | CakSNP17634    | <i>Kabuli</i>    | <i>Ca_Kabuli_denovo</i>      | 453861                         | (G/A)       |
| 17635       | CakSNP17635    | <i>Kabuli</i>    | <i>Ca_Kabuli_denovo</i>      | 453862                         | (G/A)       |
| 17636       | CakSNP17636    | <i>Kabuli</i>    | <i>Ca_Kabuli_denovo</i>      | 453900                         | (G/A)       |
| 17637       | CakSNP17637    | <i>Kabuli</i>    | <i>Ca_Kabuli_denovo</i>      | 454466                         | (C/G)       |
| 17638       | CakSNP17638    | <i>Kabuli</i>    | <i>Ca_Kabuli_denovo</i>      | 468460                         | (G/A)       |
| 17639       | CakSNP17639    | <i>Kabuli</i>    | <i>Ca_Kabuli_denovo</i>      | 469180                         | (A/G)       |
| 17640       | CakSNP17640    | <i>Kabuli</i>    | <i>Ca_Kabuli_denovo</i>      | 476805                         | (G/C)       |
| 17641       | CakSNP17641    | <i>Kabuli</i>    | <i>Ca_Kabuli_denovo</i>      | 476807                         | (C/G)       |
| 17642       | CakSNP17642    | <i>Kabuli</i>    | <i>Ca_Kabuli_denovo</i>      | 476808                         | (A/G)       |
| 17643       | CakSNP17643    | <i>Kabuli</i>    | <i>Ca_Kabuli_denovo</i>      | 476809                         | (G/A)       |
| 17644       | CakSNP17644    | <i>Kabuli</i>    | <i>Ca_Kabuli_denovo</i>      | 476811                         | (C/A)       |
| 17645       | CakSNP17645    | <i>Kabuli</i>    | <i>Ca_Kabuli_denovo</i>      | 479038                         | (C/A)       |
| 17646       | CakSNP17646    | <i>Kabuli</i>    | <i>Ca_Kabuli_denovo</i>      | 479043                         | (A/G)       |
| 17647       | CakSNP17647    | <i>Kabuli</i>    | <i>Ca_Kabuli_denovo</i>      | 489994                         | (T/G)       |
| 17648       | CakSNP17648    | <i>Kabuli</i>    | <i>Ca_Kabuli_denovo</i>      | 490709                         | (G/C)       |
| 17649       | CakSNP17649    | <i>Kabuli</i>    | <i>Ca_Kabuli_denovo</i>      | 490829                         | (C/A)       |
| 17650       | CakSNP17650    | <i>Kabuli</i>    | <i>Ca_Kabuli_denovo</i>      | 490851                         | (A/C)       |
| 17651       | CakSNP17651    | <i>Kabuli</i>    | <i>Ca_Kabuli_denovo</i>      | 490863                         | (T/G)       |
| 17652       | CakSNP17652    | <i>Kabuli</i>    | <i>Ca_Kabuli_denovo</i>      | 490944                         | (C/A)       |
| 17653       | CakSNP17653    | <i>Kabuli</i>    | <i>Ca_Kabuli_denovo</i>      | 490945                         | (A/T)       |
| 17654       | CakSNP17654    | <i>Kabuli</i>    | <i>Ca_Kabuli_denovo</i>      | 490946                         | (G/T)       |
| 17655       | CakSNP17655    | <i>Kabuli</i>    | <i>Ca_Kabuli_denovo</i>      | 490947                         | (A/C)       |
| 17656       | CakSNP17656    | <i>Kabuli</i>    | <i>Ca_Kabuli_denovo</i>      | 491027                         | (G/T)       |
| 17657       | CakSNP17657    | <i>Kabuli</i>    | <i>Ca_Kabuli_denovo</i>      | 492735                         | (A/T)       |
| 17658       | CakSNP17658    | <i>Kabuli</i>    | <i>Ca_Kabuli_denovo</i>      | 500805                         | (A/C)       |
| 17659       | CakSNP17659    | <i>Kabuli</i>    | <i>Ca_Kabuli_denovo</i>      | 504532                         | (T/G)       |
| 17660       | CakSNP17660    | <i>Kabuli</i>    | <i>Ca_Kabuli_denovo</i>      | 504535                         | (C/G)       |
| 17661       | CakSNP17661    | <i>Kabuli</i>    | <i>Ca_Kabuli_denovo</i>      | 504543                         | (T/G)       |
| 17662       | CakSNP17662    | <i>Kabuli</i>    | <i>Ca_Kabuli_denovo</i>      | 504570                         | (A/G)       |
| 17663       | CakSNP17663    | <i>Kabuli</i>    | <i>Ca_Kabuli_denovo</i>      | 504576                         | (T/G)       |
| 17664       | CakSNP17664    | <i>Kabuli</i>    | <i>Ca_Kabuli_denovo</i>      | 504608                         | (G/A)       |
| 17665       | CakSNP17665    | <i>Kabuli</i>    | <i>Ca_Kabuli_denovo</i>      | 504615                         | (C/T)       |

| <b>S.N.</b> | <b>SNP IDs</b> | <b>Cultivars</b> | <b>Chromosomes/scaffolds</b> | <b>Physical positions (bp)</b> | <b>SNPs</b> |
|-------------|----------------|------------------|------------------------------|--------------------------------|-------------|
| 17666       | CakSNP17666    | <i>Kabuli</i>    | <i>Ca_Kabuli_denovo</i>      | 514036                         | (G/C)       |
| 17667       | CakSNP17667    | <i>Kabuli</i>    | <i>Ca_Kabuli_denovo</i>      | 514044                         | (T/C)       |
| 17668       | CakSNP17668    | <i>Kabuli</i>    | <i>Ca_Kabuli_denovo</i>      | 520412                         | (A/G)       |
| 17669       | CakSNP17669    | <i>Kabuli</i>    | <i>Ca_Kabuli_denovo</i>      | 520413                         | (G/A)       |
| 17670       | CakSNP17670    | <i>Kabuli</i>    | <i>Ca_Kabuli_denovo</i>      | 520414                         | (G/T)       |
| 17671       | CakSNP17671    | <i>Kabuli</i>    | <i>Ca_Kabuli_denovo</i>      | 520415                         | (A/C)       |
| 17672       | CakSNP17672    | <i>Kabuli</i>    | <i>Ca_Kabuli_denovo</i>      | 520883                         | (G/A)       |
| 17673       | CakSNP17673    | <i>Kabuli</i>    | <i>Ca_Kabuli_denovo</i>      | 523230                         | (A/G)       |
| 17674       | CakSNP17674    | <i>Kabuli</i>    | <i>Ca_Kabuli_denovo</i>      | 523242                         | (T/A)       |
| 17675       | CakSNP17675    | <i>Kabuli</i>    | <i>Ca_Kabuli_denovo</i>      | 525830                         | (C/A)       |
| 17676       | CakSNP17676    | <i>Kabuli</i>    | <i>Ca_Kabuli_denovo</i>      | 525854                         | (T/A)       |
| 17677       | CakSNP17677    | <i>Kabuli</i>    | <i>Ca_Kabuli_denovo</i>      | 525877                         | (G/C)       |
| 17678       | CakSNP17678    | <i>Kabuli</i>    | <i>Ca_Kabuli_denovo</i>      | 533049                         | (A/T)       |
| 17679       | CakSNP17679    | <i>Kabuli</i>    | <i>Ca_Kabuli_denovo</i>      | 533050                         | (G/T)       |
| 17680       | CakSNP17680    | <i>Kabuli</i>    | <i>Ca_Kabuli_denovo</i>      | 533054                         | (C/T)       |
| 17681       | CakSNP17681    | <i>Kabuli</i>    | <i>Ca_Kabuli_denovo</i>      | 534272                         | (A/G)       |
| 17682       | CakSNP17682    | <i>Kabuli</i>    | <i>Ca_Kabuli_denovo</i>      | 554834                         | (G/C)       |
| 17683       | CakSNP17683    | <i>Kabuli</i>    | <i>Ca_Kabuli_denovo</i>      | 554836                         | (A/G)       |
| 17684       | CakSNP17684    | <i>Kabuli</i>    | <i>Ca_Kabuli_denovo</i>      | 554837                         | (G/A)       |
| 17685       | CakSNP17685    | <i>Kabuli</i>    | <i>Ca_Kabuli_denovo</i>      | 554838                         | (G/A)       |
| 17686       | CakSNP17686    | <i>Kabuli</i>    | <i>Ca_Kabuli_denovo</i>      | 554839                         | (A/G)       |
| 17687       | CakSNP17687    | <i>Kabuli</i>    | <i>Ca_Kabuli_denovo</i>      | 565001                         | (C/G)       |
| 17688       | CakSNP17688    | <i>Kabuli</i>    | <i>Ca_Kabuli_denovo</i>      | 565008                         | (T/G)       |
| 17689       | CakSNP17689    | <i>Kabuli</i>    | <i>Ca_Kabuli_denovo</i>      | 565056                         | (A/G)       |
| 17690       | CakSNP17690    | <i>Kabuli</i>    | <i>Ca_Kabuli_denovo</i>      | 565065                         | (C/G)       |
| 17691       | CakSNP17691    | <i>Kabuli</i>    | <i>Ca_Kabuli_denovo</i>      | 566223                         | (A/G)       |
| 17692       | CakSNP17692    | <i>Kabuli</i>    | <i>Ca_Kabuli_denovo</i>      | 566225                         | (T/G)       |
| 17693       | CakSNP17693    | <i>Kabuli</i>    | <i>Ca_Kabuli_denovo</i>      | 566238                         | (C/A)       |
| 17694       | CakSNP17694    | <i>Kabuli</i>    | <i>Ca_Kabuli_denovo</i>      | 566255                         | (T/C)       |
| 17695       | CakSNP17695    | <i>Kabuli</i>    | <i>Ca_Kabuli_denovo</i>      | 575792                         | (T/G)       |
| 17696       | CakSNP17696    | <i>Kabuli</i>    | <i>Ca_Kabuli_denovo</i>      | 575809                         | (A/G)       |
| 17697       | CakSNP17697    | <i>Kabuli</i>    | <i>Ca_Kabuli_denovo</i>      | 736077                         | (A/C)       |
| 17698       | CakSNP17698    | <i>Kabuli</i>    | <i>Ca_Kabuli_denovo</i>      | 861305                         | (T/C)       |
| 17699       | CakSNP17699    | <i>Kabuli</i>    | <i>Ca_Kabuli_denovo</i>      | 861308                         | (G/C)       |
| 17700       | CakSNP17700    | <i>Kabuli</i>    | <i>Ca_Kabuli_denovo</i>      | 930198                         | (T/A)       |
| 17701       | CakSNP17701    | <i>Kabuli</i>    | <i>Ca_Kabuli_denovo</i>      | 930227                         | (T/G)       |
| 17702       | CakSNP17702    | <i>Kabuli</i>    | <i>Ca_Kabuli_denovo</i>      | 930235                         | (A/G)       |
| 17703       | CakSNP17703    | <i>Kabuli</i>    | <i>Ca_Kabuli_denovo</i>      | 930257                         | (T/G)       |
| 17704       | CakSNP17704    | <i>Kabuli</i>    | <i>Ca_Kabuli_denovo</i>      | 930278                         | (G/C)       |

| <b>S.N.</b> | <b>SNP IDs</b> | <b>Cultivars</b> | <b>Chromosomes/scaffolds</b> | <b>Physical positions (bp)</b> | <b>SNPs</b> |
|-------------|----------------|------------------|------------------------------|--------------------------------|-------------|
| 17705       | CakSNP17705    | <i>Kabuli</i>    | <i>Ca_Kabuli_denovo</i>      | 930279                         | (G/A)       |
| 17706       | CakSNP17706    | <i>Kabuli</i>    | <i>Ca_Kabuli_denovo</i>      | 933718                         | (C/A)       |
| 17707       | CakSNP17707    | <i>Kabuli</i>    | <i>Ca_Kabuli_denovo</i>      | 933719                         | (T/G)       |
| 17708       | CakSNP17708    | <i>Kabuli</i>    | <i>Ca_Kabuli_denovo</i>      | 933720                         | (C/A)       |
| 17709       | CakSNP17709    | <i>Kabuli</i>    | <i>Ca_Kabuli_denovo</i>      | 965223                         | (A/G)       |
| 17710       | CakSNP17710    | <i>Kabuli</i>    | <i>Ca_Kabuli_denovo</i>      | 1158419                        | (G/C)       |
| 17711       | CakSNP17711    | <i>Kabuli</i>    | <i>Ca_Kabuli_denovo</i>      | 1158466                        | (C/G)       |
| 17712       | CakSNP17712    | <i>Kabuli</i>    | <i>Ca_Kabuli_denovo</i>      | 1188058                        | (C/A)       |
| 17713       | CakSNP17713    | <i>Kabuli</i>    | <i>Ca_Kabuli_denovo</i>      | 1188059                        | (A/C)       |
| 17714       | CakSNP17714    | <i>Kabuli</i>    | <i>Ca_Kabuli_denovo</i>      | 1188060                        | (G/C)       |
| 17715       | CakSNP17715    | <i>Kabuli</i>    | <i>Ca_Kabuli_denovo</i>      | 1188063                        | (T/A)       |
| 17716       | CakSNP17716    | <i>Kabuli</i>    | <i>Ca_Kabuli_denovo</i>      | 1188064                        | (C/T)       |
| 17717       | CakSNP17717    | <i>Kabuli</i>    | <i>Ca_Kabuli_denovo</i>      | 1286765                        | (C/A)       |
| 17718       | CakSNP17718    | <i>Kabuli</i>    | <i>Ca_Kabuli_denovo</i>      | 1286799                        | (T/G)       |
| 17719       | CakSNP17719    | <i>Kabuli</i>    | <i>Ca_Kabuli_denovo</i>      | 1286839                        | (C/A)       |
| 17720       | CakSNP17720    | <i>Kabuli</i>    | <i>Ca_Kabuli_denovo</i>      | 1286848                        | (T/G)       |
| 17721       | CakSNP17721    | <i>Kabuli</i>    | <i>Ca_Kabuli_denovo</i>      | 1286873                        | (T/A)       |
| 17722       | CakSNP17722    | <i>Kabuli</i>    | <i>Ca_Kabuli_denovo</i>      | 1286885                        | (A/G)       |
| 17723       | CakSNP17723    | <i>Kabuli</i>    | <i>Ca_Kabuli_denovo</i>      | 1286892                        | (T/G)       |
| 17724       | CakSNP17724    | <i>Kabuli</i>    | <i>Ca_Kabuli_denovo</i>      | 1286899                        | (A/G)       |
| 17725       | CakSNP17725    | <i>Kabuli</i>    | <i>Ca_Kabuli_denovo</i>      | 1286901                        | (C/A)       |
| 17726       | CakSNP17726    | <i>Kabuli</i>    | <i>Ca_Kabuli_denovo</i>      | 1541967                        | (C/G)       |
| 17727       | CakSNP17727    | <i>Kabuli</i>    | <i>Ca_Kabuli_denovo</i>      | 1542153                        | (T/G)       |
| 17728       | CakSNP17728    | <i>Kabuli</i>    | <i>Ca_Kabuli_denovo</i>      | 1602962                        | (T/A)       |
| 17729       | CakSNP17729    | <i>Kabuli</i>    | <i>Ca_Kabuli_denovo</i>      | 1603019                        | (T/C)       |
| 17730       | CakSNP17730    | <i>Kabuli</i>    | <i>Ca_Kabuli_denovo</i>      | 1603020                        | (T/A)       |
| 17731       | CakSNP17731    | <i>Kabuli</i>    | <i>Ca_Kabuli_denovo</i>      | 1603038                        | (A/C)       |
| 17732       | CakSNP17732    | <i>Kabuli</i>    | <i>Ca_Kabuli_denovo</i>      | 1603067                        | (C/G)       |
| 17733       | CakSNP17733    | <i>Kabuli</i>    | <i>Ca_Kabuli_denovo</i>      | 1603073                        | (G/T)       |
| 17734       | CakSNP17734    | <i>Kabuli</i>    | <i>Ca_Kabuli_denovo</i>      | 1603120                        | (G/C)       |
| 17735       | CakSNP17735    | <i>Kabuli</i>    | <i>Ca_Kabuli_denovo</i>      | 1604436                        | (A/G)       |
| 17736       | CakSNP17736    | <i>Kabuli</i>    | <i>Ca_Kabuli_denovo</i>      | 1604633                        | (G/A)       |
| 17737       | CakSNP17737    | <i>Kabuli</i>    | <i>Ca_Kabuli_denovo</i>      | 1604645                        | (G/A)       |
| 17738       | CakSNP17738    | <i>Kabuli</i>    | <i>Ca_Kabuli_denovo</i>      | 1604682                        | (T/G)       |
| 17739       | CakSNP17739    | <i>Kabuli</i>    | <i>Ca_Kabuli_denovo</i>      | 1607526                        | (A/G)       |
| 17740       | CakSNP17740    | <i>Kabuli</i>    | <i>Ca_Kabuli_denovo</i>      | 1621430                        | (C/G)       |
| 17741       | CakSNP17741    | <i>Kabuli</i>    | <i>Ca_Kabuli_denovo</i>      | 1621431                        | (C/G)       |
| 17742       | CakSNP17742    | <i>Kabuli</i>    | <i>Ca_Kabuli_denovo</i>      | 1622000                        | (T/A)       |
| 17743       | CakSNP17743    | <i>Kabuli</i>    | <i>Ca_Kabuli_denovo</i>      | 1622001                        | (T/G)       |



| <b>S.N.</b> | <b>SNP IDs</b> | <b>Cultivars</b> | <b>Chromosomes/scaffolds</b> | <b>Physical positions (bp)</b> | <b>SNPs</b> |
|-------------|----------------|------------------|------------------------------|--------------------------------|-------------|
| 17744       | CakSNP17744    | <i>Kabuli</i>    | <i>Ca_Kabuli_denovo</i>      | 1622005                        | (G/C)       |
| 17745       | CakSNP17745    | <i>Kabuli</i>    | <i>Ca_Kabuli_denovo</i>      | 1627804                        | (A/G)       |
| 17746       | CakSNP17746    | <i>Kabuli</i>    | <i>Ca_Kabuli_denovo</i>      | 1627832                        | (C/G)       |
| 17747       | CakSNP17747    | <i>Kabuli</i>    | <i>Ca_Kabuli_denovo</i>      | 1627845                        | (C/G)       |
| 17748       | CakSNP17748    | <i>Kabuli</i>    | <i>Ca_Kabuli_denovo</i>      | 1629193                        | (C/G)       |
| 17749       | CakSNP17749    | <i>Kabuli</i>    | <i>Ca_Kabuli_denovo</i>      | 1629194                        | (G/T)       |
| 17750       | CakSNP17750    | <i>Kabuli</i>    | <i>Ca_Kabuli_denovo</i>      | 1629209                        | (C/G)       |
| 17751       | CakSNP17751    | <i>Kabuli</i>    | <i>Ca_Kabuli_denovo</i>      | 1629225                        | (T/G)       |
| 17752       | CakSNP17752    | <i>Kabuli</i>    | <i>Ca_Kabuli_denovo</i>      | 1645344                        | (A/C)       |
| 17753       | CakSNP17753    | <i>Kabuli</i>    | <i>Ca_Kabuli_denovo</i>      | 1646822                        | (T/A)       |
| 17754       | CakSNP17754    | <i>Kabuli</i>    | <i>Ca_Kabuli_denovo</i>      | 1646824                        | (C/G)       |
| 17755       | CakSNP17755    | <i>Kabuli</i>    | <i>Ca_Kabuli_denovo</i>      | 1646825                        | (C/A)       |
| 17756       | CakSNP17756    | <i>Kabuli</i>    | <i>Ca_Kabuli_denovo</i>      | 1646826                        | (C/G)       |
| 17757       | CakSNP17757    | <i>Kabuli</i>    | <i>Ca_Kabuli_denovo</i>      | 1651702                        | (C/G)       |
| 17758       | CakSNP17758    | <i>Kabuli</i>    | <i>Ca_Kabuli_denovo</i>      | 1651703                        | (G/A)       |
| 17759       | CakSNP17759    | <i>Kabuli</i>    | <i>Ca_Kabuli_denovo</i>      | 1651738                        | (A/G)       |
| 17760       | CakSNP17760    | <i>Kabuli</i>    | <i>Ca_Kabuli_denovo</i>      | 1657001                        | (C/G)       |
| 17761       | CakSNP17761    | <i>Kabuli</i>    | <i>Ca_Kabuli_denovo</i>      | 1657040                        | (T/G)       |
| 17762       | CakSNP17762    | <i>Kabuli</i>    | <i>Ca_Kabuli_denovo</i>      | 1662755                        | (C/G)       |
| 17763       | CakSNP17763    | <i>Kabuli</i>    | <i>Ca_Kabuli_denovo</i>      | 1662758                        | (A/G)       |
| 17764       | CakSNP17764    | <i>Kabuli</i>    | <i>Ca_Kabuli_denovo</i>      | 1662759                        | (T/G)       |
| 17765       | CakSNP17765    | <i>Kabuli</i>    | <i>Ca_Kabuli_denovo</i>      | 1662766                        | (G/A)       |
| 17766       | CakSNP17766    | <i>Kabuli</i>    | <i>Ca_Kabuli_denovo</i>      | 1662768                        | (A/G)       |
| 17767       | CakSNP17767    | <i>Kabuli</i>    | <i>Ca_Kabuli_denovo</i>      | 1662796                        | (G/A)       |
| 17768       | CakSNP17768    | <i>Kabuli</i>    | <i>Ca_Kabuli_denovo</i>      | 1664534                        | (T/G)       |
| 17769       | CakSNP17769    | <i>Kabuli</i>    | <i>Ca_Kabuli_denovo</i>      | 1664562                        | (T/G)       |
| 17770       | CakSNP17770    | <i>Kabuli</i>    | <i>Ca_Kabuli_denovo</i>      | 1664573                        | (A/G)       |
| 17771       | CakSNP17771    | <i>Kabuli</i>    | <i>Ca_Kabuli_denovo</i>      | 1665734                        | (A/G)       |
| 17772       | CakSNP17772    | <i>Kabuli</i>    | <i>Ca_Kabuli_denovo</i>      | 1665742                        | (G/A)       |
| 17773       | CakSNP17773    | <i>Kabuli</i>    | <i>Ca_Kabuli_denovo</i>      | 1665774                        | (C/G)       |
| 17774       | CakSNP17774    | <i>Kabuli</i>    | <i>Ca_Kabuli_denovo</i>      | 1665815                        | (T/G)       |
| 17775       | CakSNP17775    | <i>Kabuli</i>    | <i>Ca_Kabuli_denovo</i>      | 1670929                        | (C/T)       |
| 17776       | CakSNP17776    | <i>Kabuli</i>    | <i>Ca_Kabuli_denovo</i>      | 1670930                        | (C/G)       |
| 17777       | CakSNP17777    | <i>Kabuli</i>    | <i>Ca_Kabuli_denovo</i>      | 1670931                        | (G/C)       |
| 17778       | CakSNP17778    | <i>Kabuli</i>    | <i>Ca_Kabuli_denovo</i>      | 1670932                        | (A/C)       |
| 17779       | CakSNP17779    | <i>Kabuli</i>    | <i>Ca_Kabuli_denovo</i>      | 1674472                        | (T/G)       |
| 17780       | CakSNP17780    | <i>Kabuli</i>    | <i>Ca_Kabuli_denovo</i>      | 1674473                        | (T/G)       |
| 17781       | CakSNP17781    | <i>Kabuli</i>    | <i>Ca_Kabuli_denovo</i>      | 1674498                        | (G/A)       |
| 17782       | CakSNP17782    | <i>Kabuli</i>    | <i>Ca_Kabuli_denovo</i>      | 1674513                        | (A/G)       |

| <b>S.N.</b> | <b>SNP IDs</b> | <b>Cultivars</b> | <b>Chromosomes/scaffolds</b> | <b>Physical positions (bp)</b> | <b>SNPs</b> |
|-------------|----------------|------------------|------------------------------|--------------------------------|-------------|
| 17783       | CakSNP17783    | <i>Kabuli</i>    | <i>Ca_Kabuli_denovo</i>      | 1674786                        | (T/G)       |
| 17784       | CakSNP17784    | <i>Kabuli</i>    | <i>Ca_Kabuli_denovo</i>      | 1674794                        | (G/T)       |
| 17785       | CakSNP17785    | <i>Kabuli</i>    | <i>Ca_Kabuli_denovo</i>      | 1674824                        | (T/G)       |
| 17786       | CakSNP17786    | <i>Kabuli</i>    | <i>Ca_Kabuli_denovo</i>      | 1676619                        | (A/C)       |
| 17787       | CakSNP17787    | <i>Kabuli</i>    | <i>Ca_Kabuli_denovo</i>      | 1676622                        | (C/A)       |
| 17788       | CakSNP17788    | <i>Kabuli</i>    | <i>Ca_Kabuli_denovo</i>      | 1676628                        | (C/G)       |
| 17789       | CakSNP17789    | <i>Kabuli</i>    | <i>Ca_Kabuli_denovo</i>      | 1676641                        | (T/A)       |
| 17790       | CakSNP17790    | <i>Kabuli</i>    | <i>Ca_Kabuli_denovo</i>      | 1676642                        | (T/G)       |
| 17791       | CakSNP17791    | <i>Kabuli</i>    | <i>Ca_Kabuli_denovo</i>      | 1676643                        | (T/G)       |
| 17792       | CakSNP17792    | <i>Kabuli</i>    | <i>Ca_Kabuli_denovo</i>      | 1676647                        | (A/G)       |
| 17793       | CakSNP17793    | <i>Kabuli</i>    | <i>Ca_Kabuli_denovo</i>      | 1676665                        | (T/G)       |
| 17794       | CakSNP17794    | <i>Kabuli</i>    | <i>Ca_Kabuli_denovo</i>      | 1676692                        | (T/G)       |
| 17795       | CakSNP17795    | <i>Kabuli</i>    | <i>Ca_Kabuli_denovo</i>      | 1679945                        | (C/T)       |
| 17796       | CakSNP17796    | <i>Kabuli</i>    | <i>Ca_Kabuli_denovo</i>      | 1684919                        | (A/T)       |
| 17797       | CakSNP17797    | <i>Kabuli</i>    | <i>Ca_Kabuli_denovo</i>      | 1684920                        | (G/T)       |
| 17798       | CakSNP17798    | <i>Kabuli</i>    | <i>Ca_Kabuli_denovo</i>      | 1684923                        | (T/G)       |
| 17799       | CakSNP17799    | <i>Kabuli</i>    | <i>Ca_Kabuli_denovo</i>      | 1685743                        | (A/C)       |
| 17800       | CakSNP17800    | <i>Kabuli</i>    | <i>Ca_Kabuli_denovo</i>      | 1685744                        | (C/T)       |
| 17801       | CakSNP17801    | <i>Kabuli</i>    | <i>Ca_Kabuli_denovo</i>      | 1685745                        | (T/C)       |
| 17802       | CakSNP17802    | <i>Kabuli</i>    | <i>Ca_Kabuli_denovo</i>      | 1687665                        | (A/G)       |
| 17803       | CakSNP17803    | <i>Kabuli</i>    | <i>Ca_Kabuli_denovo</i>      | 1687667                        | (A/G)       |
| 17804       | CakSNP17804    | <i>Kabuli</i>    | <i>Ca_Kabuli_denovo</i>      | 1687669                        | (A/T)       |
| 17805       | CakSNP17805    | <i>Kabuli</i>    | <i>Ca_Kabuli_denovo</i>      | 1688595                        | (A/T)       |
| 17806       | CakSNP17806    | <i>Kabuli</i>    | <i>Ca_Kabuli_denovo</i>      | 1688596                        | (T/C)       |
| 17807       | CakSNP17807    | <i>Kabuli</i>    | <i>Ca_Kabuli_denovo</i>      | 1688598                        | (C/A)       |
| 17808       | CakSNP17808    | <i>Kabuli</i>    | <i>Ca_Kabuli_denovo</i>      | 1688599                        | (A/T)       |
| 17809       | CakSNP17809    | <i>Kabuli</i>    | <i>Ca_Kabuli_denovo</i>      | 1688600                        | (C/A)       |
| 17810       | CakSNP17810    | <i>Kabuli</i>    | <i>Ca_Kabuli_denovo</i>      | 1690593                        | (G/A)       |
| 17811       | CakSNP17811    | <i>Kabuli</i>    | <i>Ca_Kabuli_denovo</i>      | 1690595                        | (T/G)       |
| 17812       | CakSNP17812    | <i>Kabuli</i>    | <i>Ca_Kabuli_denovo</i>      | 1690605                        | (T/A)       |
| 17813       | CakSNP17813    | <i>Kabuli</i>    | <i>Ca_Kabuli_denovo</i>      | 1696698                        | (T/G)       |
| 17814       | CakSNP17814    | <i>Kabuli</i>    | <i>Ca_Kabuli_denovo</i>      | 1696705                        | (C/G)       |
| 17815       | CakSNP17815    | <i>Kabuli</i>    | <i>Ca_Kabuli_denovo</i>      | 1698932                        | (G/C)       |
| 17816       | CakSNP17816    | <i>Kabuli</i>    | <i>Ca_Kabuli_denovo</i>      | 1698934                        | (A/G)       |
| 17817       | CakSNP17817    | <i>Kabuli</i>    | <i>Ca_Kabuli_denovo</i>      | 1698960                        | (A/G)       |
| 17818       | CakSNP17818    | <i>Kabuli</i>    | <i>Ca_Kabuli_denovo</i>      | 1699496                        | (C/G)       |
| 17819       | CakSNP17819    | <i>Kabuli</i>    | <i>Ca_Kabuli_denovo</i>      | 1699498                        | (C/G)       |
| 17820       | CakSNP17820    | <i>Kabuli</i>    | <i>Ca_Kabuli_denovo</i>      | 1699521                        | (T/G)       |
| 17821       | CakSNP17821    | <i>Kabuli</i>    | <i>Ca_Kabuli_denovo</i>      | 1699556                        | (G/T)       |

| <b>S.N.</b> | <b>SNP IDs</b> | <b>Cultivars</b> | <b>Chromosomes/scaffolds</b> | <b>Physical positions (bp)</b> | <b>SNPs</b> |
|-------------|----------------|------------------|------------------------------|--------------------------------|-------------|
| 17822       | CakSNP17822    | <i>Kabuli</i>    | <i>Ca_Kabuli_denovo</i>      | 1699569                        | (A/T)       |
| 17823       | CakSNP17823    | <i>Kabuli</i>    | <i>Ca_Kabuli_denovo</i>      | 1707083                        | (C/A)       |
| 17824       | CakSNP17824    | <i>Kabuli</i>    | <i>Ca_Kabuli_denovo</i>      | 1707085                        | (C/G)       |
| 17825       | CakSNP17825    | <i>Kabuli</i>    | <i>Ca_Kabuli_denovo</i>      | 1707086                        | (A/T)       |
| 17826       | CakSNP17826    | <i>Kabuli</i>    | <i>Ca_Kabuli_denovo</i>      | 1707560                        | (C/A)       |
| 17827       | CakSNP17827    | <i>Kabuli</i>    | <i>Ca_Kabuli_denovo</i>      | 1707561                        | (A/G)       |
| 17828       | CakSNP17828    | <i>Kabuli</i>    | <i>Ca_Kabuli_denovo</i>      | 1707563                        | (A/G)       |
| 17829       | CakSNP17829    | <i>Kabuli</i>    | <i>Ca_Kabuli_denovo</i>      | 1707565                        | (T/A)       |
| 17830       | CakSNP17830    | <i>Kabuli</i>    | <i>Ca_Kabuli_denovo</i>      | 1732322                        | (A/G)       |
| 17831       | CakSNP17831    | <i>Kabuli</i>    | <i>Ca_Kabuli_denovo</i>      | 1732338                        | (C/T)       |
| 17832       | CakSNP17832    | <i>Kabuli</i>    | <i>Ca_Kabuli_denovo</i>      | 1734760                        | (G/C)       |
| 17833       | CakSNP17833    | <i>Kabuli</i>    | <i>Ca_Kabuli_denovo</i>      | 1735490                        | (C/G)       |
| 17834       | CakSNP17834    | <i>Kabuli</i>    | <i>Ca_Kabuli_denovo</i>      | 1735502                        | (C/T)       |
| 17835       | CakSNP17835    | <i>Kabuli</i>    | <i>Ca_Kabuli_denovo</i>      | 1735523                        | (T/C)       |
| 17836       | CakSNP17836    | <i>Kabuli</i>    | <i>Ca_Kabuli_denovo</i>      | 1735891                        | (T/G)       |
| 17837       | CakSNP17837    | <i>Kabuli</i>    | <i>Ca_Kabuli_denovo</i>      | 1735929                        | (T/A)       |
| 17838       | CakSNP17838    | <i>Kabuli</i>    | <i>Ca_Kabuli_denovo</i>      | 1735956                        | (G/C)       |
| 17839       | CakSNP17839    | <i>Kabuli</i>    | <i>Ca_Kabuli_denovo</i>      | 1735988                        | (A/G)       |
| 17840       | CakSNP17840    | <i>Kabuli</i>    | <i>Ca_Kabuli_denovo</i>      | 1737810                        | (A/G)       |
| 17841       | CakSNP17841    | <i>Kabuli</i>    | <i>Ca_Kabuli_denovo</i>      | 1737898                        | (T/G)       |
| 17842       | CakSNP17842    | <i>Kabuli</i>    | <i>Ca_Kabuli_denovo</i>      | 1737939                        | (G/A)       |
| 17843       | CakSNP17843    | <i>Kabuli</i>    | <i>Ca_Kabuli_denovo</i>      | 1737964                        | (C/A)       |
| 17844       | CakSNP17844    | <i>Kabuli</i>    | <i>Ca_Kabuli_denovo</i>      | 1739167                        | (G/C)       |
| 17845       | CakSNP17845    | <i>Kabuli</i>    | <i>Ca_Kabuli_denovo</i>      | 1739168                        | (A/C)       |
| 17846       | CakSNP17846    | <i>Kabuli</i>    | <i>Ca_Kabuli_denovo</i>      | 1739955                        | (G/A)       |
| 17847       | CakSNP17847    | <i>Kabuli</i>    | <i>Ca_Kabuli_denovo</i>      | 1740013                        | (T/G)       |
| 17848       | CakSNP17848    | <i>Kabuli</i>    | <i>Ca_Kabuli_denovo</i>      | 1741581                        | (G/A)       |
| 17849       | CakSNP17849    | <i>Kabuli</i>    | <i>Ca_Kabuli_denovo</i>      | 1745745                        | (C/T)       |
| 17850       | CakSNP17850    | <i>Kabuli</i>    | <i>Ca_Kabuli_denovo</i>      | 1745967                        | (G/T)       |
| 17851       | CakSNP17851    | <i>Kabuli</i>    | <i>Ca_Kabuli_denovo</i>      | 1773627                        | (C/T)       |
| 17852       | CakSNP17852    | <i>Kabuli</i>    | <i>Ca_Kabuli_denovo</i>      | 1773675                        | (T/G)       |
| 17853       | CakSNP17853    | <i>Kabuli</i>    | <i>Ca_Kabuli_denovo</i>      | 1778702                        | (T/A)       |
| 17854       | CakSNP17854    | <i>Kabuli</i>    | <i>Ca_Kabuli_denovo</i>      | 1778708                        | (G/A)       |
| 17855       | CakSNP17855    | <i>Kabuli</i>    | <i>Ca_Kabuli_denovo</i>      | 1782502                        | (C/T)       |
| 17856       | CakSNP17856    | <i>Kabuli</i>    | <i>Ca_Kabuli_denovo</i>      | 1782521                        | (T/C)       |
| 17857       | CakSNP17857    | <i>Kabuli</i>    | <i>Ca_Kabuli_denovo</i>      | 1785710                        | (T/C)       |
| 17858       | CakSNP17858    | <i>Kabuli</i>    | <i>Ca_Kabuli_denovo</i>      | 1799281                        | (G/T)       |
| 17859       | CakSNP17859    | <i>Kabuli</i>    | <i>Ca_Kabuli_denovo</i>      | 1835504                        | (G/A)       |
| 17860       | CakSNP17860    | <i>Kabuli</i>    | <i>Ca_Kabuli_denovo</i>      | 1848623                        | (T/C)       |

| <b>S.N.</b> | <b>SNP IDs</b> | <b>Cultivars</b> | <b>Chromosomes/scaffolds</b> | <b>Physical positions (bp)</b> | <b>SNPs</b> |
|-------------|----------------|------------------|------------------------------|--------------------------------|-------------|
| 17861       | CakSNP17861    | <i>Kabuli</i>    | <i>Ca_Kabuli_denovo</i>      | 1865044                        | (C/G)       |
| 17862       | CakSNP17862    | <i>Kabuli</i>    | <i>Ca_Kabuli_denovo</i>      | 1865051                        | (T/C)       |
| 17863       | CakSNP17863    | <i>Kabuli</i>    | <i>Ca_Kabuli_denovo</i>      | 1877655                        | (A/C)       |
| 17864       | CakSNP17864    | <i>Kabuli</i>    | <i>Ca_Kabuli_denovo</i>      | 1885551                        | (C/T)       |
| 17865       | CakSNP17865    | <i>Kabuli</i>    | <i>Ca_Kabuli_denovo</i>      | 1885575                        | (G/A)       |
| 17866       | CakSNP17866    | <i>Kabuli</i>    | <i>Ca_Kabuli_denovo</i>      | 1892464                        | (C/T)       |
| 17867       | CakSNP17867    | <i>Kabuli</i>    | <i>Ca_Kabuli_denovo</i>      | 1892470                        | (A/T)       |
| 17868       | CakSNP17868    | <i>Kabuli</i>    | <i>Ca_Kabuli_denovo</i>      | 1898838                        | (A/G)       |
| 17869       | CakSNP17869    | <i>Kabuli</i>    | <i>Ca_Kabuli_denovo</i>      | 1898842                        | (G/A)       |
| 17870       | CakSNP17870    | <i>Kabuli</i>    | <i>Ca_Kabuli_denovo</i>      | 1907169                        | (C/T)       |
| 17871       | CakSNP17871    | <i>Kabuli</i>    | <i>Ca_Kabuli_denovo</i>      | 1954938                        | (C/T)       |
| 17872       | CakSNP17872    | <i>Kabuli</i>    | <i>Ca_Kabuli_denovo</i>      | 1973101                        | (A/C)       |
| 17873       | CakSNP17873    | <i>Kabuli</i>    | <i>Ca_Kabuli_denovo</i>      | 1981659                        | (C/G)       |
| 17874       | CakSNP17874    | <i>Kabuli</i>    | <i>Ca_Kabuli_denovo</i>      | 1981685                        | (C/T)       |
| 17875       | CakSNP17875    | <i>Kabuli</i>    | <i>Ca_Kabuli_denovo</i>      | 2017269                        | (C/T)       |
| 17876       | CakSNP17876    | <i>Kabuli</i>    | <i>Ca_Kabuli_denovo</i>      | 2017293                        | (G/A)       |
| 17877       | CakSNP17877    | <i>Kabuli</i>    | <i>Ca_Kabuli_denovo</i>      | 2082507                        | (C/T)       |
| 17878       | CakSNP17878    | <i>Kabuli</i>    | <i>Ca_Kabuli_denovo</i>      | 2082510                        | (T/C)       |
| 17879       | CakSNP17879    | <i>Kabuli</i>    | <i>Ca_Kabuli_denovo</i>      | 2083031                        | (G/C)       |
| 17880       | CakSNP17880    | <i>Kabuli</i>    | <i>Ca_Kabuli_denovo</i>      | 2083034                        | (G/A)       |
| 17881       | CakSNP17881    | <i>Kabuli</i>    | <i>Ca_Kabuli_denovo</i>      | 2083043                        | (T/G)       |
| 17882       | CakSNP17882    | <i>Kabuli</i>    | <i>Ca_Kabuli_denovo</i>      | 2086223                        | (A/C)       |
| 17883       | CakSNP17883    | <i>Kabuli</i>    | <i>Ca_Kabuli_denovo</i>      | 2089458                        | (A/G)       |
| 17884       | CakSNP17884    | <i>Kabuli</i>    | <i>Ca_Kabuli_denovo</i>      | 2089483                        | (G/C)       |
| 17885       | CakSNP17885    | <i>Kabuli</i>    | <i>Ca_Kabuli_denovo</i>      | 2103496                        | (C/G)       |
| 17886       | CakSNP17886    | <i>Kabuli</i>    | <i>Ca_Kabuli_denovo</i>      | 2117543                        | (A/G)       |
| 17887       | CakSNP17887    | <i>Kabuli</i>    | <i>Ca_Kabuli_denovo</i>      | 2179176                        | (A/C)       |
| 17888       | CakSNP17888    | <i>Kabuli</i>    | <i>Ca_Kabuli_denovo</i>      | 2196538                        | (T/A)       |
| 17889       | CakSNP17889    | <i>Kabuli</i>    | <i>Ca_Kabuli_denovo</i>      | 2196959                        | (G/A)       |
| 17890       | CakSNP17890    | <i>Kabuli</i>    | <i>Ca_Kabuli_denovo</i>      | 2196969                        | (G/A)       |
| 17891       | CakSNP17891    | <i>Kabuli</i>    | <i>Ca_Kabuli_denovo</i>      | 2204023                        | (C/T)       |
| 17892       | CakSNP17892    | <i>Kabuli</i>    | <i>Ca_Kabuli_denovo</i>      | 2212621                        | (C/T)       |
| 17893       | CakSNP17893    | <i>Kabuli</i>    | <i>Ca_Kabuli_denovo</i>      | 2212895                        | (C/T)       |
| 17894       | CakSNP17894    | <i>Kabuli</i>    | <i>Ca_Kabuli_denovo</i>      | 2238931                        | (C/T)       |
| 17895       | CakSNP17895    | <i>Kabuli</i>    | <i>Ca_Kabuli_denovo</i>      | 2238976                        | (C/T)       |
| 17896       | CakSNP17896    | <i>Kabuli</i>    | <i>Ca_Kabuli_denovo</i>      | 2272968                        | (G/A)       |
| 17897       | CakSNP17897    | <i>Kabuli</i>    | <i>Ca_Kabuli_denovo</i>      | 2289863                        | (C/A)       |
| 17898       | CakSNP17898    | <i>Kabuli</i>    | <i>Ca_Kabuli_denovo</i>      | 2329264                        | (G/A)       |
| 17899       | CakSNP17899    | <i>Kabuli</i>    | <i>Ca_Kabuli_denovo</i>      | 2339668                        | (G/A)       |

| <b>S.N.</b> | <b>SNP IDs</b> | <b>Cultivars</b> | <b>Chromosomes/scaffolds</b> | <b>Physical positions (bp)</b> | <b>SNPs</b> |
|-------------|----------------|------------------|------------------------------|--------------------------------|-------------|
| 17900       | CakSNP17900    | <i>Kabuli</i>    | <i>Ca_Kabuli_denovo</i>      | 2345594                        | (A/T)       |
| 17901       | CakSNP17901    | <i>Kabuli</i>    | <i>Ca_Kabuli_denovo</i>      | 2349919                        | (G/T)       |
| 17902       | CakSNP17902    | <i>Kabuli</i>    | <i>Ca_Kabuli_denovo</i>      | 2349923                        | (T/G)       |
| 17903       | CakSNP17903    | <i>Kabuli</i>    | <i>Ca_Kabuli_denovo</i>      | 2352980                        | (T/G)       |
| 17904       | CakSNP17904    | <i>Kabuli</i>    | <i>Ca_Kabuli_denovo</i>      | 2368635                        | (A/T)       |
| 17905       | CakSNP17905    | <i>Kabuli</i>    | <i>Ca_Kabuli_denovo</i>      | 2377565                        | (G/T)       |
| 17906       | CakSNP17906    | <i>Kabuli</i>    | <i>Ca_Kabuli_denovo</i>      | 2378145                        | (G/A)       |
| 17907       | CakSNP17907    | <i>Kabuli</i>    | <i>Ca_Kabuli_denovo</i>      | 2422055                        | (G/A)       |
| 17908       | CakSNP17908    | <i>Kabuli</i>    | <i>Ca_Kabuli_denovo</i>      | 2424690                        | (C/T)       |
| 17909       | CakSNP17909    | <i>Kabuli</i>    | <i>Ca_Kabuli_denovo</i>      | 2436733                        | (T/G)       |
| 17910       | CakSNP17910    | <i>Kabuli</i>    | <i>Ca_Kabuli_denovo</i>      | 2442765                        | (G/C)       |
| 17911       | CakSNP17911    | <i>Kabuli</i>    | <i>Ca_Kabuli_denovo</i>      | 2472151                        | (C/G)       |
| 17912       | CakSNP17912    | <i>Kabuli</i>    | <i>Ca_Kabuli_denovo</i>      | 2472157                        | (T/C)       |
| 17913       | CakSNP17913    | <i>Kabuli</i>    | <i>Ca_Kabuli_denovo</i>      | 2472160                        | (A/C)       |
| 17914       | CakSNP17914    | <i>Kabuli</i>    | <i>Ca_Kabuli_denovo</i>      | 2481362                        | (C/G)       |
| 17915       | CakSNP17915    | <i>Kabuli</i>    | <i>Ca_Kabuli_denovo</i>      | 2481371                        | (G/C)       |
| 17916       | CakSNP17916    | <i>Kabuli</i>    | <i>Ca_Kabuli_denovo</i>      | 2484130                        | (G/C)       |
| 17917       | CakSNP17917    | <i>Kabuli</i>    | <i>Ca_Kabuli_denovo</i>      | 2493981                        | (A/C)       |
| 17918       | CakSNP17918    | <i>Kabuli</i>    | <i>Ca_Kabuli_denovo</i>      | 2521639                        | (T/C)       |
| 17919       | CakSNP17919    | <i>Kabuli</i>    | <i>Ca_Kabuli_denovo</i>      | 2532212                        | (C/T)       |
| 17920       | CakSNP17920    | <i>Kabuli</i>    | <i>Ca_Kabuli_denovo</i>      | 2534679                        | (T/C)       |
| 17921       | CakSNP17921    | <i>Kabuli</i>    | <i>Ca_Kabuli_denovo</i>      | 2543790                        | (C/G)       |
| 17922       | CakSNP17922    | <i>Kabuli</i>    | <i>Ca_Kabuli_denovo</i>      | 2543805                        | (G/A)       |
| 17923       | CakSNP17923    | <i>Kabuli</i>    | <i>Ca_Kabuli_denovo</i>      | 2557532                        | (T/G)       |
| 17924       | CakSNP17924    | <i>Kabuli</i>    | <i>Ca_Kabuli_denovo</i>      | 2566186                        | (C/T)       |
| 17925       | CakSNP17925    | <i>Kabuli</i>    | <i>Ca_Kabuli_denovo</i>      | 2586184                        | (T/C)       |
| 17926       | CakSNP17926    | <i>Kabuli</i>    | <i>Ca_Kabuli_denovo</i>      | 2596306                        | (G/A)       |
| 17927       | CakSNP17927    | <i>Kabuli</i>    | <i>Ca_Kabuli_denovo</i>      | 2599278                        | (C/T)       |
| 17928       | CakSNP17928    | <i>Kabuli</i>    | <i>Ca_Kabuli_denovo</i>      | 2599284                        | (T/C)       |
| 17929       | CakSNP17929    | <i>Kabuli</i>    | <i>Ca_Kabuli_denovo</i>      | 2810251                        | (C/G)       |
| 17930       | CakSNP17930    | <i>Kabuli</i>    | <i>Ca_Kabuli_denovo</i>      | 2822788                        | (C/T)       |
| 17931       | CakSNP17931    | <i>Kabuli</i>    | <i>Ca_Kabuli_denovo</i>      | 2822794                        | (G/A)       |
| 17932       | CakSNP17932    | <i>Kabuli</i>    | <i>Ca_Kabuli_denovo</i>      | 2841190                        | (C/G)       |
| 17933       | CakSNP17933    | <i>Kabuli</i>    | <i>Ca_Kabuli_denovo</i>      | 2899276                        | (A/G)       |
| 17934       | CakSNP17934    | <i>Kabuli</i>    | <i>Ca_Kabuli_denovo</i>      | 2905320                        | (A/C)       |
| 17935       | CakSNP17935    | <i>Kabuli</i>    | <i>Ca_Kabuli_denovo</i>      | 2920107                        | (A/C)       |
| 17936       | CakSNP17936    | <i>Kabuli</i>    | <i>Ca_Kabuli_denovo</i>      | 2943170                        | (A/C)       |
| 17937       | CakSNP17937    | <i>Kabuli</i>    | <i>Ca_Kabuli_denovo</i>      | 2950044                        | (T/C)       |
| 17938       | CakSNP17938    | <i>Kabuli</i>    | <i>Ca_Kabuli_denovo</i>      | 2967013                        | (A/G)       |

| <b>S.N.</b> | <b>SNP IDs</b> | <b>Cultivars</b> | <b>Chromosomes/scaffolds</b> | <b>Physical positions (bp)</b> | <b>SNPs</b> |
|-------------|----------------|------------------|------------------------------|--------------------------------|-------------|
| 17939       | CakSNP17939    | <i>Kabuli</i>    | <i>Ca_Kabuli_denovo</i>      | 2986733                        | (G/C)       |
| 17940       | CakSNP17940    | <i>Kabuli</i>    | <i>Ca_Kabuli_denovo</i>      | 2988473                        | (G/A)       |
| 17941       | CakSNP17941    | <i>Kabuli</i>    | <i>Ca_Kabuli_denovo</i>      | 3002912                        | (G/C)       |
| 17942       | CakSNP17942    | <i>Kabuli</i>    | <i>Ca_Kabuli_denovo</i>      | 3004600                        | (C/G)       |
| 17943       | CakSNP17943    | <i>Kabuli</i>    | <i>Ca_Kabuli_denovo</i>      | 3028757                        | (A/G)       |
| 17944       | CakSNP17944    | <i>Kabuli</i>    | <i>Ca_Kabuli_denovo</i>      | 3058052                        | (G/A)       |
| 17945       | CakSNP17945    | <i>Kabuli</i>    | <i>Ca_Kabuli_denovo</i>      | 3067960                        | (A/G)       |
| 17946       | CakSNP17946    | <i>Kabuli</i>    | <i>Ca_Kabuli_denovo</i>      | 3075746                        | (C/G)       |
| 17947       | CakSNP17947    | <i>Kabuli</i>    | <i>Ca_Kabuli_denovo</i>      | 3075749                        | (A/G)       |
| 17948       | CakSNP17948    | <i>Kabuli</i>    | <i>Ca_Kabuli_denovo</i>      | 3082312                        | (T/A)       |
| 17949       | CakSNP17949    | <i>Kabuli</i>    | <i>Ca_Kabuli_denovo</i>      | 3102755                        | (C/T)       |
| 17950       | CakSNP17950    | <i>Kabuli</i>    | <i>Ca_Kabuli_denovo</i>      | 3112730                        | (C/T)       |
| 17951       | CakSNP17951    | <i>Kabuli</i>    | <i>Ca_Kabuli_denovo</i>      | 3119860                        | (G/A)       |
| 17952       | CakSNP17952    | <i>Kabuli</i>    | <i>Ca_Kabuli_denovo</i>      | 3119864                        | (A/G)       |
| 17953       | CakSNP17953    | <i>Kabuli</i>    | <i>Ca_Kabuli_denovo</i>      | 3122405                        | (A/G)       |
| 17954       | CakSNP17954    | <i>Kabuli</i>    | <i>Ca_Kabuli_denovo</i>      | 3158126                        | (G/T)       |
| 17955       | CakSNP17955    | <i>Kabuli</i>    | <i>Ca_Kabuli_denovo</i>      | 3158176                        | (G/A)       |
| 17956       | CakSNP17956    | <i>Kabuli</i>    | <i>Ca_Kabuli_denovo</i>      | 3195629                        | (G/A)       |
| 17957       | CakSNP17957    | <i>Kabuli</i>    | <i>Ca_Kabuli_denovo</i>      | 3234354                        | (G/A)       |
| 17958       | CakSNP17958    | <i>Kabuli</i>    | <i>Ca_Kabuli_denovo</i>      | 3236873                        | (A/G)       |
| 17959       | CakSNP17959    | <i>Kabuli</i>    | <i>Ca_Kabuli_denovo</i>      | 3236875                        | (T/C)       |
| 17960       | CakSNP17960    | <i>Kabuli</i>    | <i>Ca_Kabuli_denovo</i>      | 3236878                        | (T/G)       |
| 17961       | CakSNP17961    | <i>Kabuli</i>    | <i>Ca_Kabuli_denovo</i>      | 3303558                        | (A/C)       |
| 17962       | CakSNP17962    | <i>Kabuli</i>    | <i>Ca_Kabuli_denovo</i>      | 3303631                        | (G/C)       |
| 17963       | CakSNP17963    | <i>Kabuli</i>    | <i>Ca_Kabuli_denovo</i>      | 3315370                        | (A/G)       |
| 17964       | CakSNP17964    | <i>Kabuli</i>    | <i>Ca_Kabuli_denovo</i>      | 3315379                        | (A/G)       |
| 17965       | CakSNP17965    | <i>Kabuli</i>    | <i>Ca_Kabuli_denovo</i>      | 3366344                        | (C/T)       |
| 17966       | CakSNP17966    | <i>Kabuli</i>    | <i>Ca_Kabuli_denovo</i>      | 3366389                        | (G/T)       |
| 17967       | CakSNP17967    | <i>Kabuli</i>    | <i>Ca_Kabuli_denovo</i>      | 3376003                        | (A/G)       |
| 17968       | CakSNP17968    | <i>Kabuli</i>    | <i>Ca_Kabuli_denovo</i>      | 3376309                        | (T/C)       |
| 17969       | CakSNP17969    | <i>Kabuli</i>    | <i>Ca_Kabuli_denovo</i>      | 3381616                        | (T/C)       |
| 17970       | CakSNP17970    | <i>Kabuli</i>    | <i>Ca_Kabuli_denovo</i>      | 3383148                        | (T/C)       |
| 17971       | CakSNP17971    | <i>Kabuli</i>    | <i>Ca_Kabuli_denovo</i>      | 3397038                        | (T/C)       |
| 17972       | CakSNP17972    | <i>Kabuli</i>    | <i>Ca_Kabuli_denovo</i>      | 3401848                        | (A/C)       |
| 17973       | CakSNP17973    | <i>Kabuli</i>    | <i>Ca_Kabuli_denovo</i>      | 3419633                        | (C/G)       |
| 17974       | CakSNP17974    | <i>Kabuli</i>    | <i>Ca_Kabuli_denovo</i>      | 3427074                        | (A/G)       |
| 17975       | CakSNP17975    | <i>Kabuli</i>    | <i>Ca_Kabuli_denovo</i>      | 3438889                        | (C/T)       |
| 17976       | CakSNP17976    | <i>Kabuli</i>    | <i>Ca_Kabuli_denovo</i>      | 3520157                        | (T/C)       |
| 17977       | CakSNP17977    | <i>Kabuli</i>    | <i>Ca_Kabuli_denovo</i>      | 3520187                        | (A/G)       |

| <b>S.N.</b> | <b>SNP IDs</b> | <b>Cultivars</b> | <b>Chromosomes/scaffolds</b> | <b>Physical positions (bp)</b> | <b>SNPs</b> |
|-------------|----------------|------------------|------------------------------|--------------------------------|-------------|
| 17978       | CakSNP17978    | <i>Kabuli</i>    | <i>Ca_Kabuli_denovo</i>      | 3563125                        | (C/T)       |
| 17979       | CakSNP17979    | <i>Kabuli</i>    | <i>Ca_Kabuli_denovo</i>      | 3569168                        | (A/G)       |
| 17980       | CakSNP17980    | <i>Kabuli</i>    | <i>Ca_Kabuli_denovo</i>      | 3569183                        | (A/G)       |
| 17981       | CakSNP17981    | <i>Kabuli</i>    | <i>Ca_Kabuli_denovo</i>      | 3593979                        | (G/T)       |
| 17982       | CakSNP17982    | <i>Kabuli</i>    | <i>Ca_Kabuli_denovo</i>      | 3608269                        | (C/T)       |
| 17983       | CakSNP17983    | <i>Kabuli</i>    | <i>Ca_Kabuli_denovo</i>      | 3608277                        | (G/T)       |
| 17984       | CakSNP17984    | <i>Kabuli</i>    | <i>Ca_Kabuli_denovo</i>      | 3619659                        | (C/T)       |
| 17985       | CakSNP17985    | <i>Kabuli</i>    | <i>Ca_Kabuli_denovo</i>      | 3619740                        | (A/G)       |
| 17986       | CakSNP17986    | <i>Kabuli</i>    | <i>Ca_Kabuli_denovo</i>      | 3621163                        | (G/A)       |
| 17987       | CakSNP17987    | <i>Kabuli</i>    | <i>Ca_Kabuli_denovo</i>      | 3621166                        | (T/G)       |
| 17988       | CakSNP17988    | <i>Kabuli</i>    | <i>Ca_Kabuli_denovo</i>      | 3627246                        | (T/A)       |
| 17989       | CakSNP17989    | <i>Kabuli</i>    | <i>Ca_Kabuli_denovo</i>      | 3640534                        | (G/A)       |
| 17990       | CakSNP17990    | <i>Kabuli</i>    | <i>Ca_Kabuli_denovo</i>      | 3640537                        | (A/G)       |
| 17991       | CakSNP17991    | <i>Kabuli</i>    | <i>Ca_Kabuli_denovo</i>      | 3643962                        | (C/T)       |
| 17992       | CakSNP17992    | <i>Kabuli</i>    | <i>Ca_Kabuli_denovo</i>      | 3649832                        | (T/G)       |
| 17993       | CakSNP17993    | <i>Kabuli</i>    | <i>Ca_Kabuli_denovo</i>      | 3649844                        | (A/G)       |
| 17994       | CakSNP17994    | <i>Kabuli</i>    | <i>Ca_Kabuli_denovo</i>      | 3656017                        | (A/C)       |
| 17995       | CakSNP17995    | <i>Kabuli</i>    | <i>Ca_Kabuli_denovo</i>      | 3733774                        | (C/T)       |
| 17996       | CakSNP17996    | <i>Kabuli</i>    | <i>Ca_Kabuli_denovo</i>      | 3733795                        | (C/G)       |
| 17997       | CakSNP17997    | <i>Kabuli</i>    | <i>Ca_Kabuli_denovo</i>      | 3733959                        | (G/A)       |
| 17998       | CakSNP17998    | <i>Kabuli</i>    | <i>Ca_Kabuli_denovo</i>      | 3865215                        | (A/G)       |
| 17999       | CakSNP17999    | <i>Kabuli</i>    | <i>Ca_Kabuli_denovo</i>      | 3882576                        | (G/A)       |
| 18000       | CakSNP18000    | <i>Kabuli</i>    | <i>Ca_Kabuli_denovo</i>      | 3882602                        | (G/C)       |
| 18001       | CakSNP18001    | <i>Kabuli</i>    | <i>Ca_Kabuli_denovo</i>      | 3891592                        | (A/G)       |
| 18002       | CakSNP18002    | <i>Kabuli</i>    | <i>Ca_Kabuli_denovo</i>      | 3926567                        | (T/C)       |
| 18003       | CakSNP18003    | <i>Kabuli</i>    | <i>Ca_Kabuli_denovo</i>      | 3932481                        | (T/A)       |
| 18004       | CakSNP18004    | <i>Kabuli</i>    | <i>Ca_Kabuli_denovo</i>      | 3962628                        | (C/A)       |
| 18005       | CakSNP18005    | <i>Kabuli</i>    | <i>Ca_Kabuli_denovo</i>      | 3971486                        | (C/G)       |
| 18006       | CakSNP18006    | <i>Kabuli</i>    | <i>Ca_Kabuli_denovo</i>      | 3971511                        | (T/C)       |
| 18007       | CakSNP18007    | <i>Kabuli</i>    | <i>Ca_Kabuli_denovo</i>      | 3985191                        | (G/A)       |
| 18008       | CakSNP18008    | <i>Kabuli</i>    | <i>Ca_Kabuli_denovo</i>      | 3985194                        | (C/T)       |
| 18009       | CakSNP18009    | <i>Kabuli</i>    | <i>Ca_Kabuli_denovo</i>      | 3988996                        | (G/C)       |
| 18010       | CakSNP18010    | <i>Kabuli</i>    | <i>Ca_Kabuli_denovo</i>      | 3989017                        | (G/A)       |
| 18011       | CakSNP18011    | <i>Kabuli</i>    | <i>Ca_Kabuli_denovo</i>      | 4058620                        | (G/C)       |
| 18012       | CakSNP18012    | <i>Kabuli</i>    | <i>Ca_Kabuli_denovo</i>      | 4058680                        | (A/C)       |
| 18013       | CakSNP18013    | <i>Kabuli</i>    | <i>Ca_Kabuli_denovo</i>      | 4069641                        | (G/C)       |
| 18014       | CakSNP18014    | <i>Kabuli</i>    | <i>Ca_Kabuli_denovo</i>      | 4069659                        | (C/T)       |
| 18015       | CakSNP18015    | <i>Kabuli</i>    | <i>Ca_Kabuli_denovo</i>      | 4074763                        | (A/G)       |
| 18016       | CakSNP18016    | <i>Kabuli</i>    | <i>Ca_Kabuli_denovo</i>      | 4074764                        | (C/G)       |

| <b>S.N.</b> | <b>SNP IDs</b> | <b>Cultivars</b> | <b>Chromosomes/scaffolds</b> | <b>Physical positions (bp)</b> | <b>SNPs</b> |
|-------------|----------------|------------------|------------------------------|--------------------------------|-------------|
| 18017       | CakSNP18017    | <i>Kabuli</i>    | <i>Ca_Kabuli_denovo</i>      | 4102951                        | (A/G)       |
| 18018       | CakSNP18018    | <i>Kabuli</i>    | <i>Ca_Kabuli_denovo</i>      | 4131618                        | (A/C)       |
| 18019       | CakSNP18019    | <i>Kabuli</i>    | <i>Ca_Kabuli_denovo</i>      | 4327961                        | (T/C)       |
| 18020       | CakSNP18020    | <i>Kabuli</i>    | <i>Ca_Kabuli_denovo</i>      | 4354794                        | (C/T)       |
| 18021       | CakSNP18021    | <i>Kabuli</i>    | <i>Ca_Kabuli_denovo</i>      | 4354804                        | (C/T)       |
| 18022       | CakSNP18022    | <i>Kabuli</i>    | <i>Ca_Kabuli_denovo</i>      | 4384538                        | (T/C)       |
| 18023       | CakSNP18023    | <i>Kabuli</i>    | <i>Ca_Kabuli_denovo</i>      | 4423469                        | (A/G)       |
| 18024       | CakSNP18024    | <i>Kabuli</i>    | <i>Ca_Kabuli_denovo</i>      | 4423478                        | (C/G)       |
| 18025       | CakSNP18025    | <i>Kabuli</i>    | <i>Ca_Kabuli_denovo</i>      | 4462086                        | (C/A)       |
| 18026       | CakSNP18026    | <i>Kabuli</i>    | <i>Ca_Kabuli_denovo</i>      | 4531890                        | (A/C)       |
| 18027       | CakSNP18027    | <i>Kabuli</i>    | <i>Ca_Kabuli_denovo</i>      | 4533618                        | (T/C)       |
| 18028       | CakSNP18028    | <i>Kabuli</i>    | <i>Ca_Kabuli_denovo</i>      | 4565146                        | (G/A)       |
| 18029       | CakSNP18029    | <i>Kabuli</i>    | <i>Ca_Kabuli_denovo</i>      | 4575382                        | (C/T)       |
| 18030       | CakSNP18030    | <i>Kabuli</i>    | <i>Ca_Kabuli_denovo</i>      | 4581997                        | (C/G)       |
| 18031       | CakSNP18031    | <i>Kabuli</i>    | <i>Ca_Kabuli_denovo</i>      | 4581998                        | (C/A)       |
| 18032       | CakSNP18032    | <i>Kabuli</i>    | <i>Ca_Kabuli_denovo</i>      | 4633334                        | (G/A)       |
| 18033       | CakSNP18033    | <i>Kabuli</i>    | <i>Ca_Kabuli_denovo</i>      | 4634189                        | (A/C)       |
| 18034       | CakSNP18034    | <i>Kabuli</i>    | <i>Ca_Kabuli_denovo</i>      | 4645619                        | (G/A)       |
| 18035       | CakSNP18035    | <i>Kabuli</i>    | <i>Ca_Kabuli_denovo</i>      | 4659307                        | (G/C)       |
| 18036       | CakSNP18036    | <i>Kabuli</i>    | <i>Ca_Kabuli_denovo</i>      | 4659309                        | (C/A)       |
| 18037       | CakSNP18037    | <i>Kabuli</i>    | <i>Ca_Kabuli_denovo</i>      | 4659328                        | (G/A)       |
| 18038       | CakSNP18038    | <i>Kabuli</i>    | <i>Ca_Kabuli_denovo</i>      | 4704245                        | (G/A)       |
| 18039       | CakSNP18039    | <i>Kabuli</i>    | <i>Ca_Kabuli_denovo</i>      | 4704305                        | (C/T)       |
| 18040       | CakSNP18040    | <i>Kabuli</i>    | <i>Ca_Kabuli_denovo</i>      | 4738377                        | (T/A)       |
| 18041       | CakSNP18041    | <i>Kabuli</i>    | <i>Ca_Kabuli_denovo</i>      | 4738379                        | (G/T)       |
| 18042       | CakSNP18042    | <i>Kabuli</i>    | <i>Ca_Kabuli_denovo</i>      | 4738831                        | (G/A)       |
| 18043       | CakSNP18043    | <i>Kabuli</i>    | <i>Ca_Kabuli_denovo</i>      | 4756479                        | (G/A)       |
| 18044       | CakSNP18044    | <i>Kabuli</i>    | <i>Ca_Kabuli_denovo</i>      | 4763483                        | (C/A)       |
| 18045       | CakSNP18045    | <i>Kabuli</i>    | <i>Ca_Kabuli_denovo</i>      | 4769505                        | (C/A)       |
| 18046       | CakSNP18046    | <i>Kabuli</i>    | <i>Ca_Kabuli_denovo</i>      | 4769506                        | (A/G)       |
| 18047       | CakSNP18047    | <i>Kabuli</i>    | <i>Ca_Kabuli_denovo</i>      | 4779386                        | (G/T)       |
| 18048       | CakSNP18048    | <i>Kabuli</i>    | <i>Ca_Kabuli_denovo</i>      | 4779389                        | (G/A)       |
| 18049       | CakSNP18049    | <i>Kabuli</i>    | <i>Ca_Kabuli_denovo</i>      | 4801328                        | (G/A)       |
| 18050       | CakSNP18050    | <i>Kabuli</i>    | <i>Ca_Kabuli_denovo</i>      | 4801337                        | (G/A)       |
| 18051       | CakSNP18051    | <i>Kabuli</i>    | <i>Ca_Kabuli_denovo</i>      | 4801346                        | (C/T)       |
| 18052       | CakSNP18052    | <i>Kabuli</i>    | <i>Ca_Kabuli_denovo</i>      | 4804447                        | (A/G)       |
| 18053       | CakSNP18053    | <i>Kabuli</i>    | <i>Ca_Kabuli_denovo</i>      | 4829417                        | (G/C)       |
| 18054       | CakSNP18054    | <i>Kabuli</i>    | <i>Ca_Kabuli_denovo</i>      | 4829418                        | (T/C)       |
| 18055       | CakSNP18055    | <i>Kabuli</i>    | <i>Ca_Kabuli_denovo</i>      | 4837576                        | (C/T)       |



| <b>S.N.</b> | <b>SNP IDs</b> | <b>Cultivars</b> | <b>Chromosomes/scaffolds</b> | <b>Physical positions (bp)</b> | <b>SNPs</b> |
|-------------|----------------|------------------|------------------------------|--------------------------------|-------------|
| 18056       | CakSNP18056    | <i>Kabuli</i>    | <i>Ca_Kabuli_denovo</i>      | 4848221                        | (C/T)       |
| 18057       | CakSNP18057    | <i>Kabuli</i>    | <i>Ca_Kabuli_denovo</i>      | 4848227                        | (G/A)       |
| 18058       | CakSNP18058    | <i>Kabuli</i>    | <i>Ca_Kabuli_denovo</i>      | 4849347                        | (C/G)       |
| 18059       | CakSNP18059    | <i>Kabuli</i>    | <i>Ca_Kabuli_denovo</i>      | 4870801                        | (G/A)       |
| 18060       | CakSNP18060    | <i>Kabuli</i>    | <i>Ca_Kabuli_denovo</i>      | 4910257                        | (G/A)       |
| 18061       | CakSNP18061    | <i>Kabuli</i>    | <i>Ca_Kabuli_denovo</i>      | 4931630                        | (C/T)       |
| 18062       | CakSNP18062    | <i>Kabuli</i>    | <i>Ca_Kabuli_denovo</i>      | 4956229                        | (A/G)       |
| 18063       | CakSNP18063    | <i>Kabuli</i>    | <i>Ca_Kabuli_denovo</i>      | 4970754                        | (A/C)       |
| 18064       | CakSNP18064    | <i>Kabuli</i>    | <i>Ca_Kabuli_denovo</i>      | 4984720                        | (G/A)       |
| 18065       | CakSNP18065    | <i>Kabuli</i>    | <i>Ca_Kabuli_denovo</i>      | 4984729                        | (C/T)       |
| 18066       | CakSNP18066    | <i>Kabuli</i>    | <i>Ca_Kabuli_denovo</i>      | 4986581                        | (T/C)       |
| 18067       | CakSNP18067    | <i>Kabuli</i>    | <i>Ca_Kabuli_denovo</i>      | 4997664                        | (G/A)       |
| 18068       | CakSNP18068    | <i>Kabuli</i>    | <i>Ca_Kabuli_denovo</i>      | 4999327                        | (A/G)       |
| 18069       | CakSNP18069    | <i>Kabuli</i>    | <i>Ca_Kabuli_denovo</i>      | 4999329                        | (G/A)       |
| 18070       | CakSNP18070    | <i>Kabuli</i>    | <i>Ca_Kabuli_denovo</i>      | 4999334                        | (G/C)       |
| 18071       | CakSNP18071    | <i>Kabuli</i>    | <i>Ca_Kabuli_denovo</i>      | 4999336                        | (C/G)       |
| 18072       | CakSNP18072    | <i>Kabuli</i>    | <i>Ca_Kabuli_denovo</i>      | 4999337                        | (A/C)       |
| 18073       | CakSNP18073    | <i>Kabuli</i>    | <i>Ca_Kabuli_denovo</i>      | 4999367                        | (T/G)       |
| 18074       | CakSNP18074    | <i>Kabuli</i>    | <i>Ca_Kabuli_denovo</i>      | 5021916                        | (A/T)       |
| 18075       | CakSNP18075    | <i>Kabuli</i>    | <i>Ca_Kabuli_denovo</i>      | 5021954                        | (C/T)       |
| 18076       | CakSNP18076    | <i>Kabuli</i>    | <i>Ca_Kabuli_denovo</i>      | 5036439                        | (C/A)       |
| 18077       | CakSNP18077    | <i>Kabuli</i>    | <i>Ca_Kabuli_denovo</i>      | 5085488                        | (C/T)       |
| 18078       | CakSNP18078    | <i>Kabuli</i>    | <i>Ca_Kabuli_denovo</i>      | 5104591                        | (A/G)       |
| 18079       | CakSNP18079    | <i>Kabuli</i>    | <i>Ca_Kabuli_denovo</i>      | 5109203                        | (T/C)       |
| 18080       | CakSNP18080    | <i>Kabuli</i>    | <i>Ca_Kabuli_denovo</i>      | 5128398                        | (C/G)       |
| 18081       | CakSNP18081    | <i>Kabuli</i>    | <i>Ca_Kabuli_denovo</i>      | 5128413                        | (A/G)       |
| 18082       | CakSNP18082    | <i>Kabuli</i>    | <i>Ca_Kabuli_denovo</i>      | 5154944                        | (C/G)       |
| 18083       | CakSNP18083    | <i>Kabuli</i>    | <i>Ca_Kabuli_denovo</i>      | 5155600                        | (C/G)       |
| 18084       | CakSNP18084    | <i>Kabuli</i>    | <i>Ca_Kabuli_denovo</i>      | 5191898                        | (C/T)       |
| 18085       | CakSNP18085    | <i>Kabuli</i>    | <i>Ca_Kabuli_denovo</i>      | 5196708                        | (T/A)       |
| 18086       | CakSNP18086    | <i>Kabuli</i>    | <i>Ca_Kabuli_denovo</i>      | 5229436                        | (G/C)       |
| 18087       | CakSNP18087    | <i>Kabuli</i>    | <i>Ca_Kabuli_denovo</i>      | 5230153                        | (C/G)       |
| 18088       | CakSNP18088    | <i>Kabuli</i>    | <i>Ca_Kabuli_denovo</i>      | 5230160                        | (T/C)       |
| 18089       | CakSNP18089    | <i>Kabuli</i>    | <i>Ca_Kabuli_denovo</i>      | 5236751                        | (G/A)       |
| 18090       | CakSNP18090    | <i>Kabuli</i>    | <i>Ca_Kabuli_denovo</i>      | 5236789                        | (T/A)       |
| 18091       | CakSNP18091    | <i>Kabuli</i>    | <i>Ca_Kabuli_denovo</i>      | 5238535                        | (T/A)       |
| 18092       | CakSNP18092    | <i>Kabuli</i>    | <i>Ca_Kabuli_denovo</i>      | 5238598                        | (A/G)       |
| 18093       | CakSNP18093    | <i>Kabuli</i>    | <i>Ca_Kabuli_denovo</i>      | 5263444                        | (C/T)       |
| 18094       | CakSNP18094    | <i>Kabuli</i>    | <i>Ca_Kabuli_denovo</i>      | 5273594                        | (G/A)       |

| <b>S.N.</b> | <b>SNP IDs</b> | <b>Cultivars</b> | <b>Chromosomes/scaffolds</b> | <b>Physical positions (bp)</b> | <b>SNPs</b> |
|-------------|----------------|------------------|------------------------------|--------------------------------|-------------|
| 18095       | CakSNP18095    | <i>Kabuli</i>    | <i>Ca_Kabuli_denovo</i>      | 5273656                        | (C/G)       |
| 18096       | CakSNP18096    | <i>Kabuli</i>    | <i>Ca_Kabuli_denovo</i>      | 5275340                        | (G/A)       |
| 18097       | CakSNP18097    | <i>Kabuli</i>    | <i>Ca_Kabuli_denovo</i>      | 5280137                        | (G/A)       |
| 18098       | CakSNP18098    | <i>Kabuli</i>    | <i>Ca_Kabuli_denovo</i>      | 5305760                        | (G/C)       |
| 18099       | CakSNP18099    | <i>Kabuli</i>    | <i>Ca_Kabuli_denovo</i>      | 5329084                        | (G/C)       |
| 18100       | CakSNP18100    | <i>Kabuli</i>    | <i>Ca_Kabuli_denovo</i>      | 5329559                        | (T/C)       |
| 18101       | CakSNP18101    | <i>Kabuli</i>    | <i>Ca_Kabuli_denovo</i>      | 5329562                        | (C/G)       |
| 18102       | CakSNP18102    | <i>Kabuli</i>    | <i>Ca_Kabuli_denovo</i>      | 5332558                        | (C/T)       |
| 18103       | CakSNP18103    | <i>Kabuli</i>    | <i>Ca_Kabuli_denovo</i>      | 5332561                        | (C/A)       |
| 18104       | CakSNP18104    | <i>Kabuli</i>    | <i>Ca_Kabuli_denovo</i>      | 5337094                        | (G/C)       |
| 18105       | CakSNP18105    | <i>Kabuli</i>    | <i>Ca_Kabuli_denovo</i>      | 5357564                        | (C/T)       |
| 18106       | CakSNP18106    | <i>Kabuli</i>    | <i>Ca_Kabuli_denovo</i>      | 5358806                        | (A/G)       |
| 18107       | CakSNP18107    | <i>Kabuli</i>    | <i>Ca_Kabuli_denovo</i>      | 5388664                        | (A/T)       |
| 18108       | CakSNP18108    | <i>Kabuli</i>    | <i>Ca_Kabuli_denovo</i>      | 5402790                        | (G/A)       |
| 18109       | CakSNP18109    | <i>Kabuli</i>    | <i>Ca_Kabuli_denovo</i>      | 5402793                        | (C/T)       |
| 18110       | CakSNP18110    | <i>Kabuli</i>    | <i>Ca_Kabuli_denovo</i>      | 5470445                        | (A/C)       |
| 18111       | CakSNP18111    | <i>Kabuli</i>    | <i>Ca_Kabuli_denovo</i>      | 5470446                        | (G/C)       |
| 18112       | CakSNP18112    | <i>Kabuli</i>    | <i>Ca_Kabuli_denovo</i>      | 5470447                        | (A/G)       |
| 18113       | CakSNP18113    | <i>Kabuli</i>    | <i>Ca_Kabuli_denovo</i>      | 5471395                        | (C/T)       |
| 18114       | CakSNP18114    | <i>Kabuli</i>    | <i>Ca_Kabuli_denovo</i>      | 5477856                        | (C/A)       |
| 18115       | CakSNP18115    | <i>Kabuli</i>    | <i>Ca_Kabuli_denovo</i>      | 5529333                        | (C/G)       |
| 18116       | CakSNP18116    | <i>Kabuli</i>    | <i>Ca_Kabuli_denovo</i>      | 5529359                        | (C/T)       |
| 18117       | CakSNP18117    | <i>Kabuli</i>    | <i>Ca_Kabuli_denovo</i>      | 5558990                        | (C/T)       |
| 18118       | CakSNP18118    | <i>Kabuli</i>    | <i>Ca_Kabuli_denovo</i>      | 5559026                        | (C/A)       |
| 18119       | CakSNP18119    | <i>Kabuli</i>    | <i>Ca_Kabuli_denovo</i>      | 5568535                        | (C/G)       |
| 18120       | CakSNP18120    | <i>Kabuli</i>    | <i>Ca_Kabuli_denovo</i>      | 5582991                        | (A/T)       |
| 18121       | CakSNP18121    | <i>Kabuli</i>    | <i>Ca_Kabuli_denovo</i>      | 5592088                        | (C/T)       |
| 18122       | CakSNP18122    | <i>Kabuli</i>    | <i>Ca_Kabuli_denovo</i>      | 5592090                        | (G/T)       |
| 18123       | CakSNP18123    | <i>Kabuli</i>    | <i>Ca_Kabuli_denovo</i>      | 5596926                        | (A/C)       |
| 18124       | CakSNP18124    | <i>Kabuli</i>    | <i>Ca_Kabuli_denovo</i>      | 5681190                        | (A/T)       |
| 18125       | CakSNP18125    | <i>Kabuli</i>    | <i>Ca_Kabuli_denovo</i>      | 5681191                        | (C/T)       |
| 18126       | CakSNP18126    | <i>Kabuli</i>    | <i>Ca_Kabuli_denovo</i>      | 5725564                        | (C/T)       |
| 18127       | CakSNP18127    | <i>Kabuli</i>    | <i>Ca_Kabuli_denovo</i>      | 5725609                        | (G/A)       |
| 18128       | CakSNP18128    | <i>Kabuli</i>    | <i>Ca_Kabuli_denovo</i>      | 5766882                        | (T/G)       |
| 18129       | CakSNP18129    | <i>Kabuli</i>    | <i>Ca_Kabuli_denovo</i>      | 5766883                        | (T/A)       |
| 18130       | CakSNP18130    | <i>Kabuli</i>    | <i>Ca_Kabuli_denovo</i>      | 5773213                        | (C/T)       |
| 18131       | CakSNP18131    | <i>Kabuli</i>    | <i>Ca_Kabuli_denovo</i>      | 5781658                        | (C/G)       |
| 18132       | CakSNP18132    | <i>Kabuli</i>    | <i>Ca_Kabuli_denovo</i>      | 5806886                        | (T/C)       |
| 18133       | CakSNP18133    | <i>Kabuli</i>    | <i>Ca_Kabuli_denovo</i>      | 5816220                        | (A/C)       |

| <b>S.N.</b> | <b>SNP IDs</b> | <b>Cultivars</b> | <b>Chromosomes/scaffolds</b> | <b>Physical positions (bp)</b> | <b>SNPs</b> |
|-------------|----------------|------------------|------------------------------|--------------------------------|-------------|
| 18134       | CakSNP18134    | <i>Kabuli</i>    | <i>Ca_Kabuli_denovo</i>      | 5819283                        | (G/C)       |
| 18135       | CakSNP18135    | <i>Kabuli</i>    | <i>Ca_Kabuli_denovo</i>      | 5848818                        | (T/A)       |
| 18136       | CakSNP18136    | <i>Kabuli</i>    | <i>Ca_Kabuli_denovo</i>      | 5856817                        | (G/A)       |
| 18137       | CakSNP18137    | <i>Kabuli</i>    | <i>Ca_Kabuli_denovo</i>      | 5863013                        | (C/A)       |
| 18138       | CakSNP18138    | <i>Kabuli</i>    | <i>Ca_Kabuli_denovo</i>      | 5863024                        | (G/A)       |
| 18139       | CakSNP18139    | <i>Kabuli</i>    | <i>Ca_Kabuli_denovo</i>      | 5864127                        | (G/A)       |
| 18140       | CakSNP18140    | <i>Kabuli</i>    | <i>Ca_Kabuli_denovo</i>      | 5864153                        | (G/C)       |
| 18141       | CakSNP18141    | <i>Kabuli</i>    | <i>Ca_Kabuli_denovo</i>      | 5873238                        | (C/A)       |
| 18142       | CakSNP18142    | <i>Kabuli</i>    | <i>Ca_Kabuli_denovo</i>      | 5873308                        | (A/G)       |
| 18143       | CakSNP18143    | <i>Kabuli</i>    | <i>Ca_Kabuli_denovo</i>      | 5879375                        | (G/T)       |
| 18144       | CakSNP18144    | <i>Kabuli</i>    | <i>Ca_Kabuli_denovo</i>      | 5879387                        | (C/G)       |
| 18145       | CakSNP18145    | <i>Kabuli</i>    | <i>Ca_Kabuli_denovo</i>      | 5879389                        | (C/A)       |
| 18146       | CakSNP18146    | <i>Kabuli</i>    | <i>Ca_Kabuli_denovo</i>      | 5879418                        | (T/G)       |
| 18147       | CakSNP18147    | <i>Kabuli</i>    | <i>Ca_Kabuli_denovo</i>      | 5879435                        | (C/A)       |
| 18148       | CakSNP18148    | <i>Kabuli</i>    | <i>Ca_Kabuli_denovo</i>      | 5879445                        | (G/T)       |
| 18149       | CakSNP18149    | <i>Kabuli</i>    | <i>Ca_Kabuli_denovo</i>      | 5879451                        | (C/A)       |
| 18150       | CakSNP18150    | <i>Kabuli</i>    | <i>Ca_Kabuli_denovo</i>      | 5890893                        | (T/A)       |
| 18151       | CakSNP18151    | <i>Kabuli</i>    | <i>Ca_Kabuli_denovo</i>      | 5890894                        | (G/A)       |
| 18152       | CakSNP18152    | <i>Kabuli</i>    | <i>Ca_Kabuli_denovo</i>      | 5890895                        | (G/T)       |
| 18153       | CakSNP18153    | <i>Kabuli</i>    | <i>Ca_Kabuli_denovo</i>      | 5890898                        | (C/T)       |
| 18154       | CakSNP18154    | <i>Kabuli</i>    | <i>Ca_Kabuli_denovo</i>      | 5890899                        | (A/T)       |
| 18155       | CakSNP18155    | <i>Kabuli</i>    | <i>Ca_Kabuli_denovo</i>      | 5919819                        | (C/G)       |
| 18156       | CakSNP18156    | <i>Kabuli</i>    | <i>Ca_Kabuli_denovo</i>      | 5952126                        | (A/G)       |
| 18157       | CakSNP18157    | <i>Kabuli</i>    | <i>Ca_Kabuli_denovo</i>      | 5952154                        | (A/C)       |
| 18158       | CakSNP18158    | <i>Kabuli</i>    | <i>Ca_Kabuli_denovo</i>      | 5952171                        | (A/G)       |
| 18159       | CakSNP18159    | <i>Kabuli</i>    | <i>Ca_Kabuli_denovo</i>      | 5963529                        | (G/A)       |
| 18160       | CakSNP18160    | <i>Kabuli</i>    | <i>Ca_Kabuli_denovo</i>      | 5963530                        | (T/A)       |
| 18161       | CakSNP18161    | <i>Kabuli</i>    | <i>Ca_Kabuli_denovo</i>      | 5963531                        | (T/C)       |
| 18162       | CakSNP18162    | <i>Kabuli</i>    | <i>Ca_Kabuli_denovo</i>      | 5963533                        | (G/A)       |
| 18163       | CakSNP18163    | <i>Kabuli</i>    | <i>Ca_Kabuli_denovo</i>      | 5971199                        | (T/G)       |
| 18164       | CakSNP18164    | <i>Kabuli</i>    | <i>Ca_Kabuli_denovo</i>      | 6010227                        | (T/A)       |
| 18165       | CakSNP18165    | <i>Kabuli</i>    | <i>Ca_Kabuli_denovo</i>      | 6010251                        | (T/G)       |
| 18166       | CakSNP18166    | <i>Kabuli</i>    | <i>Ca_Kabuli_denovo</i>      | 6010287                        | (G/T)       |
| 18167       | CakSNP18167    | <i>Kabuli</i>    | <i>Ca_Kabuli_denovo</i>      | 6010311                        | (A/G)       |
| 18168       | CakSNP18168    | <i>Kabuli</i>    | <i>Ca_Kabuli_denovo</i>      | 6010573                        | (G/A)       |
| 18169       | CakSNP18169    | <i>Kabuli</i>    | <i>Ca_Kabuli_denovo</i>      | 6012251                        | (A/C)       |
| 18170       | CakSNP18170    | <i>Kabuli</i>    | <i>Ca_Kabuli_denovo</i>      | 6014521                        | (C/T)       |
| 18171       | CakSNP18171    | <i>Kabuli</i>    | <i>Ca_Kabuli_denovo</i>      | 6014733                        | (T/G)       |
| 18172       | CakSNP18172    | <i>Kabuli</i>    | <i>Ca_Kabuli_denovo</i>      | 6014753                        | (T/G)       |

| <b>S.N.</b> | <b>SNP IDs</b> | <b>Cultivars</b> | <b>Chromosomes/scaffolds</b> | <b>Physical positions (bp)</b> | <b>SNPs</b> |
|-------------|----------------|------------------|------------------------------|--------------------------------|-------------|
| 18173       | CakSNP18173    | <i>Kabuli</i>    | <i>Ca_Kabuli_denovo</i>      | 6014754                        | (T/A)       |
| 18174       | CakSNP18174    | <i>Kabuli</i>    | <i>Ca_Kabuli_denovo</i>      | 6014921                        | (A/C)       |
| 18175       | CakSNP18175    | <i>Kabuli</i>    | <i>Ca_Kabuli_denovo</i>      | 6017294                        | (G/T)       |
| 18176       | CakSNP18176    | <i>Kabuli</i>    | <i>Ca_Kabuli_denovo</i>      | 6017306                        | (T/G)       |
| 18177       | CakSNP18177    | <i>Kabuli</i>    | <i>Ca_Kabuli_denovo</i>      | 6017326                        | (C/G)       |
| 18178       | CakSNP18178    | <i>Kabuli</i>    | <i>Ca_Kabuli_denovo</i>      | 6017328                        | (T/G)       |
| 18179       | CakSNP18179    | <i>Kabuli</i>    | <i>Ca_Kabuli_denovo</i>      | 6017335                        | (A/G)       |
| 18180       | CakSNP18180    | <i>Kabuli</i>    | <i>Ca_Kabuli_denovo</i>      | 6017341                        | (A/G)       |
| 18181       | CakSNP18181    | <i>Kabuli</i>    | <i>Ca_Kabuli_denovo</i>      | 6017344                        | (C/A)       |
| 18182       | CakSNP18182    | <i>Kabuli</i>    | <i>Ca_Kabuli_denovo</i>      | 6017345                        | (C/G)       |
| 18183       | CakSNP18183    | <i>Kabuli</i>    | <i>Ca_Kabuli_denovo</i>      | 6017348                        | (T/G)       |
| 18184       | CakSNP18184    | <i>Kabuli</i>    | <i>Ca_Kabuli_denovo</i>      | 6034062                        | (T/C)       |
| 18185       | CakSNP18185    | <i>Kabuli</i>    | <i>Ca_Kabuli_denovo</i>      | 6034071                        | (A/G)       |
| 18186       | CakSNP18186    | <i>Kabuli</i>    | <i>Ca_Kabuli_denovo</i>      | 6043616                        | (A/G)       |
| 18187       | CakSNP18187    | <i>Kabuli</i>    | <i>Ca_Kabuli_denovo</i>      | 6043627                        | (G/T)       |
| 18188       | CakSNP18188    | <i>Kabuli</i>    | <i>Ca_Kabuli_denovo</i>      | 6047989                        | (T/G)       |
| 18189       | CakSNP18189    | <i>Kabuli</i>    | <i>Ca_Kabuli_denovo</i>      | 6051272                        | (T/C)       |
| 18190       | CakSNP18190    | <i>Kabuli</i>    | <i>Ca_Kabuli_denovo</i>      | 6057777                        | (G/A)       |
| 18191       | CakSNP18191    | <i>Kabuli</i>    | <i>Ca_Kabuli_denovo</i>      | 6059536                        | (A/G)       |
| 18192       | CakSNP18192    | <i>Kabuli</i>    | <i>Ca_Kabuli_denovo</i>      | 6059551                        | (A/G)       |
| 18193       | CakSNP18193    | <i>Kabuli</i>    | <i>Ca_Kabuli_denovo</i>      | 6059588                        | (A/C)       |
| 18194       | CakSNP18194    | <i>Kabuli</i>    | <i>Ca_Kabuli_denovo</i>      | 6098413                        | (G/A)       |
| 18195       | CakSNP18195    | <i>Kabuli</i>    | <i>Ca_Kabuli_denovo</i>      | 6103875                        | (G/A)       |
| 18196       | CakSNP18196    | <i>Kabuli</i>    | <i>Ca_Kabuli_denovo</i>      | 6117175                        | (C/A)       |
| 18197       | CakSNP18197    | <i>Kabuli</i>    | <i>Ca_Kabuli_denovo</i>      | 6117188                        | (C/A)       |
| 18198       | CakSNP18198    | <i>Kabuli</i>    | <i>Ca_Kabuli_denovo</i>      | 6117213                        | (C/G)       |
| 18199       | CakSNP18199    | <i>Kabuli</i>    | <i>Ca_Kabuli_denovo</i>      | 6117215                        | (A/G)       |
| 18200       | CakSNP18200    | <i>Kabuli</i>    | <i>Ca_Kabuli_denovo</i>      | 6165667                        | (T/C)       |
| 18201       | CakSNP18201    | <i>Kabuli</i>    | <i>Ca_Kabuli_denovo</i>      | 6182275                        | (T/G)       |
| 18202       | CakSNP18202    | <i>Kabuli</i>    | <i>Ca_Kabuli_denovo</i>      | 6182281                        | (G/C)       |
| 18203       | CakSNP18203    | <i>Kabuli</i>    | <i>Ca_Kabuli_denovo</i>      | 6190775                        | (T/C)       |
| 18204       | CakSNP18204    | <i>Kabuli</i>    | <i>Ca_Kabuli_denovo</i>      | 6191143                        | (G/C)       |
| 18205       | CakSNP18205    | <i>Kabuli</i>    | <i>Ca_Kabuli_denovo</i>      | 6191170                        | (G/A)       |
| 18206       | CakSNP18206    | <i>Kabuli</i>    | <i>Ca_Kabuli_denovo</i>      | 6237722                        | (G/A)       |
| 18207       | CakSNP18207    | <i>Kabuli</i>    | <i>Ca_Kabuli_denovo</i>      | 6258541                        | (C/G)       |
| 18208       | CakSNP18208    | <i>Kabuli</i>    | <i>Ca_Kabuli_denovo</i>      | 6264608                        | (C/T)       |
| 18209       | CakSNP18209    | <i>Kabuli</i>    | <i>Ca_Kabuli_denovo</i>      | 6300610                        | (A/G)       |
| 18210       | CakSNP18210    | <i>Kabuli</i>    | <i>Ca_Kabuli_denovo</i>      | 6300657                        | (T/C)       |
| 18211       | CakSNP18211    | <i>Kabuli</i>    | <i>Ca_Kabuli_denovo</i>      | 6310736                        | (G/C)       |

| <b>S.N.</b> | <b>SNP IDs</b> | <b>Cultivars</b> | <b>Chromosomes/scaffolds</b> | <b>Physical positions (bp)</b> | <b>SNPs</b> |
|-------------|----------------|------------------|------------------------------|--------------------------------|-------------|
| 18212       | CakSNP18212    | <i>Kabuli</i>    | <i>Ca_Kabuli_denovo</i>      | 6310744                        | (T/C)       |
| 18213       | CakSNP18213    | <i>Kabuli</i>    | <i>Ca_Kabuli_denovo</i>      | 6321154                        | (G/A)       |
| 18214       | CakSNP18214    | <i>Kabuli</i>    | <i>Ca_Kabuli_denovo</i>      | 6355193                        | (T/G)       |
| 18215       | CakSNP18215    | <i>Kabuli</i>    | <i>Ca_Kabuli_denovo</i>      | 6368181                        | (G/A)       |
| 18216       | CakSNP18216    | <i>Kabuli</i>    | <i>Ca_Kabuli_denovo</i>      | 6377203                        | (C/G)       |
| 18217       | CakSNP18217    | <i>Kabuli</i>    | <i>Ca_Kabuli_denovo</i>      | 6399060                        | (G/A)       |
| 18218       | CakSNP18218    | <i>Kabuli</i>    | <i>Ca_Kabuli_denovo</i>      | 6402317                        | (G/C)       |
| 18219       | CakSNP18219    | <i>Kabuli</i>    | <i>Ca_Kabuli_denovo</i>      | 6402384                        | (C/T)       |
| 18220       | CakSNP18220    | <i>Kabuli</i>    | <i>Ca_Kabuli_denovo</i>      | 6402397                        | (A/C)       |
| 18221       | CakSNP18221    | <i>Kabuli</i>    | <i>Ca_Kabuli_denovo</i>      | 6409872                        | (T/A)       |
| 18222       | CakSNP18222    | <i>Kabuli</i>    | <i>Ca_Kabuli_denovo</i>      | 6411767                        | (C/G)       |
| 18223       | CakSNP18223    | <i>Kabuli</i>    | <i>Ca_Kabuli_denovo</i>      | 6411770                        | (C/T)       |
| 18224       | CakSNP18224    | <i>Kabuli</i>    | <i>Ca_Kabuli_denovo</i>      | 6419754                        | (G/A)       |
| 18225       | CakSNP18225    | <i>Kabuli</i>    | <i>Ca_Kabuli_denovo</i>      | 6427894                        | (T/C)       |
| 18226       | CakSNP18226    | <i>Kabuli</i>    | <i>Ca_Kabuli_denovo</i>      | 6462028                        | (C/T)       |
| 18227       | CakSNP18227    | <i>Kabuli</i>    | <i>Ca_Kabuli_denovo</i>      | 6475346                        | (G/A)       |
| 18228       | CakSNP18228    | <i>Kabuli</i>    | <i>Ca_Kabuli_denovo</i>      | 6475348                        | (T/C)       |
| 18229       | CakSNP18229    | <i>Kabuli</i>    | <i>Ca_Kabuli_denovo</i>      | 6480559                        | (A/G)       |
| 18230       | CakSNP18230    | <i>Kabuli</i>    | <i>Ca_Kabuli_denovo</i>      | 6480580                        | (C/G)       |
| 18231       | CakSNP18231    | <i>Kabuli</i>    | <i>Ca_Kabuli_denovo</i>      | 6486758                        | (G/A)       |
| 18232       | CakSNP18232    | <i>Kabuli</i>    | <i>Ca_Kabuli_denovo</i>      | 6486782                        | (C/T)       |
| 18233       | CakSNP18233    | <i>Kabuli</i>    | <i>Ca_Kabuli_denovo</i>      | 6526925                        | (A/C)       |
| 18234       | CakSNP18234    | <i>Kabuli</i>    | <i>Ca_Kabuli_denovo</i>      | 6531409                        | (T/C)       |
| 18235       | CakSNP18235    | <i>Kabuli</i>    | <i>Ca_Kabuli_denovo</i>      | 6545167                        | (G/C)       |
| 18236       | CakSNP18236    | <i>Kabuli</i>    | <i>Ca_Kabuli_denovo</i>      | 6545175                        | (A/G)       |
| 18237       | CakSNP18237    | <i>Kabuli</i>    | <i>Ca_Kabuli_denovo</i>      | 6552139                        | (C/T)       |
| 18238       | CakSNP18238    | <i>Kabuli</i>    | <i>Ca_Kabuli_denovo</i>      | 6552142                        | (G/T)       |
| 18239       | CakSNP18239    | <i>Kabuli</i>    | <i>Ca_Kabuli_denovo</i>      | 6552157                        | (G/T)       |
| 18240       | CakSNP18240    | <i>Kabuli</i>    | <i>Ca_Kabuli_denovo</i>      | 6552161                        | (T/A)       |
| 18241       | CakSNP18241    | <i>Kabuli</i>    | <i>Ca_Kabuli_denovo</i>      | 6559984                        | (C/T)       |
| 18242       | CakSNP18242    | <i>Kabuli</i>    | <i>Ca_Kabuli_denovo</i>      | 6559996                        | (G/A)       |
| 18243       | CakSNP18243    | <i>Kabuli</i>    | <i>Ca_Kabuli_denovo</i>      | 6560006                        | (A/G)       |
| 18244       | CakSNP18244    | <i>Kabuli</i>    | <i>Ca_Kabuli_denovo</i>      | 6565348                        | (T/C)       |
| 18245       | CakSNP18245    | <i>Kabuli</i>    | <i>Ca_Kabuli_denovo</i>      | 6581608                        | (A/C)       |
| 18246       | CakSNP18246    | <i>Kabuli</i>    | <i>Ca_Kabuli_denovo</i>      | 6583973                        | (T/G)       |
| 18247       | CakSNP18247    | <i>Kabuli</i>    | <i>Ca_Kabuli_denovo</i>      | 6590097                        | (C/T)       |
| 18248       | CakSNP18248    | <i>Kabuli</i>    | <i>Ca_Kabuli_denovo</i>      | 6590129                        | (G/A)       |
| 18249       | CakSNP18249    | <i>Kabuli</i>    | <i>Ca_Kabuli_denovo</i>      | 6590156                        | (T/G)       |
| 18250       | CakSNP18250    | <i>Kabuli</i>    | <i>Ca_Kabuli_denovo</i>      | 6599573                        | (A/G)       |

| <b>S.N.</b> | <b>SNP IDs</b> | <b>Cultivars</b> | <b>Chromosomes/scaffolds</b> | <b>Physical positions (bp)</b> | <b>SNPs</b> |
|-------------|----------------|------------------|------------------------------|--------------------------------|-------------|
| 18251       | CakSNP18251    | <i>Kabuli</i>    | <i>Ca_Kabuli_denovo</i>      | 6612721                        | (A/G)       |
| 18252       | CakSNP18252    | <i>Kabuli</i>    | <i>Ca_Kabuli_denovo</i>      | 6663521                        | (C/G)       |
| 18253       | CakSNP18253    | <i>Kabuli</i>    | <i>Ca_Kabuli_denovo</i>      | 6663527                        | (G/A)       |
| 18254       | CakSNP18254    | <i>Kabuli</i>    | <i>Ca_Kabuli_denovo</i>      | 6688010                        | (C/G)       |
| 18255       | CakSNP18255    | <i>Kabuli</i>    | <i>Ca_Kabuli_denovo</i>      | 6706345                        | (A/G)       |
| 18256       | CakSNP18256    | <i>Kabuli</i>    | <i>Ca_Kabuli_denovo</i>      | 6707272                        | (T/C)       |
| 18257       | CakSNP18257    | <i>Kabuli</i>    | <i>Ca_Kabuli_denovo</i>      | 6711061                        | (A/G)       |
| 18258       | CakSNP18258    | <i>Kabuli</i>    | <i>Ca_Kabuli_denovo</i>      | 6712133                        | (C/G)       |
| 18259       | CakSNP18259    | <i>Kabuli</i>    | <i>Ca_Kabuli_denovo</i>      | 6712135                        | (G/C)       |
| 18260       | CakSNP18260    | <i>Kabuli</i>    | <i>Ca_Kabuli_denovo</i>      | 6712138                        | (C/A)       |
| 18261       | CakSNP18261    | <i>Kabuli</i>    | <i>Ca_Kabuli_denovo</i>      | 6712141                        | (A/T)       |
| 18262       | CakSNP18262    | <i>Kabuli</i>    | <i>Ca_Kabuli_denovo</i>      | 6712146                        | (G/T)       |
| 18263       | CakSNP18263    | <i>Kabuli</i>    | <i>Ca_Kabuli_denovo</i>      | 6712147                        | (T/G)       |
| 18264       | CakSNP18264    | <i>Kabuli</i>    | <i>Ca_Kabuli_denovo</i>      | 6720667                        | (A/G)       |
| 18265       | CakSNP18265    | <i>Kabuli</i>    | <i>Ca_Kabuli_denovo</i>      | 6785596                        | (T/A)       |
| 18266       | CakSNP18266    | <i>Kabuli</i>    | <i>Ca_Kabuli_denovo</i>      | 6791052                        | (C/A)       |
| 18267       | CakSNP18267    | <i>Kabuli</i>    | <i>Ca_Kabuli_denovo</i>      | 6791071                        | (A/C)       |
| 18268       | CakSNP18268    | <i>Kabuli</i>    | <i>Ca_Kabuli_denovo</i>      | 6800910                        | (A/T)       |
| 18269       | CakSNP18269    | <i>Kabuli</i>    | <i>Ca_Kabuli_denovo</i>      | 6800913                        | (A/G)       |
| 18270       | CakSNP18270    | <i>Kabuli</i>    | <i>Ca_Kabuli_denovo</i>      | 6800915                        | (G/A)       |
| 18271       | CakSNP18271    | <i>Kabuli</i>    | <i>Ca_Kabuli_denovo</i>      | 6800927                        | (G/C)       |
| 18272       | CakSNP18272    | <i>Kabuli</i>    | <i>Ca_Kabuli_denovo</i>      | 6800944                        | (G/C)       |
| 18273       | CakSNP18273    | <i>Kabuli</i>    | <i>Ca_Kabuli_denovo</i>      | 6800949                        | (T/C)       |
| 18274       | CakSNP18274    | <i>Kabuli</i>    | <i>Ca_Kabuli_denovo</i>      | 6811156                        | (G/T)       |
| 18275       | CakSNP18275    | <i>Kabuli</i>    | <i>Ca_Kabuli_denovo</i>      | 6811456                        | (A/T)       |
| 18276       | CakSNP18276    | <i>Kabuli</i>    | <i>Ca_Kabuli_denovo</i>      | 6811472                        | (A/T)       |
| 18277       | CakSNP18277    | <i>Kabuli</i>    | <i>Ca_Kabuli_denovo</i>      | 6813703                        | (A/G)       |
| 18278       | CakSNP18278    | <i>Kabuli</i>    | <i>Ca_Kabuli_denovo</i>      | 6861843                        | (T/C)       |
| 18279       | CakSNP18279    | <i>Kabuli</i>    | <i>Ca_Kabuli_denovo</i>      | 6861855                        | (G/A)       |
| 18280       | CakSNP18280    | <i>Kabuli</i>    | <i>Ca_Kabuli_denovo</i>      | 6869394                        | (T/C)       |
| 18281       | CakSNP18281    | <i>Kabuli</i>    | <i>Ca_Kabuli_denovo</i>      | 6870117                        | (C/T)       |
| 18282       | CakSNP18282    | <i>Kabuli</i>    | <i>Ca_Kabuli_denovo</i>      | 6870139                        | (G/A)       |
| 18283       | CakSNP18283    | <i>Kabuli</i>    | <i>Ca_Kabuli_denovo</i>      | 6873819                        | (A/T)       |
| 18284       | CakSNP18284    | <i>Kabuli</i>    | <i>Ca_Kabuli_denovo</i>      | 6873823                        | (T/G)       |
| 18285       | CakSNP18285    | <i>Kabuli</i>    | <i>Ca_Kabuli_denovo</i>      | 6873825                        | (T/C)       |
| 18286       | CakSNP18286    | <i>Kabuli</i>    | <i>Ca_Kabuli_denovo</i>      | 6873826                        | (C/T)       |
| 18287       | CakSNP18287    | <i>Kabuli</i>    | <i>Ca_Kabuli_denovo</i>      | 6874179                        | (C/A)       |
| 18288       | CakSNP18288    | <i>Kabuli</i>    | <i>Ca_Kabuli_denovo</i>      | 6874189                        | (G/T)       |
| 18289       | CakSNP18289    | <i>Kabuli</i>    | <i>Ca_Kabuli_denovo</i>      | 6877071                        | (G/A)       |

| <b>S.N.</b> | <b>SNP IDs</b> | <b>Cultivars</b> | <b>Chromosomes/scaffolds</b> | <b>Physical positions (bp)</b> | <b>SNPs</b> |
|-------------|----------------|------------------|------------------------------|--------------------------------|-------------|
| 18290       | CakSNP18290    | <i>Kabuli</i>    | <i>Ca_Kabuli_denovo</i>      | 6882102                        | (C/G)       |
| 18291       | CakSNP18291    | <i>Kabuli</i>    | <i>Ca_Kabuli_denovo</i>      | 6882109                        | (T/C)       |
| 18292       | CakSNP18292    | <i>Kabuli</i>    | <i>Ca_Kabuli_denovo</i>      | 6882113                        | (T/A)       |
| 18293       | CakSNP18293    | <i>Kabuli</i>    | <i>Ca_Kabuli_denovo</i>      | 6882804                        | (T/A)       |
| 18294       | CakSNP18294    | <i>Kabuli</i>    | <i>Ca_Kabuli_denovo</i>      | 6894538                        | (C/G)       |
| 18295       | CakSNP18295    | <i>Kabuli</i>    | <i>Ca_Kabuli_denovo</i>      | 6894541                        | (A/G)       |
| 18296       | CakSNP18296    | <i>Kabuli</i>    | <i>Ca_Kabuli_denovo</i>      | 6894542                        | (C/A)       |
| 18297       | CakSNP18297    | <i>Kabuli</i>    | <i>Ca_Kabuli_denovo</i>      | 6898197                        | (A/G)       |
| 18298       | CakSNP18298    | <i>Kabuli</i>    | <i>Ca_Kabuli_denovo</i>      | 6907485                        | (T/A)       |
| 18299       | CakSNP18299    | <i>Kabuli</i>    | <i>Ca_Kabuli_denovo</i>      | 6907494                        | (A/G)       |
| 18300       | CakSNP18300    | <i>Kabuli</i>    | <i>Ca_Kabuli_denovo</i>      | 6916345                        | (C/G)       |
| 18301       | CakSNP18301    | <i>Kabuli</i>    | <i>Ca_Kabuli_denovo</i>      | 6916346                        | (T/A)       |
| 18302       | CakSNP18302    | <i>Kabuli</i>    | <i>Ca_Kabuli_denovo</i>      | 6916357                        | (C/T)       |
| 18303       | CakSNP18303    | <i>Kabuli</i>    | <i>Ca_Kabuli_denovo</i>      | 6916359                        | (T/C)       |
| 18304       | CakSNP18304    | <i>Kabuli</i>    | <i>Ca_Kabuli_denovo</i>      | 6918579                        | (A/G)       |
| 18305       | CakSNP18305    | <i>Kabuli</i>    | <i>Ca_Kabuli_denovo</i>      | 6918593                        | (C/G)       |
| 18306       | CakSNP18306    | <i>Kabuli</i>    | <i>Ca_Kabuli_denovo</i>      | 6923821                        | (A/T)       |
| 18307       | CakSNP18307    | <i>Kabuli</i>    | <i>Ca_Kabuli_denovo</i>      | 6929548                        | (A/T)       |
| 18308       | CakSNP18308    | <i>Kabuli</i>    | <i>Ca_Kabuli_denovo</i>      | 6939673                        | (G/A)       |
| 18309       | CakSNP18309    | <i>Kabuli</i>    | <i>Ca_Kabuli_denovo</i>      | 6939691                        | (A/T)       |
| 18310       | CakSNP18310    | <i>Kabuli</i>    | <i>Ca_Kabuli_denovo</i>      | 6944977                        | (A/C)       |
| 18311       | CakSNP18311    | <i>Kabuli</i>    | <i>Ca_Kabuli_denovo</i>      | 6945035                        | (C/G)       |
| 18312       | CakSNP18312    | <i>Kabuli</i>    | <i>Ca_Kabuli_denovo</i>      | 6945036                        | (A/G)       |
| 18313       | CakSNP18313    | <i>Kabuli</i>    | <i>Ca_Kabuli_denovo</i>      | 6956695                        | (C/T)       |
| 18314       | CakSNP18314    | <i>Kabuli</i>    | <i>Ca_Kabuli_denovo</i>      | 6956707                        | (A/G)       |
| 18315       | CakSNP18315    | <i>Kabuli</i>    | <i>Ca_Kabuli_denovo</i>      | 6959682                        | (C/G)       |
| 18316       | CakSNP18316    | <i>Kabuli</i>    | <i>Ca_Kabuli_denovo</i>      | 6959727                        | (T/C)       |
| 18317       | CakSNP18317    | <i>Kabuli</i>    | <i>Ca_Kabuli_denovo</i>      | 6960786                        | (G/A)       |
| 18318       | CakSNP18318    | <i>Kabuli</i>    | <i>Ca_Kabuli_denovo</i>      | 6960796                        | (C/A)       |
| 18319       | CakSNP18319    | <i>Kabuli</i>    | <i>Ca_Kabuli_denovo</i>      | 6960820                        | (C/G)       |
| 18320       | CakSNP18320    | <i>Kabuli</i>    | <i>Ca_Kabuli_denovo</i>      | 6975387                        | (A/G)       |
| 18321       | CakSNP18321    | <i>Kabuli</i>    | <i>Ca_Kabuli_denovo</i>      | 6975388                        | (T/A)       |
| 18322       | CakSNP18322    | <i>Kabuli</i>    | <i>Ca_Kabuli_denovo</i>      | 6975430                        | (T/C)       |
| 18323       | CakSNP18323    | <i>Kabuli</i>    | <i>Ca_Kabuli_denovo</i>      | 6975851                        | (T/C)       |
| 18324       | CakSNP18324    | <i>Kabuli</i>    | <i>Ca_Kabuli_denovo</i>      | 6975869                        | (C/G)       |
| 18325       | CakSNP18325    | <i>Kabuli</i>    | <i>Ca_Kabuli_denovo</i>      | 6976418                        | (C/G)       |
| 18326       | CakSNP18326    | <i>Kabuli</i>    | <i>Ca_Kabuli_denovo</i>      | 6976441                        | (T/C)       |
| 18327       | CakSNP18327    | <i>Kabuli</i>    | <i>Ca_Kabuli_denovo</i>      | 6985651                        | (T/C)       |
| 18328       | CakSNP18328    | <i>Kabuli</i>    | <i>Ca_Kabuli_denovo</i>      | 6998248                        | (A/G)       |

| <b>S.N.</b> | <b>SNP IDs</b> | <b>Cultivars</b> | <b>Chromosomes/scaffolds</b> | <b>Physical positions (bp)</b> | <b>SNPs</b> |
|-------------|----------------|------------------|------------------------------|--------------------------------|-------------|
| 18329       | CakSNP18329    | <i>Kabuli</i>    | <i>Ca_Kabuli_denovo</i>      | 6998250                        | (C/A)       |
| 18330       | CakSNP18330    | <i>Kabuli</i>    | <i>Ca_Kabuli_denovo</i>      | 7000764                        | (A/T)       |
| 18331       | CakSNP18331    | <i>Kabuli</i>    | <i>Ca_Kabuli_denovo</i>      | 7012691                        | (A/G)       |
| 18332       | CakSNP18332    | <i>Kabuli</i>    | <i>Ca_Kabuli_denovo</i>      | 7017046                        | (T/C)       |
| 18333       | CakSNP18333    | <i>Kabuli</i>    | <i>Ca_Kabuli_denovo</i>      | 7017051                        | (A/G)       |
| 18334       | CakSNP18334    | <i>Kabuli</i>    | <i>Ca_Kabuli_denovo</i>      | 7017052                        | (T/C)       |
| 18335       | CakSNP18335    | <i>Kabuli</i>    | <i>Ca_Kabuli_denovo</i>      | 7017053                        | (A/C)       |
| 18336       | CakSNP18336    | <i>Kabuli</i>    | <i>Ca_Kabuli_denovo</i>      | 7017058                        | (G/C)       |
| 18337       | CakSNP18337    | <i>Kabuli</i>    | <i>Ca_Kabuli_denovo</i>      | 7017061                        | (A/T)       |
| 18338       | CakSNP18338    | <i>Kabuli</i>    | <i>Ca_Kabuli_denovo</i>      | 7017065                        | (T/C)       |
| 18339       | CakSNP18339    | <i>Kabuli</i>    | <i>Ca_Kabuli_denovo</i>      | 7017071                        | (C/T)       |
| 18340       | CakSNP18340    | <i>Kabuli</i>    | <i>Ca_Kabuli_denovo</i>      | 7017079                        | (C/G)       |
| 18341       | CakSNP18341    | <i>Kabuli</i>    | <i>Ca_Kabuli_denovo</i>      | 7017080                        | (A/G)       |
| 18342       | CakSNP18342    | <i>Kabuli</i>    | <i>Ca_Kabuli_denovo</i>      | 7017081                        | (G/T)       |
| 18343       | CakSNP18343    | <i>Kabuli</i>    | <i>Ca_Kabuli_denovo</i>      | 7069247                        | (G/A)       |
| 18344       | CakSNP18344    | <i>Kabuli</i>    | <i>Ca_Kabuli_denovo</i>      | 7069273                        | (C/T)       |
| 18345       | CakSNP18345    | <i>Kabuli</i>    | <i>Ca_Kabuli_denovo</i>      | 7069930                        | (G/C)       |
| 18346       | CakSNP18346    | <i>Kabuli</i>    | <i>Ca_Kabuli_denovo</i>      | 7070108                        | (A/G)       |
| 18347       | CakSNP18347    | <i>Kabuli</i>    | <i>Ca_Kabuli_denovo</i>      | 7070110                        | (G/A)       |
| 18348       | CakSNP18348    | <i>Kabuli</i>    | <i>Ca_Kabuli_denovo</i>      | 7070111                        | (A/G)       |
| 18349       | CakSNP18349    | <i>Kabuli</i>    | <i>Ca_Kabuli_denovo</i>      | 7070113                        | (C/G)       |
| 18350       | CakSNP18350    | <i>Kabuli</i>    | <i>Ca_Kabuli_denovo</i>      | 7070115                        | (T/G)       |
| 18351       | CakSNP18351    | <i>Kabuli</i>    | <i>Ca_Kabuli_denovo</i>      | 7070117                        | (C/T)       |
| 18352       | CakSNP18352    | <i>Kabuli</i>    | <i>Ca_Kabuli_denovo</i>      | 7086244                        | (A/G)       |
| 18353       | CakSNP18353    | <i>Kabuli</i>    | <i>Ca_Kabuli_denovo</i>      | 7103380                        | (A/C)       |
| 18354       | CakSNP18354    | <i>Kabuli</i>    | <i>Ca_Kabuli_denovo</i>      | 7127589                        | (G/A)       |
| 18355       | CakSNP18355    | <i>Kabuli</i>    | <i>Ca_Kabuli_denovo</i>      | 7131343                        | (G/A)       |
| 18356       | CakSNP18356    | <i>Kabuli</i>    | <i>Ca_Kabuli_denovo</i>      | 7141293                        | (A/G)       |
| 18357       | CakSNP18357    | <i>Kabuli</i>    | <i>Ca_Kabuli_denovo</i>      | 7141324                        | (A/G)       |
| 18358       | CakSNP18358    | <i>Kabuli</i>    | <i>Ca_Kabuli_denovo</i>      | 7143296                        | (G/A)       |
| 18359       | CakSNP18359    | <i>Kabuli</i>    | <i>Ca_Kabuli_denovo</i>      | 7143640                        | (G/A)       |
| 18360       | CakSNP18360    | <i>Kabuli</i>    | <i>Ca_Kabuli_denovo</i>      | 7143649                        | (G/A)       |
| 18361       | CakSNP18361    | <i>Kabuli</i>    | <i>Ca_Kabuli_denovo</i>      | 7143693                        | (T/C)       |
| 18362       | CakSNP18362    | <i>Kabuli</i>    | <i>Ca_Kabuli_denovo</i>      | 7146142                        | (C/T)       |
| 18363       | CakSNP18363    | <i>Kabuli</i>    | <i>Ca_Kabuli_denovo</i>      | 7146173                        | (C/T)       |
| 18364       | CakSNP18364    | <i>Kabuli</i>    | <i>Ca_Kabuli_denovo</i>      | 7149196                        | (C/T)       |
| 18365       | CakSNP18365    | <i>Kabuli</i>    | <i>Ca_Kabuli_denovo</i>      | 7152489                        | (C/T)       |
| 18366       | CakSNP18366    | <i>Kabuli</i>    | <i>Ca_Kabuli_denovo</i>      | 7183627                        | (A/G)       |
| 18367       | CakSNP18367    | <i>Kabuli</i>    | <i>Ca_Kabuli_denovo</i>      | 7191526                        | (C/T)       |



| <b>S.N.</b> | <b>SNP IDs</b> | <b>Cultivars</b> | <b>Chromosomes/scaffolds</b> | <b>Physical positions (bp)</b> | <b>SNPs</b> |
|-------------|----------------|------------------|------------------------------|--------------------------------|-------------|
| 18368       | CakSNP18368    | <i>Kabuli</i>    | <i>Ca_Kabuli_denovo</i>      | 7246580                        | (C/T)       |
| 18369       | CakSNP18369    | <i>Kabuli</i>    | <i>Ca_Kabuli_denovo</i>      | 7254020                        | (C/G)       |
| 18370       | CakSNP18370    | <i>Kabuli</i>    | <i>Ca_Kabuli_denovo</i>      | 7254039                        | (T/C)       |
| 18371       | CakSNP18371    | <i>Kabuli</i>    | <i>Ca_Kabuli_denovo</i>      | 7257747                        | (G/C)       |
| 18372       | CakSNP18372    | <i>Kabuli</i>    | <i>Ca_Kabuli_denovo</i>      | 7267238                        | (C/T)       |
| 18373       | CakSNP18373    | <i>Kabuli</i>    | <i>Ca_Kabuli_denovo</i>      | 7267256                        | (C/A)       |
| 18374       | CakSNP18374    | <i>Kabuli</i>    | <i>Ca_Kabuli_denovo</i>      | 7267260                        | (A/T)       |
| 18375       | CakSNP18375    | <i>Kabuli</i>    | <i>Ca_Kabuli_denovo</i>      | 7311958                        | (G/A)       |
| 18376       | CakSNP18376    | <i>Kabuli</i>    | <i>Ca_Kabuli_denovo</i>      | 7328061                        | (A/G)       |
| 18377       | CakSNP18377    | <i>Kabuli</i>    | <i>Ca_Kabuli_denovo</i>      | 7344433                        | (T/A)       |
| 18378       | CakSNP18378    | <i>Kabuli</i>    | <i>Ca_Kabuli_denovo</i>      | 7369005                        | (G/A)       |
| 18379       | CakSNP18379    | <i>Kabuli</i>    | <i>Ca_Kabuli_denovo</i>      | 7375018                        | (T/C)       |
| 18380       | CakSNP18380    | <i>Kabuli</i>    | <i>Ca_Kabuli_denovo</i>      | 7382267                        | (T/C)       |
| 18381       | CakSNP18381    | <i>Kabuli</i>    | <i>Ca_Kabuli_denovo</i>      | 7382310                        | (G/T)       |
| 18382       | CakSNP18382    | <i>Kabuli</i>    | <i>Ca_Kabuli_denovo</i>      | 7391587                        | (C/G)       |
| 18383       | CakSNP18383    | <i>Kabuli</i>    | <i>Ca_Kabuli_denovo</i>      | 7391613                        | (T/G)       |
| 18384       | CakSNP18384    | <i>Kabuli</i>    | <i>Ca_Kabuli_denovo</i>      | 7391949                        | (C/T)       |
| 18385       | CakSNP18385    | <i>Kabuli</i>    | <i>Ca_Kabuli_denovo</i>      | 7401051                        | (C/G)       |
| 18386       | CakSNP18386    | <i>Kabuli</i>    | <i>Ca_Kabuli_denovo</i>      | 7401054                        | (G/T)       |
| 18387       | CakSNP18387    | <i>Kabuli</i>    | <i>Ca_Kabuli_denovo</i>      | 7401077                        | (A/G)       |
| 18388       | CakSNP18388    | <i>Kabuli</i>    | <i>Ca_Kabuli_denovo</i>      | 7401092                        | (G/A)       |
| 18389       | CakSNP18389    | <i>Kabuli</i>    | <i>Ca_Kabuli_denovo</i>      | 7401100                        | (A/G)       |
| 18390       | CakSNP18390    | <i>Kabuli</i>    | <i>Ca_Kabuli_denovo</i>      | 7401103                        | (C/T)       |
| 18391       | CakSNP18391    | <i>Kabuli</i>    | <i>Ca_Kabuli_denovo</i>      | 7401244                        | (T/A)       |
| 18392       | CakSNP18392    | <i>Kabuli</i>    | <i>Ca_Kabuli_denovo</i>      | 7416312                        | (C/T)       |
| 18393       | CakSNP18393    | <i>Kabuli</i>    | <i>Ca_Kabuli_denovo</i>      | 7416345                        | (A/G)       |
| 18394       | CakSNP18394    | <i>Kabuli</i>    | <i>Ca_Kabuli_denovo</i>      | 7427788                        | (G/A)       |
| 18395       | CakSNP18395    | <i>Kabuli</i>    | <i>Ca_Kabuli_denovo</i>      | 7430435                        | (C/T)       |
| 18396       | CakSNP18396    | <i>Kabuli</i>    | <i>Ca_Kabuli_denovo</i>      | 7430455                        | (A/T)       |
| 18397       | CakSNP18397    | <i>Kabuli</i>    | <i>Ca_Kabuli_denovo</i>      | 7430464                        | (A/G)       |
| 18398       | CakSNP18398    | <i>Kabuli</i>    | <i>Ca_Kabuli_denovo</i>      | 7452895                        | (C/G)       |
| 18399       | CakSNP18399    | <i>Kabuli</i>    | <i>Ca_Kabuli_denovo</i>      | 7467529                        | (G/T)       |
| 18400       | CakSNP18400    | <i>Kabuli</i>    | <i>Ca_Kabuli_denovo</i>      | 7470943                        | (T/G)       |
| 18401       | CakSNP18401    | <i>Kabuli</i>    | <i>Ca_Kabuli_denovo</i>      | 7473234                        | (A/G)       |
| 18402       | CakSNP18402    | <i>Kabuli</i>    | <i>Ca_Kabuli_denovo</i>      | 7477213                        | (G/A)       |
| 18403       | CakSNP18403    | <i>Kabuli</i>    | <i>Ca_Kabuli_denovo</i>      | 7477273                        | (A/G)       |
| 18404       | CakSNP18404    | <i>Kabuli</i>    | <i>Ca_Kabuli_denovo</i>      | 7477350                        | (C/T)       |
| 18405       | CakSNP18405    | <i>Kabuli</i>    | <i>Ca_Kabuli_denovo</i>      | 7480213                        | (C/G)       |
| 18406       | CakSNP18406    | <i>Kabuli</i>    | <i>Ca_Kabuli_denovo</i>      | 7480219                        | (C/T)       |

| <b>S.N.</b> | <b>SNP IDs</b> | <b>Cultivars</b> | <b>Chromosomes/scaffolds</b> | <b>Physical positions (bp)</b> | <b>SNPs</b> |
|-------------|----------------|------------------|------------------------------|--------------------------------|-------------|
| 18407       | CakSNP18407    | <i>Kabuli</i>    | <i>Ca_Kabuli_denovo</i>      | 7482161                        | (T/G)       |
| 18408       | CakSNP18408    | <i>Kabuli</i>    | <i>Ca_Kabuli_denovo</i>      | 7494282                        | (T/A)       |
| 18409       | CakSNP18409    | <i>Kabuli</i>    | <i>Ca_Kabuli_denovo</i>      | 7496672                        | (C/G)       |
| 18410       | CakSNP18410    | <i>Kabuli</i>    | <i>Ca_Kabuli_denovo</i>      | 7496846                        | (A/G)       |
| 18411       | CakSNP18411    | <i>Kabuli</i>    | <i>Ca_Kabuli_denovo</i>      | 7496849                        | (C/G)       |
| 18412       | CakSNP18412    | <i>Kabuli</i>    | <i>Ca_Kabuli_denovo</i>      | 7500180                        | (G/A)       |
| 18413       | CakSNP18413    | <i>Kabuli</i>    | <i>Ca_Kabuli_denovo</i>      | 7503626                        | (G/A)       |
| 18414       | CakSNP18414    | <i>Kabuli</i>    | <i>Ca_Kabuli_denovo</i>      | 7504369                        | (C/G)       |
| 18415       | CakSNP18415    | <i>Kabuli</i>    | <i>Ca_Kabuli_denovo</i>      | 7508116                        | (T/C)       |
| 18416       | CakSNP18416    | <i>Kabuli</i>    | <i>Ca_Kabuli_denovo</i>      | 7511720                        | (C/G)       |
| 18417       | CakSNP18417    | <i>Kabuli</i>    | <i>Ca_Kabuli_denovo</i>      | 7511741                        | (G/A)       |
| 18418       | CakSNP18418    | <i>Kabuli</i>    | <i>Ca_Kabuli_denovo</i>      | 7511744                        | (G/C)       |
| 18419       | CakSNP18419    | <i>Kabuli</i>    | <i>Ca_Kabuli_denovo</i>      | 7516002                        | (A/G)       |
| 18420       | CakSNP18420    | <i>Kabuli</i>    | <i>Ca_Kabuli_denovo</i>      | 7516053                        | (G/A)       |
| 18421       | CakSNP18421    | <i>Kabuli</i>    | <i>Ca_Kabuli_denovo</i>      | 7516067                        | (T/C)       |
| 18422       | CakSNP18422    | <i>Kabuli</i>    | <i>Ca_Kabuli_denovo</i>      | 7518038                        | (A/G)       |
| 18423       | CakSNP18423    | <i>Kabuli</i>    | <i>Ca_Kabuli_denovo</i>      | 7518231                        | (C/T)       |
| 18424       | CakSNP18424    | <i>Kabuli</i>    | <i>Ca_Kabuli_denovo</i>      | 7519248                        | (G/A)       |
| 18425       | CakSNP18425    | <i>Kabuli</i>    | <i>Ca_Kabuli_denovo</i>      | 7520456                        | (A/G)       |
| 18426       | CakSNP18426    | <i>Kabuli</i>    | <i>Ca_Kabuli_denovo</i>      | 7520467                        | (T/C)       |
| 18427       | CakSNP18427    | <i>Kabuli</i>    | <i>Ca_Kabuli_denovo</i>      | 7522835                        | (G/A)       |
| 18428       | CakSNP18428    | <i>Kabuli</i>    | <i>Ca_Kabuli_denovo</i>      | 7532746                        | (T/C)       |
| 18429       | CakSNP18429    | <i>Kabuli</i>    | <i>Ca_Kabuli_denovo</i>      | 7534604                        | (C/T)       |
| 18430       | CakSNP18430    | <i>Kabuli</i>    | <i>Ca_Kabuli_denovo</i>      | 7537117                        | (G/A)       |
| 18431       | CakSNP18431    | <i>Kabuli</i>    | <i>Ca_Kabuli_denovo</i>      | 7537138                        | (C/T)       |
| 18432       | CakSNP18432    | <i>Kabuli</i>    | <i>Ca_Kabuli_denovo</i>      | 7539822                        | (C/T)       |
| 18433       | CakSNP18433    | <i>Kabuli</i>    | <i>Ca_Kabuli_denovo</i>      | 7539825                        | (C/G)       |
| 18434       | CakSNP18434    | <i>Kabuli</i>    | <i>Ca_Kabuli_denovo</i>      | 7546313                        | (A/G)       |
| 18435       | CakSNP18435    | <i>Kabuli</i>    | <i>Ca_Kabuli_denovo</i>      | 7548311                        | (A/G)       |
| 18436       | CakSNP18436    | <i>Kabuli</i>    | <i>Ca_Kabuli_denovo</i>      | 7549471                        | (T/C)       |
| 18437       | CakSNP18437    | <i>Kabuli</i>    | <i>Ca_Kabuli_denovo</i>      | 7549507                        | (T/G)       |
| 18438       | CakSNP18438    | <i>Kabuli</i>    | <i>Ca_Kabuli_denovo</i>      | 7553420                        | (A/G)       |
| 18439       | CakSNP18439    | <i>Kabuli</i>    | <i>Ca_Kabuli_denovo</i>      | 7557108                        | (C/G)       |
| 18440       | CakSNP18440    | <i>Kabuli</i>    | <i>Ca_Kabuli_denovo</i>      | 7557111                        | (G/C)       |
| 18441       | CakSNP18441    | <i>Kabuli</i>    | <i>Ca_Kabuli_denovo</i>      | 7563251                        | (A/G)       |
| 18442       | CakSNP18442    | <i>Kabuli</i>    | <i>Ca_Kabuli_denovo</i>      | 7563332                        | (C/G)       |
| 18443       | CakSNP18443    | <i>Kabuli</i>    | <i>Ca_Kabuli_denovo</i>      | 7569104                        | (T/A)       |
| 18444       | CakSNP18444    | <i>Kabuli</i>    | <i>Ca_Kabuli_denovo</i>      | 7569136                        | (A/C)       |
| 18445       | CakSNP18445    | <i>Kabuli</i>    | <i>Ca_Kabuli_denovo</i>      | 7571356                        | (C/G)       |

| <b>S.N.</b> | <b>SNP IDs</b> | <b>Cultivars</b> | <b>Chromosomes/scaffolds</b> | <b>Physical positions (bp)</b> | <b>SNPs</b> |
|-------------|----------------|------------------|------------------------------|--------------------------------|-------------|
| 18446       | CakSNP18446    | <i>Kabuli</i>    | <i>Ca_Kabuli_denovo</i>      | 7581291                        | (T/C)       |
| 18447       | CakSNP18447    | <i>Kabuli</i>    | <i>Ca_Kabuli_denovo</i>      | 7583443                        | (T/G)       |
| 18448       | CakSNP18448    | <i>Kabuli</i>    | <i>Ca_Kabuli_denovo</i>      | 7586717                        | (T/C)       |
| 18449       | CakSNP18449    | <i>Kabuli</i>    | <i>Ca_Kabuli_denovo</i>      | 7587722                        | (T/G)       |
| 18450       | CakSNP18450    | <i>Kabuli</i>    | <i>Ca_Kabuli_denovo</i>      | 7590523                        | (A/G)       |
| 18451       | CakSNP18451    | <i>Kabuli</i>    | <i>Ca_Kabuli_denovo</i>      | 7597523                        | (G/A)       |
| 18452       | CakSNP18452    | <i>Kabuli</i>    | <i>Ca_Kabuli_denovo</i>      | 7597543                        | (G/T)       |
| 18453       | CakSNP18453    | <i>Kabuli</i>    | <i>Ca_Kabuli_denovo</i>      | 7599351                        | (A/G)       |
| 18454       | CakSNP18454    | <i>Kabuli</i>    | <i>Ca_Kabuli_denovo</i>      | 7599355                        | (G/A)       |
| 18455       | CakSNP18455    | <i>Kabuli</i>    | <i>Ca_Kabuli_denovo</i>      | 7607382                        | (C/T)       |
| 18456       | CakSNP18456    | <i>Kabuli</i>    | <i>Ca_Kabuli_denovo</i>      | 7619139                        | (G/A)       |
| 18457       | CakSNP18457    | <i>Kabuli</i>    | <i>Ca_Kabuli_denovo</i>      | 7619163                        | (G/A)       |
| 18458       | CakSNP18458    | <i>Kabuli</i>    | <i>Ca_Kabuli_denovo</i>      | 7621274                        | (A/G)       |
| 18459       | CakSNP18459    | <i>Kabuli</i>    | <i>Ca_Kabuli_denovo</i>      | 7621346                        | (T/C)       |
| 18460       | CakSNP18460    | <i>Kabuli</i>    | <i>Ca_Kabuli_denovo</i>      | 7632661                        | (A/G)       |
| 18461       | CakSNP18461    | <i>Kabuli</i>    | <i>Ca_Kabuli_denovo</i>      | 7632682                        | (C/T)       |
| 18462       | CakSNP18462    | <i>Kabuli</i>    | <i>Ca_Kabuli_denovo</i>      | 7634464                        | (G/A)       |
| 18463       | CakSNP18463    | <i>Kabuli</i>    | <i>Ca_Kabuli_denovo</i>      | 7638848                        | (C/G)       |
| 18464       | CakSNP18464    | <i>Kabuli</i>    | <i>Ca_Kabuli_denovo</i>      | 7638917                        | (A/C)       |
| 18465       | CakSNP18465    | <i>Kabuli</i>    | <i>Ca_Kabuli_denovo</i>      | 7642288                        | (A/G)       |
| 18466       | CakSNP18466    | <i>Kabuli</i>    | <i>Ca_Kabuli_denovo</i>      | 7644157                        | (G/A)       |
| 18467       | CakSNP18467    | <i>Kabuli</i>    | <i>Ca_Kabuli_denovo</i>      | 7644247                        | (C/G)       |
| 18468       | CakSNP18468    | <i>Kabuli</i>    | <i>Ca_Kabuli_denovo</i>      | 7644265                        | (C/T)       |
| 18469       | CakSNP18469    | <i>Kabuli</i>    | <i>Ca_Kabuli_denovo</i>      | 7644275                        | (G/A)       |
| 18470       | CakSNP18470    | <i>Kabuli</i>    | <i>Ca_Kabuli_denovo</i>      | 7644306                        | (G/A)       |
| 18471       | CakSNP18471    | <i>Kabuli</i>    | <i>Ca_Kabuli_denovo</i>      | 7647077                        | (G/A)       |
| 18472       | CakSNP18472    | <i>Kabuli</i>    | <i>Ca_Kabuli_denovo</i>      | 7659948                        | (T/A)       |
| 18473       | CakSNP18473    | <i>Kabuli</i>    | <i>Ca_Kabuli_denovo</i>      | 7660004                        | (A/G)       |
| 18474       | CakSNP18474    | <i>Kabuli</i>    | <i>Ca_Kabuli_denovo</i>      | 7661617                        | (G/T)       |
| 18475       | CakSNP18475    | <i>Kabuli</i>    | <i>Ca_Kabuli_denovo</i>      | 7662572                        | (C/G)       |
| 18476       | CakSNP18476    | <i>Kabuli</i>    | <i>Ca_Kabuli_denovo</i>      | 7662608                        | (A/G)       |
| 18477       | CakSNP18477    | <i>Kabuli</i>    | <i>Ca_Kabuli_denovo</i>      | 7663940                        | (A/C)       |
| 18478       | CakSNP18478    | <i>Kabuli</i>    | <i>Ca_Kabuli_denovo</i>      | 7663942                        | (A/G)       |
| 18479       | CakSNP18479    | <i>Kabuli</i>    | <i>Ca_Kabuli_denovo</i>      | 7665276                        | (G/A)       |
| 18480       | CakSNP18480    | <i>Kabuli</i>    | <i>Ca_Kabuli_denovo</i>      | 7668261                        | (C/T)       |
| 18481       | CakSNP18481    | <i>Kabuli</i>    | <i>Ca_Kabuli_denovo</i>      | 7668301                        | (T/C)       |
| 18482       | CakSNP18482    | <i>Kabuli</i>    | <i>Ca_Kabuli_denovo</i>      | 7671493                        | (C/T)       |
| 18483       | CakSNP18483    | <i>Kabuli</i>    | <i>Ca_Kabuli_denovo</i>      | 7671508                        | (T/C)       |
| 18484       | CakSNP18484    | <i>Kabuli</i>    | <i>Ca_Kabuli_denovo</i>      | 7674683                        | (A/C)       |

| <b>S.N.</b> | <b>SNP IDs</b> | <b>Cultivars</b> | <b>Chromosomes/scaffolds</b> | <b>Physical positions (bp)</b> | <b>SNPs</b> |
|-------------|----------------|------------------|------------------------------|--------------------------------|-------------|
| 18485       | CakSNP18485    | <i>Kabuli</i>    | <i>Ca_Kabuli_denovo</i>      | 7679874                        | (G/C)       |
| 18486       | CakSNP18486    | <i>Kabuli</i>    | <i>Ca_Kabuli_denovo</i>      | 7681981                        | (G/T)       |
| 18487       | CakSNP18487    | <i>Kabuli</i>    | <i>Ca_Kabuli_denovo</i>      | 7686913                        | (A/C)       |
| 18488       | CakSNP18488    | <i>Kabuli</i>    | <i>Ca_Kabuli_denovo</i>      | 7686915                        | (G/A)       |
| 18489       | CakSNP18489    | <i>Kabuli</i>    | <i>Ca_Kabuli_denovo</i>      | 7689434                        | (G/A)       |
| 18490       | CakSNP18490    | <i>Kabuli</i>    | <i>Ca_Kabuli_denovo</i>      | 7689491                        | (G/A)       |
| 18491       | CakSNP18491    | <i>Kabuli</i>    | <i>Ca_Kabuli_denovo</i>      | 7694767                        | (C/T)       |
| 18492       | CakSNP18492    | <i>Kabuli</i>    | <i>Ca_Kabuli_denovo</i>      | 7694773                        | (T/C)       |
| 18493       | CakSNP18493    | <i>Kabuli</i>    | <i>Ca_Kabuli_denovo</i>      | 7696282                        | (C/T)       |
| 18494       | CakSNP18494    | <i>Kabuli</i>    | <i>Ca_Kabuli_denovo</i>      | 7698789                        | (G/C)       |
| 18495       | CakSNP18495    | <i>Kabuli</i>    | <i>Ca_Kabuli_denovo</i>      | 7707323                        | (G/A)       |
| 18496       | CakSNP18496    | <i>Kabuli</i>    | <i>Ca_Kabuli_denovo</i>      | 7713250                        | (C/T)       |
| 18497       | CakSNP18497    | <i>Kabuli</i>    | <i>Ca_Kabuli_denovo</i>      | 7713283                        | (C/A)       |
| 18498       | CakSNP18498    | <i>Kabuli</i>    | <i>Ca_Kabuli_denovo</i>      | 7714197                        | (A/G)       |
| 18499       | CakSNP18499    | <i>Kabuli</i>    | <i>Ca_Kabuli_denovo</i>      | 7719731                        | (G/A)       |
| 18500       | CakSNP18500    | <i>Kabuli</i>    | <i>Ca_Kabuli_denovo</i>      | 7722023                        | (T/G)       |
| 18501       | CakSNP18501    | <i>Kabuli</i>    | <i>Ca_Kabuli_denovo</i>      | 7722035                        | (G/T)       |
| 18502       | CakSNP18502    | <i>Kabuli</i>    | <i>Ca_Kabuli_denovo</i>      | 7736605                        | (G/A)       |
| 18503       | CakSNP18503    | <i>Kabuli</i>    | <i>Ca_Kabuli_denovo</i>      | 7740036                        | (T/A)       |
| 18504       | CakSNP18504    | <i>Kabuli</i>    | <i>Ca_Kabuli_denovo</i>      | 7742921                        | (A/G)       |
| 18505       | CakSNP18505    | <i>Kabuli</i>    | <i>Ca_Kabuli_denovo</i>      | 7742924                        | (T/G)       |
| 18506       | CakSNP18506    | <i>Kabuli</i>    | <i>Ca_Kabuli_denovo</i>      | 7744414                        | (C/T)       |
| 18507       | CakSNP18507    | <i>Kabuli</i>    | <i>Ca_Kabuli_denovo</i>      | 7749013                        | (C/T)       |
| 18508       | CakSNP18508    | <i>Kabuli</i>    | <i>Ca_Kabuli_denovo</i>      | 7755838                        | (A/G)       |
| 18509       | CakSNP18509    | <i>Kabuli</i>    | <i>Ca_Kabuli_denovo</i>      | 7757665                        | (G/T)       |
| 18510       | CakSNP18510    | <i>Kabuli</i>    | <i>Ca_Kabuli_denovo</i>      | 7763638                        | (A/C)       |
| 18511       | CakSNP18511    | <i>Kabuli</i>    | <i>Ca_Kabuli_denovo</i>      | 7763641                        | (T/A)       |
| 18512       | CakSNP18512    | <i>Kabuli</i>    | <i>Ca_Kabuli_denovo</i>      | 7773005                        | (C/G)       |
| 18513       | CakSNP18513    | <i>Kabuli</i>    | <i>Ca_Kabuli_denovo</i>      | 7773497                        | (C/T)       |
| 18514       | CakSNP18514    | <i>Kabuli</i>    | <i>Ca_Kabuli_denovo</i>      | 7775131                        | (C/A)       |
| 18515       | CakSNP18515    | <i>Kabuli</i>    | <i>Ca_Kabuli_denovo</i>      | 7777349                        | (G/A)       |
| 18516       | CakSNP18516    | <i>Kabuli</i>    | <i>Ca_Kabuli_denovo</i>      | 7777355                        | (C/G)       |
| 18517       | CakSNP18517    | <i>Kabuli</i>    | <i>Ca_Kabuli_denovo</i>      | 7780110                        | (T/C)       |
| 18518       | CakSNP18518    | <i>Kabuli</i>    | <i>Ca_Kabuli_denovo</i>      | 7780147                        | (T/C)       |
| 18519       | CakSNP18519    | <i>Kabuli</i>    | <i>Ca_Kabuli_denovo</i>      | 7780424                        | (T/G)       |
| 18520       | CakSNP18520    | <i>Kabuli</i>    | <i>Ca_Kabuli_denovo</i>      | 7783550                        | (T/C)       |
| 18521       | CakSNP18521    | <i>Kabuli</i>    | <i>Ca_Kabuli_denovo</i>      | 7784298                        | (A/G)       |
| 18522       | CakSNP18522    | <i>Kabuli</i>    | <i>Ca_Kabuli_denovo</i>      | 7784355                        | (G/A)       |
| 18523       | CakSNP18523    | <i>Kabuli</i>    | <i>Ca_Kabuli_denovo</i>      | 7786066                        | (A/G)       |

| <b>S.N.</b> | <b>SNP IDs</b> | <b>Cultivars</b> | <b>Chromosomes/scaffolds</b> | <b>Physical positions (bp)</b> | <b>SNPs</b> |
|-------------|----------------|------------------|------------------------------|--------------------------------|-------------|
| 18524       | CakSNP18524    | <i>Kabuli</i>    | <i>Ca_Kabuli_denovo</i>      | 7786092                        | (T/C)       |
| 18525       | CakSNP18525    | <i>Kabuli</i>    | <i>Ca_Kabuli_denovo</i>      | 7788204                        | (T/C)       |
| 18526       | CakSNP18526    | <i>Kabuli</i>    | <i>Ca_Kabuli_denovo</i>      | 7789221                        | (T/C)       |
| 18527       | CakSNP18527    | <i>Kabuli</i>    | <i>Ca_Kabuli_denovo</i>      | 7789301                        | (C/T)       |
| 18528       | CakSNP18528    | <i>Kabuli</i>    | <i>Ca_Kabuli_denovo</i>      | 7793891                        | (G/C)       |
| 18529       | CakSNP18529    | <i>Kabuli</i>    | <i>Ca_Kabuli_denovo</i>      | 7793893                        | (C/A)       |
| 18530       | CakSNP18530    | <i>Kabuli</i>    | <i>Ca_Kabuli_denovo</i>      | 7797598                        | (A/G)       |
| 18531       | CakSNP18531    | <i>Kabuli</i>    | <i>Ca_Kabuli_denovo</i>      | 7801499                        | (T/C)       |
| 18532       | CakSNP18532    | <i>Kabuli</i>    | <i>Ca_Kabuli_denovo</i>      | 7803930                        | (G/A)       |
| 18533       | CakSNP18533    | <i>Kabuli</i>    | <i>Ca_Kabuli_denovo</i>      | 7803960                        | (T/C)       |
| 18534       | CakSNP18534    | <i>Kabuli</i>    | <i>Ca_Kabuli_denovo</i>      | 7808478                        | (T/C)       |
| 18535       | CakSNP18535    | <i>Kabuli</i>    | <i>Ca_Kabuli_denovo</i>      | 7811193                        | (T/C)       |
| 18536       | CakSNP18536    | <i>Kabuli</i>    | <i>Ca_Kabuli_denovo</i>      | 7811229                        | (T/C)       |
| 18537       | CakSNP18537    | <i>Kabuli</i>    | <i>Ca_Kabuli_denovo</i>      | 7815667                        | (G/T)       |
| 18538       | CakSNP18538    | <i>Kabuli</i>    | <i>Ca_Kabuli_denovo</i>      | 7817621                        | (G/C)       |
| 18539       | CakSNP18539    | <i>Kabuli</i>    | <i>Ca_Kabuli_denovo</i>      | 7817663                        | (T/C)       |
| 18540       | CakSNP18540    | <i>Kabuli</i>    | <i>Ca_Kabuli_denovo</i>      | 7819661                        | (A/G)       |
| 18541       | CakSNP18541    | <i>Kabuli</i>    | <i>Ca_Kabuli_denovo</i>      | 7819688                        | (C/T)       |
| 18542       | CakSNP18542    | <i>Kabuli</i>    | <i>Ca_Kabuli_denovo</i>      | 7821392                        | (A/T)       |
| 18543       | CakSNP18543    | <i>Kabuli</i>    | <i>Ca_Kabuli_denovo</i>      | 7822168                        | (T/C)       |
| 18544       | CakSNP18544    | <i>Kabuli</i>    | <i>Ca_Kabuli_denovo</i>      | 7823280                        | (G/A)       |
| 18545       | CakSNP18545    | <i>Kabuli</i>    | <i>Ca_Kabuli_denovo</i>      | 7825450                        | (C/A)       |
| 18546       | CakSNP18546    | <i>Kabuli</i>    | <i>Ca_Kabuli_denovo</i>      | 7832200                        | (T/G)       |
| 18547       | CakSNP18547    | <i>Kabuli</i>    | <i>Ca_Kabuli_denovo</i>      | 7833031                        | (G/A)       |
| 18548       | CakSNP18548    | <i>Kabuli</i>    | <i>Ca_Kabuli_denovo</i>      | 7842059                        | (A/G)       |
| 18549       | CakSNP18549    | <i>Kabuli</i>    | <i>Ca_Kabuli_denovo</i>      | 7845807                        | (C/A)       |
| 18550       | CakSNP18550    | <i>Kabuli</i>    | <i>Ca_Kabuli_denovo</i>      | 7845827                        | (C/A)       |
| 18551       | CakSNP18551    | <i>Kabuli</i>    | <i>Ca_Kabuli_denovo</i>      | 7851012                        | (G/A)       |
| 18552       | CakSNP18552    | <i>Kabuli</i>    | <i>Ca_Kabuli_denovo</i>      | 7851036                        | (T/C)       |
| 18553       | CakSNP18553    | <i>Kabuli</i>    | <i>Ca_Kabuli_denovo</i>      | 7851360                        | (G/A)       |
| 18554       | CakSNP18554    | <i>Kabuli</i>    | <i>Ca_Kabuli_denovo</i>      | 7851364                        | (C/G)       |
| 18555       | CakSNP18555    | <i>Kabuli</i>    | <i>Ca_Kabuli_denovo</i>      | 7851413                        | (A/G)       |
| 18556       | CakSNP18556    | <i>Kabuli</i>    | <i>Ca_Kabuli_denovo</i>      | 7855438                        | (T/C)       |
| 18557       | CakSNP18557    | <i>Kabuli</i>    | <i>Ca_Kabuli_denovo</i>      | 7855500                        | (A/G)       |
| 18558       | CakSNP18558    | <i>Kabuli</i>    | <i>Ca_Kabuli_denovo</i>      | 7858167                        | (T/C)       |
| 18559       | CakSNP18559    | <i>Kabuli</i>    | <i>Ca_Kabuli_denovo</i>      | 7866944                        | (C/T)       |
| 18560       | CakSNP18560    | <i>Kabuli</i>    | <i>Ca_Kabuli_denovo</i>      | 7867542                        | (A/G)       |
| 18561       | CakSNP18561    | <i>Kabuli</i>    | <i>Ca_Kabuli_denovo</i>      | 7867799                        | (A/C)       |
| 18562       | CakSNP18562    | <i>Kabuli</i>    | <i>Ca_Kabuli_denovo</i>      | 7876080                        | (A/T)       |

| <b>S.N.</b> | <b>SNP IDs</b> | <b>Cultivars</b> | <b>Chromosomes/scaffolds</b> | <b>Physical positions (bp)</b> | <b>SNPs</b> |
|-------------|----------------|------------------|------------------------------|--------------------------------|-------------|
| 18563       | CakSNP18563    | <i>Kabuli</i>    | <i>Ca_Kabuli_denovo</i>      | 7880716                        | (A/T)       |
| 18564       | CakSNP18564    | <i>Kabuli</i>    | <i>Ca_Kabuli_denovo</i>      | 7880717                        | (C/T)       |
| 18565       | CakSNP18565    | <i>Kabuli</i>    | <i>Ca_Kabuli_denovo</i>      | 7881296                        | (G/A)       |
| 18566       | CakSNP18566    | <i>Kabuli</i>    | <i>Ca_Kabuli_denovo</i>      | 7881314                        | (G/A)       |
| 18567       | CakSNP18567    | <i>Kabuli</i>    | <i>Ca_Kabuli_denovo</i>      | 7887564                        | (C/T)       |
| 18568       | CakSNP18568    | <i>Kabuli</i>    | <i>Ca_Kabuli_denovo</i>      | 7888564                        | (A/G)       |
| 18569       | CakSNP18569    | <i>Kabuli</i>    | <i>Ca_Kabuli_denovo</i>      | 7892719                        | (T/C)       |
| 18570       | CakSNP18570    | <i>Kabuli</i>    | <i>Ca_Kabuli_denovo</i>      | 7894702                        | (C/A)       |
| 18571       | CakSNP18571    | <i>Kabuli</i>    | <i>Ca_Kabuli_denovo</i>      | 7894708                        | (G/C)       |
| 18572       | CakSNP18572    | <i>Kabuli</i>    | <i>Ca_Kabuli_denovo</i>      | 7897351                        | (G/A)       |
| 18573       | CakSNP18573    | <i>Kabuli</i>    | <i>Ca_Kabuli_denovo</i>      | 7897373                        | (A/C)       |
| 18574       | CakSNP18574    | <i>Kabuli</i>    | <i>Ca_Kabuli_denovo</i>      | 7900400                        | (T/C)       |
| 18575       | CakSNP18575    | <i>Kabuli</i>    | <i>Ca_Kabuli_denovo</i>      | 7901584                        | (A/G)       |
| 18576       | CakSNP18576    | <i>Kabuli</i>    | <i>Ca_Kabuli_denovo</i>      | 7901585                        | (T/C)       |
| 18577       | CakSNP18577    | <i>Kabuli</i>    | <i>Ca_Kabuli_denovo</i>      | 7910500                        | (C/T)       |
| 18578       | CakSNP18578    | <i>Kabuli</i>    | <i>Ca_Kabuli_denovo</i>      | 7910554                        | (G/A)       |
| 18579       | CakSNP18579    | <i>Kabuli</i>    | <i>Ca_Kabuli_denovo</i>      | 7920197                        | (C/T)       |
| 18580       | CakSNP18580    | <i>Kabuli</i>    | <i>Ca_Kabuli_denovo</i>      | 7920209                        | (G/A)       |
| 18581       | CakSNP18581    | <i>Kabuli</i>    | <i>Ca_Kabuli_denovo</i>      | 7930088                        | (T/G)       |
| 18582       | CakSNP18582    | <i>Kabuli</i>    | <i>Ca_Kabuli_denovo</i>      | 7936283                        | (C/T)       |
| 18583       | CakSNP18583    | <i>Kabuli</i>    | <i>Ca_Kabuli_denovo</i>      | 7936329                        | (T/G)       |
| 18584       | CakSNP18584    | <i>Kabuli</i>    | <i>Ca_Kabuli_denovo</i>      | 7941133                        | (C/T)       |
| 18585       | CakSNP18585    | <i>Kabuli</i>    | <i>Ca_Kabuli_denovo</i>      | 7941147                        | (T/C)       |
| 18586       | CakSNP18586    | <i>Kabuli</i>    | <i>Ca_Kabuli_denovo</i>      | 7945108                        | (G/A)       |
| 18587       | CakSNP18587    | <i>Kabuli</i>    | <i>Ca_Kabuli_denovo</i>      | 7949240                        | (G/C)       |
| 18588       | CakSNP18588    | <i>Kabuli</i>    | <i>Ca_Kabuli_denovo</i>      | 7949247                        | (G/C)       |
| 18589       | CakSNP18589    | <i>Kabuli</i>    | <i>Ca_Kabuli_denovo</i>      | 7952539                        | (A/G)       |
| 18590       | CakSNP18590    | <i>Kabuli</i>    | <i>Ca_Kabuli_denovo</i>      | 7952565                        | (T/C)       |
| 18591       | CakSNP18591    | <i>Kabuli</i>    | <i>Ca_Kabuli_denovo</i>      | 7953341                        | (G/C)       |
| 18592       | CakSNP18592    | <i>Kabuli</i>    | <i>Ca_Kabuli_denovo</i>      | 7955422                        | (T/C)       |
| 18593       | CakSNP18593    | <i>Kabuli</i>    | <i>Ca_Kabuli_denovo</i>      | 7955973                        | (G/C)       |
| 18594       | CakSNP18594    | <i>Kabuli</i>    | <i>Ca_Kabuli_denovo</i>      | 7955994                        | (G/T)       |
| 18595       | CakSNP18595    | <i>Kabuli</i>    | <i>Ca_Kabuli_denovo</i>      | 7956631                        | (T/C)       |
| 18596       | CakSNP18596    | <i>Kabuli</i>    | <i>Ca_Kabuli_denovo</i>      | 7960635                        | (C/T)       |
| 18597       | CakSNP18597    | <i>Kabuli</i>    | <i>Ca_Kabuli_denovo</i>      | 7962856                        | (C/T)       |
| 18598       | CakSNP18598    | <i>Kabuli</i>    | <i>Ca_Kabuli_denovo</i>      | 7962883                        | (G/C)       |
| 18599       | CakSNP18599    | <i>Kabuli</i>    | <i>Ca_Kabuli_denovo</i>      | 7963369                        | (A/G)       |
| 18600       | CakSNP18600    | <i>Kabuli</i>    | <i>Ca_Kabuli_denovo</i>      | 7963390                        | (G/C)       |
| 18601       | CakSNP18601    | <i>Kabuli</i>    | <i>Ca_Kabuli_denovo</i>      | 7970950                        | (G/C)       |

| <b>S.N.</b> | <b>SNP IDs</b> | <b>Cultivars</b> | <b>Chromosomes/scaffolds</b> | <b>Physical positions (bp)</b> | <b>SNPs</b> |
|-------------|----------------|------------------|------------------------------|--------------------------------|-------------|
| 18602       | CakSNP18602    | <i>Kabuli</i>    | <i>Ca_Kabuli_denovo</i>      | 7974031                        | (G/C)       |
| 18603       | CakSNP18603    | <i>Kabuli</i>    | <i>Ca_Kabuli_denovo</i>      | 7974052                        | (C/G)       |
| 18604       | CakSNP18604    | <i>Kabuli</i>    | <i>Ca_Kabuli_denovo</i>      | 7982597                        | (A/G)       |
| 18605       | CakSNP18605    | <i>Kabuli</i>    | <i>Ca_Kabuli_denovo</i>      | 7988467                        | (G/A)       |
| 18606       | CakSNP18606    | <i>Kabuli</i>    | <i>Ca_Kabuli_denovo</i>      | 7995056                        | (A/G)       |
| 18607       | CakSNP18607    | <i>Kabuli</i>    | <i>Ca_Kabuli_denovo</i>      | 7995068                        | (C/T)       |
| 18608       | CakSNP18608    | <i>Kabuli</i>    | <i>Ca_Kabuli_denovo</i>      | 7997461                        | (T/C)       |
| 18609       | CakSNP18609    | <i>Kabuli</i>    | <i>Ca_Kabuli_denovo</i>      | 7999842                        | (T/G)       |
| 18610       | CakSNP18610    | <i>Kabuli</i>    | <i>Ca_Kabuli_denovo</i>      | 7999848                        | (T/A)       |
| 18611       | CakSNP18611    | <i>Kabuli</i>    | <i>Ca_Kabuli_denovo</i>      | 8001503                        | (T/C)       |
| 18612       | CakSNP18612    | <i>Kabuli</i>    | <i>Ca_Kabuli_denovo</i>      | 8003727                        | (A/G)       |
| 18613       | CakSNP18613    | <i>Kabuli</i>    | <i>Ca_Kabuli_denovo</i>      | 8003736                        | (A/G)       |
| 18614       | CakSNP18614    | <i>Kabuli</i>    | <i>Ca_Kabuli_denovo</i>      | 8011242                        | (G/C)       |
| 18615       | CakSNP18615    | <i>Kabuli</i>    | <i>Ca_Kabuli_denovo</i>      | 8011262                        | (C/T)       |
| 18616       | CakSNP18616    | <i>Kabuli</i>    | <i>Ca_Kabuli_denovo</i>      | 8013352                        | (C/T)       |
| 18617       | CakSNP18617    | <i>Kabuli</i>    | <i>Ca_Kabuli_denovo</i>      | 8019793                        | (C/A)       |
| 18618       | CakSNP18618    | <i>Kabuli</i>    | <i>Ca_Kabuli_denovo</i>      | 8022307                        | (G/A)       |
| 18619       | CakSNP18619    | <i>Kabuli</i>    | <i>Ca_Kabuli_denovo</i>      | 8022322                        | (C/G)       |
| 18620       | CakSNP18620    | <i>Kabuli</i>    | <i>Ca_Kabuli_denovo</i>      | 8022996                        | (A/G)       |
| 18621       | CakSNP18621    | <i>Kabuli</i>    | <i>Ca_Kabuli_denovo</i>      | 8026787                        | (T/G)       |
| 18622       | CakSNP18622    | <i>Kabuli</i>    | <i>Ca_Kabuli_denovo</i>      | 8026830                        | (G/C)       |
| 18623       | CakSNP18623    | <i>Kabuli</i>    | <i>Ca_Kabuli_denovo</i>      | 8027198                        | (T/C)       |
| 18624       | CakSNP18624    | <i>Kabuli</i>    | <i>Ca_Kabuli_denovo</i>      | 8027199                        | (T/C)       |
| 18625       | CakSNP18625    | <i>Kabuli</i>    | <i>Ca_Kabuli_denovo</i>      | 8039817                        | (T/C)       |
| 18626       | CakSNP18626    | <i>Kabuli</i>    | <i>Ca_Kabuli_denovo</i>      | 8041747                        | (T/C)       |
| 18627       | CakSNP18627    | <i>Kabuli</i>    | <i>Ca_Kabuli_denovo</i>      | 8041759                        | (C/A)       |
| 18628       | CakSNP18628    | <i>Kabuli</i>    | <i>Ca_Kabuli_denovo</i>      | 8043209                        | (A/G)       |
| 18629       | CakSNP18629    | <i>Kabuli</i>    | <i>Ca_Kabuli_denovo</i>      | 8043253                        | (T/C)       |
| 18630       | CakSNP18630    | <i>Kabuli</i>    | <i>Ca_Kabuli_denovo</i>      | 8044069                        | (A/G)       |
| 18631       | CakSNP18631    | <i>Kabuli</i>    | <i>Ca_Kabuli_denovo</i>      | 8044129                        | (G/A)       |
| 18632       | CakSNP18632    | <i>Kabuli</i>    | <i>Ca_Kabuli_denovo</i>      | 8045895                        | (A/G)       |
| 18633       | CakSNP18633    | <i>Kabuli</i>    | <i>Ca_Kabuli_denovo</i>      | 8051714                        | (T/C)       |
| 18634       | CakSNP18634    | <i>Kabuli</i>    | <i>Ca_Kabuli_denovo</i>      | 8057562                        | (G/A)       |
| 18635       | CakSNP18635    | <i>Kabuli</i>    | <i>Ca_Kabuli_denovo</i>      | 8063940                        | (A/T)       |
| 18636       | CakSNP18636    | <i>Kabuli</i>    | <i>Ca_Kabuli_denovo</i>      | 8069087                        | (C/A)       |
| 18637       | CakSNP18637    | <i>Kabuli</i>    | <i>Ca_Kabuli_denovo</i>      | 8069369                        | (G/C)       |
| 18638       | CakSNP18638    | <i>Kabuli</i>    | <i>Ca_Kabuli_denovo</i>      | 8070193                        | (G/C)       |
| 18639       | CakSNP18639    | <i>Kabuli</i>    | <i>Ca_Kabuli_denovo</i>      | 8070240                        | (T/C)       |
| 18640       | CakSNP18640    | <i>Kabuli</i>    | <i>Ca_Kabuli_denovo</i>      | 8072550                        | (C/T)       |

| <b>S.N.</b> | <b>SNP IDs</b> | <b>Cultivars</b> | <b>Chromosomes/scaffolds</b> | <b>Physical positions (bp)</b> | <b>SNPs</b> |
|-------------|----------------|------------------|------------------------------|--------------------------------|-------------|
| 18641       | CakSNP18641    | <i>Kabuli</i>    | <i>Ca_Kabuli_denovo</i>      | 8082932                        | (G/A)       |
| 18642       | CakSNP18642    | <i>Kabuli</i>    | <i>Ca_Kabuli_denovo</i>      | 8083232                        | (A/G)       |
| 18643       | CakSNP18643    | <i>Kabuli</i>    | <i>Ca_Kabuli_denovo</i>      | 8087512                        | (A/G)       |
| 18644       | CakSNP18644    | <i>Kabuli</i>    | <i>Ca_Kabuli_denovo</i>      | 8087573                        | (A/G)       |
| 18645       | CakSNP18645    | <i>Kabuli</i>    | <i>Ca_Kabuli_denovo</i>      | 8088037                        | (C/G)       |
| 18646       | CakSNP18646    | <i>Kabuli</i>    | <i>Ca_Kabuli_denovo</i>      | 8088041                        | (T/C)       |
| 18647       | CakSNP18647    | <i>Kabuli</i>    | <i>Ca_Kabuli_denovo</i>      | 8088319                        | (C/T)       |
| 18648       | CakSNP18648    | <i>Kabuli</i>    | <i>Ca_Kabuli_denovo</i>      | 8088322                        | (G/C)       |
| 18649       | CakSNP18649    | <i>Kabuli</i>    | <i>Ca_Kabuli_denovo</i>      | 8094162                        | (A/C)       |
| 18650       | CakSNP18650    | <i>Kabuli</i>    | <i>Ca_Kabuli_denovo</i>      | 8098520                        | (A/G)       |
| 18651       | CakSNP18651    | <i>Kabuli</i>    | <i>Ca_Kabuli_denovo</i>      | 8105899                        | (T/G)       |
| 18652       | CakSNP18652    | <i>Kabuli</i>    | <i>Ca_Kabuli_denovo</i>      | 8105968                        | (T/C)       |
| 18653       | CakSNP18653    | <i>Kabuli</i>    | <i>Ca_Kabuli_denovo</i>      | 8109763                        | (A/C)       |
| 18654       | CakSNP18654    | <i>Kabuli</i>    | <i>Ca_Kabuli_denovo</i>      | 8112263                        | (A/G)       |
| 18655       | CakSNP18655    | <i>Kabuli</i>    | <i>Ca_Kabuli_denovo</i>      | 8112296                        | (A/C)       |
| 18656       | CakSNP18656    | <i>Kabuli</i>    | <i>Ca_Kabuli_denovo</i>      | 8112297                        | (G/C)       |
| 18657       | CakSNP18657    | <i>Kabuli</i>    | <i>Ca_Kabuli_denovo</i>      | 8115320                        | (A/G)       |
| 18658       | CakSNP18658    | <i>Kabuli</i>    | <i>Ca_Kabuli_denovo</i>      | 8122096                        | (T/C)       |
| 18659       | CakSNP18659    | <i>Kabuli</i>    | <i>Ca_Kabuli_denovo</i>      | 8130858                        | (G/A)       |
| 18660       | CakSNP18660    | <i>Kabuli</i>    | <i>Ca_Kabuli_denovo</i>      | 8130859                        | (C/G)       |
| 18661       | CakSNP18661    | <i>Kabuli</i>    | <i>Ca_Kabuli_denovo</i>      | 8137324                        | (C/T)       |
| 18662       | CakSNP18662    | <i>Kabuli</i>    | <i>Ca_Kabuli_denovo</i>      | 8137330                        | (T/G)       |
| 18663       | CakSNP18663    | <i>Kabuli</i>    | <i>Ca_Kabuli_denovo</i>      | 8141933                        | (A/G)       |
| 18664       | CakSNP18664    | <i>Kabuli</i>    | <i>Ca_Kabuli_denovo</i>      | 8144021                        | (A/C)       |
| 18665       | CakSNP18665    | <i>Kabuli</i>    | <i>Ca_Kabuli_denovo</i>      | 8144078                        | (G/A)       |
| 18666       | CakSNP18666    | <i>Kabuli</i>    | <i>Ca_Kabuli_denovo</i>      | 8148859                        | (G/A)       |
| 18667       | CakSNP18667    | <i>Kabuli</i>    | <i>Ca_Kabuli_denovo</i>      | 8148868                        | (C/A)       |
| 18668       | CakSNP18668    | <i>Kabuli</i>    | <i>Ca_Kabuli_denovo</i>      | 8149952                        | (C/G)       |
| 18669       | CakSNP18669    | <i>Kabuli</i>    | <i>Ca_Kabuli_denovo</i>      | 8149954                        | (A/G)       |
| 18670       | CakSNP18670    | <i>Kabuli</i>    | <i>Ca_Kabuli_denovo</i>      | 8154225                        | (C/A)       |
| 18671       | CakSNP18671    | <i>Kabuli</i>    | <i>Ca_Kabuli_denovo</i>      | 8158725                        | (C/T)       |
| 18672       | CakSNP18672    | <i>Kabuli</i>    | <i>Ca_Kabuli_denovo</i>      | 8158779                        | (T/C)       |
| 18673       | CakSNP18673    | <i>Kabuli</i>    | <i>Ca_Kabuli_denovo</i>      | 8159110                        | (A/G)       |
| 18674       | CakSNP18674    | <i>Kabuli</i>    | <i>Ca_Kabuli_denovo</i>      | 8159113                        | (A/G)       |
| 18675       | CakSNP18675    | <i>Kabuli</i>    | <i>Ca_Kabuli_denovo</i>      | 8168485                        | (A/G)       |
| 18676       | CakSNP18676    | <i>Kabuli</i>    | <i>Ca_Kabuli_denovo</i>      | 8169341                        | (C/G)       |
| 18677       | CakSNP18677    | <i>Kabuli</i>    | <i>Ca_Kabuli_denovo</i>      | 8171387                        | (G/C)       |
| 18678       | CakSNP18678    | <i>Kabuli</i>    | <i>Ca_Kabuli_denovo</i>      | 8178754                        | (T/C)       |
| 18679       | CakSNP18679    | <i>Kabuli</i>    | <i>Ca_Kabuli_denovo</i>      | 8184848                        | (C/A)       |



| <b>S.N.</b> | <b>SNP IDs</b> | <b>Cultivars</b> | <b>Chromosomes/scaffolds</b> | <b>Physical positions (bp)</b> | <b>SNPs</b> |
|-------------|----------------|------------------|------------------------------|--------------------------------|-------------|
| 18680       | CakSNP18680    | <i>Kabuli</i>    | <i>Ca_Kabuli_denovo</i>      | 8189540                        | (A/C)       |
| 18681       | CakSNP18681    | <i>Kabuli</i>    | <i>Ca_Kabuli_denovo</i>      | 8196300                        | (T/C)       |
| 18682       | CakSNP18682    | <i>Kabuli</i>    | <i>Ca_Kabuli_denovo</i>      | 8196341                        | (C/G)       |
| 18683       | CakSNP18683    | <i>Kabuli</i>    | <i>Ca_Kabuli_denovo</i>      | 8203367                        | (G/A)       |
| 18684       | CakSNP18684    | <i>Kabuli</i>    | <i>Ca_Kabuli_denovo</i>      | 8207563                        | (C/T)       |
| 18685       | CakSNP18685    | <i>Kabuli</i>    | <i>Ca_Kabuli_denovo</i>      | 8210958                        | (C/G)       |
| 18686       | CakSNP18686    | <i>Kabuli</i>    | <i>Ca_Kabuli_denovo</i>      | 8211907                        | (A/G)       |
| 18687       | CakSNP18687    | <i>Kabuli</i>    | <i>Ca_Kabuli_denovo</i>      | 8214133                        | (A/G)       |
| 18688       | CakSNP18688    | <i>Kabuli</i>    | <i>Ca_Kabuli_denovo</i>      | 8214554                        | (T/C)       |
| 18689       | CakSNP18689    | <i>Kabuli</i>    | <i>Ca_Kabuli_denovo</i>      | 8214590                        | (A/G)       |
| 18690       | CakSNP18690    | <i>Kabuli</i>    | <i>Ca_Kabuli_denovo</i>      | 8217362                        | (A/G)       |
| 18691       | CakSNP18691    | <i>Kabuli</i>    | <i>Ca_Kabuli_denovo</i>      | 8218000                        | (C/G)       |
| 18692       | CakSNP18692    | <i>Kabuli</i>    | <i>Ca_Kabuli_denovo</i>      | 8218005                        | (A/C)       |
| 18693       | CakSNP18693    | <i>Kabuli</i>    | <i>Ca_Kabuli_denovo</i>      | 8219090                        | (G/T)       |
| 18694       | CakSNP18694    | <i>Kabuli</i>    | <i>Ca_Kabuli_denovo</i>      | 8223822                        | (C/G)       |
| 18695       | CakSNP18695    | <i>Kabuli</i>    | <i>Ca_Kabuli_denovo</i>      | 8226812                        | (C/T)       |
| 18696       | CakSNP18696    | <i>Kabuli</i>    | <i>Ca_Kabuli_denovo</i>      | 8230958                        | (C/G)       |
| 18697       | CakSNP18697    | <i>Kabuli</i>    | <i>Ca_Kabuli_denovo</i>      | 8230966                        | (A/T)       |
| 18698       | CakSNP18698    | <i>Kabuli</i>    | <i>Ca_Kabuli_denovo</i>      | 8232844                        | (G/A)       |
| 18699       | CakSNP18699    | <i>Kabuli</i>    | <i>Ca_Kabuli_denovo</i>      | 8232880                        | (G/A)       |
| 18700       | CakSNP18700    | <i>Kabuli</i>    | <i>Ca_Kabuli_denovo</i>      | 8234144                        | (A/G)       |
| 18701       | CakSNP18701    | <i>Kabuli</i>    | <i>Ca_Kabuli_denovo</i>      | 8234153                        | (C/G)       |
| 18702       | CakSNP18702    | <i>Kabuli</i>    | <i>Ca_Kabuli_denovo</i>      | 8241946                        | (C/T)       |
| 18703       | CakSNP18703    | <i>Kabuli</i>    | <i>Ca_Kabuli_denovo</i>      | 8241952                        | (C/T)       |
| 18704       | CakSNP18704    | <i>Kabuli</i>    | <i>Ca_Kabuli_denovo</i>      | 8242371                        | (G/A)       |
| 18705       | CakSNP18705    | <i>Kabuli</i>    | <i>Ca_Kabuli_denovo</i>      | 8243836                        | (T/C)       |
| 18706       | CakSNP18706    | <i>Kabuli</i>    | <i>Ca_Kabuli_denovo</i>      | 8244667                        | (C/T)       |
| 18707       | CakSNP18707    | <i>Kabuli</i>    | <i>Ca_Kabuli_denovo</i>      | 8249352                        | (C/A)       |
| 18708       | CakSNP18708    | <i>Kabuli</i>    | <i>Ca_Kabuli_denovo</i>      | 8256558                        | (C/T)       |
| 18709       | CakSNP18709    | <i>Kabuli</i>    | <i>Ca_Kabuli_denovo</i>      | 8256561                        | (C/T)       |
| 18710       | CakSNP18710    | <i>Kabuli</i>    | <i>Ca_Kabuli_denovo</i>      | 8257059                        | (C/T)       |
| 18711       | CakSNP18711    | <i>Kabuli</i>    | <i>Ca_Kabuli_denovo</i>      | 8257088                        | (A/G)       |
| 18712       | CakSNP18712    | <i>Kabuli</i>    | <i>Ca_Kabuli_denovo</i>      | 8261284                        | (C/G)       |
| 18713       | CakSNP18713    | <i>Kabuli</i>    | <i>Ca_Kabuli_denovo</i>      | 8266889                        | (C/T)       |
| 18714       | CakSNP18714    | <i>Kabuli</i>    | <i>Ca_Kabuli_denovo</i>      | 8269821                        | (A/G)       |
| 18715       | CakSNP18715    | <i>Kabuli</i>    | <i>Ca_Kabuli_denovo</i>      | 8271190                        | (C/G)       |
| 18716       | CakSNP18716    | <i>Kabuli</i>    | <i>Ca_Kabuli_denovo</i>      | 8271195                        | (G/C)       |
| 18717       | CakSNP18717    | <i>Kabuli</i>    | <i>Ca_Kabuli_denovo</i>      | 8283720                        | (C/T)       |
| 18718       | CakSNP18718    | <i>Kabuli</i>    | <i>Ca_Kabuli_denovo</i>      | 8283723                        | (T/C)       |

| <b>S.N.</b> | <b>SNP IDs</b> | <b>Cultivars</b> | <b>Chromosomes/scaffolds</b> | <b>Physical positions (bp)</b> | <b>SNPs</b> |
|-------------|----------------|------------------|------------------------------|--------------------------------|-------------|
| 18719       | CakSNP18719    | <i>Kabuli</i>    | <i>Ca_Kabuli_denovo</i>      | 8287800                        | (G/T)       |
| 18720       | CakSNP18720    | <i>Kabuli</i>    | <i>Ca_Kabuli_denovo</i>      | 8289104                        | (C/T)       |
| 18721       | CakSNP18721    | <i>Kabuli</i>    | <i>Ca_Kabuli_denovo</i>      | 8293206                        | (G/T)       |
| 18722       | CakSNP18722    | <i>Kabuli</i>    | <i>Ca_Kabuli_denovo</i>      | 8297749                        | (A/C)       |
| 18723       | CakSNP18723    | <i>Kabuli</i>    | <i>Ca_Kabuli_denovo</i>      | 8300470                        | (T/G)       |
| 18724       | CakSNP18724    | <i>Kabuli</i>    | <i>Ca_Kabuli_denovo</i>      | 8300931                        | (A/G)       |
| 18725       | CakSNP18725    | <i>Kabuli</i>    | <i>Ca_Kabuli_denovo</i>      | 8300939                        | (T/A)       |
| 18726       | CakSNP18726    | <i>Kabuli</i>    | <i>Ca_Kabuli_denovo</i>      | 8303497                        | (T/C)       |
| 18727       | CakSNP18727    | <i>Kabuli</i>    | <i>Ca_Kabuli_denovo</i>      | 8303505                        | (C/G)       |
| 18728       | CakSNP18728    | <i>Kabuli</i>    | <i>Ca_Kabuli_denovo</i>      | 8305655                        | (A/G)       |
| 18729       | CakSNP18729    | <i>Kabuli</i>    | <i>Ca_Kabuli_denovo</i>      | 8305661                        | (G/A)       |
| 18730       | CakSNP18730    | <i>Kabuli</i>    | <i>Ca_Kabuli_denovo</i>      | 8306153                        | (G/A)       |
| 18731       | CakSNP18731    | <i>Kabuli</i>    | <i>Ca_Kabuli_denovo</i>      | 8317400                        | (G/C)       |
| 18732       | CakSNP18732    | <i>Kabuli</i>    | <i>Ca_Kabuli_denovo</i>      | 8317564                        | (G/C)       |
| 18733       | CakSNP18733    | <i>Kabuli</i>    | <i>Ca_Kabuli_denovo</i>      | 8317582                        | (C/T)       |
| 18734       | CakSNP18734    | <i>Kabuli</i>    | <i>Ca_Kabuli_denovo</i>      | 8321061                        | (C/T)       |
| 18735       | CakSNP18735    | <i>Kabuli</i>    | <i>Ca_Kabuli_denovo</i>      | 8322931                        | (G/A)       |
| 18736       | CakSNP18736    | <i>Kabuli</i>    | <i>Ca_Kabuli_denovo</i>      | 8325194                        | (C/T)       |
| 18737       | CakSNP18737    | <i>Kabuli</i>    | <i>Ca_Kabuli_denovo</i>      | 8325213                        | (C/A)       |
| 18738       | CakSNP18738    | <i>Kabuli</i>    | <i>Ca_Kabuli_denovo</i>      | 8327042                        | (C/T)       |
| 18739       | CakSNP18739    | <i>Kabuli</i>    | <i>Ca_Kabuli_denovo</i>      | 8327887                        | (A/G)       |
| 18740       | CakSNP18740    | <i>Kabuli</i>    | <i>Ca_Kabuli_denovo</i>      | 8327890                        | (A/G)       |
| 18741       | CakSNP18741    | <i>Kabuli</i>    | <i>Ca_Kabuli_denovo</i>      | 8328850                        | (G/A)       |
| 18742       | CakSNP18742    | <i>Kabuli</i>    | <i>Ca_Kabuli_denovo</i>      | 8329853                        | (G/T)       |
| 18743       | CakSNP18743    | <i>Kabuli</i>    | <i>Ca_Kabuli_denovo</i>      | 8329859                        | (G/A)       |
| 18744       | CakSNP18744    | <i>Kabuli</i>    | <i>Ca_Kabuli_denovo</i>      | 8331379                        | (C/T)       |
| 18745       | CakSNP18745    | <i>Kabuli</i>    | <i>Ca_Kabuli_denovo</i>      | 8335396                        | (T/C)       |
| 18746       | CakSNP18746    | <i>Kabuli</i>    | <i>Ca_Kabuli_denovo</i>      | 8335402                        | (T/G)       |
| 18747       | CakSNP18747    | <i>Kabuli</i>    | <i>Ca_Kabuli_denovo</i>      | 8336646                        | (G/C)       |
| 18748       | CakSNP18748    | <i>Kabuli</i>    | <i>Ca_Kabuli_denovo</i>      | 8336655                        | (T/C)       |
| 18749       | CakSNP18749    | <i>Kabuli</i>    | <i>Ca_Kabuli_denovo</i>      | 8336819                        | (G/A)       |
| 18750       | CakSNP18750    | <i>Kabuli</i>    | <i>Ca_Kabuli_denovo</i>      | 8336864                        | (A/G)       |
| 18751       | CakSNP18751    | <i>Kabuli</i>    | <i>Ca_Kabuli_denovo</i>      | 8337449                        | (T/G)       |
| 18752       | CakSNP18752    | <i>Kabuli</i>    | <i>Ca_Kabuli_denovo</i>      | 8343165                        | (A/G)       |
| 18753       | CakSNP18753    | <i>Kabuli</i>    | <i>Ca_Kabuli_denovo</i>      | 8349391                        | (G/C)       |
| 18754       | CakSNP18754    | <i>Kabuli</i>    | <i>Ca_Kabuli_denovo</i>      | 8349400                        | (C/T)       |
| 18755       | CakSNP18755    | <i>Kabuli</i>    | <i>Ca_Kabuli_denovo</i>      | 8350117                        | (T/G)       |
| 18756       | CakSNP18756    | <i>Kabuli</i>    | <i>Ca_Kabuli_denovo</i>      | 8350148                        | (C/G)       |
| 18757       | CakSNP18757    | <i>Kabuli</i>    | <i>Ca_Kabuli_denovo</i>      | 8353015                        | (G/T)       |

| <b>S.N.</b> | <b>SNP IDs</b> | <b>Cultivars</b> | <b>Chromosomes/scaffolds</b> | <b>Physical positions (bp)</b> | <b>SNPs</b> |
|-------------|----------------|------------------|------------------------------|--------------------------------|-------------|
| 18758       | CakSNP18758    | <i>Kabuli</i>    | <i>Ca_Kabuli_denovo</i>      | 8354669                        | (A/T)       |
| 18759       | CakSNP18759    | <i>Kabuli</i>    | <i>Ca_Kabuli_denovo</i>      | 8354690                        | (T/C)       |
| 18760       | CakSNP18760    | <i>Kabuli</i>    | <i>Ca_Kabuli_denovo</i>      | 8355827                        | (T/G)       |
| 18761       | CakSNP18761    | <i>Kabuli</i>    | <i>Ca_Kabuli_denovo</i>      | 8360991                        | (C/A)       |
| 18762       | CakSNP18762    | <i>Kabuli</i>    | <i>Ca_Kabuli_denovo</i>      | 8361061                        | (G/A)       |
| 18763       | CakSNP18763    | <i>Kabuli</i>    | <i>Ca_Kabuli_denovo</i>      | 8365868                        | (T/C)       |
| 18764       | CakSNP18764    | <i>Kabuli</i>    | <i>Ca_Kabuli_denovo</i>      | 8365899                        | (G/A)       |
| 18765       | CakSNP18765    | <i>Kabuli</i>    | <i>Ca_Kabuli_denovo</i>      | 8379869                        | (A/C)       |
| 18766       | CakSNP18766    | <i>Kabuli</i>    | <i>Ca_Kabuli_denovo</i>      | 8380718                        | (C/G)       |
| 18767       | CakSNP18767    | <i>Kabuli</i>    | <i>Ca_Kabuli_denovo</i>      | 8380722                        | (G/A)       |
| 18768       | CakSNP18768    | <i>Kabuli</i>    | <i>Ca_Kabuli_denovo</i>      | 8391995                        | (A/G)       |
| 18769       | CakSNP18769    | <i>Kabuli</i>    | <i>Ca_Kabuli_denovo</i>      | 8392015                        | (A/C)       |
| 18770       | CakSNP18770    | <i>Kabuli</i>    | <i>Ca_Kabuli_denovo</i>      | 8400805                        | (C/T)       |
| 18771       | CakSNP18771    | <i>Kabuli</i>    | <i>Ca_Kabuli_denovo</i>      | 8405558                        | (A/G)       |
| 18772       | CakSNP18772    | <i>Kabuli</i>    | <i>Ca_Kabuli_denovo</i>      | 8405615                        | (T/C)       |
| 18773       | CakSNP18773    | <i>Kabuli</i>    | <i>Ca_Kabuli_denovo</i>      | 8409196                        | (T/C)       |
| 18774       | CakSNP18774    | <i>Kabuli</i>    | <i>Ca_Kabuli_denovo</i>      | 8409374                        | (T/C)       |
| 18775       | CakSNP18775    | <i>Kabuli</i>    | <i>Ca_Kabuli_denovo</i>      | 8411035                        | (T/G)       |
| 18776       | CakSNP18776    | <i>Kabuli</i>    | <i>Ca_Kabuli_denovo</i>      | 8411059                        | (T/G)       |
| 18777       | CakSNP18777    | <i>Kabuli</i>    | <i>Ca_Kabuli_denovo</i>      | 8413267                        | (G/C)       |
| 18778       | CakSNP18778    | <i>Kabuli</i>    | <i>Ca_Kabuli_denovo</i>      | 8413291                        | (A/C)       |
| 18779       | CakSNP18779    | <i>Kabuli</i>    | <i>Ca_Kabuli_denovo</i>      | 8416177                        | (T/C)       |
| 18780       | CakSNP18780    | <i>Kabuli</i>    | <i>Ca_Kabuli_denovo</i>      | 8416180                        | (T/C)       |
| 18781       | CakSNP18781    | <i>Kabuli</i>    | <i>Ca_Kabuli_denovo</i>      | 8417405                        | (T/G)       |
| 18782       | CakSNP18782    | <i>Kabuli</i>    | <i>Ca_Kabuli_denovo</i>      | 8417948                        | (G/T)       |
| 18783       | CakSNP18783    | <i>Kabuli</i>    | <i>Ca_Kabuli_denovo</i>      | 8418116                        | (G/C)       |
| 18784       | CakSNP18784    | <i>Kabuli</i>    | <i>Ca_Kabuli_denovo</i>      | 8418159                        | (T/C)       |
| 18785       | CakSNP18785    | <i>Kabuli</i>    | <i>Ca_Kabuli_denovo</i>      | 8419456                        | (C/G)       |
| 18786       | CakSNP18786    | <i>Kabuli</i>    | <i>Ca_Kabuli_denovo</i>      | 8420072                        | (A/C)       |
| 18787       | CakSNP18787    | <i>Kabuli</i>    | <i>Ca_Kabuli_denovo</i>      | 8422556                        | (T/C)       |
| 18788       | CakSNP18788    | <i>Kabuli</i>    | <i>Ca_Kabuli_denovo</i>      | 8423156                        | (T/C)       |
| 18789       | CakSNP18789    | <i>Kabuli</i>    | <i>Ca_Kabuli_denovo</i>      | 8429766                        | (A/C)       |
| 18790       | CakSNP18790    | <i>Kabuli</i>    | <i>Ca_Kabuli_denovo</i>      | 8436507                        | (C/T)       |
| 18791       | CakSNP18791    | <i>Kabuli</i>    | <i>Ca_Kabuli_denovo</i>      | 8436561                        | (G/A)       |
| 18792       | CakSNP18792    | <i>Kabuli</i>    | <i>Ca_Kabuli_denovo</i>      | 8438196                        | (T/G)       |
| 18793       | CakSNP18793    | <i>Kabuli</i>    | <i>Ca_Kabuli_denovo</i>      | 8438207                        | (G/C)       |
| 18794       | CakSNP18794    | <i>Kabuli</i>    | <i>Ca_Kabuli_denovo</i>      | 8448425                        | (G/C)       |
| 18795       | CakSNP18795    | <i>Kabuli</i>    | <i>Ca_Kabuli_denovo</i>      | 8448815                        | (C/A)       |
| 18796       | CakSNP18796    | <i>Kabuli</i>    | <i>Ca_Kabuli_denovo</i>      | 8452890                        | (T/G)       |

| <b>S.N.</b> | <b>SNP IDs</b> | <b>Cultivars</b> | <b>Chromosomes/scaffolds</b> | <b>Physical positions (bp)</b> | <b>SNPs</b> |
|-------------|----------------|------------------|------------------------------|--------------------------------|-------------|
| 18797       | CakSNP18797    | <i>Kabuli</i>    | <i>Ca_Kabuli_denovo</i>      | 8454266                        | (T/C)       |
| 18798       | CakSNP18798    | <i>Kabuli</i>    | <i>Ca_Kabuli_denovo</i>      | 8460560                        | (C/A)       |
| 18799       | CakSNP18799    | <i>Kabuli</i>    | <i>Ca_Kabuli_denovo</i>      | 8461914                        | (C/G)       |
| 18800       | CakSNP18800    | <i>Kabuli</i>    | <i>Ca_Kabuli_denovo</i>      | 8466689                        | (A/G)       |
| 18801       | CakSNP18801    | <i>Kabuli</i>    | <i>Ca_Kabuli_denovo</i>      | 8469963                        | (A/G)       |
| 18802       | CakSNP18802    | <i>Kabuli</i>    | <i>Ca_Kabuli_denovo</i>      | 8469975                        | (C/A)       |
| 18803       | CakSNP18803    | <i>Kabuli</i>    | <i>Ca_Kabuli_denovo</i>      | 8479007                        | (G/T)       |
| 18804       | CakSNP18804    | <i>Kabuli</i>    | <i>Ca_Kabuli_denovo</i>      | 8479010                        | (C/G)       |
| 18805       | CakSNP18805    | <i>Kabuli</i>    | <i>Ca_Kabuli_denovo</i>      | 8480432                        | (C/G)       |
| 18806       | CakSNP18806    | <i>Kabuli</i>    | <i>Ca_Kabuli_denovo</i>      | 8480589                        | (C/T)       |
| 18807       | CakSNP18807    | <i>Kabuli</i>    | <i>Ca_Kabuli_denovo</i>      | 8483863                        | (T/C)       |
| 18808       | CakSNP18808    | <i>Kabuli</i>    | <i>Ca_Kabuli_denovo</i>      | 8486588                        | (G/T)       |
| 18809       | CakSNP18809    | <i>Kabuli</i>    | <i>Ca_Kabuli_denovo</i>      | 8489504                        | (G/A)       |
| 18810       | CakSNP18810    | <i>Kabuli</i>    | <i>Ca_Kabuli_denovo</i>      | 8492446                        | (C/G)       |
| 18811       | CakSNP18811    | <i>Kabuli</i>    | <i>Ca_Kabuli_denovo</i>      | 8492462                        | (A/T)       |
| 18812       | CakSNP18812    | <i>Kabuli</i>    | <i>Ca_Kabuli_denovo</i>      | 8496663                        | (T/G)       |
| 18813       | CakSNP18813    | <i>Kabuli</i>    | <i>Ca_Kabuli_denovo</i>      | 8503771                        | (T/C)       |
| 18814       | CakSNP18814    | <i>Kabuli</i>    | <i>Ca_Kabuli_denovo</i>      | 8503785                        | (T/G)       |
| 18815       | CakSNP18815    | <i>Kabuli</i>    | <i>Ca_Kabuli_denovo</i>      | 8503798                        | (A/G)       |
| 18816       | CakSNP18816    | <i>Kabuli</i>    | <i>Ca_Kabuli_denovo</i>      | 8505482                        | (T/C)       |
| 18817       | CakSNP18817    | <i>Kabuli</i>    | <i>Ca_Kabuli_denovo</i>      | 8505765                        | (G/A)       |
| 18818       | CakSNP18818    | <i>Kabuli</i>    | <i>Ca_Kabuli_denovo</i>      | 8509639                        | (A/G)       |
| 18819       | CakSNP18819    | <i>Kabuli</i>    | <i>Ca_Kabuli_denovo</i>      | 8509669                        | (G/A)       |
| 18820       | CakSNP18820    | <i>Kabuli</i>    | <i>Ca_Kabuli_denovo</i>      | 8513119                        | (A/C)       |
| 18821       | CakSNP18821    | <i>Kabuli</i>    | <i>Ca_Kabuli_denovo</i>      | 8530754                        | (T/C)       |
| 18822       | CakSNP18822    | <i>Kabuli</i>    | <i>Ca_Kabuli_denovo</i>      | 8530755                        | (T/G)       |
| 18823       | CakSNP18823    | <i>Kabuli</i>    | <i>Ca_Kabuli_denovo</i>      | 8531674                        | (C/T)       |
| 18824       | CakSNP18824    | <i>Kabuli</i>    | <i>Ca_Kabuli_denovo</i>      | 8531701                        | (A/T)       |
| 18825       | CakSNP18825    | <i>Kabuli</i>    | <i>Ca_Kabuli_denovo</i>      | 8531753                        | (G/C)       |
| 18826       | CakSNP18826    | <i>Kabuli</i>    | <i>Ca_Kabuli_denovo</i>      | 8531795                        | (G/A)       |
| 18827       | CakSNP18827    | <i>Kabuli</i>    | <i>Ca_Kabuli_denovo</i>      | 8533432                        | (C/T)       |
| 18828       | CakSNP18828    | <i>Kabuli</i>    | <i>Ca_Kabuli_denovo</i>      | 8533441                        | (A/C)       |
| 18829       | CakSNP18829    | <i>Kabuli</i>    | <i>Ca_Kabuli_denovo</i>      | 8533970                        | (A/C)       |
| 18830       | CakSNP18830    | <i>Kabuli</i>    | <i>Ca_Kabuli_denovo</i>      | 8533990                        | (T/C)       |
| 18831       | CakSNP18831    | <i>Kabuli</i>    | <i>Ca_Kabuli_denovo</i>      | 8534449                        | (G/A)       |
| 18832       | CakSNP18832    | <i>Kabuli</i>    | <i>Ca_Kabuli_denovo</i>      | 8550060                        | (A/G)       |
| 18833       | CakSNP18833    | <i>Kabuli</i>    | <i>Ca_Kabuli_denovo</i>      | 8554253                        | (A/T)       |
| 18834       | CakSNP18834    | <i>Kabuli</i>    | <i>Ca_Kabuli_denovo</i>      | 8554325                        | (G/A)       |
| 18835       | CakSNP18835    | <i>Kabuli</i>    | <i>Ca_Kabuli_denovo</i>      | 8556197                        | (G/T)       |

| <b>S.N.</b> | <b>SNP IDs</b> | <b>Cultivars</b> | <b>Chromosomes/scaffolds</b> | <b>Physical positions (bp)</b> | <b>SNPs</b> |
|-------------|----------------|------------------|------------------------------|--------------------------------|-------------|
| 18836       | CakSNP18836    | <i>Kabuli</i>    | <i>Ca_Kabuli_denovo</i>      | 8556200                        | (A/G)       |
| 18837       | CakSNP18837    | <i>Kabuli</i>    | <i>Ca_Kabuli_denovo</i>      | 8556235                        | (C/T)       |
| 18838       | CakSNP18838    | <i>Kabuli</i>    | <i>Ca_Kabuli_denovo</i>      | 8560474                        | (C/G)       |
| 18839       | CakSNP18839    | <i>Kabuli</i>    | <i>Ca_Kabuli_denovo</i>      | 8560544                        | (A/C)       |
| 18840       | CakSNP18840    | <i>Kabuli</i>    | <i>Ca_Kabuli_denovo</i>      | 8562341                        | (G/C)       |
| 18841       | CakSNP18841    | <i>Kabuli</i>    | <i>Ca_Kabuli_denovo</i>      | 8566053                        | (G/T)       |
| 18842       | CakSNP18842    | <i>Kabuli</i>    | <i>Ca_Kabuli_denovo</i>      | 8566099                        | (C/T)       |
| 18843       | CakSNP18843    | <i>Kabuli</i>    | <i>Ca_Kabuli_denovo</i>      | 8571259                        | (A/G)       |
| 18844       | CakSNP18844    | <i>Kabuli</i>    | <i>Ca_Kabuli_denovo</i>      | 8573599                        | (A/T)       |
| 18845       | CakSNP18845    | <i>Kabuli</i>    | <i>Ca_Kabuli_denovo</i>      | 8578805                        | (A/C)       |
| 18846       | CakSNP18846    | <i>Kabuli</i>    | <i>Ca_Kabuli_denovo</i>      | 8580661                        | (G/C)       |
| 18847       | CakSNP18847    | <i>Kabuli</i>    | <i>Ca_Kabuli_denovo</i>      | 8580697                        | (G/T)       |
| 18848       | CakSNP18848    | <i>Kabuli</i>    | <i>Ca_Kabuli_denovo</i>      | 8581281                        | (G/A)       |
| 18849       | CakSNP18849    | <i>Kabuli</i>    | <i>Ca_Kabuli_denovo</i>      | 8584477                        | (A/G)       |
| 18850       | CakSNP18850    | <i>Kabuli</i>    | <i>Ca_Kabuli_denovo</i>      | 8584479                        | (C/A)       |
| 18851       | CakSNP18851    | <i>Kabuli</i>    | <i>Ca_Kabuli_denovo</i>      | 8584858                        | (T/C)       |
| 18852       | CakSNP18852    | <i>Kabuli</i>    | <i>Ca_Kabuli_denovo</i>      | 8584877                        | (G/A)       |
| 18853       | CakSNP18853    | <i>Kabuli</i>    | <i>Ca_Kabuli_denovo</i>      | 8593352                        | (G/C)       |
| 18854       | CakSNP18854    | <i>Kabuli</i>    | <i>Ca_Kabuli_denovo</i>      | 8593359                        | (A/C)       |
| 18855       | CakSNP18855    | <i>Kabuli</i>    | <i>Ca_Kabuli_denovo</i>      | 8603638                        | (C/T)       |
| 18856       | CakSNP18856    | <i>Kabuli</i>    | <i>Ca_Kabuli_denovo</i>      | 8603707                        | (C/A)       |
| 18857       | CakSNP18857    | <i>Kabuli</i>    | <i>Ca_Kabuli_denovo</i>      | 8607036                        | (T/C)       |
| 18858       | CakSNP18858    | <i>Kabuli</i>    | <i>Ca_Kabuli_denovo</i>      | 8623968                        | (C/A)       |
| 18859       | CakSNP18859    | <i>Kabuli</i>    | <i>Ca_Kabuli_denovo</i>      | 8626120                        | (T/C)       |
| 18860       | CakSNP18860    | <i>Kabuli</i>    | <i>Ca_Kabuli_denovo</i>      | 8626123                        | (C/T)       |
| 18861       | CakSNP18861    | <i>Kabuli</i>    | <i>Ca_Kabuli_denovo</i>      | 8629836                        | (A/C)       |
| 18862       | CakSNP18862    | <i>Kabuli</i>    | <i>Ca_Kabuli_denovo</i>      | 8629837                        | (G/C)       |
| 18863       | CakSNP18863    | <i>Kabuli</i>    | <i>Ca_Kabuli_denovo</i>      | 8629839                        | (T/C)       |
| 18864       | CakSNP18864    | <i>Kabuli</i>    | <i>Ca_Kabuli_denovo</i>      | 8630141                        | (T/G)       |
| 18865       | CakSNP18865    | <i>Kabuli</i>    | <i>Ca_Kabuli_denovo</i>      | 8630199                        | (G/C)       |
| 18866       | CakSNP18866    | <i>Kabuli</i>    | <i>Ca_Kabuli_denovo</i>      | 8633226                        | (G/A)       |
| 18867       | CakSNP18867    | <i>Kabuli</i>    | <i>Ca_Kabuli_denovo</i>      | 8633271                        | (G/T)       |
| 18868       | CakSNP18868    | <i>Kabuli</i>    | <i>Ca_Kabuli_denovo</i>      | 8634180                        | (T/C)       |
| 18869       | CakSNP18869    | <i>Kabuli</i>    | <i>Ca_Kabuli_denovo</i>      | 8634188                        | (A/G)       |
| 18870       | CakSNP18870    | <i>Kabuli</i>    | <i>Ca_Kabuli_denovo</i>      | 8642988                        | (A/C)       |
| 18871       | CakSNP18871    | <i>Kabuli</i>    | <i>Ca_Kabuli_denovo</i>      | 8652511                        | (T/A)       |
| 18872       | CakSNP18872    | <i>Kabuli</i>    | <i>Ca_Kabuli_denovo</i>      | 8656524                        | (G/C)       |
| 18873       | CakSNP18873    | <i>Kabuli</i>    | <i>Ca_Kabuli_denovo</i>      | 8657680                        | (G/T)       |
| 18874       | CakSNP18874    | <i>Kabuli</i>    | <i>Ca_Kabuli_denovo</i>      | 8661307                        | (A/G)       |

| <b>S.N.</b> | <b>SNP IDs</b> | <b>Cultivars</b> | <b>Chromosomes/scaffolds</b> | <b>Physical positions (bp)</b> | <b>SNPs</b> |
|-------------|----------------|------------------|------------------------------|--------------------------------|-------------|
| 18875       | CakSNP18875    | <i>Kabuli</i>    | <i>Ca_Kabuli_denovo</i>      | 8661312                        | (G/A)       |
| 18876       | CakSNP18876    | <i>Kabuli</i>    | <i>Ca_Kabuli_denovo</i>      | 8665424                        | (G/A)       |
| 18877       | CakSNP18877    | <i>Kabuli</i>    | <i>Ca_Kabuli_denovo</i>      | 8677202                        | (C/T)       |
| 18878       | CakSNP18878    | <i>Kabuli</i>    | <i>Ca_Kabuli_denovo</i>      | 8677253                        | (T/C)       |
| 18879       | CakSNP18879    | <i>Kabuli</i>    | <i>Ca_Kabuli_denovo</i>      | 8683447                        | (T/C)       |
| 18880       | CakSNP18880    | <i>Kabuli</i>    | <i>Ca_Kabuli_denovo</i>      | 8683473                        | (T/C)       |
| 18881       | CakSNP18881    | <i>Kabuli</i>    | <i>Ca_Kabuli_denovo</i>      | 8688554                        | (G/A)       |
| 18882       | CakSNP18882    | <i>Kabuli</i>    | <i>Ca_Kabuli_denovo</i>      | 8692558                        | (A/G)       |
| 18883       | CakSNP18883    | <i>Kabuli</i>    | <i>Ca_Kabuli_denovo</i>      | 8697009                        | (A/G)       |
| 18884       | CakSNP18884    | <i>Kabuli</i>    | <i>Ca_Kabuli_denovo</i>      | 8701182                        | (C/T)       |
| 18885       | CakSNP18885    | <i>Kabuli</i>    | <i>Ca_Kabuli_denovo</i>      | 8706399                        | (C/T)       |
| 18886       | CakSNP18886    | <i>Kabuli</i>    | <i>Ca_Kabuli_denovo</i>      | 8712116                        | (C/T)       |
| 18887       | CakSNP18887    | <i>Kabuli</i>    | <i>Ca_Kabuli_denovo</i>      | 8712137                        | (C/G)       |
| 18888       | CakSNP18888    | <i>Kabuli</i>    | <i>Ca_Kabuli_denovo</i>      | 8713270                        | (C/A)       |
| 18889       | CakSNP18889    | <i>Kabuli</i>    | <i>Ca_Kabuli_denovo</i>      | 8713287                        | (T/G)       |
| 18890       | CakSNP18890    | <i>Kabuli</i>    | <i>Ca_Kabuli_denovo</i>      | 8714821                        | (G/A)       |
| 18891       | CakSNP18891    | <i>Kabuli</i>    | <i>Ca_Kabuli_denovo</i>      | 8717740                        | (T/C)       |
| 18892       | CakSNP18892    | <i>Kabuli</i>    | <i>Ca_Kabuli_denovo</i>      | 8717768                        | (G/C)       |
| 18893       | CakSNP18893    | <i>Kabuli</i>    | <i>Ca_Kabuli_denovo</i>      | 8718318                        | (T/G)       |
| 18894       | CakSNP18894    | <i>Kabuli</i>    | <i>Ca_Kabuli_denovo</i>      | 8723450                        | (C/T)       |
| 18895       | CakSNP18895    | <i>Kabuli</i>    | <i>Ca_Kabuli_denovo</i>      | 8728039                        | (C/T)       |
| 18896       | CakSNP18896    | <i>Kabuli</i>    | <i>Ca_Kabuli_denovo</i>      | 8728049                        | (T/G)       |
| 18897       | CakSNP18897    | <i>Kabuli</i>    | <i>Ca_Kabuli_denovo</i>      | 8733667                        | (G/T)       |
| 18898       | CakSNP18898    | <i>Kabuli</i>    | <i>Ca_Kabuli_denovo</i>      | 8737564                        | (A/G)       |
| 18899       | CakSNP18899    | <i>Kabuli</i>    | <i>Ca_Kabuli_denovo</i>      | 8740252                        | (C/T)       |
| 18900       | CakSNP18900    | <i>Kabuli</i>    | <i>Ca_Kabuli_denovo</i>      | 8741945                        | (G/A)       |
| 18901       | CakSNP18901    | <i>Kabuli</i>    | <i>Ca_Kabuli_denovo</i>      | 8743682                        | (C/A)       |
| 18902       | CakSNP18902    | <i>Kabuli</i>    | <i>Ca_Kabuli_denovo</i>      | 8745896                        | (T/G)       |
| 18903       | CakSNP18903    | <i>Kabuli</i>    | <i>Ca_Kabuli_denovo</i>      | 8746884                        | (A/G)       |
| 18904       | CakSNP18904    | <i>Kabuli</i>    | <i>Ca_Kabuli_denovo</i>      | 8749660                        | (G/A)       |
| 18905       | CakSNP18905    | <i>Kabuli</i>    | <i>Ca_Kabuli_denovo</i>      | 8749690                        | (C/G)       |
| 18906       | CakSNP18906    | <i>Kabuli</i>    | <i>Ca_Kabuli_denovo</i>      | 8751619                        | (C/A)       |
| 18907       | CakSNP18907    | <i>Kabuli</i>    | <i>Ca_Kabuli_denovo</i>      | 8751625                        | (C/T)       |
| 18908       | CakSNP18908    | <i>Kabuli</i>    | <i>Ca_Kabuli_denovo</i>      | 8754866                        | (C/G)       |
| 18909       | CakSNP18909    | <i>Kabuli</i>    | <i>Ca_Kabuli_denovo</i>      | 8756405                        | (T/A)       |
| 18910       | CakSNP18910    | <i>Kabuli</i>    | <i>Ca_Kabuli_denovo</i>      | 8762906                        | (T/C)       |
| 18911       | CakSNP18911    | <i>Kabuli</i>    | <i>Ca_Kabuli_denovo</i>      | 8764006                        | (C/G)       |
| 18912       | CakSNP18912    | <i>Kabuli</i>    | <i>Ca_Kabuli_denovo</i>      | 8773383                        | (C/A)       |
| 18913       | CakSNP18913    | <i>Kabuli</i>    | <i>Ca_Kabuli_denovo</i>      | 8783399                        | (C/T)       |

| <b>S.N.</b> | <b>SNP IDs</b> | <b>Cultivars</b> | <b>Chromosomes/scaffolds</b> | <b>Physical positions (bp)</b> | <b>SNPs</b> |
|-------------|----------------|------------------|------------------------------|--------------------------------|-------------|
| 18914       | CakSNP18914    | <i>Kabuli</i>    | <i>Ca_Kabuli_denovo</i>      | 8785543                        | (T/A)       |
| 18915       | CakSNP18915    | <i>Kabuli</i>    | <i>Ca_Kabuli_denovo</i>      | 8785573                        | (G/A)       |
| 18916       | CakSNP18916    | <i>Kabuli</i>    | <i>Ca_Kabuli_denovo</i>      | 8785912                        | (A/G)       |
| 18917       | CakSNP18917    | <i>Kabuli</i>    | <i>Ca_Kabuli_denovo</i>      | 8785983                        | (A/C)       |
| 18918       | CakSNP18918    | <i>Kabuli</i>    | <i>Ca_Kabuli_denovo</i>      | 8786375                        | (C/T)       |
| 18919       | CakSNP18919    | <i>Kabuli</i>    | <i>Ca_Kabuli_denovo</i>      | 8786405                        | (T/C)       |
| 18920       | CakSNP18920    | <i>Kabuli</i>    | <i>Ca_Kabuli_denovo</i>      | 8790559                        | (G/A)       |
| 18921       | CakSNP18921    | <i>Kabuli</i>    | <i>Ca_Kabuli_denovo</i>      | 8793365                        | (T/C)       |
| 18922       | CakSNP18922    | <i>Kabuli</i>    | <i>Ca_Kabuli_denovo</i>      | 8797171                        | (C/A)       |
| 18923       | CakSNP18923    | <i>Kabuli</i>    | <i>Ca_Kabuli_denovo</i>      | 8797219                        | (T/C)       |
| 18924       | CakSNP18924    | <i>Kabuli</i>    | <i>Ca_Kabuli_denovo</i>      | 8802899                        | (C/T)       |
| 18925       | CakSNP18925    | <i>Kabuli</i>    | <i>Ca_Kabuli_denovo</i>      | 8802968                        | (C/A)       |
| 18926       | CakSNP18926    | <i>Kabuli</i>    | <i>Ca_Kabuli_denovo</i>      | 8802970                        | (C/G)       |
| 18927       | CakSNP18927    | <i>Kabuli</i>    | <i>Ca_Kabuli_denovo</i>      | 8817440                        | (T/C)       |
| 18928       | CakSNP18928    | <i>Kabuli</i>    | <i>Ca_Kabuli_denovo</i>      | 8817510                        | (C/A)       |
| 18929       | CakSNP18929    | <i>Kabuli</i>    | <i>Ca_Kabuli_denovo</i>      | 8821101                        | (C/T)       |
| 18930       | CakSNP18930    | <i>Kabuli</i>    | <i>Ca_Kabuli_denovo</i>      | 8835782                        | (A/C)       |
| 18931       | CakSNP18931    | <i>Kabuli</i>    | <i>Ca_Kabuli_denovo</i>      | 8837267                        | (C/G)       |
| 18932       | CakSNP18932    | <i>Kabuli</i>    | <i>Ca_Kabuli_denovo</i>      | 8837276                        | (C/G)       |
| 18933       | CakSNP18933    | <i>Kabuli</i>    | <i>Ca_Kabuli_denovo</i>      | 8839300                        | (G/C)       |
| 18934       | CakSNP18934    | <i>Kabuli</i>    | <i>Ca_Kabuli_denovo</i>      | 8839943                        | (C/T)       |
| 18935       | CakSNP18935    | <i>Kabuli</i>    | <i>Ca_Kabuli_denovo</i>      | 8839950                        | (G/A)       |
| 18936       | CakSNP18936    | <i>Kabuli</i>    | <i>Ca_Kabuli_denovo</i>      | 8841891                        | (C/G)       |
| 18937       | CakSNP18937    | <i>Kabuli</i>    | <i>Ca_Kabuli_denovo</i>      | 8843216                        | (T/C)       |
| 18938       | CakSNP18938    | <i>Kabuli</i>    | <i>Ca_Kabuli_denovo</i>      | 8846463                        | (T/C)       |
| 18939       | CakSNP18939    | <i>Kabuli</i>    | <i>Ca_Kabuli_denovo</i>      | 8847644                        | (T/G)       |
| 18940       | CakSNP18940    | <i>Kabuli</i>    | <i>Ca_Kabuli_denovo</i>      | 8847757                        | (A/T)       |
| 18941       | CakSNP18941    | <i>Kabuli</i>    | <i>Ca_Kabuli_denovo</i>      | 8847796                        | (A/G)       |
| 18942       | CakSNP18942    | <i>Kabuli</i>    | <i>Ca_Kabuli_denovo</i>      | 8852097                        | (T/G)       |
| 18943       | CakSNP18943    | <i>Kabuli</i>    | <i>Ca_Kabuli_denovo</i>      | 8855774                        | (G/C)       |
| 18944       | CakSNP18944    | <i>Kabuli</i>    | <i>Ca_Kabuli_denovo</i>      | 8856170                        | (A/C)       |
| 18945       | CakSNP18945    | <i>Kabuli</i>    | <i>Ca_Kabuli_denovo</i>      | 8857655                        | (A/T)       |
| 18946       | CakSNP18946    | <i>Kabuli</i>    | <i>Ca_Kabuli_denovo</i>      | 8858498                        | (A/G)       |
| 18947       | CakSNP18947    | <i>Kabuli</i>    | <i>Ca_Kabuli_denovo</i>      | 8864720                        | (T/G)       |
| 18948       | CakSNP18948    | <i>Kabuli</i>    | <i>Ca_Kabuli_denovo</i>      | 8869813                        | (G/A)       |
| 18949       | CakSNP18949    | <i>Kabuli</i>    | <i>Ca_Kabuli_denovo</i>      | 8881500                        | (A/C)       |
| 18950       | CakSNP18950    | <i>Kabuli</i>    | <i>Ca_Kabuli_denovo</i>      | 8881501                        | (G/A)       |
| 18951       | CakSNP18951    | <i>Kabuli</i>    | <i>Ca_Kabuli_denovo</i>      | 8882179                        | (C/T)       |
| 18952       | CakSNP18952    | <i>Kabuli</i>    | <i>Ca_Kabuli_denovo</i>      | 8882231                        | (G/A)       |

| <b>S.N.</b> | <b>SNP IDs</b> | <b>Cultivars</b> | <b>Chromosomes/scaffolds</b> | <b>Physical positions (bp)</b> | <b>SNPs</b> |
|-------------|----------------|------------------|------------------------------|--------------------------------|-------------|
| 18953       | CakSNP18953    | <i>Kabuli</i>    | <i>Ca_Kabuli_denovo</i>      | 8885140                        | (A/C)       |
| 18954       | CakSNP18954    | <i>Kabuli</i>    | <i>Ca_Kabuli_denovo</i>      | 8885204                        | (C/T)       |
| 18955       | CakSNP18955    | <i>Kabuli</i>    | <i>Ca_Kabuli_denovo</i>      | 8887438                        | (T/G)       |
| 18956       | CakSNP18956    | <i>Kabuli</i>    | <i>Ca_Kabuli_denovo</i>      | 8891101                        | (C/T)       |
| 18957       | CakSNP18957    | <i>Kabuli</i>    | <i>Ca_Kabuli_denovo</i>      | 8898477                        | (T/C)       |
| 18958       | CakSNP18958    | <i>Kabuli</i>    | <i>Ca_Kabuli_denovo</i>      | 8903642                        | (A/G)       |
| 18959       | CakSNP18959    | <i>Kabuli</i>    | <i>Ca_Kabuli_denovo</i>      | 8903702                        | (G/A)       |
| 18960       | CakSNP18960    | <i>Kabuli</i>    | <i>Ca_Kabuli_denovo</i>      | 8904259                        | (T/G)       |
| 18961       | CakSNP18961    | <i>Kabuli</i>    | <i>Ca_Kabuli_denovo</i>      | 8910990                        | (A/G)       |
| 18962       | CakSNP18962    | <i>Kabuli</i>    | <i>Ca_Kabuli_denovo</i>      | 8911135                        | (G/A)       |
| 18963       | CakSNP18963    | <i>Kabuli</i>    | <i>Ca_Kabuli_denovo</i>      | 8911140                        | (G/A)       |
| 18964       | CakSNP18964    | <i>Kabuli</i>    | <i>Ca_Kabuli_denovo</i>      | 8916332                        | (C/A)       |
| 18965       | CakSNP18965    | <i>Kabuli</i>    | <i>Ca_Kabuli_denovo</i>      | 8918015                        | (A/G)       |
| 18966       | CakSNP18966    | <i>Kabuli</i>    | <i>Ca_Kabuli_denovo</i>      | 8918028                        | (C/T)       |
| 18967       | CakSNP18967    | <i>Kabuli</i>    | <i>Ca_Kabuli_denovo</i>      | 8918993                        | (C/T)       |
| 18968       | CakSNP18968    | <i>Kabuli</i>    | <i>Ca_Kabuli_denovo</i>      | 8922620                        | (C/G)       |
| 18969       | CakSNP18969    | <i>Kabuli</i>    | <i>Ca_Kabuli_denovo</i>      | 8922642                        | (T/G)       |
| 18970       | CakSNP18970    | <i>Kabuli</i>    | <i>Ca_Kabuli_denovo</i>      | 8923604                        | (A/G)       |
| 18971       | CakSNP18971    | <i>Kabuli</i>    | <i>Ca_Kabuli_denovo</i>      | 8935945                        | (G/T)       |
| 18972       | CakSNP18972    | <i>Kabuli</i>    | <i>Ca_Kabuli_denovo</i>      | 8941714                        | (G/A)       |
| 18973       | CakSNP18973    | <i>Kabuli</i>    | <i>Ca_Kabuli_denovo</i>      | 8941759                        | (G/A)       |
| 18974       | CakSNP18974    | <i>Kabuli</i>    | <i>Ca_Kabuli_denovo</i>      | 8946705                        | (C/T)       |
| 18975       | CakSNP18975    | <i>Kabuli</i>    | <i>Ca_Kabuli_denovo</i>      | 8946759                        | (C/T)       |
| 18976       | CakSNP18976    | <i>Kabuli</i>    | <i>Ca_Kabuli_denovo</i>      | 8955101                        | (C/T)       |
| 18977       | CakSNP18977    | <i>Kabuli</i>    | <i>Ca_Kabuli_denovo</i>      | 8956392                        | (T/C)       |
| 18978       | CakSNP18978    | <i>Kabuli</i>    | <i>Ca_Kabuli_denovo</i>      | 8956416                        | (A/G)       |
| 18979       | CakSNP18979    | <i>Kabuli</i>    | <i>Ca_Kabuli_denovo</i>      | 8958868                        | (C/A)       |
| 18980       | CakSNP18980    | <i>Kabuli</i>    | <i>Ca_Kabuli_denovo</i>      | 8962549                        | (T/C)       |
| 18981       | CakSNP18981    | <i>Kabuli</i>    | <i>Ca_Kabuli_denovo</i>      | 8969882                        | (C/G)       |
| 18982       | CakSNP18982    | <i>Kabuli</i>    | <i>Ca_Kabuli_denovo</i>      | 8969927                        | (G/A)       |
| 18983       | CakSNP18983    | <i>Kabuli</i>    | <i>Ca_Kabuli_denovo</i>      | 8972239                        | (C/G)       |
| 18984       | CakSNP18984    | <i>Kabuli</i>    | <i>Ca_Kabuli_denovo</i>      | 8979187                        | (A/G)       |
| 18985       | CakSNP18985    | <i>Kabuli</i>    | <i>Ca_Kabuli_denovo</i>      | 8991933                        | (T/C)       |
| 18986       | CakSNP18986    | <i>Kabuli</i>    | <i>Ca_Kabuli_denovo</i>      | 8998274                        | (C/T)       |
| 18987       | CakSNP18987    | <i>Kabuli</i>    | <i>Ca_Kabuli_denovo</i>      | 8998283                        | (G/C)       |
| 18988       | CakSNP18988    | <i>Kabuli</i>    | <i>Ca_Kabuli_denovo</i>      | 8998729                        | (C/G)       |
| 18989       | CakSNP18989    | <i>Kabuli</i>    | <i>Ca_Kabuli_denovo</i>      | 8998743                        | (G/T)       |
| 18990       | CakSNP18990    | <i>Kabuli</i>    | <i>Ca_Kabuli_denovo</i>      | 8999684                        | (C/T)       |
| 18991       | CakSNP18991    | <i>Kabuli</i>    | <i>Ca_Kabuli_denovo</i>      | 8999695                        | (T/C)       |



| <b>S.N.</b> | <b>SNP IDs</b> | <b>Cultivars</b> | <b>Chromosomes/scaffolds</b> | <b>Physical positions (bp)</b> | <b>SNPs</b> |
|-------------|----------------|------------------|------------------------------|--------------------------------|-------------|
| 18992       | CakSNP18992    | <i>Kabuli</i>    | <i>Ca_Kabuli_denovo</i>      | 9007535                        | (C/A)       |
| 18993       | CakSNP18993    | <i>Kabuli</i>    | <i>Ca_Kabuli_denovo</i>      | 9007546                        | (A/C)       |
| 18994       | CakSNP18994    | <i>Kabuli</i>    | <i>Ca_Kabuli_denovo</i>      | 9008111                        | (G/A)       |
| 18995       | CakSNP18995    | <i>Kabuli</i>    | <i>Ca_Kabuli_denovo</i>      | 9008153                        | (A/G)       |
| 18996       | CakSNP18996    | <i>Kabuli</i>    | <i>Ca_Kabuli_denovo</i>      | 9009853                        | (T/G)       |
| 18997       | CakSNP18997    | <i>Kabuli</i>    | <i>Ca_Kabuli_denovo</i>      | 9010359                        | (T/C)       |
| 18998       | CakSNP18998    | <i>Kabuli</i>    | <i>Ca_Kabuli_denovo</i>      | 9016466                        | (A/C)       |
| 18999       | CakSNP18999    | <i>Kabuli</i>    | <i>Ca_Kabuli_denovo</i>      | 9016479                        | (C/T)       |
| 19000       | CakSNP19000    | <i>Kabuli</i>    | <i>Ca_Kabuli_denovo</i>      | 9020583                        | (C/G)       |
| 19001       | CakSNP19001    | <i>Kabuli</i>    | <i>Ca_Kabuli_denovo</i>      | 9020621                        | (A/G)       |
| 19002       | CakSNP19002    | <i>Kabuli</i>    | <i>Ca_Kabuli_denovo</i>      | 9020928                        | (A/G)       |
| 19003       | CakSNP19003    | <i>Kabuli</i>    | <i>Ca_Kabuli_denovo</i>      | 9021373                        | (C/T)       |
| 19004       | CakSNP19004    | <i>Kabuli</i>    | <i>Ca_Kabuli_denovo</i>      | 9025243                        | (C/A)       |
| 19005       | CakSNP19005    | <i>Kabuli</i>    | <i>Ca_Kabuli_denovo</i>      | 9025246                        | (G/C)       |
| 19006       | CakSNP19006    | <i>Kabuli</i>    | <i>Ca_Kabuli_denovo</i>      | 9026799                        | (A/C)       |
| 19007       | CakSNP19007    | <i>Kabuli</i>    | <i>Ca_Kabuli_denovo</i>      | 9028405                        | (C/G)       |
| 19008       | CakSNP19008    | <i>Kabuli</i>    | <i>Ca_Kabuli_denovo</i>      | 9029661                        | (C/T)       |
| 19009       | CakSNP19009    | <i>Kabuli</i>    | <i>Ca_Kabuli_denovo</i>      | 9030509                        | (T/C)       |
| 19010       | CakSNP19010    | <i>Kabuli</i>    | <i>Ca_Kabuli_denovo</i>      | 9034404                        | (A/G)       |
| 19011       | CakSNP19011    | <i>Kabuli</i>    | <i>Ca_Kabuli_denovo</i>      | 9034429                        | (A/C)       |
| 19012       | CakSNP19012    | <i>Kabuli</i>    | <i>Ca_Kabuli_denovo</i>      | 9043273                        | (C/G)       |
| 19013       | CakSNP19013    | <i>Kabuli</i>    | <i>Ca_Kabuli_denovo</i>      | 9043321                        | (C/T)       |
| 19014       | CakSNP19014    | <i>Kabuli</i>    | <i>Ca_Kabuli_denovo</i>      | 9050711                        | (C/G)       |
| 19015       | CakSNP19015    | <i>Kabuli</i>    | <i>Ca_Kabuli_denovo</i>      | 9050747                        | (G/A)       |
| 19016       | CakSNP19016    | <i>Kabuli</i>    | <i>Ca_Kabuli_denovo</i>      | 9056377                        | (A/G)       |
| 19017       | CakSNP19017    | <i>Kabuli</i>    | <i>Ca_Kabuli_denovo</i>      | 9067796                        | (A/G)       |
| 19018       | CakSNP19018    | <i>Kabuli</i>    | <i>Ca_Kabuli_denovo</i>      | 9067797                        | (A/G)       |
| 19019       | CakSNP19019    | <i>Kabuli</i>    | <i>Ca_Kabuli_denovo</i>      | 9068479                        | (A/G)       |
| 19020       | CakSNP19020    | <i>Kabuli</i>    | <i>Ca_Kabuli_denovo</i>      | 9071784                        | (G/A)       |
| 19021       | CakSNP19021    | <i>Kabuli</i>    | <i>Ca_Kabuli_denovo</i>      | 9077263                        | (A/C)       |
| 19022       | CakSNP19022    | <i>Kabuli</i>    | <i>Ca_Kabuli_denovo</i>      | 9077474                        | (T/G)       |
| 19023       | CakSNP19023    | <i>Kabuli</i>    | <i>Ca_Kabuli_denovo</i>      | 9077488                        | (T/C)       |
| 19024       | CakSNP19024    | <i>Kabuli</i>    | <i>Ca_Kabuli_denovo</i>      | 9077513                        | (T/G)       |
| 19025       | CakSNP19025    | <i>Kabuli</i>    | <i>Ca_Kabuli_denovo</i>      | 9077529                        | (T/G)       |
| 19026       | CakSNP19026    | <i>Kabuli</i>    | <i>Ca_Kabuli_denovo</i>      | 9077813                        | (C/T)       |
| 19027       | CakSNP19027    | <i>Kabuli</i>    | <i>Ca_Kabuli_denovo</i>      | 9081380                        | (G/A)       |
| 19028       | CakSNP19028    | <i>Kabuli</i>    | <i>Ca_Kabuli_denovo</i>      | 9081383                        | (C/T)       |
| 19029       | CakSNP19029    | <i>Kabuli</i>    | <i>Ca_Kabuli_denovo</i>      | 9085000                        | (T/C)       |
| 19030       | CakSNP19030    | <i>Kabuli</i>    | <i>Ca_Kabuli_denovo</i>      | 9085051                        | (T/C)       |

| <b>S.N.</b> | <b>SNP IDs</b> | <b>Cultivars</b> | <b>Chromosomes/scaffolds</b> | <b>Physical positions (bp)</b> | <b>SNPs</b> |
|-------------|----------------|------------------|------------------------------|--------------------------------|-------------|
| 19031       | CakSNP19031    | <i>Kabuli</i>    | <i>Ca_Kabuli_denovo</i>      | 9087707                        | (T/C)       |
| 19032       | CakSNP19032    | <i>Kabuli</i>    | <i>Ca_Kabuli_denovo</i>      | 9089170                        | (A/C)       |
| 19033       | CakSNP19033    | <i>Kabuli</i>    | <i>Ca_Kabuli_denovo</i>      | 9089960                        | (G/A)       |
| 19034       | CakSNP19034    | <i>Kabuli</i>    | <i>Ca_Kabuli_denovo</i>      | 9093663                        | (G/A)       |
| 19035       | CakSNP19035    | <i>Kabuli</i>    | <i>Ca_Kabuli_denovo</i>      | 9094477                        | (C/T)       |
| 19036       | CakSNP19036    | <i>Kabuli</i>    | <i>Ca_Kabuli_denovo</i>      | 9096275                        | (G/A)       |
| 19037       | CakSNP19037    | <i>Kabuli</i>    | <i>Ca_Kabuli_denovo</i>      | 9096314                        | (A/G)       |
| 19038       | CakSNP19038    | <i>Kabuli</i>    | <i>Ca_Kabuli_denovo</i>      | 9099899                        | (G/C)       |
| 19039       | CakSNP19039    | <i>Kabuli</i>    | <i>Ca_Kabuli_denovo</i>      | 9099908                        | (C/G)       |
| 19040       | CakSNP19040    | <i>Kabuli</i>    | <i>Ca_Kabuli_denovo</i>      | 9101826                        | (A/G)       |
| 19041       | CakSNP19041    | <i>Kabuli</i>    | <i>Ca_Kabuli_denovo</i>      | 9110057                        | (T/G)       |
| 19042       | CakSNP19042    | <i>Kabuli</i>    | <i>Ca_Kabuli_denovo</i>      | 9116771                        | (G/A)       |
| 19043       | CakSNP19043    | <i>Kabuli</i>    | <i>Ca_Kabuli_denovo</i>      | 9116864                        | (C/T)       |
| 19044       | CakSNP19044    | <i>Kabuli</i>    | <i>Ca_Kabuli_denovo</i>      | 9116876                        | (C/G)       |
| 19045       | CakSNP19045    | <i>Kabuli</i>    | <i>Ca_Kabuli_denovo</i>      | 9118126                        | (A/G)       |
| 19046       | CakSNP19046    | <i>Kabuli</i>    | <i>Ca_Kabuli_denovo</i>      | 9119868                        | (A/C)       |
| 19047       | CakSNP19047    | <i>Kabuli</i>    | <i>Ca_Kabuli_denovo</i>      | 9119949                        | (G/A)       |
| 19048       | CakSNP19048    | <i>Kabuli</i>    | <i>Ca_Kabuli_denovo</i>      | 9120924                        | (C/T)       |
| 19049       | CakSNP19049    | <i>Kabuli</i>    | <i>Ca_Kabuli_denovo</i>      | 9120942                        | (C/G)       |
| 19050       | CakSNP19050    | <i>Kabuli</i>    | <i>Ca_Kabuli_denovo</i>      | 9124892                        | (A/G)       |
| 19051       | CakSNP19051    | <i>Kabuli</i>    | <i>Ca_Kabuli_denovo</i>      | 9124895                        | (G/T)       |
| 19052       | CakSNP19052    | <i>Kabuli</i>    | <i>Ca_Kabuli_denovo</i>      | 9125565                        | (C/T)       |
| 19053       | CakSNP19053    | <i>Kabuli</i>    | <i>Ca_Kabuli_denovo</i>      | 9128353                        | (A/G)       |
| 19054       | CakSNP19054    | <i>Kabuli</i>    | <i>Ca_Kabuli_denovo</i>      | 9128371                        | (C/T)       |
| 19055       | CakSNP19055    | <i>Kabuli</i>    | <i>Ca_Kabuli_denovo</i>      | 9130620                        | (G/T)       |
| 19056       | CakSNP19056    | <i>Kabuli</i>    | <i>Ca_Kabuli_denovo</i>      | 9140141                        | (G/A)       |
| 19057       | CakSNP19057    | <i>Kabuli</i>    | <i>Ca_Kabuli_denovo</i>      | 9140451                        | (G/C)       |
| 19058       | CakSNP19058    | <i>Kabuli</i>    | <i>Ca_Kabuli_denovo</i>      | 9140463                        | (A/G)       |
| 19059       | CakSNP19059    | <i>Kabuli</i>    | <i>Ca_Kabuli_denovo</i>      | 9142027                        | (T/C)       |
| 19060       | CakSNP19060    | <i>Kabuli</i>    | <i>Ca_Kabuli_denovo</i>      | 9147040                        | (G/C)       |
| 19061       | CakSNP19061    | <i>Kabuli</i>    | <i>Ca_Kabuli_denovo</i>      | 9147082                        | (G/C)       |
| 19062       | CakSNP19062    | <i>Kabuli</i>    | <i>Ca_Kabuli_denovo</i>      | 9148606                        | (G/C)       |
| 19063       | CakSNP19063    | <i>Kabuli</i>    | <i>Ca_Kabuli_denovo</i>      | 9150620                        | (G/C)       |
| 19064       | CakSNP19064    | <i>Kabuli</i>    | <i>Ca_Kabuli_denovo</i>      | 9156588                        | (G/T)       |
| 19065       | CakSNP19065    | <i>Kabuli</i>    | <i>Ca_Kabuli_denovo</i>      | 9156594                        | (C/T)       |
| 19066       | CakSNP19066    | <i>Kabuli</i>    | <i>Ca_Kabuli_denovo</i>      | 9158920                        | (T/G)       |
| 19067       | CakSNP19067    | <i>Kabuli</i>    | <i>Ca_Kabuli_denovo</i>      | 9160264                        | (G/C)       |
| 19068       | CakSNP19068    | <i>Kabuli</i>    | <i>Ca_Kabuli_denovo</i>      | 9160267                        | (T/G)       |
| 19069       | CakSNP19069    | <i>Kabuli</i>    | <i>Ca_Kabuli_denovo</i>      | 9172662                        | (A/C)       |

| <b>S.N.</b> | <b>SNP IDs</b> | <b>Cultivars</b> | <b>Chromosomes/scaffolds</b> | <b>Physical positions (bp)</b> | <b>SNPs</b> |
|-------------|----------------|------------------|------------------------------|--------------------------------|-------------|
| 19070       | CakSNP19070    | <i>Kabuli</i>    | <i>Ca_Kabuli_denovo</i>      | 9173737                        | (C/T)       |
| 19071       | CakSNP19071    | <i>Kabuli</i>    | <i>Ca_Kabuli_denovo</i>      | 9173759                        | (C/A)       |
| 19072       | CakSNP19072    | <i>Kabuli</i>    | <i>Ca_Kabuli_denovo</i>      | 9176774                        | (A/C)       |
| 19073       | CakSNP19073    | <i>Kabuli</i>    | <i>Ca_Kabuli_denovo</i>      | 9176776                        | (A/G)       |
| 19074       | CakSNP19074    | <i>Kabuli</i>    | <i>Ca_Kabuli_denovo</i>      | 9177251                        | (T/G)       |
| 19075       | CakSNP19075    | <i>Kabuli</i>    | <i>Ca_Kabuli_denovo</i>      | 9177255                        | (A/C)       |
| 19076       | CakSNP19076    | <i>Kabuli</i>    | <i>Ca_Kabuli_denovo</i>      | 9185606                        | (A/C)       |
| 19077       | CakSNP19077    | <i>Kabuli</i>    | <i>Ca_Kabuli_denovo</i>      | 9185607                        | (G/C)       |
| 19078       | CakSNP19078    | <i>Kabuli</i>    | <i>Ca_Kabuli_denovo</i>      | 9185932                        | (C/T)       |
| 19079       | CakSNP19079    | <i>Kabuli</i>    | <i>Ca_Kabuli_denovo</i>      | 9187737                        | (T/G)       |
| 19080       | CakSNP19080    | <i>Kabuli</i>    | <i>Ca_Kabuli_denovo</i>      | 9192222                        | (G/A)       |
| 19081       | CakSNP19081    | <i>Kabuli</i>    | <i>Ca_Kabuli_denovo</i>      | 9192798                        | (G/A)       |
| 19082       | CakSNP19082    | <i>Kabuli</i>    | <i>Ca_Kabuli_denovo</i>      | 9192851                        | (T/C)       |
| 19083       | CakSNP19083    | <i>Kabuli</i>    | <i>Ca_Kabuli_denovo</i>      | 9198550                        | (A/G)       |
| 19084       | CakSNP19084    | <i>Kabuli</i>    | <i>Ca_Kabuli_denovo</i>      | 9198616                        | (C/G)       |
| 19085       | CakSNP19085    | <i>Kabuli</i>    | <i>Ca_Kabuli_denovo</i>      | 9201182                        | (T/C)       |
| 19086       | CakSNP19086    | <i>Kabuli</i>    | <i>Ca_Kabuli_denovo</i>      | 9203603                        | (T/C)       |
| 19087       | CakSNP19087    | <i>Kabuli</i>    | <i>Ca_Kabuli_denovo</i>      | 9205951                        | (A/G)       |
| 19088       | CakSNP19088    | <i>Kabuli</i>    | <i>Ca_Kabuli_denovo</i>      | 9208178                        | (C/A)       |
| 19089       | CakSNP19089    | <i>Kabuli</i>    | <i>Ca_Kabuli_denovo</i>      | 9208179                        | (A/G)       |
| 19090       | CakSNP19090    | <i>Kabuli</i>    | <i>Ca_Kabuli_denovo</i>      | 9209336                        | (T/G)       |
| 19091       | CakSNP19091    | <i>Kabuli</i>    | <i>Ca_Kabuli_denovo</i>      | 9214280                        | (G/C)       |
| 19092       | CakSNP19092    | <i>Kabuli</i>    | <i>Ca_Kabuli_denovo</i>      | 9224701                        | (A/G)       |
| 19093       | CakSNP19093    | <i>Kabuli</i>    | <i>Ca_Kabuli_denovo</i>      | 9224756                        | (A/G)       |
| 19094       | CakSNP19094    | <i>Kabuli</i>    | <i>Ca_Kabuli_denovo</i>      | 9226486                        | (T/C)       |
| 19095       | CakSNP19095    | <i>Kabuli</i>    | <i>Ca_Kabuli_denovo</i>      | 9239246                        | (T/C)       |
| 19096       | CakSNP19096    | <i>Kabuli</i>    | <i>Ca_Kabuli_denovo</i>      | 9239264                        | (A/G)       |
| 19097       | CakSNP19097    | <i>Kabuli</i>    | <i>Ca_Kabuli_denovo</i>      | 9239699                        | (G/A)       |
| 19098       | CakSNP19098    | <i>Kabuli</i>    | <i>Ca_Kabuli_denovo</i>      | 9239708                        | (G/A)       |
| 19099       | CakSNP19099    | <i>Kabuli</i>    | <i>Ca_Kabuli_denovo</i>      | 9248504                        | (T/C)       |
| 19100       | CakSNP19100    | <i>Kabuli</i>    | <i>Ca_Kabuli_denovo</i>      | 9248531                        | (C/G)       |
| 19101       | CakSNP19101    | <i>Kabuli</i>    | <i>Ca_Kabuli_denovo</i>      | 9250624                        | (A/G)       |
| 19102       | CakSNP19102    | <i>Kabuli</i>    | <i>Ca_Kabuli_denovo</i>      | 9251558                        | (C/G)       |
| 19103       | CakSNP19103    | <i>Kabuli</i>    | <i>Ca_Kabuli_denovo</i>      | 9252627                        | (C/T)       |
| 19104       | CakSNP19104    | <i>Kabuli</i>    | <i>Ca_Kabuli_denovo</i>      | 9260377                        | (A/G)       |
| 19105       | CakSNP19105    | <i>Kabuli</i>    | <i>Ca_Kabuli_denovo</i>      | 9275027                        | (C/T)       |
| 19106       | CakSNP19106    | <i>Kabuli</i>    | <i>Ca_Kabuli_denovo</i>      | 9279086                        | (G/A)       |
| 19107       | CakSNP19107    | <i>Kabuli</i>    | <i>Ca_Kabuli_denovo</i>      | 9279103                        | (C/G)       |
| 19108       | CakSNP19108    | <i>Kabuli</i>    | <i>Ca_Kabuli_denovo</i>      | 9280476                        | (G/T)       |

| <b>S.N.</b> | <b>SNP IDs</b> | <b>Cultivars</b> | <b>Chromosomes/scaffolds</b> | <b>Physical positions (bp)</b> | <b>SNPs</b> |
|-------------|----------------|------------------|------------------------------|--------------------------------|-------------|
| 19109       | CakSNP19109    | <i>Kabuli</i>    | <i>Ca_Kabuli_denovo</i>      | 9285521                        | (A/G)       |
| 19110       | CakSNP19110    | <i>Kabuli</i>    | <i>Ca_Kabuli_denovo</i>      | 9285552                        | (A/C)       |
| 19111       | CakSNP19111    | <i>Kabuli</i>    | <i>Ca_Kabuli_denovo</i>      | 9290097                        | (C/T)       |
| 19112       | CakSNP19112    | <i>Kabuli</i>    | <i>Ca_Kabuli_denovo</i>      | 9290124                        | (T/C)       |
| 19113       | CakSNP19113    | <i>Kabuli</i>    | <i>Ca_Kabuli_denovo</i>      | 9291022                        | (T/C)       |
| 19114       | CakSNP19114    | <i>Kabuli</i>    | <i>Ca_Kabuli_denovo</i>      | 9291386                        | (G/T)       |
| 19115       | CakSNP19115    | <i>Kabuli</i>    | <i>Ca_Kabuli_denovo</i>      | 9295107                        | (C/T)       |
| 19116       | CakSNP19116    | <i>Kabuli</i>    | <i>Ca_Kabuli_denovo</i>      | 9302031                        | (A/G)       |
| 19117       | CakSNP19117    | <i>Kabuli</i>    | <i>Ca_Kabuli_denovo</i>      | 9303206                        | (G/C)       |
| 19118       | CakSNP19118    | <i>Kabuli</i>    | <i>Ca_Kabuli_denovo</i>      | 9303255                        | (G/A)       |
| 19119       | CakSNP19119    | <i>Kabuli</i>    | <i>Ca_Kabuli_denovo</i>      | 9306274                        | (T/C)       |
| 19120       | CakSNP19120    | <i>Kabuli</i>    | <i>Ca_Kabuli_denovo</i>      | 9311223                        | (T/C)       |
| 19121       | CakSNP19121    | <i>Kabuli</i>    | <i>Ca_Kabuli_denovo</i>      | 9311232                        | (T/C)       |
| 19122       | CakSNP19122    | <i>Kabuli</i>    | <i>Ca_Kabuli_denovo</i>      | 9313124                        | (G/A)       |
| 19123       | CakSNP19123    | <i>Kabuli</i>    | <i>Ca_Kabuli_denovo</i>      | 9313760                        | (A/C)       |
| 19124       | CakSNP19124    | <i>Kabuli</i>    | <i>Ca_Kabuli_denovo</i>      | 9313761                        | (G/C)       |
| 19125       | CakSNP19125    | <i>Kabuli</i>    | <i>Ca_Kabuli_denovo</i>      | 9313763                        | (T/A)       |
| 19126       | CakSNP19126    | <i>Kabuli</i>    | <i>Ca_Kabuli_denovo</i>      | 9313764                        | (C/T)       |
| 19127       | CakSNP19127    | <i>Kabuli</i>    | <i>Ca_Kabuli_denovo</i>      | 9323010                        | (A/G)       |
| 19128       | CakSNP19128    | <i>Kabuli</i>    | <i>Ca_Kabuli_denovo</i>      | 9325321                        | (G/A)       |
| 19129       | CakSNP19129    | <i>Kabuli</i>    | <i>Ca_Kabuli_denovo</i>      | 9326340                        | (C/G)       |
| 19130       | CakSNP19130    | <i>Kabuli</i>    | <i>Ca_Kabuli_denovo</i>      | 9326358                        | (C/T)       |
| 19131       | CakSNP19131    | <i>Kabuli</i>    | <i>Ca_Kabuli_denovo</i>      | 9327287                        | (G/A)       |
| 19132       | CakSNP19132    | <i>Kabuli</i>    | <i>Ca_Kabuli_denovo</i>      | 9329987                        | (A/G)       |
| 19133       | CakSNP19133    | <i>Kabuli</i>    | <i>Ca_Kabuli_denovo</i>      | 9331268                        | (T/A)       |
| 19134       | CakSNP19134    | <i>Kabuli</i>    | <i>Ca_Kabuli_denovo</i>      | 9331322                        | (G/A)       |
| 19135       | CakSNP19135    | <i>Kabuli</i>    | <i>Ca_Kabuli_denovo</i>      | 9336282                        | (C/T)       |
| 19136       | CakSNP19136    | <i>Kabuli</i>    | <i>Ca_Kabuli_denovo</i>      | 9336314                        | (A/G)       |
| 19137       | CakSNP19137    | <i>Kabuli</i>    | <i>Ca_Kabuli_denovo</i>      | 9337079                        | (A/G)       |
| 19138       | CakSNP19138    | <i>Kabuli</i>    | <i>Ca_Kabuli_denovo</i>      | 9337886                        | (G/A)       |
| 19139       | CakSNP19139    | <i>Kabuli</i>    | <i>Ca_Kabuli_denovo</i>      | 9337907                        | (G/A)       |
| 19140       | CakSNP19140    | <i>Kabuli</i>    | <i>Ca_Kabuli_denovo</i>      | 9341919                        | (G/A)       |
| 19141       | CakSNP19141    | <i>Kabuli</i>    | <i>Ca_Kabuli_denovo</i>      | 9343441                        | (C/T)       |
| 19142       | CakSNP19142    | <i>Kabuli</i>    | <i>Ca_Kabuli_denovo</i>      | 9343510                        | (A/C)       |
| 19143       | CakSNP19143    | <i>Kabuli</i>    | <i>Ca_Kabuli_denovo</i>      | 9343631                        | (G/A)       |
| 19144       | CakSNP19144    | <i>Kabuli</i>    | <i>Ca_Kabuli_denovo</i>      | 9349136                        | (G/A)       |
| 19145       | CakSNP19145    | <i>Kabuli</i>    | <i>Ca_Kabuli_denovo</i>      | 9349164                        | (C/T)       |
| 19146       | CakSNP19146    | <i>Kabuli</i>    | <i>Ca_Kabuli_denovo</i>      | 9360445                        | (T/C)       |
| 19147       | CakSNP19147    | <i>Kabuli</i>    | <i>Ca_Kabuli_denovo</i>      | 9360845                        | (C/G)       |

| <b>S.N.</b> | <b>SNP IDs</b> | <b>Cultivars</b> | <b>Chromosomes/scaffolds</b> | <b>Physical positions (bp)</b> | <b>SNPs</b> |
|-------------|----------------|------------------|------------------------------|--------------------------------|-------------|
| 19148       | CakSNP19148    | <i>Kabuli</i>    | <i>Ca_Kabuli_denovo</i>      | 9361697                        | (A/G)       |
| 19149       | CakSNP19149    | <i>Kabuli</i>    | <i>Ca_Kabuli_denovo</i>      | 9362542                        | (T/G)       |
| 19150       | CakSNP19150    | <i>Kabuli</i>    | <i>Ca_Kabuli_denovo</i>      | 9364583                        | (A/G)       |
| 19151       | CakSNP19151    | <i>Kabuli</i>    | <i>Ca_Kabuli_denovo</i>      | 9364589                        | (C/G)       |
| 19152       | CakSNP19152    | <i>Kabuli</i>    | <i>Ca_Kabuli_denovo</i>      | 9370733                        | (A/C)       |
| 19153       | CakSNP19153    | <i>Kabuli</i>    | <i>Ca_Kabuli_denovo</i>      | 9373782                        | (A/G)       |
| 19154       | CakSNP19154    | <i>Kabuli</i>    | <i>Ca_Kabuli_denovo</i>      | 9378726                        | (T/C)       |
| 19155       | CakSNP19155    | <i>Kabuli</i>    | <i>Ca_Kabuli_denovo</i>      | 9380666                        | (A/G)       |
| 19156       | CakSNP19156    | <i>Kabuli</i>    | <i>Ca_Kabuli_denovo</i>      | 9380693                        | (T/C)       |
| 19157       | CakSNP19157    | <i>Kabuli</i>    | <i>Ca_Kabuli_denovo</i>      | 9383066                        | (T/C)       |
| 19158       | CakSNP19158    | <i>Kabuli</i>    | <i>Ca_Kabuli_denovo</i>      | 9386351                        | (T/C)       |
| 19159       | CakSNP19159    | <i>Kabuli</i>    | <i>Ca_Kabuli_denovo</i>      | 9389346                        | (C/T)       |
| 19160       | CakSNP19160    | <i>Kabuli</i>    | <i>Ca_Kabuli_denovo</i>      | 9393532                        | (C/T)       |
| 19161       | CakSNP19161    | <i>Kabuli</i>    | <i>Ca_Kabuli_denovo</i>      | 9394058                        | (G/A)       |
| 19162       | CakSNP19162    | <i>Kabuli</i>    | <i>Ca_Kabuli_denovo</i>      | 9395983                        | (G/T)       |
| 19163       | CakSNP19163    | <i>Kabuli</i>    | <i>Ca_Kabuli_denovo</i>      | 9396052                        | (G/A)       |
| 19164       | CakSNP19164    | <i>Kabuli</i>    | <i>Ca_Kabuli_denovo</i>      | 9396286                        | (T/C)       |
| 19165       | CakSNP19165    | <i>Kabuli</i>    | <i>Ca_Kabuli_denovo</i>      | 9396295                        | (T/C)       |
| 19166       | CakSNP19166    | <i>Kabuli</i>    | <i>Ca_Kabuli_denovo</i>      | 9397435                        | (C/T)       |
| 19167       | CakSNP19167    | <i>Kabuli</i>    | <i>Ca_Kabuli_denovo</i>      | 9397440                        | (T/A)       |
| 19168       | CakSNP19168    | <i>Kabuli</i>    | <i>Ca_Kabuli_denovo</i>      | 9404461                        | (G/A)       |
| 19169       | CakSNP19169    | <i>Kabuli</i>    | <i>Ca_Kabuli_denovo</i>      | 9404509                        | (T/C)       |
| 19170       | CakSNP19170    | <i>Kabuli</i>    | <i>Ca_Kabuli_denovo</i>      | 9410160                        | (A/G)       |
| 19171       | CakSNP19171    | <i>Kabuli</i>    | <i>Ca_Kabuli_denovo</i>      | 9412751                        | (G/C)       |
| 19172       | CakSNP19172    | <i>Kabuli</i>    | <i>Ca_Kabuli_denovo</i>      | 9412760                        | (A/G)       |
| 19173       | CakSNP19173    | <i>Kabuli</i>    | <i>Ca_Kabuli_denovo</i>      | 9414379                        | (T/G)       |
| 19174       | CakSNP19174    | <i>Kabuli</i>    | <i>Ca_Kabuli_denovo</i>      | 9415076                        | (A/G)       |
| 19175       | CakSNP19175    | <i>Kabuli</i>    | <i>Ca_Kabuli_denovo</i>      | 9415133                        | (G/A)       |
| 19176       | CakSNP19176    | <i>Kabuli</i>    | <i>Ca_Kabuli_denovo</i>      | 9418681                        | (T/A)       |
| 19177       | CakSNP19177    | <i>Kabuli</i>    | <i>Ca_Kabuli_denovo</i>      | 9421464                        | (A/C)       |
| 19178       | CakSNP19178    | <i>Kabuli</i>    | <i>Ca_Kabuli_denovo</i>      | 9421521                        | (T/C)       |
| 19179       | CakSNP19179    | <i>Kabuli</i>    | <i>Ca_Kabuli_denovo</i>      | 9425870                        | (T/C)       |
| 19180       | CakSNP19180    | <i>Kabuli</i>    | <i>Ca_Kabuli_denovo</i>      | 9429363                        | (A/C)       |
| 19181       | CakSNP19181    | <i>Kabuli</i>    | <i>Ca_Kabuli_denovo</i>      | 9432400                        | (T/C)       |
| 19182       | CakSNP19182    | <i>Kabuli</i>    | <i>Ca_Kabuli_denovo</i>      | 9434348                        | (T/C)       |
| 19183       | CakSNP19183    | <i>Kabuli</i>    | <i>Ca_Kabuli_denovo</i>      | 9434372                        | (T/G)       |
| 19184       | CakSNP19184    | <i>Kabuli</i>    | <i>Ca_Kabuli_denovo</i>      | 9435488                        | (T/G)       |
| 19185       | CakSNP19185    | <i>Kabuli</i>    | <i>Ca_Kabuli_denovo</i>      | 9437375                        | (A/G)       |
| 19186       | CakSNP19186    | <i>Kabuli</i>    | <i>Ca_Kabuli_denovo</i>      | 9437396                        | (C/G)       |

| <b>S.N.</b> | <b>SNP IDs</b> | <b>Cultivars</b> | <b>Chromosomes/scaffolds</b> | <b>Physical positions (bp)</b> | <b>SNPs</b> |
|-------------|----------------|------------------|------------------------------|--------------------------------|-------------|
| 19187       | CakSNP19187    | <i>Kabuli</i>    | <i>Ca_Kabuli_denovo</i>      | 9437960                        | (C/T)       |
| 19188       | CakSNP19188    | <i>Kabuli</i>    | <i>Ca_Kabuli_denovo</i>      | 9437977                        | (A/G)       |
| 19189       | CakSNP19189    | <i>Kabuli</i>    | <i>Ca_Kabuli_denovo</i>      | 9438865                        | (G/C)       |
| 19190       | CakSNP19190    | <i>Kabuli</i>    | <i>Ca_Kabuli_denovo</i>      | 9442353                        | (G/C)       |
| 19191       | CakSNP19191    | <i>Kabuli</i>    | <i>Ca_Kabuli_denovo</i>      | 9442362                        | (A/G)       |
| 19192       | CakSNP19192    | <i>Kabuli</i>    | <i>Ca_Kabuli_denovo</i>      | 9444085                        | (T/C)       |
| 19193       | CakSNP19193    | <i>Kabuli</i>    | <i>Ca_Kabuli_denovo</i>      | 9448354                        | (G/T)       |
| 19194       | CakSNP19194    | <i>Kabuli</i>    | <i>Ca_Kabuli_denovo</i>      | 9452904                        | (G/A)       |
| 19195       | CakSNP19195    | <i>Kabuli</i>    | <i>Ca_Kabuli_denovo</i>      | 9456475                        | (T/C)       |
| 19196       | CakSNP19196    | <i>Kabuli</i>    | <i>Ca_Kabuli_denovo</i>      | 9456505                        | (T/G)       |
| 19197       | CakSNP19197    | <i>Kabuli</i>    | <i>Ca_Kabuli_denovo</i>      | 9457401                        | (G/C)       |
| 19198       | CakSNP19198    | <i>Kabuli</i>    | <i>Ca_Kabuli_denovo</i>      | 9462647                        | (A/G)       |
| 19199       | CakSNP19199    | <i>Kabuli</i>    | <i>Ca_Kabuli_denovo</i>      | 9462650                        | (C/G)       |
| 19200       | CakSNP19200    | <i>Kabuli</i>    | <i>Ca_Kabuli_denovo</i>      | 9469427                        | (G/C)       |
| 19201       | CakSNP19201    | <i>Kabuli</i>    | <i>Ca_Kabuli_denovo</i>      | 9475012                        | (A/G)       |
| 19202       | CakSNP19202    | <i>Kabuli</i>    | <i>Ca_Kabuli_denovo</i>      | 9479197                        | (G/C)       |
| 19203       | CakSNP19203    | <i>Kabuli</i>    | <i>Ca_Kabuli_denovo</i>      | 9479611                        | (A/T)       |
| 19204       | CakSNP19204    | <i>Kabuli</i>    | <i>Ca_Kabuli_denovo</i>      | 9482483                        | (T/C)       |
| 19205       | CakSNP19205    | <i>Kabuli</i>    | <i>Ca_Kabuli_denovo</i>      | 9493569                        | (T/G)       |
| 19206       | CakSNP19206    | <i>Kabuli</i>    | <i>Ca_Kabuli_denovo</i>      | 9493584                        | (T/G)       |
| 19207       | CakSNP19207    | <i>Kabuli</i>    | <i>Ca_Kabuli_denovo</i>      | 9495891                        | (C/G)       |
| 19208       | CakSNP19208    | <i>Kabuli</i>    | <i>Ca_Kabuli_denovo</i>      | 9495933                        | (T/G)       |
| 19209       | CakSNP19209    | <i>Kabuli</i>    | <i>Ca_Kabuli_denovo</i>      | 9501269                        | (T/C)       |
| 19210       | CakSNP19210    | <i>Kabuli</i>    | <i>Ca_Kabuli_denovo</i>      | 9503039                        | (G/T)       |
| 19211       | CakSNP19211    | <i>Kabuli</i>    | <i>Ca_Kabuli_denovo</i>      | 9510912                        | (A/G)       |
| 19212       | CakSNP19212    | <i>Kabuli</i>    | <i>Ca_Kabuli_denovo</i>      | 9511963                        | (C/T)       |
| 19213       | CakSNP19213    | <i>Kabuli</i>    | <i>Ca_Kabuli_denovo</i>      | 9511976                        | (G/A)       |
| 19214       | CakSNP19214    | <i>Kabuli</i>    | <i>Ca_Kabuli_denovo</i>      | 9513069                        | (C/T)       |
| 19215       | CakSNP19215    | <i>Kabuli</i>    | <i>Ca_Kabuli_denovo</i>      | 9513373                        | (T/C)       |
| 19216       | CakSNP19216    | <i>Kabuli</i>    | <i>Ca_Kabuli_denovo</i>      | 9513845                        | (G/A)       |
| 19217       | CakSNP19217    | <i>Kabuli</i>    | <i>Ca_Kabuli_denovo</i>      | 9518015                        | (G/A)       |
| 19218       | CakSNP19218    | <i>Kabuli</i>    | <i>Ca_Kabuli_denovo</i>      | 9519581                        | (C/T)       |
| 19219       | CakSNP19219    | <i>Kabuli</i>    | <i>Ca_Kabuli_denovo</i>      | 9519617                        | (C/T)       |
| 19220       | CakSNP19220    | <i>Kabuli</i>    | <i>Ca_Kabuli_denovo</i>      | 9519815                        | (A/G)       |
| 19221       | CakSNP19221    | <i>Kabuli</i>    | <i>Ca_Kabuli_denovo</i>      | 9519824                        | (A/G)       |
| 19222       | CakSNP19222    | <i>Kabuli</i>    | <i>Ca_Kabuli_denovo</i>      | 9522876                        | (C/G)       |
| 19223       | CakSNP19223    | <i>Kabuli</i>    | <i>Ca_Kabuli_denovo</i>      | 9523870                        | (C/G)       |
| 19224       | CakSNP19224    | <i>Kabuli</i>    | <i>Ca_Kabuli_denovo</i>      | 9523885                        | (C/T)       |
| 19225       | CakSNP19225    | <i>Kabuli</i>    | <i>Ca_Kabuli_denovo</i>      | 9523894                        | (C/A)       |

| <b>S.N.</b> | <b>SNP IDs</b> | <b>Cultivars</b> | <b>Chromosomes/scaffolds</b> | <b>Physical positions (bp)</b> | <b>SNPs</b> |
|-------------|----------------|------------------|------------------------------|--------------------------------|-------------|
| 19226       | CakSNP19226    | <i>Kabuli</i>    | <i>Ca_Kabuli_denovo</i>      | 9524048                        | (A/G)       |
| 19227       | CakSNP19227    | <i>Kabuli</i>    | <i>Ca_Kabuli_denovo</i>      | 9527559                        | (T/A)       |
| 19228       | CakSNP19228    | <i>Kabuli</i>    | <i>Ca_Kabuli_denovo</i>      | 9533107                        | (C/T)       |
| 19229       | CakSNP19229    | <i>Kabuli</i>    | <i>Ca_Kabuli_denovo</i>      | 9533143                        | (C/T)       |
| 19230       | CakSNP19230    | <i>Kabuli</i>    | <i>Ca_Kabuli_denovo</i>      | 9533629                        | (G/A)       |
| 19231       | CakSNP19231    | <i>Kabuli</i>    | <i>Ca_Kabuli_denovo</i>      | 9533635                        | (A/G)       |
| 19232       | CakSNP19232    | <i>Kabuli</i>    | <i>Ca_Kabuli_denovo</i>      | 9533903                        | (G/C)       |
| 19233       | CakSNP19233    | <i>Kabuli</i>    | <i>Ca_Kabuli_denovo</i>      | 9533953                        | (G/T)       |
| 19234       | CakSNP19234    | <i>Kabuli</i>    | <i>Ca_Kabuli_denovo</i>      | 9535405                        | (A/C)       |
| 19235       | CakSNP19235    | <i>Kabuli</i>    | <i>Ca_Kabuli_denovo</i>      | 9535430                        | (A/C)       |
| 19236       | CakSNP19236    | <i>Kabuli</i>    | <i>Ca_Kabuli_denovo</i>      | 9545146                        | (T/G)       |
| 19237       | CakSNP19237    | <i>Kabuli</i>    | <i>Ca_Kabuli_denovo</i>      | 9545486                        | (A/T)       |
| 19238       | CakSNP19238    | <i>Kabuli</i>    | <i>Ca_Kabuli_denovo</i>      | 9551035                        | (G/C)       |
| 19239       | CakSNP19239    | <i>Kabuli</i>    | <i>Ca_Kabuli_denovo</i>      | 9554120                        | (A/G)       |
| 19240       | CakSNP19240    | <i>Kabuli</i>    | <i>Ca_Kabuli_denovo</i>      | 9555017                        | (C/T)       |
| 19241       | CakSNP19241    | <i>Kabuli</i>    | <i>Ca_Kabuli_denovo</i>      | 9555080                        | (T/C)       |
| 19242       | CakSNP19242    | <i>Kabuli</i>    | <i>Ca_Kabuli_denovo</i>      | 9565532                        | (C/T)       |
| 19243       | CakSNP19243    | <i>Kabuli</i>    | <i>Ca_Kabuli_denovo</i>      | 9565561                        | (T/G)       |
| 19244       | CakSNP19244    | <i>Kabuli</i>    | <i>Ca_Kabuli_denovo</i>      | 9573858                        | (T/C)       |
| 19245       | CakSNP19245    | <i>Kabuli</i>    | <i>Ca_Kabuli_denovo</i>      | 9585179                        | (T/C)       |
| 19246       | CakSNP19246    | <i>Kabuli</i>    | <i>Ca_Kabuli_denovo</i>      | 9586184                        | (G/C)       |
| 19247       | CakSNP19247    | <i>Kabuli</i>    | <i>Ca_Kabuli_denovo</i>      | 9595407                        | (C/G)       |
| 19248       | CakSNP19248    | <i>Kabuli</i>    | <i>Ca_Kabuli_denovo</i>      | 9595430                        | (C/T)       |
| 19249       | CakSNP19249    | <i>Kabuli</i>    | <i>Ca_Kabuli_denovo</i>      | 9595612                        | (T/G)       |
| 19250       | CakSNP19250    | <i>Kabuli</i>    | <i>Ca_Kabuli_denovo</i>      | 9595624                        | (C/G)       |
| 19251       | CakSNP19251    | <i>Kabuli</i>    | <i>Ca_Kabuli_denovo</i>      | 9602675                        | (T/C)       |
| 19252       | CakSNP19252    | <i>Kabuli</i>    | <i>Ca_Kabuli_denovo</i>      | 9607619                        | (G/A)       |
| 19253       | CakSNP19253    | <i>Kabuli</i>    | <i>Ca_Kabuli_denovo</i>      | 9608629                        | (C/T)       |
| 19254       | CakSNP19254    | <i>Kabuli</i>    | <i>Ca_Kabuli_denovo</i>      | 9611662                        | (C/T)       |
| 19255       | CakSNP19255    | <i>Kabuli</i>    | <i>Ca_Kabuli_denovo</i>      | 9611695                        | (A/C)       |
| 19256       | CakSNP19256    | <i>Kabuli</i>    | <i>Ca_Kabuli_denovo</i>      | 9612481                        | (C/T)       |
| 19257       | CakSNP19257    | <i>Kabuli</i>    | <i>Ca_Kabuli_denovo</i>      | 9615028                        | (G/T)       |
| 19258       | CakSNP19258    | <i>Kabuli</i>    | <i>Ca_Kabuli_denovo</i>      | 9619205                        | (G/A)       |
| 19259       | CakSNP19259    | <i>Kabuli</i>    | <i>Ca_Kabuli_denovo</i>      | 9622636                        | (A/C)       |
| 19260       | CakSNP19260    | <i>Kabuli</i>    | <i>Ca_Kabuli_denovo</i>      | 9624793                        | (T/C)       |
| 19261       | CakSNP19261    | <i>Kabuli</i>    | <i>Ca_Kabuli_denovo</i>      | 9626464                        | (G/A)       |
| 19262       | CakSNP19262    | <i>Kabuli</i>    | <i>Ca_Kabuli_denovo</i>      | 9626469                        | (G/A)       |
| 19263       | CakSNP19263    | <i>Kabuli</i>    | <i>Ca_Kabuli_denovo</i>      | 9626640                        | (G/T)       |
| 19264       | CakSNP19264    | <i>Kabuli</i>    | <i>Ca_Kabuli_denovo</i>      | 9626684                        | (C/G)       |

| <b>S.N.</b> | <b>SNP IDs</b> | <b>Cultivars</b> | <b>Chromosomes/scaffolds</b> | <b>Physical positions (bp)</b> | <b>SNPs</b> |
|-------------|----------------|------------------|------------------------------|--------------------------------|-------------|
| 19265       | CakSNP19265    | <i>Kabuli</i>    | <i>Ca_Kabuli_denovo</i>      | 9627699                        | (T/C)       |
| 19266       | CakSNP19266    | <i>Kabuli</i>    | <i>Ca_Kabuli_denovo</i>      | 9628193                        | (A/G)       |
| 19267       | CakSNP19267    | <i>Kabuli</i>    | <i>Ca_Kabuli_denovo</i>      | 9628195                        | (T/G)       |
| 19268       | CakSNP19268    | <i>Kabuli</i>    | <i>Ca_Kabuli_denovo</i>      | 9633018                        | (A/C)       |
| 19269       | CakSNP19269    | <i>Kabuli</i>    | <i>Ca_Kabuli_denovo</i>      | 9633019                        | (G/A)       |
| 19270       | CakSNP19270    | <i>Kabuli</i>    | <i>Ca_Kabuli_denovo</i>      | 9634980                        | (C/G)       |
| 19271       | CakSNP19271    | <i>Kabuli</i>    | <i>Ca_Kabuli_denovo</i>      | 9634986                        | (C/T)       |
| 19272       | CakSNP19272    | <i>Kabuli</i>    | <i>Ca_Kabuli_denovo</i>      | 9635479                        | (G/A)       |
| 19273       | CakSNP19273    | <i>Kabuli</i>    | <i>Ca_Kabuli_denovo</i>      | 9639661                        | (A/G)       |
| 19274       | CakSNP19274    | <i>Kabuli</i>    | <i>Ca_Kabuli_denovo</i>      | 9639705                        | (C/A)       |
| 19275       | CakSNP19275    | <i>Kabuli</i>    | <i>Ca_Kabuli_denovo</i>      | 9648137                        | (G/A)       |
| 19276       | CakSNP19276    | <i>Kabuli</i>    | <i>Ca_Kabuli_denovo</i>      | 9650779                        | (A/G)       |
| 19277       | CakSNP19277    | <i>Kabuli</i>    | <i>Ca_Kabuli_denovo</i>      | 9653500                        | (G/A)       |
| 19278       | CakSNP19278    | <i>Kabuli</i>    | <i>Ca_Kabuli_denovo</i>      | 9653548                        | (G/T)       |
| 19279       | CakSNP19279    | <i>Kabuli</i>    | <i>Ca_Kabuli_denovo</i>      | 9655416                        | (G/C)       |
| 19280       | CakSNP19280    | <i>Kabuli</i>    | <i>Ca_Kabuli_denovo</i>      | 9655928                        | (C/G)       |
| 19281       | CakSNP19281    | <i>Kabuli</i>    | <i>Ca_Kabuli_denovo</i>      | 9658278                        | (G/A)       |
| 19282       | CakSNP19282    | <i>Kabuli</i>    | <i>Ca_Kabuli_denovo</i>      | 9660064                        | (C/G)       |
| 19283       | CakSNP19283    | <i>Kabuli</i>    | <i>Ca_Kabuli_denovo</i>      | 9661613                        | (G/C)       |
| 19284       | CakSNP19284    | <i>Kabuli</i>    | <i>Ca_Kabuli_denovo</i>      | 9664866                        | (C/T)       |
| 19285       | CakSNP19285    | <i>Kabuli</i>    | <i>Ca_Kabuli_denovo</i>      | 9664901                        | (G/C)       |
| 19286       | CakSNP19286    | <i>Kabuli</i>    | <i>Ca_Kabuli_denovo</i>      | 9668776                        | (G/T)       |
| 19287       | CakSNP19287    | <i>Kabuli</i>    | <i>Ca_Kabuli_denovo</i>      | 9672444                        | (T/C)       |
| 19288       | CakSNP19288    | <i>Kabuli</i>    | <i>Ca_Kabuli_denovo</i>      | 9672812                        | (G/A)       |
| 19289       | CakSNP19289    | <i>Kabuli</i>    | <i>Ca_Kabuli_denovo</i>      | 9678908                        | (A/G)       |
| 19290       | CakSNP19290    | <i>Kabuli</i>    | <i>Ca_Kabuli_denovo</i>      | 9678917                        | (C/T)       |
| 19291       | CakSNP19291    | <i>Kabuli</i>    | <i>Ca_Kabuli_denovo</i>      | 9679714                        | (T/G)       |
| 19292       | CakSNP19292    | <i>Kabuli</i>    | <i>Ca_Kabuli_denovo</i>      | 9681415                        | (G/C)       |
| 19293       | CakSNP19293    | <i>Kabuli</i>    | <i>Ca_Kabuli_denovo</i>      | 9685223                        | (G/C)       |
| 19294       | CakSNP19294    | <i>Kabuli</i>    | <i>Ca_Kabuli_denovo</i>      | 9689620                        | (A/G)       |
| 19295       | CakSNP19295    | <i>Kabuli</i>    | <i>Ca_Kabuli_denovo</i>      | 9689670                        | (A/G)       |
| 19296       | CakSNP19296    | <i>Kabuli</i>    | <i>Ca_Kabuli_denovo</i>      | 9699577                        | (C/T)       |
| 19297       | CakSNP19297    | <i>Kabuli</i>    | <i>Ca_Kabuli_denovo</i>      | 9702980                        | (T/C)       |
| 19298       | CakSNP19298    | <i>Kabuli</i>    | <i>Ca_Kabuli_denovo</i>      | 9702994                        | (T/C)       |
| 19299       | CakSNP19299    | <i>Kabuli</i>    | <i>Ca_Kabuli_denovo</i>      | 9718247                        | (G/A)       |
| 19300       | CakSNP19300    | <i>Kabuli</i>    | <i>Ca_Kabuli_denovo</i>      | 9718330                        | (C/A)       |
| 19301       | CakSNP19301    | <i>Kabuli</i>    | <i>Ca_Kabuli_denovo</i>      | 9718375                        | (C/T)       |
| 19302       | CakSNP19302    | <i>Kabuli</i>    | <i>Ca_Kabuli_denovo</i>      | 9719868                        | (T/C)       |
| 19303       | CakSNP19303    | <i>Kabuli</i>    | <i>Ca_Kabuli_denovo</i>      | 9720016                        | (T/C)       |



| <b>S.N.</b> | <b>SNP IDs</b> | <b>Cultivars</b> | <b>Chromosomes/scaffolds</b> | <b>Physical positions (bp)</b> | <b>SNPs</b> |
|-------------|----------------|------------------|------------------------------|--------------------------------|-------------|
| 19304       | CakSNP19304    | <i>Kabuli</i>    | <i>Ca_Kabuli_denovo</i>      | 9720034                        | (A/G)       |
| 19305       | CakSNP19305    | <i>Kabuli</i>    | <i>Ca_Kabuli_denovo</i>      | 9725329                        | (A/C)       |
| 19306       | CakSNP19306    | <i>Kabuli</i>    | <i>Ca_Kabuli_denovo</i>      | 9726829                        | (G/T)       |
| 19307       | CakSNP19307    | <i>Kabuli</i>    | <i>Ca_Kabuli_denovo</i>      | 9726834                        | (T/C)       |
| 19308       | CakSNP19308    | <i>Kabuli</i>    | <i>Ca_Kabuli_denovo</i>      | 9730519                        | (A/G)       |
| 19309       | CakSNP19309    | <i>Kabuli</i>    | <i>Ca_Kabuli_denovo</i>      | 9730534                        | (C/A)       |
| 19310       | CakSNP19310    | <i>Kabuli</i>    | <i>Ca_Kabuli_denovo</i>      | 9737591                        | (A/G)       |
| 19311       | CakSNP19311    | <i>Kabuli</i>    | <i>Ca_Kabuli_denovo</i>      | 9738624                        | (A/C)       |
| 19312       | CakSNP19312    | <i>Kabuli</i>    | <i>Ca_Kabuli_denovo</i>      | 9738660                        | (G/A)       |
| 19313       | CakSNP19313    | <i>Kabuli</i>    | <i>Ca_Kabuli_denovo</i>      | 9739260                        | (A/C)       |
| 19314       | CakSNP19314    | <i>Kabuli</i>    | <i>Ca_Kabuli_denovo</i>      | 9739831                        | (G/A)       |
| 19315       | CakSNP19315    | <i>Kabuli</i>    | <i>Ca_Kabuli_denovo</i>      | 9741292                        | (C/A)       |
| 19316       | CakSNP19316    | <i>Kabuli</i>    | <i>Ca_Kabuli_denovo</i>      | 9751264                        | (G/C)       |
| 19317       | CakSNP19317    | <i>Kabuli</i>    | <i>Ca_Kabuli_denovo</i>      | 9751267                        | (C/T)       |
| 19318       | CakSNP19318    | <i>Kabuli</i>    | <i>Ca_Kabuli_denovo</i>      | 9751700                        | (A/C)       |
| 19319       | CakSNP19319    | <i>Kabuli</i>    | <i>Ca_Kabuli_denovo</i>      | 9751701                        | (G/A)       |
| 19320       | CakSNP19320    | <i>Kabuli</i>    | <i>Ca_Kabuli_denovo</i>      | 9758471                        | (C/T)       |
| 19321       | CakSNP19321    | <i>Kabuli</i>    | <i>Ca_Kabuli_denovo</i>      | 9765484                        | (C/G)       |
| 19322       | CakSNP19322    | <i>Kabuli</i>    | <i>Ca_Kabuli_denovo</i>      | 9765523                        | (T/C)       |
| 19323       | CakSNP19323    | <i>Kabuli</i>    | <i>Ca_Kabuli_denovo</i>      | 9766654                        | (C/T)       |
| 19324       | CakSNP19324    | <i>Kabuli</i>    | <i>Ca_Kabuli_denovo</i>      | 9780824                        | (T/C)       |
| 19325       | CakSNP19325    | <i>Kabuli</i>    | <i>Ca_Kabuli_denovo</i>      | 9780872                        | (T/C)       |
| 19326       | CakSNP19326    | <i>Kabuli</i>    | <i>Ca_Kabuli_denovo</i>      | 9781196                        | (C/T)       |
| 19327       | CakSNP19327    | <i>Kabuli</i>    | <i>Ca_Kabuli_denovo</i>      | 9781236                        | (A/G)       |
| 19328       | CakSNP19328    | <i>Kabuli</i>    | <i>Ca_Kabuli_denovo</i>      | 9783341                        | (A/G)       |
| 19329       | CakSNP19329    | <i>Kabuli</i>    | <i>Ca_Kabuli_denovo</i>      | 9786959                        | (G/C)       |
| 19330       | CakSNP19330    | <i>Kabuli</i>    | <i>Ca_Kabuli_denovo</i>      | 9788350                        | (G/A)       |
| 19331       | CakSNP19331    | <i>Kabuli</i>    | <i>Ca_Kabuli_denovo</i>      | 9788437                        | (T/C)       |
| 19332       | CakSNP19332    | <i>Kabuli</i>    | <i>Ca_Kabuli_denovo</i>      | 9793854                        | (C/G)       |
| 19333       | CakSNP19333    | <i>Kabuli</i>    | <i>Ca_Kabuli_denovo</i>      | 9802771                        | (T/G)       |
| 19334       | CakSNP19334    | <i>Kabuli</i>    | <i>Ca_Kabuli_denovo</i>      | 9804090                        | (G/A)       |
| 19335       | CakSNP19335    | <i>Kabuli</i>    | <i>Ca_Kabuli_denovo</i>      | 9804109                        | (C/T)       |
| 19336       | CakSNP19336    | <i>Kabuli</i>    | <i>Ca_Kabuli_denovo</i>      | 9804576                        | (G/A)       |
| 19337       | CakSNP19337    | <i>Kabuli</i>    | <i>Ca_Kabuli_denovo</i>      | 9809489                        | (T/C)       |
| 19338       | CakSNP19338    | <i>Kabuli</i>    | <i>Ca_Kabuli_denovo</i>      | 9809493                        | (T/C)       |
| 19339       | CakSNP19339    | <i>Kabuli</i>    | <i>Ca_Kabuli_denovo</i>      | 9815146                        | (G/T)       |
| 19340       | CakSNP19340    | <i>Kabuli</i>    | <i>Ca_Kabuli_denovo</i>      | 9815151                        | (A/T)       |
| 19341       | CakSNP19341    | <i>Kabuli</i>    | <i>Ca_Kabuli_denovo</i>      | 9823378                        | (C/G)       |
| 19342       | CakSNP19342    | <i>Kabuli</i>    | <i>Ca_Kabuli_denovo</i>      | 9830944                        | (C/T)       |

| <b>S.N.</b> | <b>SNP IDs</b> | <b>Cultivars</b> | <b>Chromosomes/scaffolds</b> | <b>Physical positions (bp)</b> | <b>SNPs</b> |
|-------------|----------------|------------------|------------------------------|--------------------------------|-------------|
| 19343       | CakSNP19343    | <i>Kabuli</i>    | <i>Ca_Kabuli_denovo</i>      | 9830977                        | (T/C)       |
| 19344       | CakSNP19344    | <i>Kabuli</i>    | <i>Ca_Kabuli_denovo</i>      | 9832549                        | (G/A)       |
| 19345       | CakSNP19345    | <i>Kabuli</i>    | <i>Ca_Kabuli_denovo</i>      | 9833972                        | (G/A)       |
| 19346       | CakSNP19346    | <i>Kabuli</i>    | <i>Ca_Kabuli_denovo</i>      | 9836572                        | (G/T)       |
| 19347       | CakSNP19347    | <i>Kabuli</i>    | <i>Ca_Kabuli_denovo</i>      | 9845280                        | (A/C)       |
| 19348       | CakSNP19348    | <i>Kabuli</i>    | <i>Ca_Kabuli_denovo</i>      | 9845868                        | (T/C)       |
| 19349       | CakSNP19349    | <i>Kabuli</i>    | <i>Ca_Kabuli_denovo</i>      | 9847577                        | (C/A)       |
| 19350       | CakSNP19350    | <i>Kabuli</i>    | <i>Ca_Kabuli_denovo</i>      | 9847585                        | (G/A)       |
| 19351       | CakSNP19351    | <i>Kabuli</i>    | <i>Ca_Kabuli_denovo</i>      | 9848680                        | (G/C)       |
| 19352       | CakSNP19352    | <i>Kabuli</i>    | <i>Ca_Kabuli_denovo</i>      | 9850046                        | (A/G)       |
| 19353       | CakSNP19353    | <i>Kabuli</i>    | <i>Ca_Kabuli_denovo</i>      | 9853101                        | (A/C)       |
| 19354       | CakSNP19354    | <i>Kabuli</i>    | <i>Ca_Kabuli_denovo</i>      | 9863140                        | (A/G)       |
| 19355       | CakSNP19355    | <i>Kabuli</i>    | <i>Ca_Kabuli_denovo</i>      | 9863513                        | (T/C)       |
| 19356       | CakSNP19356    | <i>Kabuli</i>    | <i>Ca_Kabuli_denovo</i>      | 9863525                        | (G/C)       |
| 19357       | CakSNP19357    | <i>Kabuli</i>    | <i>Ca_Kabuli_denovo</i>      | 9865957                        | (C/T)       |
| 19358       | CakSNP19358    | <i>Kabuli</i>    | <i>Ca_Kabuli_denovo</i>      | 9870575                        | (T/C)       |
| 19359       | CakSNP19359    | <i>Kabuli</i>    | <i>Ca_Kabuli_denovo</i>      | 9872528                        | (T/G)       |
| 19360       | CakSNP19360    | <i>Kabuli</i>    | <i>Ca_Kabuli_denovo</i>      | 9872591                        | (C/G)       |
| 19361       | CakSNP19361    | <i>Kabuli</i>    | <i>Ca_Kabuli_denovo</i>      | 9878441                        | (A/G)       |
| 19362       | CakSNP19362    | <i>Kabuli</i>    | <i>Ca_Kabuli_denovo</i>      | 9880795                        | (C/G)       |
| 19363       | CakSNP19363    | <i>Kabuli</i>    | <i>Ca_Kabuli_denovo</i>      | 9881788                        | (G/T)       |
| 19364       | CakSNP19364    | <i>Kabuli</i>    | <i>Ca_Kabuli_denovo</i>      | 9881800                        | (A/G)       |
| 19365       | CakSNP19365    | <i>Kabuli</i>    | <i>Ca_Kabuli_denovo</i>      | 9884524                        | (T/G)       |
| 19366       | CakSNP19366    | <i>Kabuli</i>    | <i>Ca_Kabuli_denovo</i>      | 9885838                        | (G/C)       |
| 19367       | CakSNP19367    | <i>Kabuli</i>    | <i>Ca_Kabuli_denovo</i>      | 9889813                        | (T/C)       |
| 19368       | CakSNP19368    | <i>Kabuli</i>    | <i>Ca_Kabuli_denovo</i>      | 9891114                        | (G/T)       |
| 19369       | CakSNP19369    | <i>Kabuli</i>    | <i>Ca_Kabuli_denovo</i>      | 9891158                        | (T/C)       |
| 19370       | CakSNP19370    | <i>Kabuli</i>    | <i>Ca_Kabuli_denovo</i>      | 9891452                        | (A/G)       |
| 19371       | CakSNP19371    | <i>Kabuli</i>    | <i>Ca_Kabuli_denovo</i>      | 9896914                        | (G/A)       |
| 19372       | CakSNP19372    | <i>Kabuli</i>    | <i>Ca_Kabuli_denovo</i>      | 9896968                        | (G/A)       |
| 19373       | CakSNP19373    | <i>Kabuli</i>    | <i>Ca_Kabuli_denovo</i>      | 9899452                        | (C/G)       |
| 19374       | CakSNP19374    | <i>Kabuli</i>    | <i>Ca_Kabuli_denovo</i>      | 9901759                        | (C/T)       |
| 19375       | CakSNP19375    | <i>Kabuli</i>    | <i>Ca_Kabuli_denovo</i>      | 9901779                        | (G/C)       |
| 19376       | CakSNP19376    | <i>Kabuli</i>    | <i>Ca_Kabuli_denovo</i>      | 9908975                        | (T/C)       |
| 19377       | CakSNP19377    | <i>Kabuli</i>    | <i>Ca_Kabuli_denovo</i>      | 9913858                        | (G/T)       |
| 19378       | CakSNP19378    | <i>Kabuli</i>    | <i>Ca_Kabuli_denovo</i>      | 9913864                        | (G/A)       |
| 19379       | CakSNP19379    | <i>Kabuli</i>    | <i>Ca_Kabuli_denovo</i>      | 9914830                        | (G/T)       |
| 19380       | CakSNP19380    | <i>Kabuli</i>    | <i>Ca_Kabuli_denovo</i>      | 9915716                        | (C/G)       |
| 19381       | CakSNP19381    | <i>Kabuli</i>    | <i>Ca_Kabuli_denovo</i>      | 9915762                        | (T/G)       |

| <b>S.N.</b> | <b>SNP IDs</b> | <b>Cultivars</b> | <b>Chromosomes/scaffolds</b> | <b>Physical positions (bp)</b> | <b>SNPs</b> |
|-------------|----------------|------------------|------------------------------|--------------------------------|-------------|
| 19382       | CakSNP19382    | <i>Kabuli</i>    | <i>Ca_Kabuli_denovo</i>      | 9915772                        | (C/G)       |
| 19383       | CakSNP19383    | <i>Kabuli</i>    | <i>Ca_Kabuli_denovo</i>      | 9918090                        | (C/A)       |
| 19384       | CakSNP19384    | <i>Kabuli</i>    | <i>Ca_Kabuli_denovo</i>      | 9918838                        | (C/G)       |
| 19385       | CakSNP19385    | <i>Kabuli</i>    | <i>Ca_Kabuli_denovo</i>      | 9918841                        | (A/G)       |
| 19386       | CakSNP19386    | <i>Kabuli</i>    | <i>Ca_Kabuli_denovo</i>      | 9918853                        | (C/T)       |
| 19387       | CakSNP19387    | <i>Kabuli</i>    | <i>Ca_Kabuli_denovo</i>      | 9923995                        | (C/T)       |
| 19388       | CakSNP19388    | <i>Kabuli</i>    | <i>Ca_Kabuli_denovo</i>      | 9924598                        | (C/T)       |
| 19389       | CakSNP19389    | <i>Kabuli</i>    | <i>Ca_Kabuli_denovo</i>      | 9924640                        | (T/A)       |
| 19390       | CakSNP19390    | <i>Kabuli</i>    | <i>Ca_Kabuli_denovo</i>      | 9924819                        | (G/T)       |
| 19391       | CakSNP19391    | <i>Kabuli</i>    | <i>Ca_Kabuli_denovo</i>      | 9924862                        | (G/A)       |
| 19392       | CakSNP19392    | <i>Kabuli</i>    | <i>Ca_Kabuli_denovo</i>      | 9929093                        | (C/T)       |
| 19393       | CakSNP19393    | <i>Kabuli</i>    | <i>Ca_Kabuli_denovo</i>      | 9932690                        | (G/A)       |
| 19394       | CakSNP19394    | <i>Kabuli</i>    | <i>Ca_Kabuli_denovo</i>      | 9932696                        | (G/C)       |
| 19395       | CakSNP19395    | <i>Kabuli</i>    | <i>Ca_Kabuli_denovo</i>      | 9933865                        | (G/C)       |
| 19396       | CakSNP19396    | <i>Kabuli</i>    | <i>Ca_Kabuli_denovo</i>      | 9933889                        | (A/G)       |
| 19397       | CakSNP19397    | <i>Kabuli</i>    | <i>Ca_Kabuli_denovo</i>      | 9937838                        | (T/C)       |
| 19398       | CakSNP19398    | <i>Kabuli</i>    | <i>Ca_Kabuli_denovo</i>      | 9938641                        | (A/G)       |
| 19399       | CakSNP19399    | <i>Kabuli</i>    | <i>Ca_Kabuli_denovo</i>      | 9938665                        | (G/C)       |
| 19400       | CakSNP19400    | <i>Kabuli</i>    | <i>Ca_Kabuli_denovo</i>      | 9940609                        | (C/T)       |
| 19401       | CakSNP19401    | <i>Kabuli</i>    | <i>Ca_Kabuli_denovo</i>      | 9942826                        | (T/C)       |
| 19402       | CakSNP19402    | <i>Kabuli</i>    | <i>Ca_Kabuli_denovo</i>      | 9942846                        | (A/G)       |
| 19403       | CakSNP19403    | <i>Kabuli</i>    | <i>Ca_Kabuli_denovo</i>      | 9947560                        | (A/C)       |
| 19404       | CakSNP19404    | <i>Kabuli</i>    | <i>Ca_Kabuli_denovo</i>      | 9951000                        | (A/G)       |
| 19405       | CakSNP19405    | <i>Kabuli</i>    | <i>Ca_Kabuli_denovo</i>      | 9962011                        | (G/A)       |
| 19406       | CakSNP19406    | <i>Kabuli</i>    | <i>Ca_Kabuli_denovo</i>      | 9962035                        | (C/T)       |
| 19407       | CakSNP19407    | <i>Kabuli</i>    | <i>Ca_Kabuli_denovo</i>      | 9973611                        | (G/T)       |
| 19408       | CakSNP19408    | <i>Kabuli</i>    | <i>Ca_Kabuli_denovo</i>      | 9973617                        | (T/C)       |
| 19409       | CakSNP19409    | <i>Kabuli</i>    | <i>Ca_Kabuli_denovo</i>      | 9973620                        | (A/G)       |
| 19410       | CakSNP19410    | <i>Kabuli</i>    | <i>Ca_Kabuli_denovo</i>      | 9974899                        | (G/A)       |
| 19411       | CakSNP19411    | <i>Kabuli</i>    | <i>Ca_Kabuli_denovo</i>      | 9976962                        | (T/C)       |
| 19412       | CakSNP19412    | <i>Kabuli</i>    | <i>Ca_Kabuli_denovo</i>      | 9976966                        | (A/G)       |
| 19413       | CakSNP19413    | <i>Kabuli</i>    | <i>Ca_Kabuli_denovo</i>      | 9981376                        | (A/C)       |
| 19414       | CakSNP19414    | <i>Kabuli</i>    | <i>Ca_Kabuli_denovo</i>      | 9981406                        | (G/T)       |
| 19415       | CakSNP19415    | <i>Kabuli</i>    | <i>Ca_Kabuli_denovo</i>      | 9985529                        | (C/G)       |
| 19416       | CakSNP19416    | <i>Kabuli</i>    | <i>Ca_Kabuli_denovo</i>      | 9985544                        | (C/G)       |
| 19417       | CakSNP19417    | <i>Kabuli</i>    | <i>Ca_Kabuli_denovo</i>      | 9996966                        | (G/A)       |
| 19418       | CakSNP19418    | <i>Kabuli</i>    | <i>Ca_Kabuli_denovo</i>      | 9996979                        | (G/T)       |
| 19419       | CakSNP19419    | <i>Kabuli</i>    | <i>Ca_Kabuli_denovo</i>      | 10003680                       | (G/T)       |
| 19420       | CakSNP19420    | <i>Kabuli</i>    | <i>Ca_Kabuli_denovo</i>      | 10008824                       | (T/C)       |

| <b>S.N.</b> | <b>SNP IDs</b> | <b>Cultivars</b> | <b>Chromosomes/scaffolds</b> | <b>Physical positions (bp)</b> | <b>SNPs</b> |
|-------------|----------------|------------------|------------------------------|--------------------------------|-------------|
| 19421       | CakSNP19421    | <i>Kabuli</i>    | <i>Ca_Kabuli_denovo</i>      | 10009526                       | (T/C)       |
| 19422       | CakSNP19422    | <i>Kabuli</i>    | <i>Ca_Kabuli_denovo</i>      | 10012784                       | (A/G)       |
| 19423       | CakSNP19423    | <i>Kabuli</i>    | <i>Ca_Kabuli_denovo</i>      | 10012811                       | (G/C)       |
| 19424       | CakSNP19424    | <i>Kabuli</i>    | <i>Ca_Kabuli_denovo</i>      | 10013047                       | (C/T)       |
| 19425       | CakSNP19425    | <i>Kabuli</i>    | <i>Ca_Kabuli_denovo</i>      | 10013311                       | (A/C)       |
| 19426       | CakSNP19426    | <i>Kabuli</i>    | <i>Ca_Kabuli_denovo</i>      | 10013608                       | (T/C)       |
| 19427       | CakSNP19427    | <i>Kabuli</i>    | <i>Ca_Kabuli_denovo</i>      | 10013617                       | (T/G)       |
| 19428       | CakSNP19428    | <i>Kabuli</i>    | <i>Ca_Kabuli_denovo</i>      | 10015026                       | (C/G)       |
| 19429       | CakSNP19429    | <i>Kabuli</i>    | <i>Ca_Kabuli_denovo</i>      | 10015729                       | (T/G)       |
| 19430       | CakSNP19430    | <i>Kabuli</i>    | <i>Ca_Kabuli_denovo</i>      | 10016049                       | (C/A)       |
| 19431       | CakSNP19431    | <i>Kabuli</i>    | <i>Ca_Kabuli_denovo</i>      | 10019860                       | (A/G)       |
| 19432       | CakSNP19432    | <i>Kabuli</i>    | <i>Ca_Kabuli_denovo</i>      | 10019905                       | (A/G)       |
| 19433       | CakSNP19433    | <i>Kabuli</i>    | <i>Ca_Kabuli_denovo</i>      | 10022721                       | (T/C)       |
| 19434       | CakSNP19434    | <i>Kabuli</i>    | <i>Ca_Kabuli_denovo</i>      | 10022740                       | (C/A)       |
| 19435       | CakSNP19435    | <i>Kabuli</i>    | <i>Ca_Kabuli_denovo</i>      | 10032574                       | (T/C)       |
| 19436       | CakSNP19436    | <i>Kabuli</i>    | <i>Ca_Kabuli_denovo</i>      | 10032577                       | (T/G)       |
| 19437       | CakSNP19437    | <i>Kabuli</i>    | <i>Ca_Kabuli_denovo</i>      | 10039375                       | (C/G)       |
| 19438       | CakSNP19438    | <i>Kabuli</i>    | <i>Ca_Kabuli_denovo</i>      | 10039400                       | (C/T)       |
| 19439       | CakSNP19439    | <i>Kabuli</i>    | <i>Ca_Kabuli_denovo</i>      | 10040960                       | (T/C)       |
| 19440       | CakSNP19440    | <i>Kabuli</i>    | <i>Ca_Kabuli_denovo</i>      | 10041262                       | (T/G)       |
| 19441       | CakSNP19441    | <i>Kabuli</i>    | <i>Ca_Kabuli_denovo</i>      | 10043768                       | (T/C)       |
| 19442       | CakSNP19442    | <i>Kabuli</i>    | <i>Ca_Kabuli_denovo</i>      | 10045315                       | (A/G)       |
| 19443       | CakSNP19443    | <i>Kabuli</i>    | <i>Ca_Kabuli_denovo</i>      | 10045339                       | (C/G)       |
| 19444       | CakSNP19444    | <i>Kabuli</i>    | <i>Ca_Kabuli_denovo</i>      | 10061400                       | (T/C)       |
| 19445       | CakSNP19445    | <i>Kabuli</i>    | <i>Ca_Kabuli_denovo</i>      | 10061401                       | (T/C)       |
| 19446       | CakSNP19446    | <i>Kabuli</i>    | <i>Ca_Kabuli_denovo</i>      | 10061405                       | (C/G)       |
| 19447       | CakSNP19447    | <i>Kabuli</i>    | <i>Ca_Kabuli_denovo</i>      | 10068192                       | (T/C)       |
| 19448       | CakSNP19448    | <i>Kabuli</i>    | <i>Ca_Kabuli_denovo</i>      | 10070360                       | (G/C)       |
| 19449       | CakSNP19449    | <i>Kabuli</i>    | <i>Ca_Kabuli_denovo</i>      | 10077413                       | (C/T)       |
| 19450       | CakSNP19450    | <i>Kabuli</i>    | <i>Ca_Kabuli_denovo</i>      | 10077418                       | (C/T)       |
| 19451       | CakSNP19451    | <i>Kabuli</i>    | <i>Ca_Kabuli_denovo</i>      | 10078621                       | (C/T)       |
| 19452       | CakSNP19452    | <i>Kabuli</i>    | <i>Ca_Kabuli_denovo</i>      | 10084025                       | (T/C)       |
| 19453       | CakSNP19453    | <i>Kabuli</i>    | <i>Ca_Kabuli_denovo</i>      | 10086513                       | (A/G)       |
| 19454       | CakSNP19454    | <i>Kabuli</i>    | <i>Ca_Kabuli_denovo</i>      | 10086534                       | (C/T)       |
| 19455       | CakSNP19455    | <i>Kabuli</i>    | <i>Ca_Kabuli_denovo</i>      | 10088290                       | (T/C)       |
| 19456       | CakSNP19456    | <i>Kabuli</i>    | <i>Ca_Kabuli_denovo</i>      | 10090741                       | (G/C)       |
| 19457       | CakSNP19457    | <i>Kabuli</i>    | <i>Ca_Kabuli_denovo</i>      | 10090793                       | (G/A)       |
| 19458       | CakSNP19458    | <i>Kabuli</i>    | <i>Ca_Kabuli_denovo</i>      | 10091452                       | (G/C)       |
| 19459       | CakSNP19459    | <i>Kabuli</i>    | <i>Ca_Kabuli_denovo</i>      | 10091458                       | (C/T)       |

| <b>S.N.</b> | <b>SNP IDs</b> | <b>Cultivars</b> | <b>Chromosomes/scaffolds</b> | <b>Physical positions (bp)</b> | <b>SNPs</b> |
|-------------|----------------|------------------|------------------------------|--------------------------------|-------------|
| 19460       | CakSNP19460    | <i>Kabuli</i>    | <i>Ca_Kabuli_denovo</i>      | 10093966                       | (A/G)       |
| 19461       | CakSNP19461    | <i>Kabuli</i>    | <i>Ca_Kabuli_denovo</i>      | 10093969                       | (C/A)       |
| 19462       | CakSNP19462    | <i>Kabuli</i>    | <i>Ca_Kabuli_denovo</i>      | 10096801                       | (A/G)       |
| 19463       | CakSNP19463    | <i>Kabuli</i>    | <i>Ca_Kabuli_denovo</i>      | 10096810                       | (C/T)       |
| 19464       | CakSNP19464    | <i>Kabuli</i>    | <i>Ca_Kabuli_denovo</i>      | 10097986                       | (T/C)       |
| 19465       | CakSNP19465    | <i>Kabuli</i>    | <i>Ca_Kabuli_denovo</i>      | 10101482                       | (C/T)       |
| 19466       | CakSNP19466    | <i>Kabuli</i>    | <i>Ca_Kabuli_denovo</i>      | 10101496                       | (C/T)       |
| 19467       | CakSNP19467    | <i>Kabuli</i>    | <i>Ca_Kabuli_denovo</i>      | 10103354                       | (T/G)       |
| 19468       | CakSNP19468    | <i>Kabuli</i>    | <i>Ca_Kabuli_denovo</i>      | 10103399                       | (A/C)       |
| 19469       | CakSNP19469    | <i>Kabuli</i>    | <i>Ca_Kabuli_denovo</i>      | 10104830                       | (C/T)       |
| 19470       | CakSNP19470    | <i>Kabuli</i>    | <i>Ca_Kabuli_denovo</i>      | 10104864                       | (G/A)       |
| 19471       | CakSNP19471    | <i>Kabuli</i>    | <i>Ca_Kabuli_denovo</i>      | 10109044                       | (C/G)       |
| 19472       | CakSNP19472    | <i>Kabuli</i>    | <i>Ca_Kabuli_denovo</i>      | 10112518                       | (A/C)       |
| 19473       | CakSNP19473    | <i>Kabuli</i>    | <i>Ca_Kabuli_denovo</i>      | 10112928                       | (A/C)       |
| 19474       | CakSNP19474    | <i>Kabuli</i>    | <i>Ca_Kabuli_denovo</i>      | 10112950                       | (G/C)       |
| 19475       | CakSNP19475    | <i>Kabuli</i>    | <i>Ca_Kabuli_denovo</i>      | 10117322                       | (C/T)       |
| 19476       | CakSNP19476    | <i>Kabuli</i>    | <i>Ca_Kabuli_denovo</i>      | 10117331                       | (T/G)       |
| 19477       | CakSNP19477    | <i>Kabuli</i>    | <i>Ca_Kabuli_denovo</i>      | 10124748                       | (A/G)       |
| 19478       | CakSNP19478    | <i>Kabuli</i>    | <i>Ca_Kabuli_denovo</i>      | 10124801                       | (G/A)       |
| 19479       | CakSNP19479    | <i>Kabuli</i>    | <i>Ca_Kabuli_denovo</i>      | 10129566                       | (G/C)       |
| 19480       | CakSNP19480    | <i>Kabuli</i>    | <i>Ca_Kabuli_denovo</i>      | 10129575                       | (T/C)       |
| 19481       | CakSNP19481    | <i>Kabuli</i>    | <i>Ca_Kabuli_denovo</i>      | 10137026                       | (C/G)       |
| 19482       | CakSNP19482    | <i>Kabuli</i>    | <i>Ca_Kabuli_denovo</i>      | 10137050                       | (T/C)       |
| 19483       | CakSNP19483    | <i>Kabuli</i>    | <i>Ca_Kabuli_denovo</i>      | 10138779                       | (A/C)       |
| 19484       | CakSNP19484    | <i>Kabuli</i>    | <i>Ca_Kabuli_denovo</i>      | 10141306                       | (G/T)       |
| 19485       | CakSNP19485    | <i>Kabuli</i>    | <i>Ca_Kabuli_denovo</i>      | 10141307                       | (T/C)       |
| 19486       | CakSNP19486    | <i>Kabuli</i>    | <i>Ca_Kabuli_denovo</i>      | 10141954                       | (A/G)       |
| 19487       | CakSNP19487    | <i>Kabuli</i>    | <i>Ca_Kabuli_denovo</i>      | 10142443                       | (C/T)       |
| 19488       | CakSNP19488    | <i>Kabuli</i>    | <i>Ca_Kabuli_denovo</i>      | 10145154                       | (A/G)       |
| 19489       | CakSNP19489    | <i>Kabuli</i>    | <i>Ca_Kabuli_denovo</i>      | 10149666                       | (T/C)       |
| 19490       | CakSNP19490    | <i>Kabuli</i>    | <i>Ca_Kabuli_denovo</i>      | 10149781                       | (G/A)       |
| 19491       | CakSNP19491    | <i>Kabuli</i>    | <i>Ca_Kabuli_denovo</i>      | 10149790                       | (A/G)       |
| 19492       | CakSNP19492    | <i>Kabuli</i>    | <i>Ca_Kabuli_denovo</i>      | 10149841                       | (T/C)       |
| 19493       | CakSNP19493    | <i>Kabuli</i>    | <i>Ca_Kabuli_denovo</i>      | 10149869                       | (A/C)       |
| 19494       | CakSNP19494    | <i>Kabuli</i>    | <i>Ca_Kabuli_denovo</i>      | 10156177                       | (T/C)       |
| 19495       | CakSNP19495    | <i>Kabuli</i>    | <i>Ca_Kabuli_denovo</i>      | 10156216                       | (G/C)       |
| 19496       | CakSNP19496    | <i>Kabuli</i>    | <i>Ca_Kabuli_denovo</i>      | 10168295                       | (G/A)       |
| 19497       | CakSNP19497    | <i>Kabuli</i>    | <i>Ca_Kabuli_denovo</i>      | 10168335                       | (A/G)       |
| 19498       | CakSNP19498    | <i>Kabuli</i>    | <i>Ca_Kabuli_denovo</i>      | 10169966                       | (G/A)       |

| <b>S.N.</b> | <b>SNP IDs</b> | <b>Cultivars</b> | <b>Chromosomes/scaffolds</b> | <b>Physical positions (bp)</b> | <b>SNPs</b> |
|-------------|----------------|------------------|------------------------------|--------------------------------|-------------|
| 19499       | CakSNP19499    | <i>Kabuli</i>    | <i>Ca_Kabuli_denovo</i>      | 10169996                       | (A/G)       |
| 19500       | CakSNP19500    | <i>Kabuli</i>    | <i>Ca_Kabuli_denovo</i>      | 10171792                       | (A/C)       |
| 19501       | CakSNP19501    | <i>Kabuli</i>    | <i>Ca_Kabuli_denovo</i>      | 10171816                       | (A/G)       |
| 19502       | CakSNP19502    | <i>Kabuli</i>    | <i>Ca_Kabuli_denovo</i>      | 10175611                       | (A/C)       |
| 19503       | CakSNP19503    | <i>Kabuli</i>    | <i>Ca_Kabuli_denovo</i>      | 10177607                       | (A/G)       |
| 19504       | CakSNP19504    | <i>Kabuli</i>    | <i>Ca_Kabuli_denovo</i>      | 10177613                       | (T/C)       |
| 19505       | CakSNP19505    | <i>Kabuli</i>    | <i>Ca_Kabuli_denovo</i>      | 10178789                       | (G/C)       |
| 19506       | CakSNP19506    | <i>Kabuli</i>    | <i>Ca_Kabuli_denovo</i>      | 10178804                       | (C/T)       |
| 19507       | CakSNP19507    | <i>Kabuli</i>    | <i>Ca_Kabuli_denovo</i>      | 10190673                       | (A/G)       |
| 19508       | CakSNP19508    | <i>Kabuli</i>    | <i>Ca_Kabuli_denovo</i>      | 10194406                       | (C/T)       |
| 19509       | CakSNP19509    | <i>Kabuli</i>    | <i>Ca_Kabuli_denovo</i>      | 10194475                       | (A/G)       |
| 19510       | CakSNP19510    | <i>Kabuli</i>    | <i>Ca_Kabuli_denovo</i>      | 10205609                       | (G/A)       |
| 19511       | CakSNP19511    | <i>Kabuli</i>    | <i>Ca_Kabuli_denovo</i>      | 10210572                       | (G/T)       |
| 19512       | CakSNP19512    | <i>Kabuli</i>    | <i>Ca_Kabuli_denovo</i>      | 10213833                       | (A/C)       |
| 19513       | CakSNP19513    | <i>Kabuli</i>    | <i>Ca_Kabuli_denovo</i>      | 10217093                       | (C/G)       |
| 19514       | CakSNP19514    | <i>Kabuli</i>    | <i>Ca_Kabuli_denovo</i>      | 10217104                       | (A/C)       |
| 19515       | CakSNP19515    | <i>Kabuli</i>    | <i>Ca_Kabuli_denovo</i>      | 10225142                       | (C/T)       |
| 19516       | CakSNP19516    | <i>Kabuli</i>    | <i>Ca_Kabuli_denovo</i>      | 10225149                       | (G/A)       |
| 19517       | CakSNP19517    | <i>Kabuli</i>    | <i>Ca_Kabuli_denovo</i>      | 10228761                       | (A/G)       |
| 19518       | CakSNP19518    | <i>Kabuli</i>    | <i>Ca_Kabuli_denovo</i>      | 10228762                       | (G/A)       |
| 19519       | CakSNP19519    | <i>Kabuli</i>    | <i>Ca_Kabuli_denovo</i>      | 10230849                       | (G/T)       |
| 19520       | CakSNP19520    | <i>Kabuli</i>    | <i>Ca_Kabuli_denovo</i>      | 10230851                       | (T/C)       |
| 19521       | CakSNP19521    | <i>Kabuli</i>    | <i>Ca_Kabuli_denovo</i>      | 10236737                       | (C/T)       |
| 19522       | CakSNP19522    | <i>Kabuli</i>    | <i>Ca_Kabuli_denovo</i>      | 10254467                       | (C/T)       |
| 19523       | CakSNP19523    | <i>Kabuli</i>    | <i>Ca_Kabuli_denovo</i>      | 10255898                       | (A/G)       |
| 19524       | CakSNP19524    | <i>Kabuli</i>    | <i>Ca_Kabuli_denovo</i>      | 10256594                       | (C/G)       |
| 19525       | CakSNP19525    | <i>Kabuli</i>    | <i>Ca_Kabuli_denovo</i>      | 10257196                       | (A/G)       |
| 19526       | CakSNP19526    | <i>Kabuli</i>    | <i>Ca_Kabuli_denovo</i>      | 10261646                       | (T/C)       |
| 19527       | CakSNP19527    | <i>Kabuli</i>    | <i>Ca_Kabuli_denovo</i>      | 10261700                       | (G/C)       |
| 19528       | CakSNP19528    | <i>Kabuli</i>    | <i>Ca_Kabuli_denovo</i>      | 10262876                       | (C/T)       |
| 19529       | CakSNP19529    | <i>Kabuli</i>    | <i>Ca_Kabuli_denovo</i>      | 10263678                       | (A/G)       |
| 19530       | CakSNP19530    | <i>Kabuli</i>    | <i>Ca_Kabuli_denovo</i>      | 10265917                       | (C/T)       |
| 19531       | CakSNP19531    | <i>Kabuli</i>    | <i>Ca_Kabuli_denovo</i>      | 10265974                       | (C/A)       |
| 19532       | CakSNP19532    | <i>Kabuli</i>    | <i>Ca_Kabuli_denovo</i>      | 10269550                       | (C/T)       |
| 19533       | CakSNP19533    | <i>Kabuli</i>    | <i>Ca_Kabuli_denovo</i>      | 10269607                       | (T/G)       |
| 19534       | CakSNP19534    | <i>Kabuli</i>    | <i>Ca_Kabuli_denovo</i>      | 10274756                       | (G/T)       |
| 19535       | CakSNP19535    | <i>Kabuli</i>    | <i>Ca_Kabuli_denovo</i>      | 10274772                       | (T/C)       |
| 19536       | CakSNP19536    | <i>Kabuli</i>    | <i>Ca_Kabuli_denovo</i>      | 10279030                       | (C/T)       |
| 19537       | CakSNP19537    | <i>Kabuli</i>    | <i>Ca_Kabuli_denovo</i>      | 10280444                       | (A/G)       |

| <b>S.N.</b> | <b>SNP IDs</b> | <b>Cultivars</b> | <b>Chromosomes/scaffolds</b> | <b>Physical positions (bp)</b> | <b>SNPs</b> |
|-------------|----------------|------------------|------------------------------|--------------------------------|-------------|
| 19538       | CakSNP19538    | <i>Kabuli</i>    | <i>Ca_Kabuli_denovo</i>      | 10286367                       | (T/C)       |
| 19539       | CakSNP19539    | <i>Kabuli</i>    | <i>Ca_Kabuli_denovo</i>      | 10288899                       | (T/A)       |
| 19540       | CakSNP19540    | <i>Kabuli</i>    | <i>Ca_Kabuli_denovo</i>      | 10288969                       | (C/T)       |
| 19541       | CakSNP19541    | <i>Kabuli</i>    | <i>Ca_Kabuli_denovo</i>      | 10290935                       | (A/G)       |
| 19542       | CakSNP19542    | <i>Kabuli</i>    | <i>Ca_Kabuli_denovo</i>      | 10291504                       | (G/A)       |
| 19543       | CakSNP19543    | <i>Kabuli</i>    | <i>Ca_Kabuli_denovo</i>      | 10291534                       | (C/T)       |
| 19544       | CakSNP19544    | <i>Kabuli</i>    | <i>Ca_Kabuli_denovo</i>      | 10292621                       | (T/C)       |
| 19545       | CakSNP19545    | <i>Kabuli</i>    | <i>Ca_Kabuli_denovo</i>      | 10300039                       | (G/A)       |
| 19546       | CakSNP19546    | <i>Kabuli</i>    | <i>Ca_Kabuli_denovo</i>      | 10309223                       | (C/G)       |
| 19547       | CakSNP19547    | <i>Kabuli</i>    | <i>Ca_Kabuli_denovo</i>      | 10313066                       | (G/A)       |
| 19548       | CakSNP19548    | <i>Kabuli</i>    | <i>Ca_Kabuli_denovo</i>      | 10313087                       | (A/G)       |
| 19549       | CakSNP19549    | <i>Kabuli</i>    | <i>Ca_Kabuli_denovo</i>      | 10313600                       | (T/C)       |
| 19550       | CakSNP19550    | <i>Kabuli</i>    | <i>Ca_Kabuli_denovo</i>      | 10320550                       | (G/C)       |
| 19551       | CakSNP19551    | <i>Kabuli</i>    | <i>Ca_Kabuli_denovo</i>      | 10320553                       | (C/T)       |
| 19552       | CakSNP19552    | <i>Kabuli</i>    | <i>Ca_Kabuli_denovo</i>      | 10321987                       | (T/A)       |
| 19553       | CakSNP19553    | <i>Kabuli</i>    | <i>Ca_Kabuli_denovo</i>      | 10322002                       | (T/C)       |
| 19554       | CakSNP19554    | <i>Kabuli</i>    | <i>Ca_Kabuli_denovo</i>      | 10324130                       | (C/G)       |
| 19555       | CakSNP19555    | <i>Kabuli</i>    | <i>Ca_Kabuli_denovo</i>      | 10324205                       | (G/C)       |
| 19556       | CakSNP19556    | <i>Kabuli</i>    | <i>Ca_Kabuli_denovo</i>      | 10328878                       | (T/C)       |
| 19557       | CakSNP19557    | <i>Kabuli</i>    | <i>Ca_Kabuli_denovo</i>      | 10329076                       | (C/T)       |
| 19558       | CakSNP19558    | <i>Kabuli</i>    | <i>Ca_Kabuli_denovo</i>      | 10332868                       | (G/A)       |
| 19559       | CakSNP19559    | <i>Kabuli</i>    | <i>Ca_Kabuli_denovo</i>      | 10336212                       | (C/T)       |
| 19560       | CakSNP19560    | <i>Kabuli</i>    | <i>Ca_Kabuli_denovo</i>      | 10336214                       | (C/T)       |
| 19561       | CakSNP19561    | <i>Kabuli</i>    | <i>Ca_Kabuli_denovo</i>      | 10336794                       | (G/C)       |
| 19562       | CakSNP19562    | <i>Kabuli</i>    | <i>Ca_Kabuli_denovo</i>      | 10339873                       | (C/T)       |
| 19563       | CakSNP19563    | <i>Kabuli</i>    | <i>Ca_Kabuli_denovo</i>      | 10340283                       | (T/C)       |
| 19564       | CakSNP19564    | <i>Kabuli</i>    | <i>Ca_Kabuli_denovo</i>      | 10349134                       | (G/T)       |
| 19565       | CakSNP19565    | <i>Kabuli</i>    | <i>Ca_Kabuli_denovo</i>      | 10352881                       | (A/C)       |
| 19566       | CakSNP19566    | <i>Kabuli</i>    | <i>Ca_Kabuli_denovo</i>      | 10352883                       | (A/G)       |
| 19567       | CakSNP19567    | <i>Kabuli</i>    | <i>Ca_Kabuli_denovo</i>      | 10359340                       | (T/G)       |
| 19568       | CakSNP19568    | <i>Kabuli</i>    | <i>Ca_Kabuli_denovo</i>      | 10362271                       | (C/T)       |
| 19569       | CakSNP19569    | <i>Kabuli</i>    | <i>Ca_Kabuli_denovo</i>      | 10362307                       | (A/C)       |
| 19570       | CakSNP19570    | <i>Kabuli</i>    | <i>Ca_Kabuli_denovo</i>      | 10371987                       | (T/G)       |
| 19571       | CakSNP19571    | <i>Kabuli</i>    | <i>Ca_Kabuli_denovo</i>      | 10382340                       | (G/C)       |
| 19572       | CakSNP19572    | <i>Kabuli</i>    | <i>Ca_Kabuli_denovo</i>      | 10382402                       | (T/C)       |
| 19573       | CakSNP19573    | <i>Kabuli</i>    | <i>Ca_Kabuli_denovo</i>      | 10386409                       | (C/T)       |
| 19574       | CakSNP19574    | <i>Kabuli</i>    | <i>Ca_Kabuli_denovo</i>      | 10387229                       | (G/A)       |
| 19575       | CakSNP19575    | <i>Kabuli</i>    | <i>Ca_Kabuli_denovo</i>      | 10388512                       | (A/G)       |
| 19576       | CakSNP19576    | <i>Kabuli</i>    | <i>Ca_Kabuli_denovo</i>      | 10389471                       | (G/A)       |

| <b>S.N.</b> | <b>SNP IDs</b> | <b>Cultivars</b> | <b>Chromosomes/scaffolds</b> | <b>Physical positions (bp)</b> | <b>SNPs</b> |
|-------------|----------------|------------------|------------------------------|--------------------------------|-------------|
| 19577       | CakSNP19577    | <i>Kabuli</i>    | <i>Ca_Kabuli_denovo</i>      | 10397284                       | (C/T)       |
| 19578       | CakSNP19578    | <i>Kabuli</i>    | <i>Ca_Kabuli_denovo</i>      | 10397306                       | (C/G)       |
| 19579       | CakSNP19579    | <i>Kabuli</i>    | <i>Ca_Kabuli_denovo</i>      | 10398136                       | (C/T)       |
| 19580       | CakSNP19580    | <i>Kabuli</i>    | <i>Ca_Kabuli_denovo</i>      | 10400788                       | (G/C)       |
| 19581       | CakSNP19581    | <i>Kabuli</i>    | <i>Ca_Kabuli_denovo</i>      | 10404768                       | (A/G)       |
| 19582       | CakSNP19582    | <i>Kabuli</i>    | <i>Ca_Kabuli_denovo</i>      | 10404818                       | (G/A)       |
| 19583       | CakSNP19583    | <i>Kabuli</i>    | <i>Ca_Kabuli_denovo</i>      | 10407328                       | (C/G)       |
| 19584       | CakSNP19584    | <i>Kabuli</i>    | <i>Ca_Kabuli_denovo</i>      | 10413612                       | (A/G)       |
| 19585       | CakSNP19585    | <i>Kabuli</i>    | <i>Ca_Kabuli_denovo</i>      | 10415506                       | (T/C)       |
| 19586       | CakSNP19586    | <i>Kabuli</i>    | <i>Ca_Kabuli_denovo</i>      | 10417123                       | (G/C)       |
| 19587       | CakSNP19587    | <i>Kabuli</i>    | <i>Ca_Kabuli_denovo</i>      | 10417126                       | (A/G)       |
| 19588       | CakSNP19588    | <i>Kabuli</i>    | <i>Ca_Kabuli_denovo</i>      | 10420396                       | (C/T)       |
| 19589       | CakSNP19589    | <i>Kabuli</i>    | <i>Ca_Kabuli_denovo</i>      | 10420453                       | (T/G)       |
| 19590       | CakSNP19590    | <i>Kabuli</i>    | <i>Ca_Kabuli_denovo</i>      | 10421757                       | (G/A)       |
| 19591       | CakSNP19591    | <i>Kabuli</i>    | <i>Ca_Kabuli_denovo</i>      | 10421896                       | (C/A)       |
| 19592       | CakSNP19592    | <i>Kabuli</i>    | <i>Ca_Kabuli_denovo</i>      | 10423550                       | (C/T)       |
| 19593       | CakSNP19593    | <i>Kabuli</i>    | <i>Ca_Kabuli_denovo</i>      | 10423580                       | (T/C)       |
| 19594       | CakSNP19594    | <i>Kabuli</i>    | <i>Ca_Kabuli_denovo</i>      | 10426889                       | (T/C)       |
| 19595       | CakSNP19595    | <i>Kabuli</i>    | <i>Ca_Kabuli_denovo</i>      | 10426931                       | (G/A)       |
| 19596       | CakSNP19596    | <i>Kabuli</i>    | <i>Ca_Kabuli_denovo</i>      | 10427834                       | (G/C)       |
| 19597       | CakSNP19597    | <i>Kabuli</i>    | <i>Ca_Kabuli_denovo</i>      | 10427835                       | (C/T)       |
| 19598       | CakSNP19598    | <i>Kabuli</i>    | <i>Ca_Kabuli_denovo</i>      | 10427855                       | (T/C)       |
| 19599       | CakSNP19599    | <i>Kabuli</i>    | <i>Ca_Kabuli_denovo</i>      | 10428671                       | (G/A)       |
| 19600       | CakSNP19600    | <i>Kabuli</i>    | <i>Ca_Kabuli_denovo</i>      | 10428677                       | (G/T)       |
| 19601       | CakSNP19601    | <i>Kabuli</i>    | <i>Ca_Kabuli_denovo</i>      | 10433563                       | (T/G)       |
| 19602       | CakSNP19602    | <i>Kabuli</i>    | <i>Ca_Kabuli_denovo</i>      | 10434056                       | (G/A)       |
| 19603       | CakSNP19603    | <i>Kabuli</i>    | <i>Ca_Kabuli_denovo</i>      | 10434071                       | (G/T)       |
| 19604       | CakSNP19604    | <i>Kabuli</i>    | <i>Ca_Kabuli_denovo</i>      | 10434715                       | (T/C)       |
| 19605       | CakSNP19605    | <i>Kabuli</i>    | <i>Ca_Kabuli_denovo</i>      | 10438263                       | (A/C)       |
| 19606       | CakSNP19606    | <i>Kabuli</i>    | <i>Ca_Kabuli_denovo</i>      | 10438309                       | (A/C)       |
| 19607       | CakSNP19607    | <i>Kabuli</i>    | <i>Ca_Kabuli_denovo</i>      | 10449585                       | (A/T)       |
| 19608       | CakSNP19608    | <i>Kabuli</i>    | <i>Ca_Kabuli_denovo</i>      | 10453372                       | (G/A)       |
| 19609       | CakSNP19609    | <i>Kabuli</i>    | <i>Ca_Kabuli_denovo</i>      | 10457782                       | (A/G)       |
| 19610       | CakSNP19610    | <i>Kabuli</i>    | <i>Ca_Kabuli_denovo</i>      | 10462185                       | (T/G)       |
| 19611       | CakSNP19611    | <i>Kabuli</i>    | <i>Ca_Kabuli_denovo</i>      | 10463932                       | (A/G)       |
| 19612       | CakSNP19612    | <i>Kabuli</i>    | <i>Ca_Kabuli_denovo</i>      | 10466745                       | (C/T)       |
| 19613       | CakSNP19613    | <i>Kabuli</i>    | <i>Ca_Kabuli_denovo</i>      | 10466768                       | (C/T)       |
| 19614       | CakSNP19614    | <i>Kabuli</i>    | <i>Ca_Kabuli_denovo</i>      | 10471964                       | (A/G)       |
| 19615       | CakSNP19615    | <i>Kabuli</i>    | <i>Ca_Kabuli_denovo</i>      | 10474267                       | (A/C)       |



| <b>S.N.</b> | <b>SNP IDs</b> | <b>Cultivars</b> | <b>Chromosomes/scaffolds</b> | <b>Physical positions (bp)</b> | <b>SNPs</b> |
|-------------|----------------|------------------|------------------------------|--------------------------------|-------------|
| 19616       | CakSNP19616    | <i>Kabuli</i>    | <i>Ca_Kabuli_denovo</i>      | 10474993                       | (G/A)       |
| 19617       | CakSNP19617    | <i>Kabuli</i>    | <i>Ca_Kabuli_denovo</i>      | 10475020                       | (C/G)       |
| 19618       | CakSNP19618    | <i>Kabuli</i>    | <i>Ca_Kabuli_denovo</i>      | 10476143                       | (A/C)       |
| 19619       | CakSNP19619    | <i>Kabuli</i>    | <i>Ca_Kabuli_denovo</i>      | 10478166                       | (G/A)       |
| 19620       | CakSNP19620    | <i>Kabuli</i>    | <i>Ca_Kabuli_denovo</i>      | 10478171                       | (C/T)       |
| 19621       | CakSNP19621    | <i>Kabuli</i>    | <i>Ca_Kabuli_denovo</i>      | 10480186                       | (G/A)       |
| 19622       | CakSNP19622    | <i>Kabuli</i>    | <i>Ca_Kabuli_denovo</i>      | 10480247                       | (G/A)       |
| 19623       | CakSNP19623    | <i>Kabuli</i>    | <i>Ca_Kabuli_denovo</i>      | 10480562                       | (A/G)       |
| 19624       | CakSNP19624    | <i>Kabuli</i>    | <i>Ca_Kabuli_denovo</i>      | 10487489                       | (C/T)       |
| 19625       | CakSNP19625    | <i>Kabuli</i>    | <i>Ca_Kabuli_denovo</i>      | 10487501                       | (C/T)       |
| 19626       | CakSNP19626    | <i>Kabuli</i>    | <i>Ca_Kabuli_denovo</i>      | 10487719                       | (C/A)       |
| 19627       | CakSNP19627    | <i>Kabuli</i>    | <i>Ca_Kabuli_denovo</i>      | 10488191                       | (G/A)       |
| 19628       | CakSNP19628    | <i>Kabuli</i>    | <i>Ca_Kabuli_denovo</i>      | 10488218                       | (T/C)       |
| 19629       | CakSNP19629    | <i>Kabuli</i>    | <i>Ca_Kabuli_denovo</i>      | 10490833                       | (T/G)       |
| 19630       | CakSNP19630    | <i>Kabuli</i>    | <i>Ca_Kabuli_denovo</i>      | 10490857                       | (C/T)       |
| 19631       | CakSNP19631    | <i>Kabuli</i>    | <i>Ca_Kabuli_denovo</i>      | 10491343                       | (G/A)       |
| 19632       | CakSNP19632    | <i>Kabuli</i>    | <i>Ca_Kabuli_denovo</i>      | 10491421                       | (A/C)       |
| 19633       | CakSNP19633    | <i>Kabuli</i>    | <i>Ca_Kabuli_denovo</i>      | 10504586                       | (T/A)       |
| 19634       | CakSNP19634    | <i>Kabuli</i>    | <i>Ca_Kabuli_denovo</i>      | 10509436                       | (C/T)       |
| 19635       | CakSNP19635    | <i>Kabuli</i>    | <i>Ca_Kabuli_denovo</i>      | 10520172                       | (A/G)       |
| 19636       | CakSNP19636    | <i>Kabuli</i>    | <i>Ca_Kabuli_denovo</i>      | 10521045                       | (C/T)       |
| 19637       | CakSNP19637    | <i>Kabuli</i>    | <i>Ca_Kabuli_denovo</i>      | 10522423                       | (C/T)       |
| 19638       | CakSNP19638    | <i>Kabuli</i>    | <i>Ca_Kabuli_denovo</i>      | 10526136                       | (T/C)       |
| 19639       | CakSNP19639    | <i>Kabuli</i>    | <i>Ca_Kabuli_denovo</i>      | 10526145                       | (C/T)       |
| 19640       | CakSNP19640    | <i>Kabuli</i>    | <i>Ca_Kabuli_denovo</i>      | 10527066                       | (C/A)       |
| 19641       | CakSNP19641    | <i>Kabuli</i>    | <i>Ca_Kabuli_denovo</i>      | 10528013                       | (A/G)       |
| 19642       | CakSNP19642    | <i>Kabuli</i>    | <i>Ca_Kabuli_denovo</i>      | 10538248                       | (G/A)       |
| 19643       | CakSNP19643    | <i>Kabuli</i>    | <i>Ca_Kabuli_denovo</i>      | 10544632                       | (A/G)       |
| 19644       | CakSNP19644    | <i>Kabuli</i>    | <i>Ca_Kabuli_denovo</i>      | 10546885                       | (A/G)       |
| 19645       | CakSNP19645    | <i>Kabuli</i>    | <i>Ca_Kabuli_denovo</i>      | 10555780                       | (C/A)       |
| 19646       | CakSNP19646    | <i>Kabuli</i>    | <i>Ca_Kabuli_denovo</i>      | 10558499                       | (C/T)       |
| 19647       | CakSNP19647    | <i>Kabuli</i>    | <i>Ca_Kabuli_denovo</i>      | 10558812                       | (T/C)       |
| 19648       | CakSNP19648    | <i>Kabuli</i>    | <i>Ca_Kabuli_denovo</i>      | 10559975                       | (A/G)       |
| 19649       | CakSNP19649    | <i>Kabuli</i>    | <i>Ca_Kabuli_denovo</i>      | 10563440                       | (G/A)       |
| 19650       | CakSNP19650    | <i>Kabuli</i>    | <i>Ca_Kabuli_denovo</i>      | 10566203                       | (C/G)       |
| 19651       | CakSNP19651    | <i>Kabuli</i>    | <i>Ca_Kabuli_denovo</i>      | 10580621                       | (G/A)       |
| 19652       | CakSNP19652    | <i>Kabuli</i>    | <i>Ca_Kabuli_denovo</i>      | 10583596                       | (G/A)       |
| 19653       | CakSNP19653    | <i>Kabuli</i>    | <i>Ca_Kabuli_denovo</i>      | 10586396                       | (G/A)       |
| 19654       | CakSNP19654    | <i>Kabuli</i>    | <i>Ca_Kabuli_denovo</i>      | 10586476                       | (A/G)       |

| <b>S.N.</b> | <b>SNP IDs</b> | <b>Cultivars</b> | <b>Chromosomes/scaffolds</b> | <b>Physical positions (bp)</b> | <b>SNPs</b> |
|-------------|----------------|------------------|------------------------------|--------------------------------|-------------|
| 19655       | CakSNP19655    | <i>Kabuli</i>    | <i>Ca_Kabuli_denovo</i>      | 10587347                       | (T/C)       |
| 19656       | CakSNP19656    | <i>Kabuli</i>    | <i>Ca_Kabuli_denovo</i>      | 10587505                       | (C/G)       |
| 19657       | CakSNP19657    | <i>Kabuli</i>    | <i>Ca_Kabuli_denovo</i>      | 10597388                       | (C/G)       |
| 19658       | CakSNP19658    | <i>Kabuli</i>    | <i>Ca_Kabuli_denovo</i>      | 10597948                       | (T/C)       |
| 19659       | CakSNP19659    | <i>Kabuli</i>    | <i>Ca_Kabuli_denovo</i>      | 10601860                       | (C/T)       |
| 19660       | CakSNP19660    | <i>Kabuli</i>    | <i>Ca_Kabuli_denovo</i>      | 10602584                       | (A/G)       |
| 19661       | CakSNP19661    | <i>Kabuli</i>    | <i>Ca_Kabuli_denovo</i>      | 10604019                       | (C/T)       |
| 19662       | CakSNP19662    | <i>Kabuli</i>    | <i>Ca_Kabuli_denovo</i>      | 10608370                       | (C/T)       |
| 19663       | CakSNP19663    | <i>Kabuli</i>    | <i>Ca_Kabuli_denovo</i>      | 10609543                       | (G/A)       |
| 19664       | CakSNP19664    | <i>Kabuli</i>    | <i>Ca_Kabuli_denovo</i>      | 10612490                       | (G/A)       |
| 19665       | CakSNP19665    | <i>Kabuli</i>    | <i>Ca_Kabuli_denovo</i>      | 10613546                       | (T/G)       |
| 19666       | CakSNP19666    | <i>Kabuli</i>    | <i>Ca_Kabuli_denovo</i>      | 10614294                       | (C/T)       |
| 19667       | CakSNP19667    | <i>Kabuli</i>    | <i>Ca_Kabuli_denovo</i>      | 10614905                       | (G/A)       |
| 19668       | CakSNP19668    | <i>Kabuli</i>    | <i>Ca_Kabuli_denovo</i>      | 10619587                       | (G/A)       |
| 19669       | CakSNP19669    | <i>Kabuli</i>    | <i>Ca_Kabuli_denovo</i>      | 10623248                       | (A/G)       |
| 19670       | CakSNP19670    | <i>Kabuli</i>    | <i>Ca_Kabuli_denovo</i>      | 10625948                       | (C/A)       |
| 19671       | CakSNP19671    | <i>Kabuli</i>    | <i>Ca_Kabuli_denovo</i>      | 10625976                       | (A/T)       |
| 19672       | CakSNP19672    | <i>Kabuli</i>    | <i>Ca_Kabuli_denovo</i>      | 10633747                       | (C/T)       |
| 19673       | CakSNP19673    | <i>Kabuli</i>    | <i>Ca_Kabuli_denovo</i>      | 10634473                       | (A/G)       |
| 19674       | CakSNP19674    | <i>Kabuli</i>    | <i>Ca_Kabuli_denovo</i>      | 10634539                       | (C/G)       |
| 19675       | CakSNP19675    | <i>Kabuli</i>    | <i>Ca_Kabuli_denovo</i>      | 10635906                       | (G/A)       |
| 19676       | CakSNP19676    | <i>Kabuli</i>    | <i>Ca_Kabuli_denovo</i>      | 10636722                       | (T/G)       |
| 19677       | CakSNP19677    | <i>Kabuli</i>    | <i>Ca_Kabuli_denovo</i>      | 10636753                       | (T/C)       |
| 19678       | CakSNP19678    | <i>Kabuli</i>    | <i>Ca_Kabuli_denovo</i>      | 10638379                       | (C/T)       |
| 19679       | CakSNP19679    | <i>Kabuli</i>    | <i>Ca_Kabuli_denovo</i>      | 10638416                       | (C/T)       |
| 19680       | CakSNP19680    | <i>Kabuli</i>    | <i>Ca_Kabuli_denovo</i>      | 10639123                       | (T/C)       |
| 19681       | CakSNP19681    | <i>Kabuli</i>    | <i>Ca_Kabuli_denovo</i>      | 10639199                       | (A/C)       |
| 19682       | CakSNP19682    | <i>Kabuli</i>    | <i>Ca_Kabuli_denovo</i>      | 10639200                       | (G/T)       |
| 19683       | CakSNP19683    | <i>Kabuli</i>    | <i>Ca_Kabuli_denovo</i>      | 10639201                       | (A/C)       |
| 19684       | CakSNP19684    | <i>Kabuli</i>    | <i>Ca_Kabuli_denovo</i>      | 10645075                       | (G/A)       |
| 19685       | CakSNP19685    | <i>Kabuli</i>    | <i>Ca_Kabuli_denovo</i>      | 10648894                       | (A/C)       |
| 19686       | CakSNP19686    | <i>Kabuli</i>    | <i>Ca_Kabuli_denovo</i>      | 10648964                       | (A/G)       |
| 19687       | CakSNP19687    | <i>Kabuli</i>    | <i>Ca_Kabuli_denovo</i>      | 10651838                       | (C/T)       |
| 19688       | CakSNP19688    | <i>Kabuli</i>    | <i>Ca_Kabuli_denovo</i>      | 10652481                       | (A/G)       |
| 19689       | CakSNP19689    | <i>Kabuli</i>    | <i>Ca_Kabuli_denovo</i>      | 10652486                       | (T/C)       |
| 19690       | CakSNP19690    | <i>Kabuli</i>    | <i>Ca_Kabuli_denovo</i>      | 10660520                       | (G/A)       |
| 19691       | CakSNP19691    | <i>Kabuli</i>    | <i>Ca_Kabuli_denovo</i>      | 10675025                       | (A/G)       |
| 19692       | CakSNP19692    | <i>Kabuli</i>    | <i>Ca_Kabuli_denovo</i>      | 10675052                       | (G/A)       |
| 19693       | CakSNP19693    | <i>Kabuli</i>    | <i>Ca_Kabuli_denovo</i>      | 10675879                       | (A/G)       |

| <b>S.N.</b> | <b>SNP IDs</b> | <b>Cultivars</b> | <b>Chromosomes/scaffolds</b> | <b>Physical positions (bp)</b> | <b>SNPs</b> |
|-------------|----------------|------------------|------------------------------|--------------------------------|-------------|
| 19694       | CakSNP19694    | <i>Kabuli</i>    | <i>Ca_Kabuli_denovo</i>      | 10682359                       | (A/G)       |
| 19695       | CakSNP19695    | <i>Kabuli</i>    | <i>Ca_Kabuli_denovo</i>      | 10685319                       | (T/A)       |
| 19696       | CakSNP19696    | <i>Kabuli</i>    | <i>Ca_Kabuli_denovo</i>      | 10690207                       | (C/A)       |
| 19697       | CakSNP19697    | <i>Kabuli</i>    | <i>Ca_Kabuli_denovo</i>      | 10690236                       | (T/C)       |
| 19698       | CakSNP19698    | <i>Kabuli</i>    | <i>Ca_Kabuli_denovo</i>      | 10704771                       | (C/T)       |
| 19699       | CakSNP19699    | <i>Kabuli</i>    | <i>Ca_Kabuli_denovo</i>      | 10704772                       | (C/T)       |
| 19700       | CakSNP19700    | <i>Kabuli</i>    | <i>Ca_Kabuli_denovo</i>      | 10709211                       | (G/A)       |
| 19701       | CakSNP19701    | <i>Kabuli</i>    | <i>Ca_Kabuli_denovo</i>      | 10709212                       | (C/T)       |
| 19702       | CakSNP19702    | <i>Kabuli</i>    | <i>Ca_Kabuli_denovo</i>      | 10711513                       | (C/T)       |
| 19703       | CakSNP19703    | <i>Kabuli</i>    | <i>Ca_Kabuli_denovo</i>      | 10717240                       | (C/T)       |
| 19704       | CakSNP19704    | <i>Kabuli</i>    | <i>Ca_Kabuli_denovo</i>      | 10725261                       | (T/C)       |
| 19705       | CakSNP19705    | <i>Kabuli</i>    | <i>Ca_Kabuli_denovo</i>      | 10725280                       | (A/G)       |
| 19706       | CakSNP19706    | <i>Kabuli</i>    | <i>Ca_Kabuli_denovo</i>      | 10726837                       | (T/G)       |
| 19707       | CakSNP19707    | <i>Kabuli</i>    | <i>Ca_Kabuli_denovo</i>      | 10726857                       | (A/G)       |
| 19708       | CakSNP19708    | <i>Kabuli</i>    | <i>Ca_Kabuli_denovo</i>      | 10727523                       | (C/T)       |
| 19709       | CakSNP19709    | <i>Kabuli</i>    | <i>Ca_Kabuli_denovo</i>      | 10737510                       | (A/C)       |
| 19710       | CakSNP19710    | <i>Kabuli</i>    | <i>Ca_Kabuli_denovo</i>      | 10737559                       | (A/G)       |
| 19711       | CakSNP19711    | <i>Kabuli</i>    | <i>Ca_Kabuli_denovo</i>      | 10744775                       | (G/A)       |
| 19712       | CakSNP19712    | <i>Kabuli</i>    | <i>Ca_Kabuli_denovo</i>      | 10748089                       | (T/C)       |
| 19713       | CakSNP19713    | <i>Kabuli</i>    | <i>Ca_Kabuli_denovo</i>      | 10748469                       | (T/G)       |
| 19714       | CakSNP19714    | <i>Kabuli</i>    | <i>Ca_Kabuli_denovo</i>      | 10750888                       | (A/G)       |
| 19715       | CakSNP19715    | <i>Kabuli</i>    | <i>Ca_Kabuli_denovo</i>      | 10750911                       | (T/C)       |
| 19716       | CakSNP19716    | <i>Kabuli</i>    | <i>Ca_Kabuli_denovo</i>      | 10750941                       | (G/A)       |
| 19717       | CakSNP19717    | <i>Kabuli</i>    | <i>Ca_Kabuli_denovo</i>      | 10765332                       | (C/T)       |
| 19718       | CakSNP19718    | <i>Kabuli</i>    | <i>Ca_Kabuli_denovo</i>      | 10774154                       | (C/A)       |
| 19719       | CakSNP19719    | <i>Kabuli</i>    | <i>Ca_Kabuli_denovo</i>      | 10774193                       | (A/G)       |
| 19720       | CakSNP19720    | <i>Kabuli</i>    | <i>Ca_Kabuli_denovo</i>      | 10779799                       | (C/G)       |
| 19721       | CakSNP19721    | <i>Kabuli</i>    | <i>Ca_Kabuli_denovo</i>      | 10779817                       | (C/T)       |
| 19722       | CakSNP19722    | <i>Kabuli</i>    | <i>Ca_Kabuli_denovo</i>      | 10784206                       | (C/G)       |
| 19723       | CakSNP19723    | <i>Kabuli</i>    | <i>Ca_Kabuli_denovo</i>      | 10785716                       | (C/G)       |
| 19724       | CakSNP19724    | <i>Kabuli</i>    | <i>Ca_Kabuli_denovo</i>      | 10793538                       | (C/T)       |
| 19725       | CakSNP19725    | <i>Kabuli</i>    | <i>Ca_Kabuli_denovo</i>      | 10801968                       | (C/G)       |
| 19726       | CakSNP19726    | <i>Kabuli</i>    | <i>Ca_Kabuli_denovo</i>      | 10802297                       | (T/C)       |
| 19727       | CakSNP19727    | <i>Kabuli</i>    | <i>Ca_Kabuli_denovo</i>      | 10802312                       | (A/G)       |
| 19728       | CakSNP19728    | <i>Kabuli</i>    | <i>Ca_Kabuli_denovo</i>      | 10804689                       | (A/C)       |
| 19729       | CakSNP19729    | <i>Kabuli</i>    | <i>Ca_Kabuli_denovo</i>      | 10804725                       | (A/C)       |
| 19730       | CakSNP19730    | <i>Kabuli</i>    | <i>Ca_Kabuli_denovo</i>      | 10815305                       | (C/T)       |
| 19731       | CakSNP19731    | <i>Kabuli</i>    | <i>Ca_Kabuli_denovo</i>      | 10816024                       | (A/G)       |
| 19732       | CakSNP19732    | <i>Kabuli</i>    | <i>Ca_Kabuli_denovo</i>      | 10820299                       | (T/C)       |

| <b>S.N.</b> | <b>SNP IDs</b> | <b>Cultivars</b> | <b>Chromosomes/scaffolds</b> | <b>Physical positions (bp)</b> | <b>SNPs</b> |
|-------------|----------------|------------------|------------------------------|--------------------------------|-------------|
| 19733       | CakSNP19733    | <i>Kabuli</i>    | <i>Ca_Kabuli_denovo</i>      | 10820305                       | (T/G)       |
| 19734       | CakSNP19734    | <i>Kabuli</i>    | <i>Ca_Kabuli_denovo</i>      | 10827752                       | (T/C)       |
| 19735       | CakSNP19735    | <i>Kabuli</i>    | <i>Ca_Kabuli_denovo</i>      | 10827766                       | (C/G)       |
| 19736       | CakSNP19736    | <i>Kabuli</i>    | <i>Ca_Kabuli_denovo</i>      | 10829958                       | (G/C)       |
| 19737       | CakSNP19737    | <i>Kabuli</i>    | <i>Ca_Kabuli_denovo</i>      | 10830004                       | (C/T)       |
| 19738       | CakSNP19738    | <i>Kabuli</i>    | <i>Ca_Kabuli_denovo</i>      | 10836808                       | (T/G)       |
| 19739       | CakSNP19739    | <i>Kabuli</i>    | <i>Ca_Kabuli_denovo</i>      | 10837882                       | (A/G)       |
| 19740       | CakSNP19740    | <i>Kabuli</i>    | <i>Ca_Kabuli_denovo</i>      | 10837892                       | (A/C)       |
| 19741       | CakSNP19741    | <i>Kabuli</i>    | <i>Ca_Kabuli_denovo</i>      | 10843751                       | (G/A)       |
| 19742       | CakSNP19742    | <i>Kabuli</i>    | <i>Ca_Kabuli_denovo</i>      | 10852994                       | (G/T)       |
| 19743       | CakSNP19743    | <i>Kabuli</i>    | <i>Ca_Kabuli_denovo</i>      | 10853440                       | (C/A)       |
| 19744       | CakSNP19744    | <i>Kabuli</i>    | <i>Ca_Kabuli_denovo</i>      | 10855184                       | (A/C)       |
| 19745       | CakSNP19745    | <i>Kabuli</i>    | <i>Ca_Kabuli_denovo</i>      | 10859383                       | (A/G)       |
| 19746       | CakSNP19746    | <i>Kabuli</i>    | <i>Ca_Kabuli_denovo</i>      | 10859422                       | (C/T)       |
| 19747       | CakSNP19747    | <i>Kabuli</i>    | <i>Ca_Kabuli_denovo</i>      | 10863716                       | (A/C)       |
| 19748       | CakSNP19748    | <i>Kabuli</i>    | <i>Ca_Kabuli_denovo</i>      | 10863767                       | (C/T)       |
| 19749       | CakSNP19749    | <i>Kabuli</i>    | <i>Ca_Kabuli_denovo</i>      | 10867451                       | (C/A)       |
| 19750       | CakSNP19750    | <i>Kabuli</i>    | <i>Ca_Kabuli_denovo</i>      | 10868177                       | (C/T)       |
| 19751       | CakSNP19751    | <i>Kabuli</i>    | <i>Ca_Kabuli_denovo</i>      | 10871629                       | (C/T)       |
| 19752       | CakSNP19752    | <i>Kabuli</i>    | <i>Ca_Kabuli_denovo</i>      | 10871630                       | (G/A)       |
| 19753       | CakSNP19753    | <i>Kabuli</i>    | <i>Ca_Kabuli_denovo</i>      | 10872857                       | (C/A)       |
| 19754       | CakSNP19754    | <i>Kabuli</i>    | <i>Ca_Kabuli_denovo</i>      | 10872867                       | (T/G)       |
| 19755       | CakSNP19755    | <i>Kabuli</i>    | <i>Ca_Kabuli_denovo</i>      | 10873672                       | (G/C)       |
| 19756       | CakSNP19756    | <i>Kabuli</i>    | <i>Ca_Kabuli_denovo</i>      | 10879509                       | (A/G)       |
| 19757       | CakSNP19757    | <i>Kabuli</i>    | <i>Ca_Kabuli_denovo</i>      | 10880917                       | (G/C)       |
| 19758       | CakSNP19758    | <i>Kabuli</i>    | <i>Ca_Kabuli_denovo</i>      | 10882337                       | (C/G)       |
| 19759       | CakSNP19759    | <i>Kabuli</i>    | <i>Ca_Kabuli_denovo</i>      | 10884357                       | (A/G)       |
| 19760       | CakSNP19760    | <i>Kabuli</i>    | <i>Ca_Kabuli_denovo</i>      | 10884407                       | (A/T)       |
| 19761       | CakSNP19761    | <i>Kabuli</i>    | <i>Ca_Kabuli_denovo</i>      | 10894351                       | (C/A)       |
| 19762       | CakSNP19762    | <i>Kabuli</i>    | <i>Ca_Kabuli_denovo</i>      | 10894895                       | (A/G)       |
| 19763       | CakSNP19763    | <i>Kabuli</i>    | <i>Ca_Kabuli_denovo</i>      | 10894913                       | (T/C)       |
| 19764       | CakSNP19764    | <i>Kabuli</i>    | <i>Ca_Kabuli_denovo</i>      | 10897663                       | (C/T)       |
| 19765       | CakSNP19765    | <i>Kabuli</i>    | <i>Ca_Kabuli_denovo</i>      | 10905659                       | (A/G)       |
| 19766       | CakSNP19766    | <i>Kabuli</i>    | <i>Ca_Kabuli_denovo</i>      | 10929918                       | (A/T)       |
| 19767       | CakSNP19767    | <i>Kabuli</i>    | <i>Ca_Kabuli_denovo</i>      | 10930163                       | (G/T)       |
| 19768       | CakSNP19768    | <i>Kabuli</i>    | <i>Ca_Kabuli_denovo</i>      | 10935880                       | (C/T)       |
| 19769       | CakSNP19769    | <i>Kabuli</i>    | <i>Ca_Kabuli_denovo</i>      | 10935937                       | (A/C)       |
| 19770       | CakSNP19770    | <i>Kabuli</i>    | <i>Ca_Kabuli_denovo</i>      | 10936993                       | (A/G)       |
| 19771       | CakSNP19771    | <i>Kabuli</i>    | <i>Ca_Kabuli_denovo</i>      | 10942394                       | (A/G)       |

| <b>S.N.</b> | <b>SNP IDs</b> | <b>Cultivars</b> | <b>Chromosomes/scaffolds</b> | <b>Physical positions (bp)</b> | <b>SNPs</b> |
|-------------|----------------|------------------|------------------------------|--------------------------------|-------------|
| 19772       | CakSNP19772    | <i>Kabuli</i>    | <i>Ca_Kabuli_denovo</i>      | 10942431                       | (A/G)       |
| 19773       | CakSNP19773    | <i>Kabuli</i>    | <i>Ca_Kabuli_denovo</i>      | 10943375                       | (T/C)       |
| 19774       | CakSNP19774    | <i>Kabuli</i>    | <i>Ca_Kabuli_denovo</i>      | 10943443                       | (C/T)       |
| 19775       | CakSNP19775    | <i>Kabuli</i>    | <i>Ca_Kabuli_denovo</i>      | 10945287                       | (G/A)       |
| 19776       | CakSNP19776    | <i>Kabuli</i>    | <i>Ca_Kabuli_denovo</i>      | 10945318                       | (G/C)       |
| 19777       | CakSNP19777    | <i>Kabuli</i>    | <i>Ca_Kabuli_denovo</i>      | 10951393                       | (G/T)       |
| 19778       | CakSNP19778    | <i>Kabuli</i>    | <i>Ca_Kabuli_denovo</i>      | 10951395                       | (A/G)       |
| 19779       | CakSNP19779    | <i>Kabuli</i>    | <i>Ca_Kabuli_denovo</i>      | 10957310                       | (C/T)       |
| 19780       | CakSNP19780    | <i>Kabuli</i>    | <i>Ca_Kabuli_denovo</i>      | 10958307                       | (C/T)       |
| 19781       | CakSNP19781    | <i>Kabuli</i>    | <i>Ca_Kabuli_denovo</i>      | 10958312                       | (C/A)       |
| 19782       | CakSNP19782    | <i>Kabuli</i>    | <i>Ca_Kabuli_denovo</i>      | 10959965                       | (C/G)       |
| 19783       | CakSNP19783    | <i>Kabuli</i>    | <i>Ca_Kabuli_denovo</i>      | 10960754                       | (G/A)       |
| 19784       | CakSNP19784    | <i>Kabuli</i>    | <i>Ca_Kabuli_denovo</i>      | 10964203                       | (C/T)       |
| 19785       | CakSNP19785    | <i>Kabuli</i>    | <i>Ca_Kabuli_denovo</i>      | 10964227                       | (G/A)       |
| 19786       | CakSNP19786    | <i>Kabuli</i>    | <i>Ca_Kabuli_denovo</i>      | 10971033                       | (G/A)       |
| 19787       | CakSNP19787    | <i>Kabuli</i>    | <i>Ca_Kabuli_denovo</i>      | 10971053                       | (G/C)       |
| 19788       | CakSNP19788    | <i>Kabuli</i>    | <i>Ca_Kabuli_denovo</i>      | 10977079                       | (A/C)       |
| 19789       | CakSNP19789    | <i>Kabuli</i>    | <i>Ca_Kabuli_denovo</i>      | 10978239                       | (A/G)       |
| 19790       | CakSNP19790    | <i>Kabuli</i>    | <i>Ca_Kabuli_denovo</i>      | 10978244                       | (G/A)       |
| 19791       | CakSNP19791    | <i>Kabuli</i>    | <i>Ca_Kabuli_denovo</i>      | 10978256                       | (C/G)       |
| 19792       | CakSNP19792    | <i>Kabuli</i>    | <i>Ca_Kabuli_denovo</i>      | 10985386                       | (T/C)       |
| 19793       | CakSNP19793    | <i>Kabuli</i>    | <i>Ca_Kabuli_denovo</i>      | 10985566                       | (A/G)       |
| 19794       | CakSNP19794    | <i>Kabuli</i>    | <i>Ca_Kabuli_denovo</i>      | 10985567                       | (T/C)       |
| 19795       | CakSNP19795    | <i>Kabuli</i>    | <i>Ca_Kabuli_denovo</i>      | 10986704                       | (C/G)       |
| 19796       | CakSNP19796    | <i>Kabuli</i>    | <i>Ca_Kabuli_denovo</i>      | 10986710                       | (C/G)       |
| 19797       | CakSNP19797    | <i>Kabuli</i>    | <i>Ca_Kabuli_denovo</i>      | 10987146                       | (T/G)       |
| 19798       | CakSNP19798    | <i>Kabuli</i>    | <i>Ca_Kabuli_denovo</i>      | 10987152                       | (T/A)       |
| 19799       | CakSNP19799    | <i>Kabuli</i>    | <i>Ca_Kabuli_denovo</i>      | 10989989                       | (T/G)       |
| 19800       | CakSNP19800    | <i>Kabuli</i>    | <i>Ca_Kabuli_denovo</i>      | 10994002                       | (C/T)       |
| 19801       | CakSNP19801    | <i>Kabuli</i>    | <i>Ca_Kabuli_denovo</i>      | 10994032                       | (T/C)       |
| 19802       | CakSNP19802    | <i>Kabuli</i>    | <i>Ca_Kabuli_denovo</i>      | 10996772                       | (C/T)       |
| 19803       | CakSNP19803    | <i>Kabuli</i>    | <i>Ca_Kabuli_denovo</i>      | 11000849                       | (G/C)       |
| 19804       | CakSNP19804    | <i>Kabuli</i>    | <i>Ca_Kabuli_denovo</i>      | 11000856                       | (C/G)       |
| 19805       | CakSNP19805    | <i>Kabuli</i>    | <i>Ca_Kabuli_denovo</i>      | 11009676                       | (C/T)       |
| 19806       | CakSNP19806    | <i>Kabuli</i>    | <i>Ca_Kabuli_denovo</i>      | 11015742                       | (G/A)       |
| 19807       | CakSNP19807    | <i>Kabuli</i>    | <i>Ca_Kabuli_denovo</i>      | 11018664                       | (C/A)       |
| 19808       | CakSNP19808    | <i>Kabuli</i>    | <i>Ca_Kabuli_denovo</i>      | 11018718                       | (C/G)       |
| 19809       | CakSNP19809    | <i>Kabuli</i>    | <i>Ca_Kabuli_denovo</i>      | 11022673                       | (C/G)       |
| 19810       | CakSNP19810    | <i>Kabuli</i>    | <i>Ca_Kabuli_denovo</i>      | 11022685                       | (T/C)       |

| <b>S.N.</b> | <b>SNP IDs</b> | <b>Cultivars</b> | <b>Chromosomes/scaffolds</b> | <b>Physical positions (bp)</b> | <b>SNPs</b> |
|-------------|----------------|------------------|------------------------------|--------------------------------|-------------|
| 19811       | CakSNP19811    | <i>Kabuli</i>    | <i>Ca_Kabuli_denovo</i>      | 11022766                       | (C/T)       |
| 19812       | CakSNP19812    | <i>Kabuli</i>    | <i>Ca_Kabuli_denovo</i>      | 11025360                       | (A/C)       |
| 19813       | CakSNP19813    | <i>Kabuli</i>    | <i>Ca_Kabuli_denovo</i>      | 11025765                       | (C/G)       |
| 19814       | CakSNP19814    | <i>Kabuli</i>    | <i>Ca_Kabuli_denovo</i>      | 11035425                       | (C/T)       |
| 19815       | CakSNP19815    | <i>Kabuli</i>    | <i>Ca_Kabuli_denovo</i>      | 11035455                       | (C/G)       |
| 19816       | CakSNP19816    | <i>Kabuli</i>    | <i>Ca_Kabuli_denovo</i>      | 11038835                       | (C/G)       |
| 19817       | CakSNP19817    | <i>Kabuli</i>    | <i>Ca_Kabuli_denovo</i>      | 11038859                       | (T/C)       |
| 19818       | CakSNP19818    | <i>Kabuli</i>    | <i>Ca_Kabuli_denovo</i>      | 11041618                       | (G/A)       |
| 19819       | CakSNP19819    | <i>Kabuli</i>    | <i>Ca_Kabuli_denovo</i>      | 11041631                       | (A/G)       |
| 19820       | CakSNP19820    | <i>Kabuli</i>    | <i>Ca_Kabuli_denovo</i>      | 11049997                       | (A/G)       |
| 19821       | CakSNP19821    | <i>Kabuli</i>    | <i>Ca_Kabuli_denovo</i>      | 11050024                       | (G/A)       |
| 19822       | CakSNP19822    | <i>Kabuli</i>    | <i>Ca_Kabuli_denovo</i>      | 11052623                       | (T/G)       |
| 19823       | CakSNP19823    | <i>Kabuli</i>    | <i>Ca_Kabuli_denovo</i>      | 11052626                       | (T/C)       |
| 19824       | CakSNP19824    | <i>Kabuli</i>    | <i>Ca_Kabuli_denovo</i>      | 11059845                       | (G/A)       |
| 19825       | CakSNP19825    | <i>Kabuli</i>    | <i>Ca_Kabuli_denovo</i>      | 11060901                       | (G/C)       |
| 19826       | CakSNP19826    | <i>Kabuli</i>    | <i>Ca_Kabuli_denovo</i>      | 11063106                       | (T/A)       |
| 19827       | CakSNP19827    | <i>Kabuli</i>    | <i>Ca_Kabuli_denovo</i>      | 11078845                       | (G/C)       |
| 19828       | CakSNP19828    | <i>Kabuli</i>    | <i>Ca_Kabuli_denovo</i>      | 11081534                       | (T/C)       |
| 19829       | CakSNP19829    | <i>Kabuli</i>    | <i>Ca_Kabuli_denovo</i>      | 11081662                       | (C/T)       |
| 19830       | CakSNP19830    | <i>Kabuli</i>    | <i>Ca_Kabuli_denovo</i>      | 11083492                       | (G/A)       |
| 19831       | CakSNP19831    | <i>Kabuli</i>    | <i>Ca_Kabuli_denovo</i>      | 11083548                       | (G/A)       |
| 19832       | CakSNP19832    | <i>Kabuli</i>    | <i>Ca_Kabuli_denovo</i>      | 11086369                       | (G/A)       |
| 19833       | CakSNP19833    | <i>Kabuli</i>    | <i>Ca_Kabuli_denovo</i>      | 11099095                       | (G/A)       |
| 19834       | CakSNP19834    | <i>Kabuli</i>    | <i>Ca_Kabuli_denovo</i>      | 11101450                       | (A/G)       |
| 19835       | CakSNP19835    | <i>Kabuli</i>    | <i>Ca_Kabuli_denovo</i>      | 11101462                       | (T/C)       |
| 19836       | CakSNP19836    | <i>Kabuli</i>    | <i>Ca_Kabuli_denovo</i>      | 11114537                       | (G/C)       |
| 19837       | CakSNP19837    | <i>Kabuli</i>    | <i>Ca_Kabuli_denovo</i>      | 11116590                       | (A/G)       |
| 19838       | CakSNP19838    | <i>Kabuli</i>    | <i>Ca_Kabuli_denovo</i>      | 11116620                       | (T/C)       |
| 19839       | CakSNP19839    | <i>Kabuli</i>    | <i>Ca_Kabuli_denovo</i>      | 11117655                       | (A/C)       |
| 19840       | CakSNP19840    | <i>Kabuli</i>    | <i>Ca_Kabuli_denovo</i>      | 11127124                       | (T/C)       |
| 19841       | CakSNP19841    | <i>Kabuli</i>    | <i>Ca_Kabuli_denovo</i>      | 11129839                       | (G/A)       |
| 19842       | CakSNP19842    | <i>Kabuli</i>    | <i>Ca_Kabuli_denovo</i>      | 11132036                       | (G/C)       |
| 19843       | CakSNP19843    | <i>Kabuli</i>    | <i>Ca_Kabuli_denovo</i>      | 11136790                       | (A/G)       |
| 19844       | CakSNP19844    | <i>Kabuli</i>    | <i>Ca_Kabuli_denovo</i>      | 11136841                       | (C/T)       |
| 19845       | CakSNP19845    | <i>Kabuli</i>    | <i>Ca_Kabuli_denovo</i>      | 11137317                       | (G/A)       |
| 19846       | CakSNP19846    | <i>Kabuli</i>    | <i>Ca_Kabuli_denovo</i>      | 11137921                       | (G/T)       |
| 19847       | CakSNP19847    | <i>Kabuli</i>    | <i>Ca_Kabuli_denovo</i>      | 11143568                       | (A/G)       |
| 19848       | CakSNP19848    | <i>Kabuli</i>    | <i>Ca_Kabuli_denovo</i>      | 11144773                       | (A/G)       |
| 19849       | CakSNP19849    | <i>Kabuli</i>    | <i>Ca_Kabuli_denovo</i>      | 11144842                       | (A/C)       |

| <b>S.N.</b> | <b>SNP IDs</b> | <b>Cultivars</b> | <b>Chromosomes/scaffolds</b> | <b>Physical positions (bp)</b> | <b>SNPs</b> |
|-------------|----------------|------------------|------------------------------|--------------------------------|-------------|
| 19850       | CakSNP19850    | <i>Kabuli</i>    | <i>Ca_Kabuli_denovo</i>      | 11146079                       | (C/A)       |
| 19851       | CakSNP19851    | <i>Kabuli</i>    | <i>Ca_Kabuli_denovo</i>      | 11161889                       | (G/T)       |
| 19852       | CakSNP19852    | <i>Kabuli</i>    | <i>Ca_Kabuli_denovo</i>      | 11162483                       | (G/T)       |
| 19853       | CakSNP19853    | <i>Kabuli</i>    | <i>Ca_Kabuli_denovo</i>      | 11162500                       | (A/G)       |
| 19854       | CakSNP19854    | <i>Kabuli</i>    | <i>Ca_Kabuli_denovo</i>      | 11165328                       | (A/G)       |
| 19855       | CakSNP19855    | <i>Kabuli</i>    | <i>Ca_Kabuli_denovo</i>      | 11165347                       | (A/C)       |
| 19856       | CakSNP19856    | <i>Kabuli</i>    | <i>Ca_Kabuli_denovo</i>      | 11171823                       | (G/T)       |
| 19857       | CakSNP19857    | <i>Kabuli</i>    | <i>Ca_Kabuli_denovo</i>      | 11172625                       | (A/G)       |
| 19858       | CakSNP19858    | <i>Kabuli</i>    | <i>Ca_Kabuli_denovo</i>      | 11172634                       | (A/G)       |
| 19859       | CakSNP19859    | <i>Kabuli</i>    | <i>Ca_Kabuli_denovo</i>      | 11174544                       | (G/T)       |
| 19860       | CakSNP19860    | <i>Kabuli</i>    | <i>Ca_Kabuli_denovo</i>      | 11174567                       | (A/G)       |
| 19861       | CakSNP19861    | <i>Kabuli</i>    | <i>Ca_Kabuli_denovo</i>      | 11177330                       | (C/G)       |
| 19862       | CakSNP19862    | <i>Kabuli</i>    | <i>Ca_Kabuli_denovo</i>      | 11185106                       | (C/G)       |
| 19863       | CakSNP19863    | <i>Kabuli</i>    | <i>Ca_Kabuli_denovo</i>      | 11188583                       | (G/C)       |
| 19864       | CakSNP19864    | <i>Kabuli</i>    | <i>Ca_Kabuli_denovo</i>      | 11193535                       | (C/G)       |
| 19865       | CakSNP19865    | <i>Kabuli</i>    | <i>Ca_Kabuli_denovo</i>      | 11193573                       | (G/A)       |
| 19866       | CakSNP19866    | <i>Kabuli</i>    | <i>Ca_Kabuli_denovo</i>      | 11195851                       | (G/T)       |
| 19867       | CakSNP19867    | <i>Kabuli</i>    | <i>Ca_Kabuli_denovo</i>      | 11204126                       | (C/T)       |
| 19868       | CakSNP19868    | <i>Kabuli</i>    | <i>Ca_Kabuli_denovo</i>      | 11204171                       | (A/C)       |
| 19869       | CakSNP19869    | <i>Kabuli</i>    | <i>Ca_Kabuli_denovo</i>      | 11205211                       | (G/A)       |
| 19870       | CakSNP19870    | <i>Kabuli</i>    | <i>Ca_Kabuli_denovo</i>      | 11205220                       | (C/A)       |
| 19871       | CakSNP19871    | <i>Kabuli</i>    | <i>Ca_Kabuli_denovo</i>      | 11205976                       | (A/G)       |
| 19872       | CakSNP19872    | <i>Kabuli</i>    | <i>Ca_Kabuli_denovo</i>      | 11205991                       | (C/T)       |
| 19873       | CakSNP19873    | <i>Kabuli</i>    | <i>Ca_Kabuli_denovo</i>      | 11207799                       | (T/C)       |
| 19874       | CakSNP19874    | <i>Kabuli</i>    | <i>Ca_Kabuli_denovo</i>      | 11210096                       | (T/C)       |
| 19875       | CakSNP19875    | <i>Kabuli</i>    | <i>Ca_Kabuli_denovo</i>      | 11212029                       | (T/C)       |
| 19876       | CakSNP19876    | <i>Kabuli</i>    | <i>Ca_Kabuli_denovo</i>      | 11212077                       | (A/G)       |
| 19877       | CakSNP19877    | <i>Kabuli</i>    | <i>Ca_Kabuli_denovo</i>      | 11212273                       | (G/C)       |
| 19878       | CakSNP19878    | <i>Kabuli</i>    | <i>Ca_Kabuli_denovo</i>      | 11212276                       | (A/G)       |
| 19879       | CakSNP19879    | <i>Kabuli</i>    | <i>Ca_Kabuli_denovo</i>      | 11226427                       | (A/G)       |
| 19880       | CakSNP19880    | <i>Kabuli</i>    | <i>Ca_Kabuli_denovo</i>      | 11226478                       | (C/G)       |
| 19881       | CakSNP19881    | <i>Kabuli</i>    | <i>Ca_Kabuli_denovo</i>      | 11232178                       | (C/A)       |
| 19882       | CakSNP19882    | <i>Kabuli</i>    | <i>Ca_Kabuli_denovo</i>      | 11232208                       | (T/C)       |
| 19883       | CakSNP19883    | <i>Kabuli</i>    | <i>Ca_Kabuli_denovo</i>      | 11235535                       | (T/C)       |
| 19884       | CakSNP19884    | <i>Kabuli</i>    | <i>Ca_Kabuli_denovo</i>      | 11238073                       | (G/A)       |
| 19885       | CakSNP19885    | <i>Kabuli</i>    | <i>Ca_Kabuli_denovo</i>      | 11238076                       | (C/G)       |
| 19886       | CakSNP19886    | <i>Kabuli</i>    | <i>Ca_Kabuli_denovo</i>      | 11243846                       | (C/T)       |
| 19887       | CakSNP19887    | <i>Kabuli</i>    | <i>Ca_Kabuli_denovo</i>      | 11247995                       | (G/A)       |
| 19888       | CakSNP19888    | <i>Kabuli</i>    | <i>Ca_Kabuli_denovo</i>      | 11251636                       | (A/G)       |

| <b>S.N.</b> | <b>SNP IDs</b> | <b>Cultivars</b> | <b>Chromosomes/scaffolds</b> | <b>Physical positions (bp)</b> | <b>SNPs</b> |
|-------------|----------------|------------------|------------------------------|--------------------------------|-------------|
| 19889       | CakSNP19889    | <i>Kabuli</i>    | <i>Ca_Kabuli_denovo</i>      | 11253863                       | (C/T)       |
| 19890       | CakSNP19890    | <i>Kabuli</i>    | <i>Ca_Kabuli_denovo</i>      | 11253937                       | (C/T)       |
| 19891       | CakSNP19891    | <i>Kabuli</i>    | <i>Ca_Kabuli_denovo</i>      | 11253941                       | (G/T)       |
| 19892       | CakSNP19892    | <i>Kabuli</i>    | <i>Ca_Kabuli_denovo</i>      | 11254529                       | (C/A)       |
| 19893       | CakSNP19893    | <i>Kabuli</i>    | <i>Ca_Kabuli_denovo</i>      | 11254535                       | (G/C)       |
| 19894       | CakSNP19894    | <i>Kabuli</i>    | <i>Ca_Kabuli_denovo</i>      | 11257861                       | (A/G)       |
| 19895       | CakSNP19895    | <i>Kabuli</i>    | <i>Ca_Kabuli_denovo</i>      | 11257890                       | (T/C)       |
| 19896       | CakSNP19896    | <i>Kabuli</i>    | <i>Ca_Kabuli_denovo</i>      | 11260640                       | (C/T)       |
| 19897       | CakSNP19897    | <i>Kabuli</i>    | <i>Ca_Kabuli_denovo</i>      | 11261285                       | (T/G)       |
| 19898       | CakSNP19898    | <i>Kabuli</i>    | <i>Ca_Kabuli_denovo</i>      | 11263910                       | (C/T)       |
| 19899       | CakSNP19899    | <i>Kabuli</i>    | <i>Ca_Kabuli_denovo</i>      | 11264488                       | (A/G)       |
| 19900       | CakSNP19900    | <i>Kabuli</i>    | <i>Ca_Kabuli_denovo</i>      | 11266340                       | (C/G)       |
| 19901       | CakSNP19901    | <i>Kabuli</i>    | <i>Ca_Kabuli_denovo</i>      | 11268597                       | (A/G)       |
| 19902       | CakSNP19902    | <i>Kabuli</i>    | <i>Ca_Kabuli_denovo</i>      | 11269385                       | (C/A)       |
| 19903       | CakSNP19903    | <i>Kabuli</i>    | <i>Ca_Kabuli_denovo</i>      | 11274782                       | (G/A)       |
| 19904       | CakSNP19904    | <i>Kabuli</i>    | <i>Ca_Kabuli_denovo</i>      | 11274830                       | (A/G)       |
| 19905       | CakSNP19905    | <i>Kabuli</i>    | <i>Ca_Kabuli_denovo</i>      | 11276474                       | (C/T)       |
| 19906       | CakSNP19906    | <i>Kabuli</i>    | <i>Ca_Kabuli_denovo</i>      | 11281562                       | (A/G)       |
| 19907       | CakSNP19907    | <i>Kabuli</i>    | <i>Ca_Kabuli_denovo</i>      | 11282591                       | (A/T)       |
| 19908       | CakSNP19908    | <i>Kabuli</i>    | <i>Ca_Kabuli_denovo</i>      | 11284197                       | (C/T)       |
| 19909       | CakSNP19909    | <i>Kabuli</i>    | <i>Ca_Kabuli_denovo</i>      | 11284218                       | (A/G)       |
| 19910       | CakSNP19910    | <i>Kabuli</i>    | <i>Ca_Kabuli_denovo</i>      | 11294318                       | (T/C)       |
| 19911       | CakSNP19911    | <i>Kabuli</i>    | <i>Ca_Kabuli_denovo</i>      | 11294360                       | (T/C)       |
| 19912       | CakSNP19912    | <i>Kabuli</i>    | <i>Ca_Kabuli_denovo</i>      | 11298034                       | (A/G)       |
| 19913       | CakSNP19913    | <i>Kabuli</i>    | <i>Ca_Kabuli_denovo</i>      | 11302009                       | (A/G)       |
| 19914       | CakSNP19914    | <i>Kabuli</i>    | <i>Ca_Kabuli_denovo</i>      | 11303066                       | (G/A)       |
| 19915       | CakSNP19915    | <i>Kabuli</i>    | <i>Ca_Kabuli_denovo</i>      | 11303067                       | (C/G)       |
| 19916       | CakSNP19916    | <i>Kabuli</i>    | <i>Ca_Kabuli_denovo</i>      | 11303075                       | (A/G)       |
| 19917       | CakSNP19917    | <i>Kabuli</i>    | <i>Ca_Kabuli_denovo</i>      | 11305242                       | (C/G)       |
| 19918       | CakSNP19918    | <i>Kabuli</i>    | <i>Ca_Kabuli_denovo</i>      | 11311346                       | (G/A)       |
| 19919       | CakSNP19919    | <i>Kabuli</i>    | <i>Ca_Kabuli_denovo</i>      | 11311355                       | (C/G)       |
| 19920       | CakSNP19920    | <i>Kabuli</i>    | <i>Ca_Kabuli_denovo</i>      | 11313010                       | (G/A)       |
| 19921       | CakSNP19921    | <i>Kabuli</i>    | <i>Ca_Kabuli_denovo</i>      | 11313019                       | (G/T)       |
| 19922       | CakSNP19922    | <i>Kabuli</i>    | <i>Ca_Kabuli_denovo</i>      | 11320821                       | (C/T)       |
| 19923       | CakSNP19923    | <i>Kabuli</i>    | <i>Ca_Kabuli_denovo</i>      | 11320852                       | (C/T)       |
| 19924       | CakSNP19924    | <i>Kabuli</i>    | <i>Ca_Kabuli_denovo</i>      | 11320859                       | (C/G)       |
| 19925       | CakSNP19925    | <i>Kabuli</i>    | <i>Ca_Kabuli_denovo</i>      | 11321893                       | (C/A)       |
| 19926       | CakSNP19926    | <i>Kabuli</i>    | <i>Ca_Kabuli_denovo</i>      | 11322134                       | (A/G)       |
| 19927       | CakSNP19927    | <i>Kabuli</i>    | <i>Ca_Kabuli_denovo</i>      | 11322171                       | (A/G)       |



| <b>S.N.</b> | <b>SNP IDs</b> | <b>Cultivars</b> | <b>Chromosomes/scaffolds</b> | <b>Physical positions (bp)</b> | <b>SNPs</b> |
|-------------|----------------|------------------|------------------------------|--------------------------------|-------------|
| 19928       | CakSNP19928    | <i>Kabuli</i>    | <i>Ca_Kabuli_denovo</i>      | 11322424                       | (G/A)       |
| 19929       | CakSNP19929    | <i>Kabuli</i>    | <i>Ca_Kabuli_denovo</i>      | 11328453                       | (T/C)       |
| 19930       | CakSNP19930    | <i>Kabuli</i>    | <i>Ca_Kabuli_denovo</i>      | 11328457                       | (A/G)       |
| 19931       | CakSNP19931    | <i>Kabuli</i>    | <i>Ca_Kabuli_denovo</i>      | 11330932                       | (A/C)       |
| 19932       | CakSNP19932    | <i>Kabuli</i>    | <i>Ca_Kabuli_denovo</i>      | 11335776                       | (T/C)       |
| 19933       | CakSNP19933    | <i>Kabuli</i>    | <i>Ca_Kabuli_denovo</i>      | 11335791                       | (T/C)       |
| 19934       | CakSNP19934    | <i>Kabuli</i>    | <i>Ca_Kabuli_denovo</i>      | 11336858                       | (T/C)       |
| 19935       | CakSNP19935    | <i>Kabuli</i>    | <i>Ca_Kabuli_denovo</i>      | 11337191                       | (G/A)       |
| 19936       | CakSNP19936    | <i>Kabuli</i>    | <i>Ca_Kabuli_denovo</i>      | 11338105                       | (G/C)       |
| 19937       | CakSNP19937    | <i>Kabuli</i>    | <i>Ca_Kabuli_denovo</i>      | 11338164                       | (A/T)       |
| 19938       | CakSNP19938    | <i>Kabuli</i>    | <i>Ca_Kabuli_denovo</i>      | 11338385                       | (G/A)       |
| 19939       | CakSNP19939    | <i>Kabuli</i>    | <i>Ca_Kabuli_denovo</i>      | 11338391                       | (C/G)       |
| 19940       | CakSNP19940    | <i>Kabuli</i>    | <i>Ca_Kabuli_denovo</i>      | 11346296                       | (G/T)       |
| 19941       | CakSNP19941    | <i>Kabuli</i>    | <i>Ca_Kabuli_denovo</i>      | 11353664                       | (T/C)       |
| 19942       | CakSNP19942    | <i>Kabuli</i>    | <i>Ca_Kabuli_denovo</i>      | 11361169                       | (G/C)       |
| 19943       | CakSNP19943    | <i>Kabuli</i>    | <i>Ca_Kabuli_denovo</i>      | 11361193                       | (C/A)       |
| 19944       | CakSNP19944    | <i>Kabuli</i>    | <i>Ca_Kabuli_denovo</i>      | 11361211                       | (A/G)       |
| 19945       | CakSNP19945    | <i>Kabuli</i>    | <i>Ca_Kabuli_denovo</i>      | 11361500                       | (G/C)       |
| 19946       | CakSNP19946    | <i>Kabuli</i>    | <i>Ca_Kabuli_denovo</i>      | 11361520                       | (C/T)       |
| 19947       | CakSNP19947    | <i>Kabuli</i>    | <i>Ca_Kabuli_denovo</i>      | 11375757                       | (C/T)       |
| 19948       | CakSNP19948    | <i>Kabuli</i>    | <i>Ca_Kabuli_denovo</i>      | 11378866                       | (C/T)       |
| 19949       | CakSNP19949    | <i>Kabuli</i>    | <i>Ca_Kabuli_denovo</i>      | 11378886                       | (G/C)       |
| 19950       | CakSNP19950    | <i>Kabuli</i>    | <i>Ca_Kabuli_denovo</i>      | 11386105                       | (C/T)       |
| 19951       | CakSNP19951    | <i>Kabuli</i>    | <i>Ca_Kabuli_denovo</i>      | 11386154                       | (C/G)       |
| 19952       | CakSNP19952    | <i>Kabuli</i>    | <i>Ca_Kabuli_denovo</i>      | 11389200                       | (G/C)       |
| 19953       | CakSNP19953    | <i>Kabuli</i>    | <i>Ca_Kabuli_denovo</i>      | 11393292                       | (C/T)       |
| 19954       | CakSNP19954    | <i>Kabuli</i>    | <i>Ca_Kabuli_denovo</i>      | 11400208                       | (C/G)       |
| 19955       | CakSNP19955    | <i>Kabuli</i>    | <i>Ca_Kabuli_denovo</i>      | 11400582                       | (C/A)       |
| 19956       | CakSNP19956    | <i>Kabuli</i>    | <i>Ca_Kabuli_denovo</i>      | 11402566                       | (C/T)       |
| 19957       | CakSNP19957    | <i>Kabuli</i>    | <i>Ca_Kabuli_denovo</i>      | 11403286                       | (A/G)       |
| 19958       | CakSNP19958    | <i>Kabuli</i>    | <i>Ca_Kabuli_denovo</i>      | 11407953                       | (A/G)       |
| 19959       | CakSNP19959    | <i>Kabuli</i>    | <i>Ca_Kabuli_denovo</i>      | 11416225                       | (A/G)       |
| 19960       | CakSNP19960    | <i>Kabuli</i>    | <i>Ca_Kabuli_denovo</i>      | 11430755                       | (A/G)       |
| 19961       | CakSNP19961    | <i>Kabuli</i>    | <i>Ca_Kabuli_denovo</i>      | 11434250                       | (T/G)       |
| 19962       | CakSNP19962    | <i>Kabuli</i>    | <i>Ca_Kabuli_denovo</i>      | 11441548                       | (G/C)       |
| 19963       | CakSNP19963    | <i>Kabuli</i>    | <i>Ca_Kabuli_denovo</i>      | 11441557                       | (T/C)       |
| 19964       | CakSNP19964    | <i>Kabuli</i>    | <i>Ca_Kabuli_denovo</i>      | 11452594                       | (T/C)       |
| 19965       | CakSNP19965    | <i>Kabuli</i>    | <i>Ca_Kabuli_denovo</i>      | 11452603                       | (A/G)       |
| 19966       | CakSNP19966    | <i>Kabuli</i>    | <i>Ca_Kabuli_denovo</i>      | 11455379                       | (G/T)       |

| <b>S.N.</b> | <b>SNP IDs</b> | <b>Cultivars</b> | <b>Chromosomes/scaffolds</b> | <b>Physical positions (bp)</b> | <b>SNPs</b> |
|-------------|----------------|------------------|------------------------------|--------------------------------|-------------|
| 19967       | CakSNP19967    | <i>Kabuli</i>    | <i>Ca_Kabuli_denovo</i>      | 11455475                       | (T/C)       |
| 19968       | CakSNP19968    | <i>Kabuli</i>    | <i>Ca_Kabuli_denovo</i>      | 11455484                       | (C/G)       |
| 19969       | CakSNP19969    | <i>Kabuli</i>    | <i>Ca_Kabuli_denovo</i>      | 11467373                       | (G/A)       |
| 19970       | CakSNP19970    | <i>Kabuli</i>    | <i>Ca_Kabuli_denovo</i>      | 11483928                       | (G/A)       |
| 19971       | CakSNP19971    | <i>Kabuli</i>    | <i>Ca_Kabuli_denovo</i>      | 11485151                       | (G/A)       |
| 19972       | CakSNP19972    | <i>Kabuli</i>    | <i>Ca_Kabuli_denovo</i>      | 11485417                       | (C/A)       |
| 19973       | CakSNP19973    | <i>Kabuli</i>    | <i>Ca_Kabuli_denovo</i>      | 11489691                       | (A/G)       |
| 19974       | CakSNP19974    | <i>Kabuli</i>    | <i>Ca_Kabuli_denovo</i>      | 11489727                       | (A/G)       |
| 19975       | CakSNP19975    | <i>Kabuli</i>    | <i>Ca_Kabuli_denovo</i>      | 11492137                       | (T/C)       |
| 19976       | CakSNP19976    | <i>Kabuli</i>    | <i>Ca_Kabuli_denovo</i>      | 11500226                       | (C/T)       |
| 19977       | CakSNP19977    | <i>Kabuli</i>    | <i>Ca_Kabuli_denovo</i>      | 11500286                       | (A/G)       |
| 19978       | CakSNP19978    | <i>Kabuli</i>    | <i>Ca_Kabuli_denovo</i>      | 11500518                       | (C/T)       |
| 19979       | CakSNP19979    | <i>Kabuli</i>    | <i>Ca_Kabuli_denovo</i>      | 11500549                       | (G/A)       |
| 19980       | CakSNP19980    | <i>Kabuli</i>    | <i>Ca_Kabuli_denovo</i>      | 11509689                       | (A/G)       |
| 19981       | CakSNP19981    | <i>Kabuli</i>    | <i>Ca_Kabuli_denovo</i>      | 11509710                       | (T/A)       |
| 19982       | CakSNP19982    | <i>Kabuli</i>    | <i>Ca_Kabuli_denovo</i>      | 11520113                       | (T/C)       |
| 19983       | CakSNP19983    | <i>Kabuli</i>    | <i>Ca_Kabuli_denovo</i>      | 11520121                       | (T/G)       |
| 19984       | CakSNP19984    | <i>Kabuli</i>    | <i>Ca_Kabuli_denovo</i>      | 11522244                       | (T/C)       |
| 19985       | CakSNP19985    | <i>Kabuli</i>    | <i>Ca_Kabuli_denovo</i>      | 11522247                       | (G/A)       |
| 19986       | CakSNP19986    | <i>Kabuli</i>    | <i>Ca_Kabuli_denovo</i>      | 11524862                       | (A/G)       |
| 19987       | CakSNP19987    | <i>Kabuli</i>    | <i>Ca_Kabuli_denovo</i>      | 11524904                       | (A/G)       |
| 19988       | CakSNP19988    | <i>Kabuli</i>    | <i>Ca_Kabuli_denovo</i>      | 11526181                       | (G/C)       |
| 19989       | CakSNP19989    | <i>Kabuli</i>    | <i>Ca_Kabuli_denovo</i>      | 11526429                       | (C/T)       |
| 19990       | CakSNP19990    | <i>Kabuli</i>    | <i>Ca_Kabuli_denovo</i>      | 11526440                       | (C/T)       |
| 19991       | CakSNP19991    | <i>Kabuli</i>    | <i>Ca_Kabuli_denovo</i>      | 11536624                       | (T/G)       |
| 19992       | CakSNP19992    | <i>Kabuli</i>    | <i>Ca_Kabuli_denovo</i>      | 11537381                       | (G/A)       |
| 19993       | CakSNP19993    | <i>Kabuli</i>    | <i>Ca_Kabuli_denovo</i>      | 11539912                       | (A/G)       |
| 19994       | CakSNP19994    | <i>Kabuli</i>    | <i>Ca_Kabuli_denovo</i>      | 11539928                       | (C/A)       |
| 19995       | CakSNP19995    | <i>Kabuli</i>    | <i>Ca_Kabuli_denovo</i>      | 11543736                       | (G/A)       |
| 19996       | CakSNP19996    | <i>Kabuli</i>    | <i>Ca_Kabuli_denovo</i>      | 11546270                       | (G/A)       |
| 19997       | CakSNP19997    | <i>Kabuli</i>    | <i>Ca_Kabuli_denovo</i>      | 11546282                       | (G/A)       |
| 19998       | CakSNP19998    | <i>Kabuli</i>    | <i>Ca_Kabuli_denovo</i>      | 11560747                       | (A/T)       |
| 19999       | CakSNP19999    | <i>Kabuli</i>    | <i>Ca_Kabuli_denovo</i>      | 11560777                       | (T/A)       |
| 20000       | CakSNP20000    | <i>Kabuli</i>    | <i>Ca_Kabuli_denovo</i>      | 11562092                       | (A/C)       |
| 20001       | CakSNP20001    | <i>Kabuli</i>    | <i>Ca_Kabuli_denovo</i>      | 11566483                       | (T/C)       |
| 20002       | CakSNP20002    | <i>Kabuli</i>    | <i>Ca_Kabuli_denovo</i>      | 11570439                       | (G/C)       |
| 20003       | CakSNP20003    | <i>Kabuli</i>    | <i>Ca_Kabuli_denovo</i>      | 11571669                       | (C/T)       |
| 20004       | CakSNP20004    | <i>Kabuli</i>    | <i>Ca_Kabuli_denovo</i>      | 11571683                       | (C/T)       |
| 20005       | CakSNP20005    | <i>Kabuli</i>    | <i>Ca_Kabuli_denovo</i>      | 11572107                       | (C/T)       |

| <b>S.N.</b> | <b>SNP IDs</b> | <b>Cultivars</b> | <b>Chromosomes/scaffolds</b> | <b>Physical positions (bp)</b> | <b>SNPs</b> |
|-------------|----------------|------------------|------------------------------|--------------------------------|-------------|
| 20006       | CakSNP20006    | <i>Kabuli</i>    | <i>Ca_Kabuli_denovo</i>      | 11576597                       | (G/A)       |
| 20007       | CakSNP20007    | <i>Kabuli</i>    | <i>Ca_Kabuli_denovo</i>      | 11582680                       | (A/G)       |
| 20008       | CakSNP20008    | <i>Kabuli</i>    | <i>Ca_Kabuli_denovo</i>      | 11584675                       | (A/G)       |
| 20009       | CakSNP20009    | <i>Kabuli</i>    | <i>Ca_Kabuli_denovo</i>      | 11594624                       | (T/C)       |
| 20010       | CakSNP20010    | <i>Kabuli</i>    | <i>Ca_Kabuli_denovo</i>      | 11596364                       | (G/A)       |
| 20011       | CakSNP20011    | <i>Kabuli</i>    | <i>Ca_Kabuli_denovo</i>      | 11596442                       | (A/G)       |
| 20012       | CakSNP20012    | <i>Kabuli</i>    | <i>Ca_Kabuli_denovo</i>      | 11597952                       | (C/T)       |
| 20013       | CakSNP20013    | <i>Kabuli</i>    | <i>Ca_Kabuli_denovo</i>      | 11597994                       | (A/G)       |
| 20014       | CakSNP20014    | <i>Kabuli</i>    | <i>Ca_Kabuli_denovo</i>      | 11601006                       | (G/T)       |
| 20015       | CakSNP20015    | <i>Kabuli</i>    | <i>Ca_Kabuli_denovo</i>      | 11602335                       | (G/C)       |
| 20016       | CakSNP20016    | <i>Kabuli</i>    | <i>Ca_Kabuli_denovo</i>      | 11602781                       | (C/G)       |
| 20017       | CakSNP20017    | <i>Kabuli</i>    | <i>Ca_Kabuli_denovo</i>      | 11603266                       | (T/A)       |
| 20018       | CakSNP20018    | <i>Kabuli</i>    | <i>Ca_Kabuli_denovo</i>      | 11621388                       | (A/G)       |
| 20019       | CakSNP20019    | <i>Kabuli</i>    | <i>Ca_Kabuli_denovo</i>      | 11622352                       | (G/C)       |
| 20020       | CakSNP20020    | <i>Kabuli</i>    | <i>Ca_Kabuli_denovo</i>      | 11622365                       | (A/T)       |
| 20021       | CakSNP20021    | <i>Kabuli</i>    | <i>Ca_Kabuli_denovo</i>      | 11628118                       | (T/C)       |
| 20022       | CakSNP20022    | <i>Kabuli</i>    | <i>Ca_Kabuli_denovo</i>      | 11628136                       | (A/C)       |
| 20023       | CakSNP20023    | <i>Kabuli</i>    | <i>Ca_Kabuli_denovo</i>      | 11629142                       | (G/C)       |
| 20024       | CakSNP20024    | <i>Kabuli</i>    | <i>Ca_Kabuli_denovo</i>      | 11629160                       | (T/G)       |
| 20025       | CakSNP20025    | <i>Kabuli</i>    | <i>Ca_Kabuli_denovo</i>      | 11632641                       | (T/G)       |
| 20026       | CakSNP20026    | <i>Kabuli</i>    | <i>Ca_Kabuli_denovo</i>      | 11632708                       | (T/C)       |
| 20027       | CakSNP20027    | <i>Kabuli</i>    | <i>Ca_Kabuli_denovo</i>      | 11633909                       | (A/G)       |
| 20028       | CakSNP20028    | <i>Kabuli</i>    | <i>Ca_Kabuli_denovo</i>      | 11635456                       | (T/C)       |
| 20029       | CakSNP20029    | <i>Kabuli</i>    | <i>Ca_Kabuli_denovo</i>      | 11635493                       | (G/C)       |
| 20030       | CakSNP20030    | <i>Kabuli</i>    | <i>Ca_Kabuli_denovo</i>      | 11637531                       | (C/T)       |
| 20031       | CakSNP20031    | <i>Kabuli</i>    | <i>Ca_Kabuli_denovo</i>      | 11647295                       | (G/A)       |
| 20032       | CakSNP20032    | <i>Kabuli</i>    | <i>Ca_Kabuli_denovo</i>      | 11647988                       | (A/G)       |
| 20033       | CakSNP20033    | <i>Kabuli</i>    | <i>Ca_Kabuli_denovo</i>      | 11653902                       | (C/A)       |
| 20034       | CakSNP20034    | <i>Kabuli</i>    | <i>Ca_Kabuli_denovo</i>      | 11654696                       | (G/T)       |
| 20035       | CakSNP20035    | <i>Kabuli</i>    | <i>Ca_Kabuli_denovo</i>      | 11654699                       | (G/A)       |
| 20036       | CakSNP20036    | <i>Kabuli</i>    | <i>Ca_Kabuli_denovo</i>      | 11657390                       | (G/A)       |
| 20037       | CakSNP20037    | <i>Kabuli</i>    | <i>Ca_Kabuli_denovo</i>      | 11657404                       | (G/A)       |
| 20038       | CakSNP20038    | <i>Kabuli</i>    | <i>Ca_Kabuli_denovo</i>      | 11657818                       | (C/T)       |
| 20039       | CakSNP20039    | <i>Kabuli</i>    | <i>Ca_Kabuli_denovo</i>      | 11657827                       | (C/G)       |
| 20040       | CakSNP20040    | <i>Kabuli</i>    | <i>Ca_Kabuli_denovo</i>      | 11658673                       | (G/C)       |
| 20041       | CakSNP20041    | <i>Kabuli</i>    | <i>Ca_Kabuli_denovo</i>      | 11658712                       | (G/T)       |
| 20042       | CakSNP20042    | <i>Kabuli</i>    | <i>Ca_Kabuli_denovo</i>      | 11658756                       | (C/G)       |
| 20043       | CakSNP20043    | <i>Kabuli</i>    | <i>Ca_Kabuli_denovo</i>      | 11659710                       | (C/G)       |
| 20044       | CakSNP20044    | <i>Kabuli</i>    | <i>Ca_Kabuli_denovo</i>      | 11663334                       | (T/C)       |

| <b>S.N.</b> | <b>SNP IDs</b> | <b>Cultivars</b> | <b>Chromosomes/scaffolds</b> | <b>Physical positions (bp)</b> | <b>SNPs</b> |
|-------------|----------------|------------------|------------------------------|--------------------------------|-------------|
| 20045       | CakSNP20045    | <i>Kabuli</i>    | <i>Ca_Kabuli_denovo</i>      | 11665747                       | (C/T)       |
| 20046       | CakSNP20046    | <i>Kabuli</i>    | <i>Ca_Kabuli_denovo</i>      | 11672834                       | (T/C)       |
| 20047       | CakSNP20047    | <i>Kabuli</i>    | <i>Ca_Kabuli_denovo</i>      | 11672842                       | (G/A)       |
| 20048       | CakSNP20048    | <i>Kabuli</i>    | <i>Ca_Kabuli_denovo</i>      | 11676813                       | (G/C)       |
| 20049       | CakSNP20049    | <i>Kabuli</i>    | <i>Ca_Kabuli_denovo</i>      | 11677203                       | (G/T)       |
| 20050       | CakSNP20050    | <i>Kabuli</i>    | <i>Ca_Kabuli_denovo</i>      | 11677211                       | (C/T)       |
| 20051       | CakSNP20051    | <i>Kabuli</i>    | <i>Ca_Kabuli_denovo</i>      | 11677396                       | (A/G)       |
| 20052       | CakSNP20052    | <i>Kabuli</i>    | <i>Ca_Kabuli_denovo</i>      | 11678405                       | (A/G)       |
| 20053       | CakSNP20053    | <i>Kabuli</i>    | <i>Ca_Kabuli_denovo</i>      | 11681261                       | (C/A)       |
| 20054       | CakSNP20054    | <i>Kabuli</i>    | <i>Ca_Kabuli_denovo</i>      | 11681262                       | (T/G)       |
| 20055       | CakSNP20055    | <i>Kabuli</i>    | <i>Ca_Kabuli_denovo</i>      | 11691933                       | (A/G)       |
| 20056       | CakSNP20056    | <i>Kabuli</i>    | <i>Ca_Kabuli_denovo</i>      | 11691993                       | (C/A)       |
| 20057       | CakSNP20057    | <i>Kabuli</i>    | <i>Ca_Kabuli_denovo</i>      | 11700734                       | (G/A)       |
| 20058       | CakSNP20058    | <i>Kabuli</i>    | <i>Ca_Kabuli_denovo</i>      | 11705216                       | (A/C)       |
| 20059       | CakSNP20059    | <i>Kabuli</i>    | <i>Ca_Kabuli_denovo</i>      | 11705234                       | (G/A)       |
| 20060       | CakSNP20060    | <i>Kabuli</i>    | <i>Ca_Kabuli_denovo</i>      | 11718358                       | (T/G)       |
| 20061       | CakSNP20061    | <i>Kabuli</i>    | <i>Ca_Kabuli_denovo</i>      | 11727596                       | (A/G)       |
| 20062       | CakSNP20062    | <i>Kabuli</i>    | <i>Ca_Kabuli_denovo</i>      | 11729357                       | (A/T)       |
| 20063       | CakSNP20063    | <i>Kabuli</i>    | <i>Ca_Kabuli_denovo</i>      | 11729711                       | (C/A)       |
| 20064       | CakSNP20064    | <i>Kabuli</i>    | <i>Ca_Kabuli_denovo</i>      | 11731601                       | (C/T)       |
| 20065       | CakSNP20065    | <i>Kabuli</i>    | <i>Ca_Kabuli_denovo</i>      | 11732939                       | (G/A)       |
| 20066       | CakSNP20066    | <i>Kabuli</i>    | <i>Ca_Kabuli_denovo</i>      | 11751802                       | (T/C)       |
| 20067       | CakSNP20067    | <i>Kabuli</i>    | <i>Ca_Kabuli_denovo</i>      | 11751841                       | (C/T)       |
| 20068       | CakSNP20068    | <i>Kabuli</i>    | <i>Ca_Kabuli_denovo</i>      | 11756035                       | (G/T)       |
| 20069       | CakSNP20069    | <i>Kabuli</i>    | <i>Ca_Kabuli_denovo</i>      | 11757946                       | (C/T)       |
| 20070       | CakSNP20070    | <i>Kabuli</i>    | <i>Ca_Kabuli_denovo</i>      | 11758845                       | (C/T)       |
| 20071       | CakSNP20071    | <i>Kabuli</i>    | <i>Ca_Kabuli_denovo</i>      | 11758846                       | (G/A)       |
| 20072       | CakSNP20072    | <i>Kabuli</i>    | <i>Ca_Kabuli_denovo</i>      | 11765477                       | (T/A)       |
| 20073       | CakSNP20073    | <i>Kabuli</i>    | <i>Ca_Kabuli_denovo</i>      | 11767720                       | (T/C)       |
| 20074       | CakSNP20074    | <i>Kabuli</i>    | <i>Ca_Kabuli_denovo</i>      | 11767747                       | (C/G)       |
| 20075       | CakSNP20075    | <i>Kabuli</i>    | <i>Ca_Kabuli_denovo</i>      | 11773745                       | (C/G)       |
| 20076       | CakSNP20076    | <i>Kabuli</i>    | <i>Ca_Kabuli_denovo</i>      | 11777816                       | (G/C)       |
| 20077       | CakSNP20077    | <i>Kabuli</i>    | <i>Ca_Kabuli_denovo</i>      | 11785619                       | (G/A)       |
| 20078       | CakSNP20078    | <i>Kabuli</i>    | <i>Ca_Kabuli_denovo</i>      | 11785637                       | (C/G)       |
| 20079       | CakSNP20079    | <i>Kabuli</i>    | <i>Ca_Kabuli_denovo</i>      | 11789993                       | (G/T)       |
| 20080       | CakSNP20080    | <i>Kabuli</i>    | <i>Ca_Kabuli_denovo</i>      | 11789999                       | (A/C)       |
| 20081       | CakSNP20081    | <i>Kabuli</i>    | <i>Ca_Kabuli_denovo</i>      | 11792609                       | (C/T)       |
| 20082       | CakSNP20082    | <i>Kabuli</i>    | <i>Ca_Kabuli_denovo</i>      | 11792678                       | (A/C)       |
| 20083       | CakSNP20083    | <i>Kabuli</i>    | <i>Ca_Kabuli_denovo</i>      | 11792680                       | (A/T)       |

| <b>S.N.</b> | <b>SNP IDs</b> | <b>Cultivars</b> | <b>Chromosomes/scaffolds</b> | <b>Physical positions (bp)</b> | <b>SNPs</b> |
|-------------|----------------|------------------|------------------------------|--------------------------------|-------------|
| 20084       | CakSNP20084    | <i>Kabuli</i>    | <i>Ca_Kabuli_denovo</i>      | 11797038                       | (T/C)       |
| 20085       | CakSNP20085    | <i>Kabuli</i>    | <i>Ca_Kabuli_denovo</i>      | 11797045                       | (C/A)       |
| 20086       | CakSNP20086    | <i>Kabuli</i>    | <i>Ca_Kabuli_denovo</i>      | 11797720                       | (C/T)       |
| 20087       | CakSNP20087    | <i>Kabuli</i>    | <i>Ca_Kabuli_denovo</i>      | 11798474                       | (A/G)       |
| 20088       | CakSNP20088    | <i>Kabuli</i>    | <i>Ca_Kabuli_denovo</i>      | 11800425                       | (C/T)       |
| 20089       | CakSNP20089    | <i>Kabuli</i>    | <i>Ca_Kabuli_denovo</i>      | 11800433                       | (C/A)       |
| 20090       | CakSNP20090    | <i>Kabuli</i>    | <i>Ca_Kabuli_denovo</i>      | 11801910                       | (G/C)       |
| 20091       | CakSNP20091    | <i>Kabuli</i>    | <i>Ca_Kabuli_denovo</i>      | 11801949                       | (A/G)       |
| 20092       | CakSNP20092    | <i>Kabuli</i>    | <i>Ca_Kabuli_denovo</i>      | 11801959                       | (C/G)       |
| 20093       | CakSNP20093    | <i>Kabuli</i>    | <i>Ca_Kabuli_denovo</i>      | 11813358                       | (T/C)       |
| 20094       | CakSNP20094    | <i>Kabuli</i>    | <i>Ca_Kabuli_denovo</i>      | 11813400                       | (T/A)       |
| 20095       | CakSNP20095    | <i>Kabuli</i>    | <i>Ca_Kabuli_denovo</i>      | 11818388                       | (C/G)       |
| 20096       | CakSNP20096    | <i>Kabuli</i>    | <i>Ca_Kabuli_denovo</i>      | 11818997                       | (A/C)       |
| 20097       | CakSNP20097    | <i>Kabuli</i>    | <i>Ca_Kabuli_denovo</i>      | 11818999                       | (A/C)       |
| 20098       | CakSNP20098    | <i>Kabuli</i>    | <i>Ca_Kabuli_denovo</i>      | 11821809                       | (C/T)       |
| 20099       | CakSNP20099    | <i>Kabuli</i>    | <i>Ca_Kabuli_denovo</i>      | 11826617                       | (G/T)       |
| 20100       | CakSNP20100    | <i>Kabuli</i>    | <i>Ca_Kabuli_denovo</i>      | 11826835                       | (C/T)       |
| 20101       | CakSNP20101    | <i>Kabuli</i>    | <i>Ca_Kabuli_denovo</i>      | 11826865                       | (T/C)       |
| 20102       | CakSNP20102    | <i>Kabuli</i>    | <i>Ca_Kabuli_denovo</i>      | 11828227                       | (C/A)       |
| 20103       | CakSNP20103    | <i>Kabuli</i>    | <i>Ca_Kabuli_denovo</i>      | 11832922                       | (A/G)       |
| 20104       | CakSNP20104    | <i>Kabuli</i>    | <i>Ca_Kabuli_denovo</i>      | 11836267                       | (T/C)       |
| 20105       | CakSNP20105    | <i>Kabuli</i>    | <i>Ca_Kabuli_denovo</i>      | 11836286                       | (C/T)       |
| 20106       | CakSNP20106    | <i>Kabuli</i>    | <i>Ca_Kabuli_denovo</i>      | 11839483                       | (T/C)       |
| 20107       | CakSNP20107    | <i>Kabuli</i>    | <i>Ca_Kabuli_denovo</i>      | 11841284                       | (A/G)       |
| 20108       | CakSNP20108    | <i>Kabuli</i>    | <i>Ca_Kabuli_denovo</i>      | 11842163                       | (T/C)       |
| 20109       | CakSNP20109    | <i>Kabuli</i>    | <i>Ca_Kabuli_denovo</i>      | 11842187                       | (T/C)       |
| 20110       | CakSNP20110    | <i>Kabuli</i>    | <i>Ca_Kabuli_denovo</i>      | 11844115                       | (G/C)       |
| 20111       | CakSNP20111    | <i>Kabuli</i>    | <i>Ca_Kabuli_denovo</i>      | 11848053                       | (T/C)       |
| 20112       | CakSNP20112    | <i>Kabuli</i>    | <i>Ca_Kabuli_denovo</i>      | 11850589                       | (C/G)       |
| 20113       | CakSNP20113    | <i>Kabuli</i>    | <i>Ca_Kabuli_denovo</i>      | 11851324                       | (T/C)       |
| 20114       | CakSNP20114    | <i>Kabuli</i>    | <i>Ca_Kabuli_denovo</i>      | 11851331                       | (G/A)       |
| 20115       | CakSNP20115    | <i>Kabuli</i>    | <i>Ca_Kabuli_denovo</i>      | 11853095                       | (T/A)       |
| 20116       | CakSNP20116    | <i>Kabuli</i>    | <i>Ca_Kabuli_denovo</i>      | 11855554                       | (A/G)       |
| 20117       | CakSNP20117    | <i>Kabuli</i>    | <i>Ca_Kabuli_denovo</i>      | 11855592                       | (A/T)       |
| 20118       | CakSNP20118    | <i>Kabuli</i>    | <i>Ca_Kabuli_denovo</i>      | 11857112                       | (A/G)       |
| 20119       | CakSNP20119    | <i>Kabuli</i>    | <i>Ca_Kabuli_denovo</i>      | 11858823                       | (C/G)       |
| 20120       | CakSNP20120    | <i>Kabuli</i>    | <i>Ca_Kabuli_denovo</i>      | 11858841                       | (C/T)       |
| 20121       | CakSNP20121    | <i>Kabuli</i>    | <i>Ca_Kabuli_denovo</i>      | 11867607                       | (G/A)       |
| 20122       | CakSNP20122    | <i>Kabuli</i>    | <i>Ca_Kabuli_denovo</i>      | 11868238                       | (A/G)       |

| <b>S.N.</b> | <b>SNP IDs</b> | <b>Cultivars</b> | <b>Chromosomes/scaffolds</b> | <b>Physical positions (bp)</b> | <b>SNPs</b> |
|-------------|----------------|------------------|------------------------------|--------------------------------|-------------|
| 20123       | CakSNP20123    | <i>Kabuli</i>    | <i>Ca_Kabuli_denovo</i>      | 11868277                       | (C/T)       |
| 20124       | CakSNP20124    | <i>Kabuli</i>    | <i>Ca_Kabuli_denovo</i>      | 11870258                       | (T/C)       |
| 20125       | CakSNP20125    | <i>Kabuli</i>    | <i>Ca_Kabuli_denovo</i>      | 11879386                       | (A/C)       |
| 20126       | CakSNP20126    | <i>Kabuli</i>    | <i>Ca_Kabuli_denovo</i>      | 11879392                       | (T/C)       |
| 20127       | CakSNP20127    | <i>Kabuli</i>    | <i>Ca_Kabuli_denovo</i>      | 11887761                       | (T/C)       |
| 20128       | CakSNP20128    | <i>Kabuli</i>    | <i>Ca_Kabuli_denovo</i>      | 11887771                       | (T/C)       |
| 20129       | CakSNP20129    | <i>Kabuli</i>    | <i>Ca_Kabuli_denovo</i>      | 11888785                       | (T/C)       |
| 20130       | CakSNP20130    | <i>Kabuli</i>    | <i>Ca_Kabuli_denovo</i>      | 11888809                       | (T/C)       |
| 20131       | CakSNP20131    | <i>Kabuli</i>    | <i>Ca_Kabuli_denovo</i>      | 11901103                       | (A/T)       |
| 20132       | CakSNP20132    | <i>Kabuli</i>    | <i>Ca_Kabuli_denovo</i>      | 11904032                       | (G/T)       |
| 20133       | CakSNP20133    | <i>Kabuli</i>    | <i>Ca_Kabuli_denovo</i>      | 11905598                       | (T/A)       |
| 20134       | CakSNP20134    | <i>Kabuli</i>    | <i>Ca_Kabuli_denovo</i>      | 11905613                       | (C/G)       |
| 20135       | CakSNP20135    | <i>Kabuli</i>    | <i>Ca_Kabuli_denovo</i>      | 11909810                       | (G/C)       |
| 20136       | CakSNP20136    | <i>Kabuli</i>    | <i>Ca_Kabuli_denovo</i>      | 11913469                       | (A/G)       |
| 20137       | CakSNP20137    | <i>Kabuli</i>    | <i>Ca_Kabuli_denovo</i>      | 11917788                       | (G/C)       |
| 20138       | CakSNP20138    | <i>Kabuli</i>    | <i>Ca_Kabuli_denovo</i>      | 11918472                       | (T/C)       |
| 20139       | CakSNP20139    | <i>Kabuli</i>    | <i>Ca_Kabuli_denovo</i>      | 11921650                       | (T/C)       |
| 20140       | CakSNP20140    | <i>Kabuli</i>    | <i>Ca_Kabuli_denovo</i>      | 11921653                       | (C/T)       |
| 20141       | CakSNP20141    | <i>Kabuli</i>    | <i>Ca_Kabuli_denovo</i>      | 11926343                       | (G/A)       |
| 20142       | CakSNP20142    | <i>Kabuli</i>    | <i>Ca_Kabuli_denovo</i>      | 11926414                       | (C/G)       |
| 20143       | CakSNP20143    | <i>Kabuli</i>    | <i>Ca_Kabuli_denovo</i>      | 11928286                       | (C/G)       |
| 20144       | CakSNP20144    | <i>Kabuli</i>    | <i>Ca_Kabuli_denovo</i>      | 11928288                       | (A/G)       |
| 20145       | CakSNP20145    | <i>Kabuli</i>    | <i>Ca_Kabuli_denovo</i>      | 11932767                       | (C/T)       |
| 20146       | CakSNP20146    | <i>Kabuli</i>    | <i>Ca_Kabuli_denovo</i>      | 11933776                       | (T/C)       |
| 20147       | CakSNP20147    | <i>Kabuli</i>    | <i>Ca_Kabuli_denovo</i>      | 11933779                       | (T/C)       |
| 20148       | CakSNP20148    | <i>Kabuli</i>    | <i>Ca_Kabuli_denovo</i>      | 11934806                       | (A/G)       |
| 20149       | CakSNP20149    | <i>Kabuli</i>    | <i>Ca_Kabuli_denovo</i>      | 11934835                       | (C/T)       |
| 20150       | CakSNP20150    | <i>Kabuli</i>    | <i>Ca_Kabuli_denovo</i>      | 11935833                       | (C/T)       |
| 20151       | CakSNP20151    | <i>Kabuli</i>    | <i>Ca_Kabuli_denovo</i>      | 11936229                       | (A/T)       |
| 20152       | CakSNP20152    | <i>Kabuli</i>    | <i>Ca_Kabuli_denovo</i>      | 11937312                       | (A/G)       |
| 20153       | CakSNP20153    | <i>Kabuli</i>    | <i>Ca_Kabuli_denovo</i>      | 11937322                       | (A/C)       |
| 20154       | CakSNP20154    | <i>Kabuli</i>    | <i>Ca_Kabuli_denovo</i>      | 11937520                       | (G/T)       |
| 20155       | CakSNP20155    | <i>Kabuli</i>    | <i>Ca_Kabuli_denovo</i>      | 11941139                       | (A/G)       |
| 20156       | CakSNP20156    | <i>Kabuli</i>    | <i>Ca_Kabuli_denovo</i>      | 11942242                       | (T/A)       |
| 20157       | CakSNP20157    | <i>Kabuli</i>    | <i>Ca_Kabuli_denovo</i>      | 11942299                       | (C/T)       |
| 20158       | CakSNP20158    | <i>Kabuli</i>    | <i>Ca_Kabuli_denovo</i>      | 11947730                       | (T/A)       |
| 20159       | CakSNP20159    | <i>Kabuli</i>    | <i>Ca_Kabuli_denovo</i>      | 11953049                       | (C/G)       |
| 20160       | CakSNP20160    | <i>Kabuli</i>    | <i>Ca_Kabuli_denovo</i>      | 11962838                       | (A/G)       |
| 20161       | CakSNP20161    | <i>Kabuli</i>    | <i>Ca_Kabuli_denovo</i>      | 11962840                       | (G/A)       |

| <b>S.N.</b> | <b>SNP IDs</b> | <b>Cultivars</b> | <b>Chromosomes/scaffolds</b> | <b>Physical positions (bp)</b> | <b>SNPs</b> |
|-------------|----------------|------------------|------------------------------|--------------------------------|-------------|
| 20162       | CakSNP20162    | <i>Kabuli</i>    | <i>Ca_Kabuli_denovo</i>      | 11965507                       | (A/G)       |
| 20163       | CakSNP20163    | <i>Kabuli</i>    | <i>Ca_Kabuli_denovo</i>      | 11965510                       | (G/A)       |
| 20164       | CakSNP20164    | <i>Kabuli</i>    | <i>Ca_Kabuli_denovo</i>      | 11970885                       | (C/G)       |
| 20165       | CakSNP20165    | <i>Kabuli</i>    | <i>Ca_Kabuli_denovo</i>      | 11976757                       | (C/G)       |
| 20166       | CakSNP20166    | <i>Kabuli</i>    | <i>Ca_Kabuli_denovo</i>      | 11983367                       | (T/C)       |
| 20167       | CakSNP20167    | <i>Kabuli</i>    | <i>Ca_Kabuli_denovo</i>      | 11983391                       | (C/A)       |
| 20168       | CakSNP20168    | <i>Kabuli</i>    | <i>Ca_Kabuli_denovo</i>      | 11986506                       | (G/A)       |
| 20169       | CakSNP20169    | <i>Kabuli</i>    | <i>Ca_Kabuli_denovo</i>      | 11986536                       | (A/G)       |
| 20170       | CakSNP20170    | <i>Kabuli</i>    | <i>Ca_Kabuli_denovo</i>      | 11986557                       | (A/G)       |
| 20171       | CakSNP20171    | <i>Kabuli</i>    | <i>Ca_Kabuli_denovo</i>      | 11987561                       | (G/C)       |
| 20172       | CakSNP20172    | <i>Kabuli</i>    | <i>Ca_Kabuli_denovo</i>      | 11993728                       | (G/A)       |
| 20173       | CakSNP20173    | <i>Kabuli</i>    | <i>Ca_Kabuli_denovo</i>      | 12005056                       | (T/C)       |
| 20174       | CakSNP20174    | <i>Kabuli</i>    | <i>Ca_Kabuli_denovo</i>      | 12008099                       | (T/C)       |
| 20175       | CakSNP20175    | <i>Kabuli</i>    | <i>Ca_Kabuli_denovo</i>      | 12008111                       | (T/C)       |
| 20176       | CakSNP20176    | <i>Kabuli</i>    | <i>Ca_Kabuli_denovo</i>      | 12010534                       | (A/T)       |
| 20177       | CakSNP20177    | <i>Kabuli</i>    | <i>Ca_Kabuli_denovo</i>      | 12018239                       | (A/G)       |
| 20178       | CakSNP20178    | <i>Kabuli</i>    | <i>Ca_Kabuli_denovo</i>      | 12019804                       | (C/T)       |
| 20179       | CakSNP20179    | <i>Kabuli</i>    | <i>Ca_Kabuli_denovo</i>      | 12024854                       | (T/G)       |
| 20180       | CakSNP20180    | <i>Kabuli</i>    | <i>Ca_Kabuli_denovo</i>      | 12027996                       | (C/G)       |
| 20181       | CakSNP20181    | <i>Kabuli</i>    | <i>Ca_Kabuli_denovo</i>      | 12028061                       | (A/G)       |
| 20182       | CakSNP20182    | <i>Kabuli</i>    | <i>Ca_Kabuli_denovo</i>      | 12033965                       | (G/A)       |
| 20183       | CakSNP20183    | <i>Kabuli</i>    | <i>Ca_Kabuli_denovo</i>      | 12033971                       | (C/T)       |
| 20184       | CakSNP20184    | <i>Kabuli</i>    | <i>Ca_Kabuli_denovo</i>      | 12036188                       | (A/G)       |
| 20185       | CakSNP20185    | <i>Kabuli</i>    | <i>Ca_Kabuli_denovo</i>      | 12036224                       | (T/A)       |
| 20186       | CakSNP20186    | <i>Kabuli</i>    | <i>Ca_Kabuli_denovo</i>      | 12037582                       | (A/G)       |
| 20187       | CakSNP20187    | <i>Kabuli</i>    | <i>Ca_Kabuli_denovo</i>      | 12037583                       | (T/C)       |
| 20188       | CakSNP20188    | <i>Kabuli</i>    | <i>Ca_Kabuli_denovo</i>      | 12041729                       | (T/G)       |
| 20189       | CakSNP20189    | <i>Kabuli</i>    | <i>Ca_Kabuli_denovo</i>      | 12049740                       | (G/A)       |
| 20190       | CakSNP20190    | <i>Kabuli</i>    | <i>Ca_Kabuli_denovo</i>      | 12054052                       | (T/G)       |
| 20191       | CakSNP20191    | <i>Kabuli</i>    | <i>Ca_Kabuli_denovo</i>      | 12063452                       | (G/A)       |
| 20192       | CakSNP20192    | <i>Kabuli</i>    | <i>Ca_Kabuli_denovo</i>      | 12063460                       | (C/T)       |
| 20193       | CakSNP20193    | <i>Kabuli</i>    | <i>Ca_Kabuli_denovo</i>      | 12065643                       | (T/G)       |
| 20194       | CakSNP20194    | <i>Kabuli</i>    | <i>Ca_Kabuli_denovo</i>      | 12066145                       | (T/C)       |
| 20195       | CakSNP20195    | <i>Kabuli</i>    | <i>Ca_Kabuli_denovo</i>      | 12075499                       | (A/T)       |
| 20196       | CakSNP20196    | <i>Kabuli</i>    | <i>Ca_Kabuli_denovo</i>      | 12075514                       | (A/T)       |
| 20197       | CakSNP20197    | <i>Kabuli</i>    | <i>Ca_Kabuli_denovo</i>      | 12075516                       | (C/G)       |
| 20198       | CakSNP20198    | <i>Kabuli</i>    | <i>Ca_Kabuli_denovo</i>      | 12075524                       | (C/G)       |
| 20199       | CakSNP20199    | <i>Kabuli</i>    | <i>Ca_Kabuli_denovo</i>      | 12076633                       | (T/C)       |
| 20200       | CakSNP20200    | <i>Kabuli</i>    | <i>Ca_Kabuli_denovo</i>      | 12076636                       | (A/G)       |

| <b>S.N.</b> | <b>SNP IDs</b> | <b>Cultivars</b> | <b>Chromosomes/scaffolds</b> | <b>Physical positions (bp)</b> | <b>SNPs</b> |
|-------------|----------------|------------------|------------------------------|--------------------------------|-------------|
| 20201       | CakSNP20201    | <i>Kabuli</i>    | <i>Ca_Kabuli_denovo</i>      | 12077380                       | (C/T)       |
| 20202       | CakSNP20202    | <i>Kabuli</i>    | <i>Ca_Kabuli_denovo</i>      | 12079082                       | (G/A)       |
| 20203       | CakSNP20203    | <i>Kabuli</i>    | <i>Ca_Kabuli_denovo</i>      | 12079352                       | (G/A)       |
| 20204       | CakSNP20204    | <i>Kabuli</i>    | <i>Ca_Kabuli_denovo</i>      | 12079358                       | (G/C)       |
| 20205       | CakSNP20205    | <i>Kabuli</i>    | <i>Ca_Kabuli_denovo</i>      | 12083899                       | (T/C)       |
| 20206       | CakSNP20206    | <i>Kabuli</i>    | <i>Ca_Kabuli_denovo</i>      | 12083908                       | (G/T)       |
| 20207       | CakSNP20207    | <i>Kabuli</i>    | <i>Ca_Kabuli_denovo</i>      | 12090488                       | (C/G)       |
| 20208       | CakSNP20208    | <i>Kabuli</i>    | <i>Ca_Kabuli_denovo</i>      | 12100423                       | (C/T)       |
| 20209       | CakSNP20209    | <i>Kabuli</i>    | <i>Ca_Kabuli_denovo</i>      | 12100504                       | (C/A)       |
| 20210       | CakSNP20210    | <i>Kabuli</i>    | <i>Ca_Kabuli_denovo</i>      | 12105637                       | (T/C)       |
| 20211       | CakSNP20211    | <i>Kabuli</i>    | <i>Ca_Kabuli_denovo</i>      | 12105669                       | (G/A)       |
| 20212       | CakSNP20212    | <i>Kabuli</i>    | <i>Ca_Kabuli_denovo</i>      | 12108912                       | (G/A)       |
| 20213       | CakSNP20213    | <i>Kabuli</i>    | <i>Ca_Kabuli_denovo</i>      | 12118782                       | (G/T)       |
| 20214       | CakSNP20214    | <i>Kabuli</i>    | <i>Ca_Kabuli_denovo</i>      | 12118820                       | (T/A)       |
| 20215       | CakSNP20215    | <i>Kabuli</i>    | <i>Ca_Kabuli_denovo</i>      | 12123015                       | (A/C)       |
| 20216       | CakSNP20216    | <i>Kabuli</i>    | <i>Ca_Kabuli_denovo</i>      | 12123016                       | (G/C)       |
| 20217       | CakSNP20217    | <i>Kabuli</i>    | <i>Ca_Kabuli_denovo</i>      | 12128221                       | (A/C)       |
| 20218       | CakSNP20218    | <i>Kabuli</i>    | <i>Ca_Kabuli_denovo</i>      | 12129661                       | (T/C)       |
| 20219       | CakSNP20219    | <i>Kabuli</i>    | <i>Ca_Kabuli_denovo</i>      | 12132152                       | (C/T)       |
| 20220       | CakSNP20220    | <i>Kabuli</i>    | <i>Ca_Kabuli_denovo</i>      | 12140555                       | (C/T)       |
| 20221       | CakSNP20221    | <i>Kabuli</i>    | <i>Ca_Kabuli_denovo</i>      | 12140573                       | (C/A)       |
| 20222       | CakSNP20222    | <i>Kabuli</i>    | <i>Ca_Kabuli_denovo</i>      | 12141836                       | (G/A)       |
| 20223       | CakSNP20223    | <i>Kabuli</i>    | <i>Ca_Kabuli_denovo</i>      | 12142574                       | (A/G)       |
| 20224       | CakSNP20224    | <i>Kabuli</i>    | <i>Ca_Kabuli_denovo</i>      | 12151348                       | (A/G)       |
| 20225       | CakSNP20225    | <i>Kabuli</i>    | <i>Ca_Kabuli_denovo</i>      | 12151375                       | (A/G)       |
| 20226       | CakSNP20226    | <i>Kabuli</i>    | <i>Ca_Kabuli_denovo</i>      | 12157446                       | (T/G)       |
| 20227       | CakSNP20227    | <i>Kabuli</i>    | <i>Ca_Kabuli_denovo</i>      | 12157447                       | (T/A)       |
| 20228       | CakSNP20228    | <i>Kabuli</i>    | <i>Ca_Kabuli_denovo</i>      | 12157570                       | (G/A)       |
| 20229       | CakSNP20229    | <i>Kabuli</i>    | <i>Ca_Kabuli_denovo</i>      | 12160442                       | (T/G)       |
| 20230       | CakSNP20230    | <i>Kabuli</i>    | <i>Ca_Kabuli_denovo</i>      | 12160463                       | (C/T)       |
| 20231       | CakSNP20231    | <i>Kabuli</i>    | <i>Ca_Kabuli_denovo</i>      | 12160547                       | (T/C)       |
| 20232       | CakSNP20232    | <i>Kabuli</i>    | <i>Ca_Kabuli_denovo</i>      | 12160588                       | (A/G)       |
| 20233       | CakSNP20233    | <i>Kabuli</i>    | <i>Ca_Kabuli_denovo</i>      | 12161049                       | (A/C)       |
| 20234       | CakSNP20234    | <i>Kabuli</i>    | <i>Ca_Kabuli_denovo</i>      | 12163984                       | (G/C)       |
| 20235       | CakSNP20235    | <i>Kabuli</i>    | <i>Ca_Kabuli_denovo</i>      | 12170666                       | (T/C)       |
| 20236       | CakSNP20236    | <i>Kabuli</i>    | <i>Ca_Kabuli_denovo</i>      | 12174208                       | (C/G)       |
| 20237       | CakSNP20237    | <i>Kabuli</i>    | <i>Ca_Kabuli_denovo</i>      | 12178363                       | (A/G)       |
| 20238       | CakSNP20238    | <i>Kabuli</i>    | <i>Ca_Kabuli_denovo</i>      | 12181987                       | (G/A)       |
| 20239       | CakSNP20239    | <i>Kabuli</i>    | <i>Ca_Kabuli_denovo</i>      | 12182026                       | (C/G)       |



| <b>S.N.</b> | <b>SNP IDs</b> | <b>Cultivars</b> | <b>Chromosomes/scaffolds</b> | <b>Physical positions (bp)</b> | <b>SNPs</b> |
|-------------|----------------|------------------|------------------------------|--------------------------------|-------------|
| 20240       | CakSNP20240    | <i>Kabuli</i>    | <i>Ca_Kabuli_denovo</i>      | 12186730                       | (T/C)       |
| 20241       | CakSNP20241    | <i>Kabuli</i>    | <i>Ca_Kabuli_denovo</i>      | 12186760                       | (C/G)       |
| 20242       | CakSNP20242    | <i>Kabuli</i>    | <i>Ca_Kabuli_denovo</i>      | 12187344                       | (A/G)       |
| 20243       | CakSNP20243    | <i>Kabuli</i>    | <i>Ca_Kabuli_denovo</i>      | 12192872                       | (C/T)       |
| 20244       | CakSNP20244    | <i>Kabuli</i>    | <i>Ca_Kabuli_denovo</i>      | 12201334                       | (A/G)       |
| 20245       | CakSNP20245    | <i>Kabuli</i>    | <i>Ca_Kabuli_denovo</i>      | 12202915                       | (A/G)       |
| 20246       | CakSNP20246    | <i>Kabuli</i>    | <i>Ca_Kabuli_denovo</i>      | 12209776                       | (T/C)       |
| 20247       | CakSNP20247    | <i>Kabuli</i>    | <i>Ca_Kabuli_denovo</i>      | 12215372                       | (G/T)       |
| 20248       | CakSNP20248    | <i>Kabuli</i>    | <i>Ca_Kabuli_denovo</i>      | 12216070                       | (C/T)       |
| 20249       | CakSNP20249    | <i>Kabuli</i>    | <i>Ca_Kabuli_denovo</i>      | 12217982                       | (G/A)       |
| 20250       | CakSNP20250    | <i>Kabuli</i>    | <i>Ca_Kabuli_denovo</i>      | 12234821                       | (C/T)       |
| 20251       | CakSNP20251    | <i>Kabuli</i>    | <i>Ca_Kabuli_denovo</i>      | 12236422                       | (T/C)       |
| 20252       | CakSNP20252    | <i>Kabuli</i>    | <i>Ca_Kabuli_denovo</i>      | 12239018                       | (C/G)       |
| 20253       | CakSNP20253    | <i>Kabuli</i>    | <i>Ca_Kabuli_denovo</i>      | 12240512                       | (A/G)       |
| 20254       | CakSNP20254    | <i>Kabuli</i>    | <i>Ca_Kabuli_denovo</i>      | 12240549                       | (A/G)       |
| 20255       | CakSNP20255    | <i>Kabuli</i>    | <i>Ca_Kabuli_denovo</i>      | 12243380                       | (A/G)       |
| 20256       | CakSNP20256    | <i>Kabuli</i>    | <i>Ca_Kabuli_denovo</i>      | 12248626                       | (A/G)       |
| 20257       | CakSNP20257    | <i>Kabuli</i>    | <i>Ca_Kabuli_denovo</i>      | 12251127                       | (C/A)       |
| 20258       | CakSNP20258    | <i>Kabuli</i>    | <i>Ca_Kabuli_denovo</i>      | 12252623                       | (A/G)       |
| 20259       | CakSNP20259    | <i>Kabuli</i>    | <i>Ca_Kabuli_denovo</i>      | 12257991                       | (T/C)       |
| 20260       | CakSNP20260    | <i>Kabuli</i>    | <i>Ca_Kabuli_denovo</i>      | 12257993                       | (T/G)       |
| 20261       | CakSNP20261    | <i>Kabuli</i>    | <i>Ca_Kabuli_denovo</i>      | 12264308                       | (G/T)       |
| 20262       | CakSNP20262    | <i>Kabuli</i>    | <i>Ca_Kabuli_denovo</i>      | 12266786                       | (A/G)       |
| 20263       | CakSNP20263    | <i>Kabuli</i>    | <i>Ca_Kabuli_denovo</i>      | 12269505                       | (G/C)       |
| 20264       | CakSNP20264    | <i>Kabuli</i>    | <i>Ca_Kabuli_denovo</i>      | 12292363                       | (G/C)       |
| 20265       | CakSNP20265    | <i>Kabuli</i>    | <i>Ca_Kabuli_denovo</i>      | 12298060                       | (C/G)       |
| 20266       | CakSNP20266    | <i>Kabuli</i>    | <i>Ca_Kabuli_denovo</i>      | 12298745                       | (C/T)       |
| 20267       | CakSNP20267    | <i>Kabuli</i>    | <i>Ca_Kabuli_denovo</i>      | 12301582                       | (A/C)       |
| 20268       | CakSNP20268    | <i>Kabuli</i>    | <i>Ca_Kabuli_denovo</i>      | 12309140                       | (G/A)       |
| 20269       | CakSNP20269    | <i>Kabuli</i>    | <i>Ca_Kabuli_denovo</i>      | 12309148                       | (A/G)       |
| 20270       | CakSNP20270    | <i>Kabuli</i>    | <i>Ca_Kabuli_denovo</i>      | 12318085                       | (T/C)       |
| 20271       | CakSNP20271    | <i>Kabuli</i>    | <i>Ca_Kabuli_denovo</i>      | 12318112                       | (T/C)       |
| 20272       | CakSNP20272    | <i>Kabuli</i>    | <i>Ca_Kabuli_denovo</i>      | 12319732                       | (G/C)       |
| 20273       | CakSNP20273    | <i>Kabuli</i>    | <i>Ca_Kabuli_denovo</i>      | 12323652                       | (G/C)       |
| 20274       | CakSNP20274    | <i>Kabuli</i>    | <i>Ca_Kabuli_denovo</i>      | 12329986                       | (G/A)       |
| 20275       | CakSNP20275    | <i>Kabuli</i>    | <i>Ca_Kabuli_denovo</i>      | 12329992                       | (C/T)       |
| 20276       | CakSNP20276    | <i>Kabuli</i>    | <i>Ca_Kabuli_denovo</i>      | 12331347                       | (C/G)       |
| 20277       | CakSNP20277    | <i>Kabuli</i>    | <i>Ca_Kabuli_denovo</i>      | 12331761                       | (G/C)       |
| 20278       | CakSNP20278    | <i>Kabuli</i>    | <i>Ca_Kabuli_denovo</i>      | 12331775                       | (C/G)       |

| <b>S.N.</b> | <b>SNP IDs</b> | <b>Cultivars</b> | <b>Chromosomes/scaffolds</b> | <b>Physical positions (bp)</b> | <b>SNPs</b> |
|-------------|----------------|------------------|------------------------------|--------------------------------|-------------|
| 20279       | CakSNP20279    | <i>Kabuli</i>    | <i>Ca_Kabuli_denovo</i>      | 12343528                       | (T/C)       |
| 20280       | CakSNP20280    | <i>Kabuli</i>    | <i>Ca_Kabuli_denovo</i>      | 12343563                       | (T/C)       |
| 20281       | CakSNP20281    | <i>Kabuli</i>    | <i>Ca_Kabuli_denovo</i>      | 12348038                       | (C/G)       |
| 20282       | CakSNP20282    | <i>Kabuli</i>    | <i>Ca_Kabuli_denovo</i>      | 12348044                       | (C/G)       |
| 20283       | CakSNP20283    | <i>Kabuli</i>    | <i>Ca_Kabuli_denovo</i>      | 12356015                       | (T/C)       |
| 20284       | CakSNP20284    | <i>Kabuli</i>    | <i>Ca_Kabuli_denovo</i>      | 12360701                       | (T/G)       |
| 20285       | CakSNP20285    | <i>Kabuli</i>    | <i>Ca_Kabuli_denovo</i>      | 12360722                       | (C/T)       |
| 20286       | CakSNP20286    | <i>Kabuli</i>    | <i>Ca_Kabuli_denovo</i>      | 12364826                       | (G/T)       |
| 20287       | CakSNP20287    | <i>Kabuli</i>    | <i>Ca_Kabuli_denovo</i>      | 12365459                       | (A/C)       |
| 20288       | CakSNP20288    | <i>Kabuli</i>    | <i>Ca_Kabuli_denovo</i>      | 12368369                       | (C/T)       |
| 20289       | CakSNP20289    | <i>Kabuli</i>    | <i>Ca_Kabuli_denovo</i>      | 12380551                       | (A/T)       |
| 20290       | CakSNP20290    | <i>Kabuli</i>    | <i>Ca_Kabuli_denovo</i>      | 12380579                       | (G/C)       |
| 20291       | CakSNP20291    | <i>Kabuli</i>    | <i>Ca_Kabuli_denovo</i>      | 12381201                       | (C/T)       |
| 20292       | CakSNP20292    | <i>Kabuli</i>    | <i>Ca_Kabuli_denovo</i>      | 12381391                       | (C/T)       |
| 20293       | CakSNP20293    | <i>Kabuli</i>    | <i>Ca_Kabuli_denovo</i>      | 12385312                       | (G/C)       |
| 20294       | CakSNP20294    | <i>Kabuli</i>    | <i>Ca_Kabuli_denovo</i>      | 12385354                       | (A/C)       |
| 20295       | CakSNP20295    | <i>Kabuli</i>    | <i>Ca_Kabuli_denovo</i>      | 12386113                       | (C/G)       |
| 20296       | CakSNP20296    | <i>Kabuli</i>    | <i>Ca_Kabuli_denovo</i>      | 12387661                       | (C/A)       |
| 20297       | CakSNP20297    | <i>Kabuli</i>    | <i>Ca_Kabuli_denovo</i>      | 12387670                       | (T/C)       |
| 20298       | CakSNP20298    | <i>Kabuli</i>    | <i>Ca_Kabuli_denovo</i>      | 12391385                       | (G/A)       |
| 20299       | CakSNP20299    | <i>Kabuli</i>    | <i>Ca_Kabuli_denovo</i>      | 12391414                       | (G/A)       |
| 20300       | CakSNP20300    | <i>Kabuli</i>    | <i>Ca_Kabuli_denovo</i>      | 12394679                       | (T/C)       |
| 20301       | CakSNP20301    | <i>Kabuli</i>    | <i>Ca_Kabuli_denovo</i>      | 12394728                       | (G/C)       |
| 20302       | CakSNP20302    | <i>Kabuli</i>    | <i>Ca_Kabuli_denovo</i>      | 12394732                       | (C/T)       |
| 20303       | CakSNP20303    | <i>Kabuli</i>    | <i>Ca_Kabuli_denovo</i>      | 12404927                       | (A/G)       |
| 20304       | CakSNP20304    | <i>Kabuli</i>    | <i>Ca_Kabuli_denovo</i>      | 12411157                       | (C/G)       |
| 20305       | CakSNP20305    | <i>Kabuli</i>    | <i>Ca_Kabuli_denovo</i>      | 12415971                       | (C/T)       |
| 20306       | CakSNP20306    | <i>Kabuli</i>    | <i>Ca_Kabuli_denovo</i>      | 12417288                       | (C/A)       |
| 20307       | CakSNP20307    | <i>Kabuli</i>    | <i>Ca_Kabuli_denovo</i>      | 12417294                       | (G/C)       |
| 20308       | CakSNP20308    | <i>Kabuli</i>    | <i>Ca_Kabuli_denovo</i>      | 12420048                       | (G/C)       |
| 20309       | CakSNP20309    | <i>Kabuli</i>    | <i>Ca_Kabuli_denovo</i>      | 12422409                       | (C/G)       |
| 20310       | CakSNP20310    | <i>Kabuli</i>    | <i>Ca_Kabuli_denovo</i>      | 12422413                       | (A/C)       |
| 20311       | CakSNP20311    | <i>Kabuli</i>    | <i>Ca_Kabuli_denovo</i>      | 12424936                       | (C/T)       |
| 20312       | CakSNP20312    | <i>Kabuli</i>    | <i>Ca_Kabuli_denovo</i>      | 12424968                       | (A/T)       |
| 20313       | CakSNP20313    | <i>Kabuli</i>    | <i>Ca_Kabuli_denovo</i>      | 12431462                       | (C/T)       |
| 20314       | CakSNP20314    | <i>Kabuli</i>    | <i>Ca_Kabuli_denovo</i>      | 12440976                       | (C/T)       |
| 20315       | CakSNP20315    | <i>Kabuli</i>    | <i>Ca_Kabuli_denovo</i>      | 12449927                       | (T/C)       |
| 20316       | CakSNP20316    | <i>Kabuli</i>    | <i>Ca_Kabuli_denovo</i>      | 12449999                       | (C/T)       |
| 20317       | CakSNP20317    | <i>Kabuli</i>    | <i>Ca_Kabuli_denovo</i>      | 12450760                       | (A/G)       |

| <b>S.N.</b> | <b>SNP IDs</b> | <b>Cultivars</b> | <b>Chromosomes/scaffolds</b> | <b>Physical positions (bp)</b> | <b>SNPs</b> |
|-------------|----------------|------------------|------------------------------|--------------------------------|-------------|
| 20318       | CakSNP20318    | <i>Kabuli</i>    | <i>Ca_Kabuli_denovo</i>      | 12450818                       | (G/C)       |
| 20319       | CakSNP20319    | <i>Kabuli</i>    | <i>Ca_Kabuli_denovo</i>      | 12450967                       | (C/T)       |
| 20320       | CakSNP20320    | <i>Kabuli</i>    | <i>Ca_Kabuli_denovo</i>      | 12450989                       | (A/G)       |
| 20321       | CakSNP20321    | <i>Kabuli</i>    | <i>Ca_Kabuli_denovo</i>      | 12467411                       | (A/G)       |
| 20322       | CakSNP20322    | <i>Kabuli</i>    | <i>Ca_Kabuli_denovo</i>      | 12468098                       | (C/G)       |
| 20323       | CakSNP20323    | <i>Kabuli</i>    | <i>Ca_Kabuli_denovo</i>      | 12471420                       | (T/C)       |
| 20324       | CakSNP20324    | <i>Kabuli</i>    | <i>Ca_Kabuli_denovo</i>      | 12472768                       | (G/A)       |
| 20325       | CakSNP20325    | <i>Kabuli</i>    | <i>Ca_Kabuli_denovo</i>      | 12473457                       | (A/G)       |
| 20326       | CakSNP20326    | <i>Kabuli</i>    | <i>Ca_Kabuli_denovo</i>      | 12484829                       | (T/G)       |
| 20327       | CakSNP20327    | <i>Kabuli</i>    | <i>Ca_Kabuli_denovo</i>      | 12485751                       | (A/G)       |
| 20328       | CakSNP20328    | <i>Kabuli</i>    | <i>Ca_Kabuli_denovo</i>      | 12485766                       | (C/T)       |
| 20329       | CakSNP20329    | <i>Kabuli</i>    | <i>Ca_Kabuli_denovo</i>      | 12486851                       | (A/G)       |
| 20330       | CakSNP20330    | <i>Kabuli</i>    | <i>Ca_Kabuli_denovo</i>      | 12486854                       | (G/A)       |
| 20331       | CakSNP20331    | <i>Kabuli</i>    | <i>Ca_Kabuli_denovo</i>      | 12487619                       | (C/T)       |
| 20332       | CakSNP20332    | <i>Kabuli</i>    | <i>Ca_Kabuli_denovo</i>      | 12487668                       | (A/G)       |
| 20333       | CakSNP20333    | <i>Kabuli</i>    | <i>Ca_Kabuli_denovo</i>      | 12496808                       | (C/T)       |
| 20334       | CakSNP20334    | <i>Kabuli</i>    | <i>Ca_Kabuli_denovo</i>      | 12500463                       | (G/A)       |
| 20335       | CakSNP20335    | <i>Kabuli</i>    | <i>Ca_Kabuli_denovo</i>      | 12500466                       | (G/C)       |
| 20336       | CakSNP20336    | <i>Kabuli</i>    | <i>Ca_Kabuli_denovo</i>      | 12502746                       | (A/T)       |
| 20337       | CakSNP20337    | <i>Kabuli</i>    | <i>Ca_Kabuli_denovo</i>      | 12505149                       | (G/T)       |
| 20338       | CakSNP20338    | <i>Kabuli</i>    | <i>Ca_Kabuli_denovo</i>      | 12506116                       | (A/C)       |
| 20339       | CakSNP20339    | <i>Kabuli</i>    | <i>Ca_Kabuli_denovo</i>      | 12506158                       | (A/G)       |
| 20340       | CakSNP20340    | <i>Kabuli</i>    | <i>Ca_Kabuli_denovo</i>      | 12507925                       | (C/T)       |
| 20341       | CakSNP20341    | <i>Kabuli</i>    | <i>Ca_Kabuli_denovo</i>      | 12514887                       | (A/C)       |
| 20342       | CakSNP20342    | <i>Kabuli</i>    | <i>Ca_Kabuli_denovo</i>      | 12527488                       | (G/C)       |
| 20343       | CakSNP20343    | <i>Kabuli</i>    | <i>Ca_Kabuli_denovo</i>      | 12529187                       | (A/G)       |
| 20344       | CakSNP20344    | <i>Kabuli</i>    | <i>Ca_Kabuli_denovo</i>      | 12530009                       | (C/T)       |
| 20345       | CakSNP20345    | <i>Kabuli</i>    | <i>Ca_Kabuli_denovo</i>      | 12539987                       | (C/T)       |
| 20346       | CakSNP20346    | <i>Kabuli</i>    | <i>Ca_Kabuli_denovo</i>      | 12541576                       | (C/G)       |
| 20347       | CakSNP20347    | <i>Kabuli</i>    | <i>Ca_Kabuli_denovo</i>      | 12550942                       | (C/T)       |
| 20348       | CakSNP20348    | <i>Kabuli</i>    | <i>Ca_Kabuli_denovo</i>      | 12562412                       | (C/T)       |
| 20349       | CakSNP20349    | <i>Kabuli</i>    | <i>Ca_Kabuli_denovo</i>      | 12562414                       | (G/A)       |
| 20350       | CakSNP20350    | <i>Kabuli</i>    | <i>Ca_Kabuli_denovo</i>      | 12567144                       | (T/C)       |
| 20351       | CakSNP20351    | <i>Kabuli</i>    | <i>Ca_Kabuli_denovo</i>      | 12568213                       | (A/G)       |
| 20352       | CakSNP20352    | <i>Kabuli</i>    | <i>Ca_Kabuli_denovo</i>      | 12568222                       | (G/A)       |
| 20353       | CakSNP20353    | <i>Kabuli</i>    | <i>Ca_Kabuli_denovo</i>      | 12572669                       | (A/C)       |
| 20354       | CakSNP20354    | <i>Kabuli</i>    | <i>Ca_Kabuli_denovo</i>      | 12572691                       | (C/T)       |
| 20355       | CakSNP20355    | <i>Kabuli</i>    | <i>Ca_Kabuli_denovo</i>      | 12578294                       | (T/C)       |
| 20356       | CakSNP20356    | <i>Kabuli</i>    | <i>Ca_Kabuli_denovo</i>      | 12578300                       | (A/C)       |

| <b>S.N.</b> | <b>SNP IDs</b> | <b>Cultivars</b> | <b>Chromosomes/scaffolds</b> | <b>Physical positions (bp)</b> | <b>SNPs</b> |
|-------------|----------------|------------------|------------------------------|--------------------------------|-------------|
| 20357       | CakSNP20357    | <i>Kabuli</i>    | <i>Ca_Kabuli_denovo</i>      | 12583593                       | (T/C)       |
| 20358       | CakSNP20358    | <i>Kabuli</i>    | <i>Ca_Kabuli_denovo</i>      | 12588224                       | (G/A)       |
| 20359       | CakSNP20359    | <i>Kabuli</i>    | <i>Ca_Kabuli_denovo</i>      | 12597602                       | (C/T)       |
| 20360       | CakSNP20360    | <i>Kabuli</i>    | <i>Ca_Kabuli_denovo</i>      | 12597680                       | (C/T)       |
| 20361       | CakSNP20361    | <i>Kabuli</i>    | <i>Ca_Kabuli_denovo</i>      | 12597698                       | (A/G)       |
| 20362       | CakSNP20362    | <i>Kabuli</i>    | <i>Ca_Kabuli_denovo</i>      | 12598854                       | (G/A)       |
| 20363       | CakSNP20363    | <i>Kabuli</i>    | <i>Ca_Kabuli_denovo</i>      | 12614448                       | (C/G)       |
| 20364       | CakSNP20364    | <i>Kabuli</i>    | <i>Ca_Kabuli_denovo</i>      | 12614475                       | (T/G)       |
| 20365       | CakSNP20365    | <i>Kabuli</i>    | <i>Ca_Kabuli_denovo</i>      | 12620203                       | (T/G)       |
| 20366       | CakSNP20366    | <i>Kabuli</i>    | <i>Ca_Kabuli_denovo</i>      | 12625088                       | (G/A)       |
| 20367       | CakSNP20367    | <i>Kabuli</i>    | <i>Ca_Kabuli_denovo</i>      | 12630071                       | (G/A)       |
| 20368       | CakSNP20368    | <i>Kabuli</i>    | <i>Ca_Kabuli_denovo</i>      | 12630136                       | (C/G)       |
| 20369       | CakSNP20369    | <i>Kabuli</i>    | <i>Ca_Kabuli_denovo</i>      | 12647378                       | (C/G)       |
| 20370       | CakSNP20370    | <i>Kabuli</i>    | <i>Ca_Kabuli_denovo</i>      | 12647381                       | (C/T)       |
| 20371       | CakSNP20371    | <i>Kabuli</i>    | <i>Ca_Kabuli_denovo</i>      | 12649202                       | (G/C)       |
| 20372       | CakSNP20372    | <i>Kabuli</i>    | <i>Ca_Kabuli_denovo</i>      | 12649208                       | (G/A)       |
| 20373       | CakSNP20373    | <i>Kabuli</i>    | <i>Ca_Kabuli_denovo</i>      | 12655462                       | (A/C)       |
| 20374       | CakSNP20374    | <i>Kabuli</i>    | <i>Ca_Kabuli_denovo</i>      | 12655487                       | (A/C)       |
| 20375       | CakSNP20375    | <i>Kabuli</i>    | <i>Ca_Kabuli_denovo</i>      | 12669133                       | (G/A)       |
| 20376       | CakSNP20376    | <i>Kabuli</i>    | <i>Ca_Kabuli_denovo</i>      | 12672676                       | (T/C)       |
| 20377       | CakSNP20377    | <i>Kabuli</i>    | <i>Ca_Kabuli_denovo</i>      | 12680590                       | (T/G)       |
| 20378       | CakSNP20378    | <i>Kabuli</i>    | <i>Ca_Kabuli_denovo</i>      | 12680643                       | (T/C)       |
| 20379       | CakSNP20379    | <i>Kabuli</i>    | <i>Ca_Kabuli_denovo</i>      | 12681610                       | (G/T)       |
| 20380       | CakSNP20380    | <i>Kabuli</i>    | <i>Ca_Kabuli_denovo</i>      | 12683863                       | (C/A)       |
| 20381       | CakSNP20381    | <i>Kabuli</i>    | <i>Ca_Kabuli_denovo</i>      | 12684098                       | (A/G)       |
| 20382       | CakSNP20382    | <i>Kabuli</i>    | <i>Ca_Kabuli_denovo</i>      | 12684100                       | (C/T)       |
| 20383       | CakSNP20383    | <i>Kabuli</i>    | <i>Ca_Kabuli_denovo</i>      | 12686753                       | (A/G)       |
| 20384       | CakSNP20384    | <i>Kabuli</i>    | <i>Ca_Kabuli_denovo</i>      | 12686758                       | (C/A)       |
| 20385       | CakSNP20385    | <i>Kabuli</i>    | <i>Ca_Kabuli_denovo</i>      | 12688024                       | (C/T)       |
| 20386       | CakSNP20386    | <i>Kabuli</i>    | <i>Ca_Kabuli_denovo</i>      | 12688476                       | (G/C)       |
| 20387       | CakSNP20387    | <i>Kabuli</i>    | <i>Ca_Kabuli_denovo</i>      | 12688489                       | (G/T)       |
| 20388       | CakSNP20388    | <i>Kabuli</i>    | <i>Ca_Kabuli_denovo</i>      | 12689864                       | (G/A)       |
| 20389       | CakSNP20389    | <i>Kabuli</i>    | <i>Ca_Kabuli_denovo</i>      | 12689914                       | (C/T)       |
| 20390       | CakSNP20390    | <i>Kabuli</i>    | <i>Ca_Kabuli_denovo</i>      | 12691912                       | (C/A)       |
| 20391       | CakSNP20391    | <i>Kabuli</i>    | <i>Ca_Kabuli_denovo</i>      | 12691926                       | (C/G)       |
| 20392       | CakSNP20392    | <i>Kabuli</i>    | <i>Ca_Kabuli_denovo</i>      | 12692387                       | (A/G)       |
| 20393       | CakSNP20393    | <i>Kabuli</i>    | <i>Ca_Kabuli_denovo</i>      | 12701219                       | (C/T)       |
| 20394       | CakSNP20394    | <i>Kabuli</i>    | <i>Ca_Kabuli_denovo</i>      | 12701233                       | (A/G)       |
| 20395       | CakSNP20395    | <i>Kabuli</i>    | <i>Ca_Kabuli_denovo</i>      | 12701423                       | (G/A)       |

| <b>S.N.</b> | <b>SNP IDs</b> | <b>Cultivars</b> | <b>Chromosomes/scaffolds</b> | <b>Physical positions (bp)</b> | <b>SNPs</b> |
|-------------|----------------|------------------|------------------------------|--------------------------------|-------------|
| 20396       | CakSNP20396    | <i>Kabuli</i>    | <i>Ca_Kabuli_denovo</i>      | 12711354                       | (C/G)       |
| 20397       | CakSNP20397    | <i>Kabuli</i>    | <i>Ca_Kabuli_denovo</i>      | 12711370                       | (T/C)       |
| 20398       | CakSNP20398    | <i>Kabuli</i>    | <i>Ca_Kabuli_denovo</i>      | 12711403                       | (G/C)       |
| 20399       | CakSNP20399    | <i>Kabuli</i>    | <i>Ca_Kabuli_denovo</i>      | 12712367                       | (A/G)       |
| 20400       | CakSNP20400    | <i>Kabuli</i>    | <i>Ca_Kabuli_denovo</i>      | 12712436                       | (A/G)       |
| 20401       | CakSNP20401    | <i>Kabuli</i>    | <i>Ca_Kabuli_denovo</i>      | 12712492                       | (C/G)       |
| 20402       | CakSNP20402    | <i>Kabuli</i>    | <i>Ca_Kabuli_denovo</i>      | 12719308                       | (C/T)       |
| 20403       | CakSNP20403    | <i>Kabuli</i>    | <i>Ca_Kabuli_denovo</i>      | 12728194                       | (C/A)       |
| 20404       | CakSNP20404    | <i>Kabuli</i>    | <i>Ca_Kabuli_denovo</i>      | 12728235                       | (C/G)       |
| 20405       | CakSNP20405    | <i>Kabuli</i>    | <i>Ca_Kabuli_denovo</i>      | 12728761                       | (G/C)       |
| 20406       | CakSNP20406    | <i>Kabuli</i>    | <i>Ca_Kabuli_denovo</i>      | 12728774                       | (G/C)       |
| 20407       | CakSNP20407    | <i>Kabuli</i>    | <i>Ca_Kabuli_denovo</i>      | 12730181                       | (C/T)       |
| 20408       | CakSNP20408    | <i>Kabuli</i>    | <i>Ca_Kabuli_denovo</i>      | 12735810                       | (A/G)       |
| 20409       | CakSNP20409    | <i>Kabuli</i>    | <i>Ca_Kabuli_denovo</i>      | 12735840                       | (G/A)       |
| 20410       | CakSNP20410    | <i>Kabuli</i>    | <i>Ca_Kabuli_denovo</i>      | 12738518                       | (C/T)       |
| 20411       | CakSNP20411    | <i>Kabuli</i>    | <i>Ca_Kabuli_denovo</i>      | 12738520                       | (T/C)       |
| 20412       | CakSNP20412    | <i>Kabuli</i>    | <i>Ca_Kabuli_denovo</i>      | 12739001                       | (C/G)       |
| 20413       | CakSNP20413    | <i>Kabuli</i>    | <i>Ca_Kabuli_denovo</i>      | 12739011                       | (G/C)       |
| 20414       | CakSNP20414    | <i>Kabuli</i>    | <i>Ca_Kabuli_denovo</i>      | 12739895                       | (T/G)       |
| 20415       | CakSNP20415    | <i>Kabuli</i>    | <i>Ca_Kabuli_denovo</i>      | 12740080                       | (T/G)       |
| 20416       | CakSNP20416    | <i>Kabuli</i>    | <i>Ca_Kabuli_denovo</i>      | 12740138                       | (G/C)       |
| 20417       | CakSNP20417    | <i>Kabuli</i>    | <i>Ca_Kabuli_denovo</i>      | 12748520                       | (T/C)       |
| 20418       | CakSNP20418    | <i>Kabuli</i>    | <i>Ca_Kabuli_denovo</i>      | 12754598                       | (G/A)       |
| 20419       | CakSNP20419    | <i>Kabuli</i>    | <i>Ca_Kabuli_denovo</i>      | 12760788                       | (G/T)       |
| 20420       | CakSNP20420    | <i>Kabuli</i>    | <i>Ca_Kabuli_denovo</i>      | 12763262                       | (C/T)       |
| 20421       | CakSNP20421    | <i>Kabuli</i>    | <i>Ca_Kabuli_denovo</i>      | 12765002                       | (G/C)       |
| 20422       | CakSNP20422    | <i>Kabuli</i>    | <i>Ca_Kabuli_denovo</i>      | 12765006                       | (G/A)       |
| 20423       | CakSNP20423    | <i>Kabuli</i>    | <i>Ca_Kabuli_denovo</i>      | 12767039                       | (A/G)       |
| 20424       | CakSNP20424    | <i>Kabuli</i>    | <i>Ca_Kabuli_denovo</i>      | 12769214                       | (A/T)       |
| 20425       | CakSNP20425    | <i>Kabuli</i>    | <i>Ca_Kabuli_denovo</i>      | 12770684                       | (A/G)       |
| 20426       | CakSNP20426    | <i>Kabuli</i>    | <i>Ca_Kabuli_denovo</i>      | 12770747                       | (C/G)       |
| 20427       | CakSNP20427    | <i>Kabuli</i>    | <i>Ca_Kabuli_denovo</i>      | 12772557                       | (A/G)       |
| 20428       | CakSNP20428    | <i>Kabuli</i>    | <i>Ca_Kabuli_denovo</i>      | 12772584                       | (T/C)       |
| 20429       | CakSNP20429    | <i>Kabuli</i>    | <i>Ca_Kabuli_denovo</i>      | 12776581                       | (G/A)       |
| 20430       | CakSNP20430    | <i>Kabuli</i>    | <i>Ca_Kabuli_denovo</i>      | 12780073                       | (C/A)       |
| 20431       | CakSNP20431    | <i>Kabuli</i>    | <i>Ca_Kabuli_denovo</i>      | 12785221                       | (C/A)       |
| 20432       | CakSNP20432    | <i>Kabuli</i>    | <i>Ca_Kabuli_denovo</i>      | 12785230                       | (G/C)       |
| 20433       | CakSNP20433    | <i>Kabuli</i>    | <i>Ca_Kabuli_denovo</i>      | 12785482                       | (C/G)       |
| 20434       | CakSNP20434    | <i>Kabuli</i>    | <i>Ca_Kabuli_denovo</i>      | 12785515                       | (A/G)       |

| <b>S.N.</b> | <b>SNP IDs</b> | <b>Cultivars</b> | <b>Chromosomes/scaffolds</b> | <b>Physical positions (bp)</b> | <b>SNPs</b> |
|-------------|----------------|------------------|------------------------------|--------------------------------|-------------|
| 20435       | CakSNP20435    | <i>Kabuli</i>    | <i>Ca_Kabuli_denovo</i>      | 12791066                       | (A/G)       |
| 20436       | CakSNP20436    | <i>Kabuli</i>    | <i>Ca_Kabuli_denovo</i>      | 12791067                       | (A/G)       |
| 20437       | CakSNP20437    | <i>Kabuli</i>    | <i>Ca_Kabuli_denovo</i>      | 12793473                       | (T/C)       |
| 20438       | CakSNP20438    | <i>Kabuli</i>    | <i>Ca_Kabuli_denovo</i>      | 12793863                       | (G/A)       |
| 20439       | CakSNP20439    | <i>Kabuli</i>    | <i>Ca_Kabuli_denovo</i>      | 12793884                       | (C/G)       |
| 20440       | CakSNP20440    | <i>Kabuli</i>    | <i>Ca_Kabuli_denovo</i>      | 12795878                       | (C/T)       |
| 20441       | CakSNP20441    | <i>Kabuli</i>    | <i>Ca_Kabuli_denovo</i>      | 12805396                       | (T/C)       |
| 20442       | CakSNP20442    | <i>Kabuli</i>    | <i>Ca_Kabuli_denovo</i>      | 12812076                       | (C/G)       |
| 20443       | CakSNP20443    | <i>Kabuli</i>    | <i>Ca_Kabuli_denovo</i>      | 12812111                       | (A/C)       |
| 20444       | CakSNP20444    | <i>Kabuli</i>    | <i>Ca_Kabuli_denovo</i>      | 12817660                       | (C/T)       |
| 20445       | CakSNP20445    | <i>Kabuli</i>    | <i>Ca_Kabuli_denovo</i>      | 12818175                       | (T/G)       |
| 20446       | CakSNP20446    | <i>Kabuli</i>    | <i>Ca_Kabuli_denovo</i>      | 12829473                       | (G/A)       |
| 20447       | CakSNP20447    | <i>Kabuli</i>    | <i>Ca_Kabuli_denovo</i>      | 12830550                       | (C/G)       |
| 20448       | CakSNP20448    | <i>Kabuli</i>    | <i>Ca_Kabuli_denovo</i>      | 12830559                       | (G/A)       |
| 20449       | CakSNP20449    | <i>Kabuli</i>    | <i>Ca_Kabuli_denovo</i>      | 12832898                       | (C/A)       |
| 20450       | CakSNP20450    | <i>Kabuli</i>    | <i>Ca_Kabuli_denovo</i>      | 12832925                       | (C/G)       |
| 20451       | CakSNP20451    | <i>Kabuli</i>    | <i>Ca_Kabuli_denovo</i>      | 12843699                       | (C/T)       |
| 20452       | CakSNP20452    | <i>Kabuli</i>    | <i>Ca_Kabuli_denovo</i>      | 12843736                       | (T/A)       |
| 20453       | CakSNP20453    | <i>Kabuli</i>    | <i>Ca_Kabuli_denovo</i>      | 12845113                       | (G/T)       |
| 20454       | CakSNP20454    | <i>Kabuli</i>    | <i>Ca_Kabuli_denovo</i>      | 12848545                       | (T/C)       |
| 20455       | CakSNP20455    | <i>Kabuli</i>    | <i>Ca_Kabuli_denovo</i>      | 12850100                       | (T/C)       |
| 20456       | CakSNP20456    | <i>Kabuli</i>    | <i>Ca_Kabuli_denovo</i>      | 12850561                       | (A/G)       |
| 20457       | CakSNP20457    | <i>Kabuli</i>    | <i>Ca_Kabuli_denovo</i>      | 12850591                       | (C/T)       |
| 20458       | CakSNP20458    | <i>Kabuli</i>    | <i>Ca_Kabuli_denovo</i>      | 12854008                       | (A/G)       |
| 20459       | CakSNP20459    | <i>Kabuli</i>    | <i>Ca_Kabuli_denovo</i>      | 12854011                       | (G/C)       |
| 20460       | CakSNP20460    | <i>Kabuli</i>    | <i>Ca_Kabuli_denovo</i>      | 12856834                       | (T/G)       |
| 20461       | CakSNP20461    | <i>Kabuli</i>    | <i>Ca_Kabuli_denovo</i>      | 12860525                       | (G/A)       |
| 20462       | CakSNP20462    | <i>Kabuli</i>    | <i>Ca_Kabuli_denovo</i>      | 12862348                       | (T/G)       |
| 20463       | CakSNP20463    | <i>Kabuli</i>    | <i>Ca_Kabuli_denovo</i>      | 12863560                       | (A/G)       |
| 20464       | CakSNP20464    | <i>Kabuli</i>    | <i>Ca_Kabuli_denovo</i>      | 12865448                       | (C/T)       |
| 20465       | CakSNP20465    | <i>Kabuli</i>    | <i>Ca_Kabuli_denovo</i>      | 12865468                       | (C/T)       |
| 20466       | CakSNP20466    | <i>Kabuli</i>    | <i>Ca_Kabuli_denovo</i>      | 12869255                       | (A/G)       |
| 20467       | CakSNP20467    | <i>Kabuli</i>    | <i>Ca_Kabuli_denovo</i>      | 12871791                       | (C/G)       |
| 20468       | CakSNP20468    | <i>Kabuli</i>    | <i>Ca_Kabuli_denovo</i>      | 12872788                       | (G/A)       |
| 20469       | CakSNP20469    | <i>Kabuli</i>    | <i>Ca_Kabuli_denovo</i>      | 12872842                       | (T/C)       |
| 20470       | CakSNP20470    | <i>Kabuli</i>    | <i>Ca_Kabuli_denovo</i>      | 12876043                       | (A/G)       |
| 20471       | CakSNP20471    | <i>Kabuli</i>    | <i>Ca_Kabuli_denovo</i>      | 12888592                       | (A/C)       |
| 20472       | CakSNP20472    | <i>Kabuli</i>    | <i>Ca_Kabuli_denovo</i>      | 12897255                       | (A/G)       |
| 20473       | CakSNP20473    | <i>Kabuli</i>    | <i>Ca_Kabuli_denovo</i>      | 12899024                       | (T/C)       |

| <b>S.N.</b> | <b>SNP IDs</b> | <b>Cultivars</b> | <b>Chromosomes/scaffolds</b> | <b>Physical positions (bp)</b> | <b>SNPs</b> |
|-------------|----------------|------------------|------------------------------|--------------------------------|-------------|
| 20474       | CakSNP20474    | <i>Kabuli</i>    | <i>Ca_Kabuli_denovo</i>      | 12903398                       | (C/A)       |
| 20475       | CakSNP20475    | <i>Kabuli</i>    | <i>Ca_Kabuli_denovo</i>      | 12903437                       | (C/A)       |
| 20476       | CakSNP20476    | <i>Kabuli</i>    | <i>Ca_Kabuli_denovo</i>      | 12904085                       | (T/C)       |
| 20477       | CakSNP20477    | <i>Kabuli</i>    | <i>Ca_Kabuli_denovo</i>      | 12904118                       | (A/G)       |
| 20478       | CakSNP20478    | <i>Kabuli</i>    | <i>Ca_Kabuli_denovo</i>      | 12910271                       | (C/T)       |
| 20479       | CakSNP20479    | <i>Kabuli</i>    | <i>Ca_Kabuli_denovo</i>      | 12910286                       | (A/G)       |
| 20480       | CakSNP20480    | <i>Kabuli</i>    | <i>Ca_Kabuli_denovo</i>      | 12911244                       | (T/G)       |
| 20481       | CakSNP20481    | <i>Kabuli</i>    | <i>Ca_Kabuli_denovo</i>      | 12911275                       | (A/G)       |
| 20482       | CakSNP20482    | <i>Kabuli</i>    | <i>Ca_Kabuli_denovo</i>      | 12914398                       | (C/T)       |
| 20483       | CakSNP20483    | <i>Kabuli</i>    | <i>Ca_Kabuli_denovo</i>      | 12914424                       | (C/A)       |
| 20484       | CakSNP20484    | <i>Kabuli</i>    | <i>Ca_Kabuli_denovo</i>      | 12927462                       | (A/G)       |
| 20485       | CakSNP20485    | <i>Kabuli</i>    | <i>Ca_Kabuli_denovo</i>      | 12933253                       | (T/C)       |
| 20486       | CakSNP20486    | <i>Kabuli</i>    | <i>Ca_Kabuli_denovo</i>      | 12935128                       | (T/C)       |
| 20487       | CakSNP20487    | <i>Kabuli</i>    | <i>Ca_Kabuli_denovo</i>      | 12935673                       | (C/G)       |
| 20488       | CakSNP20488    | <i>Kabuli</i>    | <i>Ca_Kabuli_denovo</i>      | 12936805                       | (T/C)       |
| 20489       | CakSNP20489    | <i>Kabuli</i>    | <i>Ca_Kabuli_denovo</i>      | 12939572                       | (T/C)       |
| 20490       | CakSNP20490    | <i>Kabuli</i>    | <i>Ca_Kabuli_denovo</i>      | 12939580                       | (G/A)       |
| 20491       | CakSNP20491    | <i>Kabuli</i>    | <i>Ca_Kabuli_denovo</i>      | 12974203                       | (T/C)       |
| 20492       | CakSNP20492    | <i>Kabuli</i>    | <i>Ca_Kabuli_denovo</i>      | 12975846                       | (T/C)       |
| 20493       | CakSNP20493    | <i>Kabuli</i>    | <i>Ca_Kabuli_denovo</i>      | 12976965                       | (C/G)       |
| 20494       | CakSNP20494    | <i>Kabuli</i>    | <i>Ca_Kabuli_denovo</i>      | 12977012                       | (C/G)       |
| 20495       | CakSNP20495    | <i>Kabuli</i>    | <i>Ca_Kabuli_denovo</i>      | 12980401                       | (G/A)       |
| 20496       | CakSNP20496    | <i>Kabuli</i>    | <i>Ca_Kabuli_denovo</i>      | 12980404                       | (G/C)       |
| 20497       | CakSNP20497    | <i>Kabuli</i>    | <i>Ca_Kabuli_denovo</i>      | 12981713                       | (C/T)       |
| 20498       | CakSNP20498    | <i>Kabuli</i>    | <i>Ca_Kabuli_denovo</i>      | 12983088                       | (A/G)       |
| 20499       | CakSNP20499    | <i>Kabuli</i>    | <i>Ca_Kabuli_denovo</i>      | 12997717                       | (G/A)       |
| 20500       | CakSNP20500    | <i>Kabuli</i>    | <i>Ca_Kabuli_denovo</i>      | 13000283                       | (A/C)       |
| 20501       | CakSNP20501    | <i>Kabuli</i>    | <i>Ca_Kabuli_denovo</i>      | 13013951                       | (A/C)       |
| 20502       | CakSNP20502    | <i>Kabuli</i>    | <i>Ca_Kabuli_denovo</i>      | 13013952                       | (G/A)       |
| 20503       | CakSNP20503    | <i>Kabuli</i>    | <i>Ca_Kabuli_denovo</i>      | 13013955                       | (C/T)       |
| 20504       | CakSNP20504    | <i>Kabuli</i>    | <i>Ca_Kabuli_denovo</i>      | 13014166                       | (T/C)       |
| 20505       | CakSNP20505    | <i>Kabuli</i>    | <i>Ca_Kabuli_denovo</i>      | 13016388                       | (C/T)       |
| 20506       | CakSNP20506    | <i>Kabuli</i>    | <i>Ca_Kabuli_denovo</i>      | 13016391                       | (G/C)       |
| 20507       | CakSNP20507    | <i>Kabuli</i>    | <i>Ca_Kabuli_denovo</i>      | 13020665                       | (G/A)       |
| 20508       | CakSNP20508    | <i>Kabuli</i>    | <i>Ca_Kabuli_denovo</i>      | 13021311                       | (G/A)       |
| 20509       | CakSNP20509    | <i>Kabuli</i>    | <i>Ca_Kabuli_denovo</i>      | 13028389                       | (A/G)       |
| 20510       | CakSNP20510    | <i>Kabuli</i>    | <i>Ca_Kabuli_denovo</i>      | 13028463                       | (G/A)       |
| 20511       | CakSNP20511    | <i>Kabuli</i>    | <i>Ca_Kabuli_denovo</i>      | 13030260                       | (G/A)       |
| 20512       | CakSNP20512    | <i>Kabuli</i>    | <i>Ca_Kabuli_denovo</i>      | 13031950                       | (A/C)       |

| <b>S.N.</b> | <b>SNP IDs</b> | <b>Cultivars</b> | <b>Chromosomes/scaffolds</b> | <b>Physical positions (bp)</b> | <b>SNPs</b> |
|-------------|----------------|------------------|------------------------------|--------------------------------|-------------|
| 20513       | CakSNP20513    | <i>Kabuli</i>    | <i>Ca_Kabuli_denovo</i>      | 13032980                       | (G/A)       |
| 20514       | CakSNP20514    | <i>Kabuli</i>    | <i>Ca_Kabuli_denovo</i>      | 13033007                       | (C/T)       |
| 20515       | CakSNP20515    | <i>Kabuli</i>    | <i>Ca_Kabuli_denovo</i>      | 13044230                       | (G/C)       |
| 20516       | CakSNP20516    | <i>Kabuli</i>    | <i>Ca_Kabuli_denovo</i>      | 13047420                       | (G/A)       |
| 20517       | CakSNP20517    | <i>Kabuli</i>    | <i>Ca_Kabuli_denovo</i>      | 13048862                       | (C/T)       |
| 20518       | CakSNP20518    | <i>Kabuli</i>    | <i>Ca_Kabuli_denovo</i>      | 13049519                       | (T/C)       |
| 20519       | CakSNP20519    | <i>Kabuli</i>    | <i>Ca_Kabuli_denovo</i>      | 13051397                       | (C/G)       |
| 20520       | CakSNP20520    | <i>Kabuli</i>    | <i>Ca_Kabuli_denovo</i>      | 13055832                       | (A/G)       |
| 20521       | CakSNP20521    | <i>Kabuli</i>    | <i>Ca_Kabuli_denovo</i>      | 13060385                       | (C/A)       |
| 20522       | CakSNP20522    | <i>Kabuli</i>    | <i>Ca_Kabuli_denovo</i>      | 13060407                       | (G/C)       |
| 20523       | CakSNP20523    | <i>Kabuli</i>    | <i>Ca_Kabuli_denovo</i>      | 13064433                       | (G/A)       |
| 20524       | CakSNP20524    | <i>Kabuli</i>    | <i>Ca_Kabuli_denovo</i>      | 13065262                       | (G/C)       |
| 20525       | CakSNP20525    | <i>Kabuli</i>    | <i>Ca_Kabuli_denovo</i>      | 13082032                       | (G/C)       |
| 20526       | CakSNP20526    | <i>Kabuli</i>    | <i>Ca_Kabuli_denovo</i>      | 13088614                       | (G/C)       |
| 20527       | CakSNP20527    | <i>Kabuli</i>    | <i>Ca_Kabuli_denovo</i>      | 13101486                       | (C/G)       |
| 20528       | CakSNP20528    | <i>Kabuli</i>    | <i>Ca_Kabuli_denovo</i>      | 13101540                       | (G/C)       |
| 20529       | CakSNP20529    | <i>Kabuli</i>    | <i>Ca_Kabuli_denovo</i>      | 13107551                       | (T/G)       |
| 20530       | CakSNP20530    | <i>Kabuli</i>    | <i>Ca_Kabuli_denovo</i>      | 13108297                       | (C/T)       |
| 20531       | CakSNP20531    | <i>Kabuli</i>    | <i>Ca_Kabuli_denovo</i>      | 13108376                       | (A/G)       |
| 20532       | CakSNP20532    | <i>Kabuli</i>    | <i>Ca_Kabuli_denovo</i>      | 13109480                       | (G/C)       |
| 20533       | CakSNP20533    | <i>Kabuli</i>    | <i>Ca_Kabuli_denovo</i>      | 13109533                       | (C/G)       |
| 20534       | CakSNP20534    | <i>Kabuli</i>    | <i>Ca_Kabuli_denovo</i>      | 13113390                       | (A/T)       |
| 20535       | CakSNP20535    | <i>Kabuli</i>    | <i>Ca_Kabuli_denovo</i>      | 13113393                       | (T/C)       |
| 20536       | CakSNP20536    | <i>Kabuli</i>    | <i>Ca_Kabuli_denovo</i>      | 13113408                       | (G/A)       |
| 20537       | CakSNP20537    | <i>Kabuli</i>    | <i>Ca_Kabuli_denovo</i>      | 13114873                       | (A/C)       |
| 20538       | CakSNP20538    | <i>Kabuli</i>    | <i>Ca_Kabuli_denovo</i>      | 13115242                       | (T/C)       |
| 20539       | CakSNP20539    | <i>Kabuli</i>    | <i>Ca_Kabuli_denovo</i>      | 13117588                       | (T/G)       |
| 20540       | CakSNP20540    | <i>Kabuli</i>    | <i>Ca_Kabuli_denovo</i>      | 13117614                       | (A/G)       |
| 20541       | CakSNP20541    | <i>Kabuli</i>    | <i>Ca_Kabuli_denovo</i>      | 13119370                       | (T/C)       |
| 20542       | CakSNP20542    | <i>Kabuli</i>    | <i>Ca_Kabuli_denovo</i>      | 13121866                       | (T/C)       |
| 20543       | CakSNP20543    | <i>Kabuli</i>    | <i>Ca_Kabuli_denovo</i>      | 13121875                       | (A/G)       |
| 20544       | CakSNP20544    | <i>Kabuli</i>    | <i>Ca_Kabuli_denovo</i>      | 13123297                       | (A/G)       |
| 20545       | CakSNP20545    | <i>Kabuli</i>    | <i>Ca_Kabuli_denovo</i>      | 13124552                       | (A/G)       |
| 20546       | CakSNP20546    | <i>Kabuli</i>    | <i>Ca_Kabuli_denovo</i>      | 13124612                       | (G/A)       |
| 20547       | CakSNP20547    | <i>Kabuli</i>    | <i>Ca_Kabuli_denovo</i>      | 13127534                       | (G/T)       |
| 20548       | CakSNP20548    | <i>Kabuli</i>    | <i>Ca_Kabuli_denovo</i>      | 13127558                       | (C/G)       |
| 20549       | CakSNP20549    | <i>Kabuli</i>    | <i>Ca_Kabuli_denovo</i>      | 13131624                       | (G/A)       |
| 20550       | CakSNP20550    | <i>Kabuli</i>    | <i>Ca_Kabuli_denovo</i>      | 13131674                       | (G/A)       |
| 20551       | CakSNP20551    | <i>Kabuli</i>    | <i>Ca_Kabuli_denovo</i>      | 13138680                       | (A/G)       |



| <b>S.N.</b> | <b>SNP IDs</b> | <b>Cultivars</b> | <b>Chromosomes/scaffolds</b> | <b>Physical positions (bp)</b> | <b>SNPs</b> |
|-------------|----------------|------------------|------------------------------|--------------------------------|-------------|
| 20552       | CakSNP20552    | <i>Kabuli</i>    | <i>Ca_Kabuli_denovo</i>      | 13138756                       | (G/A)       |
| 20553       | CakSNP20553    | <i>Kabuli</i>    | <i>Ca_Kabuli_denovo</i>      | 13141952                       | (T/C)       |
| 20554       | CakSNP20554    | <i>Kabuli</i>    | <i>Ca_Kabuli_denovo</i>      | 13143666                       | (C/G)       |
| 20555       | CakSNP20555    | <i>Kabuli</i>    | <i>Ca_Kabuli_denovo</i>      | 13145752                       | (T/G)       |
| 20556       | CakSNP20556    | <i>Kabuli</i>    | <i>Ca_Kabuli_denovo</i>      | 13145765                       | (C/T)       |
| 20557       | CakSNP20557    | <i>Kabuli</i>    | <i>Ca_Kabuli_denovo</i>      | 13146212                       | (A/T)       |
| 20558       | CakSNP20558    | <i>Kabuli</i>    | <i>Ca_Kabuli_denovo</i>      | 13146263                       | (T/A)       |
| 20559       | CakSNP20559    | <i>Kabuli</i>    | <i>Ca_Kabuli_denovo</i>      | 13147196                       | (A/G)       |
| 20560       | CakSNP20560    | <i>Kabuli</i>    | <i>Ca_Kabuli_denovo</i>      | 13147202                       | (G/A)       |
| 20561       | CakSNP20561    | <i>Kabuli</i>    | <i>Ca_Kabuli_denovo</i>      | 13155547                       | (G/T)       |
| 20562       | CakSNP20562    | <i>Kabuli</i>    | <i>Ca_Kabuli_denovo</i>      | 13162784                       | (G/C)       |
| 20563       | CakSNP20563    | <i>Kabuli</i>    | <i>Ca_Kabuli_denovo</i>      | 13169513                       | (C/T)       |
| 20564       | CakSNP20564    | <i>Kabuli</i>    | <i>Ca_Kabuli_denovo</i>      | 13169527                       | (C/T)       |
| 20565       | CakSNP20565    | <i>Kabuli</i>    | <i>Ca_Kabuli_denovo</i>      | 13171259                       | (A/G)       |
| 20566       | CakSNP20566    | <i>Kabuli</i>    | <i>Ca_Kabuli_denovo</i>      | 13171283                       | (A/G)       |
| 20567       | CakSNP20567    | <i>Kabuli</i>    | <i>Ca_Kabuli_denovo</i>      | 13172040                       | (A/G)       |
| 20568       | CakSNP20568    | <i>Kabuli</i>    | <i>Ca_Kabuli_denovo</i>      | 13173271                       | (C/T)       |
| 20569       | CakSNP20569    | <i>Kabuli</i>    | <i>Ca_Kabuli_denovo</i>      | 13173276                       | (G/A)       |
| 20570       | CakSNP20570    | <i>Kabuli</i>    | <i>Ca_Kabuli_denovo</i>      | 13178980                       | (C/G)       |
| 20571       | CakSNP20571    | <i>Kabuli</i>    | <i>Ca_Kabuli_denovo</i>      | 13179014                       | (C/G)       |
| 20572       | CakSNP20572    | <i>Kabuli</i>    | <i>Ca_Kabuli_denovo</i>      | 13182701                       | (C/G)       |
| 20573       | CakSNP20573    | <i>Kabuli</i>    | <i>Ca_Kabuli_denovo</i>      | 13184993                       | (G/C)       |
| 20574       | CakSNP20574    | <i>Kabuli</i>    | <i>Ca_Kabuli_denovo</i>      | 13187926                       | (C/T)       |
| 20575       | CakSNP20575    | <i>Kabuli</i>    | <i>Ca_Kabuli_denovo</i>      | 13189933                       | (A/G)       |
| 20576       | CakSNP20576    | <i>Kabuli</i>    | <i>Ca_Kabuli_denovo</i>      | 13194655                       | (A/C)       |
| 20577       | CakSNP20577    | <i>Kabuli</i>    | <i>Ca_Kabuli_denovo</i>      | 13198712                       | (T/C)       |
| 20578       | CakSNP20578    | <i>Kabuli</i>    | <i>Ca_Kabuli_denovo</i>      | 13198718                       | (C/T)       |
| 20579       | CakSNP20579    | <i>Kabuli</i>    | <i>Ca_Kabuli_denovo</i>      | 13203576                       | (T/G)       |
| 20580       | CakSNP20580    | <i>Kabuli</i>    | <i>Ca_Kabuli_denovo</i>      | 13205570                       | (T/C)       |
| 20581       | CakSNP20581    | <i>Kabuli</i>    | <i>Ca_Kabuli_denovo</i>      | 13205676                       | (A/C)       |
| 20582       | CakSNP20582    | <i>Kabuli</i>    | <i>Ca_Kabuli_denovo</i>      | 13206342                       | (G/C)       |
| 20583       | CakSNP20583    | <i>Kabuli</i>    | <i>Ca_Kabuli_denovo</i>      | 13208511                       | (A/C)       |
| 20584       | CakSNP20584    | <i>Kabuli</i>    | <i>Ca_Kabuli_denovo</i>      | 13208512                       | (G/A)       |
| 20585       | CakSNP20585    | <i>Kabuli</i>    | <i>Ca_Kabuli_denovo</i>      | 13211264                       | (A/G)       |
| 20586       | CakSNP20586    | <i>Kabuli</i>    | <i>Ca_Kabuli_denovo</i>      | 13219900                       | (G/T)       |
| 20587       | CakSNP20587    | <i>Kabuli</i>    | <i>Ca_Kabuli_denovo</i>      | 13220434                       | (C/T)       |
| 20588       | CakSNP20588    | <i>Kabuli</i>    | <i>Ca_Kabuli_denovo</i>      | 13220440                       | (A/G)       |
| 20589       | CakSNP20589    | <i>Kabuli</i>    | <i>Ca_Kabuli_denovo</i>      | 13223422                       | (C/G)       |
| 20590       | CakSNP20590    | <i>Kabuli</i>    | <i>Ca_Kabuli_denovo</i>      | 13223458                       | (C/T)       |

| <b>S.N.</b> | <b>SNP IDs</b> | <b>Cultivars</b> | <b>Chromosomes/scaffolds</b> | <b>Physical positions (bp)</b> | <b>SNPs</b> |
|-------------|----------------|------------------|------------------------------|--------------------------------|-------------|
| 20591       | CakSNP20591    | <i>Kabuli</i>    | <i>Ca_Kabuli_denovo</i>      | 13233187                       | (T/A)       |
| 20592       | CakSNP20592    | <i>Kabuli</i>    | <i>Ca_Kabuli_denovo</i>      | 13233773                       | (C/T)       |
| 20593       | CakSNP20593    | <i>Kabuli</i>    | <i>Ca_Kabuli_denovo</i>      | 13236038                       | (A/C)       |
| 20594       | CakSNP20594    | <i>Kabuli</i>    | <i>Ca_Kabuli_denovo</i>      | 13236125                       | (T/C)       |
| 20595       | CakSNP20595    | <i>Kabuli</i>    | <i>Ca_Kabuli_denovo</i>      | 13236608                       | (A/G)       |
| 20596       | CakSNP20596    | <i>Kabuli</i>    | <i>Ca_Kabuli_denovo</i>      | 13243606                       | (G/T)       |
| 20597       | CakSNP20597    | <i>Kabuli</i>    | <i>Ca_Kabuli_denovo</i>      | 13243624                       | (C/A)       |
| 20598       | CakSNP20598    | <i>Kabuli</i>    | <i>Ca_Kabuli_denovo</i>      | 13255115                       | (G/A)       |
| 20599       | CakSNP20599    | <i>Kabuli</i>    | <i>Ca_Kabuli_denovo</i>      | 13256716                       | (C/T)       |
| 20600       | CakSNP20600    | <i>Kabuli</i>    | <i>Ca_Kabuli_denovo</i>      | 13257182                       | (A/G)       |
| 20601       | CakSNP20601    | <i>Kabuli</i>    | <i>Ca_Kabuli_denovo</i>      | 13257218                       | (C/T)       |
| 20602       | CakSNP20602    | <i>Kabuli</i>    | <i>Ca_Kabuli_denovo</i>      | 13257741                       | (G/C)       |
| 20603       | CakSNP20603    | <i>Kabuli</i>    | <i>Ca_Kabuli_denovo</i>      | 13257752                       | (C/T)       |
| 20604       | CakSNP20604    | <i>Kabuli</i>    | <i>Ca_Kabuli_denovo</i>      | 13262646                       | (C/T)       |
| 20605       | CakSNP20605    | <i>Kabuli</i>    | <i>Ca_Kabuli_denovo</i>      | 13262682                       | (G/C)       |
| 20606       | CakSNP20606    | <i>Kabuli</i>    | <i>Ca_Kabuli_denovo</i>      | 13263857                       | (C/G)       |
| 20607       | CakSNP20607    | <i>Kabuli</i>    | <i>Ca_Kabuli_denovo</i>      | 13263881                       | (T/C)       |
| 20608       | CakSNP20608    | <i>Kabuli</i>    | <i>Ca_Kabuli_denovo</i>      | 13265069                       | (T/C)       |
| 20609       | CakSNP20609    | <i>Kabuli</i>    | <i>Ca_Kabuli_denovo</i>      | 13265087                       | (G/C)       |
| 20610       | CakSNP20610    | <i>Kabuli</i>    | <i>Ca_Kabuli_denovo</i>      | 13265898                       | (A/G)       |
| 20611       | CakSNP20611    | <i>Kabuli</i>    | <i>Ca_Kabuli_denovo</i>      | 13265931                       | (G/A)       |
| 20612       | CakSNP20612    | <i>Kabuli</i>    | <i>Ca_Kabuli_denovo</i>      | 13266100                       | (T/C)       |
| 20613       | CakSNP20613    | <i>Kabuli</i>    | <i>Ca_Kabuli_denovo</i>      | 13266130                       | (A/T)       |
| 20614       | CakSNP20614    | <i>Kabuli</i>    | <i>Ca_Kabuli_denovo</i>      | 13268055                       | (T/C)       |
| 20615       | CakSNP20615    | <i>Kabuli</i>    | <i>Ca_Kabuli_denovo</i>      | 13268076                       | (G/T)       |
| 20616       | CakSNP20616    | <i>Kabuli</i>    | <i>Ca_Kabuli_denovo</i>      | 13271245                       | (A/G)       |
| 20617       | CakSNP20617    | <i>Kabuli</i>    | <i>Ca_Kabuli_denovo</i>      | 13271253                       | (T/C)       |
| 20618       | CakSNP20618    | <i>Kabuli</i>    | <i>Ca_Kabuli_denovo</i>      | 13274178                       | (C/A)       |
| 20619       | CakSNP20619    | <i>Kabuli</i>    | <i>Ca_Kabuli_denovo</i>      | 13274216                       | (C/G)       |
| 20620       | CakSNP20620    | <i>Kabuli</i>    | <i>Ca_Kabuli_denovo</i>      | 13281091                       | (T/A)       |
| 20621       | CakSNP20621    | <i>Kabuli</i>    | <i>Ca_Kabuli_denovo</i>      | 13283664                       | (C/A)       |
| 20622       | CakSNP20622    | <i>Kabuli</i>    | <i>Ca_Kabuli_denovo</i>      | 13291126                       | (C/A)       |
| 20623       | CakSNP20623    | <i>Kabuli</i>    | <i>Ca_Kabuli_denovo</i>      | 13298005                       | (C/T)       |
| 20624       | CakSNP20624    | <i>Kabuli</i>    | <i>Ca_Kabuli_denovo</i>      | 13299371                       | (A/T)       |
| 20625       | CakSNP20625    | <i>Kabuli</i>    | <i>Ca_Kabuli_denovo</i>      | 13299943                       | (G/A)       |
| 20626       | CakSNP20626    | <i>Kabuli</i>    | <i>Ca_Kabuli_denovo</i>      | 13300502                       | (C/T)       |
| 20627       | CakSNP20627    | <i>Kabuli</i>    | <i>Ca_Kabuli_denovo</i>      | 13300525                       | (C/T)       |
| 20628       | CakSNP20628    | <i>Kabuli</i>    | <i>Ca_Kabuli_denovo</i>      | 13302088                       | (G/T)       |
| 20629       | CakSNP20629    | <i>Kabuli</i>    | <i>Ca_Kabuli_denovo</i>      | 13302097                       | (A/G)       |

| <b>S.N.</b> | <b>SNP IDs</b> | <b>Cultivars</b> | <b>Chromosomes/scaffolds</b> | <b>Physical positions (bp)</b> | <b>SNPs</b> |
|-------------|----------------|------------------|------------------------------|--------------------------------|-------------|
| 20630       | CakSNP20630    | <i>Kabuli</i>    | <i>Ca_Kabuli_denovo</i>      | 13305822                       | (C/T)       |
| 20631       | CakSNP20631    | <i>Kabuli</i>    | <i>Ca_Kabuli_denovo</i>      | 13309255                       | (A/G)       |
| 20632       | CakSNP20632    | <i>Kabuli</i>    | <i>Ca_Kabuli_denovo</i>      | 13309265                       | (T/C)       |
| 20633       | CakSNP20633    | <i>Kabuli</i>    | <i>Ca_Kabuli_denovo</i>      | 13318048                       | (T/C)       |
| 20634       | CakSNP20634    | <i>Kabuli</i>    | <i>Ca_Kabuli_denovo</i>      | 13321431                       | (G/C)       |
| 20635       | CakSNP20635    | <i>Kabuli</i>    | <i>Ca_Kabuli_denovo</i>      | 13321444                       | (T/A)       |
| 20636       | CakSNP20636    | <i>Kabuli</i>    | <i>Ca_Kabuli_denovo</i>      | 13326443                       | (T/A)       |
| 20637       | CakSNP20637    | <i>Kabuli</i>    | <i>Ca_Kabuli_denovo</i>      | 13326470                       | (A/G)       |
| 20638       | CakSNP20638    | <i>Kabuli</i>    | <i>Ca_Kabuli_denovo</i>      | 13331285                       | (A/G)       |
| 20639       | CakSNP20639    | <i>Kabuli</i>    | <i>Ca_Kabuli_denovo</i>      | 13331312                       | (C/G)       |
| 20640       | CakSNP20640    | <i>Kabuli</i>    | <i>Ca_Kabuli_denovo</i>      | 13338641                       | (A/C)       |
| 20641       | CakSNP20641    | <i>Kabuli</i>    | <i>Ca_Kabuli_denovo</i>      | 13338649                       | (T/G)       |
| 20642       | CakSNP20642    | <i>Kabuli</i>    | <i>Ca_Kabuli_denovo</i>      | 13342906                       | (A/G)       |
| 20643       | CakSNP20643    | <i>Kabuli</i>    | <i>Ca_Kabuli_denovo</i>      | 13347586                       | (G/C)       |
| 20644       | CakSNP20644    | <i>Kabuli</i>    | <i>Ca_Kabuli_denovo</i>      | 13347619                       | (C/T)       |
| 20645       | CakSNP20645    | <i>Kabuli</i>    | <i>Ca_Kabuli_denovo</i>      | 13350368                       | (G/C)       |
| 20646       | CakSNP20646    | <i>Kabuli</i>    | <i>Ca_Kabuli_denovo</i>      | 13350390                       | (A/G)       |
| 20647       | CakSNP20647    | <i>Kabuli</i>    | <i>Ca_Kabuli_denovo</i>      | 13350733                       | (A/G)       |
| 20648       | CakSNP20648    | <i>Kabuli</i>    | <i>Ca_Kabuli_denovo</i>      | 13350766                       | (T/C)       |
| 20649       | CakSNP20649    | <i>Kabuli</i>    | <i>Ca_Kabuli_denovo</i>      | 13351946                       | (A/G)       |
| 20650       | CakSNP20650    | <i>Kabuli</i>    | <i>Ca_Kabuli_denovo</i>      | 13354654                       | (C/G)       |
| 20651       | CakSNP20651    | <i>Kabuli</i>    | <i>Ca_Kabuli_denovo</i>      | 13361155                       | (T/C)       |
| 20652       | CakSNP20652    | <i>Kabuli</i>    | <i>Ca_Kabuli_denovo</i>      | 13368691                       | (G/T)       |
| 20653       | CakSNP20653    | <i>Kabuli</i>    | <i>Ca_Kabuli_denovo</i>      | 13373609                       | (C/T)       |
| 20654       | CakSNP20654    | <i>Kabuli</i>    | <i>Ca_Kabuli_denovo</i>      | 13373661                       | (G/A)       |
| 20655       | CakSNP20655    | <i>Kabuli</i>    | <i>Ca_Kabuli_denovo</i>      | 13375276                       | (T/C)       |
| 20656       | CakSNP20656    | <i>Kabuli</i>    | <i>Ca_Kabuli_denovo</i>      | 13376177                       | (C/T)       |
| 20657       | CakSNP20657    | <i>Kabuli</i>    | <i>Ca_Kabuli_denovo</i>      | 13376187                       | (C/T)       |
| 20658       | CakSNP20658    | <i>Kabuli</i>    | <i>Ca_Kabuli_denovo</i>      | 13390756                       | (T/C)       |
| 20659       | CakSNP20659    | <i>Kabuli</i>    | <i>Ca_Kabuli_denovo</i>      | 13390759                       | (A/G)       |
| 20660       | CakSNP20660    | <i>Kabuli</i>    | <i>Ca_Kabuli_denovo</i>      | 13400505                       | (T/C)       |
| 20661       | CakSNP20661    | <i>Kabuli</i>    | <i>Ca_Kabuli_denovo</i>      | 13400514                       | (C/A)       |
| 20662       | CakSNP20662    | <i>Kabuli</i>    | <i>Ca_Kabuli_denovo</i>      | 13402676                       | (C/T)       |
| 20663       | CakSNP20663    | <i>Kabuli</i>    | <i>Ca_Kabuli_denovo</i>      | 13402685                       | (C/T)       |
| 20664       | CakSNP20664    | <i>Kabuli</i>    | <i>Ca_Kabuli_denovo</i>      | 13402948                       | (T/C)       |
| 20665       | CakSNP20665    | <i>Kabuli</i>    | <i>Ca_Kabuli_denovo</i>      | 13402956                       | (G/C)       |
| 20666       | CakSNP20666    | <i>Kabuli</i>    | <i>Ca_Kabuli_denovo</i>      | 13402957                       | (C/T)       |
| 20667       | CakSNP20667    | <i>Kabuli</i>    | <i>Ca_Kabuli_denovo</i>      | 13403374                       | (C/T)       |
| 20668       | CakSNP20668    | <i>Kabuli</i>    | <i>Ca_Kabuli_denovo</i>      | 13404299                       | (C/T)       |

| <b>S.N.</b> | <b>SNP IDs</b> | <b>Cultivars</b> | <b>Chromosomes/scaffolds</b> | <b>Physical positions (bp)</b> | <b>SNPs</b> |
|-------------|----------------|------------------|------------------------------|--------------------------------|-------------|
| 20669       | CakSNP20669    | <i>Kabuli</i>    | <i>Ca_Kabuli_denovo</i>      | 13405999                       | (T/C)       |
| 20670       | CakSNP20670    | <i>Kabuli</i>    | <i>Ca_Kabuli_denovo</i>      | 13408133                       | (G/A)       |
| 20671       | CakSNP20671    | <i>Kabuli</i>    | <i>Ca_Kabuli_denovo</i>      | 13413523                       | (C/T)       |
| 20672       | CakSNP20672    | <i>Kabuli</i>    | <i>Ca_Kabuli_denovo</i>      | 13421129                       | (A/G)       |
| 20673       | CakSNP20673    | <i>Kabuli</i>    | <i>Ca_Kabuli_denovo</i>      | 13423674                       | (G/A)       |
| 20674       | CakSNP20674    | <i>Kabuli</i>    | <i>Ca_Kabuli_denovo</i>      | 13424125                       | (A/T)       |
| 20675       | CakSNP20675    | <i>Kabuli</i>    | <i>Ca_Kabuli_denovo</i>      | 13425959                       | (C/G)       |
| 20676       | CakSNP20676    | <i>Kabuli</i>    | <i>Ca_Kabuli_denovo</i>      | 13431139                       | (T/C)       |
| 20677       | CakSNP20677    | <i>Kabuli</i>    | <i>Ca_Kabuli_denovo</i>      | 13434517                       | (C/G)       |
| 20678       | CakSNP20678    | <i>Kabuli</i>    | <i>Ca_Kabuli_denovo</i>      | 13437430                       | (T/C)       |
| 20679       | CakSNP20679    | <i>Kabuli</i>    | <i>Ca_Kabuli_denovo</i>      | 13438296                       | (C/A)       |
| 20680       | CakSNP20680    | <i>Kabuli</i>    | <i>Ca_Kabuli_denovo</i>      | 13444653                       | (A/G)       |
| 20681       | CakSNP20681    | <i>Kabuli</i>    | <i>Ca_Kabuli_denovo</i>      | 13449681                       | (C/T)       |
| 20682       | CakSNP20682    | <i>Kabuli</i>    | <i>Ca_Kabuli_denovo</i>      | 13450012                       | (G/A)       |
| 20683       | CakSNP20683    | <i>Kabuli</i>    | <i>Ca_Kabuli_denovo</i>      | 13451539                       | (T/C)       |
| 20684       | CakSNP20684    | <i>Kabuli</i>    | <i>Ca_Kabuli_denovo</i>      | 13451572                       | (G/T)       |
| 20685       | CakSNP20685    | <i>Kabuli</i>    | <i>Ca_Kabuli_denovo</i>      | 13452839                       | (A/G)       |
| 20686       | CakSNP20686    | <i>Kabuli</i>    | <i>Ca_Kabuli_denovo</i>      | 13462372                       | (A/C)       |
| 20687       | CakSNP20687    | <i>Kabuli</i>    | <i>Ca_Kabuli_denovo</i>      | 13465634                       | (C/G)       |
| 20688       | CakSNP20688    | <i>Kabuli</i>    | <i>Ca_Kabuli_denovo</i>      | 13467173                       | (G/A)       |
| 20689       | CakSNP20689    | <i>Kabuli</i>    | <i>Ca_Kabuli_denovo</i>      | 13475729                       | (C/T)       |
| 20690       | CakSNP20690    | <i>Kabuli</i>    | <i>Ca_Kabuli_denovo</i>      | 13475780                       | (T/C)       |
| 20691       | CakSNP20691    | <i>Kabuli</i>    | <i>Ca_Kabuli_denovo</i>      | 13477849                       | (T/C)       |
| 20692       | CakSNP20692    | <i>Kabuli</i>    | <i>Ca_Kabuli_denovo</i>      | 13477879                       | (C/T)       |
| 20693       | CakSNP20693    | <i>Kabuli</i>    | <i>Ca_Kabuli_denovo</i>      | 13482416                       | (C/T)       |
| 20694       | CakSNP20694    | <i>Kabuli</i>    | <i>Ca_Kabuli_denovo</i>      | 13483653                       | (C/G)       |
| 20695       | CakSNP20695    | <i>Kabuli</i>    | <i>Ca_Kabuli_denovo</i>      | 13483915                       | (C/T)       |
| 20696       | CakSNP20696    | <i>Kabuli</i>    | <i>Ca_Kabuli_denovo</i>      | 13483957                       | (C/T)       |
| 20697       | CakSNP20697    | <i>Kabuli</i>    | <i>Ca_Kabuli_denovo</i>      | 13484597                       | (G/A)       |
| 20698       | CakSNP20698    | <i>Kabuli</i>    | <i>Ca_Kabuli_denovo</i>      | 13486160                       | (G/A)       |
| 20699       | CakSNP20699    | <i>Kabuli</i>    | <i>Ca_Kabuli_denovo</i>      | 13486322                       | (C/T)       |
| 20700       | CakSNP20700    | <i>Kabuli</i>    | <i>Ca_Kabuli_denovo</i>      | 13487264                       | (C/T)       |
| 20701       | CakSNP20701    | <i>Kabuli</i>    | <i>Ca_Kabuli_denovo</i>      | 13487276                       | (C/T)       |
| 20702       | CakSNP20702    | <i>Kabuli</i>    | <i>Ca_Kabuli_denovo</i>      | 13489767                       | (C/G)       |
| 20703       | CakSNP20703    | <i>Kabuli</i>    | <i>Ca_Kabuli_denovo</i>      | 13489770                       | (A/G)       |
| 20704       | CakSNP20704    | <i>Kabuli</i>    | <i>Ca_Kabuli_denovo</i>      | 13489794                       | (C/T)       |
| 20705       | CakSNP20705    | <i>Kabuli</i>    | <i>Ca_Kabuli_denovo</i>      | 13494557                       | (G/C)       |
| 20706       | CakSNP20706    | <i>Kabuli</i>    | <i>Ca_Kabuli_denovo</i>      | 13494571                       | (A/G)       |
| 20707       | CakSNP20707    | <i>Kabuli</i>    | <i>Ca_Kabuli_denovo</i>      | 13500382                       | (C/A)       |

| <b>S.N.</b> | <b>SNP IDs</b> | <b>Cultivars</b> | <b>Chromosomes/scaffolds</b> | <b>Physical positions (bp)</b> | <b>SNPs</b> |
|-------------|----------------|------------------|------------------------------|--------------------------------|-------------|
| 20708       | CakSNP20708    | <i>Kabuli</i>    | <i>Ca_Kabuli_denovo</i>      | 13511809                       | (A/G)       |
| 20709       | CakSNP20709    | <i>Kabuli</i>    | <i>Ca_Kabuli_denovo</i>      | 13511857                       | (A/G)       |
| 20710       | CakSNP20710    | <i>Kabuli</i>    | <i>Ca_Kabuli_denovo</i>      | 13515765                       | (T/C)       |
| 20711       | CakSNP20711    | <i>Kabuli</i>    | <i>Ca_Kabuli_denovo</i>      | 13528252                       | (G/A)       |
| 20712       | CakSNP20712    | <i>Kabuli</i>    | <i>Ca_Kabuli_denovo</i>      | 13528261                       | (G/A)       |
| 20713       | CakSNP20713    | <i>Kabuli</i>    | <i>Ca_Kabuli_denovo</i>      | 13536814                       | (A/G)       |
| 20714       | CakSNP20714    | <i>Kabuli</i>    | <i>Ca_Kabuli_denovo</i>      | 13536909                       | (C/T)       |
| 20715       | CakSNP20715    | <i>Kabuli</i>    | <i>Ca_Kabuli_denovo</i>      | 13536915                       | (G/C)       |
| 20716       | CakSNP20716    | <i>Kabuli</i>    | <i>Ca_Kabuli_denovo</i>      | 13539057                       | (G/C)       |
| 20717       | CakSNP20717    | <i>Kabuli</i>    | <i>Ca_Kabuli_denovo</i>      | 13544201                       | (G/A)       |
| 20718       | CakSNP20718    | <i>Kabuli</i>    | <i>Ca_Kabuli_denovo</i>      | 13550350                       | (T/C)       |
| 20719       | CakSNP20719    | <i>Kabuli</i>    | <i>Ca_Kabuli_denovo</i>      | 13560452                       | (G/A)       |
| 20720       | CakSNP20720    | <i>Kabuli</i>    | <i>Ca_Kabuli_denovo</i>      | 13565367                       | (C/G)       |
| 20721       | CakSNP20721    | <i>Kabuli</i>    | <i>Ca_Kabuli_denovo</i>      | 13565390                       | (A/G)       |
| 20722       | CakSNP20722    | <i>Kabuli</i>    | <i>Ca_Kabuli_denovo</i>      | 13575988                       | (T/C)       |
| 20723       | CakSNP20723    | <i>Kabuli</i>    | <i>Ca_Kabuli_denovo</i>      | 13576027                       | (G/T)       |
| 20724       | CakSNP20724    | <i>Kabuli</i>    | <i>Ca_Kabuli_denovo</i>      | 13602770                       | (G/T)       |
| 20725       | CakSNP20725    | <i>Kabuli</i>    | <i>Ca_Kabuli_denovo</i>      | 13604914                       | (T/C)       |
| 20726       | CakSNP20726    | <i>Kabuli</i>    | <i>Ca_Kabuli_denovo</i>      | 13604935                       | (C/T)       |
| 20727       | CakSNP20727    | <i>Kabuli</i>    | <i>Ca_Kabuli_denovo</i>      | 13606541                       | (A/G)       |
| 20728       | CakSNP20728    | <i>Kabuli</i>    | <i>Ca_Kabuli_denovo</i>      | 13613180                       | (T/C)       |
| 20729       | CakSNP20729    | <i>Kabuli</i>    | <i>Ca_Kabuli_denovo</i>      | 13613224                       | (A/G)       |
| 20730       | CakSNP20730    | <i>Kabuli</i>    | <i>Ca_Kabuli_denovo</i>      | 13613225                       | (A/G)       |
| 20731       | CakSNP20731    | <i>Kabuli</i>    | <i>Ca_Kabuli_denovo</i>      | 13613231                       | (C/G)       |
| 20732       | CakSNP20732    | <i>Kabuli</i>    | <i>Ca_Kabuli_denovo</i>      | 13617653                       | (C/T)       |
| 20733       | CakSNP20733    | <i>Kabuli</i>    | <i>Ca_Kabuli_denovo</i>      | 13617683                       | (A/T)       |
| 20734       | CakSNP20734    | <i>Kabuli</i>    | <i>Ca_Kabuli_denovo</i>      | 13623029                       | (G/A)       |
| 20735       | CakSNP20735    | <i>Kabuli</i>    | <i>Ca_Kabuli_denovo</i>      | 13623080                       | (G/C)       |
| 20736       | CakSNP20736    | <i>Kabuli</i>    | <i>Ca_Kabuli_denovo</i>      | 13625592                       | (C/G)       |
| 20737       | CakSNP20737    | <i>Kabuli</i>    | <i>Ca_Kabuli_denovo</i>      | 13625871                       | (G/T)       |
| 20738       | CakSNP20738    | <i>Kabuli</i>    | <i>Ca_Kabuli_denovo</i>      | 13626117                       | (C/T)       |
| 20739       | CakSNP20739    | <i>Kabuli</i>    | <i>Ca_Kabuli_denovo</i>      | 13629263                       | (T/C)       |
| 20740       | CakSNP20740    | <i>Kabuli</i>    | <i>Ca_Kabuli_denovo</i>      | 13629308                       | (C/T)       |
| 20741       | CakSNP20741    | <i>Kabuli</i>    | <i>Ca_Kabuli_denovo</i>      | 13632321                       | (T/C)       |
| 20742       | CakSNP20742    | <i>Kabuli</i>    | <i>Ca_Kabuli_denovo</i>      | 13632391                       | (A/G)       |
| 20743       | CakSNP20743    | <i>Kabuli</i>    | <i>Ca_Kabuli_denovo</i>      | 13641188                       | (A/G)       |
| 20744       | CakSNP20744    | <i>Kabuli</i>    | <i>Ca_Kabuli_denovo</i>      | 13641203                       | (G/A)       |
| 20745       | CakSNP20745    | <i>Kabuli</i>    | <i>Ca_Kabuli_denovo</i>      | 13641400                       | (G/A)       |
| 20746       | CakSNP20746    | <i>Kabuli</i>    | <i>Ca_Kabuli_denovo</i>      | 13643385                       | (G/C)       |

| <b>S.N.</b> | <b>SNP IDs</b> | <b>Cultivars</b> | <b>Chromosomes/scaffolds</b> | <b>Physical positions (bp)</b> | <b>SNPs</b> |
|-------------|----------------|------------------|------------------------------|--------------------------------|-------------|
| 20747       | CakSNP20747    | <i>Kabuli</i>    | <i>Ca_Kabuli_denovo</i>      | 13643444                       | (A/G)       |
| 20748       | CakSNP20748    | <i>Kabuli</i>    | <i>Ca_Kabuli_denovo</i>      | 13651337                       | (T/G)       |
| 20749       | CakSNP20749    | <i>Kabuli</i>    | <i>Ca_Kabuli_denovo</i>      | 13655503                       | (A/G)       |
| 20750       | CakSNP20750    | <i>Kabuli</i>    | <i>Ca_Kabuli_denovo</i>      | 13655518                       | (A/G)       |
| 20751       | CakSNP20751    | <i>Kabuli</i>    | <i>Ca_Kabuli_denovo</i>      | 13666470                       | (C/T)       |
| 20752       | CakSNP20752    | <i>Kabuli</i>    | <i>Ca_Kabuli_denovo</i>      | 13666480                       | (A/G)       |
| 20753       | CakSNP20753    | <i>Kabuli</i>    | <i>Ca_Kabuli_denovo</i>      | 13673377                       | (T/C)       |
| 20754       | CakSNP20754    | <i>Kabuli</i>    | <i>Ca_Kabuli_denovo</i>      | 13675125                       | (C/T)       |
| 20755       | CakSNP20755    | <i>Kabuli</i>    | <i>Ca_Kabuli_denovo</i>      | 13675292                       | (G/A)       |
| 20756       | CakSNP20756    | <i>Kabuli</i>    | <i>Ca_Kabuli_denovo</i>      | 13677592                       | (A/C)       |
| 20757       | CakSNP20757    | <i>Kabuli</i>    | <i>Ca_Kabuli_denovo</i>      | 13687869                       | (G/C)       |
| 20758       | CakSNP20758    | <i>Kabuli</i>    | <i>Ca_Kabuli_denovo</i>      | 13691846                       | (G/A)       |
| 20759       | CakSNP20759    | <i>Kabuli</i>    | <i>Ca_Kabuli_denovo</i>      | 13691919                       | (T/A)       |
| 20760       | CakSNP20760    | <i>Kabuli</i>    | <i>Ca_Kabuli_denovo</i>      | 13698536                       | (C/T)       |
| 20761       | CakSNP20761    | <i>Kabuli</i>    | <i>Ca_Kabuli_denovo</i>      | 13698551                       | (G/C)       |
| 20762       | CakSNP20762    | <i>Kabuli</i>    | <i>Ca_Kabuli_denovo</i>      | 13701338                       | (G/C)       |
| 20763       | CakSNP20763    | <i>Kabuli</i>    | <i>Ca_Kabuli_denovo</i>      | 13701377                       | (C/T)       |
| 20764       | CakSNP20764    | <i>Kabuli</i>    | <i>Ca_Kabuli_denovo</i>      | 13704680                       | (T/C)       |
| 20765       | CakSNP20765    | <i>Kabuli</i>    | <i>Ca_Kabuli_denovo</i>      | 13706750                       | (T/C)       |
| 20766       | CakSNP20766    | <i>Kabuli</i>    | <i>Ca_Kabuli_denovo</i>      | 13706908                       | (T/C)       |
| 20767       | CakSNP20767    | <i>Kabuli</i>    | <i>Ca_Kabuli_denovo</i>      | 13706944                       | (C/T)       |
| 20768       | CakSNP20768    | <i>Kabuli</i>    | <i>Ca_Kabuli_denovo</i>      | 13709609                       | (A/G)       |
| 20769       | CakSNP20769    | <i>Kabuli</i>    | <i>Ca_Kabuli_denovo</i>      | 13710121                       | (G/T)       |
| 20770       | CakSNP20770    | <i>Kabuli</i>    | <i>Ca_Kabuli_denovo</i>      | 13711298                       | (T/C)       |
| 20771       | CakSNP20771    | <i>Kabuli</i>    | <i>Ca_Kabuli_denovo</i>      | 13711325                       | (C/G)       |
| 20772       | CakSNP20772    | <i>Kabuli</i>    | <i>Ca_Kabuli_denovo</i>      | 13718021                       | (G/A)       |
| 20773       | CakSNP20773    | <i>Kabuli</i>    | <i>Ca_Kabuli_denovo</i>      | 13721788                       | (T/C)       |
| 20774       | CakSNP20774    | <i>Kabuli</i>    | <i>Ca_Kabuli_denovo</i>      | 13721815                       | (C/T)       |
| 20775       | CakSNP20775    | <i>Kabuli</i>    | <i>Ca_Kabuli_denovo</i>      | 13732598                       | (C/T)       |
| 20776       | CakSNP20776    | <i>Kabuli</i>    | <i>Ca_Kabuli_denovo</i>      | 13732658                       | (C/T)       |
| 20777       | CakSNP20777    | <i>Kabuli</i>    | <i>Ca_Kabuli_denovo</i>      | 13736037                       | (G/A)       |
| 20778       | CakSNP20778    | <i>Kabuli</i>    | <i>Ca_Kabuli_denovo</i>      | 13736092                       | (C/G)       |
| 20779       | CakSNP20779    | <i>Kabuli</i>    | <i>Ca_Kabuli_denovo</i>      | 13739207                       | (A/G)       |
| 20780       | CakSNP20780    | <i>Kabuli</i>    | <i>Ca_Kabuli_denovo</i>      | 13739213                       | (C/T)       |
| 20781       | CakSNP20781    | <i>Kabuli</i>    | <i>Ca_Kabuli_denovo</i>      | 13740208                       | (A/G)       |
| 20782       | CakSNP20782    | <i>Kabuli</i>    | <i>Ca_Kabuli_denovo</i>      | 13745703                       | (T/C)       |
| 20783       | CakSNP20783    | <i>Kabuli</i>    | <i>Ca_Kabuli_denovo</i>      | 13745704                       | (T/C)       |
| 20784       | CakSNP20784    | <i>Kabuli</i>    | <i>Ca_Kabuli_denovo</i>      | 13757579                       | (G/T)       |
| 20785       | CakSNP20785    | <i>Kabuli</i>    | <i>Ca_Kabuli_denovo</i>      | 13762433                       | (G/A)       |

| <b>S.N.</b> | <b>SNP IDs</b> | <b>Cultivars</b> | <b>Chromosomes/scaffolds</b> | <b>Physical positions (bp)</b> | <b>SNPs</b> |
|-------------|----------------|------------------|------------------------------|--------------------------------|-------------|
| 20786       | CakSNP20786    | <i>Kabuli</i>    | <i>Ca_Kabuli_denovo</i>      | 13762450                       | (C/T)       |
| 20787       | CakSNP20787    | <i>Kabuli</i>    | <i>Ca_Kabuli_denovo</i>      | 13764490                       | (C/A)       |
| 20788       | CakSNP20788    | <i>Kabuli</i>    | <i>Ca_Kabuli_denovo</i>      | 13770447                       | (C/T)       |
| 20789       | CakSNP20789    | <i>Kabuli</i>    | <i>Ca_Kabuli_denovo</i>      | 13770484                       | (T/C)       |
| 20790       | CakSNP20790    | <i>Kabuli</i>    | <i>Ca_Kabuli_denovo</i>      | 13788645                       | (T/G)       |
| 20791       | CakSNP20791    | <i>Kabuli</i>    | <i>Ca_Kabuli_denovo</i>      | 13788697                       | (G/A)       |
| 20792       | CakSNP20792    | <i>Kabuli</i>    | <i>Ca_Kabuli_denovo</i>      | 13788721                       | (T/C)       |
| 20793       | CakSNP20793    | <i>Kabuli</i>    | <i>Ca_Kabuli_denovo</i>      | 13794543                       | (T/C)       |
| 20794       | CakSNP20794    | <i>Kabuli</i>    | <i>Ca_Kabuli_denovo</i>      | 13799629                       | (G/C)       |
| 20795       | CakSNP20795    | <i>Kabuli</i>    | <i>Ca_Kabuli_denovo</i>      | 13799704                       | (T/C)       |
| 20796       | CakSNP20796    | <i>Kabuli</i>    | <i>Ca_Kabuli_denovo</i>      | 13817434                       | (G/A)       |
| 20797       | CakSNP20797    | <i>Kabuli</i>    | <i>Ca_Kabuli_denovo</i>      | 13819277                       | (C/A)       |
| 20798       | CakSNP20798    | <i>Kabuli</i>    | <i>Ca_Kabuli_denovo</i>      | 13819286                       | (G/C)       |
| 20799       | CakSNP20799    | <i>Kabuli</i>    | <i>Ca_Kabuli_denovo</i>      | 13820035                       | (C/T)       |
| 20800       | CakSNP20800    | <i>Kabuli</i>    | <i>Ca_Kabuli_denovo</i>      | 13826976                       | (G/T)       |
| 20801       | CakSNP20801    | <i>Kabuli</i>    | <i>Ca_Kabuli_denovo</i>      | 13826995                       | (G/A)       |
| 20802       | CakSNP20802    | <i>Kabuli</i>    | <i>Ca_Kabuli_denovo</i>      | 13831242                       | (A/T)       |
| 20803       | CakSNP20803    | <i>Kabuli</i>    | <i>Ca_Kabuli_denovo</i>      | 13838447                       | (T/C)       |
| 20804       | CakSNP20804    | <i>Kabuli</i>    | <i>Ca_Kabuli_denovo</i>      | 13841687                       | (C/T)       |
| 20805       | CakSNP20805    | <i>Kabuli</i>    | <i>Ca_Kabuli_denovo</i>      | 13841700                       | (A/G)       |
| 20806       | CakSNP20806    | <i>Kabuli</i>    | <i>Ca_Kabuli_denovo</i>      | 13841822                       | (T/G)       |
| 20807       | CakSNP20807    | <i>Kabuli</i>    | <i>Ca_Kabuli_denovo</i>      | 13849092                       | (C/T)       |
| 20808       | CakSNP20808    | <i>Kabuli</i>    | <i>Ca_Kabuli_denovo</i>      | 13851470                       | (A/G)       |
| 20809       | CakSNP20809    | <i>Kabuli</i>    | <i>Ca_Kabuli_denovo</i>      | 13854412                       | (G/C)       |
| 20810       | CakSNP20810    | <i>Kabuli</i>    | <i>Ca_Kabuli_denovo</i>      | 13868476                       | (A/C)       |
| 20811       | CakSNP20811    | <i>Kabuli</i>    | <i>Ca_Kabuli_denovo</i>      | 13868494                       | (C/G)       |
| 20812       | CakSNP20812    | <i>Kabuli</i>    | <i>Ca_Kabuli_denovo</i>      | 13868588                       | (G/A)       |
| 20813       | CakSNP20813    | <i>Kabuli</i>    | <i>Ca_Kabuli_denovo</i>      | 13870026                       | (T/C)       |
| 20814       | CakSNP20814    | <i>Kabuli</i>    | <i>Ca_Kabuli_denovo</i>      | 13870068                       | (A/C)       |
| 20815       | CakSNP20815    | <i>Kabuli</i>    | <i>Ca_Kabuli_denovo</i>      | 13878412                       | (A/C)       |
| 20816       | CakSNP20816    | <i>Kabuli</i>    | <i>Ca_Kabuli_denovo</i>      | 13879822                       | (G/T)       |
| 20817       | CakSNP20817    | <i>Kabuli</i>    | <i>Ca_Kabuli_denovo</i>      | 13882414                       | (G/A)       |
| 20818       | CakSNP20818    | <i>Kabuli</i>    | <i>Ca_Kabuli_denovo</i>      | 13882450                       | (T/C)       |
| 20819       | CakSNP20819    | <i>Kabuli</i>    | <i>Ca_Kabuli_denovo</i>      | 13884785                       | (T/C)       |
| 20820       | CakSNP20820    | <i>Kabuli</i>    | <i>Ca_Kabuli_denovo</i>      | 13885854                       | (T/C)       |
| 20821       | CakSNP20821    | <i>Kabuli</i>    | <i>Ca_Kabuli_denovo</i>      | 13892083                       | (A/G)       |
| 20822       | CakSNP20822    | <i>Kabuli</i>    | <i>Ca_Kabuli_denovo</i>      | 13892084                       | (C/A)       |
| 20823       | CakSNP20823    | <i>Kabuli</i>    | <i>Ca_Kabuli_denovo</i>      | 13898027                       | (G/A)       |
| 20824       | CakSNP20824    | <i>Kabuli</i>    | <i>Ca_Kabuli_denovo</i>      | 13901395                       | (T/C)       |

| <b>S.N.</b> | <b>SNP IDs</b> | <b>Cultivars</b> | <b>Chromosomes/scaffolds</b> | <b>Physical positions (bp)</b> | <b>SNPs</b> |
|-------------|----------------|------------------|------------------------------|--------------------------------|-------------|
| 20825       | CakSNP20825    | <i>Kabuli</i>    | <i>Ca_Kabuli_denovo</i>      | 13902570                       | (A/C)       |
| 20826       | CakSNP20826    | <i>Kabuli</i>    | <i>Ca_Kabuli_denovo</i>      | 13902571                       | (A/G)       |
| 20827       | CakSNP20827    | <i>Kabuli</i>    | <i>Ca_Kabuli_denovo</i>      | 13911052                       | (T/A)       |
| 20828       | CakSNP20828    | <i>Kabuli</i>    | <i>Ca_Kabuli_denovo</i>      | 13911082                       | (G/A)       |
| 20829       | CakSNP20829    | <i>Kabuli</i>    | <i>Ca_Kabuli_denovo</i>      | 13912343                       | (T/C)       |
| 20830       | CakSNP20830    | <i>Kabuli</i>    | <i>Ca_Kabuli_denovo</i>      | 13912361                       | (A/G)       |
| 20831       | CakSNP20831    | <i>Kabuli</i>    | <i>Ca_Kabuli_denovo</i>      | 13915445                       | (G/A)       |
| 20832       | CakSNP20832    | <i>Kabuli</i>    | <i>Ca_Kabuli_denovo</i>      | 13928830                       | (C/T)       |
| 20833       | CakSNP20833    | <i>Kabuli</i>    | <i>Ca_Kabuli_denovo</i>      | 13935332                       | (G/A)       |
| 20834       | CakSNP20834    | <i>Kabuli</i>    | <i>Ca_Kabuli_denovo</i>      | 13938219                       | (G/A)       |
| 20835       | CakSNP20835    | <i>Kabuli</i>    | <i>Ca_Kabuli_denovo</i>      | 13938220                       | (G/A)       |
| 20836       | CakSNP20836    | <i>Kabuli</i>    | <i>Ca_Kabuli_denovo</i>      | 13942437                       | (G/A)       |
| 20837       | CakSNP20837    | <i>Kabuli</i>    | <i>Ca_Kabuli_denovo</i>      | 13942467                       | (G/A)       |
| 20838       | CakSNP20838    | <i>Kabuli</i>    | <i>Ca_Kabuli_denovo</i>      | 13945517                       | (C/T)       |
| 20839       | CakSNP20839    | <i>Kabuli</i>    | <i>Ca_Kabuli_denovo</i>      | 13948830                       | (T/C)       |
| 20840       | CakSNP20840    | <i>Kabuli</i>    | <i>Ca_Kabuli_denovo</i>      | 13955773                       | (T/C)       |
| 20841       | CakSNP20841    | <i>Kabuli</i>    | <i>Ca_Kabuli_denovo</i>      | 13955776                       | (G/C)       |
| 20842       | CakSNP20842    | <i>Kabuli</i>    | <i>Ca_Kabuli_denovo</i>      | 13958314                       | (A/T)       |
| 20843       | CakSNP20843    | <i>Kabuli</i>    | <i>Ca_Kabuli_denovo</i>      | 13960720                       | (C/T)       |
| 20844       | CakSNP20844    | <i>Kabuli</i>    | <i>Ca_Kabuli_denovo</i>      | 13963694                       | (C/A)       |
| 20845       | CakSNP20845    | <i>Kabuli</i>    | <i>Ca_Kabuli_denovo</i>      | 13963760                       | (A/G)       |
| 20846       | CakSNP20846    | <i>Kabuli</i>    | <i>Ca_Kabuli_denovo</i>      | 13965291                       | (C/G)       |
| 20847       | CakSNP20847    | <i>Kabuli</i>    | <i>Ca_Kabuli_denovo</i>      | 13965316                       | (C/T)       |
| 20848       | CakSNP20848    | <i>Kabuli</i>    | <i>Ca_Kabuli_denovo</i>      | 13974263                       | (G/A)       |
| 20849       | CakSNP20849    | <i>Kabuli</i>    | <i>Ca_Kabuli_denovo</i>      | 13977184                       | (G/A)       |
| 20850       | CakSNP20850    | <i>Kabuli</i>    | <i>Ca_Kabuli_denovo</i>      | 13978845                       | (A/G)       |
| 20851       | CakSNP20851    | <i>Kabuli</i>    | <i>Ca_Kabuli_denovo</i>      | 13978865                       | (A/G)       |
| 20852       | CakSNP20852    | <i>Kabuli</i>    | <i>Ca_Kabuli_denovo</i>      | 13978866                       | (C/G)       |
| 20853       | CakSNP20853    | <i>Kabuli</i>    | <i>Ca_Kabuli_denovo</i>      | 13980992                       | (G/A)       |
| 20854       | CakSNP20854    | <i>Kabuli</i>    | <i>Ca_Kabuli_denovo</i>      | 13981007                       | (T/C)       |
| 20855       | CakSNP20855    | <i>Kabuli</i>    | <i>Ca_Kabuli_denovo</i>      | 13988791                       | (G/C)       |
| 20856       | CakSNP20856    | <i>Kabuli</i>    | <i>Ca_Kabuli_denovo</i>      | 13988810                       | (C/G)       |
| 20857       | CakSNP20857    | <i>Kabuli</i>    | <i>Ca_Kabuli_denovo</i>      | 13989848                       | (A/G)       |
| 20858       | CakSNP20858    | <i>Kabuli</i>    | <i>Ca_Kabuli_denovo</i>      | 13989891                       | (G/A)       |
| 20859       | CakSNP20859    | <i>Kabuli</i>    | <i>Ca_Kabuli_denovo</i>      | 13991399                       | (T/C)       |
| 20860       | CakSNP20860    | <i>Kabuli</i>    | <i>Ca_Kabuli_denovo</i>      | 13991444                       | (A/G)       |
| 20861       | CakSNP20861    | <i>Kabuli</i>    | <i>Ca_Kabuli_denovo</i>      | 13991699                       | (A/G)       |
| 20862       | CakSNP20862    | <i>Kabuli</i>    | <i>Ca_Kabuli_denovo</i>      | 13993112                       | (G/A)       |
| 20863       | CakSNP20863    | <i>Kabuli</i>    | <i>Ca_Kabuli_denovo</i>      | 13994280                       | (C/T)       |



| <b>S.N.</b> | <b>SNP IDs</b> | <b>Cultivars</b> | <b>Chromosomes/scaffolds</b> | <b>Physical positions (bp)</b> | <b>SNPs</b> |
|-------------|----------------|------------------|------------------------------|--------------------------------|-------------|
| 20864       | CakSNP20864    | <i>Kabuli</i>    | <i>Ca_Kabuli_denovo</i>      | 13994560                       | (C/G)       |
| 20865       | CakSNP20865    | <i>Kabuli</i>    | <i>Ca_Kabuli_denovo</i>      | 13994609                       | (A/G)       |
| 20866       | CakSNP20866    | <i>Kabuli</i>    | <i>Ca_Kabuli_denovo</i>      | 13997710                       | (C/A)       |
| 20867       | CakSNP20867    | <i>Kabuli</i>    | <i>Ca_Kabuli_denovo</i>      | 14013165                       | (T/C)       |
| 20868       | CakSNP20868    | <i>Kabuli</i>    | <i>Ca_Kabuli_denovo</i>      | 14024171                       | (A/G)       |
| 20869       | CakSNP20869    | <i>Kabuli</i>    | <i>Ca_Kabuli_denovo</i>      | 14024173                       | (T/C)       |
| 20870       | CakSNP20870    | <i>Kabuli</i>    | <i>Ca_Kabuli_denovo</i>      | 14031255                       | (G/C)       |
| 20871       | CakSNP20871    | <i>Kabuli</i>    | <i>Ca_Kabuli_denovo</i>      | 14031282                       | (A/G)       |
| 20872       | CakSNP20872    | <i>Kabuli</i>    | <i>Ca_Kabuli_denovo</i>      | 14038882                       | (A/G)       |
| 20873       | CakSNP20873    | <i>Kabuli</i>    | <i>Ca_Kabuli_denovo</i>      | 14047682                       | (A/G)       |
| 20874       | CakSNP20874    | <i>Kabuli</i>    | <i>Ca_Kabuli_denovo</i>      | 14047694                       | (G/A)       |
| 20875       | CakSNP20875    | <i>Kabuli</i>    | <i>Ca_Kabuli_denovo</i>      | 14051292                       | (C/A)       |
| 20876       | CakSNP20876    | <i>Kabuli</i>    | <i>Ca_Kabuli_denovo</i>      | 14054007                       | (C/T)       |
| 20877       | CakSNP20877    | <i>Kabuli</i>    | <i>Ca_Kabuli_denovo</i>      | 14054913                       | (C/T)       |
| 20878       | CakSNP20878    | <i>Kabuli</i>    | <i>Ca_Kabuli_denovo</i>      | 14063953                       | (G/C)       |
| 20879       | CakSNP20879    | <i>Kabuli</i>    | <i>Ca_Kabuli_denovo</i>      | 14069422                       | (A/G)       |
| 20880       | CakSNP20880    | <i>Kabuli</i>    | <i>Ca_Kabuli_denovo</i>      | 14069482                       | (C/T)       |
| 20881       | CakSNP20881    | <i>Kabuli</i>    | <i>Ca_Kabuli_denovo</i>      | 14070071                       | (A/G)       |
| 20882       | CakSNP20882    | <i>Kabuli</i>    | <i>Ca_Kabuli_denovo</i>      | 14070080                       | (T/C)       |
| 20883       | CakSNP20883    | <i>Kabuli</i>    | <i>Ca_Kabuli_denovo</i>      | 14090644                       | (C/G)       |
| 20884       | CakSNP20884    | <i>Kabuli</i>    | <i>Ca_Kabuli_denovo</i>      | 14094627                       | (C/T)       |
| 20885       | CakSNP20885    | <i>Kabuli</i>    | <i>Ca_Kabuli_denovo</i>      | 14094666                       | (A/G)       |
| 20886       | CakSNP20886    | <i>Kabuli</i>    | <i>Ca_Kabuli_denovo</i>      | 14095149                       | (T/G)       |
| 20887       | CakSNP20887    | <i>Kabuli</i>    | <i>Ca_Kabuli_denovo</i>      | 14097307                       | (T/G)       |
| 20888       | CakSNP20888    | <i>Kabuli</i>    | <i>Ca_Kabuli_denovo</i>      | 14097992                       | (G/A)       |
| 20889       | CakSNP20889    | <i>Kabuli</i>    | <i>Ca_Kabuli_denovo</i>      | 14099100                       | (A/G)       |
| 20890       | CakSNP20890    | <i>Kabuli</i>    | <i>Ca_Kabuli_denovo</i>      | 14101707                       | (G/C)       |
| 20891       | CakSNP20891    | <i>Kabuli</i>    | <i>Ca_Kabuli_denovo</i>      | 14102440                       | (C/T)       |
| 20892       | CakSNP20892    | <i>Kabuli</i>    | <i>Ca_Kabuli_denovo</i>      | 14102489                       | (G/T)       |
| 20893       | CakSNP20893    | <i>Kabuli</i>    | <i>Ca_Kabuli_denovo</i>      | 14104688                       | (T/A)       |
| 20894       | CakSNP20894    | <i>Kabuli</i>    | <i>Ca_Kabuli_denovo</i>      | 14109844                       | (G/A)       |
| 20895       | CakSNP20895    | <i>Kabuli</i>    | <i>Ca_Kabuli_denovo</i>      | 14109866                       | (A/C)       |
| 20896       | CakSNP20896    | <i>Kabuli</i>    | <i>Ca_Kabuli_denovo</i>      | 14109868                       | (A/C)       |
| 20897       | CakSNP20897    | <i>Kabuli</i>    | <i>Ca_Kabuli_denovo</i>      | 14112239                       | (C/T)       |
| 20898       | CakSNP20898    | <i>Kabuli</i>    | <i>Ca_Kabuli_denovo</i>      | 14112675                       | (G/T)       |
| 20899       | CakSNP20899    | <i>Kabuli</i>    | <i>Ca_Kabuli_denovo</i>      | 14112693                       | (C/T)       |
| 20900       | CakSNP20900    | <i>Kabuli</i>    | <i>Ca_Kabuli_denovo</i>      | 14115751                       | (C/T)       |
| 20901       | CakSNP20901    | <i>Kabuli</i>    | <i>Ca_Kabuli_denovo</i>      | 14121780                       | (G/T)       |
| 20902       | CakSNP20902    | <i>Kabuli</i>    | <i>Ca_Kabuli_denovo</i>      | 14121828                       | (C/T)       |

| <b>S.N.</b> | <b>SNP IDs</b> | <b>Cultivars</b> | <b>Chromosomes/scaffolds</b> | <b>Physical positions (bp)</b> | <b>SNPs</b> |
|-------------|----------------|------------------|------------------------------|--------------------------------|-------------|
| 20903       | CakSNP20903    | <i>Kabuli</i>    | <i>Ca_Kabuli_denovo</i>      | 14123266                       | (C/T)       |
| 20904       | CakSNP20904    | <i>Kabuli</i>    | <i>Ca_Kabuli_denovo</i>      | 14132147                       | (C/G)       |
| 20905       | CakSNP20905    | <i>Kabuli</i>    | <i>Ca_Kabuli_denovo</i>      | 14134459                       | (C/T)       |
| 20906       | CakSNP20906    | <i>Kabuli</i>    | <i>Ca_Kabuli_denovo</i>      | 14136009                       | (A/G)       |
| 20907       | CakSNP20907    | <i>Kabuli</i>    | <i>Ca_Kabuli_denovo</i>      | 14136078                       | (A/G)       |
| 20908       | CakSNP20908    | <i>Kabuli</i>    | <i>Ca_Kabuli_denovo</i>      | 14141764                       | (T/C)       |
| 20909       | CakSNP20909    | <i>Kabuli</i>    | <i>Ca_Kabuli_denovo</i>      | 14146205                       | (T/C)       |
| 20910       | CakSNP20910    | <i>Kabuli</i>    | <i>Ca_Kabuli_denovo</i>      | 14146512                       | (A/T)       |
| 20911       | CakSNP20911    | <i>Kabuli</i>    | <i>Ca_Kabuli_denovo</i>      | 14146533                       | (C/T)       |
| 20912       | CakSNP20912    | <i>Kabuli</i>    | <i>Ca_Kabuli_denovo</i>      | 14151634                       | (A/G)       |
| 20913       | CakSNP20913    | <i>Kabuli</i>    | <i>Ca_Kabuli_denovo</i>      | 14162150                       | (G/C)       |
| 20914       | CakSNP20914    | <i>Kabuli</i>    | <i>Ca_Kabuli_denovo</i>      | 14162186                       | (G/A)       |
| 20915       | CakSNP20915    | <i>Kabuli</i>    | <i>Ca_Kabuli_denovo</i>      | 14162459                       | (C/T)       |
| 20916       | CakSNP20916    | <i>Kabuli</i>    | <i>Ca_Kabuli_denovo</i>      | 14165612                       | (A/G)       |
| 20917       | CakSNP20917    | <i>Kabuli</i>    | <i>Ca_Kabuli_denovo</i>      | 14170796                       | (C/T)       |
| 20918       | CakSNP20918    | <i>Kabuli</i>    | <i>Ca_Kabuli_denovo</i>      | 14170853                       | (G/A)       |
| 20919       | CakSNP20919    | <i>Kabuli</i>    | <i>Ca_Kabuli_denovo</i>      | 14173237                       | (C/T)       |
| 20920       | CakSNP20920    | <i>Kabuli</i>    | <i>Ca_Kabuli_denovo</i>      | 14175735                       | (C/G)       |
| 20921       | CakSNP20921    | <i>Kabuli</i>    | <i>Ca_Kabuli_denovo</i>      | 14178519                       | (A/C)       |
| 20922       | CakSNP20922    | <i>Kabuli</i>    | <i>Ca_Kabuli_denovo</i>      | 14178529                       | (C/T)       |
| 20923       | CakSNP20923    | <i>Kabuli</i>    | <i>Ca_Kabuli_denovo</i>      | 14180447                       | (A/G)       |
| 20924       | CakSNP20924    | <i>Kabuli</i>    | <i>Ca_Kabuli_denovo</i>      | 14186276                       | (T/C)       |
| 20925       | CakSNP20925    | <i>Kabuli</i>    | <i>Ca_Kabuli_denovo</i>      | 14188666                       | (T/C)       |
| 20926       | CakSNP20926    | <i>Kabuli</i>    | <i>Ca_Kabuli_denovo</i>      | 14204954                       | (T/C)       |
| 20927       | CakSNP20927    | <i>Kabuli</i>    | <i>Ca_Kabuli_denovo</i>      | 14204970                       | (A/G)       |
| 20928       | CakSNP20928    | <i>Kabuli</i>    | <i>Ca_Kabuli_denovo</i>      | 14210876                       | (A/G)       |
| 20929       | CakSNP20929    | <i>Kabuli</i>    | <i>Ca_Kabuli_denovo</i>      | 14210938                       | (C/T)       |
| 20930       | CakSNP20930    | <i>Kabuli</i>    | <i>Ca_Kabuli_denovo</i>      | 14219449                       | (A/G)       |
| 20931       | CakSNP20931    | <i>Kabuli</i>    | <i>Ca_Kabuli_denovo</i>      | 14219489                       | (G/A)       |
| 20932       | CakSNP20932    | <i>Kabuli</i>    | <i>Ca_Kabuli_denovo</i>      | 14219623                       | (T/C)       |
| 20933       | CakSNP20933    | <i>Kabuli</i>    | <i>Ca_Kabuli_denovo</i>      | 14221319                       | (G/A)       |
| 20934       | CakSNP20934    | <i>Kabuli</i>    | <i>Ca_Kabuli_denovo</i>      | 14221501                       | (T/C)       |
| 20935       | CakSNP20935    | <i>Kabuli</i>    | <i>Ca_Kabuli_denovo</i>      | 14229007                       | (C/A)       |
| 20936       | CakSNP20936    | <i>Kabuli</i>    | <i>Ca_Kabuli_denovo</i>      | 14231935                       | (T/C)       |
| 20937       | CakSNP20937    | <i>Kabuli</i>    | <i>Ca_Kabuli_denovo</i>      | 14231950                       | (G/T)       |
| 20938       | CakSNP20938    | <i>Kabuli</i>    | <i>Ca_Kabuli_denovo</i>      | 14235265                       | (T/G)       |
| 20939       | CakSNP20939    | <i>Kabuli</i>    | <i>Ca_Kabuli_denovo</i>      | 14237166                       | (G/A)       |
| 20940       | CakSNP20940    | <i>Kabuli</i>    | <i>Ca_Kabuli_denovo</i>      | 14237557                       | (A/C)       |
| 20941       | CakSNP20941    | <i>Kabuli</i>    | <i>Ca_Kabuli_denovo</i>      | 14241384                       | (A/G)       |

| <b>S.N.</b> | <b>SNP IDs</b> | <b>Cultivars</b> | <b>Chromosomes/scaffolds</b> | <b>Physical positions (bp)</b> | <b>SNPs</b> |
|-------------|----------------|------------------|------------------------------|--------------------------------|-------------|
| 20942       | CakSNP20942    | <i>Kabuli</i>    | <i>Ca_Kabuli_denovo</i>      | 14244846                       | (A/G)       |
| 20943       | CakSNP20943    | <i>Kabuli</i>    | <i>Ca_Kabuli_denovo</i>      | 14246524                       | (T/G)       |
| 20944       | CakSNP20944    | <i>Kabuli</i>    | <i>Ca_Kabuli_denovo</i>      | 14251791                       | (G/C)       |
| 20945       | CakSNP20945    | <i>Kabuli</i>    | <i>Ca_Kabuli_denovo</i>      | 14251806                       | (A/G)       |
| 20946       | CakSNP20946    | <i>Kabuli</i>    | <i>Ca_Kabuli_denovo</i>      | 14255378                       | (G/A)       |
| 20947       | CakSNP20947    | <i>Kabuli</i>    | <i>Ca_Kabuli_denovo</i>      | 14257965                       | (C/A)       |
| 20948       | CakSNP20948    | <i>Kabuli</i>    | <i>Ca_Kabuli_denovo</i>      | 14264833                       | (G/C)       |
| 20949       | CakSNP20949    | <i>Kabuli</i>    | <i>Ca_Kabuli_denovo</i>      | 14264890                       | (T/C)       |
| 20950       | CakSNP20950    | <i>Kabuli</i>    | <i>Ca_Kabuli_denovo</i>      | 14265359                       | (A/G)       |
| 20951       | CakSNP20951    | <i>Kabuli</i>    | <i>Ca_Kabuli_denovo</i>      | 14275421                       | (G/T)       |
| 20952       | CakSNP20952    | <i>Kabuli</i>    | <i>Ca_Kabuli_denovo</i>      | 14276179                       | (C/T)       |
| 20953       | CakSNP20953    | <i>Kabuli</i>    | <i>Ca_Kabuli_denovo</i>      | 14276201                       | (G/A)       |
| 20954       | CakSNP20954    | <i>Kabuli</i>    | <i>Ca_Kabuli_denovo</i>      | 14282422                       | (T/G)       |
| 20955       | CakSNP20955    | <i>Kabuli</i>    | <i>Ca_Kabuli_denovo</i>      | 14282784                       | (G/A)       |
| 20956       | CakSNP20956    | <i>Kabuli</i>    | <i>Ca_Kabuli_denovo</i>      | 14282796                       | (G/A)       |
| 20957       | CakSNP20957    | <i>Kabuli</i>    | <i>Ca_Kabuli_denovo</i>      | 14286253                       | (T/C)       |
| 20958       | CakSNP20958    | <i>Kabuli</i>    | <i>Ca_Kabuli_denovo</i>      | 14286269                       | (T/C)       |
| 20959       | CakSNP20959    | <i>Kabuli</i>    | <i>Ca_Kabuli_denovo</i>      | 14289279                       | (C/G)       |
| 20960       | CakSNP20960    | <i>Kabuli</i>    | <i>Ca_Kabuli_denovo</i>      | 14289309                       | (A/G)       |
| 20961       | CakSNP20961    | <i>Kabuli</i>    | <i>Ca_Kabuli_denovo</i>      | 14292246                       | (C/G)       |
| 20962       | CakSNP20962    | <i>Kabuli</i>    | <i>Ca_Kabuli_denovo</i>      | 14296223                       | (C/T)       |
| 20963       | CakSNP20963    | <i>Kabuli</i>    | <i>Ca_Kabuli_denovo</i>      | 14297461                       | (G/C)       |
| 20964       | CakSNP20964    | <i>Kabuli</i>    | <i>Ca_Kabuli_denovo</i>      | 14297530                       | (G/C)       |
| 20965       | CakSNP20965    | <i>Kabuli</i>    | <i>Ca_Kabuli_denovo</i>      | 14303045                       | (C/T)       |
| 20966       | CakSNP20966    | <i>Kabuli</i>    | <i>Ca_Kabuli_denovo</i>      | 14307152                       | (A/G)       |
| 20967       | CakSNP20967    | <i>Kabuli</i>    | <i>Ca_Kabuli_denovo</i>      | 14308158                       | (C/G)       |
| 20968       | CakSNP20968    | <i>Kabuli</i>    | <i>Ca_Kabuli_denovo</i>      | 14308820                       | (C/T)       |
| 20969       | CakSNP20969    | <i>Kabuli</i>    | <i>Ca_Kabuli_denovo</i>      | 14310581                       | (A/C)       |
| 20970       | CakSNP20970    | <i>Kabuli</i>    | <i>Ca_Kabuli_denovo</i>      | 14310632                       | (T/C)       |
| 20971       | CakSNP20971    | <i>Kabuli</i>    | <i>Ca_Kabuli_denovo</i>      | 14311760                       | (A/G)       |
| 20972       | CakSNP20972    | <i>Kabuli</i>    | <i>Ca_Kabuli_denovo</i>      | 14313417                       | (C/G)       |
| 20973       | CakSNP20973    | <i>Kabuli</i>    | <i>Ca_Kabuli_denovo</i>      | 14320707                       | (G/A)       |
| 20974       | CakSNP20974    | <i>Kabuli</i>    | <i>Ca_Kabuli_denovo</i>      | 14320709                       | (T/A)       |
| 20975       | CakSNP20975    | <i>Kabuli</i>    | <i>Ca_Kabuli_denovo</i>      | 14328623                       | (A/C)       |
| 20976       | CakSNP20976    | <i>Kabuli</i>    | <i>Ca_Kabuli_denovo</i>      | 14328917                       | (G/T)       |
| 20977       | CakSNP20977    | <i>Kabuli</i>    | <i>Ca_Kabuli_denovo</i>      | 14333931                       | (A/G)       |
| 20978       | CakSNP20978    | <i>Kabuli</i>    | <i>Ca_Kabuli_denovo</i>      | 14337745                       | (A/G)       |
| 20979       | CakSNP20979    | <i>Kabuli</i>    | <i>Ca_Kabuli_denovo</i>      | 14337746                       | (T/C)       |
| 20980       | CakSNP20980    | <i>Kabuli</i>    | <i>Ca_Kabuli_denovo</i>      | 14341574                       | (A/G)       |

| <b>S.N.</b> | <b>SNP IDs</b> | <b>Cultivars</b> | <b>Chromosomes/scaffolds</b> | <b>Physical positions (bp)</b> | <b>SNPs</b> |
|-------------|----------------|------------------|------------------------------|--------------------------------|-------------|
| 20981       | CakSNP20981    | <i>Kabuli</i>    | <i>Ca_Kabuli_denovo</i>      | 14341617                       | (A/C)       |
| 20982       | CakSNP20982    | <i>Kabuli</i>    | <i>Ca_Kabuli_denovo</i>      | 14346701                       | (A/G)       |
| 20983       | CakSNP20983    | <i>Kabuli</i>    | <i>Ca_Kabuli_denovo</i>      | 14346747                       | (G/T)       |
| 20984       | CakSNP20984    | <i>Kabuli</i>    | <i>Ca_Kabuli_denovo</i>      | 14347271                       | (T/C)       |
| 20985       | CakSNP20985    | <i>Kabuli</i>    | <i>Ca_Kabuli_denovo</i>      | 14348435                       | (A/T)       |
| 20986       | CakSNP20986    | <i>Kabuli</i>    | <i>Ca_Kabuli_denovo</i>      | 14352328                       | (T/C)       |
| 20987       | CakSNP20987    | <i>Kabuli</i>    | <i>Ca_Kabuli_denovo</i>      | 14352669                       | (A/G)       |
| 20988       | CakSNP20988    | <i>Kabuli</i>    | <i>Ca_Kabuli_denovo</i>      | 14353348                       | (G/T)       |
| 20989       | CakSNP20989    | <i>Kabuli</i>    | <i>Ca_Kabuli_denovo</i>      | 14353366                       | (G/A)       |
| 20990       | CakSNP20990    | <i>Kabuli</i>    | <i>Ca_Kabuli_denovo</i>      | 14364703                       | (C/G)       |
| 20991       | CakSNP20991    | <i>Kabuli</i>    | <i>Ca_Kabuli_denovo</i>      | 14369102                       | (C/G)       |
| 20992       | CakSNP20992    | <i>Kabuli</i>    | <i>Ca_Kabuli_denovo</i>      | 14369921                       | (T/C)       |
| 20993       | CakSNP20993    | <i>Kabuli</i>    | <i>Ca_Kabuli_denovo</i>      | 14380810                       | (C/G)       |
| 20994       | CakSNP20994    | <i>Kabuli</i>    | <i>Ca_Kabuli_denovo</i>      | 14380823                       | (T/C)       |
| 20995       | CakSNP20995    | <i>Kabuli</i>    | <i>Ca_Kabuli_denovo</i>      | 14383046                       | (C/T)       |
| 20996       | CakSNP20996    | <i>Kabuli</i>    | <i>Ca_Kabuli_denovo</i>      | 14388649                       | (G/A)       |
| 20997       | CakSNP20997    | <i>Kabuli</i>    | <i>Ca_Kabuli_denovo</i>      | 14388663                       | (T/A)       |
| 20998       | CakSNP20998    | <i>Kabuli</i>    | <i>Ca_Kabuli_denovo</i>      | 14394158                       | (C/T)       |
| 20999       | CakSNP20999    | <i>Kabuli</i>    | <i>Ca_Kabuli_denovo</i>      | 14397942                       | (G/A)       |
| 21000       | CakSNP21000    | <i>Kabuli</i>    | <i>Ca_Kabuli_denovo</i>      | 14401170                       | (T/C)       |
| 21001       | CakSNP21001    | <i>Kabuli</i>    | <i>Ca_Kabuli_denovo</i>      | 14402239                       | (T/G)       |
| 21002       | CakSNP21002    | <i>Kabuli</i>    | <i>Ca_Kabuli_denovo</i>      | 14403229                       | (T/G)       |
| 21003       | CakSNP21003    | <i>Kabuli</i>    | <i>Ca_Kabuli_denovo</i>      | 14405364                       | (C/T)       |
| 21004       | CakSNP21004    | <i>Kabuli</i>    | <i>Ca_Kabuli_denovo</i>      | 14405406                       | (T/C)       |
| 21005       | CakSNP21005    | <i>Kabuli</i>    | <i>Ca_Kabuli_denovo</i>      | 14406925                       | (C/G)       |
| 21006       | CakSNP21006    | <i>Kabuli</i>    | <i>Ca_Kabuli_denovo</i>      | 14406958                       | (A/G)       |
| 21007       | CakSNP21007    | <i>Kabuli</i>    | <i>Ca_Kabuli_denovo</i>      | 14406974                       | (G/C)       |
| 21008       | CakSNP21008    | <i>Kabuli</i>    | <i>Ca_Kabuli_denovo</i>      | 14407215                       | (C/A)       |
| 21009       | CakSNP21009    | <i>Kabuli</i>    | <i>Ca_Kabuli_denovo</i>      | 14407218                       | (T/C)       |
| 21010       | CakSNP21010    | <i>Kabuli</i>    | <i>Ca_Kabuli_denovo</i>      | 14414831                       | (A/C)       |
| 21011       | CakSNP21011    | <i>Kabuli</i>    | <i>Ca_Kabuli_denovo</i>      | 14416795                       | (G/A)       |
| 21012       | CakSNP21012    | <i>Kabuli</i>    | <i>Ca_Kabuli_denovo</i>      | 14429719                       | (T/C)       |
| 21013       | CakSNP21013    | <i>Kabuli</i>    | <i>Ca_Kabuli_denovo</i>      | 14433591                       | (C/T)       |
| 21014       | CakSNP21014    | <i>Kabuli</i>    | <i>Ca_Kabuli_denovo</i>      | 14437122                       | (T/G)       |
| 21015       | CakSNP21015    | <i>Kabuli</i>    | <i>Ca_Kabuli_denovo</i>      | 14437433                       | (T/C)       |
| 21016       | CakSNP21016    | <i>Kabuli</i>    | <i>Ca_Kabuli_denovo</i>      | 14442419                       | (T/C)       |
| 21017       | CakSNP21017    | <i>Kabuli</i>    | <i>Ca_Kabuli_denovo</i>      | 14442430                       | (C/T)       |
| 21018       | CakSNP21018    | <i>Kabuli</i>    | <i>Ca_Kabuli_denovo</i>      | 14443760                       | (T/G)       |
| 21019       | CakSNP21019    | <i>Kabuli</i>    | <i>Ca_Kabuli_denovo</i>      | 14443778                       | (A/G)       |

| <b>S.N.</b> | <b>SNP IDs</b> | <b>Cultivars</b> | <b>Chromosomes/scaffolds</b> | <b>Physical positions (bp)</b> | <b>SNPs</b> |
|-------------|----------------|------------------|------------------------------|--------------------------------|-------------|
| 21020       | CakSNP21020    | <i>Kabuli</i>    | <i>Ca_Kabuli_denovo</i>      | 14444490                       | (T/C)       |
| 21021       | CakSNP21021    | <i>Kabuli</i>    | <i>Ca_Kabuli_denovo</i>      | 14444536                       | (C/G)       |
| 21022       | CakSNP21022    | <i>Kabuli</i>    | <i>Ca_Kabuli_denovo</i>      | 14445505                       | (A/C)       |
| 21023       | CakSNP21023    | <i>Kabuli</i>    | <i>Ca_Kabuli_denovo</i>      | 14448509                       | (T/G)       |
| 21024       | CakSNP21024    | <i>Kabuli</i>    | <i>Ca_Kabuli_denovo</i>      | 14449521                       | (A/T)       |
| 21025       | CakSNP21025    | <i>Kabuli</i>    | <i>Ca_Kabuli_denovo</i>      | 14449530                       | (G/A)       |
| 21026       | CakSNP21026    | <i>Kabuli</i>    | <i>Ca_Kabuli_denovo</i>      | 14452270                       | (T/C)       |
| 21027       | CakSNP21027    | <i>Kabuli</i>    | <i>Ca_Kabuli_denovo</i>      | 14457529                       | (C/T)       |
| 21028       | CakSNP21028    | <i>Kabuli</i>    | <i>Ca_Kabuli_denovo</i>      | 14467081                       | (T/G)       |
| 21029       | CakSNP21029    | <i>Kabuli</i>    | <i>Ca_Kabuli_denovo</i>      | 14469056                       | (T/C)       |
| 21030       | CakSNP21030    | <i>Kabuli</i>    | <i>Ca_Kabuli_denovo</i>      | 14469127                       | (C/G)       |
| 21031       | CakSNP21031    | <i>Kabuli</i>    | <i>Ca_Kabuli_denovo</i>      | 14469420                       | (A/G)       |
| 21032       | CakSNP21032    | <i>Kabuli</i>    | <i>Ca_Kabuli_denovo</i>      | 14483569                       | (C/T)       |
| 21033       | CakSNP21033    | <i>Kabuli</i>    | <i>Ca_Kabuli_denovo</i>      | 14495553                       | (A/G)       |
| 21034       | CakSNP21034    | <i>Kabuli</i>    | <i>Ca_Kabuli_denovo</i>      | 14495559                       | (T/G)       |
| 21035       | CakSNP21035    | <i>Kabuli</i>    | <i>Ca_Kabuli_denovo</i>      | 14513052                       | (T/C)       |
| 21036       | CakSNP21036    | <i>Kabuli</i>    | <i>Ca_Kabuli_denovo</i>      | 14513906                       | (G/T)       |
| 21037       | CakSNP21037    | <i>Kabuli</i>    | <i>Ca_Kabuli_denovo</i>      | 14514776                       | (T/A)       |
| 21038       | CakSNP21038    | <i>Kabuli</i>    | <i>Ca_Kabuli_denovo</i>      | 14514787                       | (T/C)       |
| 21039       | CakSNP21039    | <i>Kabuli</i>    | <i>Ca_Kabuli_denovo</i>      | 14515738                       | (G/C)       |
| 21040       | CakSNP21040    | <i>Kabuli</i>    | <i>Ca_Kabuli_denovo</i>      | 14530041                       | (A/C)       |
| 21041       | CakSNP21041    | <i>Kabuli</i>    | <i>Ca_Kabuli_denovo</i>      | 14537319                       | (T/C)       |
| 21042       | CakSNP21042    | <i>Kabuli</i>    | <i>Ca_Kabuli_denovo</i>      | 14543760                       | (C/T)       |
| 21043       | CakSNP21043    | <i>Kabuli</i>    | <i>Ca_Kabuli_denovo</i>      | 14546700                       | (A/G)       |
| 21044       | CakSNP21044    | <i>Kabuli</i>    | <i>Ca_Kabuli_denovo</i>      | 14547594                       | (C/T)       |
| 21045       | CakSNP21045    | <i>Kabuli</i>    | <i>Ca_Kabuli_denovo</i>      | 14550152                       | (G/A)       |
| 21046       | CakSNP21046    | <i>Kabuli</i>    | <i>Ca_Kabuli_denovo</i>      | 14551303                       | (G/T)       |
| 21047       | CakSNP21047    | <i>Kabuli</i>    | <i>Ca_Kabuli_denovo</i>      | 14561183                       | (A/G)       |
| 21048       | CakSNP21048    | <i>Kabuli</i>    | <i>Ca_Kabuli_denovo</i>      | 14562250                       | (C/T)       |
| 21049       | CakSNP21049    | <i>Kabuli</i>    | <i>Ca_Kabuli_denovo</i>      | 14566607                       | (A/G)       |
| 21050       | CakSNP21050    | <i>Kabuli</i>    | <i>Ca_Kabuli_denovo</i>      | 14570440                       | (C/G)       |
| 21051       | CakSNP21051    | <i>Kabuli</i>    | <i>Ca_Kabuli_denovo</i>      | 14570663                       | (G/T)       |
| 21052       | CakSNP21052    | <i>Kabuli</i>    | <i>Ca_Kabuli_denovo</i>      | 14571952                       | (T/A)       |
| 21053       | CakSNP21053    | <i>Kabuli</i>    | <i>Ca_Kabuli_denovo</i>      | 14572744                       | (T/C)       |
| 21054       | CakSNP21054    | <i>Kabuli</i>    | <i>Ca_Kabuli_denovo</i>      | 14573976                       | (C/T)       |
| 21055       | CakSNP21055    | <i>Kabuli</i>    | <i>Ca_Kabuli_denovo</i>      | 14578027                       | (A/C)       |
| 21056       | CakSNP21056    | <i>Kabuli</i>    | <i>Ca_Kabuli_denovo</i>      | 14578231                       | (A/G)       |
| 21057       | CakSNP21057    | <i>Kabuli</i>    | <i>Ca_Kabuli_denovo</i>      | 14578249                       | (C/T)       |
| 21058       | CakSNP21058    | <i>Kabuli</i>    | <i>Ca_Kabuli_denovo</i>      | 14578273                       | (G/A)       |

| <b>S.N.</b> | <b>SNP IDs</b> | <b>Cultivars</b> | <b>Chromosomes/scaffolds</b> | <b>Physical positions (bp)</b> | <b>SNPs</b> |
|-------------|----------------|------------------|------------------------------|--------------------------------|-------------|
| 21059       | CakSNP21059    | <i>Kabuli</i>    | <i>Ca_Kabuli_denovo</i>      | 14582337                       | (C/T)       |
| 21060       | CakSNP21060    | <i>Kabuli</i>    | <i>Ca_Kabuli_denovo</i>      | 14587510                       | (T/C)       |
| 21061       | CakSNP21061    | <i>Kabuli</i>    | <i>Ca_Kabuli_denovo</i>      | 14589670                       | (G/A)       |
| 21062       | CakSNP21062    | <i>Kabuli</i>    | <i>Ca_Kabuli_denovo</i>      | 14589693                       | (G/C)       |
| 21063       | CakSNP21063    | <i>Kabuli</i>    | <i>Ca_Kabuli_denovo</i>      | 14590243                       | (A/C)       |
| 21064       | CakSNP21064    | <i>Kabuli</i>    | <i>Ca_Kabuli_denovo</i>      | 14596822                       | (T/G)       |
| 21065       | CakSNP21065    | <i>Kabuli</i>    | <i>Ca_Kabuli_denovo</i>      | 14596886                       | (T/C)       |
| 21066       | CakSNP21066    | <i>Kabuli</i>    | <i>Ca_Kabuli_denovo</i>      | 14597698                       | (T/C)       |
| 21067       | CakSNP21067    | <i>Kabuli</i>    | <i>Ca_Kabuli_denovo</i>      | 14599704                       | (A/G)       |
| 21068       | CakSNP21068    | <i>Kabuli</i>    | <i>Ca_Kabuli_denovo</i>      | 14609759                       | (C/G)       |
| 21069       | CakSNP21069    | <i>Kabuli</i>    | <i>Ca_Kabuli_denovo</i>      | 14609792                       | (T/C)       |
| 21070       | CakSNP21070    | <i>Kabuli</i>    | <i>Ca_Kabuli_denovo</i>      | 14614842                       | (G/T)       |
| 21071       | CakSNP21071    | <i>Kabuli</i>    | <i>Ca_Kabuli_denovo</i>      | 14615031                       | (T/G)       |
| 21072       | CakSNP21072    | <i>Kabuli</i>    | <i>Ca_Kabuli_denovo</i>      | 14617523                       | (T/C)       |
| 21073       | CakSNP21073    | <i>Kabuli</i>    | <i>Ca_Kabuli_denovo</i>      | 14619462                       | (T/G)       |
| 21074       | CakSNP21074    | <i>Kabuli</i>    | <i>Ca_Kabuli_denovo</i>      | 14619490                       | (T/C)       |
| 21075       | CakSNP21075    | <i>Kabuli</i>    | <i>Ca_Kabuli_denovo</i>      | 14620013                       | (C/T)       |
| 21076       | CakSNP21076    | <i>Kabuli</i>    | <i>Ca_Kabuli_denovo</i>      | 14631563                       | (T/G)       |
| 21077       | CakSNP21077    | <i>Kabuli</i>    | <i>Ca_Kabuli_denovo</i>      | 14636201                       | (G/A)       |
| 21078       | CakSNP21078    | <i>Kabuli</i>    | <i>Ca_Kabuli_denovo</i>      | 14636204                       | (A/G)       |
| 21079       | CakSNP21079    | <i>Kabuli</i>    | <i>Ca_Kabuli_denovo</i>      | 14636266                       | (G/A)       |
| 21080       | CakSNP21080    | <i>Kabuli</i>    | <i>Ca_Kabuli_denovo</i>      | 14636270                       | (A/C)       |
| 21081       | CakSNP21081    | <i>Kabuli</i>    | <i>Ca_Kabuli_denovo</i>      | 14641177                       | (A/C)       |
| 21082       | CakSNP21082    | <i>Kabuli</i>    | <i>Ca_Kabuli_denovo</i>      | 14648080                       | (C/G)       |
| 21083       | CakSNP21083    | <i>Kabuli</i>    | <i>Ca_Kabuli_denovo</i>      | 14648723                       | (T/C)       |
| 21084       | CakSNP21084    | <i>Kabuli</i>    | <i>Ca_Kabuli_denovo</i>      | 14648727                       | (C/T)       |
| 21085       | CakSNP21085    | <i>Kabuli</i>    | <i>Ca_Kabuli_denovo</i>      | 14652198                       | (G/T)       |
| 21086       | CakSNP21086    | <i>Kabuli</i>    | <i>Ca_Kabuli_denovo</i>      | 14660915                       | (A/G)       |
| 21087       | CakSNP21087    | <i>Kabuli</i>    | <i>Ca_Kabuli_denovo</i>      | 14668713                       | (A/C)       |
| 21088       | CakSNP21088    | <i>Kabuli</i>    | <i>Ca_Kabuli_denovo</i>      | 14670691                       | (C/T)       |
| 21089       | CakSNP21089    | <i>Kabuli</i>    | <i>Ca_Kabuli_denovo</i>      | 14670709                       | (C/T)       |
| 21090       | CakSNP21090    | <i>Kabuli</i>    | <i>Ca_Kabuli_denovo</i>      | 14673778                       | (T/C)       |
| 21091       | CakSNP21091    | <i>Kabuli</i>    | <i>Ca_Kabuli_denovo</i>      | 14682478                       | (C/G)       |
| 21092       | CakSNP21092    | <i>Kabuli</i>    | <i>Ca_Kabuli_denovo</i>      | 14682505                       | (T/C)       |
| 21093       | CakSNP21093    | <i>Kabuli</i>    | <i>Ca_Kabuli_denovo</i>      | 14685915                       | (G/A)       |
| 21094       | CakSNP21094    | <i>Kabuli</i>    | <i>Ca_Kabuli_denovo</i>      | 14689649                       | (G/C)       |
| 21095       | CakSNP21095    | <i>Kabuli</i>    | <i>Ca_Kabuli_denovo</i>      | 14696938                       | (A/G)       |
| 21096       | CakSNP21096    | <i>Kabuli</i>    | <i>Ca_Kabuli_denovo</i>      | 14698942                       | (T/C)       |
| 21097       | CakSNP21097    | <i>Kabuli</i>    | <i>Ca_Kabuli_denovo</i>      | 14703530                       | (C/G)       |

| <b>S.N.</b> | <b>SNP IDs</b> | <b>Cultivars</b> | <b>Chromosomes/scaffolds</b> | <b>Physical positions (bp)</b> | <b>SNPs</b> |
|-------------|----------------|------------------|------------------------------|--------------------------------|-------------|
| 21098       | CakSNP21098    | <i>Kabuli</i>    | <i>Ca_Kabuli_denovo</i>      | 14703575                       | (A/G)       |
| 21099       | CakSNP21099    | <i>Kabuli</i>    | <i>Ca_Kabuli_denovo</i>      | 14704072                       | (T/C)       |
| 21100       | CakSNP21100    | <i>Kabuli</i>    | <i>Ca_Kabuli_denovo</i>      | 14704120                       | (T/C)       |
| 21101       | CakSNP21101    | <i>Kabuli</i>    | <i>Ca_Kabuli_denovo</i>      | 14704731                       | (C/T)       |
| 21102       | CakSNP21102    | <i>Kabuli</i>    | <i>Ca_Kabuli_denovo</i>      | 14704732                       | (T/C)       |
| 21103       | CakSNP21103    | <i>Kabuli</i>    | <i>Ca_Kabuli_denovo</i>      | 14715112                       | (A/G)       |
| 21104       | CakSNP21104    | <i>Kabuli</i>    | <i>Ca_Kabuli_denovo</i>      | 14715215                       | (G/A)       |
| 21105       | CakSNP21105    | <i>Kabuli</i>    | <i>Ca_Kabuli_denovo</i>      | 14715220                       | (C/G)       |
| 21106       | CakSNP21106    | <i>Kabuli</i>    | <i>Ca_Kabuli_denovo</i>      | 14726401                       | (A/G)       |
| 21107       | CakSNP21107    | <i>Kabuli</i>    | <i>Ca_Kabuli_denovo</i>      | 14728979                       | (G/T)       |
| 21108       | CakSNP21108    | <i>Kabuli</i>    | <i>Ca_Kabuli_denovo</i>      | 14729758                       | (C/G)       |
| 21109       | CakSNP21109    | <i>Kabuli</i>    | <i>Ca_Kabuli_denovo</i>      | 14729891                       | (A/T)       |
| 21110       | CakSNP21110    | <i>Kabuli</i>    | <i>Ca_Kabuli_denovo</i>      | 14735636                       | (T/G)       |
| 21111       | CakSNP21111    | <i>Kabuli</i>    | <i>Ca_Kabuli_denovo</i>      | 14736247                       | (A/G)       |
| 21112       | CakSNP21112    | <i>Kabuli</i>    | <i>Ca_Kabuli_denovo</i>      | 14736289                       | (C/T)       |
| 21113       | CakSNP21113    | <i>Kabuli</i>    | <i>Ca_Kabuli_denovo</i>      | 14741708                       | (A/C)       |
| 21114       | CakSNP21114    | <i>Kabuli</i>    | <i>Ca_Kabuli_denovo</i>      | 14743692                       | (C/G)       |
| 21115       | CakSNP21115    | <i>Kabuli</i>    | <i>Ca_Kabuli_denovo</i>      | 14743756                       | (T/A)       |
| 21116       | CakSNP21116    | <i>Kabuli</i>    | <i>Ca_Kabuli_denovo</i>      | 14745532                       | (A/C)       |
| 21117       | CakSNP21117    | <i>Kabuli</i>    | <i>Ca_Kabuli_denovo</i>      | 14746118                       | (A/G)       |
| 21118       | CakSNP21118    | <i>Kabuli</i>    | <i>Ca_Kabuli_denovo</i>      | 14746154                       | (A/G)       |
| 21119       | CakSNP21119    | <i>Kabuli</i>    | <i>Ca_Kabuli_denovo</i>      | 14748412                       | (G/A)       |
| 21120       | CakSNP21120    | <i>Kabuli</i>    | <i>Ca_Kabuli_denovo</i>      | 14748417                       | (G/C)       |
| 21121       | CakSNP21121    | <i>Kabuli</i>    | <i>Ca_Kabuli_denovo</i>      | 14749636                       | (G/A)       |
| 21122       | CakSNP21122    | <i>Kabuli</i>    | <i>Ca_Kabuli_denovo</i>      | 14749704                       | (T/G)       |
| 21123       | CakSNP21123    | <i>Kabuli</i>    | <i>Ca_Kabuli_denovo</i>      | 14749705                       | (G/T)       |
| 21124       | CakSNP21124    | <i>Kabuli</i>    | <i>Ca_Kabuli_denovo</i>      | 14752787                       | (T/C)       |
| 21125       | CakSNP21125    | <i>Kabuli</i>    | <i>Ca_Kabuli_denovo</i>      | 14755314                       | (C/T)       |
| 21126       | CakSNP21126    | <i>Kabuli</i>    | <i>Ca_Kabuli_denovo</i>      | 14757725                       | (C/G)       |
| 21127       | CakSNP21127    | <i>Kabuli</i>    | <i>Ca_Kabuli_denovo</i>      | 14759576                       | (C/T)       |
| 21128       | CakSNP21128    | <i>Kabuli</i>    | <i>Ca_Kabuli_denovo</i>      | 14782372                       | (C/T)       |
| 21129       | CakSNP21129    | <i>Kabuli</i>    | <i>Ca_Kabuli_denovo</i>      | 14782399                       | (C/T)       |
| 21130       | CakSNP21130    | <i>Kabuli</i>    | <i>Ca_Kabuli_denovo</i>      | 14787071                       | (G/T)       |
| 21131       | CakSNP21131    | <i>Kabuli</i>    | <i>Ca_Kabuli_denovo</i>      | 14788336                       | (T/C)       |
| 21132       | CakSNP21132    | <i>Kabuli</i>    | <i>Ca_Kabuli_denovo</i>      | 14792248                       | (G/C)       |
| 21133       | CakSNP21133    | <i>Kabuli</i>    | <i>Ca_Kabuli_denovo</i>      | 14792775                       | (G/A)       |
| 21134       | CakSNP21134    | <i>Kabuli</i>    | <i>Ca_Kabuli_denovo</i>      | 14801212                       | (C/G)       |
| 21135       | CakSNP21135    | <i>Kabuli</i>    | <i>Ca_Kabuli_denovo</i>      | 14801218                       | (C/T)       |
| 21136       | CakSNP21136    | <i>Kabuli</i>    | <i>Ca_Kabuli_denovo</i>      | 14805457                       | (T/C)       |

| <b>S.N.</b> | <b>SNP IDs</b> | <b>Cultivars</b> | <b>Chromosomes/scaffolds</b> | <b>Physical positions (bp)</b> | <b>SNPs</b> |
|-------------|----------------|------------------|------------------------------|--------------------------------|-------------|
| 21137       | CakSNP21137    | <i>Kabuli</i>    | <i>Ca_Kabuli_denovo</i>      | 14805477                       | (G/C)       |
| 21138       | CakSNP21138    | <i>Kabuli</i>    | <i>Ca_Kabuli_denovo</i>      | 14805855                       | (T/C)       |
| 21139       | CakSNP21139    | <i>Kabuli</i>    | <i>Ca_Kabuli_denovo</i>      | 14805865                       | (A/G)       |
| 21140       | CakSNP21140    | <i>Kabuli</i>    | <i>Ca_Kabuli_denovo</i>      | 14811884                       | (G/C)       |
| 21141       | CakSNP21141    | <i>Kabuli</i>    | <i>Ca_Kabuli_denovo</i>      | 14825428                       | (C/G)       |
| 21142       | CakSNP21142    | <i>Kabuli</i>    | <i>Ca_Kabuli_denovo</i>      | 14825440                       | (G/C)       |
| 21143       | CakSNP21143    | <i>Kabuli</i>    | <i>Ca_Kabuli_denovo</i>      | 14833055                       | (C/A)       |
| 21144       | CakSNP21144    | <i>Kabuli</i>    | <i>Ca_Kabuli_denovo</i>      | 14833103                       | (A/G)       |
| 21145       | CakSNP21145    | <i>Kabuli</i>    | <i>Ca_Kabuli_denovo</i>      | 14834045                       | (G/C)       |
| 21146       | CakSNP21146    | <i>Kabuli</i>    | <i>Ca_Kabuli_denovo</i>      | 14838314                       | (G/C)       |
| 21147       | CakSNP21147    | <i>Kabuli</i>    | <i>Ca_Kabuli_denovo</i>      | 14841355                       | (G/A)       |
| 21148       | CakSNP21148    | <i>Kabuli</i>    | <i>Ca_Kabuli_denovo</i>      | 14841976                       | (C/T)       |
| 21149       | CakSNP21149    | <i>Kabuli</i>    | <i>Ca_Kabuli_denovo</i>      | 14845633                       | (A/C)       |
| 21150       | CakSNP21150    | <i>Kabuli</i>    | <i>Ca_Kabuli_denovo</i>      | 14861241                       | (T/C)       |
| 21151       | CakSNP21151    | <i>Kabuli</i>    | <i>Ca_Kabuli_denovo</i>      | 14861255                       | (T/C)       |
| 21152       | CakSNP21152    | <i>Kabuli</i>    | <i>Ca_Kabuli_denovo</i>      | 14864054                       | (G/T)       |
| 21153       | CakSNP21153    | <i>Kabuli</i>    | <i>Ca_Kabuli_denovo</i>      | 14864425                       | (C/T)       |
| 21154       | CakSNP21154    | <i>Kabuli</i>    | <i>Ca_Kabuli_denovo</i>      | 14872625                       | (C/T)       |
| 21155       | CakSNP21155    | <i>Kabuli</i>    | <i>Ca_Kabuli_denovo</i>      | 14872631                       | (C/T)       |
| 21156       | CakSNP21156    | <i>Kabuli</i>    | <i>Ca_Kabuli_denovo</i>      | 14877101                       | (G/A)       |
| 21157       | CakSNP21157    | <i>Kabuli</i>    | <i>Ca_Kabuli_denovo</i>      | 14877962                       | (G/A)       |
| 21158       | CakSNP21158    | <i>Kabuli</i>    | <i>Ca_Kabuli_denovo</i>      | 14878041                       | (C/G)       |
| 21159       | CakSNP21159    | <i>Kabuli</i>    | <i>Ca_Kabuli_denovo</i>      | 14881946                       | (C/T)       |
| 21160       | CakSNP21160    | <i>Kabuli</i>    | <i>Ca_Kabuli_denovo</i>      | 14883255                       | (A/C)       |
| 21161       | CakSNP21161    | <i>Kabuli</i>    | <i>Ca_Kabuli_denovo</i>      | 14883746                       | (C/T)       |
| 21162       | CakSNP21162    | <i>Kabuli</i>    | <i>Ca_Kabuli_denovo</i>      | 14883748                       | (G/A)       |
| 21163       | CakSNP21163    | <i>Kabuli</i>    | <i>Ca_Kabuli_denovo</i>      | 14886823                       | (T/C)       |
| 21164       | CakSNP21164    | <i>Kabuli</i>    | <i>Ca_Kabuli_denovo</i>      | 14888070                       | (A/G)       |
| 21165       | CakSNP21165    | <i>Kabuli</i>    | <i>Ca_Kabuli_denovo</i>      | 14891224                       | (G/A)       |
| 21166       | CakSNP21166    | <i>Kabuli</i>    | <i>Ca_Kabuli_denovo</i>      | 14893670                       | (A/C)       |
| 21167       | CakSNP21167    | <i>Kabuli</i>    | <i>Ca_Kabuli_denovo</i>      | 14893855                       | (T/G)       |
| 21168       | CakSNP21168    | <i>Kabuli</i>    | <i>Ca_Kabuli_denovo</i>      | 14895580                       | (A/C)       |
| 21169       | CakSNP21169    | <i>Kabuli</i>    | <i>Ca_Kabuli_denovo</i>      | 14898622                       | (C/T)       |
| 21170       | CakSNP21170    | <i>Kabuli</i>    | <i>Ca_Kabuli_denovo</i>      | 14898764                       | (C/A)       |
| 21171       | CakSNP21171    | <i>Kabuli</i>    | <i>Ca_Kabuli_denovo</i>      | 14899131                       | (T/G)       |
| 21172       | CakSNP21172    | <i>Kabuli</i>    | <i>Ca_Kabuli_denovo</i>      | 14899150                       | (T/C)       |
| 21173       | CakSNP21173    | <i>Kabuli</i>    | <i>Ca_Kabuli_denovo</i>      | 14899484                       | (T/C)       |
| 21174       | CakSNP21174    | <i>Kabuli</i>    | <i>Ca_Kabuli_denovo</i>      | 14905145                       | (C/G)       |
| 21175       | CakSNP21175    | <i>Kabuli</i>    | <i>Ca_Kabuli_denovo</i>      | 14906147                       | (C/G)       |



| <b>S.N.</b> | <b>SNP IDs</b> | <b>Cultivars</b> | <b>Chromosomes/scaffolds</b> | <b>Physical positions (bp)</b> | <b>SNPs</b> |
|-------------|----------------|------------------|------------------------------|--------------------------------|-------------|
| 21176       | CakSNP21176    | <i>Kabuli</i>    | <i>Ca_Kabuli_denovo</i>      | 14907584                       | (C/T)       |
| 21177       | CakSNP21177    | <i>Kabuli</i>    | <i>Ca_Kabuli_denovo</i>      | 14909654                       | (T/G)       |
| 21178       | CakSNP21178    | <i>Kabuli</i>    | <i>Ca_Kabuli_denovo</i>      | 14909803                       | (T/G)       |
| 21179       | CakSNP21179    | <i>Kabuli</i>    | <i>Ca_Kabuli_denovo</i>      | 14912143                       | (A/G)       |
| 21180       | CakSNP21180    | <i>Kabuli</i>    | <i>Ca_Kabuli_denovo</i>      | 14912144                       | (A/G)       |
| 21181       | CakSNP21181    | <i>Kabuli</i>    | <i>Ca_Kabuli_denovo</i>      | 14913605                       | (C/T)       |
| 21182       | CakSNP21182    | <i>Kabuli</i>    | <i>Ca_Kabuli_denovo</i>      | 14914323                       | (G/A)       |
| 21183       | CakSNP21183    | <i>Kabuli</i>    | <i>Ca_Kabuli_denovo</i>      | 14916673                       | (T/C)       |
| 21184       | CakSNP21184    | <i>Kabuli</i>    | <i>Ca_Kabuli_denovo</i>      | 14916715                       | (A/G)       |
| 21185       | CakSNP21185    | <i>Kabuli</i>    | <i>Ca_Kabuli_denovo</i>      | 14918881                       | (G/C)       |
| 21186       | CakSNP21186    | <i>Kabuli</i>    | <i>Ca_Kabuli_denovo</i>      | 14926796                       | (A/G)       |
| 21187       | CakSNP21187    | <i>Kabuli</i>    | <i>Ca_Kabuli_denovo</i>      | 14927585                       | (T/C)       |
| 21188       | CakSNP21188    | <i>Kabuli</i>    | <i>Ca_Kabuli_denovo</i>      | 14929577                       | (A/C)       |
| 21189       | CakSNP21189    | <i>Kabuli</i>    | <i>Ca_Kabuli_denovo</i>      | 14935159                       | (C/A)       |
| 21190       | CakSNP21190    | <i>Kabuli</i>    | <i>Ca_Kabuli_denovo</i>      | 14942882                       | (A/G)       |
| 21191       | CakSNP21191    | <i>Kabuli</i>    | <i>Ca_Kabuli_denovo</i>      | 14942888                       | (A/C)       |
| 21192       | CakSNP21192    | <i>Kabuli</i>    | <i>Ca_Kabuli_denovo</i>      | 14943646                       | (G/A)       |
| 21193       | CakSNP21193    | <i>Kabuli</i>    | <i>Ca_Kabuli_denovo</i>      | 14950163                       | (T/G)       |
| 21194       | CakSNP21194    | <i>Kabuli</i>    | <i>Ca_Kabuli_denovo</i>      | 14962978                       | (T/C)       |
| 21195       | CakSNP21195    | <i>Kabuli</i>    | <i>Ca_Kabuli_denovo</i>      | 14968986                       | (C/A)       |
| 21196       | CakSNP21196    | <i>Kabuli</i>    | <i>Ca_Kabuli_denovo</i>      | 14971785                       | (C/T)       |
| 21197       | CakSNP21197    | <i>Kabuli</i>    | <i>Ca_Kabuli_denovo</i>      | 14974801                       | (G/A)       |
| 21198       | CakSNP21198    | <i>Kabuli</i>    | <i>Ca_Kabuli_denovo</i>      | 14974806                       | (G/A)       |
| 21199       | CakSNP21199    | <i>Kabuli</i>    | <i>Ca_Kabuli_denovo</i>      | 14977193                       | (T/C)       |
| 21200       | CakSNP21200    | <i>Kabuli</i>    | <i>Ca_Kabuli_denovo</i>      | 14978299                       | (A/C)       |
| 21201       | CakSNP21201    | <i>Kabuli</i>    | <i>Ca_Kabuli_denovo</i>      | 14981709                       | (C/T)       |
| 21202       | CakSNP21202    | <i>Kabuli</i>    | <i>Ca_Kabuli_denovo</i>      | 14981741                       | (A/G)       |
| 21203       | CakSNP21203    | <i>Kabuli</i>    | <i>Ca_Kabuli_denovo</i>      | 14982459                       | (G/A)       |
| 21204       | CakSNP21204    | <i>Kabuli</i>    | <i>Ca_Kabuli_denovo</i>      | 14982465                       | (A/C)       |
| 21205       | CakSNP21205    | <i>Kabuli</i>    | <i>Ca_Kabuli_denovo</i>      | 14985193                       | (G/A)       |
| 21206       | CakSNP21206    | <i>Kabuli</i>    | <i>Ca_Kabuli_denovo</i>      | 14985249                       | (G/A)       |
| 21207       | CakSNP21207    | <i>Kabuli</i>    | <i>Ca_Kabuli_denovo</i>      | 14991461                       | (T/C)       |
| 21208       | CakSNP21208    | <i>Kabuli</i>    | <i>Ca_Kabuli_denovo</i>      | 14993274                       | (T/G)       |
| 21209       | CakSNP21209    | <i>Kabuli</i>    | <i>Ca_Kabuli_denovo</i>      | 14998061                       | (T/C)       |
| 21210       | CakSNP21210    | <i>Kabuli</i>    | <i>Ca_Kabuli_denovo</i>      | 15002955                       | (T/C)       |
| 21211       | CakSNP21211    | <i>Kabuli</i>    | <i>Ca_Kabuli_denovo</i>      | 15006029                       | (T/A)       |
| 21212       | CakSNP21212    | <i>Kabuli</i>    | <i>Ca_Kabuli_denovo</i>      | 15007070                       | (G/T)       |
| 21213       | CakSNP21213    | <i>Kabuli</i>    | <i>Ca_Kabuli_denovo</i>      | 15011020                       | (G/A)       |
| 21214       | CakSNP21214    | <i>Kabuli</i>    | <i>Ca_Kabuli_denovo</i>      | 15012544                       | (C/A)       |

| <b>S.N.</b> | <b>SNP IDs</b> | <b>Cultivars</b> | <b>Chromosomes/scaffolds</b> | <b>Physical positions (bp)</b> | <b>SNPs</b> |
|-------------|----------------|------------------|------------------------------|--------------------------------|-------------|
| 21215       | CakSNP21215    | <i>Kabuli</i>    | <i>Ca_Kabuli_denovo</i>      | 15012589                       | (C/T)       |
| 21216       | CakSNP21216    | <i>Kabuli</i>    | <i>Ca_Kabuli_denovo</i>      | 15019523                       | (T/C)       |
| 21217       | CakSNP21217    | <i>Kabuli</i>    | <i>Ca_Kabuli_denovo</i>      | 15019572                       | (G/T)       |
| 21218       | CakSNP21218    | <i>Kabuli</i>    | <i>Ca_Kabuli_denovo</i>      | 15029564                       | (G/A)       |
| 21219       | CakSNP21219    | <i>Kabuli</i>    | <i>Ca_Kabuli_denovo</i>      | 15029594                       | (G/A)       |
| 21220       | CakSNP21220    | <i>Kabuli</i>    | <i>Ca_Kabuli_denovo</i>      | 15029893                       | (T/G)       |
| 21221       | CakSNP21221    | <i>Kabuli</i>    | <i>Ca_Kabuli_denovo</i>      | 15029901                       | (T/C)       |
| 21222       | CakSNP21222    | <i>Kabuli</i>    | <i>Ca_Kabuli_denovo</i>      | 15033418                       | (G/A)       |
| 21223       | CakSNP21223    | <i>Kabuli</i>    | <i>Ca_Kabuli_denovo</i>      | 15048640                       | (G/C)       |
| 21224       | CakSNP21224    | <i>Kabuli</i>    | <i>Ca_Kabuli_denovo</i>      | 15053938                       | (G/C)       |
| 21225       | CakSNP21225    | <i>Kabuli</i>    | <i>Ca_Kabuli_denovo</i>      | 15053965                       | (T/C)       |
| 21226       | CakSNP21226    | <i>Kabuli</i>    | <i>Ca_Kabuli_denovo</i>      | 15055093                       | (G/C)       |
| 21227       | CakSNP21227    | <i>Kabuli</i>    | <i>Ca_Kabuli_denovo</i>      | 15055828                       | (C/A)       |
| 21228       | CakSNP21228    | <i>Kabuli</i>    | <i>Ca_Kabuli_denovo</i>      | 15056085                       | (T/C)       |
| 21229       | CakSNP21229    | <i>Kabuli</i>    | <i>Ca_Kabuli_denovo</i>      | 15056124                       | (C/T)       |
| 21230       | CakSNP21230    | <i>Kabuli</i>    | <i>Ca_Kabuli_denovo</i>      | 15057672                       | (A/G)       |
| 21231       | CakSNP21231    | <i>Kabuli</i>    | <i>Ca_Kabuli_denovo</i>      | 15058226                       | (C/A)       |
| 21232       | CakSNP21232    | <i>Kabuli</i>    | <i>Ca_Kabuli_denovo</i>      | 15061165                       | (A/C)       |
| 21233       | CakSNP21233    | <i>Kabuli</i>    | <i>Ca_Kabuli_denovo</i>      | 15063461                       | (C/T)       |
| 21234       | CakSNP21234    | <i>Kabuli</i>    | <i>Ca_Kabuli_denovo</i>      | 15064384                       | (C/T)       |
| 21235       | CakSNP21235    | <i>Kabuli</i>    | <i>Ca_Kabuli_denovo</i>      | 15068536                       | (G/C)       |
| 21236       | CakSNP21236    | <i>Kabuli</i>    | <i>Ca_Kabuli_denovo</i>      | 15072879                       | (C/T)       |
| 21237       | CakSNP21237    | <i>Kabuli</i>    | <i>Ca_Kabuli_denovo</i>      | 15072882                       | (A/C)       |
| 21238       | CakSNP21238    | <i>Kabuli</i>    | <i>Ca_Kabuli_denovo</i>      | 15076991                       | (G/C)       |
| 21239       | CakSNP21239    | <i>Kabuli</i>    | <i>Ca_Kabuli_denovo</i>      | 15077061                       | (T/C)       |
| 21240       | CakSNP21240    | <i>Kabuli</i>    | <i>Ca_Kabuli_denovo</i>      | 15078562                       | (T/C)       |
| 21241       | CakSNP21241    | <i>Kabuli</i>    | <i>Ca_Kabuli_denovo</i>      | 15078586                       | (G/C)       |
| 21242       | CakSNP21242    | <i>Kabuli</i>    | <i>Ca_Kabuli_denovo</i>      | 15078864                       | (A/G)       |
| 21243       | CakSNP21243    | <i>Kabuli</i>    | <i>Ca_Kabuli_denovo</i>      | 15079985                       | (C/A)       |
| 21244       | CakSNP21244    | <i>Kabuli</i>    | <i>Ca_Kabuli_denovo</i>      | 15079994                       | (A/G)       |
| 21245       | CakSNP21245    | <i>Kabuli</i>    | <i>Ca_Kabuli_denovo</i>      | 15080664                       | (G/A)       |
| 21246       | CakSNP21246    | <i>Kabuli</i>    | <i>Ca_Kabuli_denovo</i>      | 15081288                       | (C/T)       |
| 21247       | CakSNP21247    | <i>Kabuli</i>    | <i>Ca_Kabuli_denovo</i>      | 15081298                       | (G/A)       |
| 21248       | CakSNP21248    | <i>Kabuli</i>    | <i>Ca_Kabuli_denovo</i>      | 15084526                       | (C/T)       |
| 21249       | CakSNP21249    | <i>Kabuli</i>    | <i>Ca_Kabuli_denovo</i>      | 15084576                       | (C/T)       |
| 21250       | CakSNP21250    | <i>Kabuli</i>    | <i>Ca_Kabuli_denovo</i>      | 15097373                       | (A/C)       |
| 21251       | CakSNP21251    | <i>Kabuli</i>    | <i>Ca_Kabuli_denovo</i>      | 15101968                       | (T/C)       |
| 21252       | CakSNP21252    | <i>Kabuli</i>    | <i>Ca_Kabuli_denovo</i>      | 15109364                       | (G/A)       |
| 21253       | CakSNP21253    | <i>Kabuli</i>    | <i>Ca_Kabuli_denovo</i>      | 15111061                       | (T/C)       |

| <b>S.N.</b> | <b>SNP IDs</b> | <b>Cultivars</b> | <b>Chromosomes/scaffolds</b> | <b>Physical positions (bp)</b> | <b>SNPs</b> |
|-------------|----------------|------------------|------------------------------|--------------------------------|-------------|
| 21254       | CakSNP21254    | <i>Kabuli</i>    | <i>Ca_Kabuli_denovo</i>      | 15121640                       | (T/C)       |
| 21255       | CakSNP21255    | <i>Kabuli</i>    | <i>Ca_Kabuli_denovo</i>      | 15122674                       | (A/C)       |
| 21256       | CakSNP21256    | <i>Kabuli</i>    | <i>Ca_Kabuli_denovo</i>      | 15125029                       | (A/C)       |
| 21257       | CakSNP21257    | <i>Kabuli</i>    | <i>Ca_Kabuli_denovo</i>      | 15125256                       | (A/G)       |
| 21258       | CakSNP21258    | <i>Kabuli</i>    | <i>Ca_Kabuli_denovo</i>      | 15128950                       | (C/G)       |
| 21259       | CakSNP21259    | <i>Kabuli</i>    | <i>Ca_Kabuli_denovo</i>      | 15136143                       | (G/A)       |
| 21260       | CakSNP21260    | <i>Kabuli</i>    | <i>Ca_Kabuli_denovo</i>      | 15146085                       | (T/C)       |
| 21261       | CakSNP21261    | <i>Kabuli</i>    | <i>Ca_Kabuli_denovo</i>      | 15146116                       | (C/G)       |
| 21262       | CakSNP21262    | <i>Kabuli</i>    | <i>Ca_Kabuli_denovo</i>      | 15147215                       | (G/C)       |
| 21263       | CakSNP21263    | <i>Kabuli</i>    | <i>Ca_Kabuli_denovo</i>      | 15148861                       | (A/C)       |
| 21264       | CakSNP21264    | <i>Kabuli</i>    | <i>Ca_Kabuli_denovo</i>      | 15148863                       | (A/C)       |
| 21265       | CakSNP21265    | <i>Kabuli</i>    | <i>Ca_Kabuli_denovo</i>      | 15149093                       | (G/T)       |
| 21266       | CakSNP21266    | <i>Kabuli</i>    | <i>Ca_Kabuli_denovo</i>      | 15149102                       | (C/T)       |
| 21267       | CakSNP21267    | <i>Kabuli</i>    | <i>Ca_Kabuli_denovo</i>      | 15162466                       | (C/G)       |
| 21268       | CakSNP21268    | <i>Kabuli</i>    | <i>Ca_Kabuli_denovo</i>      | 15162535                       | (C/G)       |
| 21269       | CakSNP21269    | <i>Kabuli</i>    | <i>Ca_Kabuli_denovo</i>      | 15172412                       | (A/G)       |
| 21270       | CakSNP21270    | <i>Kabuli</i>    | <i>Ca_Kabuli_denovo</i>      | 15173713                       | (G/T)       |
| 21271       | CakSNP21271    | <i>Kabuli</i>    | <i>Ca_Kabuli_denovo</i>      | 15173771                       | (T/G)       |
| 21272       | CakSNP21272    | <i>Kabuli</i>    | <i>Ca_Kabuli_denovo</i>      | 15175666                       | (T/C)       |
| 21273       | CakSNP21273    | <i>Kabuli</i>    | <i>Ca_Kabuli_denovo</i>      | 15178364                       | (A/C)       |
| 21274       | CakSNP21274    | <i>Kabuli</i>    | <i>Ca_Kabuli_denovo</i>      | 15178367                       | (C/T)       |
| 21275       | CakSNP21275    | <i>Kabuli</i>    | <i>Ca_Kabuli_denovo</i>      | 15181189                       | (C/G)       |
| 21276       | CakSNP21276    | <i>Kabuli</i>    | <i>Ca_Kabuli_denovo</i>      | 15193542                       | (A/G)       |
| 21277       | CakSNP21277    | <i>Kabuli</i>    | <i>Ca_Kabuli_denovo</i>      | 15193595                       | (T/G)       |
| 21278       | CakSNP21278    | <i>Kabuli</i>    | <i>Ca_Kabuli_denovo</i>      | 15194474                       | (A/C)       |
| 21279       | CakSNP21279    | <i>Kabuli</i>    | <i>Ca_Kabuli_denovo</i>      | 15194482                       | (A/G)       |
| 21280       | CakSNP21280    | <i>Kabuli</i>    | <i>Ca_Kabuli_denovo</i>      | 15198160                       | (T/C)       |
| 21281       | CakSNP21281    | <i>Kabuli</i>    | <i>Ca_Kabuli_denovo</i>      | 15198174                       | (G/A)       |
| 21282       | CakSNP21282    | <i>Kabuli</i>    | <i>Ca_Kabuli_denovo</i>      | 15198245                       | (A/G)       |
| 21283       | CakSNP21283    | <i>Kabuli</i>    | <i>Ca_Kabuli_denovo</i>      | 15199468                       | (T/C)       |
| 21284       | CakSNP21284    | <i>Kabuli</i>    | <i>Ca_Kabuli_denovo</i>      | 15199489                       | (T/C)       |
| 21285       | CakSNP21285    | <i>Kabuli</i>    | <i>Ca_Kabuli_denovo</i>      | 15199495                       | (G/A)       |
| 21286       | CakSNP21286    | <i>Kabuli</i>    | <i>Ca_Kabuli_denovo</i>      | 15206923                       | (G/A)       |
| 21287       | CakSNP21287    | <i>Kabuli</i>    | <i>Ca_Kabuli_denovo</i>      | 15206935                       | (A/G)       |
| 21288       | CakSNP21288    | <i>Kabuli</i>    | <i>Ca_Kabuli_denovo</i>      | 15209330                       | (A/G)       |
| 21289       | CakSNP21289    | <i>Kabuli</i>    | <i>Ca_Kabuli_denovo</i>      | 15210193                       | (G/A)       |
| 21290       | CakSNP21290    | <i>Kabuli</i>    | <i>Ca_Kabuli_denovo</i>      | 15210344                       | (C/T)       |
| 21291       | CakSNP21291    | <i>Kabuli</i>    | <i>Ca_Kabuli_denovo</i>      | 15211610                       | (A/G)       |
| 21292       | CakSNP21292    | <i>Kabuli</i>    | <i>Ca_Kabuli_denovo</i>      | 15212128                       | (T/C)       |

| <b>S.N.</b> | <b>SNP IDs</b> | <b>Cultivars</b> | <b>Chromosomes/scaffolds</b> | <b>Physical positions (bp)</b> | <b>SNPs</b> |
|-------------|----------------|------------------|------------------------------|--------------------------------|-------------|
| 21293       | CakSNP21293    | <i>Kabuli</i>    | <i>Ca_Kabuli_denovo</i>      | 15212149                       | (T/C)       |
| 21294       | CakSNP21294    | <i>Kabuli</i>    | <i>Ca_Kabuli_denovo</i>      | 15212161                       | (G/C)       |
| 21295       | CakSNP21295    | <i>Kabuli</i>    | <i>Ca_Kabuli_denovo</i>      | 15213006                       | (A/T)       |
| 21296       | CakSNP21296    | <i>Kabuli</i>    | <i>Ca_Kabuli_denovo</i>      | 15226225                       | (G/A)       |
| 21297       | CakSNP21297    | <i>Kabuli</i>    | <i>Ca_Kabuli_denovo</i>      | 15228338                       | (A/C)       |
| 21298       | CakSNP21298    | <i>Kabuli</i>    | <i>Ca_Kabuli_denovo</i>      | 15233099                       | (A/G)       |
| 21299       | CakSNP21299    | <i>Kabuli</i>    | <i>Ca_Kabuli_denovo</i>      | 15237165                       | (T/C)       |
| 21300       | CakSNP21300    | <i>Kabuli</i>    | <i>Ca_Kabuli_denovo</i>      | 15238403                       | (C/G)       |
| 21301       | CakSNP21301    | <i>Kabuli</i>    | <i>Ca_Kabuli_denovo</i>      | 15244019                       | (C/T)       |
| 21302       | CakSNP21302    | <i>Kabuli</i>    | <i>Ca_Kabuli_denovo</i>      | 15245249                       | (G/C)       |
| 21303       | CakSNP21303    | <i>Kabuli</i>    | <i>Ca_Kabuli_denovo</i>      | 15250791                       | (A/C)       |
| 21304       | CakSNP21304    | <i>Kabuli</i>    | <i>Ca_Kabuli_denovo</i>      | 15261871                       | (A/G)       |
| 21305       | CakSNP21305    | <i>Kabuli</i>    | <i>Ca_Kabuli_denovo</i>      | 15262432                       | (T/C)       |
| 21306       | CakSNP21306    | <i>Kabuli</i>    | <i>Ca_Kabuli_denovo</i>      | 15262463                       | (T/C)       |
| 21307       | CakSNP21307    | <i>Kabuli</i>    | <i>Ca_Kabuli_denovo</i>      | 15267483                       | (C/T)       |
| 21308       | CakSNP21308    | <i>Kabuli</i>    | <i>Ca_Kabuli_denovo</i>      | 15267510                       | (T/C)       |
| 21309       | CakSNP21309    | <i>Kabuli</i>    | <i>Ca_Kabuli_denovo</i>      | 15270517                       | (A/G)       |
| 21310       | CakSNP21310    | <i>Kabuli</i>    | <i>Ca_Kabuli_denovo</i>      | 15270541                       | (G/C)       |
| 21311       | CakSNP21311    | <i>Kabuli</i>    | <i>Ca_Kabuli_denovo</i>      | 15271966                       | (G/T)       |
| 21312       | CakSNP21312    | <i>Kabuli</i>    | <i>Ca_Kabuli_denovo</i>      | 15277962                       | (C/A)       |
| 21313       | CakSNP21313    | <i>Kabuli</i>    | <i>Ca_Kabuli_denovo</i>      | 15278013                       | (A/C)       |
| 21314       | CakSNP21314    | <i>Kabuli</i>    | <i>Ca_Kabuli_denovo</i>      | 15278377                       | (C/G)       |
| 21315       | CakSNP21315    | <i>Kabuli</i>    | <i>Ca_Kabuli_denovo</i>      | 15278389                       | (T/C)       |
| 21316       | CakSNP21316    | <i>Kabuli</i>    | <i>Ca_Kabuli_denovo</i>      | 15281124                       | (A/C)       |
| 21317       | CakSNP21317    | <i>Kabuli</i>    | <i>Ca_Kabuli_denovo</i>      | 15281657                       | (C/A)       |
| 21318       | CakSNP21318    | <i>Kabuli</i>    | <i>Ca_Kabuli_denovo</i>      | 15281660                       | (C/G)       |
| 21319       | CakSNP21319    | <i>Kabuli</i>    | <i>Ca_Kabuli_denovo</i>      | 15285712                       | (T/A)       |
| 21320       | CakSNP21320    | <i>Kabuli</i>    | <i>Ca_Kabuli_denovo</i>      | 15286336                       | (C/T)       |
| 21321       | CakSNP21321    | <i>Kabuli</i>    | <i>Ca_Kabuli_denovo</i>      | 15289465                       | (C/T)       |
| 21322       | CakSNP21322    | <i>Kabuli</i>    | <i>Ca_Kabuli_denovo</i>      | 15289612                       | (A/G)       |
| 21323       | CakSNP21323    | <i>Kabuli</i>    | <i>Ca_Kabuli_denovo</i>      | 15298450                       | (G/T)       |
| 21324       | CakSNP21324    | <i>Kabuli</i>    | <i>Ca_Kabuli_denovo</i>      | 15298471                       | (T/A)       |
| 21325       | CakSNP21325    | <i>Kabuli</i>    | <i>Ca_Kabuli_denovo</i>      | 15301323                       | (C/T)       |
| 21326       | CakSNP21326    | <i>Kabuli</i>    | <i>Ca_Kabuli_denovo</i>      | 15301328                       | (C/T)       |
| 21327       | CakSNP21327    | <i>Kabuli</i>    | <i>Ca_Kabuli_denovo</i>      | 15307943                       | (G/C)       |
| 21328       | CakSNP21328    | <i>Kabuli</i>    | <i>Ca_Kabuli_denovo</i>      | 15308754                       | (C/G)       |
| 21329       | CakSNP21329    | <i>Kabuli</i>    | <i>Ca_Kabuli_denovo</i>      | 15310682                       | (A/C)       |
| 21330       | CakSNP21330    | <i>Kabuli</i>    | <i>Ca_Kabuli_denovo</i>      | 15310711                       | (T/C)       |
| 21331       | CakSNP21331    | <i>Kabuli</i>    | <i>Ca_Kabuli_denovo</i>      | 15310717                       | (G/A)       |

| <b>S.N.</b> | <b>SNP IDs</b> | <b>Cultivars</b> | <b>Chromosomes/scaffolds</b> | <b>Physical positions (bp)</b> | <b>SNPs</b> |
|-------------|----------------|------------------|------------------------------|--------------------------------|-------------|
| 21332       | CakSNP21332    | <i>Kabuli</i>    | <i>Ca_Kabuli_denovo</i>      | 15311372                       | (A/T)       |
| 21333       | CakSNP21333    | <i>Kabuli</i>    | <i>Ca_Kabuli_denovo</i>      | 15321205                       | (G/A)       |
| 21334       | CakSNP21334    | <i>Kabuli</i>    | <i>Ca_Kabuli_denovo</i>      | 15325303                       | (C/G)       |
| 21335       | CakSNP21335    | <i>Kabuli</i>    | <i>Ca_Kabuli_denovo</i>      | 15325309                       | (A/C)       |
| 21336       | CakSNP21336    | <i>Kabuli</i>    | <i>Ca_Kabuli_denovo</i>      | 15328163                       | (G/C)       |
| 21337       | CakSNP21337    | <i>Kabuli</i>    | <i>Ca_Kabuli_denovo</i>      | 15339934                       | (C/T)       |
| 21338       | CakSNP21338    | <i>Kabuli</i>    | <i>Ca_Kabuli_denovo</i>      | 15341482                       | (A/G)       |
| 21339       | CakSNP21339    | <i>Kabuli</i>    | <i>Ca_Kabuli_denovo</i>      | 15342107                       | (G/A)       |
| 21340       | CakSNP21340    | <i>Kabuli</i>    | <i>Ca_Kabuli_denovo</i>      | 15343248                       | (C/G)       |
| 21341       | CakSNP21341    | <i>Kabuli</i>    | <i>Ca_Kabuli_denovo</i>      | 15343266                       | (A/G)       |
| 21342       | CakSNP21342    | <i>Kabuli</i>    | <i>Ca_Kabuli_denovo</i>      | 15345196                       | (T/C)       |
| 21343       | CakSNP21343    | <i>Kabuli</i>    | <i>Ca_Kabuli_denovo</i>      | 15345239                       | (T/A)       |
| 21344       | CakSNP21344    | <i>Kabuli</i>    | <i>Ca_Kabuli_denovo</i>      | 15349210                       | (C/T)       |
| 21345       | CakSNP21345    | <i>Kabuli</i>    | <i>Ca_Kabuli_denovo</i>      | 15349219                       | (C/T)       |
| 21346       | CakSNP21346    | <i>Kabuli</i>    | <i>Ca_Kabuli_denovo</i>      | 15350042                       | (C/T)       |
| 21347       | CakSNP21347    | <i>Kabuli</i>    | <i>Ca_Kabuli_denovo</i>      | 15350057                       | (C/G)       |
| 21348       | CakSNP21348    | <i>Kabuli</i>    | <i>Ca_Kabuli_denovo</i>      | 15352453                       | (G/A)       |
| 21349       | CakSNP21349    | <i>Kabuli</i>    | <i>Ca_Kabuli_denovo</i>      | 15352531                       | (A/G)       |
| 21350       | CakSNP21350    | <i>Kabuli</i>    | <i>Ca_Kabuli_denovo</i>      | 15357660                       | (G/C)       |
| 21351       | CakSNP21351    | <i>Kabuli</i>    | <i>Ca_Kabuli_denovo</i>      | 15357668                       | (C/T)       |
| 21352       | CakSNP21352    | <i>Kabuli</i>    | <i>Ca_Kabuli_denovo</i>      | 15358078                       | (C/T)       |
| 21353       | CakSNP21353    | <i>Kabuli</i>    | <i>Ca_Kabuli_denovo</i>      | 15358348                       | (C/T)       |
| 21354       | CakSNP21354    | <i>Kabuli</i>    | <i>Ca_Kabuli_denovo</i>      | 15361024                       | (C/T)       |
| 21355       | CakSNP21355    | <i>Kabuli</i>    | <i>Ca_Kabuli_denovo</i>      | 15361027                       | (A/G)       |
| 21356       | CakSNP21356    | <i>Kabuli</i>    | <i>Ca_Kabuli_denovo</i>      | 15361033                       | (A/C)       |
| 21357       | CakSNP21357    | <i>Kabuli</i>    | <i>Ca_Kabuli_denovo</i>      | 15363103                       | (C/T)       |
| 21358       | CakSNP21358    | <i>Kabuli</i>    | <i>Ca_Kabuli_denovo</i>      | 15363133                       | (A/G)       |
| 21359       | CakSNP21359    | <i>Kabuli</i>    | <i>Ca_Kabuli_denovo</i>      | 15366397                       | (G/A)       |
| 21360       | CakSNP21360    | <i>Kabuli</i>    | <i>Ca_Kabuli_denovo</i>      | 15368258                       | (T/C)       |
| 21361       | CakSNP21361    | <i>Kabuli</i>    | <i>Ca_Kabuli_denovo</i>      | 15368306                       | (A/G)       |
| 21362       | CakSNP21362    | <i>Kabuli</i>    | <i>Ca_Kabuli_denovo</i>      | 15379238                       | (T/C)       |
| 21363       | CakSNP21363    | <i>Kabuli</i>    | <i>Ca_Kabuli_denovo</i>      | 15379241                       | (G/A)       |
| 21364       | CakSNP21364    | <i>Kabuli</i>    | <i>Ca_Kabuli_denovo</i>      | 15383419                       | (T/C)       |
| 21365       | CakSNP21365    | <i>Kabuli</i>    | <i>Ca_Kabuli_denovo</i>      | 15386024                       | (G/A)       |
| 21366       | CakSNP21366    | <i>Kabuli</i>    | <i>Ca_Kabuli_denovo</i>      | 15386083                       | (C/A)       |
| 21367       | CakSNP21367    | <i>Kabuli</i>    | <i>Ca_Kabuli_denovo</i>      | 15387519                       | (C/T)       |
| 21368       | CakSNP21368    | <i>Kabuli</i>    | <i>Ca_Kabuli_denovo</i>      | 15390193                       | (T/G)       |
| 21369       | CakSNP21369    | <i>Kabuli</i>    | <i>Ca_Kabuli_denovo</i>      | 15390614                       | (G/C)       |
| 21370       | CakSNP21370    | <i>Kabuli</i>    | <i>Ca_Kabuli_denovo</i>      | 15390631                       | (G/C)       |

| <b>S.N.</b> | <b>SNP IDs</b> | <b>Cultivars</b> | <b>Chromosomes/scaffolds</b> | <b>Physical positions (bp)</b> | <b>SNPs</b> |
|-------------|----------------|------------------|------------------------------|--------------------------------|-------------|
| 21371       | CakSNP21371    | <i>Kabuli</i>    | <i>Ca_Kabuli_denovo</i>      | 15390776                       | (C/G)       |
| 21372       | CakSNP21372    | <i>Kabuli</i>    | <i>Ca_Kabuli_denovo</i>      | 15390791                       | (G/A)       |
| 21373       | CakSNP21373    | <i>Kabuli</i>    | <i>Ca_Kabuli_denovo</i>      | 15391286                       | (G/A)       |
| 21374       | CakSNP21374    | <i>Kabuli</i>    | <i>Ca_Kabuli_denovo</i>      | 15391314                       | (A/C)       |
| 21375       | CakSNP21375    | <i>Kabuli</i>    | <i>Ca_Kabuli_denovo</i>      | 15397292                       | (G/C)       |
| 21376       | CakSNP21376    | <i>Kabuli</i>    | <i>Ca_Kabuli_denovo</i>      | 15397334                       | (C/G)       |
| 21377       | CakSNP21377    | <i>Kabuli</i>    | <i>Ca_Kabuli_denovo</i>      | 15400127                       | (G/A)       |
| 21378       | CakSNP21378    | <i>Kabuli</i>    | <i>Ca_Kabuli_denovo</i>      | 15400133                       | (A/C)       |
| 21379       | CakSNP21379    | <i>Kabuli</i>    | <i>Ca_Kabuli_denovo</i>      | 15401000                       | (A/G)       |
| 21380       | CakSNP21380    | <i>Kabuli</i>    | <i>Ca_Kabuli_denovo</i>      | 15401033                       | (G/T)       |
| 21381       | CakSNP21381    | <i>Kabuli</i>    | <i>Ca_Kabuli_denovo</i>      | 15406282                       | (A/C)       |
| 21382       | CakSNP21382    | <i>Kabuli</i>    | <i>Ca_Kabuli_denovo</i>      | 15406287                       | (G/C)       |
| 21383       | CakSNP21383    | <i>Kabuli</i>    | <i>Ca_Kabuli_denovo</i>      | 15406288                       | (G/T)       |
| 21384       | CakSNP21384    | <i>Kabuli</i>    | <i>Ca_Kabuli_denovo</i>      | 15407414                       | (T/G)       |
| 21385       | CakSNP21385    | <i>Kabuli</i>    | <i>Ca_Kabuli_denovo</i>      | 15407444                       | (A/G)       |
| 21386       | CakSNP21386    | <i>Kabuli</i>    | <i>Ca_Kabuli_denovo</i>      | 15414998                       | (A/G)       |
| 21387       | CakSNP21387    | <i>Kabuli</i>    | <i>Ca_Kabuli_denovo</i>      | 15417467                       | (A/G)       |
| 21388       | CakSNP21388    | <i>Kabuli</i>    | <i>Ca_Kabuli_denovo</i>      | 15424718                       | (C/G)       |
| 21389       | CakSNP21389    | <i>Kabuli</i>    | <i>Ca_Kabuli_denovo</i>      | 15425714                       | (A/G)       |
| 21390       | CakSNP21390    | <i>Kabuli</i>    | <i>Ca_Kabuli_denovo</i>      | 15426125                       | (A/G)       |
| 21391       | CakSNP21391    | <i>Kabuli</i>    | <i>Ca_Kabuli_denovo</i>      | 15428336                       | (G/C)       |
| 21392       | CakSNP21392    | <i>Kabuli</i>    | <i>Ca_Kabuli_denovo</i>      | 15430885                       | (T/G)       |
| 21393       | CakSNP21393    | <i>Kabuli</i>    | <i>Ca_Kabuli_denovo</i>      | 15431873                       | (G/C)       |
| 21394       | CakSNP21394    | <i>Kabuli</i>    | <i>Ca_Kabuli_denovo</i>      | 15431888                       | (C/T)       |
| 21395       | CakSNP21395    | <i>Kabuli</i>    | <i>Ca_Kabuli_denovo</i>      | 15431906                       | (C/G)       |
| 21396       | CakSNP21396    | <i>Kabuli</i>    | <i>Ca_Kabuli_denovo</i>      | 15431918                       | (C/T)       |
| 21397       | CakSNP21397    | <i>Kabuli</i>    | <i>Ca_Kabuli_denovo</i>      | 15440132                       | (A/C)       |
| 21398       | CakSNP21398    | <i>Kabuli</i>    | <i>Ca_Kabuli_denovo</i>      | 15441290                       | (A/C)       |
| 21399       | CakSNP21399    | <i>Kabuli</i>    | <i>Ca_Kabuli_denovo</i>      | 15441305                       | (A/G)       |
| 21400       | CakSNP21400    | <i>Kabuli</i>    | <i>Ca_Kabuli_denovo</i>      | 15455235                       | (G/T)       |
| 21401       | CakSNP21401    | <i>Kabuli</i>    | <i>Ca_Kabuli_denovo</i>      | 15455296                       | (C/G)       |
| 21402       | CakSNP21402    | <i>Kabuli</i>    | <i>Ca_Kabuli_denovo</i>      | 15456996                       | (G/A)       |
| 21403       | CakSNP21403    | <i>Kabuli</i>    | <i>Ca_Kabuli_denovo</i>      | 15458395                       | (C/T)       |
| 21404       | CakSNP21404    | <i>Kabuli</i>    | <i>Ca_Kabuli_denovo</i>      | 15458942                       | (G/A)       |
| 21405       | CakSNP21405    | <i>Kabuli</i>    | <i>Ca_Kabuli_denovo</i>      | 15460422                       | (A/G)       |
| 21406       | CakSNP21406    | <i>Kabuli</i>    | <i>Ca_Kabuli_denovo</i>      | 15460460                       | (G/A)       |
| 21407       | CakSNP21407    | <i>Kabuli</i>    | <i>Ca_Kabuli_denovo</i>      | 15464054                       | (C/T)       |
| 21408       | CakSNP21408    | <i>Kabuli</i>    | <i>Ca_Kabuli_denovo</i>      | 15464063                       | (A/G)       |
| 21409       | CakSNP21409    | <i>Kabuli</i>    | <i>Ca_Kabuli_denovo</i>      | 15464257                       | (C/T)       |

| <b>S.N.</b> | <b>SNP IDs</b> | <b>Cultivars</b> | <b>Chromosomes/scaffolds</b> | <b>Physical positions (bp)</b> | <b>SNPs</b> |
|-------------|----------------|------------------|------------------------------|--------------------------------|-------------|
| 21410       | CakSNP21410    | <i>Kabuli</i>    | <i>Ca_Kabuli_denovo</i>      | 15464599                       | (A/G)       |
| 21411       | CakSNP21411    | <i>Kabuli</i>    | <i>Ca_Kabuli_denovo</i>      | 15468646                       | (C/T)       |
| 21412       | CakSNP21412    | <i>Kabuli</i>    | <i>Ca_Kabuli_denovo</i>      | 15469155                       | (C/T)       |
| 21413       | CakSNP21413    | <i>Kabuli</i>    | <i>Ca_Kabuli_denovo</i>      | 15474029                       | (A/G)       |
| 21414       | CakSNP21414    | <i>Kabuli</i>    | <i>Ca_Kabuli_denovo</i>      | 15474040                       | (T/G)       |
| 21415       | CakSNP21415    | <i>Kabuli</i>    | <i>Ca_Kabuli_denovo</i>      | 15474052                       | (C/A)       |
| 21416       | CakSNP21416    | <i>Kabuli</i>    | <i>Ca_Kabuli_denovo</i>      | 15474082                       | (G/T)       |
| 21417       | CakSNP21417    | <i>Kabuli</i>    | <i>Ca_Kabuli_denovo</i>      | 15475209                       | (C/G)       |
| 21418       | CakSNP21418    | <i>Kabuli</i>    | <i>Ca_Kabuli_denovo</i>      | 15475225                       | (T/C)       |
| 21419       | CakSNP21419    | <i>Kabuli</i>    | <i>Ca_Kabuli_denovo</i>      | 15478410                       | (T/G)       |
| 21420       | CakSNP21420    | <i>Kabuli</i>    | <i>Ca_Kabuli_denovo</i>      | 15480813                       | (C/T)       |
| 21421       | CakSNP21421    | <i>Kabuli</i>    | <i>Ca_Kabuli_denovo</i>      | 15480822                       | (C/T)       |
| 21422       | CakSNP21422    | <i>Kabuli</i>    | <i>Ca_Kabuli_denovo</i>      | 15491990                       | (T/C)       |
| 21423       | CakSNP21423    | <i>Kabuli</i>    | <i>Ca_Kabuli_denovo</i>      | 15491996                       | (G/A)       |
| 21424       | CakSNP21424    | <i>Kabuli</i>    | <i>Ca_Kabuli_denovo</i>      | 15499304                       | (G/T)       |
| 21425       | CakSNP21425    | <i>Kabuli</i>    | <i>Ca_Kabuli_denovo</i>      | 15499316                       | (T/C)       |
| 21426       | CakSNP21426    | <i>Kabuli</i>    | <i>Ca_Kabuli_denovo</i>      | 15499338                       | (T/G)       |
| 21427       | CakSNP21427    | <i>Kabuli</i>    | <i>Ca_Kabuli_denovo</i>      | 15506868                       | (C/T)       |
| 21428       | CakSNP21428    | <i>Kabuli</i>    | <i>Ca_Kabuli_denovo</i>      | 15507953                       | (G/T)       |
| 21429       | CakSNP21429    | <i>Kabuli</i>    | <i>Ca_Kabuli_denovo</i>      | 15507965                       | (A/G)       |
| 21430       | CakSNP21430    | <i>Kabuli</i>    | <i>Ca_Kabuli_denovo</i>      | 15521689                       | (T/C)       |
| 21431       | CakSNP21431    | <i>Kabuli</i>    | <i>Ca_Kabuli_denovo</i>      | 15522761                       | (G/A)       |
| 21432       | CakSNP21432    | <i>Kabuli</i>    | <i>Ca_Kabuli_denovo</i>      | 15522773                       | (G/A)       |
| 21433       | CakSNP21433    | <i>Kabuli</i>    | <i>Ca_Kabuli_denovo</i>      | 15524716                       | (G/T)       |
| 21434       | CakSNP21434    | <i>Kabuli</i>    | <i>Ca_Kabuli_denovo</i>      | 15524717                       | (T/C)       |
| 21435       | CakSNP21435    | <i>Kabuli</i>    | <i>Ca_Kabuli_denovo</i>      | 15524990                       | (T/C)       |
| 21436       | CakSNP21436    | <i>Kabuli</i>    | <i>Ca_Kabuli_denovo</i>      | 15526190                       | (A/G)       |
| 21437       | CakSNP21437    | <i>Kabuli</i>    | <i>Ca_Kabuli_denovo</i>      | 15530285                       | (T/G)       |
| 21438       | CakSNP21438    | <i>Kabuli</i>    | <i>Ca_Kabuli_denovo</i>      | 15531595                       | (T/C)       |
| 21439       | CakSNP21439    | <i>Kabuli</i>    | <i>Ca_Kabuli_denovo</i>      | 15552032                       | (A/G)       |
| 21440       | CakSNP21440    | <i>Kabuli</i>    | <i>Ca_Kabuli_denovo</i>      | 15564979                       | (C/T)       |
| 21441       | CakSNP21441    | <i>Kabuli</i>    | <i>Ca_Kabuli_denovo</i>      | 15566724                       | (T/A)       |
| 21442       | CakSNP21442    | <i>Kabuli</i>    | <i>Ca_Kabuli_denovo</i>      | 15568183                       | (T/C)       |
| 21443       | CakSNP21443    | <i>Kabuli</i>    | <i>Ca_Kabuli_denovo</i>      | 15568192                       | (G/T)       |
| 21444       | CakSNP21444    | <i>Kabuli</i>    | <i>Ca_Kabuli_denovo</i>      | 15575379                       | (A/G)       |
| 21445       | CakSNP21445    | <i>Kabuli</i>    | <i>Ca_Kabuli_denovo</i>      | 15575382                       | (G/C)       |
| 21446       | CakSNP21446    | <i>Kabuli</i>    | <i>Ca_Kabuli_denovo</i>      | 15576520                       | (G/C)       |
| 21447       | CakSNP21447    | <i>Kabuli</i>    | <i>Ca_Kabuli_denovo</i>      | 15582787                       | (T/C)       |
| 21448       | CakSNP21448    | <i>Kabuli</i>    | <i>Ca_Kabuli_denovo</i>      | 15582800                       | (C/G)       |

| <b>S.N.</b> | <b>SNP IDs</b> | <b>Cultivars</b> | <b>Chromosomes/scaffolds</b> | <b>Physical positions (bp)</b> | <b>SNPs</b> |
|-------------|----------------|------------------|------------------------------|--------------------------------|-------------|
| 21449       | CakSNP21449    | <i>Kabuli</i>    | <i>Ca_Kabuli_denovo</i>      | 15590817                       | (A/G)       |
| 21450       | CakSNP21450    | <i>Kabuli</i>    | <i>Ca_Kabuli_denovo</i>      | 15591832                       | (T/C)       |
| 21451       | CakSNP21451    | <i>Kabuli</i>    | <i>Ca_Kabuli_denovo</i>      | 15595473                       | (C/A)       |
| 21452       | CakSNP21452    | <i>Kabuli</i>    | <i>Ca_Kabuli_denovo</i>      | 15597791                       | (G/A)       |
| 21453       | CakSNP21453    | <i>Kabuli</i>    | <i>Ca_Kabuli_denovo</i>      | 15597799                       | (C/A)       |
| 21454       | CakSNP21454    | <i>Kabuli</i>    | <i>Ca_Kabuli_denovo</i>      | 15603179                       | (A/G)       |
| 21455       | CakSNP21455    | <i>Kabuli</i>    | <i>Ca_Kabuli_denovo</i>      | 15603193                       | (T/C)       |
| 21456       | CakSNP21456    | <i>Kabuli</i>    | <i>Ca_Kabuli_denovo</i>      | 15606500                       | (G/A)       |
| 21457       | CakSNP21457    | <i>Kabuli</i>    | <i>Ca_Kabuli_denovo</i>      | 15609823                       | (G/A)       |
| 21458       | CakSNP21458    | <i>Kabuli</i>    | <i>Ca_Kabuli_denovo</i>      | 15611115                       | (G/C)       |
| 21459       | CakSNP21459    | <i>Kabuli</i>    | <i>Ca_Kabuli_denovo</i>      | 15611121                       | (C/T)       |
| 21460       | CakSNP21460    | <i>Kabuli</i>    | <i>Ca_Kabuli_denovo</i>      | 15620902                       | (C/T)       |
| 21461       | CakSNP21461    | <i>Kabuli</i>    | <i>Ca_Kabuli_denovo</i>      | 15620920                       | (G/T)       |
| 21462       | CakSNP21462    | <i>Kabuli</i>    | <i>Ca_Kabuli_denovo</i>      | 15620944                       | (C/G)       |
| 21463       | CakSNP21463    | <i>Kabuli</i>    | <i>Ca_Kabuli_denovo</i>      | 15621127                       | (G/A)       |
| 21464       | CakSNP21464    | <i>Kabuli</i>    | <i>Ca_Kabuli_denovo</i>      | 15628387                       | (T/C)       |
| 21465       | CakSNP21465    | <i>Kabuli</i>    | <i>Ca_Kabuli_denovo</i>      | 15631264                       | (G/T)       |
| 21466       | CakSNP21466    | <i>Kabuli</i>    | <i>Ca_Kabuli_denovo</i>      | 15631270                       | (A/G)       |
| 21467       | CakSNP21467    | <i>Kabuli</i>    | <i>Ca_Kabuli_denovo</i>      | 15631562                       | (C/A)       |
| 21468       | CakSNP21468    | <i>Kabuli</i>    | <i>Ca_Kabuli_denovo</i>      | 15633158                       | (C/A)       |
| 21469       | CakSNP21469    | <i>Kabuli</i>    | <i>Ca_Kabuli_denovo</i>      | 15637429                       | (G/T)       |
| 21470       | CakSNP21470    | <i>Kabuli</i>    | <i>Ca_Kabuli_denovo</i>      | 15638521                       | (C/G)       |
| 21471       | CakSNP21471    | <i>Kabuli</i>    | <i>Ca_Kabuli_denovo</i>      | 15638548                       | (A/G)       |
| 21472       | CakSNP21472    | <i>Kabuli</i>    | <i>Ca_Kabuli_denovo</i>      | 15640495                       | (C/T)       |
| 21473       | CakSNP21473    | <i>Kabuli</i>    | <i>Ca_Kabuli_denovo</i>      | 15643259                       | (G/A)       |
| 21474       | CakSNP21474    | <i>Kabuli</i>    | <i>Ca_Kabuli_denovo</i>      | 15643271                       | (T/C)       |
| 21475       | CakSNP21475    | <i>Kabuli</i>    | <i>Ca_Kabuli_denovo</i>      | 15643735                       | (C/T)       |
| 21476       | CakSNP21476    | <i>Kabuli</i>    | <i>Ca_Kabuli_denovo</i>      | 15643743                       | (A/G)       |
| 21477       | CakSNP21477    | <i>Kabuli</i>    | <i>Ca_Kabuli_denovo</i>      | 15643912                       | (T/C)       |
| 21478       | CakSNP21478    | <i>Kabuli</i>    | <i>Ca_Kabuli_denovo</i>      | 15643960                       | (C/T)       |
| 21479       | CakSNP21479    | <i>Kabuli</i>    | <i>Ca_Kabuli_denovo</i>      | 15644967                       | (A/C)       |
| 21480       | CakSNP21480    | <i>Kabuli</i>    | <i>Ca_Kabuli_denovo</i>      | 15647635                       | (A/G)       |
| 21481       | CakSNP21481    | <i>Kabuli</i>    | <i>Ca_Kabuli_denovo</i>      | 15650816                       | (G/A)       |
| 21482       | CakSNP21482    | <i>Kabuli</i>    | <i>Ca_Kabuli_denovo</i>      | 15656144                       | (T/C)       |
| 21483       | CakSNP21483    | <i>Kabuli</i>    | <i>Ca_Kabuli_denovo</i>      | 15662922                       | (A/G)       |
| 21484       | CakSNP21484    | <i>Kabuli</i>    | <i>Ca_Kabuli_denovo</i>      | 15662923                       | (A/G)       |
| 21485       | CakSNP21485    | <i>Kabuli</i>    | <i>Ca_Kabuli_denovo</i>      | 15668904                       | (C/G)       |
| 21486       | CakSNP21486    | <i>Kabuli</i>    | <i>Ca_Kabuli_denovo</i>      | 15672757                       | (G/A)       |
| 21487       | CakSNP21487    | <i>Kabuli</i>    | <i>Ca_Kabuli_denovo</i>      | 15672819                       | (C/A)       |



| <b>S.N.</b> | <b>SNP IDs</b> | <b>Cultivars</b> | <b>Chromosomes/scaffolds</b> | <b>Physical positions (bp)</b> | <b>SNPs</b> |
|-------------|----------------|------------------|------------------------------|--------------------------------|-------------|
| 21488       | CakSNP21488    | <i>Kabuli</i>    | <i>Ca_Kabuli_denovo</i>      | 15676871                       | (A/G)       |
| 21489       | CakSNP21489    | <i>Kabuli</i>    | <i>Ca_Kabuli_denovo</i>      | 15679048                       | (C/T)       |
| 21490       | CakSNP21490    | <i>Kabuli</i>    | <i>Ca_Kabuli_denovo</i>      | 15682338                       | (A/G)       |
| 21491       | CakSNP21491    | <i>Kabuli</i>    | <i>Ca_Kabuli_denovo</i>      | 15686389                       | (G/A)       |
| 21492       | CakSNP21492    | <i>Kabuli</i>    | <i>Ca_Kabuli_denovo</i>      | 15689140                       | (T/G)       |
| 21493       | CakSNP21493    | <i>Kabuli</i>    | <i>Ca_Kabuli_denovo</i>      | 15689179                       | (A/G)       |
| 21494       | CakSNP21494    | <i>Kabuli</i>    | <i>Ca_Kabuli_denovo</i>      | 15693017                       | (A/G)       |
| 21495       | CakSNP21495    | <i>Kabuli</i>    | <i>Ca_Kabuli_denovo</i>      | 15693033                       | (A/C)       |
| 21496       | CakSNP21496    | <i>Kabuli</i>    | <i>Ca_Kabuli_denovo</i>      | 15696764                       | (T/G)       |
| 21497       | CakSNP21497    | <i>Kabuli</i>    | <i>Ca_Kabuli_denovo</i>      | 15710031                       | (A/C)       |
| 21498       | CakSNP21498    | <i>Kabuli</i>    | <i>Ca_Kabuli_denovo</i>      | 15724677                       | (T/C)       |
| 21499       | CakSNP21499    | <i>Kabuli</i>    | <i>Ca_Kabuli_denovo</i>      | 15729201                       | (C/T)       |
| 21500       | CakSNP21500    | <i>Kabuli</i>    | <i>Ca_Kabuli_denovo</i>      | 15730162                       | (T/C)       |
| 21501       | CakSNP21501    | <i>Kabuli</i>    | <i>Ca_Kabuli_denovo</i>      | 15731996                       | (T/C)       |
| 21502       | CakSNP21502    | <i>Kabuli</i>    | <i>Ca_Kabuli_denovo</i>      | 15732030                       | (C/T)       |
| 21503       | CakSNP21503    | <i>Kabuli</i>    | <i>Ca_Kabuli_denovo</i>      | 15737951                       | (G/C)       |
| 21504       | CakSNP21504    | <i>Kabuli</i>    | <i>Ca_Kabuli_denovo</i>      | 15738002                       | (A/G)       |
| 21505       | CakSNP21505    | <i>Kabuli</i>    | <i>Ca_Kabuli_denovo</i>      | 15738908                       | (T/C)       |
| 21506       | CakSNP21506    | <i>Kabuli</i>    | <i>Ca_Kabuli_denovo</i>      | 15738922                       | (T/C)       |
| 21507       | CakSNP21507    | <i>Kabuli</i>    | <i>Ca_Kabuli_denovo</i>      | 15742863                       | (C/T)       |
| 21508       | CakSNP21508    | <i>Kabuli</i>    | <i>Ca_Kabuli_denovo</i>      | 15746595                       | (T/G)       |
| 21509       | CakSNP21509    | <i>Kabuli</i>    | <i>Ca_Kabuli_denovo</i>      | 15746721                       | (A/G)       |
| 21510       | CakSNP21510    | <i>Kabuli</i>    | <i>Ca_Kabuli_denovo</i>      | 15748786                       | (T/C)       |
| 21511       | CakSNP21511    | <i>Kabuli</i>    | <i>Ca_Kabuli_denovo</i>      | 15750852                       | (A/C)       |
| 21512       | CakSNP21512    | <i>Kabuli</i>    | <i>Ca_Kabuli_denovo</i>      | 15750903                       | (T/A)       |
| 21513       | CakSNP21513    | <i>Kabuli</i>    | <i>Ca_Kabuli_denovo</i>      | 15750933                       | (C/T)       |
| 21514       | CakSNP21514    | <i>Kabuli</i>    | <i>Ca_Kabuli_denovo</i>      | 15756831                       | (C/A)       |
| 21515       | CakSNP21515    | <i>Kabuli</i>    | <i>Ca_Kabuli_denovo</i>      | 15760646                       | (C/G)       |
| 21516       | CakSNP21516    | <i>Kabuli</i>    | <i>Ca_Kabuli_denovo</i>      | 15760923                       | (A/C)       |
| 21517       | CakSNP21517    | <i>Kabuli</i>    | <i>Ca_Kabuli_denovo</i>      | 15766715                       | (C/T)       |
| 21518       | CakSNP21518    | <i>Kabuli</i>    | <i>Ca_Kabuli_denovo</i>      | 15766718                       | (G/T)       |
| 21519       | CakSNP21519    | <i>Kabuli</i>    | <i>Ca_Kabuli_denovo</i>      | 15769597                       | (C/T)       |
| 21520       | CakSNP21520    | <i>Kabuli</i>    | <i>Ca_Kabuli_denovo</i>      | 15775001                       | (G/A)       |
| 21521       | CakSNP21521    | <i>Kabuli</i>    | <i>Ca_Kabuli_denovo</i>      | 15777288                       | (T/G)       |
| 21522       | CakSNP21522    | <i>Kabuli</i>    | <i>Ca_Kabuli_denovo</i>      | 15779882                       | (G/C)       |
| 21523       | CakSNP21523    | <i>Kabuli</i>    | <i>Ca_Kabuli_denovo</i>      | 15780781                       | (C/T)       |
| 21524       | CakSNP21524    | <i>Kabuli</i>    | <i>Ca_Kabuli_denovo</i>      | 15781142                       | (G/A)       |
| 21525       | CakSNP21525    | <i>Kabuli</i>    | <i>Ca_Kabuli_denovo</i>      | 15781160                       | (G/A)       |
| 21526       | CakSNP21526    | <i>Kabuli</i>    | <i>Ca_Kabuli_denovo</i>      | 15791427                       | (C/A)       |

| <b>S.N.</b> | <b>SNP IDs</b> | <b>Cultivars</b> | <b>Chromosomes/scaffolds</b> | <b>Physical positions (bp)</b> | <b>SNPs</b> |
|-------------|----------------|------------------|------------------------------|--------------------------------|-------------|
| 21527       | CakSNP21527    | <i>Kabuli</i>    | <i>Ca_Kabuli_denovo</i>      | 15791472                       | (C/G)       |
| 21528       | CakSNP21528    | <i>Kabuli</i>    | <i>Ca_Kabuli_denovo</i>      | 15792255                       | (C/T)       |
| 21529       | CakSNP21529    | <i>Kabuli</i>    | <i>Ca_Kabuli_denovo</i>      | 15806405                       | (G/A)       |
| 21530       | CakSNP21530    | <i>Kabuli</i>    | <i>Ca_Kabuli_denovo</i>      | 15816444                       | (G/C)       |
| 21531       | CakSNP21531    | <i>Kabuli</i>    | <i>Ca_Kabuli_denovo</i>      | 15816474                       | (A/C)       |
| 21532       | CakSNP21532    | <i>Kabuli</i>    | <i>Ca_Kabuli_denovo</i>      | 15817830                       | (A/G)       |
| 21533       | CakSNP21533    | <i>Kabuli</i>    | <i>Ca_Kabuli_denovo</i>      | 15820384                       | (T/C)       |
| 21534       | CakSNP21534    | <i>Kabuli</i>    | <i>Ca_Kabuli_denovo</i>      | 15827646                       | (G/C)       |
| 21535       | CakSNP21535    | <i>Kabuli</i>    | <i>Ca_Kabuli_denovo</i>      | 15835243                       | (A/T)       |
| 21536       | CakSNP21536    | <i>Kabuli</i>    | <i>Ca_Kabuli_denovo</i>      | 15840418                       | (C/T)       |
| 21537       | CakSNP21537    | <i>Kabuli</i>    | <i>Ca_Kabuli_denovo</i>      | 15843233                       | (T/A)       |
| 21538       | CakSNP21538    | <i>Kabuli</i>    | <i>Ca_Kabuli_denovo</i>      | 15846580                       | (C/T)       |
| 21539       | CakSNP21539    | <i>Kabuli</i>    | <i>Ca_Kabuli_denovo</i>      | 15846593                       | (T/C)       |
| 21540       | CakSNP21540    | <i>Kabuli</i>    | <i>Ca_Kabuli_denovo</i>      | 15848981                       | (A/G)       |
| 21541       | CakSNP21541    | <i>Kabuli</i>    | <i>Ca_Kabuli_denovo</i>      | 15848984                       | (G/C)       |
| 21542       | CakSNP21542    | <i>Kabuli</i>    | <i>Ca_Kabuli_denovo</i>      | 15853479                       | (G/C)       |
| 21543       | CakSNP21543    | <i>Kabuli</i>    | <i>Ca_Kabuli_denovo</i>      | 15855332                       | (G/T)       |
| 21544       | CakSNP21544    | <i>Kabuli</i>    | <i>Ca_Kabuli_denovo</i>      | 15857901                       | (A/G)       |
| 21545       | CakSNP21545    | <i>Kabuli</i>    | <i>Ca_Kabuli_denovo</i>      | 15858482                       | (A/G)       |
| 21546       | CakSNP21546    | <i>Kabuli</i>    | <i>Ca_Kabuli_denovo</i>      | 15858484                       | (C/G)       |
| 21547       | CakSNP21547    | <i>Kabuli</i>    | <i>Ca_Kabuli_denovo</i>      | 15866668                       | (A/G)       |
| 21548       | CakSNP21548    | <i>Kabuli</i>    | <i>Ca_Kabuli_denovo</i>      | 15867686                       | (T/G)       |
| 21549       | CakSNP21549    | <i>Kabuli</i>    | <i>Ca_Kabuli_denovo</i>      | 15873998                       | (C/T)       |
| 21550       | CakSNP21550    | <i>Kabuli</i>    | <i>Ca_Kabuli_denovo</i>      | 15874929                       | (G/A)       |
| 21551       | CakSNP21551    | <i>Kabuli</i>    | <i>Ca_Kabuli_denovo</i>      | 15874948                       | (A/G)       |
| 21552       | CakSNP21552    | <i>Kabuli</i>    | <i>Ca_Kabuli_denovo</i>      | 15875007                       | (G/A)       |
| 21553       | CakSNP21553    | <i>Kabuli</i>    | <i>Ca_Kabuli_denovo</i>      | 15876783                       | (A/G)       |
| 21554       | CakSNP21554    | <i>Kabuli</i>    | <i>Ca_Kabuli_denovo</i>      | 15884976                       | (C/G)       |
| 21555       | CakSNP21555    | <i>Kabuli</i>    | <i>Ca_Kabuli_denovo</i>      | 15887807                       | (G/A)       |
| 21556       | CakSNP21556    | <i>Kabuli</i>    | <i>Ca_Kabuli_denovo</i>      | 15892953                       | (T/C)       |
| 21557       | CakSNP21557    | <i>Kabuli</i>    | <i>Ca_Kabuli_denovo</i>      | 15893254                       | (T/C)       |
| 21558       | CakSNP21558    | <i>Kabuli</i>    | <i>Ca_Kabuli_denovo</i>      | 15893260                       | (A/G)       |
| 21559       | CakSNP21559    | <i>Kabuli</i>    | <i>Ca_Kabuli_denovo</i>      | 15893327                       | (A/C)       |
| 21560       | CakSNP21560    | <i>Kabuli</i>    | <i>Ca_Kabuli_denovo</i>      | 15893329                       | (A/C)       |
| 21561       | CakSNP21561    | <i>Kabuli</i>    | <i>Ca_Kabuli_denovo</i>      | 15897534                       | (A/G)       |
| 21562       | CakSNP21562    | <i>Kabuli</i>    | <i>Ca_Kabuli_denovo</i>      | 15897602                       | (C/T)       |
| 21563       | CakSNP21563    | <i>Kabuli</i>    | <i>Ca_Kabuli_denovo</i>      | 15903773                       | (G/T)       |
| 21564       | CakSNP21564    | <i>Kabuli</i>    | <i>Ca_Kabuli_denovo</i>      | 15903815                       | (A/G)       |
| 21565       | CakSNP21565    | <i>Kabuli</i>    | <i>Ca_Kabuli_denovo</i>      | 15905649                       | (C/G)       |

| <b>S.N.</b> | <b>SNP IDs</b> | <b>Cultivars</b> | <b>Chromosomes/scaffolds</b> | <b>Physical positions (bp)</b> | <b>SNPs</b> |
|-------------|----------------|------------------|------------------------------|--------------------------------|-------------|
| 21566       | CakSNP21566    | <i>Kabuli</i>    | <i>Ca_Kabuli_denovo</i>      | 15907232                       | (T/C)       |
| 21567       | CakSNP21567    | <i>Kabuli</i>    | <i>Ca_Kabuli_denovo</i>      | 15908094                       | (G/C)       |
| 21568       | CakSNP21568    | <i>Kabuli</i>    | <i>Ca_Kabuli_denovo</i>      | 15911035                       | (T/C)       |
| 21569       | CakSNP21569    | <i>Kabuli</i>    | <i>Ca_Kabuli_denovo</i>      | 15924073                       | (C/T)       |
| 21570       | CakSNP21570    | <i>Kabuli</i>    | <i>Ca_Kabuli_denovo</i>      | 15929633                       | (T/A)       |
| 21571       | CakSNP21571    | <i>Kabuli</i>    | <i>Ca_Kabuli_denovo</i>      | 15929674                       | (T/C)       |
| 21572       | CakSNP21572    | <i>Kabuli</i>    | <i>Ca_Kabuli_denovo</i>      | 15930740                       | (G/A)       |
| 21573       | CakSNP21573    | <i>Kabuli</i>    | <i>Ca_Kabuli_denovo</i>      | 15930808                       | (C/T)       |
| 21574       | CakSNP21574    | <i>Kabuli</i>    | <i>Ca_Kabuli_denovo</i>      | 15931690                       | (C/G)       |
| 21575       | CakSNP21575    | <i>Kabuli</i>    | <i>Ca_Kabuli_denovo</i>      | 15931714                       | (G/T)       |
| 21576       | CakSNP21576    | <i>Kabuli</i>    | <i>Ca_Kabuli_denovo</i>      | 15932330                       | (A/G)       |
| 21577       | CakSNP21577    | <i>Kabuli</i>    | <i>Ca_Kabuli_denovo</i>      | 15934836                       | (C/T)       |
| 21578       | CakSNP21578    | <i>Kabuli</i>    | <i>Ca_Kabuli_denovo</i>      | 15937570                       | (A/G)       |
| 21579       | CakSNP21579    | <i>Kabuli</i>    | <i>Ca_Kabuli_denovo</i>      | 15951873                       | (G/A)       |
| 21580       | CakSNP21580    | <i>Kabuli</i>    | <i>Ca_Kabuli_denovo</i>      | 15952688                       | (A/G)       |
| 21581       | CakSNP21581    | <i>Kabuli</i>    | <i>Ca_Kabuli_denovo</i>      | 15952703                       | (A/G)       |
| 21582       | CakSNP21582    | <i>Kabuli</i>    | <i>Ca_Kabuli_denovo</i>      | 15970245                       | (G/A)       |
| 21583       | CakSNP21583    | <i>Kabuli</i>    | <i>Ca_Kabuli_denovo</i>      | 15972570                       | (G/T)       |
| 21584       | CakSNP21584    | <i>Kabuli</i>    | <i>Ca_Kabuli_denovo</i>      | 15972591                       | (C/G)       |
| 21585       | CakSNP21585    | <i>Kabuli</i>    | <i>Ca_Kabuli_denovo</i>      | 15977624                       | (G/T)       |
| 21586       | CakSNP21586    | <i>Kabuli</i>    | <i>Ca_Kabuli_denovo</i>      | 15980240                       | (A/T)       |
| 21587       | CakSNP21587    | <i>Kabuli</i>    | <i>Ca_Kabuli_denovo</i>      | 15992568                       | (C/G)       |
| 21588       | CakSNP21588    | <i>Kabuli</i>    | <i>Ca_Kabuli_denovo</i>      | 15996800                       | (A/C)       |
| 21589       | CakSNP21589    | <i>Kabuli</i>    | <i>Ca_Kabuli_denovo</i>      | 15997796                       | (A/T)       |
| 21590       | CakSNP21590    | <i>Kabuli</i>    | <i>Ca_Kabuli_denovo</i>      | 15997817                       | (G/A)       |
| 21591       | CakSNP21591    | <i>Kabuli</i>    | <i>Ca_Kabuli_denovo</i>      | 16007356                       | (G/C)       |
| 21592       | CakSNP21592    | <i>Kabuli</i>    | <i>Ca_Kabuli_denovo</i>      | 16016229                       | (T/C)       |
| 21593       | CakSNP21593    | <i>Kabuli</i>    | <i>Ca_Kabuli_denovo</i>      | 16018177                       | (C/T)       |
| 21594       | CakSNP21594    | <i>Kabuli</i>    | <i>Ca_Kabuli_denovo</i>      | 16019462                       | (G/C)       |
| 21595       | CakSNP21595    | <i>Kabuli</i>    | <i>Ca_Kabuli_denovo</i>      | 16032952                       | (G/C)       |
| 21596       | CakSNP21596    | <i>Kabuli</i>    | <i>Ca_Kabuli_denovo</i>      | 16035104                       | (T/A)       |
| 21597       | CakSNP21597    | <i>Kabuli</i>    | <i>Ca_Kabuli_denovo</i>      | 16035142                       | (T/C)       |
| 21598       | CakSNP21598    | <i>Kabuli</i>    | <i>Ca_Kabuli_denovo</i>      | 16042128                       | (A/C)       |
| 21599       | CakSNP21599    | <i>Kabuli</i>    | <i>Ca_Kabuli_denovo</i>      | 16045168                       | (G/T)       |
| 21600       | CakSNP21600    | <i>Kabuli</i>    | <i>Ca_Kabuli_denovo</i>      | 16046908                       | (A/G)       |
| 21601       | CakSNP21601    | <i>Kabuli</i>    | <i>Ca_Kabuli_denovo</i>      | 16051304                       | (C/T)       |
| 21602       | CakSNP21602    | <i>Kabuli</i>    | <i>Ca_Kabuli_denovo</i>      | 16053222                       | (G/A)       |
| 21603       | CakSNP21603    | <i>Kabuli</i>    | <i>Ca_Kabuli_denovo</i>      | 16059216                       | (G/C)       |
| 21604       | CakSNP21604    | <i>Kabuli</i>    | <i>Ca_Kabuli_denovo</i>      | 16063343                       | (G/A)       |

| <b>S.N.</b> | <b>SNP IDs</b> | <b>Cultivars</b> | <b>Chromosomes/scaffolds</b> | <b>Physical positions (bp)</b> | <b>SNPs</b> |
|-------------|----------------|------------------|------------------------------|--------------------------------|-------------|
| 21605       | CakSNP21605    | <i>Kabuli</i>    | <i>Ca_Kabuli_denovo</i>      | 16063447                       | (T/G)       |
| 21606       | CakSNP21606    | <i>Kabuli</i>    | <i>Ca_Kabuli_denovo</i>      | 16063460                       | (A/C)       |
| 21607       | CakSNP21607    | <i>Kabuli</i>    | <i>Ca_Kabuli_denovo</i>      | 16064860                       | (C/G)       |
| 21608       | CakSNP21608    | <i>Kabuli</i>    | <i>Ca_Kabuli_denovo</i>      | 16072684                       | (A/G)       |
| 21609       | CakSNP21609    | <i>Kabuli</i>    | <i>Ca_Kabuli_denovo</i>      | 16077406                       | (A/C)       |
| 21610       | CakSNP21610    | <i>Kabuli</i>    | <i>Ca_Kabuli_denovo</i>      | 16083241                       | (T/G)       |
| 21611       | CakSNP21611    | <i>Kabuli</i>    | <i>Ca_Kabuli_denovo</i>      | 16088745                       | (T/C)       |
| 21612       | CakSNP21612    | <i>Kabuli</i>    | <i>Ca_Kabuli_denovo</i>      | 16088999                       | (A/C)       |
| 21613       | CakSNP21613    | <i>Kabuli</i>    | <i>Ca_Kabuli_denovo</i>      | 16089001                       | (A/C)       |
| 21614       | CakSNP21614    | <i>Kabuli</i>    | <i>Ca_Kabuli_denovo</i>      | 16091858                       | (T/G)       |
| 21615       | CakSNP21615    | <i>Kabuli</i>    | <i>Ca_Kabuli_denovo</i>      | 16104177                       | (G/A)       |
| 21616       | CakSNP21616    | <i>Kabuli</i>    | <i>Ca_Kabuli_denovo</i>      | 16107450                       | (C/T)       |
| 21617       | CakSNP21617    | <i>Kabuli</i>    | <i>Ca_Kabuli_denovo</i>      | 16107506                       | (G/A)       |
| 21618       | CakSNP21618    | <i>Kabuli</i>    | <i>Ca_Kabuli_denovo</i>      | 16114582                       | (A/G)       |
| 21619       | CakSNP21619    | <i>Kabuli</i>    | <i>Ca_Kabuli_denovo</i>      | 16115155                       | (C/T)       |
| 21620       | CakSNP21620    | <i>Kabuli</i>    | <i>Ca_Kabuli_denovo</i>      | 16115164                       | (C/A)       |
| 21621       | CakSNP21621    | <i>Kabuli</i>    | <i>Ca_Kabuli_denovo</i>      | 16116836                       | (T/G)       |
| 21622       | CakSNP21622    | <i>Kabuli</i>    | <i>Ca_Kabuli_denovo</i>      | 16116890                       | (T/G)       |
| 21623       | CakSNP21623    | <i>Kabuli</i>    | <i>Ca_Kabuli_denovo</i>      | 16118811                       | (T/C)       |
| 21624       | CakSNP21624    | <i>Kabuli</i>    | <i>Ca_Kabuli_denovo</i>      | 16118838                       | (G/A)       |
| 21625       | CakSNP21625    | <i>Kabuli</i>    | <i>Ca_Kabuli_denovo</i>      | 16119632                       | (A/G)       |
| 21626       | CakSNP21626    | <i>Kabuli</i>    | <i>Ca_Kabuli_denovo</i>      | 16134211                       | (G/A)       |
| 21627       | CakSNP21627    | <i>Kabuli</i>    | <i>Ca_Kabuli_denovo</i>      | 16134249                       | (G/A)       |
| 21628       | CakSNP21628    | <i>Kabuli</i>    | <i>Ca_Kabuli_denovo</i>      | 16134580                       | (G/A)       |
| 21629       | CakSNP21629    | <i>Kabuli</i>    | <i>Ca_Kabuli_denovo</i>      | 16143666                       | (A/G)       |
| 21630       | CakSNP21630    | <i>Kabuli</i>    | <i>Ca_Kabuli_denovo</i>      | 16144928                       | (A/G)       |
| 21631       | CakSNP21631    | <i>Kabuli</i>    | <i>Ca_Kabuli_denovo</i>      | 16146300                       | (C/G)       |
| 21632       | CakSNP21632    | <i>Kabuli</i>    | <i>Ca_Kabuli_denovo</i>      | 16152938                       | (G/A)       |
| 21633       | CakSNP21633    | <i>Kabuli</i>    | <i>Ca_Kabuli_denovo</i>      | 16159144                       | (T/C)       |
| 21634       | CakSNP21634    | <i>Kabuli</i>    | <i>Ca_Kabuli_denovo</i>      | 16165826                       | (C/G)       |
| 21635       | CakSNP21635    | <i>Kabuli</i>    | <i>Ca_Kabuli_denovo</i>      | 16165837                       | (G/A)       |
| 21636       | CakSNP21636    | <i>Kabuli</i>    | <i>Ca_Kabuli_denovo</i>      | 16167983                       | (C/T)       |
| 21637       | CakSNP21637    | <i>Kabuli</i>    | <i>Ca_Kabuli_denovo</i>      | 16171075                       | (G/A)       |
| 21638       | CakSNP21638    | <i>Kabuli</i>    | <i>Ca_Kabuli_denovo</i>      | 16173457                       | (T/G)       |
| 21639       | CakSNP21639    | <i>Kabuli</i>    | <i>Ca_Kabuli_denovo</i>      | 16173469                       | (A/G)       |
| 21640       | CakSNP21640    | <i>Kabuli</i>    | <i>Ca_Kabuli_denovo</i>      | 16180337                       | (A/T)       |
| 21641       | CakSNP21641    | <i>Kabuli</i>    | <i>Ca_Kabuli_denovo</i>      | 16180369                       | (G/C)       |
| 21642       | CakSNP21642    | <i>Kabuli</i>    | <i>Ca_Kabuli_denovo</i>      | 16180679                       | (T/C)       |
| 21643       | CakSNP21643    | <i>Kabuli</i>    | <i>Ca_Kabuli_denovo</i>      | 16180694                       | (G/A)       |

| <b>S.N.</b> | <b>SNP IDs</b> | <b>Cultivars</b> | <b>Chromosomes/scaffolds</b> | <b>Physical positions (bp)</b> | <b>SNPs</b> |
|-------------|----------------|------------------|------------------------------|--------------------------------|-------------|
| 21644       | CakSNP21644    | <i>Kabuli</i>    | <i>Ca_Kabuli_denovo</i>      | 16180697                       | (G/A)       |
| 21645       | CakSNP21645    | <i>Kabuli</i>    | <i>Ca_Kabuli_denovo</i>      | 16192364                       | (T/G)       |
| 21646       | CakSNP21646    | <i>Kabuli</i>    | <i>Ca_Kabuli_denovo</i>      | 16195262                       | (A/G)       |
| 21647       | CakSNP21647    | <i>Kabuli</i>    | <i>Ca_Kabuli_denovo</i>      | 16195265                       | (C/A)       |
| 21648       | CakSNP21648    | <i>Kabuli</i>    | <i>Ca_Kabuli_denovo</i>      | 16202129                       | (C/G)       |
| 21649       | CakSNP21649    | <i>Kabuli</i>    | <i>Ca_Kabuli_denovo</i>      | 16202257                       | (G/T)       |
| 21650       | CakSNP21650    | <i>Kabuli</i>    | <i>Ca_Kabuli_denovo</i>      | 16203514                       | (A/G)       |
| 21651       | CakSNP21651    | <i>Kabuli</i>    | <i>Ca_Kabuli_denovo</i>      | 16212822                       | (A/G)       |
| 21652       | CakSNP21652    | <i>Kabuli</i>    | <i>Ca_Kabuli_denovo</i>      | 16212833                       | (G/T)       |
| 21653       | CakSNP21653    | <i>Kabuli</i>    | <i>Ca_Kabuli_denovo</i>      | 16223803                       | (C/T)       |
| 21654       | CakSNP21654    | <i>Kabuli</i>    | <i>Ca_Kabuli_denovo</i>      | 16223835                       | (A/T)       |
| 21655       | CakSNP21655    | <i>Kabuli</i>    | <i>Ca_Kabuli_denovo</i>      | 16226517                       | (T/G)       |
| 21656       | CakSNP21656    | <i>Kabuli</i>    | <i>Ca_Kabuli_denovo</i>      | 16226520                       | (A/C)       |
| 21657       | CakSNP21657    | <i>Kabuli</i>    | <i>Ca_Kabuli_denovo</i>      | 16228102                       | (T/G)       |
| 21658       | CakSNP21658    | <i>Kabuli</i>    | <i>Ca_Kabuli_denovo</i>      | 16231770                       | (C/T)       |
| 21659       | CakSNP21659    | <i>Kabuli</i>    | <i>Ca_Kabuli_denovo</i>      | 16232648                       | (C/A)       |
| 21660       | CakSNP21660    | <i>Kabuli</i>    | <i>Ca_Kabuli_denovo</i>      | 16234566                       | (G/T)       |
| 21661       | CakSNP21661    | <i>Kabuli</i>    | <i>Ca_Kabuli_denovo</i>      | 16234575                       | (G/A)       |
| 21662       | CakSNP21662    | <i>Kabuli</i>    | <i>Ca_Kabuli_denovo</i>      | 16240526                       | (G/A)       |
| 21663       | CakSNP21663    | <i>Kabuli</i>    | <i>Ca_Kabuli_denovo</i>      | 16244719                       | (A/T)       |
| 21664       | CakSNP21664    | <i>Kabuli</i>    | <i>Ca_Kabuli_denovo</i>      | 16247333                       | (G/A)       |
| 21665       | CakSNP21665    | <i>Kabuli</i>    | <i>Ca_Kabuli_denovo</i>      | 16247374                       | (C/T)       |
| 21666       | CakSNP21666    | <i>Kabuli</i>    | <i>Ca_Kabuli_denovo</i>      | 16260126                       | (G/C)       |
| 21667       | CakSNP21667    | <i>Kabuli</i>    | <i>Ca_Kabuli_denovo</i>      | 16260137                       | (A/G)       |
| 21668       | CakSNP21668    | <i>Kabuli</i>    | <i>Ca_Kabuli_denovo</i>      | 16260601                       | (C/T)       |
| 21669       | CakSNP21669    | <i>Kabuli</i>    | <i>Ca_Kabuli_denovo</i>      | 16260619                       | (G/A)       |
| 21670       | CakSNP21670    | <i>Kabuli</i>    | <i>Ca_Kabuli_denovo</i>      | 16262566                       | (G/C)       |
| 21671       | CakSNP21671    | <i>Kabuli</i>    | <i>Ca_Kabuli_denovo</i>      | 16263211                       | (C/T)       |
| 21672       | CakSNP21672    | <i>Kabuli</i>    | <i>Ca_Kabuli_denovo</i>      | 16263606                       | (A/T)       |
| 21673       | CakSNP21673    | <i>Kabuli</i>    | <i>Ca_Kabuli_denovo</i>      | 16263609                       | (T/C)       |
| 21674       | CakSNP21674    | <i>Kabuli</i>    | <i>Ca_Kabuli_denovo</i>      | 16265172                       | (C/G)       |
| 21675       | CakSNP21675    | <i>Kabuli</i>    | <i>Ca_Kabuli_denovo</i>      | 16266042                       | (T/G)       |
| 21676       | CakSNP21676    | <i>Kabuli</i>    | <i>Ca_Kabuli_denovo</i>      | 16280261                       | (C/A)       |
| 21677       | CakSNP21677    | <i>Kabuli</i>    | <i>Ca_Kabuli_denovo</i>      | 16280269                       | (C/T)       |
| 21678       | CakSNP21678    | <i>Kabuli</i>    | <i>Ca_Kabuli_denovo</i>      | 16285150                       | (C/T)       |
| 21679       | CakSNP21679    | <i>Kabuli</i>    | <i>Ca_Kabuli_denovo</i>      | 16285196                       | (C/T)       |
| 21680       | CakSNP21680    | <i>Kabuli</i>    | <i>Ca_Kabuli_denovo</i>      | 16285228                       | (G/C)       |
| 21681       | CakSNP21681    | <i>Kabuli</i>    | <i>Ca_Kabuli_denovo</i>      | 16287350                       | (G/C)       |
| 21682       | CakSNP21682    | <i>Kabuli</i>    | <i>Ca_Kabuli_denovo</i>      | 16287361                       | (C/T)       |

| <b>S.N.</b> | <b>SNP IDs</b> | <b>Cultivars</b> | <b>Chromosomes/scaffolds</b> | <b>Physical positions (bp)</b> | <b>SNPs</b> |
|-------------|----------------|------------------|------------------------------|--------------------------------|-------------|
| 21683       | CakSNP21683    | <i>Kabuli</i>    | <i>Ca_Kabuli_denovo</i>      | 16293927                       | (C/T)       |
| 21684       | CakSNP21684    | <i>Kabuli</i>    | <i>Ca_Kabuli_denovo</i>      | 16304638                       | (C/G)       |
| 21685       | CakSNP21685    | <i>Kabuli</i>    | <i>Ca_Kabuli_denovo</i>      | 16304644                       | (G/A)       |
| 21686       | CakSNP21686    | <i>Kabuli</i>    | <i>Ca_Kabuli_denovo</i>      | 16309405                       | (C/T)       |
| 21687       | CakSNP21687    | <i>Kabuli</i>    | <i>Ca_Kabuli_denovo</i>      | 16310098                       | (A/C)       |
| 21688       | CakSNP21688    | <i>Kabuli</i>    | <i>Ca_Kabuli_denovo</i>      | 16311865                       | (A/G)       |
| 21689       | CakSNP21689    | <i>Kabuli</i>    | <i>Ca_Kabuli_denovo</i>      | 16318334                       | (A/C)       |
| 21690       | CakSNP21690    | <i>Kabuli</i>    | <i>Ca_Kabuli_denovo</i>      | 16321322                       | (G/A)       |
| 21691       | CakSNP21691    | <i>Kabuli</i>    | <i>Ca_Kabuli_denovo</i>      | 16321357                       | (G/T)       |
| 21692       | CakSNP21692    | <i>Kabuli</i>    | <i>Ca_Kabuli_denovo</i>      | 16323646                       | (C/T)       |
| 21693       | CakSNP21693    | <i>Kabuli</i>    | <i>Ca_Kabuli_denovo</i>      | 16323653                       | (G/A)       |
| 21694       | CakSNP21694    | <i>Kabuli</i>    | <i>Ca_Kabuli_denovo</i>      | 16324174                       | (T/C)       |
| 21695       | CakSNP21695    | <i>Kabuli</i>    | <i>Ca_Kabuli_denovo</i>      | 16324198                       | (G/C)       |
| 21696       | CakSNP21696    | <i>Kabuli</i>    | <i>Ca_Kabuli_denovo</i>      | 16326296                       | (A/G)       |
| 21697       | CakSNP21697    | <i>Kabuli</i>    | <i>Ca_Kabuli_denovo</i>      | 16326326                       | (T/C)       |
| 21698       | CakSNP21698    | <i>Kabuli</i>    | <i>Ca_Kabuli_denovo</i>      | 16327612                       | (G/T)       |
| 21699       | CakSNP21699    | <i>Kabuli</i>    | <i>Ca_Kabuli_denovo</i>      | 16329733                       | (T/G)       |
| 21700       | CakSNP21700    | <i>Kabuli</i>    | <i>Ca_Kabuli_denovo</i>      | 16329739                       | (T/C)       |
| 21701       | CakSNP21701    | <i>Kabuli</i>    | <i>Ca_Kabuli_denovo</i>      | 16331645                       | (T/C)       |
| 21702       | CakSNP21702    | <i>Kabuli</i>    | <i>Ca_Kabuli_denovo</i>      | 16332497                       | (A/G)       |
| 21703       | CakSNP21703    | <i>Kabuli</i>    | <i>Ca_Kabuli_denovo</i>      | 16335146                       | (A/G)       |
| 21704       | CakSNP21704    | <i>Kabuli</i>    | <i>Ca_Kabuli_denovo</i>      | 16337697                       | (A/C)       |
| 21705       | CakSNP21705    | <i>Kabuli</i>    | <i>Ca_Kabuli_denovo</i>      | 16338451                       | (T/C)       |
| 21706       | CakSNP21706    | <i>Kabuli</i>    | <i>Ca_Kabuli_denovo</i>      | 16338474                       | (T/G)       |
| 21707       | CakSNP21707    | <i>Kabuli</i>    | <i>Ca_Kabuli_denovo</i>      | 16345856                       | (C/G)       |
| 21708       | CakSNP21708    | <i>Kabuli</i>    | <i>Ca_Kabuli_denovo</i>      | 16360422                       | (C/T)       |
| 21709       | CakSNP21709    | <i>Kabuli</i>    | <i>Ca_Kabuli_denovo</i>      | 16366147                       | (A/C)       |
| 21710       | CakSNP21710    | <i>Kabuli</i>    | <i>Ca_Kabuli_denovo</i>      | 16366177                       | (T/C)       |
| 21711       | CakSNP21711    | <i>Kabuli</i>    | <i>Ca_Kabuli_denovo</i>      | 16374055                       | (C/T)       |
| 21712       | CakSNP21712    | <i>Kabuli</i>    | <i>Ca_Kabuli_denovo</i>      | 16374136                       | (C/A)       |
| 21713       | CakSNP21713    | <i>Kabuli</i>    | <i>Ca_Kabuli_denovo</i>      | 16379800                       | (G/A)       |
| 21714       | CakSNP21714    | <i>Kabuli</i>    | <i>Ca_Kabuli_denovo</i>      | 16380555                       | (A/G)       |
| 21715       | CakSNP21715    | <i>Kabuli</i>    | <i>Ca_Kabuli_denovo</i>      | 16382611                       | (C/T)       |
| 21716       | CakSNP21716    | <i>Kabuli</i>    | <i>Ca_Kabuli_denovo</i>      | 16386909                       | (T/G)       |
| 21717       | CakSNP21717    | <i>Kabuli</i>    | <i>Ca_Kabuli_denovo</i>      | 16386939                       | (A/G)       |
| 21718       | CakSNP21718    | <i>Kabuli</i>    | <i>Ca_Kabuli_denovo</i>      | 16395993                       | (A/C)       |
| 21719       | CakSNP21719    | <i>Kabuli</i>    | <i>Ca_Kabuli_denovo</i>      | 16395994                       | (G/A)       |
| 21720       | CakSNP21720    | <i>Kabuli</i>    | <i>Ca_Kabuli_denovo</i>      | 16396510                       | (A/G)       |
| 21721       | CakSNP21721    | <i>Kabuli</i>    | <i>Ca_Kabuli_denovo</i>      | 16396541                       | (A/G)       |

| <b>S.N.</b> | <b>SNP IDs</b> | <b>Cultivars</b> | <b>Chromosomes/scaffolds</b> | <b>Physical positions (bp)</b> | <b>SNPs</b> |
|-------------|----------------|------------------|------------------------------|--------------------------------|-------------|
| 21722       | CakSNP21722    | <i>Kabuli</i>    | <i>Ca_Kabuli_denovo</i>      | 16399727                       | (C/G)       |
| 21723       | CakSNP21723    | <i>Kabuli</i>    | <i>Ca_Kabuli_denovo</i>      | 16400456                       | (A/C)       |
| 21724       | CakSNP21724    | <i>Kabuli</i>    | <i>Ca_Kabuli_denovo</i>      | 16400458                       | (A/G)       |
| 21725       | CakSNP21725    | <i>Kabuli</i>    | <i>Ca_Kabuli_denovo</i>      | 16403710                       | (T/G)       |
| 21726       | CakSNP21726    | <i>Kabuli</i>    | <i>Ca_Kabuli_denovo</i>      | 16407355                       | (T/G)       |
| 21727       | CakSNP21727    | <i>Kabuli</i>    | <i>Ca_Kabuli_denovo</i>      | 16407358                       | (G/C)       |
| 21728       | CakSNP21728    | <i>Kabuli</i>    | <i>Ca_Kabuli_denovo</i>      | 16408072                       | (T/C)       |
| 21729       | CakSNP21729    | <i>Kabuli</i>    | <i>Ca_Kabuli_denovo</i>      | 16419017                       | (G/T)       |
| 21730       | CakSNP21730    | <i>Kabuli</i>    | <i>Ca_Kabuli_denovo</i>      | 16419044                       | (T/C)       |
| 21731       | CakSNP21731    | <i>Kabuli</i>    | <i>Ca_Kabuli_denovo</i>      | 16422703                       | (G/C)       |
| 21732       | CakSNP21732    | <i>Kabuli</i>    | <i>Ca_Kabuli_denovo</i>      | 16423796                       | (C/G)       |
| 21733       | CakSNP21733    | <i>Kabuli</i>    | <i>Ca_Kabuli_denovo</i>      | 16431153                       | (A/G)       |
| 21734       | CakSNP21734    | <i>Kabuli</i>    | <i>Ca_Kabuli_denovo</i>      | 16431161                       | (G/A)       |
| 21735       | CakSNP21735    | <i>Kabuli</i>    | <i>Ca_Kabuli_denovo</i>      | 16432329                       | (A/G)       |
| 21736       | CakSNP21736    | <i>Kabuli</i>    | <i>Ca_Kabuli_denovo</i>      | 16433327                       | (G/A)       |
| 21737       | CakSNP21737    | <i>Kabuli</i>    | <i>Ca_Kabuli_denovo</i>      | 16433379                       | (A/G)       |
| 21738       | CakSNP21738    | <i>Kabuli</i>    | <i>Ca_Kabuli_denovo</i>      | 16433532                       | (T/C)       |
| 21739       | CakSNP21739    | <i>Kabuli</i>    | <i>Ca_Kabuli_denovo</i>      | 16433951                       | (A/G)       |
| 21740       | CakSNP21740    | <i>Kabuli</i>    | <i>Ca_Kabuli_denovo</i>      | 16433958                       | (T/C)       |
| 21741       | CakSNP21741    | <i>Kabuli</i>    | <i>Ca_Kabuli_denovo</i>      | 16433964                       | (T/C)       |
| 21742       | CakSNP21742    | <i>Kabuli</i>    | <i>Ca_Kabuli_denovo</i>      | 16438515                       | (G/C)       |
| 21743       | CakSNP21743    | <i>Kabuli</i>    | <i>Ca_Kabuli_denovo</i>      | 16438572                       | (G/T)       |
| 21744       | CakSNP21744    | <i>Kabuli</i>    | <i>Ca_Kabuli_denovo</i>      | 16439398                       | (G/C)       |
| 21745       | CakSNP21745    | <i>Kabuli</i>    | <i>Ca_Kabuli_denovo</i>      | 16439416                       | (T/C)       |
| 21746       | CakSNP21746    | <i>Kabuli</i>    | <i>Ca_Kabuli_denovo</i>      | 16442634                       | (G/A)       |
| 21747       | CakSNP21747    | <i>Kabuli</i>    | <i>Ca_Kabuli_denovo</i>      | 16442868                       | (A/T)       |
| 21748       | CakSNP21748    | <i>Kabuli</i>    | <i>Ca_Kabuli_denovo</i>      | 16443463                       | (G/A)       |
| 21749       | CakSNP21749    | <i>Kabuli</i>    | <i>Ca_Kabuli_denovo</i>      | 16443487                       | (C/T)       |
| 21750       | CakSNP21750    | <i>Kabuli</i>    | <i>Ca_Kabuli_denovo</i>      | 16446001                       | (T/C)       |
| 21751       | CakSNP21751    | <i>Kabuli</i>    | <i>Ca_Kabuli_denovo</i>      | 16446028                       | (A/T)       |
| 21752       | CakSNP21752    | <i>Kabuli</i>    | <i>Ca_Kabuli_denovo</i>      | 16446612                       | (C/G)       |
| 21753       | CakSNP21753    | <i>Kabuli</i>    | <i>Ca_Kabuli_denovo</i>      | 16446660                       | (C/T)       |
| 21754       | CakSNP21754    | <i>Kabuli</i>    | <i>Ca_Kabuli_denovo</i>      | 16448652                       | (C/T)       |
| 21755       | CakSNP21755    | <i>Kabuli</i>    | <i>Ca_Kabuli_denovo</i>      | 16448673                       | (C/T)       |
| 21756       | CakSNP21756    | <i>Kabuli</i>    | <i>Ca_Kabuli_denovo</i>      | 16450928                       | (C/T)       |
| 21757       | CakSNP21757    | <i>Kabuli</i>    | <i>Ca_Kabuli_denovo</i>      | 16450936                       | (G/C)       |
| 21758       | CakSNP21758    | <i>Kabuli</i>    | <i>Ca_Kabuli_denovo</i>      | 16454737                       | (A/G)       |
| 21759       | CakSNP21759    | <i>Kabuli</i>    | <i>Ca_Kabuli_denovo</i>      | 16454742                       | (C/T)       |
| 21760       | CakSNP21760    | <i>Kabuli</i>    | <i>Ca_Kabuli_denovo</i>      | 16463528                       | (C/G)       |

| <b>S.N.</b> | <b>SNP IDs</b> | <b>Cultivars</b> | <b>Chromosomes/scaffolds</b> | <b>Physical positions (bp)</b> | <b>SNPs</b> |
|-------------|----------------|------------------|------------------------------|--------------------------------|-------------|
| 21761       | CakSNP21761    | <i>Kabuli</i>    | <i>Ca_Kabuli_denovo</i>      | 16463533                       | (A/C)       |
| 21762       | CakSNP21762    | <i>Kabuli</i>    | <i>Ca_Kabuli_denovo</i>      | 16466561                       | (G/C)       |
| 21763       | CakSNP21763    | <i>Kabuli</i>    | <i>Ca_Kabuli_denovo</i>      | 16478129                       | (C/T)       |
| 21764       | CakSNP21764    | <i>Kabuli</i>    | <i>Ca_Kabuli_denovo</i>      | 16480207                       | (G/A)       |
| 21765       | CakSNP21765    | <i>Kabuli</i>    | <i>Ca_Kabuli_denovo</i>      | 16481213                       | (T/C)       |
| 21766       | CakSNP21766    | <i>Kabuli</i>    | <i>Ca_Kabuli_denovo</i>      | 16481216                       | (C/G)       |
| 21767       | CakSNP21767    | <i>Kabuli</i>    | <i>Ca_Kabuli_denovo</i>      | 16488089                       | (C/G)       |
| 21768       | CakSNP21768    | <i>Kabuli</i>    | <i>Ca_Kabuli_denovo</i>      | 16491339                       | (G/A)       |
| 21769       | CakSNP21769    | <i>Kabuli</i>    | <i>Ca_Kabuli_denovo</i>      | 16493110                       | (C/G)       |
| 21770       | CakSNP21770    | <i>Kabuli</i>    | <i>Ca_Kabuli_denovo</i>      | 16493176                       | (T/C)       |
| 21771       | CakSNP21771    | <i>Kabuli</i>    | <i>Ca_Kabuli_denovo</i>      | 16493859                       | (C/T)       |
| 21772       | CakSNP21772    | <i>Kabuli</i>    | <i>Ca_Kabuli_denovo</i>      | 16493864                       | (G/A)       |
| 21773       | CakSNP21773    | <i>Kabuli</i>    | <i>Ca_Kabuli_denovo</i>      | 16495795                       | (T/G)       |
| 21774       | CakSNP21774    | <i>Kabuli</i>    | <i>Ca_Kabuli_denovo</i>      | 16495801                       | (A/G)       |
| 21775       | CakSNP21775    | <i>Kabuli</i>    | <i>Ca_Kabuli_denovo</i>      | 16499520                       | (A/G)       |
| 21776       | CakSNP21776    | <i>Kabuli</i>    | <i>Ca_Kabuli_denovo</i>      | 16499555                       | (C/A)       |
| 21777       | CakSNP21777    | <i>Kabuli</i>    | <i>Ca_Kabuli_denovo</i>      | 16500677                       | (A/G)       |
| 21778       | CakSNP21778    | <i>Kabuli</i>    | <i>Ca_Kabuli_denovo</i>      | 16500683                       | (A/G)       |
| 21779       | CakSNP21779    | <i>Kabuli</i>    | <i>Ca_Kabuli_denovo</i>      | 16501449                       | (T/G)       |
| 21780       | CakSNP21780    | <i>Kabuli</i>    | <i>Ca_Kabuli_denovo</i>      | 16503695                       | (G/C)       |
| 21781       | CakSNP21781    | <i>Kabuli</i>    | <i>Ca_Kabuli_denovo</i>      | 16506410                       | (C/G)       |
| 21782       | CakSNP21782    | <i>Kabuli</i>    | <i>Ca_Kabuli_denovo</i>      | 16506452                       | (C/T)       |
| 21783       | CakSNP21783    | <i>Kabuli</i>    | <i>Ca_Kabuli_denovo</i>      | 16506584                       | (C/G)       |
| 21784       | CakSNP21784    | <i>Kabuli</i>    | <i>Ca_Kabuli_denovo</i>      | 16506595                       | (A/C)       |
| 21785       | CakSNP21785    | <i>Kabuli</i>    | <i>Ca_Kabuli_denovo</i>      | 16506801                       | (C/T)       |
| 21786       | CakSNP21786    | <i>Kabuli</i>    | <i>Ca_Kabuli_denovo</i>      | 16506848                       | (T/G)       |
| 21787       | CakSNP21787    | <i>Kabuli</i>    | <i>Ca_Kabuli_denovo</i>      | 16507564                       | (T/G)       |
| 21788       | CakSNP21788    | <i>Kabuli</i>    | <i>Ca_Kabuli_denovo</i>      | 16507589                       | (T/G)       |
| 21789       | CakSNP21789    | <i>Kabuli</i>    | <i>Ca_Kabuli_denovo</i>      | 16511992                       | (G/A)       |
| 21790       | CakSNP21790    | <i>Kabuli</i>    | <i>Ca_Kabuli_denovo</i>      | 16516079                       | (T/C)       |
| 21791       | CakSNP21791    | <i>Kabuli</i>    | <i>Ca_Kabuli_denovo</i>      | 16518646                       | (A/G)       |
| 21792       | CakSNP21792    | <i>Kabuli</i>    | <i>Ca_Kabuli_denovo</i>      | 16521054                       | (G/C)       |
| 21793       | CakSNP21793    | <i>Kabuli</i>    | <i>Ca_Kabuli_denovo</i>      | 16523681                       | (A/G)       |
| 21794       | CakSNP21794    | <i>Kabuli</i>    | <i>Ca_Kabuli_denovo</i>      | 16527540                       | (A/G)       |
| 21795       | CakSNP21795    | <i>Kabuli</i>    | <i>Ca_Kabuli_denovo</i>      | 16527703                       | (T/C)       |
| 21796       | CakSNP21796    | <i>Kabuli</i>    | <i>Ca_Kabuli_denovo</i>      | 16527716                       | (G/A)       |
| 21797       | CakSNP21797    | <i>Kabuli</i>    | <i>Ca_Kabuli_denovo</i>      | 16531688                       | (G/C)       |
| 21798       | CakSNP21798    | <i>Kabuli</i>    | <i>Ca_Kabuli_denovo</i>      | 16531733                       | (G/C)       |
| 21799       | CakSNP21799    | <i>Kabuli</i>    | <i>Ca_Kabuli_denovo</i>      | 16535101                       | (C/A)       |



| <b>S.N.</b> | <b>SNP IDs</b> | <b>Cultivars</b> | <b>Chromosomes/scaffolds</b> | <b>Physical positions (bp)</b> | <b>SNPs</b> |
|-------------|----------------|------------------|------------------------------|--------------------------------|-------------|
| 21800       | CakSNP21800    | <i>Kabuli</i>    | <i>Ca_Kabuli_denovo</i>      | 16537066                       | (C/A)       |
| 21801       | CakSNP21801    | <i>Kabuli</i>    | <i>Ca_Kabuli_denovo</i>      | 16538701                       | (C/T)       |
| 21802       | CakSNP21802    | <i>Kabuli</i>    | <i>Ca_Kabuli_denovo</i>      | 16538725                       | (G/T)       |
| 21803       | CakSNP21803    | <i>Kabuli</i>    | <i>Ca_Kabuli_denovo</i>      | 16540897                       | (G/T)       |
| 21804       | CakSNP21804    | <i>Kabuli</i>    | <i>Ca_Kabuli_denovo</i>      | 16540932                       | (T/C)       |
| 21805       | CakSNP21805    | <i>Kabuli</i>    | <i>Ca_Kabuli_denovo</i>      | 16541788                       | (T/C)       |
| 21806       | CakSNP21806    | <i>Kabuli</i>    | <i>Ca_Kabuli_denovo</i>      | 16541815                       | (C/G)       |
| 21807       | CakSNP21807    | <i>Kabuli</i>    | <i>Ca_Kabuli_denovo</i>      | 16541818                       | (C/T)       |
| 21808       | CakSNP21808    | <i>Kabuli</i>    | <i>Ca_Kabuli_denovo</i>      | 16542667                       | (T/C)       |
| 21809       | CakSNP21809    | <i>Kabuli</i>    | <i>Ca_Kabuli_denovo</i>      | 16543444                       | (T/C)       |
| 21810       | CakSNP21810    | <i>Kabuli</i>    | <i>Ca_Kabuli_denovo</i>      | 16548536                       | (G/A)       |
| 21811       | CakSNP21811    | <i>Kabuli</i>    | <i>Ca_Kabuli_denovo</i>      | 16548706                       | (T/G)       |
| 21812       | CakSNP21812    | <i>Kabuli</i>    | <i>Ca_Kabuli_denovo</i>      | 16548709                       | (C/T)       |
| 21813       | CakSNP21813    | <i>Kabuli</i>    | <i>Ca_Kabuli_denovo</i>      | 16550594                       | (A/G)       |
| 21814       | CakSNP21814    | <i>Kabuli</i>    | <i>Ca_Kabuli_denovo</i>      | 16550597                       | (G/C)       |
| 21815       | CakSNP21815    | <i>Kabuli</i>    | <i>Ca_Kabuli_denovo</i>      | 16550753                       | (T/G)       |
| 21816       | CakSNP21816    | <i>Kabuli</i>    | <i>Ca_Kabuli_denovo</i>      | 16551596                       | (T/C)       |
| 21817       | CakSNP21817    | <i>Kabuli</i>    | <i>Ca_Kabuli_denovo</i>      | 16551608                       | (C/T)       |
| 21818       | CakSNP21818    | <i>Kabuli</i>    | <i>Ca_Kabuli_denovo</i>      | 16551984                       | (C/G)       |
| 21819       | CakSNP21819    | <i>Kabuli</i>    | <i>Ca_Kabuli_denovo</i>      | 16552001                       | (C/G)       |
| 21820       | CakSNP21820    | <i>Kabuli</i>    | <i>Ca_Kabuli_denovo</i>      | 16555320                       | (A/G)       |
| 21821       | CakSNP21821    | <i>Kabuli</i>    | <i>Ca_Kabuli_denovo</i>      | 16555331                       | (A/G)       |
| 21822       | CakSNP21822    | <i>Kabuli</i>    | <i>Ca_Kabuli_denovo</i>      | 16555347                       | (C/T)       |
| 21823       | CakSNP21823    | <i>Kabuli</i>    | <i>Ca_Kabuli_denovo</i>      | 16563232                       | (C/G)       |
| 21824       | CakSNP21824    | <i>Kabuli</i>    | <i>Ca_Kabuli_denovo</i>      | 16568993                       | (G/T)       |
| 21825       | CakSNP21825    | <i>Kabuli</i>    | <i>Ca_Kabuli_denovo</i>      | 16568994                       | (T/C)       |
| 21826       | CakSNP21826    | <i>Kabuli</i>    | <i>Ca_Kabuli_denovo</i>      | 16573820                       | (G/C)       |
| 21827       | CakSNP21827    | <i>Kabuli</i>    | <i>Ca_Kabuli_denovo</i>      | 16573891                       | (C/T)       |
| 21828       | CakSNP21828    | <i>Kabuli</i>    | <i>Ca_Kabuli_denovo</i>      | 16573900                       | (C/G)       |
| 21829       | CakSNP21829    | <i>Kabuli</i>    | <i>Ca_Kabuli_denovo</i>      | 16573903                       | (C/T)       |
| 21830       | CakSNP21830    | <i>Kabuli</i>    | <i>Ca_Kabuli_denovo</i>      | 16575551                       | (A/G)       |
| 21831       | CakSNP21831    | <i>Kabuli</i>    | <i>Ca_Kabuli_denovo</i>      | 16577951                       | (G/A)       |
| 21832       | CakSNP21832    | <i>Kabuli</i>    | <i>Ca_Kabuli_denovo</i>      | 16577959                       | (G/T)       |
| 21833       | CakSNP21833    | <i>Kabuli</i>    | <i>Ca_Kabuli_denovo</i>      | 16578568                       | (C/T)       |
| 21834       | CakSNP21834    | <i>Kabuli</i>    | <i>Ca_Kabuli_denovo</i>      | 16585761                       | (C/T)       |
| 21835       | CakSNP21835    | <i>Kabuli</i>    | <i>Ca_Kabuli_denovo</i>      | 16589452                       | (G/A)       |
| 21836       | CakSNP21836    | <i>Kabuli</i>    | <i>Ca_Kabuli_denovo</i>      | 16590210                       | (G/C)       |
| 21837       | CakSNP21837    | <i>Kabuli</i>    | <i>Ca_Kabuli_denovo</i>      | 16590229                       | (C/G)       |
| 21838       | CakSNP21838    | <i>Kabuli</i>    | <i>Ca_Kabuli_denovo</i>      | 16611748                       | (C/T)       |

| <b>S.N.</b> | <b>SNP IDs</b> | <b>Cultivars</b> | <b>Chromosomes/scaffolds</b> | <b>Physical positions (bp)</b> | <b>SNPs</b> |
|-------------|----------------|------------------|------------------------------|--------------------------------|-------------|
| 21839       | CakSNP21839    | <i>Kabuli</i>    | <i>Ca_Kabuli_denovo</i>      | 16613548                       | (A/G)       |
| 21840       | CakSNP21840    | <i>Kabuli</i>    | <i>Ca_Kabuli_denovo</i>      | 16616090                       | (G/A)       |
| 21841       | CakSNP21841    | <i>Kabuli</i>    | <i>Ca_Kabuli_denovo</i>      | 16616105                       | (A/G)       |
| 21842       | CakSNP21842    | <i>Kabuli</i>    | <i>Ca_Kabuli_denovo</i>      | 16616806                       | (C/A)       |
| 21843       | CakSNP21843    | <i>Kabuli</i>    | <i>Ca_Kabuli_denovo</i>      | 16619801                       | (C/A)       |
| 21844       | CakSNP21844    | <i>Kabuli</i>    | <i>Ca_Kabuli_denovo</i>      | 16623076                       | (A/G)       |
| 21845       | CakSNP21845    | <i>Kabuli</i>    | <i>Ca_Kabuli_denovo</i>      | 16626028                       | (C/A)       |
| 21846       | CakSNP21846    | <i>Kabuli</i>    | <i>Ca_Kabuli_denovo</i>      | 16626043                       | (A/G)       |
| 21847       | CakSNP21847    | <i>Kabuli</i>    | <i>Ca_Kabuli_denovo</i>      | 16629782                       | (C/T)       |
| 21848       | CakSNP21848    | <i>Kabuli</i>    | <i>Ca_Kabuli_denovo</i>      | 16643323                       | (A/G)       |
| 21849       | CakSNP21849    | <i>Kabuli</i>    | <i>Ca_Kabuli_denovo</i>      | 16648155                       | (A/G)       |
| 21850       | CakSNP21850    | <i>Kabuli</i>    | <i>Ca_Kabuli_denovo</i>      | 16653157                       | (T/C)       |
| 21851       | CakSNP21851    | <i>Kabuli</i>    | <i>Ca_Kabuli_denovo</i>      | 16665169                       | (T/C)       |
| 21852       | CakSNP21852    | <i>Kabuli</i>    | <i>Ca_Kabuli_denovo</i>      | 16669271                       | (T/G)       |
| 21853       | CakSNP21853    | <i>Kabuli</i>    | <i>Ca_Kabuli_denovo</i>      | 16669353                       | (G/C)       |
| 21854       | CakSNP21854    | <i>Kabuli</i>    | <i>Ca_Kabuli_denovo</i>      | 16669354                       | (G/C)       |
| 21855       | CakSNP21855    | <i>Kabuli</i>    | <i>Ca_Kabuli_denovo</i>      | 16672658                       | (C/G)       |
| 21856       | CakSNP21856    | <i>Kabuli</i>    | <i>Ca_Kabuli_denovo</i>      | 16673523                       | (C/T)       |
| 21857       | CakSNP21857    | <i>Kabuli</i>    | <i>Ca_Kabuli_denovo</i>      | 16673532                       | (T/A)       |
| 21858       | CakSNP21858    | <i>Kabuli</i>    | <i>Ca_Kabuli_denovo</i>      | 16673632                       | (C/A)       |
| 21859       | CakSNP21859    | <i>Kabuli</i>    | <i>Ca_Kabuli_denovo</i>      | 16678096                       | (A/G)       |
| 21860       | CakSNP21860    | <i>Kabuli</i>    | <i>Ca_Kabuli_denovo</i>      | 16678143                       | (G/T)       |
| 21861       | CakSNP21861    | <i>Kabuli</i>    | <i>Ca_Kabuli_denovo</i>      | 16691722                       | (T/A)       |
| 21862       | CakSNP21862    | <i>Kabuli</i>    | <i>Ca_Kabuli_denovo</i>      | 16700868                       | (G/C)       |
| 21863       | CakSNP21863    | <i>Kabuli</i>    | <i>Ca_Kabuli_denovo</i>      | 16706187                       | (G/C)       |
| 21864       | CakSNP21864    | <i>Kabuli</i>    | <i>Ca_Kabuli_denovo</i>      | 16706241                       | (G/A)       |
| 21865       | CakSNP21865    | <i>Kabuli</i>    | <i>Ca_Kabuli_denovo</i>      | 16707329                       | (G/A)       |
| 21866       | CakSNP21866    | <i>Kabuli</i>    | <i>Ca_Kabuli_denovo</i>      | 16707356                       | (A/C)       |
| 21867       | CakSNP21867    | <i>Kabuli</i>    | <i>Ca_Kabuli_denovo</i>      | 16708337                       | (A/G)       |
| 21868       | CakSNP21868    | <i>Kabuli</i>    | <i>Ca_Kabuli_denovo</i>      | 16715210                       | (A/G)       |
| 21869       | CakSNP21869    | <i>Kabuli</i>    | <i>Ca_Kabuli_denovo</i>      | 16715216                       | (A/C)       |
| 21870       | CakSNP21870    | <i>Kabuli</i>    | <i>Ca_Kabuli_denovo</i>      | 16720077                       | (T/G)       |
| 21871       | CakSNP21871    | <i>Kabuli</i>    | <i>Ca_Kabuli_denovo</i>      | 16720096                       | (C/A)       |
| 21872       | CakSNP21872    | <i>Kabuli</i>    | <i>Ca_Kabuli_denovo</i>      | 16723012                       | (G/A)       |
| 21873       | CakSNP21873    | <i>Kabuli</i>    | <i>Ca_Kabuli_denovo</i>      | 16724754                       | (A/G)       |
| 21874       | CakSNP21874    | <i>Kabuli</i>    | <i>Ca_Kabuli_denovo</i>      | 16724832                       | (T/C)       |
| 21875       | CakSNP21875    | <i>Kabuli</i>    | <i>Ca_Kabuli_denovo</i>      | 16725436                       | (T/C)       |
| 21876       | CakSNP21876    | <i>Kabuli</i>    | <i>Ca_Kabuli_denovo</i>      | 16728254                       | (A/C)       |
| 21877       | CakSNP21877    | <i>Kabuli</i>    | <i>Ca_Kabuli_denovo</i>      | 16734735                       | (A/G)       |

| <b>S.N.</b> | <b>SNP IDs</b> | <b>Cultivars</b> | <b>Chromosomes/scaffolds</b> | <b>Physical positions (bp)</b> | <b>SNPs</b> |
|-------------|----------------|------------------|------------------------------|--------------------------------|-------------|
| 21878       | CakSNP21878    | <i>Kabuli</i>    | <i>Ca_Kabuli_denovo</i>      | 16738628                       | (C/T)       |
| 21879       | CakSNP21879    | <i>Kabuli</i>    | <i>Ca_Kabuli_denovo</i>      | 16741741                       | (T/C)       |
| 21880       | CakSNP21880    | <i>Kabuli</i>    | <i>Ca_Kabuli_denovo</i>      | 16745312                       | (T/G)       |
| 21881       | CakSNP21881    | <i>Kabuli</i>    | <i>Ca_Kabuli_denovo</i>      | 16745357                       | (C/T)       |
| 21882       | CakSNP21882    | <i>Kabuli</i>    | <i>Ca_Kabuli_denovo</i>      | 16749543                       | (C/T)       |
| 21883       | CakSNP21883    | <i>Kabuli</i>    | <i>Ca_Kabuli_denovo</i>      | 16753524                       | (T/C)       |
| 21884       | CakSNP21884    | <i>Kabuli</i>    | <i>Ca_Kabuli_denovo</i>      | 16756754                       | (T/G)       |
| 21885       | CakSNP21885    | <i>Kabuli</i>    | <i>Ca_Kabuli_denovo</i>      | 16756778                       | (C/G)       |
| 21886       | CakSNP21886    | <i>Kabuli</i>    | <i>Ca_Kabuli_denovo</i>      | 16759066                       | (A/C)       |
| 21887       | CakSNP21887    | <i>Kabuli</i>    | <i>Ca_Kabuli_denovo</i>      | 16763119                       | (G/C)       |
| 21888       | CakSNP21888    | <i>Kabuli</i>    | <i>Ca_Kabuli_denovo</i>      | 16768916                       | (C/T)       |
| 21889       | CakSNP21889    | <i>Kabuli</i>    | <i>Ca_Kabuli_denovo</i>      | 16770864                       | (C/T)       |
| 21890       | CakSNP21890    | <i>Kabuli</i>    | <i>Ca_Kabuli_denovo</i>      | 16773167                       | (G/A)       |
| 21891       | CakSNP21891    | <i>Kabuli</i>    | <i>Ca_Kabuli_denovo</i>      | 16773169                       | (T/C)       |
| 21892       | CakSNP21892    | <i>Kabuli</i>    | <i>Ca_Kabuli_denovo</i>      | 16775909                       | (G/C)       |
| 21893       | CakSNP21893    | <i>Kabuli</i>    | <i>Ca_Kabuli_denovo</i>      | 16792384                       | (G/T)       |
| 21894       | CakSNP21894    | <i>Kabuli</i>    | <i>Ca_Kabuli_denovo</i>      | 16792385                       | (T/C)       |
| 21895       | CakSNP21895    | <i>Kabuli</i>    | <i>Ca_Kabuli_denovo</i>      | 16795334                       | (A/C)       |
| 21896       | CakSNP21896    | <i>Kabuli</i>    | <i>Ca_Kabuli_denovo</i>      | 16796009                       | (G/C)       |
| 21897       | CakSNP21897    | <i>Kabuli</i>    | <i>Ca_Kabuli_denovo</i>      | 16797381                       | (A/C)       |
| 21898       | CakSNP21898    | <i>Kabuli</i>    | <i>Ca_Kabuli_denovo</i>      | 16798070                       | (T/G)       |
| 21899       | CakSNP21899    | <i>Kabuli</i>    | <i>Ca_Kabuli_denovo</i>      | 16800967                       | (G/C)       |
| 21900       | CakSNP21900    | <i>Kabuli</i>    | <i>Ca_Kabuli_denovo</i>      | 16800982                       | (G/A)       |
| 21901       | CakSNP21901    | <i>Kabuli</i>    | <i>Ca_Kabuli_denovo</i>      | 16805285                       | (A/C)       |
| 21902       | CakSNP21902    | <i>Kabuli</i>    | <i>Ca_Kabuli_denovo</i>      | 16806851                       | (A/G)       |
| 21903       | CakSNP21903    | <i>Kabuli</i>    | <i>Ca_Kabuli_denovo</i>      | 16810319                       | (C/G)       |
| 21904       | CakSNP21904    | <i>Kabuli</i>    | <i>Ca_Kabuli_denovo</i>      | 16810328                       | (G/T)       |
| 21905       | CakSNP21905    | <i>Kabuli</i>    | <i>Ca_Kabuli_denovo</i>      | 16811019                       | (A/G)       |
| 21906       | CakSNP21906    | <i>Kabuli</i>    | <i>Ca_Kabuli_denovo</i>      | 16817728                       | (C/T)       |
| 21907       | CakSNP21907    | <i>Kabuli</i>    | <i>Ca_Kabuli_denovo</i>      | 16818477                       | (G/T)       |
| 21908       | CakSNP21908    | <i>Kabuli</i>    | <i>Ca_Kabuli_denovo</i>      | 16822925                       | (G/A)       |
| 21909       | CakSNP21909    | <i>Kabuli</i>    | <i>Ca_Kabuli_denovo</i>      | 16839161                       | (T/C)       |
| 21910       | CakSNP21910    | <i>Kabuli</i>    | <i>Ca_Kabuli_denovo</i>      | 16847104                       | (G/A)       |
| 21911       | CakSNP21911    | <i>Kabuli</i>    | <i>Ca_Kabuli_denovo</i>      | 16847905                       | (T/G)       |
| 21912       | CakSNP21912    | <i>Kabuli</i>    | <i>Ca_Kabuli_denovo</i>      | 16847915                       | (T/C)       |
| 21913       | CakSNP21913    | <i>Kabuli</i>    | <i>Ca_Kabuli_denovo</i>      | 16848678                       | (A/G)       |
| 21914       | CakSNP21914    | <i>Kabuli</i>    | <i>Ca_Kabuli_denovo</i>      | 16848818                       | (C/G)       |
| 21915       | CakSNP21915    | <i>Kabuli</i>    | <i>Ca_Kabuli_denovo</i>      | 16849886                       | (C/A)       |
| 21916       | CakSNP21916    | <i>Kabuli</i>    | <i>Ca_Kabuli_denovo</i>      | 16849916                       | (G/C)       |

| <b>S.N.</b> | <b>SNP IDs</b> | <b>Cultivars</b> | <b>Chromosomes/scaffolds</b> | <b>Physical positions (bp)</b> | <b>SNPs</b> |
|-------------|----------------|------------------|------------------------------|--------------------------------|-------------|
| 21917       | CakSNP21917    | <i>Kabuli</i>    | <i>Ca_Kabuli_denovo</i>      | 16854862                       | (C/T)       |
| 21918       | CakSNP21918    | <i>Kabuli</i>    | <i>Ca_Kabuli_denovo</i>      | 16854880                       | (A/G)       |
| 21919       | CakSNP21919    | <i>Kabuli</i>    | <i>Ca_Kabuli_denovo</i>      | 16856071                       | (T/C)       |
| 21920       | CakSNP21920    | <i>Kabuli</i>    | <i>Ca_Kabuli_denovo</i>      | 16857724                       | (G/T)       |
| 21921       | CakSNP21921    | <i>Kabuli</i>    | <i>Ca_Kabuli_denovo</i>      | 16866134                       | (C/T)       |
| 21922       | CakSNP21922    | <i>Kabuli</i>    | <i>Ca_Kabuli_denovo</i>      | 16866191                       | (T/G)       |
| 21923       | CakSNP21923    | <i>Kabuli</i>    | <i>Ca_Kabuli_denovo</i>      | 16867690                       | (G/A)       |
| 21924       | CakSNP21924    | <i>Kabuli</i>    | <i>Ca_Kabuli_denovo</i>      | 16884460                       | (G/C)       |
| 21925       | CakSNP21925    | <i>Kabuli</i>    | <i>Ca_Kabuli_denovo</i>      | 16890964                       | (T/C)       |
| 21926       | CakSNP21926    | <i>Kabuli</i>    | <i>Ca_Kabuli_denovo</i>      | 16890974                       | (A/G)       |
| 21927       | CakSNP21927    | <i>Kabuli</i>    | <i>Ca_Kabuli_denovo</i>      | 16900104                       | (G/A)       |
| 21928       | CakSNP21928    | <i>Kabuli</i>    | <i>Ca_Kabuli_denovo</i>      | 16900127                       | (G/A)       |
| 21929       | CakSNP21929    | <i>Kabuli</i>    | <i>Ca_Kabuli_denovo</i>      | 16901597                       | (T/G)       |
| 21930       | CakSNP21930    | <i>Kabuli</i>    | <i>Ca_Kabuli_denovo</i>      | 16901600                       | (T/A)       |
| 21931       | CakSNP21931    | <i>Kabuli</i>    | <i>Ca_Kabuli_denovo</i>      | 16901701                       | (C/T)       |
| 21932       | CakSNP21932    | <i>Kabuli</i>    | <i>Ca_Kabuli_denovo</i>      | 16904740                       | (A/C)       |
| 21933       | CakSNP21933    | <i>Kabuli</i>    | <i>Ca_Kabuli_denovo</i>      | 16909393                       | (C/G)       |
| 21934       | CakSNP21934    | <i>Kabuli</i>    | <i>Ca_Kabuli_denovo</i>      | 16909447                       | (C/A)       |
| 21935       | CakSNP21935    | <i>Kabuli</i>    | <i>Ca_Kabuli_denovo</i>      | 16913920                       | (G/T)       |
| 21936       | CakSNP21936    | <i>Kabuli</i>    | <i>Ca_Kabuli_denovo</i>      | 16917202                       | (G/C)       |
| 21937       | CakSNP21937    | <i>Kabuli</i>    | <i>Ca_Kabuli_denovo</i>      | 16917212                       | (G/A)       |
| 21938       | CakSNP21938    | <i>Kabuli</i>    | <i>Ca_Kabuli_denovo</i>      | 16921376                       | (A/G)       |
| 21939       | CakSNP21939    | <i>Kabuli</i>    | <i>Ca_Kabuli_denovo</i>      | 16929094                       | (C/T)       |
| 21940       | CakSNP21940    | <i>Kabuli</i>    | <i>Ca_Kabuli_denovo</i>      | 16930382                       | (T/C)       |
| 21941       | CakSNP21941    | <i>Kabuli</i>    | <i>Ca_Kabuli_denovo</i>      | 16936177                       | (A/G)       |
| 21942       | CakSNP21942    | <i>Kabuli</i>    | <i>Ca_Kabuli_denovo</i>      | 16938854                       | (T/C)       |
| 21943       | CakSNP21943    | <i>Kabuli</i>    | <i>Ca_Kabuli_denovo</i>      | 16938863                       | (A/G)       |
| 21944       | CakSNP21944    | <i>Kabuli</i>    | <i>Ca_Kabuli_denovo</i>      | 16947610                       | (G/A)       |
| 21945       | CakSNP21945    | <i>Kabuli</i>    | <i>Ca_Kabuli_denovo</i>      | 16947664                       | (T/C)       |
| 21946       | CakSNP21946    | <i>Kabuli</i>    | <i>Ca_Kabuli_denovo</i>      | 16947792                       | (G/A)       |
| 21947       | CakSNP21947    | <i>Kabuli</i>    | <i>Ca_Kabuli_denovo</i>      | 16950010                       | (T/C)       |
| 21948       | CakSNP21948    | <i>Kabuli</i>    | <i>Ca_Kabuli_denovo</i>      | 16959044                       | (C/G)       |
| 21949       | CakSNP21949    | <i>Kabuli</i>    | <i>Ca_Kabuli_denovo</i>      | 16959070                       | (C/G)       |
| 21950       | CakSNP21950    | <i>Kabuli</i>    | <i>Ca_Kabuli_denovo</i>      | 16959077                       | (G/A)       |
| 21951       | CakSNP21951    | <i>Kabuli</i>    | <i>Ca_Kabuli_denovo</i>      | 16972762                       | (T/C)       |
| 21952       | CakSNP21952    | <i>Kabuli</i>    | <i>Ca_Kabuli_denovo</i>      | 16973548                       | (C/T)       |
| 21953       | CakSNP21953    | <i>Kabuli</i>    | <i>Ca_Kabuli_denovo</i>      | 16973590                       | (C/G)       |
| 21954       | CakSNP21954    | <i>Kabuli</i>    | <i>Ca_Kabuli_denovo</i>      | 16984599                       | (C/G)       |
| 21955       | CakSNP21955    | <i>Kabuli</i>    | <i>Ca_Kabuli_denovo</i>      | 16984785                       | (C/G)       |

| <b>S.N.</b> | <b>SNP IDs</b> | <b>Cultivars</b> | <b>Chromosomes/scaffolds</b> | <b>Physical positions (bp)</b> | <b>SNPs</b> |
|-------------|----------------|------------------|------------------------------|--------------------------------|-------------|
| 21956       | CakSNP21956    | <i>Kabuli</i>    | <i>Ca_Kabuli_denovo</i>      | 16984812                       | (T/C)       |
| 21957       | CakSNP21957    | <i>Kabuli</i>    | <i>Ca_Kabuli_denovo</i>      | 17004468                       | (G/A)       |
| 21958       | CakSNP21958    | <i>Kabuli</i>    | <i>Ca_Kabuli_denovo</i>      | 17004504                       | (C/T)       |
| 21959       | CakSNP21959    | <i>Kabuli</i>    | <i>Ca_Kabuli_denovo</i>      | 17004540                       | (C/T)       |
| 21960       | CakSNP21960    | <i>Kabuli</i>    | <i>Ca_Kabuli_denovo</i>      | 17005753                       | (G/A)       |
| 21961       | CakSNP21961    | <i>Kabuli</i>    | <i>Ca_Kabuli_denovo</i>      | 17005756                       | (A/G)       |
| 21962       | CakSNP21962    | <i>Kabuli</i>    | <i>Ca_Kabuli_denovo</i>      | 17016529                       | (C/T)       |
| 21963       | CakSNP21963    | <i>Kabuli</i>    | <i>Ca_Kabuli_denovo</i>      | 17016536                       | (G/T)       |
| 21964       | CakSNP21964    | <i>Kabuli</i>    | <i>Ca_Kabuli_denovo</i>      | 17016995                       | (A/T)       |
| 21965       | CakSNP21965    | <i>Kabuli</i>    | <i>Ca_Kabuli_denovo</i>      | 17021436                       | (T/G)       |
| 21966       | CakSNP21966    | <i>Kabuli</i>    | <i>Ca_Kabuli_denovo</i>      | 17021442                       | (G/T)       |
| 21967       | CakSNP21967    | <i>Kabuli</i>    | <i>Ca_Kabuli_denovo</i>      | 17024552                       | (C/A)       |
| 21968       | CakSNP21968    | <i>Kabuli</i>    | <i>Ca_Kabuli_denovo</i>      | 17034564                       | (T/C)       |
| 21969       | CakSNP21969    | <i>Kabuli</i>    | <i>Ca_Kabuli_denovo</i>      | 17034585                       | (G/A)       |
| 21970       | CakSNP21970    | <i>Kabuli</i>    | <i>Ca_Kabuli_denovo</i>      | 17035472                       | (G/A)       |
| 21971       | CakSNP21971    | <i>Kabuli</i>    | <i>Ca_Kabuli_denovo</i>      | 17039549                       | (C/G)       |
| 21972       | CakSNP21972    | <i>Kabuli</i>    | <i>Ca_Kabuli_denovo</i>      | 17039551                       | (T/G)       |
| 21973       | CakSNP21973    | <i>Kabuli</i>    | <i>Ca_Kabuli_denovo</i>      | 17042770                       | (C/G)       |
| 21974       | CakSNP21974    | <i>Kabuli</i>    | <i>Ca_Kabuli_denovo</i>      | 17043941                       | (G/A)       |
| 21975       | CakSNP21975    | <i>Kabuli</i>    | <i>Ca_Kabuli_denovo</i>      | 17045500                       | (T/G)       |
| 21976       | CakSNP21976    | <i>Kabuli</i>    | <i>Ca_Kabuli_denovo</i>      | 17050364                       | (G/A)       |
| 21977       | CakSNP21977    | <i>Kabuli</i>    | <i>Ca_Kabuli_denovo</i>      | 17052384                       | (T/G)       |
| 21978       | CakSNP21978    | <i>Kabuli</i>    | <i>Ca_Kabuli_denovo</i>      | 17056471                       | (C/T)       |
| 21979       | CakSNP21979    | <i>Kabuli</i>    | <i>Ca_Kabuli_denovo</i>      | 17056477                       | (C/G)       |
| 21980       | CakSNP21980    | <i>Kabuli</i>    | <i>Ca_Kabuli_denovo</i>      | 17057732                       | (C/T)       |
| 21981       | CakSNP21981    | <i>Kabuli</i>    | <i>Ca_Kabuli_denovo</i>      | 17057823                       | (T/C)       |
| 21982       | CakSNP21982    | <i>Kabuli</i>    | <i>Ca_Kabuli_denovo</i>      | 17057850                       | (G/A)       |
| 21983       | CakSNP21983    | <i>Kabuli</i>    | <i>Ca_Kabuli_denovo</i>      | 17069033                       | (A/C)       |
| 21984       | CakSNP21984    | <i>Kabuli</i>    | <i>Ca_Kabuli_denovo</i>      | 17069653                       | (C/T)       |
| 21985       | CakSNP21985    | <i>Kabuli</i>    | <i>Ca_Kabuli_denovo</i>      | 17069674                       | (T/C)       |
| 21986       | CakSNP21986    | <i>Kabuli</i>    | <i>Ca_Kabuli_denovo</i>      | 17072513                       | (T/C)       |
| 21987       | CakSNP21987    | <i>Kabuli</i>    | <i>Ca_Kabuli_denovo</i>      | 17072515                       | (G/C)       |
| 21988       | CakSNP21988    | <i>Kabuli</i>    | <i>Ca_Kabuli_denovo</i>      | 17072813                       | (T/C)       |
| 21989       | CakSNP21989    | <i>Kabuli</i>    | <i>Ca_Kabuli_denovo</i>      | 17074228                       | (A/G)       |
| 21990       | CakSNP21990    | <i>Kabuli</i>    | <i>Ca_Kabuli_denovo</i>      | 17074250                       | (T/A)       |
| 21991       | CakSNP21991    | <i>Kabuli</i>    | <i>Ca_Kabuli_denovo</i>      | 17074307                       | (A/T)       |
| 21992       | CakSNP21992    | <i>Kabuli</i>    | <i>Ca_Kabuli_denovo</i>      | 17077410                       | (A/G)       |
| 21993       | CakSNP21993    | <i>Kabuli</i>    | <i>Ca_Kabuli_denovo</i>      | 17082462                       | (T/C)       |
| 21994       | CakSNP21994    | <i>Kabuli</i>    | <i>Ca_Kabuli_denovo</i>      | 17082822                       | (A/G)       |

| <b>S.N.</b> | <b>SNP IDs</b> | <b>Cultivars</b> | <b>Chromosomes/scaffolds</b> | <b>Physical positions (bp)</b> | <b>SNPs</b> |
|-------------|----------------|------------------|------------------------------|--------------------------------|-------------|
| 21995       | CakSNP21995    | <i>Kabuli</i>    | <i>Ca_Kabuli_denovo</i>      | 17083441                       | (G/T)       |
| 21996       | CakSNP21996    | <i>Kabuli</i>    | <i>Ca_Kabuli_denovo</i>      | 17085224                       | (T/C)       |
| 21997       | CakSNP21997    | <i>Kabuli</i>    | <i>Ca_Kabuli_denovo</i>      | 17094726                       | (G/A)       |
| 21998       | CakSNP21998    | <i>Kabuli</i>    | <i>Ca_Kabuli_denovo</i>      | 17095757                       | (A/G)       |
| 21999       | CakSNP21999    | <i>Kabuli</i>    | <i>Ca_Kabuli_denovo</i>      | 17100012                       | (C/G)       |
| 22000       | CakSNP22000    | <i>Kabuli</i>    | <i>Ca_Kabuli_denovo</i>      | 17100020                       | (A/C)       |
| 22001       | CakSNP22001    | <i>Kabuli</i>    | <i>Ca_Kabuli_denovo</i>      | 17100026                       | (C/G)       |
| 22002       | CakSNP22002    | <i>Kabuli</i>    | <i>Ca_Kabuli_denovo</i>      | 17100254                       | (A/T)       |
| 22003       | CakSNP22003    | <i>Kabuli</i>    | <i>Ca_Kabuli_denovo</i>      | 17100270                       | (C/G)       |
| 22004       | CakSNP22004    | <i>Kabuli</i>    | <i>Ca_Kabuli_denovo</i>      | 17100331                       | (T/C)       |
| 22005       | CakSNP22005    | <i>Kabuli</i>    | <i>Ca_Kabuli_denovo</i>      | 17105131                       | (T/G)       |
| 22006       | CakSNP22006    | <i>Kabuli</i>    | <i>Ca_Kabuli_denovo</i>      | 17124123                       | (G/C)       |
| 22007       | CakSNP22007    | <i>Kabuli</i>    | <i>Ca_Kabuli_denovo</i>      | 17124179                       | (G/A)       |
| 22008       | CakSNP22008    | <i>Kabuli</i>    | <i>Ca_Kabuli_denovo</i>      | 17135908                       | (C/G)       |
| 22009       | CakSNP22009    | <i>Kabuli</i>    | <i>Ca_Kabuli_denovo</i>      | 17135911                       | (T/C)       |
| 22010       | CakSNP22010    | <i>Kabuli</i>    | <i>Ca_Kabuli_denovo</i>      | 17137643                       | (A/C)       |
| 22011       | CakSNP22011    | <i>Kabuli</i>    | <i>Ca_Kabuli_denovo</i>      | 17145502                       | (C/T)       |
| 22012       | CakSNP22012    | <i>Kabuli</i>    | <i>Ca_Kabuli_denovo</i>      | 17149807                       | (C/G)       |
| 22013       | CakSNP22013    | <i>Kabuli</i>    | <i>Ca_Kabuli_denovo</i>      | 17153306                       | (G/A)       |
| 22014       | CakSNP22014    | <i>Kabuli</i>    | <i>Ca_Kabuli_denovo</i>      | 17153538                       | (A/G)       |
| 22015       | CakSNP22015    | <i>Kabuli</i>    | <i>Ca_Kabuli_denovo</i>      | 17153539                       | (T/C)       |
| 22016       | CakSNP22016    | <i>Kabuli</i>    | <i>Ca_Kabuli_denovo</i>      | 17158844                       | (T/G)       |
| 22017       | CakSNP22017    | <i>Kabuli</i>    | <i>Ca_Kabuli_denovo</i>      | 17158845                       | (C/A)       |
| 22018       | CakSNP22018    | <i>Kabuli</i>    | <i>Ca_Kabuli_denovo</i>      | 17164315                       | (G/T)       |
| 22019       | CakSNP22019    | <i>Kabuli</i>    | <i>Ca_Kabuli_denovo</i>      | 17169559                       | (C/T)       |
| 22020       | CakSNP22020    | <i>Kabuli</i>    | <i>Ca_Kabuli_denovo</i>      | 17173889                       | (C/T)       |
| 22021       | CakSNP22021    | <i>Kabuli</i>    | <i>Ca_Kabuli_denovo</i>      | 17175017                       | (C/G)       |
| 22022       | CakSNP22022    | <i>Kabuli</i>    | <i>Ca_Kabuli_denovo</i>      | 17175032                       | (C/T)       |
| 22023       | CakSNP22023    | <i>Kabuli</i>    | <i>Ca_Kabuli_denovo</i>      | 17183208                       | (C/T)       |
| 22024       | CakSNP22024    | <i>Kabuli</i>    | <i>Ca_Kabuli_denovo</i>      | 17183478                       | (C/G)       |
| 22025       | CakSNP22025    | <i>Kabuli</i>    | <i>Ca_Kabuli_denovo</i>      | 17183481                       | (T/C)       |
| 22026       | CakSNP22026    | <i>Kabuli</i>    | <i>Ca_Kabuli_denovo</i>      | 17191143                       | (A/C)       |
| 22027       | CakSNP22027    | <i>Kabuli</i>    | <i>Ca_Kabuli_denovo</i>      | 17191144                       | (G/A)       |
| 22028       | CakSNP22028    | <i>Kabuli</i>    | <i>Ca_Kabuli_denovo</i>      | 17193826                       | (G/A)       |
| 22029       | CakSNP22029    | <i>Kabuli</i>    | <i>Ca_Kabuli_denovo</i>      | 17194069                       | (G/T)       |
| 22030       | CakSNP22030    | <i>Kabuli</i>    | <i>Ca_Kabuli_denovo</i>      | 17197111                       | (T/G)       |
| 22031       | CakSNP22031    | <i>Kabuli</i>    | <i>Ca_Kabuli_denovo</i>      | 17197112                       | (C/T)       |
| 22032       | CakSNP22032    | <i>Kabuli</i>    | <i>Ca_Kabuli_denovo</i>      | 17211956                       | (G/A)       |
| 22033       | CakSNP22033    | <i>Kabuli</i>    | <i>Ca_Kabuli_denovo</i>      | 17221166                       | (T/C)       |

| <b>S.N.</b> | <b>SNP IDs</b> | <b>Cultivars</b> | <b>Chromosomes/scaffolds</b> | <b>Physical positions (bp)</b> | <b>SNPs</b> |
|-------------|----------------|------------------|------------------------------|--------------------------------|-------------|
| 22034       | CakSNP22034    | <i>Kabuli</i>    | <i>Ca_Kabuli_denovo</i>      | 17222126                       | (G/T)       |
| 22035       | CakSNP22035    | <i>Kabuli</i>    | <i>Ca_Kabuli_denovo</i>      | 17228590                       | (A/G)       |
| 22036       | CakSNP22036    | <i>Kabuli</i>    | <i>Ca_Kabuli_denovo</i>      | 17228617                       | (C/G)       |
| 22037       | CakSNP22037    | <i>Kabuli</i>    | <i>Ca_Kabuli_denovo</i>      | 17229757                       | (T/C)       |
| 22038       | CakSNP22038    | <i>Kabuli</i>    | <i>Ca_Kabuli_denovo</i>      | 17229851                       | (A/G)       |
| 22039       | CakSNP22039    | <i>Kabuli</i>    | <i>Ca_Kabuli_denovo</i>      | 17229856                       | (T/C)       |
| 22040       | CakSNP22040    | <i>Kabuli</i>    | <i>Ca_Kabuli_denovo</i>      | 17230023                       | (C/T)       |
| 22041       | CakSNP22041    | <i>Kabuli</i>    | <i>Ca_Kabuli_denovo</i>      | 17232772                       | (G/A)       |
| 22042       | CakSNP22042    | <i>Kabuli</i>    | <i>Ca_Kabuli_denovo</i>      | 17234123                       | (C/T)       |
| 22043       | CakSNP22043    | <i>Kabuli</i>    | <i>Ca_Kabuli_denovo</i>      | 17234152                       | (T/G)       |
| 22044       | CakSNP22044    | <i>Kabuli</i>    | <i>Ca_Kabuli_denovo</i>      | 17234682                       | (G/A)       |
| 22045       | CakSNP22045    | <i>Kabuli</i>    | <i>Ca_Kabuli_denovo</i>      | 17234713                       | (C/A)       |
| 22046       | CakSNP22046    | <i>Kabuli</i>    | <i>Ca_Kabuli_denovo</i>      | 17236651                       | (C/T)       |
| 22047       | CakSNP22047    | <i>Kabuli</i>    | <i>Ca_Kabuli_denovo</i>      | 17236681                       | (T/C)       |
| 22048       | CakSNP22048    | <i>Kabuli</i>    | <i>Ca_Kabuli_denovo</i>      | 17237146                       | (A/G)       |
| 22049       | CakSNP22049    | <i>Kabuli</i>    | <i>Ca_Kabuli_denovo</i>      | 17259898                       | (C/G)       |
| 22050       | CakSNP22050    | <i>Kabuli</i>    | <i>Ca_Kabuli_denovo</i>      | 17263412                       | (T/G)       |
| 22051       | CakSNP22051    | <i>Kabuli</i>    | <i>Ca_Kabuli_denovo</i>      | 17264715                       | (G/C)       |
| 22052       | CakSNP22052    | <i>Kabuli</i>    | <i>Ca_Kabuli_denovo</i>      | 17264725                       | (T/C)       |
| 22053       | CakSNP22053    | <i>Kabuli</i>    | <i>Ca_Kabuli_denovo</i>      | 17264921                       | (G/A)       |
| 22054       | CakSNP22054    | <i>Kabuli</i>    | <i>Ca_Kabuli_denovo</i>      | 17265470                       | (A/G)       |
| 22055       | CakSNP22055    | <i>Kabuli</i>    | <i>Ca_Kabuli_denovo</i>      | 17270108                       | (G/A)       |
| 22056       | CakSNP22056    | <i>Kabuli</i>    | <i>Ca_Kabuli_denovo</i>      | 17275057                       | (G/A)       |
| 22057       | CakSNP22057    | <i>Kabuli</i>    | <i>Ca_Kabuli_denovo</i>      | 17275063                       | (A/G)       |
| 22058       | CakSNP22058    | <i>Kabuli</i>    | <i>Ca_Kabuli_denovo</i>      | 17284324                       | (A/G)       |
| 22059       | CakSNP22059    | <i>Kabuli</i>    | <i>Ca_Kabuli_denovo</i>      | 17286294                       | (C/T)       |
| 22060       | CakSNP22060    | <i>Kabuli</i>    | <i>Ca_Kabuli_denovo</i>      | 17286314                       | (A/G)       |
| 22061       | CakSNP22061    | <i>Kabuli</i>    | <i>Ca_Kabuli_denovo</i>      | 17288522                       | (C/T)       |
| 22062       | CakSNP22062    | <i>Kabuli</i>    | <i>Ca_Kabuli_denovo</i>      | 17288523                       | (T/C)       |
| 22063       | CakSNP22063    | <i>Kabuli</i>    | <i>Ca_Kabuli_denovo</i>      | 17289626                       | (T/G)       |
| 22064       | CakSNP22064    | <i>Kabuli</i>    | <i>Ca_Kabuli_denovo</i>      | 17290132                       | (C/T)       |
| 22065       | CakSNP22065    | <i>Kabuli</i>    | <i>Ca_Kabuli_denovo</i>      | 17291686                       | (A/C)       |
| 22066       | CakSNP22066    | <i>Kabuli</i>    | <i>Ca_Kabuli_denovo</i>      | 17297188                       | (C/T)       |
| 22067       | CakSNP22067    | <i>Kabuli</i>    | <i>Ca_Kabuli_denovo</i>      | 17297200                       | (G/A)       |
| 22068       | CakSNP22068    | <i>Kabuli</i>    | <i>Ca_Kabuli_denovo</i>      | 17309055                       | (A/G)       |
| 22069       | CakSNP22069    | <i>Kabuli</i>    | <i>Ca_Kabuli_denovo</i>      | 17310208                       | (T/C)       |
| 22070       | CakSNP22070    | <i>Kabuli</i>    | <i>Ca_Kabuli_denovo</i>      | 17313517                       | (C/A)       |
| 22071       | CakSNP22071    | <i>Kabuli</i>    | <i>Ca_Kabuli_denovo</i>      | 17313528                       | (A/C)       |
| 22072       | CakSNP22072    | <i>Kabuli</i>    | <i>Ca_Kabuli_denovo</i>      | 17313529                       | (G/C)       |

| <b>S.N.</b> | <b>SNP IDs</b> | <b>Cultivars</b> | <b>Chromosomes/scaffolds</b> | <b>Physical positions (bp)</b> | <b>SNPs</b> |
|-------------|----------------|------------------|------------------------------|--------------------------------|-------------|
| 22073       | CakSNP22073    | <i>Kabuli</i>    | <i>Ca_Kabuli_denovo</i>      | 17317567                       | (C/T)       |
| 22074       | CakSNP22074    | <i>Kabuli</i>    | <i>Ca_Kabuli_denovo</i>      | 17318919                       | (T/G)       |
| 22075       | CakSNP22075    | <i>Kabuli</i>    | <i>Ca_Kabuli_denovo</i>      | 17319872                       | (C/T)       |
| 22076       | CakSNP22076    | <i>Kabuli</i>    | <i>Ca_Kabuli_denovo</i>      | 17321416                       | (C/A)       |
| 22077       | CakSNP22077    | <i>Kabuli</i>    | <i>Ca_Kabuli_denovo</i>      | 17330189                       | (T/C)       |
| 22078       | CakSNP22078    | <i>Kabuli</i>    | <i>Ca_Kabuli_denovo</i>      | 17330572                       | (T/G)       |
| 22079       | CakSNP22079    | <i>Kabuli</i>    | <i>Ca_Kabuli_denovo</i>      | 17335969                       | (T/C)       |
| 22080       | CakSNP22080    | <i>Kabuli</i>    | <i>Ca_Kabuli_denovo</i>      | 17335978                       | (C/T)       |
| 22081       | CakSNP22081    | <i>Kabuli</i>    | <i>Ca_Kabuli_denovo</i>      | 17336333                       | (C/T)       |
| 22082       | CakSNP22082    | <i>Kabuli</i>    | <i>Ca_Kabuli_denovo</i>      | 17336409                       | (T/C)       |
| 22083       | CakSNP22083    | <i>Kabuli</i>    | <i>Ca_Kabuli_denovo</i>      | 17339624                       | (A/G)       |
| 22084       | CakSNP22084    | <i>Kabuli</i>    | <i>Ca_Kabuli_denovo</i>      | 17347047                       | (G/T)       |
| 22085       | CakSNP22085    | <i>Kabuli</i>    | <i>Ca_Kabuli_denovo</i>      | 17347065                       | (G/C)       |
| 22086       | CakSNP22086    | <i>Kabuli</i>    | <i>Ca_Kabuli_denovo</i>      | 17349179                       | (C/A)       |
| 22087       | CakSNP22087    | <i>Kabuli</i>    | <i>Ca_Kabuli_denovo</i>      | 17350379                       | (C/T)       |
| 22088       | CakSNP22088    | <i>Kabuli</i>    | <i>Ca_Kabuli_denovo</i>      | 17350403                       | (G/C)       |
| 22089       | CakSNP22089    | <i>Kabuli</i>    | <i>Ca_Kabuli_denovo</i>      | 17355331                       | (C/T)       |
| 22090       | CakSNP22090    | <i>Kabuli</i>    | <i>Ca_Kabuli_denovo</i>      | 17355343                       | (T/G)       |
| 22091       | CakSNP22091    | <i>Kabuli</i>    | <i>Ca_Kabuli_denovo</i>      | 17363326                       | (A/G)       |
| 22092       | CakSNP22092    | <i>Kabuli</i>    | <i>Ca_Kabuli_denovo</i>      | 17363362                       | (C/G)       |
| 22093       | CakSNP22093    | <i>Kabuli</i>    | <i>Ca_Kabuli_denovo</i>      | 17363588                       | (G/C)       |
| 22094       | CakSNP22094    | <i>Kabuli</i>    | <i>Ca_Kabuli_denovo</i>      | 17363607                       | (G/A)       |
| 22095       | CakSNP22095    | <i>Kabuli</i>    | <i>Ca_Kabuli_denovo</i>      | 17365595                       | (A/G)       |
| 22096       | CakSNP22096    | <i>Kabuli</i>    | <i>Ca_Kabuli_denovo</i>      | 17367130                       | (T/G)       |
| 22097       | CakSNP22097    | <i>Kabuli</i>    | <i>Ca_Kabuli_denovo</i>      | 17372448                       | (G/A)       |
| 22098       | CakSNP22098    | <i>Kabuli</i>    | <i>Ca_Kabuli_denovo</i>      | 17372474                       | (G/T)       |
| 22099       | CakSNP22099    | <i>Kabuli</i>    | <i>Ca_Kabuli_denovo</i>      | 17374148                       | (T/C)       |
| 22100       | CakSNP22100    | <i>Kabuli</i>    | <i>Ca_Kabuli_denovo</i>      | 17374150                       | (G/A)       |
| 22101       | CakSNP22101    | <i>Kabuli</i>    | <i>Ca_Kabuli_denovo</i>      | 17374982                       | (C/G)       |
| 22102       | CakSNP22102    | <i>Kabuli</i>    | <i>Ca_Kabuli_denovo</i>      | 17383714                       | (G/C)       |
| 22103       | CakSNP22103    | <i>Kabuli</i>    | <i>Ca_Kabuli_denovo</i>      | 17390158                       | (C/T)       |
| 22104       | CakSNP22104    | <i>Kabuli</i>    | <i>Ca_Kabuli_denovo</i>      | 17391946                       | (G/A)       |
| 22105       | CakSNP22105    | <i>Kabuli</i>    | <i>Ca_Kabuli_denovo</i>      | 17392021                       | (A/G)       |
| 22106       | CakSNP22106    | <i>Kabuli</i>    | <i>Ca_Kabuli_denovo</i>      | 17396458                       | (G/A)       |
| 22107       | CakSNP22107    | <i>Kabuli</i>    | <i>Ca_Kabuli_denovo</i>      | 17400281                       | (G/C)       |
| 22108       | CakSNP22108    | <i>Kabuli</i>    | <i>Ca_Kabuli_denovo</i>      | 17418177                       | (G/A)       |
| 22109       | CakSNP22109    | <i>Kabuli</i>    | <i>Ca_Kabuli_denovo</i>      | 17418195                       | (G/A)       |
| 22110       | CakSNP22110    | <i>Kabuli</i>    | <i>Ca_Kabuli_denovo</i>      | 17423923                       | (A/C)       |
| 22111       | CakSNP22111    | <i>Kabuli</i>    | <i>Ca_Kabuli_denovo</i>      | 17425180                       | (T/A)       |



| <b>S.N.</b> | <b>SNP IDs</b> | <b>Cultivars</b> | <b>Chromosomes/scaffolds</b> | <b>Physical positions (bp)</b> | <b>SNPs</b> |
|-------------|----------------|------------------|------------------------------|--------------------------------|-------------|
| 22112       | CakSNP22112    | <i>Kabuli</i>    | <i>Ca_Kabuli_denovo</i>      | 17425534                       | (G/C)       |
| 22113       | CakSNP22113    | <i>Kabuli</i>    | <i>Ca_Kabuli_denovo</i>      | 17426379                       | (C/T)       |
| 22114       | CakSNP22114    | <i>Kabuli</i>    | <i>Ca_Kabuli_denovo</i>      | 17427763                       | (A/G)       |
| 22115       | CakSNP22115    | <i>Kabuli</i>    | <i>Ca_Kabuli_denovo</i>      | 17427807                       | (G/A)       |
| 22116       | CakSNP22116    | <i>Kabuli</i>    | <i>Ca_Kabuli_denovo</i>      | 17429423                       | (A/G)       |
| 22117       | CakSNP22117    | <i>Kabuli</i>    | <i>Ca_Kabuli_denovo</i>      | 17429444                       | (G/A)       |
| 22118       | CakSNP22118    | <i>Kabuli</i>    | <i>Ca_Kabuli_denovo</i>      | 17432893                       | (G/A)       |
| 22119       | CakSNP22119    | <i>Kabuli</i>    | <i>Ca_Kabuli_denovo</i>      | 17438905                       | (A/G)       |
| 22120       | CakSNP22120    | <i>Kabuli</i>    | <i>Ca_Kabuli_denovo</i>      | 17454408                       | (G/A)       |
| 22121       | CakSNP22121    | <i>Kabuli</i>    | <i>Ca_Kabuli_denovo</i>      | 17454527                       | (C/G)       |
| 22122       | CakSNP22122    | <i>Kabuli</i>    | <i>Ca_Kabuli_denovo</i>      | 17454584                       | (G/A)       |
| 22123       | CakSNP22123    | <i>Kabuli</i>    | <i>Ca_Kabuli_denovo</i>      | 17458338                       | (C/G)       |
| 22124       | CakSNP22124    | <i>Kabuli</i>    | <i>Ca_Kabuli_denovo</i>      | 17458378                       | (A/C)       |
| 22125       | CakSNP22125    | <i>Kabuli</i>    | <i>Ca_Kabuli_denovo</i>      | 17460854                       | (C/A)       |
| 22126       | CakSNP22126    | <i>Kabuli</i>    | <i>Ca_Kabuli_denovo</i>      | 17462015                       | (T/C)       |
| 22127       | CakSNP22127    | <i>Kabuli</i>    | <i>Ca_Kabuli_denovo</i>      | 17462108                       | (G/T)       |
| 22128       | CakSNP22128    | <i>Kabuli</i>    | <i>Ca_Kabuli_denovo</i>      | 17463999                       | (T/G)       |
| 22129       | CakSNP22129    | <i>Kabuli</i>    | <i>Ca_Kabuli_denovo</i>      | 17464342                       | (A/G)       |
| 22130       | CakSNP22130    | <i>Kabuli</i>    | <i>Ca_Kabuli_denovo</i>      | 17465423                       | (C/T)       |
| 22131       | CakSNP22131    | <i>Kabuli</i>    | <i>Ca_Kabuli_denovo</i>      | 17465429                       | (A/G)       |
| 22132       | CakSNP22132    | <i>Kabuli</i>    | <i>Ca_Kabuli_denovo</i>      | 17467389                       | (A/G)       |
| 22133       | CakSNP22133    | <i>Kabuli</i>    | <i>Ca_Kabuli_denovo</i>      | 17468575                       | (A/T)       |
| 22134       | CakSNP22134    | <i>Kabuli</i>    | <i>Ca_Kabuli_denovo</i>      | 17472963                       | (C/A)       |
| 22135       | CakSNP22135    | <i>Kabuli</i>    | <i>Ca_Kabuli_denovo</i>      | 17475553                       | (A/G)       |
| 22136       | CakSNP22136    | <i>Kabuli</i>    | <i>Ca_Kabuli_denovo</i>      | 17475769                       | (A/C)       |
| 22137       | CakSNP22137    | <i>Kabuli</i>    | <i>Ca_Kabuli_denovo</i>      | 17484863                       | (A/G)       |
| 22138       | CakSNP22138    | <i>Kabuli</i>    | <i>Ca_Kabuli_denovo</i>      | 17484890                       | (C/A)       |
| 22139       | CakSNP22139    | <i>Kabuli</i>    | <i>Ca_Kabuli_denovo</i>      | 17490392                       | (G/A)       |
| 22140       | CakSNP22140    | <i>Kabuli</i>    | <i>Ca_Kabuli_denovo</i>      | 17491797                       | (C/T)       |
| 22141       | CakSNP22141    | <i>Kabuli</i>    | <i>Ca_Kabuli_denovo</i>      | 17494871                       | (A/T)       |
| 22142       | CakSNP22142    | <i>Kabuli</i>    | <i>Ca_Kabuli_denovo</i>      | 17495308                       | (T/C)       |
| 22143       | CakSNP22143    | <i>Kabuli</i>    | <i>Ca_Kabuli_denovo</i>      | 17495506                       | (A/T)       |
| 22144       | CakSNP22144    | <i>Kabuli</i>    | <i>Ca_Kabuli_denovo</i>      | 17495658                       | (A/G)       |
| 22145       | CakSNP22145    | <i>Kabuli</i>    | <i>Ca_Kabuli_denovo</i>      | 17495911                       | (C/A)       |
| 22146       | CakSNP22146    | <i>Kabuli</i>    | <i>Ca_Kabuli_denovo</i>      | 17495980                       | (C/G)       |
| 22147       | CakSNP22147    | <i>Kabuli</i>    | <i>Ca_Kabuli_denovo</i>      | 17496047                       | (A/G)       |
| 22148       | CakSNP22148    | <i>Kabuli</i>    | <i>Ca_Kabuli_denovo</i>      | 17496086                       | (C/T)       |
| 22149       | CakSNP22149    | <i>Kabuli</i>    | <i>Ca_Kabuli_denovo</i>      | 17498540                       | (G/C)       |
| 22150       | CakSNP22150    | <i>Kabuli</i>    | <i>Ca_Kabuli_denovo</i>      | 17502327                       | (C/G)       |

| <b>S.N.</b> | <b>SNP IDs</b> | <b>Cultivars</b> | <b>Chromosomes/scaffolds</b> | <b>Physical positions (bp)</b> | <b>SNPs</b> |
|-------------|----------------|------------------|------------------------------|--------------------------------|-------------|
| 22151       | CakSNP22151    | <i>Kabuli</i>    | <i>Ca_Kabuli_denovo</i>      | 17502354                       | (C/T)       |
| 22152       | CakSNP22152    | <i>Kabuli</i>    | <i>Ca_Kabuli_denovo</i>      | 17509865                       | (C/G)       |
| 22153       | CakSNP22153    | <i>Kabuli</i>    | <i>Ca_Kabuli_denovo</i>      | 17509874                       | (G/T)       |
| 22154       | CakSNP22154    | <i>Kabuli</i>    | <i>Ca_Kabuli_denovo</i>      | 17512372                       | (G/C)       |
| 22155       | CakSNP22155    | <i>Kabuli</i>    | <i>Ca_Kabuli_denovo</i>      | 17512443                       | (A/G)       |
| 22156       | CakSNP22156    | <i>Kabuli</i>    | <i>Ca_Kabuli_denovo</i>      | 17514272                       | (T/G)       |
| 22157       | CakSNP22157    | <i>Kabuli</i>    | <i>Ca_Kabuli_denovo</i>      | 17514319                       | (A/C)       |
| 22158       | CakSNP22158    | <i>Kabuli</i>    | <i>Ca_Kabuli_denovo</i>      | 17515725                       | (T/C)       |
| 22159       | CakSNP22159    | <i>Kabuli</i>    | <i>Ca_Kabuli_denovo</i>      | 17515728                       | (A/G)       |
| 22160       | CakSNP22160    | <i>Kabuli</i>    | <i>Ca_Kabuli_denovo</i>      | 17516278                       | (A/G)       |
| 22161       | CakSNP22161    | <i>Kabuli</i>    | <i>Ca_Kabuli_denovo</i>      | 17517744                       | (A/G)       |
| 22162       | CakSNP22162    | <i>Kabuli</i>    | <i>Ca_Kabuli_denovo</i>      | 17519081                       | (A/G)       |
| 22163       | CakSNP22163    | <i>Kabuli</i>    | <i>Ca_Kabuli_denovo</i>      | 17519153                       | (C/G)       |
| 22164       | CakSNP22164    | <i>Kabuli</i>    | <i>Ca_Kabuli_denovo</i>      | 17522335                       | (A/G)       |
| 22165       | CakSNP22165    | <i>Kabuli</i>    | <i>Ca_Kabuli_denovo</i>      | 17522341                       | (C/G)       |
| 22166       | CakSNP22166    | <i>Kabuli</i>    | <i>Ca_Kabuli_denovo</i>      | 17543443                       | (A/G)       |
| 22167       | CakSNP22167    | <i>Kabuli</i>    | <i>Ca_Kabuli_denovo</i>      | 17554118                       | (A/G)       |
| 22168       | CakSNP22168    | <i>Kabuli</i>    | <i>Ca_Kabuli_denovo</i>      | 17554879                       | (G/A)       |
| 22169       | CakSNP22169    | <i>Kabuli</i>    | <i>Ca_Kabuli_denovo</i>      | 17555105                       | (G/A)       |
| 22170       | CakSNP22170    | <i>Kabuli</i>    | <i>Ca_Kabuli_denovo</i>      | 17555680                       | (C/T)       |
| 22171       | CakSNP22171    | <i>Kabuli</i>    | <i>Ca_Kabuli_denovo</i>      | 17563276                       | (A/C)       |
| 22172       | CakSNP22172    | <i>Kabuli</i>    | <i>Ca_Kabuli_denovo</i>      | 17563281                       | (G/A)       |
| 22173       | CakSNP22173    | <i>Kabuli</i>    | <i>Ca_Kabuli_denovo</i>      | 17568185                       | (A/G)       |
| 22174       | CakSNP22174    | <i>Kabuli</i>    | <i>Ca_Kabuli_denovo</i>      | 17568195                       | (A/G)       |
| 22175       | CakSNP22175    | <i>Kabuli</i>    | <i>Ca_Kabuli_denovo</i>      | 17568481                       | (A/C)       |
| 22176       | CakSNP22176    | <i>Kabuli</i>    | <i>Ca_Kabuli_denovo</i>      | 17568536                       | (A/G)       |
| 22177       | CakSNP22177    | <i>Kabuli</i>    | <i>Ca_Kabuli_denovo</i>      | 17569512                       | (C/G)       |
| 22178       | CakSNP22178    | <i>Kabuli</i>    | <i>Ca_Kabuli_denovo</i>      | 17571190                       | (T/C)       |
| 22179       | CakSNP22179    | <i>Kabuli</i>    | <i>Ca_Kabuli_denovo</i>      | 17575857                       | (G/C)       |
| 22180       | CakSNP22180    | <i>Kabuli</i>    | <i>Ca_Kabuli_denovo</i>      | 17575861                       | (A/G)       |
| 22181       | CakSNP22181    | <i>Kabuli</i>    | <i>Ca_Kabuli_denovo</i>      | 17575862                       | (A/G)       |
| 22182       | CakSNP22182    | <i>Kabuli</i>    | <i>Ca_Kabuli_denovo</i>      | 17575990                       | (A/G)       |
| 22183       | CakSNP22183    | <i>Kabuli</i>    | <i>Ca_Kabuli_denovo</i>      | 17576348                       | (T/C)       |
| 22184       | CakSNP22184    | <i>Kabuli</i>    | <i>Ca_Kabuli_denovo</i>      | 17577311                       | (G/T)       |
| 22185       | CakSNP22185    | <i>Kabuli</i>    | <i>Ca_Kabuli_denovo</i>      | 17577949                       | (T/G)       |
| 22186       | CakSNP22186    | <i>Kabuli</i>    | <i>Ca_Kabuli_denovo</i>      | 17578019                       | (C/G)       |
| 22187       | CakSNP22187    | <i>Kabuli</i>    | <i>Ca_Kabuli_denovo</i>      | 17587745                       | (A/G)       |
| 22188       | CakSNP22188    | <i>Kabuli</i>    | <i>Ca_Kabuli_denovo</i>      | 17587759                       | (A/G)       |
| 22189       | CakSNP22189    | <i>Kabuli</i>    | <i>Ca_Kabuli_denovo</i>      | 17588013                       | (C/A)       |

| <b>S.N.</b> | <b>SNP IDs</b> | <b>Cultivars</b> | <b>Chromosomes/scaffolds</b> | <b>Physical positions (bp)</b> | <b>SNPs</b> |
|-------------|----------------|------------------|------------------------------|--------------------------------|-------------|
| 22190       | CakSNP22190    | <i>Kabuli</i>    | <i>Ca_Kabuli_denovo</i>      | 17588037                       | (A/G)       |
| 22191       | CakSNP22191    | <i>Kabuli</i>    | <i>Ca_Kabuli_denovo</i>      | 17588065                       | (C/T)       |
| 22192       | CakSNP22192    | <i>Kabuli</i>    | <i>Ca_Kabuli_denovo</i>      | 17589665                       | (C/T)       |
| 22193       | CakSNP22193    | <i>Kabuli</i>    | <i>Ca_Kabuli_denovo</i>      | 17589862                       | (C/G)       |
| 22194       | CakSNP22194    | <i>Kabuli</i>    | <i>Ca_Kabuli_denovo</i>      | 17593933                       | (G/A)       |
| 22195       | CakSNP22195    | <i>Kabuli</i>    | <i>Ca_Kabuli_denovo</i>      | 17593960                       | (A/G)       |
| 22196       | CakSNP22196    | <i>Kabuli</i>    | <i>Ca_Kabuli_denovo</i>      | 17605730                       | (G/A)       |
| 22197       | CakSNP22197    | <i>Kabuli</i>    | <i>Ca_Kabuli_denovo</i>      | 17609678                       | (G/C)       |
| 22198       | CakSNP22198    | <i>Kabuli</i>    | <i>Ca_Kabuli_denovo</i>      | 17609709                       | (A/G)       |
| 22199       | CakSNP22199    | <i>Kabuli</i>    | <i>Ca_Kabuli_denovo</i>      | 17610652                       | (A/G)       |
| 22200       | CakSNP22200    | <i>Kabuli</i>    | <i>Ca_Kabuli_denovo</i>      | 17610664                       | (G/C)       |
| 22201       | CakSNP22201    | <i>Kabuli</i>    | <i>Ca_Kabuli_denovo</i>      | 17610812                       | (G/A)       |
| 22202       | CakSNP22202    | <i>Kabuli</i>    | <i>Ca_Kabuli_denovo</i>      | 17610820                       | (C/T)       |
| 22203       | CakSNP22203    | <i>Kabuli</i>    | <i>Ca_Kabuli_denovo</i>      | 17611216                       | (C/T)       |
| 22204       | CakSNP22204    | <i>Kabuli</i>    | <i>Ca_Kabuli_denovo</i>      | 17611222                       | (A/G)       |
| 22205       | CakSNP22205    | <i>Kabuli</i>    | <i>Ca_Kabuli_denovo</i>      | 17621283                       | (C/T)       |
| 22206       | CakSNP22206    | <i>Kabuli</i>    | <i>Ca_Kabuli_denovo</i>      | 17621351                       | (T/C)       |
| 22207       | CakSNP22207    | <i>Kabuli</i>    | <i>Ca_Kabuli_denovo</i>      | 17625679                       | (A/G)       |
| 22208       | CakSNP22208    | <i>Kabuli</i>    | <i>Ca_Kabuli_denovo</i>      | 17626513                       | (T/G)       |
| 22209       | CakSNP22209    | <i>Kabuli</i>    | <i>Ca_Kabuli_denovo</i>      | 17627257                       | (C/T)       |
| 22210       | CakSNP22210    | <i>Kabuli</i>    | <i>Ca_Kabuli_denovo</i>      | 17634324                       | (G/T)       |
| 22211       | CakSNP22211    | <i>Kabuli</i>    | <i>Ca_Kabuli_denovo</i>      | 17634364                       | (G/A)       |
| 22212       | CakSNP22212    | <i>Kabuli</i>    | <i>Ca_Kabuli_denovo</i>      | 17643307                       | (G/A)       |
| 22213       | CakSNP22213    | <i>Kabuli</i>    | <i>Ca_Kabuli_denovo</i>      | 17645604                       | (A/G)       |
| 22214       | CakSNP22214    | <i>Kabuli</i>    | <i>Ca_Kabuli_denovo</i>      | 17648275                       | (C/T)       |
| 22215       | CakSNP22215    | <i>Kabuli</i>    | <i>Ca_Kabuli_denovo</i>      | 17651790                       | (C/T)       |
| 22216       | CakSNP22216    | <i>Kabuli</i>    | <i>Ca_Kabuli_denovo</i>      | 17651792                       | (G/C)       |
| 22217       | CakSNP22217    | <i>Kabuli</i>    | <i>Ca_Kabuli_denovo</i>      | 17653212                       | (C/A)       |
| 22218       | CakSNP22218    | <i>Kabuli</i>    | <i>Ca_Kabuli_denovo</i>      | 17653385                       | (A/G)       |
| 22219       | CakSNP22219    | <i>Kabuli</i>    | <i>Ca_Kabuli_denovo</i>      | 17653412                       | (T/C)       |
| 22220       | CakSNP22220    | <i>Kabuli</i>    | <i>Ca_Kabuli_denovo</i>      | 17655910                       | (G/A)       |
| 22221       | CakSNP22221    | <i>Kabuli</i>    | <i>Ca_Kabuli_denovo</i>      | 17659610                       | (C/T)       |
| 22222       | CakSNP22222    | <i>Kabuli</i>    | <i>Ca_Kabuli_denovo</i>      | 17660788                       | (G/T)       |
| 22223       | CakSNP22223    | <i>Kabuli</i>    | <i>Ca_Kabuli_denovo</i>      | 17664464                       | (G/A)       |
| 22224       | CakSNP22224    | <i>Kabuli</i>    | <i>Ca_Kabuli_denovo</i>      | 17664469                       | (C/T)       |
| 22225       | CakSNP22225    | <i>Kabuli</i>    | <i>Ca_Kabuli_denovo</i>      | 17667464                       | (A/C)       |
| 22226       | CakSNP22226    | <i>Kabuli</i>    | <i>Ca_Kabuli_denovo</i>      | 17667796                       | (C/G)       |
| 22227       | CakSNP22227    | <i>Kabuli</i>    | <i>Ca_Kabuli_denovo</i>      | 17667823                       | (A/G)       |
| 22228       | CakSNP22228    | <i>Kabuli</i>    | <i>Ca_Kabuli_denovo</i>      | 17668198                       | (T/C)       |

| <b>S.N.</b> | <b>SNP IDs</b> | <b>Cultivars</b> | <b>Chromosomes/scaffolds</b> | <b>Physical positions (bp)</b> | <b>SNPs</b> |
|-------------|----------------|------------------|------------------------------|--------------------------------|-------------|
| 22229       | CakSNP22229    | <i>Kabuli</i>    | <i>Ca_Kabuli_denovo</i>      | 17675941                       | (C/T)       |
| 22230       | CakSNP22230    | <i>Kabuli</i>    | <i>Ca_Kabuli_denovo</i>      | 17675953                       | (C/G)       |
| 22231       | CakSNP22231    | <i>Kabuli</i>    | <i>Ca_Kabuli_denovo</i>      | 17681320                       | (T/C)       |
| 22232       | CakSNP22232    | <i>Kabuli</i>    | <i>Ca_Kabuli_denovo</i>      | 17686750                       | (C/T)       |
| 22233       | CakSNP22233    | <i>Kabuli</i>    | <i>Ca_Kabuli_denovo</i>      | 17686802                       | (C/T)       |
| 22234       | CakSNP22234    | <i>Kabuli</i>    | <i>Ca_Kabuli_denovo</i>      | 17690386                       | (A/G)       |
| 22235       | CakSNP22235    | <i>Kabuli</i>    | <i>Ca_Kabuli_denovo</i>      | 17690457                       | (T/G)       |
| 22236       | CakSNP22236    | <i>Kabuli</i>    | <i>Ca_Kabuli_denovo</i>      | 17695830                       | (T/C)       |
| 22237       | CakSNP22237    | <i>Kabuli</i>    | <i>Ca_Kabuli_denovo</i>      | 17696236                       | (A/G)       |
| 22238       | CakSNP22238    | <i>Kabuli</i>    | <i>Ca_Kabuli_denovo</i>      | 17703446                       | (C/T)       |
| 22239       | CakSNP22239    | <i>Kabuli</i>    | <i>Ca_Kabuli_denovo</i>      | 17707089                       | (T/G)       |
| 22240       | CakSNP22240    | <i>Kabuli</i>    | <i>Ca_Kabuli_denovo</i>      | 17714825                       | (A/C)       |
| 22241       | CakSNP22241    | <i>Kabuli</i>    | <i>Ca_Kabuli_denovo</i>      | 17719103                       | (A/C)       |
| 22242       | CakSNP22242    | <i>Kabuli</i>    | <i>Ca_Kabuli_denovo</i>      | 17729630                       | (G/A)       |
| 22243       | CakSNP22243    | <i>Kabuli</i>    | <i>Ca_Kabuli_denovo</i>      | 17729707                       | (G/T)       |
| 22244       | CakSNP22244    | <i>Kabuli</i>    | <i>Ca_Kabuli_denovo</i>      | 17730593                       | (G/C)       |
| 22245       | CakSNP22245    | <i>Kabuli</i>    | <i>Ca_Kabuli_denovo</i>      | 17730605                       | (A/C)       |
| 22246       | CakSNP22246    | <i>Kabuli</i>    | <i>Ca_Kabuli_denovo</i>      | 17730836                       | (A/C)       |
| 22247       | CakSNP22247    | <i>Kabuli</i>    | <i>Ca_Kabuli_denovo</i>      | 17737454                       | (G/A)       |
| 22248       | CakSNP22248    | <i>Kabuli</i>    | <i>Ca_Kabuli_denovo</i>      | 17737466                       | (A/G)       |
| 22249       | CakSNP22249    | <i>Kabuli</i>    | <i>Ca_Kabuli_denovo</i>      | 17741720                       | (G/C)       |
| 22250       | CakSNP22250    | <i>Kabuli</i>    | <i>Ca_Kabuli_denovo</i>      | 17743579                       | (C/T)       |
| 22251       | CakSNP22251    | <i>Kabuli</i>    | <i>Ca_Kabuli_denovo</i>      | 17745440                       | (T/C)       |
| 22252       | CakSNP22252    | <i>Kabuli</i>    | <i>Ca_Kabuli_denovo</i>      | 17745478                       | (C/T)       |
| 22253       | CakSNP22253    | <i>Kabuli</i>    | <i>Ca_Kabuli_denovo</i>      | 17746537                       | (T/G)       |
| 22254       | CakSNP22254    | <i>Kabuli</i>    | <i>Ca_Kabuli_denovo</i>      | 17749390                       | (C/G)       |
| 22255       | CakSNP22255    | <i>Kabuli</i>    | <i>Ca_Kabuli_denovo</i>      | 17749399                       | (T/C)       |
| 22256       | CakSNP22256    | <i>Kabuli</i>    | <i>Ca_Kabuli_denovo</i>      | 17753739                       | (T/A)       |
| 22257       | CakSNP22257    | <i>Kabuli</i>    | <i>Ca_Kabuli_denovo</i>      | 17760588                       | (A/G)       |
| 22258       | CakSNP22258    | <i>Kabuli</i>    | <i>Ca_Kabuli_denovo</i>      | 17760620                       | (C/T)       |
| 22259       | CakSNP22259    | <i>Kabuli</i>    | <i>Ca_Kabuli_denovo</i>      | 17760650                       | (T/G)       |
| 22260       | CakSNP22260    | <i>Kabuli</i>    | <i>Ca_Kabuli_denovo</i>      | 17761956                       | (G/A)       |
| 22261       | CakSNP22261    | <i>Kabuli</i>    | <i>Ca_Kabuli_denovo</i>      | 17765524                       | (G/T)       |
| 22262       | CakSNP22262    | <i>Kabuli</i>    | <i>Ca_Kabuli_denovo</i>      | 17765543                       | (G/C)       |
| 22263       | CakSNP22263    | <i>Kabuli</i>    | <i>Ca_Kabuli_denovo</i>      | 17781649                       | (G/C)       |
| 22264       | CakSNP22264    | <i>Kabuli</i>    | <i>Ca_Kabuli_denovo</i>      | 17785598                       | (G/C)       |
| 22265       | CakSNP22265    | <i>Kabuli</i>    | <i>Ca_Kabuli_denovo</i>      | 17785614                       | (T/G)       |
| 22266       | CakSNP22266    | <i>Kabuli</i>    | <i>Ca_Kabuli_denovo</i>      | 17785643                       | (T/C)       |
| 22267       | CakSNP22267    | <i>Kabuli</i>    | <i>Ca_Kabuli_denovo</i>      | 17787071                       | (A/G)       |

| <b>S.N.</b> | <b>SNP IDs</b> | <b>Cultivars</b> | <b>Chromosomes/scaffolds</b> | <b>Physical positions (bp)</b> | <b>SNPs</b> |
|-------------|----------------|------------------|------------------------------|--------------------------------|-------------|
| 22268       | CakSNP22268    | <i>Kabuli</i>    | <i>Ca_Kabuli_denovo</i>      | 17790731                       | (G/A)       |
| 22269       | CakSNP22269    | <i>Kabuli</i>    | <i>Ca_Kabuli_denovo</i>      | 17792770                       | (C/T)       |
| 22270       | CakSNP22270    | <i>Kabuli</i>    | <i>Ca_Kabuli_denovo</i>      | 17792777                       | (G/A)       |
| 22271       | CakSNP22271    | <i>Kabuli</i>    | <i>Ca_Kabuli_denovo</i>      | 17792957                       | (C/T)       |
| 22272       | CakSNP22272    | <i>Kabuli</i>    | <i>Ca_Kabuli_denovo</i>      | 17792964                       | (G/A)       |
| 22273       | CakSNP22273    | <i>Kabuli</i>    | <i>Ca_Kabuli_denovo</i>      | 17809880                       | (T/C)       |
| 22274       | CakSNP22274    | <i>Kabuli</i>    | <i>Ca_Kabuli_denovo</i>      | 17809913                       | (G/A)       |
| 22275       | CakSNP22275    | <i>Kabuli</i>    | <i>Ca_Kabuli_denovo</i>      | 17813020                       | (G/A)       |
| 22276       | CakSNP22276    | <i>Kabuli</i>    | <i>Ca_Kabuli_denovo</i>      | 17813023                       | (C/G)       |
| 22277       | CakSNP22277    | <i>Kabuli</i>    | <i>Ca_Kabuli_denovo</i>      | 17814716                       | (C/T)       |
| 22278       | CakSNP22278    | <i>Kabuli</i>    | <i>Ca_Kabuli_denovo</i>      | 17814788                       | (C/G)       |
| 22279       | CakSNP22279    | <i>Kabuli</i>    | <i>Ca_Kabuli_denovo</i>      | 17818318                       | (C/A)       |
| 22280       | CakSNP22280    | <i>Kabuli</i>    | <i>Ca_Kabuli_denovo</i>      | 17830073                       | (C/T)       |
| 22281       | CakSNP22281    | <i>Kabuli</i>    | <i>Ca_Kabuli_denovo</i>      | 17831657                       | (A/G)       |
| 22282       | CakSNP22282    | <i>Kabuli</i>    | <i>Ca_Kabuli_denovo</i>      | 17831663                       | (G/T)       |
| 22283       | CakSNP22283    | <i>Kabuli</i>    | <i>Ca_Kabuli_denovo</i>      | 17832301                       | (G/A)       |
| 22284       | CakSNP22284    | <i>Kabuli</i>    | <i>Ca_Kabuli_denovo</i>      | 17832314                       | (G/A)       |
| 22285       | CakSNP22285    | <i>Kabuli</i>    | <i>Ca_Kabuli_denovo</i>      | 17837354                       | (T/C)       |
| 22286       | CakSNP22286    | <i>Kabuli</i>    | <i>Ca_Kabuli_denovo</i>      | 17838454                       | (G/A)       |
| 22287       | CakSNP22287    | <i>Kabuli</i>    | <i>Ca_Kabuli_denovo</i>      | 17844685                       | (A/C)       |
| 22288       | CakSNP22288    | <i>Kabuli</i>    | <i>Ca_Kabuli_denovo</i>      | 17844706                       | (T/C)       |
| 22289       | CakSNP22289    | <i>Kabuli</i>    | <i>Ca_Kabuli_denovo</i>      | 17846171                       | (C/T)       |
| 22290       | CakSNP22290    | <i>Kabuli</i>    | <i>Ca_Kabuli_denovo</i>      | 17846249                       | (A/G)       |
| 22291       | CakSNP22291    | <i>Kabuli</i>    | <i>Ca_Kabuli_denovo</i>      | 17846303                       | (C/T)       |
| 22292       | CakSNP22292    | <i>Kabuli</i>    | <i>Ca_Kabuli_denovo</i>      | 17848306                       | (T/C)       |
| 22293       | CakSNP22293    | <i>Kabuli</i>    | <i>Ca_Kabuli_denovo</i>      | 17852659                       | (G/A)       |
| 22294       | CakSNP22294    | <i>Kabuli</i>    | <i>Ca_Kabuli_denovo</i>      | 17863496                       | (T/C)       |
| 22295       | CakSNP22295    | <i>Kabuli</i>    | <i>Ca_Kabuli_denovo</i>      | 17863520                       | (G/C)       |
| 22296       | CakSNP22296    | <i>Kabuli</i>    | <i>Ca_Kabuli_denovo</i>      | 17864834                       | (C/G)       |
| 22297       | CakSNP22297    | <i>Kabuli</i>    | <i>Ca_Kabuli_denovo</i>      | 17865968                       | (T/C)       |
| 22298       | CakSNP22298    | <i>Kabuli</i>    | <i>Ca_Kabuli_denovo</i>      | 17866529                       | (C/G)       |
| 22299       | CakSNP22299    | <i>Kabuli</i>    | <i>Ca_Kabuli_denovo</i>      | 17870735                       | (G/A)       |
| 22300       | CakSNP22300    | <i>Kabuli</i>    | <i>Ca_Kabuli_denovo</i>      | 17870747                       | (A/G)       |
| 22301       | CakSNP22301    | <i>Kabuli</i>    | <i>Ca_Kabuli_denovo</i>      | 17871285                       | (G/A)       |
| 22302       | CakSNP22302    | <i>Kabuli</i>    | <i>Ca_Kabuli_denovo</i>      | 17871294                       | (C/T)       |
| 22303       | CakSNP22303    | <i>Kabuli</i>    | <i>Ca_Kabuli_denovo</i>      | 17872306                       | (A/C)       |
| 22304       | CakSNP22304    | <i>Kabuli</i>    | <i>Ca_Kabuli_denovo</i>      | 17872945                       | (A/T)       |
| 22305       | CakSNP22305    | <i>Kabuli</i>    | <i>Ca_Kabuli_denovo</i>      | 17872976                       | (A/G)       |
| 22306       | CakSNP22306    | <i>Kabuli</i>    | <i>Ca_Kabuli_denovo</i>      | 17884474                       | (T/G)       |

| <b>S.N.</b> | <b>SNP IDs</b> | <b>Cultivars</b> | <b>Chromosomes/scaffolds</b> | <b>Physical positions (bp)</b> | <b>SNPs</b> |
|-------------|----------------|------------------|------------------------------|--------------------------------|-------------|
| 22307       | CakSNP22307    | <i>Kabuli</i>    | <i>Ca_Kabuli_denovo</i>      | 17889232                       | (G/C)       |
| 22308       | CakSNP22308    | <i>Kabuli</i>    | <i>Ca_Kabuli_denovo</i>      | 17889257                       | (A/G)       |
| 22309       | CakSNP22309    | <i>Kabuli</i>    | <i>Ca_Kabuli_denovo</i>      | 17891779                       | (T/C)       |
| 22310       | CakSNP22310    | <i>Kabuli</i>    | <i>Ca_Kabuli_denovo</i>      | 17892202                       | (T/C)       |
| 22311       | CakSNP22311    | <i>Kabuli</i>    | <i>Ca_Kabuli_denovo</i>      | 17901128                       | (C/T)       |
| 22312       | CakSNP22312    | <i>Kabuli</i>    | <i>Ca_Kabuli_denovo</i>      | 17901641                       | (A/G)       |
| 22313       | CakSNP22313    | <i>Kabuli</i>    | <i>Ca_Kabuli_denovo</i>      | 17901648                       | (T/A)       |
| 22314       | CakSNP22314    | <i>Kabuli</i>    | <i>Ca_Kabuli_denovo</i>      | 17910343                       | (A/G)       |
| 22315       | CakSNP22315    | <i>Kabuli</i>    | <i>Ca_Kabuli_denovo</i>      | 17910397                       | (A/C)       |
| 22316       | CakSNP22316    | <i>Kabuli</i>    | <i>Ca_Kabuli_denovo</i>      | 17913667                       | (A/G)       |
| 22317       | CakSNP22317    | <i>Kabuli</i>    | <i>Ca_Kabuli_denovo</i>      | 17913745                       | (T/C)       |
| 22318       | CakSNP22318    | <i>Kabuli</i>    | <i>Ca_Kabuli_denovo</i>      | 17919055                       | (A/C)       |
| 22319       | CakSNP22319    | <i>Kabuli</i>    | <i>Ca_Kabuli_denovo</i>      | 17925237                       | (G/A)       |
| 22320       | CakSNP22320    | <i>Kabuli</i>    | <i>Ca_Kabuli_denovo</i>      | 17925240                       | (T/G)       |
| 22321       | CakSNP22321    | <i>Kabuli</i>    | <i>Ca_Kabuli_denovo</i>      | 17928555                       | (G/T)       |
| 22322       | CakSNP22322    | <i>Kabuli</i>    | <i>Ca_Kabuli_denovo</i>      | 17928573                       | (C/G)       |
| 22323       | CakSNP22323    | <i>Kabuli</i>    | <i>Ca_Kabuli_denovo</i>      | 17932364                       | (C/T)       |
| 22324       | CakSNP22324    | <i>Kabuli</i>    | <i>Ca_Kabuli_denovo</i>      | 17935615                       | (C/A)       |
| 22325       | CakSNP22325    | <i>Kabuli</i>    | <i>Ca_Kabuli_denovo</i>      | 17935649                       | (T/G)       |
| 22326       | CakSNP22326    | <i>Kabuli</i>    | <i>Ca_Kabuli_denovo</i>      | 17935692                       | (C/T)       |
| 22327       | CakSNP22327    | <i>Kabuli</i>    | <i>Ca_Kabuli_denovo</i>      | 17935701                       | (A/G)       |
| 22328       | CakSNP22328    | <i>Kabuli</i>    | <i>Ca_Kabuli_denovo</i>      | 17942231                       | (A/G)       |
| 22329       | CakSNP22329    | <i>Kabuli</i>    | <i>Ca_Kabuli_denovo</i>      | 17949666                       | (A/G)       |
| 22330       | CakSNP22330    | <i>Kabuli</i>    | <i>Ca_Kabuli_denovo</i>      | 17950774                       | (A/G)       |
| 22331       | CakSNP22331    | <i>Kabuli</i>    | <i>Ca_Kabuli_denovo</i>      | 17957321                       | (C/A)       |
| 22332       | CakSNP22332    | <i>Kabuli</i>    | <i>Ca_Kabuli_denovo</i>      | 17957334                       | (C/G)       |
| 22333       | CakSNP22333    | <i>Kabuli</i>    | <i>Ca_Kabuli_denovo</i>      | 17963997                       | (T/G)       |
| 22334       | CakSNP22334    | <i>Kabuli</i>    | <i>Ca_Kabuli_denovo</i>      | 17968728                       | (G/A)       |
| 22335       | CakSNP22335    | <i>Kabuli</i>    | <i>Ca_Kabuli_denovo</i>      | 17969758                       | (G/C)       |
| 22336       | CakSNP22336    | <i>Kabuli</i>    | <i>Ca_Kabuli_denovo</i>      | 17971133                       | (G/C)       |
| 22337       | CakSNP22337    | <i>Kabuli</i>    | <i>Ca_Kabuli_denovo</i>      | 17971802                       | (G/T)       |
| 22338       | CakSNP22338    | <i>Kabuli</i>    | <i>Ca_Kabuli_denovo</i>      | 17971807                       | (G/C)       |
| 22339       | CakSNP22339    | <i>Kabuli</i>    | <i>Ca_Kabuli_denovo</i>      | 17972205                       | (A/G)       |
| 22340       | CakSNP22340    | <i>Kabuli</i>    | <i>Ca_Kabuli_denovo</i>      | 17974116                       | (G/A)       |
| 22341       | CakSNP22341    | <i>Kabuli</i>    | <i>Ca_Kabuli_denovo</i>      | 17974129                       | (C/T)       |
| 22342       | CakSNP22342    | <i>Kabuli</i>    | <i>Ca_Kabuli_denovo</i>      | 17985164                       | (C/T)       |
| 22343       | CakSNP22343    | <i>Kabuli</i>    | <i>Ca_Kabuli_denovo</i>      | 17986886                       | (T/A)       |
| 22344       | CakSNP22344    | <i>Kabuli</i>    | <i>Ca_Kabuli_denovo</i>      | 17991233                       | (C/G)       |
| 22345       | CakSNP22345    | <i>Kabuli</i>    | <i>Ca_Kabuli_denovo</i>      | 17991279                       | (G/T)       |

| <b>S.N.</b> | <b>SNP IDs</b> | <b>Cultivars</b> | <b>Chromosomes/scaffolds</b> | <b>Physical positions (bp)</b> | <b>SNPs</b> |
|-------------|----------------|------------------|------------------------------|--------------------------------|-------------|
| 22346       | CakSNP22346    | <i>Kabuli</i>    | <i>Ca_Kabuli_denovo</i>      | 17999993                       | (A/G)       |
| 22347       | CakSNP22347    | <i>Kabuli</i>    | <i>Ca_Kabuli_denovo</i>      | 18000376                       | (T/C)       |
| 22348       | CakSNP22348    | <i>Kabuli</i>    | <i>Ca_Kabuli_denovo</i>      | 18009494                       | (G/A)       |
| 22349       | CakSNP22349    | <i>Kabuli</i>    | <i>Ca_Kabuli_denovo</i>      | 18009530                       | (G/A)       |
| 22350       | CakSNP22350    | <i>Kabuli</i>    | <i>Ca_Kabuli_denovo</i>      | 18015260                       | (C/T)       |
| 22351       | CakSNP22351    | <i>Kabuli</i>    | <i>Ca_Kabuli_denovo</i>      | 18015266                       | (T/C)       |
| 22352       | CakSNP22352    | <i>Kabuli</i>    | <i>Ca_Kabuli_denovo</i>      | 18019036                       | (G/T)       |
| 22353       | CakSNP22353    | <i>Kabuli</i>    | <i>Ca_Kabuli_denovo</i>      | 18019054                       | (G/C)       |
| 22354       | CakSNP22354    | <i>Kabuli</i>    | <i>Ca_Kabuli_denovo</i>      | 18021175                       | (A/C)       |
| 22355       | CakSNP22355    | <i>Kabuli</i>    | <i>Ca_Kabuli_denovo</i>      | 18021208                       | (C/T)       |
| 22356       | CakSNP22356    | <i>Kabuli</i>    | <i>Ca_Kabuli_denovo</i>      | 18022504                       | (A/G)       |
| 22357       | CakSNP22357    | <i>Kabuli</i>    | <i>Ca_Kabuli_denovo</i>      | 18030218                       | (A/G)       |
| 22358       | CakSNP22358    | <i>Kabuli</i>    | <i>Ca_Kabuli_denovo</i>      | 18030245                       | (G/C)       |
| 22359       | CakSNP22359    | <i>Kabuli</i>    | <i>Ca_Kabuli_denovo</i>      | 18045236                       | (A/G)       |
| 22360       | CakSNP22360    | <i>Kabuli</i>    | <i>Ca_Kabuli_denovo</i>      | 18045254                       | (G/C)       |
| 22361       | CakSNP22361    | <i>Kabuli</i>    | <i>Ca_Kabuli_denovo</i>      | 18049288                       | (A/G)       |
| 22362       | CakSNP22362    | <i>Kabuli</i>    | <i>Ca_Kabuli_denovo</i>      | 18057460                       | (A/G)       |
| 22363       | CakSNP22363    | <i>Kabuli</i>    | <i>Ca_Kabuli_denovo</i>      | 18057493                       | (A/G)       |
| 22364       | CakSNP22364    | <i>Kabuli</i>    | <i>Ca_Kabuli_denovo</i>      | 18062095                       | (T/C)       |
| 22365       | CakSNP22365    | <i>Kabuli</i>    | <i>Ca_Kabuli_denovo</i>      | 18062116                       | (C/T)       |
| 22366       | CakSNP22366    | <i>Kabuli</i>    | <i>Ca_Kabuli_denovo</i>      | 18063677                       | (T/G)       |
| 22367       | CakSNP22367    | <i>Kabuli</i>    | <i>Ca_Kabuli_denovo</i>      | 18065873                       | (T/G)       |
| 22368       | CakSNP22368    | <i>Kabuli</i>    | <i>Ca_Kabuli_denovo</i>      | 18073526                       | (A/C)       |
| 22369       | CakSNP22369    | <i>Kabuli</i>    | <i>Ca_Kabuli_denovo</i>      | 18073553                       | (C/T)       |
| 22370       | CakSNP22370    | <i>Kabuli</i>    | <i>Ca_Kabuli_denovo</i>      | 18075293                       | (G/C)       |
| 22371       | CakSNP22371    | <i>Kabuli</i>    | <i>Ca_Kabuli_denovo</i>      | 18078197                       | (G/A)       |
| 22372       | CakSNP22372    | <i>Kabuli</i>    | <i>Ca_Kabuli_denovo</i>      | 18078269                       | (C/T)       |
| 22373       | CakSNP22373    | <i>Kabuli</i>    | <i>Ca_Kabuli_denovo</i>      | 18085071                       | (C/T)       |
| 22374       | CakSNP22374    | <i>Kabuli</i>    | <i>Ca_Kabuli_denovo</i>      | 18086849                       | (A/C)       |
| 22375       | CakSNP22375    | <i>Kabuli</i>    | <i>Ca_Kabuli_denovo</i>      | 18095969                       | (C/T)       |
| 22376       | CakSNP22376    | <i>Kabuli</i>    | <i>Ca_Kabuli_denovo</i>      | 18096648                       | (T/C)       |
| 22377       | CakSNP22377    | <i>Kabuli</i>    | <i>Ca_Kabuli_denovo</i>      | 18100045                       | (T/C)       |
| 22378       | CakSNP22378    | <i>Kabuli</i>    | <i>Ca_Kabuli_denovo</i>      | 18100062                       | (G/C)       |
| 22379       | CakSNP22379    | <i>Kabuli</i>    | <i>Ca_Kabuli_denovo</i>      | 18109396                       | (C/A)       |
| 22380       | CakSNP22380    | <i>Kabuli</i>    | <i>Ca_Kabuli_denovo</i>      | 18109402                       | (T/C)       |
| 22381       | CakSNP22381    | <i>Kabuli</i>    | <i>Ca_Kabuli_denovo</i>      | 18111873                       | (G/A)       |
| 22382       | CakSNP22382    | <i>Kabuli</i>    | <i>Ca_Kabuli_denovo</i>      | 18111898                       | (C/T)       |
| 22383       | CakSNP22383    | <i>Kabuli</i>    | <i>Ca_Kabuli_denovo</i>      | 18113153                       | (C/A)       |
| 22384       | CakSNP22384    | <i>Kabuli</i>    | <i>Ca_Kabuli_denovo</i>      | 18113171                       | (G/A)       |

| <b>S.N.</b> | <b>SNP IDs</b> | <b>Cultivars</b> | <b>Chromosomes/scaffolds</b> | <b>Physical positions (bp)</b> | <b>SNPs</b> |
|-------------|----------------|------------------|------------------------------|--------------------------------|-------------|
| 22385       | CakSNP22385    | <i>Kabuli</i>    | <i>Ca_Kabuli_denovo</i>      | 18113367                       | (C/A)       |
| 22386       | CakSNP22386    | <i>Kabuli</i>    | <i>Ca_Kabuli_denovo</i>      | 18113809                       | (G/A)       |
| 22387       | CakSNP22387    | <i>Kabuli</i>    | <i>Ca_Kabuli_denovo</i>      | 18115789                       | (T/A)       |
| 22388       | CakSNP22388    | <i>Kabuli</i>    | <i>Ca_Kabuli_denovo</i>      | 18115810                       | (G/C)       |
| 22389       | CakSNP22389    | <i>Kabuli</i>    | <i>Ca_Kabuli_denovo</i>      | 18116597                       | (T/C)       |
| 22390       | CakSNP22390    | <i>Kabuli</i>    | <i>Ca_Kabuli_denovo</i>      | 18116666                       | (A/T)       |
| 22391       | CakSNP22391    | <i>Kabuli</i>    | <i>Ca_Kabuli_denovo</i>      | 18118195                       | (T/G)       |
| 22392       | CakSNP22392    | <i>Kabuli</i>    | <i>Ca_Kabuli_denovo</i>      | 18120678                       | (A/C)       |
| 22393       | CakSNP22393    | <i>Kabuli</i>    | <i>Ca_Kabuli_denovo</i>      | 18126053                       | (T/C)       |
| 22394       | CakSNP22394    | <i>Kabuli</i>    | <i>Ca_Kabuli_denovo</i>      | 18127484                       | (G/C)       |
| 22395       | CakSNP22395    | <i>Kabuli</i>    | <i>Ca_Kabuli_denovo</i>      | 18130665                       | (G/A)       |
| 22396       | CakSNP22396    | <i>Kabuli</i>    | <i>Ca_Kabuli_denovo</i>      | 18131139                       | (C/A)       |
| 22397       | CakSNP22397    | <i>Kabuli</i>    | <i>Ca_Kabuli_denovo</i>      | 18131168                       | (G/A)       |
| 22398       | CakSNP22398    | <i>Kabuli</i>    | <i>Ca_Kabuli_denovo</i>      | 18132154                       | (A/G)       |
| 22399       | CakSNP22399    | <i>Kabuli</i>    | <i>Ca_Kabuli_denovo</i>      | 18136870                       | (T/G)       |
| 22400       | CakSNP22400    | <i>Kabuli</i>    | <i>Ca_Kabuli_denovo</i>      | 18136875                       | (G/C)       |
| 22401       | CakSNP22401    | <i>Kabuli</i>    | <i>Ca_Kabuli_denovo</i>      | 18143261                       | (C/T)       |
| 22402       | CakSNP22402    | <i>Kabuli</i>    | <i>Ca_Kabuli_denovo</i>      | 18145646                       | (T/C)       |
| 22403       | CakSNP22403    | <i>Kabuli</i>    | <i>Ca_Kabuli_denovo</i>      | 18145676                       | (C/T)       |
| 22404       | CakSNP22404    | <i>Kabuli</i>    | <i>Ca_Kabuli_denovo</i>      | 18150116                       | (A/G)       |
| 22405       | CakSNP22405    | <i>Kabuli</i>    | <i>Ca_Kabuli_denovo</i>      | 18150140                       | (G/T)       |
| 22406       | CakSNP22406    | <i>Kabuli</i>    | <i>Ca_Kabuli_denovo</i>      | 18152696                       | (G/C)       |
| 22407       | CakSNP22407    | <i>Kabuli</i>    | <i>Ca_Kabuli_denovo</i>      | 18155798                       | (A/G)       |
| 22408       | CakSNP22408    | <i>Kabuli</i>    | <i>Ca_Kabuli_denovo</i>      | 18155801                       | (A/G)       |
| 22409       | CakSNP22409    | <i>Kabuli</i>    | <i>Ca_Kabuli_denovo</i>      | 18157850                       | (A/C)       |
| 22410       | CakSNP22410    | <i>Kabuli</i>    | <i>Ca_Kabuli_denovo</i>      | 18159030                       | (C/T)       |
| 22411       | CakSNP22411    | <i>Kabuli</i>    | <i>Ca_Kabuli_denovo</i>      | 18161129                       | (C/G)       |
| 22412       | CakSNP22412    | <i>Kabuli</i>    | <i>Ca_Kabuli_denovo</i>      | 18164824                       | (T/A)       |
| 22413       | CakSNP22413    | <i>Kabuli</i>    | <i>Ca_Kabuli_denovo</i>      | 18166118                       | (G/C)       |
| 22414       | CakSNP22414    | <i>Kabuli</i>    | <i>Ca_Kabuli_denovo</i>      | 18166365                       | (T/C)       |
| 22415       | CakSNP22415    | <i>Kabuli</i>    | <i>Ca_Kabuli_denovo</i>      | 18166405                       | (G/A)       |
| 22416       | CakSNP22416    | <i>Kabuli</i>    | <i>Ca_Kabuli_denovo</i>      | 18167705                       | (A/T)       |
| 22417       | CakSNP22417    | <i>Kabuli</i>    | <i>Ca_Kabuli_denovo</i>      | 18169954                       | (C/T)       |
| 22418       | CakSNP22418    | <i>Kabuli</i>    | <i>Ca_Kabuli_denovo</i>      | 18170385                       | (A/G)       |
| 22419       | CakSNP22419    | <i>Kabuli</i>    | <i>Ca_Kabuli_denovo</i>      | 18173531                       | (C/T)       |
| 22420       | CakSNP22420    | <i>Kabuli</i>    | <i>Ca_Kabuli_denovo</i>      | 18178644                       | (G/T)       |
| 22421       | CakSNP22421    | <i>Kabuli</i>    | <i>Ca_Kabuli_denovo</i>      | 18178846                       | (C/T)       |
| 22422       | CakSNP22422    | <i>Kabuli</i>    | <i>Ca_Kabuli_denovo</i>      | 18183712                       | (T/G)       |
| 22423       | CakSNP22423    | <i>Kabuli</i>    | <i>Ca_Kabuli_denovo</i>      | 18185898                       | (T/C)       |



| <b>S.N.</b> | <b>SNP IDs</b> | <b>Cultivars</b> | <b>Chromosomes/scaffolds</b> | <b>Physical positions (bp)</b> | <b>SNPs</b> |
|-------------|----------------|------------------|------------------------------|--------------------------------|-------------|
| 22424       | CakSNP22424    | <i>Kabuli</i>    | <i>Ca_Kabuli_denovo</i>      | 18185916                       | (A/G)       |
| 22425       | CakSNP22425    | <i>Kabuli</i>    | <i>Ca_Kabuli_denovo</i>      | 18196616                       | (T/C)       |
| 22426       | CakSNP22426    | <i>Kabuli</i>    | <i>Ca_Kabuli_denovo</i>      | 18196660                       | (G/C)       |
| 22427       | CakSNP22427    | <i>Kabuli</i>    | <i>Ca_Kabuli_denovo</i>      | 18199026                       | (C/T)       |
| 22428       | CakSNP22428    | <i>Kabuli</i>    | <i>Ca_Kabuli_denovo</i>      | 18209704                       | (G/A)       |
| 22429       | CakSNP22429    | <i>Kabuli</i>    | <i>Ca_Kabuli_denovo</i>      | 18209734                       | (A/C)       |
| 22430       | CakSNP22430    | <i>Kabuli</i>    | <i>Ca_Kabuli_denovo</i>      | 18214361                       | (T/C)       |
| 22431       | CakSNP22431    | <i>Kabuli</i>    | <i>Ca_Kabuli_denovo</i>      | 18214422                       | (A/C)       |
| 22432       | CakSNP22432    | <i>Kabuli</i>    | <i>Ca_Kabuli_denovo</i>      | 18214627                       | (C/G)       |
| 22433       | CakSNP22433    | <i>Kabuli</i>    | <i>Ca_Kabuli_denovo</i>      | 18214630                       | (C/T)       |
| 22434       | CakSNP22434    | <i>Kabuli</i>    | <i>Ca_Kabuli_denovo</i>      | 18215680                       | (A/T)       |
| 22435       | CakSNP22435    | <i>Kabuli</i>    | <i>Ca_Kabuli_denovo</i>      | 18215725                       | (G/A)       |
| 22436       | CakSNP22436    | <i>Kabuli</i>    | <i>Ca_Kabuli_denovo</i>      | 18225599                       | (A/G)       |
| 22437       | CakSNP22437    | <i>Kabuli</i>    | <i>Ca_Kabuli_denovo</i>      | 18225626                       | (G/A)       |
| 22438       | CakSNP22438    | <i>Kabuli</i>    | <i>Ca_Kabuli_denovo</i>      | 18226822                       | (C/T)       |
| 22439       | CakSNP22439    | <i>Kabuli</i>    | <i>Ca_Kabuli_denovo</i>      | 18229442                       | (C/A)       |
| 22440       | CakSNP22440    | <i>Kabuli</i>    | <i>Ca_Kabuli_denovo</i>      | 18232712                       | (C/T)       |
| 22441       | CakSNP22441    | <i>Kabuli</i>    | <i>Ca_Kabuli_denovo</i>      | 18232715                       | (A/G)       |
| 22442       | CakSNP22442    | <i>Kabuli</i>    | <i>Ca_Kabuli_denovo</i>      | 18240760                       | (G/C)       |
| 22443       | CakSNP22443    | <i>Kabuli</i>    | <i>Ca_Kabuli_denovo</i>      | 18240772                       | (C/T)       |
| 22444       | CakSNP22444    | <i>Kabuli</i>    | <i>Ca_Kabuli_denovo</i>      | 18244217                       | (G/C)       |
| 22445       | CakSNP22445    | <i>Kabuli</i>    | <i>Ca_Kabuli_denovo</i>      | 18244244                       | (A/G)       |
| 22446       | CakSNP22446    | <i>Kabuli</i>    | <i>Ca_Kabuli_denovo</i>      | 18249035                       | (G/T)       |
| 22447       | CakSNP22447    | <i>Kabuli</i>    | <i>Ca_Kabuli_denovo</i>      | 18254434                       | (C/G)       |
| 22448       | CakSNP22448    | <i>Kabuli</i>    | <i>Ca_Kabuli_denovo</i>      | 18254479                       | (A/G)       |
| 22449       | CakSNP22449    | <i>Kabuli</i>    | <i>Ca_Kabuli_denovo</i>      | 18255571                       | (T/C)       |
| 22450       | CakSNP22450    | <i>Kabuli</i>    | <i>Ca_Kabuli_denovo</i>      | 18255580                       | (G/T)       |
| 22451       | CakSNP22451    | <i>Kabuli</i>    | <i>Ca_Kabuli_denovo</i>      | 18255938                       | (T/C)       |
| 22452       | CakSNP22452    | <i>Kabuli</i>    | <i>Ca_Kabuli_denovo</i>      | 18259685                       | (T/C)       |
| 22453       | CakSNP22453    | <i>Kabuli</i>    | <i>Ca_Kabuli_denovo</i>      | 18259712                       | (G/C)       |
| 22454       | CakSNP22454    | <i>Kabuli</i>    | <i>Ca_Kabuli_denovo</i>      | 18260199                       | (G/A)       |
| 22455       | CakSNP22455    | <i>Kabuli</i>    | <i>Ca_Kabuli_denovo</i>      | 18260208                       | (A/C)       |
| 22456       | CakSNP22456    | <i>Kabuli</i>    | <i>Ca_Kabuli_denovo</i>      | 18268558                       | (T/G)       |
| 22457       | CakSNP22457    | <i>Kabuli</i>    | <i>Ca_Kabuli_denovo</i>      | 18268564                       | (T/C)       |
| 22458       | CakSNP22458    | <i>Kabuli</i>    | <i>Ca_Kabuli_denovo</i>      | 18269034                       | (A/G)       |
| 22459       | CakSNP22459    | <i>Kabuli</i>    | <i>Ca_Kabuli_denovo</i>      | 18270676                       | (T/C)       |
| 22460       | CakSNP22460    | <i>Kabuli</i>    | <i>Ca_Kabuli_denovo</i>      | 18270688                       | (T/G)       |
| 22461       | CakSNP22461    | <i>Kabuli</i>    | <i>Ca_Kabuli_denovo</i>      | 18270828                       | (G/A)       |
| 22462       | CakSNP22462    | <i>Kabuli</i>    | <i>Ca_Kabuli_denovo</i>      | 18270846                       | (C/G)       |

| <b>S.N.</b> | <b>SNP IDs</b> | <b>Cultivars</b> | <b>Chromosomes/scaffolds</b> | <b>Physical positions (bp)</b> | <b>SNPs</b> |
|-------------|----------------|------------------|------------------------------|--------------------------------|-------------|
| 22463       | CakSNP22463    | <i>Kabuli</i>    | <i>Ca_Kabuli_denovo</i>      | 18274147                       | (T/C)       |
| 22464       | CakSNP22464    | <i>Kabuli</i>    | <i>Ca_Kabuli_denovo</i>      | 18275905                       | (T/C)       |
| 22465       | CakSNP22465    | <i>Kabuli</i>    | <i>Ca_Kabuli_denovo</i>      | 18276932                       | (A/G)       |
| 22466       | CakSNP22466    | <i>Kabuli</i>    | <i>Ca_Kabuli_denovo</i>      | 18279539                       | (C/T)       |
| 22467       | CakSNP22467    | <i>Kabuli</i>    | <i>Ca_Kabuli_denovo</i>      | 18284434                       | (G/A)       |
| 22468       | CakSNP22468    | <i>Kabuli</i>    | <i>Ca_Kabuli_denovo</i>      | 18284503                       | (G/C)       |
| 22469       | CakSNP22469    | <i>Kabuli</i>    | <i>Ca_Kabuli_denovo</i>      | 18288645                       | (T/C)       |
| 22470       | CakSNP22470    | <i>Kabuli</i>    | <i>Ca_Kabuli_denovo</i>      | 18292460                       | (G/A)       |
| 22471       | CakSNP22471    | <i>Kabuli</i>    | <i>Ca_Kabuli_denovo</i>      | 18293034                       | (A/G)       |
| 22472       | CakSNP22472    | <i>Kabuli</i>    | <i>Ca_Kabuli_denovo</i>      | 18303244                       | (T/C)       |
| 22473       | CakSNP22473    | <i>Kabuli</i>    | <i>Ca_Kabuli_denovo</i>      | 18312877                       | (G/A)       |
| 22474       | CakSNP22474    | <i>Kabuli</i>    | <i>Ca_Kabuli_denovo</i>      | 18315388                       | (T/C)       |
| 22475       | CakSNP22475    | <i>Kabuli</i>    | <i>Ca_Kabuli_denovo</i>      | 18326563                       | (C/G)       |
| 22476       | CakSNP22476    | <i>Kabuli</i>    | <i>Ca_Kabuli_denovo</i>      | 18326575                       | (C/T)       |
| 22477       | CakSNP22477    | <i>Kabuli</i>    | <i>Ca_Kabuli_denovo</i>      | 18326977                       | (G/A)       |
| 22478       | CakSNP22478    | <i>Kabuli</i>    | <i>Ca_Kabuli_denovo</i>      | 18330217                       | (T/C)       |
| 22479       | CakSNP22479    | <i>Kabuli</i>    | <i>Ca_Kabuli_denovo</i>      | 18330247                       | (C/T)       |
| 22480       | CakSNP22480    | <i>Kabuli</i>    | <i>Ca_Kabuli_denovo</i>      | 18349380                       | (C/G)       |
| 22481       | CakSNP22481    | <i>Kabuli</i>    | <i>Ca_Kabuli_denovo</i>      | 18351620                       | (T/G)       |
| 22482       | CakSNP22482    | <i>Kabuli</i>    | <i>Ca_Kabuli_denovo</i>      | 18352549                       | (T/C)       |
| 22483       | CakSNP22483    | <i>Kabuli</i>    | <i>Ca_Kabuli_denovo</i>      | 18352558                       | (A/C)       |
| 22484       | CakSNP22484    | <i>Kabuli</i>    | <i>Ca_Kabuli_denovo</i>      | 18354146                       | (A/G)       |
| 22485       | CakSNP22485    | <i>Kabuli</i>    | <i>Ca_Kabuli_denovo</i>      | 18354163                       | (T/C)       |
| 22486       | CakSNP22486    | <i>Kabuli</i>    | <i>Ca_Kabuli_denovo</i>      | 18357472                       | (A/G)       |
| 22487       | CakSNP22487    | <i>Kabuli</i>    | <i>Ca_Kabuli_denovo</i>      | 18368995                       | (G/A)       |
| 22488       | CakSNP22488    | <i>Kabuli</i>    | <i>Ca_Kabuli_denovo</i>      | 18369476                       | (G/T)       |
| 22489       | CakSNP22489    | <i>Kabuli</i>    | <i>Ca_Kabuli_denovo</i>      | 18369482                       | (T/C)       |
| 22490       | CakSNP22490    | <i>Kabuli</i>    | <i>Ca_Kabuli_denovo</i>      | 18371972                       | (A/C)       |
| 22491       | CakSNP22491    | <i>Kabuli</i>    | <i>Ca_Kabuli_denovo</i>      | 18371974                       | (T/C)       |
| 22492       | CakSNP22492    | <i>Kabuli</i>    | <i>Ca_Kabuli_denovo</i>      | 18378184                       | (A/G)       |
| 22493       | CakSNP22493    | <i>Kabuli</i>    | <i>Ca_Kabuli_denovo</i>      | 18378189                       | (G/A)       |
| 22494       | CakSNP22494    | <i>Kabuli</i>    | <i>Ca_Kabuli_denovo</i>      | 18379267                       | (G/A)       |
| 22495       | CakSNP22495    | <i>Kabuli</i>    | <i>Ca_Kabuli_denovo</i>      | 18380355                       | (A/G)       |
| 22496       | CakSNP22496    | <i>Kabuli</i>    | <i>Ca_Kabuli_denovo</i>      | 18382345                       | (G/C)       |
| 22497       | CakSNP22497    | <i>Kabuli</i>    | <i>Ca_Kabuli_denovo</i>      | 18383189                       | (C/T)       |
| 22498       | CakSNP22498    | <i>Kabuli</i>    | <i>Ca_Kabuli_denovo</i>      | 18387158                       | (T/C)       |
| 22499       | CakSNP22499    | <i>Kabuli</i>    | <i>Ca_Kabuli_denovo</i>      | 18387172                       | (G/A)       |
| 22500       | CakSNP22500    | <i>Kabuli</i>    | <i>Ca_Kabuli_denovo</i>      | 18395703                       | (G/A)       |
| 22501       | CakSNP22501    | <i>Kabuli</i>    | <i>Ca_Kabuli_denovo</i>      | 18399965                       | (G/C)       |

| <b>S.N.</b> | <b>SNP IDs</b> | <b>Cultivars</b> | <b>Chromosomes/scaffolds</b> | <b>Physical positions (bp)</b> | <b>SNPs</b> |
|-------------|----------------|------------------|------------------------------|--------------------------------|-------------|
| 22502       | CakSNP22502    | <i>Kabuli</i>    | <i>Ca_Kabuli_denovo</i>      | 18399994                       | (T/C)       |
| 22503       | CakSNP22503    | <i>Kabuli</i>    | <i>Ca_Kabuli_denovo</i>      | 18400927                       | (G/C)       |
| 22504       | CakSNP22504    | <i>Kabuli</i>    | <i>Ca_Kabuli_denovo</i>      | 18400934                       | (G/A)       |
| 22505       | CakSNP22505    | <i>Kabuli</i>    | <i>Ca_Kabuli_denovo</i>      | 18411242                       | (T/C)       |
| 22506       | CakSNP22506    | <i>Kabuli</i>    | <i>Ca_Kabuli_denovo</i>      | 18411256                       | (G/A)       |
| 22507       | CakSNP22507    | <i>Kabuli</i>    | <i>Ca_Kabuli_denovo</i>      | 18416998                       | (G/C)       |
| 22508       | CakSNP22508    | <i>Kabuli</i>    | <i>Ca_Kabuli_denovo</i>      | 18416999                       | (C/G)       |
| 22509       | CakSNP22509    | <i>Kabuli</i>    | <i>Ca_Kabuli_denovo</i>      | 18417740                       | (C/G)       |
| 22510       | CakSNP22510    | <i>Kabuli</i>    | <i>Ca_Kabuli_denovo</i>      | 18417754                       | (T/C)       |
| 22511       | CakSNP22511    | <i>Kabuli</i>    | <i>Ca_Kabuli_denovo</i>      | 18423214                       | (C/T)       |
| 22512       | CakSNP22512    | <i>Kabuli</i>    | <i>Ca_Kabuli_denovo</i>      | 18423619                       | (C/T)       |
| 22513       | CakSNP22513    | <i>Kabuli</i>    | <i>Ca_Kabuli_denovo</i>      | 18423628                       | (T/C)       |
| 22514       | CakSNP22514    | <i>Kabuli</i>    | <i>Ca_Kabuli_denovo</i>      | 18423994                       | (G/A)       |
| 22515       | CakSNP22515    | <i>Kabuli</i>    | <i>Ca_Kabuli_denovo</i>      | 18428416                       | (G/T)       |
| 22516       | CakSNP22516    | <i>Kabuli</i>    | <i>Ca_Kabuli_denovo</i>      | 18429367                       | (T/G)       |
| 22517       | CakSNP22517    | <i>Kabuli</i>    | <i>Ca_Kabuli_denovo</i>      | 18429383                       | (A/G)       |
| 22518       | CakSNP22518    | <i>Kabuli</i>    | <i>Ca_Kabuli_denovo</i>      | 18432130                       | (T/C)       |
| 22519       | CakSNP22519    | <i>Kabuli</i>    | <i>Ca_Kabuli_denovo</i>      | 18432188                       | (T/C)       |
| 22520       | CakSNP22520    | <i>Kabuli</i>    | <i>Ca_Kabuli_denovo</i>      | 18437366                       | (C/A)       |
| 22521       | CakSNP22521    | <i>Kabuli</i>    | <i>Ca_Kabuli_denovo</i>      | 18438204                       | (A/G)       |
| 22522       | CakSNP22522    | <i>Kabuli</i>    | <i>Ca_Kabuli_denovo</i>      | 18440440                       | (G/A)       |
| 22523       | CakSNP22523    | <i>Kabuli</i>    | <i>Ca_Kabuli_denovo</i>      | 18451604                       | (G/A)       |
| 22524       | CakSNP22524    | <i>Kabuli</i>    | <i>Ca_Kabuli_denovo</i>      | 18451622                       | (C/A)       |
| 22525       | CakSNP22525    | <i>Kabuli</i>    | <i>Ca_Kabuli_denovo</i>      | 18455332                       | (G/A)       |
| 22526       | CakSNP22526    | <i>Kabuli</i>    | <i>Ca_Kabuli_denovo</i>      | 18455350                       | (C/A)       |
| 22527       | CakSNP22527    | <i>Kabuli</i>    | <i>Ca_Kabuli_denovo</i>      | 18455356                       | (T/C)       |
| 22528       | CakSNP22528    | <i>Kabuli</i>    | <i>Ca_Kabuli_denovo</i>      | 18459497                       | (C/G)       |
| 22529       | CakSNP22529    | <i>Kabuli</i>    | <i>Ca_Kabuli_denovo</i>      | 18462101                       | (A/C)       |
| 22530       | CakSNP22530    | <i>Kabuli</i>    | <i>Ca_Kabuli_denovo</i>      | 18464620                       | (A/G)       |
| 22531       | CakSNP22531    | <i>Kabuli</i>    | <i>Ca_Kabuli_denovo</i>      | 18464648                       | (G/A)       |
| 22532       | CakSNP22532    | <i>Kabuli</i>    | <i>Ca_Kabuli_denovo</i>      | 18466527                       | (G/C)       |
| 22533       | CakSNP22533    | <i>Kabuli</i>    | <i>Ca_Kabuli_denovo</i>      | 18466539                       | (T/C)       |
| 22534       | CakSNP22534    | <i>Kabuli</i>    | <i>Ca_Kabuli_denovo</i>      | 18469553                       | (G/T)       |
| 22535       | CakSNP22535    | <i>Kabuli</i>    | <i>Ca_Kabuli_denovo</i>      | 18470860                       | (T/C)       |
| 22536       | CakSNP22536    | <i>Kabuli</i>    | <i>Ca_Kabuli_denovo</i>      | 18474096                       | (A/G)       |
| 22537       | CakSNP22537    | <i>Kabuli</i>    | <i>Ca_Kabuli_denovo</i>      | 18476944                       | (T/G)       |
| 22538       | CakSNP22538    | <i>Kabuli</i>    | <i>Ca_Kabuli_denovo</i>      | 18477935                       | (A/G)       |
| 22539       | CakSNP22539    | <i>Kabuli</i>    | <i>Ca_Kabuli_denovo</i>      | 18479017                       | (G/C)       |
| 22540       | CakSNP22540    | <i>Kabuli</i>    | <i>Ca_Kabuli_denovo</i>      | 18484876                       | (C/T)       |

| <b>S.N.</b> | <b>SNP IDs</b> | <b>Cultivars</b> | <b>Chromosomes/scaffolds</b> | <b>Physical positions (bp)</b> | <b>SNPs</b> |
|-------------|----------------|------------------|------------------------------|--------------------------------|-------------|
| 22541       | CakSNP22541    | <i>Kabuli</i>    | <i>Ca_Kabuli_denovo</i>      | 18492425                       | (G/C)       |
| 22542       | CakSNP22542    | <i>Kabuli</i>    | <i>Ca_Kabuli_denovo</i>      | 18492458                       | (A/G)       |
| 22543       | CakSNP22543    | <i>Kabuli</i>    | <i>Ca_Kabuli_denovo</i>      | 18492911                       | (G/C)       |
| 22544       | CakSNP22544    | <i>Kabuli</i>    | <i>Ca_Kabuli_denovo</i>      | 18497528                       | (G/A)       |
| 22545       | CakSNP22545    | <i>Kabuli</i>    | <i>Ca_Kabuli_denovo</i>      | 18497537                       | (T/C)       |
| 22546       | CakSNP22546    | <i>Kabuli</i>    | <i>Ca_Kabuli_denovo</i>      | 18501632                       | (G/A)       |
| 22547       | CakSNP22547    | <i>Kabuli</i>    | <i>Ca_Kabuli_denovo</i>      | 18501638                       | (G/A)       |
| 22548       | CakSNP22548    | <i>Kabuli</i>    | <i>Ca_Kabuli_denovo</i>      | 18504613                       | (C/A)       |
| 22549       | CakSNP22549    | <i>Kabuli</i>    | <i>Ca_Kabuli_denovo</i>      | 18509084                       | (C/T)       |
| 22550       | CakSNP22550    | <i>Kabuli</i>    | <i>Ca_Kabuli_denovo</i>      | 18512044                       | (A/C)       |
| 22551       | CakSNP22551    | <i>Kabuli</i>    | <i>Ca_Kabuli_denovo</i>      | 18512047                       | (G/A)       |
| 22552       | CakSNP22552    | <i>Kabuli</i>    | <i>Ca_Kabuli_denovo</i>      | 18512138                       | (A/G)       |
| 22553       | CakSNP22553    | <i>Kabuli</i>    | <i>Ca_Kabuli_denovo</i>      | 18515042                       | (A/G)       |
| 22554       | CakSNP22554    | <i>Kabuli</i>    | <i>Ca_Kabuli_denovo</i>      | 18518254                       | (A/C)       |
| 22555       | CakSNP22555    | <i>Kabuli</i>    | <i>Ca_Kabuli_denovo</i>      | 18520034                       | (C/G)       |
| 22556       | CakSNP22556    | <i>Kabuli</i>    | <i>Ca_Kabuli_denovo</i>      | 18520055                       | (T/C)       |
| 22557       | CakSNP22557    | <i>Kabuli</i>    | <i>Ca_Kabuli_denovo</i>      | 18524435                       | (C/T)       |
| 22558       | CakSNP22558    | <i>Kabuli</i>    | <i>Ca_Kabuli_denovo</i>      | 18524445                       | (A/C)       |
| 22559       | CakSNP22559    | <i>Kabuli</i>    | <i>Ca_Kabuli_denovo</i>      | 18524597                       | (C/G)       |
| 22560       | CakSNP22560    | <i>Kabuli</i>    | <i>Ca_Kabuli_denovo</i>      | 18529410                       | (T/C)       |
| 22561       | CakSNP22561    | <i>Kabuli</i>    | <i>Ca_Kabuli_denovo</i>      | 18539598                       | (C/A)       |
| 22562       | CakSNP22562    | <i>Kabuli</i>    | <i>Ca_Kabuli_denovo</i>      | 18542780                       | (T/A)       |
| 22563       | CakSNP22563    | <i>Kabuli</i>    | <i>Ca_Kabuli_denovo</i>      | 18543466                       | (C/G)       |
| 22564       | CakSNP22564    | <i>Kabuli</i>    | <i>Ca_Kabuli_denovo</i>      | 18543550                       | (G/T)       |
| 22565       | CakSNP22565    | <i>Kabuli</i>    | <i>Ca_Kabuli_denovo</i>      | 18543835                       | (T/C)       |
| 22566       | CakSNP22566    | <i>Kabuli</i>    | <i>Ca_Kabuli_denovo</i>      | 18545659                       | (A/G)       |
| 22567       | CakSNP22567    | <i>Kabuli</i>    | <i>Ca_Kabuli_denovo</i>      | 18552228                       | (C/G)       |
| 22568       | CakSNP22568    | <i>Kabuli</i>    | <i>Ca_Kabuli_denovo</i>      | 18558448                       | (C/A)       |
| 22569       | CakSNP22569    | <i>Kabuli</i>    | <i>Ca_Kabuli_denovo</i>      | 18559193                       | (C/T)       |
| 22570       | CakSNP22570    | <i>Kabuli</i>    | <i>Ca_Kabuli_denovo</i>      | 18559231                       | (G/A)       |
| 22571       | CakSNP22571    | <i>Kabuli</i>    | <i>Ca_Kabuli_denovo</i>      | 18559927                       | (G/A)       |
| 22572       | CakSNP22572    | <i>Kabuli</i>    | <i>Ca_Kabuli_denovo</i>      | 18563930                       | (G/A)       |
| 22573       | CakSNP22573    | <i>Kabuli</i>    | <i>Ca_Kabuli_denovo</i>      | 18563978                       | (C/T)       |
| 22574       | CakSNP22574    | <i>Kabuli</i>    | <i>Ca_Kabuli_denovo</i>      | 18566071                       | (C/T)       |
| 22575       | CakSNP22575    | <i>Kabuli</i>    | <i>Ca_Kabuli_denovo</i>      | 18568152                       | (T/C)       |
| 22576       | CakSNP22576    | <i>Kabuli</i>    | <i>Ca_Kabuli_denovo</i>      | 18568157                       | (T/C)       |
| 22577       | CakSNP22577    | <i>Kabuli</i>    | <i>Ca_Kabuli_denovo</i>      | 18569485                       | (C/T)       |
| 22578       | CakSNP22578    | <i>Kabuli</i>    | <i>Ca_Kabuli_denovo</i>      | 18569488                       | (T/C)       |
| 22579       | CakSNP22579    | <i>Kabuli</i>    | <i>Ca_Kabuli_denovo</i>      | 18573632                       | (G/A)       |

| <b>S.N.</b> | <b>SNP IDs</b> | <b>Cultivars</b> | <b>Chromosomes/scaffolds</b> | <b>Physical positions (bp)</b> | <b>SNPs</b> |
|-------------|----------------|------------------|------------------------------|--------------------------------|-------------|
| 22580       | CakSNP22580    | <i>Kabuli</i>    | <i>Ca_Kabuli_denovo</i>      | 18579933                       | (C/T)       |
| 22581       | CakSNP22581    | <i>Kabuli</i>    | <i>Ca_Kabuli_denovo</i>      | 18581122                       | (A/C)       |
| 22582       | CakSNP22582    | <i>Kabuli</i>    | <i>Ca_Kabuli_denovo</i>      | 18586183                       | (G/T)       |
| 22583       | CakSNP22583    | <i>Kabuli</i>    | <i>Ca_Kabuli_denovo</i>      | 18586211                       | (A/G)       |
| 22584       | CakSNP22584    | <i>Kabuli</i>    | <i>Ca_Kabuli_denovo</i>      | 18587105                       | (C/T)       |
| 22585       | CakSNP22585    | <i>Kabuli</i>    | <i>Ca_Kabuli_denovo</i>      | 18589602                       | (T/C)       |
| 22586       | CakSNP22586    | <i>Kabuli</i>    | <i>Ca_Kabuli_denovo</i>      | 18591097                       | (A/G)       |
| 22587       | CakSNP22587    | <i>Kabuli</i>    | <i>Ca_Kabuli_denovo</i>      | 18592866                       | (C/G)       |
| 22588       | CakSNP22588    | <i>Kabuli</i>    | <i>Ca_Kabuli_denovo</i>      | 18592869                       | (C/T)       |
| 22589       | CakSNP22589    | <i>Kabuli</i>    | <i>Ca_Kabuli_denovo</i>      | 18596290                       | (T/C)       |
| 22590       | CakSNP22590    | <i>Kabuli</i>    | <i>Ca_Kabuli_denovo</i>      | 18596296                       | (T/G)       |
| 22591       | CakSNP22591    | <i>Kabuli</i>    | <i>Ca_Kabuli_denovo</i>      | 18597427                       | (G/A)       |
| 22592       | CakSNP22592    | <i>Kabuli</i>    | <i>Ca_Kabuli_denovo</i>      | 18597485                       | (C/T)       |
| 22593       | CakSNP22593    | <i>Kabuli</i>    | <i>Ca_Kabuli_denovo</i>      | 18598249                       | (C/G)       |
| 22594       | CakSNP22594    | <i>Kabuli</i>    | <i>Ca_Kabuli_denovo</i>      | 18606359                       | (C/A)       |
| 22595       | CakSNP22595    | <i>Kabuli</i>    | <i>Ca_Kabuli_denovo</i>      | 18608180                       | (G/A)       |
| 22596       | CakSNP22596    | <i>Kabuli</i>    | <i>Ca_Kabuli_denovo</i>      | 18608195                       | (T/C)       |
| 22597       | CakSNP22597    | <i>Kabuli</i>    | <i>Ca_Kabuli_denovo</i>      | 18614037                       | (T/C)       |
| 22598       | CakSNP22598    | <i>Kabuli</i>    | <i>Ca_Kabuli_denovo</i>      | 18618464                       | (A/G)       |
| 22599       | CakSNP22599    | <i>Kabuli</i>    | <i>Ca_Kabuli_denovo</i>      | 18620233                       | (T/C)       |
| 22600       | CakSNP22600    | <i>Kabuli</i>    | <i>Ca_Kabuli_denovo</i>      | 18623050                       | (G/A)       |
| 22601       | CakSNP22601    | <i>Kabuli</i>    | <i>Ca_Kabuli_denovo</i>      | 18623064                       | (G/A)       |
| 22602       | CakSNP22602    | <i>Kabuli</i>    | <i>Ca_Kabuli_denovo</i>      | 18623808                       | (T/C)       |
| 22603       | CakSNP22603    | <i>Kabuli</i>    | <i>Ca_Kabuli_denovo</i>      | 18624662                       | (G/A)       |
| 22604       | CakSNP22604    | <i>Kabuli</i>    | <i>Ca_Kabuli_denovo</i>      | 18624688                       | (T/C)       |
| 22605       | CakSNP22605    | <i>Kabuli</i>    | <i>Ca_Kabuli_denovo</i>      | 18627935                       | (A/G)       |
| 22606       | CakSNP22606    | <i>Kabuli</i>    | <i>Ca_Kabuli_denovo</i>      | 18632591                       | (A/C)       |
| 22607       | CakSNP22607    | <i>Kabuli</i>    | <i>Ca_Kabuli_denovo</i>      | 18633248                       | (G/A)       |
| 22608       | CakSNP22608    | <i>Kabuli</i>    | <i>Ca_Kabuli_denovo</i>      | 18639938                       | (A/G)       |
| 22609       | CakSNP22609    | <i>Kabuli</i>    | <i>Ca_Kabuli_denovo</i>      | 18641122                       | (C/G)       |
| 22610       | CakSNP22610    | <i>Kabuli</i>    | <i>Ca_Kabuli_denovo</i>      | 18641197                       | (C/G)       |
| 22611       | CakSNP22611    | <i>Kabuli</i>    | <i>Ca_Kabuli_denovo</i>      | 18645319                       | (C/T)       |
| 22612       | CakSNP22612    | <i>Kabuli</i>    | <i>Ca_Kabuli_denovo</i>      | 18646865                       | (T/C)       |
| 22613       | CakSNP22613    | <i>Kabuli</i>    | <i>Ca_Kabuli_denovo</i>      | 18650506                       | (G/A)       |
| 22614       | CakSNP22614    | <i>Kabuli</i>    | <i>Ca_Kabuli_denovo</i>      | 18651436                       | (C/A)       |
| 22615       | CakSNP22615    | <i>Kabuli</i>    | <i>Ca_Kabuli_denovo</i>      | 18651511                       | (T/C)       |
| 22616       | CakSNP22616    | <i>Kabuli</i>    | <i>Ca_Kabuli_denovo</i>      | 18663629                       | (G/A)       |
| 22617       | CakSNP22617    | <i>Kabuli</i>    | <i>Ca_Kabuli_denovo</i>      | 18663648                       | (T/A)       |
| 22618       | CakSNP22618    | <i>Kabuli</i>    | <i>Ca_Kabuli_denovo</i>      | 18670780                       | (T/G)       |

| <b>S.N.</b> | <b>SNP IDs</b> | <b>Cultivars</b> | <b>Chromosomes/scaffolds</b> | <b>Physical positions (bp)</b> | <b>SNPs</b> |
|-------------|----------------|------------------|------------------------------|--------------------------------|-------------|
| 22619       | CakSNP22619    | <i>Kabuli</i>    | <i>Ca_Kabuli_denovo</i>      | 18671340                       | (T/C)       |
| 22620       | CakSNP22620    | <i>Kabuli</i>    | <i>Ca_Kabuli_denovo</i>      | 18671551                       | (A/G)       |
| 22621       | CakSNP22621    | <i>Kabuli</i>    | <i>Ca_Kabuli_denovo</i>      | 18671557                       | (G/C)       |
| 22622       | CakSNP22622    | <i>Kabuli</i>    | <i>Ca_Kabuli_denovo</i>      | 18675353                       | (A/G)       |
| 22623       | CakSNP22623    | <i>Kabuli</i>    | <i>Ca_Kabuli_denovo</i>      | 18675369                       | (G/C)       |
| 22624       | CakSNP22624    | <i>Kabuli</i>    | <i>Ca_Kabuli_denovo</i>      | 18676288                       | (G/A)       |
| 22625       | CakSNP22625    | <i>Kabuli</i>    | <i>Ca_Kabuli_denovo</i>      | 18676421                       | (T/C)       |
| 22626       | CakSNP22626    | <i>Kabuli</i>    | <i>Ca_Kabuli_denovo</i>      | 18676427                       | (T/C)       |
| 22627       | CakSNP22627    | <i>Kabuli</i>    | <i>Ca_Kabuli_denovo</i>      | 18678872                       | (A/G)       |
| 22628       | CakSNP22628    | <i>Kabuli</i>    | <i>Ca_Kabuli_denovo</i>      | 18680021                       | (C/T)       |
| 22629       | CakSNP22629    | <i>Kabuli</i>    | <i>Ca_Kabuli_denovo</i>      | 18680071                       | (C/A)       |
| 22630       | CakSNP22630    | <i>Kabuli</i>    | <i>Ca_Kabuli_denovo</i>      | 18680107                       | (A/C)       |
| 22631       | CakSNP22631    | <i>Kabuli</i>    | <i>Ca_Kabuli_denovo</i>      | 18685944                       | (A/C)       |
| 22632       | CakSNP22632    | <i>Kabuli</i>    | <i>Ca_Kabuli_denovo</i>      | 18690041                       | (C/A)       |
| 22633       | CakSNP22633    | <i>Kabuli</i>    | <i>Ca_Kabuli_denovo</i>      | 18690059                       | (A/T)       |
| 22634       | CakSNP22634    | <i>Kabuli</i>    | <i>Ca_Kabuli_denovo</i>      | 18696550                       | (C/T)       |
| 22635       | CakSNP22635    | <i>Kabuli</i>    | <i>Ca_Kabuli_denovo</i>      | 18696580                       | (G/A)       |
| 22636       | CakSNP22636    | <i>Kabuli</i>    | <i>Ca_Kabuli_denovo</i>      | 18700033                       | (G/C)       |
| 22637       | CakSNP22637    | <i>Kabuli</i>    | <i>Ca_Kabuli_denovo</i>      | 18704924                       | (A/C)       |
| 22638       | CakSNP22638    | <i>Kabuli</i>    | <i>Ca_Kabuli_denovo</i>      | 18705814                       | (A/C)       |
| 22639       | CakSNP22639    | <i>Kabuli</i>    | <i>Ca_Kabuli_denovo</i>      | 18712035                       | (G/T)       |
| 22640       | CakSNP22640    | <i>Kabuli</i>    | <i>Ca_Kabuli_denovo</i>      | 18713763                       | (A/T)       |
| 22641       | CakSNP22641    | <i>Kabuli</i>    | <i>Ca_Kabuli_denovo</i>      | 18713777                       | (G/A)       |
| 22642       | CakSNP22642    | <i>Kabuli</i>    | <i>Ca_Kabuli_denovo</i>      | 18713783                       | (T/C)       |
| 22643       | CakSNP22643    | <i>Kabuli</i>    | <i>Ca_Kabuli_denovo</i>      | 18716914                       | (A/G)       |
| 22644       | CakSNP22644    | <i>Kabuli</i>    | <i>Ca_Kabuli_denovo</i>      | 18722230                       | (G/T)       |
| 22645       | CakSNP22645    | <i>Kabuli</i>    | <i>Ca_Kabuli_denovo</i>      | 18724934                       | (G/A)       |
| 22646       | CakSNP22646    | <i>Kabuli</i>    | <i>Ca_Kabuli_denovo</i>      | 18726509                       | (A/G)       |
| 22647       | CakSNP22647    | <i>Kabuli</i>    | <i>Ca_Kabuli_denovo</i>      | 18727704                       | (A/G)       |
| 22648       | CakSNP22648    | <i>Kabuli</i>    | <i>Ca_Kabuli_denovo</i>      | 18727738                       | (G/C)       |
| 22649       | CakSNP22649    | <i>Kabuli</i>    | <i>Ca_Kabuli_denovo</i>      | 18728749                       | (T/G)       |
| 22650       | CakSNP22650    | <i>Kabuli</i>    | <i>Ca_Kabuli_denovo</i>      | 18728774                       | (T/G)       |
| 22651       | CakSNP22651    | <i>Kabuli</i>    | <i>Ca_Kabuli_denovo</i>      | 18733070                       | (C/T)       |
| 22652       | CakSNP22652    | <i>Kabuli</i>    | <i>Ca_Kabuli_denovo</i>      | 18733079                       | (C/G)       |
| 22653       | CakSNP22653    | <i>Kabuli</i>    | <i>Ca_Kabuli_denovo</i>      | 18739407                       | (A/C)       |
| 22654       | CakSNP22654    | <i>Kabuli</i>    | <i>Ca_Kabuli_denovo</i>      | 18739408                       | (A/G)       |
| 22655       | CakSNP22655    | <i>Kabuli</i>    | <i>Ca_Kabuli_denovo</i>      | 18747163                       | (G/A)       |
| 22656       | CakSNP22656    | <i>Kabuli</i>    | <i>Ca_Kabuli_denovo</i>      | 18748718                       | (C/A)       |
| 22657       | CakSNP22657    | <i>Kabuli</i>    | <i>Ca_Kabuli_denovo</i>      | 18748786                       | (T/C)       |

| <b>S.N.</b> | <b>SNP IDs</b> | <b>Cultivars</b> | <b>Chromosomes/scaffolds</b> | <b>Physical positions (bp)</b> | <b>SNPs</b> |
|-------------|----------------|------------------|------------------------------|--------------------------------|-------------|
| 22658       | CakSNP22658    | <i>Kabuli</i>    | <i>Ca_Kabuli_denovo</i>      | 18753052                       | (A/G)       |
| 22659       | CakSNP22659    | <i>Kabuli</i>    | <i>Ca_Kabuli_denovo</i>      | 18756362                       | (C/T)       |
| 22660       | CakSNP22660    | <i>Kabuli</i>    | <i>Ca_Kabuli_denovo</i>      | 18762726                       | (G/A)       |
| 22661       | CakSNP22661    | <i>Kabuli</i>    | <i>Ca_Kabuli_denovo</i>      | 18762744                       | (C/A)       |
| 22662       | CakSNP22662    | <i>Kabuli</i>    | <i>Ca_Kabuli_denovo</i>      | 18763792                       | (G/T)       |
| 22663       | CakSNP22663    | <i>Kabuli</i>    | <i>Ca_Kabuli_denovo</i>      | 18770479                       | (C/T)       |
| 22664       | CakSNP22664    | <i>Kabuli</i>    | <i>Ca_Kabuli_denovo</i>      | 18770536                       | (T/C)       |
| 22665       | CakSNP22665    | <i>Kabuli</i>    | <i>Ca_Kabuli_denovo</i>      | 18770586                       | (C/T)       |
| 22666       | CakSNP22666    | <i>Kabuli</i>    | <i>Ca_Kabuli_denovo</i>      | 18773521                       | (G/A)       |
| 22667       | CakSNP22667    | <i>Kabuli</i>    | <i>Ca_Kabuli_denovo</i>      | 18775835                       | (T/C)       |
| 22668       | CakSNP22668    | <i>Kabuli</i>    | <i>Ca_Kabuli_denovo</i>      | 18775837                       | (A/G)       |
| 22669       | CakSNP22669    | <i>Kabuli</i>    | <i>Ca_Kabuli_denovo</i>      | 18777081                       | (C/G)       |
| 22670       | CakSNP22670    | <i>Kabuli</i>    | <i>Ca_Kabuli_denovo</i>      | 18787985                       | (C/G)       |
| 22671       | CakSNP22671    | <i>Kabuli</i>    | <i>Ca_Kabuli_denovo</i>      | 18788003                       | (T/C)       |
| 22672       | CakSNP22672    | <i>Kabuli</i>    | <i>Ca_Kabuli_denovo</i>      | 18790370                       | (A/C)       |
| 22673       | CakSNP22673    | <i>Kabuli</i>    | <i>Ca_Kabuli_denovo</i>      | 18791098                       | (C/T)       |
| 22674       | CakSNP22674    | <i>Kabuli</i>    | <i>Ca_Kabuli_denovo</i>      | 18791101                       | (C/A)       |
| 22675       | CakSNP22675    | <i>Kabuli</i>    | <i>Ca_Kabuli_denovo</i>      | 18793121                       | (T/C)       |
| 22676       | CakSNP22676    | <i>Kabuli</i>    | <i>Ca_Kabuli_denovo</i>      | 18803897                       | (A/G)       |
| 22677       | CakSNP22677    | <i>Kabuli</i>    | <i>Ca_Kabuli_denovo</i>      | 18803935                       | (G/C)       |
| 22678       | CakSNP22678    | <i>Kabuli</i>    | <i>Ca_Kabuli_denovo</i>      | 18806483                       | (C/T)       |
| 22679       | CakSNP22679    | <i>Kabuli</i>    | <i>Ca_Kabuli_denovo</i>      | 18808206                       | (T/G)       |
| 22680       | CakSNP22680    | <i>Kabuli</i>    | <i>Ca_Kabuli_denovo</i>      | 18808227                       | (T/G)       |
| 22681       | CakSNP22681    | <i>Kabuli</i>    | <i>Ca_Kabuli_denovo</i>      | 18809542                       | (C/T)       |
| 22682       | CakSNP22682    | <i>Kabuli</i>    | <i>Ca_Kabuli_denovo</i>      | 18812003                       | (G/T)       |
| 22683       | CakSNP22683    | <i>Kabuli</i>    | <i>Ca_Kabuli_denovo</i>      | 18813549                       | (G/A)       |
| 22684       | CakSNP22684    | <i>Kabuli</i>    | <i>Ca_Kabuli_denovo</i>      | 18814122                       | (G/A)       |
| 22685       | CakSNP22685    | <i>Kabuli</i>    | <i>Ca_Kabuli_denovo</i>      | 18816705                       | (T/C)       |
| 22686       | CakSNP22686    | <i>Kabuli</i>    | <i>Ca_Kabuli_denovo</i>      | 18816713                       | (G/A)       |
| 22687       | CakSNP22687    | <i>Kabuli</i>    | <i>Ca_Kabuli_denovo</i>      | 18828492                       | (G/A)       |
| 22688       | CakSNP22688    | <i>Kabuli</i>    | <i>Ca_Kabuli_denovo</i>      | 18829915                       | (C/A)       |
| 22689       | CakSNP22689    | <i>Kabuli</i>    | <i>Ca_Kabuli_denovo</i>      | 18829924                       | (A/G)       |
| 22690       | CakSNP22690    | <i>Kabuli</i>    | <i>Ca_Kabuli_denovo</i>      | 18832361                       | (G/T)       |
| 22691       | CakSNP22691    | <i>Kabuli</i>    | <i>Ca_Kabuli_denovo</i>      | 18832368                       | (G/C)       |
| 22692       | CakSNP22692    | <i>Kabuli</i>    | <i>Ca_Kabuli_denovo</i>      | 18834096                       | (C/G)       |
| 22693       | CakSNP22693    | <i>Kabuli</i>    | <i>Ca_Kabuli_denovo</i>      | 18835613                       | (T/C)       |
| 22694       | CakSNP22694    | <i>Kabuli</i>    | <i>Ca_Kabuli_denovo</i>      | 18836177                       | (C/T)       |
| 22695       | CakSNP22695    | <i>Kabuli</i>    | <i>Ca_Kabuli_denovo</i>      | 18841637                       | (A/G)       |
| 22696       | CakSNP22696    | <i>Kabuli</i>    | <i>Ca_Kabuli_denovo</i>      | 18841640                       | (T/G)       |

| <b>S.N.</b> | <b>SNP IDs</b> | <b>Cultivars</b> | <b>Chromosomes/scaffolds</b> | <b>Physical positions (bp)</b> | <b>SNPs</b> |
|-------------|----------------|------------------|------------------------------|--------------------------------|-------------|
| 22697       | CakSNP22697    | <i>Kabuli</i>    | <i>Ca_Kabuli_denovo</i>      | 18849251                       | (G/A)       |
| 22698       | CakSNP22698    | <i>Kabuli</i>    | <i>Ca_Kabuli_denovo</i>      | 18850197                       | (A/G)       |
| 22699       | CakSNP22699    | <i>Kabuli</i>    | <i>Ca_Kabuli_denovo</i>      | 18850203                       | (C/T)       |
| 22700       | CakSNP22700    | <i>Kabuli</i>    | <i>Ca_Kabuli_denovo</i>      | 18850655                       | (G/A)       |
| 22701       | CakSNP22701    | <i>Kabuli</i>    | <i>Ca_Kabuli_denovo</i>      | 18850691                       | (G/C)       |
| 22702       | CakSNP22702    | <i>Kabuli</i>    | <i>Ca_Kabuli_denovo</i>      | 18852209                       | (A/G)       |
| 22703       | CakSNP22703    | <i>Kabuli</i>    | <i>Ca_Kabuli_denovo</i>      | 18852950                       | (A/G)       |
| 22704       | CakSNP22704    | <i>Kabuli</i>    | <i>Ca_Kabuli_denovo</i>      | 18856357                       | (T/C)       |
| 22705       | CakSNP22705    | <i>Kabuli</i>    | <i>Ca_Kabuli_denovo</i>      | 18857764                       | (C/T)       |
| 22706       | CakSNP22706    | <i>Kabuli</i>    | <i>Ca_Kabuli_denovo</i>      | 18857773                       | (T/C)       |
| 22707       | CakSNP22707    | <i>Kabuli</i>    | <i>Ca_Kabuli_denovo</i>      | 18860305                       | (A/G)       |
| 22708       | CakSNP22708    | <i>Kabuli</i>    | <i>Ca_Kabuli_denovo</i>      | 18867206                       | (A/G)       |
| 22709       | CakSNP22709    | <i>Kabuli</i>    | <i>Ca_Kabuli_denovo</i>      | 18869392                       | (G/A)       |
| 22710       | CakSNP22710    | <i>Kabuli</i>    | <i>Ca_Kabuli_denovo</i>      | 18869409                       | (A/C)       |
| 22711       | CakSNP22711    | <i>Kabuli</i>    | <i>Ca_Kabuli_denovo</i>      | 18872425                       | (C/T)       |
| 22712       | CakSNP22712    | <i>Kabuli</i>    | <i>Ca_Kabuli_denovo</i>      | 18872431                       | (T/C)       |
| 22713       | CakSNP22713    | <i>Kabuli</i>    | <i>Ca_Kabuli_denovo</i>      | 18872443                       | (T/C)       |
| 22714       | CakSNP22714    | <i>Kabuli</i>    | <i>Ca_Kabuli_denovo</i>      | 18873043                       | (G/A)       |
| 22715       | CakSNP22715    | <i>Kabuli</i>    | <i>Ca_Kabuli_denovo</i>      | 18873726                       | (T/C)       |
| 22716       | CakSNP22716    | <i>Kabuli</i>    | <i>Ca_Kabuli_denovo</i>      | 18873766                       | (G/A)       |
| 22717       | CakSNP22717    | <i>Kabuli</i>    | <i>Ca_Kabuli_denovo</i>      | 18878910                       | (T/A)       |
| 22718       | CakSNP22718    | <i>Kabuli</i>    | <i>Ca_Kabuli_denovo</i>      | 18879388                       | (G/T)       |
| 22719       | CakSNP22719    | <i>Kabuli</i>    | <i>Ca_Kabuli_denovo</i>      | 18880593                       | (T/C)       |
| 22720       | CakSNP22720    | <i>Kabuli</i>    | <i>Ca_Kabuli_denovo</i>      | 18881435                       | (T/G)       |
| 22721       | CakSNP22721    | <i>Kabuli</i>    | <i>Ca_Kabuli_denovo</i>      | 18882519                       | (T/C)       |
| 22722       | CakSNP22722    | <i>Kabuli</i>    | <i>Ca_Kabuli_denovo</i>      | 18891748                       | (T/G)       |
| 22723       | CakSNP22723    | <i>Kabuli</i>    | <i>Ca_Kabuli_denovo</i>      | 18891754                       | (T/C)       |
| 22724       | CakSNP22724    | <i>Kabuli</i>    | <i>Ca_Kabuli_denovo</i>      | 18892953                       | (A/T)       |
| 22725       | CakSNP22725    | <i>Kabuli</i>    | <i>Ca_Kabuli_denovo</i>      | 18896152                       | (A/G)       |
| 22726       | CakSNP22726    | <i>Kabuli</i>    | <i>Ca_Kabuli_denovo</i>      | 18898353                       | (C/A)       |
| 22727       | CakSNP22727    | <i>Kabuli</i>    | <i>Ca_Kabuli_denovo</i>      | 18898800                       | (C/T)       |
| 22728       | CakSNP22728    | <i>Kabuli</i>    | <i>Ca_Kabuli_denovo</i>      | 18899861                       | (A/G)       |
| 22729       | CakSNP22729    | <i>Kabuli</i>    | <i>Ca_Kabuli_denovo</i>      | 18899909                       | (C/G)       |
| 22730       | CakSNP22730    | <i>Kabuli</i>    | <i>Ca_Kabuli_denovo</i>      | 18900482                       | (A/C)       |
| 22731       | CakSNP22731    | <i>Kabuli</i>    | <i>Ca_Kabuli_denovo</i>      | 18900483                       | (G/T)       |
| 22732       | CakSNP22732    | <i>Kabuli</i>    | <i>Ca_Kabuli_denovo</i>      | 18900484                       | (A/G)       |
| 22733       | CakSNP22733    | <i>Kabuli</i>    | <i>Ca_Kabuli_denovo</i>      | 18905479                       | (G/A)       |
| 22734       | CakSNP22734    | <i>Kabuli</i>    | <i>Ca_Kabuli_denovo</i>      | 18911372                       | (C/G)       |
| 22735       | CakSNP22735    | <i>Kabuli</i>    | <i>Ca_Kabuli_denovo</i>      | 18911381                       | (A/G)       |



| <b>S.N.</b> | <b>SNP IDs</b> | <b>Cultivars</b> | <b>Chromosomes/scaffolds</b> | <b>Physical positions (bp)</b> | <b>SNPs</b> |
|-------------|----------------|------------------|------------------------------|--------------------------------|-------------|
| 22736       | CakSNP22736    | <i>Kabuli</i>    | <i>Ca_Kabuli_denovo</i>      | 18924368                       | (C/A)       |
| 22737       | CakSNP22737    | <i>Kabuli</i>    | <i>Ca_Kabuli_denovo</i>      | 18927874                       | (G/C)       |
| 22738       | CakSNP22738    | <i>Kabuli</i>    | <i>Ca_Kabuli_denovo</i>      | 18930752                       | (A/G)       |
| 22739       | CakSNP22739    | <i>Kabuli</i>    | <i>Ca_Kabuli_denovo</i>      | 18930761                       | (T/C)       |
| 22740       | CakSNP22740    | <i>Kabuli</i>    | <i>Ca_Kabuli_denovo</i>      | 18930885                       | (A/G)       |
| 22741       | CakSNP22741    | <i>Kabuli</i>    | <i>Ca_Kabuli_denovo</i>      | 18930894                       | (A/G)       |
| 22742       | CakSNP22742    | <i>Kabuli</i>    | <i>Ca_Kabuli_denovo</i>      | 18934921                       | (C/T)       |
| 22743       | CakSNP22743    | <i>Kabuli</i>    | <i>Ca_Kabuli_denovo</i>      | 18934964                       | (C/T)       |
| 22744       | CakSNP22744    | <i>Kabuli</i>    | <i>Ca_Kabuli_denovo</i>      | 18935278                       | (C/T)       |
| 22745       | CakSNP22745    | <i>Kabuli</i>    | <i>Ca_Kabuli_denovo</i>      | 18938911                       | (G/A)       |
| 22746       | CakSNP22746    | <i>Kabuli</i>    | <i>Ca_Kabuli_denovo</i>      | 18938964                       | (G/C)       |
| 22747       | CakSNP22747    | <i>Kabuli</i>    | <i>Ca_Kabuli_denovo</i>      | 18940227                       | (G/C)       |
| 22748       | CakSNP22748    | <i>Kabuli</i>    | <i>Ca_Kabuli_denovo</i>      | 18949813                       | (C/T)       |
| 22749       | CakSNP22749    | <i>Kabuli</i>    | <i>Ca_Kabuli_denovo</i>      | 18951660                       | (G/C)       |
| 22750       | CakSNP22750    | <i>Kabuli</i>    | <i>Ca_Kabuli_denovo</i>      | 18951699                       | (G/C)       |
| 22751       | CakSNP22751    | <i>Kabuli</i>    | <i>Ca_Kabuli_denovo</i>      | 18951736                       | (A/G)       |
| 22752       | CakSNP22752    | <i>Kabuli</i>    | <i>Ca_Kabuli_denovo</i>      | 18951760                       | (A/G)       |
| 22753       | CakSNP22753    | <i>Kabuli</i>    | <i>Ca_Kabuli_denovo</i>      | 18968953                       | (G/C)       |
| 22754       | CakSNP22754    | <i>Kabuli</i>    | <i>Ca_Kabuli_denovo</i>      | 18969406                       | (A/G)       |
| 22755       | CakSNP22755    | <i>Kabuli</i>    | <i>Ca_Kabuli_denovo</i>      | 18969451                       | (A/G)       |
| 22756       | CakSNP22756    | <i>Kabuli</i>    | <i>Ca_Kabuli_denovo</i>      | 18975086                       | (G/A)       |
| 22757       | CakSNP22757    | <i>Kabuli</i>    | <i>Ca_Kabuli_denovo</i>      | 18975094                       | (T/C)       |
| 22758       | CakSNP22758    | <i>Kabuli</i>    | <i>Ca_Kabuli_denovo</i>      | 18975107                       | (T/C)       |
| 22759       | CakSNP22759    | <i>Kabuli</i>    | <i>Ca_Kabuli_denovo</i>      | 18975761                       | (T/C)       |
| 22760       | CakSNP22760    | <i>Kabuli</i>    | <i>Ca_Kabuli_denovo</i>      | 18975813                       | (A/G)       |
| 22761       | CakSNP22761    | <i>Kabuli</i>    | <i>Ca_Kabuli_denovo</i>      | 18976289                       | (G/A)       |
| 22762       | CakSNP22762    | <i>Kabuli</i>    | <i>Ca_Kabuli_denovo</i>      | 18976292                       | (G/A)       |
| 22763       | CakSNP22763    | <i>Kabuli</i>    | <i>Ca_Kabuli_denovo</i>      | 18977055                       | (C/G)       |
| 22764       | CakSNP22764    | <i>Kabuli</i>    | <i>Ca_Kabuli_denovo</i>      | 18978483                       | (T/C)       |
| 22765       | CakSNP22765    | <i>Kabuli</i>    | <i>Ca_Kabuli_denovo</i>      | 18981320                       | (T/C)       |
| 22766       | CakSNP22766    | <i>Kabuli</i>    | <i>Ca_Kabuli_denovo</i>      | 18987252                       | (G/T)       |
| 22767       | CakSNP22767    | <i>Kabuli</i>    | <i>Ca_Kabuli_denovo</i>      | 18992585                       | (G/A)       |
| 22768       | CakSNP22768    | <i>Kabuli</i>    | <i>Ca_Kabuli_denovo</i>      | 18997411                       | (T/C)       |
| 22769       | CakSNP22769    | <i>Kabuli</i>    | <i>Ca_Kabuli_denovo</i>      | 19005025                       | (A/C)       |
| 22770       | CakSNP22770    | <i>Kabuli</i>    | <i>Ca_Kabuli_denovo</i>      | 19005067                       | (G/T)       |
| 22771       | CakSNP22771    | <i>Kabuli</i>    | <i>Ca_Kabuli_denovo</i>      | 19006159                       | (T/C)       |
| 22772       | CakSNP22772    | <i>Kabuli</i>    | <i>Ca_Kabuli_denovo</i>      | 19008722                       | (A/T)       |
| 22773       | CakSNP22773    | <i>Kabuli</i>    | <i>Ca_Kabuli_denovo</i>      | 19010698                       | (T/C)       |
| 22774       | CakSNP22774    | <i>Kabuli</i>    | <i>Ca_Kabuli_denovo</i>      | 19010774                       | (G/A)       |

| <b>S.N.</b> | <b>SNP IDs</b> | <b>Cultivars</b> | <b>Chromosomes/scaffolds</b> | <b>Physical positions (bp)</b> | <b>SNPs</b> |
|-------------|----------------|------------------|------------------------------|--------------------------------|-------------|
| 22775       | CakSNP22775    | <i>Kabuli</i>    | <i>Ca_Kabuli_denovo</i>      | 19016555                       | (G/A)       |
| 22776       | CakSNP22776    | <i>Kabuli</i>    | <i>Ca_Kabuli_denovo</i>      | 19016573                       | (A/G)       |
| 22777       | CakSNP22777    | <i>Kabuli</i>    | <i>Ca_Kabuli_denovo</i>      | 19017747                       | (T/G)       |
| 22778       | CakSNP22778    | <i>Kabuli</i>    | <i>Ca_Kabuli_denovo</i>      | 19019311                       | (C/G)       |
| 22779       | CakSNP22779    | <i>Kabuli</i>    | <i>Ca_Kabuli_denovo</i>      | 19026033                       | (A/C)       |
| 22780       | CakSNP22780    | <i>Kabuli</i>    | <i>Ca_Kabuli_denovo</i>      | 19026034                       | (G/C)       |
| 22781       | CakSNP22781    | <i>Kabuli</i>    | <i>Ca_Kabuli_denovo</i>      | 19032739                       | (G/A)       |
| 22782       | CakSNP22782    | <i>Kabuli</i>    | <i>Ca_Kabuli_denovo</i>      | 19034113                       | (A/T)       |
| 22783       | CakSNP22783    | <i>Kabuli</i>    | <i>Ca_Kabuli_denovo</i>      | 19040086                       | (T/C)       |
| 22784       | CakSNP22784    | <i>Kabuli</i>    | <i>Ca_Kabuli_denovo</i>      | 19040170                       | (G/T)       |
| 22785       | CakSNP22785    | <i>Kabuli</i>    | <i>Ca_Kabuli_denovo</i>      | 19045310                       | (G/A)       |
| 22786       | CakSNP22786    | <i>Kabuli</i>    | <i>Ca_Kabuli_denovo</i>      | 19049477                       | (T/C)       |
| 22787       | CakSNP22787    | <i>Kabuli</i>    | <i>Ca_Kabuli_denovo</i>      | 19050458                       | (A/T)       |
| 22788       | CakSNP22788    | <i>Kabuli</i>    | <i>Ca_Kabuli_denovo</i>      | 19056692                       | (A/G)       |
| 22789       | CakSNP22789    | <i>Kabuli</i>    | <i>Ca_Kabuli_denovo</i>      | 19056836                       | (C/T)       |
| 22790       | CakSNP22790    | <i>Kabuli</i>    | <i>Ca_Kabuli_denovo</i>      | 19056854                       | (G/C)       |
| 22791       | CakSNP22791    | <i>Kabuli</i>    | <i>Ca_Kabuli_denovo</i>      | 19063347                       | (C/G)       |
| 22792       | CakSNP22792    | <i>Kabuli</i>    | <i>Ca_Kabuli_denovo</i>      | 19066239                       | (C/A)       |
| 22793       | CakSNP22793    | <i>Kabuli</i>    | <i>Ca_Kabuli_denovo</i>      | 19069211                       | (T/C)       |
| 22794       | CakSNP22794    | <i>Kabuli</i>    | <i>Ca_Kabuli_denovo</i>      | 19069247                       | (A/G)       |
| 22795       | CakSNP22795    | <i>Kabuli</i>    | <i>Ca_Kabuli_denovo</i>      | 19069451                       | (T/C)       |
| 22796       | CakSNP22796    | <i>Kabuli</i>    | <i>Ca_Kabuli_denovo</i>      | 19079071                       | (C/T)       |
| 22797       | CakSNP22797    | <i>Kabuli</i>    | <i>Ca_Kabuli_denovo</i>      | 19079086                       | (C/G)       |
| 22798       | CakSNP22798    | <i>Kabuli</i>    | <i>Ca_Kabuli_denovo</i>      | 19087156                       | (T/G)       |
| 22799       | CakSNP22799    | <i>Kabuli</i>    | <i>Ca_Kabuli_denovo</i>      | 19088934                       | (C/G)       |
| 22800       | CakSNP22800    | <i>Kabuli</i>    | <i>Ca_Kabuli_denovo</i>      | 19088942                       | (C/T)       |
| 22801       | CakSNP22801    | <i>Kabuli</i>    | <i>Ca_Kabuli_denovo</i>      | 19089410                       | (G/A)       |
| 22802       | CakSNP22802    | <i>Kabuli</i>    | <i>Ca_Kabuli_denovo</i>      | 19089454                       | (G/T)       |
| 22803       | CakSNP22803    | <i>Kabuli</i>    | <i>Ca_Kabuli_denovo</i>      | 19090604                       | (G/A)       |
| 22804       | CakSNP22804    | <i>Kabuli</i>    | <i>Ca_Kabuli_denovo</i>      | 19091010                       | (T/C)       |
| 22805       | CakSNP22805    | <i>Kabuli</i>    | <i>Ca_Kabuli_denovo</i>      | 19091040                       | (A/C)       |
| 22806       | CakSNP22806    | <i>Kabuli</i>    | <i>Ca_Kabuli_denovo</i>      | 19091083                       | (T/C)       |
| 22807       | CakSNP22807    | <i>Kabuli</i>    | <i>Ca_Kabuli_denovo</i>      | 19093687                       | (G/T)       |
| 22808       | CakSNP22808    | <i>Kabuli</i>    | <i>Ca_Kabuli_denovo</i>      | 19096458                       | (A/G)       |
| 22809       | CakSNP22809    | <i>Kabuli</i>    | <i>Ca_Kabuli_denovo</i>      | 19108084                       | (G/A)       |
| 22810       | CakSNP22810    | <i>Kabuli</i>    | <i>Ca_Kabuli_denovo</i>      | 19108134                       | (G/A)       |
| 22811       | CakSNP22811    | <i>Kabuli</i>    | <i>Ca_Kabuli_denovo</i>      | 19108151                       | (G/C)       |
| 22812       | CakSNP22812    | <i>Kabuli</i>    | <i>Ca_Kabuli_denovo</i>      | 19110319                       | (C/T)       |
| 22813       | CakSNP22813    | <i>Kabuli</i>    | <i>Ca_Kabuli_denovo</i>      | 19110332                       | (A/G)       |

| <b>S.N.</b> | <b>SNP IDs</b> | <b>Cultivars</b> | <b>Chromosomes/scaffolds</b> | <b>Physical positions (bp)</b> | <b>SNPs</b> |
|-------------|----------------|------------------|------------------------------|--------------------------------|-------------|
| 22814       | CakSNP22814    | <i>Kabuli</i>    | <i>Ca_Kabuli_denovo</i>      | 19110398                       | (C/A)       |
| 22815       | CakSNP22815    | <i>Kabuli</i>    | <i>Ca_Kabuli_denovo</i>      | 19126783                       | (T/A)       |
| 22816       | CakSNP22816    | <i>Kabuli</i>    | <i>Ca_Kabuli_denovo</i>      | 19132339                       | (A/C)       |
| 22817       | CakSNP22817    | <i>Kabuli</i>    | <i>Ca_Kabuli_denovo</i>      | 19132396                       | (T/C)       |
| 22818       | CakSNP22818    | <i>Kabuli</i>    | <i>Ca_Kabuli_denovo</i>      | 19135975                       | (G/A)       |
| 22819       | CakSNP22819    | <i>Kabuli</i>    | <i>Ca_Kabuli_denovo</i>      | 19136023                       | (A/G)       |
| 22820       | CakSNP22820    | <i>Kabuli</i>    | <i>Ca_Kabuli_denovo</i>      | 19138028                       | (T/C)       |
| 22821       | CakSNP22821    | <i>Kabuli</i>    | <i>Ca_Kabuli_denovo</i>      | 19138056                       | (G/A)       |
| 22822       | CakSNP22822    | <i>Kabuli</i>    | <i>Ca_Kabuli_denovo</i>      | 19147683                       | (A/G)       |
| 22823       | CakSNP22823    | <i>Kabuli</i>    | <i>Ca_Kabuli_denovo</i>      | 19147701                       | (T/C)       |
| 22824       | CakSNP22824    | <i>Kabuli</i>    | <i>Ca_Kabuli_denovo</i>      | 19149268                       | (C/T)       |
| 22825       | CakSNP22825    | <i>Kabuli</i>    | <i>Ca_Kabuli_denovo</i>      | 19154228                       | (G/A)       |
| 22826       | CakSNP22826    | <i>Kabuli</i>    | <i>Ca_Kabuli_denovo</i>      | 19154258                       | (A/G)       |
| 22827       | CakSNP22827    | <i>Kabuli</i>    | <i>Ca_Kabuli_denovo</i>      | 19155218                       | (T/C)       |
| 22828       | CakSNP22828    | <i>Kabuli</i>    | <i>Ca_Kabuli_denovo</i>      | 19155611                       | (A/G)       |
| 22829       | CakSNP22829    | <i>Kabuli</i>    | <i>Ca_Kabuli_denovo</i>      | 19155614                       | (G/A)       |
| 22830       | CakSNP22830    | <i>Kabuli</i>    | <i>Ca_Kabuli_denovo</i>      | 19156125                       | (T/C)       |
| 22831       | CakSNP22831    | <i>Kabuli</i>    | <i>Ca_Kabuli_denovo</i>      | 19158322                       | (T/C)       |
| 22832       | CakSNP22832    | <i>Kabuli</i>    | <i>Ca_Kabuli_denovo</i>      | 19160518                       | (C/T)       |
| 22833       | CakSNP22833    | <i>Kabuli</i>    | <i>Ca_Kabuli_denovo</i>      | 19160524                       | (T/A)       |
| 22834       | CakSNP22834    | <i>Kabuli</i>    | <i>Ca_Kabuli_denovo</i>      | 19161853                       | (C/A)       |
| 22835       | CakSNP22835    | <i>Kabuli</i>    | <i>Ca_Kabuli_denovo</i>      | 19163941                       | (C/G)       |
| 22836       | CakSNP22836    | <i>Kabuli</i>    | <i>Ca_Kabuli_denovo</i>      | 19169207                       | (G/T)       |
| 22837       | CakSNP22837    | <i>Kabuli</i>    | <i>Ca_Kabuli_denovo</i>      | 19169216                       | (C/T)       |
| 22838       | CakSNP22838    | <i>Kabuli</i>    | <i>Ca_Kabuli_denovo</i>      | 19171720                       | (G/A)       |
| 22839       | CakSNP22839    | <i>Kabuli</i>    | <i>Ca_Kabuli_denovo</i>      | 19171726                       | (A/G)       |
| 22840       | CakSNP22840    | <i>Kabuli</i>    | <i>Ca_Kabuli_denovo</i>      | 19177383                       | (C/A)       |
| 22841       | CakSNP22841    | <i>Kabuli</i>    | <i>Ca_Kabuli_denovo</i>      | 19177386                       | (C/A)       |
| 22842       | CakSNP22842    | <i>Kabuli</i>    | <i>Ca_Kabuli_denovo</i>      | 19184471                       | (C/T)       |
| 22843       | CakSNP22843    | <i>Kabuli</i>    | <i>Ca_Kabuli_denovo</i>      | 19185765                       | (A/G)       |
| 22844       | CakSNP22844    | <i>Kabuli</i>    | <i>Ca_Kabuli_denovo</i>      | 19185789                       | (A/G)       |
| 22845       | CakSNP22845    | <i>Kabuli</i>    | <i>Ca_Kabuli_denovo</i>      | 19191108                       | (A/C)       |
| 22846       | CakSNP22846    | <i>Kabuli</i>    | <i>Ca_Kabuli_denovo</i>      | 19191109                       | (A/G)       |
| 22847       | CakSNP22847    | <i>Kabuli</i>    | <i>Ca_Kabuli_denovo</i>      | 19192438                       | (G/A)       |
| 22848       | CakSNP22848    | <i>Kabuli</i>    | <i>Ca_Kabuli_denovo</i>      | 19192486                       | (C/T)       |
| 22849       | CakSNP22849    | <i>Kabuli</i>    | <i>Ca_Kabuli_denovo</i>      | 19195741                       | (A/G)       |
| 22850       | CakSNP22850    | <i>Kabuli</i>    | <i>Ca_Kabuli_denovo</i>      | 19195744                       | (G/A)       |
| 22851       | CakSNP22851    | <i>Kabuli</i>    | <i>Ca_Kabuli_denovo</i>      | 19198315                       | (T/C)       |
| 22852       | CakSNP22852    | <i>Kabuli</i>    | <i>Ca_Kabuli_denovo</i>      | 19198343                       | (T/G)       |

| <b>S.N.</b> | <b>SNP IDs</b> | <b>Cultivars</b> | <b>Chromosomes/scaffolds</b> | <b>Physical positions (bp)</b> | <b>SNPs</b> |
|-------------|----------------|------------------|------------------------------|--------------------------------|-------------|
| 22853       | CakSNP22853    | <i>Kabuli</i>    | <i>Ca_Kabuli_denovo</i>      | 19200266                       | (A/G)       |
| 22854       | CakSNP22854    | <i>Kabuli</i>    | <i>Ca_Kabuli_denovo</i>      | 19201724                       | (T/G)       |
| 22855       | CakSNP22855    | <i>Kabuli</i>    | <i>Ca_Kabuli_denovo</i>      | 19206320                       | (T/C)       |
| 22856       | CakSNP22856    | <i>Kabuli</i>    | <i>Ca_Kabuli_denovo</i>      | 19223412                       | (C/T)       |
| 22857       | CakSNP22857    | <i>Kabuli</i>    | <i>Ca_Kabuli_denovo</i>      | 19223413                       | (G/T)       |
| 22858       | CakSNP22858    | <i>Kabuli</i>    | <i>Ca_Kabuli_denovo</i>      | 19229621                       | (A/G)       |
| 22859       | CakSNP22859    | <i>Kabuli</i>    | <i>Ca_Kabuli_denovo</i>      | 19234774                       | (T/C)       |
| 22860       | CakSNP22860    | <i>Kabuli</i>    | <i>Ca_Kabuli_denovo</i>      | 19238116                       | (A/C)       |
| 22861       | CakSNP22861    | <i>Kabuli</i>    | <i>Ca_Kabuli_denovo</i>      | 19238124                       | (C/G)       |
| 22862       | CakSNP22862    | <i>Kabuli</i>    | <i>Ca_Kabuli_denovo</i>      | 19238946                       | (C/T)       |
| 22863       | CakSNP22863    | <i>Kabuli</i>    | <i>Ca_Kabuli_denovo</i>      | 19240781                       | (T/C)       |
| 22864       | CakSNP22864    | <i>Kabuli</i>    | <i>Ca_Kabuli_denovo</i>      | 19240800                       | (G/A)       |
| 22865       | CakSNP22865    | <i>Kabuli</i>    | <i>Ca_Kabuli_denovo</i>      | 19247383                       | (G/C)       |
| 22866       | CakSNP22866    | <i>Kabuli</i>    | <i>Ca_Kabuli_denovo</i>      | 19248118                       | (A/C)       |
| 22867       | CakSNP22867    | <i>Kabuli</i>    | <i>Ca_Kabuli_denovo</i>      | 19251244                       | (C/T)       |
| 22868       | CakSNP22868    | <i>Kabuli</i>    | <i>Ca_Kabuli_denovo</i>      | 19254548                       | (C/A)       |
| 22869       | CakSNP22869    | <i>Kabuli</i>    | <i>Ca_Kabuli_denovo</i>      | 19254587                       | (A/G)       |
| 22870       | CakSNP22870    | <i>Kabuli</i>    | <i>Ca_Kabuli_denovo</i>      | 19256586                       | (C/T)       |
| 22871       | CakSNP22871    | <i>Kabuli</i>    | <i>Ca_Kabuli_denovo</i>      | 19274063                       | (T/G)       |
| 22872       | CakSNP22872    | <i>Kabuli</i>    | <i>Ca_Kabuli_denovo</i>      | 19275686                       | (C/T)       |
| 22873       | CakSNP22873    | <i>Kabuli</i>    | <i>Ca_Kabuli_denovo</i>      | 19275704                       | (T/C)       |
| 22874       | CakSNP22874    | <i>Kabuli</i>    | <i>Ca_Kabuli_denovo</i>      | 19279916                       | (T/G)       |
| 22875       | CakSNP22875    | <i>Kabuli</i>    | <i>Ca_Kabuli_denovo</i>      | 19284224                       | (A/G)       |
| 22876       | CakSNP22876    | <i>Kabuli</i>    | <i>Ca_Kabuli_denovo</i>      | 19284257                       | (G/C)       |
| 22877       | CakSNP22877    | <i>Kabuli</i>    | <i>Ca_Kabuli_denovo</i>      | 19287074                       | (C/T)       |
| 22878       | CakSNP22878    | <i>Kabuli</i>    | <i>Ca_Kabuli_denovo</i>      | 19294446                       | (G/A)       |
| 22879       | CakSNP22879    | <i>Kabuli</i>    | <i>Ca_Kabuli_denovo</i>      | 19294650                       | (G/A)       |
| 22880       | CakSNP22880    | <i>Kabuli</i>    | <i>Ca_Kabuli_denovo</i>      | 19295751                       | (T/C)       |
| 22881       | CakSNP22881    | <i>Kabuli</i>    | <i>Ca_Kabuli_denovo</i>      | 19302256                       | (A/G)       |
| 22882       | CakSNP22882    | <i>Kabuli</i>    | <i>Ca_Kabuli_denovo</i>      | 19303277                       | (T/C)       |
| 22883       | CakSNP22883    | <i>Kabuli</i>    | <i>Ca_Kabuli_denovo</i>      | 19304858                       | (T/C)       |
| 22884       | CakSNP22884    | <i>Kabuli</i>    | <i>Ca_Kabuli_denovo</i>      | 19304894                       | (T/C)       |
| 22885       | CakSNP22885    | <i>Kabuli</i>    | <i>Ca_Kabuli_denovo</i>      | 19304897                       | (C/T)       |
| 22886       | CakSNP22886    | <i>Kabuli</i>    | <i>Ca_Kabuli_denovo</i>      | 19315474                       | (G/A)       |
| 22887       | CakSNP22887    | <i>Kabuli</i>    | <i>Ca_Kabuli_denovo</i>      | 19315480                       | (G/A)       |
| 22888       | CakSNP22888    | <i>Kabuli</i>    | <i>Ca_Kabuli_denovo</i>      | 19323757                       | (A/G)       |
| 22889       | CakSNP22889    | <i>Kabuli</i>    | <i>Ca_Kabuli_denovo</i>      | 19328354                       | (C/A)       |
| 22890       | CakSNP22890    | <i>Kabuli</i>    | <i>Ca_Kabuli_denovo</i>      | 19331804                       | (G/A)       |
| 22891       | CakSNP22891    | <i>Kabuli</i>    | <i>Ca_Kabuli_denovo</i>      | 19332683                       | (G/T)       |

| <b>S.N.</b> | <b>SNP IDs</b> | <b>Cultivars</b> | <b>Chromosomes/scaffolds</b> | <b>Physical positions (bp)</b> | <b>SNPs</b> |
|-------------|----------------|------------------|------------------------------|--------------------------------|-------------|
| 22892       | CakSNP22892    | <i>Kabuli</i>    | <i>Ca_Kabuli_denovo</i>      | 19335471                       | (C/G)       |
| 22893       | CakSNP22893    | <i>Kabuli</i>    | <i>Ca_Kabuli_denovo</i>      | 19346404                       | (T/C)       |
| 22894       | CakSNP22894    | <i>Kabuli</i>    | <i>Ca_Kabuli_denovo</i>      | 19348192                       | (A/C)       |
| 22895       | CakSNP22895    | <i>Kabuli</i>    | <i>Ca_Kabuli_denovo</i>      | 19348233                       | (C/G)       |
| 22896       | CakSNP22896    | <i>Kabuli</i>    | <i>Ca_Kabuli_denovo</i>      | 19349645                       | (T/G)       |
| 22897       | CakSNP22897    | <i>Kabuli</i>    | <i>Ca_Kabuli_denovo</i>      | 19350085                       | (G/A)       |
| 22898       | CakSNP22898    | <i>Kabuli</i>    | <i>Ca_Kabuli_denovo</i>      | 19352147                       | (G/A)       |
| 22899       | CakSNP22899    | <i>Kabuli</i>    | <i>Ca_Kabuli_denovo</i>      | 19356539                       | (C/T)       |
| 22900       | CakSNP22900    | <i>Kabuli</i>    | <i>Ca_Kabuli_denovo</i>      | 19361046                       | (A/G)       |
| 22901       | CakSNP22901    | <i>Kabuli</i>    | <i>Ca_Kabuli_denovo</i>      | 19367179                       | (T/C)       |
| 22902       | CakSNP22902    | <i>Kabuli</i>    | <i>Ca_Kabuli_denovo</i>      | 19370551                       | (T/C)       |
| 22903       | CakSNP22903    | <i>Kabuli</i>    | <i>Ca_Kabuli_denovo</i>      | 19374728                       | (A/G)       |
| 22904       | CakSNP22904    | <i>Kabuli</i>    | <i>Ca_Kabuli_denovo</i>      | 19376336                       | (G/A)       |
| 22905       | CakSNP22905    | <i>Kabuli</i>    | <i>Ca_Kabuli_denovo</i>      | 19376363                       | (G/A)       |
| 22906       | CakSNP22906    | <i>Kabuli</i>    | <i>Ca_Kabuli_denovo</i>      | 19379073                       | (C/T)       |
| 22907       | CakSNP22907    | <i>Kabuli</i>    | <i>Ca_Kabuli_denovo</i>      | 19379306                       | (C/A)       |
| 22908       | CakSNP22908    | <i>Kabuli</i>    | <i>Ca_Kabuli_denovo</i>      | 19379735                       | (T/C)       |
| 22909       | CakSNP22909    | <i>Kabuli</i>    | <i>Ca_Kabuli_denovo</i>      | 19385230                       | (C/G)       |
| 22910       | CakSNP22910    | <i>Kabuli</i>    | <i>Ca_Kabuli_denovo</i>      | 19385511                       | (G/C)       |
| 22911       | CakSNP22911    | <i>Kabuli</i>    | <i>Ca_Kabuli_denovo</i>      | 19385523                       | (A/G)       |
| 22912       | CakSNP22912    | <i>Kabuli</i>    | <i>Ca_Kabuli_denovo</i>      | 19390162                       | (C/T)       |
| 22913       | CakSNP22913    | <i>Kabuli</i>    | <i>Ca_Kabuli_denovo</i>      | 19390333                       | (T/C)       |
| 22914       | CakSNP22914    | <i>Kabuli</i>    | <i>Ca_Kabuli_denovo</i>      | 19391252                       | (C/T)       |
| 22915       | CakSNP22915    | <i>Kabuli</i>    | <i>Ca_Kabuli_denovo</i>      | 19398054                       | (C/A)       |
| 22916       | CakSNP22916    | <i>Kabuli</i>    | <i>Ca_Kabuli_denovo</i>      | 19398085                       | (T/C)       |
| 22917       | CakSNP22917    | <i>Kabuli</i>    | <i>Ca_Kabuli_denovo</i>      | 19398318                       | (G/A)       |
| 22918       | CakSNP22918    | <i>Kabuli</i>    | <i>Ca_Kabuli_denovo</i>      | 19400571                       | (C/T)       |
| 22919       | CakSNP22919    | <i>Kabuli</i>    | <i>Ca_Kabuli_denovo</i>      | 19401445                       | (G/C)       |
| 22920       | CakSNP22920    | <i>Kabuli</i>    | <i>Ca_Kabuli_denovo</i>      | 19401475                       | (A/G)       |
| 22921       | CakSNP22921    | <i>Kabuli</i>    | <i>Ca_Kabuli_denovo</i>      | 19402744                       | (C/G)       |
| 22922       | CakSNP22922    | <i>Kabuli</i>    | <i>Ca_Kabuli_denovo</i>      | 19407853                       | (C/G)       |
| 22923       | CakSNP22923    | <i>Kabuli</i>    | <i>Ca_Kabuli_denovo</i>      | 19416866                       | (C/T)       |
| 22924       | CakSNP22924    | <i>Kabuli</i>    | <i>Ca_Kabuli_denovo</i>      | 19421553                       | (C/T)       |
| 22925       | CakSNP22925    | <i>Kabuli</i>    | <i>Ca_Kabuli_denovo</i>      | 19421556                       | (A/G)       |
| 22926       | CakSNP22926    | <i>Kabuli</i>    | <i>Ca_Kabuli_denovo</i>      | 19422615                       | (G/A)       |
| 22927       | CakSNP22927    | <i>Kabuli</i>    | <i>Ca_Kabuli_denovo</i>      | 19422629                       | (G/A)       |
| 22928       | CakSNP22928    | <i>Kabuli</i>    | <i>Ca_Kabuli_denovo</i>      | 19429950                       | (T/G)       |
| 22929       | CakSNP22929    | <i>Kabuli</i>    | <i>Ca_Kabuli_denovo</i>      | 19429960                       | (G/A)       |
| 22930       | CakSNP22930    | <i>Kabuli</i>    | <i>Ca_Kabuli_denovo</i>      | 19430010                       | (C/G)       |

| <b>S.N.</b> | <b>SNP IDs</b> | <b>Cultivars</b> | <b>Chromosomes/scaffolds</b> | <b>Physical positions (bp)</b> | <b>SNPs</b> |
|-------------|----------------|------------------|------------------------------|--------------------------------|-------------|
| 22931       | CakSNP22931    | <i>Kabuli</i>    | <i>Ca_Kabuli_denovo</i>      | 19430159                       | (G/A)       |
| 22932       | CakSNP22932    | <i>Kabuli</i>    | <i>Ca_Kabuli_denovo</i>      | 19430182                       | (C/A)       |
| 22933       | CakSNP22933    | <i>Kabuli</i>    | <i>Ca_Kabuli_denovo</i>      | 19432428                       | (G/T)       |
| 22934       | CakSNP22934    | <i>Kabuli</i>    | <i>Ca_Kabuli_denovo</i>      | 19434335                       | (A/G)       |
| 22935       | CakSNP22935    | <i>Kabuli</i>    | <i>Ca_Kabuli_denovo</i>      | 19435393                       | (G/T)       |
| 22936       | CakSNP22936    | <i>Kabuli</i>    | <i>Ca_Kabuli_denovo</i>      | 19435406                       | (T/C)       |
| 22937       | CakSNP22937    | <i>Kabuli</i>    | <i>Ca_Kabuli_denovo</i>      | 19446380                       | (G/C)       |
| 22938       | CakSNP22938    | <i>Kabuli</i>    | <i>Ca_Kabuli_denovo</i>      | 19449849                       | (A/G)       |
| 22939       | CakSNP22939    | <i>Kabuli</i>    | <i>Ca_Kabuli_denovo</i>      | 19459653                       | (A/G)       |
| 22940       | CakSNP22940    | <i>Kabuli</i>    | <i>Ca_Kabuli_denovo</i>      | 19459666                       | (G/C)       |
| 22941       | CakSNP22941    | <i>Kabuli</i>    | <i>Ca_Kabuli_denovo</i>      | 19461469                       | (A/G)       |
| 22942       | CakSNP22942    | <i>Kabuli</i>    | <i>Ca_Kabuli_denovo</i>      | 19467652                       | (C/G)       |
| 22943       | CakSNP22943    | <i>Kabuli</i>    | <i>Ca_Kabuli_denovo</i>      | 19482253                       | (T/C)       |
| 22944       | CakSNP22944    | <i>Kabuli</i>    | <i>Ca_Kabuli_denovo</i>      | 19482283                       | (G/C)       |
| 22945       | CakSNP22945    | <i>Kabuli</i>    | <i>Ca_Kabuli_denovo</i>      | 19490764                       | (A/G)       |
| 22946       | CakSNP22946    | <i>Kabuli</i>    | <i>Ca_Kabuli_denovo</i>      | 19490794                       | (G/A)       |
| 22947       | CakSNP22947    | <i>Kabuli</i>    | <i>Ca_Kabuli_denovo</i>      | 19494880                       | (C/T)       |
| 22948       | CakSNP22948    | <i>Kabuli</i>    | <i>Ca_Kabuli_denovo</i>      | 19496641                       | (C/G)       |
| 22949       | CakSNP22949    | <i>Kabuli</i>    | <i>Ca_Kabuli_denovo</i>      | 19496704                       | (C/T)       |
| 22950       | CakSNP22950    | <i>Kabuli</i>    | <i>Ca_Kabuli_denovo</i>      | 19497856                       | (G/A)       |
| 22951       | CakSNP22951    | <i>Kabuli</i>    | <i>Ca_Kabuli_denovo</i>      | 19497910                       | (C/T)       |
| 22952       | CakSNP22952    | <i>Kabuli</i>    | <i>Ca_Kabuli_denovo</i>      | 19499330                       | (G/T)       |
| 22953       | CakSNP22953    | <i>Kabuli</i>    | <i>Ca_Kabuli_denovo</i>      | 19499333                       | (A/G)       |
| 22954       | CakSNP22954    | <i>Kabuli</i>    | <i>Ca_Kabuli_denovo</i>      | 19500292                       | (C/T)       |
| 22955       | CakSNP22955    | <i>Kabuli</i>    | <i>Ca_Kabuli_denovo</i>      | 19500454                       | (A/G)       |
| 22956       | CakSNP22956    | <i>Kabuli</i>    | <i>Ca_Kabuli_denovo</i>      | 19500513                       | (G/A)       |
| 22957       | CakSNP22957    | <i>Kabuli</i>    | <i>Ca_Kabuli_denovo</i>      | 19504817                       | (C/T)       |
| 22958       | CakSNP22958    | <i>Kabuli</i>    | <i>Ca_Kabuli_denovo</i>      | 19504856                       | (T/G)       |
| 22959       | CakSNP22959    | <i>Kabuli</i>    | <i>Ca_Kabuli_denovo</i>      | 19505980                       | (A/G)       |
| 22960       | CakSNP22960    | <i>Kabuli</i>    | <i>Ca_Kabuli_denovo</i>      | 19508060                       | (C/T)       |
| 22961       | CakSNP22961    | <i>Kabuli</i>    | <i>Ca_Kabuli_denovo</i>      | 19508077                       | (G/T)       |
| 22962       | CakSNP22962    | <i>Kabuli</i>    | <i>Ca_Kabuli_denovo</i>      | 19508114                       | (A/G)       |
| 22963       | CakSNP22963    | <i>Kabuli</i>    | <i>Ca_Kabuli_denovo</i>      | 19509112                       | (C/A)       |
| 22964       | CakSNP22964    | <i>Kabuli</i>    | <i>Ca_Kabuli_denovo</i>      | 19515877                       | (T/C)       |
| 22965       | CakSNP22965    | <i>Kabuli</i>    | <i>Ca_Kabuli_denovo</i>      | 19519198                       | (A/G)       |
| 22966       | CakSNP22966    | <i>Kabuli</i>    | <i>Ca_Kabuli_denovo</i>      | 19519203                       | (G/A)       |
| 22967       | CakSNP22967    | <i>Kabuli</i>    | <i>Ca_Kabuli_denovo</i>      | 19521213                       | (C/G)       |
| 22968       | CakSNP22968    | <i>Kabuli</i>    | <i>Ca_Kabuli_denovo</i>      | 19521958                       | (T/A)       |
| 22969       | CakSNP22969    | <i>Kabuli</i>    | <i>Ca_Kabuli_denovo</i>      | 19521965                       | (A/G)       |

| <b>S.N.</b> | <b>SNP IDs</b> | <b>Cultivars</b> | <b>Chromosomes/scaffolds</b> | <b>Physical positions (bp)</b> | <b>SNPs</b> |
|-------------|----------------|------------------|------------------------------|--------------------------------|-------------|
| 22970       | CakSNP22970    | <i>Kabuli</i>    | <i>Ca_Kabuli_denovo</i>      | 19525451                       | (G/A)       |
| 22971       | CakSNP22971    | <i>Kabuli</i>    | <i>Ca_Kabuli_denovo</i>      | 19526859                       | (G/C)       |
| 22972       | CakSNP22972    | <i>Kabuli</i>    | <i>Ca_Kabuli_denovo</i>      | 19526871                       | (T/C)       |
| 22973       | CakSNP22973    | <i>Kabuli</i>    | <i>Ca_Kabuli_denovo</i>      | 19532983                       | (T/C)       |
| 22974       | CakSNP22974    | <i>Kabuli</i>    | <i>Ca_Kabuli_denovo</i>      | 19537330                       | (A/G)       |
| 22975       | CakSNP22975    | <i>Kabuli</i>    | <i>Ca_Kabuli_denovo</i>      | 19547897                       | (G/A)       |
| 22976       | CakSNP22976    | <i>Kabuli</i>    | <i>Ca_Kabuli_denovo</i>      | 19549075                       | (C/T)       |
| 22977       | CakSNP22977    | <i>Kabuli</i>    | <i>Ca_Kabuli_denovo</i>      | 19549145                       | (A/G)       |
| 22978       | CakSNP22978    | <i>Kabuli</i>    | <i>Ca_Kabuli_denovo</i>      | 19554267                       | (A/G)       |
| 22979       | CakSNP22979    | <i>Kabuli</i>    | <i>Ca_Kabuli_denovo</i>      | 19558394                       | (C/T)       |
| 22980       | CakSNP22980    | <i>Kabuli</i>    | <i>Ca_Kabuli_denovo</i>      | 19558883                       | (A/G)       |
| 22981       | CakSNP22981    | <i>Kabuli</i>    | <i>Ca_Kabuli_denovo</i>      | 19559530                       | (T/C)       |
| 22982       | CakSNP22982    | <i>Kabuli</i>    | <i>Ca_Kabuli_denovo</i>      | 19569592                       | (C/G)       |
| 22983       | CakSNP22983    | <i>Kabuli</i>    | <i>Ca_Kabuli_denovo</i>      | 19578021                       | (C/T)       |
| 22984       | CakSNP22984    | <i>Kabuli</i>    | <i>Ca_Kabuli_denovo</i>      | 19580031                       | (C/G)       |
| 22985       | CakSNP22985    | <i>Kabuli</i>    | <i>Ca_Kabuli_denovo</i>      | 19583318                       | (G/A)       |
| 22986       | CakSNP22986    | <i>Kabuli</i>    | <i>Ca_Kabuli_denovo</i>      | 19584237                       | (C/G)       |
| 22987       | CakSNP22987    | <i>Kabuli</i>    | <i>Ca_Kabuli_denovo</i>      | 19592563                       | (A/C)       |
| 22988       | CakSNP22988    | <i>Kabuli</i>    | <i>Ca_Kabuli_denovo</i>      | 19594005                       | (A/T)       |
| 22989       | CakSNP22989    | <i>Kabuli</i>    | <i>Ca_Kabuli_denovo</i>      | 19594048                       | (G/C)       |
| 22990       | CakSNP22990    | <i>Kabuli</i>    | <i>Ca_Kabuli_denovo</i>      | 19596700                       | (C/G)       |
| 22991       | CakSNP22991    | <i>Kabuli</i>    | <i>Ca_Kabuli_denovo</i>      | 19596703                       | (G/A)       |
| 22992       | CakSNP22992    | <i>Kabuli</i>    | <i>Ca_Kabuli_denovo</i>      | 19596726                       | (G/C)       |
| 22993       | CakSNP22993    | <i>Kabuli</i>    | <i>Ca_Kabuli_denovo</i>      | 19599063                       | (G/A)       |
| 22994       | CakSNP22994    | <i>Kabuli</i>    | <i>Ca_Kabuli_denovo</i>      | 19607491                       | (A/C)       |
| 22995       | CakSNP22995    | <i>Kabuli</i>    | <i>Ca_Kabuli_denovo</i>      | 19607505                       | (G/C)       |
| 22996       | CakSNP22996    | <i>Kabuli</i>    | <i>Ca_Kabuli_denovo</i>      | 19607787                       | (T/C)       |
| 22997       | CakSNP22997    | <i>Kabuli</i>    | <i>Ca_Kabuli_denovo</i>      | 19607832                       | (G/A)       |
| 22998       | CakSNP22998    | <i>Kabuli</i>    | <i>Ca_Kabuli_denovo</i>      | 19609996                       | (C/T)       |
| 22999       | CakSNP22999    | <i>Kabuli</i>    | <i>Ca_Kabuli_denovo</i>      | 19610895                       | (C/G)       |
| 23000       | CakSNP23000    | <i>Kabuli</i>    | <i>Ca_Kabuli_denovo</i>      | 19613068                       | (C/T)       |
| 23001       | CakSNP23001    | <i>Kabuli</i>    | <i>Ca_Kabuli_denovo</i>      | 19629262                       | (A/C)       |
| 23002       | CakSNP23002    | <i>Kabuli</i>    | <i>Ca_Kabuli_denovo</i>      | 19630852                       | (G/A)       |
| 23003       | CakSNP23003    | <i>Kabuli</i>    | <i>Ca_Kabuli_denovo</i>      | 19632166                       | (T/C)       |
| 23004       | CakSNP23004    | <i>Kabuli</i>    | <i>Ca_Kabuli_denovo</i>      | 19632919                       | (C/T)       |
| 23005       | CakSNP23005    | <i>Kabuli</i>    | <i>Ca_Kabuli_denovo</i>      | 19634087                       | (T/C)       |
| 23006       | CakSNP23006    | <i>Kabuli</i>    | <i>Ca_Kabuli_denovo</i>      | 19640222                       | (A/G)       |
| 23007       | CakSNP23007    | <i>Kabuli</i>    | <i>Ca_Kabuli_denovo</i>      | 19640228                       | (C/T)       |
| 23008       | CakSNP23008    | <i>Kabuli</i>    | <i>Ca_Kabuli_denovo</i>      | 19645993                       | (C/T)       |

| <b>S.N.</b> | <b>SNP IDs</b> | <b>Cultivars</b> | <b>Chromosomes/scaffolds</b> | <b>Physical positions (bp)</b> | <b>SNPs</b> |
|-------------|----------------|------------------|------------------------------|--------------------------------|-------------|
| 23009       | CakSNP23009    | <i>Kabuli</i>    | <i>Ca_Kabuli_denovo</i>      | 19652525                       | (G/A)       |
| 23010       | CakSNP23010    | <i>Kabuli</i>    | <i>Ca_Kabuli_denovo</i>      | 19657004                       | (G/A)       |
| 23011       | CakSNP23011    | <i>Kabuli</i>    | <i>Ca_Kabuli_denovo</i>      | 19658542                       | (T/C)       |
| 23012       | CakSNP23012    | <i>Kabuli</i>    | <i>Ca_Kabuli_denovo</i>      | 19659001                       | (T/C)       |
| 23013       | CakSNP23013    | <i>Kabuli</i>    | <i>Ca_Kabuli_denovo</i>      | 19661154                       | (C/G)       |
| 23014       | CakSNP23014    | <i>Kabuli</i>    | <i>Ca_Kabuli_denovo</i>      | 19664674                       | (T/A)       |
| 23015       | CakSNP23015    | <i>Kabuli</i>    | <i>Ca_Kabuli_denovo</i>      | 19664737                       | (T/G)       |
| 23016       | CakSNP23016    | <i>Kabuli</i>    | <i>Ca_Kabuli_denovo</i>      | 19666531                       | (A/C)       |
| 23017       | CakSNP23017    | <i>Kabuli</i>    | <i>Ca_Kabuli_denovo</i>      | 19666855                       | (A/G)       |
| 23018       | CakSNP23018    | <i>Kabuli</i>    | <i>Ca_Kabuli_denovo</i>      | 19666861                       | (C/A)       |
| 23019       | CakSNP23019    | <i>Kabuli</i>    | <i>Ca_Kabuli_denovo</i>      | 19670099                       | (G/C)       |
| 23020       | CakSNP23020    | <i>Kabuli</i>    | <i>Ca_Kabuli_denovo</i>      | 19687054                       | (T/C)       |
| 23021       | CakSNP23021    | <i>Kabuli</i>    | <i>Ca_Kabuli_denovo</i>      | 19692882                       | (G/T)       |
| 23022       | CakSNP23022    | <i>Kabuli</i>    | <i>Ca_Kabuli_denovo</i>      | 19692883                       | (A/C)       |
| 23023       | CakSNP23023    | <i>Kabuli</i>    | <i>Ca_Kabuli_denovo</i>      | 19694833                       | (A/G)       |
| 23024       | CakSNP23024    | <i>Kabuli</i>    | <i>Ca_Kabuli_denovo</i>      | 19694872                       | (G/T)       |
| 23025       | CakSNP23025    | <i>Kabuli</i>    | <i>Ca_Kabuli_denovo</i>      | 19695841                       | (C/T)       |
| 23026       | CakSNP23026    | <i>Kabuli</i>    | <i>Ca_Kabuli_denovo</i>      | 19695891                       | (C/T)       |
| 23027       | CakSNP23027    | <i>Kabuli</i>    | <i>Ca_Kabuli_denovo</i>      | 19699736                       | (G/A)       |
| 23028       | CakSNP23028    | <i>Kabuli</i>    | <i>Ca_Kabuli_denovo</i>      | 19713310                       | (A/G)       |
| 23029       | CakSNP23029    | <i>Kabuli</i>    | <i>Ca_Kabuli_denovo</i>      | 19713350                       | (T/C)       |
| 23030       | CakSNP23030    | <i>Kabuli</i>    | <i>Ca_Kabuli_denovo</i>      | 19715189                       | (C/G)       |
| 23031       | CakSNP23031    | <i>Kabuli</i>    | <i>Ca_Kabuli_denovo</i>      | 19715195                       | (C/T)       |
| 23032       | CakSNP23032    | <i>Kabuli</i>    | <i>Ca_Kabuli_denovo</i>      | 19720566                       | (C/G)       |
| 23033       | CakSNP23033    | <i>Kabuli</i>    | <i>Ca_Kabuli_denovo</i>      | 19720598                       | (T/A)       |
| 23034       | CakSNP23034    | <i>Kabuli</i>    | <i>Ca_Kabuli_denovo</i>      | 19721704                       | (G/A)       |
| 23035       | CakSNP23035    | <i>Kabuli</i>    | <i>Ca_Kabuli_denovo</i>      | 19721717                       | (C/T)       |
| 23036       | CakSNP23036    | <i>Kabuli</i>    | <i>Ca_Kabuli_denovo</i>      | 19728777                       | (G/A)       |
| 23037       | CakSNP23037    | <i>Kabuli</i>    | <i>Ca_Kabuli_denovo</i>      | 19728792                       | (A/G)       |
| 23038       | CakSNP23038    | <i>Kabuli</i>    | <i>Ca_Kabuli_denovo</i>      | 19731087                       | (C/G)       |
| 23039       | CakSNP23039    | <i>Kabuli</i>    | <i>Ca_Kabuli_denovo</i>      | 19734795                       | (G/A)       |
| 23040       | CakSNP23040    | <i>Kabuli</i>    | <i>Ca_Kabuli_denovo</i>      | 19734828                       | (C/G)       |
| 23041       | CakSNP23041    | <i>Kabuli</i>    | <i>Ca_Kabuli_denovo</i>      | 19738169                       | (A/C)       |
| 23042       | CakSNP23042    | <i>Kabuli</i>    | <i>Ca_Kabuli_denovo</i>      | 19741005                       | (T/G)       |
| 23043       | CakSNP23043    | <i>Kabuli</i>    | <i>Ca_Kabuli_denovo</i>      | 19744691                       | (C/T)       |
| 23044       | CakSNP23044    | <i>Kabuli</i>    | <i>Ca_Kabuli_denovo</i>      | 19750612                       | (G/A)       |
| 23045       | CakSNP23045    | <i>Kabuli</i>    | <i>Ca_Kabuli_denovo</i>      | 19756173                       | (A/G)       |
| 23046       | CakSNP23046    | <i>Kabuli</i>    | <i>Ca_Kabuli_denovo</i>      | 19761671                       | (G/A)       |
| 23047       | CakSNP23047    | <i>Kabuli</i>    | <i>Ca_Kabuli_denovo</i>      | 19761695                       | (A/T)       |



| <b>S.N.</b> | <b>SNP IDs</b> | <b>Cultivars</b> | <b>Chromosomes/scaffolds</b> | <b>Physical positions (bp)</b> | <b>SNPs</b> |
|-------------|----------------|------------------|------------------------------|--------------------------------|-------------|
| 23048       | CakSNP23048    | <i>Kabuli</i>    | <i>Ca_Kabuli_denovo</i>      | 19762343                       | (C/T)       |
| 23049       | CakSNP23049    | <i>Kabuli</i>    | <i>Ca_Kabuli_denovo</i>      | 19762346                       | (T/C)       |
| 23050       | CakSNP23050    | <i>Kabuli</i>    | <i>Ca_Kabuli_denovo</i>      | 19764134                       | (G/C)       |
| 23051       | CakSNP23051    | <i>Kabuli</i>    | <i>Ca_Kabuli_denovo</i>      | 19769234                       | (G/T)       |
| 23052       | CakSNP23052    | <i>Kabuli</i>    | <i>Ca_Kabuli_denovo</i>      | 19774332                       | (C/T)       |
| 23053       | CakSNP23053    | <i>Kabuli</i>    | <i>Ca_Kabuli_denovo</i>      | 19776405                       | (T/G)       |
| 23054       | CakSNP23054    | <i>Kabuli</i>    | <i>Ca_Kabuli_denovo</i>      | 19776889                       | (T/G)       |
| 23055       | CakSNP23055    | <i>Kabuli</i>    | <i>Ca_Kabuli_denovo</i>      | 19781120                       | (C/T)       |
| 23056       | CakSNP23056    | <i>Kabuli</i>    | <i>Ca_Kabuli_denovo</i>      | 19788782                       | (A/G)       |
| 23057       | CakSNP23057    | <i>Kabuli</i>    | <i>Ca_Kabuli_denovo</i>      | 19788806                       | (C/G)       |
| 23058       | CakSNP23058    | <i>Kabuli</i>    | <i>Ca_Kabuli_denovo</i>      | 19793263                       | (G/A)       |
| 23059       | CakSNP23059    | <i>Kabuli</i>    | <i>Ca_Kabuli_denovo</i>      | 19794417                       | (A/G)       |
| 23060       | CakSNP23060    | <i>Kabuli</i>    | <i>Ca_Kabuli_denovo</i>      | 19797482                       | (C/T)       |
| 23061       | CakSNP23061    | <i>Kabuli</i>    | <i>Ca_Kabuli_denovo</i>      | 19797497                       | (T/C)       |
| 23062       | CakSNP23062    | <i>Kabuli</i>    | <i>Ca_Kabuli_denovo</i>      | 19806614                       | (T/G)       |
| 23063       | CakSNP23063    | <i>Kabuli</i>    | <i>Ca_Kabuli_denovo</i>      | 19806651                       | (G/C)       |
| 23064       | CakSNP23064    | <i>Kabuli</i>    | <i>Ca_Kabuli_denovo</i>      | 19808095                       | (A/C)       |
| 23065       | CakSNP23065    | <i>Kabuli</i>    | <i>Ca_Kabuli_denovo</i>      | 19808101                       | (A/G)       |
| 23066       | CakSNP23066    | <i>Kabuli</i>    | <i>Ca_Kabuli_denovo</i>      | 19814186                       | (C/A)       |
| 23067       | CakSNP23067    | <i>Kabuli</i>    | <i>Ca_Kabuli_denovo</i>      | 19825655                       | (A/G)       |
| 23068       | CakSNP23068    | <i>Kabuli</i>    | <i>Ca_Kabuli_denovo</i>      | 19825684                       | (C/G)       |
| 23069       | CakSNP23069    | <i>Kabuli</i>    | <i>Ca_Kabuli_denovo</i>      | 19831346                       | (T/C)       |
| 23070       | CakSNP23070    | <i>Kabuli</i>    | <i>Ca_Kabuli_denovo</i>      | 19831394                       | (A/G)       |
| 23071       | CakSNP23071    | <i>Kabuli</i>    | <i>Ca_Kabuli_denovo</i>      | 19833191                       | (C/T)       |
| 23072       | CakSNP23072    | <i>Kabuli</i>    | <i>Ca_Kabuli_denovo</i>      | 19835711                       | (C/T)       |
| 23073       | CakSNP23073    | <i>Kabuli</i>    | <i>Ca_Kabuli_denovo</i>      | 19837847                       | (T/C)       |
| 23074       | CakSNP23074    | <i>Kabuli</i>    | <i>Ca_Kabuli_denovo</i>      | 19837862                       | (C/A)       |
| 23075       | CakSNP23075    | <i>Kabuli</i>    | <i>Ca_Kabuli_denovo</i>      | 19838759                       | (T/C)       |
| 23076       | CakSNP23076    | <i>Kabuli</i>    | <i>Ca_Kabuli_denovo</i>      | 19842335                       | (T/G)       |
| 23077       | CakSNP23077    | <i>Kabuli</i>    | <i>Ca_Kabuli_denovo</i>      | 19842348                       | (G/A)       |
| 23078       | CakSNP23078    | <i>Kabuli</i>    | <i>Ca_Kabuli_denovo</i>      | 19848450                       | (G/C)       |
| 23079       | CakSNP23079    | <i>Kabuli</i>    | <i>Ca_Kabuli_denovo</i>      | 19848471                       | (T/C)       |
| 23080       | CakSNP23080    | <i>Kabuli</i>    | <i>Ca_Kabuli_denovo</i>      | 19852642                       | (C/T)       |
| 23081       | CakSNP23081    | <i>Kabuli</i>    | <i>Ca_Kabuli_denovo</i>      | 19852670                       | (C/G)       |
| 23082       | CakSNP23082    | <i>Kabuli</i>    | <i>Ca_Kabuli_denovo</i>      | 19857655                       | (C/T)       |
| 23083       | CakSNP23083    | <i>Kabuli</i>    | <i>Ca_Kabuli_denovo</i>      | 19857667                       | (T/C)       |
| 23084       | CakSNP23084    | <i>Kabuli</i>    | <i>Ca_Kabuli_denovo</i>      | 19858311                       | (C/G)       |
| 23085       | CakSNP23085    | <i>Kabuli</i>    | <i>Ca_Kabuli_denovo</i>      | 19858321                       | (G/C)       |
| 23086       | CakSNP23086    | <i>Kabuli</i>    | <i>Ca_Kabuli_denovo</i>      | 19866905                       | (G/C)       |

| <b>S.N.</b> | <b>SNP IDs</b> | <b>Cultivars</b> | <b>Chromosomes/scaffolds</b> | <b>Physical positions (bp)</b> | <b>SNPs</b> |
|-------------|----------------|------------------|------------------------------|--------------------------------|-------------|
| 23087       | CakSNP23087    | <i>Kabuli</i>    | <i>Ca_Kabuli_denovo</i>      | 19873840                       | (C/A)       |
| 23088       | CakSNP23088    | <i>Kabuli</i>    | <i>Ca_Kabuli_denovo</i>      | 19873946                       | (T/C)       |
| 23089       | CakSNP23089    | <i>Kabuli</i>    | <i>Ca_Kabuli_denovo</i>      | 19875607                       | (T/C)       |
| 23090       | CakSNP23090    | <i>Kabuli</i>    | <i>Ca_Kabuli_denovo</i>      | 19878301                       | (T/A)       |
| 23091       | CakSNP23091    | <i>Kabuli</i>    | <i>Ca_Kabuli_denovo</i>      | 19878370                       | (C/T)       |
| 23092       | CakSNP23092    | <i>Kabuli</i>    | <i>Ca_Kabuli_denovo</i>      | 19879644                       | (A/G)       |
| 23093       | CakSNP23093    | <i>Kabuli</i>    | <i>Ca_Kabuli_denovo</i>      | 19879658                       | (C/T)       |
| 23094       | CakSNP23094    | <i>Kabuli</i>    | <i>Ca_Kabuli_denovo</i>      | 19880110                       | (G/A)       |
| 23095       | CakSNP23095    | <i>Kabuli</i>    | <i>Ca_Kabuli_denovo</i>      | 19888886                       | (T/G)       |
| 23096       | CakSNP23096    | <i>Kabuli</i>    | <i>Ca_Kabuli_denovo</i>      | 19895426                       | (C/T)       |
| 23097       | CakSNP23097    | <i>Kabuli</i>    | <i>Ca_Kabuli_denovo</i>      | 19895429                       | (C/T)       |
| 23098       | CakSNP23098    | <i>Kabuli</i>    | <i>Ca_Kabuli_denovo</i>      | 19896219                       | (A/G)       |
| 23099       | CakSNP23099    | <i>Kabuli</i>    | <i>Ca_Kabuli_denovo</i>      | 19897592                       | (A/G)       |
| 23100       | CakSNP23100    | <i>Kabuli</i>    | <i>Ca_Kabuli_denovo</i>      | 19898670                       | (C/T)       |
| 23101       | CakSNP23101    | <i>Kabuli</i>    | <i>Ca_Kabuli_denovo</i>      | 19900442                       | (G/A)       |
| 23102       | CakSNP23102    | <i>Kabuli</i>    | <i>Ca_Kabuli_denovo</i>      | 19901441                       | (A/G)       |
| 23103       | CakSNP23103    | <i>Kabuli</i>    | <i>Ca_Kabuli_denovo</i>      | 19904162                       | (G/C)       |
| 23104       | CakSNP23104    | <i>Kabuli</i>    | <i>Ca_Kabuli_denovo</i>      | 19906133                       | (C/T)       |
| 23105       | CakSNP23105    | <i>Kabuli</i>    | <i>Ca_Kabuli_denovo</i>      | 19906160                       | (C/G)       |
| 23106       | CakSNP23106    | <i>Kabuli</i>    | <i>Ca_Kabuli_denovo</i>      | 19913298                       | (A/G)       |
| 23107       | CakSNP23107    | <i>Kabuli</i>    | <i>Ca_Kabuli_denovo</i>      | 19913325                       | (T/G)       |
| 23108       | CakSNP23108    | <i>Kabuli</i>    | <i>Ca_Kabuli_denovo</i>      | 19917542                       | (T/C)       |
| 23109       | CakSNP23109    | <i>Kabuli</i>    | <i>Ca_Kabuli_denovo</i>      | 19917611                       | (T/G)       |
| 23110       | CakSNP23110    | <i>Kabuli</i>    | <i>Ca_Kabuli_denovo</i>      | 19917912                       | (C/T)       |
| 23111       | CakSNP23111    | <i>Kabuli</i>    | <i>Ca_Kabuli_denovo</i>      | 19917922                       | (G/A)       |
| 23112       | CakSNP23112    | <i>Kabuli</i>    | <i>Ca_Kabuli_denovo</i>      | 19919217                       | (T/C)       |
| 23113       | CakSNP23113    | <i>Kabuli</i>    | <i>Ca_Kabuli_denovo</i>      | 19919234                       | (G/C)       |
| 23114       | CakSNP23114    | <i>Kabuli</i>    | <i>Ca_Kabuli_denovo</i>      | 19921011                       | (C/A)       |
| 23115       | CakSNP23115    | <i>Kabuli</i>    | <i>Ca_Kabuli_denovo</i>      | 19921041                       | (A/G)       |
| 23116       | CakSNP23116    | <i>Kabuli</i>    | <i>Ca_Kabuli_denovo</i>      | 19926525                       | (G/C)       |
| 23117       | CakSNP23117    | <i>Kabuli</i>    | <i>Ca_Kabuli_denovo</i>      | 19931580                       | (C/A)       |
| 23118       | CakSNP23118    | <i>Kabuli</i>    | <i>Ca_Kabuli_denovo</i>      | 19931658                       | (C/G)       |
| 23119       | CakSNP23119    | <i>Kabuli</i>    | <i>Ca_Kabuli_denovo</i>      | 19937324                       | (G/A)       |
| 23120       | CakSNP23120    | <i>Kabuli</i>    | <i>Ca_Kabuli_denovo</i>      | 19937333                       | (G/C)       |
| 23121       | CakSNP23121    | <i>Kabuli</i>    | <i>Ca_Kabuli_denovo</i>      | 19938269                       | (C/T)       |
| 23122       | CakSNP23122    | <i>Kabuli</i>    | <i>Ca_Kabuli_denovo</i>      | 19942267                       | (A/C)       |
| 23123       | CakSNP23123    | <i>Kabuli</i>    | <i>Ca_Kabuli_denovo</i>      | 19945803                       | (G/T)       |
| 23124       | CakSNP23124    | <i>Kabuli</i>    | <i>Ca_Kabuli_denovo</i>      | 19948365                       | (C/G)       |
| 23125       | CakSNP23125    | <i>Kabuli</i>    | <i>Ca_Kabuli_denovo</i>      | 19948387                       | (C/A)       |

| <b>S.N.</b> | <b>SNP IDs</b> | <b>Cultivars</b> | <b>Chromosomes/scaffolds</b> | <b>Physical positions (bp)</b> | <b>SNPs</b> |
|-------------|----------------|------------------|------------------------------|--------------------------------|-------------|
| 23126       | CakSNP23126    | <i>Kabuli</i>    | <i>Ca_Kabuli_denovo</i>      | 19948522                       | (C/T)       |
| 23127       | CakSNP23127    | <i>Kabuli</i>    | <i>Ca_Kabuli_denovo</i>      | 19948538                       | (T/A)       |
| 23128       | CakSNP23128    | <i>Kabuli</i>    | <i>Ca_Kabuli_denovo</i>      | 19952071                       | (T/A)       |
| 23129       | CakSNP23129    | <i>Kabuli</i>    | <i>Ca_Kabuli_denovo</i>      | 19953836                       | (C/T)       |
| 23130       | CakSNP23130    | <i>Kabuli</i>    | <i>Ca_Kabuli_denovo</i>      | 19953839                       | (T/G)       |
| 23131       | CakSNP23131    | <i>Kabuli</i>    | <i>Ca_Kabuli_denovo</i>      | 19954188                       | (C/G)       |
| 23132       | CakSNP23132    | <i>Kabuli</i>    | <i>Ca_Kabuli_denovo</i>      | 19955948                       | (G/C)       |
| 23133       | CakSNP23133    | <i>Kabuli</i>    | <i>Ca_Kabuli_denovo</i>      | 19956797                       | (C/T)       |
| 23134       | CakSNP23134    | <i>Kabuli</i>    | <i>Ca_Kabuli_denovo</i>      | 19958097                       | (C/G)       |
| 23135       | CakSNP23135    | <i>Kabuli</i>    | <i>Ca_Kabuli_denovo</i>      | 19958902                       | (A/G)       |
| 23136       | CakSNP23136    | <i>Kabuli</i>    | <i>Ca_Kabuli_denovo</i>      | 19963409                       | (G/A)       |
| 23137       | CakSNP23137    | <i>Kabuli</i>    | <i>Ca_Kabuli_denovo</i>      | 19968457                       | (G/A)       |
| 23138       | CakSNP23138    | <i>Kabuli</i>    | <i>Ca_Kabuli_denovo</i>      | 19975434                       | (T/A)       |
| 23139       | CakSNP23139    | <i>Kabuli</i>    | <i>Ca_Kabuli_denovo</i>      | 19975893                       | (G/A)       |
| 23140       | CakSNP23140    | <i>Kabuli</i>    | <i>Ca_Kabuli_denovo</i>      | 19975905                       | (G/C)       |
| 23141       | CakSNP23141    | <i>Kabuli</i>    | <i>Ca_Kabuli_denovo</i>      | 19984691                       | (C/T)       |
| 23142       | CakSNP23142    | <i>Kabuli</i>    | <i>Ca_Kabuli_denovo</i>      | 19989240                       | (G/A)       |
| 23143       | CakSNP23143    | <i>Kabuli</i>    | <i>Ca_Kabuli_denovo</i>      | 19989273                       | (A/G)       |
| 23144       | CakSNP23144    | <i>Kabuli</i>    | <i>Ca_Kabuli_denovo</i>      | 19997189                       | (A/C)       |
| 23145       | CakSNP23145    | <i>Kabuli</i>    | <i>Ca_Kabuli_denovo</i>      | 19997192                       | (C/G)       |
| 23146       | CakSNP23146    | <i>Kabuli</i>    | <i>Ca_Kabuli_denovo</i>      | 19998340                       | (T/C)       |
| 23147       | CakSNP23147    | <i>Kabuli</i>    | <i>Ca_Kabuli_denovo</i>      | 20000681                       | (G/A)       |
| 23148       | CakSNP23148    | <i>Kabuli</i>    | <i>Ca_Kabuli_denovo</i>      | 20000697                       | (T/C)       |
| 23149       | CakSNP23149    | <i>Kabuli</i>    | <i>Ca_Kabuli_denovo</i>      | 20000708                       | (T/C)       |
| 23150       | CakSNP23150    | <i>Kabuli</i>    | <i>Ca_Kabuli_denovo</i>      | 20005079                       | (G/A)       |
| 23151       | CakSNP23151    | <i>Kabuli</i>    | <i>Ca_Kabuli_denovo</i>      | 20017910                       | (C/G)       |
| 23152       | CakSNP23152    | <i>Kabuli</i>    | <i>Ca_Kabuli_denovo</i>      | 20017928                       | (T/C)       |
| 23153       | CakSNP23153    | <i>Kabuli</i>    | <i>Ca_Kabuli_denovo</i>      | 20018908                       | (C/G)       |
| 23154       | CakSNP23154    | <i>Kabuli</i>    | <i>Ca_Kabuli_denovo</i>      | 20018920                       | (C/T)       |
| 23155       | CakSNP23155    | <i>Kabuli</i>    | <i>Ca_Kabuli_denovo</i>      | 20024896                       | (C/G)       |
| 23156       | CakSNP23156    | <i>Kabuli</i>    | <i>Ca_Kabuli_denovo</i>      | 20024947                       | (C/A)       |
| 23157       | CakSNP23157    | <i>Kabuli</i>    | <i>Ca_Kabuli_denovo</i>      | 20025608                       | (A/G)       |
| 23158       | CakSNP23158    | <i>Kabuli</i>    | <i>Ca_Kabuli_denovo</i>      | 20025654                       | (G/A)       |
| 23159       | CakSNP23159    | <i>Kabuli</i>    | <i>Ca_Kabuli_denovo</i>      | 20026305                       | (T/C)       |
| 23160       | CakSNP23160    | <i>Kabuli</i>    | <i>Ca_Kabuli_denovo</i>      | 20027451                       | (G/C)       |
| 23161       | CakSNP23161    | <i>Kabuli</i>    | <i>Ca_Kabuli_denovo</i>      | 20035598                       | (C/T)       |
| 23162       | CakSNP23162    | <i>Kabuli</i>    | <i>Ca_Kabuli_denovo</i>      | 20035633                       | (G/C)       |
| 23163       | CakSNP23163    | <i>Kabuli</i>    | <i>Ca_Kabuli_denovo</i>      | 20038648                       | (G/C)       |
| 23164       | CakSNP23164    | <i>Kabuli</i>    | <i>Ca_Kabuli_denovo</i>      | 20038704                       | (A/G)       |

| <b>S.N.</b> | <b>SNP IDs</b> | <b>Cultivars</b> | <b>Chromosomes/scaffolds</b> | <b>Physical positions (bp)</b> | <b>SNPs</b> |
|-------------|----------------|------------------|------------------------------|--------------------------------|-------------|
| 23165       | CakSNP23165    | <i>Kabuli</i>    | <i>Ca_Kabuli_denovo</i>      | 20040215                       | (T/A)       |
| 23166       | CakSNP23166    | <i>Kabuli</i>    | <i>Ca_Kabuli_denovo</i>      | 20042344                       | (T/C)       |
| 23167       | CakSNP23167    | <i>Kabuli</i>    | <i>Ca_Kabuli_denovo</i>      | 20044804                       | (C/G)       |
| 23168       | CakSNP23168    | <i>Kabuli</i>    | <i>Ca_Kabuli_denovo</i>      | 20044831                       | (C/T)       |
| 23169       | CakSNP23169    | <i>Kabuli</i>    | <i>Ca_Kabuli_denovo</i>      | 20048966                       | (G/A)       |
| 23170       | CakSNP23170    | <i>Kabuli</i>    | <i>Ca_Kabuli_denovo</i>      | 20056233                       | (G/C)       |
| 23171       | CakSNP23171    | <i>Kabuli</i>    | <i>Ca_Kabuli_denovo</i>      | 20063573                       | (G/A)       |
| 23172       | CakSNP23172    | <i>Kabuli</i>    | <i>Ca_Kabuli_denovo</i>      | 20068026                       | (G/C)       |
| 23173       | CakSNP23173    | <i>Kabuli</i>    | <i>Ca_Kabuli_denovo</i>      | 20069077                       | (C/G)       |
| 23174       | CakSNP23174    | <i>Kabuli</i>    | <i>Ca_Kabuli_denovo</i>      | 20074843                       | (C/A)       |
| 23175       | CakSNP23175    | <i>Kabuli</i>    | <i>Ca_Kabuli_denovo</i>      | 20078987                       | (G/T)       |
| 23176       | CakSNP23176    | <i>Kabuli</i>    | <i>Ca_Kabuli_denovo</i>      | 20081620                       | (C/A)       |
| 23177       | CakSNP23177    | <i>Kabuli</i>    | <i>Ca_Kabuli_denovo</i>      | 20083394                       | (T/A)       |
| 23178       | CakSNP23178    | <i>Kabuli</i>    | <i>Ca_Kabuli_denovo</i>      | 20083396                       | (T/C)       |
| 23179       | CakSNP23179    | <i>Kabuli</i>    | <i>Ca_Kabuli_denovo</i>      | 20085531                       | (T/C)       |
| 23180       | CakSNP23180    | <i>Kabuli</i>    | <i>Ca_Kabuli_denovo</i>      | 20085546                       | (G/T)       |
| 23181       | CakSNP23181    | <i>Kabuli</i>    | <i>Ca_Kabuli_denovo</i>      | 20087213                       | (T/C)       |
| 23182       | CakSNP23182    | <i>Kabuli</i>    | <i>Ca_Kabuli_denovo</i>      | 20087214                       | (T/G)       |
| 23183       | CakSNP23183    | <i>Kabuli</i>    | <i>Ca_Kabuli_denovo</i>      | 20101340                       | (C/G)       |
| 23184       | CakSNP23184    | <i>Kabuli</i>    | <i>Ca_Kabuli_denovo</i>      | 20104647                       | (A/C)       |
| 23185       | CakSNP23185    | <i>Kabuli</i>    | <i>Ca_Kabuli_denovo</i>      | 20104648                       | (G/C)       |
| 23186       | CakSNP23186    | <i>Kabuli</i>    | <i>Ca_Kabuli_denovo</i>      | 20110626                       | (G/T)       |
| 23187       | CakSNP23187    | <i>Kabuli</i>    | <i>Ca_Kabuli_denovo</i>      | 20110644                       | (C/T)       |
| 23188       | CakSNP23188    | <i>Kabuli</i>    | <i>Ca_Kabuli_denovo</i>      | 20116483                       | (C/T)       |
| 23189       | CakSNP23189    | <i>Kabuli</i>    | <i>Ca_Kabuli_denovo</i>      | 20119877                       | (A/G)       |
| 23190       | CakSNP23190    | <i>Kabuli</i>    | <i>Ca_Kabuli_denovo</i>      | 20123545                       | (T/C)       |
| 23191       | CakSNP23191    | <i>Kabuli</i>    | <i>Ca_Kabuli_denovo</i>      | 20123553                       | (A/G)       |
| 23192       | CakSNP23192    | <i>Kabuli</i>    | <i>Ca_Kabuli_denovo</i>      | 20126594                       | (T/G)       |
| 23193       | CakSNP23193    | <i>Kabuli</i>    | <i>Ca_Kabuli_denovo</i>      | 20126610                       | (G/C)       |
| 23194       | CakSNP23194    | <i>Kabuli</i>    | <i>Ca_Kabuli_denovo</i>      | 20129287                       | (A/G)       |
| 23195       | CakSNP23195    | <i>Kabuli</i>    | <i>Ca_Kabuli_denovo</i>      | 20129288                       | (A/T)       |
| 23196       | CakSNP23196    | <i>Kabuli</i>    | <i>Ca_Kabuli_denovo</i>      | 20129305                       | (C/G)       |
| 23197       | CakSNP23197    | <i>Kabuli</i>    | <i>Ca_Kabuli_denovo</i>      | 20131006                       | (G/A)       |
| 23198       | CakSNP23198    | <i>Kabuli</i>    | <i>Ca_Kabuli_denovo</i>      | 20131170                       | (A/T)       |
| 23199       | CakSNP23199    | <i>Kabuli</i>    | <i>Ca_Kabuli_denovo</i>      | 20134798                       | (A/C)       |
| 23200       | CakSNP23200    | <i>Kabuli</i>    | <i>Ca_Kabuli_denovo</i>      | 20136511                       | (A/G)       |
| 23201       | CakSNP23201    | <i>Kabuli</i>    | <i>Ca_Kabuli_denovo</i>      | 20137771                       | (G/A)       |
| 23202       | CakSNP23202    | <i>Kabuli</i>    | <i>Ca_Kabuli_denovo</i>      | 20141248                       | (C/G)       |
| 23203       | CakSNP23203    | <i>Kabuli</i>    | <i>Ca_Kabuli_denovo</i>      | 20142644                       | (G/A)       |

| <b>S.N.</b> | <b>SNP IDs</b> | <b>Cultivars</b> | <b>Chromosomes/scaffolds</b> | <b>Physical positions (bp)</b> | <b>SNPs</b> |
|-------------|----------------|------------------|------------------------------|--------------------------------|-------------|
| 23204       | CakSNP23204    | <i>Kabuli</i>    | <i>Ca_Kabuli_denovo</i>      | 20145625                       | (A/G)       |
| 23205       | CakSNP23205    | <i>Kabuli</i>    | <i>Ca_Kabuli_denovo</i>      | 20145669                       | (C/G)       |
| 23206       | CakSNP23206    | <i>Kabuli</i>    | <i>Ca_Kabuli_denovo</i>      | 20145687                       | (G/T)       |
| 23207       | CakSNP23207    | <i>Kabuli</i>    | <i>Ca_Kabuli_denovo</i>      | 20150919                       | (C/T)       |
| 23208       | CakSNP23208    | <i>Kabuli</i>    | <i>Ca_Kabuli_denovo</i>      | 20152100                       | (A/T)       |
| 23209       | CakSNP23209    | <i>Kabuli</i>    | <i>Ca_Kabuli_denovo</i>      | 20156472                       | (T/C)       |
| 23210       | CakSNP23210    | <i>Kabuli</i>    | <i>Ca_Kabuli_denovo</i>      | 20157125                       | (G/A)       |
| 23211       | CakSNP23211    | <i>Kabuli</i>    | <i>Ca_Kabuli_denovo</i>      | 20157152                       | (T/C)       |
| 23212       | CakSNP23212    | <i>Kabuli</i>    | <i>Ca_Kabuli_denovo</i>      | 20158810                       | (T/C)       |
| 23213       | CakSNP23213    | <i>Kabuli</i>    | <i>Ca_Kabuli_denovo</i>      | 20159644                       | (T/C)       |
| 23214       | CakSNP23214    | <i>Kabuli</i>    | <i>Ca_Kabuli_denovo</i>      | 20159683                       | (G/T)       |
| 23215       | CakSNP23215    | <i>Kabuli</i>    | <i>Ca_Kabuli_denovo</i>      | 20161993                       | (T/C)       |
| 23216       | CakSNP23216    | <i>Kabuli</i>    | <i>Ca_Kabuli_denovo</i>      | 20162803                       | (C/T)       |
| 23217       | CakSNP23217    | <i>Kabuli</i>    | <i>Ca_Kabuli_denovo</i>      | 20162851                       | (C/T)       |
| 23218       | CakSNP23218    | <i>Kabuli</i>    | <i>Ca_Kabuli_denovo</i>      | 20164653                       | (T/C)       |
| 23219       | CakSNP23219    | <i>Kabuli</i>    | <i>Ca_Kabuli_denovo</i>      | 20164656                       | (G/A)       |
| 23220       | CakSNP23220    | <i>Kabuli</i>    | <i>Ca_Kabuli_denovo</i>      | 20170406                       | (A/G)       |
| 23221       | CakSNP23221    | <i>Kabuli</i>    | <i>Ca_Kabuli_denovo</i>      | 20170473                       | (A/C)       |
| 23222       | CakSNP23222    | <i>Kabuli</i>    | <i>Ca_Kabuli_denovo</i>      | 20180858                       | (T/G)       |
| 23223       | CakSNP23223    | <i>Kabuli</i>    | <i>Ca_Kabuli_denovo</i>      | 20194916                       | (G/C)       |
| 23224       | CakSNP23224    | <i>Kabuli</i>    | <i>Ca_Kabuli_denovo</i>      | 20194934                       | (A/C)       |
| 23225       | CakSNP23225    | <i>Kabuli</i>    | <i>Ca_Kabuli_denovo</i>      | 20196346                       | (T/C)       |
| 23226       | CakSNP23226    | <i>Kabuli</i>    | <i>Ca_Kabuli_denovo</i>      | 20200393                       | (T/C)       |
| 23227       | CakSNP23227    | <i>Kabuli</i>    | <i>Ca_Kabuli_denovo</i>      | 20202734                       | (A/T)       |
| 23228       | CakSNP23228    | <i>Kabuli</i>    | <i>Ca_Kabuli_denovo</i>      | 20202761                       | (A/G)       |
| 23229       | CakSNP23229    | <i>Kabuli</i>    | <i>Ca_Kabuli_denovo</i>      | 20212724                       | (A/G)       |
| 23230       | CakSNP23230    | <i>Kabuli</i>    | <i>Ca_Kabuli_denovo</i>      | 20212763                       | (G/A)       |
| 23231       | CakSNP23231    | <i>Kabuli</i>    | <i>Ca_Kabuli_denovo</i>      | 20219887                       | (G/A)       |
| 23232       | CakSNP23232    | <i>Kabuli</i>    | <i>Ca_Kabuli_denovo</i>      | 20220084                       | (G/A)       |
| 23233       | CakSNP23233    | <i>Kabuli</i>    | <i>Ca_Kabuli_denovo</i>      | 20220098                       | (C/G)       |
| 23234       | CakSNP23234    | <i>Kabuli</i>    | <i>Ca_Kabuli_denovo</i>      | 20230591                       | (C/T)       |
| 23235       | CakSNP23235    | <i>Kabuli</i>    | <i>Ca_Kabuli_denovo</i>      | 20230657                       | (C/T)       |
| 23236       | CakSNP23236    | <i>Kabuli</i>    | <i>Ca_Kabuli_denovo</i>      | 20236388                       | (A/G)       |
| 23237       | CakSNP23237    | <i>Kabuli</i>    | <i>Ca_Kabuli_denovo</i>      | 20240633                       | (T/G)       |
| 23238       | CakSNP23238    | <i>Kabuli</i>    | <i>Ca_Kabuli_denovo</i>      | 20240645                       | (C/G)       |
| 23239       | CakSNP23239    | <i>Kabuli</i>    | <i>Ca_Kabuli_denovo</i>      | 20241466                       | (T/C)       |
| 23240       | CakSNP23240    | <i>Kabuli</i>    | <i>Ca_Kabuli_denovo</i>      | 20241469                       | (G/A)       |
| 23241       | CakSNP23241    | <i>Kabuli</i>    | <i>Ca_Kabuli_denovo</i>      | 20244579                       | (G/A)       |
| 23242       | CakSNP23242    | <i>Kabuli</i>    | <i>Ca_Kabuli_denovo</i>      | 20249119                       | (C/A)       |

| <b>S.N.</b> | <b>SNP IDs</b> | <b>Cultivars</b> | <b>Chromosomes/scaffolds</b> | <b>Physical positions (bp)</b> | <b>SNPs</b> |
|-------------|----------------|------------------|------------------------------|--------------------------------|-------------|
| 23243       | CakSNP23243    | <i>Kabuli</i>    | <i>Ca_Kabuli_denovo</i>      | 20249316                       | (T/C)       |
| 23244       | CakSNP23244    | <i>Kabuli</i>    | <i>Ca_Kabuli_denovo</i>      | 20249645                       | (T/C)       |
| 23245       | CakSNP23245    | <i>Kabuli</i>    | <i>Ca_Kabuli_denovo</i>      | 20249668                       | (C/A)       |
| 23246       | CakSNP23246    | <i>Kabuli</i>    | <i>Ca_Kabuli_denovo</i>      | 20257527                       | (C/G)       |
| 23247       | CakSNP23247    | <i>Kabuli</i>    | <i>Ca_Kabuli_denovo</i>      | 20257528                       | (G/A)       |
| 23248       | CakSNP23248    | <i>Kabuli</i>    | <i>Ca_Kabuli_denovo</i>      | 20260076                       | (C/G)       |
| 23249       | CakSNP23249    | <i>Kabuli</i>    | <i>Ca_Kabuli_denovo</i>      | 20260108                       | (G/A)       |
| 23250       | CakSNP23250    | <i>Kabuli</i>    | <i>Ca_Kabuli_denovo</i>      | 20264839                       | (T/C)       |
| 23251       | CakSNP23251    | <i>Kabuli</i>    | <i>Ca_Kabuli_denovo</i>      | 20269376                       | (C/T)       |
| 23252       | CakSNP23252    | <i>Kabuli</i>    | <i>Ca_Kabuli_denovo</i>      | 20269682                       | (T/G)       |
| 23253       | CakSNP23253    | <i>Kabuli</i>    | <i>Ca_Kabuli_denovo</i>      | 20272800                       | (A/C)       |
| 23254       | CakSNP23254    | <i>Kabuli</i>    | <i>Ca_Kabuli_denovo</i>      | 20272866                       | (C/G)       |
| 23255       | CakSNP23255    | <i>Kabuli</i>    | <i>Ca_Kabuli_denovo</i>      | 20274219                       | (C/T)       |
| 23256       | CakSNP23256    | <i>Kabuli</i>    | <i>Ca_Kabuli_denovo</i>      | 20281838                       | (T/G)       |
| 23257       | CakSNP23257    | <i>Kabuli</i>    | <i>Ca_Kabuli_denovo</i>      | 20283791                       | (G/A)       |
| 23258       | CakSNP23258    | <i>Kabuli</i>    | <i>Ca_Kabuli_denovo</i>      | 20286365                       | (C/T)       |
| 23259       | CakSNP23259    | <i>Kabuli</i>    | <i>Ca_Kabuli_denovo</i>      | 20286656                       | (G/A)       |
| 23260       | CakSNP23260    | <i>Kabuli</i>    | <i>Ca_Kabuli_denovo</i>      | 20287498                       | (C/T)       |
| 23261       | CakSNP23261    | <i>Kabuli</i>    | <i>Ca_Kabuli_denovo</i>      | 20287522                       | (T/C)       |
| 23262       | CakSNP23262    | <i>Kabuli</i>    | <i>Ca_Kabuli_denovo</i>      | 20295694                       | (T/C)       |
| 23263       | CakSNP23263    | <i>Kabuli</i>    | <i>Ca_Kabuli_denovo</i>      | 20295877                       | (A/G)       |
| 23264       | CakSNP23264    | <i>Kabuli</i>    | <i>Ca_Kabuli_denovo</i>      | 20297276                       | (C/G)       |
| 23265       | CakSNP23265    | <i>Kabuli</i>    | <i>Ca_Kabuli_denovo</i>      | 20297287                       | (T/C)       |
| 23266       | CakSNP23266    | <i>Kabuli</i>    | <i>Ca_Kabuli_denovo</i>      | 20304659                       | (G/C)       |
| 23267       | CakSNP23267    | <i>Kabuli</i>    | <i>Ca_Kabuli_denovo</i>      | 20307614                       | (C/T)       |
| 23268       | CakSNP23268    | <i>Kabuli</i>    | <i>Ca_Kabuli_denovo</i>      | 20308015                       | (C/T)       |
| 23269       | CakSNP23269    | <i>Kabuli</i>    | <i>Ca_Kabuli_denovo</i>      | 20309478                       | (T/C)       |
| 23270       | CakSNP23270    | <i>Kabuli</i>    | <i>Ca_Kabuli_denovo</i>      | 20309524                       | (C/T)       |
| 23271       | CakSNP23271    | <i>Kabuli</i>    | <i>Ca_Kabuli_denovo</i>      | 20309582                       | (A/C)       |
| 23272       | CakSNP23272    | <i>Kabuli</i>    | <i>Ca_Kabuli_denovo</i>      | 20313491                       | (T/C)       |
| 23273       | CakSNP23273    | <i>Kabuli</i>    | <i>Ca_Kabuli_denovo</i>      | 20317455                       | (G/T)       |
| 23274       | CakSNP23274    | <i>Kabuli</i>    | <i>Ca_Kabuli_denovo</i>      | 20318783                       | (C/T)       |
| 23275       | CakSNP23275    | <i>Kabuli</i>    | <i>Ca_Kabuli_denovo</i>      | 20319883                       | (T/G)       |
| 23276       | CakSNP23276    | <i>Kabuli</i>    | <i>Ca_Kabuli_denovo</i>      | 20321059                       | (T/G)       |
| 23277       | CakSNP23277    | <i>Kabuli</i>    | <i>Ca_Kabuli_denovo</i>      | 20333539                       | (G/T)       |
| 23278       | CakSNP23278    | <i>Kabuli</i>    | <i>Ca_Kabuli_denovo</i>      | 20333593                       | (G/C)       |
| 23279       | CakSNP23279    | <i>Kabuli</i>    | <i>Ca_Kabuli_denovo</i>      | 20338885                       | (G/A)       |
| 23280       | CakSNP23280    | <i>Kabuli</i>    | <i>Ca_Kabuli_denovo</i>      | 20339572                       | (A/T)       |
| 23281       | CakSNP23281    | <i>Kabuli</i>    | <i>Ca_Kabuli_denovo</i>      | 20355762                       | (C/T)       |

| <b>S.N.</b> | <b>SNP IDs</b> | <b>Cultivars</b> | <b>Chromosomes/scaffolds</b> | <b>Physical positions (bp)</b> | <b>SNPs</b> |
|-------------|----------------|------------------|------------------------------|--------------------------------|-------------|
| 23282       | CakSNP23282    | <i>Kabuli</i>    | <i>Ca_Kabuli_denovo</i>      | 20359839                       | (A/G)       |
| 23283       | CakSNP23283    | <i>Kabuli</i>    | <i>Ca_Kabuli_denovo</i>      | 20360563                       | (C/T)       |
| 23284       | CakSNP23284    | <i>Kabuli</i>    | <i>Ca_Kabuli_denovo</i>      | 20362457                       | (C/T)       |
| 23285       | CakSNP23285    | <i>Kabuli</i>    | <i>Ca_Kabuli_denovo</i>      | 20367494                       | (C/T)       |
| 23286       | CakSNP23286    | <i>Kabuli</i>    | <i>Ca_Kabuli_denovo</i>      | 20368379                       | (A/T)       |
| 23287       | CakSNP23287    | <i>Kabuli</i>    | <i>Ca_Kabuli_denovo</i>      | 20370821                       | (T/C)       |
| 23288       | CakSNP23288    | <i>Kabuli</i>    | <i>Ca_Kabuli_denovo</i>      | 20375797                       | (A/G)       |
| 23289       | CakSNP23289    | <i>Kabuli</i>    | <i>Ca_Kabuli_denovo</i>      | 20375808                       | (G/A)       |
| 23290       | CakSNP23290    | <i>Kabuli</i>    | <i>Ca_Kabuli_denovo</i>      | 20380039                       | (G/C)       |
| 23291       | CakSNP23291    | <i>Kabuli</i>    | <i>Ca_Kabuli_denovo</i>      | 20386266                       | (G/A)       |
| 23292       | CakSNP23292    | <i>Kabuli</i>    | <i>Ca_Kabuli_denovo</i>      | 20386332                       | (A/G)       |
| 23293       | CakSNP23293    | <i>Kabuli</i>    | <i>Ca_Kabuli_denovo</i>      | 20393328                       | (C/T)       |
| 23294       | CakSNP23294    | <i>Kabuli</i>    | <i>Ca_Kabuli_denovo</i>      | 20396493                       | (A/G)       |
| 23295       | CakSNP23295    | <i>Kabuli</i>    | <i>Ca_Kabuli_denovo</i>      | 20407673                       | (G/C)       |
| 23296       | CakSNP23296    | <i>Kabuli</i>    | <i>Ca_Kabuli_denovo</i>      | 20407694                       | (C/G)       |
| 23297       | CakSNP23297    | <i>Kabuli</i>    | <i>Ca_Kabuli_denovo</i>      | 20411690                       | (A/G)       |
| 23298       | CakSNP23298    | <i>Kabuli</i>    | <i>Ca_Kabuli_denovo</i>      | 20416894                       | (G/A)       |
| 23299       | CakSNP23299    | <i>Kabuli</i>    | <i>Ca_Kabuli_denovo</i>      | 20416922                       | (T/C)       |
| 23300       | CakSNP23300    | <i>Kabuli</i>    | <i>Ca_Kabuli_denovo</i>      | 20418994                       | (G/A)       |
| 23301       | CakSNP23301    | <i>Kabuli</i>    | <i>Ca_Kabuli_denovo</i>      | 20424469                       | (A/G)       |
| 23302       | CakSNP23302    | <i>Kabuli</i>    | <i>Ca_Kabuli_denovo</i>      | 20424475                       | (T/G)       |
| 23303       | CakSNP23303    | <i>Kabuli</i>    | <i>Ca_Kabuli_denovo</i>      | 20426830                       | (C/G)       |
| 23304       | CakSNP23304    | <i>Kabuli</i>    | <i>Ca_Kabuli_denovo</i>      | 20426890                       | (G/C)       |
| 23305       | CakSNP23305    | <i>Kabuli</i>    | <i>Ca_Kabuli_denovo</i>      | 20450527                       | (C/T)       |
| 23306       | CakSNP23306    | <i>Kabuli</i>    | <i>Ca_Kabuli_denovo</i>      | 20450551                       | (T/C)       |
| 23307       | CakSNP23307    | <i>Kabuli</i>    | <i>Ca_Kabuli_denovo</i>      | 20462740                       | (T/C)       |
| 23308       | CakSNP23308    | <i>Kabuli</i>    | <i>Ca_Kabuli_denovo</i>      | 20463827                       | (T/C)       |
| 23309       | CakSNP23309    | <i>Kabuli</i>    | <i>Ca_Kabuli_denovo</i>      | 20463839                       | (C/T)       |
| 23310       | CakSNP23310    | <i>Kabuli</i>    | <i>Ca_Kabuli_denovo</i>      | 20464124                       | (C/T)       |
| 23311       | CakSNP23311    | <i>Kabuli</i>    | <i>Ca_Kabuli_denovo</i>      | 20464330                       | (G/T)       |
| 23312       | CakSNP23312    | <i>Kabuli</i>    | <i>Ca_Kabuli_denovo</i>      | 20464352                       | (G/A)       |
| 23313       | CakSNP23313    | <i>Kabuli</i>    | <i>Ca_Kabuli_denovo</i>      | 20466839                       | (C/T)       |
| 23314       | CakSNP23314    | <i>Kabuli</i>    | <i>Ca_Kabuli_denovo</i>      | 20471359                       | (G/C)       |
| 23315       | CakSNP23315    | <i>Kabuli</i>    | <i>Ca_Kabuli_denovo</i>      | 20473596                       | (G/A)       |
| 23316       | CakSNP23316    | <i>Kabuli</i>    | <i>Ca_Kabuli_denovo</i>      | 20473597                       | (T/C)       |
| 23317       | CakSNP23317    | <i>Kabuli</i>    | <i>Ca_Kabuli_denovo</i>      | 20474659                       | (A/G)       |
| 23318       | CakSNP23318    | <i>Kabuli</i>    | <i>Ca_Kabuli_denovo</i>      | 20474660                       | (G/A)       |
| 23319       | CakSNP23319    | <i>Kabuli</i>    | <i>Ca_Kabuli_denovo</i>      | 20486435                       | (C/A)       |
| 23320       | CakSNP23320    | <i>Kabuli</i>    | <i>Ca_Kabuli_denovo</i>      | 20486468                       | (A/G)       |

| <b>S.N.</b> | <b>SNP IDs</b> | <b>Cultivars</b> | <b>Chromosomes/scaffolds</b> | <b>Physical positions (bp)</b> | <b>SNPs</b> |
|-------------|----------------|------------------|------------------------------|--------------------------------|-------------|
| 23321       | CakSNP23321    | <i>Kabuli</i>    | <i>Ca_Kabuli_denovo</i>      | 20490102                       | (C/A)       |
| 23322       | CakSNP23322    | <i>Kabuli</i>    | <i>Ca_Kabuli_denovo</i>      | 20501163                       | (C/T)       |
| 23323       | CakSNP23323    | <i>Kabuli</i>    | <i>Ca_Kabuli_denovo</i>      | 20511427                       | (A/C)       |
| 23324       | CakSNP23324    | <i>Kabuli</i>    | <i>Ca_Kabuli_denovo</i>      | 20511808                       | (G/A)       |
| 23325       | CakSNP23325    | <i>Kabuli</i>    | <i>Ca_Kabuli_denovo</i>      | 20516470                       | (C/T)       |
| 23326       | CakSNP23326    | <i>Kabuli</i>    | <i>Ca_Kabuli_denovo</i>      | 20517433                       | (C/T)       |
| 23327       | CakSNP23327    | <i>Kabuli</i>    | <i>Ca_Kabuli_denovo</i>      | 20522644                       | (C/T)       |
| 23328       | CakSNP23328    | <i>Kabuli</i>    | <i>Ca_Kabuli_denovo</i>      | 20522665                       | (T/A)       |
| 23329       | CakSNP23329    | <i>Kabuli</i>    | <i>Ca_Kabuli_denovo</i>      | 20541587                       | (C/G)       |
| 23330       | CakSNP23330    | <i>Kabuli</i>    | <i>Ca_Kabuli_denovo</i>      | 20542211                       | (A/G)       |
| 23331       | CakSNP23331    | <i>Kabuli</i>    | <i>Ca_Kabuli_denovo</i>      | 20546414                       | (A/G)       |
| 23332       | CakSNP23332    | <i>Kabuli</i>    | <i>Ca_Kabuli_denovo</i>      | 20546702                       | (G/A)       |
| 23333       | CakSNP23333    | <i>Kabuli</i>    | <i>Ca_Kabuli_denovo</i>      | 20546714                       | (G/A)       |
| 23334       | CakSNP23334    | <i>Kabuli</i>    | <i>Ca_Kabuli_denovo</i>      | 20549051                       | (C/G)       |
| 23335       | CakSNP23335    | <i>Kabuli</i>    | <i>Ca_Kabuli_denovo</i>      | 20554469                       | (G/T)       |
| 23336       | CakSNP23336    | <i>Kabuli</i>    | <i>Ca_Kabuli_denovo</i>      | 20555467                       | (T/G)       |
| 23337       | CakSNP23337    | <i>Kabuli</i>    | <i>Ca_Kabuli_denovo</i>      | 20555488                       | (T/C)       |
| 23338       | CakSNP23338    | <i>Kabuli</i>    | <i>Ca_Kabuli_denovo</i>      | 20567620                       | (G/T)       |
| 23339       | CakSNP23339    | <i>Kabuli</i>    | <i>Ca_Kabuli_denovo</i>      | 20567674                       | (G/C)       |
| 23340       | CakSNP23340    | <i>Kabuli</i>    | <i>Ca_Kabuli_denovo</i>      | 20568646                       | (A/G)       |
| 23341       | CakSNP23341    | <i>Kabuli</i>    | <i>Ca_Kabuli_denovo</i>      | 20569289                       | (G/A)       |
| 23342       | CakSNP23342    | <i>Kabuli</i>    | <i>Ca_Kabuli_denovo</i>      | 20571818                       | (T/C)       |
| 23343       | CakSNP23343    | <i>Kabuli</i>    | <i>Ca_Kabuli_denovo</i>      | 20571867                       | (C/A)       |
| 23344       | CakSNP23344    | <i>Kabuli</i>    | <i>Ca_Kabuli_denovo</i>      | 20577212                       | (G/A)       |
| 23345       | CakSNP23345    | <i>Kabuli</i>    | <i>Ca_Kabuli_denovo</i>      | 20577218                       | (C/T)       |
| 23346       | CakSNP23346    | <i>Kabuli</i>    | <i>Ca_Kabuli_denovo</i>      | 20581578                       | (G/A)       |
| 23347       | CakSNP23347    | <i>Kabuli</i>    | <i>Ca_Kabuli_denovo</i>      | 20584509                       | (T/C)       |
| 23348       | CakSNP23348    | <i>Kabuli</i>    | <i>Ca_Kabuli_denovo</i>      | 20588181                       | (G/C)       |
| 23349       | CakSNP23349    | <i>Kabuli</i>    | <i>Ca_Kabuli_denovo</i>      | 20588184                       | (T/C)       |
| 23350       | CakSNP23350    | <i>Kabuli</i>    | <i>Ca_Kabuli_denovo</i>      | 20588933                       | (A/G)       |
| 23351       | CakSNP23351    | <i>Kabuli</i>    | <i>Ca_Kabuli_denovo</i>      | 20588955                       | (C/T)       |
| 23352       | CakSNP23352    | <i>Kabuli</i>    | <i>Ca_Kabuli_denovo</i>      | 20591069                       | (C/T)       |
| 23353       | CakSNP23353    | <i>Kabuli</i>    | <i>Ca_Kabuli_denovo</i>      | 20591637                       | (G/A)       |
| 23354       | CakSNP23354    | <i>Kabuli</i>    | <i>Ca_Kabuli_denovo</i>      | 20591679                       | (C/G)       |
| 23355       | CakSNP23355    | <i>Kabuli</i>    | <i>Ca_Kabuli_denovo</i>      | 20597291                       | (C/T)       |
| 23356       | CakSNP23356    | <i>Kabuli</i>    | <i>Ca_Kabuli_denovo</i>      | 20603510                       | (C/G)       |
| 23357       | CakSNP23357    | <i>Kabuli</i>    | <i>Ca_Kabuli_denovo</i>      | 20608014                       | (T/C)       |
| 23358       | CakSNP23358    | <i>Kabuli</i>    | <i>Ca_Kabuli_denovo</i>      | 20608016                       | (G/C)       |
| 23359       | CakSNP23359    | <i>Kabuli</i>    | <i>Ca_Kabuli_denovo</i>      | 20608286                       | (G/A)       |



| <b>S.N.</b> | <b>SNP IDs</b> | <b>Cultivars</b> | <b>Chromosomes/scaffolds</b> | <b>Physical positions (bp)</b> | <b>SNPs</b> |
|-------------|----------------|------------------|------------------------------|--------------------------------|-------------|
| 23360       | CakSNP23360    | <i>Kabuli</i>    | <i>Ca_Kabuli_denovo</i>      | 20608691                       | (A/G)       |
| 23361       | CakSNP23361    | <i>Kabuli</i>    | <i>Ca_Kabuli_denovo</i>      | 20610844                       | (G/A)       |
| 23362       | CakSNP23362    | <i>Kabuli</i>    | <i>Ca_Kabuli_denovo</i>      | 20618225                       | (C/A)       |
| 23363       | CakSNP23363    | <i>Kabuli</i>    | <i>Ca_Kabuli_denovo</i>      | 20620363                       | (T/C)       |
| 23364       | CakSNP23364    | <i>Kabuli</i>    | <i>Ca_Kabuli_denovo</i>      | 20621301                       | (A/G)       |
| 23365       | CakSNP23365    | <i>Kabuli</i>    | <i>Ca_Kabuli_denovo</i>      | 20622012                       | (G/A)       |
| 23366       | CakSNP23366    | <i>Kabuli</i>    | <i>Ca_Kabuli_denovo</i>      | 20624246                       | (T/C)       |
| 23367       | CakSNP23367    | <i>Kabuli</i>    | <i>Ca_Kabuli_denovo</i>      | 20624249                       | (A/G)       |
| 23368       | CakSNP23368    | <i>Kabuli</i>    | <i>Ca_Kabuli_denovo</i>      | 20626274                       | (T/C)       |
| 23369       | CakSNP23369    | <i>Kabuli</i>    | <i>Ca_Kabuli_denovo</i>      | 20626284                       | (G/A)       |
| 23370       | CakSNP23370    | <i>Kabuli</i>    | <i>Ca_Kabuli_denovo</i>      | 20629298                       | (G/A)       |
| 23371       | CakSNP23371    | <i>Kabuli</i>    | <i>Ca_Kabuli_denovo</i>      | 20629762                       | (T/C)       |
| 23372       | CakSNP23372    | <i>Kabuli</i>    | <i>Ca_Kabuli_denovo</i>      | 20629816                       | (C/T)       |
| 23373       | CakSNP23373    | <i>Kabuli</i>    | <i>Ca_Kabuli_denovo</i>      | 20629867                       | (T/C)       |
| 23374       | CakSNP23374    | <i>Kabuli</i>    | <i>Ca_Kabuli_denovo</i>      | 20631581                       | (A/C)       |
| 23375       | CakSNP23375    | <i>Kabuli</i>    | <i>Ca_Kabuli_denovo</i>      | 20632830                       | (A/T)       |
| 23376       | CakSNP23376    | <i>Kabuli</i>    | <i>Ca_Kabuli_denovo</i>      | 20632874                       | (G/A)       |
| 23377       | CakSNP23377    | <i>Kabuli</i>    | <i>Ca_Kabuli_denovo</i>      | 20644947                       | (G/A)       |
| 23378       | CakSNP23378    | <i>Kabuli</i>    | <i>Ca_Kabuli_denovo</i>      | 20647462                       | (G/A)       |
| 23379       | CakSNP23379    | <i>Kabuli</i>    | <i>Ca_Kabuli_denovo</i>      | 20647463                       | (T/A)       |
| 23380       | CakSNP23380    | <i>Kabuli</i>    | <i>Ca_Kabuli_denovo</i>      | 20649939                       | (C/T)       |
| 23381       | CakSNP23381    | <i>Kabuli</i>    | <i>Ca_Kabuli_denovo</i>      | 20649985                       | (G/A)       |
| 23382       | CakSNP23382    | <i>Kabuli</i>    | <i>Ca_Kabuli_denovo</i>      | 20651807                       | (T/C)       |
| 23383       | CakSNP23383    | <i>Kabuli</i>    | <i>Ca_Kabuli_denovo</i>      | 20652253                       | (G/A)       |
| 23384       | CakSNP23384    | <i>Kabuli</i>    | <i>Ca_Kabuli_denovo</i>      | 20652319                       | (C/G)       |
| 23385       | CakSNP23385    | <i>Kabuli</i>    | <i>Ca_Kabuli_denovo</i>      | 20655181                       | (A/G)       |
| 23386       | CakSNP23386    | <i>Kabuli</i>    | <i>Ca_Kabuli_denovo</i>      | 20655205                       | (C/T)       |
| 23387       | CakSNP23387    | <i>Kabuli</i>    | <i>Ca_Kabuli_denovo</i>      | 20658706                       | (G/C)       |
| 23388       | CakSNP23388    | <i>Kabuli</i>    | <i>Ca_Kabuli_denovo</i>      | 20659695                       | (A/G)       |
| 23389       | CakSNP23389    | <i>Kabuli</i>    | <i>Ca_Kabuli_denovo</i>      | 20660543                       | (A/G)       |
| 23390       | CakSNP23390    | <i>Kabuli</i>    | <i>Ca_Kabuli_denovo</i>      | 20661734                       | (G/A)       |
| 23391       | CakSNP23391    | <i>Kabuli</i>    | <i>Ca_Kabuli_denovo</i>      | 20663129                       | (C/T)       |
| 23392       | CakSNP23392    | <i>Kabuli</i>    | <i>Ca_Kabuli_denovo</i>      | 20663431                       | (A/G)       |
| 23393       | CakSNP23393    | <i>Kabuli</i>    | <i>Ca_Kabuli_denovo</i>      | 20663481                       | (G/C)       |
| 23394       | CakSNP23394    | <i>Kabuli</i>    | <i>Ca_Kabuli_denovo</i>      | 20664732                       | (A/G)       |
| 23395       | CakSNP23395    | <i>Kabuli</i>    | <i>Ca_Kabuli_denovo</i>      | 20666474                       | (G/A)       |
| 23396       | CakSNP23396    | <i>Kabuli</i>    | <i>Ca_Kabuli_denovo</i>      | 20666533                       | (T/C)       |
| 23397       | CakSNP23397    | <i>Kabuli</i>    | <i>Ca_Kabuli_denovo</i>      | 20671435                       | (G/T)       |
| 23398       | CakSNP23398    | <i>Kabuli</i>    | <i>Ca_Kabuli_denovo</i>      | 20671438                       | (T/C)       |

| <b>S.N.</b> | <b>SNP IDs</b> | <b>Cultivars</b> | <b>Chromosomes/scaffolds</b> | <b>Physical positions (bp)</b> | <b>SNPs</b> |
|-------------|----------------|------------------|------------------------------|--------------------------------|-------------|
| 23399       | CakSNP23399    | <i>Kabuli</i>    | <i>Ca_Kabuli_denovo</i>      | 20671699                       | (G/A)       |
| 23400       | CakSNP23400    | <i>Kabuli</i>    | <i>Ca_Kabuli_denovo</i>      | 20674290                       | (T/C)       |
| 23401       | CakSNP23401    | <i>Kabuli</i>    | <i>Ca_Kabuli_denovo</i>      | 20674470                       | (G/T)       |
| 23402       | CakSNP23402    | <i>Kabuli</i>    | <i>Ca_Kabuli_denovo</i>      | 20674471                       | (G/T)       |
| 23403       | CakSNP23403    | <i>Kabuli</i>    | <i>Ca_Kabuli_denovo</i>      | 20674987                       | (G/T)       |
| 23404       | CakSNP23404    | <i>Kabuli</i>    | <i>Ca_Kabuli_denovo</i>      | 20675794                       | (T/G)       |
| 23405       | CakSNP23405    | <i>Kabuli</i>    | <i>Ca_Kabuli_denovo</i>      | 20675819                       | (T/G)       |
| 23406       | CakSNP23406    | <i>Kabuli</i>    | <i>Ca_Kabuli_denovo</i>      | 20676549                       | (T/C)       |
| 23407       | CakSNP23407    | <i>Kabuli</i>    | <i>Ca_Kabuli_denovo</i>      | 20679128                       | (T/G)       |
| 23408       | CakSNP23408    | <i>Kabuli</i>    | <i>Ca_Kabuli_denovo</i>      | 20681826                       | (C/T)       |
| 23409       | CakSNP23409    | <i>Kabuli</i>    | <i>Ca_Kabuli_denovo</i>      | 20681874                       | (G/C)       |
| 23410       | CakSNP23410    | <i>Kabuli</i>    | <i>Ca_Kabuli_denovo</i>      | 20682581                       | (T/C)       |
| 23411       | CakSNP23411    | <i>Kabuli</i>    | <i>Ca_Kabuli_denovo</i>      | 20682638                       | (C/T)       |
| 23412       | CakSNP23412    | <i>Kabuli</i>    | <i>Ca_Kabuli_denovo</i>      | 20692335                       | (G/C)       |
| 23413       | CakSNP23413    | <i>Kabuli</i>    | <i>Ca_Kabuli_denovo</i>      | 20692407                       | (A/C)       |
| 23414       | CakSNP23414    | <i>Kabuli</i>    | <i>Ca_Kabuli_denovo</i>      | 20693892                       | (G/T)       |
| 23415       | CakSNP23415    | <i>Kabuli</i>    | <i>Ca_Kabuli_denovo</i>      | 20697315                       | (A/G)       |
| 23416       | CakSNP23416    | <i>Kabuli</i>    | <i>Ca_Kabuli_denovo</i>      | 20698586                       | (G/T)       |
| 23417       | CakSNP23417    | <i>Kabuli</i>    | <i>Ca_Kabuli_denovo</i>      | 20702486                       | (G/C)       |
| 23418       | CakSNP23418    | <i>Kabuli</i>    | <i>Ca_Kabuli_denovo</i>      | 20702493                       | (C/G)       |
| 23419       | CakSNP23419    | <i>Kabuli</i>    | <i>Ca_Kabuli_denovo</i>      | 20706779                       | (G/T)       |
| 23420       | CakSNP23420    | <i>Kabuli</i>    | <i>Ca_Kabuli_denovo</i>      | 20706816                       | (A/T)       |
| 23421       | CakSNP23421    | <i>Kabuli</i>    | <i>Ca_Kabuli_denovo</i>      | 20710940                       | (G/A)       |
| 23422       | CakSNP23422    | <i>Kabuli</i>    | <i>Ca_Kabuli_denovo</i>      | 20712713                       | (G/C)       |
| 23423       | CakSNP23423    | <i>Kabuli</i>    | <i>Ca_Kabuli_denovo</i>      | 20712728                       | (C/T)       |
| 23424       | CakSNP23424    | <i>Kabuli</i>    | <i>Ca_Kabuli_denovo</i>      | 20713275                       | (G/A)       |
| 23425       | CakSNP23425    | <i>Kabuli</i>    | <i>Ca_Kabuli_denovo</i>      | 20715271                       | (G/A)       |
| 23426       | CakSNP23426    | <i>Kabuli</i>    | <i>Ca_Kabuli_denovo</i>      | 20720557                       | (A/G)       |
| 23427       | CakSNP23427    | <i>Kabuli</i>    | <i>Ca_Kabuli_denovo</i>      | 20723873                       | (C/G)       |
| 23428       | CakSNP23428    | <i>Kabuli</i>    | <i>Ca_Kabuli_denovo</i>      | 20723876                       | (A/G)       |
| 23429       | CakSNP23429    | <i>Kabuli</i>    | <i>Ca_Kabuli_denovo</i>      | 20725341                       | (A/G)       |
| 23430       | CakSNP23430    | <i>Kabuli</i>    | <i>Ca_Kabuli_denovo</i>      | 20725359                       | (C/G)       |
| 23431       | CakSNP23431    | <i>Kabuli</i>    | <i>Ca_Kabuli_denovo</i>      | 20727759                       | (C/G)       |
| 23432       | CakSNP23432    | <i>Kabuli</i>    | <i>Ca_Kabuli_denovo</i>      | 20727764                       | (G/C)       |
| 23433       | CakSNP23433    | <i>Kabuli</i>    | <i>Ca_Kabuli_denovo</i>      | 20740597                       | (A/G)       |
| 23434       | CakSNP23434    | <i>Kabuli</i>    | <i>Ca_Kabuli_denovo</i>      | 20740642                       | (C/G)       |
| 23435       | CakSNP23435    | <i>Kabuli</i>    | <i>Ca_Kabuli_denovo</i>      | 20743843                       | (A/G)       |
| 23436       | CakSNP23436    | <i>Kabuli</i>    | <i>Ca_Kabuli_denovo</i>      | 20760598                       | (T/G)       |
| 23437       | CakSNP23437    | <i>Kabuli</i>    | <i>Ca_Kabuli_denovo</i>      | 20765039                       | (A/C)       |

| <b>S.N.</b> | <b>SNP IDs</b> | <b>Cultivars</b> | <b>Chromosomes/scaffolds</b> | <b>Physical positions (bp)</b> | <b>SNPs</b> |
|-------------|----------------|------------------|------------------------------|--------------------------------|-------------|
| 23438       | CakSNP23438    | <i>Kabuli</i>    | <i>Ca_Kabuli_denovo</i>      | 20765041                       | (A/G)       |
| 23439       | CakSNP23439    | <i>Kabuli</i>    | <i>Ca_Kabuli_denovo</i>      | 20773882                       | (C/A)       |
| 23440       | CakSNP23440    | <i>Kabuli</i>    | <i>Ca_Kabuli_denovo</i>      | 20777272                       | (G/T)       |
| 23441       | CakSNP23441    | <i>Kabuli</i>    | <i>Ca_Kabuli_denovo</i>      | 20777274                       | (T/C)       |
| 23442       | CakSNP23442    | <i>Kabuli</i>    | <i>Ca_Kabuli_denovo</i>      | 20782360                       | (T/C)       |
| 23443       | CakSNP23443    | <i>Kabuli</i>    | <i>Ca_Kabuli_denovo</i>      | 20789033                       | (T/C)       |
| 23444       | CakSNP23444    | <i>Kabuli</i>    | <i>Ca_Kabuli_denovo</i>      | 20790116                       | (A/C)       |
| 23445       | CakSNP23445    | <i>Kabuli</i>    | <i>Ca_Kabuli_denovo</i>      | 20790127                       | (C/T)       |
| 23446       | CakSNP23446    | <i>Kabuli</i>    | <i>Ca_Kabuli_denovo</i>      | 20800334                       | (G/C)       |
| 23447       | CakSNP23447    | <i>Kabuli</i>    | <i>Ca_Kabuli_denovo</i>      | 20801433                       | (G/A)       |
| 23448       | CakSNP23448    | <i>Kabuli</i>    | <i>Ca_Kabuli_denovo</i>      | 20801457                       | (A/C)       |
| 23449       | CakSNP23449    | <i>Kabuli</i>    | <i>Ca_Kabuli_denovo</i>      | 20806916                       | (G/A)       |
| 23450       | CakSNP23450    | <i>Kabuli</i>    | <i>Ca_Kabuli_denovo</i>      | 20820671                       | (G/A)       |
| 23451       | CakSNP23451    | <i>Kabuli</i>    | <i>Ca_Kabuli_denovo</i>      | 20820733                       | (T/C)       |
| 23452       | CakSNP23452    | <i>Kabuli</i>    | <i>Ca_Kabuli_denovo</i>      | 20822191                       | (C/G)       |
| 23453       | CakSNP23453    | <i>Kabuli</i>    | <i>Ca_Kabuli_denovo</i>      | 20827366                       | (C/G)       |
| 23454       | CakSNP23454    | <i>Kabuli</i>    | <i>Ca_Kabuli_denovo</i>      | 20827408                       | (C/G)       |
| 23455       | CakSNP23455    | <i>Kabuli</i>    | <i>Ca_Kabuli_denovo</i>      | 20828077                       | (G/T)       |
| 23456       | CakSNP23456    | <i>Kabuli</i>    | <i>Ca_Kabuli_denovo</i>      | 20840036                       | (A/T)       |
| 23457       | CakSNP23457    | <i>Kabuli</i>    | <i>Ca_Kabuli_denovo</i>      | 20848569                       | (C/T)       |
| 23458       | CakSNP23458    | <i>Kabuli</i>    | <i>Ca_Kabuli_denovo</i>      | 20850730                       | (C/G)       |
| 23459       | CakSNP23459    | <i>Kabuli</i>    | <i>Ca_Kabuli_denovo</i>      | 20858746                       | (C/T)       |
| 23460       | CakSNP23460    | <i>Kabuli</i>    | <i>Ca_Kabuli_denovo</i>      | 20858776                       | (G/T)       |
| 23461       | CakSNP23461    | <i>Kabuli</i>    | <i>Ca_Kabuli_denovo</i>      | 20859779                       | (C/G)       |
| 23462       | CakSNP23462    | <i>Kabuli</i>    | <i>Ca_Kabuli_denovo</i>      | 20859806                       | (A/C)       |
| 23463       | CakSNP23463    | <i>Kabuli</i>    | <i>Ca_Kabuli_denovo</i>      | 20865497                       | (C/T)       |
| 23464       | CakSNP23464    | <i>Kabuli</i>    | <i>Ca_Kabuli_denovo</i>      | 20869412                       | (A/G)       |
| 23465       | CakSNP23465    | <i>Kabuli</i>    | <i>Ca_Kabuli_denovo</i>      | 20870518                       | (G/T)       |
| 23466       | CakSNP23466    | <i>Kabuli</i>    | <i>Ca_Kabuli_denovo</i>      | 20870556                       | (T/C)       |
| 23467       | CakSNP23467    | <i>Kabuli</i>    | <i>Ca_Kabuli_denovo</i>      | 20877900                       | (G/C)       |
| 23468       | CakSNP23468    | <i>Kabuli</i>    | <i>Ca_Kabuli_denovo</i>      | 20881291                       | (A/C)       |
| 23469       | CakSNP23469    | <i>Kabuli</i>    | <i>Ca_Kabuli_denovo</i>      | 20889434                       | (C/T)       |
| 23470       | CakSNP23470    | <i>Kabuli</i>    | <i>Ca_Kabuli_denovo</i>      | 20889463                       | (A/G)       |
| 23471       | CakSNP23471    | <i>Kabuli</i>    | <i>Ca_Kabuli_denovo</i>      | 20890276                       | (G/A)       |
| 23472       | CakSNP23472    | <i>Kabuli</i>    | <i>Ca_Kabuli_denovo</i>      | 20890735                       | (C/G)       |
| 23473       | CakSNP23473    | <i>Kabuli</i>    | <i>Ca_Kabuli_denovo</i>      | 20891812                       | (G/T)       |
| 23474       | CakSNP23474    | <i>Kabuli</i>    | <i>Ca_Kabuli_denovo</i>      | 20896658                       | (T/C)       |
| 23475       | CakSNP23475    | <i>Kabuli</i>    | <i>Ca_Kabuli_denovo</i>      | 20899817                       | (G/A)       |
| 23476       | CakSNP23476    | <i>Kabuli</i>    | <i>Ca_Kabuli_denovo</i>      | 20899873                       | (C/T)       |

| <b>S.N.</b> | <b>SNP IDs</b> | <b>Cultivars</b> | <b>Chromosomes/scaffolds</b> | <b>Physical positions (bp)</b> | <b>SNPs</b> |
|-------------|----------------|------------------|------------------------------|--------------------------------|-------------|
| 23477       | CakSNP23477    | <i>Kabuli</i>    | <i>Ca_Kabuli_denovo</i>      | 20901410                       | (G/A)       |
| 23478       | CakSNP23478    | <i>Kabuli</i>    | <i>Ca_Kabuli_denovo</i>      | 20902136                       | (G/T)       |
| 23479       | CakSNP23479    | <i>Kabuli</i>    | <i>Ca_Kabuli_denovo</i>      | 20902138                       | (C/G)       |
| 23480       | CakSNP23480    | <i>Kabuli</i>    | <i>Ca_Kabuli_denovo</i>      | 20905216                       | (C/G)       |
| 23481       | CakSNP23481    | <i>Kabuli</i>    | <i>Ca_Kabuli_denovo</i>      | 20909680                       | (A/G)       |
| 23482       | CakSNP23482    | <i>Kabuli</i>    | <i>Ca_Kabuli_denovo</i>      | 20918685                       | (A/G)       |
| 23483       | CakSNP23483    | <i>Kabuli</i>    | <i>Ca_Kabuli_denovo</i>      | 20920301                       | (T/C)       |
| 23484       | CakSNP23484    | <i>Kabuli</i>    | <i>Ca_Kabuli_denovo</i>      | 20927066                       | (C/T)       |
| 23485       | CakSNP23485    | <i>Kabuli</i>    | <i>Ca_Kabuli_denovo</i>      | 20927075                       | (C/G)       |
| 23486       | CakSNP23486    | <i>Kabuli</i>    | <i>Ca_Kabuli_denovo</i>      | 20930235                       | (A/G)       |
| 23487       | CakSNP23487    | <i>Kabuli</i>    | <i>Ca_Kabuli_denovo</i>      | 20931160                       | (C/G)       |
| 23488       | CakSNP23488    | <i>Kabuli</i>    | <i>Ca_Kabuli_denovo</i>      | 20932009                       | (C/G)       |
| 23489       | CakSNP23489    | <i>Kabuli</i>    | <i>Ca_Kabuli_denovo</i>      | 20932069                       | (A/G)       |
| 23490       | CakSNP23490    | <i>Kabuli</i>    | <i>Ca_Kabuli_denovo</i>      | 20935272                       | (C/T)       |
| 23491       | CakSNP23491    | <i>Kabuli</i>    | <i>Ca_Kabuli_denovo</i>      | 20939058                       | (G/A)       |
| 23492       | CakSNP23492    | <i>Kabuli</i>    | <i>Ca_Kabuli_denovo</i>      | 20942369                       | (T/G)       |
| 23493       | CakSNP23493    | <i>Kabuli</i>    | <i>Ca_Kabuli_denovo</i>      | 20943817                       | (C/G)       |
| 23494       | CakSNP23494    | <i>Kabuli</i>    | <i>Ca_Kabuli_denovo</i>      | 20943829                       | (C/T)       |
| 23495       | CakSNP23495    | <i>Kabuli</i>    | <i>Ca_Kabuli_denovo</i>      | 20947352                       | (G/A)       |
| 23496       | CakSNP23496    | <i>Kabuli</i>    | <i>Ca_Kabuli_denovo</i>      | 20952554                       | (G/C)       |
| 23497       | CakSNP23497    | <i>Kabuli</i>    | <i>Ca_Kabuli_denovo</i>      | 20954312                       | (C/T)       |
| 23498       | CakSNP23498    | <i>Kabuli</i>    | <i>Ca_Kabuli_denovo</i>      | 20954315                       | (T/C)       |
| 23499       | CakSNP23499    | <i>Kabuli</i>    | <i>Ca_Kabuli_denovo</i>      | 20956282                       | (G/C)       |
| 23500       | CakSNP23500    | <i>Kabuli</i>    | <i>Ca_Kabuli_denovo</i>      | 20956459                       | (C/T)       |
| 23501       | CakSNP23501    | <i>Kabuli</i>    | <i>Ca_Kabuli_denovo</i>      | 20957959                       | (T/C)       |
| 23502       | CakSNP23502    | <i>Kabuli</i>    | <i>Ca_Kabuli_denovo</i>      | 20959789                       | (T/A)       |
| 23503       | CakSNP23503    | <i>Kabuli</i>    | <i>Ca_Kabuli_denovo</i>      | 20962222                       | (G/A)       |
| 23504       | CakSNP23504    | <i>Kabuli</i>    | <i>Ca_Kabuli_denovo</i>      | 20962285                       | (A/G)       |
| 23505       | CakSNP23505    | <i>Kabuli</i>    | <i>Ca_Kabuli_denovo</i>      | 20967037                       | (G/A)       |
| 23506       | CakSNP23506    | <i>Kabuli</i>    | <i>Ca_Kabuli_denovo</i>      | 20975342                       | (A/G)       |
| 23507       | CakSNP23507    | <i>Kabuli</i>    | <i>Ca_Kabuli_denovo</i>      | 20976175                       | (G/A)       |
| 23508       | CakSNP23508    | <i>Kabuli</i>    | <i>Ca_Kabuli_denovo</i>      | 20976187                       | (A/G)       |
| 23509       | CakSNP23509    | <i>Kabuli</i>    | <i>Ca_Kabuli_denovo</i>      | 20976285                       | (G/A)       |
| 23510       | CakSNP23510    | <i>Kabuli</i>    | <i>Ca_Kabuli_denovo</i>      | 20978728                       | (G/A)       |
| 23511       | CakSNP23511    | <i>Kabuli</i>    | <i>Ca_Kabuli_denovo</i>      | 20980830                       | (T/C)       |
| 23512       | CakSNP23512    | <i>Kabuli</i>    | <i>Ca_Kabuli_denovo</i>      | 20980872                       | (T/C)       |
| 23513       | CakSNP23513    | <i>Kabuli</i>    | <i>Ca_Kabuli_denovo</i>      | 20982688                       | (A/G)       |
| 23514       | CakSNP23514    | <i>Kabuli</i>    | <i>Ca_Kabuli_denovo</i>      | 20982709                       | (G/T)       |
| 23515       | CakSNP23515    | <i>Kabuli</i>    | <i>Ca_Kabuli_denovo</i>      | 20986531                       | (C/T)       |

| <b>S.N.</b> | <b>SNP IDs</b> | <b>Cultivars</b> | <b>Chromosomes/scaffolds</b> | <b>Physical positions (bp)</b> | <b>SNPs</b> |
|-------------|----------------|------------------|------------------------------|--------------------------------|-------------|
| 23516       | CakSNP23516    | <i>Kabuli</i>    | <i>Ca_Kabuli_denovo</i>      | 20987836                       | (A/G)       |
| 23517       | CakSNP23517    | <i>Kabuli</i>    | <i>Ca_Kabuli_denovo</i>      | 20990243                       | (A/G)       |
| 23518       | CakSNP23518    | <i>Kabuli</i>    | <i>Ca_Kabuli_denovo</i>      | 20990278                       | (C/A)       |
| 23519       | CakSNP23519    | <i>Kabuli</i>    | <i>Ca_Kabuli_denovo</i>      | 20994487                       | (A/G)       |
| 23520       | CakSNP23520    | <i>Kabuli</i>    | <i>Ca_Kabuli_denovo</i>      | 20994648                       | (A/C)       |
| 23521       | CakSNP23521    | <i>Kabuli</i>    | <i>Ca_Kabuli_denovo</i>      | 20994656                       | (T/C)       |
| 23522       | CakSNP23522    | <i>Kabuli</i>    | <i>Ca_Kabuli_denovo</i>      | 20996617                       | (A/G)       |
| 23523       | CakSNP23523    | <i>Kabuli</i>    | <i>Ca_Kabuli_denovo</i>      | 21002777                       | (T/C)       |
| 23524       | CakSNP23524    | <i>Kabuli</i>    | <i>Ca_Kabuli_denovo</i>      | 21005000                       | (G/A)       |
| 23525       | CakSNP23525    | <i>Kabuli</i>    | <i>Ca_Kabuli_denovo</i>      | 21005039                       | (G/A)       |
| 23526       | CakSNP23526    | <i>Kabuli</i>    | <i>Ca_Kabuli_denovo</i>      | 21005600                       | (G/C)       |
| 23527       | CakSNP23527    | <i>Kabuli</i>    | <i>Ca_Kabuli_denovo</i>      | 21005601                       | (C/T)       |
| 23528       | CakSNP23528    | <i>Kabuli</i>    | <i>Ca_Kabuli_denovo</i>      | 21008057                       | (T/G)       |
| 23529       | CakSNP23529    | <i>Kabuli</i>    | <i>Ca_Kabuli_denovo</i>      | 21008099                       | (G/C)       |
| 23530       | CakSNP23530    | <i>Kabuli</i>    | <i>Ca_Kabuli_denovo</i>      | 21008633                       | (A/C)       |
| 23531       | CakSNP23531    | <i>Kabuli</i>    | <i>Ca_Kabuli_denovo</i>      | 21008674                       | (C/G)       |
| 23532       | CakSNP23532    | <i>Kabuli</i>    | <i>Ca_Kabuli_denovo</i>      | 21012356                       | (C/T)       |
| 23533       | CakSNP23533    | <i>Kabuli</i>    | <i>Ca_Kabuli_denovo</i>      | 21012365                       | (C/T)       |
| 23534       | CakSNP23534    | <i>Kabuli</i>    | <i>Ca_Kabuli_denovo</i>      | 21017170                       | (C/G)       |
| 23535       | CakSNP23535    | <i>Kabuli</i>    | <i>Ca_Kabuli_denovo</i>      | 21017204                       | (G/A)       |
| 23536       | CakSNP23536    | <i>Kabuli</i>    | <i>Ca_Kabuli_denovo</i>      | 21017243                       | (A/G)       |
| 23537       | CakSNP23537    | <i>Kabuli</i>    | <i>Ca_Kabuli_denovo</i>      | 21020518                       | (G/A)       |
| 23538       | CakSNP23538    | <i>Kabuli</i>    | <i>Ca_Kabuli_denovo</i>      | 21020548                       | (A/T)       |
| 23539       | CakSNP23539    | <i>Kabuli</i>    | <i>Ca_Kabuli_denovo</i>      | 21024546                       | (T/C)       |
| 23540       | CakSNP23540    | <i>Kabuli</i>    | <i>Ca_Kabuli_denovo</i>      | 21030016                       | (C/T)       |
| 23541       | CakSNP23541    | <i>Kabuli</i>    | <i>Ca_Kabuli_denovo</i>      | 21044341                       | (C/T)       |
| 23542       | CakSNP23542    | <i>Kabuli</i>    | <i>Ca_Kabuli_denovo</i>      | 21047977                       | (T/C)       |
| 23543       | CakSNP23543    | <i>Kabuli</i>    | <i>Ca_Kabuli_denovo</i>      | 21061094                       | (T/A)       |
| 23544       | CakSNP23544    | <i>Kabuli</i>    | <i>Ca_Kabuli_denovo</i>      | 21068365                       | (G/C)       |
| 23545       | CakSNP23545    | <i>Kabuli</i>    | <i>Ca_Kabuli_denovo</i>      | 21068404                       | (G/T)       |
| 23546       | CakSNP23546    | <i>Kabuli</i>    | <i>Ca_Kabuli_denovo</i>      | 21071286                       | (C/T)       |
| 23547       | CakSNP23547    | <i>Kabuli</i>    | <i>Ca_Kabuli_denovo</i>      | 21077257                       | (A/G)       |
| 23548       | CakSNP23548    | <i>Kabuli</i>    | <i>Ca_Kabuli_denovo</i>      | 21077281                       | (T/C)       |
| 23549       | CakSNP23549    | <i>Kabuli</i>    | <i>Ca_Kabuli_denovo</i>      | 21082230                       | (G/T)       |
| 23550       | CakSNP23550    | <i>Kabuli</i>    | <i>Ca_Kabuli_denovo</i>      | 21082236                       | (G/T)       |
| 23551       | CakSNP23551    | <i>Kabuli</i>    | <i>Ca_Kabuli_denovo</i>      | 21082241                       | (T/G)       |
| 23552       | CakSNP23552    | <i>Kabuli</i>    | <i>Ca_Kabuli_denovo</i>      | 21082258                       | (T/G)       |
| 23553       | CakSNP23553    | <i>Kabuli</i>    | <i>Ca_Kabuli_denovo</i>      | 21084346                       | (T/G)       |
| 23554       | CakSNP23554    | <i>Kabuli</i>    | <i>Ca_Kabuli_denovo</i>      | 21084718                       | (T/G)       |

| <b>S.N.</b> | <b>SNP IDs</b> | <b>Cultivars</b> | <b>Chromosomes/scaffolds</b> | <b>Physical positions (bp)</b> | <b>SNPs</b> |
|-------------|----------------|------------------|------------------------------|--------------------------------|-------------|
| 23555       | CakSNP23555    | <i>Kabuli</i>    | <i>Ca_Kabuli_denovo</i>      | 21084761                       | (A/G)       |
| 23556       | CakSNP23556    | <i>Kabuli</i>    | <i>Ca_Kabuli_denovo</i>      | 21090649                       | (T/C)       |
| 23557       | CakSNP23557    | <i>Kabuli</i>    | <i>Ca_Kabuli_denovo</i>      | 21090888                       | (C/G)       |
| 23558       | CakSNP23558    | <i>Kabuli</i>    | <i>Ca_Kabuli_denovo</i>      | 21090964                       | (T/G)       |
| 23559       | CakSNP23559    | <i>Kabuli</i>    | <i>Ca_Kabuli_denovo</i>      | 21090985                       | (G/A)       |
| 23560       | CakSNP23560    | <i>Kabuli</i>    | <i>Ca_Kabuli_denovo</i>      | 21100610                       | (C/T)       |
| 23561       | CakSNP23561    | <i>Kabuli</i>    | <i>Ca_Kabuli_denovo</i>      | 21106642                       | (C/A)       |
| 23562       | CakSNP23562    | <i>Kabuli</i>    | <i>Ca_Kabuli_denovo</i>      | 21106699                       | (A/C)       |
| 23563       | CakSNP23563    | <i>Kabuli</i>    | <i>Ca_Kabuli_denovo</i>      | 21110848                       | (T/C)       |
| 23564       | CakSNP23564    | <i>Kabuli</i>    | <i>Ca_Kabuli_denovo</i>      | 21113900                       | (T/C)       |
| 23565       | CakSNP23565    | <i>Kabuli</i>    | <i>Ca_Kabuli_denovo</i>      | 21115327                       | (A/G)       |
| 23566       | CakSNP23566    | <i>Kabuli</i>    | <i>Ca_Kabuli_denovo</i>      | 21115333                       | (A/G)       |
| 23567       | CakSNP23567    | <i>Kabuli</i>    | <i>Ca_Kabuli_denovo</i>      | 21117191                       | (C/A)       |
| 23568       | CakSNP23568    | <i>Kabuli</i>    | <i>Ca_Kabuli_denovo</i>      | 21117193                       | (A/G)       |
| 23569       | CakSNP23569    | <i>Kabuli</i>    | <i>Ca_Kabuli_denovo</i>      | 21126652                       | (G/A)       |
| 23570       | CakSNP23570    | <i>Kabuli</i>    | <i>Ca_Kabuli_denovo</i>      | 21126679                       | (A/G)       |
| 23571       | CakSNP23571    | <i>Kabuli</i>    | <i>Ca_Kabuli_denovo</i>      | 21134870                       | (G/C)       |
| 23572       | CakSNP23572    | <i>Kabuli</i>    | <i>Ca_Kabuli_denovo</i>      | 21144962                       | (T/A)       |
| 23573       | CakSNP23573    | <i>Kabuli</i>    | <i>Ca_Kabuli_denovo</i>      | 21144985                       | (C/A)       |
| 23574       | CakSNP23574    | <i>Kabuli</i>    | <i>Ca_Kabuli_denovo</i>      | 21147449                       | (T/C)       |
| 23575       | CakSNP23575    | <i>Kabuli</i>    | <i>Ca_Kabuli_denovo</i>      | 21150332                       | (C/T)       |
| 23576       | CakSNP23576    | <i>Kabuli</i>    | <i>Ca_Kabuli_denovo</i>      | 21154187                       | (C/T)       |
| 23577       | CakSNP23577    | <i>Kabuli</i>    | <i>Ca_Kabuli_denovo</i>      | 21158231                       | (C/G)       |
| 23578       | CakSNP23578    | <i>Kabuli</i>    | <i>Ca_Kabuli_denovo</i>      | 21160880                       | (G/A)       |
| 23579       | CakSNP23579    | <i>Kabuli</i>    | <i>Ca_Kabuli_denovo</i>      | 21162260                       | (T/C)       |
| 23580       | CakSNP23580    | <i>Kabuli</i>    | <i>Ca_Kabuli_denovo</i>      | 21162266                       | (A/G)       |
| 23581       | CakSNP23581    | <i>Kabuli</i>    | <i>Ca_Kabuli_denovo</i>      | 21169177                       | (C/T)       |
| 23582       | CakSNP23582    | <i>Kabuli</i>    | <i>Ca_Kabuli_denovo</i>      | 21173866                       | (C/A)       |
| 23583       | CakSNP23583    | <i>Kabuli</i>    | <i>Ca_Kabuli_denovo</i>      | 21176854                       | (A/G)       |
| 23584       | CakSNP23584    | <i>Kabuli</i>    | <i>Ca_Kabuli_denovo</i>      | 21176884                       | (G/A)       |
| 23585       | CakSNP23585    | <i>Kabuli</i>    | <i>Ca_Kabuli_denovo</i>      | 21178432                       | (G/A)       |
| 23586       | CakSNP23586    | <i>Kabuli</i>    | <i>Ca_Kabuli_denovo</i>      | 21179437                       | (A/G)       |
| 23587       | CakSNP23587    | <i>Kabuli</i>    | <i>Ca_Kabuli_denovo</i>      | 21179446                       | (C/G)       |
| 23588       | CakSNP23588    | <i>Kabuli</i>    | <i>Ca_Kabuli_denovo</i>      | 21181786                       | (T/C)       |
| 23589       | CakSNP23589    | <i>Kabuli</i>    | <i>Ca_Kabuli_denovo</i>      | 21184619                       | (T/C)       |
| 23590       | CakSNP23590    | <i>Kabuli</i>    | <i>Ca_Kabuli_denovo</i>      | 21184628                       | (T/C)       |
| 23591       | CakSNP23591    | <i>Kabuli</i>    | <i>Ca_Kabuli_denovo</i>      | 21186065                       | (G/A)       |
| 23592       | CakSNP23592    | <i>Kabuli</i>    | <i>Ca_Kabuli_denovo</i>      | 21186539                       | (G/T)       |
| 23593       | CakSNP23593    | <i>Kabuli</i>    | <i>Ca_Kabuli_denovo</i>      | 21190874                       | (G/T)       |

| <b>S.N.</b> | <b>SNP IDs</b> | <b>Cultivars</b> | <b>Chromosomes/scaffolds</b> | <b>Physical positions (bp)</b> | <b>SNPs</b> |
|-------------|----------------|------------------|------------------------------|--------------------------------|-------------|
| 23594       | CakSNP23594    | <i>Kabuli</i>    | <i>Ca_Kabuli_denovo</i>      | 21194997                       | (C/T)       |
| 23595       | CakSNP23595    | <i>Kabuli</i>    | <i>Ca_Kabuli_denovo</i>      | 21199835                       | (G/C)       |
| 23596       | CakSNP23596    | <i>Kabuli</i>    | <i>Ca_Kabuli_denovo</i>      | 21200833                       | (T/G)       |
| 23597       | CakSNP23597    | <i>Kabuli</i>    | <i>Ca_Kabuli_denovo</i>      | 21204235                       | (G/C)       |
| 23598       | CakSNP23598    | <i>Kabuli</i>    | <i>Ca_Kabuli_denovo</i>      | 21208112                       | (C/A)       |
| 23599       | CakSNP23599    | <i>Kabuli</i>    | <i>Ca_Kabuli_denovo</i>      | 21208135                       | (A/G)       |
| 23600       | CakSNP23600    | <i>Kabuli</i>    | <i>Ca_Kabuli_denovo</i>      | 21213971                       | (C/T)       |
| 23601       | CakSNP23601    | <i>Kabuli</i>    | <i>Ca_Kabuli_denovo</i>      | 21221451                       | (T/G)       |
| 23602       | CakSNP23602    | <i>Kabuli</i>    | <i>Ca_Kabuli_denovo</i>      | 21225048                       | (C/G)       |
| 23603       | CakSNP23603    | <i>Kabuli</i>    | <i>Ca_Kabuli_denovo</i>      | 21225421                       | (G/C)       |
| 23604       | CakSNP23604    | <i>Kabuli</i>    | <i>Ca_Kabuli_denovo</i>      | 21231167                       | (T/G)       |
| 23605       | CakSNP23605    | <i>Kabuli</i>    | <i>Ca_Kabuli_denovo</i>      | 21232376                       | (C/T)       |
| 23606       | CakSNP23606    | <i>Kabuli</i>    | <i>Ca_Kabuli_denovo</i>      | 21232394                       | (C/T)       |
| 23607       | CakSNP23607    | <i>Kabuli</i>    | <i>Ca_Kabuli_denovo</i>      | 21244441                       | (C/T)       |
| 23608       | CakSNP23608    | <i>Kabuli</i>    | <i>Ca_Kabuli_denovo</i>      | 21250052                       | (G/A)       |
| 23609       | CakSNP23609    | <i>Kabuli</i>    | <i>Ca_Kabuli_denovo</i>      | 21250842                       | (G/A)       |
| 23610       | CakSNP23610    | <i>Kabuli</i>    | <i>Ca_Kabuli_denovo</i>      | 21251182                       | (T/G)       |
| 23611       | CakSNP23611    | <i>Kabuli</i>    | <i>Ca_Kabuli_denovo</i>      | 21254233                       | (T/C)       |
| 23612       | CakSNP23612    | <i>Kabuli</i>    | <i>Ca_Kabuli_denovo</i>      | 21255077                       | (G/A)       |
| 23613       | CakSNP23613    | <i>Kabuli</i>    | <i>Ca_Kabuli_denovo</i>      | 21255104                       | (G/C)       |
| 23614       | CakSNP23614    | <i>Kabuli</i>    | <i>Ca_Kabuli_denovo</i>      | 21256294                       | (T/C)       |
| 23615       | CakSNP23615    | <i>Kabuli</i>    | <i>Ca_Kabuli_denovo</i>      | 21262614                       | (C/G)       |
| 23616       | CakSNP23616    | <i>Kabuli</i>    | <i>Ca_Kabuli_denovo</i>      | 21262652                       | (T/C)       |
| 23617       | CakSNP23617    | <i>Kabuli</i>    | <i>Ca_Kabuli_denovo</i>      | 21267786                       | (A/G)       |
| 23618       | CakSNP23618    | <i>Kabuli</i>    | <i>Ca_Kabuli_denovo</i>      | 21270928                       | (G/A)       |
| 23619       | CakSNP23619    | <i>Kabuli</i>    | <i>Ca_Kabuli_denovo</i>      | 21271173                       | (G/A)       |
| 23620       | CakSNP23620    | <i>Kabuli</i>    | <i>Ca_Kabuli_denovo</i>      | 21271385                       | (C/A)       |
| 23621       | CakSNP23621    | <i>Kabuli</i>    | <i>Ca_Kabuli_denovo</i>      | 21272775                       | (A/G)       |
| 23622       | CakSNP23622    | <i>Kabuli</i>    | <i>Ca_Kabuli_denovo</i>      | 21277217                       | (C/T)       |
| 23623       | CakSNP23623    | <i>Kabuli</i>    | <i>Ca_Kabuli_denovo</i>      | 21277218                       | (C/T)       |
| 23624       | CakSNP23624    | <i>Kabuli</i>    | <i>Ca_Kabuli_denovo</i>      | 21279072                       | (C/T)       |
| 23625       | CakSNP23625    | <i>Kabuli</i>    | <i>Ca_Kabuli_denovo</i>      | 21279083                       | (A/G)       |
| 23626       | CakSNP23626    | <i>Kabuli</i>    | <i>Ca_Kabuli_denovo</i>      | 21282944                       | (G/A)       |
| 23627       | CakSNP23627    | <i>Kabuli</i>    | <i>Ca_Kabuli_denovo</i>      | 21283436                       | (C/T)       |
| 23628       | CakSNP23628    | <i>Kabuli</i>    | <i>Ca_Kabuli_denovo</i>      | 21284173                       | (C/G)       |
| 23629       | CakSNP23629    | <i>Kabuli</i>    | <i>Ca_Kabuli_denovo</i>      | 21295065                       | (G/C)       |
| 23630       | CakSNP23630    | <i>Kabuli</i>    | <i>Ca_Kabuli_denovo</i>      | 21295070                       | (T/C)       |
| 23631       | CakSNP23631    | <i>Kabuli</i>    | <i>Ca_Kabuli_denovo</i>      | 21296946                       | (T/A)       |
| 23632       | CakSNP23632    | <i>Kabuli</i>    | <i>Ca_Kabuli_denovo</i>      | 21296983                       | (G/A)       |

| <b>S.N.</b> | <b>SNP IDs</b> | <b>Cultivars</b> | <b>Chromosomes/scaffolds</b> | <b>Physical positions (bp)</b> | <b>SNPs</b> |
|-------------|----------------|------------------|------------------------------|--------------------------------|-------------|
| 23633       | CakSNP23633    | <i>Kabuli</i>    | <i>Ca_Kabuli_denovo</i>      | 21298616                       | (T/C)       |
| 23634       | CakSNP23634    | <i>Kabuli</i>    | <i>Ca_Kabuli_denovo</i>      | 21307635                       | (G/A)       |
| 23635       | CakSNP23635    | <i>Kabuli</i>    | <i>Ca_Kabuli_denovo</i>      | 21308677                       | (T/G)       |
| 23636       | CakSNP23636    | <i>Kabuli</i>    | <i>Ca_Kabuli_denovo</i>      | 21318213                       | (A/C)       |
| 23637       | CakSNP23637    | <i>Kabuli</i>    | <i>Ca_Kabuli_denovo</i>      | 21329472                       | (A/G)       |
| 23638       | CakSNP23638    | <i>Kabuli</i>    | <i>Ca_Kabuli_denovo</i>      | 21331823                       | (C/A)       |
| 23639       | CakSNP23639    | <i>Kabuli</i>    | <i>Ca_Kabuli_denovo</i>      | 21331826                       | (C/G)       |
| 23640       | CakSNP23640    | <i>Kabuli</i>    | <i>Ca_Kabuli_denovo</i>      | 21332074                       | (C/T)       |
| 23641       | CakSNP23641    | <i>Kabuli</i>    | <i>Ca_Kabuli_denovo</i>      | 21332076                       | (A/G)       |
| 23642       | CakSNP23642    | <i>Kabuli</i>    | <i>Ca_Kabuli_denovo</i>      | 21341423                       | (C/T)       |
| 23643       | CakSNP23643    | <i>Kabuli</i>    | <i>Ca_Kabuli_denovo</i>      | 21341964                       | (T/C)       |
| 23644       | CakSNP23644    | <i>Kabuli</i>    | <i>Ca_Kabuli_denovo</i>      | 21343141                       | (C/T)       |
| 23645       | CakSNP23645    | <i>Kabuli</i>    | <i>Ca_Kabuli_denovo</i>      | 21344835                       | (G/C)       |
| 23646       | CakSNP23646    | <i>Kabuli</i>    | <i>Ca_Kabuli_denovo</i>      | 21348438                       | (G/A)       |
| 23647       | CakSNP23647    | <i>Kabuli</i>    | <i>Ca_Kabuli_denovo</i>      | 21348450                       | (T/C)       |
| 23648       | CakSNP23648    | <i>Kabuli</i>    | <i>Ca_Kabuli_denovo</i>      | 21349005                       | (C/A)       |
| 23649       | CakSNP23649    | <i>Kabuli</i>    | <i>Ca_Kabuli_denovo</i>      | 21351422                       | (A/T)       |
| 23650       | CakSNP23650    | <i>Kabuli</i>    | <i>Ca_Kabuli_denovo</i>      | 21356826                       | (T/C)       |
| 23651       | CakSNP23651    | <i>Kabuli</i>    | <i>Ca_Kabuli_denovo</i>      | 21356851                       | (C/G)       |
| 23652       | CakSNP23652    | <i>Kabuli</i>    | <i>Ca_Kabuli_denovo</i>      | 21358482                       | (G/A)       |
| 23653       | CakSNP23653    | <i>Kabuli</i>    | <i>Ca_Kabuli_denovo</i>      | 21358524                       | (C/T)       |
| 23654       | CakSNP23654    | <i>Kabuli</i>    | <i>Ca_Kabuli_denovo</i>      | 21361581                       | (C/T)       |
| 23655       | CakSNP23655    | <i>Kabuli</i>    | <i>Ca_Kabuli_denovo</i>      | 21366756                       | (G/T)       |
| 23656       | CakSNP23656    | <i>Kabuli</i>    | <i>Ca_Kabuli_denovo</i>      | 21367515                       | (G/C)       |
| 23657       | CakSNP23657    | <i>Kabuli</i>    | <i>Ca_Kabuli_denovo</i>      | 21367533                       | (T/C)       |
| 23658       | CakSNP23658    | <i>Kabuli</i>    | <i>Ca_Kabuli_denovo</i>      | 21367537                       | (C/A)       |
| 23659       | CakSNP23659    | <i>Kabuli</i>    | <i>Ca_Kabuli_denovo</i>      | 21372130                       | (G/A)       |
| 23660       | CakSNP23660    | <i>Kabuli</i>    | <i>Ca_Kabuli_denovo</i>      | 21377916                       | (G/A)       |
| 23661       | CakSNP23661    | <i>Kabuli</i>    | <i>Ca_Kabuli_denovo</i>      | 21377970                       | (T/C)       |
| 23662       | CakSNP23662    | <i>Kabuli</i>    | <i>Ca_Kabuli_denovo</i>      | 21380467                       | (C/T)       |
| 23663       | CakSNP23663    | <i>Kabuli</i>    | <i>Ca_Kabuli_denovo</i>      | 21381098                       | (G/A)       |
| 23664       | CakSNP23664    | <i>Kabuli</i>    | <i>Ca_Kabuli_denovo</i>      | 21381144                       | (C/A)       |
| 23665       | CakSNP23665    | <i>Kabuli</i>    | <i>Ca_Kabuli_denovo</i>      | 21384365                       | (C/T)       |
| 23666       | CakSNP23666    | <i>Kabuli</i>    | <i>Ca_Kabuli_denovo</i>      | 21384367                       | (G/A)       |
| 23667       | CakSNP23667    | <i>Kabuli</i>    | <i>Ca_Kabuli_denovo</i>      | 21385344                       | (T/G)       |
| 23668       | CakSNP23668    | <i>Kabuli</i>    | <i>Ca_Kabuli_denovo</i>      | 21393480                       | (A/G)       |
| 23669       | CakSNP23669    | <i>Kabuli</i>    | <i>Ca_Kabuli_denovo</i>      | 21393528                       | (G/A)       |
| 23670       | CakSNP23670    | <i>Kabuli</i>    | <i>Ca_Kabuli_denovo</i>      | 21399407                       | (A/T)       |
| 23671       | CakSNP23671    | <i>Kabuli</i>    | <i>Ca_Kabuli_denovo</i>      | 21399412                       | (G/A)       |



| <b>S.N.</b> | <b>SNP IDs</b> | <b>Cultivars</b> | <b>Chromosomes/scaffolds</b> | <b>Physical positions (bp)</b> | <b>SNPs</b> |
|-------------|----------------|------------------|------------------------------|--------------------------------|-------------|
| 23672       | CakSNP23672    | <i>Kabuli</i>    | <i>Ca_Kabuli_denovo</i>      | 21400517                       | (C/T)       |
| 23673       | CakSNP23673    | <i>Kabuli</i>    | <i>Ca_Kabuli_denovo</i>      | 21400573                       | (C/T)       |
| 23674       | CakSNP23674    | <i>Kabuli</i>    | <i>Ca_Kabuli_denovo</i>      | 21407519                       | (A/G)       |
| 23675       | CakSNP23675    | <i>Kabuli</i>    | <i>Ca_Kabuli_denovo</i>      | 21421791                       | (A/G)       |
| 23676       | CakSNP23676    | <i>Kabuli</i>    | <i>Ca_Kabuli_denovo</i>      | 21424958                       | (T/G)       |
| 23677       | CakSNP23677    | <i>Kabuli</i>    | <i>Ca_Kabuli_denovo</i>      | 21440438                       | (T/G)       |
| 23678       | CakSNP23678    | <i>Kabuli</i>    | <i>Ca_Kabuli_denovo</i>      | 21445256                       | (G/A)       |
| 23679       | CakSNP23679    | <i>Kabuli</i>    | <i>Ca_Kabuli_denovo</i>      | 21445286                       | (A/G)       |
| 23680       | CakSNP23680    | <i>Kabuli</i>    | <i>Ca_Kabuli_denovo</i>      | 21451496                       | (T/C)       |
| 23681       | CakSNP23681    | <i>Kabuli</i>    | <i>Ca_Kabuli_denovo</i>      | 21452183                       | (A/G)       |
| 23682       | CakSNP23682    | <i>Kabuli</i>    | <i>Ca_Kabuli_denovo</i>      | 21455208                       | (T/C)       |
| 23683       | CakSNP23683    | <i>Kabuli</i>    | <i>Ca_Kabuli_denovo</i>      | 21455244                       | (C/A)       |
| 23684       | CakSNP23684    | <i>Kabuli</i>    | <i>Ca_Kabuli_denovo</i>      | 21459122                       | (C/A)       |
| 23685       | CakSNP23685    | <i>Kabuli</i>    | <i>Ca_Kabuli_denovo</i>      | 21459187                       | (G/A)       |
| 23686       | CakSNP23686    | <i>Kabuli</i>    | <i>Ca_Kabuli_denovo</i>      | 21467527                       | (T/G)       |
| 23687       | CakSNP23687    | <i>Kabuli</i>    | <i>Ca_Kabuli_denovo</i>      | 21467545                       | (C/T)       |
| 23688       | CakSNP23688    | <i>Kabuli</i>    | <i>Ca_Kabuli_denovo</i>      | 21475924                       | (A/G)       |
| 23689       | CakSNP23689    | <i>Kabuli</i>    | <i>Ca_Kabuli_denovo</i>      | 21478754                       | (G/A)       |
| 23690       | CakSNP23690    | <i>Kabuli</i>    | <i>Ca_Kabuli_denovo</i>      | 21482973                       | (G/C)       |
| 23691       | CakSNP23691    | <i>Kabuli</i>    | <i>Ca_Kabuli_denovo</i>      | 21484952                       | (C/T)       |
| 23692       | CakSNP23692    | <i>Kabuli</i>    | <i>Ca_Kabuli_denovo</i>      | 21490667                       | (C/T)       |
| 23693       | CakSNP23693    | <i>Kabuli</i>    | <i>Ca_Kabuli_denovo</i>      | 21491669                       | (C/G)       |
| 23694       | CakSNP23694    | <i>Kabuli</i>    | <i>Ca_Kabuli_denovo</i>      | 21493435                       | (C/A)       |
| 23695       | CakSNP23695    | <i>Kabuli</i>    | <i>Ca_Kabuli_denovo</i>      | 21501063                       | (A/G)       |
| 23696       | CakSNP23696    | <i>Kabuli</i>    | <i>Ca_Kabuli_denovo</i>      | 21503867                       | (A/G)       |
| 23697       | CakSNP23697    | <i>Kabuli</i>    | <i>Ca_Kabuli_denovo</i>      | 21505441                       | (A/T)       |
| 23698       | CakSNP23698    | <i>Kabuli</i>    | <i>Ca_Kabuli_denovo</i>      | 21506174                       | (G/A)       |
| 23699       | CakSNP23699    | <i>Kabuli</i>    | <i>Ca_Kabuli_denovo</i>      | 21506198                       | (C/T)       |
| 23700       | CakSNP23700    | <i>Kabuli</i>    | <i>Ca_Kabuli_denovo</i>      | 21510879                       | (G/C)       |
| 23701       | CakSNP23701    | <i>Kabuli</i>    | <i>Ca_Kabuli_denovo</i>      | 21512410                       | (G/A)       |
| 23702       | CakSNP23702    | <i>Kabuli</i>    | <i>Ca_Kabuli_denovo</i>      | 21512440                       | (T/C)       |
| 23703       | CakSNP23703    | <i>Kabuli</i>    | <i>Ca_Kabuli_denovo</i>      | 21517339                       | (T/C)       |
| 23704       | CakSNP23704    | <i>Kabuli</i>    | <i>Ca_Kabuli_denovo</i>      | 21517364                       | (G/A)       |
| 23705       | CakSNP23705    | <i>Kabuli</i>    | <i>Ca_Kabuli_denovo</i>      | 21521543                       | (T/C)       |
| 23706       | CakSNP23706    | <i>Kabuli</i>    | <i>Ca_Kabuli_denovo</i>      | 21529901                       | (C/T)       |
| 23707       | CakSNP23707    | <i>Kabuli</i>    | <i>Ca_Kabuli_denovo</i>      | 21533729                       | (C/A)       |
| 23708       | CakSNP23708    | <i>Kabuli</i>    | <i>Ca_Kabuli_denovo</i>      | 21536504                       | (G/A)       |
| 23709       | CakSNP23709    | <i>Kabuli</i>    | <i>Ca_Kabuli_denovo</i>      | 21536561                       | (C/G)       |
| 23710       | CakSNP23710    | <i>Kabuli</i>    | <i>Ca_Kabuli_denovo</i>      | 21536878                       | (T/C)       |

| <b>S.N.</b> | <b>SNP IDs</b> | <b>Cultivars</b> | <b>Chromosomes/scaffolds</b> | <b>Physical positions (bp)</b> | <b>SNPs</b> |
|-------------|----------------|------------------|------------------------------|--------------------------------|-------------|
| 23711       | CakSNP23711    | <i>Kabuli</i>    | <i>Ca_Kabuli_denovo</i>      | 21541280                       | (C/T)       |
| 23712       | CakSNP23712    | <i>Kabuli</i>    | <i>Ca_Kabuli_denovo</i>      | 21541298                       | (C/T)       |
| 23713       | CakSNP23713    | <i>Kabuli</i>    | <i>Ca_Kabuli_denovo</i>      | 21541870                       | (T/C)       |
| 23714       | CakSNP23714    | <i>Kabuli</i>    | <i>Ca_Kabuli_denovo</i>      | 21549651                       | (C/G)       |
| 23715       | CakSNP23715    | <i>Kabuli</i>    | <i>Ca_Kabuli_denovo</i>      | 21558166                       | (C/T)       |
| 23716       | CakSNP23716    | <i>Kabuli</i>    | <i>Ca_Kabuli_denovo</i>      | 21559750                       | (A/T)       |
| 23717       | CakSNP23717    | <i>Kabuli</i>    | <i>Ca_Kabuli_denovo</i>      | 21560733                       | (T/G)       |
| 23718       | CakSNP23718    | <i>Kabuli</i>    | <i>Ca_Kabuli_denovo</i>      | 21561543                       | (G/T)       |
| 23719       | CakSNP23719    | <i>Kabuli</i>    | <i>Ca_Kabuli_denovo</i>      | 21565201                       | (A/G)       |
| 23720       | CakSNP23720    | <i>Kabuli</i>    | <i>Ca_Kabuli_denovo</i>      | 21565213                       | (A/T)       |
| 23721       | CakSNP23721    | <i>Kabuli</i>    | <i>Ca_Kabuli_denovo</i>      | 21576483                       | (G/A)       |
| 23722       | CakSNP23722    | <i>Kabuli</i>    | <i>Ca_Kabuli_denovo</i>      | 21577694                       | (T/G)       |
| 23723       | CakSNP23723    | <i>Kabuli</i>    | <i>Ca_Kabuli_denovo</i>      | 21577730                       | (G/A)       |
| 23724       | CakSNP23724    | <i>Kabuli</i>    | <i>Ca_Kabuli_denovo</i>      | 21577736                       | (A/G)       |
| 23725       | CakSNP23725    | <i>Kabuli</i>    | <i>Ca_Kabuli_denovo</i>      | 21577930                       | (G/T)       |
| 23726       | CakSNP23726    | <i>Kabuli</i>    | <i>Ca_Kabuli_denovo</i>      | 21587730                       | (C/A)       |
| 23727       | CakSNP23727    | <i>Kabuli</i>    | <i>Ca_Kabuli_denovo</i>      | 21587742                       | (G/C)       |
| 23728       | CakSNP23728    | <i>Kabuli</i>    | <i>Ca_Kabuli_denovo</i>      | 21588175                       | (C/G)       |
| 23729       | CakSNP23729    | <i>Kabuli</i>    | <i>Ca_Kabuli_denovo</i>      | 21588402                       | (G/T)       |
| 23730       | CakSNP23730    | <i>Kabuli</i>    | <i>Ca_Kabuli_denovo</i>      | 21588479                       | (A/G)       |
| 23731       | CakSNP23731    | <i>Kabuli</i>    | <i>Ca_Kabuli_denovo</i>      | 21589510                       | (C/A)       |
| 23732       | CakSNP23732    | <i>Kabuli</i>    | <i>Ca_Kabuli_denovo</i>      | 21591421                       | (C/T)       |
| 23733       | CakSNP23733    | <i>Kabuli</i>    | <i>Ca_Kabuli_denovo</i>      | 21595077                       | (C/T)       |
| 23734       | CakSNP23734    | <i>Kabuli</i>    | <i>Ca_Kabuli_denovo</i>      | 21595111                       | (C/T)       |
| 23735       | CakSNP23735    | <i>Kabuli</i>    | <i>Ca_Kabuli_denovo</i>      | 21595640                       | (C/G)       |
| 23736       | CakSNP23736    | <i>Kabuli</i>    | <i>Ca_Kabuli_denovo</i>      | 21611670                       | (T/A)       |
| 23737       | CakSNP23737    | <i>Kabuli</i>    | <i>Ca_Kabuli_denovo</i>      | 21611698                       | (T/G)       |
| 23738       | CakSNP23738    | <i>Kabuli</i>    | <i>Ca_Kabuli_denovo</i>      | 21633676                       | (C/T)       |
| 23739       | CakSNP23739    | <i>Kabuli</i>    | <i>Ca_Kabuli_denovo</i>      | 21633691                       | (T/C)       |
| 23740       | CakSNP23740    | <i>Kabuli</i>    | <i>Ca_Kabuli_denovo</i>      | 21651168                       | (C/T)       |
| 23741       | CakSNP23741    | <i>Kabuli</i>    | <i>Ca_Kabuli_denovo</i>      | 21651210                       | (A/G)       |
| 23742       | CakSNP23742    | <i>Kabuli</i>    | <i>Ca_Kabuli_denovo</i>      | 21652622                       | (C/G)       |
| 23743       | CakSNP23743    | <i>Kabuli</i>    | <i>Ca_Kabuli_denovo</i>      | 21655049                       | (A/C)       |
| 23744       | CakSNP23744    | <i>Kabuli</i>    | <i>Ca_Kabuli_denovo</i>      | 21655050                       | (G/C)       |
| 23745       | CakSNP23745    | <i>Kabuli</i>    | <i>Ca_Kabuli_denovo</i>      | 21659196                       | (C/G)       |
| 23746       | CakSNP23746    | <i>Kabuli</i>    | <i>Ca_Kabuli_denovo</i>      | 21664740                       | (T/C)       |
| 23747       | CakSNP23747    | <i>Kabuli</i>    | <i>Ca_Kabuli_denovo</i>      | 21675772                       | (C/T)       |
| 23748       | CakSNP23748    | <i>Kabuli</i>    | <i>Ca_Kabuli_denovo</i>      | 21676093                       | (C/G)       |
| 23749       | CakSNP23749    | <i>Kabuli</i>    | <i>Ca_Kabuli_denovo</i>      | 21676147                       | (T/G)       |

| <b>S.N.</b> | <b>SNP IDs</b> | <b>Cultivars</b> | <b>Chromosomes/scaffolds</b> | <b>Physical positions (bp)</b> | <b>SNPs</b> |
|-------------|----------------|------------------|------------------------------|--------------------------------|-------------|
| 23750       | CakSNP23750    | <i>Kabuli</i>    | <i>Ca_Kabuli_denovo</i>      | 21676158                       | (T/G)       |
| 23751       | CakSNP23751    | <i>Kabuli</i>    | <i>Ca_Kabuli_denovo</i>      | 21683180                       | (A/T)       |
| 23752       | CakSNP23752    | <i>Kabuli</i>    | <i>Ca_Kabuli_denovo</i>      | 21683186                       | (G/A)       |
| 23753       | CakSNP23753    | <i>Kabuli</i>    | <i>Ca_Kabuli_denovo</i>      | 21690203                       | (T/G)       |
| 23754       | CakSNP23754    | <i>Kabuli</i>    | <i>Ca_Kabuli_denovo</i>      | 21691850                       | (T/C)       |
| 23755       | CakSNP23755    | <i>Kabuli</i>    | <i>Ca_Kabuli_denovo</i>      | 21691851                       | (T/C)       |
| 23756       | CakSNP23756    | <i>Kabuli</i>    | <i>Ca_Kabuli_denovo</i>      | 21701022                       | (C/G)       |
| 23757       | CakSNP23757    | <i>Kabuli</i>    | <i>Ca_Kabuli_denovo</i>      | 21702075                       | (G/A)       |
| 23758       | CakSNP23758    | <i>Kabuli</i>    | <i>Ca_Kabuli_denovo</i>      | 21702811                       | (T/G)       |
| 23759       | CakSNP23759    | <i>Kabuli</i>    | <i>Ca_Kabuli_denovo</i>      | 21705038                       | (C/G)       |
| 23760       | CakSNP23760    | <i>Kabuli</i>    | <i>Ca_Kabuli_denovo</i>      | 21707912                       | (C/A)       |
| 23761       | CakSNP23761    | <i>Kabuli</i>    | <i>Ca_Kabuli_denovo</i>      | 21713585                       | (T/C)       |
| 23762       | CakSNP23762    | <i>Kabuli</i>    | <i>Ca_Kabuli_denovo</i>      | 21713624                       | (A/G)       |
| 23763       | CakSNP23763    | <i>Kabuli</i>    | <i>Ca_Kabuli_denovo</i>      | 21717589                       | (T/C)       |
| 23764       | CakSNP23764    | <i>Kabuli</i>    | <i>Ca_Kabuli_denovo</i>      | 21717626                       | (A/G)       |
| 23765       | CakSNP23765    | <i>Kabuli</i>    | <i>Ca_Kabuli_denovo</i>      | 21724227                       | (A/G)       |
| 23766       | CakSNP23766    | <i>Kabuli</i>    | <i>Ca_Kabuli_denovo</i>      | 21724237                       | (T/C)       |
| 23767       | CakSNP23767    | <i>Kabuli</i>    | <i>Ca_Kabuli_denovo</i>      | 21725945                       | (A/C)       |
| 23768       | CakSNP23768    | <i>Kabuli</i>    | <i>Ca_Kabuli_denovo</i>      | 21725951                       | (A/G)       |
| 23769       | CakSNP23769    | <i>Kabuli</i>    | <i>Ca_Kabuli_denovo</i>      | 21726047                       | (C/A)       |
| 23770       | CakSNP23770    | <i>Kabuli</i>    | <i>Ca_Kabuli_denovo</i>      | 21726056                       | (C/T)       |
| 23771       | CakSNP23771    | <i>Kabuli</i>    | <i>Ca_Kabuli_denovo</i>      | 21726967                       | (G/A)       |
| 23772       | CakSNP23772    | <i>Kabuli</i>    | <i>Ca_Kabuli_denovo</i>      | 21729583                       | (A/G)       |
| 23773       | CakSNP23773    | <i>Kabuli</i>    | <i>Ca_Kabuli_denovo</i>      | 21730951                       | (C/T)       |
| 23774       | CakSNP23774    | <i>Kabuli</i>    | <i>Ca_Kabuli_denovo</i>      | 21730966                       | (C/T)       |
| 23775       | CakSNP23775    | <i>Kabuli</i>    | <i>Ca_Kabuli_denovo</i>      | 21745463                       | (A/T)       |
| 23776       | CakSNP23776    | <i>Kabuli</i>    | <i>Ca_Kabuli_denovo</i>      | 21745487                       | (T/C)       |
| 23777       | CakSNP23777    | <i>Kabuli</i>    | <i>Ca_Kabuli_denovo</i>      | 21748246                       | (C/T)       |
| 23778       | CakSNP23778    | <i>Kabuli</i>    | <i>Ca_Kabuli_denovo</i>      | 21748466                       | (G/C)       |
| 23779       | CakSNP23779    | <i>Kabuli</i>    | <i>Ca_Kabuli_denovo</i>      | 21759102                       | (T/G)       |
| 23780       | CakSNP23780    | <i>Kabuli</i>    | <i>Ca_Kabuli_denovo</i>      | 21759330                       | (C/T)       |
| 23781       | CakSNP23781    | <i>Kabuli</i>    | <i>Ca_Kabuli_denovo</i>      | 21759386                       | (C/T)       |
| 23782       | CakSNP23782    | <i>Kabuli</i>    | <i>Ca_Kabuli_denovo</i>      | 21761283                       | (T/C)       |
| 23783       | CakSNP23783    | <i>Kabuli</i>    | <i>Ca_Kabuli_denovo</i>      | 21762479                       | (A/C)       |
| 23784       | CakSNP23784    | <i>Kabuli</i>    | <i>Ca_Kabuli_denovo</i>      | 21764026                       | (C/G)       |
| 23785       | CakSNP23785    | <i>Kabuli</i>    | <i>Ca_Kabuli_denovo</i>      | 21765047                       | (G/A)       |
| 23786       | CakSNP23786    | <i>Kabuli</i>    | <i>Ca_Kabuli_denovo</i>      | 21768651                       | (C/A)       |
| 23787       | CakSNP23787    | <i>Kabuli</i>    | <i>Ca_Kabuli_denovo</i>      | 21768663                       | (G/A)       |
| 23788       | CakSNP23788    | <i>Kabuli</i>    | <i>Ca_Kabuli_denovo</i>      | 21778525                       | (G/C)       |

| <b>S.N.</b> | <b>SNP IDs</b> | <b>Cultivars</b> | <b>Chromosomes/scaffolds</b> | <b>Physical positions (bp)</b> | <b>SNPs</b> |
|-------------|----------------|------------------|------------------------------|--------------------------------|-------------|
| 23789       | CakSNP23789    | <i>Kabuli</i>    | <i>Ca_Kabuli_denovo</i>      | 21778543                       | (A/G)       |
| 23790       | CakSNP23790    | <i>Kabuli</i>    | <i>Ca_Kabuli_denovo</i>      | 21778657                       | (T/C)       |
| 23791       | CakSNP23791    | <i>Kabuli</i>    | <i>Ca_Kabuli_denovo</i>      | 21788450                       | (C/G)       |
| 23792       | CakSNP23792    | <i>Kabuli</i>    | <i>Ca_Kabuli_denovo</i>      | 21788489                       | (A/G)       |
| 23793       | CakSNP23793    | <i>Kabuli</i>    | <i>Ca_Kabuli_denovo</i>      | 21798025                       | (A/C)       |
| 23794       | CakSNP23794    | <i>Kabuli</i>    | <i>Ca_Kabuli_denovo</i>      | 21798919                       | (T/G)       |
| 23795       | CakSNP23795    | <i>Kabuli</i>    | <i>Ca_Kabuli_denovo</i>      | 21800681                       | (A/G)       |
| 23796       | CakSNP23796    | <i>Kabuli</i>    | <i>Ca_Kabuli_denovo</i>      | 21801770                       | (G/T)       |
| 23797       | CakSNP23797    | <i>Kabuli</i>    | <i>Ca_Kabuli_denovo</i>      | 21801797                       | (C/T)       |
| 23798       | CakSNP23798    | <i>Kabuli</i>    | <i>Ca_Kabuli_denovo</i>      | 21804246                       | (G/A)       |
| 23799       | CakSNP23799    | <i>Kabuli</i>    | <i>Ca_Kabuli_denovo</i>      | 21804254                       | (C/G)       |
| 23800       | CakSNP23800    | <i>Kabuli</i>    | <i>Ca_Kabuli_denovo</i>      | 21805673                       | (C/T)       |
| 23801       | CakSNP23801    | <i>Kabuli</i>    | <i>Ca_Kabuli_denovo</i>      | 21807860                       | (G/T)       |
| 23802       | CakSNP23802    | <i>Kabuli</i>    | <i>Ca_Kabuli_denovo</i>      | 21807880                       | (T/G)       |
| 23803       | CakSNP23803    | <i>Kabuli</i>    | <i>Ca_Kabuli_denovo</i>      | 21808391                       | (C/G)       |
| 23804       | CakSNP23804    | <i>Kabuli</i>    | <i>Ca_Kabuli_denovo</i>      | 21811794                       | (A/C)       |
| 23805       | CakSNP23805    | <i>Kabuli</i>    | <i>Ca_Kabuli_denovo</i>      | 21811800                       | (A/G)       |
| 23806       | CakSNP23806    | <i>Kabuli</i>    | <i>Ca_Kabuli_denovo</i>      | 21815122                       | (G/C)       |
| 23807       | CakSNP23807    | <i>Kabuli</i>    | <i>Ca_Kabuli_denovo</i>      | 21815146                       | (G/A)       |
| 23808       | CakSNP23808    | <i>Kabuli</i>    | <i>Ca_Kabuli_denovo</i>      | 21817157                       | (C/T)       |
| 23809       | CakSNP23809    | <i>Kabuli</i>    | <i>Ca_Kabuli_denovo</i>      | 21817167                       | (A/G)       |
| 23810       | CakSNP23810    | <i>Kabuli</i>    | <i>Ca_Kabuli_denovo</i>      | 21818738                       | (T/C)       |
| 23811       | CakSNP23811    | <i>Kabuli</i>    | <i>Ca_Kabuli_denovo</i>      | 21818765                       | (T/C)       |
| 23812       | CakSNP23812    | <i>Kabuli</i>    | <i>Ca_Kabuli_denovo</i>      | 21822406                       | (T/C)       |
| 23813       | CakSNP23813    | <i>Kabuli</i>    | <i>Ca_Kabuli_denovo</i>      | 21822476                       | (A/G)       |
| 23814       | CakSNP23814    | <i>Kabuli</i>    | <i>Ca_Kabuli_denovo</i>      | 21822488                       | (G/C)       |
| 23815       | CakSNP23815    | <i>Kabuli</i>    | <i>Ca_Kabuli_denovo</i>      | 21824609                       | (T/C)       |
| 23816       | CakSNP23816    | <i>Kabuli</i>    | <i>Ca_Kabuli_denovo</i>      | 21824648                       | (C/G)       |
| 23817       | CakSNP23817    | <i>Kabuli</i>    | <i>Ca_Kabuli_denovo</i>      | 21826085                       | (A/G)       |
| 23818       | CakSNP23818    | <i>Kabuli</i>    | <i>Ca_Kabuli_denovo</i>      | 21826147                       | (C/T)       |
| 23819       | CakSNP23819    | <i>Kabuli</i>    | <i>Ca_Kabuli_denovo</i>      | 21827387                       | (A/C)       |
| 23820       | CakSNP23820    | <i>Kabuli</i>    | <i>Ca_Kabuli_denovo</i>      | 21830766                       | (T/C)       |
| 23821       | CakSNP23821    | <i>Kabuli</i>    | <i>Ca_Kabuli_denovo</i>      | 21830792                       | (A/C)       |
| 23822       | CakSNP23822    | <i>Kabuli</i>    | <i>Ca_Kabuli_denovo</i>      | 21832533                       | (G/A)       |
| 23823       | CakSNP23823    | <i>Kabuli</i>    | <i>Ca_Kabuli_denovo</i>      | 21832563                       | (A/G)       |
| 23824       | CakSNP23824    | <i>Kabuli</i>    | <i>Ca_Kabuli_denovo</i>      | 21833724                       | (A/G)       |
| 23825       | CakSNP23825    | <i>Kabuli</i>    | <i>Ca_Kabuli_denovo</i>      | 21833757                       | (C/T)       |
| 23826       | CakSNP23826    | <i>Kabuli</i>    | <i>Ca_Kabuli_denovo</i>      | 21833915                       | (T/C)       |
| 23827       | CakSNP23827    | <i>Kabuli</i>    | <i>Ca_Kabuli_denovo</i>      | 21839422                       | (A/G)       |

| <b>S.N.</b> | <b>SNP IDs</b> | <b>Cultivars</b> | <b>Chromosomes/scaffolds</b> | <b>Physical positions (bp)</b> | <b>SNPs</b> |
|-------------|----------------|------------------|------------------------------|--------------------------------|-------------|
| 23828       | CakSNP23828    | <i>Kabuli</i>    | <i>Ca_Kabuli_denovo</i>      | 21842425                       | (C/T)       |
| 23829       | CakSNP23829    | <i>Kabuli</i>    | <i>Ca_Kabuli_denovo</i>      | 21857124                       | (G/A)       |
| 23830       | CakSNP23830    | <i>Kabuli</i>    | <i>Ca_Kabuli_denovo</i>      | 21860971                       | (C/G)       |
| 23831       | CakSNP23831    | <i>Kabuli</i>    | <i>Ca_Kabuli_denovo</i>      | 21860983                       | (G/T)       |
| 23832       | CakSNP23832    | <i>Kabuli</i>    | <i>Ca_Kabuli_denovo</i>      | 21862785                       | (A/G)       |
| 23833       | CakSNP23833    | <i>Kabuli</i>    | <i>Ca_Kabuli_denovo</i>      | 21863197                       | (T/G)       |
| 23834       | CakSNP23834    | <i>Kabuli</i>    | <i>Ca_Kabuli_denovo</i>      | 21863232                       | (A/G)       |
| 23835       | CakSNP23835    | <i>Kabuli</i>    | <i>Ca_Kabuli_denovo</i>      | 21868496                       | (C/T)       |
| 23836       | CakSNP23836    | <i>Kabuli</i>    | <i>Ca_Kabuli_denovo</i>      | 21876586                       | (T/C)       |
| 23837       | CakSNP23837    | <i>Kabuli</i>    | <i>Ca_Kabuli_denovo</i>      | 21876590                       | (G/C)       |
| 23838       | CakSNP23838    | <i>Kabuli</i>    | <i>Ca_Kabuli_denovo</i>      | 21876611                       | (G/A)       |
| 23839       | CakSNP23839    | <i>Kabuli</i>    | <i>Ca_Kabuli_denovo</i>      | 21880120                       | (C/T)       |
| 23840       | CakSNP23840    | <i>Kabuli</i>    | <i>Ca_Kabuli_denovo</i>      | 21880140                       | (G/C)       |
| 23841       | CakSNP23841    | <i>Kabuli</i>    | <i>Ca_Kabuli_denovo</i>      | 21882551                       | (C/T)       |
| 23842       | CakSNP23842    | <i>Kabuli</i>    | <i>Ca_Kabuli_denovo</i>      | 21883006                       | (C/G)       |
| 23843       | CakSNP23843    | <i>Kabuli</i>    | <i>Ca_Kabuli_denovo</i>      | 21883012                       | (G/T)       |
| 23844       | CakSNP23844    | <i>Kabuli</i>    | <i>Ca_Kabuli_denovo</i>      | 21885351                       | (G/C)       |
| 23845       | CakSNP23845    | <i>Kabuli</i>    | <i>Ca_Kabuli_denovo</i>      | 21886844                       | (G/A)       |
| 23846       | CakSNP23846    | <i>Kabuli</i>    | <i>Ca_Kabuli_denovo</i>      | 21886849                       | (C/T)       |
| 23847       | CakSNP23847    | <i>Kabuli</i>    | <i>Ca_Kabuli_denovo</i>      | 21888586                       | (G/A)       |
| 23848       | CakSNP23848    | <i>Kabuli</i>    | <i>Ca_Kabuli_denovo</i>      | 21893756                       | (C/T)       |
| 23849       | CakSNP23849    | <i>Kabuli</i>    | <i>Ca_Kabuli_denovo</i>      | 21894934                       | (T/C)       |
| 23850       | CakSNP23850    | <i>Kabuli</i>    | <i>Ca_Kabuli_denovo</i>      | 21894955                       | (A/G)       |
| 23851       | CakSNP23851    | <i>Kabuli</i>    | <i>Ca_Kabuli_denovo</i>      | 21898260                       | (G/A)       |
| 23852       | CakSNP23852    | <i>Kabuli</i>    | <i>Ca_Kabuli_denovo</i>      | 21898280                       | (A/G)       |
| 23853       | CakSNP23853    | <i>Kabuli</i>    | <i>Ca_Kabuli_denovo</i>      | 21903472                       | (C/G)       |
| 23854       | CakSNP23854    | <i>Kabuli</i>    | <i>Ca_Kabuli_denovo</i>      | 21903496                       | (T/C)       |
| 23855       | CakSNP23855    | <i>Kabuli</i>    | <i>Ca_Kabuli_denovo</i>      | 21905287                       | (A/G)       |
| 23856       | CakSNP23856    | <i>Kabuli</i>    | <i>Ca_Kabuli_denovo</i>      | 21905310                       | (G/A)       |
| 23857       | CakSNP23857    | <i>Kabuli</i>    | <i>Ca_Kabuli_denovo</i>      | 21907451                       | (A/C)       |
| 23858       | CakSNP23858    | <i>Kabuli</i>    | <i>Ca_Kabuli_denovo</i>      | 21907453                       | (A/C)       |
| 23859       | CakSNP23859    | <i>Kabuli</i>    | <i>Ca_Kabuli_denovo</i>      | 21913758                       | (T/C)       |
| 23860       | CakSNP23860    | <i>Kabuli</i>    | <i>Ca_Kabuli_denovo</i>      | 21915275                       | (G/A)       |
| 23861       | CakSNP23861    | <i>Kabuli</i>    | <i>Ca_Kabuli_denovo</i>      | 21915344                       | (A/T)       |
| 23862       | CakSNP23862    | <i>Kabuli</i>    | <i>Ca_Kabuli_denovo</i>      | 21916354                       | (G/C)       |
| 23863       | CakSNP23863    | <i>Kabuli</i>    | <i>Ca_Kabuli_denovo</i>      | 21916363                       | (G/C)       |
| 23864       | CakSNP23864    | <i>Kabuli</i>    | <i>Ca_Kabuli_denovo</i>      | 21917642                       | (C/T)       |
| 23865       | CakSNP23865    | <i>Kabuli</i>    | <i>Ca_Kabuli_denovo</i>      | 21923496                       | (C/T)       |
| 23866       | CakSNP23866    | <i>Kabuli</i>    | <i>Ca_Kabuli_denovo</i>      | 21926068                       | (G/A)       |

| <b>S.N.</b> | <b>SNP IDs</b> | <b>Cultivars</b> | <b>Chromosomes/scaffolds</b> | <b>Physical positions (bp)</b> | <b>SNPs</b> |
|-------------|----------------|------------------|------------------------------|--------------------------------|-------------|
| 23867       | CakSNP23867    | <i>Kabuli</i>    | <i>Ca_Kabuli_denovo</i>      | 21929425                       | (G/A)       |
| 23868       | CakSNP23868    | <i>Kabuli</i>    | <i>Ca_Kabuli_denovo</i>      | 21931570                       | (C/T)       |
| 23869       | CakSNP23869    | <i>Kabuli</i>    | <i>Ca_Kabuli_denovo</i>      | 21931574                       | (C/G)       |
| 23870       | CakSNP23870    | <i>Kabuli</i>    | <i>Ca_Kabuli_denovo</i>      | 21933266                       | (G/C)       |
| 23871       | CakSNP23871    | <i>Kabuli</i>    | <i>Ca_Kabuli_denovo</i>      | 21943045                       | (C/T)       |
| 23872       | CakSNP23872    | <i>Kabuli</i>    | <i>Ca_Kabuli_denovo</i>      | 21943062                       | (C/T)       |
| 23873       | CakSNP23873    | <i>Kabuli</i>    | <i>Ca_Kabuli_denovo</i>      | 21944105                       | (T/G)       |
| 23874       | CakSNP23874    | <i>Kabuli</i>    | <i>Ca_Kabuli_denovo</i>      | 21947457                       | (T/C)       |
| 23875       | CakSNP23875    | <i>Kabuli</i>    | <i>Ca_Kabuli_denovo</i>      | 21959356                       | (C/T)       |
| 23876       | CakSNP23876    | <i>Kabuli</i>    | <i>Ca_Kabuli_denovo</i>      | 21959383                       | (T/C)       |
| 23877       | CakSNP23877    | <i>Kabuli</i>    | <i>Ca_Kabuli_denovo</i>      | 21959872                       | (G/T)       |
| 23878       | CakSNP23878    | <i>Kabuli</i>    | <i>Ca_Kabuli_denovo</i>      | 21968331                       | (A/G)       |
| 23879       | CakSNP23879    | <i>Kabuli</i>    | <i>Ca_Kabuli_denovo</i>      | 21968856                       | (T/C)       |
| 23880       | CakSNP23880    | <i>Kabuli</i>    | <i>Ca_Kabuli_denovo</i>      | 21968860                       | (A/G)       |
| 23881       | CakSNP23881    | <i>Kabuli</i>    | <i>Ca_Kabuli_denovo</i>      | 21976577                       | (G/A)       |
| 23882       | CakSNP23882    | <i>Kabuli</i>    | <i>Ca_Kabuli_denovo</i>      | 21976623                       | (C/A)       |
| 23883       | CakSNP23883    | <i>Kabuli</i>    | <i>Ca_Kabuli_denovo</i>      | 21978703                       | (A/C)       |
| 23884       | CakSNP23884    | <i>Kabuli</i>    | <i>Ca_Kabuli_denovo</i>      | 21978727                       | (A/C)       |
| 23885       | CakSNP23885    | <i>Kabuli</i>    | <i>Ca_Kabuli_denovo</i>      | 21983999                       | (A/G)       |
| 23886       | CakSNP23886    | <i>Kabuli</i>    | <i>Ca_Kabuli_denovo</i>      | 21984023                       | (A/G)       |
| 23887       | CakSNP23887    | <i>Kabuli</i>    | <i>Ca_Kabuli_denovo</i>      | 21984026                       | (G/A)       |
| 23888       | CakSNP23888    | <i>Kabuli</i>    | <i>Ca_Kabuli_denovo</i>      | 21984665                       | (A/T)       |
| 23889       | CakSNP23889    | <i>Kabuli</i>    | <i>Ca_Kabuli_denovo</i>      | 21984673                       | (T/C)       |
| 23890       | CakSNP23890    | <i>Kabuli</i>    | <i>Ca_Kabuli_denovo</i>      | 21984871                       | (A/G)       |
| 23891       | CakSNP23891    | <i>Kabuli</i>    | <i>Ca_Kabuli_denovo</i>      | 21984916                       | (A/G)       |
| 23892       | CakSNP23892    | <i>Kabuli</i>    | <i>Ca_Kabuli_denovo</i>      | 21993694                       | (A/G)       |
| 23893       | CakSNP23893    | <i>Kabuli</i>    | <i>Ca_Kabuli_denovo</i>      | 21993700                       | (A/C)       |
| 23894       | CakSNP23894    | <i>Kabuli</i>    | <i>Ca_Kabuli_denovo</i>      | 21995519                       | (T/G)       |
| 23895       | CakSNP23895    | <i>Kabuli</i>    | <i>Ca_Kabuli_denovo</i>      | 21999081                       | (C/G)       |
| 23896       | CakSNP23896    | <i>Kabuli</i>    | <i>Ca_Kabuli_denovo</i>      | 21999091                       | (G/T)       |
| 23897       | CakSNP23897    | <i>Kabuli</i>    | <i>Ca_Kabuli_denovo</i>      | 22001325                       | (C/A)       |
| 23898       | CakSNP23898    | <i>Kabuli</i>    | <i>Ca_Kabuli_denovo</i>      | 22001329                       | (G/A)       |
| 23899       | CakSNP23899    | <i>Kabuli</i>    | <i>Ca_Kabuli_denovo</i>      | 22003126                       | (A/G)       |
| 23900       | CakSNP23900    | <i>Kabuli</i>    | <i>Ca_Kabuli_denovo</i>      | 22005228                       | (A/G)       |
| 23901       | CakSNP23901    | <i>Kabuli</i>    | <i>Ca_Kabuli_denovo</i>      | 22010799                       | (C/A)       |
| 23902       | CakSNP23902    | <i>Kabuli</i>    | <i>Ca_Kabuli_denovo</i>      | 22010803                       | (A/C)       |
| 23903       | CakSNP23903    | <i>Kabuli</i>    | <i>Ca_Kabuli_denovo</i>      | 22011716                       | (T/G)       |
| 23904       | CakSNP23904    | <i>Kabuli</i>    | <i>Ca_Kabuli_denovo</i>      | 22011794                       | (C/T)       |
| 23905       | CakSNP23905    | <i>Kabuli</i>    | <i>Ca_Kabuli_denovo</i>      | 22016922                       | (A/C)       |

| <b>S.N.</b> | <b>SNP IDs</b> | <b>Cultivars</b> | <b>Chromosomes/scaffolds</b> | <b>Physical positions (bp)</b> | <b>SNPs</b> |
|-------------|----------------|------------------|------------------------------|--------------------------------|-------------|
| 23906       | CakSNP23906    | <i>Kabuli</i>    | <i>Ca_Kabuli_denovo</i>      | 22020149                       | (C/T)       |
| 23907       | CakSNP23907    | <i>Kabuli</i>    | <i>Ca_Kabuli_denovo</i>      | 22020151                       | (G/A)       |
| 23908       | CakSNP23908    | <i>Kabuli</i>    | <i>Ca_Kabuli_denovo</i>      | 22026815                       | (G/A)       |
| 23909       | CakSNP23909    | <i>Kabuli</i>    | <i>Ca_Kabuli_denovo</i>      | 22027645                       | (C/T)       |
| 23910       | CakSNP23910    | <i>Kabuli</i>    | <i>Ca_Kabuli_denovo</i>      | 22028368                       | (C/T)       |
| 23911       | CakSNP23911    | <i>Kabuli</i>    | <i>Ca_Kabuli_denovo</i>      | 22028371                       | (A/G)       |
| 23912       | CakSNP23912    | <i>Kabuli</i>    | <i>Ca_Kabuli_denovo</i>      | 22028386                       | (T/C)       |
| 23913       | CakSNP23913    | <i>Kabuli</i>    | <i>Ca_Kabuli_denovo</i>      | 22028745                       | (T/G)       |
| 23914       | CakSNP23914    | <i>Kabuli</i>    | <i>Ca_Kabuli_denovo</i>      | 22031438                       | (T/G)       |
| 23915       | CakSNP23915    | <i>Kabuli</i>    | <i>Ca_Kabuli_denovo</i>      | 22040585                       | (G/T)       |
| 23916       | CakSNP23916    | <i>Kabuli</i>    | <i>Ca_Kabuli_denovo</i>      | 22044687                       | (C/T)       |
| 23917       | CakSNP23917    | <i>Kabuli</i>    | <i>Ca_Kabuli_denovo</i>      | 22048634                       | (C/A)       |
| 23918       | CakSNP23918    | <i>Kabuli</i>    | <i>Ca_Kabuli_denovo</i>      | 22048658                       | (G/A)       |
| 23919       | CakSNP23919    | <i>Kabuli</i>    | <i>Ca_Kabuli_denovo</i>      | 22054161                       | (A/G)       |
| 23920       | CakSNP23920    | <i>Kabuli</i>    | <i>Ca_Kabuli_denovo</i>      | 22057228                       | (T/C)       |
| 23921       | CakSNP23921    | <i>Kabuli</i>    | <i>Ca_Kabuli_denovo</i>      | 22059344                       | (C/G)       |
| 23922       | CakSNP23922    | <i>Kabuli</i>    | <i>Ca_Kabuli_denovo</i>      | 22059356                       | (A/G)       |
| 23923       | CakSNP23923    | <i>Kabuli</i>    | <i>Ca_Kabuli_denovo</i>      | 22070684                       | (T/G)       |
| 23924       | CakSNP23924    | <i>Kabuli</i>    | <i>Ca_Kabuli_denovo</i>      | 22071511                       | (G/A)       |
| 23925       | CakSNP23925    | <i>Kabuli</i>    | <i>Ca_Kabuli_denovo</i>      | 22072977                       | (T/G)       |
| 23926       | CakSNP23926    | <i>Kabuli</i>    | <i>Ca_Kabuli_denovo</i>      | 22074563                       | (A/T)       |
| 23927       | CakSNP23927    | <i>Kabuli</i>    | <i>Ca_Kabuli_denovo</i>      | 22078330                       | (T/C)       |
| 23928       | CakSNP23928    | <i>Kabuli</i>    | <i>Ca_Kabuli_denovo</i>      | 22078518                       | (T/C)       |
| 23929       | CakSNP23929    | <i>Kabuli</i>    | <i>Ca_Kabuli_denovo</i>      | 22078563                       | (G/C)       |
| 23930       | CakSNP23930    | <i>Kabuli</i>    | <i>Ca_Kabuli_denovo</i>      | 22082588                       | (T/C)       |
| 23931       | CakSNP23931    | <i>Kabuli</i>    | <i>Ca_Kabuli_denovo</i>      | 22082621                       | (C/T)       |
| 23932       | CakSNP23932    | <i>Kabuli</i>    | <i>Ca_Kabuli_denovo</i>      | 22083454                       | (C/T)       |
| 23933       | CakSNP23933    | <i>Kabuli</i>    | <i>Ca_Kabuli_denovo</i>      | 22086659                       | (T/G)       |
| 23934       | CakSNP23934    | <i>Kabuli</i>    | <i>Ca_Kabuli_denovo</i>      | 22093836                       | (G/A)       |
| 23935       | CakSNP23935    | <i>Kabuli</i>    | <i>Ca_Kabuli_denovo</i>      | 22095169                       | (C/T)       |
| 23936       | CakSNP23936    | <i>Kabuli</i>    | <i>Ca_Kabuli_denovo</i>      | 22099049                       | (A/T)       |
| 23937       | CakSNP23937    | <i>Kabuli</i>    | <i>Ca_Kabuli_denovo</i>      | 22099091                       | (G/A)       |
| 23938       | CakSNP23938    | <i>Kabuli</i>    | <i>Ca_Kabuli_denovo</i>      | 22105626                       | (T/C)       |
| 23939       | CakSNP23939    | <i>Kabuli</i>    | <i>Ca_Kabuli_denovo</i>      | 22109925                       | (C/G)       |
| 23940       | CakSNP23940    | <i>Kabuli</i>    | <i>Ca_Kabuli_denovo</i>      | 22109955                       | (T/C)       |
| 23941       | CakSNP23941    | <i>Kabuli</i>    | <i>Ca_Kabuli_denovo</i>      | 22115972                       | (C/G)       |
| 23942       | CakSNP23942    | <i>Kabuli</i>    | <i>Ca_Kabuli_denovo</i>      | 22127527                       | (C/G)       |
| 23943       | CakSNP23943    | <i>Kabuli</i>    | <i>Ca_Kabuli_denovo</i>      | 22145936                       | (C/A)       |
| 23944       | CakSNP23944    | <i>Kabuli</i>    | <i>Ca_Kabuli_denovo</i>      | 22145951                       | (A/G)       |

| <b>S.N.</b> | <b>SNP IDs</b> | <b>Cultivars</b> | <b>Chromosomes/scaffolds</b> | <b>Physical positions (bp)</b> | <b>SNPs</b> |
|-------------|----------------|------------------|------------------------------|--------------------------------|-------------|
| 23945       | CakSNP23945    | <i>Kabuli</i>    | <i>Ca_Kabuli_denovo</i>      | 22147873                       | (A/G)       |
| 23946       | CakSNP23946    | <i>Kabuli</i>    | <i>Ca_Kabuli_denovo</i>      | 22150196                       | (A/G)       |
| 23947       | CakSNP23947    | <i>Kabuli</i>    | <i>Ca_Kabuli_denovo</i>      | 22150199                       | (G/C)       |
| 23948       | CakSNP23948    | <i>Kabuli</i>    | <i>Ca_Kabuli_denovo</i>      | 22154593                       | (C/T)       |
| 23949       | CakSNP23949    | <i>Kabuli</i>    | <i>Ca_Kabuli_denovo</i>      | 22155073                       | (T/A)       |
| 23950       | CakSNP23950    | <i>Kabuli</i>    | <i>Ca_Kabuli_denovo</i>      | 22155343                       | (G/C)       |
| 23951       | CakSNP23951    | <i>Kabuli</i>    | <i>Ca_Kabuli_denovo</i>      | 22155358                       | (C/A)       |
| 23952       | CakSNP23952    | <i>Kabuli</i>    | <i>Ca_Kabuli_denovo</i>      | 22156352                       | (G/A)       |
| 23953       | CakSNP23953    | <i>Kabuli</i>    | <i>Ca_Kabuli_denovo</i>      | 22156384                       | (C/G)       |
| 23954       | CakSNP23954    | <i>Kabuli</i>    | <i>Ca_Kabuli_denovo</i>      | 22162484                       | (A/G)       |
| 23955       | CakSNP23955    | <i>Kabuli</i>    | <i>Ca_Kabuli_denovo</i>      | 22166305                       | (T/C)       |
| 23956       | CakSNP23956    | <i>Kabuli</i>    | <i>Ca_Kabuli_denovo</i>      | 22175865                       | (C/T)       |
| 23957       | CakSNP23957    | <i>Kabuli</i>    | <i>Ca_Kabuli_denovo</i>      | 22175884                       | (T/C)       |
| 23958       | CakSNP23958    | <i>Kabuli</i>    | <i>Ca_Kabuli_denovo</i>      | 22177441                       | (A/C)       |
| 23959       | CakSNP23959    | <i>Kabuli</i>    | <i>Ca_Kabuli_denovo</i>      | 22177732                       | (T/C)       |
| 23960       | CakSNP23960    | <i>Kabuli</i>    | <i>Ca_Kabuli_denovo</i>      | 22177762                       | (T/C)       |
| 23961       | CakSNP23961    | <i>Kabuli</i>    | <i>Ca_Kabuli_denovo</i>      | 22185743                       | (C/T)       |
| 23962       | CakSNP23962    | <i>Kabuli</i>    | <i>Ca_Kabuli_denovo</i>      | 22185763                       | (T/G)       |
| 23963       | CakSNP23963    | <i>Kabuli</i>    | <i>Ca_Kabuli_denovo</i>      | 22187682                       | (T/C)       |
| 23964       | CakSNP23964    | <i>Kabuli</i>    | <i>Ca_Kabuli_denovo</i>      | 22187734                       | (G/T)       |
| 23965       | CakSNP23965    | <i>Kabuli</i>    | <i>Ca_Kabuli_denovo</i>      | 22191206                       | (C/A)       |
| 23966       | CakSNP23966    | <i>Kabuli</i>    | <i>Ca_Kabuli_denovo</i>      | 22191233                       | (G/C)       |
| 23967       | CakSNP23967    | <i>Kabuli</i>    | <i>Ca_Kabuli_denovo</i>      | 22194019                       | (T/C)       |
| 23968       | CakSNP23968    | <i>Kabuli</i>    | <i>Ca_Kabuli_denovo</i>      | 22194078                       | (G/C)       |
| 23969       | CakSNP23969    | <i>Kabuli</i>    | <i>Ca_Kabuli_denovo</i>      | 22199275                       | (T/C)       |
| 23970       | CakSNP23970    | <i>Kabuli</i>    | <i>Ca_Kabuli_denovo</i>      | 22204436                       | (G/A)       |
| 23971       | CakSNP23971    | <i>Kabuli</i>    | <i>Ca_Kabuli_denovo</i>      | 22204475                       | (A/G)       |
| 23972       | CakSNP23972    | <i>Kabuli</i>    | <i>Ca_Kabuli_denovo</i>      | 22206003                       | (G/A)       |
| 23973       | CakSNP23973    | <i>Kabuli</i>    | <i>Ca_Kabuli_denovo</i>      | 22210115                       | (C/G)       |
| 23974       | CakSNP23974    | <i>Kabuli</i>    | <i>Ca_Kabuli_denovo</i>      | 22213095                       | (C/A)       |
| 23975       | CakSNP23975    | <i>Kabuli</i>    | <i>Ca_Kabuli_denovo</i>      | 22213116                       | (A/G)       |
| 23976       | CakSNP23976    | <i>Kabuli</i>    | <i>Ca_Kabuli_denovo</i>      | 22213901                       | (T/C)       |
| 23977       | CakSNP23977    | <i>Kabuli</i>    | <i>Ca_Kabuli_denovo</i>      | 22213930                       | (G/C)       |
| 23978       | CakSNP23978    | <i>Kabuli</i>    | <i>Ca_Kabuli_denovo</i>      | 22216043                       | (A/G)       |
| 23979       | CakSNP23979    | <i>Kabuli</i>    | <i>Ca_Kabuli_denovo</i>      | 22223582                       | (G/A)       |
| 23980       | CakSNP23980    | <i>Kabuli</i>    | <i>Ca_Kabuli_denovo</i>      | 22223614                       | (T/C)       |
| 23981       | CakSNP23981    | <i>Kabuli</i>    | <i>Ca_Kabuli_denovo</i>      | 22223700                       | (T/A)       |
| 23982       | CakSNP23982    | <i>Kabuli</i>    | <i>Ca_Kabuli_denovo</i>      | 22223707                       | (A/C)       |
| 23983       | CakSNP23983    | <i>Kabuli</i>    | <i>Ca_Kabuli_denovo</i>      | 22224352                       | (G/T)       |



| <b>S.N.</b> | <b>SNP IDs</b> | <b>Cultivars</b> | <b>Chromosomes/scaffolds</b> | <b>Physical positions (bp)</b> | <b>SNPs</b> |
|-------------|----------------|------------------|------------------------------|--------------------------------|-------------|
| 23984       | CakSNP23984    | <i>Kabuli</i>    | <i>Ca_Kabuli_denovo</i>      | 22224391                       | (G/T)       |
| 23985       | CakSNP23985    | <i>Kabuli</i>    | <i>Ca_Kabuli_denovo</i>      | 22236255                       | (C/T)       |
| 23986       | CakSNP23986    | <i>Kabuli</i>    | <i>Ca_Kabuli_denovo</i>      | 22236273                       | (T/G)       |
| 23987       | CakSNP23987    | <i>Kabuli</i>    | <i>Ca_Kabuli_denovo</i>      | 22237102                       | (G/A)       |
| 23988       | CakSNP23988    | <i>Kabuli</i>    | <i>Ca_Kabuli_denovo</i>      | 22242259                       | (C/T)       |
| 23989       | CakSNP23989    | <i>Kabuli</i>    | <i>Ca_Kabuli_denovo</i>      | 22242265                       | (C/T)       |
| 23990       | CakSNP23990    | <i>Kabuli</i>    | <i>Ca_Kabuli_denovo</i>      | 22258645                       | (A/G)       |
| 23991       | CakSNP23991    | <i>Kabuli</i>    | <i>Ca_Kabuli_denovo</i>      | 22266067                       | (G/C)       |
| 23992       | CakSNP23992    | <i>Kabuli</i>    | <i>Ca_Kabuli_denovo</i>      | 22274978                       | (T/C)       |
| 23993       | CakSNP23993    | <i>Kabuli</i>    | <i>Ca_Kabuli_denovo</i>      | 22277631                       | (G/C)       |
| 23994       | CakSNP23994    | <i>Kabuli</i>    | <i>Ca_Kabuli_denovo</i>      | 22277682                       | (C/T)       |
| 23995       | CakSNP23995    | <i>Kabuli</i>    | <i>Ca_Kabuli_denovo</i>      | 22279871                       | (C/A)       |
| 23996       | CakSNP23996    | <i>Kabuli</i>    | <i>Ca_Kabuli_denovo</i>      | 22279916                       | (C/T)       |
| 23997       | CakSNP23997    | <i>Kabuli</i>    | <i>Ca_Kabuli_denovo</i>      | 22280798                       | (G/A)       |
| 23998       | CakSNP23998    | <i>Kabuli</i>    | <i>Ca_Kabuli_denovo</i>      | 22288948                       | (T/C)       |
| 23999       | CakSNP23999    | <i>Kabuli</i>    | <i>Ca_Kabuli_denovo</i>      | 22290167                       | (C/A)       |
| 24000       | CakSNP24000    | <i>Kabuli</i>    | <i>Ca_Kabuli_denovo</i>      | 22290169                       | (A/G)       |
| 24001       | CakSNP24001    | <i>Kabuli</i>    | <i>Ca_Kabuli_denovo</i>      | 22297049                       | (C/A)       |
| 24002       | CakSNP24002    | <i>Kabuli</i>    | <i>Ca_Kabuli_denovo</i>      | 22297053                       | (G/C)       |
| 24003       | CakSNP24003    | <i>Kabuli</i>    | <i>Ca_Kabuli_denovo</i>      | 22297315                       | (T/C)       |
| 24004       | CakSNP24004    | <i>Kabuli</i>    | <i>Ca_Kabuli_denovo</i>      | 22297334                       | (A/G)       |
| 24005       | CakSNP24005    | <i>Kabuli</i>    | <i>Ca_Kabuli_denovo</i>      | 22302898                       | (G/A)       |
| 24006       | CakSNP24006    | <i>Kabuli</i>    | <i>Ca_Kabuli_denovo</i>      | 22309863                       | (A/C)       |
| 24007       | CakSNP24007    | <i>Kabuli</i>    | <i>Ca_Kabuli_denovo</i>      | 22315446                       | (A/T)       |
| 24008       | CakSNP24008    | <i>Kabuli</i>    | <i>Ca_Kabuli_denovo</i>      | 22315449                       | (A/C)       |
| 24009       | CakSNP24009    | <i>Kabuli</i>    | <i>Ca_Kabuli_denovo</i>      | 22324880                       | (T/G)       |
| 24010       | CakSNP24010    | <i>Kabuli</i>    | <i>Ca_Kabuli_denovo</i>      | 22324883                       | (G/A)       |
| 24011       | CakSNP24011    | <i>Kabuli</i>    | <i>Ca_Kabuli_denovo</i>      | 22328246                       | (A/G)       |
| 24012       | CakSNP24012    | <i>Kabuli</i>    | <i>Ca_Kabuli_denovo</i>      | 22328273                       | (C/T)       |
| 24013       | CakSNP24013    | <i>Kabuli</i>    | <i>Ca_Kabuli_denovo</i>      | 22332214                       | (G/T)       |
| 24014       | CakSNP24014    | <i>Kabuli</i>    | <i>Ca_Kabuli_denovo</i>      | 22337605                       | (C/A)       |
| 24015       | CakSNP24015    | <i>Kabuli</i>    | <i>Ca_Kabuli_denovo</i>      | 22340311                       | (C/A)       |
| 24016       | CakSNP24016    | <i>Kabuli</i>    | <i>Ca_Kabuli_denovo</i>      | 22340317                       | (T/G)       |
| 24017       | CakSNP24017    | <i>Kabuli</i>    | <i>Ca_Kabuli_denovo</i>      | 22342839                       | (G/C)       |
| 24018       | CakSNP24018    | <i>Kabuli</i>    | <i>Ca_Kabuli_denovo</i>      | 22343917                       | (T/C)       |
| 24019       | CakSNP24019    | <i>Kabuli</i>    | <i>Ca_Kabuli_denovo</i>      | 22343947                       | (A/C)       |
| 24020       | CakSNP24020    | <i>Kabuli</i>    | <i>Ca_Kabuli_denovo</i>      | 22344811                       | (T/C)       |
| 24021       | CakSNP24021    | <i>Kabuli</i>    | <i>Ca_Kabuli_denovo</i>      | 22347675                       | (T/C)       |
| 24022       | CakSNP24022    | <i>Kabuli</i>    | <i>Ca_Kabuli_denovo</i>      | 22355630                       | (A/G)       |

| <b>S.N.</b> | <b>SNP IDs</b> | <b>Cultivars</b> | <b>Chromosomes/scaffolds</b> | <b>Physical positions (bp)</b> | <b>SNPs</b> |
|-------------|----------------|------------------|------------------------------|--------------------------------|-------------|
| 24023       | CakSNP24023    | <i>Kabuli</i>    | <i>Ca_Kabuli_denovo</i>      | 22355651                       | (A/C)       |
| 24024       | CakSNP24024    | <i>Kabuli</i>    | <i>Ca_Kabuli_denovo</i>      | 22356787                       | (T/C)       |
| 24025       | CakSNP24025    | <i>Kabuli</i>    | <i>Ca_Kabuli_denovo</i>      | 22359477                       | (T/A)       |
| 24026       | CakSNP24026    | <i>Kabuli</i>    | <i>Ca_Kabuli_denovo</i>      | 22364608                       | (C/T)       |
| 24027       | CakSNP24027    | <i>Kabuli</i>    | <i>Ca_Kabuli_denovo</i>      | 22370629                       | (G/A)       |
| 24028       | CakSNP24028    | <i>Kabuli</i>    | <i>Ca_Kabuli_denovo</i>      | 22370640                       | (C/T)       |
| 24029       | CakSNP24029    | <i>Kabuli</i>    | <i>Ca_Kabuli_denovo</i>      | 22379899                       | (G/C)       |
| 24030       | CakSNP24030    | <i>Kabuli</i>    | <i>Ca_Kabuli_denovo</i>      | 22383680                       | (A/G)       |
| 24031       | CakSNP24031    | <i>Kabuli</i>    | <i>Ca_Kabuli_denovo</i>      | 22384415                       | (A/C)       |
| 24032       | CakSNP24032    | <i>Kabuli</i>    | <i>Ca_Kabuli_denovo</i>      | 22388447                       | (T/G)       |
| 24033       | CakSNP24033    | <i>Kabuli</i>    | <i>Ca_Kabuli_denovo</i>      | 22390212                       | (A/C)       |
| 24034       | CakSNP24034    | <i>Kabuli</i>    | <i>Ca_Kabuli_denovo</i>      | 22390214                       | (A/C)       |
| 24035       | CakSNP24035    | <i>Kabuli</i>    | <i>Ca_Kabuli_denovo</i>      | 22396027                       | (G/A)       |
| 24036       | CakSNP24036    | <i>Kabuli</i>    | <i>Ca_Kabuli_denovo</i>      | 22399918                       | (G/C)       |
| 24037       | CakSNP24037    | <i>Kabuli</i>    | <i>Ca_Kabuli_denovo</i>      | 22402729                       | (A/G)       |
| 24038       | CakSNP24038    | <i>Kabuli</i>    | <i>Ca_Kabuli_denovo</i>      | 22409040                       | (G/A)       |
| 24039       | CakSNP24039    | <i>Kabuli</i>    | <i>Ca_Kabuli_denovo</i>      | 22409090                       | (T/G)       |
| 24040       | CakSNP24040    | <i>Kabuli</i>    | <i>Ca_Kabuli_denovo</i>      | 22415065                       | (A/G)       |
| 24041       | CakSNP24041    | <i>Kabuli</i>    | <i>Ca_Kabuli_denovo</i>      | 22415068                       | (T/C)       |
| 24042       | CakSNP24042    | <i>Kabuli</i>    | <i>Ca_Kabuli_denovo</i>      | 22421870                       | (G/A)       |
| 24043       | CakSNP24043    | <i>Kabuli</i>    | <i>Ca_Kabuli_denovo</i>      | 22423241                       | (C/G)       |
| 24044       | CakSNP24044    | <i>Kabuli</i>    | <i>Ca_Kabuli_denovo</i>      | 22423263                       | (G/T)       |
| 24045       | CakSNP24045    | <i>Kabuli</i>    | <i>Ca_Kabuli_denovo</i>      | 22424926                       | (G/C)       |
| 24046       | CakSNP24046    | <i>Kabuli</i>    | <i>Ca_Kabuli_denovo</i>      | 22426360                       | (C/G)       |
| 24047       | CakSNP24047    | <i>Kabuli</i>    | <i>Ca_Kabuli_denovo</i>      | 22427046                       | (A/T)       |
| 24048       | CakSNP24048    | <i>Kabuli</i>    | <i>Ca_Kabuli_denovo</i>      | 22431626                       | (C/A)       |
| 24049       | CakSNP24049    | <i>Kabuli</i>    | <i>Ca_Kabuli_denovo</i>      | 22431652                       | (C/T)       |
| 24050       | CakSNP24050    | <i>Kabuli</i>    | <i>Ca_Kabuli_denovo</i>      | 22432380                       | (C/T)       |
| 24051       | CakSNP24051    | <i>Kabuli</i>    | <i>Ca_Kabuli_denovo</i>      | 22432382                       | (C/G)       |
| 24052       | CakSNP24052    | <i>Kabuli</i>    | <i>Ca_Kabuli_denovo</i>      | 22433280                       | (G/A)       |
| 24053       | CakSNP24053    | <i>Kabuli</i>    | <i>Ca_Kabuli_denovo</i>      | 22433295                       | (A/G)       |
| 24054       | CakSNP24054    | <i>Kabuli</i>    | <i>Ca_Kabuli_denovo</i>      | 22436951                       | (C/G)       |
| 24055       | CakSNP24055    | <i>Kabuli</i>    | <i>Ca_Kabuli_denovo</i>      | 22436975                       | (T/G)       |
| 24056       | CakSNP24056    | <i>Kabuli</i>    | <i>Ca_Kabuli_denovo</i>      | 22439163                       | (C/T)       |
| 24057       | CakSNP24057    | <i>Kabuli</i>    | <i>Ca_Kabuli_denovo</i>      | 22443182                       | (T/C)       |
| 24058       | CakSNP24058    | <i>Kabuli</i>    | <i>Ca_Kabuli_denovo</i>      | 22444030                       | (C/G)       |
| 24059       | CakSNP24059    | <i>Kabuli</i>    | <i>Ca_Kabuli_denovo</i>      | 22449467                       | (G/T)       |
| 24060       | CakSNP24060    | <i>Kabuli</i>    | <i>Ca_Kabuli_denovo</i>      | 22449512                       | (C/G)       |
| 24061       | CakSNP24061    | <i>Kabuli</i>    | <i>Ca_Kabuli_denovo</i>      | 22450397                       | (C/G)       |

| <b>S.N.</b> | <b>SNP IDs</b> | <b>Cultivars</b> | <b>Chromosomes/scaffolds</b> | <b>Physical positions (bp)</b> | <b>SNPs</b> |
|-------------|----------------|------------------|------------------------------|--------------------------------|-------------|
| 24062       | CakSNP24062    | <i>Kabuli</i>    | <i>Ca_Kabuli_denovo</i>      | 22451704                       | (C/T)       |
| 24063       | CakSNP24063    | <i>Kabuli</i>    | <i>Ca_Kabuli_denovo</i>      | 22452438                       | (A/G)       |
| 24064       | CakSNP24064    | <i>Kabuli</i>    | <i>Ca_Kabuli_denovo</i>      | 22452449                       | (C/G)       |
| 24065       | CakSNP24065    | <i>Kabuli</i>    | <i>Ca_Kabuli_denovo</i>      | 22453019                       | (T/C)       |
| 24066       | CakSNP24066    | <i>Kabuli</i>    | <i>Ca_Kabuli_denovo</i>      | 22453049                       | (A/G)       |
| 24067       | CakSNP24067    | <i>Kabuli</i>    | <i>Ca_Kabuli_denovo</i>      | 22453067                       | (G/A)       |
| 24068       | CakSNP24068    | <i>Kabuli</i>    | <i>Ca_Kabuli_denovo</i>      | 22454097                       | (A/G)       |
| 24069       | CakSNP24069    | <i>Kabuli</i>    | <i>Ca_Kabuli_denovo</i>      | 22454100                       | (G/A)       |
| 24070       | CakSNP24070    | <i>Kabuli</i>    | <i>Ca_Kabuli_denovo</i>      | 22462238                       | (C/G)       |
| 24071       | CakSNP24071    | <i>Kabuli</i>    | <i>Ca_Kabuli_denovo</i>      | 22462279                       | (T/C)       |
| 24072       | CakSNP24072    | <i>Kabuli</i>    | <i>Ca_Kabuli_denovo</i>      | 22463261                       | (G/C)       |
| 24073       | CakSNP24073    | <i>Kabuli</i>    | <i>Ca_Kabuli_denovo</i>      | 22464550                       | (C/A)       |
| 24074       | CakSNP24074    | <i>Kabuli</i>    | <i>Ca_Kabuli_denovo</i>      | 22464930                       | (T/C)       |
| 24075       | CakSNP24075    | <i>Kabuli</i>    | <i>Ca_Kabuli_denovo</i>      | 22464938                       | (G/C)       |
| 24076       | CakSNP24076    | <i>Kabuli</i>    | <i>Ca_Kabuli_denovo</i>      | 22465107                       | (T/C)       |
| 24077       | CakSNP24077    | <i>Kabuli</i>    | <i>Ca_Kabuli_denovo</i>      | 22465162                       | (A/G)       |
| 24078       | CakSNP24078    | <i>Kabuli</i>    | <i>Ca_Kabuli_denovo</i>      | 22466096                       | (G/T)       |
| 24079       | CakSNP24079    | <i>Kabuli</i>    | <i>Ca_Kabuli_denovo</i>      | 22476717                       | (A/C)       |
| 24080       | CakSNP24080    | <i>Kabuli</i>    | <i>Ca_Kabuli_denovo</i>      | 22476744                       | (T/C)       |
| 24081       | CakSNP24081    | <i>Kabuli</i>    | <i>Ca_Kabuli_denovo</i>      | 22479050                       | (A/G)       |
| 24082       | CakSNP24082    | <i>Kabuli</i>    | <i>Ca_Kabuli_denovo</i>      | 22479122                       | (T/C)       |
| 24083       | CakSNP24083    | <i>Kabuli</i>    | <i>Ca_Kabuli_denovo</i>      | 22480360                       | (C/T)       |
| 24084       | CakSNP24084    | <i>Kabuli</i>    | <i>Ca_Kabuli_denovo</i>      | 22480405                       | (C/T)       |
| 24085       | CakSNP24085    | <i>Kabuli</i>    | <i>Ca_Kabuli_denovo</i>      | 22486514                       | (G/A)       |
| 24086       | CakSNP24086    | <i>Kabuli</i>    | <i>Ca_Kabuli_denovo</i>      | 22486522                       | (C/T)       |
| 24087       | CakSNP24087    | <i>Kabuli</i>    | <i>Ca_Kabuli_denovo</i>      | 22493767                       | (T/C)       |
| 24088       | CakSNP24088    | <i>Kabuli</i>    | <i>Ca_Kabuli_denovo</i>      | 22504660                       | (C/T)       |
| 24089       | CakSNP24089    | <i>Kabuli</i>    | <i>Ca_Kabuli_denovo</i>      | 22514807                       | (C/A)       |
| 24090       | CakSNP24090    | <i>Kabuli</i>    | <i>Ca_Kabuli_denovo</i>      | 22516434                       | (A/G)       |
| 24091       | CakSNP24091    | <i>Kabuli</i>    | <i>Ca_Kabuli_denovo</i>      | 22520823                       | (G/C)       |
| 24092       | CakSNP24092    | <i>Kabuli</i>    | <i>Ca_Kabuli_denovo</i>      | 22520875                       | (T/C)       |
| 24093       | CakSNP24093    | <i>Kabuli</i>    | <i>Ca_Kabuli_denovo</i>      | 22521766                       | (G/C)       |
| 24094       | CakSNP24094    | <i>Kabuli</i>    | <i>Ca_Kabuli_denovo</i>      | 22521796                       | (C/T)       |
| 24095       | CakSNP24095    | <i>Kabuli</i>    | <i>Ca_Kabuli_denovo</i>      | 22529928                       | (A/G)       |
| 24096       | CakSNP24096    | <i>Kabuli</i>    | <i>Ca_Kabuli_denovo</i>      | 22531422                       | (A/C)       |
| 24097       | CakSNP24097    | <i>Kabuli</i>    | <i>Ca_Kabuli_denovo</i>      | 22531463                       | (A/G)       |
| 24098       | CakSNP24098    | <i>Kabuli</i>    | <i>Ca_Kabuli_denovo</i>      | 22534289                       | (A/G)       |
| 24099       | CakSNP24099    | <i>Kabuli</i>    | <i>Ca_Kabuli_denovo</i>      | 22542381                       | (T/G)       |
| 24100       | CakSNP24100    | <i>Kabuli</i>    | <i>Ca_Kabuli_denovo</i>      | 22542441                       | (G/A)       |

| <b>S.N.</b> | <b>SNP IDs</b> | <b>Cultivars</b> | <b>Chromosomes/scaffolds</b> | <b>Physical positions (bp)</b> | <b>SNPs</b> |
|-------------|----------------|------------------|------------------------------|--------------------------------|-------------|
| 24101       | CakSNP24101    | <i>Kabuli</i>    | <i>Ca_Kabuli_denovo</i>      | 22546566                       | (A/C)       |
| 24102       | CakSNP24102    | <i>Kabuli</i>    | <i>Ca_Kabuli_denovo</i>      | 22556801                       | (T/C)       |
| 24103       | CakSNP24103    | <i>Kabuli</i>    | <i>Ca_Kabuli_denovo</i>      | 22561762                       | (G/C)       |
| 24104       | CakSNP24104    | <i>Kabuli</i>    | <i>Ca_Kabuli_denovo</i>      | 22561771                       | (T/G)       |
| 24105       | CakSNP24105    | <i>Kabuli</i>    | <i>Ca_Kabuli_denovo</i>      | 22567017                       | (T/C)       |
| 24106       | CakSNP24106    | <i>Kabuli</i>    | <i>Ca_Kabuli_denovo</i>      | 22567026                       | (G/A)       |
| 24107       | CakSNP24107    | <i>Kabuli</i>    | <i>Ca_Kabuli_denovo</i>      | 22567059                       | (T/C)       |
| 24108       | CakSNP24108    | <i>Kabuli</i>    | <i>Ca_Kabuli_denovo</i>      | 22567219                       | (T/C)       |
| 24109       | CakSNP24109    | <i>Kabuli</i>    | <i>Ca_Kabuli_denovo</i>      | 22567221                       | (C/T)       |
| 24110       | CakSNP24110    | <i>Kabuli</i>    | <i>Ca_Kabuli_denovo</i>      | 22568144                       | (C/G)       |
| 24111       | CakSNP24111    | <i>Kabuli</i>    | <i>Ca_Kabuli_denovo</i>      | 22568186                       | (C/A)       |
| 24112       | CakSNP24112    | <i>Kabuli</i>    | <i>Ca_Kabuli_denovo</i>      | 22568434                       | (C/G)       |
| 24113       | CakSNP24113    | <i>Kabuli</i>    | <i>Ca_Kabuli_denovo</i>      | 22578643                       | (C/T)       |
| 24114       | CakSNP24114    | <i>Kabuli</i>    | <i>Ca_Kabuli_denovo</i>      | 22579945                       | (G/C)       |
| 24115       | CakSNP24115    | <i>Kabuli</i>    | <i>Ca_Kabuli_denovo</i>      | 22581626                       | (T/C)       |
| 24116       | CakSNP24116    | <i>Kabuli</i>    | <i>Ca_Kabuli_denovo</i>      | 22586002                       | (C/T)       |
| 24117       | CakSNP24117    | <i>Kabuli</i>    | <i>Ca_Kabuli_denovo</i>      | 22590746                       | (G/A)       |
| 24118       | CakSNP24118    | <i>Kabuli</i>    | <i>Ca_Kabuli_denovo</i>      | 22590761                       | (T/C)       |
| 24119       | CakSNP24119    | <i>Kabuli</i>    | <i>Ca_Kabuli_denovo</i>      | 22602100                       | (C/T)       |
| 24120       | CakSNP24120    | <i>Kabuli</i>    | <i>Ca_Kabuli_denovo</i>      | 22614086                       | (C/T)       |
| 24121       | CakSNP24121    | <i>Kabuli</i>    | <i>Ca_Kabuli_denovo</i>      | 22614088                       | (C/G)       |
| 24122       | CakSNP24122    | <i>Kabuli</i>    | <i>Ca_Kabuli_denovo</i>      | 22615811                       | (G/T)       |
| 24123       | CakSNP24123    | <i>Kabuli</i>    | <i>Ca_Kabuli_denovo</i>      | 22635214                       | (G/C)       |
| 24124       | CakSNP24124    | <i>Kabuli</i>    | <i>Ca_Kabuli_denovo</i>      | 22635612                       | (T/C)       |
| 24125       | CakSNP24125    | <i>Kabuli</i>    | <i>Ca_Kabuli_denovo</i>      | 22635633                       | (G/A)       |
| 24126       | CakSNP24126    | <i>Kabuli</i>    | <i>Ca_Kabuli_denovo</i>      | 22639106                       | (A/G)       |
| 24127       | CakSNP24127    | <i>Kabuli</i>    | <i>Ca_Kabuli_denovo</i>      | 22639177                       | (T/C)       |
| 24128       | CakSNP24128    | <i>Kabuli</i>    | <i>Ca_Kabuli_denovo</i>      | 22642069                       | (G/C)       |
| 24129       | CakSNP24129    | <i>Kabuli</i>    | <i>Ca_Kabuli_denovo</i>      | 22643291                       | (C/G)       |
| 24130       | CakSNP24130    | <i>Kabuli</i>    | <i>Ca_Kabuli_denovo</i>      | 22643294                       | (C/G)       |
| 24131       | CakSNP24131    | <i>Kabuli</i>    | <i>Ca_Kabuli_denovo</i>      | 22647446                       | (C/G)       |
| 24132       | CakSNP24132    | <i>Kabuli</i>    | <i>Ca_Kabuli_denovo</i>      | 22647449                       | (T/C)       |
| 24133       | CakSNP24133    | <i>Kabuli</i>    | <i>Ca_Kabuli_denovo</i>      | 22650472                       | (A/G)       |
| 24134       | CakSNP24134    | <i>Kabuli</i>    | <i>Ca_Kabuli_denovo</i>      | 22651126                       | (A/G)       |
| 24135       | CakSNP24135    | <i>Kabuli</i>    | <i>Ca_Kabuli_denovo</i>      | 22651157                       | (A/G)       |
| 24136       | CakSNP24136    | <i>Kabuli</i>    | <i>Ca_Kabuli_denovo</i>      | 22658903                       | (C/T)       |
| 24137       | CakSNP24137    | <i>Kabuli</i>    | <i>Ca_Kabuli_denovo</i>      | 22658906                       | (C/T)       |
| 24138       | CakSNP24138    | <i>Kabuli</i>    | <i>Ca_Kabuli_denovo</i>      | 22663217                       | (G/C)       |
| 24139       | CakSNP24139    | <i>Kabuli</i>    | <i>Ca_Kabuli_denovo</i>      | 22663232                       | (T/C)       |

| <b>S.N.</b> | <b>SNP IDs</b> | <b>Cultivars</b> | <b>Chromosomes/scaffolds</b> | <b>Physical positions (bp)</b> | <b>SNPs</b> |
|-------------|----------------|------------------|------------------------------|--------------------------------|-------------|
| 24140       | CakSNP24140    | <i>Kabuli</i>    | <i>Ca_Kabuli_denovo</i>      | 22665794                       | (C/G)       |
| 24141       | CakSNP24141    | <i>Kabuli</i>    | <i>Ca_Kabuli_denovo</i>      | 22667929                       | (T/C)       |
| 24142       | CakSNP24142    | <i>Kabuli</i>    | <i>Ca_Kabuli_denovo</i>      | 22698389                       | (C/G)       |
| 24143       | CakSNP24143    | <i>Kabuli</i>    | <i>Ca_Kabuli_denovo</i>      | 22701613                       | (A/T)       |
| 24144       | CakSNP24144    | <i>Kabuli</i>    | <i>Ca_Kabuli_denovo</i>      | 22701626                       | (C/T)       |
| 24145       | CakSNP24145    | <i>Kabuli</i>    | <i>Ca_Kabuli_denovo</i>      | 22704938                       | (C/G)       |
| 24146       | CakSNP24146    | <i>Kabuli</i>    | <i>Ca_Kabuli_denovo</i>      | 22706294                       | (A/G)       |
| 24147       | CakSNP24147    | <i>Kabuli</i>    | <i>Ca_Kabuli_denovo</i>      | 22706309                       | (G/A)       |
| 24148       | CakSNP24148    | <i>Kabuli</i>    | <i>Ca_Kabuli_denovo</i>      | 22711654                       | (T/C)       |
| 24149       | CakSNP24149    | <i>Kabuli</i>    | <i>Ca_Kabuli_denovo</i>      | 22712338                       | (G/C)       |
| 24150       | CakSNP24150    | <i>Kabuli</i>    | <i>Ca_Kabuli_denovo</i>      | 22722943                       | (T/C)       |
| 24151       | CakSNP24151    | <i>Kabuli</i>    | <i>Ca_Kabuli_denovo</i>      | 22722952                       | (G/C)       |
| 24152       | CakSNP24152    | <i>Kabuli</i>    | <i>Ca_Kabuli_denovo</i>      | 22725798                       | (G/C)       |
| 24153       | CakSNP24153    | <i>Kabuli</i>    | <i>Ca_Kabuli_denovo</i>      | 22725833                       | (G/T)       |
| 24154       | CakSNP24154    | <i>Kabuli</i>    | <i>Ca_Kabuli_denovo</i>      | 22733117                       | (A/G)       |
| 24155       | CakSNP24155    | <i>Kabuli</i>    | <i>Ca_Kabuli_denovo</i>      | 22733125                       | (C/G)       |
| 24156       | CakSNP24156    | <i>Kabuli</i>    | <i>Ca_Kabuli_denovo</i>      | 22735553                       | (A/G)       |
| 24157       | CakSNP24157    | <i>Kabuli</i>    | <i>Ca_Kabuli_denovo</i>      | 22735578                       | (A/G)       |
| 24158       | CakSNP24158    | <i>Kabuli</i>    | <i>Ca_Kabuli_denovo</i>      | 22749173                       | (G/T)       |
| 24159       | CakSNP24159    | <i>Kabuli</i>    | <i>Ca_Kabuli_denovo</i>      | 22749177                       | (G/C)       |
| 24160       | CakSNP24160    | <i>Kabuli</i>    | <i>Ca_Kabuli_denovo</i>      | 22749186                       | (T/G)       |
| 24161       | CakSNP24161    | <i>Kabuli</i>    | <i>Ca_Kabuli_denovo</i>      | 22762717                       | (C/G)       |
| 24162       | CakSNP24162    | <i>Kabuli</i>    | <i>Ca_Kabuli_denovo</i>      | 22762805                       | (T/G)       |
| 24163       | CakSNP24163    | <i>Kabuli</i>    | <i>Ca_Kabuli_denovo</i>      | 22762824                       | (G/T)       |
| 24164       | CakSNP24164    | <i>Kabuli</i>    | <i>Ca_Kabuli_denovo</i>      | 22762857                       | (C/G)       |
| 24165       | CakSNP24165    | <i>Kabuli</i>    | <i>Ca_Kabuli_denovo</i>      | 22767279                       | (T/G)       |
| 24166       | CakSNP24166    | <i>Kabuli</i>    | <i>Ca_Kabuli_denovo</i>      | 22767322                       | (C/A)       |
| 24167       | CakSNP24167    | <i>Kabuli</i>    | <i>Ca_Kabuli_denovo</i>      | 22770414                       | (T/C)       |
| 24168       | CakSNP24168    | <i>Kabuli</i>    | <i>Ca_Kabuli_denovo</i>      | 22770468                       | (A/G)       |
| 24169       | CakSNP24169    | <i>Kabuli</i>    | <i>Ca_Kabuli_denovo</i>      | 22772193                       | (G/C)       |
| 24170       | CakSNP24170    | <i>Kabuli</i>    | <i>Ca_Kabuli_denovo</i>      | 22772208                       | (T/G)       |
| 24171       | CakSNP24171    | <i>Kabuli</i>    | <i>Ca_Kabuli_denovo</i>      | 22774872                       | (A/G)       |
| 24172       | CakSNP24172    | <i>Kabuli</i>    | <i>Ca_Kabuli_denovo</i>      | 22774887                       | (C/A)       |
| 24173       | CakSNP24173    | <i>Kabuli</i>    | <i>Ca_Kabuli_denovo</i>      | 22774929                       | (T/G)       |
| 24174       | CakSNP24174    | <i>Kabuli</i>    | <i>Ca_Kabuli_denovo</i>      | 22774938                       | (C/G)       |
| 24175       | CakSNP24175    | <i>Kabuli</i>    | <i>Ca_Kabuli_denovo</i>      | 22779099                       | (G/T)       |
| 24176       | CakSNP24176    | <i>Kabuli</i>    | <i>Ca_Kabuli_denovo</i>      | 22786218                       | (T/G)       |
| 24177       | CakSNP24177    | <i>Kabuli</i>    | <i>Ca_Kabuli_denovo</i>      | 22786232                       | (A/G)       |
| 24178       | CakSNP24178    | <i>Kabuli</i>    | <i>Ca_Kabuli_denovo</i>      | 22786258                       | (G/A)       |

| <b>S.N.</b> | <b>SNP IDs</b> | <b>Cultivars</b> | <b>Chromosomes/scaffolds</b> | <b>Physical positions (bp)</b> | <b>SNPs</b> |
|-------------|----------------|------------------|------------------------------|--------------------------------|-------------|
| 24179       | CakSNP24179    | <i>Kabuli</i>    | <i>Ca_Kabuli_denovo</i>      | 22786269                       | (A/G)       |
| 24180       | CakSNP24180    | <i>Kabuli</i>    | <i>Ca_Kabuli_denovo</i>      | 23389902                       | (A/G)       |
| 24181       | CakSNP24181    | <i>Kabuli</i>    | <i>Ca_Kabuli_denovo</i>      | 26279213                       | (G/C)       |
| 24182       | CakSNP24182    | <i>Kabuli</i>    | <i>Ca_Kabuli_denovo</i>      | 26279215                       | (G/T)       |
| 24183       | CakSNP24183    | <i>Kabuli</i>    | <i>Ca_Kabuli_denovo</i>      | 26279249                       | (T/C)       |
| 24184       | CakSNP24184    | <i>Kabuli</i>    | <i>Ca_Kabuli_denovo</i>      | 28463588                       | (A/G)       |
| 24185       | CakSNP24185    | <i>Kabuli</i>    | <i>Ca_Kabuli_denovo</i>      | 28463605                       | (G/A)       |
| 24186       | CakSNP24186    | <i>Kabuli</i>    | <i>Ca_Kabuli_denovo</i>      | 30521758                       | (C/T)       |
| 24187       | CakSNP24187    | <i>Kabuli</i>    | <i>Ca_Kabuli_denovo</i>      | 30521760                       | (T/C)       |
| 24188       | CakSNP24188    | <i>Kabuli</i>    | <i>Ca_Kabuli_denovo</i>      | 30521761                       | (G/A)       |
| 24189       | CakSNP24189    | <i>Kabuli</i>    | <i>Ca_Kabuli_denovo</i>      | 30521763                       | (T/C)       |
| 24190       | CakSNP24190    | <i>Kabuli</i>    | <i>Ca_Kabuli_denovo</i>      | 30542416                       | (G/A)       |
| 24191       | CakSNP24191    | <i>Kabuli</i>    | <i>Ca_Kabuli_denovo</i>      | 30542450                       | (A/G)       |
| 24192       | CakSNP24192    | <i>Kabuli</i>    | <i>Ca_Kabuli_denovo</i>      | 30542467                       | (C/G)       |
| 24193       | CakSNP24193    | <i>Kabuli</i>    | <i>Ca_Kabuli_denovo</i>      | 30542477                       | (A/G)       |
| 24194       | CakSNP24194    | <i>Kabuli</i>    | <i>Ca_Kabuli_denovo</i>      | 30544320                       | (T/G)       |
| 24195       | CakSNP24195    | <i>Kabuli</i>    | <i>Ca_Kabuli_denovo</i>      | 30544340                       | (T/C)       |
| 24196       | CakSNP24196    | <i>Kabuli</i>    | <i>Ca_Kabuli_denovo</i>      | 30544349                       | (A/G)       |
| 24197       | CakSNP24197    | <i>Kabuli</i>    | <i>Ca_Kabuli_denovo</i>      | 30544978                       | (T/A)       |
| 24198       | CakSNP24198    | <i>Kabuli</i>    | <i>Ca_Kabuli_denovo</i>      | 30544987                       | (T/A)       |
| 24199       | CakSNP24199    | <i>Kabuli</i>    | <i>Ca_Kabuli_denovo</i>      | 30544997                       | (G/C)       |
| 24200       | CakSNP24200    | <i>Kabuli</i>    | <i>Ca_Kabuli_denovo</i>      | 30556074                       | (T/C)       |
| 24201       | CakSNP24201    | <i>Kabuli</i>    | <i>Ca_Kabuli_denovo</i>      | 30556076                       | (T/C)       |
| 24202       | CakSNP24202    | <i>Kabuli</i>    | <i>Ca_Kabuli_denovo</i>      | 30556080                       | (T/A)       |
| 24203       | CakSNP24203    | <i>Kabuli</i>    | <i>Ca_Kabuli_denovo</i>      | 30556081                       | (C/A)       |
| 24204       | CakSNP24204    | <i>Kabuli</i>    | <i>Ca_Kabuli_denovo</i>      | 30562605                       | (A/G)       |
| 24205       | CakSNP24205    | <i>Kabuli</i>    | <i>Ca_Kabuli_denovo</i>      | 30562663                       | (G/A)       |
| 24206       | CakSNP24206    | <i>Kabuli</i>    | <i>Ca_Kabuli_denovo</i>      | 30564215                       | (C/G)       |
| 24207       | CakSNP24207    | <i>Kabuli</i>    | <i>Ca_Kabuli_denovo</i>      | 30564217                       | (T/G)       |
| 24208       | CakSNP24208    | <i>Kabuli</i>    | <i>Ca_Kabuli_denovo</i>      | 30565114                       | (T/G)       |
| 24209       | CakSNP24209    | <i>Kabuli</i>    | <i>Ca_Kabuli_denovo</i>      | 30565484                       | (C/A)       |
| 24210       | CakSNP24210    | <i>Kabuli</i>    | <i>Ca_Kabuli_denovo</i>      | 30565552                       | (G/T)       |
| 24211       | CakSNP24211    | <i>Kabuli</i>    | <i>Ca_Kabuli_denovo</i>      | 30585112                       | (C/G)       |
| 24212       | CakSNP24212    | <i>Kabuli</i>    | <i>Ca_Kabuli_denovo</i>      | 30595715                       | (C/G)       |
| 24213       | CakSNP24213    | <i>Kabuli</i>    | <i>Ca_Kabuli_denovo</i>      | 30595726                       | (C/G)       |
| 24214       | CakSNP24214    | <i>Kabuli</i>    | <i>Ca_Kabuli_denovo</i>      | 30595772                       | (A/G)       |
| 24215       | CakSNP24215    | <i>Kabuli</i>    | <i>Ca_Kabuli_denovo</i>      | 30595815                       | (C/A)       |
| 24216       | CakSNP24216    | <i>Kabuli</i>    | <i>Ca_Kabuli_denovo</i>      | 30595832                       | (T/A)       |
| 24217       | CakSNP24217    | <i>Kabuli</i>    | <i>Ca_Kabuli_denovo</i>      | 30608911                       | (G/A)       |

| <b>S.N.</b> | <b>SNP IDs</b> | <b>Cultivars</b> | <b>Chromosomes/scaffolds</b> | <b>Physical positions (bp)</b> | <b>SNPs</b> |
|-------------|----------------|------------------|------------------------------|--------------------------------|-------------|
| 24218       | CakSNP24218    | <i>Kabuli</i>    | <i>Ca_Kabuli_denovo</i>      | 30608992                       | (G/T)       |
| 24219       | CakSNP24219    | <i>Kabuli</i>    | <i>Ca_Kabuli_denovo</i>      | 30608994                       | (T/C)       |
| 24220       | CakSNP24220    | <i>Kabuli</i>    | <i>Ca_Kabuli_denovo</i>      | 30624438                       | (A/T)       |
| 24221       | CakSNP24221    | <i>Kabuli</i>    | <i>Ca_Kabuli_denovo</i>      | 30624449                       | (G/A)       |
| 24222       | CakSNP24222    | <i>Kabuli</i>    | <i>Ca_Kabuli_denovo</i>      | 30654546                       | (A/G)       |
| 24223       | CakSNP24223    | <i>Kabuli</i>    | <i>Ca_Kabuli_denovo</i>      | 30654549                       | (A/C)       |
| 24224       | CakSNP24224    | <i>Kabuli</i>    | <i>Ca_Kabuli_denovo</i>      | 30654551                       | (C/G)       |
| 24225       | CakSNP24225    | <i>Kabuli</i>    | <i>Ca_Kabuli_denovo</i>      | 30654552                       | (T/G)       |
| 24226       | CakSNP24226    | <i>Kabuli</i>    | <i>Ca_Kabuli_denovo</i>      | 30689389                       | (C/T)       |
| 24227       | CakSNP24227    | <i>Kabuli</i>    | <i>Ca_Kabuli_denovo</i>      | 30692542                       | (C/T)       |
| 24228       | CakSNP24228    | <i>Kabuli</i>    | <i>Ca_Kabuli_denovo</i>      | 30701261                       | (G/A)       |
| 24229       | CakSNP24229    | <i>Kabuli</i>    | <i>Ca_Kabuli_denovo</i>      | 30701345                       | (T/A)       |
| 24230       | CakSNP24230    | <i>Kabuli</i>    | <i>Ca_Kabuli_denovo</i>      | 30713916                       | (A/G)       |
| 24231       | CakSNP24231    | <i>Kabuli</i>    | <i>Ca_Kabuli_denovo</i>      | 30713943                       | (A/G)       |
| 24232       | CakSNP24232    | <i>Kabuli</i>    | <i>Ca_Kabuli_denovo</i>      | 30717672                       | (T/G)       |
| 24233       | CakSNP24233    | <i>Kabuli</i>    | <i>Ca_Kabuli_denovo</i>      | 30720426                       | (T/G)       |
| 24234       | CakSNP24234    | <i>Kabuli</i>    | <i>Ca_Kabuli_denovo</i>      | 30720438                       | (G/T)       |
| 24235       | CakSNP24235    | <i>Kabuli</i>    | <i>Ca_Kabuli_denovo</i>      | 30720473                       | (A/G)       |
| 24236       | CakSNP24236    | <i>Kabuli</i>    | <i>Ca_Kabuli_denovo</i>      | 30722929                       | (G/T)       |
| 24237       | CakSNP24237    | <i>Kabuli</i>    | <i>Ca_Kabuli_denovo</i>      | 30722957                       | (T/G)       |
| 24238       | CakSNP24238    | <i>Kabuli</i>    | <i>Ca_Kabuli_denovo</i>      | 30722963                       | (A/G)       |
| 24239       | CakSNP24239    | <i>Kabuli</i>    | <i>Ca_Kabuli_denovo</i>      | 30722980                       | (G/A)       |
| 24240       | CakSNP24240    | <i>Kabuli</i>    | <i>Ca_Kabuli_denovo</i>      | 30726959                       | (G/A)       |
| 24241       | CakSNP24241    | <i>Kabuli</i>    | <i>Ca_Kabuli_denovo</i>      | 30726961                       | (G/A)       |
| 24242       | CakSNP24242    | <i>Kabuli</i>    | <i>Ca_Kabuli_denovo</i>      | 30726962                       | (A/G)       |
| 24243       | CakSNP24243    | <i>Kabuli</i>    | <i>Ca_Kabuli_denovo</i>      | 30726963                       | (G/A)       |
| 24244       | CakSNP24244    | <i>Kabuli</i>    | <i>Ca_Kabuli_denovo</i>      | 30728437                       | (T/G)       |
| 24245       | CakSNP24245    | <i>Kabuli</i>    | <i>Ca_Kabuli_denovo</i>      | 30728439                       | (A/G)       |
| 24246       | CakSNP24246    | <i>Kabuli</i>    | <i>Ca_Kabuli_denovo</i>      | 30728469                       | (A/G)       |
| 24247       | CakSNP24247    | <i>Kabuli</i>    | <i>Ca_Kabuli_denovo</i>      | 30730294                       | (G/C)       |
| 24248       | CakSNP24248    | <i>Kabuli</i>    | <i>Ca_Kabuli_denovo</i>      | 30730741                       | (C/A)       |
| 24249       | CakSNP24249    | <i>Kabuli</i>    | <i>Ca_Kabuli_denovo</i>      | 30730742                       | (C/G)       |
| 24250       | CakSNP24250    | <i>Kabuli</i>    | <i>Ca_Kabuli_denovo</i>      | 30730743                       | (A/C)       |
| 24251       | CakSNP24251    | <i>Kabuli</i>    | <i>Ca_Kabuli_denovo</i>      | 30730744                       | (G/A)       |
| 24252       | CakSNP24252    | <i>Kabuli</i>    | <i>Ca_Kabuli_denovo</i>      | 30730790                       | (A/C)       |
| 24253       | CakSNP24253    | <i>Kabuli</i>    | <i>Ca_Kabuli_denovo</i>      | 30731368                       | (C/G)       |
| 24254       | CakSNP24254    | <i>Kabuli</i>    | <i>Ca_Kabuli_denovo</i>      | 30731905                       | (T/G)       |
| 24255       | CakSNP24255    | <i>Kabuli</i>    | <i>Ca_Kabuli_denovo</i>      | 30731938                       | (T/G)       |
| 24256       | CakSNP24256    | <i>Kabuli</i>    | <i>Ca_Kabuli_denovo</i>      | 30733630                       | (T/G)       |

| <b>S.N.</b> | <b>SNP IDs</b> | <b>Cultivars</b> | <b>Chromosomes/scaffolds</b> | <b>Physical positions (bp)</b> | <b>SNPs</b> |
|-------------|----------------|------------------|------------------------------|--------------------------------|-------------|
| 24257       | CakSNP24257    | <i>Kabuli</i>    | <i>Ca_Kabuli_denovo</i>      | 30733690                       | (C/G)       |
| 24258       | CakSNP24258    | <i>Kabuli</i>    | <i>Ca_Kabuli_denovo</i>      | 30733694                       | (A/T)       |
| 24259       | CakSNP24259    | <i>Kabuli</i>    | <i>Ca_Kabuli_denovo</i>      | 30733703                       | (G/T)       |
| 24260       | CakSNP24260    | <i>Kabuli</i>    | <i>Ca_Kabuli_denovo</i>      | 30742989                       | (T/G)       |
| 24261       | CakSNP24261    | <i>Kabuli</i>    | <i>Ca_Kabuli_denovo</i>      | 30742991                       | (A/C)       |
| 24262       | CakSNP24262    | <i>Kabuli</i>    | <i>Ca_Kabuli_denovo</i>      | 30742993                       | (A/C)       |
| 24263       | CakSNP24263    | <i>Kabuli</i>    | <i>Ca_Kabuli_denovo</i>      | 30742994                       | (G/A)       |
| 24264       | CakSNP24264    | <i>Kabuli</i>    | <i>Ca_Kabuli_denovo</i>      | 30742995                       | (A/G)       |
| 24265       | CakSNP24265    | <i>Kabuli</i>    | <i>Ca_Kabuli_denovo</i>      | 30746022                       | (G/A)       |
| 24266       | CakSNP24266    | <i>Kabuli</i>    | <i>Ca_Kabuli_denovo</i>      | 30746046                       | (A/G)       |
| 24267       | CakSNP24267    | <i>Kabuli</i>    | <i>Ca_Kabuli_denovo</i>      | 30752607                       | (A/G)       |
| 24268       | CakSNP24268    | <i>Kabuli</i>    | <i>Ca_Kabuli_denovo</i>      | 30756090                       | (A/G)       |
| 24269       | CakSNP24269    | <i>Kabuli</i>    | <i>Ca_Kabuli_denovo</i>      | 30756108                       | (A/C)       |
| 24270       | CakSNP24270    | <i>Kabuli</i>    | <i>Ca_Kabuli_denovo</i>      | 30756117                       | (A/G)       |
| 24271       | CakSNP24271    | <i>Kabuli</i>    | <i>Ca_Kabuli_denovo</i>      | 30760173                       | (G/C)       |
| 24272       | CakSNP24272    | <i>Kabuli</i>    | <i>Ca_Kabuli_denovo</i>      | 30760215                       | (C/G)       |
| 24273       | CakSNP24273    | <i>Kabuli</i>    | <i>Ca_Kabuli_denovo</i>      | 30765681                       | (T/C)       |
| 24274       | CakSNP24274    | <i>Kabuli</i>    | <i>Ca_Kabuli_denovo</i>      | 30765682                       | (C/G)       |
| 24275       | CakSNP24275    | <i>Kabuli</i>    | <i>Ca_Kabuli_denovo</i>      | 30765685                       | (A/C)       |
| 24276       | CakSNP24276    | <i>Kabuli</i>    | <i>Ca_Kabuli_denovo</i>      | 30765686                       | (A/C)       |
| 24277       | CakSNP24277    | <i>Kabuli</i>    | <i>Ca_Kabuli_denovo</i>      | 30766057                       | (G/A)       |
| 24278       | CakSNP24278    | <i>Kabuli</i>    | <i>Ca_Kabuli_denovo</i>      | 30768470                       | (A/T)       |
| 24279       | CakSNP24279    | <i>Kabuli</i>    | <i>Ca_Kabuli_denovo</i>      | 30772256                       | (C/G)       |
| 24280       | CakSNP24280    | <i>Kabuli</i>    | <i>Ca_Kabuli_denovo</i>      | 30772258                       | (G/T)       |
| 24281       | CakSNP24281    | <i>Kabuli</i>    | <i>Ca_Kabuli_denovo</i>      | 30772260                       | (C/T)       |
| 24282       | CakSNP24282    | <i>Kabuli</i>    | <i>Ca_Kabuli_denovo</i>      | 30772261                       | (A/C)       |
| 24283       | CakSNP24283    | <i>Kabuli</i>    | <i>Ca_Kabuli_denovo</i>      | 30772262                       | (G/A)       |
| 24284       | CakSNP24284    | <i>Kabuli</i>    | <i>Ca_Kabuli_denovo</i>      | 30774518                       | (A/G)       |
| 24285       | CakSNP24285    | <i>Kabuli</i>    | <i>Ca_Kabuli_denovo</i>      | 30774519                       | (G/A)       |
| 24286       | CakSNP24286    | <i>Kabuli</i>    | <i>Ca_Kabuli_denovo</i>      | 30774521                       | (A/C)       |
| 24287       | CakSNP24287    | <i>Kabuli</i>    | <i>Ca_Kabuli_denovo</i>      | 30774523                       | (G/A)       |
| 24288       | CakSNP24288    | <i>Kabuli</i>    | <i>Ca_Kabuli_denovo</i>      | 30774524                       | (T/A)       |
| 24289       | CakSNP24289    | <i>Kabuli</i>    | <i>Ca_Kabuli_denovo</i>      | 30774525                       | (C/A)       |
| 24290       | CakSNP24290    | <i>Kabuli</i>    | <i>Ca_Kabuli_denovo</i>      | 30775207                       | (A/G)       |
| 24291       | CakSNP24291    | <i>Kabuli</i>    | <i>Ca_Kabuli_denovo</i>      | 30775239                       | (A/G)       |
| 24292       | CakSNP24292    | <i>Kabuli</i>    | <i>Ca_Kabuli_denovo</i>      | 30775240                       | (T/G)       |
| 24293       | CakSNP24293    | <i>Kabuli</i>    | <i>Ca_Kabuli_denovo</i>      | 30775682                       | (C/G)       |
| 24294       | CakSNP24294    | <i>Kabuli</i>    | <i>Ca_Kabuli_denovo</i>      | 30775707                       | (C/G)       |
| 24295       | CakSNP24295    | <i>Kabuli</i>    | <i>Ca_Kabuli_denovo</i>      | 30775728                       | (A/G)       |



| <b>S.N.</b> | <b>SNP IDs</b> | <b>Cultivars</b> | <b>Chromosomes/scaffolds</b> | <b>Physical positions (bp)</b> | <b>SNPs</b> |
|-------------|----------------|------------------|------------------------------|--------------------------------|-------------|
| 24296       | CakSNP24296    | <i>Kabuli</i>    | <i>Ca_Kabuli_denovo</i>      | 30776185                       | (C/G)       |
| 24297       | CakSNP24297    | <i>Kabuli</i>    | <i>Ca_Kabuli_denovo</i>      | 30776186                       | (A/G)       |
| 24298       | CakSNP24298    | <i>Kabuli</i>    | <i>Ca_Kabuli_denovo</i>      | 30776187                       | (A/T)       |
| 24299       | CakSNP24299    | <i>Kabuli</i>    | <i>Ca_Kabuli_denovo</i>      | 30776188                       | (C/T)       |
| 24300       | CakSNP24300    | <i>Kabuli</i>    | <i>Ca_Kabuli_denovo</i>      | 30780155                       | (C/A)       |
| 24301       | CakSNP24301    | <i>Kabuli</i>    | <i>Ca_Kabuli_denovo</i>      | 30780159                       | (A/G)       |
| 24302       | CakSNP24302    | <i>Kabuli</i>    | <i>Ca_Kabuli_denovo</i>      | 30780168                       | (T/G)       |
| 24303       | CakSNP24303    | <i>Kabuli</i>    | <i>Ca_Kabuli_denovo</i>      | 30780869                       | (T/G)       |
| 24304       | CakSNP24304    | <i>Kabuli</i>    | <i>Ca_Kabuli_denovo</i>      | 30780871                       | (C/G)       |
| 24305       | CakSNP24305    | <i>Kabuli</i>    | <i>Ca_Kabuli_denovo</i>      | 30780877                       | (A/G)       |
| 24306       | CakSNP24306    | <i>Kabuli</i>    | <i>Ca_Kabuli_denovo</i>      | 30780881                       | (C/G)       |
| 24307       | CakSNP24307    | <i>Kabuli</i>    | <i>Ca_Kabuli_denovo</i>      | 30780893                       | (T/G)       |
| 24308       | CakSNP24308    | <i>Kabuli</i>    | <i>Ca_Kabuli_denovo</i>      | 30786169                       | (A/G)       |
| 24309       | CakSNP24309    | <i>Kabuli</i>    | <i>Ca_Kabuli_denovo</i>      | 30786176                       | (G/A)       |
| 24310       | CakSNP24310    | <i>Kabuli</i>    | <i>Ca_Kabuli_denovo</i>      | 30786230                       | (T/G)       |
| 24311       | CakSNP24311    | <i>Kabuli</i>    | <i>Ca_Kabuli_denovo</i>      | 30786234                       | (A/G)       |
| 24312       | CakSNP24312    | <i>Kabuli</i>    | <i>Ca_Kabuli_denovo</i>      | 30792759                       | (T/C)       |
| 24313       | CakSNP24313    | <i>Kabuli</i>    | <i>Ca_Kabuli_denovo</i>      | 30792760                       | (A/C)       |
| 24314       | CakSNP24314    | <i>Kabuli</i>    | <i>Ca_Kabuli_denovo</i>      | 30792764                       | (A/C)       |
| 24315       | CakSNP24315    | <i>Kabuli</i>    | <i>Ca_Kabuli_denovo</i>      | 30792765                       | (A/G)       |
| 24316       | CakSNP24316    | <i>Kabuli</i>    | <i>Ca_Kabuli_denovo</i>      | 30797378                       | (T/G)       |
| 24317       | CakSNP24317    | <i>Kabuli</i>    | <i>Ca_Kabuli_denovo</i>      | 30797410                       | (A/G)       |
| 24318       | CakSNP24318    | <i>Kabuli</i>    | <i>Ca_Kabuli_denovo</i>      | 30798168                       | (C/G)       |
| 24319       | CakSNP24319    | <i>Kabuli</i>    | <i>Ca_Kabuli_denovo</i>      | 30798174                       | (A/G)       |
| 24320       | CakSNP24320    | <i>Kabuli</i>    | <i>Ca_Kabuli_denovo</i>      | 30798186                       | (G/A)       |
| 24321       | CakSNP24321    | <i>Kabuli</i>    | <i>Ca_Kabuli_denovo</i>      | 30798221                       | (A/G)       |
| 24322       | CakSNP24322    | <i>Kabuli</i>    | <i>Ca_Kabuli_denovo</i>      | 30806118                       | (A/G)       |
| 24323       | CakSNP24323    | <i>Kabuli</i>    | <i>Ca_Kabuli_denovo</i>      | 30807009                       | (C/G)       |
| 24324       | CakSNP24324    | <i>Kabuli</i>    | <i>Ca_Kabuli_denovo</i>      | 30814984                       | (C/A)       |
| 24325       | CakSNP24325    | <i>Kabuli</i>    | <i>Ca_Kabuli_denovo</i>      | 30814986                       | (G/T)       |
| 24326       | CakSNP24326    | <i>Kabuli</i>    | <i>Ca_Kabuli_denovo</i>      | 30814988                       | (C/A)       |
| 24327       | CakSNP24327    | <i>Kabuli</i>    | <i>Ca_Kabuli_denovo</i>      | 30814989                       | (C/A)       |
| 24328       | CakSNP24328    | <i>Kabuli</i>    | <i>Ca_Kabuli_denovo</i>      | 30814991                       | (A/G)       |
| 24329       | CakSNP24329    | <i>Kabuli</i>    | <i>Ca_Kabuli_denovo</i>      | 30817556                       | (C/G)       |
| 24330       | CakSNP24330    | <i>Kabuli</i>    | <i>Ca_Kabuli_denovo</i>      | 30820587                       | (G/A)       |
| 24331       | CakSNP24331    | <i>Kabuli</i>    | <i>Ca_Kabuli_denovo</i>      | 30820674                       | (A/G)       |
| 24332       | CakSNP24332    | <i>Kabuli</i>    | <i>Ca_Kabuli_denovo</i>      | 30820693                       | (T/G)       |
| 24333       | CakSNP24333    | <i>Kabuli</i>    | <i>Ca_Kabuli_denovo</i>      | 30820725                       | (A/G)       |
| 24334       | CakSNP24334    | <i>Kabuli</i>    | <i>Ca_Kabuli_denovo</i>      | 30820857                       | (G/A)       |

| <b>S.N.</b> | <b>SNP IDs</b> | <b>Cultivars</b> | <b>Chromosomes/scaffolds</b> | <b>Physical positions (bp)</b> | <b>SNPs</b> |
|-------------|----------------|------------------|------------------------------|--------------------------------|-------------|
| 24335       | CakSNP24335    | <i>Kabuli</i>    | <i>Ca_Kabuli_denovo</i>      | 30820885                       | (T/G)       |
| 24336       | CakSNP24336    | <i>Kabuli</i>    | <i>Ca_Kabuli_denovo</i>      | 30820935                       | (G/C)       |
| 24337       | CakSNP24337    | <i>Kabuli</i>    | <i>Ca_Kabuli_denovo</i>      | 30821907                       | (A/G)       |
| 24338       | CakSNP24338    | <i>Kabuli</i>    | <i>Ca_Kabuli_denovo</i>      | 30821961                       | (T/G)       |
| 24339       | CakSNP24339    | <i>Kabuli</i>    | <i>Ca_Kabuli_denovo</i>      | 30824952                       | (C/A)       |
| 24340       | CakSNP24340    | <i>Kabuli</i>    | <i>Ca_Kabuli_denovo</i>      | 30825037                       | (G/T)       |
| 24341       | CakSNP24341    | <i>Kabuli</i>    | <i>Ca_Kabuli_denovo</i>      | 30825073                       | (C/G)       |
| 24342       | CakSNP24342    | <i>Kabuli</i>    | <i>Ca_Kabuli_denovo</i>      | 30825087                       | (T/G)       |
| 24343       | CakSNP24343    | <i>Kabuli</i>    | <i>Ca_Kabuli_denovo</i>      | 30825459                       | (C/G)       |
| 24344       | CakSNP24344    | <i>Kabuli</i>    | <i>Ca_Kabuli_denovo</i>      | 30826626                       | (A/G)       |
| 24345       | CakSNP24345    | <i>Kabuli</i>    | <i>Ca_Kabuli_denovo</i>      | 30826708                       | (T/A)       |
| 24346       | CakSNP24346    | <i>Kabuli</i>    | <i>Ca_Kabuli_denovo</i>      | 30826821                       | (C/A)       |
| 24347       | CakSNP24347    | <i>Kabuli</i>    | <i>Ca_Kabuli_denovo</i>      | 30826826                       | (T/G)       |
| 24348       | CakSNP24348    | <i>Kabuli</i>    | <i>Ca_Kabuli_denovo</i>      | 30826840                       | (G/T)       |
| 24349       | CakSNP24349    | <i>Kabuli</i>    | <i>Ca_Kabuli_denovo</i>      | 30826859                       | (A/G)       |
| 24350       | CakSNP24350    | <i>Kabuli</i>    | <i>Ca_Kabuli_denovo</i>      | 30826896                       | (T/G)       |
| 24351       | CakSNP24351    | <i>Kabuli</i>    | <i>Ca_Kabuli_denovo</i>      | 30829200                       | (G/A)       |
| 24352       | CakSNP24352    | <i>Kabuli</i>    | <i>Ca_Kabuli_denovo</i>      | 30829213                       | (C/G)       |
| 24353       | CakSNP24353    | <i>Kabuli</i>    | <i>Ca_Kabuli_denovo</i>      | 30831665                       | (G/T)       |
| 24354       | CakSNP24354    | <i>Kabuli</i>    | <i>Ca_Kabuli_denovo</i>      | 30832766                       | (C/G)       |
| 24355       | CakSNP24355    | <i>Kabuli</i>    | <i>Ca_Kabuli_denovo</i>      | 30833069                       | (G/A)       |
| 24356       | CakSNP24356    | <i>Kabuli</i>    | <i>Ca_Kabuli_denovo</i>      | 30835039                       | (G/A)       |
| 24357       | CakSNP24357    | <i>Kabuli</i>    | <i>Ca_Kabuli_denovo</i>      | 30835060                       | (G/C)       |
| 24358       | CakSNP24358    | <i>Kabuli</i>    | <i>Ca_Kabuli_denovo</i>      | 30836884                       | (A/G)       |
| 24359       | CakSNP24359    | <i>Kabuli</i>    | <i>Ca_Kabuli_denovo</i>      | 30836903                       | (T/C)       |
| 24360       | CakSNP24360    | <i>Kabuli</i>    | <i>Ca_Kabuli_denovo</i>      | 30836937                       | (T/A)       |
| 24361       | CakSNP24361    | <i>Kabuli</i>    | <i>Ca_Kabuli_denovo</i>      | 30836941                       | (A/C)       |
| 24362       | CakSNP24362    | <i>Kabuli</i>    | <i>Ca_Kabuli_denovo</i>      | 30846063                       | (T/G)       |
| 24363       | CakSNP24363    | <i>Kabuli</i>    | <i>Ca_Kabuli_denovo</i>      | 30846909                       | (T/G)       |
| 24364       | CakSNP24364    | <i>Kabuli</i>    | <i>Ca_Kabuli_denovo</i>      | 30886176                       | (A/G)       |
| 24365       | CakSNP24365    | <i>Kabuli</i>    | <i>Ca_Kabuli_denovo</i>      | 30886221                       | (C/T)       |
| 24366       | CakSNP24366    | <i>Kabuli</i>    | <i>Ca_Kabuli_denovo</i>      | 30914188                       | (A/T)       |
| 24367       | CakSNP24367    | <i>Kabuli</i>    | <i>Ca_Kabuli_denovo</i>      | 30914189                       | (T/C)       |
| 24368       | CakSNP24368    | <i>Kabuli</i>    | <i>Ca_Kabuli_denovo</i>      | 30914190                       | (C/G)       |
| 24369       | CakSNP24369    | <i>Kabuli</i>    | <i>Ca_Kabuli_denovo</i>      | 30914192                       | (A/G)       |
| 24370       | CakSNP24370    | <i>Kabuli</i>    | <i>Ca_Kabuli_denovo</i>      | 30914194                       | (G/A)       |
| 24371       | CakSNP24371    | <i>Kabuli</i>    | <i>Ca_Kabuli_denovo</i>      | 30914211                       | (T/A)       |
| 24372       | CakSNP24372    | <i>Kabuli</i>    | <i>Ca_Kabuli_denovo</i>      | 30914217                       | (G/A)       |
| 24373       | CakSNP24373    | <i>Kabuli</i>    | <i>Ca_Kabuli_denovo</i>      | 30914223                       | (T/C)       |

| <b>S.N.</b> | <b>SNP IDs</b> | <b>Cultivars</b> | <b>Chromosomes/scaffolds</b> | <b>Physical positions (bp)</b> | <b>SNPs</b> |
|-------------|----------------|------------------|------------------------------|--------------------------------|-------------|
| 24374       | CakSNP24374    | <i>Kabuli</i>    | <i>Ca_Kabuli_denovo</i>      | 30914224                       | (C/T)       |
| 24375       | CakSNP24375    | <i>Kabuli</i>    | <i>Ca_Kabuli_denovo</i>      | 30915856                       | (G/A)       |
| 24376       | CakSNP24376    | <i>Kabuli</i>    | <i>Ca_Kabuli_denovo</i>      | 30920569                       | (C/A)       |
| 24377       | CakSNP24377    | <i>Kabuli</i>    | <i>Ca_Kabuli_denovo</i>      | 30920603                       | (A/G)       |
| 24378       | CakSNP24378    | <i>Kabuli</i>    | <i>Ca_Kabuli_denovo</i>      | 30920620                       | (C/G)       |
| 24379       | CakSNP24379    | <i>Kabuli</i>    | <i>Ca_Kabuli_denovo</i>      | 30920641                       | (T/G)       |
| 24380       | CakSNP24380    | <i>Kabuli</i>    | <i>Ca_Kabuli_denovo</i>      | 30948570                       | (A/G)       |
| 24381       | CakSNP24381    | <i>Kabuli</i>    | <i>Ca_Kabuli_denovo</i>      | 30948583                       | (C/T)       |
| 24382       | CakSNP24382    | <i>Kabuli</i>    | <i>Ca_Kabuli_denovo</i>      | 39369006                       | (C/G)       |
| 24383       | CakSNP24383    | <i>Kabuli</i>    | <i>Ca_Kabuli_denovo</i>      | 43194868                       | (T/A)       |
| 24384       | CakSNP24384    | <i>Kabuli</i>    | <i>Ca_Kabuli_denovo</i>      | 43209602                       | (C/T)       |
| 24385       | CakSNP24385    | <i>Kabuli</i>    | <i>Ca_Kabuli_denovo</i>      | 43209612                       | (T/G)       |
| 24386       | CakSNP24386    | <i>Kabuli</i>    | <i>Ca_Kabuli_denovo</i>      | 43706574                       | (C/T)       |
| 24387       | CakSNP24387    | <i>Kabuli</i>    | <i>Ca_Kabuli_denovo</i>      | 43711784                       | (A/C)       |
| 24388       | CakSNP24388    | <i>Kabuli</i>    | <i>Ca_Kabuli_denovo</i>      | 43711813                       | (A/G)       |
| 24389       | CakSNP24389    | <i>Kabuli</i>    | <i>Ca_Kabuli_denovo</i>      | 43990689                       | (T/C)       |
| 24390       | CakSNP24390    | <i>Kabuli</i>    | <i>Ca_Kabuli_denovo</i>      | 43990690                       | (C/G)       |
| 24391       | CakSNP24391    | <i>Kabuli</i>    | <i>Ca_Kabuli_denovo</i>      | 43990720                       | (C/A)       |
| 24392       | CakSNP24392    | <i>Kabuli</i>    | <i>Ca_Kabuli_denovo</i>      | 43990743                       | (G/A)       |
| 24393       | CakSNP24393    | <i>Kabuli</i>    | <i>Ca_Kabuli_denovo</i>      | 43990748                       | (T/G)       |
| 24394       | CakSNP24394    | <i>Kabuli</i>    | <i>Ca_Kabuli_denovo</i>      | 43990751                       | (C/T)       |
| 24395       | CakSNP24395    | <i>Kabuli</i>    | <i>Ca_Kabuli_denovo</i>      | 44029557                       | (G/C)       |
| 24396       | CakSNP24396    | <i>Kabuli</i>    | <i>Ca_Kabuli_denovo</i>      | 44029593                       | (G/T)       |
| 24397       | CakSNP24397    | <i>Kabuli</i>    | <i>Ca_Kabuli_denovo</i>      | 44071541                       | (A/G)       |
| 24398       | CakSNP24398    | <i>Kabuli</i>    | <i>Ca_Kabuli_denovo</i>      | 44449557                       | (A/G)       |
| 24399       | CakSNP24399    | <i>Kabuli</i>    | <i>Ca_Kabuli_denovo</i>      | 44449575                       | (A/T)       |
| 24400       | CakSNP24400    | <i>Kabuli</i>    | <i>Ca_Kabuli_denovo</i>      | 44449577                       | (G/A)       |
| 24401       | CakSNP24401    | <i>Kabuli</i>    | <i>Ca_Kabuli_denovo</i>      | 44449597                       | (C/T)       |
| 24402       | CakSNP24402    | <i>Kabuli</i>    | <i>Ca_Kabuli_denovo</i>      | 67025915                       | (G/T)       |
| 24403       | CakSNP24403    | <i>Kabuli</i>    | <i>Ca_Kabuli_denovo</i>      | 67025928                       | (G/T)       |
| 24404       | CakSNP24404    | <i>Kabuli</i>    | <i>Ca_Kabuli_denovo</i>      | 67030173                       | (T/G)       |
| 24405       | CakSNP24405    | <i>Kabuli</i>    | <i>Ca_Kabuli_denovo</i>      | 67030216                       | (A/G)       |

**Table S2.** SNP loci mapped on eight LGs of an intra-specific chickpea genetic linkage map (ICC 4958 x ICC 8261)

| <b>Linkage groups (LGs)/chromosomes (Chr)</b> | <b>SNPs mapped</b> | <b>Map length covered (cM)</b> | <b>Mean inter-marker distance (cM)</b> |
|-----------------------------------------------|--------------------|--------------------------------|----------------------------------------|
| LG(Chr)01                                     | 58                 | 102.7                          | 1.77                                   |
| LG(Chr)02                                     | 68                 | 110.2                          | 1.62                                   |
| LG(Chr)03                                     | 118                | 165.8                          | 1.41                                   |
| LG(Chr)04                                     | 124                | 168.5                          | 1.36                                   |
| LG(Chr)05                                     | 48                 | 73.6                           | 1.53                                   |
| LG(Chr)06                                     | 41                 | 66.8                           | 1.63                                   |
| LG(Chr)07                                     | 46                 | 85.7                           | 1.86                                   |
| LG(Chr)08                                     | 30                 | 57.9                           | 1.93                                   |
| <b>Total</b>                                  | <b>533</b>         | <b>831.2</b>                   | <b>1.56</b>                            |

**Table S3.** Diverse statistical measures estimated for Fe and Zn contents variation observed in a diversity panel and an intra-specific RIL mapping population (ICC 4958 x ICC 8261) of chickpea

| Traits | 92 <i>desi</i> and <i>kabuli</i> accessions |             |                                 |                                |                        | F <sub>7</sub> RIL mapping population (ICC 4958 x ICC 8261) |                      |                     |             |                                 |                                |                        |
|--------|---------------------------------------------|-------------|---------------------------------|--------------------------------|------------------------|-------------------------------------------------------------|----------------------|---------------------|-------------|---------------------------------|--------------------------------|------------------------|
|        |                                             |             |                                 |                                |                        | Parental accessions                                         |                      | Mapping individuals |             | Heritability (H <sup>2</sup> %) | Coefficient of variation (CV%) | ANOVA significance (P) |
|        | (Mean ± SD)                                 | Range (ppm) | Heritability (H <sup>2</sup> %) | Coefficient of variation (CV%) | ANOVA significance (P) | ICC 4958 (Mean ± SD)                                        | ICC 8261 (Mean ± SD) | (Mean ± SD)         | Range (ppm) |                                 |                                |                        |
| Fe     | 63.3 ± 13.3                                 | 40.2-91.0   | 80                              | 21.0                           | < 0.0001               | 43.0 ± 2.9                                                  | 64.8 ± 3.3           | 51.3 ± 5.0          | 40.3-67.0   | 81                              | 9.7                            | < 0.0001               |
| Zn     | 46.2 ± 9.1                                  | 26.8-61.8   | 82                              | 19.7                           | < 0.0001               | 30.2 ± 2.5                                                  | 42.0 ± 2.7           | 36.0 ± 3.8          | 27.9-48.5   | 83                              | 10.5                           | < 0.0001               |
